# Supplementary material for: Delayed and Accelerated Aging Share Common Longevity Assurance Mechanisms
Source: PubMed Central journal article supplement (PMC2493043; doi:10.1371/journal.pgen.1000161), 2008-08-15

A.

**LONG-LIVED OR NER-DEFICIENT MICE**

| Genotype                                              | Age      | Sex | No of mice | Tissue | Background           |
|-------------------------------------------------------|----------|-----|------------|--------|----------------------|
| <b>Long-lived mice and respective controls</b>        |          |     |            |        |                      |
| Ames dwarfs <sup>(df/df)</sup>                        | 6 months | F   | 8          | Liver  | Mixed                |
| CR                                                    | 6 months | F   | 8          | Liver  | Mixed                |
| Ames dwarfs <sup>(df/df)</sup> + CR                   | 6 months | F   | 8          | Liver  | Mixed                |
| <i>Wt control (N.AL.)</i>                             | 6 months | F   | 7          | Liver  | Mixed                |
| Snell <sup>(Pit1 dw/dw)</sup>                         | 3 months | F/M | 4          | Liver  | Mixed                |
| <i>Wt control</i>                                     | 3 months | F/M | 4          | Liver  | Mixed                |
| <i>Ghr</i> <sup>-/-</sup>                             | ns       | ns  | 3          | Liver  | Mixed                |
| <i>Wt control</i>                                     | ns       | ns  | 3          | Liver  | Mixed                |
| <b>NER-deficient mice and respective controls</b>     |          |     |            |        |                      |
| <i>Csb</i> <sup>m/m</sup> ; <i>Xpa</i> <sup>-/-</sup> | 15 days  | M   | 4          | Liver  | C57Bl/6J             |
| <i>Csb</i> <sup>m/m</sup>                             | 15 days  | M   | 4          | Liver  | C57Bl/6J             |
| <i>Xpa</i> <sup>-/-</sup>                             | 15 days  | M   | 4          | Liver  | C57Bl/6J             |
| <i>Wt control</i>                                     | 15 days  | M   | 5          | Liver  | C57Bl/6J             |
| <i>Erc1</i> <sup>+/-</sup>                            | 15 days  | F/M | 6          | Liver  | C57Bl/6J:FVB (50:50) |
| <i>Wt control</i>                                     | 15 days  | F/M | 6          | Liver  | C57Bl/6J:FVB (50:50) |
| <i>Erc1</i> <sup>-Δ-7</sup>                           | 4 months | F/M | 6          | Liver  | C57Bl/6J:FVB (50:50) |
| <i>Wt control</i>                                     | 4 months | F/M | 6          | Liver  | C57Bl/6J:FVB (50:50) |

**NATURALLY AGED MICE**

|             |           |   |              |                             |          |
|-------------|-----------|---|--------------|-----------------------------|----------|
| Young adult | 13 weeks  | F | 3 mice/organ | liver, kidney, lung, spleen | C57Bl/6J |
| Old         | 130 weeks | F | 3 mice/organ | liver, kidney, lung, spleen | C57Bl/6J |

B.

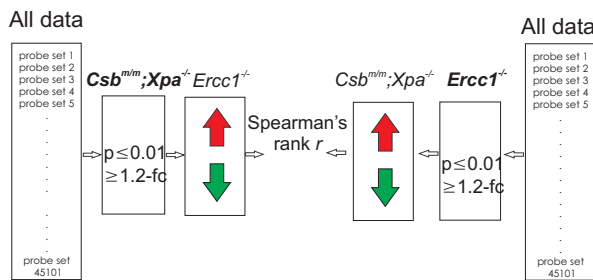

C.

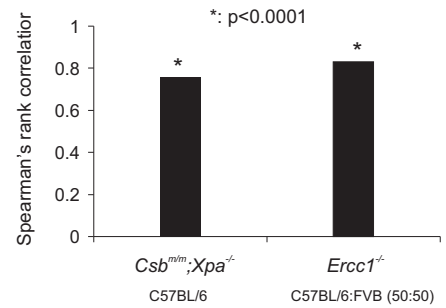

Supplement: pgen.1000161.s001.pdf [file pgen.1000161.s001.pdf]
