# Supplementary material for: Delayed and Accelerated Aging Share Common Longevity Assurance Mechanisms
Source: PubMed Central journal article supplement (PMC2493043; doi:10.1371/journal.pgen.1000161), 2008-08-15

A.

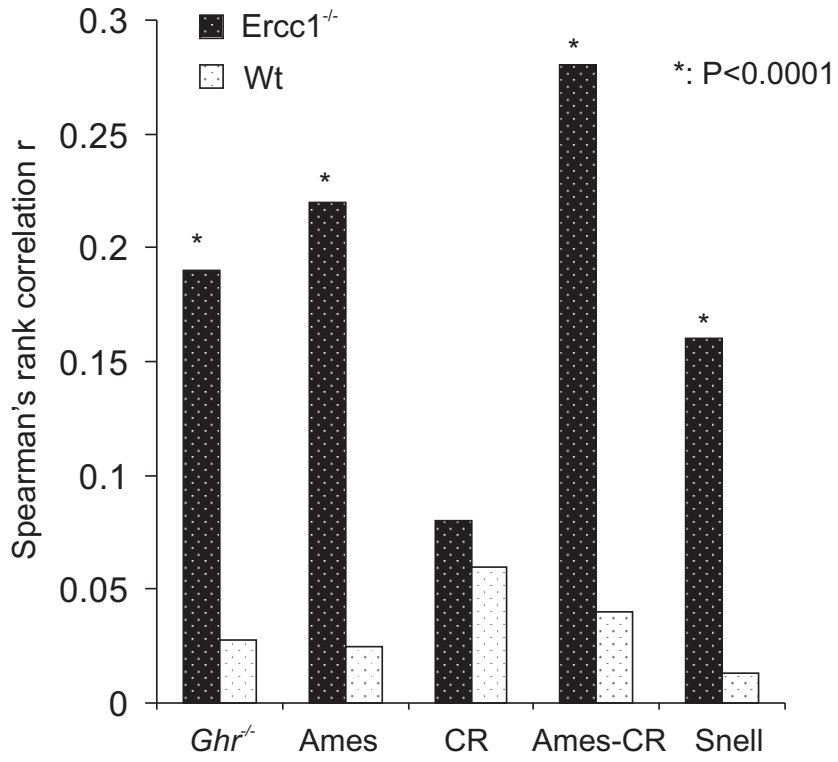

B.

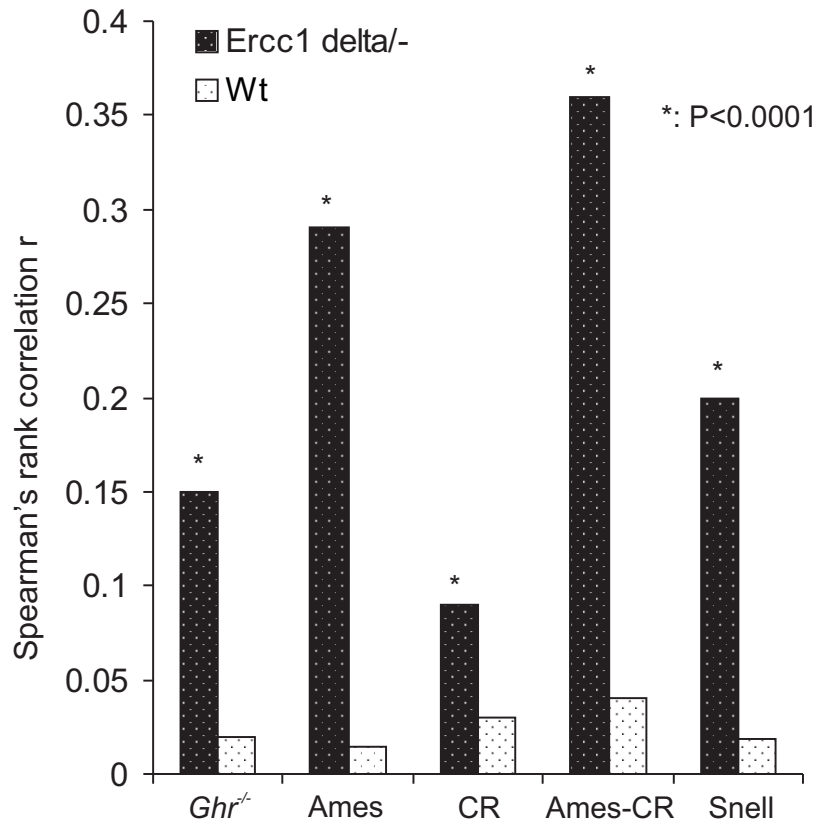

Supplement: pgen.1000161.s002.pdf [file pgen.1000161.s002.pdf]
