# Supplementary material for: Delayed and Accelerated Aging Share Common Longevity Assurance Mechanisms
Source: PubMed Central journal article supplement (PMC2493043; doi:10.1371/journal.pgen.1000161), 2008-08-15
Supplement: pgen.1000161.s004.pdf [file pgen.1000161.s004.pdf]

130-week old mice

|          | Liver 1 | Liver 2 | Liver 3 |
|----------|---------|---------|---------|
| Snell1   | 0.01    | 0.05    | -0.02   |
| Snell2   | 0.02    | 0.07    | 0.00    |
| Snell3   | 0.03    | 0.09    | 0.01    |
| Snell4   | 0.01    | 0.08    | -0.01   |
| Ghr1     | 0.17    | 0.17    | 0.17    |
| Ghr2     | -0.03   | -0.03   | -0.03   |
| Ghr3     | 0.02    | 0.01    | 0.02    |
| DF.AL1   | 0.07    | 0.07    | 0.07    |
| DF.AL2   | -0.09   | -0.09   | -0.09   |
| DF.AL3   | -0.12   | -0.12   | -0.12   |
| DF.AL4   | 0.24    | 0.24    | 0.24    |
| DF.AL5   | -0.08   | -0.08   | -0.08   |
| DF.AL6   | 0.08    | 0.08    | 0.08    |
| DF.AL7   | -0.18   | -0.18   | -0.18   |
| DF.AL8   | 0.26    | 0.26    | 0.26    |
| DF.CR1   | -0.05   | -0.04   | -0.04   |
| DF.CR2   | 0.02    | 0.02    | 0.02    |
| DF.CR3   | 0.06    | 0.06    | 0.06    |
| DF.CR4   | -0.22   | -0.22   | -0.22   |
| DF.CR5   | -0.20   | -0.20   | -0.20   |
| DF.CR6   | 0.26    | 0.26    | 0.26    |
| DF.CR7   | -0.19   | -0.19   | -0.19   |
| DF.CR8   | 0.25    | 0.25    | 0.25    |
| N.CR1    | -0.18   | -0.18   | -0.18   |
| N.CR2    | -0.06   | -0.06   | -0.06   |
| N.CR3    | -0.16   | -0.16   | -0.16   |
| N.CR4    | -0.01   | -0.01   | -0.01   |
| N.CR5    | -0.21   | -0.21   | -0.21   |
| N.CR6    | -0.10   | -0.11   | -0.11   |
| N.CR7    | -0.14   | -0.14   | -0.15   |
| N.CR8    | -0.20   | -0.19   | -0.19   |
| CSBXPA 1 | 0.36    | 0.36    | 0.36    |
| CSBXPA 2 | 0.41    | 0.41    | 0.41    |
| CSBXPA 3 | 0.42    | 0.42    | 0.42    |
| CSBXPA 4 | 0.28    | 0.28    | 0.28    |
| ERCC 1   | 0.25    | 0.26    | 0.26    |
| ERCC 2   | 0.33    | 0.33    | 0.33    |
| ERCC 3   | 0.33    | 0.33    | 0.34    |
| ERCC 4   | 0.37    | 0.37    | 0.36    |
| ERCC 5   | 0.41    | 0.41    | 0.41    |
| ERCC 6   | 0.21    | 0.21    | 0.22    |
| ErccD 1  | 0.28    | 0.28    | 0.28    |
| ErccD 2  | 0.30    | 0.30    | 0.30    |
| ErccD 3  | 0.39    | 0.39    | 0.39    |
| ErccD 4  | 0.37    | 0.37    | 0.37    |
| ErccD 5  | 0.45    | 0.45    | 0.45    |
| ErccD 6  | 0.40    | 0.40    | 0.40    |

Long-lived mice

NER progeroid mice

P<0.0001
