# Supplementary material for: Delayed and Accelerated Aging Share Common Longevity Assurance Mechanisms
Source: PubMed Central journal article supplement (PMC2493043; doi:10.1371/journal.pgen.1000161), 2008-08-15
Supplement: pgen.1000161.s005.pdf [file pgen.1000161.s005.pdf]

**Supplementary table S1. A list of all probe sets with significant transcriptional changes in the liver of *Csbm/m;Xpa/-* as compared to littermate controls FC: fold change, P: p-value**

| Independent Affymetrix platforms |              |             |                                                                                  | CSBm/m-XPA/- |       | CSBm/m |       | XPA/- |       |
|----------------------------------|--------------|-------------|----------------------------------------------------------------------------------|--------------|-------|--------|-------|-------|-------|
| 74code                           | 430code      | Gene Symbol | Gene Title                                                                       | FC           | P     | FC     | P     | FC    | P     |
| 100078_at                        | 1436504_x_at | ---         | ---                                                                              | 3.78         | 0.001 | -1.29  | 0.949 | 1.11  | 0.123 |
| 100491_at                        | 1418445_at   | ---         | ---                                                                              | -1.19        | 0.006 | 1.09   | 0.489 | 1.15  | 0.088 |
| 101363_at                        | 1460710_at   | ---         | ---                                                                              | -1.31        | 0.002 | -1.25  | 0.055 | -1.07 | 0.350 |
| 101471_at                        | 1438711_at   | ---         | ---                                                                              | -1.49        | 0.003 | -1.08  | 0.544 | -1.16 | 0.689 |
| 101647_at                        | 1421767_at   | ---         | ---                                                                              | -1.59        | 0.008 | -1.1   | 0.505 | -1.2  | 0.260 |
| 101930_at                        | 1436364_x_at | ---         | ---                                                                              | -1.31        | 0.007 | -1.18  | 0.170 | -1.18 | 0.110 |
| 102195_at                        | 1448050_s_at | ---         | ---                                                                              | 2.88         | 0.004 | 1.47   | 0.323 | 1.62  | 0.205 |
| 102353_at                        | 1450678_at   | ---         | ---                                                                              | 1.72         | 0.010 | 1.31   | 0.302 | 1.3   | 0.387 |
| 104069_at                        | 1460677_at   | ---         | ---                                                                              | 1.46         | 0.007 | 1.12   | 0.481 | -1    | 0.656 |
| 104213_at                        | 1451548_at   | ---         | ---                                                                              | -2.26        | 0.003 | -1.04  | 0.623 | -1.14 | 0.196 |
| 104533_at                        | 1435458_at   | ---         | ---                                                                              | 1.76         | 0.005 | 1.17   | 0.269 | 1.09  | 0.538 |
| 160173_at                        | 1436713_s_at | ---         | ---                                                                              | 4.15         | 0.001 | 1.29   | 0.142 | -1.06 | 0.582 |
| 160375_at                        | 1449434_at   | ---         | ---                                                                              | -1.63        | 0.005 | 1.17   | 0.252 | 1.22  | 0.195 |
| 160489_at                        | 1438855_x_at | ---         | ---                                                                              | 2.32         | 0.005 | 1.47   | 0.048 | 1.33  | 0.016 |
| 93283_at                         | 1451703_s_at | ---         | ---                                                                              | 1.57         | 0.002 | -1.08  | 0.252 | -1.05 | 0.610 |
| 93351_at                         | 1419905_s_at | ---         | ---                                                                              | -1.26        | 0.001 | 1.07   | 0.214 | 1.28  | 0.276 |
| 94535_at                         | 1450054_at   | ---         | ---                                                                              | 1.21         | 0.003 | 1.09   | 0.245 | 1.07  | 0.218 |
| 94769_at                         | 1449366_at   | ---         | ---                                                                              | 1.28         | 0.001 | -1.07  | 0.503 | -1.01 | 0.173 |
| 95291_r_at                       | 1419846_at   | ---         | ---                                                                              | -2.14        | 0.004 | -1.44  | 0.009 | -2.19 | 0.005 |
| 95505_at                         | 1448848_at   | ---         | ---                                                                              | 1.18         | 0.005 | -1.09  | 0.460 | -1.03 | 0.087 |
| 97867_at                         | 1449038_at   | ---         | ---                                                                              | -1.23        | 0.001 | 1.01   | 0.695 | 1.08  | 0.301 |
| 98540_g_at                       | 1437039_at   | ---         | ---                                                                              | 1.12         | 0.007 | -1.07  | 0.811 | -1.05 | 0.713 |
| 98951_at                         | 1437205_at   | ---         | ---                                                                              | -1.17        | 0.007 | -1.8   | 0.199 | -1.43 | 0.577 |
| 160807_at                        | 1450504_a_at | Agpat3      | 1-acylglycerol-3-phosphate O-acyltransferase 3                                   | 1.08         | 0.002 | -1.13  | 0.037 | -1.18 | 0.003 |
| 160711_at                        | 1419367_at   | Decr1       | 2,4-dienoyl CoA reductase 1, mitochondrial                                       | 1.19         | 0.009 | 1.01   | 0.875 | 1.06  | 0.450 |
| 97279_at                         | 1435967_s_at | Hibadh      | 3-hydroxyisobutyrate dehydrogenase                                               | -1.29        | 0.007 | -1.06  | 0.430 | -1.09 | 0.895 |
| 103939_at                        | 1451512_s_at | Hibch       | 3-hydroxyisobutyryl-Coenzyme A hydrolase                                         | -1.23        | 0.004 | -1.09  | 0.047 | 1.04  | 0.577 |
| 102259_at                        | 1420816_at   | Ywhag       | 3-monooxygenase/tryptophan 5-monooxygenase activation protein, gamma polypeptide | -1.42        | 0.004 | -1.22  | 0.138 | -1.32 | 0.017 |
| 96713_at                         | 1434510_at   | Papss2      | 3'-phosphoadenosine 5'-phosphosulfate synthase 2                                 | -1.2         | 0.007 | 1.03   | 0.876 | -1.06 | 0.143 |
| 93464_at                         | 1455151_at   | Akap9       | A kinase (PRKA) anchor protein (yotiao) 9                                        | -1.89        | 0.007 | -3.11  | 0.008 | -2.24 | 0.098 |
| 96744_at                         | 1448445_at   | Acp6        | acid phosphatase 6, lysophosphatidic                                             | -1.25        | 0.005 | -1.07  | 0.123 | 1.13  | 0.170 |
| 101213_at                        | 1419441_at   | Arbp        | acidic ribosomal phosphoprotein P0                                               | 1.11         | 0.001 | -1.06  | 0.276 | 1.02  | 0.028 |
| 100147_at                        | 1423644_at   | Aco1        | aconitase 1                                                                      | -1.29        | 0.001 | -1.02  | 0.749 | 1.04  | 0.567 |
| 93288_at                         | 1437148_at   | Arpc2       | actin related protein 2/3 complex, subunit 2                                     | 1.37         | 0.004 | -1.01  | 0.846 | -1.08 | 0.302 |
| 95434_at                         | 1448279_at   | Arpc3       | actin related protein 2/3 complex, subunit 3                                     | 1.16         | 0.009 | -1.31  | 0.125 | -1.71 | 0.031 |
| 160762_at                        | 1433477_at   | Abr         | active BCR-related gene                                                          | 1.84         | 0.000 | 1.37   | 0.072 | 1.62  | 0.031 |
| 98976_at                         | 1419476_at   | Adamdec1    | ADAM-like, decysin 1                                                             | 1.43         | 0.005 | 1.43   | 0.050 | 1.47  | 0.001 |
| 97526_at                         | 1448308_at   | Ap3m1       | adaptor-related protein complex 3, mu 1 subunit                                  | -1.51        | 0.005 | 1.07   | 0.037 | -1.22 | 0.001 |
| 104261_at                        | 1435077_at   | Asxl1       | additional sex combs like 1 (Drosophila)                                         | 1.21         | 0.006 | 1.02   | 0.337 | -1.03 | 0.979 |
| 93512_f_at                       | 1438292_x_at | Adk         | adenosine kinase                                                                 | -1.22        | 0.005 | -1.07  | 0.731 | -1.16 | 0.042 |
| 103392_at                        | 1456307_s_at | Adcy7       | Adenylate cyclase 7                                                              | 1.72         | 0.001 | 1.41   | 0.088 | 1.36  | 0.025 |
| 104605_at                        | 1434329_s_at | Adipor2     | adiponectin receptor 2                                                           | -1.37        | 0.007 | 1.04   | 0.161 | 1.06  | 0.122 |
| 98589_at                         | 1448318_at   | Adfp        | adipose differentiation related protein                                          | 1.41         | 0.001 | 1.2    | 0.115 | 1.28  | 0.010 |
| 98084_at                         | 1417112_at   | Arl2bp      | ADP-ribosylation factor-like 2 binding protein                                   | 1.41         | 0.000 | -1.24  | 0.006 | -1.17 | 0.191 |
| 99993_at                         | 1421424_a_at | Anpep       | alanyl (membrane) aminopeptidase                                                 | -1.64        | 0.002 | -1.02  | 0.676 | -1.17 | 0.364 |
| 97450_s_at                       | 1460167_at   | Aldh7a1     | aldehyde dehydrogenase family 7, member A1                                       | -1.14        | 0.006 | 1.04   | 0.198 | 1.12  | 0.028 |
| 93781_at                         | 1416460_at   | Aldrl6      | aldehyde reductase (aldose reductase)-like 6                                     | 1.97         | 0.002 | 1.23   | 0.983 | 1.31  | 0.686 |

|             |              |             |                                                                                |       |       |       |       |       |       |
|-------------|--------------|-------------|--------------------------------------------------------------------------------|-------|-------|-------|-------|-------|-------|
| 102826_at   | 1423556_at   | Akr1b7      | aldo-keto reductase family 1, member B7                                        | 6.45  | 0.002 | -1.18 | 0.192 | 1.24  | 0.812 |
| 160215_at   | 1420619_a_at | Aes         | amino-terminal enhancer of split                                               | -1.63 | 0.009 | -1.03 | 0.961 | -1.02 | 0.782 |
| 94954_at    | 1423931_s_at | Anapc4      | anaphase promoting complex subunit 4                                           | 1.57  | 0.000 | 1.27  | 0.145 | 1.23  | 0.190 |
| 100569_at   | 1419091_a_at | Anxa2       | annexin A2                                                                     | 1.8   | 0.004 | 1.27  | 0.131 | 1.34  | 0.002 |
| 96529_at    | 1457695_at   | Ap1gbp1     | AP1 gamma subunit binding protein 1                                            | -2.22 | 0.009 | -1.72 | 0.056 | -1.46 | 0.205 |
| 97887_at    | 1418069_at   | Apoc2       | apolipoprotein C-II                                                            | 1.24  | 0.008 | 1.03  | 0.350 | 1.05  | 0.220 |
| 93840_at    | 1419096_at   | Apom        | apolipoprotein M                                                               | 1.24  | 0.001 | 1.08  | 0.608 | -1.02 | 0.085 |
| 93559_at    | 1416135_at   | Apex1       | apurinic/apyrimidinic endonuclease 1                                           | 1.12  | 0.008 | 1.06  | 0.211 | 1.01  | 0.953 |
| 104328_at   | 1424011_at   | Aqp9        | aquaporin 9                                                                    | 1.22  | 0.003 | 1     | 0.408 | 1.05  | 0.515 |
| 97130_at    | 1420651_at   | Ate1        | arginine-tRNA-protein transferase 1                                            | -1.3  | 0.007 | -1.07 | 0.116 | -1.07 | 0.029 |
| 95563_at    | 1427188_at   | Arih1       | ariadne ubiquitin-conjugating enzyme E2 binding protein homolog 1 (Drosophila) | -1.21 | 0.008 | -1.36 | 0.002 | -1.18 | 0.022 |
| 160666_at   | 1428502_at   | Actr6       | ARP6 actin-related protein 6 homolog (yeast)                                   | -1.38 | 0.000 | -1.07 | 0.565 | -1.07 | 0.106 |
| 95439_at    | 1448813_at   | Aadac       | arylacetamide deacetylase (esterase)                                           | -1.05 | 0.007 | 1.13  | 0.237 | 1.16  | 0.241 |
| 95133_at    | 1451095_at   | Asns        | asparagine synthetase                                                          | 2.73  | 0.001 | 1.3   | 0.398 | 1.28  | 0.103 |
| 95725_at    | 1448539_a_at | Acy3        | aspartoacylase (aminoacylase) 3                                                | -1.3  | 0.005 | -1.02 | 0.995 | 1.04  | 0.442 |
| 103899_at   | 1456388_at   | Atp11a      | ATPase, class VI, type 11A                                                     | 1.48  | 0.006 | 1.28  | 0.108 | 1.03  | 0.719 |
| 96281_at    | 1423256_a_at | Atp6v1g1    | ATPase, H+ transporting, V1 subunit G isoform 1                                | 1.14  | 0.000 | -1.04 | 0.029 | -1.03 | 0.020 |
| 94733_at    | 1449818_at   | Abcb4       | ATP-binding cassette, sub-family B (MDR/TAP), member 4                         | 1.15  | 0.002 | -1.03 | 0.393 | -1.04 | 0.475 |
| 103689_at   | 1428988_at   | Abcc3       | ATP-binding cassette, sub-family C (CFTR/MRP), member 3                        | 1.55  | 0.001 | -1.13 | 0.477 | -1.12 | 0.549 |
| 93045_at    | 1416679_at   | Abcd3       | ATP-binding cassette, sub-family D (ALD), member 3                             | -1.24 | 0.000 | 1.01  | 0.762 | 1.03  | 0.623 |
| 160612_at   | 1423570_at   | Abcg1       | ATP-binding cassette, sub-family G (WHITE), member 1                           | 1.33  | 0.004 | 1.19  | 0.015 | -1.09 | 0.686 |
| 93626_at    | 1422906_at   | Abcg2       | ATP-binding cassette, sub-family G (WHITE), member 2                           | 1.32  | 0.008 | 1.04  | 0.087 | 1.05  | 0.191 |
| 102943_at   | 1428612_at   | Appg7l      | autophagy 7-like (S. cerevisiae)                                               | -1.48 | 0.007 | -1.11 | 0.450 | -1.01 | 0.886 |
| 103091_at   | 1417856_at   | Relb        | avian reticuloendotheliosis viral (v-rel) oncogene related B                   | 1.86  | 0.005 | -1.16 | 0.454 | 1.2   | 0.126 |
| 160876_at   | 1417077_at   | Bcap29      | B-cell receptor-associated protein 29                                          | 1.34  | 0.003 | 1.03  | 0.295 | 1.18  | 0.378 |
| 96146_at    | 1449007_at   | Btg3        | B-cell translocation gene 3                                                    | 1.73  | 0.000 | 1.12  | 0.425 | 1.01  | 0.441 |
| 161129_r_at | 1423948_at   | Bag2        | Bcl2-associated athanogene 2                                                   | -1.48 | 0.003 | -1.08 | 0.528 | -1.07 | 0.649 |
| 100988_at   | 1435448_at   | Bcl2l11     | BCL2-like 11 (apoptosis facilitator)                                           | 1.72  | 0.001 | 1.03  | 0.443 | -1.11 | 0.778 |
| 94363_at    | 1433636_at   | Bms1l       | BMS1-like, ribosome assembly protein (yeast)                                   | 1.42  | 0.001 | 1.14  | 0.037 | -1.02 | 0.728 |
| 97489_at    | 1433504_at   | Pygb        | brain glycogen phosphorylase                                                   | 1.72  | 0.008 | 1.04  | 0.415 | 1.07  | 0.618 |
| 103636_at   | 1418746_at   | MGI:1930773 | brain protein 17                                                               | -2.61 | 0.000 | 1.01  | 0.470 | 1.05  | 0.368 |
| 92381_at    | 1420975_at   | Baz1b       | bromodomain adjacent to zinc finger domain, 1B                                 | -1.32 | 0.001 | -1.08 | 0.166 | 1.09  | 0.364 |
| 102852_at   | 1418815_at   | Cdh2        | cadherin 2                                                                     | -1.37 | 0.004 | -1.22 | 0.436 | -1.35 | 0.089 |
| 96203_at    | 1424713_at   | Calml4      | calmodulin-like 4                                                              | 1.88  | 0.000 | -1.24 | 0.977 | -1.14 | 0.452 |
| 97943_at    | 1450429_at   | Capn6       | calpain 6                                                                      | 1.47  | 0.002 | 1.15  | 0.393 | -1.19 | 0.049 |
| 93523_at    | 1456170_x_at | Calr        | calreticulin                                                                   | -1.26 | 0.009 | -1.02 | 0.326 | -1.14 | 0.075 |
| 92835_at    | 1418013_at   | Cml1        | camello-like 1                                                                 | -3.24 | 0.002 | -1.02 | 0.641 | 1.43  | 0.030 |
| 102672_g_at | 1452529_a_at | Creb1       | cAMP responsive element binding protein 1                                      | -1.38 | 0.005 | 1.05  | 0.607 | -1.16 | 0.304 |
| 97259_at    | 1422608_at   | Arpp19      | cAMP-regulated phosphoprotein 19                                               | 1.31  | 0.010 | 1     | 0.517 | -1.01 | 0.487 |
| 98127_at    | 1423057_at   | Capza2      | capping protein (actin filament) muscle Z-line, alpha 2                        | 1.19  | 0.001 | 1.07  | 0.098 | 1.04  | 0.208 |
| 160106_at   | 1450355_a_at | Capg        | capping protein (actin filament), gelsolin-like                                | 1.62  | 0.001 | 1.32  | 0.009 | 1.13  | 0.157 |
| 93824_at    | 1455540_at   | Cps1        | carbamoyl-phosphate synthetase 1                                               | -1.08 | 0.007 | 1     | 0.039 | 1.02  | 0.138 |
| 98079_at    | 1450725_s_at | Car14       | carbonic anhydrase 14                                                          | -1.76 | 0.000 | 1.06  | 0.549 | 1.39  | 0.225 |
| 98137_at    | 1419525_at   | Car5a       | carbonic anhydrase 5a, mitochondrial                                           | -3.11 | 0.001 | -1.34 | 0.876 | -1.38 | 0.588 |
| 161042_at   | 1427912_at   | Cbr3        | carbonyl reductase 3                                                           | 1.98  | 0.003 | 1.33  | 0.286 | 1.03  | 0.654 |
| 103882_at   | 1417745_at   | Cpn1        | carboxypeptidase N, polypeptide 1                                              | 1.22  | 0.001 | 1.04  | 0.517 | 1.04  | 0.482 |
| 93076_at    | 1428537_at   | Csnk1a1     | casein kinase 1, alpha 1                                                       | 1.08  | 0.007 | -1.06 | 0.716 | -1.14 | 0.388 |
| 100291_at   | 1450457_at   | Cbl         | Casitas B-lineage lymphoma                                                     | -1.57 | 0.008 | -1.42 | 0.018 | -1.4  | 0.156 |
| 94458_at    | 1415995_at   | Casp6       | caspase 6                                                                      | 1.37  | 0.000 | -1.01 | 0.084 | 1.3   | 0.015 |
| 95608_at    | 1417492_at   | Ctsb        | cathepsin B                                                                    | 1.46  | 0.001 | 1.32  | 0.100 | 1.41  | 0.020 |
| 98254_f_at  | 1455316_x_at | Ccrn4l      | CCR4 carbon catabolite repression 4-like (S. cerevisiae)                       | 1.52  | 0.005 | 1.37  | 0.104 | 1.35  | 0.049 |
| 95373_at    | 1418770_at   | Cd2         | CD2 antigen                                                                    | 2.28  | 0.001 | 1.59  | 0.017 | 1.88  | 0.003 |
| 104023_at   | 1428018_a_at | Cd300c      | Cd300C antigen                                                                 | 1.57  | 0.005 | 1.25  | 0.387 | 1.48  | 0.032 |

|             |              |                  |                                                                                                     |       |       |       |       |       |       |
|-------------|--------------|------------------|-----------------------------------------------------------------------------------------------------|-------|-------|-------|-------|-------|-------|
| 103611_at   | 1419554_at   | Cd47             | CD47 antigen (Rh-related antigen, integrin-associated signal transducer)                            | 1.47  | 0.006 | 1.36  | 0.080 | 1.15  | 0.507 |
| 93445_at    | 1449193_at   | Cd5l             | CD5 antigen-like                                                                                    | 2.01  | 0.009 | 1.68  | 0.085 | 1.33  | 0.436 |
| 95661_at    | 1416066_at   | Cd9              | CD9 antigen                                                                                         | 1.95  | 0.000 | -1.16 | 0.180 | -1.11 | 0.510 |
| 95920_at    | 1448048_at   | BC016495         | cDNA sequence BC016495                                                                              | -1.71 | 0.004 | -1.1  | 0.596 | -1.24 | 0.105 |
| 160815_at   | 1456014_s_at | BC032204         | cDNA sequence BC032204                                                                              | 1.78  | 0.004 | 1.33  | 0.172 | 1.27  | 0.299 |
| 97179_at    | 1460713_at   | BC048355         | CDNA sequence BC048355                                                                              | -1.65 | 0.002 | 1.02  | 0.978 | -1.07 | 0.450 |
| 98516_at    | 1424117_at   | BC056474         | cDNA sequence BC056474                                                                              | -1.4  | 0.009 | -1.05 | 0.636 | 1.02  | 0.658 |
| 99237_at    | 1450362_at   | U55872           | cDNA sequence U55872                                                                                | -1.87 | 0.007 | -1.05 | 0.124 | 1.51  | 0.995 |
| 102806_g_at | 1425675_s_at | Ceacam1          | CEA-related cell adhesion molecule 1                                                                | -1.63 | 0.003 | -1.01 | 0.071 | 1.18  | 0.880 |
| 102804_at   | 1460681_at   | Ceacam2          | CEA-related cell adhesion molecule 2                                                                | -1.31 | 0.000 | 1.07  | 0.841 | 1.17  | 0.306 |
| 94105_at    | 1460708_s_at | Cdc42            | cell division cycle 42 homolog (S. cerevisiae)                                                      | 1.25  | 0.002 | 1.08  | 0.984 | 1.03  | 0.303 |
| 160699_at   | 1448466_at   | Cdca5            | cell division cycle associated 5                                                                    | -1.41 | 0.004 | 1.04  | 0.678 | -1.1  | 0.228 |
| 102659_at   | 1417551_at   | Cln3             | ceroid lipofuscinosis, neuronal 3, juvenile (Batten, Spielmeyer-Vogt disease)                       | 1.19  | 0.000 | 1.26  | 0.004 | 1.15  | 0.005 |
| 103012_at   | 1419426_s_at | Ccl21b /// Ccl21 | chemokine (C-C motif) ligand 21b (serine) /// chemokine (C-C motif) ligand 21a (leucine) /// chemol | -1.8  | 0.006 | 1.31  | 0.607 | 1.27  | 0.557 |
| 162198_f_at | 1420249_s_at | Ccl6             | chemokine (C-C motif) ligand 6                                                                      | 1.74  | 0.003 | 1.17  | 0.384 | 1.12  | 0.549 |
| 104443_at   | 1423466_at   | Ccr7             | chemokine (C-C motif) receptor 7                                                                    | 1.82  | 0.007 | 1.27  | 0.323 | 1.75  | 0.215 |
| 92481_at    | 1422747_at   | Chek2            | CHK2 checkpoint homolog (S. pombe)                                                                  | -1.29 | 0.003 | 1.09  | 0.558 | -1.08 | 0.148 |
| 104059_at   | 1437297_at   | Chd8             | chromodomain helicase DNA binding protein 8                                                         | 1.06  | 0.004 | -1.3  | 0.178 | -1.15 | 0.373 |
| 100580_at   | 1421062_s_at | Chta             | clathrin, light polypeptide (Lca)                                                                   | 1.05  | 0.004 | -1    | 0.110 | -1.11 | 0.493 |
| 102915_at   | 1448931_at   | F2r1l            | coagulation factor II (thrombin) receptor-like 1                                                    | 2.88  | 0.003 | -1.48 | 0.399 | -1.19 | 0.590 |
| 96501_at    | 1418993_s_at | F10              | coagulation factor X                                                                                | 1.2   | 0.001 | -1.02 | 0.686 | 1.03  | 0.107 |
| 94410_f_at  | 1419803_s_at | Ccdc12           | coiled-coil domain containing 12                                                                    | 1.17  | 0.007 | 1.17  | 0.010 | 1.17  | 0.014 |
| 93284_at    | 1416332_at   | Cirbp            | cold inducible RNA binding protein                                                                  | 2.74  | 0.002 | -1.11 | 0.763 | 1.12  | 0.204 |
| 93547_at    | 1460716_a_at | Cbfb             | core binding factor beta                                                                            | -1.17 | 0.009 | -1.07 | 0.166 | -1.04 | 0.276 |
| 96648_at    | 1455269_a_at | Coro1a           | coronin, actin binding protein 1A                                                                   | 2.49  | 0.001 | 1.06  | 0.950 | 1.39  | 0.071 |
| 98107_at    | 1449660_s_at | Coro1c           | coronin, actin binding protein 1C                                                                   | 1.48  | 0.008 | 1.1   | 0.834 | 1.09  | 0.960 |
| 94054_at    | 1433908_a_at | Cttn             | cortactin                                                                                           | 1.39  | 0.006 | 1.14  | 0.117 | 1.04  | 0.924 |
| 95161_at    | 1451075_s_at | Ctdsp2           | CTD (carboxy-terminal domain, RNA polymerase II, polypeptide A) small phosphatase 2                 | 1.37  | 0.008 | -1.03 | 0.667 | -1.07 | 0.953 |
| 95951_at    | 1420804_s_at | Clec4d           | C-type lectin domain family 4, member d                                                             | 1.68  | 0.006 | 1.12  | 0.548 | -1.24 | 0.650 |
| 99179_at    | 1431145_a_at | Cuedc2           | CUE domain containing 2                                                                             | 1.48  | 0.002 | 1.19  | 0.160 | 1.18  | 0.120 |
| 93630_at    | 1425932_a_at | Cugbp1           | CUG triplet repeat, RNA binding protein 1                                                           | -1.5  | 0.008 | -1.29 | 0.042 | -1.32 | 0.009 |
| 100444_at   | 1450674_at   | Cdk5             | cyclin-dependent kinase 5                                                                           | -1.12 | 0.006 | 1.08  | 0.384 | 1.21  | 0.229 |
| 100278_at   | 1419497_at   | Cdkn1b           | cyclin-dependent kinase inhibitor 1B (P27)                                                          | -1.55 | 0.002 | -1.08 | 0.128 | -1.28 | 0.079 |
| 160330_at   | 1460645_at   | Chordc1          | cysteine and histidine-rich domain (CHORD)-containing, zinc-binding protein 1                       | -1.29 | 0.003 | -1.03 | 0.491 | -1.02 | 0.272 |
| 103391_at   | 1455991_at   | Ccbl2            | cysteine conjugate-beta lyase 2                                                                     | 1.52  | 0.005 | -1    | 0.747 | 1.04  | 0.869 |
| 96346_at    | 1448842_at   | Cdo1             | cysteine dioxygenase 1, cytosolic                                                                   | -1.28 | 0.005 | -1.07 | 0.553 | -1.07 | 0.259 |
| 99184_at    | 1427981_a_at | Csad             | cysteine sulfinic acid decarboxylase                                                                | 2.36  | 0.002 | -1.28 | 0.279 | -1.25 | 0.349 |
| 160652_at   | 1448111_at   | Ctps2            | cytidine 5'-triphosphate synthase 2                                                                 | 1.82  | 0.001 | 1.05  | 0.958 | 1.08  | 0.523 |
| 100059_at   | 1454268_a_at | Cyba             | cytochrome b-245, alpha polypeptide                                                                 | 1.93  | 0.004 | 1.5   | 0.122 | 1.49  | 0.104 |
| 100965_at   | 1455167_at   | Cox8c            | cytochrome c oxidase, subunit VIIIc                                                                 | -1.36 | 0.001 | -1.18 | 0.173 | -1.24 | 0.011 |
| 96228_at    | 1448804_at   | Cyp11a1          | cytochrome P450, family 11, subfamily a, polypeptide 1                                              | 1.52  | 0.003 | -1.07 | 0.756 | 9.11  | 0.083 |
| 103670_at   | 1418821_at   | Cyp2a12          | cytochrome P450, family 2, subfamily a, polypeptide 12                                              | -1.38 | 0.000 | -1.04 | 0.353 | 1.06  | 0.124 |
| 102701_at   | 1425645_s_at | Cyp2b10          | cytochrome P450, family 2, subfamily b, polypeptide 10                                              | -3.09 | 0.001 | -1.46 | 0.308 | -1.34 | 0.808 |
| 102820_at   | 1449479_at   | Cyp2b13          | cytochrome P450, family 2, subfamily b, polypeptide 13                                              | -2.33 | 0.005 | -1.29 | 0.930 | -1.22 | 0.834 |
| 101862_at   | 1419590_at   | Cyp2b9           | cytochrome P450, family 2, subfamily b, polypeptide 9                                               | -1.56 | 0.000 | -1.04 | 0.583 | -1.06 | 0.879 |
| 93585_at    | 1417651_at   | Cyp2c29          | cytochrome P450, family 2, subfamily c, polypeptide 29                                              | -1.45 | 0.007 | -1.33 | 0.086 | -1.29 | 0.132 |
| 95043_at    | 1424273_at   | Cyp2c70          | cytochrome P450, family 2, subfamily c, polypeptide 70                                              | -1.48 | 0.003 | -1.12 | 0.993 | -1.03 | 0.021 |
| 162174_at   | 1419349_a_at | Cyp2d9           | cytochrome P450, family 2, subfamily d, polypeptide 9                                               | 1.76  | 0.006 | 1.02  | 0.880 | 1.18  | 0.419 |
| 100069_at   | 1448792_a_at | Cyp2f2           | cytochrome P450, family 2, subfamily f, polypeptide 2                                               | -2.41 | 0.003 | 1.28  | 0.478 | 1.68  | 0.056 |
| 92814_at    | 1417532_at   | Cyp2j5           | cytochrome P450, family 2, subfamily j, polypeptide 5                                               | -3.29 | 0.000 | -1.34 | 0.357 | -1.52 | 0.090 |
| 103704_at   | 1435376_at   | Ddhd2            | DDHD domain containing 2                                                                            | 1.25  | 0.007 | -1.06 | 0.763 | 1.02  | 0.318 |
| 92226_at    | 1417875_at   | Ddx50            | DEAD (Asp-Glu-Ala-Asp) box polypeptide 50                                                           | 1.23  | 0.004 | 1.06  | 0.103 | 1     | 0.767 |
| 93965_r_at  | 1424598_at   | Ddx6             | DEAD (Asp-Glu-Ala-Asp) box polypeptide 6                                                            | -2.68 | 0.010 | -2.42 | 0.038 | -1.93 | 0.195 |

|             |              |                   |                                                                                                    |       |       |       |       |       |       |
|-------------|--------------|-------------------|----------------------------------------------------------------------------------------------------|-------|-------|-------|-------|-------|-------|
| 96008_at    | 1418528_a_at | Dad1              | defender against cell death 1                                                                      | 1.13  | 0.000 | -1.05 | 0.612 | -1.09 | 0.893 |
| 100882_at   | 1419492_s_at | Defb1             | defensin beta 1                                                                                    | 1.52  | 0.003 | 1.12  | 0.315 | 1.17  | 0.539 |
| 102370_at   | 1434642_at   | Dhrs8             | dehydrogenase/reductase (SDR family) member 8                                                      | 1.22  | 0.001 | -1.27 | 0.120 | -1.33 | 0.048 |
| 95552_at    | 1417991_at   | Dio1              | deiodinase, iodothyronine, type I                                                                  | -2.15 | 0.002 | -1.03 | 0.330 | -1.01 | 0.333 |
| 96115_at    | 1438001_x_at | Dp1               | deleted in polyposis 1                                                                             | 1.65  | 0.001 | 1.23  | 0.147 | 1.18  | 0.461 |
| 160769_at   | 1448438_at   | Der12             | Der1-like domain family, member 2                                                                  | -1.14 | 0.010 | 1.11  | 0.921 | 1.13  | 0.904 |
| 96742_at    | 1418511_at   | Dpt               | dermatopontin                                                                                      | -1.24 | 0.009 | 1.05  | 0.643 | -1.02 | 0.180 |
| 97768_at    | 1421156_a_at | Dsc2              | desmocollin 2                                                                                      | -1.33 | 0.003 | 1.06  | 0.528 | 1.2   | 0.312 |
| 97248_at    | 1422432_at   | Dbi               | diazepam binding inhibitor                                                                         | 1.65  | 0.005 | 1.33  | 0.235 | 1.29  | 0.373 |
| 160490_at   | 1415853_at   | Def8              | differentially expressed in FDCP 8                                                                 | -1.57 | 0.008 | -1.02 | 0.469 | -1.22 | 0.085 |
| 94956_at    | 1452434_s_at | Dgcr6             | DiGeorge syndrome critical region gene 6                                                           | -1.55 | 0.003 | -1.26 | 0.092 | 1.08  | 0.073 |
| 98966_at    | 1449118_at   | Dbt               | dihydroliipoamide branched chain transacylase E2                                                   | -1.27 | 0.008 | -1.4  | 0.058 | -1.39 | 0.015 |
| 92887_at    | 1416457_at   | Ddah2             | dimethylarginine dimethylaminohydrolase 2                                                          | 1.26  | 0.008 | 1.21  | 0.063 | 1     | 0.499 |
| 96757_at    | 1449000_at   | D10Jhu81e         | DNA segment, Chr 10, Johns Hopkins University 81 expressed                                         | -1.73 | 0.004 | -1.53 | 0.105 | -1.51 | 0.034 |
| 93232_at    | 1435259_s_at | D2Ert217e         | DNA segment, Chr 2, ERATO Doi 217, expressed                                                       | 1.18  | 0.005 | -1.18 | 0.325 | -1.19 | 0.272 |
| 95934_at    | 1445485_at   | D7Ert187e         | DNA segment, Chr 7, ERATO Doi 187, expressed                                                       | -2.76 | 0.004 | -1.72 | 0.052 | 1.09  | 0.613 |
| 93529_at    | 1419041_at   | D8Wsu49e          | DNA segment, Chr 8, Wayne State University 49, expressed                                           | -1.22 | 0.001 | -1.07 | 0.309 | 1.05  | 0.083 |
| 95613_at    | 1448339_at   | D9Wsu20e          | DNA segment, Chr 9, Wayne State University 20, expressed                                           | -1.41 | 0.009 | -1.09 | 0.081 | -1.08 | 0.038 |
| 160522_at   | 1450839_at   | D0H4S114          | DNA segment, human D4S114                                                                          | -1.71 | 0.001 | 1.2   | 0.067 | 1.27  | 0.087 |
| 97261_at    | 1460179_at   | Dnaja1            | DnaJ (Hsp40) homolog, subfamily A, member 1                                                        | -1.26 | 0.000 | -1.06 | 0.544 | -1.03 | 0.753 |
| 94343_at    | 1433887_at   | Dnajc3            | DnaJ (Hsp40) homolog, subfamily C, member 3                                                        | -1.29 | 0.005 | -1.09 | 0.586 | -1.4  | 0.012 |
| 95700_r_at  | 1452683_at   | Dnajc8            | DnaJ (Hsp40) homolog, subfamily C, member 8                                                        | 1.19  | 0.009 | 1.15  | 0.053 | 1.18  | 0.016 |
| 97428_at    | 1423116_at   | Dom3z             | DOM-3 homolog Z (C. elegans)                                                                       | 1.17  | 0.006 | -1.05 | 0.308 | 1.08  | 0.154 |
| 97755_at    | 1422830_s_at | Drd4              | dopamine receptor 4                                                                                | 1.38  | 0.005 | -1.03 | 0.642 | -1.04 | 0.626 |
| 102374_at   | 1434027_at   | Dscr1l2           | Down syndrome critical region gene 1-like 2                                                        | 1.47  | 0.001 | 1.26  | 0.036 | 1.15  | 0.118 |
| 160327_at   | 1448368_at   | Dctn6             | dynactin 6                                                                                         | 1.17  | 0.009 | 1.06  | 0.183 | 1.09  | 0.150 |
| 101109_at   | 1426778_at   | Dag1              | dystroglycan 1                                                                                     | -1.15 | 0.010 | 1.03  | 0.606 | 1.01  | 0.825 |
| 104174_at   | 1459546_s_at | Enpp1             | ectonucleotide pyrophosphatase/phosphodiesterase 1                                                 | -1.33 | 0.002 | -1.13 | 0.191 | -1.08 | 0.328 |
| 95468_at    | 1423785_at   | Egln1             | EGL nine homolog 1 (C. elegans)                                                                    | -1.14 | 0.008 | 1.03  | 0.239 | 1.02  | 0.315 |
| 160667_at   | 1434920_a_at | Evl               | Ena-vasodilator stimulated phosphoprotein 2                                                        | 2     | 0.005 | 1.54  | 0.199 | 1.46  | 0.206 |
| 102698_at   | 1449888_at   | Epas1             | endothelial PAS domain protein 1                                                                   | -1.52 | 0.009 | -1.08 | 0.473 | 1.01  | 0.915 |
| 93754_at    | 1448491_at   | Ech1              | enoyl coenzyme A hydratase 1, peroxisomal                                                          | 1.27  | 0.003 | 1.01  | 0.288 | 1.03  | 0.872 |
| 103240_f_at | 1422411_s_at | Ear1 /// Ear2 /// | eosinophil-associated, ribonuclease A family, member 1 /// eosinophil-associated, ribonuclease A f | 2.19  | 0.008 | 1.87  | 0.113 | 1.71  | 0.026 |
| 103980_at   | 1421151_a_at | Epha2             | Eph receptor A2                                                                                    | -1.57 | 0.000 | 1.15  | 0.089 | 1.1   | 0.281 |
| 94125_at    | 1416237_at   | Eva1              | epithelial V-like antigen 1                                                                        | -1.51 | 0.002 | -1.01 | 0.123 | 1.05  | 0.411 |
| 101587_at   | 1422438_at   | Ephx1             | epoxide hydrolase 1, microsomal                                                                    | 2.12  | 0.004 | -1.14 | 0.011 | 1.13  | 0.355 |
| 93608_at    | 1449222_at   | Eb13              | Epstein-Barr virus induced gene 3                                                                  | 2.27  | 0.003 | 1.73  | 0.139 | 1.65  | 0.081 |
| 104065_at   | 1424065_at   | Edem1             | ER degradation enhancer, mannosidase alpha-like 1                                                  | -1.37 | 0.000 | -1.06 | 0.467 | -1.03 | 0.341 |
| 101500_at   | 1433490_s_at | Epb4.1l2          | erythrocyte protein band 4.1-like 2                                                                | 1.34  | 0.001 | 1.28  | 0.117 | 1.19  | 0.097 |
| 99941_at    | 1451600_s_at | LOC13909 /// E    | esterase 31-like /// esterase 31                                                                   | -3.57 | 0.005 | 1.26  | 0.314 | 1.44  | 0.061 |
| 93945_at    | 1421244_at   | Esr1              | estrogen receptor 1 (alpha)                                                                        | -1.47 | 0.006 | -1.45 | 0.041 | -1.06 | 0.057 |
| 160129_at   | 1449506_a_at | Eef1d             | eukaryotic translation elongation factor 1 delta (guanine nucleotide exchange protein)             | 1.08  | 0.005 | -1.22 | 0.293 | -1.2  | 0.268 |
| 96883_at    | 1417718_at   | Eif3s4            | eukaryotic translation initiation factor 3, subunit 4 (delta)                                      | 1.23  | 0.000 | -1.04 | 0.765 | -1.08 | 0.361 |
| 99101_at    | 1416100_at   | Eif3s7            | eukaryotic translation initiation factor 3, subunit 7 (zeta)                                       | 1.1   | 0.010 | -1.06 | 0.611 | -1.07 | 0.582 |
| 101072_at   | 1437733_at   | Eif4ebp2          | Eukaryotic translation initiation factor 4E binding protein 2                                      | -2.43 | 0.008 | -1.14 | 0.551 | -1.39 | 0.436 |
| 160265_at   | 1415723_at   | Eif5              | eukaryotic translation initiation factor 5                                                         | 1.23  | 0.008 | 1.08  | 0.323 | -1    | 0.881 |
| 96755_at    | 1424013_at   | Etf1              | eukaryotic translation termination factor 1                                                        | 1.19  | 0.003 | -1.02 | 0.825 | 1.08  | 0.176 |
| 92625_at    | 1448808_a_at | Nme2              | expressed in non-metastatic cells 2, protein                                                       | 1.14  | 0.007 | -1.01 | 0.411 | 1.06  | 0.028 |
| 97918_at    | 1427243_at   | AA536743          | expressed sequence AA536743                                                                        | 1.71  | 0.003 | 1.18  | 0.636 | 1.16  | 0.875 |
| 95577_at    | 1452122_at   | AI314180          | expressed sequence AI314180                                                                        | -1.24 | 0.001 | -1.12 | 0.077 | -1.02 | 0.527 |
| 161857_r_at | 1427176_s_at | AI428936          | expressed sequence AI428936                                                                        | 1.89  | 0.007 | 1.36  | 0.134 | 1.36  | 0.220 |
| 104034_at   | 1435417_at   | AI464131          | expressed sequence AI464131                                                                        | -1.72 | 0.010 | -1.09 | 0.879 | 1.16  | 0.257 |
| 93963_at    | 1436212_at   | AI661017          | expressed sequence AI661017                                                                        | 2.96  | 0.006 | 1.44  | 0.244 | 1.93  | 0.018 |

|             |              |                  |                                                                                     |        |       |       |       |       |       |
|-------------|--------------|------------------|-------------------------------------------------------------------------------------|--------|-------|-------|-------|-------|-------|
| 104260_at   | 1435326_at   | AW112037         | expressed sequence AW112037                                                         | 1.4    | 0.007 | 1.12  | 0.274 | 1.01  | 0.430 |
| 93747_at    | 1454698_at   | AW742319         | expressed sequence AW742319                                                         | 1.28   | 0.000 | 1.06  | 0.277 | 1.02  | 0.357 |
| 102135_at   | 1442211_at   | C78893           | expressed sequence C78893                                                           | 1.89   | 0.010 | -1.32 | 0.232 | 1.1   | 0.867 |
| 96367_at    | 1442494_at   | C79242           | expressed sequence C79242                                                           | -1.15  | 0.003 | -1.02 | 0.066 | -1.04 | 0.093 |
| 94689_at    | 1446148_x_at | C79248           | expressed sequence C79248                                                           | 1.24   | 0.003 | -1.91 | 0.101 | -2    | 0.085 |
| 103816_at   | 1424595_at   | F11r             | F11 receptor                                                                        | 1.21   | 0.008 | -1.01 | 0.862 | 1.12  | 0.055 |
| 160098_s_at | 1434370_s_at | Faf1             | Fas-associated factor 1                                                             | -1.35  | 0.008 | -1.11 | 0.100 | -1.06 | 0.209 |
| 160544_at   | 1416022_at   | Fabp5            | fatty acid binding protein 5, epidermal                                             | 2.39   | 0.000 | 1.38  | 0.633 | 1     | 0.158 |
| 104109_at   | 1452828_at   | Fbxo21           | F-box only protein 21                                                               | 1.36   | 0.003 | -1.01 | 0.332 | -1.1  | 0.506 |
| 92188_s_at  | 1452410_a_at | Fes              | feline sarcoma oncogene                                                             | 1.64   | 0.005 | 1.27  | 0.151 | 1.71  | 0.002 |
| 97949_at    | 1421855_at   | Fgl2             | fibrinogen-like protein 2                                                           | 1.87   | 0.004 | 1.38  | 0.054 | 1.21  | 0.171 |
| 97964_at    | 1417267_s_at | Fkbp11           | FK506 binding protein 11                                                            | 1.81   | 0.006 | 1.13  | 0.397 | 1.32  | 0.408 |
| 101991_at   | 1417429_at   | Fmo1             | flavin containing monooxygenase 1                                                   | -1.4   | 0.000 | -1    | 0.771 | 1.04  | 0.281 |
| 104421_at   | 1449525_at   | Fmo3             | flavin containing monooxygenase 3                                                   | -14.37 | 0.000 | -2.31 | 0.570 | -2    | 0.787 |
| 95095_at    | 1448559_at   | Flot1            | flotillin 1                                                                         | 1.46   | 0.010 | 1.08  | 0.512 | 1.01  | 0.924 |
| 160850_at   | 1460673_at   | Fpgs             | folylpolyglutamyl synthetase                                                        | -1.53  | 0.002 | 1.01  | 0.598 | 1.01  | 0.650 |
| 92958_at    | 1434832_at   | Foxo3a           | forkhead box O3a                                                                    | -1.69  | 0.006 | -1.19 | 0.485 | -1.36 | 0.055 |
| 99835_at    | 1417487_at   | Fosl1            | fos-like antigen 1                                                                  | -1.66  | 0.006 | -1.89 | 0.000 | -1.45 | 0.029 |
| 160226_at   | 1416570_s_at | Gfm1             | G elongation factor 1                                                               | -1.12  | 0.008 | 1.07  | 0.591 | 1.15  | 0.439 |
| 103332_at   | 1426782_at   | Gpr125           | G protein-coupled receptor 125                                                      | -1.24  | 0.001 | 1.05  | 0.543 | 1.16  | 0.157 |
| 94184_at    | 1451708_at   | Gpr33            | G protein-coupled receptor 33                                                       | 1.1    | 0.003 | 1.01  | 0.324 | -1.26 | 0.182 |
| 102787_at   | 1433485_x_at | Gpr56            | G protein-coupled receptor 56                                                       | 3.24   | 0.008 | 1.38  | 0.785 | 1.22  | 0.934 |
| 103270_at   | 1416969_at   | Gtse1            | G two S phase expressed protein 1                                                   | 2.42   | 0.006 | 1.99  | 0.175 | -1    | 0.907 |
| 97820_at    | 1417177_at   | Galk1            | galactokinase 1                                                                     | 1.41   | 0.008 | -1.12 | 0.114 | -1.08 | 0.331 |
| 99342_at    | 1449980_a_at | Gabrd            | gamma-aminobutyric acid (GABA-A) receptor, subunit delta                            | -1.52  | 0.009 | 1.04  | 0.213 | -1.26 | 0.103 |
| 102552_at   | 1422339_at   | Gja3             | gap junction membrane channel protein alpha 3                                       | -2.31  | 0.002 | -1.66 | 0.042 | -2.87 | 0.000 |
| 94697_at    | 1419526_at   | Fgr              | Gardner-Rasheed feline sarcoma viral (Fgr) oncogene homolog                         | 1.23   | 0.003 | 1.09  | 0.099 | -1.09 | 0.891 |
| 103667_at   | 1434513_at   | Gm542            | gene model 542, (NCBI)                                                              | -1.28  | 0.001 | -1.11 | 0.769 | -1.19 | 0.005 |
| 160225_at   | 1451135_at   | Gtf2b            | general transcription factor IIB                                                    | 1.28   | 0.005 | 1     | 0.080 | 1.07  | 0.840 |
| 99441_at    | 1426462_at   | Gphn             | gephyrin                                                                            | -1.41  | 0.009 | -1.1  | 0.907 | -1.18 | 0.200 |
| 102651_at   | 1425303_at   | Gck              | glucokinase                                                                         | -5.13  | 0.010 | -1.05 | 0.495 | -1.19 | 0.539 |
| 98931_at    | 1433546_at   | Gns              | glucosamine (N-acetyl)-6-sulfatase                                                  | 1.11   | 0.002 | 1.15  | 0.013 | 1.12  | 0.002 |
| 160194_at   | 1448717_at   | Gcdh             | glutaryl-Coenzyme A dehydrogenase                                                   | -1.32  | 0.010 | -1.1  | 0.115 | 1.05  | 0.592 |
| 160646_at   | 1421817_at   | Gsr              | glutathione reductase 1                                                             | 1.15   | 0.005 | -1.1  | 0.615 | -1.11 | 0.548 |
| 96670_at    | 1452823_at   | Gstk1            | glutathione S-transferase kappa 1                                                   | -1.67  | 0.005 | -1.09 | 0.294 | 1.07  | 0.022 |
| 101872_at   | 1421041_s_at | Gsta2            | glutathione S-transferase, alpha 2 (Yc2)                                            | 1.85   | 0.002 | -1.72 | 0.409 | -1.26 | 0.194 |
| 93009_at    | 1416411_at   | Gstm2            | glutathione S-transferase, mu 2                                                     | -1.36  | 0.007 | 1.05  | 0.909 | 1.3   | 0.223 |
| 100629_at   | 1416842_at   | Gstm5            | glutathione S-transferase, mu 5                                                     | 1.25   | 0.002 | -1.05 | 0.139 | 1.01  | 0.759 |
| 99583_at    | 1449575_a_at | Gstp1            | glutathione S-transferase, pi 1                                                     | 1.35   | 0.002 | 1.06  | 0.674 | 1.06  | 0.855 |
| 104603_at   | 1417883_at   | Gstt2            | glutathione S-transferase, theta 2                                                  | 2.78   | 0.002 | -1.34 | 0.038 | 1.16  | 0.178 |
| 95603_at    | 1416049_at   | Gldc             | glycine decarboxylase                                                               | -1.32  | 0.005 | -1.04 | 0.539 | -1.07 | 0.348 |
| 96828_at    | 1417422_at   | Gnmt             | glycine N-methyltransferase                                                         | -1.21  | 0.004 | 1.05  | 0.953 | 1.12  | 0.269 |
| 92217_s_at  | 1420394_s_at | Gp49a /// Liirb4 | glycoprotein 49 A /// leukocyte immunoglobulin-like receptor, subfamily B, member 4 | 3.78   | 0.000 | 1.69  | 0.089 | 1.84  | 0.032 |
| 96925_at    | 1433495_at   | Glt25d1          | glycosyltransferase 25 domain containing 1                                          | 1.25   | 0.009 | 1.07  | 0.288 | 1.16  | 0.072 |
| 160158_at   | 1450990_at   | Gpc3             | glypican 3                                                                          | 2.52   | 0.007 | -1.03 | 0.200 | 1.04  | 0.331 |
| 92672_at    | 1453413_at   | Gnas             | GNAS (guanine nucleotide binding protein, alpha stimulating) complex locus          | -1.47  | 0.007 | -1.27 | 0.063 | -1.33 | 0.080 |
| 102003_at   | 1415709_s_at | Gbf1             | golgi-specific brefeldin A-resistance factor 1                                      | -1.17  | 0.004 | 1.01  | 0.625 | -1.08 | 0.052 |
| 99107_at    | 1451871_a_at | Ghr              | Growth hormone receptor                                                             | -2.32  | 0.006 | -1.06 | 0.311 | 1.09  | 0.650 |
| 160172_at   | 1426758_s_at | Gtl2             | GTL2, imprinted maternally expressed untranslated mRNA                              | 1.63   | 0.002 | 1.64  | 0.049 | 1.13  | 0.165 |
| 99340_at    | 1455168_a_at | Gnb2-rs1         | guanine nucleotide binding protein, beta 2, related sequence 1                      | 1.15   | 0.003 | 1.04  | 0.354 | 1.05  | 0.071 |
| 101582_at   | 1426579_at   | Gnl2             | guanine nucleotide binding protein-like 2 (nucleolar)                               | 1.13   | 0.005 | -1.09 | 0.849 | -1    | 0.260 |
| 100708_at   | 1420376_a_at | H3f3b            | H3 histone, family 3B                                                               | 1.4    | 0.000 | 1.1   | 0.211 | -1.05 | 0.249 |
| 98111_at    | 1425993_a_at | Hsp105           | heat shock protein 105                                                              | -2.07  | 0.009 | -1.02 | 0.779 | 1.01  | 0.696 |

|             |              |                     |                                                                                                           |       |       |       |       |       |       |
|-------------|--------------|---------------------|-----------------------------------------------------------------------------------------------------------|-------|-------|-------|-------|-------|-------|
| 160101_at   | 1448239_at   | Hmox1               | heme oxygenase (decycling) 1                                                                              | 2.43  | 0.001 | -1.18 | 0.127 | -1.53 | 0.036 |
| 103533_at   | 1450736_a_at | Hbb-bh1             | hemoglobin Z, beta-like embryonic chain                                                                   | 1.21  | 0.007 | 1.44  | 0.000 | 1.2   | 0.007 |
| 93118_at    | 1433829_a_at | Hnrpa2b1            | heterogeneous nuclear ribonucleoprotein A2/B1                                                             | 1.28  | 0.010 | 1.06  | 0.316 | -1.17 | 0.145 |
| 94303_at    | 1425142_a_at | Hnrpd               | heterogeneous nuclear ribonucleoprotein D                                                                 | 1.39  | 0.002 | 1.04  | 0.390 | -1.08 | 0.996 |
| 96084_at    | 1428224_at   | Hnrpdl              | heterogeneous nuclear ribonucleoprotein D-like                                                            | 1.32  | 0.001 | 1.11  | 0.013 | -1.14 | 0.687 |
| 94041_at    | 1423684_at   | Hnrpk               | heterogeneous nuclear ribonucleoprotein K                                                                 | 1.22  | 0.003 | -1.02 | 0.689 | -1.06 | 0.483 |
| 93095_at    | 1416176_at   | Hmgb1               | high mobility group box 1                                                                                 | -1.1  | 0.004 | -1.01 | 0.559 | -1.03 | 0.171 |
| 160447_at   | 1423195_at   | Hiat1               | hippocampus abundant gene transcript 1                                                                    | -1.1  | 0.000 | -1.03 | 0.016 | -1.07 | 0.056 |
| 101681_f_at | 1450531_at   | H2-BI               | histocompatibility 2, blastocyst                                                                          | 1.13  | 0.007 | 1.1   | 0.013 | -1.04 | 0.250 |
| 92866_at    | 1452431_s_at | H2-Aa               | histocompatibility 2, class II antigen A, alpha                                                           | 1.25  | 0.008 | -1.22 | 0.445 | -1.01 | 0.072 |
| 103671_at   | 1451814_a_at | Htatip2             | HIV-1 tat interactive protein 2, homolog (human)                                                          | 1.79  | 0.008 | -1.02 | 0.520 | 1.09  | 0.810 |
| 96672_at    | 1428662_a_at | MGI:1916782         | homeobox only domain                                                                                      | -3.61 | 0.001 | -1.43 | 0.918 | -1.32 | 0.645 |
| 95057_at    | 1448185_at   | Herpud1             | homocysteine-inducible, endoplasmic reticulum stress-inducible, ubiquitin-like domain member 1            | -1.48 | 0.002 | -1.23 | 0.252 | -1.19 | 0.057 |
| 97551_at    | 1425553_s_at | Hip1r               | huntingtin interacting protein 1 related                                                                  | 1.37  | 0.000 | 1.12  | 0.028 | 1.01  | 0.511 |
| 100042_at   | 1424172_at   | Hagh                | hydroxyacyl glutathione hydrolase                                                                         | -1.28 | 0.000 | 1.07  | 0.138 | 1.09  | 0.247 |
| 94276_at    | 1450011_at   | Hsd17b12            | hydroxysteroid (17-beta) dehydrogenase 12                                                                 | -1.04 | 0.010 | 1.12  | 0.625 | 1.03  | 0.038 |
| 160768_at   | 1423879_at   | D030056L22          | hypothetical protein D030056L22                                                                           | -1.37 | 0.001 | 1.04  | 0.600 | 1.11  | 0.833 |
| 101094_at   | 1416480_a_at | MGI:1930666         | hypoxia induced gene 1                                                                                    | -1.14 | 0.003 | 1.01  | 0.706 | 1.03  | 0.922 |
| 95336_at    | 1421572_at   | Hif3a               | hypoxia inducible factor 3, alpha subunit                                                                 | 1.29  | 0.000 | 1.04  | 0.166 | 1.02  | 0.145 |
| 101054_at   | 1425519_a_at | Ii                  | Ia-associated invariant chain                                                                             | 1.58  | 0.009 | -1.24 | 0.449 | -1.06 | 0.427 |
| 104500_at   | 1418793_at   | Idua                | iduronidase, alpha-L-                                                                                     | 1.24  | 0.002 | -1.05 | 0.294 | -1.05 | 0.338 |
| 160820_at   | 1460675_at   | Igsf8               | immunoglobulin superfamily, member 8                                                                      | 1.38  | 0.010 | 1.1   | 0.364 | -1.14 | 0.270 |
| 95034_f_at  | 1436420_a_at | Ipo4                | importin 4                                                                                                | 1.47  | 0.010 | 1.18  | 0.155 | 1.1   | 0.330 |
| 104163_at   | 1426760_at   | Ipo8                | importin 8                                                                                                | -1.15 | 0.006 | 1.07  | 0.465 | 1.08  | 0.310 |
| 101501_r_at | 1415911_at   | Impact              | imprinted and ancient                                                                                     | 1.55  | 0.002 | 1.07  | 0.427 | 1.03  | 0.719 |
| 100050_at   | 1425895_a_at | Id1                 | inhibitor of DNA binding 1                                                                                | 2.13  | 0.001 | 1.12  | 0.786 | -1.19 | 0.219 |
| 93013_at    | 1435176_a_at | Id2                 | inhibitor of DNA binding 2                                                                                | 2.23  | 0.001 | 1.25  | 0.704 | 1.24  | 0.766 |
| 92614_at    | 1416630_at   | Id3                 | inhibitor of DNA binding 3                                                                                | 1.43  | 0.004 | 1.08  | 0.834 | 1.07  | 0.731 |
| 101498_at   | 1436848_x_at | Impa1               | inositol (myo)-1(or 4)-monophosphatase 1                                                                  | -1.39 | 0.006 | -1.04 | 0.498 | -1.05 | 0.397 |
| 160290_at   | 1423120_at   | Ide                 | insulin degrading enzyme                                                                                  | -1.11 | 0.005 | -1.18 | 0.105 | -1.12 | 0.171 |
| 95546_g_at  | 1452014_a_at | Igf1                | insulin-like growth factor 1                                                                              | -1.96 | 0.001 | 1.02  | 0.894 | 1.21  | 0.133 |
| 95082_at    | 1423062_at   | Igfbp3              | insulin-like growth factor binding protein 3                                                              | -1.39 | 0.002 | 1.03  | 0.611 | -1.07 | 0.385 |
| 97987_at    | 1422826_at   | Igfals              | insulin-like growth factor binding protein, acid labile subunit                                           | -2.43 | 0.000 | 1.05  | 0.245 | 1.12  | 0.198 |
| 96283_at    | 1415961_at   | Itn2c               | integral membrane protein 2C                                                                              | 1.5   | 0.002 | 1.13  | 0.841 | 1.06  | 0.569 |
| 104386_f_at | 1452784_at   | Ilgav               | integrin alpha V                                                                                          | 1.18  | 0.008 | 1.01  | 0.304 | -1.09 | 0.669 |
| 99904_at    | 1421511_at   | Irgb3               | integrin beta 3                                                                                           | -1.31 | 0.006 | 1.07  | 0.794 | -1.02 | 0.797 |
| 100906_at   | 1418741_at   | Irgb7               | integrin beta 7                                                                                           | 1.8   | 0.001 | -1.19 | 0.512 | -1.04 | 0.958 |
| 98014_at    | 1417973_at   | Ilih1               | inter-alpha trypsin inhibitor, heavy chain 1                                                              | -1.1  | 0.007 | 1.05  | 0.953 | 1.03  | 0.570 |
| 96752_at    | 1424067_at   | Icam1               | intercellular adhesion molecule                                                                           | 1.61  | 0.001 | 1.08  | 0.483 | 1.19  | 0.054 |
| 102149_f_at | 1422404_x_at | Ilna1 /// Ilna2 /// | interferon alpha family, gene 1 /// interferon alpha family, gene 2 /// interferon alpha family, gene 4 / | -2.17 | 0.010 | -1.35 | 0.305 | -1.38 | 0.162 |
| 100007_at   | 1451252_at   | Irf2bp1             | interferon regulatory factor 2 binding protein 1                                                          | -1.28 | 0.009 | -1.2  | 0.194 | -1.44 | 0.004 |
| 104760_at   | 1451016_at   | Ifrd2               | interferon-related developmental regulator 2                                                              | -1.45 | 0.000 | -1.08 | 0.034 | 1.08  | 0.889 |
| 99491_at    | 1419455_at   | Il10rb              | interleukin 10 receptor, beta                                                                             | 1.46  | 0.009 | 1.45  | 0.017 | 1.67  | 0.002 |
| 101905_at   | 1415769_at   | Itch                | itchy                                                                                                     | -1.3  | 0.003 | -1.12 | 0.841 | -1.16 | 0.286 |
| 98911_at    | 1433803_at   | Jak1                | Janus kinase 1                                                                                            | 1.13  | 0.000 | 1.11  | 0.096 | 1.13  | 0.170 |
| 93601_at    | 1450746_at   | Keap1               | kelch-like ECH-associated protein 1                                                                       | -1.22 | 0.000 | -1.15 | 0.017 | -1.08 | 0.194 |
| 94270_at    | 1448169_at   | Krt1-18             | keratin complex 1, acidic, gene 18                                                                        | 2.24  | 0.001 | -1.01 | 0.662 | 1.05  | 0.948 |
| 101009_at   | 1435989_x_at | Krt2-8              | keratin complex 2, basic, gene 8                                                                          | 1.86  | 0.004 | -1.05 | 0.105 | 1.04  | 0.328 |
| 96938_at    | 1416833_at   | Keg1                | kidney expressed gene 1                                                                                   | -2.68 | 0.001 | 1.05  | 0.292 | 1.14  | 0.088 |
| 94772_at    | 1450296_at   | Klrb1a              | killer cell lectin-like receptor subfamily B member 1A                                                    | 2.65  | 0.004 | 1.8   | 0.107 | 1.62  | 0.185 |
| 93677_at    | 1460245_at   | Klrd1               | killer cell lectin-like receptor, subfamily D, member 1                                                   | 1.75  | 0.001 | 1.14  | 0.078 | 1.19  | 0.026 |
| 97976_at    | 1455434_a_at | Ktn1                | kinectin 1                                                                                                | 1.3   | 0.009 | -1.08 | 0.214 | -1.01 | 0.657 |
| 93837_at    | 1416676_at   | Kng1                | kininogen 1                                                                                               | 1.1   | 0.008 | -1.05 | 0.717 | -1.08 | 0.562 |

|             |              |                 |                                                                                                      |       |       |       |       |       |       |
|-------------|--------------|-----------------|------------------------------------------------------------------------------------------------------|-------|-------|-------|-------|-------|-------|
| 96072_at    | 1419737_a_at | Ldh1            | lactate dehydrogenase 1, A chain                                                                     | 1.23  | 0.003 | 1.16  | 0.066 | 1.12  | 0.183 |
| 93103_at    | 1415847_at   | Ldh3            | lactate dehydrogenase 3, C chain, sperm specific                                                     | -1.89 | 0.003 | 1.12  | 0.595 | 1.35  | 0.175 |
| 98059_s_at  | 1421654_a_at | Lmna            | lamin A                                                                                              | 1.31  | 0.007 | -1.12 | 0.339 | 1.04  | 0.534 |
| 97750_at    | 1448245_at   | Lamr1           | laminin receptor 1 (ribosomal protein SA)                                                            | 1.25  | 0.002 | -1.1  | 0.220 | -1.05 | 0.757 |
| 95706_at    | 1426808_at   | Lgals3          | lectin, galactose binding, soluble 3                                                                 | 2.39  | 0.002 | 1.69  | 0.079 | 1.28  | 0.626 |
| 100431_at   | 1425644_at   | Lepr            | leptin receptor                                                                                      | 2.96  | 0.004 | -1.15 | 0.278 | -1.72 | 0.095 |
| 93600_at    | 1424438_a_at | Leprot          | leptin receptor overlapping transcript                                                               | 1.16  | 0.007 | -1.06 | 0.485 | -1.14 | 0.896 |
| 104659_g_at | 1425107_a_at | Lifr            | leukemia inhibitory factor receptor                                                                  | -2.41 | 0.001 | -1.06 | 0.874 | 1.09  | 0.140 |
| 98962_at    | 1419560_at   | Lipc            | lipase, hepatic                                                                                      | -1.31 | 0.000 | 1.04  | 0.706 | 1.09  | 0.313 |
| 99452_at    | 1451255_at   | MGI:1927471     | liver-specific bHLH-Zip transcription factor                                                         | -1.8  | 0.002 | -1.14 | 0.386 | -1.03 | 0.589 |
| 100086_at   | 1452148_at   | Lrpap1          | low density lipoprotein receptor-related protein associated protein 1                                | 1.35  | 0.007 | 1.06  | 0.556 | 1.26  | 0.015 |
| 96186_at    | 1416836_at   | Lrp10           | low-density lipoprotein receptor-related protein 10                                                  | -1.38 | 0.003 | -1.27 | 0.022 | -1.29 | 0.003 |
| 104093_at   | 1417756_a_at | Lsp1            | lymphocyte specific 1                                                                                | 1.46  | 0.010 | 1.14  | 0.314 | 1.03  | 0.862 |
| 100611_at   | 1423547_at   | Lyzs            | lysozyme                                                                                             | 1.86  | 0.000 | 1.19  | 0.242 | 1.43  | 0.028 |
| 99071_at    | 1427076_at   | Mpeg1           | macrophage expressed gene 1                                                                          | 2.35  | 0.007 | 1.9   | 0.051 | 1.44  | 0.245 |
| 102974_at   | 1449498_at   | Marco           | macrophage receptor with collagenous structure                                                       | 5.02  | 0.003 | 1.82  | 0.211 | 1.44  | 0.821 |
| 94792_at    | 1448061_at   | Msr1            | Macrophage scavenger receptor 1                                                                      | 1.53  | 0.006 | 1.1   | 0.054 | 1.09  | 0.080 |
| 102984_g_at | 1448208_at   | Smad1           | MAD homolog 1 (Drosophila)                                                                           | 1.32  | 0.001 | 1.02  | 0.484 | -1.02 | 0.180 |
| 160550_i_at | 1416212_at   | Magoh           | mago-nashi homolog, proliferation-associated (Drosophila)                                            | 1.28  | 0.004 | 1.15  | 0.238 | 1.27  | 0.030 |
| 94549_at    | 1424129_at   | Mfsd1           | major facilitator superfamily domain containing 1                                                    | -1.43 | 0.005 | -1.08 | 0.687 | 1.06  | 0.231 |
| 93195_at    | 1429005_at   | Mfhas1          | malignant fibrous histiocytoma amplified sequence 1                                                  | -1.51 | 0.000 | -1.02 | 0.380 | -1.04 | 0.496 |
| 101474_at   | 1419578_at   | Mbl1            | mannose binding lectin, liver (A)                                                                    | -1.66 | 0.004 | 1.01  | 0.376 | 1.05  | 0.284 |
| 92847_s_at  | 1416385_a_at | M6pr            | mannose-6-phosphate receptor, cation dependent                                                       | -1.11 | 0.009 | 1.02  | 0.843 | -1    | 0.598 |
| 160580_at   | 1417110_at   | Man1a           | mannosidase 1, alpha                                                                                 | -1.42 | 0.001 | -1.15 | 0.090 | -1.12 | 0.220 |
| 99562_at    | 1416340_a_at | Man2b1          | mannosidase 2, alpha B1                                                                              | 1.2   | 0.003 | 1.12  | 0.544 | 1.13  | 0.114 |
| 97436_at    | 1423687_a_at | Man2c1          | mannosidase, alpha, class 2C, member 1                                                               | 1.24  | 0.004 | -1.01 | 0.861 | -1    | 0.739 |
| 96012_f_at  | 1438368_a_at | Matr3           | matrin 3                                                                                             | 1.12  | 0.007 | -1.08 | 0.842 | -1.15 | 0.299 |
| 94289_r_at  | 1426306_a_at | Maged2          | melanoma antigen, family D, 2                                                                        | 1.87  | 0.002 | 1.44  | 0.175 | 1.37  | 0.174 |
| 99604_at    | 1428843_at   |                 | 5-Mar membrane-associated ring finger (C3HC4) 5                                                      | 1.2   | 0.000 | -1.02 | 0.577 | -1.02 | 0.591 |
| 160103_at   | 1420609_at   |                 | 7-Mar membrane-associated ring finger (C3HC4) 7                                                      | 1.28  | 0.008 | -1.05 | 0.071 | -1.03 | 0.322 |
| 102022_at   | 1438477_a_at | Mcee            | methylmalonyl CoA epimerase                                                                          | -1.15 | 0.001 | 1.03  | 0.137 | 1.28  | 0.133 |
| 99613_at    | 1448486_at   | Mut             | methylmalonyl-Coenzyme A mutase                                                                      | -1.11 | 0.001 | 1.06  | 0.650 | 1.11  | 0.176 |
| 160929_at   | 1423099_a_at | Mettl3          | methyltransferase-like 3                                                                             | -1.04 | 0.004 | 1.07  | 0.817 | 1.14  | 0.065 |
| 104742_at   | 1452592_at   | Mgst2           | microsomal glutathione S-transferase 2                                                               | 4.63  | 0.005 | 1.33  | 0.200 | 1.11  | 0.390 |
| 160258_at   | 1416765_s_at | MGI:1913699     | mitochondria-associated protein involved in granulocyte-macrophage colony-stimulating factor sign    | -1.15 | 0.006 | -1.07 | 0.335 | -1.07 | 0.185 |
| 101834_at   | 1427060_at   | Mapk3           | mitogen activated protein kinase 3                                                                   | 1.18  | 0.005 | 1.12  | 0.182 | 1.09  | 0.186 |
| 100391_at   | 1420931_at   | Mapk8           | mitogen activated protein kinase 8                                                                   | -1.55 | 0.008 | -1.21 | 0.106 | -1.46 | 0.048 |
| 92585_at    | 1416351_at   | Map2k1          | mitogen activated protein kinase kinase 1                                                            | -1.16 | 0.005 | 1.16  | 0.420 | 1.18  | 0.344 |
| 99960_at    | 1426233_at   | Map2k4          | mitogen activated protein kinase kinase 4                                                            | -1.34 | 0.008 | -1    | 0.448 | -1.07 | 0.103 |
| 103020_s_at | 1424850_at   | Map3k1          | mitogen activated protein kinase kinase kinase 1                                                     | 1.2   | 0.003 | 1.03  | 0.599 | -1.1  | 0.741 |
| 104272_s_at | 1421450_a_at | Map3k4          | mitogen activated protein kinase kinase kinase 4                                                     | -1.2  | 0.007 | -1.04 | 0.282 | 1.11  | 0.059 |
| 94007_at    | 1456142_x_at | Morf4l1         | mortality factor 4 like 1                                                                            | 1.05  | 0.007 | 1.08  | 0.142 | 1.05  | 0.011 |
| 96783_at    | 1426014_a_at | Mucdhl          | mucin and cadherin like                                                                              | -2.47 | 0.007 | -1.12 | 0.212 | -1.34 | 0.804 |
| 97451_at    | 1424024_at   | Mcfd2           | multiple coagulation factor deficiency 2                                                             | -1.12 | 0.007 | -1.01 | 0.937 | -1    | 0.383 |
| 92837_f_at  | 1417835_at   | Mug1            | murinoglobulin 1                                                                                     | -2.38 | 0.001 | -1.12 | 0.671 | 1.12  | 0.422 |
| 97680_at    | 1448854_s_at | Mug-ps1 /// Muç | murinoglobulin, pseudogene 1 /// murinoglobulin 1 /// murinoglobulin 2 /// similar to Murinoglobulin | -2.33 | 0.001 | 1.05  | 0.490 | 1.33  | 0.048 |
| 99089_at    | 1417275_at   | Mal             | myelin and lymphocyte protein, T-cell differentiation protein                                        | 1.63  | 0.001 | 1.32  | 0.023 | -1.23 | 0.759 |
| 160337_at   | 1415977_at   | MGI:1919030     | myo-inositol 1-phosphate synthase A1                                                                 | 2.74  | 0.001 | 1.18  | 0.730 | 1.22  | 0.737 |
| 94537_at    | 1428608_at   | Mylc2b          | myosin light chain, regulatory B                                                                     | 1.18  | 0.004 | 1.11  | 0.111 | 1.11  | 0.002 |
| 94713_at    | 1421385_a_at | Myo7a           | myosin VIIa                                                                                          | 1.42  | 0.009 | 1.24  | 0.360 | 1.19  | 0.349 |
| 103264_at   | 1421879_at   | Mtmr1           | myotubularin related protein 1                                                                       | -1.45 | 0.002 | -1.04 | 0.255 | -1.03 | 0.319 |
| 96865_at    | 1415973_at   | Marcks          | Myristoylated alanine rich protein kinase C substrate                                                | 1.52  | 0.001 | 1.24  | 0.113 | 1.21  | 0.369 |
| 100575_at   | 1417118_a_at | Ard1            | N-acetyltransferase ARD1 homolog (S. cerevisiae)                                                     | -1.04 | 0.004 | -1.11 | 0.015 | 1.48  | 0.112 |

|             |              |             |                                                                                           |       |       |       |       |       |       |
|-------------|--------------|-------------|-------------------------------------------------------------------------------------------|-------|-------|-------|-------|-------|-------|
| 96280_at    | 1417368_s_at | Ndufa2      | NADH dehydrogenase (ubiquinone) 1 alpha subcomplex, 2                                     | 1.13  | 0.003 | 1     | 0.990 | -1.01 | 0.837 |
| 96273_at    | 1423231_at   | Nrgn        | neurogranin                                                                               | 1.41  | 0.003 | -1.05 | 0.082 | -1.48 | 0.994 |
| 161032_i_at | 1419325_at   | Nmu         | neuromedin U                                                                              | -1.42 | 0.001 | -1.08 | 0.094 | 1.24  | 0.445 |
| 102326_at   | 1448561_at   | Ncf2        | neutrophil cytosolic factor 2                                                             | 1.77  | 0.004 | 1.35  | 0.116 | 1.22  | 0.369 |
| 100120_at   | 1416808_at   | Nid1        | nidogen 1                                                                                 | 1.55  | 0.004 | 1.17  | 0.496 | -1.05 | 0.085 |
| 94236_at    | 1452156_a_at | Nisch       | nischarin                                                                                 | 1.16  | 0.003 | 1.06  | 0.150 | 1     | 0.833 |
| 92190_at    | 1418605_at   | Nr2c1       | nuclear receptor subfamily 2, group C, member 1                                           | -1.18 | 0.009 | -1.02 | 0.127 | 1.3   | 0.183 |
| 102796_at   | 1423522_at   | Npm3        | nucleoplasmin 3                                                                           | -4.58 | 0.004 | -2.17 | 0.155 | -2.23 | 0.140 |
| 94828_at    | 1416750_at   | Oprs1       | opioid receptor, sigma 1                                                                  | -1.25 | 0.009 | 1.14  | 0.291 | 1.21  | 0.089 |
| 160193_at   | 1424235_at   | Ormdl2      | ORM1-like 2 (S. cerevisiae)                                                               | -1.22 | 0.008 | 1.03  | 0.475 | 1.07  | 0.121 |
| 98003_at    | 1424302_at   | Pirb        | paired-Ig-like receptor B                                                                 | 1.77  | 0.003 | 1.14  | 0.624 | 1.34  | 0.088 |
| 101451_at   | 1417355_at   | Peg3        | paternally expressed 3                                                                    | 2.37  | 0.002 | -1.48 | 0.076 | -1.4  | 0.208 |
| 104080_at   | 1434019_at   | Pdap1       | PDGFA associated protein 1                                                                | -1.16 | 0.006 | -1.13 | 0.384 | -1.29 | 0.018 |
| 104094_at   | 1417928_at   | Pdlim4      | PDZ and LIM domain 4                                                                      | 4.43  | 0.007 | 2.51  | 0.224 | 4.34  | 0.006 |
| 94505_at    | 1417371_at   | Peli1       | pellino 1                                                                                 | -1.15 | 0.003 | 1.17  | 0.019 | 1.06  | 0.921 |
| 94491_at    | 1422471_at   | Pex13       | peroxisomal biogenesis factor 13                                                          | -1.17 | 0.007 | -1.13 | 0.068 | 1.06  | 0.174 |
| 97926_s_at  | 1420715_a_at | Pparg       | peroxisome proliferator activated receptor gamma                                          | 2.49  | 0.003 | 1.11  | 0.690 | 1.87  | 0.018 |
| 97825_at    | 1416271_at   | Perp        | PERP, TP53 apoptosis effector                                                             | -1.18 | 0.002 | 1.05  | 0.825 | 1.08  | 0.693 |
| 95407_at    | 1454638_a_at | Pah         | phenylalanine hydroxylase                                                                 | -1.12 | 0.004 | -1.04 | 0.436 | -1.04 | 0.362 |
| 96627_at    | 1416667_at   | Ebp         | phenylalkylamine Ca2+ antagonist (emopamil) binding protein                               | -1.44 | 0.001 | 1.01  | 0.771 | 1.12  | 0.003 |
| 161074_at   | 1438011_at   | Pcyt1a      | phosphate cytidylyltransferase 1, choline, alpha isoform                                  | -1.35 | 0.004 | -1.08 | 0.151 | -1.04 | 0.509 |
| 96662_at    | 1429514_at   | Ppap2b      | phosphatidic acid phosphatase type 2B                                                     | -1.42 | 0.008 | -1.18 | 0.266 | -1.21 | 0.100 |
| 104208_at   | 1435003_at   | Pik4ca      | phosphatidylinositol 4-kinase, catalytic, alpha polypeptide                               | 1.29  | 0.002 | -1.09 | 0.398 | -1.03 | 0.862 |
| 95358_at    | 1449404_at   | Pip5k2a     | phosphatidylinositol-4-phosphate 5-kinase, type II, alpha                                 | 1.35  | 0.009 | -1.02 | 0.857 | 1.03  | 0.619 |
| 97965_at    | 1422147_a_at | Pla2g6      | phospholipase A2, group VI                                                                | 1.36  | 0.000 | -1.25 | 0.720 | -1.07 | 0.172 |
| 100607_at   | 1416013_at   | Pld3        | phospholipase D3                                                                          | 1.32  | 0.004 | 1.1   | 0.541 | 1.06  | 0.530 |
| 102839_at   | 1453181_x_at | Plscr1      | phospholipid scramblase 1                                                                 | 1.65  | 0.000 | 1.13  | 0.992 | 1.17  | 0.570 |
| 96295_at    | 1451064_a_at | Psat1       | phosphoserine aminotransferase 1                                                          | 1.97  | 0.005 | 1.35  | 0.499 | 1.33  | 0.634 |
| 93039_at    | 1416441_at   | MGI:1889205 | plasma glutamate carboxypeptidase                                                         | -1.09 | 0.010 | 1.01  | 0.233 | 1.02  | 0.347 |
| 94445_at    | 1423725_at   | Pls3        | plastin 3 (T-isoform)                                                                     | -1.55 | 0.001 | -1.05 | 0.614 | -1.09 | 0.352 |
| 104138_at   | 1448489_at   | Pafah2      | platelet-activating factor acetylhydrolase 2                                              | -1.49 | 0.004 | -1.11 | 0.529 | -1.04 | 0.870 |
| 101064_at   | 1448282_at   | Plrg1       | pleiotropic regulator 1, PRL1 homolog (Arabidopsis)                                       | 1.17  | 0.001 | 1.13  | 0.279 | 1.18  | 0.005 |
| 92867_at    | 1437239_x_at | Phc2        | polyhomeotic-like 2 (Drosophila)                                                          | 1.2   | 0.007 | 1     | 0.732 | -1.09 | 0.363 |
| 100408_at   | 1421015_s_at | Pole3       | polymerase (DNA directed), epsilon 3 (p17 subunit)                                        | -1.35 | 0.007 | -1.22 | 0.012 | -1.26 | 0.026 |
| 97651_at    | 1419501_at   | Polk        | polymerase (DNA directed), kappa                                                          | -1.14 | 0.007 | -1.11 | 0.053 | -1.17 | 0.265 |
| 97332_at    | 1416378_at   | Pnkp        | polynucleotide kinase 3'-phosphatase                                                      | -1.2  | 0.009 | 1.04  | 0.460 | 1.15  | 0.508 |
| 104735_at   | 1434881_s_at | Kctd12      | potassium channel tetramerisation domain containing 12                                    | 1.77  | 0.003 | 1.31  | 0.331 | 1.34  | 0.206 |
| 97100_at    | 1449536_at   | Kcnn1       | potassium intermediate/small conductance calcium-activated channel, subfamily N, member 1 | -2.15 | 0.004 | -1.45 | 0.032 | -1.01 | 0.956 |
| 102892_at   | 1416956_at   | Kcnab2      | potassium voltage-gated channel, shaker-related subfamily, beta member 2                  | 2.33  | 0.001 | 1.47  | 0.283 | 1.63  | 0.109 |
| 93968_at    | 1450638_at   | Pdcd5       | programmed cell death 5                                                                   | 1.54  | 0.006 | 1.14  | 0.082 | -1.03 | 0.458 |
| 93926_at    | 1421382_at   | Prlr        | prolactin receptor                                                                        | -2.02 | 0.001 | 1.08  | 0.023 | 1.18  | 0.034 |
| 95030_at    | 1448556_at   | Prlr        | prolactin receptor                                                                        | -2.16 | 0.002 | -1.11 | 0.650 | -1.29 | 0.086 |
| 100125_at   | 1450854_at   | Pa2g4       | proliferation-associated 2G4                                                              | -1.57 | 0.008 | 1.05  | 0.290 | -1.39 | 0.020 |
| 95597_at    | 1436448_a_at | Ptgs1       | prostaglandin-endoperoxide synthase 1                                                     | 1.78  | 0.008 | 1.4   | 0.186 | 1.34  | 0.334 |
| 93803_at    | 1418078_at   | Psme3       | proteasome (prosome, macropain) 28 subunit, 3                                             | -1.84 | 0.001 | -1.03 | 0.382 | -1.18 | 0.748 |
| 93735_f_at  | 1416282_at   | Psmc3       | proteasome (prosome, macropain) 26S subunit, ATPase 3                                     | 1.18  | 0.010 | 1.03  | 0.967 | 1.13  | 0.016 |
| 96952_at    | 1416506_at   | Psm6        | proteasome (prosome, macropain) subunit, alpha type 6                                     | 1.15  | 0.008 | -1.03 | 0.334 | 1.07  | 0.088 |
| 101055_at   | 1448128_at   | Ppqb        | protective protein for beta-galactosidase                                                 | 1.25  | 0.001 | 1.06  | 0.386 | 1.11  | 0.195 |
| 99510_at    | 1460419_a_at | Prkcb1      | protein kinase C, beta 1                                                                  | 1.37  | 0.004 | 1.1   | 0.421 | 1.18  | 0.073 |
| 94161_at    | 1449956_at   | Prkce       | protein kinase C, epsilon                                                                 | -1.54 | 0.008 | -1.32 | 0.119 | -1.43 | 0.018 |
| 103559_at   | 1450519_a_at | Prkaca      | protein kinase, cAMP dependent, catalytic, alpha                                          | -1.48 | 0.009 | 1.02  | 0.397 | 1.02  | 0.357 |
| 101482_at   | 1450149_a_at | Ppp1cc      | protein phosphatase 1, catalytic subunit, gamma isoform                                   | 1.07  | 0.007 | -1.03 | 0.940 | -1.06 | 0.439 |
| 104525_at   | 1428351_at   | Ppm1m       | protein phosphatase 1M                                                                    | -1.17 | 0.010 | 1.05  | 0.837 | 1.18  | 0.052 |



|             |              |                     |                                                                                                     |       |       |       |       |       |       |
|-------------|--------------|---------------------|-----------------------------------------------------------------------------------------------------|-------|-------|-------|-------|-------|-------|
| 92638_at    | 1456390_at   | Ppp2ca              | protein phosphatase 2a, catalytic subunit, alpha isoform                                            | 1.35  | 0.004 | 1.06  | 0.263 | 1.15  | 0.098 |
| 160821_r_at | 1424346_at   | Ppp6c               | protein phosphatase 6, catalytic subunit                                                            | -1.2  | 0.009 | -1.16 | 0.011 | -1.09 | 0.023 |
| 94929_at    | 1417068_a_at | Ptpn1               | protein tyrosine phosphatase, non-receptor type 1                                                   | 1.32  | 0.000 | -1.05 | 0.571 | -1.24 | 0.063 |
| 92273_at    | 1419125_at   | Ptpn18              | protein tyrosine phosphatase, non-receptor type 18                                                  | 1.77  | 0.009 | 1.21  | 0.466 | 1.41  | 0.039 |
| 101048_at   | 1422124_a_at | Ptprc               | protein tyrosine phosphatase, receptor type, C                                                      | 1.76  | 0.004 | 1.4   | 0.114 | 1.36  | 0.141 |
| 93485_at    | 1435537_at   | Ptprd               | Protein tyrosine phosphatase, receptor type, D                                                      | -1.48 | 0.002 | -1.07 | 0.984 | -1.15 | 0.217 |
| 93896_at    | 1424886_at   | Ptprd               | protein tyrosine phosphatase, receptor type, D                                                      | -1.22 | 0.000 | -1.17 | 0.219 | -1.27 | 0.006 |
| 160480_at   | 1426794_at   | Ptprs               | protein tyrosine phosphatase, receptor type, S                                                      | 1.22  | 0.008 | 1.15  | 0.205 | 1.08  | 0.393 |
| 92802_s_at  | 1425467_a_at | Plp1                | proteolipid protein (myelin) 1                                                                      | -1.57 | 0.002 | -1.38 | 0.068 | -1.59 | 0.002 |
| 102807_at   | 1434138_at   | Prune               | prune homolog (Drosophila)                                                                          | 1.07  | 0.003 | 1.01  | 0.205 | 1.04  | 0.023 |
| 101472_s_at | 1421259_at   | Pklr                | pyruvate kinase liver and red blood cell                                                            | -1.92 | 0.005 | 1.16  | 0.784 | 1.16  | 0.725 |
| 97415_at    | 1418890_a_at | Rab3d               | RAB3D, member RAS oncogene family                                                                   | 1.76  | 0.001 | 1.03  | 0.326 | 1.24  | 0.266 |
| 96262_at    | 1424684_at   | Rab5c               | RAB5C, member RAS oncogene family                                                                   | -2.36 | 0.001 | -1.38 | 0.234 | -1.54 | 0.127 |
| 104108_at   | 1424015_at   | Rab6jp1             | Rab6 interacting protein 1                                                                          | 1.17  | 0.010 | 1.05  | 0.307 | 1.03  | 0.537 |
| 92410_at    | 1422964_at   | Rad23a              | RAD23a homolog (S. cerevisiae)                                                                      | -1.38 | 0.000 | 1.08  | 0.110 | 1.26  | 0.707 |
| 101858_at   | 1460704_at   | Rfng                | radical fringe gene homolog (Drosophila)                                                            | -1.22 | 0.010 | -1.03 | 0.772 | -1.08 | 0.416 |
| 93070_at    | 1426946_at   | Ranbp5              | RAN binding protein 5                                                                               | 1.39  | 0.006 | 1.02  | 0.921 | 1.03  | 0.857 |
| 92659_at    | 1421622_a_at | Rapgef4             | Rap guanine nucleotide exchange factor (GEF) 4                                                      | -2.13 | 0.003 | -1.35 | 0.077 | -1.55 | 0.014 |
| 96056_at    | 1448605_at   | Rhoc                | ras homolog gene family, member C                                                                   | 1.54  | 0.001 | 1.18  | 0.562 | 1.07  | 0.683 |
| 103231_at   | 1429319_at   | Rhoh                | ras homolog gene family, member H                                                                   | 1.99  | 0.004 | 1.97  | 0.058 | 2.18  | 0.004 |
| 92368_at    | 1420401_a_at | Ramp3               | receptor (calcitonin) activity modifying protein 3                                                  | 2.21  | 0.003 | 1.08  | 0.291 | 1.55  | 0.459 |
| 103606_r_at | 1417786_a_at | Rgs19               | regulator of G-protein signaling 19                                                                 | 1.48  | 0.009 | 1.33  | 0.102 | 1.32  | 0.055 |
| 93733_r_at  | 1422763_at   | Rgs19ip1            | regulator of G-protein signaling 19 interacting protein 1                                           | 1.3   | 0.001 | 1.14  | 0.141 | 1.33  | 0.001 |
| 98336_s_at  | 1451920_a_at | Recc1               | replication factor C 1                                                                              | -1.66 | 0.008 | -1.3  | 0.330 | -1.18 | 0.210 |
| 93839_at    | 1418101_a_at | Rtn3                | reticulum 3                                                                                         | 1.3   | 0.003 | 1.1   | 0.964 | 1.02  | 0.169 |
| 93081_at    | 1415775_at   | Rbbp7               | retinoblastoma binding protein 7                                                                    | 2.16  | 0.005 | 1.14  | 0.866 | 1.04  | 0.129 |
| 104716_at   | 1448754_at   | Rbp1                | retinol binding protein 1, cellular                                                                 | 1.23  | 0.006 | 1.06  | 0.725 | 1.02  | 0.814 |
| 101702_at   | 1421085_at   | Rs1h                | retinoschisis 1 homolog (human)                                                                     | -1.82 | 0.004 | -1.31 | 0.112 | -1.58 | 0.014 |
| 104450_at   | 1425971_at   | LOC277923           | reverse transcriptase                                                                               | -1.29 | 0.005 | -1.03 | 0.674 | -1.34 | 0.042 |
| 94258_at    | 1426454_at   | Arhgdib             | Rho, GDP dissociation inhibitor (GDI) beta                                                          | 1.6   | 0.001 | 1.2   | 0.226 | 1.12  | 0.503 |
| 98342_at    | 1448157_s_at | Rpl10               | ribosomal protein 10                                                                                | 1.18  | 0.004 | 1.05  | 0.619 | 1.07  | 0.782 |
| 100711_at   | 1431177_a_at | Rpl10a              | ribosomal protein L10A                                                                              | 1.17  | 0.005 | -1.03 | 0.118 | 1.03  | 0.940 |
| 102109_at   | 1460581_a_at | Rpl13 /// LOC277923 | ribosomal protein L13 /// similar to 60S ribosomal protein /// similar to 60S ribosomal protein L13 | 1.23  | 0.002 | -1.07 | 0.820 | -1.06 | 0.957 |
| 99653_at    | 1438626_x_at | Rpl14               | ribosomal protein L14                                                                               | 1.18  | 0.001 | -1.11 | 0.321 | -1.24 | 0.131 |
| 99335_at    | 1423855_x_at | Rpl17               | ribosomal protein L17                                                                               | 1.29  | 0.001 | -1.04 | 0.073 | 1.17  | 0.000 |
| 160476_f_at | 1436699_x_at | Rpl18               | ribosomal protein L18                                                                               | 1.25  | 0.008 | -1.08 | 0.258 | -1.02 | 0.563 |
| 97483_at    | 1416219_at   | Rpl19               | ribosomal protein L19                                                                               | 1.15  | 0.003 | -1.04 | 0.043 | -1.02 | 0.305 |
| 94823_at    | 1426660_x_at | Rpl23a              | ribosomal protein L23a                                                                              | 1.19  | 0.002 | -1.01 | 0.036 | 1.01  | 0.345 |
| 100727_at   | 1416074_a_at | Rpl28               | ribosomal protein L28                                                                               | 1.07  | 0.002 | -1.11 | 0.278 | -1.16 | 0.194 |
| 100734_at   | 1449323_a_at | Rpl3                | ribosomal protein L3                                                                                | 1.13  | 0.001 | -1.05 | 0.860 | -1.07 | 0.541 |
| 92628_at    | 1416520_x_at | Rpl36               | ribosomal protein L36                                                                               | 1.33  | 0.004 | -1.06 | 0.079 | 1.05  | 0.876 |
| 160081_at   | 1416807_at   | Rpl36a              | ribosomal protein L36a                                                                              | 1.5   | 0.006 | 1.07  | 0.881 | 1.06  | 0.847 |
| 100213_f_at | 1455578_x_at | Rpl41               | ribosomal protein L41                                                                               | 1.16  | 0.000 | 1.07  | 0.117 | 1.08  | 0.280 |
| 101129_at   | 1423665_a_at | Rpl5                | ribosomal protein L5                                                                                | 1.13  | 0.001 | 1.01  | 0.113 | 1.02  | 0.040 |
| 99093_at    | 1456497_x_at | Rps10               | ribosomal protein S10                                                                               | 1.25  | 0.001 | -1.03 | 0.111 | 1.01  | 0.841 |
| 94767_at    | 1424000_a_at | Rps11               | ribosomal protein S11                                                                               | 1.18  | 0.009 | -1.07 | 0.193 | -1.05 | 0.311 |
| 93730_at    | 1453467_s_at | Rps15a              | ribosomal protein S15a                                                                              | 1.25  | 0.006 | -1.05 | 0.063 | -1.01 | 0.191 |
| 99590_at    | 1459986_a_at | Rps17               | ribosomal protein S17                                                                               | 1.2   | 0.002 | 1.1   | 0.259 | 1.07  | 0.137 |
| 98333_at    | 1448739_x_at | Rps18               | ribosomal protein S18                                                                               | 1.15  | 0.001 | 1     | 0.550 | 1.02  | 0.249 |
| 100686_at   | 1431766_x_at | Rps2                | ribosomal protein S2                                                                                | 1.07  | 0.003 | 1     | 0.659 | 1.01  | 0.897 |
| 96358_at    | 1460175_at   | Rps23               | ribosomal protein S23                                                                               | 1.28  | 0.001 | 1.05  | 0.823 | 1.12  | 0.033 |
| 98564_f_at  | 1415876_a_at | Rps26               | ribosomal protein S26                                                                               | 1.19  | 0.001 | 1.01  | 0.049 | 1.03  | 0.785 |
| 93030_at    | 1449196_a_at | Rps27a              | ribosomal protein S27a                                                                              | 1.13  | 0.005 | -1.07 | 0.641 | -1.06 | 0.888 |

|             |              |              |                              |       |       |       |       |       |       |
|-------------|--------------|--------------|------------------------------|-------|-------|-------|-------|-------|-------|
| 98085_f_at  | 1454778_x_at | Rps28        | Ribosomal protein S28        | 1.21  | 0.003 | 1.01  | 0.415 | 1.02  | 0.723 |
| 101137_at   | 1435151_a_at | Rps3         | ribosomal protein S3         | 1.24  | 0.007 | 1.03  | 0.831 | 1.17  | 0.003 |
| 101664_at   | 1422475_a_at | Rps3a        | ribosomal protein S3a        | 1.13  | 0.010 | -1    | 0.119 | 1.07  | 0.321 |
| 99336_at    | 1416054_at   | Rps5         | ribosomal protein S5         | 1.22  | 0.002 | -1.06 | 0.186 | 1.02  | 0.533 |
| 100732_at   | 1436760_a_at | Rps8         | ribosomal protein S8         | 1.21  | 0.009 | -1.01 | 0.126 | 1.09  | 0.520 |
| 100694_at   | 1416277_a_at | Rplp1        | ribosomal protein, large, P1 | 1.15  | 0.000 | 1.01  | 0.778 | 1.07  | 0.298 |
| 92850_at    | 1452767_at   | Rrbp1        | ribosome binding protein 1   | 1.13  | 0.006 | 1.16  | 0.052 | -1.08 | 0.511 |
| 94518_at    | 1416245_at   | 0610033H09Ri | RIKEN cDNA 0610033H09 gene   | -1.05 | 0.005 | 1     | 0.079 | 1.11  | 0.794 |
| 160156_at   | 1423829_at   | 0910001A06Ri | RIKEN cDNA 0910001A06 gene   | 1.43  | 0.009 | 1.1   | 0.994 | 1.05  | 0.666 |
| 98033_at    | 1448786_at   | 1100001H23Ri | RIKEN cDNA 1100001H23 gene   | 1.52  | 0.000 | 1.07  | 0.205 | 1.02  | 0.344 |
| 95041_at    | 1449046_a_at | 1110007C05Ri | RIKEN cDNA 1110007C05 gene   | -1.46 | 0.001 | 1.2   | 0.087 | 1.25  | 0.018 |
| 95409_at    | 1415733_a_at | 1110019J04Ri | RIKEN cDNA 1110019J04 gene   | -1.28 | 0.005 | 1.04  | 0.844 | 1.24  | 0.118 |
| 160184_at   | 1423334_at   | 1200007D18Ri | RIKEN cDNA 1200007D18 gene   | -1.51 | 0.003 | -1.09 | 0.627 | -1.31 | 0.111 |
| 103531_f_at | 1434714_at   | 1300013B24Ri | RIKEN cDNA 1300013B24 gene   | -1.3  | 0.000 | -1.06 | 0.159 | -1.03 | 0.879 |
| 160260_at   | 1448461_a_at | 1500006O09Ri | RIKEN cDNA 1500006O09 gene   | 1.08  | 0.002 | 1.03  | 0.191 | 1.01  | 0.642 |
| 93533_at    | 1425674_a_at | 1500011L16Ri | RIKEN cDNA 1500011L16 gene   | 1.24  | 0.007 | 1.03  | 0.441 | 1.15  | 0.092 |
| 104726_at   | 1451625_a_at | 1700013L23Ri | RIKEN cDNA 1700013L23 gene   | -1.39 | 0.002 | -1.04 | 0.853 | 1.05  | 0.154 |
| 97514_at    | 1435864_a_at | 1810063B05Ri | RIKEN cDNA 1810063B05 gene   | -1.13 | 0.009 | -1.08 | 0.087 | 1.05  | 0.974 |
| 104000_at   | 1424968_at   | 2210023G05Ri | RIKEN cDNA 2210023G05 gene   | -2.28 | 0.000 | 1.06  | 0.435 | 1.1   | 0.457 |
| 100321_f_at | 1449910_at   | 2210418O10Ri | RIKEN cDNA 2210418O10 gene   | -1.29 | 0.000 | 1.18  | 0.674 | 1.15  | 0.235 |
| 102783_at   | 1452799_at   | 2310009E04Ri | RIKEN cDNA 2310009E04 gene   | -1.37 | 0.001 | 1.17  | 0.034 | 1.18  | 0.120 |
| 94366_at    | 1417779_at   | 2310079N02Ri | RIKEN cDNA 2310079N02 gene   | 1.27  | 0.007 | 1.04  | 0.936 | 1.09  | 0.446 |
| 100562_at   | 1448740_at   | 2400006H24Ri | RIKEN cDNA 2400006H24 gene   | -1.42 | 0.006 | -1.18 | 0.176 | -1.07 | 0.615 |
| 160727_at   | 1460672_at   | 2410002F23Ri | RIKEN cDNA 2410002F23 gene   | 1.34  | 0.010 | 1.07  | 0.573 | -1.11 | 0.448 |
| 160425_at   | 1454116_a_at | 2410017I18Ri | RIKEN cDNA 2410017I18 gene   | -1.18 | 0.004 | -1    | 0.389 | -1.08 | 0.029 |
| 96779_f_at  | 1420113_s_at | 2410022L05Ri | RIKEN cDNA 2410022L05 gene   | 1.25  | 0.004 | 1.18  | 0.007 | 1.17  | 0.041 |
| 96329_at    | 1416438_at   | 2410104I19Ri | RIKEN cDNA 2410104I19 gene   | 1.06  | 0.003 | -1.04 | 0.692 | -1.03 | 0.894 |
| 93591_at    | 1448644_at   | 2600002E23Ri | RIKEN cDNA 2600002E23 gene   | -1.15 | 0.009 | -1.05 | 0.322 | -1.03 | 0.651 |
| 95723_r_at  | 1428708_x_at | 2610009E16Ri | RIKEN cDNA 2610009E16 gene   | -1.61 | 0.005 | 1.11  | 0.101 | 1     | 0.171 |
| 100902_at   | 1428357_at   | 2610019F03Ri | RIKEN cDNA 2610019F03 gene   | 1.34  | 0.001 | -1.07 | 0.595 | -1.04 | 0.461 |
| 104119_at   | 1434620_s_at | 2610024E20Ri | RIKEN cDNA 2610024E20 gene   | 1.31  | 0.009 | 1.11  | 0.083 | 1.07  | 0.092 |
| 100115_at   | 1426289_at   | 2610028H07Ri | RIKEN cDNA 2610028H07 gene   | 1.09  | 0.002 | 1.03  | 0.172 | 1.04  | 0.154 |
| 160293_at   | 1459985_at   | 2700038L12Ri | RIKEN cDNA 2700038L12 gene   | -1.09 | 0.009 | 1.11  | 0.382 | 1.25  | 0.064 |
| 104089_at   | 1428529_at   | 2810026P18Ri | RIKEN cDNA 2810026P18 gene   | 1.2   | 0.003 | -1.15 | 0.308 | -1.16 | 0.336 |
| 98756_at    | 1430195_at   | 2810043O03Ri | RIKEN cDNA 2810043O03 gene   | 1.66  | 0.002 | 1.44  | 0.088 | 1.03  | 0.524 |
| 97292_at    | 1452167_at   | 2810407C02Ri | RIKEN cDNA 2810407C02 gene   | -1.09 | 0.003 | -1.01 | 0.081 | 1.07  | 0.645 |
| 103852_at   | 1423958_a_at | 2900001O04Ri | RIKEN cDNA 2900001O04 gene   | -1.39 | 0.003 | -1.16 | 0.022 | -1.08 | 0.212 |
| 103412_at   | 1435321_at   | 3732412D22Ri | RIKEN cDNA 3732412D22 gene   | 1.38  | 0.003 | -1.51 | 0.050 | -1.2  | 0.375 |
| 93801_at    | 1418173_at   | 4631426H08Ri | RIKEN cDNA 4631426H08 gene   | 2.42  | 0.007 | 1.17  | 0.751 | 1.29  | 0.465 |
| 102030_at   | 1420948_s_at | 4833408C14Ri | RIKEN cDNA 4833408C14 gene   | -1.3  | 0.006 | -1.05 | 0.051 | -1.01 | 0.035 |
| 160322_at   | 1423759_a_at | 4930403O06Ri | RIKEN cDNA 4930403O06 gene   | -1.32 | 0.003 | -1.09 | 0.824 | -1.02 | 0.516 |
| 94243_at    | 1437349_at   | 4930432B04Ri | RIKEN cDNA 4930432B04 gene   | -1.26 | 0.008 | 1.06  | 0.502 | -1.03 | 0.057 |
| 103716_at   | 1455072_at   | 4933409L06Ri | RIKEN cDNA 4933409L06 gene   | -1.11 | 0.010 | 1.01  | 0.026 | -1.01 | 0.134 |
| 96614_at    | 1454606_at   | 4933426M11Ri | RIKEN cDNA 4933426M11 gene   | -1.35 | 0.008 | -1.13 | 0.139 | -1.36 | 0.035 |
| 103557_at   | 1426227_s_at | 5730409F24Ri | RIKEN cDNA 5730409F24 gene   | 1.36  | 0.001 | 1.18  | 0.247 | 1.02  | 0.540 |
| 104206_at   | 1453287_at   | 5730557B15Ri | RIKEN cDNA 5730557B15 gene   | -2.02 | 0.000 | -1.43 | 0.091 | -1.25 | 0.169 |
| 103584_at   | 1453015_at   | 5830471E12Ri | RIKEN cDNA 5830471E12 gene   | 1.4   | 0.008 | 1.08  | 0.655 | -1    | 0.465 |
| 96207_at    | 1434005_at   | Rbms1        | RIKEN cDNA 6030432P03 gene   | 1.65  | 0.001 | 1.17  | 0.174 | 1     | 0.473 |
| 100511_at   | 1428242_at   | 6330406L22Ri | RIKEN cDNA 6330406L22 gene   | 1.36  | 0.008 | 1.19  | 0.039 | 1.08  | 0.368 |
| 103200_at   | 1460555_at   | 6330500D04Ri | RIKEN cDNA 6330500D04 gene   | 1.39  | 0.000 | 1.05  | 0.712 | -1.06 | 0.297 |
| 103198_at   | 1455239_at   | 6330512M04Ri | RIKEN cDNA 6330512M04 gene   | 1.49  | 0.003 | 1.04  | 0.231 | -1.06 | 0.552 |
| 95523_at    | 1428333_at   | 6530401D17Ri | RIKEN cDNA 6530401D17 gene   | 2.2   | 0.008 | 1.13  | 0.845 | 1.07  | 0.595 |
| 95887_at    | 1448068_at   | 8430426K15Ri | RIKEN cDNA 8430426K15 gene   | 1.49  | 0.001 | 1.34  | 0.102 | 1.2   | 0.142 |

|             |              |              |                                                                                             |       |       |       |       |       |       |
|-------------|--------------|--------------|---------------------------------------------------------------------------------------------|-------|-------|-------|-------|-------|-------|
| 103435_at   | 1434184_s_at | 9430080K19Ri | RIKEN cDNA 9430080K19 gene                                                                  | 2.34  | 0.000 | 1.26  | 0.203 | 1.21  | 0.284 |
| 94995_at    | 1435695_a_at | A030007L17Ri | RIKEN cDNA A030007L17 gene                                                                  | -1.32 | 0.009 | 1.17  | 0.250 | 1.3   | 0.056 |
| 104362_at   | 1433765_at   | B230113M03Ri | RIKEN cDNA B230113M03 gene                                                                  | -1.7  | 0.002 | -1.4  | 0.081 | -1.45 | 0.040 |
| 103331_at   | 1451085_at   | C030006K11Ri | RIKEN cDNA C030006K11 gene                                                                  | -1.7  | 0.009 | -1.11 | 0.613 | 1.04  | 0.136 |
| 96859_at    | 1423102_a_at | Rnf10        | ring finger protein 10                                                                      | -1.46 | 0.001 | -1.37 | 0.132 | -1.11 | 0.324 |
| 160757_at   | 1428101_at   | Rnf38        | ring finger protein 38                                                                      | 1.43  | 0.003 | 1.25  | 0.087 | 1.11  | 0.750 |
| 101421_at   | 1422888_at   | Rnf5         | ring finger protein 5                                                                       | -1.22 | 0.001 | 1.05  | 0.771 | 1.18  | 0.065 |
| 102782_at   | 1449346_s_at | Riok1        | RIO kinase 1 (yeast)                                                                        | 1.34  | 0.005 | 1.07  | 0.582 | -1.1  | 0.298 |
| 96041_at    | 1422660_at   | Rbm3         | RNA binding motif protein 3                                                                 | 1.84  | 0.001 | 1.08  | 0.099 | 1.08  | 0.299 |
| 97765_g_at  | 1425970_a_at | Ros1         | Ros1 proto-oncogene                                                                         | -1.63 | 0.005 | -1.4  | 0.010 | 1.14  | 0.588 |
| 160422_at   | 1422482_at   | Ruvbl2       | RuvB-like protein 2                                                                         | -1.27 | 0.001 | -1.06 | 0.253 | -1.01 | 0.620 |
| 98600_at    | 1460351_at   | S100a11      | S100 calcium binding protein A11 (calizzarin)                                               | 2.02  | 0.003 | 1.29  | 0.527 | 1.22  | 0.652 |
| 101861_at   | 1420688_a_at | Sgce         | sarcoglycan, epsilon                                                                        | 1.47  | 0.004 | 1.08  | 0.762 | 1.06  | 0.440 |
| 96763_at    | 1448426_at   | Sardh        | Sarcosine dehydrogenase                                                                     | -1.47 | 0.006 | 1     | 0.663 | 1.03  | 0.959 |
| 96759_r_at  | 1424530_at   | Sec14l2      | SEC14-like 2 (S. cerevisiae)                                                                | -1.25 | 0.002 | 1.08  | 0.191 | 1.18  | 0.048 |
| 99617_at    | 1452147_at   | Sec24c       | SEC24 related gene family, member C (S. cerevisiae)                                         | 1.19  | 0.003 | 1.01  | 0.463 | 1     | 0.206 |
| 104365_at   | 1416611_at   | Scamp2       | secretory carrier membrane protein 2                                                        | 1.14  | 0.007 | 1.07  | 0.125 | 1.03  | 0.129 |
| 100596_at   | 1450699_at   | Selenbp1     | selenium binding protein 1                                                                  | -1.32 | 0.005 | -1.08 | 0.877 | -1.14 | 0.247 |
| 160836_at   | 1420824_at   | Sema4d       | sema domain, immunoglobulin domain (Ig), transmembrane domain (TM) and short cytoplasmic dc | 1.12  | 0.002 | 1.1   | 0.059 | -1.1  | 0.949 |
| 96227_at    | 1448506_at   | Serpina6     | serine (or cysteine) proteinase inhibitor, clade A, member 6                                | -1.86 | 0.000 | 1.11  | 0.022 | 1.13  | 0.073 |
| 96060_at    | 1450138_a_at | Serpinb6a    | serine (or cysteine) proteinase inhibitor, clade B, member 6a                               | 2.2   | 0.000 | 1.16  | 0.741 | 1.4   | 0.074 |
| 104700_at   | 1422198_a_at | Shmt1        | serine hydroxymethyl transferase 1 (soluble)                                                | -1.46 | 0.007 | 1.02  | 0.398 | 1.36  | 0.205 |
| 92242_at    | 1419319_at   | Saa4         | serum amyloid A 4                                                                           | -2.7  | 0.010 | 1.17  | 0.763 | 1.26  | 0.544 |
| 103755_at   | 1449084_s_at | Sh3d19       | SH3 domain protein D19                                                                      | -1.12 | 0.008 | -1.22 | 0.135 | -1.21 | 0.117 |
| 92360_at    | 1416861_at   | Stam         | signal transducing adaptor molecule (SH3 domain and ITAM motif) 1                           | -1.32 | 0.004 | -1.05 | 0.486 | -1.11 | 0.047 |
| 160869_at   | 1417892_a_at | Sirt3        | sirtuin 3 (silent mating type information regulation 2, homolog) 3 (S. cerevisiae)          | 1.2   | 0.010 | 1.01  | 0.885 | 1.21  | 0.046 |
| 92578_at    | 1416486_at   | Scye1        | small inducible cytokine subfamily E, member 1                                              | 1.35  | 0.004 | 1.09  | 0.976 | 1.23  | 0.085 |
| 97200_f_at  | 1451294_s_at | Snrpe        | small nuclear ribonucleoprotein E                                                           | 1.22  | 0.002 | 1.02  | 0.605 | 1     | 0.485 |
| 95424_at    | 1422457_s_at | Sumo3        | SMT3 suppressor of mif two 3 homolog 3 (yeast)                                              | -1.21 | 0.005 | 1.05  | 0.474 | -1.01 | 0.709 |
| 100339_at   | 1424898_at   | Slc10a1      | solute carrier family 10 (sodium/bile acid cotransporter family), member 1                  | -1.37 | 0.000 | -1.04 | 0.137 | 1     | 0.285 |
| 100341_g_at | 1450261_a_at | Slc10a1      | solute carrier family 10 (sodium/bile acid cotransporter family), member 1                  | -1.42 | 0.001 | 1.06  | 0.336 | 1.07  | 0.558 |
| 103218_at   | 1451227_a_at | Slc10a3      | solute carrier family 10 (sodium/bile acid cotransporter family), member 3                  | 1.37  | 0.003 | -1.15 | 0.399 | -1.02 | 0.805 |
| 94419_at    | 1448132_at   | Slc19a1      | solute carrier family 19 (sodium/hydrogen exchanger), member 1                              | -1.74 | 0.003 | -1.39 | 0.082 | -1.45 | 0.034 |
| 101397_at   | 1450628_at   | Slc2a8       | solute carrier family 2, (facilitated glucose transporter), member 8                        | -1.45 | 0.006 | -1.34 | 0.034 | -1.01 | 0.342 |
| 100916_at   | 1418118_at   | Slc22a1      | solute carrier family 22 (organic cation transporter), member 1                             | -1.39 | 0.010 | -1.12 | 0.609 | -1.06 | 0.832 |
| 94797_at    | 1451239_a_at | Slc26a1      | solute carrier family 26 (sulfate transporter), member 1                                    | -3.51 | 0.000 | -1.24 | 0.479 | -1.18 | 0.456 |
| 95733_at    | 1451782_a_at | Slc29a1      | solute carrier family 29 (nucleoside transporters), member 1                                | -1.91 | 0.002 | -1.18 | 0.332 | -1.1  | 0.840 |
| 93304_at    | 1448741_at   | Slc3a1       | solute carrier family 3, member 1                                                           | -1.45 | 0.001 | 1.03  | 0.331 | 1.16  | 0.840 |
| 103510_at   | 1449382_at   | Slc6a12      | solute carrier family 6 (neurotransmitter transporter, betaine/GABA), member 12             | -1.24 | 0.008 | 1.03  | 0.899 | 1.07  | 0.670 |
| 95625_at    | 1417116_at   | Slc6a8       | solute carrier family 6 (neurotransmitter transporter, creatine), member 8                  | 1.42  | 0.006 | -1.12 | 0.147 | -1.1  | 0.224 |
| 103934_at   | 1424338_at   | Slc6a13      | solute carrier family 6 (neurotransmitter transporter, GABA), member 13                     | -1.23 | 0.002 | 1.02  | 0.689 | 1.18  | 0.045 |
| 94663_at    | 1440874_at   | Slco5a1      | solute carrier organic anion transporter family, member 5A1                                 | 2.16  | 0.005 | -1.53 | 0.762 | 1.46  | 0.201 |
| 98351_g_at  | 1422256_at   | Sstr2        | somatostatin receptor 2                                                                     | 1.64  | 0.009 | 1.13  | 0.415 | 1.19  | 0.118 |
| 100401_at   | 1420952_at   | Son          | Son cell proliferation protein                                                              | 1.22  | 0.010 | -1.2  | 0.106 | -1.3  | 0.014 |
| 97839_at    | 1429497_s_at | Snx6         | sorting nexin 6                                                                             | 1.2   | 0.010 | 1.1   | 0.334 | 1.11  | 0.254 |
| 93609_at    | 1424876_s_at | Spg20        | spastic paraplegia 20, spartin (Troyer syndrome) homolog (human)                            | -1.31 | 0.002 | -1.09 | 0.235 | -1.17 | 0.034 |
| 98428_at    | 1460400_at   | Spg4         | spastic paraplegia 4 homolog (human)                                                        | -1.21 | 0.007 | 1.06  | 0.867 | 1.08  | 0.684 |
| 96657_at    | 1420502_at   | Sat1         | spermidine/spermine N1-acetyl transferase 1                                                 | 1.24  | 0.000 | 1.11  | 0.018 | 1.22  | 0.016 |
| 100099_at   | 1448621_a_at | Smpd1        | sphingomyelin phosphodiesterase 1, acid lysosomal                                           | -1.24 | 0.005 | -1.01 | 0.661 | -1.04 | 0.471 |
| 94872_at    | 1416635_at   | Smpd13a      | sphingomyelin phosphodiesterase, acid-like 3A                                               | 1.38  | 0.006 | 1.26  | 0.091 | 1.27  | 0.025 |
| 160843_at   | 1460164_at   | Spin         | spindlin                                                                                    | -1.38 | 0.003 | -1.07 | 0.171 | 1.07  | 0.835 |
| 96027_at    | 1449333_at   | Sf3a1        | splicing factor 3a, subunit 1                                                               | -1.25 | 0.007 | 1.06  | 0.478 | -1.01 | 0.775 |
| 102012_at   | 1418895_at   | Scap2        | src family associated phosphoprotein 2                                                      | 1.4   | 0.006 | 1.12  | 0.882 | 1.06  | 0.584 |

|             |              |             |                                                                                          |       |       |       |       |       |       |
|-------------|--------------|-------------|------------------------------------------------------------------------------------------|-------|-------|-------|-------|-------|-------|
| 100279_at   | 1421890_at   | St3gal2     | ST3 beta-galactoside alpha-2,3-sialyltransferase 2                                       | 1.48  | 0.006 | 1.21  | 0.693 | 1.06  | 0.892 |
| 95758_at    | 1415822_at   | Scd2        | stearoyl-Coenzyme A desaturase 2                                                         | 2.16  | 0.001 | 1.15  | 0.715 | 1.17  | 0.423 |
| 95787_s_at  | 1426219_at   | Scp2        | sterol carrier protein 2, liver                                                          | -1.09 | 0.005 | 1.04  | 0.074 | 1.08  | 0.008 |
| 103421_at   | 1423465_at   | Sdfr2       | stromal cell derived factor receptor 2                                                   | 1.12  | 0.003 | 1     | 0.372 | 1.16  | 0.008 |
| 104484_at   | 1419528_at   | Sult2a2     | sulfotransferase family 2A, dehydroepiandrosterone (DHEA)-preferring, member 2           | -1.52 | 0.005 | -1.18 | 0.359 | -1.08 | 0.795 |
| 100538_at   | 1451124_at   | Sod1        | superoxide dismutase 1, soluble                                                          | 1.16  | 0.001 | 1.12  | 0.112 | 1.21  | 0.021 |
| 99111_at    | 1416541_at   | Skd3        | suppressor of K+ transport defect 3                                                      | -1.28 | 0.004 | -1.22 | 0.016 | 1.13  | 0.698 |
| 93586_at    | 1448577_x_at | Syngn2      | synaptogyrin 2                                                                           | -1.27 | 0.008 | -1.03 | 0.874 | 1.02  | 0.201 |
| 96734_at    | 1417834_at   | Synj2bp     | synaptojanin 2 binding protein                                                           | -1.37 | 0.001 | 1.05  | 0.134 | 1.06  | 0.248 |
| 160190_at   | 1415844_at   | Syt4        | synaptotagmin 4                                                                          | -1.89 | 0.002 | -1.49 | 0.021 | -1.6  | 0.025 |
| 103781_at   | 1451573_a_at | Stx4a       | syntaxin 4A (placental)                                                                  | 1.29  | 0.003 | 1.14  | 0.272 | 1.06  | 0.506 |
| 102890_at   | 1416825_at   | Snta1       | syntrophin, acidic 1                                                                     | -1.33 | 0.000 | -1.04 | 0.970 | -1.09 | 0.104 |
| 160331_at   | 1420663_at   | Thpok       | T helper-inducing POZ/Krueppel factor                                                    | -1.44 | 0.005 | -1.23 | 0.103 | -1.17 | 0.092 |
| 103542_at   | 1427051_at   | Tnks1bp1    | tankyrase 1 binding protein 1                                                            | -1.58 | 0.001 | 1.02  | 0.007 | -1.06 | 0.043 |
| 160377_at   | 1423723_s_at | Tardbp      | TAR DNA binding protein                                                                  | -1.21 | 0.003 | 1.04  | 0.763 | -1.08 | 0.266 |
| 94403_at    | 1420196_s_at | Tbc1d14     | TBC1 domain family, member 14                                                            | 1.24  | 0.001 | 1.09  | 0.441 | 1.06  | 0.939 |
| 93105_s_at  | 1452205_x_at | Tcrb-V13    | T-cell receptor beta, variable 13                                                        | 1.82  | 0.009 | 1.08  | 0.376 | 1.11  | 0.189 |
| 94259_at    | 1417998_at   | MGI:1929282 | telomerase binding protein, p23                                                          | 1.06  | 0.010 | -1.08 | 0.851 | -1.12 | 0.362 |
| 102916_s_at | 1450798_at   | Tnxb        | tenascin XB                                                                              | -2.53 | 0.001 | -2.13 | 0.013 | -1.38 | 0.136 |
| 101551_s_at | 1460378_a_at | Tes         | testis derived transcript                                                                | 1.55  | 0.001 | -1.03 | 0.346 | -1.12 | 0.844 |
| 102418_at   | 1417482_at   | Tex19       | testis expressed gene 19                                                                 | -1.27 | 0.004 | -1.09 | 0.612 | -1.35 | 0.020 |
| 95326_at    | 1460717_at   | Tsply1      | testis-specific protein, Y-encoded-like 1                                                | -1.33 | 0.000 | -1.12 | 0.103 | -1.24 | 0.002 |
| 95120_at    | 1418643_at   | Tspan13     | tetraspanin 13                                                                           | 1.2   | 0.005 | -1.22 | 0.664 | -1.15 | 0.928 |
| 93621_at    | 1434400_at   | Tgfb2       | TGF-beta-induced factor 2                                                                | 1.84  | 0.007 | 1.13  | 0.290 | 1.04  | 0.686 |
| 104025_at   | 1448907_at   | Thop1       | thimet oligopeptidase 1                                                                  | -1.08 | 0.006 | -1.12 | 0.120 | 1.08  | 0.922 |
| 96773_at    | 1423247_at   | Txndc4      | thioredoxin domain containing 4 (endoplasmic reticulum)                                  | -1.15 | 0.006 | -1.01 | 0.178 | 1.07  | 0.675 |
| 101356_at   | 1426100_a_at | Tk2         | thymidine kinase 2, mitochondrial                                                        | 1.19  | 0.009 | -1.05 | 0.744 | 1.12  | 0.041 |
| 96426_at    | 1415906_at   | Tmsb4x      | thymosin, beta 4, X chromosome                                                           | 1.53  | 0.006 | 1.31  | 0.061 | 1.2   | 0.305 |
| 94261_at    | 1460545_at   | Thrap3      | thyroid hormone receptor associated protein 3                                            | 1.18  | 0.001 | 1.08  | 0.122 | -1.03 | 0.686 |
| 94948_at    | 1449041_a_at | Trip6       | thyroid hormone receptor interactor 6                                                    | 1.37  | 0.001 | -1.06 | 0.392 | -1.03 | 0.414 |
| 101464_at   | 1460227_at   | Timp1       | tissue inhibitor of metalloproteinase 1                                                  | 1.57  | 0.004 | -1.09 | 0.591 | -1.03 | 0.331 |
| 103255_at   | 1448861_at   | Traf5       | Tnf receptor-associated factor 5                                                         | 1.21  | 0.000 | 1.23  | 0.008 | 1.2   | 0.026 |
| 104755_at   | 1427689_a_at | Tnip1       | TNFAIP3 interacting protein 1                                                            | 1.26  | 0.005 | 1     | 0.403 | -1.02 | 0.840 |
| 93145_at    | 1455505_at   | ---         | Transcribed locus                                                                        | 1.42  | 0.002 | 1.04  | 0.610 | 1.14  | 0.301 |
| 103958_g_at | 1422966_a_at | Tfrc        | transferrin receptor                                                                     | -2.26 | 0.002 | -1.14 | 0.115 | -1.17 | 0.028 |
| 98937_at    | 1452648_at   | Tbrg1       | transforming growth factor beta regulated gene 1                                         | 1.25  | 0.010 | 1.03  | 0.530 | -1.04 | 0.760 |
| 93352_at    | 1455900_x_at | Tgm2        | transglutaminase 2, C polypeptide                                                        | 1.49  | 0.009 | 1.26  | 0.012 | 1.11  | 0.442 |
| 101036_at   | 1455357_x_at | Tomm20      | translocase of outer mitochondrial membrane 20 homolog (yeast)                           | 1.16  | 0.009 | -1.09 | 0.594 | -1.07 | 0.556 |
| 160136_r_at | 1433704_s_at | Tloc1       | translocation protein 1                                                                  | -1.2  | 0.003 | 1.03  | 0.425 | -1    | 0.727 |
| 92531_at    | 1455698_at   | Tloc1       | translocation protein 1                                                                  | -1.82 | 0.003 | -1.02 | 0.666 | 1.01  | 0.514 |
| 103017_at   | 1449670_x_at | Tm7sf1      | transmembrane 7 superfamily member 1                                                     | 1.5   | 0.003 | 1.12  | 0.214 | -1.15 | 0.542 |
| 92437_at    | 1460684_at   | Tm7sf2      | transmembrane 7 superfamily member 2                                                     | -1.19 | 0.001 | 1.07  | 0.973 | 1.06  | 0.771 |
| 96894_at    | 1448422_at   | Tmed4       | transmembrane emp24 protein transport domain containing 4                                | 1.2   | 0.010 | 1.05  | 0.709 | 1.13  | 0.101 |
| 103315_at   | 1434898_at   | Tnrc6a      | trinucleotide repeat containing 6a                                                       | 1.18  | 0.008 | 1.02  | 0.301 | -1.01 | 0.784 |
| 101449_at   | 1424275_s_at | Trim41      | tripartite motif-containing 41                                                           | 1.22  | 0.002 | -1.04 | 0.611 | -1.01 | 0.450 |
| 93827_at    | 1449337_at   | Tdo2        | tryptophan 2,3-dioxygenase                                                               | -1.7  | 0.000 | -1.24 | 0.188 | -1.22 | 0.045 |
| 104682_at   | 1419518_at   | Tuba8       | tubulin, alpha 8                                                                         | 2.44  | 0.001 | -1.18 | 0.310 | 1.05  | 0.632 |
| 160246_at   | 1416950_at   | Tnfaip8     | tumor necrosis factor, alpha-induced protein 8                                           | 1.88  | 0.005 | 1.27  | 0.598 | 1.22  | 0.851 |
| 160376_at   | 1452646_at   | Trp53inp2   | tumor protein p53 inducible nuclear protein 2                                            | -1.63 | 0.003 | -1.05 | 0.764 | -1.21 | 0.157 |
| 100397_at   | 1450792_at   | Tyrobp      | TYRO protein tyrosine kinase binding protein                                             | 1.85  | 0.009 | 1.61  | 0.116 | 1.6   | 0.070 |
| 98053_at    | 1455815_a_at | Ywhab       | tyrosine 3-monooxygenase/tryptophan 5-monooxygenase activation protein, beta polypeptide | 1.27  | 0.002 | 1.31  | 0.073 | 1.27  | 0.015 |
| 95601_at    | 1419385_a_at | Ubqln1      | ubiquilin 1                                                                              | -1.11 | 0.006 | -1.05 | 0.063 | 1.04  | 0.113 |
| 92715_at    | 1419762_at   | Ubd         | ubiquitin D                                                                              | 4.34  | 0.003 | 1.22  | 0.556 | 1.4   | 0.112 |

|             |              |          |                                                                                               |       |       |       |       |       |       |
|-------------|--------------|----------|-----------------------------------------------------------------------------------------------|-------|-------|-------|-------|-------|-------|
| 92820_at    | 1417169_at   | Usp2     | ubiquitin specific protease 2                                                                 | -2.3  | 0.002 | -1.88 | 0.138 | -2.24 | 0.001 |
| 92821_at    | 1417168_a_at | Usp2     | ubiquitin specific protease 2                                                                 | -2.36 | 0.009 | -1.43 | 0.258 | -1.7  | 0.027 |
| 96563_at    | 1448014_s_at | Usp24    | ubiquitin specific protease 24                                                                | -1.37 | 0.008 | -1.05 | 0.394 | -1.02 | 0.705 |
| 95858_at    | 1445116_at   | Usp25    | Ubiquitin specific protease 25                                                                | -1.31 | 0.009 | -1.03 | 0.756 | -1.56 | 0.040 |
| 96286_at    | 1423185_a_at | Ubap1    | ubiquitin-associated protein 1                                                                | -1.33 | 0.008 | -1.1  | 0.713 | -1.11 | 0.584 |
| 93509_at    | 1423106_at   | Ube2b    | ubiquitin-conjugating enzyme E2B, RAD6 homology (S. cerevisiae)                               | -1.34 | 0.002 | -1.06 | 0.154 | 1.05  | 0.983 |
| 93312_at    | 1415688_at   | Ube2g1   | ubiquitin-conjugating enzyme E2G 1                                                            | -1.25 | 0.001 | -1.01 | 0.745 | -1    | 0.577 |
| 97479_at    | 1417908_s_at | Ube2l3   | ubiquitin-conjugating enzyme E2L 3                                                            | -1.29 | 0.000 | -1.15 | 0.166 | -1.08 | 0.228 |
| 102936_at   | 1460329_at   | B4galt6  | UDP-Gal:betaGlcNAc beta 1,4-galactosyltransferase, polypeptide 6                              | 1.98  | 0.002 | 1.66  | 0.042 | 1.41  | 0.129 |
| 93978_at    | 1454842_a_at | B3galnt2 | UDP-GalNAc:betaGlcNAc beta 1,3-galactosaminyltransferase, polypeptide 2                       | -1.7  | 0.007 | -1.03 | 0.935 | -1.17 | 0.440 |
| 103367_at   | 1418655_at   | Galgt1   | UDP-N-acetyl-alpha-D-galactosamine:(N-acetylneuraminy)-galactosylglucosylceramide-beta-1, 4-l | -1.11 | 0.002 | 1.1   | 0.183 | 1.04  | 0.034 |
| 161016_at   | 1455915_at   | Galnt4   | UDP-N-acetyl-alpha-D-galactosamine:polypeptide N-acetylgalactosaminyltransferase 4            | -1.13 | 0.002 | 1.19  | 0.045 | 1.1   | 0.863 |
| 95555_at    | 1418123_at   | Unc119   | unc-119 homolog (C. elegans)                                                                  | 2.05  | 0.001 | 1.17  | 0.605 | 1.28  | 0.005 |
| 96847_at    | 1448447_at   | Vps28    | vacuolar protein sorting 28 (yeast)                                                           | 1.17  | 0.000 | -1.03 | 0.770 | 1.04  | 0.329 |
| 104165_at   | 1418486_at   | Vnn1     | vanin 1                                                                                       | 1.85  | 0.003 | 1.17  | 0.307 | 1.02  | 0.678 |
| 99799_at    | 1422932_a_at | Vav1     | vav 1 oncogene                                                                                | 1.68  | 0.006 | 1.36  | 0.155 | 1.4   | 0.098 |
| 93305_f_at  | 1420624_a_at | Vamp8    | vesicle-associated membrane protein 8                                                         | 1.21  | 0.004 | 1     | 0.597 | 1.15  | 0.023 |
| 94264_at    | 1425419_a_at | Raf1     | v-raf-1 leukemia viral oncogene 1                                                             | 1.25  | 0.010 | 1.08  | 0.598 | 1.08  | 0.530 |
| 102356_at   | 1448418_s_at | Wdr23    | WD repeat domain 23                                                                           | -1.15 | 0.009 | 1     | 0.393 | 1.03  | 0.079 |
| 100523_r_at | 1451230_a_at | Wbp5     | WW domain binding protein 5                                                                   | 1.75  | 0.003 | 1.08  | 0.645 | -1.05 | 0.170 |
| 98767_at    | 1435824_at   | Yy1      | YY1 transcription factor                                                                      | -1.39 | 0.003 | -1.09 | 0.408 | -1.1  | 0.279 |
| 99020_at    | 1457834_at   | Yy1      | YY1 transcription factor                                                                      | -1.59 | 0.006 | 1.06  | 0.989 | -1.01 | 0.634 |
| 95792_at    | 1450190_at   | Zfp106   | zinc finger protein 106                                                                       | 1.08  | 0.005 | 1.01  | 0.171 | 1.03  | 0.150 |
| 92974_at    | 1419207_at   | Zfp37    | zinc finger protein 37                                                                        | 1.62  | 0.003 | 1.48  | 0.001 | 1.18  | 0.044 |
| 161084_at   | 1427104_at   | Zfp612   | zinc finger protein 612                                                                       | 1.76  | 0.002 | 1.16  | 0.472 | 1.06  | 0.750 |
| 104572_at   | 1433910_at   | Zcchc6   | zinc finger, CCHC domain containing 6                                                         | 1.16  | 0.010 | 1.12  | 0.030 | 1.05  | 0.418 |
