# Supplementary material for: Delayed and Accelerated Aging Share Common Longevity Assurance Mechanisms
Source: PubMed Central journal article supplement (PMC2493043; doi:10.1371/journal.pgen.1000161), 2008-08-15
Supplement: pgen.1000161.s006.pdf [file pgen.1000161.s006.pdf]

**Supplementary table S2. A list of probe sets with significant transcriptional changes in the liver of Ercc1-/- as compared to wt littermate controls. FC: fold change, P: p-value**

| Annotation data (from two independent Affymetrix platforms) |              |                     |                                                                               | ERCC1-/- | P     |
|-------------------------------------------------------------|--------------|---------------------|-------------------------------------------------------------------------------|----------|-------|
| 74code                                                      | 430code      | Gene Symbol         | Gene Title                                                                    | FC       | P     |
| 95509_at                                                    | 1451228_a_at | Sycn                | syncollin                                                                     | 18.4     | 0.006 |
| 160744_r_at                                                 | 1431763_a_at | Ctrl                | chymotrypsin-like                                                             | 9.01     | 0.007 |
| 92873_f_at                                                  | 1435507_x_at | Prss2               | protease, serine, 2                                                           | 8.5      | 0.009 |
| 99939_at                                                    | 1417257_at   | Cel                 | carboxyl ester lipase                                                         | 7.21     | 0.008 |
| 92811_at                                                    | 1422846_at   | Rbp2                | retinol binding protein 2, cellular                                           | 6.56     | 0.002 |
| 104742_at                                                   | 1452592_at   | Mgst2               | microsomal glutathione S-transferase 2                                        | 6.09     | 0.001 |
| 102787_at                                                   | 1433485_x_at | Gpr56               | G protein-coupled receptor 56                                                 | 4.84     | 0.000 |
| 102826_at                                                   | 1423556_at   | Akr1b7              | aldo-keto reductase family 1, member B7                                       | 4.8      | 0.001 |
| 160173_at                                                   | 1436713_s_at | ---                 | ---                                                                           | 4.72     | 0.001 |
| 92601_at                                                    | 1415777_at   | Pnliprp1            | pancreatic lipase related protein 1                                           | 4.27     | 0.004 |
| 104603_at                                                   | 1417883_at   | Gstt2               | glutathione S-transferase, theta 2                                            | 4.23     | 0.000 |
| 103279_at                                                   | 1449393_at   | Sh2d1a              | SH2 domain protein 1A                                                         | 3.56     | 0.002 |
| 93020_at                                                    | 1448595_a_at | Rex3                | reduced expression 3                                                          | 3.5      | 0.004 |
| 101872_at                                                   | 1421041_s_at | Gsta2               | glutathione S-transferase, alpha 2 (Yc2)                                      | 3.35     | 0.001 |
| 160172_at                                                   | 1426758_s_at | Gtl2                | GTL2, imprinted maternally expressed untranslated mRNA                        | 3.32     | 0.002 |
| 101990_at                                                   | 1455235_x_at | Ldh2                | lactate dehydrogenase 2, B chain                                              | 3.31     | 0.006 |
| 101451_at                                                   | 1417355_at   | Peg3                | paternally expressed 3                                                        | 3.21     | 0.005 |
| 92252_at                                                    | 1421195_at   | Cckar               | cholecystokinin A receptor                                                    | 3.02     | 0.005 |
| 104094_at                                                   | 1417928_at   | Pdlim4              | PDZ and LIM domain 4                                                          | 3.01     | 0.000 |
| 98035_g_at                                                  | 1449580_s_at | H2-DMb1 /// H2-DMb2 | histocompatibility 2, class II, locus Mb1 /// histocompatibility 2, class II, | 3.01     | 0.000 |
| 92357_at                                                    | 1423378_at   | Adam23              | a disintegrin and metalloprotease domain 23                                   | 2.92     | 0.002 |
| 101587_at                                                   | 1422438_at   | Ephx1               | epoxide hydrolase 1, microsomal                                               | 2.91     | 0.000 |
| 100078_at                                                   | 1436504_x_at | ---                 | ---                                                                           | 2.9      | 0.001 |
| 99370_at                                                    | 1426182_a_at | Klrc1               | killer cell lectin-like receptor subfamily C, member 1                        | 2.9      | 0.004 |
| 94186_at                                                    | 1423602_at   | Traf1               | Tnf receptor-associated factor 1                                              | 2.78     | 0.002 |
| 100016_at                                                   | 1417234_at   | Mmp11               | matrix metalloproteinase 11                                                   | 2.75     | 0.005 |
| 97926_s_at                                                  | 1420715_a_at | Pparg               | peroxisome proliferator activated receptor gamma                              | 2.74     | 0.000 |
| 93284_at                                                    | 1416332_at   | Cirbp               | cold inducible RNA binding protein                                            | 2.66     | 0.003 |
| 98967_at                                                    | 1450779_at   | Fabp7               | fatty acid binding protein 7, brain                                           | 2.64     | 0.010 |
| 160828_at                                                   | 1426858_at   | Inhbb               | inhibin beta-B                                                                | 2.61     | 0.000 |
| 97793_at                                                    | 1420563_at   | Gria3               | glutamate receptor, ionotropic, AMPA3 (alpha 3)                               | 2.59     | 0.000 |
| 102751_at                                                   | 1417455_at   | Tgfb3               | transforming growth factor, beta 3                                            | 2.58     | 0.009 |
| 95523_at                                                    | 1428333_at   | 6530401D17Rik       | RIKEN cDNA 6530401D17 gene                                                    | 2.56     | 0.005 |
| 92537_g_at                                                  | 1455918_at   | ---                 | ---                                                                           | 2.55     | 0.002 |
| 103434_at                                                   | 1431707_a_at | Pscd3               | pleckstrin homology, Sec7 and coiled-coil domains 3                           | 2.54     | 0.002 |
| 96765_at                                                    | 1433924_at   | Peg3                | Paternally expressed 3                                                        | 2.51     | 0.000 |
| 160594_at                                                   | 1418799_a_at | Col17a1             | procollagen, type XVII, alpha 1                                               | 2.5      | 0.005 |
| 102925_at                                                   | 1454737_at   | Dusp9               | dual specificity phosphatase 9                                                | 2.42     | 0.005 |
| 96203_at                                                    | 1424713_at   | Calml4              | calmodulin-like 4                                                             | 2.39     | 0.001 |
| 102195_at                                                   | 1448050_s_at | ---                 | ---                                                                           | 2.37     | 0.004 |
| 97828_at                                                    | 1418377_a_at | MGI:1353606         | Cd27 binding protein (Hindu God of destruction)                               | 2.33     | 0.001 |
| 104267_at                                                   | 1417329_at   | Slc23a2             | solute carrier family 23 (nucleobase transporters), member 2                  | 2.3      | 0.001 |
| 92715_at                                                    | 1419762_at   | Ubd                 | ubiquitin D                                                                   | 2.27     | 0.006 |
| 160158_at                                                   | 1450990_at   | Gpc3                | glypican 3                                                                    | 2.19     | 0.000 |
| 103833_at                                                   | 1448631_a_at | Hipk2               | homeodomain interacting protein kinase 2                                      | 2.14     | 0.005 |
| 97316_at                                                    | 1448382_at   | Ehhadh              | enoyl-Coenzyme A, hydratase/3-hydroxyacyl Coenzyme A dehydrogen               | 2.14     | 0.001 |
| 93384_at                                                    | 1421455_at   | Sntb1               | syntrophin, basic 1                                                           | 2.12     | 0.008 |

|             |              |                              |                                                                        |      |       |
|-------------|--------------|------------------------------|------------------------------------------------------------------------|------|-------|
| 93898_at    | 1419667_at   | Sgcb                         | sarcoglycan, beta (dystrophin-associated glycoprotein)                 | 2.05 | 0.007 |
| 161029_at   | 1426316_at   | 6330416G13Rik                | RIKEN cDNA 6330416G13 gene                                             | 2.02 | 0.001 |
| 162174_at   | 1419349_a_at | Cyp2d9                       | cytochrome P450, family 2, subfamily d, polypeptide 9                  | 2.02 | 0.000 |
| 95555_at    | 1418123_at   | Unc119                       | unc-119 homolog (C. elegans)                                           | 2.02 | 0.000 |
| 102974_at   | 1449498_at   | Marco                        | macrophage receptor with collagenous structure                         | 2    | 0.000 |
| 97352_f_at  | 1435275_at   | Cox6b2                       | cytochrome c oxidase subunit VIb polypeptide 2                         | 2    | 0.000 |
| 99937_at    | 1424234_s_at | Meox2                        | mesenchyme homeobox 2                                                  | 1.99 | 0.003 |
| 97474_r_at  | 1448254_at   | Ptn                          | pleiotrophin                                                           | 1.98 | 0.000 |
| 104165_at   | 1418486_at   | Vnn1                         | vanin 1                                                                | 1.94 | 0.003 |
| 160127_at   | 1420827_a_at | ---                          | ---                                                                    | 1.94 | 0.000 |
| 160547_s_at | 1415996_at   | Txnip                        | thioredoxin interacting protein                                        | 1.92 | 0.005 |
| 96630_at    | 1415938_at   | Spink3                       | serine protease inhibitor, Kazal type 3                                | 1.92 | 0.005 |
| 100348_at   | 1456319_at   | X83313                       | EST X83313                                                             | 1.91 | 0.000 |
| 160544_at   | 1416022_at   | Fabp5                        | fatty acid binding protein 5, epidermal                                | 1.89 | 0.000 |
| 160670_at   | 1448147_at   | Tnfrsf19                     | tumor necrosis factor receptor superfamily, member 19                  | 1.88 | 0.000 |
| 94758_s_at  | 1427767_a_at | Cftr                         | cystic fibrosis transmembrane conductance regulator homolog            | 1.88 | 0.000 |
| 100434_s_at | 1420713_a_at | Mdfi                         | MyoD family inhibitor                                                  | 1.87 | 0.006 |
| 99842_at    | 1421698_a_at | Col19a1                      | procollagen, type XIX, alpha 1                                         | 1.87 | 0.001 |
| 96818_at    | 1421720_a_at | Dtx2                         | deltex 2 homolog (Drosophila)                                          | 1.85 | 0.001 |
| 103435_at   | 1434184_s_at | 9430080K19Rik                | RIKEN cDNA 9430080K19 gene                                             | 1.83 | 0.001 |
| 104011_at   | 1419435_at   | Aox1                         | aldehyde oxidase 1                                                     | 1.81 | 0.004 |
| 160489_at   | 1438855_x_at | ---                          | ---                                                                    | 1.81 | 0.001 |
| 104692_at   | 1420558_at   | Selp                         | selectin, platelet                                                     | 1.79 | 0.002 |
| 95621_at    | 1426284_at   | Krt20                        | keratin 20                                                             | 1.79 | 0.001 |
| 98033_at    | 1448786_at   | 1100001H23Rik                | RIKEN cDNA 1100001H23 gene                                             | 1.79 | 0.000 |
| 104310_at   | 1428245_at   | G6pc3                        | glucose 6 phosphatase, catalytic, 3                                    | 1.78 | 0.002 |
| 99157_at    | 1427895_at   | 2310004N24Rik                | RIKEN cDNA 2310004N24 gene                                             | 1.78 | 0.000 |
| 101975_at   | 1449939_s_at | Dlk1                         | delta-like 1 homolog (Drosophila)                                      | 1.76 | 0.005 |
| 103005_s_at | 1452483_a_at | Cd44                         | CD44 antigen                                                           | 1.75 | 0.004 |
| 104688_at   | 1439323_a_at | Map4k1                       | mitogen activated protein kinase kinase kinase kinase 1                | 1.75 | 0.005 |
| 92730_at    | 1418350_at   | Hbegf                        | heparin-binding EGF-like growth factor                                 | 1.75 | 0.004 |
| 99949_at    | 1424428_at   | A1225782                     | expressed sequence A1225782                                            | 1.75 | 0.005 |
| 100050_at   | 1425895_a_at | Id1                          | inhibitor of DNA binding 1                                             | 1.74 | 0.003 |
| 104156_r_at | 1449363_at   | Atf3                         | activating transcription factor 3                                      | 1.74 | 0.002 |
| 101190_at   | 1450352_at   | Mtnr1a                       | melatonin receptor 1A                                                  | 1.73 | 0.001 |
| 103391_at   | 1455991_at   | Ccbl2                        | cysteine conjugate-beta lyase 2                                        | 1.73 | 0.000 |
| 93287_at    | 1449836_x_at | Biklk                        | Bcl2-interacting killer-like                                           | 1.72 | 0.000 |
| 93691_s_at  | 1425457_a_at | Grb10                        | growth factor receptor bound protein 10                                | 1.72 | 0.010 |
| 102875_at   | 1434563_at   | Rps6kc1                      | ribosomal protein S6 kinase polypeptide 1                              | 1.71 | 0.005 |
| 103040_at   | 1416111_at   | Cd83                         | CD83 antigen                                                           | 1.71 | 0.005 |
| 101116_at   | 1420109_at   | Pip5k2a                      | Phosphatidylinositol-4-phosphate 5-kinase, type II, alpha              | 1.7  | 0.008 |
| 98056_at    | 1449002_at   | Phlda3                       | pleckstrin homology-like domain, family A, member 3                    | 1.7  | 0.004 |
| 160897_at   | 1451359_at   | BC005662                     | cDNA sequence BC005662                                                 | 1.69 | 0.002 |
| 94270_at    | 1448169_at   | Krt1-18                      | keratin complex 1, acidic, gene 18                                     | 1.69 | 0.000 |
| 95758_at    | 1415822_at   | Scd2                         | stearoyl-Coenzyme A desaturase 2                                       | 1.69 | 0.000 |
| 160337_at   | 1415977_at   | MGI:1919030                  | myo-inositol 1-phosphate synthase A1                                   | 1.67 | 0.000 |
| 93869_s_at  | 1419004_s_at | Bcl2a1a /// Bcl2a1b /// Bcl2 | B-cell leukemia/lymphoma 2 related protein A1a /// B-cell leukemia/lym | 1.67 | 0.007 |
| 95373_at    | 1418770_at   | Cd2                          | CD2 antigen                                                            | 1.67 | 0.008 |
| 96085_at    | 1416368_at   | Gsta4                        | glutathione S-transferase, alpha 4                                     | 1.67 | 0.000 |
| 96207_at    | 1434005_at   | Rbms1                        | RIKEN cDNA 6030432P03 gene                                             | 1.67 | 0.001 |
| 98435_at    | 1449383_at   | Adssl1                       | adenylosuccinate synthetase like 1                                     | 1.67 | 0.007 |
| 98495_at    | 1460361_at   | 5033414D02Rik                | RIKEN cDNA 5033414D02 gene                                             | 1.67 | 0.001 |
| 102035_at   | 1430889_a_at | Tpmt                         | thiopurine methyltransferase                                           | 1.66 | 0.009 |

|             |              |               |                                                               |      |       |
|-------------|--------------|---------------|---------------------------------------------------------------|------|-------|
| 95133_at    | 1451095_at   | Asns          | asparagine synthetase                                         | 1.66 | 0.002 |
| 102630_s_at | 1420353_at   | Lta           | lymphotoxin A                                                 | 1.65 | 0.005 |
| 160667_at   | 1434920_a_at | Evl           | Ena-vasodilator stimulated phosphoprotein                     | 1.65 | 0.000 |
| 92262_at    | 1449353_at   | Wig1          | wild-type p53-induced gene 1                                  | 1.65 | 0.001 |
| 94020_at    | 1431292_a_at | Ptk9l         | protein tyrosine kinase 9-like (A6-related protein)           | 1.65 | 0.004 |
| 95927_f_at  | 1439516_at   | 2610201A13Rik | RIKEN cDNA 2610201A13 gene                                    | 1.65 | 0.000 |
| 101173_at   | 1420983_at   | Pctp          | phosphatidylcholine transfer protein                          | 1.64 | 0.007 |
| 94231_at    | 1417419_at   | Ccnd1         | cyclin D1                                                     | 1.64 | 0.008 |
| 95738_at    | 1415836_at   | Aldh18a1      | aldehyde dehydrogenase 18 family, member A1                   | 1.64 | 0.007 |
| 94057_g_at  | 1415964_at   | Scd1          | stearoyl-Coenzyme A desaturase 1                              | 1.63 | 0.000 |
| 96600_at    | 1441618_at   | B130017I01Rik | RIKEN cDNA B130017I01 gene                                    | 1.63 | 0.000 |
| 102910_at   | 1419759_at   | Abcb1a        | ATP-binding cassette, sub-family B (MDR/TAP), member 1A       | 1.62 | 0.000 |
| 92934_at    | 1449126_at   | Zfp90         | zinc finger protein 90                                        | 1.6  | 0.000 |
| 96060_at    | 1450138_a_at | Serpinh6a     | serine (or cysteine) proteinase inhibitor, clade B, member 6a | 1.6  | 0.001 |
| 101206_at   | 1420289_at   | T25656        | expressed sequence T25656                                     | 1.59 | 0.010 |
| 94176_at    | 1425094_a_at | Lhx6          | LIM homeobox protein 6                                        | 1.59 | 0.000 |
| 102013_at   | 1420541_at   | Rdh6          | retinol dehydrogenase 6                                       | 1.58 | 0.001 |
| 103200_at   | 1460555_at   | 6330500D04Rik | RIKEN cDNA 6330500D04 gene                                    | 1.58 | 0.001 |
| 92310_at    | 1427005_at   | Plk2          | polo-like kinase 2 (Drosophila)                               | 1.58 | 0.000 |
| 94289_r_at  | 1426306_a_at | Maged2        | melanoma antigen, family D, 2                                 | 1.58 | 0.000 |
| 102831_s_at | 1449858_at   | ---           | ---                                                           | 1.57 | 0.001 |
| 160626_at   | 1425350_a_at | Myef2         | myelin basic protein expression factor 2, repressor           | 1.57 | 0.000 |
| 92348_at    | 1454675_at   | Thra          | thyroid hormone receptor alpha                                | 1.57 | 0.002 |
| 95887_at    | 1448068_at   | 8430426K15Rik | RIKEN cDNA 8430426K15 gene                                    | 1.57 | 0.003 |
| 103671_at   | 1451814_a_at | Htatip2       | HIV-1 tat interactive protein 2, homolog (human)              | 1.56 | 0.010 |
| 100279_at   | 1421890_at   | St3gal2       | ST3 beta-galactoside alpha-2,3-sialyltransferase 2            | 1.55 | 0.004 |
| 103250_at   | 1417903_at   | Dfna5h        | deafness, autosomal dominant 5 homolog (human)                | 1.55 | 0.007 |
| 103025_at   | 1416380_at   | Mov10         | Moloney leukemia virus 10                                     | 1.54 | 0.000 |
| 160808_at   | 1424119_at   | Prkab1        | protein kinase, AMP-activated, beta 1 non-catalytic subunit   | 1.54 | 0.000 |
| 93702_at    | 1427128_at   | Ptpn23        | protein tyrosine phosphatase, non-receptor type 23            | 1.54 | 0.001 |
| 99057_at    | 1423135_at   | Thy1          | thymus cell antigen 1, theta                                  | 1.54 | 0.001 |
| 99669_at    | 1419573_a_at | Lgals1        | lectin, galactose binding, soluble 1                          | 1.54 | 0.000 |
| 101048_at   | 1422124_a_at | Ptprc         | protein tyrosine phosphatase, receptor type, C                | 1.53 | 0.008 |
| 160101_at   | 1448239_at   | Hmox1         | heme oxygenase (decycling) 1                                  | 1.53 | 0.003 |
| 98018_at    | 1420664_s_at | Procr         | protein C receptor, endothelial                               | 1.53 | 0.000 |
| 100915_at   | 1417472_at   | Myh9          | myosin, heavy polypeptide 9, non-muscle                       | 1.52 | 0.003 |
| 160767_at   | 1417696_at   | Soat1         | sterol O-acyltransferase 1                                    | 1.52 | 0.007 |
| 93188_at    | 1417312_at   | Dkk3          | dickkopf homolog 3 (Xenopus laevis)                           | 1.52 | 0.003 |
| 96041_at    | 1422660_at   | Rbm3          | RNA binding motif protein 3                                   | 1.51 | 0.000 |
| 100626_at   | 1426040_a_at | Odf2          | outer dense fiber of sperm tails 2                            | 1.5  | 0.008 |
| 100988_at   | 1435448_at   | Bcl2l11       | BCL2-like 11 (apoptosis facilitator)                          | 1.5  | 0.006 |
| 104445_at   | 1429159_at   | 4631408O11Rik | RIKEN cDNA 4631408O11 gene                                    | 1.5  | 0.002 |
| 92941_at    | 1436187_at   | 1110054M08Rik | RIKEN cDNA 1110054M08 gene                                    | 1.5  | 0.009 |
| 97820_at    | 1417177_at   | Galk1         | galactokinase 1                                               | 1.5  | 0.000 |
| 97228_at    | 1451421_a_at | MGI:1913299   | leucine zipper domain protein                                 | 1.49 | 0.002 |
| 97943_at    | 1450429_at   | Capn6         | calpain 6                                                     | 1.49 | 0.000 |
| 98790_s_at  | 1450992_a_at | Meis1         | myeloid ecotropic viral integration site 1                    | 1.49 | 0.001 |
| 103293_at   | 1448256_at   | Gosr1         | golgi SNAP receptor complex member 1                          | 1.48 | 0.001 |
| 93968_at    | 1450638_at   | Pdcd5         | programmed cell death 5                                       | 1.48 | 0.000 |
| 100611_at   | 1423547_at   | Lyzs          | lysozyme                                                      | 1.47 | 0.004 |
| 101009_at   | 1435989_x_at | Krt2-8        | keratin complex 2, basic, gene 8                              | 1.47 | 0.000 |
| 160334_at   | 1421993_a_at | 2410001H17Rik | RIKEN cDNA 2410001H17 gene                                    | 1.47 | 0.005 |
| 160652_at   | 1448111_at   | Ctps2         | cytidine 5'-triphosphate synthase 2                           | 1.47 | 0.003 |

|             |              |               |                                                                           |      |       |
|-------------|--------------|---------------|---------------------------------------------------------------------------|------|-------|
| 160762_at   | 1433477_at   | Abr           | active BCR-related gene                                                   | 1.47 | 0.009 |
| 160826_at   | 1416412_at   | Nsmaf         | neutral sphingomyelinase (N-SMase) activation associated factor           | 1.47 | 0.004 |
| 93021_at    | 1428209_at   | LOC406217     | RIKEN cDNA 2410004M13 gene                                                | 1.47 | 0.001 |
| 94088_at    | 1423470_at   | Ptbp2         | polypyrimidine tract binding protein 2                                    | 1.47 | 0.002 |
| 96109_at    | 1448890_at   | Klf2          | Kruppel-like factor 2 (lung)                                              | 1.47 | 0.006 |
| 97489_at    | 1433504_at   | Pygb          | brain glycogen phosphorylase                                              | 1.47 | 0.000 |
| 97889_at    | 1418438_at   | Fabp2         | fatty acid binding protein 2, intestinal                                  | 1.47 | 0.000 |
| 101588_at   | 1415802_at   | Slc16a1       | solute carrier family 16 (monocarboxylic acid transporters), member 1     | 1.46 | 0.004 |
| 102333_at   | 1427226_at   | Epn2          | epsin 2                                                                   | 1.46 | 0.001 |
| 102370_at   | 1434642_at   | Dhrs8         | dehydrogenase/reductase (SDR family) member 8                             | 1.46 | 0.002 |
| 94351_r_at  | 1423627_at   | Nqo1          | NAD(P)H dehydrogenase, quinone 1                                          | 1.46 | 0.003 |
| 95608_at    | 1417492_at   | Ctsb          | cathepsin B                                                               | 1.46 | 0.003 |
| 100928_at   | 1423407_a_at | Fbln2         | fibulin 2                                                                 | 1.45 | 0.000 |
| 103574_at   | 1454708_at   | Ablim1        | actin-binding LIM protein 1                                               | 1.45 | 0.002 |
| 97518_at    | 1448130_at   | Fdft1         | farnesyl diphosphate farnesyl transferase 1                               | 1.45 | 0.000 |
| 104003_at   | 1434518_at   | Phka2         | phosphorylase kinase alpha 2                                              | 1.44 | 0.001 |
| 160415_at   | 1437932_a_at | Cldn1         | claudin 1                                                                 | 1.44 | 0.000 |
| 100507_at   | 1426852_x_at | Nov           | nephroblastoma overexpressed gene                                         | 1.43 | 0.002 |
| 102957_at   | 1418641_at   | Lcp2          | lymphocyte cytosolic protein 2                                            | 1.43 | 0.007 |
| 104322_at   | 1434748_at   | Ckap2         | cytoskeleton associated protein 2                                         | 1.43 | 0.001 |
| 92441_at    | 1417552_at   | Fap           | fibroblast activation protein                                             | 1.43 | 0.006 |
| 94055_at    | 1421313_s_at | Cttn          | cortactin                                                                 | 1.43 | 0.010 |
| 95643_at    | 1415770_at   | Wdr6          | WD repeat domain 6                                                        | 1.43 | 0.000 |
| 100949_at   | 1417688_at   | BC004044      | cDNA sequence BC004044                                                    | 1.42 | 0.002 |
| 103818_at   | 1417392_a_at | Slc7a7        | solute carrier family 7 (cationic amino acid transporter, y+ system), mer | 1.42 | 0.001 |
| 160232_at   | 1418074_at   | St6galnac4    | ST6 (alpha-N-acetyl-neuraminy-2,3-beta-galactosyl-1,3)-N-acetylgalac      | 1.42 | 0.009 |
| 160789_at   | 1423695_at   | 9530090G24Rik | RIKEN cDNA 9530090G24 gene                                                | 1.42 | 0.001 |
| 93081_at    | 1415775_at   | Rbbp7         | retinoblastoma binding protein 7                                          | 1.42 | 0.001 |
| 103016_s_at | 1449164_at   | Cd68          | CD68 antigen                                                              | 1.41 | 0.004 |
| 92256_at    | 1417491_at   | Ctsb          | cathepsin B                                                               | 1.41 | 0.001 |
| 93454_at    | 1419589_at   | C1qr1         | complement component 1, q subcomponent, receptor 1                        | 1.41 | 0.000 |
| 94024_at    | 1424144_at   | Ris2          | retroviral integration site 2                                             | 1.41 | 0.002 |
| 94278_at    | 1415983_at   | Lcp1          | lymphocyte cytosolic protein 1                                            | 1.41 | 0.002 |
| 98007_at    | 1417542_at   | Rps6ka2       | ribosomal protein S6 kinase, polypeptide 2                                | 1.41 | 0.002 |
| 98555_at    | 1448361_at   | Ttc3          | tetratricopeptide repeat domain 3                                         | 1.41 | 0.001 |
| 98990_at    | 1450622_at   | Bcar1         | breast cancer anti-estrogen resistance 1                                  | 1.41 | 0.004 |
| 100523_r_at | 1451230_a_at | Wbp5          | WV domain binding protein 5                                               | 1.4  | 0.000 |
| 104735_at   | 1434881_s_at | Kctd12        | potassium channel tetramerisation domain containing 12                    | 1.4  | 0.003 |
| 160317_at   | 1416591_at   | Rab34         | RAB34, member of RAS oncogene family                                      | 1.4  | 0.007 |
| 93220_at    | 1425475_at   | Col4a5        | procollagen, type IV, alpha 5                                             | 1.4  | 0.006 |
| 94493_at    | 1460569_x_at | Cldn3         | claudin 3                                                                 | 1.4  | 0.000 |
| 96056_at    | 1448605_at   | Rhoc          | ras homolog gene family, member C                                         | 1.4  | 0.000 |
| 96069_at    | 1417294_at   | Akr7a5        | aldo-keto reductase family 7, member A5 (aflatoxin aldehyde reductase)    | 1.4  | 0.002 |
| 97887_at    | 1418069_at   | Apoc2         | apolipoprotein C-II                                                       | 1.4  | 0.000 |
| 98589_at    | 1448318_at   | Adfp          | adipose differentiation related protein                                   | 1.4  | 0.000 |
| 100607_at   | 1416013_at   | Pld3          | phospholipase D3                                                          | 1.39 | 0.007 |
| 93536_at    | 1416837_at   | Bax           | Bcl2-associated X protein                                                 | 1.39 | 0.000 |
| 99416_at    | 1439283_at   | Osbpl9        | Oxysterol binding protein-like 9                                          | 1.39 | 0.007 |
| 100629_at   | 1416842_at   | Gstm5         | glutathione S-transferase, mu 5                                           | 1.38 | 0.000 |
| 101437_at   | 1449336_a_at | Slk           | STE20-like kinase (yeast)                                                 | 1.38 | 0.010 |
| 101850_at   | 1417635_at   | Spa17         | sperm autoantigenic protein 17                                            | 1.38 | 0.001 |
| 160081_at   | 1416807_at   | Rpl36a        | ribosomal protein L36a                                                    | 1.38 | 0.004 |
| 160612_at   | 1423570_at   | Abcg1         | ATP-binding cassette, sub-family G (WHITE), member 1                      | 1.38 | 0.005 |

|             |              |                          |                                                                      |      |       |
|-------------|--------------|--------------------------|----------------------------------------------------------------------|------|-------|
| 94850_at    | 1449968_s_at | MGI:1928939 /// MGI:1928 | acyl-Coenzyme A thioesterase 2, mitochondrial /// acyl-Coenzyme A th | 1.38 | 0.001 |
| 94954_at    | 1423931_s_at | Anapc4                   | anaphase promoting complex subunit 4                                 | 1.38 | 0.001 |
| 95471_at    | 1417649_at   | Cdkn1c                   | cyclin-dependent kinase inhibitor 1C (P57)                           | 1.38 | 0.001 |
| 95674_r_at  | 1428572_at   | Basp1                    | brain abundant, membrane attached signal protein 1                   | 1.38 | 0.000 |
| 98351_g_at  | 1422256_at   | Sstr2                    | somatostatin receptor 2                                              | 1.38 | 0.001 |
| 103557_at   | 1426227_s_at | 5730409F24Rik            | RIKEN cDNA 5730409F24 gene                                           | 1.37 | 0.004 |
| 104280_at   | 1417788_at   | Sncg                     | synuclein, gamma                                                     | 1.37 | 0.000 |
| 92368_at    | 1420401_a_at | Ramp3                    | receptor (calcitonin) activity modifying protein 3                   | 1.37 | 0.001 |
| 94792_at    | 1448061_at   | Msr1                     | Macrophage scavenger receptor 1                                      | 1.37 | 0.001 |
| 97915_at    | 1460341_at   | Plekhh2                  | pleckstrin homology domain containing, family B (evectins) member 2  | 1.37 | 0.002 |
| 103896_f_at | 1418918_at   | Igfbp1                   | insulin-like growth factor binding protein 1                         | 1.36 | 0.006 |
| 161083_at   | 1455733_at   | A130052D22               | RIKEN cDNA A430105I05 gene                                           | 1.36 | 0.007 |
| 92280_at    | 1427385_s_at | Actn1                    | actinin, alpha 1                                                     | 1.36 | 0.000 |
| 92555_at    | 1448501_at   | Tspan6                   | tetraspanin 6                                                        | 1.36 | 0.002 |
| 93330_at    | 1416203_at   | Aqp1                     | aquaporin 1                                                          | 1.36 | 0.006 |
| 97918_at    | 1427243_at   | AA536743                 | expressed sequence AA536743                                          | 1.36 | 0.001 |
| 100059_at   | 1454268_a_at | Cyba                     | cytochrome b-245, alpha polypeptide                                  | 1.35 | 0.002 |
| 103817_at   | 1448592_at   | Crtap                    | cartilage associated protein                                         | 1.35 | 0.000 |
| 104471_at   | 1448928_at   | Hdac6                    | histone deacetylase 6                                                | 1.35 | 0.003 |
| 160506_at   | 1423959_at   | Ropn11                   | ropporin 1-like                                                      | 1.35 | 0.001 |
| 92230_at    | 1424981_at   | Nln                      | neurolysin (metallopeptidase M3 family)                              | 1.35 | 0.007 |
| 95531_at    | 1454890_at   | Amot                     | angiominin                                                           | 1.35 | 0.004 |
| 97203_at    | 1415922_s_at | Mlp                      | MARCKS-like protein                                                  | 1.35 | 0.000 |
| 92608_at    | 1425811_a_at | Csrp1                    | cysteine and glycine-rich protein 1                                  | 1.34 | 0.000 |
| 92632_at    | 1426710_at   | Calm3                    | calmodulin 3                                                         | 1.34 | 0.007 |
| 94504_at    | 1450410_a_at | 4930570C03Rik            | RIKEN cDNA 4930570C03 gene                                           | 1.34 | 0.010 |
| 94733_at    | 1449818_at   | Abcb4                    | ATP-binding cassette, sub-family B (MDR/TAP), member 4               | 1.34 | 0.003 |
| 98594_at    | 1433581_at   | 1190002N15Rik            | RIKEN cDNA 1190002N15 gene                                           | 1.34 | 0.003 |
| 98600_at    | 1460351_at   | S100a11                  | S100 calcium binding protein A11 (calizzarin)                        | 1.34 | 0.001 |
| 93780_at    | 1417316_at   | Them2                    | thioesterase superfamily member 2                                    | 1.33 | 0.001 |
| 95693_at    | 1450048_a_at | Idh2                     | isocitrate dehydrogenase 2 (NADP+), mitochondrial                    | 1.33 | 0.002 |
| 96936_at    | 1415670_at   | Copg                     | coatomer protein complex, subunit gamma                              | 1.33 | 0.010 |
| 97123_at    | 1449854_at   | Nr0b2                    | nuclear receptor subfamily 0, group B, member 2                      | 1.33 | 0.001 |
| 100023_at   | 1417656_at   | Mybl2                    | myeloblastosis oncogene-like 2                                       | 1.32 | 0.010 |
| 102374_at   | 1434027_at   | Dscr112                  | Down syndrome critical region gene 1-like 2                          | 1.32 | 0.001 |
| 103095_at   | 1448227_at   | Grb7                     | growth factor receptor bound protein 7                               | 1.32 | 0.008 |
| 93674_at    | 1416865_at   | Fgd1                     | FYVE, RhoGEF and PH domain containing 1                              | 1.32 | 0.002 |
| 95506_at    | 1419649_s_at | Myo1c                    | myosin IC                                                            | 1.32 | 0.004 |
| 100511_at   | 1428242_at   | 6330406L22Rik            | RIKEN cDNA 6330406L22 gene                                           | 1.31 | 0.004 |
| 92567_at    | 1422437_at   | Col5a2                   | procollagen, type V, alpha 2                                         | 1.31 | 0.002 |
| 93733_r_at  | 1422763_at   | Rgs19ip1                 | regulator of G-protein signaling 19 interacting protein 1            | 1.31 | 0.001 |
| 94872_at    | 1416635_at   | Smpd13a                  | sphingomyelin phosphodiesterase, acid-like 3A                        | 1.31 | 0.002 |
| 95703_at    | 1416443_a_at | Uble1a                   | ubiquitin-like 1 (sentrin) activating enzyme E1A                     | 1.31 | 0.003 |
| 96747_at    | 1449027_at   | Rhou                     | ras homolog gene family, member U                                    | 1.31 | 0.005 |
| 96774_at    | 1434180_at   | Plekhc1                  | pleckstrin homology domain containing, family C (with FERM domain) r | 1.31 | 0.002 |
| 99559_at    | 1415776_at   | ---                      | ---                                                                  | 1.31 | 0.009 |
| 100958_at   | 1454656_at   | Spata13                  | spermatogenesis associated 13                                        | 1.3  | 0.006 |
| 100974_at   | 1449511_a_at | Ssbp4                    | single stranded DNA binding protein 4                                | 1.3  | 0.002 |
| 104222_f_at | 1419805_s_at | Ggps1                    | geranylgeranyl diphosphate synthase 1                                | 1.3  | 0.001 |
| 94440_at    | 1435007_s_at | A1132487                 | expressed sequence A1132487                                          | 1.3  | 0.005 |
| 95597_at    | 1436448_a_at | Ptgs1                    | prostaglandin-endoperoxide synthase 1                                | 1.3  | 0.001 |
| 99009_at    | 1416105_at   | Nnt                      | nicotinamide nucleotide transhydrogenase                             | 1.3  | 0.003 |
| 99962_at    | 1450053_at   | Kif2a                    | RIKEN cDNA D930043N17 gene                                           | 1.3  | 0.003 |

|             |              |               |                                                                            |      |       |
|-------------|--------------|---------------|----------------------------------------------------------------------------|------|-------|
| 160107_at   | 1448736_a_at | Hprt1         | hypoxanthine guanine phosphoribosyl transferase 1                          | 1.29 | 0.003 |
| 160657_at   | 1460669_at   | Ilf3          | interleukin enhancer binding factor 3                                      | 1.29 | 0.000 |
| 160807_at   | 1450504_a_at | Agpat3        | 1-acylglycerol-3-phosphate O-acyltransferase 3                             | 1.29 | 0.001 |
| 93288_at    | 1437148_at   | Arpc2         | actin related protein 2/3 complex, subunit 2                               | 1.29 | 0.001 |
| 93306_at    | 1450740_a_at | Mapre1        | microtubule-associated protein, RP/EB family, member 1                     | 1.29 | 0.001 |
| 93465_at    | 1453076_at   | 9130211I03Rik | RIKEN cDNA 9130211I03 gene                                                 | 1.29 | 0.001 |
| 94712_at    | 1419417_at   | Vegfc         | vascular endothelial growth factor C                                       | 1.29 | 0.002 |
| 95090_at    | 1455752_a_at | 2410001H17Rik | RIKEN cDNA 2410001H17 gene                                                 | 1.29 | 0.002 |
| 95514_at    | 1426897_at   | 2610510H01Rik | RIKEN cDNA 2610510H01 gene                                                 | 1.29 | 0.002 |
| 96075_at    | 1450851_at   | Wdr1          | WD repeat domain 1                                                         | 1.29 | 0.002 |
| 97444_at    | 1422476_at   | Ilf30         | interferon gamma inducible protein 30                                      | 1.29 | 0.002 |
| 98434_at    | 1449066_a_at | Arhgef7       | Rho guanine nucleotide exchange factor (GEF7)                              | 1.29 | 0.002 |
| 98580_at    | 1415678_at   | Ppm1a         | protein phosphatase 1A, magnesium dependent, alpha isoform                 | 1.29 | 0.009 |
| 103816_at   | 1424595_at   | F11r          | F11 receptor                                                               | 1.28 | 0.005 |
| 160757_at   | 1428101_at   | Rnf38         | ring finger protein 38                                                     | 1.28 | 0.005 |
| 160869_at   | 1417892_a_at | Sirt3         | sirtuin 3 (silent mating type information regulation 2, homolog) 3 (S. cer | 1.28 | 0.000 |
| 92216_at    | 1423389_at   | Smad7         | MAD homolog 7 (Drosophila)                                                 | 1.28 | 0.002 |
| 92365_at    | 1449528_at   | Figf          | c-fos induced growth factor                                                | 1.28 | 0.007 |
| 93013_at    | 1435176_a_at | Id2           | inhibitor of DNA binding 2                                                 | 1.28 | 0.000 |
| 94359_at    | 1417965_at   | Plekha1       | pleckstrin homology domain containing, family A (phosphoinositide binc     | 1.28 | 0.000 |
| 96020_at    | 1417063_at   | C1qb          | complement component 1, q subcomponent, beta polypeptide                   | 1.28 | 0.010 |
| 97818_at    | 1460182_at   | Snx4          | sorting nexin 4                                                            | 1.28 | 0.001 |
| 99335_at    | 1423855_x_at | Rpl17         | ribosomal protein L17                                                      | 1.28 | 0.000 |
| 103216_f_at | 1454690_at   | lkbkg         | inhibitor of kappaB kinase gamma                                           | 1.27 | 0.006 |
| 160245_at   | 1453013_at   | 1110034O07Rik | RIKEN cDNA 1110034O07 gene                                                 | 1.27 | 0.009 |
| 94054_at    | 1433908_a_at | Ctnn          | cortactin                                                                  | 1.27 | 0.003 |
| 94061_at    | 1416326_at   | Crip1         | cysteine-rich protein 1 (intestinal)                                       | 1.27 | 0.004 |
| 96284_at    | 1423370_a_at | Csnk1g2       | casein kinase 1, gamma 2                                                   | 1.27 | 0.000 |
| 96358_at    | 1460175_at   | Rps23         | ribosomal protein S23                                                      | 1.27 | 0.001 |
| 96360_at    | 1451168_a_at | Arhgdia       | Rho GDP dissociation inhibitor (GDI) alpha                                 | 1.27 | 0.006 |
| 97274_at    | 1421751_a_at | Psmc14        | proteasome (prosome, macropain) 26S subunit, non-ATPase, 14                | 1.27 | 0.009 |
| 97527_at    | 1417458_s_at | Cks2          | CDC28 protein kinase regulatory subunit 2                                  | 1.27 | 0.002 |
| 99168_at    | 1433429_at   | Pigs          | phosphatidylinositol glycan, class S                                       | 1.27 | 0.008 |
| 101778_at   | 1422192_at   | Gja5          | gap junction membrane channel protein alpha 5                              | 1.26 | 0.001 |
| 102065_at   | 1418243_at   | Fcna          | ficolin A                                                                  | 1.26 | 0.002 |
| 102217_at   | 1449514_at   | Gprk5         | G protein-coupled receptor kinase 5                                        | 1.26 | 0.006 |
| 160171_f_at | 1418073_at   | MGI:1928939   | acyl-Coenzyme A thioesterase 2, mitochondrial                              | 1.26 | 0.000 |
| 92607_at    | 1423294_at   | Mest          | mesoderm specific transcript                                               | 1.26 | 0.005 |
| 93271_s_at  | 1450186_s_at | Gnas          | GNAS (guanine nucleotide binding protein, alpha stimulating) complex       | 1.26 | 0.006 |
| 93753_at    | 1416303_at   | Litaf         | LPS-induced TN factor                                                      | 1.26 | 0.007 |
| 94535_at    | 1450054_at   | ---           | ---                                                                        | 1.26 | 0.001 |
| 96122_at    | 1451322_at   | 2310016A09Rik | RIKEN cDNA 2310016A09 gene                                                 | 1.26 | 0.006 |
| 97106_at    | 1419208_at   | Map3k8        | mitogen activated protein kinase kinase kinase 8                           | 1.26 | 0.001 |
| 97456_at    | 1428082_at   | Acsl5         | acyl-CoA synthetase long-chain family member 5                             | 1.26 | 0.000 |
| 99340_at    | 1455168_a_at | Gnb2-rs1      | guanine nucleotide binding protein, beta 2, related sequence 1             | 1.26 | 0.000 |
| 99491_at    | 1419455_at   | Il10rb        | interleukin 10 receptor, beta                                              | 1.26 | 0.008 |
| 100425_at   | 1418261_at   | Syk           | spleen tyrosine kinase                                                     | 1.25 | 0.005 |
| 102331_at   | 1428372_at   | St5           | suppression of tumorigenicity 5                                            | 1.25 | 0.001 |
| 104014_at   | 1422645_at   | Hfe           | hemochromatosis                                                            | 1.25 | 0.001 |
| 160917_r_at | 1422498_at   | Mageh1        | melanoma antigen, family H, 1                                              | 1.25 | 0.002 |
| 161009_at   | 1434436_at   | Zcwcc2        | zinc finger, CW-type with coiled-coil domain 2                             | 1.25 | 0.004 |
| 93071_at    | 1415869_a_at | Trim28        | tripartite motif protein 28                                                | 1.25 | 0.001 |
| 95034_f_at  | 1436420_a_at | Ipo4          | importin 4                                                                 | 1.25 | 0.009 |

|             |              |               |                                                                 |      |       |
|-------------|--------------|---------------|-----------------------------------------------------------------|------|-------|
| 96172_at    | 1424375_s_at | Gimap4        | GTPase, IMAP family member 4                                    | 1.25 | 0.005 |
| 96426_at    | 1415906_at   | Tmsb4x        | thymosin, beta 4, X chromosome                                  | 1.25 | 0.001 |
| 101137_at   | 1435151_a_at | Rps3          | ribosomal protein S3                                            | 1.24 | 0.000 |
| 102344_s_at | 1424531_a_at | Tcea3         | transcription elongation factor A (SII), 3                      | 1.24 | 0.002 |
| 103027_at   | 1433867_at   | 1810030O07Rik | RIKEN cDNA 1810030O07 gene                                      | 1.24 | 0.000 |
| 104750_at   | 1417292_at   | Ifi47         | interferon gamma inducible protein 47                           | 1.24 | 0.002 |
| 93051_at    | 1448499_a_at | Ephx2         | epoxide hydrolase 2, cytoplasmic                                | 1.24 | 0.004 |
| 95675_at    | 1426759_at   | Map4k3        | mitogen-activated protein kinase kinase kinase 3                | 1.24 | 0.004 |
| 99649_at    | 1455959_s_at | D9Wsu168e     | DNA segment, Chr 9, Wayne State University 168, expressed       | 1.24 | 0.005 |
| 100893_at   | 1460243_at   | Sptlc2        | serine palmitoyltransferase, long chain base subunit 2          | 1.23 | 0.006 |
| 102321_at   | 1418128_at   | Adcy6         | adenylate cyclase 6                                             | 1.23 | 0.008 |
| 93999_at    | 1448357_at   | Snrpg         | small nuclear ribonucleoprotein polypeptide G                   | 1.23 | 0.007 |
| 94442_s_at  | 1418396_at   | Gpsm3         | G-protein signalling modulator 3 (AGS3-like, C. elegans)        | 1.23 | 0.008 |
| 97412_at    | 1428004_at   | 3300001G02Rik | RIKEN cDNA 3300001G02 gene                                      | 1.23 | 0.007 |
| 99119_at    | 1448346_at   | Cfl1          | cofilin 1, non-muscle                                           | 1.23 | 0.002 |
| 101393_at   | 1460330_at   | Anxa3         | annexin A3                                                      | 1.22 | 0.001 |
| 103584_at   | 1453015_at   | 5830471E12Rik | RIKEN cDNA 5830471E12 gene                                      | 1.22 | 0.008 |
| 160078_at   | 1450914_at   | Ppp1r14b      | protein phosphatase 1, regulatory (inhibitor) subunit 14B       | 1.22 | 0.000 |
| 160389_r_at | 1450925_a_at | Rps27l        | ribosomal protein S27-like                                      | 1.22 | 0.000 |
| 160682_at   | 1433685_a_at | 6430706D22Rik | RIKEN cDNA 6430706D22 gene                                      | 1.22 | 0.003 |
| 160814_at   | 1424052_at   | Thap4         | THAP domain containing 4                                        | 1.22 | 0.009 |
| 94079_at    | 1448729_a_at | 4-Sep         | septin 4                                                        | 1.22 | 0.008 |
| 96894_at    | 1448422_at   | Tmed4         | transmembrane emp24 protein transport domain containing 4       | 1.22 | 0.005 |
| 96913_at    | 1426522_at   | Hadhb         | hydroxyacyl-Coenzyme A dehydrogenase/3-ketoacyl-Coenzyme A thio | 1.22 | 0.001 |
| 98333_at    | 1448739_x_at | Rps18         | ribosomal protein S18                                           | 1.22 | 0.001 |
| 100953_at   | 1417586_at   | Timeless      | timeless homolog (Drosophila)                                   | 1.21 | 0.004 |
| 160538_at   | 1422441_x_at | Cdk4          | cyclin-dependent kinase 4                                       | 1.21 | 0.003 |
| 160876_at   | 1417077_at   | Bcap29        | B-cell receptor-associated protein 29                           | 1.21 | 0.000 |
| 92192_s_at  | 1451406_a_at | Pcsk5         | proprotein convertase subtilisin/kexin type 5                   | 1.21 | 0.003 |
| 94853_at    | 1417432_a_at | Gnb1          | guanine nucleotide binding protein, beta 1                      | 1.21 | 0.005 |
| 96865_at    | 1415973_at   | Marcks        | Myristoylated alanine rich protein kinase C substrate           | 1.21 | 0.001 |
| 96911_at    | 1450623_at   | Gnb2          | guanine nucleotide binding protein, beta 2                      | 1.21 | 0.000 |
| 97385_at    | 1419509_a_at | Nagk          | N-acetylglucosamine kinase                                      | 1.21 | 0.001 |
| 98550_at    | 1426853_at   | Set           | SET translocation                                               | 1.21 | 0.003 |
| 160318_at   | 1416580_a_at | Stub1         | STIP1 homology and U-Box containing protein 1                   | 1.2  | 0.006 |
| 160602_at   | 1416843_at   | Pde6d         | phosphodiesterase 6D, cGMP-specific, rod, delta                 | 1.2  | 0.002 |
| 160711_at   | 1419367_at   | Decr1         | 2,4-dienoyl CoA reductase 1, mitochondrial                      | 1.2  | 0.006 |
| 92578_at    | 1416486_at   | Scye1         | small inducible cytokine subfamily E, member 1                  | 1.2  | 0.007 |
| 93626_at    | 1422906_at   | Abcg2         | ATP-binding cassette, sub-family G (WHITE), member 2            | 1.2  | 0.000 |
| 95593_at    | 1415698_at   | Golph2        | golgi phosphoprotein 2                                          | 1.2  | 0.006 |
| 99583_at    | 1449575_a_at | Gstp1         | glutathione S-transferase, pi 1                                 | 1.2  | 0.007 |
| 95646_at    | 1416772_at   | Cpt2          | carnitine palmitoyltransferase 2                                | 1.19 | 0.008 |
| 98038_at    | 1416155_at   | Hmgb3         | high mobility group box 3                                       | 1.19 | 0.010 |
| 98571_s_at  | 1416669_s_at | Naca          | nascent polypeptide-associated complex alpha polypeptide        | 1.19 | 0.001 |
| 100561_at   | 1417380_at   | Iqgap1        | IQ motif containing GTPase activating protein 1                 | 1.18 | 0.009 |
| 101213_at   | 1419441_at   | Arbp          | acidic ribosomal phosphoprotein P0                              | 1.18 | 0.001 |
| 103070_at   | 1416985_at   | ---           | ---                                                             | 1.18 | 0.003 |
| 104328_at   | 1424011_at   | Aqp9          | aquaporin 9                                                     | 1.18 | 0.002 |
| 93588_at    | 1419462_s_at | Gtl3          | gene trap locus 3                                               | 1.18 | 0.006 |
| 93789_s_at  | 1424355_a_at | Sin3b         | transcriptional regulator, SIN3B (yeast)                        | 1.18 | 0.001 |
| 96666_at    | 1423538_at   | Ntan1         | N-terminal Asn amidase                                          | 1.18 | 0.005 |
| 97360_at    | 1448316_at   | Cklfs3        | chemokine-like factor super family 3                            | 1.18 | 0.000 |
| 97803_at    | 1450919_at   | Mpp1          | membrane protein, palmitoylated                                 | 1.18 | 0.002 |

|             |              |               |                                                                       |      |       |
|-------------|--------------|---------------|-----------------------------------------------------------------------|------|-------|
| 98168_at    | 1422613_a_at | Rpl7a         | ribosomal protein L7a                                                 | 1.18 | 0.000 |
| 98335_at    | 1418342_at   | Recc1         | replication factor C 1                                                | 1.18 | 0.010 |
| 99179_at    | 1431145_a_at | Cuedc2        | CUE domain containing 2                                               | 1.18 | 0.005 |
| 100732_at   | 1436760_a_at | Rps8          | ribosomal protein S8                                                  | 1.17 | 0.002 |
| 102644_at   | 1427040_at   | Mdfic         | MyoD family inhibitor domain containing                               | 1.17 | 0.003 |
| 103007_at   | 1416895_at   | Efna1         | ephrin A1                                                             | 1.17 | 0.001 |
| 103452_at   | 1432099_a_at | Prodh2        | proline dehydrogenase (oxidase) 2                                     | 1.17 | 0.002 |
| 103507_at   | 1451161_a_at | Emr1          | EGF-like module containing, mucin-like, hormone receptor-like sequen  | 1.17 | 0.002 |
| 94789_r_at  | 1416256_a_at | Tubb5         | tubulin, beta 5                                                       | 1.17 | 0.001 |
| 96696_at    | 1452787_a_at | Hrmt112       | heterogeneous nuclear ribonucleoproteins methyltransferase-like 2 (S. | 1.17 | 0.005 |
| 96962_at    | 1416546_a_at | Rpl6          | ribosomal protein L6                                                  | 1.17 | 0.000 |
| 103717_at   | 1448146_at   | Wwp2          | WW domain containing E3 ubiquitin protein ligase 2                    | 1.16 | 0.009 |
| 104579_r_at | 1428585_at   | Actn1         | actinin, alpha 1                                                      | 1.16 | 0.007 |
| 160461_f_at | 1416431_at   | Tubb6         | tubulin, beta 6                                                       | 1.16 | 0.007 |
| 160477_at   | 1424085_at   | Ndufa4        | NADH dehydrogenase (ubiquinone) 1 alpha subcomplex, 4                 | 1.16 | 0.004 |
| 93830_at    | 1448103_s_at | Nono          | non-POU-domain-containing, octamer binding protein                    | 1.16 | 0.000 |
| 96526_at    | 1437885_at   | D030029J20Rik | RIKEN cDNA D030029J20 gene                                            | 1.16 | 0.003 |
| 96940_at    | 1448519_at   | Tead2         | TEA domain family member 2                                            | 1.16 | 0.004 |
| 97450_s_at  | 1460167_at   | Aldh7a1       | aldehyde dehydrogenase family 7, member A1                            | 1.16 | 0.001 |
| 98993_at    | 1425542_a_at | Ppp2r5c       | protein phosphatase 2, regulatory subunit B (B56), gamma isoform      | 1.16 | 0.001 |
| 99093_at    | 1456497_x_at | Rps10         | ribosomal protein S10                                                 | 1.16 | 0.005 |
| 99176_at    | 1422516_a_at | Fibp          | fibroblast growth factor (acidic) intracellular binding protein       | 1.16 | 0.008 |
| 99188_at    | 1451130_at   | 2010315L10Rik | RIKEN cDNA 2010315L10 gene                                            | 1.16 | 0.003 |
| 99651_at    | 1460697_s_at | 2610209M04Rik | RIKEN cDNA 2610209M04 gene                                            | 1.16 | 0.005 |
| 100711_at   | 1431177_a_at | Rpl10a        | ribosomal protein L10A                                                | 1.15 | 0.010 |
| 100734_at   | 1449323_a_at | Rpl3          | ribosomal protein L3                                                  | 1.15 | 0.008 |
| 101104_at   | 1415745_a_at | Dscr3         | Down syndrome critical region gene 3                                  | 1.15 | 0.002 |
| 101984_at   | 1460639_a_at | Atox1         | ATX1 (antioxidant protein 1) homolog 1 (yeast)                        | 1.15 | 0.000 |
| 104716_at   | 1448754_at   | Rbp1          | retinol binding protein 1, cellular                                   | 1.15 | 0.002 |
| 160225_at   | 1451135_at   | Gtf2b         | general transcription factor IIB                                      | 1.15 | 0.002 |
| 160371_at   | 1423818_a_at | Arf6ip1       | ADP-ribosylation factor-like 6 interacting protein 1                  | 1.15 | 0.000 |
| 93362_at    | 1450894_a_at | Ap2m1         | adaptor protein complex AP-2, mu1                                     | 1.15 | 0.000 |
| 93754_at    | 1448491_at   | Ech1          | enoyl coenzyme A hydratase 1, peroxisomal                             | 1.15 | 0.008 |
| 94377_at    | 1448942_at   | Gng11         | guanine nucleotide binding protein (G protein), gamma 11              | 1.15 | 0.007 |
| 94397_at    | 1426700_a_at | Usp52         | ubiquitin specific protease 52                                        | 1.15 | 0.009 |
| 97318_at    | 1451040_at   | Hars2         | histidyl tRNA synthetase 2                                            | 1.15 | 0.004 |
| 97538_at    | 1448124_at   | Gusb          | glucuronidase, beta                                                   | 1.15 | 0.009 |
| 100535_at   | 1428362_at   | E130105L11Rik | RIKEN cDNA E130105L11 gene                                            | 1.14 | 0.000 |
| 101992_at   | 1448822_at   | Psmb6         | proteasome (prosome, macropain) subunit, beta type 6                  | 1.14 | 0.008 |
| 103299_at   | 1433678_at   | Al132321      | expressed sequence Al132321                                           | 1.14 | 0.009 |
| 103402_at   | 1452664_a_at | Tm7sf3        | transmembrane 7 superfamily member 3                                  | 1.14 | 0.007 |
| 104708_at   | 1455042_at   | Tbl1x         | Transducin (beta)-like 1 X-linked                                     | 1.14 | 0.006 |
| 160082_s_at | 1423052_at   | Arf4          | ADP-ribosylation factor 4                                             | 1.14 | 0.000 |
| 93840_at    | 1419096_at   | Apom          | apolipoprotein M                                                      | 1.14 | 0.001 |
| 95308_at    | 1418098_at   | Adcy4         | adenylate cyclase 4                                                   | 1.14 | 0.002 |
| 96082_at    | 1423857_at   | Mrpl30        | mitochondrial ribosomal protein L30                                   | 1.14 | 0.002 |
| 96831_at    | 1424650_at   | Pdia5         | protein disulfide isomerase-associated 5                              | 1.14 | 0.006 |
| 100213_f_at | 1455578_x_at | Rpl41         | ribosomal protein L41                                                 | 1.13 | 0.007 |
| 100332_s_at | 1423223_a_at | Prdx6         | peroxiredoxin 6                                                       | 1.13 | 0.002 |
| 103205_at   | 1420635_a_at | Tcirg1        | T-cell, immune regulator 1                                            | 1.13 | 0.001 |
| 104300_at   | 1434998_at   | Iqgap1        | IQ motif containing GTPase activating protein 1                       | 1.13 | 0.004 |
| 104756_at   | 1435431_at   | 2310047M15Rik | RIKEN cDNA 2310047M15 gene                                            | 1.13 | 0.002 |
| 93333_at    | 1417652_a_at | Tbca          | tubulin cofactor a                                                    | 1.13 | 0.007 |



|            |              |                            |                                                                              |       |       |
|------------|--------------|----------------------------|------------------------------------------------------------------------------|-------|-------|
| 93787_f_at | 1448373_at   | Mrpl18                     | mitochondrial ribosomal protein L18                                          | 1.13  | 0.006 |
| 94240_i_at | 1455348_x_at | Rpl29 /// LOC240367 /// LC | ribosomal protein L29 /// similar to ribosomal protein /// similar to riboso | 1.13  | 0.004 |
| 94537_at   | 1428608_at   | Mylc2b                     | myosin light chain, regulatory B                                             | 1.13  | 0.002 |
| 94843_at   | 1427885_at   | Pold4                      | polymerase (DNA-directed), delta 4                                           | 1.13  | 0.009 |
| 95715_at   | 1452674_a_at | Eif3s12                    | eukaryotic translation initiation factor 3, subunit 12                       | 1.13  | 0.001 |
| 96899_at   | 1423737_at   | Ndufs3                     | NADH dehydrogenase (ubiquinone) Fe-S protein 3                               | 1.13  | 0.000 |
| 100120_at  | 1416808_at   | Nid1                       | nidogen 1                                                                    | 1.12  | 0.002 |
| 103882_at  | 1417745_at   | Cpn1                       | carboxypeptidase N, polypeptide 1                                            | 1.12  | 0.001 |
| 160162_at  | 1426529_a_at | Tagln2                     | transgelin 2                                                                 | 1.12  | 0.004 |
| 160308_at  | 1421814_at   | ---                        | ---                                                                          | 1.12  | 0.004 |
| 160696_at  | 1416812_at   | Tia1                       | cytotoxic granule-associated RNA binding protein 1                           | 1.12  | 0.010 |
| 93293_at   | 1423807_a_at | Calm2                      | calmodulin 2                                                                 | 1.12  | 0.001 |
| 96052_at   | 1450721_at   | Acp1                       | acid phosphatase 1, soluble                                                  | 1.12  | 0.008 |
| 98521_at   | 1433916_at   | Vamp3                      | vesicle-associated membrane protein 3                                        | 1.12  | 0.003 |
| 100729_at  | 1448109_a_at | Rpl26                      | ribosomal protein L26                                                        | 1.11  | 0.008 |
| 102961_at  | 1449242_s_at | Hrg                        | histidine-rich glycoprotein                                                  | 1.11  | 0.010 |
| 93270_at   | 1423784_at   | Gars                       | glycyl-tRNA synthetase                                                       | 1.11  | 0.002 |
| 93605_r_at | 1417376_a_at | Igsf4a                     | immunoglobulin superfamily, member 4A                                        | 1.11  | 0.010 |
| 93839_at   | 1418101_a_at | Rtn3                       | reticulon 3                                                                  | 1.11  | 0.001 |
| 160140_at  | 1428282_at   | Tbce                       | tubulin-specific chaperone e                                                 | 1.1   | 0.000 |
| 92872_at   | 1448106_at   | 1200016B17Rik              | RIKEN cDNA 1200016B17 gene                                                   | 1.1   | 0.004 |
| 94834_at   | 1418365_at   | Ctsh                       | cathepsin H                                                                  | 1.1   | 0.002 |
| 95420_at   | 1423706_a_at | ---                        | ---                                                                          | 1.1   | 0.005 |
| 96072_at   | 1419737_a_at | Ldh1                       | lactate dehydrogenase 1, A chain                                             | 1.1   | 0.006 |
| 98075_at   | 1416763_at   | G431001I09Rik              | RIKEN cDNA G431001I09 gene                                                   | 1.1   | 0.005 |
| 99128_at   | 1416278_a_at | Atp5o                      | ATP synthase, H+ transporting, mitochondrial F1 complex, O subunit           | 1.1   | 0.001 |
| 160844_at  | 1450660_at   | Pts                        | 6-pyruvoyl-tetrahydropterin synthase                                         | 1.09  | 0.007 |
| 92544_f_at | 1448442_a_at | Psm3                       | proteasome (prosome, macropain) subunit, alpha type 3                        | 1.09  | 0.007 |
| 94823_at   | 1426660_x_at | Rpl23a                     | ribosomal protein L23a                                                       | 1.09  | 0.010 |
| 96641_at   | 1433478_at   | Psarl                      | presenilin associated, rhomboid-like                                         | 1.09  | 0.007 |
| 101834_at  | 1427060_at   | Mapk3                      | mitogen activated protein kinase 3                                           | 1.08  | 0.001 |
| 93496_at   | 1415840_at   | Elovl5                     | ELOVL family member 5, elongation of long chain fatty acids (yeast)          | 1.08  | 0.002 |
| 93540_at   | 1448333_at   | Adprh                      | ADP-ribosylarginine hydrolase                                                | 1.08  | 0.010 |
| 104313_at  | 1451149_at   | Pgm2                       | phosphoglucomutase 2                                                         | 1.07  | 0.003 |
| 92854_at   | 1449256_a_at | Rab11a                     | RAB11a, member RAS oncogene family                                           | 1.07  | 0.010 |
| 98113_at   | 1448166_a_at | Psmb1                      | proteasome (prosome, macropain) subunit, beta type 1                         | 1.07  | 0.003 |
| 98342_at   | 1448157_s_at | Rpl10                      | ribosomal protein 10                                                         | 1.07  | 0.001 |
| 93028_at   | 1448194_a_at | ---                        | ---                                                                          | 1.06  | 0.004 |
| 100589_at  | 1433470_a_at | Immt                       | inner membrane protein, mitochondrial                                        | 1.05  | 0.003 |
| 93603_at   | 1448849_at   | Mrpl40                     | mitochondrial ribosomal protein L40                                          | 1.05  | 0.005 |
| 95097_at   | 1417157_at   | Actr10                     | ARP10 actin-related protein 10 homolog (S. cerevisiae)                       | 1.05  | 0.005 |
| 96047_at   | 1426225_at   | Rbp4                       | retinol binding protein 4, plasma                                            | 1.05  | 0.003 |
| 99512_at   | 1434251_at   | Cnot1                      | CCR4-NOT transcription complex, subunit 1                                    | 1.05  | 0.001 |
| 92863_at   | 1448121_at   | Wbp2                       | WW domain binding protein 2                                                  | 1.04  | 0.006 |
| 93281_at   | 1422449_s_at | Rcn2                       | reticulocalbin 2                                                             | 1.04  | 0.007 |
| 103707_at  | 1419483_at   | C3ar1                      | complement component 3a receptor 1                                           | 1.03  | 0.002 |
| 103807_at  | 1418202_a_at | Wiz                        | widely-interspaced zinc finger motifs                                        | -1.01 | 0.003 |
| 160402_at  | 1428263_a_at | Tceb2                      | transcription elongation factor B (SIII), polypeptide 2                      | -1.01 | 0.002 |
| 93585_at   | 1417651_at   | Cyp2c29                    | cytochrome P450, family 2, subfamily c, polypeptide 29                       | -1.02 | 0.002 |
| 101389_at  | 1460235_at   | Scarb2                     | scavenger receptor class B, member 2                                         | -1.04 | 0.008 |
| 98480_s_at | 1448975_s_at | Ren1 /// Ren2              | renin 1 structural /// renin 2 tandem duplication of Ren1                    | -1.04 | 0.005 |
| 94794_at   | 1448771_a_at | Fth1                       | ferritin heavy chain 1                                                       | -1.05 | 0.002 |
| 93373_at   | 1417706_at   | Naglu                      | alpha-N-acetylglucosaminidase (Sanfilippo disease IIIB)                      | -1.06 | 0.007 |

|             |              |               |                                                                          |       |       |
|-------------|--------------|---------------|--------------------------------------------------------------------------|-------|-------|
| 94400_at    | 1428501_at   | 1110051M20Rik | RIKEN cDNA 1110051M20 gene                                               | -1.06 | 0.002 |
| 101058_at   | 1417765_a_at | Amy1          | amylase 1, salivary                                                      | -1.07 | 0.005 |
| 101123_at   | 1417999_at   | Itm2b         | integral membrane protein 2B                                             | -1.07 | 0.007 |
| 104072_at   | 1419059_at   | Apcs          | serum amyloid P-component                                                | -1.07 | 0.003 |
| 160088_at   | 1450332_s_at | Fmo5          | flavin containing monooxygenase 5                                        | -1.07 | 0.004 |
| 94318_at    | 1416677_at   | ApoH          | apolipoprotein H                                                         | -1.07 | 0.005 |
| 97446_at    | 1416140_a_at | Dhx30         | DEAH (Asp-Glu-Ala-His) box polypeptide 30                                | -1.07 | 0.004 |
| 99610_at    | 1419360_a_at | Ss18          | synovial sarcoma translocation, Chromosome 18                            | -1.07 | 0.006 |
| 104181_at   | 1420723_at   | Vnn3          | vanin 3                                                                  | -1.08 | 0.002 |
| 104318_at   | 1426770_at   | Pex5          | peroxisome biogenesis factor 5                                           | -1.08 | 0.006 |
| 160355_at   | 1427099_at   | Maz           | MYC-associated zinc finger protein (purine-binding transcription factor) | -1.08 | 0.005 |
| 97998_at    | 1421149_a_at | Drpla         | dentatorubral pallidolusian atrophy                                      | -1.08 | 0.002 |
| 100634_at   | 1448723_at   | Rdh7          | retinol dehydrogenase 7                                                  | -1.09 | 0.001 |
| 102720_at   | 1418788_at   | Tek           | endothelial-specific receptor tyrosine kinase                            | -1.09 | 0.008 |
| 92879_at    | 1416792_at   | Ppm1g         | protein phosphatase 1G (formerly 2C), magnesium-dependent, gamma         | -1.09 | 0.001 |
| 93278_at    | 1449686_s_at | Scp2          | sterol carrier protein 2, liver                                          | -1.09 | 0.002 |
| 96864_at    | 1433878_at   | Mrps26        | mitochondrial ribosomal protein S26                                      | -1.09 | 0.006 |
| 99587_at    | 1415734_at   | Rab7          | RAB7, member RAS oncogene family                                         | -1.09 | 0.007 |
| 104110_at   | 1451197_s_at | Gatad2a       | GATA zinc finger domain containing 2A                                    | -1.1  | 0.005 |
| 160661_at   | 1454621_s_at | 5730472N09Rik | RIKEN cDNA 5730472N09 gene                                               | -1.1  | 0.009 |
| 94049_at    | 1450624_at   | Bhmt          | betaine-homocysteine methyltransferase                                   | -1.1  | 0.002 |
| 95978_at    | 1442145_at   | Gm542         | gene model 542, (NCBI)                                                   | -1.1  | 0.005 |
| 96158_at    | 1451125_at   | BC017133      | cDNA sequence BC017133                                                   | -1.1  | 0.003 |
| 97367_at    | 1449019_at   | Akap1         | A kinase (PRKA) anchor protein 1                                         | -1.1  | 0.001 |
| 98908_at    | 1451073_at   | Sppl3         | Signal peptide peptidase 3                                               | -1.1  | 0.005 |
| 98921_at    | 1451134_a_at | 2410018G23Rik | RIKEN cDNA 2410018G23 gene                                               | -1.1  | 0.002 |
| 100579_s_at | 1434540_a_at | Clta          | clathrin, light polypeptide (Lca)                                        | -1.11 | 0.005 |
| 102002_at   | 1450021_at   | Ubqln2        | ubiquilin 2                                                              | -1.11 | 0.009 |
| 103667_at   | 1434513_at   | Gm542         | gene model 542, (NCBI)                                                   | -1.11 | 0.009 |
| 104121_at   | 1426873_s_at | Jup           | junction plakoglobin                                                     | -1.11 | 0.006 |
| 94014_at    | 1416979_at   | 2510048O06Rik | RIKEN cDNA 2510048O06 gene                                               | -1.11 | 0.006 |
| 96628_at    | 1452157_at   | Eprs          | glutamyl-prolyl-tRNA synthetase                                          | -1.11 | 0.008 |
| 96898_at    | 1433562_s_at | Atp5f1        | ATP synthase, H+ transporting, mitochondrial F0 complex, subunit b, i    | -1.11 | 0.000 |
| 97279_at    | 1435967_s_at | Hibadh        | 3-hydroxyisobutyrate dehydrogenase                                       | -1.11 | 0.000 |
| 99990_at    | 1426487_a_at | Rbbp6         | retinoblastoma binding protein 6                                         | -1.11 | 0.003 |
| 101013_at   | 1436292_a_at | Oaz1          | ornithine decarboxylase antizyme                                         | -1.12 | 0.002 |
| 101025_f_at | 1439016_x_at | Sprr2a        | small proline-rich protein 2A                                            | -1.12 | 0.010 |
| 102271_at   | 1460739_at   | D11Bwg0280e   | DNA segment, Chr 11, Brigham & Women's Genetics 0280e expressec          | -1.12 | 0.004 |
| 102317_at   | 1422895_at   | Vamp4         | vesicle-associated membrane protein 4                                    | -1.12 | 0.001 |
| 104271_at   | 1418554_at   | Admr          | adrenomedullin receptor                                                  | -1.12 | 0.000 |
| 160742_at   | 1415901_at   | Plod3         | procollagen-lysine, 2-oxoglutarate 5-dioxygenase 3                       | -1.12 | 0.005 |
| 161864_f_at | 1441866_s_at | Ptdss1        | phosphatidylserine synthase 1                                            | -1.12 | 0.002 |
| 96956_at    | 1416381_a_at | Prdx5         | peroxiredoxin 5                                                          | -1.12 | 0.005 |
| 97451_at    | 1424024_at   | Mcf2          | multiple coagulation factor deficiency 2                                 | -1.12 | 0.004 |
| 98118_at    | 1422241_a_at | Ndufa1        | NADH dehydrogenase (ubiquinone) 1 alpha subcomplex, 1                    | -1.12 | 0.005 |
| 98538_at    | 1426820_at   | 2610507B11Rik | RIKEN cDNA 2610507B11 gene                                               | -1.12 | 0.008 |
| 104364_at   | 1417016_at   | Mapkapk5      | MAP kinase-activated protein kinase 5                                    | -1.13 | 0.004 |
| 104629_at   | 1417361_at   | Asb3          | ankyrin repeat and SOCS box-containing protein 3                         | -1.13 | 0.007 |
| 104741_at   | 1454787_at   | Zdhhc9        | zinc finger, DHHC domain containing 9                                    | -1.13 | 0.009 |
| 95445_at    | 1448100_at   | 4833439L19Rik | RIKEN cDNA 4833439L19 gene                                               | -1.13 | 0.002 |
| 95902_at    | 1440964_s_at | Al465270      | expressed sequence Al465270                                              | -1.13 | 0.003 |
| 96157_at    | 1429615_at   | Zfp91         | zinc finger protein 91                                                   | -1.13 | 0.002 |
| 98912_at    | 1434597_at   | D13Wsu64e     | DNA segment, Chr 13, Wayne State University 64, expressed                | -1.13 | 0.003 |

|             |              |                         |                                                                     |       |       |
|-------------|--------------|-------------------------|---------------------------------------------------------------------|-------|-------|
| 99469_at    | 1451226_at   | Pex6                    | peroxisomal biogenesis factor 6                                     | -1.13 | 0.002 |
| 100482_at   | 1460691_at   | Zfp598                  | zinc finger protein 598                                             | -1.14 | 0.003 |
| 101572_f_at | 1420553_x_at | Serpina1a               | serine (or cysteine) proteinase inhibitor, clade A, member 1a       | -1.14 | 0.005 |
| 103378_at   | 1448572_at   | Prlpa                   | prolactin-like protein A                                            | -1.14 | 0.001 |
| 160885_at   | 1433519_at   | 8430423A01Rik           | RIKEN cDNA 8430423A01 gene                                          | -1.14 | 0.005 |
| 93601_at    | 1450746_at   | Keap1                   | kelch-like ECH-associated protein 1                                 | -1.14 | 0.007 |
| 96048_at    | 1428326_s_at | Hrsp12                  | heat-responsive protein 12                                          | -1.14 | 0.000 |
| 96757_at    | 1449000_at   | D10Jhu81e               | DNA segment, Chr 10, Johns Hopkins University 81 expressed          | -1.14 | 0.003 |
| 100151_at   | 1455550_x_at | ---                     | ---                                                                 | -1.15 | 0.008 |
| 101887_at   | 1423396_at   | Agt                     | angiotensinogen                                                     | -1.15 | 0.007 |
| 103490_at   | 1450772_at   | Wnt11                   | wingless-related MMTV integration site 11                           | -1.15 | 0.000 |
| 103739_at   | 1428374_at   | MGI:2136405             | glucuronyl C5-epimerase                                             | -1.15 | 0.006 |
| 103893_at   | 1452255_at   | Fbxo38                  | F-box protein 38                                                    | -1.15 | 0.001 |
| 104126_at   | 1415920_at   | Cstf2t                  | cleavage stimulation factor, 3' pre-RNA subunit 2, tau              | -1.15 | 0.000 |
| 104151_at   | 1451522_s_at | Lrch4                   | leucine-rich repeats and calponin homology (CH) domain containing 4 | -1.15 | 0.004 |
| 104296_at   | 1434551_at   | 1110031M08Rik /// LOC38 | RIKEN cDNA 1110031M08 gene /// similar to hypothetical protein      | -1.15 | 0.010 |
| 160198_at   | 1433442_at   | Klh9                    | Kelch-like 9 (Drosophila)                                           | -1.15 | 0.007 |
| 160423_at   | 1420846_at   | Mrps2                   | mitochondrial ribosomal protein S2                                  | -1.15 | 0.000 |
| 160693_at   | 1416387_at   | ---                     | ---                                                                 | -1.15 | 0.002 |
| 94886_at    | 1415692_s_at | Canx                    | calnexin                                                            | -1.15 | 0.009 |
| 96919_at    | 1435732_x_at | Atp6v0c                 | ATPase, H+ transporting, V0 subunit C                               | -1.15 | 0.008 |
| 98022_at    | 1417180_at   | Pcsk7                   | proprotein convertase subtilisin/kexin type 7                       | -1.15 | 0.007 |
| 101367_at   | 1435414_s_at | ---                     | ---                                                                 | -1.16 | 0.006 |
| 102683_at   | 1460654_at   | ---                     | ---                                                                 | -1.16 | 0.005 |
| 103222_at   | 1422824_s_at | Eps8                    | epidermal growth factor receptor pathway substrate 8                | -1.16 | 0.004 |
| 103578_at   | 1431188_a_at | Tom1                    | target of myb1 homolog (chicken)                                    | -1.16 | 0.001 |
| 103900_at   | 1423910_at   | Centg3                  | centaurin, gamma 3                                                  | -1.16 | 0.003 |
| 103947_at   | 1424347_at   | Ppp6c                   | protein phosphatase 6, catalytic subunit                            | -1.16 | 0.001 |
| 94003_at    | 1433676_at   | Prkwnk1                 | protein kinase, lysine deficient 1                                  | -1.16 | 0.006 |
| 94852_at    | 1426236_a_at | Glul                    | glutamate-ammonia ligase (glutamine synthase)                       | -1.16 | 0.006 |
| 95359_at    | 1416364_at   | Hspcb                   | heat shock protein 1, beta                                          | -1.16 | 0.007 |
| 95437_at    | 1426912_at   | Rfwd2                   | ring finger and WD repeat domain 2                                  | -1.16 | 0.001 |
| 95723_r_at  | 1428708_x_at | 2610009E16Rik           | RIKEN cDNA 2610009E16 gene                                          | -1.16 | 0.005 |
| 96019_at    | 1422881_s_at | Sypl                    | synaptophysin-like protein                                          | -1.16 | 0.002 |
| 96073_at    | 1416534_at   | Dpf2                    | D4, zinc and double PHD fingers family 2                            | -1.16 | 0.001 |
| 96098_at    | 1422819_at   | Mrpl36                  | mitochondrial ribosomal protein L36                                 | -1.16 | 0.000 |
| 98147_at    | 1448311_at   | Usp5                    | ubiquitin specific protease 5 (isopeptidase T)                      | -1.16 | 0.002 |
| 100088_at   | 1433540_x_at | Ppp1cb                  | protein phosphatase 1, catalytic subunit, beta isoform              | -1.17 | 0.001 |
| 101866_at   | 1425507_at   | Arfrp1                  | ADP-ribosylation factor related protein 1                           | -1.17 | 0.004 |
| 102262_r_at | 1422866_at   | Col13a1                 | procollagen, type XIII, alpha 1                                     | -1.17 | 0.010 |
| 102789_at   | 1450333_a_at | Gata2                   | GATA binding protein 2                                              | -1.17 | 0.009 |
| 103670_at   | 1418821_at   | Cyp2a12                 | cytochrome P450, family 2, subfamily a, polypeptide 12              | -1.17 | 0.000 |
| 104375_at   | 1435026_at   | Spock2                  | sparc/osteonectin, cwcv and kazal-like domains proteoglycan 2       | -1.17 | 0.004 |
| 160672_at   | 1423612_at   | Al462438                | expressed sequence Al462438                                         | -1.17 | 0.002 |
| 160678_at   | 1454604_s_at | Tspan12                 | tetraspanin 12                                                      | -1.17 | 0.002 |
| 93054_at    | 1428063_at   | 1110054N06Rik           | RIKEN cDNA 1110054N06 gene                                          | -1.17 | 0.000 |
| 95320_at    | 1420788_at   | Klrg1                   | killer cell lectin-like receptor subfamily G, member 1              | -1.17 | 0.004 |
| 99365_at    | 1436351_at   | Coo3                    | coenzyme Q3 homolog, methyltransferase (yeast)                      | -1.17 | 0.005 |
| 100474_at   | 1420377_at   | St8sia2                 | ST8 alpha-N-acetyl-neuraminide alpha-2,8-sialyltransferase 2        | -1.18 | 0.001 |
| 102340_at   | 1423595_at   | Mina                    | myc induced nuclear antigen                                         | -1.18 | 0.001 |
| 102943_at   | 1428612_at   | Apg7l                   | autophagy 7-like (S. cerevisiae)                                    | -1.18 | 0.008 |
| 103585_at   | 1454794_at   | ---                     | ---                                                                 | -1.18 | 0.007 |
| 104528_at   | 1416651_at   | Znhit2                  | zinc finger, HIT domain containing 2                                | -1.18 | 0.005 |

|             |              |               |                                                                               |       |       |
|-------------|--------------|---------------|-------------------------------------------------------------------------------|-------|-------|
| 92816_r_at  | 1434985_a_at | Eif4a1        | eukaryotic translation initiation factor 4A1                                  | -1.18 | 0.010 |
| 93434_at    | 1449816_at   | Sult5a1       | sulfotransferase family 5A, member 1                                          | -1.18 | 0.000 |
| 93599_at    | 1423408_a_at | 2500003M10Rik | RIKEN cDNA 2500003M10 gene                                                    | -1.18 | 0.005 |
| 94552_at    | 1448642_at   | Pcbp1         | poly(rC) binding protein 1                                                    | -1.18 | 0.009 |
| 95603_at    | 1416049_at   | Gldc          | glycine decarboxylase                                                         | -1.18 | 0.008 |
| 95875_at    | 1459220_at   | C78651        | expressed sequence C78651                                                     | -1.18 | 0.001 |
| 96341_at    | 1424104_at   | MGI:1915842   | GCIP-interacting protein p29                                                  | -1.18 | 0.010 |
| 97253_at    | 1417106_at   | Tpd52l2       | tumor protein D52-like 2                                                      | -1.18 | 0.004 |
| 100339_at   | 1424898_at   | Slc10a1       | solute carrier family 10 (sodium/bile acid cotransporter family), member      | -1.19 | 0.002 |
| 100500_at   | 1416888_at   | Fadd          | Fas (TNFRSF6)-associated via death domain                                     | -1.19 | 0.002 |
| 101931_at   | 1416372_at   | Ptdss1        | phosphatidylserine synthase 1                                                 | -1.19 | 0.003 |
| 103033_at   | 1418021_at   | C4            | complement component 4 (within H-2S)                                          | -1.19 | 0.001 |
| 103056_at   | 1454817_at   | Wdr50         | WD repeat domain 50                                                           | -1.19 | 0.006 |
| 103999_at   | 1455326_at   | 4932416N17Rik | RIKEN cDNA 4932416N17 gene                                                    | -1.19 | 0.000 |
| 160193_at   | 1424235_at   | Ormdl2        | ORM1-like 2 ( <i>S. cerevisiae</i> )                                          | -1.19 | 0.002 |
| 160949_at   | 1448725_at   | Parg          | poly (ADP-ribose) glycohydrolase                                              | -1.19 | 0.003 |
| 92660_f_at  | 1416943_at   | Ube2e1        | ubiquitin-conjugating enzyme E2E 1, UBC4/5 homolog (yeast)                    | -1.19 | 0.000 |
| 92757_at    | 1427674_a_at | Sez6          | seizure related gene 6                                                        | -1.19 | 0.003 |
| 94241_at    | 1423701_at   | Coasy         | Coenzyme A synthase                                                           | -1.19 | 0.001 |
| 94501_at    | 1420822_s_at | Sgpp1         | sphingosine-1-phosphate phosphatase 1                                         | -1.19 | 0.005 |
| 94957_at    | 1426345_at   | Prepl         | prolyl endopeptidase-like                                                     | -1.19 | 0.003 |
| 95469_at    | 1417987_at   | Btd           | biotinidase                                                                   | -1.19 | 0.003 |
| 96603_at    | 1420832_at   | Qscn6         | quiescin Q6                                                                   | -1.19 | 0.001 |
| 96616_at    | 1448763_at   | Atad1         | ATPase family, AAA domain containing 1                                        | -1.19 | 0.000 |
| 97249_at    | 1417167_at   | Exosc5        | exosome component 5                                                           | -1.19 | 0.007 |
| 97734_at    | 1449569_at   | Thpo          | thrombopoietin                                                                | -1.19 | 0.003 |
| 98104_at    | 1416769_s_at | Atp6v0b       | ATPase, H <sup>+</sup> transporting, V0 subunit B                             | -1.19 | 0.009 |
| 98142_at    | 1434604_at   | Eif5b         | eukaryotic translation initiation factor 5B                                   | -1.19 | 0.005 |
| 100912_at   | 1452839_at   | 2410012M04Rik | RIKEN cDNA 2410012M04 gene                                                    | -1.2  | 0.009 |
| 102206_at   | 1422787_at   | Fkbp1         | FK506 binding protein-like                                                    | -1.2  | 0.006 |
| 102895_at   | 1453576_at   | Nipbl         | Nipped-B homolog ( <i>Drosophila</i> )                                        | -1.2  | 0.010 |
| 160253_at   | 1423754_at   | Ifitm3        | interferon induced transmembrane protein 3                                    | -1.2  | 0.003 |
| 160930_at   | 1416500_at   | Sacm11        | SAC1 (suppressor of actin mutations 1, homolog)-like ( <i>S. cerevisiae</i> ) | -1.2  | 0.000 |
| 95071_at    | 1449180_at   | Kcmf1         | potassium channel modulatory factor 1                                         | -1.2  | 0.001 |
| 95591_at    | 1434703_at   | Extl3         | exostoses (multiple)-like 3                                                   | -1.2  | 0.003 |
| 96232_at    | 1451231_a_at | Cul2          | cullin 2                                                                      | -1.2  | 0.006 |
| 96259_at    | 1417386_at   | Npepps        | aminopeptidase puromycin sensitive                                            | -1.2  | 0.008 |
| 98995_at    | 1460207_s_at | E2f5          | E2F transcription factor 5                                                    | -1.2  | 0.002 |
| 101053_at   | 1424036_at   | 2610031L17Rik | RIKEN cDNA 2610031L17 gene                                                    | -1.21 | 0.002 |
| 101862_at   | 1419590_at   | Cyp2b9        | cytochrome P450, family 2, subfamily b, polypeptide 9                         | -1.21 | 0.001 |
| 102003_at   | 1415709_s_at | Gbf1          | golgi-specific brefeldin A-resistance factor 1                                | -1.21 | 0.005 |
| 102070_at   | 1460734_at   | Col9a3        | procollagen, type IX, alpha 3                                                 | -1.21 | 0.002 |
| 102952_g_at | 1427505_a_at | Cradd         | CASP2 and RIPK1 domain containing adaptor with death domain                   | -1.21 | 0.005 |
| 104070_at   | 1434037_s_at | Pcaf          | p300/CBP-associated factor                                                    | -1.21 | 0.000 |
| 104484_at   | 1419528_at   | Sult2a2       | sulfotransferase family 2A, dehydroepiandrosterone (DHEA)-preferring          | -1.21 | 0.000 |
| 104583_at   | 1423300_at   | Zdhhc6        | zinc finger, DHHC domain containing 6                                         | -1.21 | 0.010 |
| 104740_at   | 1424427_at   | D1Erd251e     | DNA segment, Chr 1, ERATO Doi 251, expressed                                  | -1.21 | 0.008 |
| 160217_at   | 1452159_at   | 2310001A20Rik | RIKEN cDNA 2310001A20 gene                                                    | -1.21 | 0.001 |
| 92411_at    | 1433843_at   | Hs1bp3        | HS1 binding protein 3                                                         | -1.21 | 0.002 |
| 92612_at    | 1449112_at   | Slc27a5       | solute carrier family 27 (fatty acid transporter), member 5                   | -1.21 | 0.000 |
| 95019_at    | 1418186_at   | Gstt1         | glutathione S-transferase, theta 1                                            | -1.21 | 0.005 |
| 98029_at    | 1434658_at   | 3110056O03Rik | RIKEN cDNA 3110056O03 gene                                                    | -1.21 | 0.003 |
| 98962_at    | 1419560_at   | Lipc          | lipase, hepatic                                                               | -1.21 | 0.010 |

|             |              |               |                                                                           |       |       |
|-------------|--------------|---------------|---------------------------------------------------------------------------|-------|-------|
| 101067_at   | 1428709_a_at | Mrpl24        | mitochondrial ribosomal protein L24                                       | -1.22 | 0.001 |
| 102642_at   | 1417584_at   | Slc11a2       | solute carrier family 11 (proton-coupled divalent metal ion transporters) | -1.22 | 0.009 |
| 104381_at   | 1450444_a_at | Nr1h3         | nuclear receptor subfamily 1, group H, member 3                           | -1.22 | 0.001 |
| 160267_at   | 1448882_at   | 0610009E20Rik | RIKEN cDNA 0610009E20 gene                                                | -1.22 | 0.001 |
| 160362_at   | 1433576_at   | Mat2a         | methionine adenosyltransferase II, alpha                                  | -1.22 | 0.000 |
| 160512_at   | 1423678_at   | BC017643      | cDNA sequence BC017643                                                    | -1.22 | 0.003 |
| 160738_at   | 1452835_a_at | Polrmt        | polymerase (RNA) mitochondrial (DNA directed)                             | -1.22 | 0.001 |
| 160809_at   | 1423047_at   | Tollip        | toll interacting protein                                                  | -1.22 | 0.001 |
| 92195_at    | 1451639_at   | Cebpg         | CCAAT/enhancer binding protein (C/EBP), gamma                             | -1.22 | 0.006 |
| 93493_at    | 1423645_a_at | ---           | ---                                                                       | -1.22 | 0.001 |
| 93624_at    | 1428776_at   | 8430417G17Rik | RIKEN cDNA 8430417G17 gene                                                | -1.22 | 0.001 |
| 96160_at    | 1417636_at   | Slc6a9        | solute carrier family 6 (neurotransmitter transporter, glycine), member 9 | -1.22 | 0.000 |
| 96346_at    | 1448842_at   | Cdo1          | cysteine dioxygenase 1, cytosolic                                         | -1.22 | 0.000 |
| 96732_at    | 1438669_at   | Wdr40a        | WD repeat domain 40A                                                      | -1.22 | 0.004 |
| 97418_at    | 1418914_s_at | Bhmt2         | betaine-homocysteine methyltransferase 2                                  | -1.22 | 0.003 |
| 97846_at    | 1460429_at   | Cdc5l         | cell division cycle 5-like (S. pombe)                                     | -1.22 | 0.001 |
| 97866_at    | 1423217_a_at | 2510049I19Rik | RIKEN cDNA 2510049I19 gene                                                | -1.22 | 0.001 |
| 98767_at    | 1435824_at   | Yy1           | YY1 transcription factor                                                  | -1.22 | 0.001 |
| 99183_at    | 1433591_at   | AI553587      | expressed sequence AI553587                                               | -1.22 | 0.000 |
| 100400_at   | 1416668_at   | 4921531G14Rik | RIKEN cDNA 4921531G14 gene                                                | -1.23 | 0.004 |
| 100515_at   | 1418518_at   | Furin         | furin (paired basic amino acid cleaving enzyme)                           | -1.23 | 0.000 |
| 101127_at   | 1419628_at   | Chx10         | C. elegans ceh-10 homeo domain containing homolog                         | -1.23 | 0.003 |
| 102193_at   | 1435390_at   | ---           | ---                                                                       | -1.23 | 0.001 |
| 103931_at   | 1418611_at   | Grca          | gene rich cluster, A gene                                                 | -1.23 | 0.004 |
| 104558_at   | 1454932_at   | Rcor1         | REST corepressor 1                                                        | -1.23 | 0.000 |
| 160302_at   | 1451238_at   | 1200003C05Rik | RIKEN cDNA 1200003C05 gene                                                | -1.23 | 0.010 |
| 160525_f_at | 1426730_a_at | Prlpk         | prolactin-like protein K                                                  | -1.23 | 0.007 |
| 160536_at   | 1424132_at   | Hras1         | Harvey rat sarcoma virus oncogene 1                                       | -1.23 | 0.005 |
| 93419_at    | 1425066_a_at | 1110061O04Rik | RIKEN cDNA 1110061O04 gene                                                | -1.23 | 0.001 |
| 93708_at    | 1421646_a_at | Pias3         | protein inhibitor of activated STAT 3                                     | -1.23 | 0.001 |
| 94292_at    | 1419912_s_at | Strap         | Serine/threonine kinase receptor associated protein                       | -1.23 | 0.010 |
| 96088_at    | 1448154_at   | Ndrp2         | N-myc downstream regulated gene 2                                         | -1.23 | 0.000 |
| 96325_at    | 1451078_at   | 2510039O18Rik | RIKEN cDNA 2510039O18 gene                                                | -1.23 | 0.008 |
| 96891_at    | 1417082_at   | Anp32b        | acidic nuclear phosphoprotein 32 family, member B                         | -1.23 | 0.002 |
| 97492_at    | 1415738_at   | 0610040B21Rik | RIKEN cDNA 0610040B21 gene                                                | -1.23 | 0.004 |
| 98506_r_at  | 1422492_at   | Cpox          | coproporphyrinogen oxidase                                                | -1.23 | 0.001 |
| 99490_at    | 1423970_at   | Thoc3         | THO complex 3                                                             | -1.23 | 0.001 |
| 102210_at   | 1437651_a_at | Dtnb          | dystrobrevin, beta                                                        | -1.24 | 0.001 |
| 103341_at   | 1416563_at   | Ctps          | cytidine 5'-triphosphate synthase                                         | -1.24 | 0.008 |
| 104403_at   | 1434162_at   | 2700078E11Rik | RIKEN cDNA 2700078E11 gene                                                | -1.24 | 0.000 |
| 104754_at   | 1448778_at   | Sfrs4         | splicing factor, arginine/serine-rich 4 (SRp75)                           | -1.24 | 0.003 |
| 160351_at   | 1451243_at   | Rnpep         | arginyl aminopeptidase (aminopeptidase B)                                 | -1.24 | 0.005 |
| 160898_at   | 1424751_at   | Abt1          | activator of basal transcription                                          | -1.24 | 0.003 |
| 92884_at    | 1435638_at   | ---           | ---                                                                       | -1.24 | 0.003 |
| 93482_at    | 1425506_at   | Mylk          | myosin, light polypeptide kinase                                          | -1.24 | 0.000 |
| 93579_at    | 1417064_at   | Jagn1         | jagunal homolog 1 (Drosophila)                                            | -1.24 | 0.004 |
| 95479_at    | 1448505_at   | MGI:1927354   | nuclear DNA binding protein                                               | -1.24 | 0.001 |
| 96712_at    | 1448321_at   | Smoc1         | SPARC related modular calcium binding 1                                   | -1.24 | 0.002 |
| 96763_at    | 1448426_at   | Sardh         | Sarcosine dehydrogenase                                                   | -1.24 | 0.001 |
| 97933_at    | 1460695_a_at | 2300006M17Rik | RIKEN cDNA 2300006M17 gene                                                | -1.24 | 0.003 |
| 99121_at    | 1452247_at   | Fxr1h         | fragile X mental retardation gene 1, autosomal homolog                    | -1.24 | 0.001 |
| 100935_at   | 1418437_a_at | Tcf14         | transcription factor-like 4                                               | -1.25 | 0.002 |
| 101926_at   | 1417216_at   | ---           | ---                                                                       | -1.25 | 0.000 |

|             |              |               |                                                                            |       |       |
|-------------|--------------|---------------|----------------------------------------------------------------------------|-------|-------|
| 102824_g_at | 1424631_a_at | Ighg          | Immunoglobulin heavy chain (gamma polypeptide)                             | -1.25 | 0.004 |
| 103591_at   | 1418593_at   | Taf6          | TAF6 RNA polymerase II, TATA box binding protein (TBP)-associated I        | -1.25 | 0.003 |
| 104494_at   | 1454736_at   | 4921515A04Rik | RIKEN cDNA 4921515A04 gene                                                 | -1.25 | 0.006 |
| 160748_at   | 1448431_at   | Asb6          | ankyrin repeat and SOCS box-containing protein 6                           | -1.25 | 0.002 |
| 93512_f_at  | 1438292_x_at | Adk           | adenosine kinase                                                           | -1.25 | 0.000 |
| 93806_at    | 1428107_at   | Sh3bgrl       | SH3-binding domain glutamic acid-rich protein like                         | -1.25 | 0.005 |
| 94471_r_at  | 1422497_at   | Slc30a5       | solute carrier family 30 (zinc transporter), member 5                      | -1.25 | 0.000 |
| 94832_at    | 1415963_at   | Hnrph2        | heterogeneous nuclear ribonucleoprotein H2                                 | -1.25 | 0.001 |
| 94861_at    | 1449718_s_at | 4930453N24Rik | RIKEN cDNA 4930453N24 gene                                                 | -1.25 | 0.003 |
| 96124_at    | 1428327_at   | 2310001H13Rik | RIKEN cDNA 2310001H13 gene                                                 | -1.25 | 0.006 |
| 96546_r_at  | 1435586_at   | A730042J05Rik | RIKEN cDNA A730042J05 gene                                                 | -1.25 | 0.000 |
| 96787_at    | 1424758_s_at | Serpina10     | serine (or cysteine) proteinase inhibitor, clade A (alpha-1 antiproteinase | -1.25 | 0.008 |
| 100570_at   | 1420535_a_at | 6330412F12Rik | RIKEN cDNA 6330412F12 gene                                                 | -1.26 | 0.010 |
| 101905_at   | 1415769_at   | Itch          | itchy                                                                      | -1.26 | 0.000 |
| 104157_at   | 1435369_at   | C78212        | expressed sequence C78212                                                  | -1.26 | 0.008 |
| 104174_at   | 1459546_s_at | Enpp1         | ectonucleotide pyrophosphatase/phosphodiesterase 1                         | -1.26 | 0.003 |
| 104766_at   | 1418305_s_at | Nola1         | nucleolar protein family A, member 1 (H/ACA small nucleolar RNPs)          | -1.26 | 0.009 |
| 160151_i_at | 1424462_at   | 1200009B18Rik | RIKEN cDNA 1200009B18 gene                                                 | -1.26 | 0.003 |
| 160228_at   | 1429555_at   | 1110019C08Rik | RIKEN cDNA 1110019C08 gene                                                 | -1.26 | 0.007 |
| 161129_r_at | 1423948_at   | Bag2          | Bcl2-associated athanogene 2                                               | -1.26 | 0.010 |
| 93095_at    | 1416176_at   | Hmgb1         | high mobility group box 1                                                  | -1.26 | 0.000 |
| 93845_at    | 1423863_at   | Abcf2         | ATP-binding cassette, sub-family F (GCN20), member 2                       | -1.26 | 0.006 |
| 94419_at    | 1448132_at   | Slc19a1       | solute carrier family 19 (sodium/hydrogen exchanger), member 1             | -1.26 | 0.009 |
| 95609_at    | 1426798_a_at | ---           | ---                                                                        | -1.26 | 0.000 |
| 96949_at    | 1415767_at   | Ythdf1        | YTH domain family 1                                                        | -1.26 | 0.000 |
| 98144_f_at  | 1430029_a_at | Sas           | sarcoma amplified sequence                                                 | -1.26 | 0.001 |
| 100099_at   | 1448621_a_at | Smpd1         | sphingomyelin phosphodiesterase 1, acid lysosomal                          | -1.27 | 0.001 |
| 102291_at   | 1427393_at   | F9            | coagulation factor IX                                                      | -1.27 | 0.000 |
| 102555_at   | 1422417_at   | X99300        | epidymal sperm gene                                                        | -1.27 | 0.005 |
| 103044_g_at | 1455710_x_at | Mtcp1         | mature T-cell proliferation 1                                              | -1.27 | 0.005 |
| 103220_at   | 1422554_at   | Ndn12         | necdin-like 2                                                              | -1.27 | 0.001 |
| 103243_at   | 1425272_at   | Emp2          | epithelial membrane protein 2                                              | -1.27 | 0.002 |
| 103752_r_at | 1455156_at   | Strn          | striatin, calmodulin binding protein                                       | -1.27 | 0.002 |
| 160262_at   | 1438843_x_at | Mtch2         | mitochondrial carrier homolog 2 (C. elegans)                               | -1.27 | 0.000 |
| 92975_at    | 1448328_at   | Sh3bp2        | SH3-domain binding protein 2                                               | -1.27 | 0.000 |
| 93009_at    | 1416411_at   | Gstm2         | glutathione S-transferase, mu 2                                            | -1.27 | 0.003 |
| 93127_at    | 1426658_x_at | Phgdh         | 3-phosphoglycerate dehydrogenase                                           | -1.27 | 0.001 |
| 93664_at    | 1422009_at   | Atp1b2        | ATPase, Na <sup>+</sup> /K <sup>+</sup> transporting, beta 2 polypeptide   | -1.27 | 0.000 |
| 94820_r_at  | 1448334_a_at | Ccni          | cyclin I                                                                   | -1.27 | 0.000 |
| 94977_at    | 1460203_at   | Itpr1         | inositol 1,4,5-triphosphate receptor 1                                     | -1.27 | 0.004 |
| 95906_at    | 1459927_at   | 4833445I07Rik | RIKEN cDNA 4833445I07 gene                                                 | -1.27 | 0.008 |
| 95994_at    | 1447965_at   | C80012        | expressed sequence C80012                                                  | -1.27 | 0.003 |
| 96676_at    | 1454640_at   | Chchd7        | coiled-coil-helix-coiled-coil-helix domain containing 7                    | -1.27 | 0.006 |
| 97250_at    | 1423211_at   | Nola3         | nucleolar protein family A, member 3                                       | -1.27 | 0.002 |
| 103476_at   | 1454796_at   | D5Ert40e      | DNA segment, Chr 5, ERATO Doi 40, expressed                                | -1.28 | 0.004 |
| 160258_at   | 1416765_s_at | MGI:1913699   | mitochondria-associated protein involved in granulocyte-macrophage c       | -1.28 | 0.003 |
| 160717_at   | 1416841_at   | 1110059E24Rik | RIKEN cDNA 1110059E24 gene                                                 | -1.28 | 0.000 |
| 92637_at    | 1450269_a_at | Pfk1          | phosphofructokinase, liver, B-type                                         | -1.28 | 0.005 |
| 93046_at    | 1428328_at   | Nup50         | nucleoporin 50                                                             | -1.28 | 0.005 |
| 93204_r_at  | 1454831_at   | 3230402J05Rik | RIKEN cDNA 3230402J05 gene                                                 | -1.28 | 0.006 |
| 94956_at    | 1452434_s_at | Dgcr6         | DiGeorge syndrome critical region gene 6                                   | -1.28 | 0.006 |
| 96875_r_at  | 1420174_s_at | Tax1bp1       | Tax1 (human T-cell leukemia virus type I) binding protein 1                | -1.28 | 0.003 |
| 97740_at    | 1418401_a_at | Dusp16        | dual specificity phosphatase 16                                            | -1.28 | 0.001 |

|             |              |               |                                                                       |       |       |
|-------------|--------------|---------------|-----------------------------------------------------------------------|-------|-------|
| 99647_at    | 1416705_at   | Rpe           | ribulose-5-phosphate-3-epimerase                                      | -1.28 | 0.005 |
| 100596_at   | 1450699_at   | Selenbp1      | selenium binding protein 1                                            | -1.29 | 0.001 |
| 102863_at   | 1418801_at   | Zkscan1       | zinc finger with KRAB and SCAN domains 1                              | -1.29 | 0.003 |
| 103227_at   | 1427961_s_at | A1788959      | expressed sequence A1788959                                           | -1.29 | 0.006 |
| 103974_at   | 1419154_at   | Tmprss2       | transmembrane protease, serine 2                                      | -1.29 | 0.001 |
| 104288_at   | 1451971_at   | Cul4a         | cullin 4A                                                             | -1.29 | 0.009 |
| 160275_at   | 1418888_a_at | Sepx1         | selenoprotein X 1                                                     | -1.29 | 0.001 |
| 94928_at    | 1418099_at   | Tnfrsf1b      | tumor necrosis factor receptor superfamily, member 1b                 | -1.29 | 0.006 |
| 95914_at    | 1456405_at   | 6720461J16Rik | RIKEN cDNA 6720461J16 gene                                            | -1.29 | 0.007 |
| 97331_at    | 1416265_at   | Capn10        | calpain 10                                                            | -1.29 | 0.003 |
| 97479_at    | 1417908_s_at | Ube2l3        | ubiquitin-conjugating enzyme E2L 3                                    | -1.29 | 0.000 |
| 97767_at    | 1420728_at   | Krt1-2        | keratin complex 1, acidic, gene 2                                     | -1.29 | 0.004 |
| 98277_at    | 1460664_at   | Zfpn1a4       | zinc finger protein, subfamily 1A, 4 (Eos)                            | -1.29 | 0.004 |
| 99320_at    | 1421735_a_at | St8sia5       | ST8 alpha-N-acetylneuraminide alpha-2,8-sialyltransferase 5           | -1.29 | 0.006 |
| 99357_at    | 1447956_at   | C76614        | expressed sequence C76614                                             | -1.29 | 0.004 |
| 100043_f_at | 1429457_at   | 2310020A21Rik | RIKEN cDNA 2310020A21 gene                                            | -1.3  | 0.001 |
| 100965_at   | 1455167_at   | Cox8c         | cytochrome c oxidase, subunit VIIIc                                   | -1.3  | 0.004 |
| 100977_at   | 1423748_at   | Pdk1          | pyruvate dehydrogenase kinase, isoenzyme 1                            | -1.3  | 0.003 |
| 101366_f_at | 1453018_at   | Nvl           | nuclear VCP-like                                                      | -1.3  | 0.004 |
| 102072_g_at | 1434281_at   | 1500034J01Rik | RIKEN cDNA 1500034J01 gene                                            | -1.3  | 0.001 |
| 103260_at   | 1430291_at   | 1110060D06Rik | RIKEN cDNA 1110060D06 gene                                            | -1.3  | 0.004 |
| 94012_at    | 1417499_at   | Timm13a       | translocase of inner mitochondrial membrane 13 homolog a (yeast)      | -1.3  | 0.010 |
| 94174_at    | 1420929_at   | Catnal1       | catenin alpha-like 1                                                  | -1.3  | 0.002 |
| 94212_at    | 1425557_x_at | Tsc22d3       | TSC22 domain family 3                                                 | -1.3  | 0.002 |
| 95453_f_at  | 1419814_s_at | S100a1        | S100 calcium binding protein A1                                       | -1.3  | 0.008 |
| 96627_at    | 1416667_at   | Ebp           | phenylalkylamine Ca2+ antagonist (emopamil) binding protein           | -1.3  | 0.006 |
| 96734_at    | 1417834_at   | Synj2bp       | synaptojanin 2 binding protein                                        | -1.3  | 0.001 |
| 97868_at    | 1449935_a_at | Dnaj3         | Dnaj (Hsp40) homolog, subfamily A, member 3                           | -1.3  | 0.000 |
| 98461_at    | 1417108_at   | 1200014P03Rik | RIKEN cDNA 1200014P03 gene                                            | -1.3  | 0.001 |
| 99013_f_at  | 1423088_at   | LOC434449     | similar to Ubiquitous tropomodulin (U-Tmod) (Tropomodulin 3)          | -1.3  | 0.006 |
| 101166_at   | 1450514_at   | Zfp29         | zinc finger protein 29                                                | -1.31 | 0.005 |
| 102427_at   | 1451324_s_at | Fyttd1        | forty-two-three domain containing 1                                   | -1.31 | 0.002 |
| 104176_at   | 1452633_s_at | Aak1          | AP2 associated kinase 1                                               | -1.31 | 0.003 |
| 104726_at   | 1451625_a_at | 1700013L23Rik | RIKEN cDNA 1700013L23 gene                                            | -1.31 | 0.003 |
| 93827_at    | 1449337_at   | Tdo2          | tryptophan 2,3-dioxygenase                                            | -1.31 | 0.001 |
| 94489_at    | 1438657_x_at | Ptp4a1        | protein tyrosine phosphatase 4a1                                      | -1.31 | 0.001 |
| 95594_at    | 1449697_s_at | Mfn1          | mitofusin 1                                                           | -1.31 | 0.000 |
| 97430_at    | 1417042_at   | Slc37a4       | solute carrier family 37 (glycerol-6-phosphate transporter), member 4 | -1.31 | 0.002 |
| 99326_at    | 1420584_at   | Pla2g2c       | phospholipase A2, group IIC                                           | -1.31 | 0.000 |
| 102783_at   | 1452799_at   | 2310009E04Rik | RIKEN cDNA 2310009E04 gene                                            | -1.32 | 0.004 |
| 103450_at   | 1428454_at   | Bcas3         | breast carcinoma amplified sequence 3                                 | -1.32 | 0.003 |
| 104161_at   | 1420936_s_at | Cpsf2         | cleavage and polyadenylation specific factor 2                        | -1.32 | 0.008 |
| 160139_at   | 1417013_at   | Hspb8         | heat shock 27kDa protein 8                                            | -1.32 | 0.008 |
| 160220_at   | 1450998_at   | Zfp110        | zinc finger protein 110                                               | -1.32 | 0.008 |
| 160990_r_at | 1424243_at   | BC016198      | cDNA sequence BC016198                                                | -1.32 | 0.009 |
| 93495_at    | 1435731_x_at | Stag1         | Stromal antigen 1                                                     | -1.32 | 0.004 |
| 93975_at    | 1416129_at   | 1300002F13Rik | RIKEN cDNA 1300002F13 gene                                            | -1.32 | 0.006 |
| 94361_at    | 1448270_at   | Ddx21         | DEAD (Asp-Glu-Ala-Asp) box polypeptide 21                             | -1.32 | 0.000 |
| 94522_at    | 1416247_at   | Dctn3         | dynactin 3                                                            | -1.32 | 0.005 |
| 97541_f_at  | 1427651_x_at | H2-D1         | histocompatibility 2, D region locus 1                                | -1.32 | 0.002 |
| 98132_at    | 1422484_at   | Cycs          | cytochrome c, somatic                                                 | -1.32 | 0.001 |
| 99629_at    | 1416555_at   | ---           | ---                                                                   | -1.32 | 0.004 |
| 102357_at   | 1454977_at   | AU020772      | expressed sequence AU020772                                           | -1.33 | 0.001 |

|             |              |               |                                                                |       |       |
|-------------|--------------|---------------|----------------------------------------------------------------|-------|-------|
| 104138_at   | 1448489_at   | Pafah2        | platelet-activating factor acetylhydrolase 2                   | -1.33 | 0.000 |
| 160666_at   | 1428502_at   | Actr6         | ARP6 actin-related protein 6 homolog (yeast)                   | -1.33 | 0.003 |
| 92826_at    | 1427173_a_at | Mrps33        | mitochondrial ribosomal protein S33                            | -1.33 | 0.000 |
| 93779_at    | 1456635_at   | ---           | ---                                                            | -1.33 | 0.003 |
| 94343_at    | 1433887_at   | Dnajc3        | DnaJ (Hsp40) homolog, subfamily C, member 3                    | -1.33 | 0.000 |
| 95156_g_at  | 1424384_a_at | Znrf1         | zinc and ring finger 1                                         | -1.33 | 0.010 |
| 95486_at    | 1420056_s_at | Ptdsr         | phosphatidylserine receptor                                    | -1.33 | 0.003 |
| 96782_at    | 1427290_at   | Krt2-19       | keratin complex 2, basic, gene 19                              | -1.33 | 0.001 |
| 97302_at    | 1450084_s_at | lvns1abp      | influenza virus NS1A binding protein                           | -1.33 | 0.000 |
| 99037_at    | 1421416_at   | Map2k7        | mitogen activated protein kinase kinase 7                      | -1.33 | 0.004 |
| 99441_at    | 1426462_at   | Gphn          | gephyrin                                                       | -1.33 | 0.000 |
| 100713_at   | 1449546_a_at | Zfp617        | zinc finger protein 617                                        | -1.34 | 0.000 |
| 100715_at   | 1421687_at   | Msemb         | beta-microseminoprotein                                        | -1.34 | 0.001 |
| 101088_f_at | 1437850_a_at | Cnbp1         | cellular nucleic acid binding protein 1                        | -1.34 | 0.001 |
| 102194_at   | 1427085_at   | 2810432D09Rik | RIKEN cDNA 2810432D09 gene                                     | -1.34 | 0.000 |
| 103251_at   | 1455073_at   | Cdadc1        | cytidine and dCMP deaminase domain containing 1                | -1.34 | 0.000 |
| 104021_at   | 1420414_at   | Hoxa11        | homeo box A11                                                  | -1.34 | 0.002 |
| 104033_at   | 1426445_at   | Mgea6         | meningioma expressed antigen 6 (coiled-coil proline-rich)      | -1.34 | 0.000 |
| 160947_at   | 1451282_at   | Centd3        | centaurin, delta 3                                             | -1.34 | 0.001 |
| 92490_at    | 1420395_a_at | Kif9          | kinesin family member 9                                        | -1.34 | 0.007 |
| 94225_at    | 1415684_at   | Apg5l         | autophagy 5-like (S. cerevisiae)                               | -1.34 | 0.005 |
| 96563_at    | 1448014_s_at | Usp24         | ubiquitin specific protease 24                                 | -1.34 | 0.003 |
| 98797_at    | 1422915_at   | Gast          | gastrin                                                        | -1.34 | 0.010 |
| 102819_at   | 1418046_at   | Nap112        | nucleosome assembly protein 1-like 2                           | -1.35 | 0.002 |
| 102852_at   | 1418815_at   | Cdh2          | cadherin 2                                                     | -1.35 | 0.002 |
| 103527_at   | 1436693_x_at | Slc35e4       | solute carrier family 35, member E4                            | -1.35 | 0.001 |
| 160499_at   | 1415889_a_at | Tra1          | tumor rejection antigen gp96                                   | -1.35 | 0.000 |
| 92429_at    | 1422926_at   | Mc2r          | melanocortin 2 receptor                                        | -1.35 | 0.005 |
| 94414_at    | 1436615_a_at | Otc           | ornithine transcarbamylase                                     | -1.35 | 0.001 |
| 95043_at    | 1424273_at   | Cyp2c70       | cytochrome P450, family 2, subfamily c, polypeptide 70         | -1.35 | 0.000 |
| 95449_at    | 1451523_a_at | 2310075G12Rik | RIKEN cDNA 2310075G12 gene                                     | -1.35 | 0.000 |
| 96264_at    | 1416281_at   | Wdr45l        | Wdr45 like                                                     | -1.35 | 0.007 |
| 96644_at    | 1450742_at   | Bysl          | bystin-like                                                    | -1.35 | 0.000 |
| 99585_at    | 1449611_at   | Kai1          | kangai 1 (suppression of tumorigenicity 6, prostate)           | -1.35 | 0.005 |
| 104036_at   | 1436479_a_at | Dpp7          | dipeptidylpeptidase 7                                          | -1.36 | 0.007 |
| 104259_at   | 1450416_at   | Cbx5          | chromobox homolog 5 (Drosophila HP1a)                          | -1.36 | 0.005 |
| 160624_at   | 1426796_at   | Txln          | Taxilin                                                        | -1.36 | 0.002 |
| 93195_at    | 1429005_at   | Mfhas1        | malignant fibrous histiocytoma amplified sequence 1            | -1.36 | 0.004 |
| 93560_at    | 1450095_a_at | Acyp1         | acylphosphatase 1, erythrocyte (common) type                   | -1.36 | 0.001 |
| 94036_at    | 1416511_a_at | Cdc42ep4      | CDC42 effector protein (Rho GTPase binding) 4                  | -1.36 | 0.003 |
| 95395_at    | 1426840_at   | Ythdf3        | YTH domain family 3                                            | -1.36 | 0.000 |
| 95522_i_at  | 1448760_at   | Zfp68         | zinc finger protein 68                                         | -1.36 | 0.001 |
| 95949_at    | 1442492_at   | DXErt11e      | DNA segment, Chr X, ERATO Doi 11, expressed                    | -1.36 | 0.004 |
| 96760_at    | 1449886_a_at | Timm10        | translocase of inner mitochondrial membrane 10 homolog (yeast) | -1.36 | 0.000 |
| 96781_at    | 1415725_at   | Rrn3          | RRN3 RNA polymerase I transcription factor homolog (yeast)     | -1.36 | 0.009 |
| 101318_at   | 1450527_at   | Sstr1         | somatostatin receptor 1                                        | -1.37 | 0.005 |
| 104032_at   | 1435666_at   | Mast3         | microtubule associated serine/threonine kinase 3               | -1.37 | 0.003 |
| 160248_at   | 1433482_a_at | Fubp1         | far upstream element (FUSE) binding protein 1                  | -1.37 | 0.003 |
| 160449_at   | 1416018_at   | Dr1           | down-regulator of transcription 1                              | -1.37 | 0.001 |
| 93316_at    | 1460192_at   | Osbpl1a       | oxysterol binding protein-like 1A                              | -1.37 | 0.001 |
| 95596_at    | 1428353_at   | 1110054H05Rik | RIKEN cDNA 1110054H05 gene                                     | -1.37 | 0.002 |
| 95889_at    | 1434787_at   | AI854770      | expressed sequence AI854770                                    | -1.37 | 0.006 |
| 95954_at    | 1444292_at   | D7Ert143e     | DNA segment, Chr 7, ERATO Doi 143, expressed                   | -1.37 | 0.007 |



|             |              |                              |                                                                                                   |       |       |
|-------------|--------------|------------------------------|---------------------------------------------------------------------------------------------------|-------|-------|
| 96841_at    | 1451069_at   | Pim3                         | proviral integration site 3                                                                       | -1.37 | 0.008 |
| 97261_at    | 1460179_at   | Dnaj1                        | DnaJ (Hsp40) homolog, subfamily A, member 1                                                       | -1.37 | 0.002 |
| 102385_at   | 1428389_s_at | Wdr43                        | WD repeat domain 43                                                                               | -1.38 | 0.001 |
| 102816_at   | 1421921_at   | Serpina3m                    | serine (or cysteine) proteinase inhibitor, clade A, member 3M                                     | -1.38 | 0.000 |
| 103602_at   | 1420709_s_at | Dao1                         | D-amino acid oxidase 1                                                                            | -1.38 | 0.001 |
| 103723_at   | 1454783_at   | Il13ra1                      | interleukin 13 receptor, alpha 1                                                                  | -1.38 | 0.000 |
| 160403_at   | 1423225_at   | MGI:1931466                  | selenoprotein K                                                                                   | -1.38 | 0.000 |
| 92282_at    | 1427887_at   | 2610304G08Rik                | RIKEN cDNA 2610304G08 gene                                                                        | -1.38 | 0.000 |
| 92708_at    | 1424590_at   | Ddx19b                       | DEAD (Asp-Glu-Ala-Asp) box polypeptide 19b                                                        | -1.38 | 0.000 |
| 93429_at    | 1449016_at   | Zp2                          | zona pellucida glycoprotein 2                                                                     | -1.38 | 0.000 |
| 94875_at    | 1416093_a_at | Mrpl20                       | mitochondrial ribosomal protein L20                                                               | -1.38 | 0.003 |
| 95783_g_at  | 1422345_s_at | Mageb1 /// Mageb2 /// Mageb3 | melanoma antigen, family B, 1 /// melanoma antigen, family B, 2 /// melanoma antigen, family B, 3 | -1.38 | 0.005 |
| 96598_at    | 1455653_at   | Ccnj                         | cyclin J                                                                                          | -1.38 | 0.000 |
| 97004_at    | 1422373_at   | Olf71                        | olfactory receptor 71                                                                             | -1.38 | 0.006 |
| 99855_at    | 1421340_at   | Map3k5                       | mitogen activated protein kinase kinase kinase 5                                                  | -1.38 | 0.009 |
| 100014_at   | 1416944_a_at | Tlk2                         | tousled-like kinase 2 (Arabidopsis)                                                               | -1.39 | 0.005 |
| 100015_at   | 1449090_a_at | Yes1                         | Yamaguchi sarcoma viral (v-yes) oncogene homolog 1                                                | -1.39 | 0.001 |
| 100738_at   | 1426149_at   | Spi15                        | serine protease inhibitor 15                                                                      | -1.39 | 0.007 |
| 101853_f_at | 1450876_at   | Cfh                          | complement component factor h                                                                     | -1.39 | 0.003 |
| 102766_at   | 1427940_s_at | Mycbp                        | c-myc binding protein                                                                             | -1.39 | 0.003 |
| 103964_at   | 1460652_at   | Esrra                        | Estrogen related receptor, alpha                                                                  | -1.39 | 0.001 |
| 104215_at   | 1435444_at   | Atf6                         | activating transcription factor 6                                                                 | -1.39 | 0.001 |
| 160284_at   | 1418068_at   | Ndufa10                      | NADH dehydrogenase (ubiquinone) 1 alpha subcomplex 10                                             | -1.39 | 0.005 |
| 160475_at   | 1450418_a_at | 2310034L04Rik                | RIKEN cDNA 2310034L04 gene                                                                        | -1.39 | 0.001 |
| 161034_at   | 1451502_at   | Pla2g10                      | phospholipase A2, group X                                                                         | -1.39 | 0.002 |
| 93165_at    | 1460438_at   | 2610022K04Rik                | RIKEN cDNA 2610022K04 gene                                                                        | -1.39 | 0.007 |
| 93485_at    | 1435537_at   | Ptprd                        | Protein tyrosine phosphatase, receptor type, D                                                    | -1.39 | 0.002 |
| 93663_r_at  | 1439749_at   | Zap70                        | zeta-chain (TCR) associated protein kinase                                                        | -1.39 | 0.000 |
| 94146_at    | 1421578_at   | Ccl4                         | chemokine (C-C motif) ligand 4                                                                    | -1.39 | 0.000 |
| 95054_at    | 1460323_at   | Tars                         | threonyl-tRNA synthetase                                                                          | -1.39 | 0.001 |
| 98459_at    | 1425179_at   | Shmt1                        | serine hydroxymethyl transferase 1 (soluble)                                                      | -1.39 | 0.002 |
| 102166_g_at | 1422380_at   | V1rb5                        | vomeroneasal 1 receptor, B5                                                                       | -1.4  | 0.007 |
| 102969_at   | 1430417_s_at | 0610025P10Rik                | RIKEN cDNA 0610025P10 gene                                                                        | -1.4  | 0.002 |
| 103313_r_at | 1434941_s_at | 2610101J03Rik                | RIKEN cDNA 2610101J03 gene                                                                        | -1.4  | 0.000 |
| 160256_at   | 1434732_x_at | Tomm7                        | Translocase of outer mitochondrial membrane 7 homolog (yeast)                                     | -1.4  | 0.003 |
| 160998_at   | 1449677_s_at | Tmem38b                      | transmembrane protein 38B                                                                         | -1.4  | 0.000 |
| 162058_f_at | 1418767_at   | Cyp4f13                      | cytochrome P450, family 4, subfamily f, polypeptide 13                                            | -1.4  | 0.001 |
| 93269_at    | 1451240_a_at | Glo1                         | glyoxalase 1                                                                                      | -1.4  | 0.005 |
| 96423_at    | 1420555_at   | Alx3                         | aristales 3                                                                                       | -1.4  | 0.008 |
| 98073_at    | 1451435_at   | Cutl1                        | cut-like 1 (Drosophila)                                                                           | -1.4  | 0.000 |
| 99847_at    | 1418946_at   | St3gal1                      | ST3 beta-galactoside alpha-2,3-sialyltransferase 1                                                | -1.4  | 0.002 |
| 103249_at   | 1417304_at   | Chrd                         | chordin                                                                                           | -1.41 | 0.002 |
| 94556_at    | 1431055_a_at | Snx10                        | sorting nexin 10                                                                                  | -1.41 | 0.001 |
| 95082_at    | 1423062_at   | Igfbp3                       | insulin-like growth factor binding protein 3                                                      | -1.41 | 0.001 |
| 95694_at    | 1423474_at   | Top1                         | topoisomerase (DNA) I                                                                             | -1.41 | 0.000 |
| 95714_at    | 1436681_x_at | 0610009D07Rik                | RIKEN cDNA 0610009D07 gene                                                                        | -1.41 | 0.000 |
| 95791_s_at  | 1427816_at   | Sfrs2                        | splicing factor, arginine/serine-rich 2 (SC-35)                                                   | -1.41 | 0.004 |
| 99898_at    | 1417944_at   | Gng4                         | guanine nucleotide binding protein (G protein), gamma 4 subunit                                   | -1.41 | 0.001 |
| 101649_at   | 1421833_at   | Pip5k1a                      | phosphatidylinositol-4-phosphate 5-kinase, type 1 alpha                                           | -1.42 | 0.006 |
| 102574_at   | 1421793_at   | Fgf11                        | fibroblast growth factor 11                                                                       | -1.42 | 0.004 |
| 104179_at   | 1434312_at   | Al788669                     | expressed sequence Al788669                                                                       | -1.42 | 0.000 |
| 104298_at   | 1424915_s_at | ---                          | ---                                                                                               | -1.42 | 0.001 |
| 160710_at   | 1426709_a_at | Usp33                        | ubiquitin specific protease 33                                                                    | -1.42 | 0.001 |

|             |              |               |                                                                         |       |       |
|-------------|--------------|---------------|-------------------------------------------------------------------------|-------|-------|
| 92261_at    | 1435231_at   | Coq4          | coenzyme Q4 homolog (yeast)                                             | -1.42 | 0.000 |
| 94268_f_at  | 1416848_at   | Ubl5          | ubiquitin-like 5                                                        | -1.42 | 0.001 |
| 95733_at    | 1451782_a_at | Slc29a1       | solute carrier family 29 (nucleoside transporters), member 1            | -1.42 | 0.003 |
| 96794_at    | 1425030_at   | Zfp622        | zinc finger protein 622                                                 | -1.42 | 0.002 |
| 97317_at    | 1448136_at   | Enpp2         | ectonucleotide pyrophosphatase/phosphodiesterase 2                      | -1.42 | 0.010 |
| 98048_at    | 1423982_at   | Fusip1        | FUS interacting protein (serine-arginine rich) 1                        | -1.42 | 0.001 |
| 101527_at   | 1419258_at   | Tcea1         | transcription elongation factor A (SII) 1                               | -1.43 | 0.000 |
| 102776_at   | 1428592_s_at | Usp38         | ubiquitin specific protease 38                                          | -1.43 | 0.002 |
| 160518_at   | 1460706_s_at | Rer1          | RER1 retention in endoplasmic reticulum 1 homolog (S. cerevisiae)       | -1.43 | 0.004 |
| 98316_at    | 1427573_at   | Chic1         | cysteine-rich hydrophobic domain 1                                      | -1.43 | 0.009 |
| 98447_at    | 1418982_at   | Cebpa         | CCAAT/enhancer binding protein (C/EBP), alpha                           | -1.43 | 0.002 |
| 99452_at    | 1451255_at   | MGI:1927471   | liver-specific bHLH-Zip transcription factor                            | -1.43 | 0.001 |
| 102725_at   | 1448468_a_at | Kcnab1        | potassium voltage-gated channel, shaker-related subfamily, beta memt    | -1.44 | 0.003 |
| 104406_at   | 1449450_at   | Ptges         | prostaglandin E synthase                                                | -1.44 | 0.005 |
| 160740_at   | 1454921_at   | Gm561         | gene model 561, (NCBI)                                                  | -1.44 | 0.002 |
| 92919_at    | 1418268_at   | Htr3a         | 5-hydroxytryptamine (serotonin) receptor 3A                             | -1.44 | 0.005 |
| 93528_s_at  | 1428289_at   | Bteb1         | basic transcription element binding protein 1                           | -1.44 | 0.009 |
| 94459_at    | 1455152_at   | AI462493      | Expressed sequence AI462493                                             | -1.44 | 0.001 |
| 95926_at    | 1419778_at   | ---           | ---                                                                     | -1.44 | 0.006 |
| 96984_at    | 1422384_at   | Olf1509       | olfactory receptor 1509                                                 | -1.44 | 0.009 |
| 98794_at    | 1449287_at   | Srms          | src-related kinase lacking C-terminal regulatory tyrosine and N-termina | -1.44 | 0.000 |
| 101642_at   | 1427841_at   | ---           | ---                                                                     | -1.45 | 0.000 |
| 160783_at   | 1426780_at   | D14Ert436e    | DNA segment, Chr 14, ERATO Doi 436, expressed                           | -1.45 | 0.001 |
| 95066_at    | 1425129_a_at | Taldo1        | transaldolase 1                                                         | -1.45 | 0.001 |
| 95142_s_at  | 1424168_a_at | ---           | ---                                                                     | -1.45 | 0.001 |
| 96229_at    | 1421946_at   | Crp           | C-reactive protein, petaxin related                                     | -1.45 | 0.000 |
| 96487_at    | 1442976_at   | C81072        | expressed sequence C81072                                               | -1.45 | 0.010 |
| 96803_at    | 1420654_a_at | Gbe1          | glucan (1,4-alpha-), branching enzyme 1                                 | -1.45 | 0.002 |
| 102799_at   | 1418037_at   | C4bp          | complement component 4 binding protein                                  | -1.46 | 0.005 |
| 161947_f_at | 1426039_a_at | Alox12e       | arachidonate lipoxigenase, epidermal                                    | -1.46 | 0.001 |
| 93117_at    | 1420365_a_at | Hnrpa2b1      | heterogeneous nuclear ribonucleoprotein A2/B1                           | -1.46 | 0.003 |
| 94395_at    | 1433640_at   | ---           | ---                                                                     | -1.46 | 0.005 |
| 98380_at    | 1418414_at   | Kcnh1         | potassium voltage-gated channel, subfamily H (eag-related), member 1    | -1.46 | 0.001 |
| 98726_at    | 1421444_at   | Pgr           | progesterone receptor                                                   | -1.46 | 0.005 |
| 101150_at   | 1421773_at   | Etsrp71       | ets related protein 71                                                  | -1.47 | 0.009 |
| 101416_f_at | 1423163_at   | Bat4          | HLA-B associated transcript 4                                           | -1.47 | 0.002 |
| 102707_f_at | 1421564_at   | Serpina3c     | serine (or cysteine) proteinase inhibitor, clade A, member 3C           | -1.47 | 0.008 |
| 103516_at   | 1418925_at   | Celsr1        | cadherin EGF LAG seven-pass G-type receptor 1                           | -1.47 | 0.001 |
| 104704_at   | 1415986_at   | Clcn4-2       | chloride channel 4-2                                                    | -1.47 | 0.002 |
| 92469_at    | 1451031_at   | Sfrp4         | secreted frizzled-related sequence protein 4                            | -1.47 | 0.001 |
| 92802_s_at  | 1425467_a_at | Plp1          | proteolipid protein (myelin) 1                                          | -1.47 | 0.006 |
| 98423_at    | 1423271_at   | Gjb2          | gap junction membrane channel protein beta 2                            | -1.47 | 0.000 |
| 99851_at    | 1436308_at   | Zfp292        | zinc finger protein 292                                                 | -1.47 | 0.000 |
| 160417_at   | 1418429_at   | Kif5b         | kinesin family member 5B                                                | -1.48 | 0.000 |
| 93623_at    | 1448665_at   | Dmd           | dystrophin, muscular dystrophy                                          | -1.48 | 0.001 |
| 93692_f_at  | 1449417_at   | Ambn          | ameloblastin                                                            | -1.48 | 0.005 |
| 96924_at    | 1452189_at   | 9430077D24Rik | RIKEN cDNA 9430077D24 gene                                              | -1.48 | 0.000 |
| 97526_at    | 1448308_at   | Ap3m1         | adaptor-related protein complex 3, mu 1 subunit                         | -1.48 | 0.000 |
| 99827_at    | 1429999_at   | 4933403M19Rik | RIKEN cDNA 4933403M19 gene                                              | -1.48 | 0.007 |
| 101094_at   | 1416480_a_at | MGI:1930666   | hypoxia induced gene 1                                                  | -1.49 | 0.003 |
| 104137_at   | 1449302_at   | Abca2         | ATP-binding cassette, sub-family A (ABC1), member 2                     | -1.49 | 0.000 |
| 96783_at    | 1426014_a_at | Mucdhl        | mucin and cadherin like                                                 | -1.49 | 0.000 |
| 99180_at    | 1450873_at   | Gtpbp4        | GTP binding protein 4                                                   | -1.49 | 0.003 |

|             |              |               |                                                                        |       |       |
|-------------|--------------|---------------|------------------------------------------------------------------------|-------|-------|
| 160392_at   | 1433448_at   | B430110G05Rik | RIKEN cDNA B430110G05 gene                                             | -1.5  | 0.000 |
| 104349_at   | 1428133_at   | MGI:2156003   | Smad nuclear interacting protein 1                                     | -1.51 | 0.004 |
| 93290_at    | 1453299_a_at | Pnp           | purine-nucleoside phosphorylase                                        | -1.51 | 0.000 |
| 93978_at    | 1454842_a_at | B3galnt2      | UDP-GalNAc:betaGlcNAc beta 1,3-galactosaminyltransferase, polypep      | -1.51 | 0.002 |
| 95417_at    | 1426350_at   | Mgat2         | mannoside acetylglucosaminyltransferase 2                              | -1.51 | 0.000 |
| 101453_at   | 1419608_a_at | Mia1          | melanoma inhibitory activity 1                                         | -1.52 | 0.002 |
| 103612_at   | 1418903_at   | Aqp2          | aquaporin 2                                                            | -1.52 | 0.008 |
| 160850_at   | 1460673_at   | Fpgs          | folypolyglutamyl synthetase                                            | -1.52 | 0.000 |
| 95300_at    | 1449924_at   | Prg3          | proteoglycan 3                                                         | -1.52 | 0.005 |
| 97191_at    | 1449599_at   | ---           | ---                                                                    | -1.52 | 0.001 |
| 98994_at    | 1416854_at   | Slc34a2       | solute carrier family 34 (sodium phosphate), member 2                  | -1.52 | 0.001 |
| 160376_at   | 1452646_at   | Trp53inp2     | tumor protein p53 inducible nuclear protein 2                          | -1.53 | 0.000 |
| 160582_at   | 1418551_at   | Mybpc3        | myosin binding protein C, cardiac                                      | -1.53 | 0.001 |
| 92648_at    | 1435058_x_at | Stxbp3        | syntaxin binding protein 3                                             | -1.53 | 0.005 |
| 97420_at    | 1417290_at   | Lrg1          | leucine-rich alpha-2-glycoprotein 1                                    | -1.53 | 0.000 |
| 104369_at   | 1422784_at   | Krt2-6a       | keratin complex 2, basic, gene 6a                                      | -1.54 | 0.000 |
| 104745_at   | 1416793_at   | Arl6ip2       | ADP-ribosylation factor-like 6 interacting protein 2                   | -1.54 | 0.001 |
| 161077_f_at | 1448400_a_at | Smardc2       | SWI/SNF related, matrix associated, actin dependent regulator of chror | -1.54 | 0.000 |
| 92634_at    | 1441342_at   | Dpp4          | Dipeptidylpeptidase 4                                                  | -1.54 | 0.003 |
| 94775_at    | 1420556_at   | Oxt           | oxytocin                                                               | -1.54 | 0.002 |
| 95870_at    | 1442974_at   | D6Ertd160e    | DNA segment, Chr 6, ERATO Doi 160, expressed                           | -1.54 | 0.006 |
| 97410_at    | 1454712_at   | Mcart1        | mitochondrial carrier triple repeat 1                                  | -1.54 | 0.002 |
| 160617_at   | 1432543_a_at | Klf13         | Kruppel-like factor 13                                                 | -1.55 | 0.002 |
| 95972_at    | 1459891_at   | C78444        | expressed sequence C78444                                              | -1.55 | 0.009 |
| 96535_at    | 1435802_at   | Gm157         | gene model 157, (NCBI)                                                 | -1.55 | 0.009 |
| 101639_r_at | 1421741_at   | Cyp3a16       | cytochrome P450, family 3, subfamily a, polypeptide 16                 | -1.56 | 0.001 |
| 104184_at   | 1450791_at   | Nppb          | natriuretic peptide precursor type B                                   | -1.56 | 0.001 |
| 104206_at   | 1453287_at   | 5730557B15Rik | RIKEN cDNA 5730557B15 gene                                             | -1.56 | 0.001 |
| 104525_at   | 1428351_at   | Ppm1m         | protein phosphatase 1M                                                 | -1.56 | 0.000 |
| 92735_at    | 1450128_at   | Pla2g2a       | phospholipase A2, group IIA (platelets, synovial fluid)                | -1.56 | 0.002 |
| 95057_at    | 1448185_at   | Herpud1       | homocysteine-inducible, endoplasmic reticulum stress-inducible, ubiqiu | -1.56 | 0.000 |
| 98137_at    | 1419525_at   | Car5a         | carbonic anhydrase 5a, mitochondrial                                   | -1.56 | 0.000 |
| 103360_at   | 1417989_at   | Tssk1         | testis-specific serine kinase 1                                        | -1.57 | 0.004 |
| 104199_at   | 1460743_at   | Tigd5         | tigger transposable element derived 5                                  | -1.57 | 0.001 |
| 92728_at    | 1422873_at   | Prg2          | proteoglycan 2, bone marrow                                            | -1.57 | 0.002 |
| 96227_at    | 1448506_at   | Serpina6      | serine (or cysteine) proteinase inhibitor, clade A, member 6           | -1.57 | 0.005 |
| 101597_at   | 1446829_at   | D12Ertd216e   | DNA segment, Chr 12, ERATO Doi 216, expressed                          | -1.58 | 0.009 |
| 101822_at   | 1422237_at   | Mc3r          | melanocortin 3 receptor                                                | -1.58 | 0.004 |
| 93926_at    | 1421382_at   | Prlr          | prolactin receptor                                                     | -1.58 | 0.002 |
| 103369_at   | 1436316_at   | 9430029L20Rik | RIKEN cDNA 9430029L20 gene                                             | -1.59 | 0.000 |
| 161036_at   | 1426712_at   | Slc6a15       | solute carrier family 6 (neurotransmitter transporter), member 15      | -1.59 | 0.009 |
| 101474_at   | 1419578_at   | Mbl1          | mannose binding lectin, liver (A)                                      | -1.6  | 0.001 |
| 93058_at    | 1424343_a_at | Eif1a         | eukaryotic translation initiation factor 1A                            | -1.6  | 0.000 |
| 96000_at    | 1459924_at   | Atp6v0a1      | ATPase, H+ transporting, lysosomal V0 subunit a isoform 1              | -1.6  | 0.002 |
| 97710_f_at  | 1448028_at   | C530046L02Rik | RIKEN cDNA C530046L02 gene                                             | -1.6  | 0.000 |
| 96571_at    | 1449692_at   | Prkc          | protein kinase C, zeta                                                 | -1.61 | 0.002 |
| 93915_at    | 1416957_at   | Pou2af1       | POU domain, class 2, associating factor 1                              | -1.62 | 0.009 |
| 98328_at    | 1421999_at   | Tshr          | thyroid stimulating hormone receptor                                   | -1.62 | 0.006 |
| 100311_f_at | 1421802_at   | Ear1          | eosinophil-associated, ribonuclease A family, member 1                 | -1.63 | 0.010 |
| 104273_at   | 1419002_s_at | Baat          | bile acid-Coenzyme A: amino acid N-acyltransferase                     | -1.63 | 0.001 |
| 95122_g_at  | 1423371_at   | Pole4         | polymerase (DNA-directed), epsilon 4 (p12 subunit)                     | -1.63 | 0.001 |
| 100600_at   | 1448182_a_at | Cd24a         | CD24a antigen                                                          | -1.64 | 0.003 |
| 102841_at   | 1435782_at   | LOC216818     | similar to ubiquitin A-52 residue ribosomal protein fusion product 1   | -1.64 | 0.004 |

|             |              |                   |                                                                        |       |       |
|-------------|--------------|-------------------|------------------------------------------------------------------------|-------|-------|
| 161033_at   | 1449208_at   | Pap0lb            | poly (A) polymerase beta (testis specific)                             | -1.64 | 0.005 |
| 103660_at   | 1449442_at   | Pex11a            | peroxisomal biogenesis factor 11a                                      | -1.65 | 0.001 |
| 92531_at    | 1455698_at   | Tloc1             | translocation protein 1                                                | -1.65 | 0.008 |
| 95343_at    | 1419323_at   | Padi1             | peptidyl arginine deiminase, type I                                    | -1.65 | 0.004 |
| 99062_at    | 1417319_at   | Pvrl3             | poliovirus receptor-related 3                                          | -1.65 | 0.001 |
| 103367_at   | 1418655_at   | Galg1             | UDP-N-acetyl-alpha-D-galactosamine:(N-acetylneuraminy)-galactosylc     | -1.66 | 0.007 |
| 103084_at   | 1460318_at   | Csrp3             | cysteine and glycine-rich protein 3                                    | -1.68 | 0.000 |
| 94297_at    | 1416125_at   | Fkbp5             | FK506 binding protein 5                                                | -1.69 | 0.003 |
| 96985_at    | 1422385_at   | Olf1264           | olfactory receptor 1264                                                | -1.69 | 0.005 |
| 92925_at    | 1418901_at   | ---               | ---                                                                    | -1.7  | 0.000 |
| 93500_at    | 1424126_at   | Alas1             | aminolevulinic acid synthase 1                                         | -1.7  | 0.002 |
| 94627_at    | 1450369_at   | Figla             | factor in the germline alpha                                           | -1.7  | 0.003 |
| 95546_g_at  | 1452014_a_at | Igf1              | insulin-like growth factor 1                                           | -1.7  | 0.005 |
| 96756_at    | 1435333_at   | ---               | ---                                                                    | -1.7  | 0.000 |
| 92583_at    | 1423867_at   | Serpina3k         | serine (or cysteine) proteinase inhibitor, clade A, member 3K          | -1.71 | 0.001 |
| 103636_at   | 1418746_at   | MGI:1930773       | brain protein 17                                                       | -1.72 | 0.006 |
| 92454_at    | 1422899_at   | Slc6a20           | solute carrier family 6 (neurotransmitter transporter), member 20      | -1.72 | 0.008 |
| 94994_at    | 1425633_at   | Cfh               | complement component factor h                                          | -1.72 | 0.001 |
| 102701_at   | 1425645_s_at | Cyp2b10           | cytochrome P450, family 2, subfamily b, polypeptide 10                 | -1.73 | 0.003 |
| 97179_at    | 1460713_at   | BC048355          | CDNA sequence BC048355                                                 | -1.73 | 0.009 |
| 99411_at    | 1422288_at   | Htr1b             | 5-hydroxytryptamine (serotonin) receptor 1B                            | -1.73 | 0.000 |
| 95981_at    | 1441401_at   | C79329            | expressed sequence C79329                                              | -1.74 | 0.003 |
| 97125_f_at  | 1450534_x_at | LOC56628          | MHC (A.CA/J(H-2K-f) class I antigen                                    | -1.75 | 0.000 |
| 101539_f_at | 1435371_x_at | Ces3              | carboxylesterase 3                                                     | -1.76 | 0.006 |
| 101729_at   | 1423019_at   | Gja9              | gap junction membrane channel protein alpha 9                          | -1.78 | 0.009 |
| 103582_r_at | 1452054_at   | 6130401J04Rik     | RIKEN cDNA 6130401J04 gene                                             | -1.81 | 0.002 |
| 93304_at    | 1448741_at   | Slc3a1            | solute carrier family 3, member 1                                      | -1.81 | 0.000 |
| 99672_at    | 1448161_a_at | Clcn4-2           | chloride channel 4-2                                                   | -1.82 | 0.000 |
| 97532_at    | 1451242_a_at | Ppp5c             | protein phosphatase 5, catalytic subunit                               | -1.85 | 0.000 |
| 96269_at    | 1451122_at   | Idi1              | isopentenyl-diphosphate delta isomerase                                | -1.86 | 0.004 |
| 100755_at   | 1422928_at   | ---               | ---                                                                    | -1.88 | 0.001 |
| 104285_at   | 1427229_at   | Hmgcr             | 3-hydroxy-3-methylglutaryl-Coenzyme A reductase                        | -1.88 | 0.000 |
| 98370_at    | 1421781_at   | Upk2              | uroplakin 2                                                            | -1.89 | 0.000 |
| 92401_at    | 1419692_a_at | Ltc4s             | leukotriene C4 synthase                                                | -1.92 | 0.002 |
| 94185_at    | 1421419_at   | Kcnk4             | potassium channel, subfamily K, member 4                               | -1.92 | 0.000 |
| 98596_s_at  | 1449198_a_at | St3gal5           | ST3 beta-galactoside alpha-2,3-sialyltransferase 5                     | -1.92 | 0.001 |
| 98111_at    | 1425993_a_at | Hsp105            | heat shock protein 105                                                 | -1.94 | 0.001 |
| 92820_at    | 1417169_at   | Usp2              | ubiquitin specific protease 2                                          | -1.98 | 0.000 |
| 93914_at    | 1448950_at   | Il1r1             | interleukin 1 receptor, type I                                         | -1.98 | 0.001 |
| 98851_at    | 1421409_at   | Msi1h             | Musashi homolog 1 (Drosophila)                                         | -2.02 | 0.006 |
| 96643_at    | 1424351_at   | Wfdc2             | WAP four-disulfide core domain 2                                       | -2.06 | 0.000 |
| 102204_at   | 1451715_at   | Mafb              | v-maf musculoaponeurotic fibrosarcoma oncogene family, protein B (av   | -2.07 | 0.000 |
| 102998_at   | 1450715_at   | Cyp1a2            | cytochrome P450, family 1, subfamily a, polypeptide 2                  | -2.09 | 0.000 |
| 98892_at    | 1418288_at   | Lpin1             | lipin 1                                                                | -2.11 | 0.005 |
| 104659_g_at | 1425107_a_at | Lifr              | leukemia inhibitory factor receptor                                    | -2.16 | 0.000 |
| 101647_at   | 1421767_at   | ---               | ---                                                                    | -2.17 | 0.000 |
| 104008_at   | 1450220_a_at | Spdef             | SAM pointed domain containing ets transcription factor                 | -2.18 | 0.001 |
| 101181_at   | 1422181_at   | Cnga2             | cyclic nucleotide gated channel alpha 2                                | -2.23 | 0.004 |
| 102847_s_at | 1422230_s_at | Cyp2a4 /// Cyp2a5 | cytochrome P450, family 2, subfamily a, polypeptide 4 /// cytochrome P | -2.27 | 0.004 |
| 93683_at    | 1450680_at   | Rag1              | recombination activating gene 1                                        | -2.29 | 0.003 |
| 100069_at   | 1448792_a_at | Cyp2f2            | cytochrome P450, family 2, subfamily f, polypeptide 2                  | -2.3  | 0.000 |
| 103887_at   | 1448756_at   | S100a9            | S100 calcium binding protein A9 (calgranulin B)                        | -2.3  | 0.000 |
| 97708_at    | 1459933_at   | ---               | ---                                                                    | -2.31 | 0.005 |

|             |              |                           |                                                                             |        |       |
|-------------|--------------|---------------------------|-----------------------------------------------------------------------------|--------|-------|
| 95552_at    | 1417991_at   | Dio1                      | deiodinase, iodothyronine, type I                                           | -2.36  | 0.001 |
| 103599_at   | 1451053_a_at | Mdm1                      | transformed mouse 3T3 cell double minute 1                                  | -2.43  | 0.000 |
| 97690_at    | 1449641_at   | ---                       | ---                                                                         | -2.43  | 0.005 |
| 94715_at    | 1422217_a_at | Cyp1a1                    | cytochrome P450, family 1, subfamily a, polypeptide 1                       | -2.46  | 0.010 |
| 92814_at    | 1417532_at   | Cyp2j5                    | cytochrome P450, family 2, subfamily j, polypeptide 5                       | -2.48  | 0.001 |
| 92837_f_at  | 1417835_at   | Mug1                      | murinoglobulin 1                                                            | -2.49  | 0.000 |
| 104421_at   | 1449525_at   | Fmo3                      | flavin containing monooxygenase 3                                           | -2.53  | 0.000 |
| 103448_at   | 1419394_s_at | S100a8                    | S100 calcium binding protein A8 (calgranulin A)                             | -2.6   | 0.000 |
| 92694_at    | 1425451_s_at | Chi3l3 /// Chi3l4         | chitinase 3-like 3 /// chitinase 3-like 4                                   | -2.61  | 0.000 |
| 101719_at   | 1450606_at   | Pnmt                      | phenylethanolamine-N-methyltransferase                                      | -2.62  | 0.007 |
| 101566_f_at | 1420465_s_at | Mup1 /// Mup2             | major urinary protein 1 /// major urinary protein 2                         | -2.63  | 0.001 |
| 92242_at    | 1419319_at   | Saa4                      | serum amyloid A 4                                                           | -2.68  | 0.000 |
| 101473_at   | 1432517_a_at | Nnmt                      | nicotinamide N-methyltransferase                                            | -2.69  | 0.000 |
| 102015_at   | 1435681_s_at | LOC234374                 | similar to hypothetical protein FLJ10432                                    | -2.78  | 0.000 |
| 97168_at    | 1421456_at   | P2ry1                     | purinergic receptor P2Y, G-protein coupled 1                                | -2.81  | 0.005 |
| 92821_at    | 1417168_a_at | Usp2                      | ubiquitin specific protease 2                                               | -2.84  | 0.000 |
| 101115_at   | 1450009_at   | Ltf                       | lactotransferrin                                                            | -2.88  | 0.000 |
| 100414_s_at | 1415960_at   | Mpo                       | myeloperoxidase                                                             | -2.97  | 0.000 |
| 97680_at    | 1448854_s_at | Mug-ps1 /// Mug1 /// Mug2 | murinoglobulin, pseudogene 1 /// murinoglobulin 1 /// murinoglobulin 2 /    | -2.97  | 0.000 |
| 104747_at   | 1448299_at   | Slc1a1                    | solute carrier family 1 (neuronal/epithelial high affinity glutamate transp | -2.98  | 0.005 |
| 93386_at    | 1418958_at   | Amac1                     | acyl-malonyl condensing enzyme 1                                            | -3.07  | 0.001 |
| 99535_at    | 1425837_a_at | Ccrn4l                    | CCR4 carbon catabolite repression 4-like (S. cerevisiae)                    | -3.19  | 0.000 |
| 101912_at   | 1434484_at   | 1100001G20Rik             | RIKEN cDNA 1100001G20 gene                                                  | -3.22  | 0.000 |
| 92644_s_at  | 1450194_a_at | Myb                       | myeloblastosis oncogene                                                     | -3.26  | 0.000 |
| 96672_at    | 1428662_a_at | MGI:1916782               | homeobox only domain                                                        | -3.29  | 0.000 |
| 100717_at   | 1460667_at   | U90926                    | cDNA sequence U90926                                                        | -3.59  | 0.008 |
| 96153_at    | 1418722_at   | Ngp                       | neutrophilic granule protein                                                | -4.14  | 0.000 |
| 102416_at   | 1417017_at   | Cyp17a1                   | cytochrome P450, family 17, subfamily a, polypeptide 1                      | -4.58  | 0.000 |
| 102651_at   | 1425303_at   | Gck                       | glucokinase                                                                 | -7.45  | 0.000 |
| 92322_at    | 1419691_at   | Camp                      | cathelicidin antimicrobial peptide                                          | -10.12 | 0.000 |
| 160306_at   | 1424737_at   | Thrsp                     | thyroid hormone responsive SPOT14 homolog (Rattus)                          | -11.55 | 0.000 |
