# Supplementary material for: Delayed and Accelerated Aging Share Common Longevity Assurance Mechanisms
Source: PubMed Central journal article supplement (PMC2493043; doi:10.1371/journal.pgen.1000161), 2008-08-15
Supplement: pgen.1000161.s007.pdf [file pgen.1000161.s007.pdf]

**Supplementary table S3. A list of all expression profiles of long-lived mice. FC: fold change, P: p-value**

| Annotation data (from two independent Affymetrix platforms) |              |                  |                                                  | Ghr-/- |      | Ames  |        | CR    |        | Ames-CR |        | Snell |        |
|-------------------------------------------------------------|--------------|------------------|--------------------------------------------------|--------|------|-------|--------|-------|--------|---------|--------|-------|--------|
| 74code                                                      | 430code      | Gene Symbol      | Gene Title                                       | FC     | P    | FC    | P      | FC    | P      | FC      | P      | FC    | P      |
| 100001_at                                                   | 1419178_at   | Cd3g             | CD3 antigen, gamma polypeptide                   | 1.08   | 0.88 | 1.17  | 0.5884 | -1.12 | 0.714  | 1.42    | 0.3342 | 1.24  | 0.356  |
| 100002_at                                                   | 1449123_at   | Itih3            | inter-alpha trypsin inhibitor, heavy chain 3     | -1.17  | 0.27 | 1.12  | 0.3454 | 1.17  | 0.2541 | 1.3     | 0.1102 | 1.12  | 0.5721 |
| 100003_at                                                   | 1427306_at   | Ryr1             | ryanodine receptor 1, skeletal muscle            | 1.27   | 0.36 | -1.83 | 0.2348 | -1.71 | 0.288  | -1.77   | 0.2528 | 2.36  | 0.0251 |
| 100004_at                                                   | 1428531_at   | 5930412E23Rik    | RIKEN cDNA 5930412E23 gene                       | 1.27   | 0.56 | -1.54 | 0.0001 | -1.31 | 0.0123 | -1.62   | 0.0001 | -1.12 | 0.337  |
| 100005_at                                                   | 1460642_at   | Traf4            | Tnf receptor associated factor 4                 | -1.24  | 0.2  | -1.17 | 0.112  | -1    | 0.9845 | -1.21   | 0.0334 | -1.04 | 0.7293 |
| 100007_at                                                   | 1451252_at   | Irf2bp1          | interferon regulatory factor 2 binding protein   | -1.01  | 0.96 | 1.1   | 0.0893 | -1.08 | 0.2386 | -1.03   | 0.5977 | 1.23  | 0.1117 |
| 100009_r_at                                                 | 1416967_at   | Sox2             | SRY-box containing gene 2                        | 3.02   | 0.06 | -1.47 | 0.147  | -1.28 | 0.2911 | -1.33   | 0.2314 | 1.58  | 0.2698 |
| 100010_at                                                   | 1421604_a_at | Klf3             | Kruppel-like factor 3 (basic)                    | 4.46   | 0.07 | 1.06  | 0.3983 | -1.14 | 0.1949 | 1.02    | 0.8764 | 1.38  | 0.4425 |
| 100011_at                                                   | 1429360_at   | Klf3             | Kruppel-like factor 3 (basic)                    | 1.05   | 0.87 | -1.13 | 0.4086 | -1.67 | 0.0012 | -1.45   | 0.0279 | 1.61  | 0.0269 |
| 100012_at                                                   | 1426025_s_at | Laptm5           | lysosomal-associated protein transmembran        | 2.49   | 0.12 | 1.3   | 0.539  | -1.4  | 0.1088 | 1.58    | 0.3913 | 2.32  | 0.1399 |
| 100013_at                                                   | 1424617_at   | Ilf35            | interferon-induced protein 35                    | -1.1   | 0.62 | -1.84 | 0.0087 | -1.23 | 0.0694 | -1.5    | 0.0372 | -2.42 | 0.0157 |
| 100014_at                                                   | 1416944_a_at | Tlk2             | tousled-like kinase 2 (Arabidopsis)              | -1.32  | 0.35 | 1.02  | 0.8719 | 1.16  | 0.1892 | 1.04    | 0.7064 | -1.07 | 0.8055 |
| 100015_at                                                   | 1449090_a_at | Yes1             | Yamaguchi sarcoma viral (v-yes) oncogene         | 1.08   | 0.65 | 1     | 0.9994 | 1.01  | 0.9314 | -1.03   | 0.5584 | 1.59  | 0.034  |
| 100016_at                                                   | 1417234_at   | Mmp11            | matrix metalloproteinase 11                      | 1.71   | 0.01 | -1.34 | 0.0918 | -1.06 | 0.7067 | -1.15   | 0.3138 | -1.02 | 0.9506 |
| 100017_at                                                   | 1419487_at   | Mybph            | myosin binding protein H                         | -1.3   | 0.28 | -1.28 | 0.0568 | -1.19 | 0.1026 | -1.24   | 0.0313 | -1.08 | 0.6238 |
| 100018_at                                                   | 1418333_at   | Mtf1             | metal response element binding transcriptio      | -1.15  | 0.31 | 1.26  | 0.0556 | 1.13  | 0.39   | 1.06    | 0.7321 | 1.74  | 0.0558 |
| 100019_at                                                   | 1427256_at   | Cspg2            | chondroitin sulfate proteoglycan 2               | -2.8   | 0.37 | -1.15 | 0.3047 | 1.3   | 0.5542 | -1.27   | 0.1091 | 1.09  | 0.4982 |
| 100020_at                                                   | 1416637_at   | Slc4a2           | solute carrier family 4 (anion exchanger), me    | -1     | 0.99 | 1.02  | 0.6836 | 1.04  | 0.6444 | -1.02   | 0.6993 | 1.13  | 0.0588 |
| 100021_at                                                   | 1418852_at   | Chrna1           | cholinergic receptor, nicotinic, alpha polypep   | -1.63  | 0.41 | -1.01 | 0.9443 | 1.02  | 0.9351 | 1.28    | 0.3124 | 1.85  | 0.1162 |
| 100022_at                                                   | 1448724_at   | Cish             | cytokine inducible SH2-containing protein        | -2.88  | 0.03 | -2.47 | 0.0001 | -1.37 | 0.023  | -2.5    | 0.0001 | 1     | 0.9967 |
| 100023_at                                                   | 1417656_at   | Mybl2            | myeloblastosis oncogene-like 2                   | -1.75  | 0.41 | 1.42  | 0.0145 | 1.28  | 0.0453 | 1.16    | 0.1448 | 2.44  | 0.1583 |
| 100024_at                                                   | 1422629_s_at | Shrm             | shroom                                           | -1.08  | 0.68 | -1    | 0.9995 | -1.26 | 0.0899 | -1.08   | 0.5601 | -1.12 | 0.4672 |
| 100026_at                                                   | 1450871_a_at | Bcat1            | branched chain aminotransferase 1, cytosoli      | -1.2   | 0.8  | -1.07 | 0.7478 | -1.06 | 0.7933 | 1.11    | 0.6257 | 1.19  | 0.6729 |
| 100029_at                                                   | 1419053_at   | Pex14            | peroxisomal biogenesis factor 14                 | -1.33  | 0.26 | -1.04 | 0.6207 | 1.04  | 0.7261 | -1.12   | 0.1134 | -1.05 | 0.614  |
| 100030_at                                                   | 1448562_at   | Upp1             | uridine phosphorylase 1                          | -1.5   | 0.43 | 1.5   | 0.0114 | 1.23  | 0.0585 | 1.43    | 0.0213 | 1.17  | 0.4779 |
| 100032_at                                                   | 1418180_at   | Sp1              | Trans-acting transcription factor 1              | 1.03   | 0.97 | -1    | 0.9812 | -1.43 | 0.1824 | -1.47   | 0.0954 | 1.42  | 0.1871 |
| 100033_at                                                   | 1416988_at   | Msh2             | mutS homolog 2 (E. coli)                         | 2.1    | 0.05 | 1.13  | 0.5904 | 1.1   | 0.4776 | 1.18    | 0.2821 | 1.63  | 0.2383 |
| 100034_at                                                   | 1421752_a_at | Serp1b5          | serine (or cysteine) proteinase inhibitor, clac  | -2.59  | 0.04 | -1.32 | 0.0901 | 1.1   | 0.5053 | -1.08   | 0.607  | 1.32  | 0.5329 |
| 100035_at                                                   | 1449160_at   | Npr1 /// LOC433t | natriuretic peptide receptor 1 /// similar to Tu | -5.03  | 0.35 | 1.05  | 0.8927 | 1.4   | 0.3748 | 1.04    | 0.9167 | 2.75  | 0.0784 |
| 100039_at                                                   | 1448372_a_at | Tmem4            | transmembrane protein 4                          | -1.01  | 0.92 | -1.3  | 0.017  | -1.02 | 0.7601 | -1.37   | 0.0072 | -1.15 | 0.0829 |
| 100040_at                                                   | 1450866_a_at | Mrpl17           | mitochondrial ribosomal protein L17              | 1.64   | 0.06 | 1.18  | 0.091  | 1.34  | 0.0041 | 1.28    | 0.0271 | 1.25  | 0.1266 |
| 100041_at                                                   | 1456176_x_at | D11Erd333e       | DNA segment, Chr 11, ERATO Doi 333, exp          | -1.18  | 0.11 | -1.09 | 0.1684 | 1.04  | 0.4997 | -1.07   | 0.3121 | 1.04  | 0.7279 |
| 100042_at                                                   | 1424172_at   | Hagh             | hydroxyacyl glutathione hydrolase                | -1.01  | 0.94 | -1.15 | 0.0107 | -1.05 | 0.1805 | -1.25   | 0.0025 | -1.47 | 0.007  |
| 100043_f_at                                                 | 1429457_at   | 2310020A21Rik    | RIKEN cDNA 2310020A21 gene                       | -1.06  | 0.85 | -1.04 | 0.599  | -1.09 | 0.3194 | 1.05    | 0.6008 | 1.59  | 0.0948 |
| 100044_at                                                   | 1416003_at   | Cldn11           | claudin 11                                       | -1.43  | 0.27 | 1.14  | 0.6121 | -1.39 | 0.1646 | 1.26    | 0.3175 | 1.92  | 0.2518 |
| 100046_at                                                   | 1419253_at   | Mthfd2           | methylenetetrahydrofolate dehydrogenase (l       | -2.2   | 0.13 | 1.13  | 0.7688 | 1.18  | 0.5183 | 1.7     | 0.0629 | 1.17  | 0.6865 |
| 100047_at                                                   | 1416828_at   | Snap25           | synaptosomal-associated protein 25               | 1.12   | 0.49 | 1.05  | 0.6373 | 1.1   | 0.4351 | 1.18    | 0.0649 | -1.06 | 0.9263 |
| 100048_at                                                   | 1424139_at   | Rap1a            | RAS-related protein-1a                           | 1.85   | 0.19 | -1.03 | 0.7524 | -1.24 | 0.0258 | -1.29   | 0.0109 | -1.27 | 0.3927 |
| 100050_at                                                   | 1425895_a_at | Id1              | inhibitor of DNA binding 1                       | 1.14   | 0.81 | 1.33  | 0.1777 | 1.12  | 0.5603 | 1.6     | 0.005  | 1.48  | 0.1685 |
| 100051_at                                                   | 1419097_a_at | Stom             | stomatin                                         | -1.41  | 0.11 | 1.07  | 0.3876 | 1.02  | 0.738  | 1.09    | 0.2948 | 1.18  | 0.0167 |
| 100052_at                                                   | 1452522_at   | Stom             | stomatin                                         | -1.03  | 0.92 | 1.47  | 0.1417 | 1.18  | 0.3579 | -1.02   | 0.8965 | 1.42  | 0.2221 |
| 100054_s_at                                                 | 1434119_at   | D2Wsu81e         | DNA segment, Chr 2, Wayne State Universi         | 1.57   | 0.31 | 1.06  | 0.6857 | 1.36  | 0.1491 | 1.26    | 0.1837 | 2.11  | 0.0464 |
| 100056_at                                                   | 1423442_a_at | Fbxw2            | F-box and WD-40 domain protein 2                 | 1.02   | 0.93 | 1.1   | 0.2408 | -1.11 | 0.1749 | -1.07   | 0.1758 | 1.07  | 0.172  |
| 100057_at                                                   | 1436121_a_at | Nsmc1            | non-SMC element 1 homolog (S. cerevisiae)        | 1.59   | 0.06 | -1.03 | 0.5683 | 1.13  | 0.1543 | 1.14    | 0.0066 | 1.19  | 0.125  |
| 100058_at                                                   | 1451975_at   | 2810453106Rik    | RIKEN cDNA 2810453106 gene                       | -1.13  | 0.84 | 1.12  | 0.7645 | -1.68 | 0.1001 | 1.58    | 0.231  | 3.61  | 0.0543 |
| 100059_at                                                   | 1454268_a_at | Cyba             | cytochrome b-245, alpha polypeptide              | 1.31   | 0.46 | 1.23  | 0.4371 | -1.13 | 0.2391 | 1.61    | 0.3138 | 1.03  | 0.8729 |
| 100061_f_at                                                 | 1455977_x_at | Klk6 /// Klk5    | kallikrein 6 /// kallikrein 5                    | 1.13   | 0.48 | 1.42  | 0.4442 | 2.29  | 0.0246 | 1.19    | 0.4989 | 1.49  | 0.0607 |
| 100064_f_at                                                 | 1438973_x_at | Gja1             | gap junction membrane channel protein alpl       | 1.34   | 0.38 | -1.05 | 0.6067 | 1     | 0.9693 | -1.33   | 0.0066 | 1.68  | 0.0004 |
| 100065_r_at                                                 | 1415800_at   | Gja1             | gap junction membrane channel protein alpl       | -1.2   | 0.29 | 1.39  | 0.0917 | 1.23  | 0.2158 | 1.19    | 0.4748 | 1.67  | 0.3229 |
| 100066_at                                                   | 1416283_at   | Gart             | phosphoribosylglycinamide formyltransferas       | 1.12   | 0.59 | -1.02 | 0.7392 | 1.01  | 0.8983 | -1.01   | 0.8624 | -1.12 | 0.1647 |

|             |              |               |                                                |       |      |       |        |       |        |       |        |       |        |
|-------------|--------------|---------------|------------------------------------------------|-------|------|-------|--------|-------|--------|-------|--------|-------|--------|
| 100068_at   | 1416468_at   | Aldh1a1       | aldehyde dehydrogenase family 1, subfamily     | -1.01 | 0.95 | 1.03  | 0.5379 | -1.11 | 0.1383 | 1.01  | 0.8081 | -1.61 | 0.0066 |
| 100069_at   | 1448792_a_at | Cyp2f2        | cytochrome P450, family 2, subfamily f, poly   | -2.35 | 0.11 | -2.4  | 0      | -1.75 | 0.0017 | -4.4  | 0      | -6.62 | 0.0035 |
| 100072_at   | 1450953_at   | Wdr39         | WD repeat domain 39                            | 1.6   | 0.08 | 1.03  | 0.6354 | 1.3   | 0.0204 | 1.04  | 0.5607 | -1.11 | 0.4442 |
| 100073_at   | 1449072_a_at | 2510005D08Rik | RIKEN cDNA 2510005D08 gene                     | 1.29  | 0.36 | -1.06 | 0.4808 | -1.03 | 0.7734 | -1.03 | 0.6922 | 1.01  | 0.8833 |
| 100074_at   | 1439448_x_at | Tmed9         | Transmembrane emp24 protein transport dc       | -1.03 | 0.89 | -1.41 | 0.0008 | -1.59 | 0.0019 | -1.83 | 0      | -1.73 | 0.0035 |
| 100078_at   | 1436504_x_at | ---           | ---                                            | -1.13 | 0.69 | -3.96 | 0      | 1.1   | 0.6853 | -3.3  | 0      | -4.67 | 0.0001 |
| 100079_at   | 1452184_at   | Ndufb9        | NADH dehydrogenase (ubiquinone) 1 beta s       | 1.28  | 0.04 | -1.04 | 0.565  | 1.02  | 0.7126 | 1.07  | 0.3868 | -1.12 | 0.378  |
| 100080_at   | 1419348_at   | Psp           | parotid secretory protein                      | -2.2  | 0.2  | 1.12  | 0.6501 | 1.19  | 0.546  | -1.52 | 0.0767 | 1.23  | 0.4043 |
| 100081_at   | 1415909_at   | Stip1         | stress-induced phosphoprotein 1                | 1.25  | 0.24 | -1.42 | 0.0006 | -1.37 | 0.013  | -1.48 | 0.0003 | 1.01  | 0.944  |
| 100085_at   | 1448485_at   | Ggt1          | gamma-glutamyltransferase 1                    | 1.78  | 0.24 | -1.21 | 0.4145 | -1.04 | 0.8604 | -1.25 | 0.4191 | 2.37  | 0.0518 |
| 100086_at   | 1452148_at   | Lrpap1        | low density lipoprotein receptor-related prote | 1.23  | 0.37 | -1.09 | 0.2467 | 1.08  | 0.3384 | 1.04  | 0.6894 | -1.08 | 0.6397 |
| 100088_at   | 1433540_x_at | Ppp1cb        | protein phosphatase 1, catalytic subunit, bet  | 1.04  | 0.91 | 1.3   | 0.0168 | 1.16  | 0.1657 | 1.37  | 0.0052 | -1    | 0.9917 |
| 100089_at   | 1416498_at   | Ppic          | peptidylprolyl isomerase C                     | 1.47  | 0.08 | 1.31  | 0.0097 | 1.19  | 0.3706 | 1.27  | 0.0355 | 1.19  | 0.6134 |
| 100091_at   | 1448769_at   | Slc35b1       | solute carrier family 35, member B1            | -1.31 | 0.04 | -1.18 | 0.0528 | -1.15 | 0.1995 | -1.2  | 0.039  | -2.18 | 0.0056 |
| 100093_at   | 1460169_a_at | Pctk1         | PCTAIRE-motif protein kinase 1                 | -1.03 | 0.81 | 1.03  | 0.7074 | 1     | 0.9906 | 1.12  | 0.1077 | 1.09  | 0.3146 |
| 100094_at   | 1424255_at   | Supt5h        | suppressor of Ty 5 homolog (S. cerevisiae)     | 1.64  | 0.03 | 1.18  | 0.0259 | 1.16  | 0.1363 | 1.4   | 0      | 1.47  | 0.0022 |
| 100095_at   | 1416050_a_at | Scarb1        | scavenger receptor class B, member 1           | 1.33  | 0.53 | 1.45  | 0.0004 | 1.06  | 0.6901 | 1.55  | 0.0001 | 1.23  | 0.1785 |
| 100099_at   | 1448621_a_at | Smpd1         | sphingomyelin phosphodiesterase 1, acid ly:    | -1.4  | 0.28 | -1.17 | 0.0121 | -1.15 | 0.26   | -1.26 | 0.004  | -1.34 | 0.0213 |
| 100101_at   | 1417274_at   | Snrpa         | small nuclear ribonucleoprotein polypeptide    | 1.43  | 0.14 | 1.01  | 0.8869 | -1.12 | 0.1921 | -1.08 | 0.2411 | -1.25 | 0.3157 |
| 100104_r_at | 1422435_at   | 2210010C04Rik | RIKEN cDNA 2210010C04 gene                     | -1.84 | 0.37 | 1.05  | 0.73   | -1    | 0.9927 | -1.09 | 0.6554 | 1.63  | 0.2242 |
| 100106_at   | 1417370_at   | Tff3          | trefoil factor 3, intestinal                   | 1.8   | 0.46 | 2.51  | 0.1754 | 2.21  | 0.3423 | 8.28  | 0.0489 | 2.7   | 0.2278 |
| 100112_at   | 1417574_at   | Cxcl12        | chemokine (C-X-C motif) ligand 12              | -1.02 | 0.93 | -1.03 | 0.6108 | -1.01 | 0.7813 | -1.28 | 0.002  | -1.14 | 0.1816 |
| 100113_s_at | 1451783_a_at | Kifap3        | kinesin-associated protein 3                   | 1.28  | 0.27 | 1.04  | 0.8351 | -1.06 | 0.7429 | -1.3  | 0.2288 | 1.56  | 0.0766 |
| 100115_at   | 1426289_at   | 2610028H07Rik | RIKEN cDNA 2610028H07 gene                     | -1.24 | 0.29 | -1.05 | 0.3118 | -1.02 | 0.7375 | 1.04  | 0.639  | 1.18  | 0.0696 |
| 100116_at   | 1419153_at   | 2810417H13Rik | RIKEN cDNA 2810417H13 gene                     | 1.01  | 0.98 | 1.54  | 0.0519 | -1.05 | 0.7281 | 1.68  | 0.041  | 1.72  | 0.019  |
| 100120_at   | 1416808_at   | Nid1          | nidogen 1                                      | -1.42 | 0.13 | 1.01  | 0.9548 | -1.08 | 0.6358 | 1.27  | 0.1319 | 1.58  | 0.0542 |
| 100122_at   | 1422208_a_at | Gnb5          | guanine nucleotide binding protein, beta 5     | 1.26  | 0.56 | 1.5   | 0.2876 | -1.16 | 0.7197 | -1.33 | 0.4765 | 1.45  | 0.4104 |
| 100125_at   | 1450854_at   | Pa2g4         | proliferation-associated 2G4                   | 1.49  | 0.2  | -1.02 | 0.8739 | 1.15  | 0.1117 | 1.13  | 0.171  | -1.09 | 0.6973 |
| 100126_at   | 1422505_at   | Chrac1        | chromatin accessibility complex 1              | 1.62  | 0.01 | 1.2   | 0.0018 | 1.31  | 0      | 1.31  | 0      | 1.14  | 0.3369 |
| 100127_at   | 1451191_at   | Crabp2        | cellular retinoic acid binding protein II      | 1.15  | 0.85 | -1.23 | 0.4247 | 1.2   | 0.6328 | -1.22 | 0.5199 | -1.38 | 0.5346 |
| 100128_at   | 1448314_at   | Cdc2a         | cell division cycle 2 homolog A (S. pombe)     | 2.37  | 0.38 | 2.45  | 0.2273 | -1.03 | 0.8078 | 3.06  | 0.0661 | 2.01  | 0.1028 |
| 100130_at   | 1448694_at   | Jun           | Jun oncogene                                   | 1.86  | 0.16 | 1.86  | 0.1434 | 1.28  | 0.5023 | 1.35  | 0.4201 | 2.77  | 0.0052 |
| 100131_at   | 1423150_at   | Sgne1         | secretory granule neuroendocrine protein 1,    | -2.45 | 0.38 | 1.05  | 0.8996 | 1.05  | 0.8964 | 1.36  | 0.3294 | 1.11  | 0.8231 |
| 100133_at   | 1448765_at   | ---           | ---                                            | 1.15  | 0.36 | 1.12  | 0.345  | 1.1   | 0.5668 | 1.03  | 0.8444 | -1.04 | 0.8264 |
| 100134_at   | 1417271_a_at | Eng           | endoglin                                       | -1.27 | 0.16 | -1.15 | 0.1841 | 1.09  | 0.2651 | -1.22 | 0.0876 | -1.11 | 0.3748 |
| 100136_at   | 1416344_at   | Lamp2         | lysosomal membrane glycoprotein 2              | 1.33  | 0.24 | -1.21 | 0.0087 | -1.24 | 0.0108 | -1.13 | 0.086  | -1.91 | 0      |
| 100138_f_at | 1456566_x_at | Rbm14         | RNA binding motif protein 14                   | 1.84  | 0.06 | -1.18 | 0.096  | 1.25  | 0.0764 | 1.02  | 0.8799 | 1.18  | 0.6764 |
| 100139_at   | 1416965_at   | Pcsk1n        | proprotein convertase subtilisin/kexin type 1  | -1.3  | 0.14 | -1.21 | 0.2481 | -1.03 | 0.8246 | -1.45 | 0.0171 | 1.64  | 0.0725 |
| 100142_at   | 1421810_at   | ---           | ---                                            | 1.13  | 0.65 | -1.15 | 0.0356 | -1.11 | 0.1083 | -1.16 | 0.0163 | 1.17  | 0.4142 |
| 100144_at   | 1456528_x_at | ---           | ---                                            | 2.18  | 0    | 1.22  | 0.0004 | 1.08  | 0.542  | 1.28  | 0.0027 | 1.62  | 0.0055 |
| 100147_at   | 1423644_at   | Aco1          | aconitase 1                                    | -1.49 | 0.47 | -1.6  | 0.0038 | -1.07 | 0.538  | -1.48 | 0.0114 | -1.65 | 0.2683 |
| 100148_at   | 1418330_at   | Ctcf          | CCCTC-binding factor                           | -1.4  | 0.48 | 1.05  | 0.5301 | 1.08  | 0.4323 | 1.08  | 0.246  | 1.02  | 0.9757 |
| 100151_at   | 1455550_x_at | ---           | ---                                            | -1.19 | 0.13 | 1.12  | 0.0337 | 1.14  | 0.0378 | 1.14  | 0.0804 | -1.09 | 0.4028 |
| 100152_at   | 1421966_at   | Ncam1         | neural cell adhesion molecule 1                | 3.21  | 0.06 | -1.57 | 0.1074 | 1.35  | 0.381  | -1.02 | 0.9415 | 1.79  | 0.1962 |
| 100153_at   | 1426864_a_at | Ncam1         | neural cell adhesion molecule 1                | -1.13 | 0.61 | -1.08 | 0.4664 | -1.04 | 0.7159 | -1.21 | 0.1494 | 1.17  | 0.4529 |
| 100154_at   | 1421812_at   | ---           | ---                                            | 1.37  | 0.15 | 1.29  | 0.3905 | -1.14 | 0.0798 | 1.47  | 0.1748 | -1.38 | 0.0524 |
| 100155_at   | 1456226_x_at | Ddr1          | discoidin domain receptor family, member 1     | 5.26  | 0    | 1.06  | 0.6871 | 1.04  | 0.8484 | 1.38  | 0.0977 | -1.17 | 0.5823 |
| 100156_at   | 1415945_at   | Mcm5          | minichromosome maintenance deficient 5, c      | 2.07  | 0.23 | 1.2   | 0.4551 | -1.18 | 0.2918 | 1.44  | 0.1416 | -1.03 | 0.9249 |
| 100213_f_at | 1455578_x_at | Rpl41         | ribosomal protein L41                          | 1.06  | 0.41 | -1.06 | 0.3256 | 1.13  | 0.0071 | -1.03 | 0.6541 | 1.31  | 0.0009 |
| 100272_at   | 1452563_a_at | Jarid1d       | jumonji, AT rich interactive domain 1D (Rbp:   | -1.95 | 0.32 | 1.11  | 0.6331 | 1.05  | 0.8267 | -1.26 | 0.1731 | -2.34 | 0.0507 |
| 100277_at   | 1422053_at   | Inhba         | inhibin beta-A                                 | 1.22  | 0.65 | -1.47 | 0.0287 | -1.59 | 0.0275 | -1.6  | 0.0087 | -2.46 | 0.0018 |
| 100278_at   | 1419497_at   | Cdkn1b        | cyclin-dependent kinase inhibitor 1B (P27)     | -1.57 | 0.13 | -1.31 | 0.286  | -1.38 | 0.196  | -1.65 | 0.0786 | 1.15  | 0.5703 |
| 100279_at   | 1421890_at   | St3gal2       | ST3 beta-galactoside alpha-2,3-sialyltransfe   | -1.47 | 0.26 | 1.12  | 0.3346 | 1.01  | 0.968  | 1.02  | 0.8932 | 1.08  | 0.473  |

|             |              |                     |                                                  |       |      |        |        |       |        |        |        |       |        |
|-------------|--------------|---------------------|--------------------------------------------------|-------|------|--------|--------|-------|--------|--------|--------|-------|--------|
| 100280_at   | 1450608_at   | Hist1h1t            | histone 1, H1t                                   | -1.79 | 0.02 | 1.01   | 0.9343 | 1.19  | 0.3728 | 1.11   | 0.6163 | 1.46  | 0.0964 |
| 100282_at   | 1422235_at   | Htr7                | 5-hydroxytryptamine (serotonin) receptor 7       | -1.42 | 0.23 | -1     | 0.9639 | 1.11  | 0.3878 | -1.04  | 0.7399 | 1.14  | 0.2956 |
| 100283_at   | 1424985_a_at | Sox10               | SRY-box containing gene 10                       | 1.23  | 0.56 | -1.05  | 0.6227 | -1.02 | 0.8613 | -1.21  | 0.059  | 1.15  | 0.5108 |
| 100284_at   | 1421539_at   | Zic4                | zinc finger protein of the cerebellum 4          | -3.03 | 0.19 | -1.06  | 0.6871 | 1.09  | 0.5915 | 1.08   | 0.8051 | 1.41  | 0.4228 |
| 100286_at   | 1418267_at   | Mst1                | macrophage stimulating 1 (hepatocyte grow        | -1.02 | 0.86 | -1.03  | 0.5157 | 1.04  | 0.4432 | 1.16   | 0.0393 | 1.05  | 0.7447 |
| 100287_at   | 1430512_a_at | MGI:1354380         | immunoglobulin (CD79A) binding protein 1b        | -2.32 | 0.37 | 1.59   | 0.1257 | 1.61  | 0.1034 | 1.51   | 0.1159 | 1.4   | 0.4363 |
| 100290_f_at | 1455488_at   | 6230416J20Rik       | RIKEN cDNA 6230416J20 gene                       | 7.14  | 0.05 | 1.08   | 0.7313 | -1.35 | 0.466  | 1.35   | 0.1719 | 1.67  | 0.079  |
| 100291_at   | 1450457_at   | Cbl                 | Casitas B-lineage lymphoma                       | 1.06  | 0.91 | 1.23   | 0.3131 | 1.23  | 0.3483 | 1.2    | 0.4192 | 1.24  | 0.2108 |
| 100292_at   | 1449105_at   | Sh2d2a              | SH2 domain protein 2A                            | -1.18 | 0.57 | 1.23   | 0.0688 | 1.07  | 0.3621 | 1.02   | 0.8388 | 1.81  | 0.1682 |
| 100294_at   | 1421229_at   | Dffb                | DNA fragmentation factor, beta subunit           | -1.36 | 0.68 | 1.26   | 0.5594 | 1.56  | 0.1793 | 1.27   | 0.4938 | -1.01 | 0.9861 |
| 100297_at   | 1438234_at   | Wdr26               | WD repeat domain 26                              | -1.19 | 0.77 | 1.12   | 0.4548 | -1.52 | 0.0209 | 1.01   | 0.9482 | 1.42  | 0.0613 |
| 100298_at   | 1450375_at   | Pspn                | persephin                                        | -1.22 | 0.42 | 1.29   | 0.0223 | 1.22  | 0.1308 | 1.24   | 0.0529 | 1.39  | 0.2383 |
| 100300_at   | 1422978_at   | Cybb                | cytochrome b-245, beta polypeptide               | -1.59 | 0.14 | 2.15   | 0.205  | -1.16 | 0.4902 | 2.49   | 0.1998 | 1.17  | 0.5451 |
| 100301_at   | 1422986_at   | Esrrb               | estrogen related receptor, beta                  | 1.1   | 0.52 | 1.59   | 0.02   | 1.65  | 0.0221 | 1.55   | 0.1288 | -1.32 | 0.2687 |
| 100303_at   | 1450587_at   | H2-M10.1            | histocompatibility 2, M region locus 10.1        | 1.68  | 0.27 | -1.02  | 0.9309 | -1.36 | 0.2273 | 1.3    | 0.4594 | 1.09  | 0.8011 |
| 100306_at   | 1459902_at   | 2700007P21Rik       | RIKEN cDNA 2700007P21 gene                       | 3.39  | 0    | 1.17   | 0.3392 | 1.06  | 0.7588 | 1.32   | 0.1054 | 1.91  | 0.0882 |
| 100307_at   | 1459909_at   | Nfix                | Nuclear factor I/X                               | -1.51 | 0.03 | -1.52  | 0.0004 | -1.04 | 0.7957 | -1.45  | 0.0044 | -1.25 | 0.1693 |
| 100308_at   | 1418440_at   | Col8a1              | procollagen, type VIII, alpha 1                  | 1.08  | 0.8  | 1.17   | 0.345  | 1.18  | 0.494  | 1.07   | 0.7173 | 2.31  | 0.1905 |
| 100309_at   | 1422990_at   | Met                 | met proto-oncogene                               | -1.27 | 0.33 | 1.67   | 0.0591 | 1.24  | 0.4572 | 1.5    | 0.151  | -2.21 | 0.3083 |
| 100311_f_at | 1421802_at   | Ear1                | eosinophil-associated, ribonuclease A family     | 2.74  | 0.07 | 1.55   | 0.3989 | -1.23 | 0.507  | 1.72   | 0.3232 | 1.66  | 0.0237 |
| 100317_at   | 1422159_at   | Ppef2               | protein phosphatase, EF hand calcium-bindi       | -2.39 | 0.08 | -1.32  | 0.2266 | 1.01  | 0.9607 | -1.72  | 0.0389 | 1.47  | 0.4155 |
| 100318_at   | 1431119_at   | 1700014P03Rik       | RIKEN cDNA 1700014P03 gene                       | 1.14  | 0.6  | 1.04   | 0.7454 | -1.01 | 0.8553 | -1.02  | 0.8674 | 1.13  | 0.5261 |
| 100319_at   | 1450330_at   | Il10                | interleukin 10                                   | 1.07  | 0.9  | -1.34  | 0.5385 | -1.13 | 0.7918 | 1.88   | 0.1254 | 1.38  | 0.501  |
| 100321_f_at | 1449910_at   | 2210418O10Rik       | RIKEN cDNA 2210418O10 gene                       | -1.01 | 0.99 | -1.16  | 0.1335 | -1.35 | 0.011  | -1.32  | 0.0254 | -1.14 | 0.6066 |
| 100324_g_at | 1416835_s_at | Amd1 /// Amd2       | S-adenosylmethionine decarboxylase 1 /// S       | 1.12  | 0.78 | 1.12   | 0.4441 | 1.29  | 0.1693 | 1.06   | 0.6787 | -1.02 | 0.9542 |
| 100326_f_at | 1425417_x_at | ---                 | ---                                              | -1.17 | 0.59 | -1.21  | 0.1918 | -1.22 | 0.1655 | -1.01  | 0.929  | 1.11  | 0.4693 |
| 100328_s_at | 1420464_s_at | Pira1 /// Pira2 /// | paired-Ig-like receptor A1 /// paired-Ig-like re | -2.04 | 0.03 | 1.05   | 0.85   | -1.22 | 0.1319 | 1.56   | 0.3727 | 1.08  | 0.6581 |
| 100331_g_at | 1418506_a_at | Prdx2               | peroxiredoxin 2                                  | 1.56  | 0.01 | 1.29   | 0      | 1.12  | 0.0336 | 1.39   | 0      | 1.35  | 0.0295 |
| 100332_s_at | 1423223_a_at | Prdx6               | peroxiredoxin 6                                  | 1.6   | 0.17 | 1.02   | 0.7389 | -1.17 | 0.3489 | 1.1    | 0.4393 | -1.3  | 0.3318 |
| 100334_f_at | 1421788_x_at | Klk13               | kallikrein 13                                    | 1.07  | 0.85 | -1.08  | 0.6073 | 1.05  | 0.7362 | 1.03   | 0.8    | 1.31  | 0.2481 |
| 100335_at   | 1450283_at   | Atp7b               | ATPase, Cu++ transporting, beta polypeptid       | -1.86 | 0.38 | -1.01  | 0.9075 | -1.33 | 0.1751 | -1.09  | 0.6003 | 1.48  | 0.2657 |
| 100336_s_at | 1449880_s_at | Bglap-rs1 /// Bgl   | bone gamma-carboxyglutamate protein, rela        | -1.03 | 0.65 | -1.4   | 0.0179 | 1.02  | 0.886  | -1.18  | 0.1819 | 1.45  | 0.0155 |
| 100337_at   | 1421692_at   | Cacna1e             | calcium channel, voltage-dependent, R type       | -3.14 | 0.25 | 1.39   | 0.3353 | -1.13 | 0.5593 | 1.29   | 0.4707 | 1.04  | 0.884  |
| 100339_at   | 1424898_at   | Slc10a1             | solute carrier family 10 (sodium/bile acid cot   | -1.21 | 0.34 | -1.48  | 0      | -1.01 | 0.9294 | -1.23  | 0.0135 | -1.43 | 0.0533 |
| 100341_g_at | 1450261_a_at | Slc10a1             | solute carrier family 10 (sodium/bile acid cot   | -1.42 | 0.26 | -1.53  | 0      | 1.01  | 0.883  | -1.36  | 0.0005 | -1.59 | 0.0089 |
| 100343_f_at | 1418884_x_at | Tuba1               | tubulin, alpha 1                                 | -1.24 | 0.12 | -1.39  | 0.0307 | -1.11 | 0.3268 | -1.42  | 0.011  | -1.88 | 0.0263 |
| 100344_at   | 1460696_at   | BC026585            | cDNA sequence BC026585                           | 1.38  | 0.05 | -1.13  | 0.4438 | -1.09 | 0.4729 | -1.39  | 0.0429 | 1.06  | 0.7801 |
| 100346_at   | 1420795_at   | Fgf9                | fibroblast growth factor 9                       | -1.82 | 0.26 | -1.07  | 0.7747 | 1.06  | 0.8293 | -1.25  | 0.332  | 1.64  | 0.3723 |
| 100347_at   | 1447986_at   | D17892              | expressed sequence D17892                        | 1.07  | 0.15 | 1.06   | 0.5053 | 1.05  | 0.4636 | 1.1    | 0.2455 | 1.15  | 0.2491 |
| 100348_at   | 1456319_at   | X83313              | EST X83313                                       | 1.41  | 0.55 | -1.01  | 0.9805 | -1.13 | 0.7146 | 1.03   | 0.9213 | -3.09 | 0.1928 |
| 100350_at   | 1441583_at   | ---                 | Transcribed locus, moderately similar to NP_     | -1.01 | 0.95 | 1.01   | 0.9594 | -1.17 | 0.6181 | 1.13   | 0.6718 | 1.59  | 0.18   |
| 100355_g_at | 1422195_s_at | Tbx15               | T-box 15                                         | -1.04 | 0.95 | 1.5    | 0.1295 | 1.36  | 0.2495 | 1.46   | 0.2783 | 1.44  | 0.4123 |
| 100358_s_at | 1422225_s_at | Tcp10a /// Tcp1     | t-complex protein 10a /// t-complex protein 1    | 1.59  | 0.22 | 1      | 0.9979 | -1.12 | 0.6612 | -1.49  | 0.1842 | 1.05  | 0.9171 |
| 100359_at   | 1427421_at   | Tcp10c              | T-complex protein 10c                            | -1.85 | 0.24 | -1.37  | 0.0835 | 1.07  | 0.7147 | -2.2   | 0.0036 | 1.71  | 0.23   |
| 100364_at   | 1426106_a_at | Syt6                | synaptotagmin 6                                  | -1.01 | 0.97 | 1.21   | 0.4504 | -1.24 | 0.3383 | -1.07  | 0.7785 | 1.03  | 0.8653 |
| 100368_at   | 1426125_a_at | Casp9               | caspase 9                                        | -1.87 | 0.58 | -1.09  | 0.4131 | -1.57 | 0.0387 | -1.71  | 0.0094 | -1.96 | 0.0471 |
| 100374_at   | 1423582_at   | ---                 | ---                                              | -1.27 | 0.68 | 1.03   | 0.7675 | 1.33  | 0.0151 | 1.14   | 0.251  | -1.17 | 0.6691 |
| 100378_at   | 1459701_x_at | ---                 | ---                                              | 1.41  | 0.56 | -2.03  | 0.0018 | -1.53 | 0.0937 | -1.74  | 0.0344 | 1.46  | 0.3084 |
| 100380_at   | 1434127_a_at | H3f3a               | H3 histone, family 3A                            | -1.18 | 0.5  | 1.29   | 0.0055 | 1.18  | 0.1626 | 1.34   | 0.0013 | -1.1  | 0.4426 |
| 100381_at   | 1427735_a_at | Acta1               | actin, alpha 1, skeletal muscle                  | 1.18  | 0.78 | -16.59 | 0.1812 | -7.78 | 0.2144 | -30.65 | 0.1693 | 1.46  | 0.2005 |
| 100382_at   | 1421517_at   | St6galnac1          | ST6 (alpha-N-acetylneuraminyl-2,3-beta-ga        | 1.4   | 0.41 | 1.22   | 0.1916 | -1.01 | 0.9626 | 1.32   | 0.0851 | 1.48  | 0.3448 |
| 100383_at   | 1460385_a_at | Zfp179              | zinc finger protein 179                          | 1.27  | 0.59 | 1.04   | 0.8674 | -1.24 | 0.3756 | 1.31   | 0.3141 | 2.58  | 0.052  |
| 100384_at   | 1425786_a_at | Hsf4                | heat shock transcription factor 4                | 1.81  | 0.27 | 1.41   | 0.1764 | 1.18  | 0.592  | 1.34   | 0.4222 | 1.34  | 0.1109 |

|             |              |              |                                                 |       |      |       |        |       |        |       |        |        |        |
|-------------|--------------|--------------|-------------------------------------------------|-------|------|-------|--------|-------|--------|-------|--------|--------|--------|
| 100385_at   | 1422277_at   | Glra1        | glycine receptor, alpha 1 subunit               | -1.59 | 0.41 | -1.01 | 0.9576 | 1.02  | 0.8369 | -1.1  | 0.5678 | 1.26   | 0.2845 |
| 100390_s_at | 1450571_a_at | Bfsp1        | beaded filament structural protein in lens-CF   | 1.45  | 0.49 | -1.09 | 0.5713 | -1    | 0.9875 | -1.23 | 0.1418 | 2.61   | 0.0031 |
| 100391_at   | 1420931_at   | Mapk8        | mitogen activated protein kinase 8              | -2.46 | 0.27 | 1.15  | 0.6624 | 1.09  | 0.801  | -1.02 | 0.9485 | 1.66   | 0.1573 |
| 100394_at   | 1417396_at   | Podxl        | podocalyxin-like                                | -1.63 | 0.63 | 1.17  | 0.2385 | 1.17  | 0.239  | 1.25  | 0.173  | 1.33   | 0.2795 |
| 100397_at   | 1450792_at   | Tyrobp       | TYRO protein tyrosine kinase binding protei     | 1.43  | 0.14 | 1.69  | 0.1974 | -1.03 | 0.835  | 1.96  | 0.1958 | 1.04   | 0.8709 |
| 100398_at   | 1449841_at   | Kif3a        | kinesin family member 3A                        | 2.49  | 0.02 | -1.11 | 0.4531 | 1.08  | 0.6999 | -1.19 | 0.2307 | -1.37  | 0.3321 |
| 100400_at   | 1416668_at   | 4921531G14Ri | RIKEN cDNA 4921531G14 gene                      | 2.25  | 0    | 1.14  | 0.4169 | 1.09  | 0.6427 | 1.12  | 0.3426 | -1.22  | 0.2401 |
| 100401_at   | 1420952_at   | Son          | Son cell proliferation protein                  | -1.07 | 0.6  | 1.22  | 0.0678 | -1.07 | 0.588  | 1.11  | 0.4599 | 1.32   | 0.0932 |
| 100403_at   | 1449071_at   | Myl7         | myosin, light polypeptide 7, regulatory         | -1.03 | 0.96 | -1.09 | 0.5364 | -1.17 | 0.163  | -1.13 | 0.312  | 1.4    | 0.3473 |
| 100404_at   | 1448652_at   | Ttc10        | tetratricopeptide repeat domain 10              | -1.28 | 0.18 | 1.09  | 0.1811 | -1.15 | 0.1445 | -1.07 | 0.4619 | 1.31   | 0.0202 |
| 100406_at   | 1423544_at   | Ptpn5        | protein tyrosine phosphatase, non-receptor t    | -1.5  | 0.45 | 1.35  | 0.3225 | 1.06  | 0.862  | 1.09  | 0.7562 | 1.61   | 0.0264 |
| 100407_at   | 1460668_at   | Gal          | galanin                                         | -1.03 | 0.83 | 1.25  | 0.0052 | 1.15  | 0.0316 | 1.1   | 0.1952 | 1.08   | 0.6849 |
| 100408_at   | 1421015_s_at | Pole3        | polymerase (DNA directed), epsilon 3 (p17 s     | 1.24  | 0.24 | -1.32 | 0.0703 | -1.11 | 0.4127 | -1.18 | 0.1347 | 1.27   | 0.3547 |
| 100409_at   | 1426673_at   | Cdh3         | cadherin 3                                      | 1.13  | 0.74 | -1.22 | 0.1299 | -1.08 | 0.4501 | -1.16 | 0.1361 | -1.01  | 0.8663 |
| 100410_at   | 1429558_a_at | C330027G06Ri | RIKEN cDNA C330027G06 gene                      | 2.57  | 0.1  | 1.17  | 0.3248 | -1.28 | 0.169  | -1.02 | 0.8921 | 1.55   | 0.3236 |
| 100412_g_at | 1450637_a_at | Aebp1        | AE binding protein 1                            | 2.14  | 0    | -1.16 | 0.4493 | -1.25 | 0.112  | 1.08  | 0.7472 | 2.02   | 0.2994 |
| 100413_at   | 1424532_at   | Ylpm1        | YLP motif containing 1                          | 1.49  | 0.02 | 1.09  | 0.2753 | 1.03  | 0.7383 | -1.01 | 0.8303 | 1.19   | 0.2116 |
| 100414_s_at | 1415960_at   | Mpo          | myeloperoxidase                                 | -1.22 | 0.72 | 1.22  | 0.3145 | 1.08  | 0.5554 | 1.31  | 0.2775 | -1.09  | 0.6966 |
| 100416_at   | 1416558_at   | Melk         | maternal embryonic leucine zipper kinase        | 1.12  | 0.8  | -1.58 | 0.1054 | 1.26  | 0.6601 | -1.09 | 0.7739 | 2.58   | 0.027  |
| 100418_at   | 1418451_at   | Gng2         | guanine nucleotide binding protein (G protei    | 1.07  | 0.89 | 1.15  | 0.4866 | -1.11 | 0.6446 | 1.19  | 0.4532 | 1.09   | 0.6599 |
| 100420_at   | 1427268_at   | LOC433621    | similar to Acidic ribosomal phosphoprotein F    | -2.99 | 0.02 | -1.13 | 0.4417 | -1.31 | 0.0357 | -1.33 | 0.0262 | -1.19  | 0.5295 |
| 100421_at   | 1418735_at   | Krt2-4       | keratin complex 2, basic, gene 4                | -1.57 | 0    | -1.01 | 0.8767 | -1.08 | 0.4589 | -1.02 | 0.7926 | 1.23   | 0.043  |
| 100423_f_at | 1421469_a_at | Stat5a       | signal transducer and activator of transcripti  | -1.46 | 0.03 | -1.13 | 0.2235 | -1.15 | 0.2093 | -1.11 | 0.2639 | 1.28   | 0.0621 |
| 100425_at   | 1418261_at   | Syk          | spleen tyrosine kinase                          | -1.41 | 0.13 | 1.02  | 0.8457 | 1.02  | 0.7981 | 1.1   | 0.5253 | 1.29   | 0.2298 |
| 100426_s_at | 1425797_a_at | Syk          | spleen tyrosine kinase                          | -1.13 | 0.15 | 1.06  | 0.5227 | 1.15  | 0.1463 | 1.1   | 0.3315 | 1.22   | 0.316  |
| 100427_at   | 1417676_a_at | Ptpro        | protein tyrosine phosphatase, receptor type,    | 1.15  | 0.74 | 1.1   | 0.7074 | -1.01 | 0.9708 | 1.15  | 0.6021 | 1.81   | 0.0972 |
| 100428_at   | 1421279_at   | Lamc2        | laminin, gamma 2                                | -2.58 | 0.07 | -1.49 | 0.0368 | -1.13 | 0.4091 | -1.26 | 0.206  | -1.13  | 0.5438 |
| 100429_at   | 1416618_at   | Ppox         | protoporphyrinogen oxidase                      | 1.45  | 0.24 | -1.16 | 0.1629 | -1.17 | 0.1169 | -1.13 | 0.1987 | -1.31  | 0.1279 |
| 100430_at   | 1425873_a_at | Lepr         | leptin receptor                                 | -3.61 | 0.1  | -1.14 | 0.5338 | -1.11 | 0.767  | -1.21 | 0.4231 | 1.56   | 0.2729 |
| 100431_at   | 1425644_at   | Lepr         | leptin receptor                                 | 3.23  | 0.23 | 2.59  | 0.1299 | 7.7   | 0.1662 | 7.89  | 0.0358 | 23.26  | 0.0855 |
| 100434_s_at | 1420713_a_at | Mdf1         | MyoD family inhibitor                           | 1.11  | 0.74 | 1.06  | 0.4537 | -1.16 | 0.2557 | 1.16  | 0.4009 | -1.43  | 0.4362 |
| 100435_at   | 1417143_at   | Edg2         | endothelial differentiation, lysophosphatidic ; | -1.38 | 0.21 | -1.04 | 0.774  | 1.07  | 0.6092 | -1    | 0.9748 | 1.18   | 0.5295 |
| 100437_g_at | 1451054_at   | Orm1         | orosomucoid 1                                   | -2.05 | 0.03 | -1.21 | 0.2284 | -1.12 | 0.1558 | -1.08 | 0.6379 | -13.45 | 0.0004 |
| 100438_at   | 1421756_a_at | Gpr19        | G protein-coupled receptor 19                   | -1.66 | 0.24 | 1.56  | 0.0049 | 1.53  | 0.0304 | 1.45  | 0.0234 | 1.1    | 0.7897 |
| 100440_f_at | 1419421_at   | Ank1         | ankyrin 1, erythroid                            | -1.31 | 0.26 | 1.11  | 0.1066 | 1.02  | 0.7857 | 1.09  | 0.1637 | 1.45   | 0.0077 |
| 100443_at   | 1425764_a_at | Bcat2        | branched chain aminotransferase 2, mitochc      | -1.22 | 0.31 | 1.08  | 0.5401 | 1.21  | 0.1701 | -1    | 0.9927 | 1.35   | 0.1349 |
| 100444_at   | 1450674_at   | Cdk5         | cyclin-dependent kinase 5                       | 1.21  | 0.25 | 1.01  | 0.8579 | -1.09 | 0.4717 | 1.01  | 0.799  | -1.2   | 0.5383 |
| 100447_at   | 1448679_at   | Hyal2        | hyaluronidase 2                                 | -1.01 | 0.99 | 1.02  | 0.8263 | -1.08 | 0.4987 | -1.1  | 0.3483 | -1.56  | 0.0833 |
| 100450_r_at | 1451604_a_at | Acvr1        | activin A receptor, type II-like 1              | 1.76  | 0.08 | -1.23 | 0.1729 | -1.01 | 0.9209 | -1.1  | 0.3169 | -1.17  | 0.3148 |
| 100451_at   | 1424622_at   | Hsf1         | heat shock factor 1                             | 1.57  | 0.18 | 1.31  | 0.162  | 1.65  | 0.027  | 1.35  | 0.1514 | -1.26  | 0.3518 |
| 100452_at   | 1418600_at   | Klf1         | Kruppel-like factor 1 (erythroid)               | 1.64  | 0.13 | 1.34  | 0.0206 | 1.22  | 0.0958 | 1.29  | 0.0563 | -1.18  | 0.3486 |
| 100453_at   | 1448676_at   | Camk2b       | calcium/calmodulin-dependent protein kinas      | 6.05  | 0.3  | 1.35  | 0.2876 | -1.03 | 0.9247 | 2.31  | 0.0044 | 1.54   | 0.0143 |
| 100454_at   | 1416674_at   | Ptpru        | protein tyrosine phosphatase, receptor type,    | 2.48  | 0.01 | 1.03  | 0.8932 | 1.26  | 0.0488 | 1.11  | 0.4738 | 1.11   | 0.5869 |
| 100455_at   | 1416688_at   | Snap91       | synaptosomal-associated protein 91              | -1.8  | 0.21 | -1.35 | 0.4751 | -1.89 | 0.1674 | -1.17 | 0.6882 | 1.06   | 0.9087 |
| 100457_at   | 1448579_at   | Glg1         | golgi apparatus protein 1                       | 1.32  | 0.41 | -1.31 | 0.0987 | -1.96 | 0.0055 | -1.78 | 0.0043 | -1.01  | 0.9379 |
| 100458_at   | 1423173_at   | Napb         | N-ethylmaleimide sensitive fusion protein att   | -2.24 | 0.01 | -1.17 | 0.1929 | 1.02  | 0.8603 | -1.28 | 0.0758 | 1.47   | 0.3121 |
| 100459_at   | 1422630_at   | Rad50        | RAD50 homolog (S. cerevisiae)                   | 1.36  | 0.36 | 1.15  | 0.209  | 1.21  | 0.2709 | 1.22  | 0.1114 | 1.14   | 0.4306 |
| 100460_at   | 1422679_s_at | Sh2bp1       | SH2 domain binding protein 1 (tetratricopept    | 1.73  | 0.05 | -1    | 0.9998 | 1.06  | 0.352  | 1.06  | 0.323  | -1.11  | 0.4477 |
| 100461_at   | 1417720_at   | Polr2j       | polymerase (RNA) II (DNA directed) polypep      | -1.31 | 0.32 | -1.11 | 0.1087 | -1.1  | 0.3768 | 1.01  | 0.875  | 1.02   | 0.924  |
| 100463_at   | 1436170_a_at | Csng         | casein gamma                                    | -1.28 | 0.14 | -1.09 | 0.4178 | 1.08  | 0.4931 | 1     | 0.9789 | 2.88   | 0.317  |
| 100464_at   | 1428468_at   | 3110043O21Ri | RIKEN cDNA 3110043O21 gene                      | -1.19 | 0.06 | 1.11  | 0.4109 | 1.06  | 0.6205 | 1.35  | 0.0476 | 1.09   | 0.4892 |
| 100468_g_at | 1419120_at   | Lyl1         | lymphoblastic leukemia                          | 1.92  | 0.11 | 1.43  | 0.2692 | 1.34  | 0.2486 | 2.08  | 0.0798 | 1.56   | 0.3693 |
| 100469_at   | 1452560_a_at | ---          | ---                                             | 1.28  | 0.3  | 1.06  | 0.5265 | 1.19  | 0.1067 | 1.07  | 0.561  | 1.35   | 0.1158 |

|             |              |               |                                              |       |      |       |        |       |        |       |        |       |        |
|-------------|--------------|---------------|----------------------------------------------|-------|------|-------|--------|-------|--------|-------|--------|-------|--------|
| 100470_at   | 1448342_at   | Mapk10        | mitogen activated protein kinase 10          | -1.82 | 0.12 | -1.18 | 0.5009 | -1.08 | 0.6917 | 1.1   | 0.6068 | 1.53  | 0.0163 |
| 100471_at   | 1455288_at   | 1110036O03Rik | RIKEN cDNA 1110036O03 gene                   | 1.06  | 0.91 | -1.07 | 0.8228 | -1.14 | 0.6904 | -1.04 | 0.9039 | 1.06  | 0.8405 |
| 100472_at   | 1424800_at   | Enah          | enabled homolog (Drosophila)                 | -1    | 0.99 | -1.44 | 0.175  | 1.02  | 0.9415 | -1.02 | 0.9386 | -1.89 | 0.2411 |
| 100473_at   | 1460444_at   | Arrb1         | arrestin, beta 1                             | 3.36  | 0.02 | -1.01 | 0.962  | 1.01  | 0.9284 | 1.18  | 0.3393 | 1.59  | 0.0143 |
| 100474_at   | 1420377_at   | S18sia2       | ST8 alpha-N-acetyl-neuraminide alpha-2,8-s   | -1.13 | 0.54 | 1.01  | 0.9285 | -1.06 | 0.3814 | -1.06 | 0.2171 | 1.26  | 0.3617 |
| 100475_at   | 1425974_a_at | Trim25        | tripartite motif protein 25                  | -1.16 | 0.39 | 1.02  | 0.8321 | 1.15  | 0.1303 | -1.1  | 0.32   | -1.08 | 0.3776 |
| 100476_at   | 1417484_at   | lbsp          | integrin binding sialoprotein                | 1.1   | 0.84 | -1.61 | 0.1419 | -1.3  | 0.3368 | 1.19  | 0.5982 | 1.51  | 0.3359 |
| 100477_at   | 1422587_at   | Tmem45a       | transmembrane protein 45a                    | -1.33 | 0.25 | -1.39 | 0.2951 | -1.01 | 0.979  | -1.1  | 0.7362 | 1.33  | 0.5468 |
| 100481_at   | 1449154_at   | Col11a1       | procollagen, type XI, alpha 1                | 1.37  | 0.59 | 1.05  | 0.9082 | 1.66  | 0.1594 | 1.56  | 0.2675 | 4.62  | 0.039  |
| 100482_at   | 1460691_at   | Zfp598        | zinc finger protein 598                      | -1.41 | 0.2  | 1.06  | 0.3676 | 1.17  | 0.0283 | 1.11  | 0.0488 | -1.05 | 0.5439 |
| 100483_at   | 1449026_at   | lfnar1        | interferon (alpha and beta) receptor 1       | 1.72  | 0.16 | 1.12  | 0.1593 | 1.12  | 0.1023 | 1.19  | 0.042  | -1.13 | 0.4495 |
| 100484_at   | 1417256_at   | Mmp13         | matrix metalloproteinase 13                  | 2.11  | 0.09 | 1.34  | 0.1416 | 1.02  | 0.9091 | 1.43  | 0.035  | 4.15  | 0.034  |
| 100486_at   | 1449023_a_at | Ezh1          | enhancer of zeste homolog 1 (Drosophila)     | 1.02  | 0.95 | 1.1   | 0.2133 | 1.07  | 0.4777 | 1.18  | 0.0399 | 1.41  | 0.0724 |
| 100488_at   | 1450099_a_at | Gba           | glucosidase, beta, acid                      | -1.08 | 0.63 | 1     | 0.997  | 1.09  | 0.1288 | 1.06  | 0.4186 | -1.1  | 0.4345 |
| 100489_at   | 1423313_at   | Pde7a         | phosphodiesterase 7A                         | 2.2   | 0    | 1.89  | 0.0193 | 1.4   | 0.1223 | 2.57  | 0.0001 | 1.15  | 0.7792 |
| 100491_at   | 1418445_at   | ---           | ---                                          | 1.01  | 0.96 | -1.29 | 0.004  | -1.02 | 0.8403 | -1.47 | 0.0002 | -1.8  | 0.0001 |
| 100492_at   | 1455482_at   | Ap2a2         | adaptor protein complex AP-2, alpha 2 subu   | 1.11  | 0.69 | 1.01  | 0.9174 | -1.14 | 0.1194 | -1.2  | 0.0326 | -1.38 | 0.029  |
| 100493_at   | 1416761_at   | ---           | ---                                          | -2.36 | 0.28 | 1.04  | 0.6964 | 1.02  | 0.9014 | -1.04 | 0.6698 | 1.68  | 0.004  |
| 100495_at   | 1417207_at   | Dvl2          | dishevelled 2, dsh homolog (Drosophila)      | -2.22 | 0.2  | 1.21  | 0.3046 | 1.13  | 0.5277 | 1.13  | 0.5171 | -1.05 | 0.8981 |
| 100496_at   | 1418908_at   | Pam           | peptidylglycine alpha-amidating monooxyge    | 1.56  | 0.49 | -1.59 | 0.1563 | -1.77 | 0.0846 | -1.45 | 0.3744 | 1.46  | 0.5168 |
| 100498_g_at | 1426151_a_at | Stx3          | syntaxin 3                                   | 2.77  | 0.12 | 1.69  | 0.1502 | 1     | 0.9902 | 1.41  | 0.3736 | -1.32 | 0.4687 |
| 100499_at   | 1425536_at   | ---           | ---                                          | 1.43  | 0.5  | 1.75  | 0.2506 | 1.39  | 0.3915 | 2.61  | 0.0412 | 1.59  | 0.5289 |
| 100500_at   | 1416888_at   | Fadd          | Fas (TNFRSF6)-associated via death domai     | 1.09  | 0.53 | -1.03 | 0.5903 | 1.02  | 0.7616 | -1.06 | 0.5848 | -1.44 | 0.2672 |
| 100501_at   | 1448911_at   | Atp4b         | ATPase, H+/K+ transporting, beta polypepti   | -1.19 | 0.52 | 1.04  | 0.724  | 1.11  | 0.3905 | 1.25  | 0.275  | 1.41  | 0.3892 |
| 100502_at   | 1426036_a_at | Pde1c         | phosphodiesterase 1C                         | -2.96 | 0.39 | 1.08  | 0.818  | 2.03  | 0.0387 | 1.65  | 0.0766 | 1.42  | 0.3141 |
| 100505_at   | 1448125_at   | Rit2          | Ras-like without CAAX 2                      | -2.17 | 0.43 | -1.43 | 0.16   | -1.06 | 0.807  | -1.02 | 0.9241 | 1.82  | 0.2465 |
| 100507_at   | 1426852_x_at | Nov           | nephroblastoma overexpressed gene            | -3.33 | 0.06 | -1.32 | 0.3074 | -1.74 | 0.0414 | -1.36 | 0.2676 | 1.1   | 0.8063 |
| 100508_at   | 1416992_at   | Mfng          | manic fringe homolog (Drosophila)            | 1.06  | 0.61 | -1.21 | 0.015  | -1.06 | 0.4711 | -1.15 | 0.0937 | 1.04  | 0.7381 |
| 100509_at   | 1417508_at   | Rnf19         | ring finger protein (C3HC4 type) 19          | 1.18  | 0.33 | 1.15  | 0.0676 | 1.42  | 0.0084 | 1.17  | 0.0646 | 1.09  | 0.6143 |
| 100510_at   | 1418053_at   | Snbc          | synuclein, beta                              | -1.31 | 0.11 | -1.24 | 0.0183 | -1.02 | 0.8044 | -1.1  | 0.4221 | -1.05 | 0.7525 |
| 100511_at   | 1428242_at   | 6330406L22Rik | RIKEN cDNA 6330406L22 gene                   | 1.08  | 0.8  | 1     | 0.9562 | -1.12 | 0.1414 | 1.09  | 0.4791 | 1.07  | 0.4682 |
| 100512_at   | 1419452_at   | Uchl5         | ubiquitin carboxyl-terminal esterase L5      | 2.7   | 0.04 | 1.32  | 0.039  | 1.21  | 0.2535 | 1.28  | 0.0296 | -1.02 | 0.8529 |
| 100513_at   | 1425572_a_at | Ddef1         | development and differentiation enhancing    | 1.32  | 0.37 | 1     | 0.9686 | -1.01 | 0.947  | -1.05 | 0.7    | -1.26 | 0.2498 |
| 100514_at   | 1450656_at   | Gna13         | guanine nucleotide binding protein, alpha 13 | -1    | 0.99 | 1.19  | 0.379  | -1.74 | 0.0087 | -1.41 | 0.1056 | 1.27  | 0.0219 |
| 100515_at   | 1418518_at   | Furin         | furin (paired basic amino acid cleaving enzy | -1.47 | 0.01 | 1.08  | 0.2696 | 1.16  | 0.0219 | 1.22  | 0.003  | 1.06  | 0.4641 |
| 100516_at   | 1450264_a_at | Chka          | choline kinase alpha                         | -1.85 | 0.11 | -1.04 | 0.8368 | -1.42 | 0.0271 | 1.04  | 0.7463 | 1.12  | 0.5522 |
| 100521_at   | 1426526_s_at | Ovgp1         | oviductal glycoprotein 1                     | -2.12 | 0.07 | 1.1   | 0.3161 | 1.1   | 0.3065 | 1.14  | 0.1123 | 1.73  | 0.0034 |
| 100523_r_at | 1451230_a_at | Wbp5          | WW domain binding protein 5                  | 1.36  | 0.57 | 1.01  | 0.9758 | -1.02 | 0.954  | 1     | 0.9905 | 1.28  | 0.0294 |
| 100525_at   | 1448115_at   | Htf9c         | Hpall tiny fragments locus 9c                | -1.27 | 0.35 | 1.03  | 0.6948 | -1.02 | 0.8384 | -1.04 | 0.6161 | 1.22  | 0.0811 |
| 100527_at   | 1419812_s_at | D11ErtD99e    | DNA segment, Chr 11, ERATO Doi 99, expr      | 1.12  | 0.37 | 1.05  | 0.2699 | -1.05 | 0.3512 | -1.02 | 0.5818 | 1.05  | 0.7197 |
| 100529_at   | 1418632_at   | Ube2h         | ubiquitin-conjugating enzyme E2H             | 1.17  | 0.62 | -1.25 | 0.0334 | -1.24 | 0.1192 | -1.41 | 0.008  | -1.73 | 0.3347 |
| 100530_at   | 1460634_at   | Ralgds        | ral guanine nucleotide dissociation stimulat | -1.58 | 0.12 | -1.19 | 0.0269 | -1.21 | 0.0265 | -1.16 | 0.0452 | -1.29 | 0.0437 |
| 100534_at   | 1423395_at   | Tsnax         | translin-associated factor X                 | 1.22  | 0.28 | -1.04 | 0.4662 | -1.07 | 0.3596 | -1.04 | 0.5857 | -1.06 | 0.6424 |
| 100535_at   | 1428362_at   | E130105L11Rik | RIKEN cDNA E130105L11 gene                   | 1.59  | 0.18 | 1.04  | 0.5609 | 1.14  | 0.2968 | 1.21  | 0.0283 | -1.01 | 0.9603 |
| 100536_at   | 1433785_at   | Mobp          | myelin-associated oligodendrocytic basic pro | -1.01 | 0.96 | -1.16 | 0.3935 | -1.1  | 0.3349 | -1.12 | 0.3536 | 1.36  | 0.144  |
| 100538_at   | 1451124_at   | Sod1          | superoxide dismutase 1, soluble              | 1.19  | 0.02 | -1.02 | 0.7982 | 1.09  | 0.2349 | 1.03  | 0.6324 | -1.12 | 0.7894 |
| 100539_at   | 1417094_at   | MGI:1917275   | brain acyl-CoA hydrolase                     | 1.97  | 0.12 | 1.06  | 0.3598 | 1.15  | 0.1033 | 1.02  | 0.7929 | 1.05  | 0.8125 |
| 100540_at   | 1434790_a_at | Lta4h         | leukotriene A4 hydrolase                     | 1.52  | 0.24 | -1.07 | 0.3197 | -1.03 | 0.6563 | -1.01 | 0.8816 | -1.37 | 0.0337 |
| 100543_s_at | 1448521_at   | Brd7          | bromodomain containing 7                     | 1.16  | 0.4  | -1.11 | 0.1199 | 1.05  | 0.6749 | -1.04 | 0.5542 | 1     | 0.9852 |
| 100546_at   | 1416920_at   | Rbm4          | RNA binding motif protein 4                  | -1.28 | 0.7  | -1.34 | 0.2516 | 1.15  | 0.6523 | -1.28 | 0.2859 | -2.11 | 0.4681 |
| 100548_at   | 1416406_at   | Pea15         | phosphoprotein enriched in astrocytes 15     | 1.43  | 0.59 | 1.28  | 0.387  | 1.42  | 0.3081 | 1.43  | 0.4022 | 1.06  | 0.7698 |
| 100549_at   | 1448716_at   | Hba-x         | hemoglobin X, alpha-like embryonic chain in  | 1.04  | 0.93 | -1.19 | 0.0448 | -1.16 | 0.1693 | -1.23 | 0.046  | 1.46  | 0.0533 |
| 100550_f_at | 1434491_a_at | ---           | Transcribed locus, strongly similar to NP_44 | 1.13  | 0.2  | 1.21  | 0.022  | 1.02  | 0.7843 | 1.24  | 0.0011 | 1.14  | 0.2218 |

|             |              |               |                                                 |       |      |       |        |       |        |       |        |       |        |
|-------------|--------------|---------------|-------------------------------------------------|-------|------|-------|--------|-------|--------|-------|--------|-------|--------|
| 100552_at   | 1448167_at   | lfngr1        | interferon gamma receptor 1                     | 1.17  | 0.13 | 1.45  | 0.0305 | 1.07  | 0.4094 | 1.6   | 0.0334 | 1.33  | 0.0785 |
| 100553_at   | 1448101_s_at | Trim27        | tripartite motif protein 27                     | -1.48 | 0    | 1.08  | 0.0749 | 1.13  | 0.0357 | 1.08  | 0.1002 | 1.19  | 0.1896 |
| 100554_at   | 1416554_at   | Pdlim1        | PDZ and LIM domain 1 (elfin)                    | 1.13  | 0.38 | -1.49 | 0.0002 | -1.28 | 0.0184 | -1.6  | 0.0001 | -1.59 | 0.0419 |
| 100555_at   | 1416600_a_at | Dscr1         | Down syndrome critical region homolog 1 (h      | -1.11 | 0.45 | 1.02  | 0.9081 | 1.06  | 0.7056 | 1.06  | 0.6536 | 1.04  | 0.8244 |
| 100557_g_at | 1426378_at   | Eif4b         | eukaryotic translation initiation factor 4B     | -1.05 | 0.8  | 1.13  | 0.4001 | 1.15  | 0.2694 | 1.09  | 0.3789 | 1.35  | 0.1433 |
| 100559_at   | 1423925_at   | Dhx16         | DEAH (Asp-Glu-Ala-His) box polypeptide 16       | -1.05 | 0.81 | -1.04 | 0.6308 | 1.05  | 0.6266 | -1.02 | 0.7771 | 1.17  | 0.2308 |
| 100560_at   | 1448578_at   | Pafah1b1      | platelet-activating factor acetylhydrolase, isc | -1.22 | 0.12 | -1.22 | 0.0077 | -1.33 | 0.0118 | -1.3  | 0.0004 | -1.01 | 0.9391 |
| 100561_at   | 1417380_at   | Iqgap1        | IQ motif containing GTPase activating protei    | -1.13 | 0.69 | 1.41  | 0.2282 | -1.24 | 0.113  | 1.51  | 0.1583 | 1.34  | 0.2021 |
| 100562_at   | 1448740_at   | 2400006H24Rik | RIKEN cDNA 2400006H24 gene                      | 2.38  | 0.36 | 1.51  | 0.3293 | 1.12  | 0.7988 | 1.11  | 0.8187 | 1.02  | 0.9368 |
| 100564_at   | 1417103_at   | Ddt           | D-dopachrome tautomerase                        | 1.08  | 0.56 | 1.04  | 0.3643 | 1.15  | 0.0005 | 1.13  | 0.0348 | 1     | 0.9862 |
| 100565_at   | 1448163_at   | ---           | ---                                             | -1.15 | 0.44 | -1.23 | 0.0326 | -1.14 | 0.0668 | -1.54 | 0      | 1.05  | 0.5411 |
| 100566_at   | 1452114_s_at | Igfbp5        | insulin-like growth factor binding protein 5    | 1.7   | 0.16 | -2.56 | 0      | -4.11 | 0      | -2.75 | 0      | 1.68  | 0.1087 |
| 100567_at   | 1451263_a_at | Fabp4         | fatty acid binding protein 4, adipocyte         | 1.29  | 0.47 | -1.19 | 0.265  | -1.06 | 0.6851 | -1.11 | 0.402  | 1.54  | 0.1427 |
| 100568_at   | 1416015_s_at | Abce1         | ATP-binding cassette, sub-family E (OABP),      | -1.28 | 0.15 | -1.11 | 0.0914 | 1.04  | 0.4956 | 1.06  | 0.5208 | -1.26 | 0.0288 |
| 100569_at   | 1419091_a_at | Anxa2         | annexin A2                                      | 1.37  | 0.04 | 1.38  | 0.0898 | 1.04  | 0.7318 | 1.15  | 0.4717 | -1.02 | 0.9634 |
| 100570_at   | 1420535_a_at | 6330412F12Rik | RIKEN cDNA 6330412F12 gene                      | 1.07  | 0.6  | -1.04 | 0.4443 | -1.06 | 0.1357 | 1     | 0.9479 | -1.05 | 0.6239 |
| 100571_at   | 1416148_at   | Laptm4b       | lysosomal-associated protein transmembran       | -1.18 | 0.23 | -1.05 | 0.549  | 1.02  | 0.7835 | -1.12 | 0.1316 | -1.14 | 0.1401 |
| 100574_f_at | 1434814_x_at | Gpi1          | glucose phosphatase isomerase 1                 | 1.05  | 0.68 | 1.04  | 0.5707 | 1.22  | 0.0307 | 1.28  | 0.0031 | 1.23  | 0.1362 |
| 100575_at   | 1417118_a_at | Ard1          | N-acetyltransferase ARD1 homolog (S. cere       | 2.31  | 0.14 | 1.02  | 0.8836 | 1.15  | 0.1899 | 1.06  | 0.5168 | -1.09 | 0.6509 |
| 100576_at   | 1416410_at   | Pafah1b3      | platelet-activating factor acetylhydrolase, isc | 1.24  | 0.3  | 1.81  | 0.0009 | 1.42  | 0.1444 | 1.95  | 0.0001 | 1.56  | 0.0005 |
| 100578_at   | 1415852_at   | Impdh2        | inosine 5'-phosphate dehydrogenase 2            | 1.28  | 0.26 | 1.06  | 0.4026 | 1.03  | 0.7035 | 1.16  | 0.0779 | 1.26  | 0.2031 |
| 100579_s_at | 1434540_a_at | Clta          | clathrin, light polypeptide (Lca)               | 1.68  | 0.04 | 1.04  | 0.3512 | 1.18  | 0.001  | 1.11  | 0.1688 | 1.19  | 0.2362 |
| 100580_at   | 1421062_s_at | Clta          | clathrin, light polypeptide (Lca)               | -3.42 | 0    | -1.17 | 0.6247 | -1.32 | 0.2814 | -1.63 | 0.1145 | -1.09 | 0.7154 |
| 100581_at   | 1422507_at   | Cstb          | cystatin B                                      | 1.13  | 0.35 | 1.33  | 0.0534 | 1.07  | 0.32   | 1.56  | 0.0246 | -1.09 | 0.5452 |
| 100583_at   | 1429381_x_at | Igh-VJ558     | immunoglobulin heavy chain (J558 family)        | 1.88  | 0.09 | 1.84  | 0.0177 | 1.04  | 0.8565 | 1.55  | 0.0222 | 1.85  | 0.1242 |
| 100584_at   | 1421223_a_at | Anxa4         | annexin A4                                      | 1.42  | 0.06 | 1.12  | 0.0879 | 1.01  | 0.8438 | 1.12  | 0.1604 | -1.04 | 0.5924 |
| 100588_at   | 1417189_at   | Psme2         | proteasome (prosome, macropain) 28 subur        | 1.27  | 0.01 | 1.12  | 0.561  | -1.26 | 0.0014 | 1.2   | 0.2615 | -1.09 | 0.3637 |
| 100589_at   | 1433470_a_at | Immt          | inner membrane protein, mitochondrial           | 1.58  | 0.51 | -1.28 | 0.4033 | -1.16 | 0.6515 | 1.22  | 0.5612 | 1.1   | 0.6983 |
| 100592_at   | 1415882_at   | Ghitm         | growth hormone inducible transmembrane p        | -1.03 | 0.88 | 1.1   | 0.2452 | 1.06  | 0.5903 | 1.01  | 0.8733 | -1.13 | 0.5927 |
| 100593_at   | 1424967_x_at | Tnnt2         | troponin T2, cardiac                            | 2.59  | 0.11 | -1.02 | 0.9079 | -1.21 | 0.3224 | 1.06  | 0.7197 | 1.75  | 0.2085 |
| 100594_at   | 1415946_at   | Pigq          | phosphatidylinositol glycan, class Q            | 1.2   | 0.17 | 1.02  | 0.6854 | -1.01 | 0.8936 | -1.03 | 0.5836 | -1.38 | 0.0065 |
| 100595_at   | 1460707_at   | Ptp4a2        | protein tyrosine phosphatase 4a2                | -1.01 | 0.94 | 1.23  | 0.0014 | 1.06  | 0.0839 | 1.28  | 0.0001 | -1.19 | 0.0554 |
| 100596_at   | 1450699_at   | Selenbp1      | selenium binding protein 1                      | 1.11  | 0.48 | 1.2   | 0.0008 | 1.1   | 0.1549 | 1.44  | 0      | -1.06 | 0.7182 |
| 100597_at   | 1448429_at   | Gyg1          | glycogenin 1                                    | 1.76  | 0.15 | 1.19  | 0.3503 | 1.16  | 0.1717 | 1.23  | 0.1707 | 1.07  | 0.8855 |
| 100599_at   | 1448135_at   | Atf4          | activating transcription factor 4               | -1.2  | 0.12 | 1.07  | 0.434  | 1.14  | 0.1107 | 1.13  | 0.1212 | 1.14  | 0.5605 |
| 100600_at   | 1448182_a_at | Cd24a         | CD24a antigen                                   | 1.03  | 0.84 | -1.1  | 0.4568 | 1.01  | 0.9076 | -1.03 | 0.7861 | 1.68  | 0.002  |
| 100601_at   | 1417534_at   | ---           | ---                                             | 1.39  | 0.21 | -1.08 | 0.1447 | -1.15 | 0.025  | -1.12 | 0.0473 | -1.27 | 0.2339 |
| 100603_at   | 1415841_at   | Dncic2        | dynein, cytoplasmic, intermediate chain 2       | 2.22  | 0.01 | 1.25  | 0.0579 | 1.11  | 0.4259 | 1.32  | 0.0004 | -1.39 | 0.1418 |
| 100605_at   | 1419739_at   | Tpm2          | tropomyosin 2, beta                             | 2.01  | 0.21 | -2.46 | 0.159  | -1.91 | 0.2627 | -2.06 | 0.2234 | 1.3   | 0.0129 |
| 100606_at   | 1448233_at   | Prnp          | prion protein                                   | 1.01  | 0.99 | 1.2   | 0.1391 | -1.26 | 0.148  | 1.2   | 0.2163 | -1.28 | 0.1687 |
| 100607_at   | 1416013_at   | Pld3          | phospholipase D3                                | 1.35  | 0.37 | -1.03 | 0.6192 | -1.03 | 0.7817 | -1.07 | 0.539  | -1.18 | 0.7352 |
| 100610_at   | 1426400_a_at | Capns1        | calpain, small subunit 1                        | 1.45  | 0.14 | 1.05  | 0.5723 | 1.08  | 0.3751 | 1.16  | 0.1416 | -1.2  | 0.0189 |
| 100611_at   | 1423547_at   | Lyzs          | lysozyme                                        | 2.05  | 0.08 | 2.31  | 0.2514 | -1.04 | 0.8434 | 4.14  | 0.1337 | -1.05 | 0.6837 |
| 100612_at   | 1415878_at   | Rrm1          | ribonucleotide reductase M1                     | 1.28  | 0.55 | 2.23  | 0.0951 | 1.4   | 0.1755 | 2.53  | 0.0146 | 1.8   | 0.0791 |
| 100613_at   | 1416113_at   | Fkbp8         | FK506 binding protein 8                         | -1.31 | 0.4  | -1.16 | 0.0177 | -1.19 | 0.1258 | -1.26 | 0.0278 | -1.35 | 0.3023 |
| 100614_at   | 1451203_at   | Mb            | myoglobin                                       | 1.4   | 0.22 | -6.61 | 0.1724 | -4.94 | 0.2006 | -10   | 0.149  | -2.03 | 0.2815 |
| 100615_at   | 1422420_at   | Mb            | myoglobin                                       | -2.38 | 0.17 | 1.54  | 0.0978 | 1.44  | 0.1336 | 1.1   | 0.6699 | -1.01 | 0.9651 |
| 100617_at   | 1423772_x_at | Slc25a5       | solute carrier family 25 (mitochondrial carri   | -3.87 | 0.06 | 1.14  | 0.6091 | 1.34  | 0.2424 | -1.32 | 0.3137 | 2.28  | 0.1986 |
| 100621_at   | 1451201_s_at | Rnh1          | ribonuclease/angiogenin inhibitor 1             | 1.42  | 0.13 | -1.01 | 0.6892 | -1.07 | 0.1575 | 1.04  | 0.2911 | -1.62 | 0.0066 |
| 100626_at   | 1426040_a_at | Odf2          | outer dense fiber of sperm tails 2              | 1.15  | 0.67 | -1.37 | 0.4087 | -1.37 | 0.326  | -1.13 | 0.7093 | 2.09  | 0.136  |
| 100628_at   | 1448284_a_at | Nadufc1       | NADH dehydrogenase (ubiquinone) 1, subcu        | 1.28  | 0.6  | -1.07 | 0.1079 | 1.06  | 0.1846 | 1.12  | 0.2527 | -1.16 | 0.24   |
| 100629_at   | 1416842_at   | Gstm5         | glutathione S-transferase, mu 5                 | 1.3   | 0.21 | -1.03 | 0.6945 | -1.01 | 0.944  | -1.04 | 0.6139 | 1.33  | 0.0413 |
| 100632_at   | 1417690_at   | Prkag1        | protein kinase, AMP-activated, gamma 1 no       | 1.1   | 0.65 | 3.3   | 0      | 2.25  | 0.0139 | 2.99  | 0      | 2.97  | 0.0304 |

|             |              |                |                                                   |       |      |       |        |       |        |       |        |       |        |
|-------------|--------------|----------------|---------------------------------------------------|-------|------|-------|--------|-------|--------|-------|--------|-------|--------|
| 100633_at   | 1416766_at   | 2810484M10Ri   | RIKEN cDNA 2810484M10 gene                        | 1.84  | 0    | 1.01  | 0.7941 | 1.02  | 0.562  | 1.06  | 0.1989 | 1.4   | 0.0089 |
| 100634_at   | 1448723_at   | Rdh7           | retinol dehydrogenase 7                           | -1.19 | 0.28 | -1.02 | 0.701  | -1.06 | 0.2184 | -1.06 | 0.2868 | -1.01 | 0.8731 |
| 100635_at   | 1415696_at   | Sara1          | SAR1a gene homolog 1 (S. cerevisiae)              | -1.28 | 0.32 | -1.08 | 0.5178 | -1.18 | 0.1304 | -1.16 | 0.1444 | 1.11  | 0.3836 |
| 100636_at   | 1417562_at   | Eif4ebp1       | eukaryotic translation initiation factor 4E bindi | 1.15  | 0.43 | -1.04 | 0.5375 | 1.14  | 0.184  | 1.01  | 0.8613 | 1.63  | 0.0013 |
| 100669_at   | 1426145_at   | ---            | ---                                               | -2.13 | 0.02 | -1    | 0.9944 | 1.25  | 0.3939 | -1.02 | 0.9023 | 1.34  | 0.3962 |
| 100670_at   | 1421660_at   | Scn9a /// LOC2 | sodium channel, voltage-gated, type IX, alpr      | -1    | 0.99 | -1.89 | 0.0809 | -1.23 | 0.5157 | -2.26 | 0.0386 | -1    | 0.9923 |
| 100671_at   | 1422332_at   | Ifna11         | interferon alpha family, gene 11                  | -2.75 | 0.21 | 1.76  | 0.0658 | 1.45  | 0.2319 | 1.02  | 0.9151 | 1.5   | 0.6031 |
| 100673_f_at | 1420789_at   | Klra5          | killer cell lectin-like receptor, subfamily A, m  | -1.8  | 0.01 | -1.17 | 0.1385 | -1.11 | 0.318  | 1.15  | 0.1815 | 1.49  | 0.1297 |
| 100675_at   | 1450300_at   | Gabbr1         | gamma-aminobutyric acid (GABA-C) recept           | -1.44 | 0.6  | -1.15 | 0.6418 | -1.31 | 0.3661 | 1.36  | 0.4676 | 1.7   | 0.3798 |
| 100678_s_at | 1427681_s_at | V2r13 /// V2r3 | vomer nasal 2, receptor, 13 /// vomer nasal       | -2.16 | 0.22 | 1.15  | 0.7157 | -1.11 | 0.7619 | -1.06 | 0.8814 | 2.54  | 0.124  |
| 100679_at   | 1421701_at   | V2r16          | vomer nasal 2, receptor, 16                       | -1.24 | 0.51 | 1.32  | 0.4142 | 1.05  | 0.7554 | 1.26  | 0.2726 | 1.58  | 0.1024 |
| 100680_at   | 1420773_at   | Dub1           | deubiquitinating enzyme 1                         | 1.2   | 0.71 | 1.43  | 0.2966 | -1.19 | 0.2352 | 1.07  | 0.7182 | -1.31 | 0.4055 |
| 100683_r_at | 1451951_at   | Igk-V8         | immunoglobulin kappa chain variable 8 (V8)        | -3.35 | 0.01 | 1.1   | 0.668  | 1.75  | 0.1872 | 1.52  | 0.1069 | 1.31  | 0.4264 |
| 100684_at   | 1416339_a_at | PrkcsH         | protein kinase C substrate 80K-H                  | 1.31  | 0.29 | -1.03 | 0.4359 | -1.02 | 0.8617 | -1.02 | 0.6514 | -1.1  | 0.1309 |
| 100685_at   | 1422481_at   | Krt2-1         | keratin complex 2, basic, gene 1                  | -2.35 | 0.3  | -1.36 | 0.3564 | -1.92 | 0.0672 | -1.73 | 0.1476 | 2.07  | 0.1951 |
| 100686_at   | 1431766_x_at | Rps2           | ribosomal protein S2                              | 1.06  | 0.69 | 1.04  | 0.3825 | -1.02 | 0.7975 | 1.03  | 0.5487 | 1.27  | 0.0292 |
| 100688_at   | 1420536_at   | Crybb2         | crystallin, beta B2                               | -1.82 | 0.26 | -1.28 | 0.1471 | 1.04  | 0.7891 | -1.14 | 0.3815 | 1.29  | 0.2864 |
| 100690_at   | 1420546_at   | Th             | tyrosine hydroxylase                              | -1.89 | 0.01 | -1.26 | 0.4516 | -1.42 | 0.3558 | 1.02  | 0.9443 | -1.02 | 0.9312 |
| 100691_at   | 1421705_at   | Scn3a          | sodium channel, voltage-gated, type III, alph     | -3.08 | 0.24 | -1.16 | 0.3164 | -1.33 | 0.0597 | -1.05 | 0.8761 | -1.32 | 0.5193 |
| 100692_at   | 1427824_at   | ---            | ---                                               | -1.52 | 0.21 | 1.19  | 0.229  | 1.14  | 0.0584 | 1.02  | 0.8617 | 2.06  | 0.252  |
| 100693_at   | 1422187_at   | Gabrg3         | gamma-aminobutyric acid (GABA-A) recept           | -1.3  | 0.45 | 1.08  | 0.5997 | 1.44  | 0.0081 | 1.15  | 0.4143 | 1.34  | 0.0962 |
| 100694_at   | 1416277_a_at | Rplp1          | ribosomal protein, large, P1                      | -1.3  | 0.32 | -1.08 | 0.1019 | 1.06  | 0.3178 | 1.05  | 0.5331 | 1.33  | 0.1894 |
| 100695_at   | 1449161_at   | Edn2           | endothelin 2                                      | -1.08 | 0.74 | 1.05  | 0.6784 | 1.23  | 0.1439 | 1.15  | 0.3028 | 1.16  | 0.5351 |
| 100696_at   | 1450415_at   | Pde6a          | phosphodiesterase 6A, cGMP-specific, rod,         | -1.18 | 0.57 | -1.33 | 0.0306 | -1.11 | 0.317  | -1.17 | 0.238  | 1.45  | 0.1323 |
| 100697_at   | 1420389_at   | Pax3           | paired box gene 3                                 | -1.47 | 0.18 | 1.81  | 0.0389 | 1.61  | 0.1318 | 1.55  | 0.2447 | 1.13  | 0.2793 |
| 100698_at   | 1450361_at   | Prop1          | paired like homeodomain factor 1                  | -1.75 | 0.04 | 1.31  | 0.1317 | 1.17  | 0.3732 | 1.05  | 0.7828 | 1.13  | 0.661  |
| 100699_at   | 1451781_at   | Nfatc2ip       | nuclear factor of activated T-cells, cytoplasm    | 1.35  | 0.29 | 1.05  | 0.8171 | 1.19  | 0.5078 | -1.13 | 0.5795 | 1.84  | 0.2016 |
| 100702_at   | 1421602_at   | Shbg           | sex hormone binding globulin                      | -2    | 0.1  | -1.17 | 0.1437 | -1.02 | 0.7397 | -1.19 | 0.0235 | 1.37  | 0.1015 |
| 100703_at   | 1417489_at   | Npy2r          | neuropeptide Y receptor Y2                        | 1.04  | 0.91 | -1.07 | 0.7569 | -1.04 | 0.8595 | 1.13  | 0.5038 | 1.17  | 0.4844 |
| 100705_at   | 1450192_at   | Lhcgr          | luteinizing hormone/choriogonadotropin rece       | -1.31 | 0.39 | 1.08  | 0.537  | -1.07 | 0.6465 | -1.09 | 0.4961 | 1.53  | 0.0921 |
| 100706_f_at | 1434353_at   | Sfmbt2         | Scm-like with four mbt domains 2                  | -1.06 | 0.89 | -2.12 | 0.027  | -1.34 | 0.3612 | -1.86 | 0.0589 | 1.8   | 0.2421 |
| 100707_at   | 1421270_at   | Sh3md2         | SH3 multiple domains 2                            | 1.21  | 0.44 | -1.32 | 0.1446 | -1.03 | 0.8368 | -1.15 | 0.3718 | 2.37  | 0.0758 |
| 100708_at   | 1420376_a_at | H3f3b          | H3 histone, family 3B                             | -1.13 | 0.42 | 1.01  | 0.8952 | -1.31 | 0.0005 | -1.03 | 0.653  | -1.14 | 0.2687 |
| 100709_at   | 1415808_at   | Tpbpa          | trophoblast specific protein alpha                | 1.47  | 0.47 | 1.8   | 0.327  | 2.3   | 0.1211 | 1.15  | 0.648  | 1.13  | 0.5625 |
| 100711_at   | 1431177_a_at | Rpl10a         | ribosomal protein L10A                            | 1.41  | 0.28 | 1.07  | 0.1779 | 1.17  | 0.0185 | 1.24  | 0.0031 | 1.2   | 0.2715 |
| 100712_at   | 1420801_at   | Npas1          | neuronal PAS domain protein 1                     | -1.06 | 0.82 | -1.52 | 0.0686 | -2.75 | 0.0006 | -1.54 | 0.0977 | 1.86  | 0.0658 |
| 100713_at   | 1449546_a_at | Zfp617         | zinc finger protein 617                           | 1.21  | 0.71 | 1.1   | 0.4074 | -1.08 | 0.4783 | -1.01 | 0.9057 | 1.09  | 0.712  |
| 100714_at   | 1421464_at   | Bapx1          | bagpipe homeobox gene 1 homolog (Drosop           | 1.64  | 0.31 | 1.4   | 0.1809 | -1.01 | 0.9487 | 1.47  | 0.1914 | 1.42  | 0.4906 |
| 100715_at   | 1421687_at   | Msmb           | beta-microseminoprotein                           | -5.81 | 0.12 | -1.09 | 0.8025 | -1.33 | 0.3086 | -1.93 | 0.0179 | 1.28  | 0.6704 |
| 100716_at   | 1420590_at   | Has1           | hyaluronan synthase1                              | 1.35  | 0.33 | -1.5  | 0.0868 | -1.23 | 0.4067 | -1.59 | 0.0672 | 1.14  | 0.5315 |
| 100717_at   | 1460667_at   | U90926         | cDNA sequence U90926                              | -2.82 | 0.04 | -1.31 | 0.0054 | -1.31 | 0.0054 | -1.24 | 0.0125 | 1.08  | 0.5615 |
| 100719_f_at | 1420490_at   | Klk16          | kallikrein 16                                     | 1.46  | 0.42 | -1.69 | 0.1256 | -1.68 | 0.1597 | -1.39 | 0.271  | -1.55 | 0.3354 |
| 100720_at   | 1418883_a_at | Pabpc1         | poly A binding protein, cytoplasmic 1             | -1.11 | 0.75 | 1.11  | 0.2507 | 1.02  | 0.8672 | 1.18  | 0.0625 | 1.18  | 0.1048 |
| 100722_r_at | 1450367_at   | LOC56304       | recombinant antineuraminidase single chain        | -2.53 | 0.08 | -1.31 | 0.55   | -1.42 | 0.4475 | -1.33 | 0.5637 | 1.17  | 0.626  |
| 100724_at   | 1427587_at   | Zfp28          | zinc finger protein 28                            | 1.32  | 0.56 | 1.29  | 0.4516 | 1.15  | 0.6283 | 1.16  | 0.6314 | 1.34  | 0.523  |
| 100726_at   | 1421616_at   | Grin2a         | glutamate receptor, ionotropic, NMDA2A (ep        | -5.01 | 0.15 | 1.31  | 0.273  | 1.27  | 0.2151 | -1.11 | 0.4344 | 1.71  | 0.2443 |
| 100727_at   | 1416074_a_at | Rpl28          | ribosomal protein L28                             | 1.12  | 0.61 | 1.07  | 0.2737 | 1.23  | 0.0049 | 1.13  | 0.0383 | 1.54  | 0.0009 |
| 100728_at   | 1418663_at   | Mpdz           | multiple PDZ domain protein                       | -1.03 | 0.93 | 1.93  | 0.0035 | 1.94  | 0.0402 | 1.81  | 0.0202 | 1.14  | 0.3728 |
| 100729_at   | 1448109_a_at | Rpl26          | ribosomal protein L26                             | 1.21  | 0.28 | 1.05  | 0.4523 | 1.2   | 0.0812 | 1.21  | 0.0083 | 1.51  | 0.0112 |
| 100730_at   | 1421547_at   | Ly78           | lymphocyte antigen 78                             | 1.03  | 0.88 | -1.17 | 0.3217 | -1.38 | 0.1223 | -1.07 | 0.6808 | 1.44  | 0.0456 |
| 100731_at   | 1450373_at   | Prp15          | proline-rich protein 15                           | 1.04  | 0.94 | 1.48  | 0.2274 | 1.81  | 0.0979 | 2.47  | 0.0001 | -1.07 | 0.8967 |
| 100732_at   | 1436760_a_at | Rps8           | ribosomal protein S8                              | 1.33  | 0.21 | 1.01  | 0.7298 | 1.11  | 0.1057 | 1.12  | 0.0497 | 1.33  | 0.0858 |
| 100733_at   | 1448206_at   | Psma2          | proteasome (prosome, macropain) subunit, ;        | 1.15  | 0.63 | 1.19  | 0.0037 | 1.18  | 0.0595 | 1.29  | 0.0005 | -1.16 | 0.0738 |

|             |              |               |                                                       |       |      |       |        |       |        |       |        |       |        |
|-------------|--------------|---------------|-------------------------------------------------------|-------|------|-------|--------|-------|--------|-------|--------|-------|--------|
| 100734_at   | 1449323_a_at | Rpl3          | ribosomal protein L3                                  | 1.2   | 0.31 | 1.21  | 0.001  | 1.16  | 0.0005 | 1.23  | 0.0001 | 1.43  | 0.0187 |
| 100735_at   | 1427842_at   | Krtap6-3      | keratin associated protein 6-3                        | 1.08  | 0.86 | 1.37  | 0.1877 | 1.22  | 0.3729 | 1.67  | 0.3275 | 1.69  | 0.1432 |
| 100736_at   | 1421761_a_at | Barx2         | BarH-like homeobox 2                                  | -1.14 | 0.46 | -1.43 | 0.2449 | -1.2  | 0.5122 | -1.57 | 0.1191 | -1.03 | 0.9044 |
| 100737_at   | 1450252_at   | Onecut1       | one cut domain, family member 1                       | -2.14 | 0    | -3.02 | 0.0002 | -2.09 | 0.0015 | -3.34 | 0.0001 | -1.1  | 0.8189 |
| 100738_at   | 1426149_at   | Spi15         | serine protease inhibitor 15                          | -2.14 | 0.18 | -1.27 | 0.5487 | -1.08 | 0.8334 | -1.02 | 0.9694 | -1.6  | 0.2968 |
| 100739_at   | 1427834_at   | Spi16         | serine protease inhibitor 16                          | -1.87 | 0.18 | -1.16 | 0.51   | -1.19 | 0.5404 | -1.36 | 0.1478 | 1.67  | 0.2943 |
| 100740_at   | 1422817_at   | Gp5           | glycoprotein 5 (platelet)                             | 1.37  | 0.26 | -1.85 | 0.0913 | -1.01 | 0.9911 | -1.74 | 0.1092 | 1.2   | 0.4739 |
| 100741_at   | 1421661_at   | Fpr11         | formyl peptide receptor-like 1                        | 1.31  | 0.61 | 1.09  | 0.6928 | -1.11 | 0.6953 | -1.04 | 0.8839 | 1.19  | 0.5165 |
| 100742_at   | 1420161_at   | AA409749      | expressed sequence AA409749                           | -1.08 | 0.89 | 1.2   | 0.3963 | 1.07  | 0.7705 | 1.37  | 0.2472 | 1.54  | 0.4031 |
| 100744_at   | 1441134_at   | 6820424L24Rik | RIKEN cDNA 6820424L24 gene                            | -1.05 | 0.92 | 1.09  | 0.5154 | 1.3   | 0.0165 | 1.08  | 0.6285 | 1.11  | 0.8176 |
| 100746_at   | 1457594_at   | ---           | ---                                                   | -1.74 | 0.44 | -1.2  | 0.545  | -1.64 | 0.0818 | -1.24 | 0.3839 | 3.08  | 0.1842 |
| 100747_at   | 1420155_at   | AA408954      | expressed sequence AA408954                           | -2.24 | 0.09 | -1.19 | 0.422  | -1.18 | 0.3753 | -1.18 | 0.3537 | 1.31  | 0.2101 |
| 100748_at   | 1446971_at   | D10Wsu159e    | DNA segment, Chr 10, Wayne State University           | -1.01 | 0.98 | -1.58 | 0.248  | -1.21 | 0.6027 | -1.97 | 0.1083 | 1.4   | 0.6053 |
| 100749_at   | 1457810_at   | Zbtb37        | zinc finger and BTB domain containing 37              | -1.18 | 0.47 | -1.14 | 0.099  | -1.08 | 0.3355 | -1.06 | 0.4108 | 1.22  | 0.3424 |
| 100750_at   | 1420301_at   | AA414903      | expressed sequence AA414903                           | -1.79 | 0.31 | 1.01  | 0.9501 | 1.07  | 0.7729 | 1.16  | 0.4407 | 1.35  | 0.3071 |
| 100751_at   | 1450104_at   | Adam10        | a disintegrin and metalloprotease domain 10           | -1.16 | 0.63 | 1.15  | 0.1235 | -1.16 | 0.3927 | -1.08 | 0.6091 | 1.24  | 0.489  |
| 100752_at   | 1450280_a_at | Rrh           | retinal pigment epithelium derived rhodopsin          | 1.06  | 0.28 | 1.55  | 0.1171 | -1.02 | 0.945  | 1.43  | 0.3669 | 1.25  | 0.455  |
| 100753_at   | 1449710_s_at | Atp5a1        | ATP synthase, H+ transporting, mitochondrial          | 1.22  | 0.15 | 1.1   | 0.019  | 1.08  | 0.1257 | 1.18  | 0.0009 | -1.12 | 0.2548 |
| 100755_at   | 1422928_at   | ---           | ---                                                   | -1.79 | 0.06 | -1.19 | 0.208  | -1.07 | 0.6102 | -1.44 | 0.0242 | -1.08 | 0.6028 |
| 100756_r_at | 1426119_at   | Tyms-ps       | thymidylate synthase, pseudogene                      | 1.33  | 0.3  | -1.1  | 0.3937 | -1.03 | 0.8013 | 1.03  | 0.8459 | 2.83  | 0.0137 |
| 100757_at   | 1452476_at   | Cacnb2        | calcium channel, voltage-dependent, beta 2            | -1.13 | 0.75 | -1.17 | 0.2945 | -1.17 | 0.3457 | -1.18 | 0.3343 | 1.51  | 0.1679 |
| 100760_at   | 1421460_at   | Dsc1          | desmocollin 1                                         | 1.49  | 0.2  | -2.09 | 0.1114 | -1.41 | 0.3977 | 1     | 0.9926 | 1.38  | 0.6045 |
| 100761_at   | 1422036_at   | Strn          | striatin, calmodulin binding protein                  | 1.19  | 0.69 | -1    | 0.9883 | -1.13 | 0.7289 | -1.04 | 0.8982 | 1.78  | 0.1814 |
| 100762_at   | 1421414_a_at | Sema6a        | sema domain, transmembrane domain (TM)                | 1.11  | 0.7  | 1.59  | 0.0911 | 1.77  | 0.087  | 1.61  | 0.1583 | -1.13 | 0.7529 |
| 100763_at   | 1442374_at   | D2Erdt127e    | DNA segment, Chr 2, ERATO Doi 127, expressed          | 1.59  | 0.12 | 1.15  | 0.5817 | -1.32 | 0.3653 | 1.31  | 0.23   | 1.38  | 0.5593 |
| 100764_at   | 1417546_at   | Il2rb         | interleukin 2 receptor, beta chain                    | -1.32 | 0.34 | -1.16 | 0.2047 | -1.08 | 0.6926 | 1.1   | 0.4729 | 1.01  | 0.9619 |
| 100765_at   | 1448055_at   | E230011A21Rik | RIKEN cDNA E230011A21 gene                            | -1.51 | 0.31 | -1.69 | 0.0486 | -1.13 | 0.6152 | -1.7  | 0.0518 | -1.72 | 0.2574 |
| 100766_at   | 1421136_at   | Edn3          | endothelin 3                                          | -1.61 | 0.34 | -1.1  | 0.5316 | -1.01 | 0.9284 | -1.04 | 0.733  | 1.65  | 0.1618 |
| 100767_at   | 1458196_at   | ---           | ---                                                   | -2.14 | 0.01 | 1.65  | 0.3004 | 1.66  | 0.1919 | 1.88  | 0.1407 | 1.44  | 0.6178 |
| 100772_g_at | 1451780_at   | Blnk          | B-cell linker                                         | -1.22 | 0.64 | -1.93 | 0.0075 | -1.17 | 0.4617 | -1.61 | 0.0204 | 1.04  | 0.883  |
| 100773_at   | 1425454_a_at | Il12a         | interleukin 12a                                       | -1.46 | 0.1  | -1.04 | 0.7608 | -1.04 | 0.7756 | 1.02  | 0.8858 | -1.16 | 0.7785 |
| 100774_at   | 1428015_at   | D12Wsu118e    | DNA segment, Chr 12, Wayne State University           | -1.13 | 0.46 | -1.17 | 0.1138 | -1.1  | 0.4893 | -1.11 | 0.3042 | 1.41  | 0.3749 |
| 100778_at   | 1450136_at   | Cd38          | CD38 antigen                                          | -1.96 | 0.26 | -1.28 | 0.1288 | -1.24 | 0.1596 | -1.32 | 0.1679 | -1.16 | 0.7986 |
| 100779_at   | 1419530_at   | Il12b         | interleukin 12b                                       | -1.68 | 0.23 | -1.2  | 0.3191 | 1.12  | 0.7121 | -1.09 | 0.7282 | 1.15  | 0.4821 |
| 100780_at   | 1416276_a_at | Rps4x         | ribosomal protein S4, X-linked                        | 1.25  | 0.31 | 1.03  | 0.4709 | 1.1   | 0.066  | 1.1   | 0.1601 | 1.48  | 0.0207 |
| 100828_at   | 1457126_at   | Myl4          | myosin, light polypeptide 4                           | -1.19 | 0.19 | -1.28 | 0.0098 | -1.15 | 0.097  | -1.24 | 0.0075 | -1.12 | 0.6425 |
| 100876_at   | 1454674_at   | Fez1          | fasciculation and elongation protein zeta 1 (zeta 1)  | 1.28  | 0.33 | 1.24  | 0.0744 | 1.14  | 0.3254 | 1.27  | 0.1165 | -1.33 | 0.299  |
| 100877_at   | 1436339_at   | 1810058I24Rik | RIKEN cDNA 1810058I24 gene                            | 1.36  | 0.19 | -1.03 | 0.6786 | 1.1   | 0.1987 | -1.04 | 0.5297 | -1.11 | 0.4373 |
| 100878_at   | 1423535_at   | Strn3         | striatin, calmodulin binding protein 3                | 1.4   | 0.13 | 1.82  | 0      | 1.54  | 0.0128 | 1.76  | 0      | 1.42  | 0.0653 |
| 100879_at   | 1418677_at   | Actn3         | actinin alpha 3                                       | -1.2  | 0.67 | 1.15  | 0.3477 | 1.18  | 0.3357 | 1.16  | 0.2546 | 1.07  | 0.7473 |
| 100880_at   | 1434380_at   | ---           | Diabetic nephropathy-like protein (Dnr12) member 1    | -2.14 | 0.09 | 1.15  | 0.793  | -1.81 | 0.0192 | 1.35  | 0.5889 | -1.21 | 0.4561 |
| 100882_at   | 1419492_s_at | Defb1         | defensin beta 1                                       | 2.62  | 0    | 2.82  | 0.0114 | 1.43  | 0.0601 | 4.61  | 0.0007 | 2.93  | 0.0062 |
| 100884_at   | 1448894_at   | Akr1b8        | aldo-keto reductase family 1, member B8               | 1.19  | 0.42 | -1.25 | 0.0097 | -1.16 | 0.2832 | -1.19 | 0.2185 | 1.41  | 0.0033 |
| 100885_at   | 1417299_at   | Nek2          | NIMA (never in mitosis gene a)-related expressed      | -1.24 | 0.43 | 1.05  | 0.605  | 1.08  | 0.3747 | -1    | 1      | 1.02  | 0.8763 |
| 100888_at   | 1460390_at   | Sor11         | sortilin-related receptor, LDLR class A repeat        | 1.15  | 0.72 | -1.01 | 0.9828 | -1.15 | 0.4324 | 1.08  | 0.7868 | 1.17  | 0.5006 |
| 100889_at   | 1460034_at   | BC042901      | cDNA sequence BC042901                                | -1.19 | 0.41 | -1.12 | 0.2525 | -1    | 0.9807 | 1     | 0.9847 | 1.16  | 0.1259 |
| 100890_at   | 1423877_at   | Chaf1b        | chromatin assembly factor 1, subunit B (p60)          | -1.04 | 0.79 | 1.65  | 0.045  | 1.7   | 0.0296 | 1.96  | 0.0019 | 1.19  | 0.4881 |
| 100891_at   | 1418358_at   | Mcsp          | mitochondrial capsule selenoprotein                   | 1.36  | 0.49 | 1.15  | 0.4617 | 1.09  | 0.6353 | -1.11 | 0.5525 | -1.1  | 0.7516 |
| 100892_at   | 1423711_at   | Ndutf1        | NADH dehydrogenase (ubiquinone) 1 alpha subunit       | 1.09  | 0.5  | -1.07 | 0.1448 | -1.04 | 0.6107 | -1.11 | 0.0915 | -1.4  | 0.0057 |
| 100893_at   | 1460243_at   | Sptlc2        | serine palmitoyltransferase, long chain base          | 1.94  | 0.03 | 1.08  | 0.2936 | -1.04 | 0.6974 | 1.19  | 0.0647 | 1.59  | 0.0049 |
| 100894_at   | 1415830_at   | Orc5l         | origin recognition complex, subunit 5-like (S. pombe) | 1.19  | 0.28 | 1.01  | 0.8417 | 1.11  | 0.0989 | 1.03  | 0.6249 | -1.09 | 0.3581 |
| 100895_at   | 1437630_at   | D16Bwg1547e   | DNA segment, Chr 16, Brigham & Women's Hospital       | -1.24 | 0.27 | 1.01  | 0.799  | 1.04  | 0.5098 | 1.1   | 0.0703 | -1.46 | 0.0035 |
| 100896_at   | 1422813_at   | ---           | ---                                                   | 1.46  | 0.41 | -2.05 | 0.1822 | -1.09 | 0.851  | -2.35 | 0.1285 | 1.45  | 0.397  |



|             |              |               |                                                 |       |      |       |        |       |        |       |        |       |        |
|-------------|--------------|---------------|-------------------------------------------------|-------|------|-------|--------|-------|--------|-------|--------|-------|--------|
| 100899_s_at | 1448705_at   | Zfp297        | zinc finger protein 297                         | 1.05  | 0.42 | 1.07  | 0.14   | 1     | 0.9357 | 1.07  | 0.279  | 1.15  | 0.1251 |
| 100900_at   | 1433736_at   | Hcfc1         | host cell factor C1                             | -1.1  | 0.14 | 1.18  | 0.0089 | 1.11  | 0.0153 | 1.19  | 0.0043 | 1.22  | 0.009  |
| 100901_at   | 1450439_at   | Hcfc1         | host cell factor C1                             | 1.16  | 0.64 | 1.43  | 0.1172 | 1.37  | 0.3664 | 1.21  | 0.4219 | 1.49  | 0.0861 |
| 100902_at   | 1428357_at   | 2610019F03Rik | RIKEN cDNA 2610019F03 gene                      | 1.08  | 0.74 | -1.61 | 0.0113 | 1.07  | 0.5673 | -1.37 | 0.0809 | -1.24 | 0.1013 |
| 100903_at   | 1417800_at   | Parp2         | poly (ADP-ribose) polymerase family, memb       | -1.04 | 0.91 | 1.06  | 0.2304 | 1.01  | 0.9387 | 1.09  | 0.1372 | 1.18  | 0.3407 |
| 100904_at   | 1452699_at   | LOC386486     | similar to FLJ20859 protein; false p73 target   | -1.34 | 0.05 | 1.04  | 0.5653 | -1.01 | 0.9186 | 1.03  | 0.606  | 1.23  | 0.043  |
| 100905_at   | 1427032_at   | Herc4         | hect domain and RLD 4                           | -1.1  | 0.75 | 1.21  | 0.1122 | 1.05  | 0.7078 | 1.33  | 0.0086 | -1.48 | 0.0821 |
| 100906_at   | 1418741_at   | Itgb7         | integrin beta 7                                 | -1.06 | 0.79 | 1.04  | 0.6257 | -1.08 | 0.3717 | 1.24  | 0.0967 | 1.04  | 0.7612 |
| 100907_at   | 1416640_at   | Kcne1l        | potassium voltage-gated channel, Isk-relate     | -1.58 | 0.31 | 1.09  | 0.3468 | 1.12  | 0.218  | 1.07  | 0.4261 | 1.16  | 0.4808 |
| 100910_at   | 1433609_s_at | ---           | ---                                             | 1.35  | 0    | 1.13  | 0.3718 | 1.07  | 0.6488 | 1.13  | 0.2457 | 1.76  | 0.0747 |
| 100911_at   | 1448225_at   | Gpaa1         | GPI anchor attachment protein 1                 | 1.04  | 0.95 | 1.22  | 0.1816 | 1.01  | 0.9763 | 1.03  | 0.8695 | -1.49 | 0.4125 |
| 100912_at   | 1452839_at   | 2410012M04Rik | RIKEN cDNA 2410012M04 gene                      | 2.55  | 0.12 | 1.16  | 0.0875 | 1.43  | 0.0854 | 1.32  | 0.0002 | -1.06 | 0.8326 |
| 100913_at   | 1417443_at   | BC026682      | cDNA sequence BC026682                          | 2.37  | 0.04 | -1.03 | 0.9176 | 1.11  | 0.7623 | -1.08 | 0.8257 | -1    | 0.9953 |
| 100914_at   | 1437867_at   | LOC385308     | similar to protease                             | -1.93 | 0.04 | -1.08 | 0.6205 | -1.05 | 0.7185 | -1.32 | 0.1109 | -1.13 | 0.74   |
| 100915_at   | 1417472_at   | Myh9          | myosin, heavy polypeptide 9, non-muscle         | -1.26 | 0.32 | -1.13 | 0.4109 | -1.74 | 0.0017 | -1.55 | 0.0117 | -1.29 | 0.0578 |
| 100916_at   | 1418118_at   | Slc22a1       | solute carrier family 22 (organic cation transp | -1.07 | 0.74 | -1.45 | 0      | -1.31 | 0.0018 | -1.9  | 0      | -3.6  | 0.0002 |
| 100921_at   | 1422536_at   | Tnni3         | troponin I, cardiac                             | -2.14 | 0.17 | 1.44  | 0.3218 | 1.36  | 0.3787 | 1.36  | 0.2945 | -2.16 | 0.2021 |
| 100923_at   | 1450650_at   | Myo10         | myosin X                                        | 1.39  | 0.44 | -1.2  | 0.0181 | -1.08 | 0.5956 | -1.36 | 0.0008 | -1.26 | 0.3439 |
| 100924_at   | 1448886_at   | Gata3         | GATA binding protein 3                          | -1.39 | 0.12 | -1.02 | 0.9371 | 1.44  | 0.1523 | -1.24 | 0.417  | 1.43  | 0.262  |
| 100925_at   | 1453208_at   | 2700089E24Rik | RIKEN cDNA 2700089E24 gene                      | -1.4  | 0.24 | 1.01  | 0.9288 | 1.17  | 0.3323 | -1.27 | 0.0898 | -1.63 | 0.0735 |
| 100927_at   | 1456424_s_at | Pltp          | phospholipid transfer protein                   | 1.04  | 0.81 | -1.93 | 0.0004 | -1.17 | 0.3379 | -1.87 | 0.001  | -5.28 | 0.0025 |
| 100928_at   | 1423407_a_at | Fbln2         | fibulin 2                                       | -1.04 | 0.88 | -1    | 0.9973 | -1.13 | 0.35   | -1.02 | 0.8827 | 2.65  | 0.0001 |
| 100929_at   | 1455058_at   | Mtmr9         | myotubularin related protein 9                  | 1.29  | 0.15 | -1.05 | 0.671  | -1.04 | 0.8527 | -1.36 | 0.0023 | -1.18 | 0.3429 |
| 100931_at   | 1460346_at   | Arsa          | arylsulfatase A                                 | -1.08 | 0.63 | 2.84  | 0      | 1.06  | 0.677  | 2.95  | 0      | 1.4   | 0.1511 |
| 100932_at   | 1417228_at   | Capn1         | calpain 1                                       | -1.33 | 0.06 | -2.67 | 0.0031 | -1.7  | 0.0432 | -2.18 | 0.0176 | -1.14 | 0.4647 |
| 100933_at   | 1448366_at   | Stx1a         | syntaxin 1A (brain)                             | 3.97  | 0.01 | -1.43 | 0.26   | 1.02  | 0.9348 | -1.6  | 0.0817 | 2.56  | 0.1376 |
| 100935_at   | 1418437_a_at | Tcf14         | transcription factor-like 4                     | -1.02 | 0.88 | 1.09  | 0.1711 | 1.08  | 0.2686 | 1.06  | 0.3393 | 1.25  | 0.0369 |
| 100939_at   | 1424298_at   | Zfp282        | zinc finger protein 282                         | -1.1  | 0.49 | -1.13 | 0.6991 | -1.12 | 0.7546 | -1.06 | 0.8723 | 1.27  | 0.1494 |
| 100944_at   | 1434372_at   | ---           | ---                                             | 1.14  | 0.5  | 1.27  | 0.5933 | -1.53 | 0.0193 | 1.32  | 0.5197 | -2.93 | 0.0136 |
| 100946_at   | 1452318_a_at | Hspa1b        | heat shock protein 1B                           | 1.11  | 0.86 | 1.47  | 0.1228 | 2.32  | 0.0029 | 2.36  | 0.0116 | 1.64  | 0.0022 |
| 100949_at   | 1417688_at   | BC004044      | cDNA sequence BC004044                          | 1.06  | 0.51 | 1.04  | 0.6976 | 1.04  | 0.6986 | 1.02  | 0.8491 | 1.1   | 0.0435 |
| 100951_at   | 1417753_at   | Pkd2          | polycystic kidney disease 2                     | -1.02 | 0.94 | -1.13 | 0.293  | 1.04  | 0.8279 | -1.01 | 0.9548 | -1.61 | 0.1203 |
| 100953_at   | 1417586_at   | Timeless      | timeless homolog (Drosophila)                   | -1.09 | 0.74 | -1.04 | 0.5557 | 1.02  | 0.7347 | -1.12 | 0.1132 | 1.26  | 0.1452 |
| 100954_at   | 1426923_at   | Hrb           | HIV-1 Rev binding protein                       | -1.01 | 0.98 | 1.17  | 0.1024 | 1.15  | 0.3111 | 1.35  | 0.0065 | 1.2   | 0.1069 |
| 100955_at   | 1422462_at   | 2700084L22Rik | RIKEN cDNA 2700084L22 gene                      | -1.22 | 0.5  | 1.28  | 0.4055 | -1.02 | 0.9297 | 1.53  | 0.0993 | 1.31  | 0.3477 |
| 100957_at   | 1452616_s_at | Ssbp1         | single-stranded DNA binding protein 1           | 1.48  | 0.08 | 1.26  | 0.0046 | 1.09  | 0.5223 | 1.24  | 0.0003 | -1.1  | 0.4671 |
| 100958_at   | 1454656_at   | Spata13       | spermatogenesis associated 13                   | -1.14 | 0.14 | 1.03  | 0.7695 | 1.15  | 0.2585 | -1.04 | 0.6904 | 1.18  | 0.208  |
| 100960_g_at | 1418704_at   | S100a13       | S100 calcium binding protein A13                | -1.02 | 0.83 | 1.03  | 0.5477 | 1.04  | 0.2623 | 1.07  | 0.3197 | 1.34  | 0.0256 |
| 100961_at   | 1449544_a_at | Kcnc2         | potassium voltage-gated channel, subfamily      | -1.26 | 0.09 | 1.76  | 0.0002 | 1.49  | 0.0735 | 1.65  | 0.0124 | 1.33  | 0.3471 |
| 100962_at   | 1417930_at   | Nab2          | Ngfi-A binding protein 2                        | 1.21  | 0.44 | 1.23  | 0.0096 | -1.17 | 0.0732 | 1.29  | 0.0042 | 1.58  | 0.056  |
| 100963_at   | 1451399_at   | MGI:1930773   | brain protein 17                                | 1.5   | 0.23 | 1.34  | 0.0372 | 1.18  | 0.1325 | 1.44  | 0.0015 | 1.32  | 0.1061 |
| 100964_at   | 1449003_a_at | Vti1b         | vesicle transport through interaction with t-S  | 1.42  | 0.21 | -1.04 | 0.4238 | -1.15 | 0.1198 | -1.14 | 0.0294 | -1.1  | 0.4179 |
| 100965_at   | 1455167_at   | Cox8c         | cytochrome c oxidase, subunit VIIIc             | -1.71 | 0    | -1.07 | 0.2402 | -1.06 | 0.3746 | -1.03 | 0.6995 | 1.08  | 0.2655 |
| 100966_at   | 1418680_at   | Serpind1      | serine (or cysteine) proteinase inhibitor, clac | -1.2  | 0.24 | 1.05  | 0.1029 | -1.01 | 0.7675 | 1.05  | 0.0436 | 1.01  | 0.8699 |
| 100967_at   | 1416316_at   | ---           | ---                                             | 1.03  | 0.83 | 1.07  | 0.4964 | 1.06  | 0.2704 | 1.08  | 0.3561 | 1.24  | 0.1845 |
| 100968_at   | 1424723_s_at | Cstf3         | cleavage stimulation factor, 3' pre-RNA, sub    | -1.2  | 0.6  | -1.13 | 0.2674 | -1.14 | 0.2607 | -1.17 | 0.2135 | 1.25  | 0.4691 |
| 100970_at   | 1416657_at   | Akt1          | thymoma viral proto-oncogene 1                  | -1.02 | 0.86 | -1.42 | 0.0006 | -1.37 | 0.0043 | -1.47 | 0.0004 | 1.08  | 0.5993 |
| 100972_s_at | 1430375_a_at | Ccl27         | chemokine (C-C motif) ligand 27                 | 1.34  | 0.01 | -1.06 | 0.6201 | -1.11 | 0.2186 | -1.08 | 0.5484 | 1.73  | 0.0119 |
| 100973_i_at | 1434962_x_at | ---           | ---                                             | 1.36  | 0.01 | 1.04  | 0.7615 | 1     | 0.9834 | 1.04  | 0.6837 | 1.47  | 0.4321 |
| 100974_at   | 1449511_a_at | Ssbp4         | single stranded DNA binding protein 4           | 2.68  | 0.13 | 1.2   | 0.071  | 1.13  | 0.4195 | 1.33  | 0.0123 | -1.38 | 0.4464 |
| 100976_at   | 1451037_at   | ---           | ---                                             | -2.01 | 0.02 | -1.32 | 0.0249 | -1.04 | 0.669  | -1.44 | 0.0056 | 1.12  | 0.5178 |
| 100977_at   | 1423748_at   | Pdk1          | pyruvate dehydrogenase kinase, isoenzyme        | -1.1  | 0.76 | -1.2  | 0.369  | 1.16  | 0.498  | -1.37 | 0.1171 | -1.25 | 0.1033 |
| 100978_at   | 1417253_at   | Frg1          | FSHD region gene 1                              | -1.01 | 0.97 | 1.1   | 0.4137 | 1.17  | 0.2503 | 1.07  | 0.6282 | 1.28  | 0.499  |

|             |              |                  |                                                |       |      |       |        |       |        |       |        |       |        |
|-------------|--------------|------------------|------------------------------------------------|-------|------|-------|--------|-------|--------|-------|--------|-------|--------|
| 100979_at   | 1454064_a_at | Rnf138           | ring finger protein 138                        | -1.11 | 0.74 | 1.35  | 0.0104 | 1.22  | 0.2842 | 1.34  | 0.0191 | -1.04 | 0.7812 |
| 100981_at   | 1450783_at   | lfit1            | interferon-induced protein with tetratricopept | -1.71 | 0.26 | -1.71 | 0.0921 | -2.47 | 0.0106 | -1.88 | 0.0906 | -4.14 | 0.0584 |
| 100982_at   | 1418399_at   | Kctd9            | potassium channel tetramerisation domain c     | 1.27  | 0.37 | -1.04 | 0.8357 | 1.12  | 0.4726 | -1.01 | 0.9504 | 1.03  | 0.8872 |
| 100983_at   | 1422796_at   | Prep             | prolyl endopeptidase                           | 1.65  | 0.12 | -1.03 | 0.8738 | 1.46  | 0.0184 | 1.53  | 0.0011 | -1.11 | 0.7557 |
| 100984_at   | 1417296_at   | Atf1             | activating transcription factor 1              | 1.28  | 0.38 | 1.33  | 0.0019 | 1.07  | 0.5952 | 1.18  | 0.0528 | 1.07  | 0.7716 |
| 100985_at   | 1449733_s_at | Siah1a           | seven in absentia 1A                           | 1.29  | 0.49 | 1.08  | 0.4804 | 1.17  | 0.1499 | 1.1   | 0.4679 | -1.02 | 0.8776 |
| 100986_at   | 1419184_a_at | Fhl2             | four and a half LIM domains 2                  | -1.38 | 0.32 | 1     | 0.995  | -1.13 | 0.4942 | -1.11 | 0.456  | 1.98  | 0.0709 |
| 100988_at   | 1435448_at   | Bcl2l11          | BCL2-like 11 (apoptosis facilitator)           | 2.08  | 0.06 | 1.4   | 0.0256 | 1.49  | 0.0268 | 1.89  | 0.0003 | 1.41  | 0.4814 |
| 100990_g_at | 1422157_a_at | Itgb1bp1         | integrin beta 1 binding protein 1              | 1.75  | 0.14 | -1.01 | 0.9272 | 1.2   | 0.0051 | 1.03  | 0.6433 | 1.03  | 0.8346 |
| 100994_at   | 1416936_at   | Aatk             | apoptosis-associated tyrosine kinase           | -1.23 | 0.26 | -1.13 | 0.2219 | -1.15 | 0.0234 | -1.16 | 0.0197 | 1.18  | 0.7363 |
| 100997_at   | 1426732_at   | Des              | desmin                                         | 1.28  | 0.79 | -1.08 | 0.6645 | 1.02  | 0.9257 | -1.08 | 0.6504 | 2.22  | 0.0835 |
| 100998_at   | 1451721_a_at | H2-Ab1           | histocompatibility 2, class II antigen A, beta | 2.08  | 0.04 | 2.97  | 0.1894 | -1.35 | 0.2435 | 1.96  | 0.2851 | 2.39  | 0.0576 |
| 101000_at   | 1426763_at   | Oaz2             | ornithine decarboxylase antizyme 2             | 1.04  | 0.91 | 1.13  | 0.0846 | -1.03 | 0.7688 | 1     | 0.9696 | -1.05 | 0.6161 |
| 101001_at   | 1423824_at   | 5031439A09Rik    | RIKEN cDNA 5031439A09 gene                     | 2.79  | 0.03 | 1.11  | 0.2334 | 1.2   | 0.0714 | 1.14  | 0.1127 | 1.17  | 0.7876 |
| 101002_at   | 1450714_at   | Oazin            | ornithine decarboxylase antizyme inhibitor     | 1.43  | 0.11 | -1    | 0.9187 | -1.03 | 0.6926 | -1.05 | 0.6764 | 1.04  | 0.7993 |
| 101003_at   | 1416151_at   | Sfrs3            | splicing factor, arginine/serine-rich 3 (SRp2C | -1.08 | 0.73 | -1.15 | 0.412  | -1.21 | 0.2356 | -1.13 | 0.4044 | -1.07 | 0.8561 |
| 101004_f_at | 1434512_x_at | Sfrs3 /// LOC43  | splicing factor, arginine/serine-rich 3 (SRp2C | 1.44  | 0.03 | 1.31  | 0.1126 | -1.06 | 0.6096 | 1.24  | 0.0367 | 1.13  | 0.5231 |
| 101007_at   | 1418300_a_at | Mknk2            | MAP kinase-interacting serine/threonine kin    | 1.51  | 0.05 | 1.16  | 0.106  | 1.12  | 0.3175 | 1.34  | 0.0008 | 1.37  | 0.0379 |
| 101008_at   | 1434434_s_at | Tcerg1           | transcription elongation regulator 1 (CA150)   | -1.15 | 0.63 | 1.24  | 0.0262 | 1.26  | 0.1056 | 1.28  | 0.0961 | -1.05 | 0.8025 |
| 101009_at   | 1435989_x_at | Krt2-8           | keratin complex 2, basic, gene 8               | 1.32  | 0.46 | 1.01  | 0.9001 | -1.09 | 0.3787 | 1.08  | 0.3337 | -1.42 | 0.0768 |
| 101011_at   | 1415867_at   | Cct4             | chaperonin subunit 4 (delta)                   | 1.68  | 0.06 | -1.01 | 0.7613 | 1.14  | 0.3035 | 1.11  | 0.075  | 1.09  | 0.3349 |
| 101013_at   | 1436292_a_at | Oaz1             | ornithine decarboxylase antizyme               | -1.03 | 0.94 | 1.01  | 0.8979 | 1.06  | 0.3518 | -1.03 | 0.3954 | -1.12 | 0.1138 |
| 101014_at   | 1427691_a_at | lfnar2           | interferon (alpha and beta) receptor 2         | -1.2  | 0.5  | 1.75  | 0.0703 | 1.01  | 0.9482 | 1.54  | 0.0399 | 1.22  | 0.4193 |
| 101015_s_at | 1451462_a_at | lfnar2           | interferon (alpha and beta) receptor 2         | 1.39  | 0.11 | 1.46  | 0.0076 | -1.01 | 0.9247 | 1.19  | 0.102  | 1.04  | 0.8735 |
| 101019_at   | 1416382_at   | Ctsc             | cathepsin C                                    | -2.83 | 0.08 | -1.28 | 0.4346 | -1.09 | 0.4235 | -1.18 | 0.6892 | -4.75 | 0.0041 |
| 101023_f_at | 1433936_at   | 0610010E21Rik    | RIKEN cDNA 0610010E21 gene                     | 1.3   | 0.35 | 1.11  | 0.1429 | 1.01  | 0.8293 | 1.1   | 0.053  | 1.01  | 0.9653 |
| 101025_f_at | 1439016_x_at | Sprr2a           | small proline-rich protein 2A                  | -1.34 | 0    | -1.06 | 0.6921 | 1.14  | 0.293  | -1.03 | 0.8254 | 1.03  | 0.8183 |
| 101026_at   | 1419620_at   | Pttg1            | pituitary tumor-transforming 1                 | 1.96  | 0.21 | -1.31 | 0.2691 | -1.51 | 0.1091 | -1.15 | 0.4964 | 1.61  | 0.197  |
| 101029_f_at | 1415927_at   | Actc1            | actin, alpha, cardiac                          | -1.31 | 0.55 | -1.4  | 0.3873 | -2.09 | 0.1123 | -2.1  | 0.1195 | 1.07  | 0.8046 |
| 101030_at   | 1449110_at   | Rhob             | ras homolog gene family, member B              | -1.19 | 0.45 | -1.08 | 0.1402 | 1.19  | 0.0021 | 1.06  | 0.2632 | 1.28  | 0.0195 |
| 101031_at   | 1450561_a_at | Surf1            | surfeit gene 1                                 | 1.45  | 0.02 | 1.04  | 0.5039 | 1.05  | 0.3171 | -1.01 | 0.9193 | 1.19  | 0.0958 |
| 101034_at   | 1418508_a_at | Grb2             | growth factor receptor bound protein 2         | -1.06 | 0.34 | -1.15 | 0.0366 | -1.05 | 0.5408 | -1.26 | 0.0047 | 1.08  | 0.6222 |
| 101035_at   | 1415813_at   | ---              | ---                                            | 1.71  | 0.13 | -1.01 | 0.7907 | 1.1   | 0.1817 | 1.1   | 0.0804 | -1.2  | 0.1098 |
| 101036_at   | 1455357_x_at | Tomm20           | translocase of outer mitochondrial membran     | 1.39  | 0.14 | -1.13 | 0.1369 | -1.14 | 0.1141 | -1.11 | 0.312  | -1.07 | 0.7793 |
| 101039_at   | 1424051_at   | Col4a2           | procollagen, type IV, alpha 2                  | -1.16 | 0.5  | 1.47  | 0.0004 | 1.22  | 0.0014 | 1.7   | 0      | 1.13  | 0.2138 |
| 101040_at   | 1416257_at   | Capn2            | calpain 2                                      | 1.16  | 0.55 | -1.03 | 0.7153 | -1    | 0.9922 | -1.03 | 0.7007 | 1.05  | 0.8111 |
| 101043_f_at | 1415954_at   | Try4 /// Trygn16 | trypsin 4 /// trypsinogen 16 /// RIKEN cDNA    | 1.31  | 0.54 | 1.1   | 0.6233 | 1.24  | 0.145  | 1.17  | 0.4041 | -1.19 | 0.4762 |
| 101044_at   | 1424877_a_at | Alad             | aminolevulinatase, delta-, dehydratase         | 1.62  | 0.03 | -1.09 | 0.1858 | -1.14 | 0.1999 | -1.22 | 0.0059 | 1.07  | 0.6948 |
| 101045_at   | 1448286_at   | Hadh2            | hydroxyacyl-Coenzyme A dehydrogenase ty        | 1.69  | 0.08 | 1.09  | 0.3151 | 1.03  | 0.7211 | 1.56  | 0      | -1.35 | 0.08   |
| 101047_at   | 1453556_x_at | 2410026K10Rik    | RIKEN cDNA 2410026K10 gene                     | 1.18  | 0.57 | 1.46  | 0.0047 | 1.07  | 0.7062 | 1.41  | 0.0786 | -1.08 | 0.7299 |
| 101048_at   | 1422124_a_at | Ptprc            | protein tyrosine phosphatase, receptor type,   | 1.28  | 0.36 | 1.88  | 0.1312 | -1.28 | 0.1401 | 2.53  | 0.194  | 1.16  | 0.7582 |
| 101050_at   | 1415737_at   | Rfk              | riboflavin kinase                              | -1.02 | 0.94 | -1.07 | 0.4281 | -1.01 | 0.911  | -1.09 | 0.361  | -1.14 | 0.4142 |
| 101052_g_at | 1421856_at   | S100a3           | S100 calcium binding protein A3                | -1.16 | 0.75 | -1.31 | 0.45   | -1.38 | 0.394  | -1.79 | 0.1221 | 1.08  | 0.8781 |
| 101053_at   | 1424036_at   | 2610031L17Rik    | RIKEN cDNA 2610031L17 gene                     | -1.22 | 0.38 | -1.09 | 0.163  | 1.01  | 0.8869 | -1.01 | 0.8154 | -1.12 | 0.2814 |
| 101054_at   | 1425519_a_at | li               | la-associated invariant chain                  | 1.35  | 0.45 | 2.38  | 0.1624 | -1.43 | 0.0552 | 2.54  | 0.1286 | 1.89  | 0.0161 |
| 101055_at   | 1448128_at   | Ppgeb            | protective protein for beta-galactosidase      | 1.38  | 0.17 | 1.13  | 0.026  | 1.09  | 0.2032 | 1.16  | 0.0054 | 1.34  | 0.0272 |
| 101056_at   | 1448236_at   | Rdx              | radixin                                        | 1.21  | 0.39 | 1.05  | 0.3717 | 1.04  | 0.6596 | 1.1   | 0.3089 | 1.13  | 0.3022 |
| 101057_at   | 1454682_at   | A430005L14Rik    | RIKEN cDNA A430005L14 gene                     | 1.4   | 0    | 1.13  | 0.1691 | 1.08  | 0.2533 | 1.07  | 0.4211 | 1.18  | 0.1621 |
| 101058_at   | 1417765_a_at | Amy1             | amylase 1, salivary                            | 1.35  | 0.07 | -1.3  | 0.0043 | -1.12 | 0.0973 | -1.27 | 0.0286 | -1.65 | 0.0015 |
| 101059_at   | 1435383_x_at | Ndn              | necdin                                         | 4.37  | 0.01 | 1.35  | 0.2599 | 1.62  | 0.2536 | 1.87  | 0.0664 | 1.16  | 0.5509 |
| 101060_at   | 1423423_at   | Grp58            | glucose regulated protein                      | 1.72  | 0.1  | 1.01  | 0.9599 | -1.45 | 0.0055 | -1.18 | 0.131  | -2.19 | 0.018  |
| 101061_at   | 1449930_a_at | Ssr2             | signal sequence receptor, beta                 | -1.16 | 0.53 | -1.2  | 0.0003 | -1.11 | 0.2002 | -1.27 | 0      | -1.26 | 0.1306 |
| 101062_at   | 1416399_a_at | Hmox2            | heme oxygenase (decycling) 2                   | 1.41  | 0.05 | 1.27  | 0.0249 | 1.29  | 0.0166 | 1.46  | 0.0006 | 1.14  | 0.3611 |

|             |              |                 |                                                 |       |      |       |        |       |        |       |        |        |        |
|-------------|--------------|-----------------|-------------------------------------------------|-------|------|-------|--------|-------|--------|-------|--------|--------|--------|
| 101063_at   | 1418370_at   | Tnnc1           | troponin C, cardiac/slow skeletal               | 2.52  | 0.28 | -2.87 | 0.0134 | -2.79 | 0.0148 | -2.35 | 0.0411 | 1.41   | 0.2144 |
| 101064_at   | 1448282_at   | Plrg1           | pleiotropic regulator 1, PRL1 homolog (Arab     | 1.68  | 0.16 | 1.12  | 0.0458 | 1.22  | 0.0316 | 1.19  | 0.0679 | 1.04   | 0.6226 |
| 101065_at   | 1417947_at   | Pcna            | proliferating cell nuclear antigen              | 1.19  | 0.4  | 1.11  | 0.4326 | -1.13 | 0.1834 | 1.29  | 0.0158 | 1.15   | 0.1467 |
| 101067_at   | 1428709_a_at | Mrpl24          | mitochondrial ribosomal protein L24             | 1.47  | 0.07 | 1.06  | 0.1541 | 1.11  | 0.2913 | 1.16  | 0.0056 | 1.13   | 0.2344 |
| 101069_g_at | 1455504_a_at | Mkrn1           | makorin, ring finger protein, 1                 | 1.57  | 0.2  | -1.06 | 0.5673 | -1.17 | 0.0373 | -1.01 | 0.8781 | -1.04  | 0.7331 |
| 101070_at   | 1418434_at   | Mkrn1           | makorin, ring finger protein, 1                 | 1.22  | 0.23 | 1.01  | 0.962  | -1.12 | 0.4006 | 1.01  | 0.8733 | 1.03   | 0.8387 |
| 101071_at   | 1448826_at   | Myh6            | myosin, heavy polypeptide 6, cardiac muscle     | 1.51  | 0.44 | -1.76 | 0.0662 | -1.67 | 0.1602 | -1.68 | 0.1329 | 1.96   | 0.3453 |
| 101072_at   | 1437733_at   | Eif4ebp2        | Eukaryotic translation initiation factor 4E bin | -1.29 | 0.05 | -1.09 | 0.2456 | 1.06  | 0.1683 | -1.14 | 0.0397 | 1.18   | 0.0281 |
| 101073_at   | 1448655_at   | Lrp1            | low density lipoprotein receptor-related prote  | -1.08 | 0.74 | -1.03 | 0.579  | -1.19 | 0.0858 | -1.09 | 0.1445 | -1.13  | 0.6412 |
| 101075_f_at | 1455802_x_at | Agr2            | anterior gradient 2 (Xenopus laevis)            | -1.6  | 0.18 | 1     | 0.9983 | 2.26  | 0.2757 | 1.09  | 0.5202 | -1.05  | 0.9327 |
| 101077_at   | 1416464_at   | Slc4a1          | solute carrier family 4 (anion exchanger), me   | -1.26 | 0.11 | -1.14 | 0.3051 | -1.26 | 0.1961 | -1.06 | 0.6577 | 1.38   | 0.1407 |
| 101079_at   | 1416791_a_at | Nxf1            | nuclear RNA export factor 1 homolog (S. cere    | 1.53  | 0.22 | 1.42  | 0.0001 | 1.44  | 0      | 1.64  | 0      | 1.13   | 0.5961 |
| 101080_at   | 1416740_at   | Col5a1          | procollagen, type V, alpha 1                    | 2.3   | 0.18 | 2.17  | 0.0002 | 1.27  | 0.4203 | 1.71  | 0.0406 | 2.32   | 0.0707 |
| 101081_at   | 1415702_a_at | Ctbp1           | C-terminal binding protein 1                    | 1.1   | 0.45 | 1.02  | 0.6778 | 1.02  | 0.4342 | 1     | 0.9177 | -1.05  | 0.6668 |
| 101082_at   | 1416632_at   | Mod1            | malic enzyme, supernatant                       | -1.3  | 0.25 | -1.96 | 0.0031 | -1.39 | 0.0907 | -2.2  | 0.0019 | -10.15 | 0      |
| 101085_at   | 1450865_s_at | Mrps24          | mitochondrial ribosomal protein S24             | 1.45  | 0.01 | 1.04  | 0.5884 | 1.13  | 0.059  | 1.12  | 0.0581 | 1.1    | 0.3184 |
| 101086_f_at | 1416244_a_at | Cnbp1           | cellular nucleic acid binding protein 1         | 1.29  | 0.33 | 1.26  | 0.0038 | 1.19  | 0.0398 | 1.25  | 0.0271 | 1.46   | 0.036  |
| 101088_f_at | 1437850_a_at | Cnbp1           | cellular nucleic acid binding protein 1         | 2.08  | 0.02 | 1.2   | 0.0178 | 1.07  | 0.1217 | 1.11  | 0.0761 | 1.04   | 0.8372 |
| 101089_at   | 1449178_at   | Pdlim3          | PDZ and LIM domain 3                            | -1.47 | 0.42 | -1.41 | 0.2643 | -1.73 | 0.1344 | -1.78 | 0.1047 | 1.41   | 0.4617 |
| 101090_at   | 1460208_at   | Fbn1            | fibrillin 1                                     | 1.6   | 0.31 | 1.42  | 0.0466 | 1.02  | 0.9071 | 1.6   | 0.0155 | 1.66   | 0.4723 |
| 101091_at   | 1451005_at   | Sumo1           | SMT3 suppressor of mif two 3 homolog 1 (ye      | 1.76  | 0.04 | -1.05 | 0.5204 | 1     | 0.969  | 1.11  | 0.4049 | 1.16   | 0.4874 |
| 101093_at   | 1452035_at   | Col4a1          | procollagen, type IV, alpha 1                   | -1.16 | 0.64 | 1.87  | 0.0985 | 1.22  | 0.0817 | 2.02  | 0.0127 | 1.11   | 0.6798 |
| 101094_at   | 1416480_a_at | MGI:1930666     | hypoxia induced gene 1                          | 1.47  | 0.08 | -1.06 | 0.564  | -1.19 | 0.1616 | -1.06 | 0.5481 | -1.56  | 0.0012 |
| 101095_at   | 1417359_at   | Mfap2           | microfibrillar-associated protein 2             | -1.94 | 0.26 | -1.34 | 0.008  | -1.16 | 0.1336 | -1.27 | 0.0092 | 2.06   | 0.0857 |
| 101096_s_at | 1426187_a_at | Hs1bp1          | HS1 binding protein                             | -1    | 1    | 1.11  | 0.144  | 1.09  | 0.3624 | 1.08  | 0.2585 | 1.02   | 0.7102 |
| 101097_at   | 1452580_a_at | Mrpl21          | mitochondrial ribosomal protein L21             | 1.52  | 0    | 1.06  | 0.4947 | 1.13  | 0.2889 | 1.11  | 0.2488 | -1.33  | 0.0376 |
| 101099_at   | 1423056_at   | Nsg1            | neuron specific gene family member 1            | -2.09 | 0.25 | -1.05 | 0.7689 | 1.1   | 0.5809 | 1.1   | 0.5029 | -1.13  | 0.761  |
| 101102_at   | 1460737_at   | Igbbp1          | immunoglobulin (CD79A) binding protein 1        | 1.66  | 0.15 | -1.04 | 0.5721 | 1.08  | 0.331  | 1.15  | 0.1485 | 1.12   | 0.1623 |
| 101103_at   | 1423257_at   | ---             | ---                                             | 1.87  | 0.05 | 11.87 | 0.0004 | 20.24 | 0      | 14.95 | 0.0015 | 6.79   | 0.0001 |
| 101104_at   | 1415745_a_at | Dscr3           | Down syndrome critical region gene 3            | -1.03 | 0.8  | 1.19  | 0.0006 | 1.22  | 0.0017 | 1.23  | 0.0006 | 1.15   | 0.2465 |
| 101105_at   | 1421082_s_at | Banf1           | barrier to autointegration factor 1             | 1.03  | 0.89 | -1.01 | 0.7784 | 1.11  | 0.1053 | 1.08  | 0.28   | 1.01   | 0.9663 |
| 101106_at   | 1423758_at   | E430034L04Rik   | RIKEN cDNA E430034L04 gene                      | 1.11  | 0.61 | -1.27 | 0.0426 | -1.32 | 0.0262 | -1.31 | 0.0167 | -1.92  | 0.01   |
| 101107_at   | 1415870_at   | ---             | ---                                             | 1.27  | 0.24 | 1     | 0.9548 | 1.13  | 0.0244 | 1.01  | 0.9139 | -1.03  | 0.5574 |
| 101108_at   | 1416042_s_at | Nasp            | nuclear autoantigenic sperm protein (histone    | 5.09  | 0.01 | 1.7   | 0.0247 | 1.44  | 0.05   | 1.62  | 0.0149 | -1.02  | 0.9521 |
| 101109_at   | 1426778_at   | Dag1            | dystroglycan 1                                  | 1     | 0.97 | 1.05  | 0.1749 | -1.05 | 0.1746 | 1.06  | 0.1737 | 1.06   | 0.6765 |
| 101110_at   | 1424131_at   | Col6a3          | procollagen, type VI, alpha 3                   | 1.07  | 0.52 | -1.18 | 0.2886 | -1.51 | 0.0138 | -1.04 | 0.7965 | 1.11   | 0.5118 |
| 101112_g_at | 1437628_s_at | Rhoa            | ras homolog gene family, member A               | 1.22  | 0.24 | 1.1   | 0.1222 | -1.06 | 0.2556 | 1.01  | 0.7922 | -1.12  | 0.2283 |
| 101114_at   | 1421012_at   | Srprb           | signal recognition particle receptor, B subun   | 1.84  | 0.38 | 1.21  | 0.5022 | 1.45  | 0.147  | -1.11 | 0.7208 | -1.04  | 0.9099 |
| 101115_at   | 1450009_at   | Ltf             | lactotransferrin                                | -2.51 | 0.31 | -1.28 | 0.3555 | 1.04  | 0.8562 | 1.32  | 0.3021 | 1.3    | 0.4343 |
| 101116_at   | 1420109_at   | Pip5k2a         | Phosphatidylinositol-4-phosphate 5-kinase, 1    | -1.33 | 0.46 | 1.25  | 0.2746 | 1.25  | 0.1419 | 1.18  | 0.408  | 1.89   | 0.1014 |
| 101117_at   | 1420163_at   | AA511261        | expressed sequence AA511261                     | 1.01  | 0.96 | -1.62 | 0.0621 | -1.47 | 0.133  | -1.67 | 0.058  | 1.32   | 0.41   |
| 101119_at   | 1449781_at   | ---             | ---                                             | -2.33 | 0.15 | 1.12  | 0.7145 | -1.03 | 0.9135 | 1.05  | 0.8516 | 1.49   | 0.2481 |
| 101121_at   | 1420236_at   | Hat1            | Histone aminotransferase 1                      | -1.78 | 0.33 | 1.07  | 0.6449 | 1.01  | 0.9198 | -1.1  | 0.3048 | -1.56  | 0.3852 |
| 101122_at   | 1421527_at   | Epha6           | Eph receptor A6                                 | -2.27 | 0.12 | -1.2  | 0.4255 | 1.01  | 0.9432 | -1.19 | 0.3723 | 1.53   | 0.2604 |
| 101123_at   | 1417999_at   | Itn2b           | integral membrane protein 2B                    | -1.21 | 0.08 | -1.04 | 0.1419 | -1.15 | 0.0277 | -1.16 | 0      | -1.1   | 0.1666 |
| 101126_r_at | 1420069_at   | ---             | ---                                             | -1.04 | 0.95 | -1.53 | 0.1977 | 1.02  | 0.967  | -1.16 | 0.7243 | -1.41  | 0.4768 |
| 101127_at   | 1419628_at   | Chx10           | C. elegans ceh-10 homeo domain containing       | -7.47 | 0    | 1.06  | 0.7262 | -1.36 | 0.1351 | -1.01 | 0.9705 | -1.14  | 0.7567 |
| 101128_at   | 1420442_at   | Cacna1s /// LOC | calcium channel, voltage-dependent, L type,     | 1.11  | 0.84 | -2.02 | 0.0901 | -1.83 | 0.1314 | -1.52 | 0.2881 | 1.99   | 0.1583 |
| 101129_at   | 1423665_a_at | Rpl5            | ribosomal protein L5                            | 1.12  | 0.15 | 1.22  | 0.0003 | 1.15  | 0.0111 | 1.19  | 0.0004 | 1.5    | 0.0491 |
| 101130_at   | 1450857_a_at | Col1a2          | procollagen, type I, alpha 2                    | 2.37  | 0.1  | 1.24  | 0.595  | -1.13 | 0.7039 | 1.73  | 0.2415 | 1.51   | 0.0817 |
| 101131_at   | 1450299_at   | Chrna7          | cholinergic receptor, nicotinic, alpha polypep  | -1.11 | 0.27 | 1     | 0.9728 | -1.06 | 0.722  | -1.11 | 0.4643 | 1.71   | 0.0771 |
| 101133_at   | 1422306_at   | Lcn3            | lipocalin 3                                     | -1.22 | 0.35 | 1.17  | 0.4981 | -1.17 | 0.2145 | -1.24 | 0.0591 | 1.34   | 0.4416 |
| 101134_at   | 1452568_at   | Gcap8           | granule cell antiserum positive 8               | -1.45 | 0.13 | -1.16 | 0.3412 | -1.19 | 0.2885 | -1.44 | 0.0092 | 1.01   | 0.9811 |

|             |              |             |                                                 |       |      |       |        |       |        |       |        |       |        |
|-------------|--------------|-------------|-------------------------------------------------|-------|------|-------|--------|-------|--------|-------|--------|-------|--------|
| 101135_at   | 1418688_at   | Calcr       | calcitonin receptor                             | 1.78  | 0.34 | -1.82 | 0.0946 | -1.11 | 0.7293 | -1.22 | 0.5128 | 1.38  | 0.6203 |
| 101136_at   | 1450272_at   | Tnfsf8      | tumor necrosis factor (ligand) superfamily, r   | -2.42 | 0.05 | -1.12 | 0.4454 | -1.07 | 0.6358 | 1.22  | 0.5222 | -1.1  | 0.3148 |
| 101137_at   | 1435151_a_at | Rps3        | ribosomal protein S3                            | 1.23  | 0.34 | 1.19  | 0.0088 | 1.22  | 0.0309 | 1.16  | 0.1409 | 1.54  | 0.0336 |
| 101138_at   | 1450319_at   | Gabbr2      | gamma-aminobutyric acid (GABA-A) recept         | 1.07  | 0.73 | 1.54  | 0.0586 | 1.53  | 0.2049 | 1.93  | 0.0976 | 2.41  | 0.023  |
| 101139_r_at | 1449587_a_at | Muc10       | mucin 10, submandibular gland salivary muc      | 1.32  | 0.54 | 1.12  | 0.7    | 1.39  | 0.3383 | -1.06 | 0.8631 | 1.85  | 0.0269 |
| 101140_at   | 1450219_at   | Htr1a       | 5-hydroxytryptamine (serotonin) receptor 1A     | -1.82 | 0.04 | 1.06  | 0.7629 | 1.27  | 0.3101 | -1.06 | 0.8395 | 1.7   | 0.1154 |
| 101141_at   | 1427806_at   | ---         | ---                                             | 1.8   | 0.13 | -1.14 | 0.5897 | 1.05  | 0.8463 | -1.18 | 0.497  | 1.52  | 0.5274 |
| 101142_at   | 1448662_at   | Fzd6        | frizzled homolog 6 (Drosophila)                 | -1.19 | 0.36 | 1.48  | 0.203  | 1.03  | 0.8767 | 1.21  | 0.3484 | 1.59  | 0.3507 |
| 101143_at   | 1450043_at   | Fzd7        | frizzled homolog 7 (Drosophila)                 | -1.67 | 0.04 | -1.2  | 0.0296 | -1.08 | 0.3915 | -1.16 | 0.0249 | 1.11  | 0.6907 |
| 101144_at   | 1421628_at   | Il18r1      | interleukin 18 receptor 1                       | -1.07 | 0.85 | 1.31  | 0.375  | 1.35  | 0.1428 | 1.52  | 0.2215 | 1.46  | 0.2655 |
| 101145_at   | 1421512_at   | Cep2        | centrosomal protein 2                           | 2.22  | 0.18 | 1.34  | 0.3672 | 1.01  | 0.9638 | 1.54  | 0.2204 | -1    | 0.9959 |
| 101146_at   | 1450002_at   | Gsh1        | genomic screened homeo box 1                    | -1.81 | 0.05 | -1.47 | 0.0331 | -1.36 | 0.0349 | -1.28 | 0.3878 | 1.24  | 0.5613 |
| 101147_at   | 1420544_at   | Gcet2       | germinal center expressed transcript 2          | -1.69 | 0.09 | -1.22 | 0.0366 | -1.03 | 0.7539 | -1.19 | 0.1887 | 1.05  | 0.8077 |
| 101148_at   | 1448695_at   | Prkci       | protein kinase C, iota                          | -1.01 | 0.99 | -1.05 | 0.7128 | -1.15 | 0.4026 | -1.1  | 0.488  | -1.09 | 0.5077 |
| 101149_at   | 1450326_at   | Shc3        | src homology 2 domain-containing transforr      | -5.25 | 0.24 | 1.22  | 0.2465 | 1.32  | 0.1256 | 1.24  | 0.1459 | 1.24  | 0.6437 |
| 101150_at   | 1421773_at   | Etsrp71     | ets related protein 71                          | 2.68  | 0.01 | -1.23 | 0.4012 | -1.39 | 0.1539 | -1.02 | 0.9036 | -1.07 | 0.8444 |
| 101151_at   | 1450215_at   | Rcvrn       | recoverin                                       | 1.11  | 0.23 | 1.44  | 0.017  | 1.26  | 0.0282 | 1.18  | 0.0585 | -1.02 | 0.9333 |
| 101152_at   | 1422207_at   | Htr5a       | 5-hydroxytryptamine (serotonin) receptor 5A     | -1.38 | 0.02 | -1.21 | 0.0819 | -1.05 | 0.4905 | -1.15 | 0.1591 | 1.11  | 0.5269 |
| 101153_at   | 1452564_at   | Ofa         | oncofetal antigen                               | -1.09 | 0.91 | -1.1  | 0.7513 | -1.01 | 0.9616 | 1.16  | 0.6094 | 3.11  | 0.0379 |
| 101154_at   | 1420141_at   | AA517023    | expressed sequence AA517023                     | 1.01  | 0.97 | -1.46 | 0.2548 | -1.56 | 0.3042 | 1.05  | 0.8943 | 3.64  | 0.1899 |
| 101155_at   | 1449306_at   | Hsf2        | heat shock factor 2                             | 1.07  | 0.9  | 1.67  | 0.0821 | -1.12 | 0.7986 | -1.07 | 0.8233 | 1.8   | 0.0289 |
| 101156_at   | 1452552_at   | Npn2        | neoplastic progression 2                        | 1.37  | 0.45 | -1.19 | 0.7012 | -1.47 | 0.3408 | -1.15 | 0.745  | 1.42  | 0.3135 |
| 101158_at   | 1449913_at   | Zfp2        | zinc finger protein 2                           | 2.29  | 0.07 | -1.32 | 0.0237 | -1.12 | 0.1949 | -1.2  | 0.0401 | -3.62 | 0.04   |
| 101159_at   | 1422025_at   | Mitf        | microphthalmia-associated transcription fact    | -1.23 | 0.68 | 1.01  | 0.922  | -1.43 | 0.1983 | -1.07 | 0.7746 | 1.01  | 0.9886 |
| 101160_at   | 1449984_at   | Cxcl2       | chemokine (C-X-C motif) ligand 2                | -1.1  | 0.88 | 2.69  | 0.3354 | -1.09 | 0.7951 | 2.91  | 0.128  | 1.15  | 0.6845 |
| 101161_at   | 1422069_at   | Mcl1r       | melanocortin 1 receptor                         | -1.51 | 0.26 | -1.25 | 0.074  | -1.09 | 0.3109 | -1.32 | 0.0068 | -1.26 | 0.3327 |
| 101162_at   | 1420757_at   | Myf5        | myogenic factor 5                               | -1.91 | 0.58 | -1.03 | 0.9398 | -1.21 | 0.6005 | -1.76 | 0.1643 | 1.25  | 0.7718 |
| 101163_at   | 1418065_at   | Rag2        | recombination activating gene 2                 | -2.41 | 0.2  | -1.08 | 0.612  | 1.04  | 0.7889 | 1.04  | 0.7954 | 1.51  | 0.0237 |
| 101164_at   | 1421744_at   | Tnfsf4      | tumor necrosis factor (ligand) superfamily, r   | -1.05 | 0.89 | 1.01  | 0.9715 | 1.31  | 0.4236 | 1.2   | 0.4432 | 1.21  | 0.6853 |
| 101166_at   | 1450514_at   | Zfp29       | zinc finger protein 29                          | -1.37 | 0.24 | 1.28  | 0.0668 | 1.32  | 0.0906 | 1.27  | 0.0622 | 1.37  | 0.436  |
| 101167_at   | 1421598_at   | ---         | ---                                             | 1.97  | 0.05 | -1.34 | 0.3198 | -2.96 | 0.0017 | -1.72 | 0.0241 | 1.11  | 0.8744 |
| 101169_at   | 1420511_at   | Rds         | retinal degeneration, slow (retinitis pigmento  | -1    | 0.99 | -1.06 | 0.8263 | 1.03  | 0.9289 | -1.22 | 0.4977 | -1.05 | 0.919  |
| 101170_at   | 1450548_at   | Htr1f       | 5-hydroxytryptamine (serotonin) receptor 1F     | 1.04  | 0.94 | -1.41 | 0.0625 | -1.21 | 0.2764 | 1.1   | 0.686  | 2.06  | 0.1606 |
| 101171_at   | 1420457_at   | Dvl3        | dishevelled 3, dsh homolog (Drosophila)         | 1.61  | 0.14 | -1.19 | 0.1731 | -1.26 | 0.2078 | 1.07  | 0.6188 | 1.16  | 0.7275 |
| 101172_at   | 1421710_at   | Zfp92       | zinc finger protein 92                          | -1.92 | 0.35 | 1.42  | 0.164  | 1.04  | 0.8761 | -1.37 | 0.3169 | 1.49  | 0.4084 |
| 101173_at   | 1420983_at   | Pctp        | phosphatidylcholine transfer protein            | 1.68  | 0.44 | -1.58 | 0.0119 | -1.59 | 0.0335 | -2.45 | 0.0002 | -1.63 | 0.5554 |
| 101175_at   | 1422250_at   | Map3k2      | mitogen activated protein kinase kinase kina    | -1.23 | 0.13 | -1.49 | 0.4023 | -1.48 | 0.3411 | -1.95 | 0.1638 | -1.09 | 0.8654 |
| 101176_at   | 1422304_at   | Lcn4        | lipocalin 4                                     | -1.13 | 0.72 | 1.27  | 0.0957 | 1.09  | 0.461  | 1.05  | 0.7337 | 1.02  | 0.9374 |
| 101177_at   | 1422098_at   | Acvr1b      | activin A receptor, type 1B                     | -1.5  | 0.65 | 1.01  | 0.9775 | 1.62  | 0.1007 | -1.35 | 0.2681 | 1.21  | 0.2555 |
| 101178_at   | 1420696_at   | Sema3c      | sema domain, immunoglobulin domain (lg),        | 1.35  | 0.44 | 1.04  | 0.747  | 1.11  | 0.2971 | 1.09  | 0.4601 | 1.36  | 0.2626 |
| 101180_at   | 1421205_at   | Atm         | ataxia telangiectasia mutated homolog (hum      | -1.69 | 0.13 | -1.07 | 0.5365 | -1.48 | 0.0211 | -1.16 | 0.4462 | -1.17 | 0.1827 |
| 101181_at   | 1422181_at   | Cnga2       | cyclic nucleotide gated channel alpha 2         | -1.31 | 0.57 | 1.04  | 0.8947 | -1.01 | 0.9518 | 1.07  | 0.7848 | -1.36 | 0.2482 |
| 101182_at   | 1450525_at   | Gli3        | GLI-Kruppel family member GLI3                  | -1.36 | 0.56 | -1.14 | 0.492  | -1.1  | 0.6419 | -1.02 | 0.9276 | -1.85 | 0.1518 |
| 101183_at   | 1449866_at   | Syt2        | synaptotagmin 2                                 | -1.65 | 0.26 | 1.59  | 0.1201 | 1.85  | 0.0509 | 1.18  | 0.5901 | 1.34  | 0.4596 |
| 101184_at   | 1421671_at   | Hsd17b3     | hydroxysteroid (17-beta) dehydrogenase 3        | -1.64 | 0.46 | 1.05  | 0.829  | 1.15  | 0.4582 | -1.07 | 0.7498 | 1.28  | 0.4386 |
| 101185_at   | 1423027_at   | Foxl1       | Forkhead box L1                                 | -1.63 | 0.01 | -1.1  | 0.2016 | -1.05 | 0.4713 | -1.09 | 0.2083 | 1.29  | 0.1778 |
| 101186_at   | 1420747_at   | MGI:1349458 | per-pentamer repeat gene                        | -1.29 | 0.37 | 1.1   | 0.4548 | -1.02 | 0.9048 | -1.11 | 0.5733 | 1.28  | 0.3905 |
| 101187_at   | 1418813_at   | Serpina5    | serine (or cysteine) proteinase inhibitor, clac | -1.23 | 0.16 | -1.94 | 0.0125 | -1.25 | 0.3445 | -1.5  | 0.1513 | 1.05  | 0.8917 |
| 101188_at   | 1421468_at   | Kcnj3       | potassium inwardly-rectifying channel, subfa    | -1.37 | 0.24 | 1.15  | 0.5583 | 1.23  | 0.4077 | 1.2   | 0.4204 | 1.75  | 0.3045 |
| 101189_at   | 1450366_at   | Bid3        | BH3 interacting (with BCL2 family) domain, i    | -1.36 | 0.05 | 1.18  | 0.4199 | -1.04 | 0.8816 | 1.04  | 0.8813 | 1.34  | 0.6768 |
| 101190_at   | 1450352_at   | Mtnr1a      | melatonin receptor 1A                           | -1.36 | 0.58 | 1.22  | 0.5211 | -1.22 | 0.537  | 1.75  | 0.1074 | -1.82 | 0.1243 |
| 101191_at   | 1420666_at   | Doc2b       | double C2, beta                                 | -2.58 | 0.31 | 1.03  | 0.9325 | 1.59  | 0.1762 | -1.01 | 0.962  | 1     | 0.9925 |
| 101192_at   | 1420348_at   | Lhx5        | LIM homeobox protein 5                          | 1.04  | 0.94 | 1.49  | 0.2022 | 1.43  | 0.078  | 1.27  | 0.1402 | 2.11  | 0.3451 |

|             |              |                  |                                                  |       |      |       |        |       |        |       |        |       |        |
|-------------|--------------|------------------|--------------------------------------------------|-------|------|-------|--------|-------|--------|-------|--------|-------|--------|
| 101193_at   | 1421395_at   | Zik1             | zinc finger protein interacting with K protein   | -1.04 | 0.87 | -1.17 | 0.6631 | 1.31  | 0.4354 | -1.16 | 0.6598 | 2.37  | 0.225  |
| 101194_at   | 1420568_at   | Stras8           | stimulated by retinoic acid gene 8               | -1.9  | 0.09 | -1.1  | 0.4844 | -1.04 | 0.7937 | 1.03  | 0.8674 | 1.19  | 0.5615 |
| 101195_at   | 1420805_at   | Mylc2pl          | myosin light chain 2, precursor lymphocyte-ε     | -1.51 | 0.64 | 1     | 0.9903 | -1.18 | 0.2765 | -1.15 | 0.34   | 1.03  | 0.9287 |
| 101197_at   | 1421732_at   | Glrp1            | glutamine repeat protein 1                       | -1.69 | 0.11 | 1.05  | 0.6538 | -1    | 0.9693 | -1.03 | 0.7813 | 1.63  | 0.0346 |
| 101198_at   | 1417747_at   | Cplx1            | complexin 1                                      | -1.74 | 0.09 | -1.1  | 0.1618 | 1     | 0.9641 | -1.02 | 0.7513 | 1.02  | 0.8015 |
| 101199_at   | 1426072_at   | Cmk1r1           | chemokine-like receptor 1                        | -2.76 | 0.41 | 1.55  | 0.2556 | -1    | 0.9962 | 1.23  | 0.4039 | 1.88  | 0.2687 |
| 101200_at   | 1449920_at   | Cyp19a1          | cytochrome P450, family 19, subfamily a, pc      | -1.72 | 0.27 | 1.51  | 0.2936 | 1.28  | 0.2412 | 1.28  | 0.1646 | 1.54  | 0.4891 |
| 101202_at   | 1420297_at   | ---              | ---                                              | -1.04 | 0.91 | 1.1   | 0.5228 | 1.04  | 0.7583 | 1.11  | 0.4468 | 1.23  | 0.2508 |
| 101205_at   | 1449808_at   | ---              | CDNA clone IMAGE:6405353                         | 1.43  | 0.21 | 1.38  | 0.1961 | 1.19  | 0.5934 | -1.02 | 0.8976 | -1.57 | 0.4113 |
| 101206_at   | 1420289_at   | T25656           | expressed sequence T25656                        | 1.59  | 0.39 | -1.19 | 0.4365 | -1.33 | 0.282  | -1.09 | 0.608  | 1.01  | 0.9671 |
| 101207_at   | 1417451_a_at | Ppia             | peptidylprolyl isomerase A                       | 1.02  | 0.56 | 1.06  | 0.1398 | 1.09  | 0.0456 | 1.11  | 0.0225 | 1.05  | 0.5333 |
| 101208_at   | 1421533_at   | Slc7a1           | solute carrier family 7 (cationic amino acid tr  | -1.01 | 0.96 | -1    | 0.9723 | 1.13  | 0.5568 | 1.12  | 0.5244 | 1.25  | 0.1372 |
| 101209_at   | 1421775_at   | Fcfer1a          | Fc receptor, IgE, high affinity I, alpha polype  | -2.25 | 0.03 | -1.77 | 0.007  | 1.1   | 0.8401 | -1.42 | 0.1789 | -1.04 | 0.9196 |
| 101211_at   | 1447494_at   | D7Bwg0826e       | DNA segment, Chr 7, Brigham & Women's C          | 2.41  | 0.01 | -1.66 | 0.2197 | -1.6  | 0.2533 | -1.93 | 0.1377 | -1.78 | 0.313  |
| 101212_at   | 1455364_a_at | Rps7             | ribosomal protein S7                             | 1.27  | 0.37 | 1.08  | 0.271  | 1.08  | 0.236  | 1.17  | 0.024  | 1.27  | 0.0393 |
| 101213_at   | 1419441_at   | Arbp             | acidic ribosomal phosphoprotein P0               | 1     | 0.98 | -1.02 | 0.4962 | 1.15  | 0.0288 | 1.07  | 0.0958 | 1.13  | 0.3284 |
| 101215_at   | 1421738_at   | Gabra2           | gamma-aminobutyric acid (GABA-A) receptc         | -1.6  | 0.62 | -1.01 | 0.9441 | 1.33  | 0.4187 | -1.17 | 0.5023 | -1.82 | 0.0902 |
| 101216_at   | 1420287_at   | ---              | Transcribed locus                                | 1.73  | 0.35 | -2.05 | 0.0318 | -1.39 | 0.2857 | -1.72 | 0.0507 | 1.14  | 0.7855 |
| 101220_at   | 1449765_at   | ---              | ---                                              | -1.1  | 0.86 | -1.62 | 0.031  | -1.81 | 0.0363 | -1.66 | 0.0705 | 1.58  | 0.1865 |
| 101221_at   | 1419992_x_at | ---              | ---                                              | 1.02  | 0.9  | -1.14 | 0.0158 | 1.16  | 0.0687 | -1.15 | 0.017  | 1.39  | 0.133  |
| 101223_r_at | 1449690_x_at | ---              | ---                                              | -1.61 | 0.18 | -1.38 | 0.3343 | -1.11 | 0.6937 | -1.37 | 0.2876 | 1.48  | 0.5656 |
| 101224_at   | 1445125_at   | D8Erd107e        | DNA segment, Chr 8, ERATO Doi 107, expr          | -1.41 | 0.61 | 1.15  | 0.4047 | -1.11 | 0.5492 | 1     | 0.9904 | 1.31  | 0.3542 |
| 101225_at   | 1448085_at   | D5Erd102e        | DNA segment, Chr 5, ERATO Doi 102, expr          | -1.44 | 0.1  | -1.4  | 0.0001 | -1.07 | 0.371  | -1.38 | 0.0004 | 1.14  | 0.2444 |
| 101226_at   | 1444943_at   | Sh3md2           | SH3 multiple domains 2                           | -1.37 | 0.12 | -1.08 | 0.1734 | -1.08 | 0.3684 | -1.19 | 0.0472 | 1.1   | 0.3493 |
| 101227_at   | 1448090_at   | ---              | Transcribed locus                                | -2.05 | 0.13 | -1.22 | 0.2553 | 1.12  | 0.4627 | -1.15 | 0.3155 | 1.14  | 0.7038 |
| 101228_at   | 1459918_at   | Bub3             | budding uninhibited by benzimidazoles 3 ho       | -2.92 | 0.26 | -1.41 | 0.0809 | 1.03  | 0.9157 | -1.35 | 0.1189 | 1.26  | 0.7052 |
| 101229_at   | 1448088_at   | C78228           | expressed sequence C78228                        | -1.12 | 0.67 | -1.08 | 0.7263 | -1.2  | 0.4896 | -1.32 | 0.2774 | 1.03  | 0.8864 |
| 101231_at   | 1446695_at   | Xm1              | RIKEN cDNA A130001C09 gene                       | -3.1  | 0.03 | -1.44 | 0.032  | -1.06 | 0.5015 | -1.1  | 0.539  | 1.48  | 0.3552 |
| 101232_at   | 1444829_at   | C78532           | expressed sequence C78532                        | -1.19 | 0.72 | -1.69 | 0.1995 | -1.29 | 0.4869 | -1.64 | 0.1578 | 1.01  | 0.9905 |
| 101233_at   | 1448082_at   | Clcn1            | Chloride channel 1                               | -1.46 | 0.43 | 1.22  | 0.3848 | 1.31  | 0.1999 | 1.25  | 0.3037 | 1.35  | 0.0084 |
| 101234_at   | 1458862_at   | C78704           | expressed sequence C78704                        | 1.4   | 0.41 | -1.38 | 0.4059 | -1.68 | 0.2409 | -1.55 | 0.231  | 1.65  | 0.4096 |
| 101254_at   | 1439270_x_at | Ran              | RAN, member RAS oncogene family                  | 1.01  | 0.92 | -1.02 | 0.6756 | 1.05  | 0.474  | -1.06 | 0.2618 | -1.24 | 0.0016 |
| 101255_at   | 1453723_x_at | Ubb              | ubiquitin B                                      | 1.15  | 0.26 | 1.13  | 0.0007 | 1.18  | 0.0047 | 1.13  | 0.0392 | 1.13  | 0.1448 |
| 101278_at   | 1432032_a_at | Artn             | artemin                                          | -2.64 | 0.07 | 1.03  | 0.8981 | 1.11  | 0.673  | 1.07  | 0.7938 | 1.2   | 0.5222 |
| 101280_at   | 1460313_at   | Olf1r2           | olfactory receptor 2                             | -1.85 | 0.08 | -1.05 | 0.675  | 1.38  | 0.0535 | 1.02  | 0.831  | 1.22  | 0.5684 |
| 101281_at   | 1422370_at   | Olf1r49 /// MOR1 | olfactory receptor 49 /// olfactory receptor M   | -1.68 | 0.34 | -1.08 | 0.7656 | -1.15 | 0.5496 | -1.22 | 0.3273 | -2    | 0.0462 |
| 101282_at   | 1422275_at   | Gpr44            | G protein-coupled receptor 44                    | -1.11 | 0.63 | -1.12 | 0.1552 | -1.1  | 0.3184 | -1.24 | 0.0099 | 1.2   | 0.1758 |
| 101286_at   | 1422274_at   | Gja8             | gap junction membrane channel protein alpt       | -1.64 | 0.4  | 1.32  | 0.2123 | 1.06  | 0.7975 | 1.07  | 0.7695 | -1.6  | 0.0664 |
| 101288_at   | 1422319_at   | Fv4              | Friend virus susceptibility 4                    | -1.24 | 0.54 | 1.03  | 0.8806 | 1.35  | 0.1898 | 1.18  | 0.6392 | 2.07  | 0.2712 |
| 101289_f_at | 1425182_x_at | Klk22 /// Klk9   | kallikrein 22 /// kallikrein 9                   | 1.02  | 0.92 | -1.1  | 0.2155 | -1.01 | 0.9372 | -1.09 | 0.2729 | -1.01 | 0.9446 |
| 101294_g_at | 1422327_s_at | G6pd2 /// G6pd:  | glucose-6-phosphate dehydrogenase 2 /// gl       | -2.17 | 0.25 | -1.12 | 0.7673 | -1.16 | 0.5613 | 1.13  | 0.7661 | -1.04 | 0.8934 |
| 101295_s_at | 1427548_a_at | Clns1a           | chloride channel, nucleotide-sensitive, 1A       | -1.05 | 0.87 | 1.01  | 0.8943 | 1.1   | 0.3845 | -1.02 | 0.8335 | 1.09  | 0.833  |
| 101302_at   | 1421538_at   | Kcnd1            | potassium voltage-gated channel, Shal-relat      | 1.2   | 0.51 | -1.19 | 0.1652 | -1.21 | 0.2287 | 1.02  | 0.9367 | 1.89  | 0.142  |
| 101303_at   | 1422372_at   | Olf1r15          | olfactory receptor 15                            | -2.11 | 0.02 | 1.08  | 0.7246 | -1.28 | 0.3033 | -1.11 | 0.4296 | 1.49  | 0.0772 |
| 101305_at   | 1422331_at   | Pou3f3           | POU domain, class 3, transcription factor 3      | 1.47  | 0.31 | -1.35 | 0.4205 | -1.23 | 0.5656 | -1.16 | 0.699  | 1.48  | 0.3747 |
| 101307_at   | 1424352_at   | MGC25972         | similar to cytochrome P450, 4a10                 | -4.55 | 0.06 | 2.23  | 0.0025 | 1.13  | 0.1555 | 2.15  | 0.0002 | -5.69 | 0.0008 |
| 101309_at   | 1450577_at   | Sstr3            | somatostatin receptor 3                          | -1.26 | 0.43 | 1.16  | 0.262  | -1.05 | 0.6596 | 1.04  | 0.724  | 1.2   | 0.3074 |
| 101310_at   | 1460309_at   | Tal2             | T-cell acute lymphocytic leukemia 2              | 1.28  | 0.63 | -1.58 | 0.1232 | -1.27 | 0.3779 | -1.37 | 0.2669 | -1.01 | 0.9874 |
| 101311_at   | 1427765_a_at | Tcrb-V13 /// LO1 | T-cell receptor beta, variable 13 /// similar to | 1.25  | 0.45 | -2.5  | 0.0173 | -1.28 | 0.4944 | -2.77 | 0.0117 | 1.18  | 0.763  |
| 101312_at   | 1422223_at   | Grin2b           | glutamate receptor, ionotropic, NMDA2B (ep       | 1.55  | 0.24 | -1.31 | 0.0527 | 1.18  | 0.4599 | -1.09 | 0.6031 | -1.2  | 0.6923 |
| 101315_at   | 1427832_at   | Tuba-rs1         | tubulin alpha, related sequence 1                | 1.22  | 0.66 | 1.1   | 0.3322 | 1.4   | 0.1372 | 1.09  | 0.4988 | 1.04  | 0.8247 |
| 101318_at   | 1450527_at   | Sstr1            | somatostatin receptor 1                          | 1.05  | 0.92 | 1.43  | 0.0123 | 1.37  | 0.0105 | 1.17  | 0.1597 | -1.09 | 0.7616 |
| 101325_r_at | 1425276_at   | Fbs1             | fibrosin 1                                       | -1.32 | 0.62 | 1.57  | 0.0121 | 1.39  | 0.104  | 1.5   | 0.0597 | -1.07 | 0.7869 |

|             |              |               |                                                   |       |      |       |        |       |        |       |        |       |        |
|-------------|--------------|---------------|---------------------------------------------------|-------|------|-------|--------|-------|--------|-------|--------|-------|--------|
| 101329_f_at | 1427837_at   | Igk-V32       | immunoglobulin kappa chain variable 32 (V3        | 1.66  | 0.26 | 1.55  | 0.2663 | -1.02 | 0.9498 | -1.05 | 0.8752 | 1.42  | 0.2488 |
| 101331_f_at | 1427860_at   | ---           | Similar to immunoglobulin light chain             | 2.08  | 0.19 | 2.58  | 0.0159 | 1.22  | 0.5476 | 2.06  | 0.0484 | 1.8   | 0.3685 |
| 101332_at   | 1426178_at   | Igk-V8        | Immunoglobulin kappa chain, constant regio        | -1.74 | 0.29 | -1.03 | 0.8874 | -1.09 | 0.7452 | 1.01  | 0.9575 | 1.06  | 0.8876 |
| 101334_at   | 1452528_a_at | Nkx2-3        | NK2 transcription factor related, locus 3 (Dro    | -1.03 | 0.96 | -1.37 | 0.2857 | -1.14 | 0.7341 | -1.16 | 0.5916 | 1.44  | 0.4471 |
| 101335_at   | 1450465_at   | Cdk5r2        | cyclin-dependent kinase 5, regulatory subun       | -2    | 0.31 | 1.07  | 0.7444 | 1.2   | 0.2837 | 1.49  | 0.2167 | -1.03 | 0.9579 |
| 101337_at   | 1426077_at   | Moxd2         | monooxygenase, DBH-like 2                         | -1.42 | 0.43 | 1.13  | 0.452  | 1.31  | 0.2728 | -1.34 | 0.1211 | 1.68  | 0.0954 |
| 101341_at   | 1450529_at   | H2-M9         | histocompatibility 2, M region locus 9            | 1.36  | 0.51 | 1.07  | 0.6374 | -1.04 | 0.8444 | -1.07 | 0.6576 | 1.36  | 0.3469 |
| 101342_at   | 1451889_at   | Notch2        | Notch gene homolog 2 (Drosophila)                 | -2.12 | 0.29 | 1.11  | 0.7965 | 1.3   | 0.4391 | 1.02  | 0.9463 | 1.67  | 0.0779 |
| 101343_at   | 1423024_at   | ---           | ---                                               | -1.76 | 0.1  | -1.09 | 0.4969 | -1.03 | 0.8508 | -1.05 | 0.7406 | 1.22  | 0.4315 |
| 101344_at   | 1460663_at   | Cckbr         | cholecystokinin B receptor                        | -1.29 | 0.13 | -1.1  | 0.1632 | -1.05 | 0.3926 | -1.2  | 0.0079 | 1.12  | 0.5311 |
| 101345_at   | 1447953_at   | Egfl8         | EGF-like domain 8                                 | -1.13 | 0.32 | -1.05 | 0.5009 | -1.07 | 0.36   | -1.11 | 0.173  | 1.26  | 0.2113 |
| 101346_at   | 1452535_at   | ---           | Ig rearranged heavy chain (NC12-H7) mRN           | -3.06 | 0.03 | 1.17  | 0.5329 | 1.89  | 0.0715 | 1.15  | 0.6681 | -1.8  | 0.0896 |
| 101347_at   | 1452536_s_at | Igk-V1        | Immunoglobulin kappa chain variable 21 (V2        | 1.12  | 0.81 | 1.18  | 0.3197 | 1.06  | 0.7902 | 1.2   | 0.3677 | 1.59  | 0.0807 |
| 101348_at   | 1427753_at   | ---           | Similar to Ig kappa chain precursor V region      | -1.48 | 0.43 | 1.37  | 0.2004 | 1.14  | 0.5656 | 1.1   | 0.6634 | 2.83  | 0.0181 |
| 101354_at   | 1422203_at   | Slc18a3       | solute carrier family 18 (vesicular monoamin      | -1.15 | 0.52 | -1.05 | 0.6305 | -1.05 | 0.5283 | -1.15 | 0.1012 | -1.07 | 0.7444 |
| 101355_at   | 1422396_s_at | Ascl2         | achaete-scute complex homolog-like 2 (Dros        | -1.81 | 0.22 | -1.24 | 0.452  | -1.39 | 0.3484 | -1.86 | 0.0963 | 1.15  | 0.7288 |
| 101356_at   | 1426100_a_at | Tk2           | thymidine kinase 2, mitochondrial                 | 3.52  | 0.06 | 1.18  | 0.2279 | -1.09 | 0.5735 | 1.12  | 0.4149 | 1.34  | 0.166  |
| 101357_at   | 1460724_at   | Ap2a1         | adaptor protein complex AP-2, alpha 1 subu        | -1.27 | 0.55 | 1.12  | 0.342  | 1.1   | 0.4634 | 1.03  | 0.7155 | -1.69 | 0.0239 |
| 101358_at   | 1448661_at   | Plcb3         | phospholipase C, beta 3                           | -1.07 | 0.88 | 1.04  | 0.705  | 1.09  | 0.2977 | 1.22  | 0.3897 | -1.21 | 0.5167 |
| 101359_at   | 1416513_at   | Lamb2         | laminin, beta 2                                   | 1.98  | 0.03 | 1.17  | 0.2616 | 1.13  | 0.3505 | -1.06 | 0.7682 | 1.07  | 0.8386 |
| 101363_at   | 1460710_at   | ---           | ---                                               | -1.1  | 0.45 | -1.01 | 0.937  | -1.04 | 0.6311 | -1.01 | 0.9314 | 1.23  | 0.265  |
| 101364_at   | 1427519_at   | ---           | ---                                               | -2.87 | 0.01 | -1.07 | 0.6472 | 1.01  | 0.9134 | -1.13 | 0.2583 | 1.67  | 0.048  |
| 101366_f_at | 1453018_at   | Nvl           | nuclear VCP-like                                  | -1.17 | 0.5  | -1.18 | 0.2869 | 1.06  | 0.6933 | 1.18  | 0.138  | 1.32  | 0.4099 |
| 101367_at   | 1435414_s_at | ---           | ---                                               | -1.15 | 0.73 | -1.08 | 0.3741 | -1.1  | 0.3632 | -1.09 | 0.364  | -1.04 | 0.8343 |
| 101368_at   | 1423429_at   | Pem           | placentae and embryos oncofetal gene              | 2.38  | 0.14 | 2.19  | 0.1136 | 1.11  | 0.6313 | 2.39  | 0.1343 | -1.09 | 0.851  |
| 101369_at   | 1433705_at   | 6330415G19Rik | RIKEN cDNA 6330415G19 gene                        | 1.02  | 0.96 | 1.09  | 0.6317 | 1.07  | 0.6937 | -1.03 | 0.8769 | 1.88  | 0.1376 |
| 101370_at   | 1460260_s_at | Kpna1         | karyopherin (importin) alpha 1                    | -1.06 | 0.86 | -1.17 | 0.1048 | 1.09  | 0.223  | -1.06 | 0.401  | 1.05  | 0.8454 |
| 101371_at   | 1424469_a_at | Cpsf4         | cleavage and polyadenylation specific factor      | 1.89  | 0.07 | 1.05  | 0.6435 | -1.01 | 0.9276 | 1.03  | 0.8033 | -1.03 | 0.7735 |
| 101372_at   | 1429295_s_at | Trip13        | thyroid hormone receptor interactor 13            | -2.19 | 0.06 | -1.21 | 0.6102 | -1.33 | 0.2949 | -1.38 | 0.3023 | -2.56 | 0.2076 |
| 101374_at   | 1451859_at   | Krtap6-1      | keratin associated protein 6-1                    | -1.25 | 0.29 | -1.69 | 0.0151 | -1.26 | 0.1707 | -1.39 | 0.0793 | 1.38  | 0.272  |
| 101375_at   | 1420751_at   | Krtap6-1      | keratin associated protein 6-1                    | -3.59 | 0.19 | -2.37 | 0.0572 | -2.71 | 0.0376 | -2.27 | 0.068  | -1.14 | 0.6948 |
| 101376_at   | 1425872_at   | Krtap6-1      | keratin associated protein 6-1                    | -1.56 | 0.05 | -1.36 | 0.0235 | -1.1  | 0.4824 | -1.4  | 0.0396 | 1.19  | 0.324  |
| 101380_at   | 1424753_at   | Nudt14        | nudix (nucleoside diphosphate linked moiety       | 2.55  | 0.05 | 1.03  | 0.7862 | 1.12  | 0.3901 | 1.12  | 0.276  | 1.09  | 0.6306 |
| 101381_at   | 1421305_x_at | Rabep1        | rabaptin, RAB GTPase binding effector prot        | 1.41  | 0.23 | 1.43  | 0.0001 | 1.47  | 0.007  | 1.33  | 0.0003 | -1.28 | 0.5817 |
| 101382_at   | 1449261_at   | Pbx2          | pre B-cell leukemia transcription factor 2        | 1.51  | 0.28 | -1.08 | 0.5519 | -1.17 | 0.1663 | 1.05  | 0.6871 | 2.92  | 0.0005 |
| 101383_at   | 1419606_a_at | Tnnt1         | troponin T1, skeletal, slow                       | -1.02 | 0.91 | 1.04  | 0.8348 | 1.1   | 0.68   | 1.09  | 0.6278 | -1.4  | 0.2111 |
| 101384_at   | 1424549_at   | Degs2         | degenerative spermatocyte homolog 2 (Dros         | -1.09 | 0.35 | 1.01  | 0.9369 | 1.28  | 0.1801 | 1.1   | 0.5926 | 1.42  | 0.1491 |
| 101386_at   | 1417735_at   | 1810030J14Rik | RIKEN cDNA 1810030J14 gene                        | -1.45 | 0.18 | -1.17 | 0.4482 | -1.26 | 0.2647 | -1.17 | 0.4653 | 1.12  | 0.8407 |
| 101388_at   | 1416784_at   | Pgk2          | phosphoglycerate kinase 2                         | -2.62 | 0.26 | -1.14 | 0.6913 | 1.32  | 0.4046 | -1.42 | 0.3315 | 1.74  | 0.172  |
| 101389_at   | 1460235_at   | Scarb2        | scavenger receptor class B, member 2              | 1.22  | 0.37 | 1.3   | 0.0002 | 1.29  | 0.0009 | 1.22  | 0.0009 | -1.01 | 0.9094 |
| 101390_at   | 1427374_at   | Muc3          | mucin 3, intestinal                               | -1.62 | 0.1  | 1.52  | 0.1941 | 1.48  | 0.563  | -1.13 | 0.4555 | 1.7   | 0.3462 |
| 101392_at   | 1451300_a_at | Chmp7         | CHMP family, member 7                             | -1.72 | 0.03 | -1.12 | 0.0739 | 1.08  | 0.5216 | -1.27 | 0.0021 | -1.12 | 0.4506 |
| 101393_at   | 1460330_at   | Anxa3         | annexin A3                                        | 1.64  | 0.22 | 1.06  | 0.8444 | 1.03  | 0.9036 | 1.29  | 0.247  | 3.32  | 0.0099 |
| 101395_at   | 1436940_at   | Purb          | Purine rich element binding protein B             | 1.1   | 0.68 | -1.04 | 0.6225 | 1     | 0.9995 | -1.07 | 0.397  | 1.3   | 0.0056 |
| 101396_at   | 1451687_a_at | Tcf2          | transcription factor 2                            | 1.11  | 0.67 | 1.15  | 0.2486 | -1.04 | 0.7422 | 1.04  | 0.7205 | 1.12  | 0.7645 |
| 101397_at   | 1450628_at   | Slc2a8        | solute carrier family 2, (facilitated glucose tra | -1.12 | 0.44 | -1.03 | 0.4036 | 1.06  | 0.4131 | 1.01  | 0.8049 | -1.05 | 0.5732 |
| 101398_at   | 1448341_a_at | Stxbp2        | syntaxin binding protein 2                        | 1.13  | 0.53 | -1.1  | 0.0815 | -1.02 | 0.8197 | 1     | 0.8961 | -1.15 | 0.3609 |
| 101399_at   | 1418670_s_at | ---           | ---                                               | -1.21 | 0.81 | 1.02  | 0.9154 | -1.02 | 0.9331 | -1.19 | 0.374  | 1.35  | 0.1421 |
| 101401_at   | 1416867_at   | Bet1          | blocked early in transport 1 homolog (S. cere     | -1.01 | 0.99 | -1.17 | 0.1196 | -1.11 | 0.4635 | -1.22 | 0.0424 | -1.47 | 0.1095 |
| 101402_at   | 1424180_a_at | Thrap4        | thyroid hormone receptor associated protein       | -1.47 | 0.01 | -1.12 | 0.0692 | -1.04 | 0.551  | -1.12 | 0.0123 | 1.01  | 0.8239 |
| 101403_at   | 1418777_at   | Ccl25         | chemokine (C-C motif) ligand 25                   | 1.84  | 0.1  | 2.34  | 0.0003 | 2.33  | 0.0209 | 1.98  | 0.0251 | 1.3   | 0.4199 |
| 101404_at   | 1451265_at   | 2310061109Rik | RIKEN cDNA 2310061109 gene                        | 5.65  | 0.03 | -1.02 | 0.8852 | 1.28  | 0.2368 | 1.3   | 0.0716 | 1.88  | 0.2708 |
| 101405_at   | 1448913_at   | Smarcd1       | SWI/SNF related, matrix associated, actin di      | -1.23 | 0.59 | 1.19  | 0.0026 | 1.17  | 0.2014 | 1.01  | 0.8617 | 1.19  | 0.2899 |

|             |              |              |                                                |       |      |       |        |       |        |       |        |       |        |
|-------------|--------------|--------------|------------------------------------------------|-------|------|-------|--------|-------|--------|-------|--------|-------|--------|
| 101406_at   | 1417335_at   | Sult2b1      | sulfotransferase family, cytosolic, 2B, memb   | -1.94 | 0.06 | -1.5  | 0.0044 | -1.17 | 0.1387 | -1.19 | 0.0968 | 1.1   | 0.5358 |
| 101407_at   | 1427282_a_at | Fxn          | frataxin                                       | 1.86  | 0.06 | 1.11  | 0.4238 | 1.11  | 0.4307 | -1.09 | 0.3473 | 1.18  | 0.6402 |
| 101408_at   | 1422558_at   | Gamt         | guanidinoacetate methyltransferase             | -1.01 | 0.97 | -1.24 | 0.0017 | -1.07 | 0.5126 | -1.37 | 0.0011 | -1.14 | 0.5427 |
| 101409_at   | 1451211_a_at | Lgtn         | ligatin                                        | 1.07  | 0.83 | -1.07 | 0.3049 | 1.17  | 0.0152 | -1.04 | 0.5558 | -1.44 | 0.0397 |
| 101410_at   | 1418283_at   | Cldn4        | claudin 4                                      | -1.94 | 0.07 | -1.54 | 0.0568 | -1.49 | 0.116  | -1.03 | 0.8609 | 1.12  | 0.7251 |
| 101412_at   | 1432103_a_at | Sh3gl3       | SH3-domain GRB2-like 3                         | -1.06 | 0.81 | 1.07  | 0.7608 | 1.04  | 0.8161 | -1.1  | 0.4845 | 2.67  | 0.1571 |
| 101414_at   | 1448531_at   | Lmnb2        | lamin B2                                       | -1.3  | 0.28 | 1.11  | 0.4997 | 1.11  | 0.3854 | 1.17  | 0.3592 | 1.36  | 0.2961 |
| 101416_f_at | 1423163_at   | Bat4         | HLA-B associated transcript 4                  | 1.03  | 0.78 | 1.03  | 0.5078 | 1.04  | 0.677  | 1.02  | 0.769  | 1.21  | 0.1848 |
| 101417_at   | 1427252_at   | Dmrtb1       | DMRT-like family B with proline-rich C-termi   | 1.31  | 0.36 | -1.23 | 0.5194 | 1.02  | 0.9391 | -1.76 | 0.066  | 2.6   | 0.1022 |
| 101419_at   | 1423221_at   | Tubb4        | tubulin, beta 4                                | -2.07 | 0.07 | -1.07 | 0.5387 | 1.06  | 0.5357 | -1.01 | 0.9379 | 1.46  | 0.0617 |
| 101420_at   | 1422756_at   | Slc32a1      | solute carrier family 32 (GABA vesicular trar  | -1.21 | 0.76 | -1.12 | 0.5341 | -1.18 | 0.4292 | -1.15 | 0.3917 | 1.14  | 0.5929 |
| 101421_at   | 1422888_at   | Rnf5         | ring finger protein 5                          | 1.03  | 0.9  | -1.09 | 0.2199 | -1.05 | 0.5107 | -1.23 | 0.007  | -1.37 | 0.0326 |
| 101424_at   | 1425719_a_at | Nmi          | N-myc (and STAT) interactor                    | 1.39  | 0.14 | -1.32 | 0.2946 | -1.16 | 0.4257 | -1.16 | 0.3626 | -1.76 | 0.2194 |
| 101425_at   | 1448273_at   | Gss          | glutathione synthetase                         | -1.04 | 0.83 | 1.21  | 0.0345 | 1.27  | 0.0471 | 1.3   | 0.0002 | 1.27  | 0.1039 |
| 101426_at   | 1434034_at   | Cerk         | ceramide kinase                                | 5.58  | 0.15 | -1.02 | 0.8937 | -1.08 | 0.4476 | 2.14  | 0.2403 | -1.22 | 0.6035 |
| 101429_at   | 1417516_at   | Ddit3        | DNA-damage inducible transcript 3              | 1.1   | 0.57 | 1.48  | 0.4259 | -1.18 | 0.6459 | 1.51  | 0.3682 | 1.57  | 0.0012 |
| 101431_at   | 1418808_at   | Rdh5         | retinol dehydrogenase 5                        | 5.39  | 0.04 | -1    | 0.982  | -1.05 | 0.5843 | 1.19  | 0.0551 | -1.01 | 0.9623 |
| 101432_at   | 1455315_at   | 2410019G02Ri | RIKEN cDNA 2410019G02 gene                     | -1.11 | 0.63 | -1.1  | 0.4024 | -1.18 | 0.0514 | -1.11 | 0.3207 | 1.41  | 0.1098 |
| 101436_at   | 1418652_at   | Cxcl9        | chemokine (C-X-C motif) ligand 9               | -1.42 | 0.3  | 2.94  | 0.361  | -1.86 | 0.1147 | 2.24  | 0.2979 | 1.04  | 0.9288 |
| 101437_at   | 1449336_a_at | Slk          | STE20-like kinase (yeast)                      | 1.21  | 0.73 | -1.02 | 0.7853 | 1.02  | 0.8848 | -1.11 | 0.2428 | 1.37  | 0.532  |
| 101439_at   | 1417331_a_at | Arl6         | ADP-ribosylation factor-like 6                 | 1.18  | 0.6  | -1.05 | 0.7157 | -1.03 | 0.7506 | 1.09  | 0.3932 | -1.35 | 0.231  |
| 101440_at   | 1453025_at   | 2610107G07Ri | RIKEN cDNA 2610107G07 gene                     | -1.31 | 0.16 | -1.4  | 0.0001 | -1.14 | 0.0419 | -1.55 | 0.0001 | -1.26 | 0.1346 |
| 101442_f_at | 1427287_s_at | Itpr2        | inositol 1,4,5-triphosphate receptor 2         | -1.15 | 0.49 | 1.1   | 0.389  | 1.25  | 0.0428 | 1.24  | 0.051  | 1.36  | 0.2718 |
| 101444_at   | 1417684_at   | Thumpd3      | THUMP domain containing 3                      | 1.35  | 0.13 | 1.1   | 0.1041 | 1.13  | 0.0202 | 1.16  | 0.0385 | -1.16 | 0.2822 |
| 101445_at   | 1422946_a_at | Dnmt1        | DNA methyltransferase (cytosine-5) 1           | -1.32 | 0.32 | 1.12  | 0.3617 | 1.04  | 0.7137 | 1.12  | 0.2921 | 2.1   | 0.1598 |
| 101446_at   | 1418412_at   | Tpd52l1      | tumor protein D52-like 1                       | 1.55  | 0.06 | 1.23  | 0.0127 | 1.21  | 0.1038 | 1.34  | 0.0088 | -1.06 | 0.5493 |
| 101447_at   | 1450056_at   | Apc          | adenomatosis polyposis coli                    | -1.25 | 0.68 | -1    | 0.9822 | 1.01  | 0.8847 | -1.09 | 0.2155 | 1.26  | 0.3547 |
| 101448_at   | 1416540_at   | Hgs          | HGF-regulated tyrosine kinase substrate        | -1.2  | 0.09 | -1.04 | 0.556  | -1.01 | 0.8517 | 1.01  | 0.843  | 1.16  | 0.085  |
| 101449_at   | 1424275_s_at | Trim41       | tripartite motif-containing 41                 | 2.45  | 0.01 | 1.17  | 0.074  | -1.05 | 0.6006 | 1.25  | 0.0078 | -1.18 | 0.6907 |
| 101450_at   | 1460220_a_at | Csf1         | colony stimulating factor 1 (macrophage)       | 1.15  | 0.67 | -1.08 | 0.4199 | -1.31 | 0.032  | -1.08 | 0.627  | 1.16  | 0.7347 |
| 101451_at   | 1417355_at   | Peg3         | paternally expressed 3                         | 1.51  | 0.27 | -1.29 | 0.1746 | 1.07  | 0.647  | -1.45 | 0.0132 | -1.09 | 0.7769 |
| 101453_at   | 1419608_a_at | Mia1         | melanoma inhibitory activity 1                 | -1.65 | 0.02 | -1.19 | 0.2196 | -1.06 | 0.6859 | -1.12 | 0.3752 | 1.53  | 0.1632 |
| 101457_at   | 1421066_at   | Jak2         | Janus kinase 2                                 | -1.1  | 0.54 | 1.23  | 0.0697 | 1.16  | 0.1217 | 1.22  | 0.0602 | 1.18  | 0.3135 |
| 101458_at   | 1416773_at   | Wee1         | wee 1 homolog (S. pombe)                       | 1.62  | 0.4  | 1.47  | 0.006  | 1.32  | 0.015  | 1.28  | 0.0901 | 2.01  | 0.1319 |
| 101459_at   | 1450077_at   | Chd1         | chromodomain helicase DNA binding protei       | 1.32  | 0.39 | 1.27  | 0.0087 | 1.53  | 0.0002 | 1.16  | 0.1484 | 1.32  | 0.0549 |
| 101462_r_at | 1452083_a_at | Pja1         | praja1, RING-H2 motif containing               | -1.36 | 0.16 | 1.18  | 0.3022 | 1.32  | 0.1641 | 1.14  | 0.2694 | -1.03 | 0.9293 |
| 101463_at   | 1418708_at   | Apoc4        | apolipoprotein C-IV                            | -1.19 | 0.62 | 1.05  | 0.3604 | 1.09  | 0.077  | 1.07  | 0.1926 | 1.21  | 0.0967 |
| 101464_at   | 1460227_at   | Timp1        | tissue inhibitor of metalloproteinase 1        | -1.62 | 0.14 | -1.36 | 0.09   | -1.06 | 0.677  | -1.11 | 0.4864 | -1.33 | 0.1712 |
| 101465_at   | 1450034_at   | Stat1        | signal transducer and activator of transcripti | 1.62  | 0.15 | 1.76  | 0.3209 | -1.55 | 0.0811 | 1.78  | 0.3045 | 1.02  | 0.9371 |
| 101466_at   | 1448896_at   | Pigf         | phosphatidylinositol glycan, class F           | -1.01 | 0.99 | -1.08 | 0.4315 | 1.35  | 0.2097 | -1.01 | 0.9204 | 1.26  | 0.1734 |
| 101467_at   | 1434342_at   | ---          | ---                                            | -2.69 | 0.28 | 1.06  | 0.7345 | -1.07 | 0.7132 | -1.13 | 0.6006 | 1.83  | 0.212  |
| 101468_at   | 1452279_at   | Pfc          | properdin factor, complement                   | 1.69  | 0.06 | 1.26  | 0.339  | -1.03 | 0.756  | 1.39  | 0.3349 | 1.07  | 0.7697 |
| 101469_at   | 1422818_at   | Nedd9        | neural precursor cell expressed, developme     | -1.43 | 0.32 | 1.33  | 0.1506 | 1.08  | 0.7469 | 1.57  | 0.03   | 1.6   | 0.2277 |
| 101470_at   | 1434793_at   | BC028975     | cDNA sequence BC028975                         | -2.03 | 0.05 | -1.01 | 0.9227 | -1.01 | 0.9134 | -1.17 | 0.2019 | 1.39  | 0.1536 |
| 101471_at   | 1438711_at   | ---          | ---                                            | -2.77 | 0.05 | -1.7  | 0.0028 | -1.26 | 0.1101 | -2.47 | 0.0001 | -2.43 | 0.0017 |
| 101472_s_at | 1421259_at   | Pklr         | pyruvate kinase liver and red blood cell       | -1.76 | 0.34 | -1.55 | 0.0012 | -1.38 | 0.0721 | -1.97 | 0      | -2.97 | 0.0692 |
| 101473_at   | 1432517_a_at | Nnmt         | nicotinamide N-methyltransferase               | 2.64  | 0.25 | -1.57 | 0.0006 | -2.2  | 0.0017 | -2.13 | 0      | -1.22 | 0.5081 |
| 101474_at   | 1419578_at   | Mbl1         | mannose binding lectin, liver (A)              | -1.27 | 0.29 | -1.54 | 0      | -1.32 | 0      | -1.89 | 0      | -2.87 | 0.0119 |
| 101475_at   | 1448733_at   | Bmi1         | B lymphoma Mo-MLV insertion region 1           | 1     | 0.99 | 1.19  | 0.1779 | 1.08  | 0.6332 | 1.14  | 0.2473 | 1.37  | 0.2425 |
| 101476_at   | 1415728_at   | Pabpn1       | poly(A) binding protein, nuclear 1             | -1.58 | 0.07 | 1     | 0.9727 | 1.04  | 0.7094 | 1.04  | 0.6378 | 1.23  | 0.1168 |
| 101480_at   | 1416870_at   | Dnalc4       | dynein, axonemal, light chain 4                | -1.11 | 0.78 | 1.08  | 0.6678 | -1.17 | 0.348  | 1.08  | 0.532  | -1.15 | 0.6737 |
| 101481_at   | 1415791_at   | Rnf34        | ring finger protein 34                         | -1.06 | 0.87 | 1.12  | 0.3824 | 1.13  | 0.3148 | 1.17  | 0.2194 | -1.43 | 0.3624 |
| 101482_at   | 1450149_a_at | Ppp1cc       | protein phosphatase 1, catalytic subunit, gar  | 1.24  | 0.05 | 1.15  | 0.006  | -1.02 | 0.7081 | 1.08  | 0.0255 | 1.16  | 0.1833 |

|             |              |                 |                                                   |       |      |       |        |       |        |       |        |        |        |
|-------------|--------------|-----------------|---------------------------------------------------|-------|------|-------|--------|-------|--------|-------|--------|--------|--------|
| 101483_at   | 1420745_a_at | Ccndbp1         | cyclin D-type binding-protein 1                   | -1.09 | 0.65 | 1.03  | 0.4814 | 1.07  | 0.1832 | 1.13  | 0.0016 | -1.11  | 0.5513 |
| 101484_at   | 1448343_a_at | Nbr1            | neighbor of Brca1 gene 1                          | 1.8   | 0.04 | 1.16  | 0.0143 | 1.21  | 0.0032 | 1.27  | 0.0059 | -1.02  | 0.8097 |
| 101485_at   | 1417242_at   | Ddx48           | DEAD (Asp-Glu-Ala-Asp) box polypeptide 4f         | 1.53  | 0.03 | 1.01  | 0.8719 | 1.08  | 0.1618 | 1.08  | 0.1723 | 1.06   | 0.5559 |
| 101486_at   | 1448632_at   | Psmb10          | proteasome (prosome, macropain) subunit, l        | 1.14  | 0.49 | 1.22  | 0.492  | -1.13 | 0.17   | 1.53  | 0.1555 | -1.08  | 0.6707 |
| 101489_at   | 1448484_at   | Amd1            | S-adenosylmethionine decarboxylase 1              | 1.07  | 0.8  | 1.11  | 0.2207 | 1.33  | 0.0012 | 1.02  | 0.7779 | -1.11  | 0.3676 |
| 101490_at   | 1423651_at   | Hbld2           | HESB like domain containing 2                     | 1.35  | 0.18 | 1.02  | 0.8906 | 1.22  | 0.2195 | 1.13  | 0.3776 | 1.16   | 0.4208 |
| 101492_at   | 1416228_at   | Pin1            | protein (peptidyl-prolyl cis/trans isomerase) l   | 2.25  | 0.21 | 1.33  | 0.0774 | 1.12  | 0.5513 | 1.3   | 0.0376 | -2.37  | 0.1928 |
| 101495_at   | 1416330_at   | Cd81            | CD 81 antigen                                     | -1.03 | 0.72 | -1.28 | 0.0043 | -1.29 | 0.0017 | -1.35 | 0      | -1.15  | 0.1391 |
| 101498_at   | 1436848_x_at | Impa1           | inositol (myo)-1(or 4)-monophosphatase 1          | -1.11 | 0.5  | -1.14 | 0.3338 | -1.16 | 0.4072 | -1.25 | 0.065  | -2.58  | 0.0008 |
| 101499_at   | 1449942_a_at | Ilk             | integrin linked kinase                            | 1.33  | 0.02 | -1.05 | 0.4039 | 1.04  | 0.4766 | 1.07  | 0.3364 | -1.06  | 0.5887 |
| 101500_at   | 1433490_s_at | Epb4.1l2        | erythrocyte protein band 4.1-like 2               | -1.01 | 0.96 | 1.12  | 0.2548 | 1.18  | 0.1092 | 1.27  | 0.0243 | 2.33   | 0.0151 |
| 101501_r_at | 1415911_at   | Impact          | imprinted and ancient                             | -1.06 | 0.9  | 1.59  | 0.0569 | 1.33  | 0.0387 | 1.34  | 0.1939 | 1.24   | 0.5919 |
| 101502_at   | 1422286_a_at | Tgfr            | TG interacting factor                             | -1.31 | 0.42 | 1.56  | 0.0397 | 1.09  | 0.5655 | 1.6   | 0.0632 | 1.07   | 0.6985 |
| 101505_at   | 1426644_at   | Tbc1d20         | TBC1 domain family, member 20                     | 1.41  | 0.02 | 1.2   | 0.0056 | 1.28  | 0.086  | 1.4   | 0.0006 | 1.15   | 0.5472 |
| 101506_at   | 1417353_x_at | Snrpa1          | small nuclear ribonucleoprotein polypeptide       | 1.42  | 0.27 | 1.07  | 0.5386 | 1.18  | 0.063  | 1.31  | 0.0145 | -1.18  | 0.2242 |
| 101507_at   | 1428364_at   | Scnm1           | sodium channel modifier 1                         | 6.86  | 0.04 | 1.31  | 0.0636 | 1.39  | 0.0263 | 1.47  | 0.0005 | 1.46   | 0.2326 |
| 101509_at   | 1421750_a_at | Vbp1            | von Hippel-Lindau binding protein 1               | 1.4   | 0.22 | 1.28  | 0.0053 | 1.37  | 0.095  | 1.35  | 0.0051 | 1.23   | 0.37   |
| 101510_at   | 1417056_at   | Psme1           | proteasome (prosome, macropain) 28 subur          | 2.03  | 0.08 | 1.39  | 0.2485 | 1.1   | 0.4362 | 1.65  | 0.059  | -1.23  | 0.1199 |
| 101513_at   | 1438358_x_at | Pfdn5 /// LOC43 | prefoldin 5 /// similar to prefoldin 5; EIG-1; c- | -1.59 | 0.02 | -1.2  | 0.161  | 1.01  | 0.9513 | -1.39 | 0.0076 | 1.1    | 0.4317 |
| 101514_at   | 1416771_at   | Trappc3         | trafficking protein particle complex 3            | -1.22 | 0.52 | 1.06  | 0.1942 | -1.1  | 0.2634 | -1.06 | 0.5132 | -1.07  | 0.6086 |
| 101515_at   | 1416408_at   | Acox1           | acyl-Coenzyme A oxidase 1, palmitoyl              | 1.13  | 0.61 | 1.19  | 0.0457 | -1.09 | 0.146  | 1.19  | 0.0913 | -1.36  | 0.1097 |
| 101517_at   | 1450965_at   | Tex261          | testis expressed gene 261                         | -1.2  | 0.09 | -1.06 | 0.5322 | -1.37 | 0.0069 | -1.26 | 0.0262 | 1.12   | 0.2572 |
| 101518_at   | 1451412_a_at | 0610009H04Rik   | RIKEN cDNA 0610009H04 gene                        | 1.22  | 0.16 | -1.04 | 0.4998 | 1.13  | 0.4207 | 1.06  | 0.5843 | -1.01  | 0.9473 |
| 101519_at   | 1418568_x_at | Srp14           | signal recognition particle 14                    | 1.05  | 0.81 | 1.13  | 0.0641 | 1.02  | 0.7893 | 1.05  | 0.6104 | -1.23  | 0.0106 |
| 101520_at   | 1418651_at   | Spata6          | spermatogenesis associated 6                      | -1.19 | 0.07 | 1.12  | 0.5616 | 1.09  | 0.3278 | -1.03 | 0.7372 | 1.62   | 0.0094 |
| 101521_at   | 1424278_a_at | Birc5           | baculoviral IAP repeat-containing 5               | 3.42  | 0.11 | 1.31  | 0.355  | 1.09  | 0.7925 | 1.6   | 0.088  | 2.21   | 0.0075 |
| 101522_at   | 1448069_at   | Tm4sf1          | transmembrane 4 superfamily member 1              | -1.44 | 0.57 | -1.2  | 0.2328 | 1     | 0.9858 | -1.06 | 0.6584 | 1.72   | 0.0535 |
| 101523_at   | 1428262_s_at | Hnrpa3          | heterogeneous nuclear ribonucleoprotein A3        | 1.19  | 0.26 | 1.08  | 0.4007 | 1.08  | 0.1591 | 1.1   | 0.1886 | 1.38   | 0.0886 |
| 101525_at   | 1428322_a_at | Ndufb10         | NADH dehydrogenase (ubiquinone) 1 beta s          | 1.74  | 0.05 | 1.11  | 0.1295 | 1.17  | 0.0025 | 1.11  | 0.2142 | 1.12   | 0.2295 |
| 101526_at   | 1448601_s_at | Msx1            | homeo box, msh-like 1                             | -2.14 | 0.03 | -1.09 | 0.7365 | -1.28 | 0.3885 | 1.05  | 0.8259 | 1.33   | 0.2169 |
| 101527_at   | 1419258_at   | Tcea1           | transcription elongation factor A (SII) 1         | 1.2   | 0.42 | 1.03  | 0.4598 | -1    | 0.9528 | -1.01 | 0.8634 | -1.1   | 0.3939 |
| 101530_at   | 1438835_a_at | MGI:1336880     | U5 small nuclear ribonucleoprotein                | 1.77  | 0.09 | -1    | 0.9705 | -1.07 | 0.3229 | 1.03  | 0.5699 | -1.28  | 0.3451 |
| 101534_at   | 1422419_s_at | Tnp2            | transition protein 2                              | -1.24 | 0.37 | 1.07  | 0.6877 | -1.11 | 0.4577 | -1.29 | 0.1013 | 2.29   | 0.0536 |
| 101536_at   | 1423200_at   | Ncor1           | nuclear receptor co-repressor 1                   | 1.12  | 0.61 | 1.06  | 0.355  | 1.15  | 0.1383 | 1.07  | 0.3449 | 1.18   | 0.16   |
| 101537_at   | 1416913_at   | Es1             | esterase 1                                        | -1.16 | 0.18 | -1.19 | 0.0443 | -1.05 | 0.5062 | -1.48 | 0.0009 | -1.1   | 0.5828 |
| 101539_f_at | 1435371_x_at | Ces3            | carboxylesterase 3                                | 1.22  | 0.58 | 1.21  | 0.1284 | 1.1   | 0.1884 | 1.14  | 0.2948 | 1.61   | 0.0075 |
| 101540_at   | 1448462_at   | Tdg             | thymine DNA glycosylase                           | 1.05  | 0.75 | -1.05 | 0.4307 | 1.09  | 0.1387 | -1.01 | 0.8726 | -1.1   | 0.6176 |
| 101541_at   | 1456474_at   | ---             | ---                                               | -1.19 | 0.58 | 1.05  | 0.785  | 1.4   | 0.0998 | 1.24  | 0.2841 | 1.71   | 0.1258 |
| 101542_f_at | 1423043_s_at | Ddx3x /// Fin14 | DEAD/H (Asp-Glu-Ala-Asp/His) box polypep          | 1.58  | 0.44 | 1.29  | 0.1051 | -1.48 | 0.0623 | -1.21 | 0.3118 | 1.05   | 0.6459 |
| 101551_s_at | 1460378_a_at | Tes             | testis derived transcript                         | -1.56 | 0.22 | -1.25 | 0.5578 | 1.07  | 0.8565 | 1.37  | 0.3599 | 1.47   | 0.5291 |
| 101552_at   | 1423279_at   | Slc34a1         | solute carrier family 34 (sodium phosphate),      | -1.21 | 0.08 | 1.1   | 0.3331 | 1.12  | 0.4361 | -1.12 | 0.3839 | -1.02  | 0.9544 |
| 101553_at   | 1424279_at   | Fga             | fibrinogen, alpha polypeptide                     | -2.01 | 0.04 | 1.11  | 0.5093 | -1.05 | 0.7364 | 1.04  | 0.7373 | 1.25   | 0.0246 |
| 101554_at   | 1448306_at   | Nfkbia          | nuclear factor of kappa light chain gene enh      | 1.11  | 0.59 | 1.27  | 0.0026 | 1.21  | 0.0556 | 1.44  | 0.0021 | 1.24   | 0.3734 |
| 101555_at   | 1451086_s_at | Rac1            | RAS-related C3 botulinum substrate 1              | -1.38 | 0.05 | 1.1   | 0.0852 | 1.05  | 0.3808 | 1.08  | 0.1697 | 1.13   | 0.5069 |
| 101557_at   | 1460644_at   | Bckdk           | branched chain ketoacid dehydrogenase kin         | -1.02 | 0.9  | -1.04 | 0.6535 | -1.01 | 0.9491 | -1.05 | 0.4558 | 1.11   | 0.229  |
| 101558_s_at | 1415676_a_at | Psmb5           | proteasome (prosome, macropain) subunit, l        | 1.57  | 0.19 | 1.07  | 0.1196 | 1.09  | 0.1595 | 1.22  | 0.0002 | -1.58  | 0.0121 |
| 101560_at   | 1415856_at   | Emb             | embigin                                           | 2.97  | 0.02 | 1.2   | 0.5841 | 1.14  | 0.583  | 1.49  | 0.2195 | -1.04  | 0.911  |
| 101561_at   | 1428942_at   | Mt2             | metallothionein 2                                 | 6.83  | 0.03 | 1.49  | 0.0218 | -1.93 | 0.0206 | -1.1  | 0.4475 | 2.1    | 0.0401 |
| 101562_at   | 1448586_at   | Hspa14          | heat shock 70kDa protein 14                       | 1.07  | 0.81 | -1.09 | 0.5095 | 1.07  | 0.5673 | 1.14  | 0.1949 | -1.87  | 0.1362 |
| 101564_at   | 1460665_a_at | Cnot7           | CCR4-NOT transcription complex, subunit 7         | 1.37  | 0.45 | -1.1  | 0.3449 | -1    | 0.9739 | -1.09 | 0.4446 | -1.13  | 0.615  |
| 101565_f_at | 1448680_at   | Serpina1a       | serine (or cysteine) proteinase inhibitor, clac   | -1.4  | 0.2  | -1.01 | 0.7965 | -1.02 | 0.4818 | -1.02 | 0.5619 | 1.37   | 0.0308 |
| 101566_f_at | 1420465_s_at | Mup1 /// Mup2   | major urinary protein 1 /// major urinary prote   | -2.2  | 0.04 | -4.59 | 0      | -1.23 | 0.0016 | -8.46 | 0      | -33.45 | 0      |
| 101568_at   | 1423044_at   | Prosc           | proline synthetase co-transcribed                 | 1.74  | 0.02 | 1.35  | 0      | 1.02  | 0.7147 | 1.27  | 0.0018 | 1.43   | 0.0094 |



|             |              |                  |                                                 |       |      |       |        |       |        |       |        |        |        |
|-------------|--------------|------------------|-------------------------------------------------|-------|------|-------|--------|-------|--------|-------|--------|--------|--------|
| 101569_at   | 1448457_at   | Krt2-6g          | keratin complex 2, basic, gene 6g               | -1.1  | 0.88 | 1.01  | 0.94   | -1.01 | 0.9655 | -1.15 | 0.3679 | -1.04  | 0.8658 |
| 101571_g_at | 1423756_s_at | Igf1bp4          | insulin-like growth factor binding protein 4    | -1.16 | 0.61 | -1.14 | 0.0609 | -1.18 | 0.1662 | -1.24 | 0.0022 | 1.01   | 0.9584 |
| 101572_f_at | 1420553_x_at | Serpina1a        | serine (or cysteine) proteinase inhibitor, clac | -1.17 | 0.27 | 1.01  | 0.7792 | 1     | 0.9932 | -1.01 | 0.7504 | 1.13   | 0.1557 |
| 101576_f_at | 1451513_x_at | Serpina1b        | serine (or cysteine) proteinase inhibitor, clac | -1.2  | 0.44 | -1.03 | 0.1713 | -1.01 | 0.5804 | -1.02 | 0.3605 | 1.33   | 0.0449 |
| 101577_at   | 1434377_x_at | Rps6             | ribosomal protein S6                            | 1.48  | 0.21 | 1.03  | 0.5688 | 1.16  | 0.0846 | 1.17  | 0.0053 | 1.43   | 0.0438 |
| 101579_at   | 1448753_at   | ---              | ---                                             | 1.21  | 0.35 | 1.01  | 0.9225 | -1.04 | 0.7167 | -1.14 | 0.1118 | -1.19  | 0.2276 |
| 101581_at   | 1416680_at   | Ube3a            | ubiquitin protein ligase E3A                    | 1.2   | 0.56 | 1.12  | 0.4125 | -1.07 | 0.7107 | 1.11  | 0.5904 | -1.16  | 0.4182 |
| 101582_at   | 1426579_at   | Gnl2             | guanine nucleotide binding protein-like 2 (nu   | 7.52  | 0.09 | 2.88  | 0.0049 | 2.59  | 0.0018 | 3.34  | 0      | 2.2    | 0.0672 |
| 101583_at   | 1448272_at   | Btg2             | B-cell translocation gene 2, anti-proliferative | 1.17  | 0.6  | 1.56  | 0.0245 | -1.28 | 0.2356 | 1.69  | 0.0129 | 3.89   | 0      |
| 101584_at   | 1419259_at   | ---              | ---                                             | 1.01  | 0.95 | -1.02 | 0.6834 | 1     | 0.9602 | 1     | 0.9948 | -1.18  | 0.231  |
| 101585_at   | 1423451_at   | Pgrmc1           | progesterone receptor membrane componen         | 1.16  | 0.65 | 1     | 0.9502 | 1.01  | 0.8072 | -1.05 | 0.3226 | -1.35  | 0.0046 |
| 101587_at   | 1422438_at   | Ephx1            | epoxide hydrolase 1, microsomal                 | 1.28  | 0.54 | 1.48  | 0      | 1.43  | 0      | 1.51  | 0.0006 | -1.57  | 0.0315 |
| 101588_at   | 1415802_at   | Slc16a1          | solute carrier family 16 (monocarboxylic acic   | -1.1  | 0.39 | -1.05 | 0.6974 | 1.45  | 0.0583 | 1.07  | 0.5956 | 1.17   | 0.6644 |
| 101589_at   | 1433507_a_at | Hmgn2            | high mobility group nucleosomal binding dor     | 1.12  | 0.68 | -1.02 | 0.831  | -1.17 | 0.242  | 1.06  | 0.4632 | 1.01   | 0.9665 |
| 101590_at   | 1428094_at   | Lamp2            | lysosomal membrane glycoprotein 2               | -1.37 | 0.3  | -1.08 | 0.0717 | -1.06 | 0.1994 | -1.18 | 0.0067 | -1.48  | 0.0039 |
| 101591_at   | 1422443_at   | Xpnp1            | X-prolyl aminopeptidase (aminopeptidase P,      | -1.13 | 0.55 | -1.12 | 0.0704 | -1.03 | 0.4274 | -1.05 | 0.2387 | -1.28  | 0.0132 |
| 101593_at   | 1417311_at   | Crip2            | cysteine rich protein 2                         | 1.66  | 0.15 | -1.06 | 0.6056 | 1.02  | 0.8032 | -1.14 | 0.1708 | -1.16  | 0.3934 |
| 101595_at   | 1448064_at   | ---              | ---                                             | -1.06 | 0.83 | -1.13 | 0.15   | -1.04 | 0.7351 | -1.21 | 0.0628 | -1.1   | 0.622  |
| 101596_at   | 1420048_at   | C78859           | Expressed sequence C78859                       | -1.49 | 0.32 | 1.23  | 0.26   | 1.47  | 0.0791 | 1.95  | 0.0308 | 1.24   | 0.6013 |
| 101597_at   | 1446829_at   | D12Erd216e       | DNA segment, Chr 12, ERATO Doi 216, exp         | 1.22  | 0.67 | 1.27  | 0.2359 | 1.09  | 0.6457 | -1.13 | 0.5182 | 1.04   | 0.7437 |
| 101598_at   | 1458795_at   | ---              | Transcribed locus                               | -1.33 | 0.33 | -1.05 | 0.7563 | 1.04  | 0.8343 | 1.09  | 0.6465 | 1.41   | 0.3184 |
| 101599_at   | 1419940_at   | C030018P15Rik    | RIKEN cDNA C030018P15 gene                      | -1.37 | 0.25 | 1.06  | 0.5722 | 1.19  | 0.3922 | 1.08  | 0.5185 | 1.55   | 0.0112 |
| 101600_at   | 1444887_at   | C79015           | expressed sequence C79015                       | -1.39 | 0.3  | 1.12  | 0.3566 | 1.07  | 0.4409 | -1.06 | 0.6116 | 1.97   | 0.0369 |
| 101601_at   | 1419885_at   | DXErd223e        | DNA segment, Chr X, ERATO Doi 223, expr         | 1.77  | 0.14 | -1.67 | 0.2691 | 1.23  | 0.6583 | -1    | 0.9898 | 1.25   | 0.5651 |
| 101603_g_at | 1457849_at   | 4933430F16Rik    | RIKEN cDNA 4933430F16 gene                      | -1.35 | 0.12 | -1.04 | 0.8062 | 1.04  | 0.79   | -1.14 | 0.3367 | 1.03   | 0.9269 |
| 101604_at   | 1446379_at   | C79296           | expressed sequence C79296                       | -1.61 | 0.57 | 1.03  | 0.9301 | -1.02 | 0.9598 | -1.23 | 0.6156 | -1.1   | 0.8914 |
| 101605_at   | 1446008_at   | D3Erd246e        | DNA segment, Chr 3, ERATO Doi 246, expr         | -1.62 | 0.23 | 1     | 0.9918 | 1.01  | 0.9807 | 1     | 0.9973 | 1.58   | 0.2967 |
| 101606_at   | 1459085_at   | D1Erd259e        | DNA segment, Chr 1, ERATO Doi 259, expr         | -1.38 | 0.01 | 1.15  | 0.516  | 1.09  | 0.5892 | -1.3  | 0.1455 | -1.01  | 0.9824 |
| 101607_at   | 1438755_at   | C80068           | expressed sequence C80068                       | -1.15 | 0.41 | 1.1   | 0.1993 | 1.08  | 0.3232 | 1.17  | 0.0294 | 1.41   | 0.0133 |
| 101608_at   | 1458041_at   | C80360           | expressed sequence C80360                       | 3.18  | 0.16 | 1.29  | 0.2485 | 1.3   | 0.2708 | 1.4   | 0.0849 | -1.54  | 0.2942 |
| 101609_at   | 1428752_at   | Slc5a11          | solute carrier family 5 (sodium/glucose cotra   | -1.39 | 0.15 | 1     | 0.9769 | 1.07  | 0.4106 | -1.07 | 0.4734 | 1.2    | 0.3094 |
| 101610_at   | 1449685_s_at | 4933425A18Rik    | RIKEN cDNA 4933425A18 gene                      | -1.61 | 0.36 | -1.03 | 0.849  | 1.2   | 0.478  | 1.36  | 0.4002 | 1.76   | 0.046  |
| 101611_at   | 1420173_at   | D11Erd326e       | DNA segment, Chr 11, ERATO Doi 326, exp         | -1.24 | 0.48 | -1.06 | 0.6798 | 1.02  | 0.9226 | -1.04 | 0.8465 | 1.15   | 0.7595 |
| 101612_at   | 1460264_at   | C81600           | expressed sequence C81600                       | -1.52 | 0.2  | 1.34  | 0.3037 | 1.28  | 0.3703 | 1.12  | 0.6915 | 1.43   | 0.4948 |
| 101614_at   | 1419890_at   | ---              | ---                                             | -1.62 | 0.22 | -1.34 | 0.2139 | -1.35 | 0.1116 | -1.3  | 0.1155 | 1.68   | 0.1529 |
| 101615_at   | 1420149_at   | ---              | ---                                             | 1.05  | 0.88 | -1.02 | 0.9033 | 1.3   | 0.3881 | -1.22 | 0.0304 | 1.17   | 0.5912 |
| 101619_at   | 1450593_at   | Ilna6            | interferon alpha family, gene 6                 | -2.72 | 0.34 | 1.12  | 0.3385 | -1.05 | 0.7008 | 1.09  | 0.4886 | 1.24   | 0.3832 |
| 101620_at   | 1422316_at   | Gp1ba            | glycoprotein 1b, alpha polypeptide              | -3.76 | 0.37 | 1.02  | 0.8848 | 1     | 0.9863 | -1.4  | 0.0249 | 1.12   | 0.8135 |
| 101621_at   | 1421803_at   | Apbh             | androgen-binding protein eta                    | -1.27 | 0.49 | -1.05 | 0.4667 | -1.18 | 0.0088 | -1.13 | 0.0247 | 1.69   | 0.062  |
| 101622_at   | 1421737_at   | Alx4             | aristaless 4                                    | -2.37 | 0.21 | 1.23  | 0.2697 | 1.46  | 0.0461 | 1.22  | 0.2918 | 1.09   | 0.5909 |
| 101623_at   | 1420445_at   | Slc16a8          | solute carrier family 16 (monocarboxylic acic   | -1.36 | 0.53 | -1.03 | 0.8886 | 1.26  | 0.5587 | -1.1  | 0.7289 | 1.17   | 0.6    |
| 101624_at   | 1421518_at   | Kcns1            | K+ voltage-gated channel, subfamily S, 1        | -1.23 | 0.83 | 1.76  | 0.1865 | 1.86  | 0.0406 | 2.15  | 0.0698 | 1.55   | 0.4928 |
| 101625_at   | 1421342_at   | Kcns2            | K+ voltage-gated channel, subfamily S, 2        | -1.09 | 0.7  | -1.25 | 0.0652 | -1.12 | 0.2864 | -1.21 | 0.2228 | -1.21  | 0.5323 |
| 101626_at   | 1420742_at   | Adam7            | a disintegrin and metalloprotease domain 7      | -2.42 | 0.02 | 1.08  | 0.7856 | 1.21  | 0.5012 | -1.07 | 0.813  | 1.34   | 0.3834 |
| 101628_g_at | 1425739_at   | Pld1             | phospholipase D1                                | -1.91 | 0.45 | 1.34  | 0.0603 | 1.26  | 0.1808 | 1.2   | 0.2989 | 1.06   | 0.9149 |
| 101629_s_at | 1421673_s_at | Stx1b2 /// Stx1b | syntaxin 1B2 /// syntaxin 1B1                   | -1.16 | 0.8  | -1.12 | 0.6956 | 2.38  | 0.1063 | -1.04 | 0.8715 | -2.04  | 0.311  |
| 101632_at   | 1419214_at   | Tnfrsf11a        | tumor necrosis factor receptor superfamily, r   | -1.35 | 0.24 | -1.06 | 0.4158 | -1.1  | 0.3747 | -1.13 | 0.108  | 1.68   | 0.0706 |
| 101634_at   | 1432416_a_at | Npm1             | nucleophosmin 1                                 | 1.45  | 0.1  | 1.07  | 0.1171 | 1.16  | 0.1152 | 1.15  | 0.0191 | 1.38   | 0.0872 |
| 101635_f_at | 1426166_at   | Mup5             | major urinary protein 5                         | -2.08 | 0.05 | -5.06 | 0      | -1.28 | 0.0141 | -6.77 | 0      | -10.01 | 0      |
| 101636_at   | 1420466_at   | Spt2             | salivary protein 2                              | 1.85  | 0.03 | 1.31  | 0.362  | 1.47  | 0.1547 | 1.32  | 0.3431 | 1.19   | 0.6927 |
| 101637_at   | 1417074_at   | Ceacam10         | CEA-related cell adhesion molecule 10           | -1.55 | 0.28 | 1.36  | 0.2641 | 1.26  | 0.4571 | -1.1  | 0.7585 | 2.3    | 0.1931 |
| 101639_r_at | 1421741_at   | Cyp3a16          | cytochrome P450, family 3, subfamily a, pol     | -2.3  | 0.03 | -3.76 | 0.0001 | -1.62 | 0.0087 | -3.56 | 0      | 1.27   | 0.3332 |
| 101642_at   | 1427841_at   | ---              | ---                                             | 1.1   | 0.31 | 1.18  | 0.0793 | 1.15  | 0.3121 | 1.05  | 0.3787 | 1.34   | 0.1277 |

|             |              |               |                                                                       |       |      |       |        |       |        |       |        |       |        |
|-------------|--------------|---------------|-----------------------------------------------------------------------|-------|------|-------|--------|-------|--------|-------|--------|-------|--------|
| 101643_at   | 1450349_at   | Stx1b1        | syntaxin 1B1                                                          | 1.13  | 0.84 | 1.21  | 0.1034 | 1.15  | 0.1893 | 1.37  | 0.2458 | 1.49  | 0.3609 |
| 101644_f_at | 1450338_x_at | V2r8 /// V2r9 | vomeronasal 2, receptor, 8 /// vomeronasal 2                          | 2.16  | 0.26 | 1.15  | 0.5603 | 2.02  | 0.2046 | -1.26 | 0.0434 | 1.46  | 0.5633 |
| 101646_at   | 1426056_at   | Pigq          | phosphatidylinositol glycan, class Q                                  | 1.63  | 0.19 | -1.03 | 0.9418 | 1.29  | 0.2568 | 1.31  | 0.2972 | 4.47  | 0.0038 |
| 101647_at   | 1421767_at   | ---           | ---                                                                   | -2.28 | 0.32 | -1.34 | 0.3387 | 1.04  | 0.908  | -1.14 | 0.6194 | 1.05  | 0.4812 |
| 101648_at   | 1422318_at   | Foxd4         | forkhead box D4                                                       | -3.67 | 0.18 | -1.35 | 0.3058 | -1.51 | 0.2173 | -1.3  | 0.4484 | 1.59  | 0.5269 |
| 101649_at   | 1421833_at   | Pip5k1a       | phosphatidylinositol-4-phosphate 5-kinase, type 1                     | -1.54 | 0.15 | 1.18  | 0.3783 | -1.23 | 0.1282 | -1.17 | 0.1991 | 2.52  | 0.1418 |
| 101651_at   | 1419429_at   | Cntrf         | ciliary neurotrophic factor receptor                                  | -1.66 | 0.38 | -1.34 | 0.4404 | -1.27 | 0.4669 | -2.11 | 0.0527 | 1.73  | 0.0128 |
| 101653_f_at | 1422405_at   | H2-D4         | histocompatibility 2, D region locus 4                                | 1.77  | 0.58 | 1.16  | 0.4711 | -1.38 | 0.0698 | 1.44  | 0.1363 | -1.74 | 0.0475 |
| 101655_at   | 1419521_at   | Zfp94         | zinc finger protein 94                                                | 1.1   | 0.64 | 1     | 0.9735 | 1.05  | 0.7702 | -1.12 | 0.5767 | -1    | 1      |
| 101657_at   | 1450342_at   | Bmp8b         | bone morphogenetic protein 8b                                         | -1.77 | 0.38 | 1.03  | 0.8475 | -1.16 | 0.3475 | 1.03  | 0.8313 | -1.03 | 0.8874 |
| 101659_at   | 1425127_at   | Hsd3b2        | hydroxysteroid dehydrogenase-2, delta<5>-;                            | -1.78 | 0.06 | -1.23 | 0.1941 | 1.11  | 0.484  | -1.1  | 0.4479 | -1.77 | 0.0017 |
| 101661_r_at | 1420290_at   | ---           | Transcribed locus                                                     | -2.27 | 0.08 | -1.01 | 0.9275 | -1.12 | 0.5744 | -1.37 | 0.1186 | 1.55  | 0.1071 |
| 101663_s_at | 1420001_at   | D7Erd1e       | DNA segment, Chr 7, ERATO Doi 1, expressed                            | 2.14  | 0.24 | 1.25  | 0.4074 | 1.26  | 0.1038 | -1.06 | 0.6999 | 1.16  | 0.5593 |
| 101664_at   | 1422475_a_at | Rps3a         | ribosomal protein S3a                                                 | 1.35  | 0.26 | 1.07  | 0.0103 | 1.11  | 0.0692 | 1.08  | 0.0559 | 1.32  | 0.0706 |
| 101665_at   | 1418315_at   | Nr5a1         | nuclear receptor subfamily 5, group A, member 1                       | -1.4  | 0    | -1.12 | 0.019  | -1.17 | 0.0005 | -1.21 | 0.0008 | 1.13  | 0.3763 |
| 101666_at   | 1421730_at   | Nr5a1         | nuclear receptor subfamily 5, group A, member 1                       | -4.28 | 0.06 | 1.43  | 0.0076 | 1.3   | 0.0247 | 1.4   | 0.0333 | 1.28  | 0.4436 |
| 101668_at   | 1449761_at   | AA589418      | expressed sequence AA589418                                           | -1.45 | 0.01 | -1.03 | 0.8172 | 1.03  | 0.699  | -1.09 | 0.5273 | 1.15  | 0.6006 |
| 101671_at   | 1420084_at   | ---           | Transcribed locus                                                     | -1.53 | 0.66 | 1.2   | 0.5004 | 1.5   | 0.2081 | 1.32  | 0.1984 | -1.04 | 0.9116 |
| 101676_at   | 1449106_at   | Gpx3          | glutathione peroxidase 3                                              | -1.16 | 0.8  | -1.55 | 0.0342 | -1.15 | 0.2244 | -1.32 | 0.0674 | 2.31  | 0.0381 |
| 101677_at   | 1453827_at   | 1110035H17Rik | RIKEN cDNA 1110035H17 gene                                            | -1.23 | 0.23 | -1.14 | 0.0164 | -1.05 | 0.6056 | -1.11 | 0.1406 | 1.11  | 0.3331 |
| 101679_at   | 1419723_at   | Opn1mw        | opsin 1 (cone pigments), medium-wave-sensitive                        | -1.77 | 0.03 | 1     | 0.9649 | -1.04 | 0.6722 | -1.12 | 0.354  | 1.26  | 0.1035 |
| 101680_at   | 1426661_at   | Rpl27a        | ribosomal protein L27a                                                | -1.31 | 0.05 | -1.04 | 0.5769 | 1.19  | 0.0177 | 1.08  | 0.1585 | 1.51  | 0.134  |
| 101681_f_at | 1450531_at   | H2-BI         | histocompatibility 2, blastocyst                                      | -1.23 | 0.34 | -1.13 | 0.1162 | -1.18 | 0.0583 | -1.18 | 0.0082 | -1.1  | 0.3586 |
| 101682_f_at | 1420793_at   | Mup4          | major urinary protein 4                                               | -2.73 | 0.04 | -3.7  | 0      | -1.2  | 0.0936 | -4.2  | 0      | -9.72 | 0      |
| 101688_at   | 1448089_at   | D4Erd58e      | DNA segment, Chr 4, ERATO Doi 58, expressed                           | -1.05 | 0.89 | -1.06 | 0.6646 | -1.13 | 0.4226 | -1.24 | 0.1406 | 1.85  | 0.2834 |
| 101689_at   | 1419831_at   | AA416453      | expressed sequence AA416453                                           | -1.07 | 0.82 | -1.47 | 0.308  | -1.48 | 0.3056 | -1.23 | 0.5464 | 1.15  | 0.7701 |
| 101691_s_at | 1448093_s_at | C77405        | expressed sequence C77405                                             | -1.58 | 0.58 | -1.7  | 0.0622 | -1.16 | 0.6123 | -1.74 | 0.0584 | -2.11 | 0.1656 |
| 101693_f_at | 1447997_s_at | LOC223262     | similar to small zinc finger-like protein                             | -2.9  | 0.12 | 1.45  | 0.0052 | 1.52  | 0.2734 | 1.26  | 0.2484 | 1.75  | 0.0023 |
| 101694_f_at | 1447631_at   | Myst2         | MYST histone acetyltransferase 2                                      | -1.1  | 0.76 | 1.01  | 0.9236 | -1.03 | 0.7568 | -1.06 | 0.644  | -1.01 | 0.966  |
| 101695_at   | 1419822_at   | Eif3s6        | Eukaryotic translation initiation factor 3, subunit 6                 | -2.05 | 0.4  | -1.43 | 0.128  | 1.05  | 0.8636 | -1.24 | 0.3641 | 1.58  | 0.2972 |
| 101696_r_at | 1419881_x_at | ---           | ---                                                                   | -1.34 | 0.23 | 1.02  | 0.8602 | -1.02 | 0.8711 | 1.19  | 0.0063 | 1.58  | 0.4644 |
| 101699_at   | 1422287_at   | Phxr2         | per-hexamer repeat gene 2                                             | -4.28 | 0.4  | -1.01 | 0.9623 | -1.63 | 0.0766 | -1.17 | 0.5391 | -1.32 | 0.62   |
| 101700_at   | 1422272_at   | Phxr4         | per-hexamer repeat gene 4                                             | -1.32 | 0.36 | -1.07 | 0.4254 | -1.29 | 0.076  | -1.17 | 0.171  | 1.16  | 0.4834 |
| 101701_at   | 1422052_at   | Cdh8          | cadherin 8                                                            | -1.77 | 0.57 | -1.24 | 0.6319 | -1.35 | 0.4954 | -1.95 | 0.2064 | -2.05 | 0.1622 |
| 101702_at   | 1421085_at   | Rs1h          | retinoschisin 1 homolog (human)                                       | -1.23 | 0.2  | 1.34  | 0.01   | 1.24  | 0.0917 | 1.29  | 0.0375 | 1.36  | 0.5403 |
| 101704_at   | 1450518_at   | Hnf4g         | hepatocyte nuclear factor 4, gamma                                    | -2.66 | 0.2  | 1.6   | 0.0598 | 1.7   | 0.0525 | 1.41  | 0.4381 | 1.14  | 0.8075 |
| 101705_at   | 1421800_at   | Phxr1         | per-hexamer repeat gene 1                                             | -1.88 | 0.49 | -1.18 | 0.631  | -1.37 | 0.3545 | -1.75 | 0.1404 | 1.56  | 0.1823 |
| 101708_at   | 1421618_at   | Myo1f         | myosin IF                                                             | -1.07 | 0.81 | 1.4   | 0.1787 | 1.06  | 0.7435 | 1.82  | 0.0801 | 1.44  | 0.2627 |
| 101709_at   | 1420796_at   | Ahr           | aryl-hydrocarbon receptor repressor                                   | 1.41  | 0.52 | -1    | 0.9919 | 1.02  | 0.9101 | 1.01  | 0.9452 | 1.56  | 0.1678 |
| 101710_at   | 1421351_at   | Gria4         | glutamate receptor, ionotropic, AMPA4 (alpha 4)                       | -1.15 | 0.55 | 1.1   | 0.7536 | 1.29  | 0.401  | 1.12  | 0.7698 | 1.56  | 0.4483 |
| 101711_at   | 1422295_at   | Mds1          | myelodysplasia syndrome 1 homolog (human)                             | -1.37 | 0.17 | -1.01 | 0.9668 | -2.01 | 0.0232 | -1.39 | 0.2811 | -3.81 | 0.0475 |
| 101712_at   | 1422218_at   | P2rx7         | purinergic receptor P2X, ligand-gated ion channel                     | -1.19 | 0.55 | -1.12 | 0.2614 | -1.1  | 0.4354 | -1.15 | 0.2655 | 1.12  | 0.4958 |
| 101713_at   | 1420413_at   | Slc7a11       | solute carrier family 7 (cationic amino acid transporters), member 11 | -2.39 | 0.07 | -1.35 | 0.3425 | -1.31 | 0.4124 | -1.41 | 0.2292 | 1.66  | 0.2418 |
| 101714_at   | 1421508_at   | Odz1          | odd Oz/ten-m homolog 1 (Drosophila)                                   | 1.32  | 0.48 | 1.09  | 0.8318 | 1.43  | 0.4349 | 1.37  | 0.5052 | -1.07 | 0.7936 |
| 101715_at   | 1450615_at   | Ear14         | eosinophil-associated, ribonuclease A family 14                       | 2.1   | 0.14 | 1.2   | 0.5571 | 2.42  | 0.1701 | 1.76  | 0.2039 | 1.31  | 0.266  |
| 101716_at   | 1450616_at   | Ear5          | eosinophil-associated, ribonuclease A family 5                        | -1.32 | 0.43 | 1.06  | 0.7514 | -1.01 | 0.9644 | -1.16 | 0.5203 | 1.14  | 0.6328 |
| 101717_at   | 1422281_at   | Sstr4         | somatostatin receptor 4                                               | -1.28 | 0.04 | -1    | 0.9967 | 1.03  | 0.6453 | -1.01 | 0.7804 | 1.09  | 0.1772 |
| 101719_at   | 1450606_at   | Pnmt          | phenylethanolamine-N-methyltransferase                                | -1.08 | 0.36 | 1.25  | 0.1396 | 1.24  | 0.2245 | 1.02  | 0.8633 | 1.09  | 0.5376 |
| 101724_at   | 1423029_at   | Hes2          | hairy and enhancer of split 2 (Drosophila)                            | -1.31 | 0.58 | 1.03  | 0.8047 | -1.14 | 0.3328 | -1.41 | 0.0157 | 1.33  | 0.3248 |
| 101725_at   | 1450530_at   | B3galt1       | UDP-Gal:betaGlcNAc beta 1,3-galactosyltransferase 1                   | 1.04  | 0.91 | 1.15  | 0.6958 | -1.54 | 0.3257 | -1.66 | 0.3243 | 1.14  | 0.7976 |
| 101726_at   | 1422342_at   | Nmbr          | neuromedin B receptor                                                 | 1.3   | 0.68 | -1.68 | 0.1388 | -1.16 | 0.6476 | -2.69 | 0.0116 | 2.31  | 0.0602 |
| 101728_at   | 1422190_at   | C5r1          | complement component 5, receptor 1                                    | -1.56 | 0.09 | -1.01 | 0.944  | 1.04  | 0.7298 | 1     | 0.9882 | 1.11  | 0.5393 |
| 101729_at   | 1423019_at   | Gja9          | gap junction membrane channel protein alpha 9                         | -2.54 | 0.36 | -1.26 | 0.2242 | 1.01  | 0.944  | -1.09 | 0.6165 | 1.32  | 0.5439 |

|             |              |               |                                                   |       |      |       |        |       |        |       |        |        |        |
|-------------|--------------|---------------|---------------------------------------------------|-------|------|-------|--------|-------|--------|-------|--------|--------|--------|
| 101730_at   | 1450288_at   | Cdh6          | cadherin 6                                        | 2.87  | 0.12 | -1.24 | 0.3532 | -1.15 | 0.5394 | -1.2  | 0.2709 | 2.19   | 0.0782 |
| 101732_at   | 1422320_x_at | Phxr5         | per-hexamer repeat gene 5                         | -1.97 | 0.01 | 1.03  | 0.6948 | -1.16 | 0.1298 | -1.04 | 0.6079 | 1.1    | 0.3662 |
| 101733_at   | 1422349_at   | Ccr11         | chemokine (C-C motif) receptor 1-like 1           | -1.84 | 0.32 | 1.25  | 0.4021 | -1.01 | 0.9574 | 1.41  | 0.0442 | 2.13   | 0.0789 |
| 101734_at   | 1421435_at   | Grid2         | glutamate receptor, ionotropic, delta 2           | -1.55 | 0.23 | -1.03 | 0.9215 | 1.45  | 0.2378 | -1.16 | 0.6741 | 2.81   | 0.142  |
| 101735_f_at | 1422415_at   | Ang2          | angiogenin, ribonuclease A family, member         | 1.6   | 0.04 | 1.05  | 0.66   | -1.12 | 0.1578 | -1.07 | 0.4732 | 1.51   | 0.0057 |
| 101736_at   | 1422271_at   | Ppyr1         | pancreatic polypeptide receptor 1                 | -2.04 | 0.49 | 1.18  | 0.6636 | 1     | 0.9866 | 1.36  | 0.5016 | 4.42   | 0.0089 |
| 101738_at   | 1450795_at   | Lhb           | luteinizing hormone beta                          | -1.22 | 0.49 | -1.04 | 0.4703 | -1.12 | 0.1895 | -1.18 | 0.0284 | 1.19   | 0.3053 |
| 101739_at   | 1450619_x_at | Cmar          | cell matrix adhesion regulator                    | -1.09 | 0.45 | -1.08 | 0.6281 | 1.23  | 0.2748 | -1.06 | 0.7554 | 1.15   | 0.3818 |
| 101740_at   | 1421659_at   | Adra1a        | adrenergic receptor, alpha 1a                     | -2.55 | 0.03 | 1.13  | 0.2935 | 1.1   | 0.5918 | -1.2  | 0.249  | 2.48   | 0.1276 |
| 101742_at   | 1421715_at   | V2R2          | tissue-type vomeronasal neurons putative pl       | 1.01  | 0.99 | -1.08 | 0.8183 | 1.12  | 0.7393 | -1.29 | 0.4874 | 5.22   | 0.0187 |
| 101745_f_at | 1452574_x_at | Igh-VJ558     | Similar to Ig H-chain V-JH3-region                | -1.03 | 0.94 | 1.3   | 0.3372 | 1.14  | 0.7003 | -1.01 | 0.9762 | 1.68   | 0.1896 |
| 101748_at   | 1450586_at   | Bdkrb1        | bradykinin receptor, beta 1                       | -1.35 | 0.64 | 1.09  | 0.5074 | 1.08  | 0.4571 | -1.12 | 0.4829 | 1.55   | 0.3901 |
| 101755_f_at | 1450811_at   | Sprr2j        | small proline-rich protein 2J                     | -1.8  | 0.01 | 1.31  | 0.1061 | 1.03  | 0.8946 | 1.12  | 0.5784 | 1.11   | 0.5981 |
| 101756_f_at | 1422425_at   | Sprr2k        | small proline-rich protein 2K                     | -3.84 | 0    | -1.6  | 1.1351 | -1.33 | 0.3329 | -1.37 | 0.3307 | 1.58   | 0.0694 |
| 101760_at   | 1450246_at   | Fut2          | fucosyltransferase 2                              | -1.18 | 0.45 | -1.3  | 0.0875 | -1.39 | 0.0448 | -1.3  | 0.0551 | 1.04   | 0.8448 |
| 101762_at   | 1422401_at   | Sprr3         | small proline-rich protein 3                      | 1.06  | 0.82 | -1.58 | 0.0301 | -1.06 | 0.6193 | -1.57 | 0.0547 | -1.42  | 0.4984 |
| 101763_at   | 1450346_at   | Gpr50         | G-protein-coupled receptor 50                     | -1.35 | 0.11 | -1.01 | 0.9421 | -1.03 | 0.5943 | -1.04 | 0.5308 | 1.1    | 0.3566 |
| 101764_at   | 1422290_at   | Htr1d         | 5-hydroxytryptamine (serotonin) receptor 1D       | -1.08 | 0.68 | -1.03 | 0.7902 | -1.06 | 0.5968 | -1.03 | 0.734  | 1.02   | 0.9092 |
| 101765_at   | 1450573_at   | Amh           | anti-Mullerian hormone                            | -1.16 | 0.23 | -1.04 | 0.5864 | 1.04  | 0.5254 | -1.06 | 0.4507 | 1.44   | 0.0626 |
| 101769_at   | 1427687_at   | Pcdha10       | protocadherin alpha 10                            | -1.29 | 0.6  | -1.06 | 0.7425 | 1.04  | 0.8124 | -1.09 | 0.5594 | 1.29   | 0.1761 |
| 101772_r_at | 1425613_at   | Pcdha11       | protocadherin alpha 11                            | -1.98 | 0.1  | -1.01 | 0.9718 | 1.36  | 0.2028 | 1.04  | 0.8161 | 1.69   | 0.0917 |
| 101775_at   | 1421769_at   | Lmx1b         | LIM homeobox transcription factor 1 beta          | 1.23  | 0.6  | 1.04  | 0.8458 | -1.33 | 0.2793 | -1.8  | 0.043  | 1.93   | 0.19   |
| 101777_at   | 1427783_at   | ErbB4         | v-erb-a erythroblastic leukemia viral oncogene    | -1.59 | 0.25 | -1.03 | 0.8601 | 1.08  | 0.7947 | -1.23 | 0.0648 | 1.28   | 0.3869 |
| 101778_at   | 1422192_at   | Gja5          | gap junction membrane channel protein alpha 5     | -1.17 | 0.54 | -1.06 | 0.6201 | 1.03  | 0.7905 | -1.14 | 0.1966 | 1.22   | 0.1511 |
| 101779_at   | 1422278_at   | Drd3          | dopamine receptor 3                               | 1.19  | 0.64 | 1.13  | 0.3691 | 1.32  | 0.0533 | 1.7   | 0.08   | -1.36  | 0.5061 |
| 101786_at   | 1422255_at   | Kcna4         | potassium voltage-gated channel, shaker-related 4 | -1.37 | 0.51 | 1.13  | 0.6809 | -1.42 | 0.3533 | 1.13  | 0.6945 | 1.77   | 0.1609 |
| 101788_f_at | 1450613_x_at | Ilnab         | interferon alpha family, gene B                   | -1.06 | 0.84 | -1.04 | 0.8638 | -1    | 0.9988 | 1.07  | 0.8333 | 1.71   | 0.1313 |
| 101790_f_at | 1422408_at   | Ilna4         | interferon alpha family, gene 4                   | -1.9  | 0.08 | -1.44 | 0.2867 | -1.17 | 0.6513 | -1.4  | 0.3669 | 1.81   | 0.1436 |
| 101795_f_at | 1422421_at   | Defcr-rs12    | defensin related cryptdin, related sequence       | -1.33 | 0.2  | -1.21 | 0.0459 | -1.06 | 0.5237 | -1.09 | 0.1483 | 1.38   | 0.221  |
| 101796_at   | 1427592_at   | Pcdh7         | protocadherin 7                                   | -1.66 | 0    | 1.02  | 0.8937 | 1.16  | 0.1906 | 1.07  | 0.5176 | 1.2    | 0.3768 |
| 101800_at   | 1422953_at   | Fpr-rs2       | formyl peptide receptor, related sequence 2       | -1.17 | 0.51 | 2.42  | 0.2987 | -1.6  | 0.0604 | 4.29  | 0.2534 | -1.6   | 0.2597 |
| 101801_at   | 1422350_at   | Fpr-rs3       | formyl peptide receptor, related sequence 3       | -1.28 | 0.69 | -1.67 | 0.0802 | -1.34 | 0.2535 | -1.05 | 0.8588 | 1.22   | 0.5703 |
| 101802_at   | 1422358_at   | Fpr-rs4       | formyl peptide receptor, related sequence 4       | -1.26 | 0.39 | 1.27  | 0.4946 | 1.02  | 0.9605 | 1.25  | 0.3487 | 1.97   | 0.1112 |
| 101803_at   | 1430899_at   | Muc5ac        | mucin 5, subtypes A and C, tracheobronchial       | 1.67  | 0.29 | 1.24  | 0.1774 | 1.23  | 0.0848 | -1    | 0.9813 | 1.21   | 0.4106 |
| 101806_at   | 1450581_at   | Galr3         | galanin receptor 3                                | -1.62 | 0.11 | 1.02  | 0.715  | 1.01  | 0.897  | -1.09 | 0.1247 | 1.05   | 0.6322 |
| 101807_at   | 1450594_at   | Magea4        | melanoma antigen, family A, 4                     | -1.09 | 0.88 | -2.22 | 0.0182 | -1.35 | 0.3246 | -1.03 | 0.9389 | 1.44   | 0.2795 |
| 101808_at   | 1422423_at   | Magea7        | melanoma antigen, family A, 7                     | -1.74 | 0.06 | -1.13 | 0.3084 | -1.11 | 0.3844 | -1.27 | 0.0439 | 1.2    | 0.4609 |
| 101810_at   | 1450810_at   | Fshr          | follicle stimulating hormone receptor             | -1.3  | 0.04 | -1.39 | 0.0053 | -1.23 | 0.0386 | -1.1  | 0.496  | 1.15   | 0.5609 |
| 101811_at   | 1450796_at   | Atoh7         | atonal homolog 7 (Drosophila)                     | -2.52 | 0.22 | 1.24  | 0.0329 | 1.3   | 0.0144 | 1.19  | 0.2042 | 1.07   | 0.753  |
| 101815_at   | 1421763_at   | Bmp10         | bone morphogenetic protein 10                     | -1.75 | 0.27 | -1.68 | 0.0332 | 1.01  | 0.9689 | -2.06 | 0.0014 | 1.89   | 0.0464 |
| 101821_at   | 1450575_at   | Chrm4         | cholinergic receptor, muscarinic 4                | -1.68 | 0.4  | 1.04  | 0.711  | 1.15  | 0.3999 | 1.1   | 0.6941 | 1.1    | 0.7521 |
| 101822_at   | 1422237_at   | Mc3r          | melanocortin 3 receptor                           | -1.92 | 0.31 | 1.51  | 0.1189 | 1.35  | 0.243  | 1.37  | 0.2944 | 2.5    | 0.0036 |
| 101825_at   | 1422961_at   | Nat3          | N-acetyltransferase 3                             | -1.86 | 0.48 | -1.21 | 0.5882 | 1.08  | 0.8204 | -1.32 | 0.4586 | 1.21   | 0.6066 |
| 101827_at   | 1422424_at   | Hpv2          | human papillomavirus 18 E5 central sequence       | -3.05 | 0.12 | 1     | 0.9912 | -1.15 | 0.5793 | -1.26 | 0.4288 | 1.08   | 0.7992 |
| 101828_at   | 1421359_at   | Ret           | ret proto-oncogene                                | 1.13  | 0.58 | 1.2   | 0.0827 | 1.21  | 0.0587 | 1.12  | 0.2157 | 1.23   | 0.7247 |
| 101829_at   | 1450833_at   | Chrm1         | cholinergic receptor, muscarinic 1, CNS           | 1.38  | 0.56 | -1.98 | 0.002  | -1.16 | 0.3168 | -1.64 | 0.0095 | -1.01  | 0.9722 |
| 101830_at   | 1452533_at   | Ryr3          | ryanodine receptor 3                              | -1.13 | 0.64 | -1.08 | 0.5481 | -1.17 | 0.1535 | -1.18 | 0.1593 | 1.62   | 0.0169 |
| 101831_at   | 1427571_at   | Shh           | sonic hedgehog                                    | -1.33 | 0.43 | -1.48 | 0.0644 | -1.02 | 0.9426 | -1.33 | 0.1334 | 1.02   | 0.9367 |
| 101834_at   | 1427060_at   | Mapk3         | mitogen activated protein kinase 3                | -1.31 | 0.37 | 1.09  | 0.4953 | 1.05  | 0.81   | 1.12  | 0.4613 | 1.58   | 0.0611 |
| 101835_at   | 1448409_at   | Lrmp          | lymphoid-restricted membrane protein              | -1.25 | 0.32 | 1.01  | 0.8948 | 1.03  | 0.6752 | 1.12  | 0.3326 | 1.32   | 0.2734 |
| 101838_r_at | 1425330_a_at | Ppm1b         | protein phosphatase 1B, magnesium dependent       | 1.55  | 0.64 | 1     | 0.9826 | 1.03  | 0.7774 | -1.31 | 0.0392 | 1.09   | 0.7034 |
| 101839_at   | 1432301_a_at | 1700074P13RIK | RIKEN cDNA 1700074P13 gene                        | -1.15 | 0.79 | -1.16 | 0.684  | 1.23  | 0.5067 | 1.13  | 0.6633 | 2.16   | 0.1564 |
| 101842_g_at | 1460420_a_at | Egfr          | epidermal growth factor receptor                  | -9.5  | 0    | -2.82 | 0.0007 | -1.14 | 0.4491 | -2.67 | 0.001  | -24.13 | 0      |

|             |              |                 |                                                |        |      |        |        |       |        |         |        |         |        |
|-------------|--------------|-----------------|------------------------------------------------|--------|------|--------|--------|-------|--------|---------|--------|---------|--------|
| 101843_at   | 1448874_a_at | Sh2bpsm1        | SH2-B PH domain containing signaling med       | 1.43   | 0.35 | 1.15   | 0.2055 | 1.11  | 0.3286 | 1.14    | 0.1371 | 1.08    | 0.4429 |
| 101844_at   | 1449374_at   | Pipox           | pipecolic acid oxidase                         | 1.14   | 0.51 | 1.25   | 0      | 1.07  | 0.0878 | 1.19    | 0.001  | 1.24    | 0.0148 |
| 101846_r_at | 1460416_s_at | Csprs /// LOC43 | component of Sp100-rs /// similar to homoge    | -1.36  | 0.11 | 1.38   | 0.1347 | 1.25  | 0.3523 | 1.32    | 0.277  | 1.61    | 0.0036 |
| 101848_g_at | 1451821_a_at | Sp100           | nuclear antigen Sp100                          | 1.79   | 0.24 | 1.66   | 0.1356 | 1.59  | 0.2091 | 1.84    | 0.1186 | 1.41    | 0.2997 |
| 101850_at   | 1417635_at   | Spa17           | sperm autoantigenic protein 17                 | 1.17   | 0.66 | -1.15  | 0.6444 | -1.24 | 0.5815 | -1.22   | 0.4567 | 1.03    | 0.9446 |
| 101851_at   | 1448788_at   | Cd200           | Cd200 antigen                                  | -1.35  | 0.27 | -1.41  | 0.0324 | -1.2  | 0.356  | -1.07   | 0.7083 | 1.04    | 0.846  |
| 101853_f_at | 1450876_at   | Cfh             | complement component factor h                  | -1.84  | 0.1  | -1.22  | 0.054  | -1.2  | 0.086  | -1.3    | 0.0042 | -2.08   | 0.0003 |
| 101855_at   | 1422550_a_at | Mtap6           | microtubule-associated protein 6               | -1.03  | 0.93 | -1.08  | 0.8749 | -1.24 | 0.6317 | -1.45   | 0.403  | 1.29    | 0.0341 |
| 101856_at   | 1435525_at   | Kctd17          | potassium channel tetramerisation domain c     | -1.04  | 0.87 | -1.09  | 0.618  | -1.11 | 0.5755 | -1.16   | 0.5025 | -1.21   | 0.6921 |
| 101857_at   | 1448603_at   | Srpk2           | serine/arginine-rich protein specific kinase 2 | 3.34   | 0.08 | -1.24  | 0.4205 | 1.04  | 0.8626 | -1.11   | 0.6746 | -1.36   | 0.6827 |
| 101858_at   | 1460704_at   | Rfng            | radical fringe gene homolog (Drosophila)       | 1      | 0.97 | -1.12  | 0.021  | -1.03 | 0.6223 | -1.13   | 0.069  | 1.08    | 0.455  |
| 101859_at   | 1418848_at   | Aqp7            | aquaporin 7                                    | -1.41  | 0.48 | -1.35  | 0.1194 | -1.06 | 0.7871 | -1.06   | 0.7066 | 1.82    | 0.1908 |
| 101860_at   | 1448571_a_at | Gmfb            | glia maturation factor, beta                   | 1.26   | 0.45 | 1.36   | 0.1474 | 1.23  | 0.502  | 1.62    | 0.0027 | 1.45    | 0.5961 |
| 101861_at   | 1420688_a_at | Sgce            | sarcoglycan, epsilon                           | -1.1   | 0.53 | -1.19  | 0.061  | -1.05 | 0.6627 | 1       | 0.9837 | 1.87    | 0.0027 |
| 101862_at   | 1419590_at   | Cyp2b9          | cytochrome P450, family 2, subfamily b, poly   | 12.19  | 0.07 | -1.09  | 0.3779 | -1.03 | 0.7263 | -1.34   | 0.0234 | 4.22    | 0.0006 |
| 101864_at   | 1424678_at   | Actl7b          | actin-like 7b                                  | -1.44  | 0.02 | -2.18  | 0.0602 | -1.62 | 0.1887 | -1.85   | 0.1179 | -1.12   | 0.2352 |
| 101865_at   | 1419279_at   | Pip5k2a         | phosphatidylinositol-4-phosphate 5-kinase, t   | 1.14   | 0.68 | 1.36   | 0.2587 | -1.06 | 0.8115 | 1.49    | 0.0924 | 1.13    | 0.7511 |
| 101866_at   | 1425507_at   | Arfrp1          | ADP-ribosylation factor related protein 1      | 1.4    | 0.26 | -1.01  | 0.8758 | 1.14  | 0.189  | 1.01    | 0.8837 | -1.3    | 0.1283 |
| 101867_at   | 1419499_at   | Gpam            | Glycerol-3-phosphate acyltransferase, mitoc    | -1.19  | 0.1  | -1.71  | 0.0146 | -1.38 | 0.1028 | -1.65   | 0.0196 | -2.01   | 0.0015 |
| 101868_i_at | 1419744_at   | H2-DMb2         | histocompatibility 2, class II, locus Mb2      | 2.49   | 0.22 | -1.21  | 0.6133 | -1.75 | 0.1661 | -1.3    | 0.483  | -1.21   | 0.4719 |
| 101870_at   | 1427756_x_at | Igh-4           | immunoglobulin heavy chain 4 (serum IgG1)      | -1.42  | 0.31 | 1.03   | 0.7752 | -1    | 0.9982 | 1.01    | 0.8993 | 1.24    | 0.536  |
| 101871_f_at | 1452577_at   | Igh-VJ558       | Immunoglobulin heavy chain (J558 family)       | -1.73  | 0.05 | -1.01  | 0.9243 | 1.09  | 0.5674 | 1.17    | 0.2434 | -1.07   | 0.4857 |
| 101872_at   | 1421041_s_at | Gsta2           | glutathione S-transferase, alpha 2 (Yc2)       | 1.3    | 0.4  | 2.48   | 0      | 1.2   | 0.0378 | 2.68    | 0      | 1.85    | 0.0004 |
| 101873_at   | 1427092_at   | ---             | ---                                            | -1.51  | 0.47 | 1.05   | 0.8041 | -1.25 | 0.307  | -1.11   | 0.5726 | 1.41    | 0.1468 |
| 101874_s_at | 1449529_s_at | Plrpe           | prolactin-like protein E                       | -3.81  | 0.03 | 1.7    | 0.1616 | 1.3   | 0.5281 | -1.2    | 0.4315 | 1.4     | 0.3123 |
| 101875_at   | 1450560_a_at | Ppp2r5d         | protein phosphatase 2, regulatory subunit B    | 1.94   | 0.35 | -1.07  | 0.7913 | 1.64  | 0.097  | -1.21   | 0.4337 | 1.18    | 0.517  |
| 101877_at   | 1455285_at   | Slc31a1         | solute carrier family 31, member 1             | 1.27   | 0.16 | 1.05   | 0.3935 | -1.04 | 0.5381 | -1.01   | 0.8605 | -1.21   | 0.2351 |
| 101878_at   | 1426112_a_at | Cd72            | CD72 antigen                                   | 1.14   | 0.85 | -1.76  | 0.1981 | -1.41 | 0.3654 | -1.46   | 0.324  | 1.94    | 0.1401 |
| 101879_s_at | 1422563_at   | Crry            | complement receptor related protein            | 1.71   | 0.01 | 1.07   | 0.3886 | 1.11  | 0.2976 | 1.06    | 0.3858 | -1.18   | 0.0421 |
| 101882_s_at | 1418237_s_at | Col18a1         | procollagen, type XVIII, alpha 1               | 1.01   | 0.98 | 1.02   | 0.7895 | -1.21 | 0.0902 | 1.04    | 0.6375 | -1.09   | 0.7373 |
| 101883_s_at | 1420357_s_at | Xlr3a /// Xlr3b | X-linked lymphocyte-regulated 3a /// X-linker  | 4.83   | 0.01 | -1.51  | 0.2701 | -1.17 | 0.744  | -1.12   | 0.7182 | 1.01    | 0.9904 |
| 101884_at   | 1449347_a_at | Xlr4            | X-linked lymphocyte-regulated 4                | 1.37   | 0.37 | 1.18   | 0.5343 | 1.35  | 0.3196 | 1.48    | 0.1677 | 1.62    | 0.314  |
| 101886_f_at | 1451931_x_at | H2-D1           | histocompatibility 2, D region locus 1         | 1.16   | 0.73 | 1.2    | 0.2692 | -1.11 | 0.1789 | 1.25    | 0.2826 | -1.48   | 0.1339 |
| 101887_at   | 1423396_at   | Agt             | angiotensinogen                                | 1.26   | 0.27 | 1.26   | 0.0186 | 1.03  | 0.7811 | 1.13    | 0.1575 | 3.03    | 0.0003 |
| 101889_s_at | 1420583_a_at | Rora            | RAR-related orphan receptor alpha              | -1.17  | 0.81 | 1.38   | 0.0111 | 1.26  | 0.0091 | 1.51    | 0.0013 | 1.21    | 0.4209 |
| 101891_at   | 1418352_at   | Hsd17b2         | hydroxysteroid (17-beta) dehydrogenase 2       | -1.97  | 0.01 | -2.81  | 0      | -1.71 | 0      | -3.9    | 0      | -2.58   | 0.0004 |
| 101892_f_at | 1437767_s_at | Fts             | fused toes                                     | 1.88   | 0.08 | 1.11   | 0.5166 | 1.07  | 0.5832 | 1.04    | 0.7306 | -1.17   | 0.4421 |
| 101894_s_at | 1423364_a_at | Fts             | fused toes                                     | 1.08   | 0.83 | -1.04  | 0.8044 | 1.25  | 0.2196 | 1.08    | 0.5434 | -1.15   | 0.6061 |
| 101897_g_at | 1421647_at   | Cd1d2           | CD1d2 antigen                                  | -1.3   | 0.51 | -1.07  | 0.4885 | -1.21 | 0.0127 | -1.15   | 0.0957 | -1.58   | 0.2037 |
| 101898_s_at | 1425137_a_at | H2-Q10          | histocompatibility 2, Q region locus 10        | -1.1   | 0.41 | -1.16  | 0.0001 | -1.09 | 0.0551 | -1.28   | 0      | -1.15   | 0.165  |
| 101899_at   | 1418897_at   | F2              | coagulation factor II                          | -1.03  | 0.8  | 1.03   | 0.4633 | -1.01 | 0.867  | -1.05   | 0.2908 | -1      | 0.9977 |
| 101900_at   | 1449152_at   | Cdkn2b          | cyclin-dependent kinase inhibitor 2B (p15, in  | -2.14  | 0.3  | -1.02  | 0.8973 | 1.01  | 0.9589 | 1.15    | 0.562  | -1.48   | 0.5078 |
| 101902_at   | 1418114_at   | Rbpsi           | recombining binding protein suppressor of h    | 1.1    | 0.19 | 1.03   | 0.7373 | -1.03 | 0.699  | 1.15    | 0.0973 | -1.18   | 0.6178 |
| 101904_at   | 1427714_at   | Smyd1           | SET and MYND domain containing 1               | -1.36  | 0.64 | -1.44  | 0.0155 | 1.02  | 0.8823 | -1.12   | 0.3067 | 1.57    | 0.0979 |
| 101905_at   | 1415769_at   | Itchy           | itchy                                          | -1.4   | 0.05 | -1.03  | 0.5614 | 1.07  | 0.3822 | -1.01   | 0.9193 | 1.14    | 0.4018 |
| 101906_at   | 1452197_at   | Smc4l1          | SMC4 structural maintenance of chromosom       | 1.47   | 0.07 | 1.26   | 0.0504 | 1.08  | 0.5501 | 1.24    | 0.0048 | 1.23    | 0.239  |
| 101908_s_at | 1422123_s_at | Ceacam1 /// Ce  | CEA-related cell adhesion molecule 1 /// CE    | -1.47  | 0.16 | -1.18  | 0.1053 | -1.08 | 0.647  | -1.44   | 0.0079 | -1.5    | 0.074  |
| 101910_f_at | 142763826    | LOC433826       | similar to Mup3 protein                        | -2.21  | 0.06 | -2.76  | 0      | -1.06 | 0.3296 | -3.98   | 0      | -4.33   | 0      |
| 101912_at   | 1434484_at   | 1100001G20Ri    | RIKEN cDNA 1100001G20 gene                     | -24.22 | 0    | -57.99 | 0      | -1.22 | 0.0017 | -112.07 | 0      | -136.16 | 0      |
| 101913_at   | 1429400_at   | Clcn5           | chloride channel 5                             | 1.7    | 0.12 | 1.45   | 0.2154 | 1.48  | 0.2527 | 1.39    | 0.4733 | 1.85    | 0.1532 |
| 101914_at   | 1415731_at   | D1Erttd396e     | DNA segment, Chr 1, ERATO Doi 396, expr        | 1.37   | 0.1  | 1.13   | 0.2027 | 1.11  | 0.4626 | 1.23    | 0.041  | 1.14    | 0.0695 |
| 101916_at   | 1423938_at   | Llglh2          | lethal giant larvae homolog 2                  | 1.27   | 0.5  | 1.02   | 0.8607 | -1.2  | 0.1352 | 1.02    | 0.8704 | 1.15    | 0.2144 |
| 101917_at   | 1420692_at   | Il2ra           | interleukin 2 receptor, alpha chain            | -2.95  | 0.26 | 1.01   | 0.9838 | -1.36 | 0.5014 | -1.17   | 0.7454 | 2.56    | 0.0723 |

|             |              |               |                                                 |       |      |       |        |       |        |       |        |       |        |
|-------------|--------------|---------------|-------------------------------------------------|-------|------|-------|--------|-------|--------|-------|--------|-------|--------|
| 101918_at   | 1420653_at   | Tgfb1         | transforming growth factor, beta 1              | 1.38  | 0.49 | 1.59  | 0.2863 | -1.05 | 0.7118 | 2.29  | 0.1239 | 1.27  | 0.1982 |
| 101919_at   | 1425972_a_at | Zfx           | zinc finger protein X-linked                    | 1.2   | 0.4  | 1.12  | 0.3111 | 1.24  | 0.214  | 1.19  | 0.0395 | -1.03 | 0.9095 |
| 101921_at   | 1449048_s_at | ---           | ---                                             | 1.23  | 0.21 | 1     | 0.9681 | 1.19  | 0.0047 | 1.1   | 0.243  | 1.04  | 0.74   |
| 101922_at   | 1417204_at   | Kdelr2        | KDEL (Lys-Asp-Glu-Leu) endoplasmic reticu       | 1.08  | 0.81 | 1.06  | 0.3831 | -1.06 | 0.451  | 1.01  | 0.8689 | 1.2   | 0.0872 |
| 101926_at   | 1417216_at   | ---           | ---                                             | -1.11 | 0.68 | -1.08 | 0.4681 | 1.01  | 0.9569 | -1.11 | 0.418  | 2.15  | 0.0386 |
| 101927_at   | 1416754_at   | Prkar1b       | protein kinase, cAMP dependent regulatory,      | -1.47 | 0.13 | -1.11 | 0.4793 | -1.07 | 0.7305 | -1.04 | 0.8104 | -1.02 | 0.9018 |
| 101928_at   | 1417498_at   | Serpinf2      | serine (or cysteine) proteinase inhibitor, clac | 1.19  | 0.55 | -1.02 | 0.8366 | -1.01 | 0.9646 | 1     | 0.9948 | -1.13 | 0.6224 |
| 101929_at   | 1418258_s_at | 6720463E02Rik | RIKEN cDNA 6720463E02 gene                      | -1.39 | 0.56 | -1.02 | 0.8294 | -1.83 | 0.0003 | -1.79 | 0.0003 | -1.35 | 0.0912 |
| 101930_at   | 1436364_x_at | ---           | ---                                             | -1.14 | 0.83 | -1.33 | 0.0198 | -1.45 | 0.0811 | -1.6  | 0.0208 | -1.13 | 0.8472 |
| 101931_at   | 1416372_at   | Ptdss1        | phosphatidylserine synthase 1                   | -1.01 | 0.97 | -1.1  | 0.0329 | -1.11 | 0.0952 | -1.08 | 0.071  | -1.07 | 0.5084 |
| 101932_at   | 1418540_a_at | Ptpre         | protein tyrosine phosphatase, receptor type,    | 1.36  | 0.26 | 1.58  | 0.0974 | 1.07  | 0.8183 | 1.17  | 0.6804 | 1.11  | 0.7239 |
| 101933_at   | 1422664_at   | Rab10         | RAB10, member RAS oncogene family               | -1.53 | 0.42 | -1.13 | 0.1835 | -1.15 | 0.3052 | -1.25 | 0.0123 | 1.21  | 0.4859 |
| 101934_at   | 1434348_at   | Fez2          | fasciculation and elongation protein zeta 2 (;  | 1.42  | 0.08 | -1.02 | 0.8483 | -1.06 | 0.5222 | 1.08  | 0.3594 | -1.1  | 0.5622 |
| 101936_at   | 1422886_a_at | Clk4          | CDC like kinase 4                               | 1.97  | 0.05 | 1.38  | 0.0033 | 1.58  | 0.0539 | 1.58  | 0.0009 | 1.45  | 0.0788 |
| 101937_s_at | 1427663_a_at | Clk4          | CDC like kinase 4                               | 1.78  | 0.34 | 1.22  | 0.078  | 1.16  | 0.2073 | 1.16  | 0.2062 | 1.44  | 0.4895 |
| 101938_at   | 1419500_at   | Pabpc2        | poly A binding protein, cytoplasmic 2           | -1.53 | 0.03 | 1.01  | 0.9296 | -1.04 | 0.6747 | 1.06  | 0.662  | 1.01  | 0.9081 |
| 101939_at   | 1433655_at   | Rnf141        | Ring finger protein 141                         | -1.38 | 0.02 | 1.1   | 0.3878 | 1.07  | 0.3992 | 1.13  | 0.2128 | 1.28  | 0.1218 |
| 101940_at   | 1416999_at   | Smpd2         | sphingomyelin phosphodiesterase 2, neutral      | -1.08 | 0.59 | -1.01 | 0.8624 | -1.01 | 0.8712 | -1.03 | 0.6491 | -1.07 | 0.4576 |
| 101942_at   | 1435799_at   | Sfrs14        | splicing factor, arginine/serine-rich 14        | -1.49 | 0.13 | -1.27 | 0.0605 | 1.03  | 0.8205 | -1.1  | 0.4737 | 1.02  | 0.9031 |
| 101943_at   | 1434117_at   | Tceb3         | transcription elongation factor B (SIII), polyp | -1.04 | 0.87 | -1.07 | 0.4098 | -1.03 | 0.6212 | -1.07 | 0.2549 | 1.01  | 0.8732 |
| 101947_at   | 1417734_at   | Akap8l        | A kinase (PRKA) anchor protein 8-like           | 2.29  | 0.06 | 1.16  | 0.0956 | 1.25  | 0.0668 | 1.57  | 0.0004 | 1.5   | 0.3894 |
| 101948_at   | 1424114_s_at | Lamb1-1       | laminin B1 subunit 1                            | 1.17  | 0.56 | 1.35  | 0.2012 | 1.37  | 0.2248 | 1.4   | 0.0547 | 2.15  | 0.1863 |
| 101949_at   | 1431938_a_at | Pmm2          | phosphomannomutase 2                            | 1.43  | 0.27 | -1.05 | 0.6953 | 1.08  | 0.2198 | -1.04 | 0.6427 | -1.67 | 0.1784 |
| 101950_at   | 1417178_at   | MGI:1889209   | semaF cytoplasmic domain associated prote       | 2.44  | 0.03 | 1.27  | 0.5472 | 1.06  | 0.8881 | 2.54  | 0.0288 | 1.66  | 0.3681 |
| 101952_at   | 1460373_a_at | ORF21         | open reading frame 21                           | 2.13  | 0.1  | -3.46 | 0.0005 | 1.79  | 0.0219 | -3.09 | 0.0017 | 1.35  | 0.3776 |
| 101954_at   | 1416415_a_at | H2afz         | H2A histone family, member Z                    | 1.3   | 0.22 | 1.27  | 0.038  | 1.06  | 0.6544 | 1.25  | 0.0787 | -1.26 | 0.0923 |
| 101955_at   | 1427464_s_at | Hspa5         | heat shock 70kD protein 5 (glucose-regulate     | -1.11 | 0.59 | -1.18 | 0.0925 | -1.22 | 0.0671 | -1.29 | 0.0126 | -1.54 | 0.0107 |
| 101956_at   | 1452181_at   | Ckap4         | Cytoskeleton-associated protein 4               | -1.22 | 0.64 | 1.75  | 0.2944 | 1.32  | 0.1965 | -1.19 | 0.3881 | 1.42  | 0.2577 |
| 101957_f_at | 1435368_a_at | Parp1         | poly (ADP-ribose) polymerase family, memb       | 1.22  | 0.55 | -1.25 | 0.3985 | -1.3  | 0.3963 | 1.03  | 0.9121 | -1.38 | 0.4835 |
| 101960_at   | 1423880_at   | D10Wsu52e     | DNA segment, Chr 10, Wayne State Univers        | 1.79  | 0.01 | 1.02  | 0.7125 | -1.06 | 0.4552 | 1.1   | 0.0992 | -1.07 | 0.5223 |
| 101961_at   | 1416815_s_at | Bub3          | budding uninhibited by benzimidazoles 3 ho      | 1.11  | 0.27 | 1.02  | 0.7814 | 1.07  | 0.0551 | 1.05  | 0.2423 | -1.12 | 0.3553 |
| 101962_at   | 1452155_a_at | Ddx17         | DEAD (Asp-Glu-Ala-Asp) box polypeptide 1;       | -1.16 | 0.51 | 1.02  | 0.8427 | -1.16 | 0.2308 | 1.05  | 0.5802 | 1.03  | 0.8936 |
| 101963_at   | 1451310_a_at | Ctsl          | cathepsin L                                     | 1.17  | 0.6  | 1.16  | 0.0194 | 1.14  | 0.0957 | 1.19  | 0.0064 | 1.26  | 0.0446 |
| 101964_at   | 1451015_at   | Tkt           | transketolase                                   | 1.12  | 0.18 | -1.31 | 0.0215 | -1.2  | 0.2516 | -1.65 | 0.0009 | -2.68 | 0.0147 |
| 101965_at   | 1451074_at   | Rnf13         | ring finger protein 13                          | -1.06 | 0.77 | 1.03  | 0.7494 | 1.06  | 0.6091 | -1.03 | 0.7741 | 1.12  | 0.3964 |
| 101966_s_at | 1420620_a_at | Rnf13         | ring finger protein 13                          | 1.03  | 0.95 | -1.12 | 0.2269 | -1.06 | 0.5393 | -1.24 | 0.0417 | -1.04 | 0.8372 |
| 101967_at   | 1416857_at   | Sdf2          | stromal cell derived factor 2                   | -1.51 | 0.05 | -1.46 | 0.0761 | -1.19 | 0.2173 | -1.27 | 0.211  | 1.54  | 0.0636 |
| 101968_at   | 1422585_at   | Odf1          | outer dense fiber of sperm tails 1              | -1.01 | 0.98 | -1.17 | 0.2802 | 1.12  | 0.2233 | -1.16 | 0.0574 | 1.83  | 0.0204 |
| 101969_at   | 1448428_at   | ---           | ---                                             | -1.44 | 0.02 | 1.27  | 0.4423 | 1.22  | 0.2344 | -1.02 | 0.9015 | -1.21 | 0.5446 |
| 101970_at   | 1419928_at   | Lrig1         | leucine-rich repeats and immunoglobulin-like    | 1.17  | 0.83 | -1.31 | 0.4798 | -1.11 | 0.8016 | -1.28 | 0.5238 | 1.85  | 0.0003 |
| 101971_at   | 1423729_a_at | 2500002L14Rik | RIKEN cDNA 2500002L14 gene                      | 1.44  | 0.06 | 1.07  | 0.1712 | -1.15 | 0.0853 | 1.15  | 0.0097 | -1.21 | 0.0953 |
| 101972_at   | 1423590_at   | Napsa         | napsin A aspartic peptidase                     | 1.46  | 0.25 | 1.25  | 0.2249 | 1.02  | 0.9094 | 3.11  | 0.2743 | 1.22  | 0.1496 |
| 101973_at   | 1452207_at   | ---           | ---                                             | 1.1   | 0.74 | -1.07 | 0.4518 | -1.19 | 0.2271 | -1.25 | 0.02   | -1.84 | 0.035  |
| 101975_at   | 1449939_s_at | Dlk1          | delta-like 1 homolog (Drosophila)               | -1.67 | 0.07 | -1.02 | 0.8662 | -1.04 | 0.7377 | 1.14  | 0.4757 | 1.72  | 0.0045 |
| 101976_at   | 1416163_at   | Cops4         | COP9 (constitutive photomorphogenic) hom        | 1.85  | 0.13 | -1.01 | 0.8555 | 1.05  | 0.6277 | 1.01  | 0.8535 | -1.26 | 0.2774 |
| 101977_at   | 1451575_a_at | Nudt3         | nudix (nucleotide diphosphate linked moiety     | 1.05  | 0.77 | -1.22 | 0.0343 | -1.04 | 0.4902 | -1.17 | 0.0077 | 1.27  | 0.0004 |
| 101978_at   | 1451624_a_at | 1700048E23Rik | RIKEN cDNA 1700048E23 gene                      | 1.46  | 0.47 | 1.13  | 0.3515 | 1.28  | 0.059  | 1.05  | 0.7191 | -1.34 | 0.2453 |
| 101979_at   | 1453851_a_at | Gadd45g       | growth arrest and DNA-damage-inducible 4f       | -1.66 | 0.07 | -2.11 | 0.0317 | -2.09 | 0.0393 | -1.91 | 0.0503 | -2.77 | 0.094  |
| 101982_at   | 1451097_at   | ---           | ---                                             | 1.24  | 0.53 | 1.16  | 0.3756 | -1.1  | 0.4813 | 1.29  | 0.2687 | 1.07  | 0.7131 |
| 101984_at   | 1460639_a_at | Atox1         | ATX1 (antioxidant protein 1) homolog 1 (yea     | 1.05  | 0.88 | 1.27  | 0.0044 | 1.06  | 0.3341 | 1.25  | 0.0086 | 1.04  | 0.8418 |
| 101985_at   | 1416729_at   | Plg           | plasminogen                                     | 1.19  | 0.73 | -1.04 | 0.2587 | -1.38 | 0.0537 | -1.29 | 0.0758 | -1.07 | 0.6301 |
| 101989_at   | 1428782_a_at | Uqcrc1        | ubiquinol-cytochrome c reductase core prote     | 1.39  | 0.06 | 1.15  | 0.0634 | 1.13  | 0.1022 | 1.19  | 0.0064 | 1.12  | 0.4735 |
| 101990_at   | 1455235_x_at | Ldh2          | lactate dehydrogenase 2, B chain                | 2.14  | 0.03 | 1.32  | 0.2298 | 1.33  | 0.1923 | 2.03  | 0.0035 | 2.38  | 0.0017 |

|             |              |                 |                                                |       |      |       |        |       |        |       |        |       |        |
|-------------|--------------|-----------------|------------------------------------------------|-------|------|-------|--------|-------|--------|-------|--------|-------|--------|
| 101991_at   | 1417429_at   | Fmo1            | flavin containing monooxygenase 1              | -1.35 | 0.25 | -1.28 | 0.0005 | 1     | 0.9901 | -1.21 | 0.0103 | 1.01  | 0.9434 |
| 101992_at   | 1448822_at   | Psmb6           | proteasome (prosome, macropain) subunit, l     | 1.85  | 0.01 | 1.27  | 0.0225 | 1.35  | 0.0087 | 1.27  | 0.0382 | -1.05 | 0.7856 |
| 101993_at   | 1416342_at   | Tnc             | tenascin C                                     | -1.02 | 0.95 | -1.33 | 0.3847 | -1.24 | 0.4504 | -1.09 | 0.7355 | -1.08 | 0.8    |
| 101995_at   | 1450957_a_at | Sqstm1          | sequestosome 1                                 | -1.15 | 0.33 | 1.07  | 0.1364 | -1.14 | 0.0298 | -1.07 | 0.2073 | 1.11  | 0.3684 |
| 101996_at   | 1438562_a_at | Ptpn2           | protein tyrosine phosphatase, non-receptor 1   | 1.43  | 0.1  | 1.49  | 0.0002 | 1.27  | 0.3575 | 1.43  | 0.0102 | 1.18  | 0.3864 |
| 101997_at   | 1451747_a_at | Apg12l          | autophagy 12-like (S. cerevisiae)              | 1.1   | 0.63 | 1.15  | 0.0455 | 1.18  | 0.046  | 1.09  | 0.0757 | -1.16 | 0.4012 |
| 101998_at   | 1419636_at   | 4833420G17Rik   | RIKEN cDNA 4833420G17 gene                     | 1.59  | 0.08 | 1.27  | 0.2968 | 1.28  | 0.2306 | 1.25  | 0.0737 | 1.16  | 0.464  |
| 102000_f_at | 1435757_a_at | Uqcrc2          | ubiquinol cytochrome c reductase core prote    | 1.31  | 0.46 | 1.03  | 0.7268 | -1.07 | 0.5853 | 1.11  | 0.2455 | 1.19  | 0.3824 |
| 102001_at   | 1448226_at   | Rrm2            | ribonucleotide reductase M2                    | -1.39 | 0.2  | 1.26  | 0.516  | -1.4  | 0.0707 | 1.62  | 0.1888 | 1.25  | 0.392  |
| 102002_at   | 1450021_at   | Ubqln2          | ubiquilin 2                                    | 1.21  | 0.5  | 1.5   | 0.0068 | 1.34  | 0.1473 | 1.65  | 0.0008 | 1.3   | 0.1101 |
| 102003_at   | 1415709_s_at | Gbf1            | golgi-specific brefeldin A-resistance factor 1 | 1.01  | 0.91 | -1.13 | 0.0005 | -1.11 | 0.0184 | -1.21 | 0.0001 | -1.11 | 0.2751 |
| 102009_at   | 1449273_at   | Cyfiip2         | cytoplasmic FMR1 interacting protein 2         | 1.27  | 0.68 | 1.23  | 0.1342 | 1.01  | 0.9634 | 1.04  | 0.8419 | -1.02 | 0.9523 |
| 102010_at   | 1427487_at   | ---             | ---                                            | -1.27 | 0.75 | -1.24 | 0.4774 | -1.53 | 0.1417 | -1.27 | 0.2574 | 1.49  | 0.5713 |
| 102011_at   | 1421948_a_at | 2610507L03Rik   | RIKEN cDNA 2610507L03 gene                     | 1.76  | 0.03 | 1.18  | 0.1101 | -1.26 | 0.1687 | 1.09  | 0.2919 | 1.97  | 0.096  |
| 102012_at   | 1418895_at   | Scap2           | src family associated phosphoprotein 2         | 1.37  | 0.1  | 1.2   | 0.057  | 1.1   | 0.0479 | 1.27  | 0.1197 | -1.21 | 0.1557 |
| 102013_at   | 1420541_at   | Rdh6            | retinol dehydrogenase 6                        | 2.99  | 0.14 | -1.06 | 0.4865 | -1.21 | 0.0953 | -1.17 | 0.2603 | -1.42 | 0.0377 |
| 102014_at   | 1424859_at   | Homer3          | homer homolog 3 (Drosophila)                   | 1.33  | 0.29 | 1.07  | 0.8634 | 1.12  | 0.7293 | 1.04  | 0.9093 | 1.85  | 0.0381 |
| 102015_at   | 1435681_s_at | LOC234374       | similar to hypothetical protein FLJ10432       | 1.09  | 0.74 | -1.12 | 0.5045 | -1.32 | 0.0918 | 1.09  | 0.772  | 1.79  | 0.0927 |
| 102016_at   | 1452260_at   | Cidec           | cell death-inducing DFFA-like effector c       | 1.24  | 0.69 | -1.23 | 0.2501 | -1.35 | 0.1152 | -1.1  | 0.5572 | -1.09 | 0.774  |
| 102017_at   | 1425498_at   | Prpf4b          | PRP4 pre-mRNA processing factor 4 homolo       | 2.14  | 0.21 | 1.24  | 0.0176 | 1.28  | 0.0102 | 1.31  | 0.0003 | 1.09  | 0.8758 |
| 102018_at   | 1435965_at   | Cnot3           | CCR4-NOT transcription complex, subunit 3      | -1.29 | 0.18 | -1.03 | 0.6426 | -1.19 | 0.1669 | -1.14 | 0.2489 | 1.21  | 0.2235 |
| 102019_at   | 1460354_a_at | Mrp13           | mitochondrial ribosomal protein L13            | 1.95  | 0.02 | 1.02  | 0.8384 | 1.2   | 0.229  | 1.14  | 0.0467 | -1.16 | 0.266  |
| 102020_at   | 1426058_a_at | Kcnk3           | potassium channel, subfamily K, member 3       | 3.21  | 0.31 | -1.31 | 0.0673 | -1.05 | 0.6807 | -1.26 | 0.0784 | -1.19 | 0.5889 |
| 102021_at   | 1421034_a_at | Il4ra           | interleukin 4 receptor, alpha                  | 1.2   | 0.45 | 1.11  | 0.2689 | -1.01 | 0.8928 | -1.06 | 0.5558 | 1.12  | 0.4028 |
| 102022_at   | 1438477_a_at | Mcee            | methylmalonyl CoA epimerase                    | 2.16  | 0.01 | 1.17  | 0.0198 | -1.12 | 0.0159 | 1.05  | 0.469  | -1.1  | 0.5883 |
| 102025_at   | 1417851_at   | Cxcl13          | chemokine (C-X-C motif) ligand 13              | 3.75  | 0.1  | -1.63 | 0.2083 | -1.11 | 0.8095 | 1.56  | 0.3134 | 2.84  | 0.0379 |
| 102026_s_at | 1448448_a_at | Chkb            | choline kinase beta                            | 1.13  | 0.47 | 1.06  | 0.4867 | -1.03 | 0.6593 | 1.07  | 0.3288 | 1.33  | 0.0769 |
| 102028_at   | 1422638_s_at | Rassf5          | Ras association (RalGDS/AF-6) domain fam       | 1.07  | 0.74 | -1.21 | 0.0679 | 1.02  | 0.8586 | -1.15 | 0.1615 | -1.38 | 0.0514 |
| 102029_at   | 1448686_at   | Il16            | interleukin 16                                 | 1.48  | 0.09 | -1.02 | 0.7959 | 1.02  | 0.8048 | -1.02 | 0.7795 | 1.44  | 0.1961 |
| 102030_at   | 1420948_s_at | 4833408C14Rik   | RIKEN cDNA 4833408C14 gene                     | 2.88  | 0.07 | 1.31  | 0.1104 | 1.36  | 0.0898 | 1.21  | 0.2054 | 3.01  | 0.0748 |
| 102031_at   | 1453833_a_at | Rnaseh1         | ribonuclease H1                                | 3.17  | 0.06 | 1.18  | 0.6421 | 1.07  | 0.8434 | 1.52  | 0.1142 | 1.15  | 0.3933 |
| 102032_at   | 1450388_s_at | Twsg1 /// 1810C | twisted gastrulation homolog 1 (Drosophila)    | -1.11 | 0.51 | 1.12  | 0.1089 | 1.1   | 0.319  | -1.03 | 0.6336 | -1.01 | 0.963  |
| 102033_at   | 1450662_at   | Tesk1           | testis specific protein kinase 1               | -1.13 | 0.7  | -1.03 | 0.7773 | -1.1  | 0.2115 | -1.18 | 0.0697 | -1.45 | 0.2075 |
| 102035_at   | 1430889_a_at | Tpmt            | thiopurine methyltransferase                   | 1.41  | 0.33 | 1.15  | 0.2294 | -1.08 | 0.6154 | 1.42  | 0.0069 | 1.14  | 0.4802 |
| 102036_at   | 1452069_a_at | Thap7           | THAP domain containing 7                       | 1.07  | 0.87 | 1.17  | 0.0975 | 1.13  | 0.2019 | 1.21  | 0.0366 | 1.44  | 0.3665 |
| 102037_at   | 1451990_at   | Mapre2          | microtubule-associated protein, RP/EB famil    | -1.06 | 0.93 | -1.21 | 0.5364 | -1.26 | 0.4778 | 1.08  | 0.726  | 1.1   | 0.8253 |
| 102038_at   | 1450251_a_at | Lnx1            | ligand of numb-protein X 1                     | 3.71  | 0.01 | -2.43 | 0.0369 | -1.11 | 0.7413 | -1.94 | 0.1061 | -2.42 | 0.2656 |
| 102039_at   | 1448585_at   | Gtf2h4          | general transcription factor II H, polypeptide | 1.02  | 0.87 | -1.08 | 0.2589 | -1.07 | 0.4126 | -1.08 | 0.3591 | -1.06 | 0.6316 |
| 102040_at   | 1451672_at   | Gprk6           | G protein-coupled receptor kinase 6            | 2.32  | 0.29 | 1.2   | 0.3859 | 1.13  | 0.6053 | 1.21  | 0.4075 | 1.51  | 0.2843 |
| 102041_at   | 1450917_at   | Myom2           | myomesin 2                                     | -2.42 | 0.13 | -1.63 | 0.2329 | -1.17 | 0.6766 | -1.38 | 0.5751 | -1.42 | 0.3666 |
| 102043_at   | 1416689_at   | Tuft1           | tuftelin 1                                     | -1.53 | 0.03 | -1.16 | 0.0908 | -1.06 | 0.3037 | -1.11 | 0.1042 | 1.05  | 0.8542 |
| 102044_at   | 1448594_at   | Wisp1           | WNT1 inducible signaling pathway protein 1     | -1.35 | 0.16 | 1.08  | 0.5736 | -1.18 | 0.4037 | -1.31 | 0.0862 | -1.31 | 0.2761 |
| 102046_at   | 1449121_at   | Fusip1          | FUS interacting protein (serine-arginine rich) | 1.74  | 0.02 | 1.03  | 0.7034 | -1.04 | 0.65   | 1.01  | 0.906  | 1.1   | 0.638  |
| 102047_at   | 1415683_at   | Nmt1            | N-myristoyltransferase 1                       | 1.4   | 0.23 | 1.06  | 0.4894 | 1.04  | 0.5036 | 1.16  | 0.0061 | -1.32 | 0.0306 |
| 102048_at   | 1420992_at   | Ankrd1          | ankyrin repeat domain 1 (cardiac muscle)       | 1.48  | 0.38 | -1.44 | 0.2929 | -1.24 | 0.5623 | -1.25 | 0.541  | 1.41  | 0.3195 |
| 102049_at   | 1417273_at   | Pdk4            | pyruvate dehydrogenase kinase, isoenzyme       | -1.53 | 0.09 | -1.26 | 0.2198 | -1.38 | 0.1446 | -1.32 | 0.1545 | 1.1   | 0.5007 |
| 102052_at   | 1417566_at   | Abhd5           | abhydrolase domain containing 5                | 1.23  | 0.46 | 1.17  | 0.0994 | -1.09 | 0.402  | 1.16  | 0.0403 | -1.22 | 0.1749 |
| 102053_at   | 1448961_at   | Plscr2          | phospholipid scramblase 2                      | 1.39  | 0.3  | -1.48 | 0.0068 | -1.08 | 0.5351 | -1.5  | 0.0042 | -6.87 | 0.0003 |
| 102054_at   | 1417685_at   | Ankfy1          | ankyrin repeat and FYVE domain containing      | 1.07  | 0.77 | -1.06 | 0.4337 | 1.02  | 0.7683 | -1.02 | 0.7556 | -1.12 | 0.1829 |
| 102058_at   | 1427297_at   | Mrp19           | mitochondrial ribosomal protein L9             | 1.48  | 0.06 | 1.08  | 0.2357 | 1.2   | 0.0656 | 1.13  | 0.1626 | 1.11  | 0.383  |
| 102059_at   | 1449377_at   | Nicn1           | nicotin 1                                      | 1.41  | 0.39 | 1.08  | 0.5154 | 1.01  | 0.9226 | 1.02  | 0.8472 | -1.28 | 0.5603 |
| 102060_at   | 1460213_at   | Golga4          | golgi autoantigen, golgin subfamily a, 4       | -1.22 | 0.19 | -1.06 | 0.3694 | -1.05 | 0.3287 | -1.1  | 0.0602 | 1.01  | 0.915  |
| 102061_at   | 1418589_a_at | Mlf1            | myeloid leukemia factor 1                      | 1.96  | 0.4  | -1.3  | 0.5241 | 1.1   | 0.8351 | -1.43 | 0.4638 | 1.54  | 0.0796 |

|             |              |                     |                                                  |       |      |       |        |       |        |       |        |       |        |
|-------------|--------------|---------------------|--------------------------------------------------|-------|------|-------|--------|-------|--------|-------|--------|-------|--------|
| 102062_at   | 1423416_at   | Smarcc1             | SWI/SNF related, matrix associated, actin di     | -1.36 | 0.44 | -1.09 | 0.484  | -1.42 | 0.0608 | -1.42 | 0.1013 | 1.32  | 0.1178 |
| 102063_at   | 1416501_at   | Pdpk1               | 3-phosphoinositide dependent protein kinase      | -1.18 | 0.8  | -1.05 | 0.7534 | -2.02 | 0.0071 | -1.67 | 0.0067 | 1.59  | 0.3662 |
| 102064_at   | 1449265_at   | Casp1               | caspase 1                                        | 1.15  | 0.43 | 1.16  | 0.4598 | 1.03  | 0.745  | 1.4   | 0.2126 | -1.2  | 0.5628 |
| 102065_at   | 1418243_at   | Fcna                | ficolin A                                        | 1.2   | 0.28 | -1.79 | 0      | -1.15 | 0.0552 | -1.99 | 0      | -1.44 | 0.0437 |
| 102069_at   | 1418514_at   | Mtf2                | metal response element binding transcriptio      | 1.65  | 0.12 | -1.21 | 0.0117 | -1.32 | 0.0052 | -1.16 | 0.0453 | -1.03 | 0.896  |
| 102070_at   | 1460734_at   | Col9a3              | procollagen, type IX, alpha 3                    | -1.5  | 0.08 | -1.26 | 0.07   | -1.11 | 0.4316 | -1.14 | 0.2381 | 1.37  | 0.0108 |
| 102071_at   | 1429039_s_at | 1500034J01Rik       | RIKEN cDNA 1500034J01 gene                       | -1.58 | 0.29 | 1.07  | 0.5204 | -1.05 | 0.6672 | -1.05 | 0.5162 | 1.33  | 0.0782 |
| 102072_g_at | 1434281_at   | 1500034J01Rik       | RIKEN cDNA 1500034J01 gene                       | 1.22  | 0.07 | -1.05 | 0.455  | -1.06 | 0.3978 | -1.03 | 0.6726 | 1.11  | 0.4259 |
| 102073_at   | 1420755_a_at | Park2               | parkin                                           | 1.26  | 0.31 | -1.11 | 0.7389 | -1.31 | 0.3945 | 1.02  | 0.9306 | 1.61  | 0.1117 |
| 102074_at   | 1422285_at   | Otp                 | orthopedia homolog (Drosophila)                  | 1.23  | 0.47 | -1.16 | 0.1306 | -1.35 | 0.0118 | -1.33 | 0.0402 | -1.05 | 0.7868 |
| 102075_at   | 1427755_at   | Mcpt-ps1            | mast cell protease, pseudogene 1                 | -1.22 | 0.59 | 1.02  | 0.8906 | -1.27 | 0.0573 | -1.28 | 0.0212 | 1.07  | 0.8015 |
| 102077_at   | 1426173_at   | Cyp51               | Cytochrome P450, family 51                       | 1.01  | 0.99 | -1.27 | 0.2934 | -2.25 | 0.0087 | -1.47 | 0.0807 | 1.27  | 0.2615 |
| 102078_at   | 1419345_at   | Pth                 | parathyroid hormone                              | -1.67 | 0.19 | -1.14 | 0.72   | -1.37 | 0.4374 | -1.21 | 0.5579 | 4.29  | 0.0046 |
| 102079_at   | 1426190_at   | Aym1                | activator of yeast meiotic promoters 1           | -1.43 | 0.54 | 1.29  | 0.2271 | 1.13  | 0.5764 | -1.1  | 0.6961 | 1.48  | 0.1155 |
| 102080_at   | 1426038_at   | ---                 | ---                                              | 3.64  | 0    | -1.94 | 0.002  | -1.14 | 0.5654 | -1.73 | 0.0623 | -1.95 | 0.3067 |
| 102081_at   | 1421565_at   | Robo3               | roundabout homolog 3 (Drosophila)                | -4    | 0.11 | -1.24 | 0.1867 | 1.13  | 0.3871 | -1.1  | 0.3199 | 1.55  | 0.0919 |
| 102082_at   | 1421740_at   | Gnas                | GNAS (guanine nucleotide binding protein, ε      | -1.68 | 0.55 | 1.76  | 0.2851 | 1.05  | 0.8213 | 1.3   | 0.1727 | 1.62  | 0.2678 |
| 102083_at   | 1421779_at   | Rit2                | Ras-like without CAAX 2                          | 1.08  | 0.38 | -1.12 | 0.4048 | 1.03  | 0.7564 | -1.11 | 0.2433 | 1.07  | 0.5505 |
| 102084_f_at | 1452501_at   | Cyp2c38             | cytochrome P450, family 2, subfamily c, poly     | -1.18 | 0.42 | 1.1   | 0.5509 | 1.02  | 0.874  | -1.05 | 0.7131 | 2.83  | 0.0039 |
| 102085_at   | 1421399_at   | Insm1               | insulinoma-associated 1                          | -1.93 | 0.3  | 1.14  | 0.6357 | -1.06 | 0.8027 | -1.11 | 0.6816 | -1.87 | 0.1677 |
| 102086_r_at | 1448091_at   | D15Erd50e           | DNA segment, Chr 15, ERATO Doi 50, expr          | -6.14 | 0.07 | 1.54  | 0.0849 | 2.23  | 0.0376 | 1.28  | 0.2713 | -1.06 | 0.8869 |
| 102087_at   | 1452421_at   | Hoxa3               | homeo box A3                                     | 3.05  | 0    | -1.12 | 0.6881 | 1.44  | 0.2253 | 1.13  | 0.7133 | 1.31  | 0.3248 |
| 102088_at   | 1422227_at   | Klf12 /// D53003    | Kruppel-like factor 12 /// RIKEN cDNA D530       | -1.73 | 0.39 | -1.35 | 0.2773 | 1.2   | 0.4317 | -1    | 0.9897 | 2.26  | 0.1304 |
| 102089_at   | 1422148_at   | Matn3               | matrilin 3                                       | -2.53 | 0.15 | 1.24  | 0.2853 | 1.16  | 0.6158 | 1.28  | 0.5134 | 2.99  | 0.1076 |
| 102100_f_at | 1449633_s_at | C3230027I04Rik      | RIKEN cDNA C330027I04 gene                       | 4.22  | 0    | 1.09  | 0.8482 | 1.15  | 0.6713 | 1.6   | 0.1008 | 2.26  | 0.1959 |
| 102102_at   | 1447989_at   | ---                 | Transcribed locus, strongly similar to XP_34     | -1.43 | 0.02 | -1.12 | 0.4514 | 1.26  | 0.1709 | -1.36 | 0.1385 | -1.06 | 0.8519 |
| 102103_f_at | 1449726_at   | Txnl2               | thioredoxin-like 2                               | 2.17  | 0.09 | -1.15 | 0.0512 | 1.08  | 0.5356 | -1.2  | 0.0223 | 1.08  | 0.7696 |
| 102106_at   | 1459893_at   | C76472              | expressed sequence C76472                        | 1.35  | 0.49 | -1    | 0.9925 | -1.86 | 0.0444 | -1.46 | 0.1511 | 2.38  | 0.0539 |
| 102109_at   | 1460581_a_at | Rpl13 /// LOC28     | ribosomal protein L13 /// similar to 60S ribos   | 1.08  | 0.72 | 1.1   | 0.0447 | 1.24  | 0.0138 | 1.2   | 0.0191 | 1.4   | 0.0557 |
| 102111_f_at | 1447970_at   | C81363              | expressed sequence C81363                        | -1.32 | 0.51 | -1.21 | 0.2198 | 1.1   | 0.7014 | 1.01  | 0.9563 | 1.45  | 0.027  |
| 102112_s_at | 1419836_at   | ---                 | Transcribed locus                                | 3.11  | 0    | -1.11 | 0.2784 | -1.01 | 0.8712 | -1.21 | 0.0198 | 1.43  | 0.2165 |
| 102118_at   | 1459952_at   | Ankrd17             | DNA segment, Chr 5, Wayne State Universi         | -1.66 | 0.27 | 1.1   | 0.5439 | 1.05  | 0.7876 | -1.04 | 0.7842 | -1.18 | 0.4561 |
| 102123_at   | 1423141_at   | Lip1                | lysosomal acid lipase 1                          | 1.1   | 0.81 | -1.29 | 0.0141 | -1.58 | 0.0004 | -1.74 | 0      | -1.08 | 0.6647 |
| 102126_at   | 1448344_at   | Rps12 /// LOC4      | ribosomal protein S12 /// similar to ribosoma    | 1     | 1    | 1.02  | 0.6867 | 1.33  | 0.0044 | 1.22  | 0.0163 | 1.3   | 0.0641 |
| 102127_at   | 1445172_at   | Lgtn                | Ligatin                                          | 1.41  | 0.37 | 1.2   | 0.3933 | 1.4   | 0.2873 | 1.59  | 0.1442 | 1.86  | 0.0196 |
| 102130_f_at | 1457841_at   | ---                 | ---                                              | -1.21 | 0.37 | -1.03 | 0.6725 | 1.02  | 0.7017 | -1.01 | 0.8242 | 1.04  | 0.8162 |
| 102133_at   | 1459929_at   | C80731              | expressed sequence C80731                        | -1.5  | 0.25 | 1.06  | 0.6576 | 1.11  | 0.3226 | 1.09  | 0.6813 | 1.36  | 0.1693 |
| 102135_at   | 1442211_at   | C78893              | expressed sequence C78893                        | -1.68 | 0.01 | -1.39 | 0.0836 | -1.09 | 0.5533 | -1.19 | 0.2793 | 1.4   | 0.2077 |
| 102136_r_at | 1445047_at   | C79246              | expressed sequence C79246                        | -1.44 | 0.1  | -1.38 | 0.1011 | 1.1   | 0.5546 | 1.09  | 0.5421 | 1.58  | 0.2359 |
| 102138_at   | 1447276_at   | D13Erd37e           | DNA segment, Chr 13, ERATO Doi 37, expr          | -1.07 | 0.78 | 1.08  | 0.6451 | -1.05 | 0.5811 | -1.09 | 0.3849 | 1.77  | 0.2269 |
| 102139_at   | 1420105_at   | D13Erd205e          | DNA segment, Chr 13, ERATO Doi 205, exp          | -1.02 | 0.94 | -1.08 | 0.5771 | 1.1   | 0.5122 | -1.08 | 0.5611 | 1.12  | 0.6499 |
| 102140_at   | 1447287_at   | C77137              | expressed sequence C77137                        | -1.05 | 0.7  | 1.03  | 0.8845 | 1.07  | 0.6586 | -1.08 | 0.7435 | -1.05 | 0.8537 |
| 102142_r_at | 1449597_at   | LOC236874           | similar to odorant binding protein 1b            | -1.77 | 0.11 | -1.03 | 0.8457 | 1.07  | 0.6029 | -1.14 | 0.2614 | 1.85  | 0.1007 |
| 102143_at   | 1449631_at   | Eno3                | RIKEN cDNA 1700029K24 gene                       | -1.52 | 0.05 | -1.21 | 0.0933 | -1.09 | 0.4462 | -1.32 | 0.1139 | 1.25  | 0.3647 |
| 102146_at   | 1450225_at   | Insr                | insulin receptor                                 | -1.7  | 0.56 | -1.72 | 0.0622 | -2.02 | 0.0279 | -1.34 | 0.3074 | -1.19 | 0.5487 |
| 102147_at   | 1450572_at   | Akp3                | alkaline phosphatase 3, intestine, not Mn rec    | -1.51 | 0.6  | 1.49  | 0.1614 | 2.13  | 0.386  | 1.09  | 0.746  | 1     | 0.9905 |
| 102148_f_at | 1422406_at   | Ifna9               | interferon alpha family, gene 9                  | -1.68 | 0.44 | -1.21 | 0.2661 | -1.13 | 0.5425 | -1.37 | 0.1105 | 1.05  | 0.7487 |
| 102149_f_at | 1422404_x_at | Ifna1 /// Ifna2 /// | interferon alpha family, gene 1 /// interferon ; | -3.09 | 0    | -1.19 | 0.1328 | 1.09  | 0.4199 | -1.16 | 0.1822 | 1.43  | 0.5812 |
| 102150_f_at | 1450614_x_at | Ifna5               | interferon alpha family, gene 5                  | 1.93  | 0.28 | 1.85  | 0.079  | -1.07 | 0.8341 | 1.34  | 0.5772 | -1.17 | 0.4411 |
| 102157_f_at | 1427799_x_at | Igk-C /// Igk-V21   | immunoglobulin kappa chain, constant regio       | -4.37 | 0.12 | 1.63  | 0.0853 | 1.2   | 0.1461 | 2.27  | 0.135  | 2.17  | 0.0448 |
| 102161_f_at | 1422348_at   | H2-Q2               | histocompatibility 2, Q region locus 2           | 1.31  | 0.59 | 1.05  | 0.7345 | -1.27 | 0.0066 | 1.14  | 0.4445 | -1.52 | 0.2353 |
| 102164_at   | 1422328_at   | Gja10               | gap junction membrane channel protein alpt       | -1.37 | 0.36 | 1.07  | 0.4363 | 1.11  | 0.1736 | 1.07  | 0.3221 | 1.54  | 0.2643 |
| 102166_g_at | 1422380_at   | V1rb5               | vomer nasal 1 receptor, B5                       | -1.01 | 0.99 | -1.02 | 0.9336 | 1.25  | 0.3859 | 1.22  | 0.2893 | -1.32 | 0.608  |

|             |              |                |                                                   |       |      |       |        |       |        |       |        |       |        |
|-------------|--------------|----------------|---------------------------------------------------|-------|------|-------|--------|-------|--------|-------|--------|-------|--------|
| 102167_at   | 1422383_at   | V1rb6          | vomer nasal 1 receptor, B6                        | -1.5  | 0.43 | -1.07 | 0.4563 | 1.11  | 0.3646 | -1.09 | 0.4706 | 1.28  | 0.3983 |
| 102193_at   | 1435390_at   | ---            | ---                                               | -1.1  | 0.66 | -1.28 | 0.0115 | -1.05 | 0.5569 | -1.19 | 0.0561 | 1.23  | 0.2532 |
| 102194_at   | 1427085_at   | 2810432D09Rik  | RIKEN cDNA 2810432D09 gene                        | 1.01  | 0.93 | -1.13 | 0.0064 | -1.03 | 0.3757 | -1.19 | 0.0017 | 1.06  | 0.5636 |
| 102195_at   | 1448050_s_at | ---            | ---                                               | 5.96  | 0    | -1.06 | 0.7545 | -1.1  | 0.6684 | 1.34  | 0.1803 | -1.11 | 0.6657 |
| 102196_at   | 1449144_at   | Gna11          | guanine nucleotide binding protein, alpha 11      | 1.07  | 0.71 | 1     | 0.985  | 1.14  | 0.1866 | 1.17  | 0.0352 | -1.41 | 0.2794 |
| 102197_at   | 1418355_at   | Nucb2          | nucleobindin 2                                    | 1.16  | 0.63 | 1.3   | 0.478  | 1.24  | 0.7291 | 1.69  | 0.1783 | -1.1  | 0.7338 |
| 102198_at   | 1421038_a_at | Kcnn4          | potassium intermediate/small conductance c        | -1.76 | 0.28 | -1.64 | 0.0023 | -1.91 | 0.003  | -1.71 | 0.0006 | -1.07 | 0.7975 |
| 102199_at   | 1431125_a_at | Tarsl1         | threonyl-tRNA synthetase-like 1                   | 1.11  | 0.62 | 1.05  | 0.5693 | 1.08  | 0.3281 | 1.06  | 0.5011 | 1.05  | 0.8179 |
| 102200_at   | 1417828_at   | Aqp8           | aquaporin 8                                       | -1.89 | 0.24 | -2.44 | 0      | -1.36 | 0.0579 | -3.18 | 0      | -4.33 | 0      |
| 102201_s_at | 1421853_at   | Psen1          | presenilin 1                                      | 1.09  | 0.59 | -1.07 | 0.2905 | -1.11 | 0.0679 | -1.09 | 0.1119 | -1.02 | 0.8315 |
| 102202_s_at | 1420387_at   | Mpv17          | Mpv17 transgene, kidney disease mutant            | -1.32 | 0.44 | -1.06 | 0.5033 | -1.37 | 0.0083 | -1.21 | 0.0712 | 1.08  | 0.7141 |
| 102203_at   | 1449937_at   | Pp11r          | placental protein 11 related                      | -1.47 | 0.08 | 1.43  | 0.2808 | 1.69  | 0.1031 | 1.37  | 0.2361 | 1.03  | 0.9269 |
| 102204_at   | 1451715_at   | Mafb           | v-maf musculoaponeurotic fibrosarcoma onc         | 1.05  | 0.93 | -1.5  | 0.2329 | -2.01 | 0.0482 | -2.05 | 0.0448 | -1.38 | 0.6324 |
| 102205_at   | 1452461_a_at | MGC79224       | hypothetical LOC432486                            | -1.69 | 0.58 | -1.09 | 0.6451 | -1.68 | 0.0325 | 1.01  | 0.9805 | 1.1   | 0.8355 |
| 102206_at   | 1422787_at   | Fkbp1          | FK506 binding protein-like                        | 1.15  | 0.75 | 1.1   | 0.3502 | 1.15  | 0.1732 | 1.31  | 0.0271 | 1.3   | 0.3673 |
| 102207_at   | 1424544_at   | Nrbp2          | nuclear receptor binding protein 2                | 1.21  | 0.05 | 1.5   | 0.0006 | 1.15  | 0.428  | 1.52  | 0.0041 | 3.06  | 0.0094 |
| 102208_at   | 1449078_at   | St3gal6        | ST3 beta-galactoside alpha-2,3-sialyltransfe      | -1.02 | 0.95 | -2.88 | 0      | -1.29 | 0.1069 | -2.65 | 0      | 2.89  | 0.0155 |
| 102209_at   | 1417621_at   | Nfatc1         | nuclear factor of activated T-cells, cytoplasmic  | -2.55 | 0.3  | 1.24  | 0.0977 | 1     | 0.995  | 1.1   | 0.4914 | -1.25 | 0.5354 |
| 102210_at   | 1437651_a_at | Dtnb           | dystrobrevin, beta                                | 1     | 1    | 1.14  | 0.3534 | 1.15  | 0.3322 | 1.3   | 0.0608 | -1.05 | 0.8307 |
| 102212_at   | 1419018_at   | Psx1           | placenta specific homeobox 1                      | -1.46 | 0.59 | 1.12  | 0.2809 | 1.06  | 0.5166 | 1.12  | 0.3921 | 1.43  | 0.1137 |
| 102213_at   | 1419220_at   | ---            | ---                                               | -1.11 | 0.53 | -1.19 | 0.361  | 1.02  | 0.9415 | 1.01  | 0.9763 | 1.22  | 0.3679 |
| 102214_at   | 1423292_a_at | Prx            | periaxin                                          | -1.54 | 0.42 | 1.5   | 0.2864 | -1.16 | 0.5107 | -1.2  | 0.4957 | 1.45  | 0.1991 |
| 102215_at   | 1449407_at   | Cdv1           | carnitine deficiency-associated gene expres       | -2.06 | 0    | -1.04 | 0.5221 | -1.02 | 0.7776 | -1.05 | 0.4994 | 1.29  | 0.4199 |
| 102216_at   | 1418266_at   | Alox12b        | arachidonate 12-lipoxygenase, 12R type            | 1.03  | 0.97 | 1.53  | 0.1561 | 1.76  | 0.0821 | 1.76  | 0.0878 | -1.62 | 0.334  |
| 102217_at   | 1449514_at   | Gprk5          | G protein-coupled receptor kinase 5               | 1.07  | 0.76 | 1.05  | 0.6563 | 1.14  | 0.1772 | 1.15  | 0.1029 | 1.04  | 0.8105 |
| 102218_at   | 1450297_at   | Il6            | interleukin 6                                     | -1.07 | 0.9  | -1.96 | 0.1427 | -1.38 | 0.417  | 1.21  | 0.5961 | 1.68  | 0.4014 |
| 102219_at   | 1417332_at   | Rfx2           | regulatory factor X, 2 (influences HLA class      | -1.87 | 0.24 | 1.07  | 0.6989 | 1.39  | 0.0728 | 1.09  | 0.6406 | 1.32  | 0.4498 |
| 102220_at   | 1416899_at   | Utf1           | undifferentiated embryonic cell transcription     | 1.29  | 0.51 | -1.07 | 0.462  | -1.02 | 0.8236 | -1.13 | 0.0638 | 1.05  | 0.8171 |
| 102221_at   | 1419289_a_at | Syngn1         | synaptogyrin 1                                    | 1.17  | 0.71 | 1.3   | 0.3657 | 1.36  | 0.2375 | 1.94  | 0.0037 | 1.73  | 0.0784 |
| 102222_at   | 1427672_a_at | Utx            | ubiquitously transcribed tetratricopeptide rep    | 2.27  | 0.44 | 1.03  | 0.8141 | -1.06 | 0.4145 | -1.03 | 0.6254 | 1.03  | 0.8166 |
| 102223_at   | 1460732_a_at | Ppl            | periplakin                                        | 1.27  | 0.2  | 1.02  | 0.772  | -1.04 | 0.6206 | 1.01  | 0.9371 | 1.27  | 0.1359 |
| 102225_at   | 1434062_at   | Rabgap1l       | RAB GTPase activating protein 1-like              | 1.12  | 0.39 | 1.19  | 0.0258 | 1.14  | 0.1785 | 1.11  | 0.0796 | 1.2   | 0.2191 |
| 102227_g_at | 1460248_at   | Cpxm2          | carboxypeptidase X 2 (M14 family)                 | -1.23 | 0.75 | -1.19 | 0.3435 | 1.12  | 0.5322 | -1.06 | 0.7278 | 1.52  | 0.2296 |
| 102229_at   | 1423581_at   | Nmt2           | N-myristoyltransferase 2                          | 2.5   | 0    | 1.52  | 0.1279 | 1.45  | 0.1446 | 1.42  | 0.1286 | 1.15  | 0.8502 |
| 102230_at   | 1449954_at   | Hyal1 /// Nat6 | hyaluronidase 1 /// N-acetyltransferase 6         | -1.53 | 0.24 | -1.18 | 0.2405 | -1.49 | 0.012  | -1.82 | 0.0012 | -1.55 | 0.3034 |
| 102231_at   | 1419295_at   | ---            | ---                                               | -1.9  | 0.04 | -1.06 | 0.3806 | -1.03 | 0.5708 | -1.13 | 0.0754 | 1.08  | 0.5641 |
| 102232_at   | 1452765_at   | Slc39a9        | solute carrier family 39 (zinc transporter), me   | 1.18  | 0.14 | -1.18 | 0.003  | 1.02  | 0.8383 | -1.13 | 0.0093 | -1.02 | 0.8617 |
| 102235_at   | 1434777_at   | Lmyc1          | lung carcinoma myc related oncogene 1             | 1.23  | 0.47 | 1.64  | 0.0044 | 1.45  | 0.1615 | 1.93  | 0.0106 | 2.84  | 0.0081 |
| 102237_at   | 1417597_at   | Cd28           | CD28 antigen                                      | 1.05  | 0.89 | 1.42  | 0.0491 | 1.27  | 0.254  | 1.2   | 0.444  | 1.25  | 0.4914 |
| 102238_at   | 1450164_at   | Ascl1          | achaete-scute complex homolog-like 1 (Dros        | -1.04 | 0.94 | -1.36 | 0.2448 | -1.3  | 0.2731 | -1.03 | 0.8911 | 1.47  | 0.4521 |
| 102239_at   | 1418133_at   | Bcl3           | B-cell leukemia/lymphoma 3                        | 1.37  | 0.46 | 1.09  | 0.8046 | 1.02  | 0.9278 | 1.28  | 0.4824 | -2.06 | 0.3102 |
| 102241_f_at | 1425229_a_at | Tcf7l2         | transcription factor 7-like 2, T-cell specific, H | 1.53  | 0.27 | -1.07 | 0.4718 | -1.16 | 0.1589 | -1.18 | 0.0321 | -1.23 | 0.4763 |
| 102242_at   | 1460662_at   | Per3           | period homolog 3 (Drosophila)                     | -1.5  | 0.03 | 1.01  | 0.9188 | 1.13  | 0.3372 | 1.09  | 0.5585 | -1.03 | 0.7098 |
| 102243_at   | 1419474_a_at | Ehf            | ets homologous factor                             | 1.56  | 0.36 | 1.01  | 0.9731 | -1.04 | 0.8797 | -1.55 | 0.2041 | 1.58  | 0.4085 |
| 102244_at   | 1418559_at   | Tesp1          | testicular serine protease 1                      | 1.01  | 0.98 | -1.04 | 0.7796 | -1.07 | 0.7322 | -1.14 | 0.508  | 1.14  | 0.7315 |
| 102247_at   | 1420971_at   | Ubr1           | ubiquitin protein ligase E3 component n-recc      | -1.66 | 0.48 | -1.06 | 0.5487 | -1.06 | 0.6749 | 1.11  | 0.1761 | -1.21 | 0.2494 |
| 102249_at   | 1419148_at   | Avil           | advillin                                          | -1.19 | 0.39 | -1.2  | 0.6468 | -1.4  | 0.3593 | -1.82 | 0.1224 | 1.95  | 0.1523 |
| 102250_at   | 1449508_at   | Il27ra         | interleukin 27 receptor, alpha                    | -1.11 | 0.51 | -1.09 | 0.3151 | -1.06 | 0.3974 | -1.09 | 0.2501 | 1.31  | 0.1554 |
| 102251_at   | 1418935_at   | Trpm1          | transient receptor potential cation channel, s    | -1.37 | 0.13 | -1.12 | 0.4208 | 1.12  | 0.4214 | -1.19 | 0.1982 | 1     | 0.997  |
| 102252_at   | 1421950_at   | Pfdn2          | prefoldin 2                                       | 2.16  | 0.11 | 1.19  | 0.0264 | 1.1   | 0.3655 | 1.06  | 0.505  | 1.21  | 0.2023 |
| 102253_at   | 1425160_at   | AF067063       | cDNA sequence AF067063                            | -1.14 | 0.38 | -1.21 | 0.2175 | -1    | 0.9772 | -1.01 | 0.9316 | 1.04  | 0.8864 |
| 102255_at   | 1418674_at   | Osmr           | oncostatin M receptor                             | 1.15  | 0.49 | 1.03  | 0.7854 | 1.09  | 0.5796 | 1.07  | 0.5511 | 1.53  | 0.0282 |
| 102256_at   | 1418755_at   | Tbx15          | T-box 15                                          | 1.18  | 0.38 | -1.22 | 0.3405 | -1.23 | 0.2522 | -1.08 | 0.6608 | 1.29  | 0.2452 |



|             |              |             |                                                  |       |      |       |        |       |        |       |        |       |        |
|-------------|--------------|-------------|--------------------------------------------------|-------|------|-------|--------|-------|--------|-------|--------|-------|--------|
| 102257_at   | 1421233_at   | Pknox1      | Pbx/knotted 1 homeobox                           | -1.19 | 0.15 | -1.2  | 0.083  | -1.23 | 0.0711 | -1.18 | 0.0734 | 1.58  | 0.0419 |
| 102258_at   | 1422723_at   | Stra6       | stimulated by retinoic acid gene 6               | 1.04  | 0.94 | -1.5  | 0.3237 | -1.05 | 0.9063 | -1.47 | 0.3388 | 2.7   | 0.2451 |
| 102259_at   | 1420816_at   | Ywhag       | 3-monooxygenase/tryptophan 5-monooxyge           | 1.11  | 0.88 | -1.07 | 0.6787 | -1.33 | 0.2489 | -1.63 | 0.037  | 1.03  | 0.9489 |
| 102260_at   | 1420399_at   | Gfi1b       | growth factor independent 1B                     | -1.52 | 0.06 | -1.38 | 0.4855 | -1.24 | 0.5965 | -1.13 | 0.7671 | 1.72  | 0.2552 |
| 102262_r_at | 1422866_at   | Col13a1     | procollagen, type XIII, alpha 1                  | 1.46  | 0.4  | 1.09  | 0.654  | 1.46  | 0.0242 | -1.08 | 0.6807 | 1.69  | 0.0286 |
| 102264_at   | 1418612_at   | Slnf1       | schlafen 1                                       | -1.52 | 0.21 | 1.25  | 0.3166 | -1.03 | 0.7982 | 1.55  | 0.2395 | -1.05 | 0.7895 |
| 102265_at   | 1419150_at   | Myf6        | myogenic factor 6                                | -4.72 | 0.01 | -1.4  | 0.2679 | 1.39  | 0.1799 | 1.32  | 0.3645 | 2.37  | 0.0058 |
| 102266_at   | 1422728_at   | Inha        | inhibin alpha                                    | 1.33  | 0.49 | -1.11 | 0.6258 | 1.07  | 0.8269 | 1.04  | 0.8865 | 1.06  | 0.739  |
| 102267_at   | 1419138_at   | B3galt4     | UDP-Gal:betaGalNAc beta 1,3-galactosyltra        | 1.08  | 0.77 | 1.03  | 0.795  | 1.13  | 0.1295 | -1    | 0.9706 | 1.22  | 0.592  |
| 102268_at   | 1429124_s_at | Tceb3bp1    | transcription elongation factor B polypeptide    | -1.11 | 0.63 | 1.13  | 0.1073 | 1.04  | 0.5019 | 1.02  | 0.7305 | 1.33  | 0.0537 |
| 102271_at   | 1460739_at   | D11Bwg0280e | DNA segment, Chr 11, Brigham & Women's           | 1.13  | 0.54 | -1.11 | 0.018  | -1.08 | 0.1978 | -1.07 | 0.0881 | 1.03  | 0.6676 |
| 102272_at   | 1420066_s_at | Cd160       | CD160 antigen                                    | -1.78 | 0.37 | 1.09  | 0.7168 | 1.04  | 0.8888 | -1.15 | 0.5592 | 1.64  | 0.4168 |
| 102273_at   | 1449870_a_at | Atp6v0a2    | ATPase, H+ transporting, lysosomal V0 subu       | 1.3   | 0.17 | 1.21  | 0.0017 | 1.13  | 0.0283 | 1.16  | 0.0064 | -1.19 | 0.231  |
| 102274_at   | 1419297_at   | H2-Oa       | histocompatibility 2, O region alpha locus       | -1.09 | 0.87 | 1.22  | 0.3719 | -1.1  | 0.6925 | 1.46  | 0.1006 | 1.24  | 0.7208 |
| 102275_at   | 1420943_at   | Zfp185      | zinc finger protein 185                          | -1.45 | 0.38 | 1.71  | 0.1193 | 1.11  | 0.5372 | 1.12  | 0.4538 | 3.27  | 0.2802 |
| 102278_at   | 1450657_at   | Ppie        | peptidylprolyl isomerase E (cyclophilin E)       | 2.55  | 0.22 | 1.16  | 0.4821 | -1.1  | 0.7162 | 1.25  | 0.2895 | 1.54  | 0.3405 |
| 102279_at   | 1426971_at   | Ube1l       | ubiquitin-activating enzyme E1-like              | -1.16 | 0.25 | 1.01  | 0.9541 | -1.28 | 0.0078 | 1.04  | 0.8547 | -1.49 | 0.0844 |
| 102280_at   | 1449249_at   | Pcdh7       | protocadherin 7                                  | -1    | 1    | -1.21 | 0.5281 | 1.01  | 0.9772 | 1.23  | 0.4915 | 2.44  | 0.2979 |
| 102282_g_at | 1452389_at   | Tnfrsf7     | tumor necrosis factor receptor superfamily, r    | -1.51 | 0.07 | 1.06  | 0.6481 | -1    | 0.9997 | -1.24 | 0.0671 | 1.44  | 0.0358 |
| 102283_at   | 1418057_at   | Tiam1       | T-cell lymphoma invasion and metastasis 1        | -1.47 | 0.05 | -1.12 | 0.2096 | 1.05  | 0.6861 | 1.07  | 0.5996 | 1.17  | 0.3754 |
| 102284_at   | 1419677_at   | Masp1       | mannan-binding lectin serine protease 1          | -1.4  | 0.08 | -1.57 | 0      | -1.03 | 0.7665 | -1.48 | 0      | -1.75 | 0.0124 |
| 102285_at   | 1421309_at   | Mgmt        | O-6-methylguanine-DNA methyltransferase          | 1.02  | 0.94 | -1.25 | 0.1282 | -1.15 | 0.3127 | -1.34 | 0.0743 | -1.32 | 0.5077 |
| 102286_at   | 1426602_at   | Araf        | v-raf murine sarcoma 3611 viral oncogene h       | 1.19  | 0.61 | -1.06 | 0.5734 | -1.05 | 0.4941 | -1.12 | 0.1334 | 1.02  | 0.9642 |
| 102287_at   | 1426396_at   | Cd3z        | CD3 antigen, zeta polypeptide                    | -1.14 | 0.77 | 1.4   | 0.1132 | 1.19  | 0.4315 | 1.59  | 0.0103 | 1.3   | 0.4187 |
| 102288_at   | 1426079_at   | Cd3z        | CD3 antigen, zeta polypeptide                    | -2.32 | 0.12 | 1.24  | 0.4792 | -1.04 | 0.9089 | 1.52  | 0.165  | -1.47 | 0.4917 |
| 102290_at   | 1422699_at   | Alox12      | arachidonate 12-lipoxygenase                     | -1.45 | 0.32 | -1.01 | 0.9518 | 1.05  | 0.7267 | -1.02 | 0.885  | 1.17  | 0.6753 |
| 102291_at   | 1427393_at   | F9          | coagulation factor IX                            | -1.26 | 0.28 | -1.27 | 0.0003 | -1.02 | 0.8366 | -1.16 | 0.0094 | -1.71 | 0.0005 |
| 102292_at   | 1449519_at   | Gadd45a     | growth arrest and DNA-damage-inducible 4f        | 2.55  | 0.05 | -1.23 | 0.1059 | -1.32 | 0.1613 | -1.54 | 0.0009 | -4.5  | 0.0001 |
| 102293_at   | 1421303_at   | Zfp1a1      | zinc finger protein, subfamily 1A, 1 (Ikaros)    | -1.15 | 0.49 | -1.04 | 0.8131 | -1.31 | 0.3292 | -1.01 | 0.9697 | -1.41 | 0.2244 |
| 102295_at   | 1417680_at   | Kcna5       | potassium voltage-gated channel, shaker-re       | 1.22  | 0.59 | 1.37  | 0.1725 | 1.1   | 0.5401 | 1.23  | 0.2322 | 1.79  | 0.1003 |
| 102296_at   | 1448312_at   | Pcsk2       | proprotein convertase subtilisin/kexin type 2    | 1.09  | 0.83 | 1.35  | 0.3183 | 1.57  | 0.0762 | 1.58  | 0.0535 | 1.79  | 0.2814 |
| 102297_at   | 1448920_at   | Zfp535      | zinc finger protein 535                          | -1.4  | 0.63 | -1.15 | 0.6192 | -1.34 | 0.3213 | 1.35  | 0.2531 | 1.13  | 0.8025 |
| 102298_at   | 1419675_at   | Ngfb        | nerve growth factor, beta                        | 2.02  | 0.14 | 1.34  | 0.2071 | 1.13  | 0.6317 | 1.64  | 0.0323 | -1.81 | 0.1456 |
| 102300_at   | 1449331_a_at | Rapsn       | receptor-associated protein of the synapse       | -1.8  | 0.03 | -1.21 | 0.0009 | -1.15 | 0.0306 | -1.22 | 0.0491 | 1.11  | 0.3682 |
| 102301_at   | 1418556_at   | Capza3      | capping protein (actin filament) muscle Z-lin    | -3.56 | 0.11 | 1.38  | 0.3571 | 1.7   | 0.0852 | 1.06  | 0.8682 | 1.29  | 0.588  |
| 102302_at   | 1427153_at   | Bckdhd      | branched chain ketoacid dehydrogenase E1         | 1.29  | 0.24 | 1.09  | 0.024  | 1.11  | 0.0053 | 1.26  | 0      | -1.06 | 0.5058 |
| 102304_f_at | 1417363_at   | Zfp61       | zinc finger protein 61                           | 1.34  | 0.53 | 1.25  | 0.3577 | 1.15  | 0.6174 | 1.56  | 0.0334 | -1    | 0.9967 |
| 102305_at   | 1424146_at   | Gpr3711     | G protein-coupled receptor 37-like 1             | -1.45 | 0.07 | -1.09 | 0.278  | 1.1   | 0.3211 | 1.08  | 0.3117 | 2.55  | 0.006  |
| 102307_at   | 1418139_at   | Dcx         | doublecortin                                     | -2.08 | 0.17 | 1.01  | 0.9432 | 1.06  | 0.7548 | -1.18 | 0.2269 | 1.97  | 0.066  |
| 102308_at   | 1449008_at   | Tulp3       | tubby-like protein 3                             | -1.52 | 0.11 | 1.06  | 0.5542 | 1.12  | 0.2583 | 1.02  | 0.7671 | 1.44  | 0.0554 |
| 102309_at   | 1419181_at   | Zfp326      | zinc finger protein 326                          | -1    | 0.99 | -1.05 | 0.5865 | -1.15 | 0.2968 | -1.03 | 0.707  | 1.01  | 0.9543 |
| 102311_at   | 1419720_at   | Gp9         | glycoprotein 9 (platelet)                        | -1.61 | 0.23 | -1.3  | 0.1635 | 1.31  | 0.3064 | -1.23 | 0.1535 | 1.02  | 0.9256 |
| 102313_at   | 1420499_at   | Gch1        | GTP cyclohydrolase 1                             | 1.88  | 0    | -1.05 | 0.43   | 1.45  | 0.0008 | 1.17  | 0.0022 | -1.35 | 0.1188 |
| 102314_at   | 1415958_at   | Slc2a4      | solute carrier family 2 (facilitated glucose tra | 2.53  | 0.11 | 1.08  | 0.8271 | -1.24 | 0.5873 | 1.39  | 0.3069 | 1.1   | 0.3243 |
| 102315_at   | 1423884_at   | Tex292      | testis expressed gene 292                        | 1.19  | 0.38 | 1.18  | 0.0129 | 1.35  | 0.0003 | 1.25  | 0.0003 | 1.28  | 0.0209 |
| 102316_at   | 1418671_at   | Capn5       | calpain 5                                        | -1.2  | 0.32 | 1.09  | 0.203  | -1.02 | 0.7885 | 1.05  | 0.527  | 1.43  | 0.2063 |
| 102317_at   | 1422895_at   | Vamp4       | vesicle-associated membrane protein 4            | -1.03 | 0.72 | 1.28  | 0.0544 | 1.03  | 0.8069 | 1.12  | 0.3775 | 1.08  | 0.6789 |
| 102318_at   | 1419186_a_at | St8sia4     | ST8 alpha-N-acetyl-neuraminide alpha-2,8-s       | 1.5   | 0.18 | 1.26  | 0.2384 | 1.02  | 0.8646 | 1.56  | 0.0599 | 1.65  | 0.3691 |
| 102319_at   | 1421797_a_at | Snx12       | sorting nexin 12                                 | 1.98  | 0.17 | -1.03 | 0.7309 | -1.17 | 0.1336 | -1.14 | 0.2188 | 1.29  | 0.6074 |
| 102320_at   | 1454807_a_at | Snx12       | sorting nexin 12                                 | -1.12 | 0.48 | 1.21  | 0.3692 | 1.27  | 0.3605 | 1.24  | 0.3733 | 1.65  | 0.1545 |
| 102321_at   | 1418128_at   | Adcy6       | adenylate cyclase 6                              | 1.18  | 0.34 | 1.71  | 0.0002 | 1.37  | 0.0133 | 1.83  | 0      | 1.41  | 0.0418 |
| 102322_at   | 1416308_at   | Ugdh        | UDP-glucose dehydrogenase                        | 1.08  | 0.67 | 1.1   | 0.2767 | 1.13  | 0.2232 | 1.25  | 0.0034 | -1.58 | 0.0005 |
| 102323_at   | 1416997_a_at | Hap1        | huntingtin-associated protein 1                  | -1.75 | 0.06 | 1.11  | 0.5173 | -1.08 | 0.6238 | -1.18 | 0.182  | 1.24  | 0.2208 |

|             |              |                 |                                              |       |      |       |        |       |        |       |        |       |        |
|-------------|--------------|-----------------|----------------------------------------------|-------|------|-------|--------|-------|--------|-------|--------|-------|--------|
| 102324_at   | 1417934_at   | Dnajc4          | DnaJ (Hsp40) homolog, subfamily C, memb      | 1.3   | 0.04 | -1.04 | 0.5391 | -1.02 | 0.7531 | -1    | 0.9813 | 1.16  | 0.2524 |
| 102326_at   | 1448561_at   | Ncf2            | neutrophil cytosolic factor 2                | 1.36  | 0.31 | 1.74  | 0.2625 | -1.06 | 0.7713 | 1.98  | 0.2288 | 2.27  | 0.0447 |
| 102327_at   | 1449396_at   | Aoc3            | amine oxidase, copper containing 3           | -1.29 | 0.47 | -1.27 | 0.0819 | -1.13 | 0.2548 | -1.36 | 0.0746 | 1.82  | 0.0319 |
| 102328_at   | 1424552_at   | Casp8           | caspase 8                                    | -1.17 | 0.5  | -1.09 | 0.3303 | 1.09  | 0.5794 | 1.1   | 0.3271 | -1.12 | 0.5744 |
| 102329_at   | 1418976_s_at | Cideb           | cell death-inducing DNA fragmentation facto  | -1.2  | 0.1  | -1.17 | 0.001  | -1.05 | 0.2456 | -1.19 | 0.0016 | -1.38 | 0.0029 |
| 102330_at   | 1418204_s_at | Aif1            | allograft inflammatory factor 1              | 2.45  | 0.02 | 1.31  | 0.5978 | -1.05 | 0.8088 | 1.89  | 0.2493 | 1.38  | 0.0086 |
| 102331_at   | 1428372_at   | St5             | suppression of tumorigenicity 5              | -1.38 | 0.24 | -1.15 | 0.062  | -2.14 | 0.001  | -1.45 | 0.0233 | 1.2   | 0.5247 |
| 102332_at   | 1448370_at   | Ulk1            | Unc-51 like kinase 1 (C. elegans)            | 1.14  | 0.27 | -1.07 | 0.2967 | 1.22  | 0.0458 | 1.02  | 0.7741 | -1.17 | 0.038  |
| 102333_at   | 1427226_at   | Epn2            | epsin 2                                      | -1.18 | 0.29 | -1.03 | 0.488  | 1.01  | 0.9417 | 1.1   | 0.1302 | 1.24  | 0.0203 |
| 102334_at   | 1416333_at   | Dok2            | docking protein 2                            | 1.54  | 0.07 | 1.22  | 0.0765 | 1.18  | 0.0834 | 1.31  | 0.0683 | 2.57  | 0.0236 |
| 102335_at   | 1455896_a_at | Kcnk1           | potassium channel, subfamily K, member 1     | -1.8  | 0.01 | -1    | 0.9762 | 1.06  | 0.7129 | -1.1  | 0.6059 | 1.31  | 0.5361 |
| 102336_at   | 1448396_at   | D1Bwg0491e      | DNA segment, Chr 1, Brigham & Women's C      | -1.06 | 0.63 | 1.11  | 0.1734 | 1.19  | 0.143  | 1.32  | 0.0096 | -1.02 | 0.7926 |
| 102337_s_at | 1455332_x_at | Fcgr2b          | Fc receptor, IgG, low affinity IIb           | 1.34  | 0.04 | -1.1  | 0.3207 | 1.1   | 0.3449 | 1.02  | 0.9169 | 1.15  | 0.3005 |
| 102338_at   | 1449403_at   | Pde9a           | phosphodiesterase 9A                         | 1.21  | 0.54 | -1.37 | 0.2508 | 1.18  | 0.529  | -3.43 | 0.0051 | -1.93 | 0.0238 |
| 102340_at   | 1423595_at   | Mina            | myc induced nuclear antigen                  | 1.19  | 0.35 | 1.06  | 0.5449 | 1.16  | 0.4146 | 1.07  | 0.435  | 1.16  | 0.4647 |
| 102341_at   | 1449006_at   | Gla             | galactosidase, alpha                         | -2.1  | 0.01 | 1.5   | 0.1853 | 1.27  | 0.4127 | 1.45  | 0.2166 | -1.11 | 0.8665 |
| 102342_at   | 1422455_s_at | Nsf             | N-ethylmaleimide sensitive fusion protein    | -1.85 | 0.51 | -1.08 | 0.6981 | 1.07  | 0.6799 | 1.14  | 0.4763 | 1.12  | 0.6641 |
| 102343_at   | 1417100_at   | Cd320           | CD320 antigen                                | -1.2  | 0.08 | -1.09 | 0.3745 | -1.06 | 0.4697 | 1.06  | 0.4929 | 1.77  | 0.1422 |
| 102344_s_at | 1424531_a_at | Tcea3           | transcription elongation factor A (SII), 3   | 3.21  | 0.03 | 1.2   | 0.033  | -1.04 | 0.6737 | 1.16  | 0.1775 | 1.47  | 0.0098 |
| 102345_at   | 1417638_at   | Lefty1          | left right determination factor 1            | -1.16 | 0.67 | -1.18 | 0.2128 | -1.14 | 0.2093 | -1.41 | 0.0075 | 1.3   | 0.5248 |
| 102348_at   | 1424609_a_at | BC003993 /// LC | cDNA sequence BC003993 /// hypothetical l    | 1.11  | 0.86 | 1.75  | 0.048  | -1.8  | 0.0178 | 1.15  | 0.6422 | 1.74  | 0.0673 |
| 102350_at   | 1427449_a_at | Adprhl2         | ADP-ribosylhydrolase like 2                  | 2.64  | 0.25 | 1.51  | 0.1587 | 1.24  | 0.4466 | 1.43  | 0.2163 | 2.42  | 0.076  |
| 102351_at   | 1448730_at   | Cpa3            | carboxypeptidase A3, mast cell               | 2.5   | 0.05 | -1.22 | 0.5075 | -1.14 | 0.6435 | -1.25 | 0.4717 | -1.19 | 0.6837 |
| 102352_at   | 1418195_at   | Galnt10         | UDP-N-acetyl-alpha-D-galactosamine:polyp     | 1.3   | 0.5  | -1.13 | 0.1757 | -1.41 | 0.0012 | -1.58 | 0.002  | -1.44 | 0.3147 |
| 102353_at   | 1450678_at   | ---             | ---                                          | 2.58  | 0.03 | 2.47  | 0.2174 | 1.08  | 0.7526 | 3.43  | 0.1936 | 1.25  | 0.6603 |
| 102354_at   | 1423809_at   | Tcf19           | transcription factor 19                      | 1.65  | 0.3  | -1.08 | 0.753  | 1.07  | 0.6994 | 1.21  | 0.3217 | 1.05  | 0.7106 |
| 102356_at   | 1448418_s_at | Wdr23           | WD repeat domain 23                          | 1.24  | 0.17 | 1.01  | 0.7742 | -1.22 | 0.0073 | -1.05 | 0.3909 | -1.32 | 0.0022 |
| 102357_at   | 1454977_at   | AU020772        | expressed sequence AU020772                  | 1.85  | 0.25 | 1.97  | 0.0344 | 2.15  | 0.0084 | 2.11  | 0.0068 | -1.29 | 0.3946 |
| 102360_at   | 1434087_at   | Mthfr           | 5,10-methylenetetrahydrofolate reductase     | -1.35 | 0.57 | 1.3   | 0.4658 | 1.23  | 0.4206 | 1.6   | 0.2105 | 1.42  | 0.6311 |
| 102363_r_at | 1415899_at   | Junb            | Jun-B oncogene                               | 1.58  | 0.4  | 1.82  | 0.0335 | -1.03 | 0.8678 | 1.59  | 0.0119 | 1.02  | 0.842  |
| 102364_at   | 1449117_at   | Jund1           | Jun proto-oncogene related gene d1           | -1.13 | 0.62 | 1.06  | 0.4444 | 1.05  | 0.5425 | 1.03  | 0.7426 | 1.3   | 0.1443 |
| 102366_at   | 1449182_at   | Retn            | resistin                                     | -1.46 | 0.28 | -1.74 | 0.0835 | -1.48 | 0.1826 | -1.73 | 0.0876 | 1.29  | 0.0478 |
| 102368_at   | 1427934_at   | 2610208E05Rik   | RIKEN cDNA 2610208E05 gene                   | 1.55  | 0.12 | -1.07 | 0.4041 | -1.26 | 0.036  | -1.06 | 0.3812 | -1.26 | 0.0339 |
| 102370_at   | 1434642_at   | Dhrs8           | dehydrogenase/reductase (SDR family) mer     | 1.11  | 0.68 | 1.65  | 0      | 1.47  | 0      | 1.99  | 0      | 1.76  | 0.0009 |
| 102371_at   | 1416505_at   | Nr4a1           | nuclear receptor subfamily 4, group A, mem1  | 6.56  | 0.1  | 3.78  | 0.0994 | 1.32  | 0.2358 | 2.3   | 0.0078 | 1.71  | 0.2797 |
| 102372_at   | 1424305_at   | Igj             | immunoglobulin joining chain                 | -1.18 | 0.18 | 1.52  | 0.0101 | 1.06  | 0.7117 | 1.17  | 0.1612 | 1.77  | 0.0326 |
| 102373_at   | 1448649_at   | Enpep           | glutamyl aminopeptidase                      | -1.84 | 0.06 | -1.35 | 0.0573 | -1.22 | 0.259  | -1.78 | 0.0018 | -1.49 | 0.0023 |
| 102374_at   | 1434027_at   | Dscr1l2         | Down syndrome critical region gene 1-like 2  | 3.27  | 0.16 | 1.11  | 0.4826 | 1.54  | 0.3239 | 1.26  | 0.1714 | 1.36  | 0.0899 |
| 102375_at   | 1451722_s_at | ---             | ---                                          | 1.01  | 0.99 | -1.09 | 0.5364 | -1.03 | 0.8196 | -1.05 | 0.7145 | 1.25  | 0.4891 |
| 102376_r_at | 1419084_a_at | Pcp2            | Purkinje cell protein 2 (L7)                 | -1.13 | 0.8  | 1.8   | 0.0055 | 1.49  | 0.1106 | 1.51  | 0.1334 | 2.14  | 0.0047 |
| 102378_at   | 1417644_at   | Sspn            | sarcospan                                    | -1.38 | 0.21 | 1.2   | 0.6042 | -1.15 | 0.6217 | 1.6   | 0.0645 | 2.95  | 0.0465 |
| 102379_at   | 1448855_at   | Rassf1          | Ras association (RalGDS/AF-6) domain fam     | 1.82  | 0.09 | -1.06 | 0.8154 | 1.37  | 0.3141 | 2.51  | 0.0005 | 1.5   | 0.0458 |
| 102380_s_at | 1450209_at   | Hoxd4           | homeo box D4                                 | 1.39  | 0.31 | -1.33 | 0.1835 | -1.45 | 0.1342 | -1.08 | 0.7418 | -1.24 | 0.4003 |
| 102381_at   | 1433531_at   | Acsl4           | acyl-CoA synthetase long-chain family mem    | 1.09  | 0.83 | 1.08  | 0.3972 | -1.05 | 0.6541 | 1.46  | 0.0037 | 1.21  | 0.3563 |
| 102382_at   | 1425099_a_at | Arntl           | aryl hydrocarbon receptor nuclear translocat | -2.4  | 0.04 | -1.12 | 0.3887 | -1.5  | 0.0215 | -1.38 | 0.0454 | -1.23 | 0.5821 |
| 102383_at   | 1433639_at   | 5730593F17Rik   | RIKEN cDNA 5730593F17 gene                   | 1.3   | 0.53 | 1.07  | 0.5466 | 1.11  | 0.5742 | 1.07  | 0.6168 | 1.6   | 0.1839 |
| 102384_at   | 1430526_a_at | Smarca2         | SWI/SNF related, matrix associated, actin dr | 1.28  | 0.16 | -1.01 | 0.8947 | -1.18 | 0.0976 | 1.17  | 0.0815 | 1.2   | 0.3063 |
| 102385_at   | 1428389_s_at | Wdr43           | WD repeat domain 43                          | -1.11 | 0.67 | -1.08 | 0.3483 | 1.06  | 0.3362 | -1.05 | 0.6486 | 1.15  | 0.3816 |
| 102387_at   | 1424377_at   | BC003885        | cDNA sequence BC003885                       | 1.07  | 0.86 | 1.01  | 0.9195 | 1.07  | 0.3985 | 1.09  | 0.2155 | -1.15 | 0.5374 |
| 102389_s_at | 1423537_at   | Gap43           | growth associated protein 43                 | -2.11 | 0.03 | -1.07 | 0.7096 | 1.02  | 0.9099 | -1.24 | 0.25   | 1.16  | 0.7008 |
| 102395_at   | 1417133_at   | Pmp22           | peripheral myelin protein                    | 1.28  | 0.17 | -1.11 | 0.4022 | -1.07 | 0.5718 | -1.19 | 0.1638 | 1.22  | 0.1663 |
| 102396_at   | 1423068_at   | 4930553F24Rik   | RIKEN cDNA 4930553F24Rik                     | -1.06 | 0.84 | 1.03  | 0.7348 | -1    | 0.9973 | 1.03  | 0.7383 | 1.1   | 0.5855 |
| 102397_at   | 1418582_at   | Cbfa2t3h        | core-binding factor, runt domain, alpha subu | 1.29  | 0.7  | 1.35  | 0.1205 | 1.23  | 0.4725 | -1.03 | 0.9229 | 1.26  | 0.4656 |

|             |              |              |                                                |       |      |       |        |       |        |       |        |       |        |
|-------------|--------------|--------------|------------------------------------------------|-------|------|-------|--------|-------|--------|-------|--------|-------|--------|
| 102398_at   | 1416990_at   | Rxbp         | retinoid X receptor beta                       | -1.26 | 0.4  | -1.17 | 0.0686 | -1.02 | 0.8065 | -1.26 | 0.038  | 1.18  | 0.6094 |
| 102399_at   | 1429359_s_at | Rbpms        | RNA binding protein gene with multiple splic   | -1.08 | 0.82 | 1.08  | 0.2545 | -1.26 | 0.0217 | 1.12  | 0.1263 | 1.25  | 0.5039 |
| 102400_at   | 1433663_s_at | LOC433702    | nuclear cap binding protein subunit 1, 80kD:   | -1.32 | 0.16 | -1.23 | 0.0787 | 1.11  | 0.3456 | -1.06 | 0.6044 | -1.09 | 0.6695 |
| 102401_at   | 1448436_a_at | Irf1         | interferon regulatory factor 1                 | -1.26 | 0.08 | 1.43  | 0.2624 | -1.38 | 0.0123 | 1.58  | 0.2397 | -1.14 | 0.5702 |
| 102403_at   | 1416575_at   | Cdc45l       | cell division cycle 45 homolog (S. cerevisiae  | 1.56  | 0.29 | 1.08  | 0.7172 | -1    | 0.9965 | 1.21  | 0.2815 | 1.6   | 0.007  |
| 102405_at   | 1460219_at   | Mag          | myelin-associated glycoprotein                 | -1.76 | 0.03 | 1.4   | 0.0062 | 1.33  | 0.0113 | 1.2   | 0.0374 | -1.05 | 0.8362 |
| 102408_g_at | 1449456_a_at | Mcpt5        | mast cell protease 5                           | 1.04  | 0.82 | 1.18  | 0.1643 | 1.18  | 0.1504 | 1.04  | 0.6856 | 1.33  | 0.3027 |
| 102409_at   | 1448703_at   | Lsm8         | LSM8 homolog, U6 small nuclear RNA asso        | 1.57  | 0.18 | 1.36  | 0.0009 | 1.19  | 0.1224 | 1.45  | 0      | 1.1   | 0.575  |
| 102410_at   | 1423450_a_at | Hs3st1       | heparan sulfate (glucosamine) 3-O-sulfotran    | -1.14 | 0.65 | 1.14  | 0.3028 | 1.16  | 0.3895 | 1.15  | 0.1695 | 3.57  | 0.336  |
| 102411_at   | 1416586_at   | Zfp239       | zinc finger protein 239                        | -1.19 | 0.7  | -1.65 | 0.2149 | -1.28 | 0.5437 | -1.71 | 0.1793 | 3.28  | 0.018  |
| 102412_at   | 1426751_s_at | Nup107       | nucleoporin 107                                | 1.02  | 0.9  | 1.09  | 0.5374 | 1.14  | 0.392  | 1.18  | 0.1855 | -1.83 | 0.1829 |
| 102413_at   | 1418478_at   | Lmo1         | LIM domain only 1                              | -1.29 | 0.1  | -1.04 | 0.6856 | 1.04  | 0.6041 | -1.1  | 0.2535 | 1.23  | 0.28   |
| 102416_at   | 1417017_at   | Cyp17a1      | cytochrome P450, family 17, subfamily a, pc    | 3.13  | 0.07 | -5.03 | 0.0001 | -2.39 | 0.0042 | -9.22 | 0      | 2.1   | 0.1265 |
| 102418_at   | 1417482_at   | Tex19        | testis expressed gene 19                       | -1    | 0.99 | -1.1  | 0.6912 | 1.11  | 0.6339 | 1.29  | 0.2153 | -1.01 | 0.9709 |
| 102419_at   | 1419415_a_at | Rarg         | retinoic acid receptor, gamma                  | 1.28  | 0.26 | -1.07 | 0.576  | 1.1   | 0.4548 | 1.11  | 0.3429 | 1.36  | 0.2181 |
| 102421_at   | 1424259_at   | 2400010G15RI | RIKEN cDNA 2400010G15 gene                     | -1.16 | 0.2  | -1.13 | 0.0257 | -1.06 | 0.2975 | -1.2  | 0.0034 | -1.6  | 0.0281 |
| 102423_at   | 1452011_a_at | Uxs1         | UDP-glucuronate decarboxylase 1                | -1.74 | 0.33 | -1.02 | 0.8806 | -1.24 | 0.2648 | -1.12 | 0.5016 | -1.03 | 0.9264 |
| 102424_at   | 1419561_at   | Ccl3         | chemokine (C-C motif) ligand 3                 | 2.22  | 0.05 | 1.78  | 0.042  | 1.21  | 0.514  | 2     | 0.0245 | 2.4   | 0.0213 |
| 102425_at   | 1422751_at   | Tle1         | transducin-like enhancer of split 1, homolog   | 1.6   | 0.3  | -1.19 | 0.339  | 1.37  | 0.212  | -1.32 | 0.138  | 1.26  | 0.1442 |
| 102426_at   | 1422598_at   | Casq1        | calsequestrin 1                                | -1.31 | 0.39 | -1.1  | 0.5175 | -1.06 | 0.613  | -1.2  | 0.1087 | 1.07  | 0.4746 |
| 102427_at   | 1451324_s_at | Fytd1        | forty-two-three domain containing 1            | 1.18  | 0.61 | 1.23  | 0.1889 | 1.3   | 0.0193 | 1.15  | 0.2592 | 1.24  | 0.4403 |
| 102429_at   | 1422898_s_at | Slc22a12     | solute carrier family 22 (organic anion/cation | -1.4  | 0.58 | -1.37 | 0.0347 | -1.24 | 0.1436 | -1.32 | 0.0403 | 1.42  | 0.3466 |
| 102430_at   | 1419272_at   | Myd88        | myeloid differentiation primary response ger   | 1.08  | 0.69 | 1.19  | 0.0846 | 1.07  | 0.5021 | 1.2   | 0.1307 | -1.05 | 0.8136 |
| 102552_at   | 1422339_at   | Gja3         | gap junction membrane channel protein alpt     | -2.74 | 0.3  | -1.16 | 0.2437 | -1.13 | 0.3351 | -1.09 | 0.3713 | 1.26  | 0.4952 |
| 102554_at   | 1422382_at   | Olfir16      | olfactory receptor 16                          | -1.16 | 0.65 | 1.01  | 0.9449 | 1.27  | 0.1501 | -1.07 | 0.724  | 1.34  | 0.2135 |
| 102555_at   | 1422417_at   | X99300       | epidymal sperm gene                            | -1.34 | 0.23 | 1.08  | 0.4095 | 1.13  | 0.4392 | -1.01 | 0.905  | 1.51  | 0.31   |
| 102556_at   | 1423022_at   | ---          | ---                                            | -1.6  | 0.25 | 1.36  | 0.0962 | 1.12  | 0.2252 | 1.2   | 0.088  | 1.82  | 0.1888 |
| 102560_at   | 1460321_at   | Cntn4        | contactin 4                                    | 1.04  | 0.88 | -1.08 | 0.5045 | 2.35  | 0.2536 | 1.15  | 0.2626 | 1.27  | 0.5375 |
| 102566_at   | 1422162_at   | Dcc          | deleted in colorectal carcinoma                | 1.83  | 0.43 | 2.17  | 0.0421 | 1.43  | 0.1707 | 2.4   | 0.0964 | -1.03 | 0.9032 |
| 102567_at   | 1422239_at   | Hoxd13       | homeo box D13                                  | 1.19  | 0.28 | -1.14 | 0.1219 | 1.06  | 0.5526 | -1.05 | 0.574  | 1.14  | 0.4364 |
| 102572_at   | 1421621_at   | Rasgrf2      | RAS protein-specific guanine nucleotide-rele   | -2.31 | 0.28 | -1.47 | 0.176  | 1.25  | 0.4032 | -1.02 | 0.9467 | 3.14  | 0.0379 |
| 102574_at   | 1421793_at   | Fgf11        | fibroblast growth factor 11                    | -1.21 | 0.65 | -1.29 | 0.012  | -1.19 | 0.134  | -1.24 | 0.0289 | -1.33 | 0.311  |
| 102575_at   | 1450611_at   | ---          | PREDICTED: Mus musculus similar to bM3c        | -1.49 | 0.19 | -1.18 | 0.2998 | -1.59 | 0.0002 | -1.54 | 0.0014 | -5.3  | 0.0358 |
| 102576_at   | 1419210_at   | Hrh1         | histamine receptor H 1                         | -1.91 | 0.12 | 1.22  | 0.3572 | 1.1   | 0.6912 | -1.12 | 0.6553 | 1.14  | 0.6503 |
| 102577_at   | 1421790_a_at | Kcnab3       | potassium voltage-gated channel, shaker-re     | -1.68 | 0.25 | 1.39  | 0.0583 | 1.28  | 0.2578 | 1.29  | 0.2749 | -1.09 | 0.8464 |
| 102578_at   | 1421765_at   | Pax5         | paired box gene 5                              | -1.31 | 0.52 | -1.16 | 0.2062 | 1.26  | 0.0696 | -1.05 | 0.7523 | -2.07 | 0.2205 |
| 102581_at   | 1422266_at   | Mycs         | myc-like oncogene, s-myc protein               | 1.01  | 0.99 | -1.28 | 0.1266 | -1.1  | 0.6198 | -1.51 | 0.0255 | 1.4   | 0.111  |
| 102582_at   | 1450497_at   | Apc2         | adenomatosis polyposis coli 2                  | -1.58 | 0.21 | -1.06 | 0.6694 | 1.09  | 0.5776 | 1.09  | 0.5593 | 1.4   | 0.2232 |
| 102584_at   | 1422254_a_at | Dyrk1b       | dual-specificity tyrosine-(Y)-phosphorylation  | -1.12 | 0.31 | -1.11 | 0.0771 | -1.35 | 0.0053 | -1.26 | 0.0068 | 1.39  | 0.0499 |
| 102586_at   | 1451014_at   | Ror1         | receptor tyrosine kinase-like orphan recepto   | 1.49  | 0.35 | -1.02 | 0.8007 | 1.1   | 0.2228 | -1.15 | 0.1711 | 1.36  | 0.3994 |
| 102599_at   | 1416642_a_at | Tpt1         | tumor protein, translationally-controlled 1    | -1.02 | 0.79 | -1.02 | 0.4364 | 1.03  | 0.1921 | 1.01  | 0.674  | 1.19  | 0.0959 |
| 102613_at   | 1426071_at   | Tiaf2        | TGF-beta1-induced anti-apoptotic factor 2      | 1.21  | 0.68 | -1.16 | 0.3505 | 1.08  | 0.6139 | 1.07  | 0.7173 | 2.52  | 0.3135 |
| 102614_at   | 1421336_at   | Prox1        | prospero-related homeobox 1                    | 1.47  | 0.48 | 1.21  | 0.3242 | -1.09 | 0.6652 | -1.27 | 0.1419 | -1.34 | 0.6353 |
| 102619_at   | 1450235_at   | Fgd3         | FYVE, RhoGEF and PH domain containing :        | 1.46  | 0.62 | 1.01  | 0.9067 | 1.08  | 0.6412 | 1.35  | 0.1977 | -1.33 | 0.1839 |
| 102620_at   | 1421961_a_at | Dnajb5       | DnaJ (Hsp40) homolog, subfamily B, memb        | -1.31 | 0.15 | -1.03 | 0.7951 | -1.08 | 0.4559 | 1.02  | 0.8317 | 1.02  | 0.9255 |
| 102621_at   | 1421452_at   | Cdon         | cell adhesion molecule-related/down-regulat    | -1.36 | 0.5  | -1.22 | 0.3375 | -1.14 | 0.4803 | -1.22 | 0.3086 | 1.3   | 0.0922 |
| 102623_at   | 1425840_a_at | Sema3f       | sema domain, immunoglobulin domain (Ig),       | -1.56 | 0.47 | 1.12  | 0.6178 | 1.57  | 0.0937 | 1.15  | 0.5867 | 1.1   | 0.7736 |
| 102624_at   | 1449484_at   | Stc2         | stanniocalcin 2                                | -1.18 | 0.38 | -1.15 | 0.1759 | -1.14 | 0.363  | -1.08 | 0.4259 | 1.27  | 0.1706 |
| 102626_r_at | 1419239_at   | Zfp54        | zinc finger protein 54                         | 1.01  | 0.98 | 1.12  | 0.3955 | 1.44  | 0.0887 | 1.3   | 0.0445 | -1.08 | 0.8294 |
| 102628_at   | 1425893_a_at | Fhit         | fragile histidine triad gene                   | 1.29  | 0.2  | -1.18 | 0.1728 | -1.26 | 0.142  | -1.12 | 0.2883 | -1.11 | 0.7587 |
| 102629_at   | 1419607_at   | Tnf          | tumor necrosis factor                          | -1.73 | 0.1  | -1.12 | 0.6736 | -1.13 | 0.7198 | 1.42  | 0.488  | 1.16  | 0.6141 |
| 102630_s_at | 1420353_at   | Lta          | lymphotoxin A                                  | -1.32 | 0.04 | 1.23  | 0.4304 | 1.14  | 0.2986 | -1.03 | 0.7642 | 1.3   | 0.3727 |
| 102631_at   | 1448953_at   | Blm          | Bloom syndrome homolog (human)                 | -1.52 | 0.32 | 1.03  | 0.905  | 1.26  | 0.3572 | -1.07 | 0.826  | 1.38  | 0.5171 |

|             |              |                  |                                                   |       |      |       |        |       |        |       |        |       |        |
|-------------|--------------|------------------|---------------------------------------------------|-------|------|-------|--------|-------|--------|-------|--------|-------|--------|
| 102632_at   | 1422814_at   | Calmbp1          | calmodulin binding protein 1                      | -1.42 | 0.59 | 1.09  | 0.463  | 1.07  | 0.6457 | 1.12  | 0.2385 | 1.14  | 0.6504 |
| 102633_at   | 1460280_at   | Grap2            | GRB2-related adaptor protein 2                    | -1.21 | 0.5  | -1.04 | 0.824  | 1.08  | 0.6643 | -1    | 0.9989 | 1.89  | 0.1006 |
| 102635_at   | 1419190_at   | Vti1a            | vesicle transport through interaction with t-S    | 2.56  | 0.01 | 4.05  | 0.0014 | 2.25  | 0.0821 | 2.39  | 0.0261 | 1.43  | 0.0916 |
| 102636_at   | 1418214_at   | Klc2             | kinesin light chain 2                             | 1.06  | 0.93 | -1.27 | 0.4499 | -1.14 | 0.6831 | 1.06  | 0.788  | 1.41  | 0.0451 |
| 102637_at   | 1425620_at   | Tgfr3            | transforming growth factor, beta receptor III     | -1.04 | 0.92 | -1.15 | 0.3379 | 1.14  | 0.374  | -1.04 | 0.8234 | 1.68  | 0.1726 |
| 102638_at   | 1419202_at   | Cstf             | cystatin F (leukocystatin)                        | 1.11  | 0.69 | -1.03 | 0.7277 | 1.05  | 0.7123 | -1.06 | 0.4768 | 1.59  | 0.0103 |
| 102639_at   | 1422758_at   | Chst2            | carbohydrate sulfotransferase 2                   | 2.83  | 0.01 | 1.27  | 0.5902 | 1.2   | 0.5823 | 1.3   | 0.4673 | 1.75  | 0.0624 |
| 102641_at   | 1418747_at   | Sfpi1            | SFFV proviral integration 1                       | -1.2  | 0.32 | 1.21  | 0.4151 | -1.13 | 0.1306 | 1.21  | 0.3953 | 1.24  | 0.0758 |
| 102642_at   | 1417584_at   | Slc11a2          | solute carrier family 11 (proton-coupled diva     | -1.19 | 0.34 | 1.16  | 0.1868 | 1.05  | 0.6049 | 1.18  | 0.1169 | 1.4   | 0.0807 |
| 102643_at   | 1419602_at   | Hoxa2            | homeo box A2                                      | -1.66 | 0.05 | -1.02 | 0.8764 | 1.12  | 0.2667 | 1.06  | 0.5621 | 1.15  | 0.4299 |
| 102644_at   | 1427040_at   | Mdfic            | MyoD family inhibitor domain containing           | -1.08 | 0.71 | -1.05 | 0.6075 | -1.22 | 0.0844 | -1.03 | 0.7892 | -1.15 | 0.3949 |
| 102645_at   | 1438045_at   | Eea1             | Early endosome antigen 1                          | 1.09  | 0.53 | 1.12  | 0.0329 | 1.07  | 0.3207 | 1.08  | 0.2894 | 1.19  | 0.1909 |
| 102647_g_at | 1434392_at   | Usp34            | ubiquitin specific protease 34                    | -1.04 | 0.79 | 1.07  | 0.2782 | -1.04 | 0.539  | 1.09  | 0.1705 | 1.02  | 0.7832 |
| 102649_s_at | 1420603_s_at | Raet1a /// Raet1 | retinoic acid early transcript 1, alpha /// retin | 1.47  | 0.03 | 1.4   | 0.2672 | -1.22 | 0.4767 | 1.65  | 0.0386 | -1.54 | 0.0276 |
| 102650_at   | 1425245_a_at | Rgs11            | regulator of G-protein signaling 11               | -1.35 | 0.06 | -1.26 | 0.0939 | -1.17 | 0.1906 | -1.24 | 0.1079 | 1.2   | 0.4215 |
| 102651_at   | 1425303_at   | Gck              | glucokinase                                       | -1.83 | 0.12 | -1.64 | 0.0015 | -1.38 | 0.0175 | -1.68 | 0.0001 | -1.62 | 0.0354 |
| 102653_at   | 1450123_at   | Ryr2             | ryanodine receptor 2, cardiac                     | -4.47 | 0.34 | -1.03 | 0.8462 | 2.64  | 0.0871 | 1.49  | 0.2221 | 1.96  | 0.1942 |
| 102654_at   | 1449232_at   | Gata1            | GATA binding protein 1                            | 1.21  | 0.74 | 1.08  | 0.8544 | -1.51 | 0.3159 | 1.38  | 0.3837 | -1.26 | 0.6173 |
| 102656_at   | 1427615_at   | Itga4            | integrin alpha 4                                  | -2.17 | 0.14 | 1.03  | 0.878  | 1.14  | 0.3319 | -1.02 | 0.9191 | -1.07 | 0.8664 |
| 102657_at   | 1418939_at   | Hlx1             | H2.0-like homeo box 1 (Drosophila)                | 2.26  | 0.03 | 1.82  | 0.0389 | 1.94  | 0.0037 | 1.39  | 0.3134 | 3.11  | 0.0058 |
| 102658_at   | 1419532_at   | Il1r2            | interleukin 1 receptor, type II                   | -1.7  | 0.03 | -1.04 | 0.7795 | 1.02  | 0.8864 | -1.28 | 0.1017 | -1.06 | 0.8522 |
| 102659_at   | 1417551_at   | Cln3             | ceroid lipofuscinosis, neuronal 3, juvenile (B    | -1.19 | 0.29 | -1.13 | 0.1299 | -1.08 | 0.2815 | -1.1  | 0.1883 | 1.21  | 0.0156 |
| 102660_at   | 1422870_at   | Hoxc4            | homeo box C4                                      | 1.77  | 0.1  | -1.13 | 0.4765 | 1.03  | 0.8194 | -1.04 | 0.7266 | 1.32  | 0.1673 |
| 102661_at   | 1427683_at   | Egr2             | early growth response 2                           | 1.48  | 0.29 | 1.08  | 0.5078 | 1.11  | 0.5084 | 1.02  | 0.8941 | 2.24  | 0.06   |
| 102662_at   | 1419747_at   | Asgr2            | asialoglycoprotein receptor 2                     | 1.41  | 0.19 | 1.2   | 0.0048 | 1.02  | 0.8595 | 1.22  | 0.0347 | 1.66  | 0.0078 |
| 102663_at   | 1452521_a_at | Plaur            | urokinase plasminogen activator receptor          | -1.21 | 0.44 | 1.71  | 0.2039 | 1.12  | 0.195  | 1.95  | 0.2282 | 1.63  | 0.3998 |
| 102664_at   | 1421123_at   | Cdk5r1           | cyclin-dependent kinase 5, regulatory subun       | 1.77  | 0.23 | -1.23 | 0.1851 | -1.02 | 0.8854 | 1.01  | 0.9601 | 1.32  | 0.622  |
| 102665_at   | 1418756_at   | Trh              | thyrotropin releasing hormone                     | 1.89  | 0.02 | -1.2  | 0.1919 | 1.05  | 0.6367 | -1.17 | 0.1389 | 1.79  | 0.0889 |
| 102666_at   | 1448821_at   | Tyr              | tyrosinase                                        | -3.15 | 0.01 | 1.08  | 0.7291 | 1.27  | 0.3619 | -1.34 | 0.2433 | 1.59  | 0.378  |
| 102667_at   | 1422093_at   | Wnt3a            | wingless-related MMTV integration site 3A         | 1.13  | 0.23 | -1.39 | 0.1377 | 1.04  | 0.8187 | -1.09 | 0.7088 | 1.17  | 0.3422 |
| 102668_at   | 1449051_at   | Ppara            | peroxisome proliferator activated receptor al     | 1.03  | 0.93 | 1.06  | 0.8295 | -2.14 | 0.0153 | -1.47 | 0.1983 | -1.33 | 0.0063 |
| 102669_at   | 1422161_at   | Sn               | sialoadhesin                                      | 1.59  | 0.44 | 1.13  | 0.7272 | -1.48 | 0.1466 | -1.08 | 0.8341 | 1.18  | 0.6753 |
| 102670_at   | 1449095_at   | Vps54            | vacuolar protein sorting 54 (yeast)               | -1.21 | 0.49 | -1.13 | 0.0832 | 1.1   | 0.4705 | -1.2  | 0.0436 | -1.16 | 0.2396 |
| 102672_g_at | 1452529_a_at | Creb1            | cAMP responsive element binding protein 1         | 1.84  | 0.13 | 1     | 0.9932 | 1.2   | 0.4644 | -1.02 | 0.9408 | 1.25  | 0.2825 |
| 102675_at   | 1419007_at   | Zp3              | zona pellucida glycoprotein 3                     | -1.08 | 0.82 | -1.23 | 0.3564 | 1.02  | 0.9146 | 1.04  | 0.8372 | 1.65  | 0.209  |
| 102676_at   | 1421071_at   | Vh1h             | von Hippel-Lindau syndrome homolog                | 1.8   | 0.17 | 1.15  | 0.6741 | -1.18 | 0.6676 | -1.25 | 0.5415 | 1.5   | 0.551  |
| 102677_at   | 1448660_at   | Arhgdig          | Rho GDP dissociation inhibitor (GDI) gamma;       | -1.16 | 0.66 | -1.12 | 0.6828 | -1.24 | 0.4391 | -1.18 | 0.5467 | -1    | 0.9867 |
| 102678_at   | 1418077_at   | Trim21           | tripartite motif protein 21                       | -1.14 | 0.39 | 1.03  | 0.788  | -1.03 | 0.7999 | 1.01  | 0.8953 | 1.05  | 0.7866 |
| 102680_g_at | 1425253_a_at | Madcam1          | mucosal vascular addressin cell adhesion m        | 1     | 0.99 | 1.08  | 0.7411 | -1.31 | 0.1921 | -1.31 | 0.2509 | -1.04 | 0.8717 |
| 102681_at   | 1420351_at   | Tnfrsf4          | tumor necrosis factor receptor superfamily, r     | -1.28 | 0.17 | 1.12  | 0.2524 | 1.34  | 0.0312 | 1.09  | 0.3087 | 1.44  | 0.1506 |
| 102682_at   | 1419341_at   | Epha8            | Eph receptor A8                                   | 1.31  | 0.35 | -1.22 | 0.0213 | -1.02 | 0.7944 | -1.06 | 0.688  | -1.03 | 0.8805 |
| 102683_at   | 1460654_at   | ---              | ---                                               | -1.78 | 0.1  | -1.13 | 0.1063 | -1.07 | 0.433  | -1.07 | 0.2709 | 1.01  | 0.9353 |
| 102684_at   | 1421782_a_at | Smr2             | submaxillary gland androgen regulated prote       | -2.34 | 0.04 | -1.07 | 0.608  | -1.29 | 0.1314 | 1.01  | 0.9287 | 1.67  | 0.257  |
| 102685_at   | 1451953_at   | Smr2             | submaxillary gland androgen regulated prote       | -2.46 | 0.11 | 1.05  | 0.7727 | 1.01  | 0.9582 | 1.03  | 0.915  | 1.65  | 0.5364 |
| 102686_at   | 1424059_at   | Suv420h2         | suppressor of variegation 4-20 homolog 2 (L       | -1.11 | 0.75 | -1.12 | 0.0823 | -1.13 | 0.2682 | -1.28 | 0.0162 | 1.3   | 0.476  |
| 102687_at   | 1436561_at   | Suv39h2          | suppressor of variegation 3-9 homolog 2 (Dr       | -3.57 | 0.05 | -1.07 | 0.8349 | 1.08  | 0.8061 | -1.38 | 0.3293 | 2.12  | 0.2539 |
| 102688_f_at | 1420344_x_at | Gzmd             | granzyme D                                        | 1.01  | 0.97 | 1.05  | 0.9026 | 1.1   | 0.7911 | -1.08 | 0.833  | 1.23  | 0.6299 |
| 102689_at   | 1450378_at   | Tapbp            | TAP binding protein                               | -1.12 | 0.78 | 1.03  | 0.8031 | -1.46 | 0.0069 | -1.03 | 0.8203 | -1.02 | 0.906  |
| 102690_at   | 1419731_at   | Cyp2b19          | cytochrome P450, family 2, subfamily b, pol       | -1.34 | 0.27 | 1.09  | 0.2794 | 1.13  | 0.2206 | 1.06  | 0.4744 | 1.53  | 0.2623 |
| 102691_at   | 1418865_at   | Zfp385           | zinc finger protein 385                           | 1.12  | 0.6  | 1.06  | 0.5493 | -1.09 | 0.3152 | -1.07 | 0.2732 | -1.09 | 0.5512 |
| 102692_s_at | 1452547_s_at | H2-D1 /// H2-T1  | histocompatibility 2, D region locus 1 /// histc  | -1.28 | 0.71 | 1.13  | 0.6241 | 1.18  | 0.6282 | 1.23  | 0.4102 | 2.21  | 0.0042 |
| 102693_f_at | 1419090_x_at | Klk26            | kallikrein 26                                     | -2.26 | 0.13 | -1.01 | 0.9497 | 1.05  | 0.7329 | 1     | 0.9655 | 1.64  | 0.0766 |
| 102694_at   | 1449238_at   | Psg16            | pregnancy specific glycoprotein 16                | -1.44 | 0.05 | -1.1  | 0.7123 | 1.55  | 0.3765 | -1.09 | 0.6848 | 1.15  | 0.6851 |

|             |              |                   |                                                 |       |      |       |        |       |        |       |        |       |        |
|-------------|--------------|-------------------|-------------------------------------------------|-------|------|-------|--------|-------|--------|-------|--------|-------|--------|
| 102695_at   | 1427608_a_at | Tcrg-C            | T-cell receptor gamma, constant region          | -1.11 | 0.29 | -1.03 | 0.6478 | -1.17 | 0.0384 | -1.1  | 0.3201 | 1.7   | 0.0257 |
| 102697_at   | 1421013_at   | Pitpnb            | phosphatidylinositol transfer protein, beta     | -1.1  | 0.85 | 1     | 0.9675 | -1.08 | 0.4396 | -1.01 | 0.9548 | -1.11 | 0.4839 |
| 102698_at   | 1449888_at   | Epas1             | endothelial PAS domain protein 1                | -1.23 | 0.43 | -1.06 | 0.6449 | -1.03 | 0.859  | -1.08 | 0.6042 | 1.4   | 0.1926 |
| 102699_at   | 1419676_at   | Mx2               | myxovirus (influenza virus) resistance 2        | -1.13 | 0.71 | -1.01 | 0.9171 | -1.09 | 0.3489 | 1.06  | 0.6648 | 1.02  | 0.9102 |
| 102701_at   | 1425645_s_at | Cyp2b10           | cytochrome P450, family 2, subfamily b, poly    | 3.8   | 0.08 | 1.01  | 0.8928 | 1.03  | 0.9171 | 1     | 0.9912 | 2.71  | 0.007  |
| 102702_at   | 1435358_at   | Cuedc1            | CUE domain containing 1                         | -1.36 | 0.38 | -1.36 | 0.0911 | 1.03  | 0.8807 | -1.37 | 0.132  | 1.54  | 0.0099 |
| 102703_s_at | 1425382_a_at | Aqp4              | aquaporin 4                                     | 1.33  | 0.61 | 2.19  | 0.0081 | -1.19 | 0.5635 | 1.41  | 0.2738 | -1.37 | 0.2138 |
| 102707_f_at | 1421564_at   | Serpina3c         | serine (or cysteine) proteinase inhibitor, clac | -1.56 | 0.11 | -1.69 | 0.0001 | 1.06  | 0.3924 | -1.76 | 0      | -1.93 | 0.0053 |
| 102708_at   | 1419175_a_at | Btn1a1            | butyrophilin, subfamily 1, member A1            | 1.08  | 0.7  | 1.22  | 0.094  | 1.29  | 0.0709 | 1.12  | 0.2616 | 1.63  | 0.2827 |
| 102709_at   | 1436241_s_at | Hira              | histone cell cycle regulation defective homol   | -1.43 | 0.35 | 1.47  | 0.1156 | 1.83  | 0.0875 | 1.54  | 0.168  | 1.38  | 0.627  |
| 102711_at   | 1419221_a_at | Rgs14             | regulator of G-protein signaling 14             | -1.2  | 0.33 | 1.01  | 0.8532 | -1.01 | 0.8794 | 1.01  | 0.8876 | 1.21  | 0.0486 |
| 102712_at   | 1450826_a_at | Saa3              | serum amyloid A 3                               | 2.49  | 0.09 | 14.01 | 0.1063 | 1.43  | 0.43   | 14.82 | 0.0447 | -2.7  | 0.4419 |
| 102713_at   | 1418864_at   | Gata4             | GATA binding protein 4                          | -1.36 | 0.02 | -1.14 | 0.2818 | -1.02 | 0.8457 | -1.08 | 0.4517 | 1.08  | 0.8167 |
| 102714_at   | 1419625_at   | Hspa1l            | heat shock protein 1-like                       | -1.89 | 0.13 | 1.06  | 0.7502 | 1.13  | 0.5639 | -1.17 | 0.4222 | 1.86  | 0.0459 |
| 102715_at   | 1418157_at   | Nr2f1             | nuclear receptor subfamily 2, group F, mem1     | 5.67  | 0    | 1.07  | 0.8061 | 1.25  | 0.4647 | -1.14 | 0.6874 | 2.76  | 0.147  |
| 102716_at   | 1425989_a_at | Eya3              | eyes absent 3 homolog (Drosophila)              | 1.18  | 0.63 | -1.03 | 0.8794 | 1.25  | 0.3932 | -1.16 | 0.4678 | 1.04  | 0.7653 |
| 102718_at   | 1424727_at   | Ccr5              | chemokine (C-C motif) receptor 5                | 2.37  | 0.05 | 1.62  | 0.1861 | 1     | 0.999  | 1.87  | 0.3208 | -2.2  | 0.1365 |
| 102719_f_at | 1422260_x_at | Ccr5              | chemokine (C-C motif) receptor 5                | 1.23  | 0.67 | 1.52  | 0.4921 | -3.47 | 0.0029 | 1.56  | 0.5995 | 1.68  | 0.4678 |
| 102720_at   | 1418788_at   | Tek               | endothelial-specific receptor tyrosine kinase   | 1.4   | 0.19 | -1.25 | 0.0696 | 1.19  | 0.2069 | -1.16 | 0.4021 | 1.18  | 0.2595 |
| 102722_g_at | 1427503_at   | Al324046          | expressed sequence Al324046                     | -3.32 | 0.13 | -3.39 | 0.2052 | -1.3  | 0.6834 | -3.05 | 0.2259 | 1.48  | 0.0386 |
| 102723_at   | 1447998_at   | Igh-4             | Expressed sequence Al324046                     | -1.41 | 0.01 | -1.17 | 0.317  | 1.15  | 0.4292 | -1.29 | 0.1492 | 2.55  | 0.2333 |
| 102724_at   | 1427448_at   | Rabep1            | rabaptin, RAB GTPase binding effector prot      | -1.19 | 0.58 | -1.06 | 0.5665 | 1.01  | 0.9184 | -1.1  | 0.3918 | -1.27 | 0.473  |
| 102725_at   | 1448468_a_at | Kcnab1            | potassium voltage-gated channel, shaker-re      | 1.24  | 0.72 | 1.77  | 0.0418 | -1.12 | 0.3571 | 1.78  | 0.1145 | 1.34  | 0.1942 |
| 102726_at   | 1416783_at   | ---               | ---                                             | -1.55 | 0.1  | 1.01  | 0.9853 | 1.23  | 0.5225 | 1.23  | 0.552  | 1.98  | 0.0888 |
| 102728_f_at | 1450171_x_at | Gzme              | granzyme E                                      | 1.05  | 0.86 | -1.05 | 0.7387 | 1.35  | 0.3496 | 1.44  | 0.2355 | 1.4   | 0.1004 |
| 102729_f_at | 1460232_s_at | Hsd3b2 /// Hsd3b2 | hydroxysteroid dehydrogenase-2, delta<5>-;      | -1.26 | 0.1  | 1.65  | 0.0204 | 1.42  | 0.0924 | 2.15  | 0.0003 | -1.54 | 0.0091 |
| 102731_g_at | 1421358_at   | H2-M3             | histocompatibility 2, M region locus 3          | -1.42 | 0.34 | 1.11  | 0.5718 | -1.03 | 0.864  | 1.36  | 0.1725 | -1.31 | 0.4128 |
| 102732_at   | 1436042_at   | Tln1              | Talin 1                                         | -1.17 | 0.43 | 1.05  | 0.7079 | -1.05 | 0.7932 | 1.02  | 0.813  | 1     | 0.9864 |
| 102733_at   | 1421256_at   | Gzmc              | granzyme C                                      | -1.04 | 0.95 | -1.39 | 0.3671 | -1.68 | 0.1781 | -1.36 | 0.4093 | 1.4   | 0.4251 |
| 102734_at   | 1418854_at   | Birc2             | baculoviral IAP repeat-containing 2             | 1.45  | 0.18 | 1.25  | 0.0164 | 1.16  | 0.2309 | 1.45  | 0.0013 | 1.17  | 0.2829 |
| 102735_at   | 1421356_at   | Tex9              | testis expressed gene 9                         | -1.24 | 0.21 | -1.22 | 0.2706 | 1.17  | 0.4393 | -1.19 | 0.2843 | 1.89  | 0.0226 |
| 102737_at   | 1451924_a_at | Edn1              | endothelin 1                                    | 1.32  | 0.39 | 1.08  | 0.5314 | -1    | 0.9884 | 1.15  | 0.2882 | 1.22  | 0.1327 |
| 102739_s_at | 1420492_s_at | Smr1 /// Smr3     | submaxillary gland androgen regulated prot      | 1.09  | 0.71 | 1.14  | 0.6742 | -1.01 | 0.9722 | -1.15 | 0.3002 | 1.26  | 0.5041 |
| 102740_at   | 1418160_at   | Mkrn3             | makorin, ring finger protein, 3                 | -1.32 | 0.75 | 1.01  | 0.9741 | -1.32 | 0.2804 | 1.01  | 0.96   | 1.95  | 0.0566 |
| 102742_g_at | 1424719_a_at | Mapt              | microtubule-associated protein tau              | 1.23  | 0.29 | -1.07 | 0.6851 | -1.03 | 0.7963 | -1.23 | 0.2066 | 1.43  | 0.2714 |
| 102743_at   | 1424718_at   | Mapt              | microtubule-associated protein tau              | -1.45 | 0.17 | -1.15 | 0.4782 | -1.14 | 0.4595 | 1.01  | 0.9421 | -1.12 | 0.7853 |
| 102745_at   | 1450521_a_at | Tcrg              | T-cell receptor gamma chain                     | 2.67  | 0.03 | 1.39  | 0.2121 | 1.15  | 0.6021 | 1.61  | 0.0164 | 1.31  | 0.7    |
| 102746_at   | 1456100_at   | LOC280621         | similar to selenoprotein W                      | 1.16  | 0.54 | -1.01 | 0.9213 | 1.01  | 0.9364 | 1.01  | 0.9477 | 1.15  | 0.4484 |
| 102748_at   | 1418907_at   | F5                | Coagulation factor V                            | -1.33 | 0.29 | 1.16  | 0.0188 | 1.23  | 0      | 1.28  | 0.0002 | 1.31  | 0.0334 |
| 102749_at   | 1418709_at   | Cox7a1            | cytochrome c oxidase, subunit VIIa 1            | 2.92  | 0.02 | 1.19  | 0.4773 | 1.29  | 0.3429 | 1.62  | 0.0498 | 2.55  | 0.0067 |
| 102750_at   | 1416182_at   | Apba3             | amyloid beta (A4) precursor protein-binding,    | 1.08  | 0.71 | -1.35 | 0.0002 | -1.16 | 0.0986 | -1.46 | 0      | -1.49 | 0.197  |
| 102751_at   | 1417455_at   | Tgfb3             | transforming growth factor, beta 3              | -1.8  | 0    | -1.15 | 0.139  | 1.01  | 0.9289 | -1.08 | 0.4014 | 1.67  | 0.1101 |
| 102752_at   | 1416329_at   | Cyfp1             | cytoplasmic FMR1 interacting protein 1          | -1.05 | 0.67 | 1.23  | 0.0202 | 1.07  | 0.4324 | 1.17  | 0.0293 | 1     | 0.9612 |
| 102753_at   | 1416347_at   | Men1              | multiple endocrine neoplasia 1                  | 1.22  | 0.68 | 1.35  | 0.1544 | 1.12  | 0.6315 | -1.36 | 0.2456 | -1.07 | 0.7773 |
| 102754_at   | 1419563_at   | Birc6             | baculoviral IAP repeat-containing 6             | 1.15  | 0.51 | 1.18  | 0.1841 | -1.07 | 0.6478 | 1.1   | 0.3977 | 1.21  | 0.1585 |
| 102755_at   | 1418165_at   | Itlna             | intelectin a                                    | 1.07  | 0.82 | -1.08 | 0.5756 | -1.03 | 0.8151 | -1.13 | 0.5215 | 1.18  | 0.5442 |
| 102758_at   | 1452466_a_at | Rbm6              | RNA binding motif protein 6                     | 1.07  | 0.89 | -1.11 | 0.5716 | -1.18 | 0.3736 | -1.09 | 0.6102 | -1.23 | 0.4593 |
| 102759_at   | 1418463_at   | Pik3r2            | phosphatidylinositol 3-kinase, regulatory sub   | -1.12 | 0.78 | -1.16 | 0.6223 | 1.16  | 0.5338 | 1.39  | 0.2617 | -1.14 | 0.5217 |
| 102761_at   | 1452262_at   | Grpel2            | GrpE-like 2, mitochondrial                      | 2.04  | 0.02 | 1.17  | 0.3356 | 1.35  | 0.0017 | 1.13  | 0.2703 | 1.83  | 0.0311 |
| 102762_r_at | 1419014_at   | Rhag              | Rhesus blood group-associated A glycoprot       | -1.43 | 0.09 | -1.4  | 0.0013 | -1.07 | 0.3683 | -1.19 | 0.0374 | 1.26  | 0.1515 |
| 102763_at   | 1418595_at   | MGI:1929709       | plasma membrane associated protein, S3-1:       | 1.58  | 0.39 | 1.97  | 0.2036 | 3.44  | 0.2391 | 2.42  | 0.044  | 3.63  | 0.003  |
| 102764_at   | 1460226_at   | Trap1a            | tumor rejection antigen P1A                     | 1.01  | 0.99 | -1.26 | 0.226  | -1.26 | 0.2007 | -1.26 | 0.2349 | 1.38  | 0.2112 |
| 102765_at   | 1418720_at   | Cops7b            | COP9 (constitutive photomorphogenic) hom        | -1.18 | 0.21 | 1.19  | 0.0152 | 1.16  | 0.0397 | 1.15  | 0.0108 | 1.23  | 0.0034 |

|             |              |               |                                                 |       |      |       |        |       |        |       |        |       |        |
|-------------|--------------|---------------|-------------------------------------------------|-------|------|-------|--------|-------|--------|-------|--------|-------|--------|
| 102766_at   | 1427940_s_at | Mycbp         | c-myc binding protein                           | 1.89  | 0.18 | 1.62  | 0.018  | 1.13  | 0.4612 | 1.36  | 0.0379 | 1.21  | 0.6427 |
| 102767_at   | 1455089_at   | Gng12         | RIKEN cDNA 4930597O21 gene                      | -1    | 1    | 1.03  | 0.4327 | 1.09  | 0.1074 | 1.16  | 0.0045 | -1.08 | 0.3259 |
| 102771_at   | 1451833_a_at | Setdb1        | SET domain, bifurcated 1                        | 1.23  | 0.11 | 1.09  | 0.3359 | 1.14  | 0.199  | 1.23  | 0.0322 | 1.03  | 0.8364 |
| 102772_at   | 1423999_at   | Ab11          | v-abl Abelson murine leukemia oncogene 1        | 1.03  | 0.86 | 1.09  | 0.0722 | 1.09  | 0.1117 | 1.13  | 0.0329 | -1.02 | 0.9149 |
| 102773_at   | 1427482_a_at | Car8          | carbonic anhydrase 8                            | 1.71  | 0.05 | 1.26  | 0.1121 | 1.42  | 0.0409 | 1.26  | 0.1689 | 1.51  | 0.0269 |
| 102774_at   | 1418093_a_at | Egf           | epidermal growth factor                         | 1.17  | 0.21 | -1.14 | 0.4579 | 1.01  | 0.9645 | -1.22 | 0.1089 | 1.05  | 0.7025 |
| 102776_at   | 1428592_s_at | Usp38         | ubiquitin specific protease 38                  | -1.03 | 0.66 | -1.06 | 0.4037 | -1.03 | 0.7145 | -1.05 | 0.5579 | -1.57 | 0.0117 |
| 102777_at   | 1422226_at   | ---           | ---                                             | -1.01 | 0.98 | 1.5   | 0.0584 | 1.25  | 0.086  | 1.19  | 0.2648 | -1.17 | 0.6633 |
| 102778_at   | 1418830_at   | Cd79a         | CD79A antigen (immunoglobulin-associated        | -1.07 | 0.75 | 1.04  | 0.7614 | 1.03  | 0.8288 | -1.05 | 0.6512 | 1.27  | 0.4379 |
| 102780_at   | 1426875_s_at | Npn3          | neoplastic progression 3                        | 2.15  | 0.08 | 1.85  | 0.0187 | 1.18  | 0.1279 | 2.29  | 0.007  | 1.19  | 0.4259 |
| 102781_at   | 1454149_a_at | Ccnl2         | cyclin L2                                       | -1.03 | 0.89 | 1.03  | 0.652  | 1.29  | 0.0236 | 1.17  | 0.0487 | 1.07  | 0.4656 |
| 102782_at   | 1449346_s_at | Riok1         | RIO kinase 1 (yeast)                            | 4.16  | 0.02 | 1.26  | 0.5142 | 1.5   | 0.2969 | 1.81  | 0.0938 | 1.23  | 0.4133 |
| 102783_at   | 1452799_at   | 2310009E04Rik | RIKEN cDNA 2310009E04 gene                      | 1.18  | 0.06 | -1.44 | 0.0003 | -1.09 | 0.1897 | -1.44 | 0.0018 | -1.52 | 0.0023 |
| 102784_at   | 1426974_at   | 4632413K17Rik | RIKEN cDNA 4632413K17 gene                      | 1.25  | 0.62 | -1.12 | 0.1526 | -1.29 | 0.0281 | -1.29 | 0.0084 | 1.01  | 0.9741 |
| 102785_at   | 1418477_at   | Matn1         | matrilin 1, cartilage matrix protein 1          | -2.15 | 0.04 | 1.08  | 0.6837 | 1     | 0.99   | 1.01  | 0.9557 | 1.57  | 0.3188 |
| 102786_at   | 1433486_at   | Clcn3         | chloride channel 3                              | -1.07 | 0.73 | 1.02  | 0.8578 | -1.06 | 0.4859 | -1.02 | 0.8091 | -1.5  | 0.013  |
| 102787_at   | 1433485_x_at | Gpr56         | G protein-coupled receptor 56                   | 1.05  | 0.91 | -1.24 | 0.1401 | -1.23 | 0.198  | 1.39  | 0.2627 | -1.11 | 0.7334 |
| 102788_s_at | 1424797_a_at | Pitx2         | paired-like homeodomain transcription facto     | -1.45 | 0.14 | 1.07  | 0.5964 | -1.21 | 0.1028 | -1.01 | 0.9686 | 1.48  | 0.1738 |
| 102789_at   | 1450333_a_at | Gata2         | GATA binding protein 2                          | 2.46  | 0.03 | -1.25 | 0.0177 | -1.05 | 0.5454 | -1.31 | 0.0084 | 1.18  | 0.074  |
| 102790_at   | 1424283_at   | Jtb           | jumping translocation breakpoint                | 1.1   | 0.41 | -1.08 | 0.3051 | 1.02  | 0.788  | -1.13 | 0.1431 | -1.59 | 0.0108 |
| 102791_at   | 1422962_a_at | Psmb8         | proteasome (prosome, macropain) subunit, l      | 1.2   | 0.09 | 1.71  | 0.323  | -1.42 | 0.0117 | 2     | 0.1801 | -1.59 | 0.198  |
| 102792_at   | 1425753_a_at | Ung           | uracil-DNA glycosylase                          | -1.1  | 0.73 | -1.22 | 0.0888 | 1.11  | 0.4376 | -1.08 | 0.4807 | 1.08  | 0.6243 |
| 102793_at   | 1427211_at   | Krtap8-1      | keratin associated protein 8-1                  | -2.79 | 0.21 | -1.45 | 0.0881 | -1.22 | 0.4317 | -1.09 | 0.5921 | 2.39  | 0.2585 |
| 102794_at   | 1448710_at   | Cxcr4         | chemokine (C-X-C motif) receptor 4              | -1.17 | 0.81 | 1.5   | 0.2279 | 1.14  | 0.7287 | 2.13  | 0.0606 | 1.57  | 0.42   |
| 102795_at   | 1426557_at   | Mesp1         | mesoderm posterior 1                            | -1.88 | 0.32 | -1.2  | 0.1707 | 1.17  | 0.3423 | -1.15 | 0.2745 | -1.05 | 0.9021 |
| 102796_at   | 1423522_at   | Npm3          | nucleoplasm 3                                   | 1.52  | 0.63 | -1.23 | 0.4526 | -2.14 | 0.0072 | -2.29 | 0.0082 | 1.64  | 0.0169 |
| 102797_at   | 1448390_a_at | Dhrs3         | dehydrogenase/reductase (SDR family) mer        | 1.12  | 0.48 | 1.11  | 0.0847 | -1.02 | 0.7257 | -1.1  | 0.1192 | -1.06 | 0.7719 |
| 102798_at   | 1416077_at   | Adm           | adrenomedullin                                  | -1.31 | 0.31 | -1.11 | 0.7273 | -1.26 | 0.3542 | 1.21  | 0.5425 | 1.13  | 0.5725 |
| 102799_at   | 1418037_at   | C4bp          | complement component 4 binding protein          | -1.02 | 0.92 | 1     | 0.9656 | -1.14 | 0.1623 | -1.09 | 0.4293 | -1.91 | 0.0007 |
| 102800_at   | 1416693_at   | Foxc2         | forkhead box C2                                 | -1.68 | 0.15 | 1.49  | 0.1246 | 1.92  | 0.0681 | 1.2   | 0.5031 | -1.05 | 0.8875 |
| 102802_at   | 1417932_at   | Il18          | interleukin 18                                  | 1.68  | 0.12 | 1.09  | 0.6147 | -1.15 | 0.3676 | 1.03  | 0.8152 | 1.08  | 0.6146 |
| 102804_at   | 1460681_at   | Ceacam2       | CEA-related cell adhesion molecule 2            | -2.4  | 0    | -1.09 | 0.1711 | 1.04  | 0.6504 | -1.12 | 0.0763 | -1.23 | 0.0338 |
| 102806_g_at | 1425675_s_at | Ceacam1       | CEA-related cell adhesion molecule 1            | 1.27  | 0.45 | -1.05 | 0.5938 | 1.03  | 0.8622 | -1.19 | 0.1509 | -1.97 | 0.0149 |
| 102807_at   | 1434138_at   | Prune         | prune homolog (Drosophila)                      | 1.01  | 0.93 | 1.03  | 0.579  | -1.04 | 0.4391 | -1.07 | 0.2233 | 1.12  | 0.2203 |
| 102808_at   | 1418738_at   | Scn1b         | sodium channel, voltage-gated, type I, beta     | 2.82  | 0.05 | 1.77  | 0.0012 | 1.55  | 0.0441 | 1.82  | 0.0016 | 1.91  | 0.123  |
| 102809_s_at | 1425396_a_at | Lck           | lymphocyte protein tyrosine kinase              | 1.01  | 0.97 | 1.41  | 0.0585 | 1.12  | 0.41   | 1.28  | 0.2061 | 2.08  | 0.0129 |
| 102811_at   | 1417730_at   | Ext1          | exostoses (multiple) 1                          | -1.13 | 0.63 | -1.09 | 0.2746 | -1.14 | 0.026  | -1.19 | 0.0203 | -1.07 | 0.5602 |
| 102813_f_at | 1451973_at   | Ube1dc1       | ubiquitin-activating enzyme E1-domain cont:     | 1.23  | 0.11 | -1.05 | 0.4295 | 1.05  | 0.667  | -1.08 | 0.1677 | 1.02  | 0.884  |
| 102815_at   | 1418468_at   | ---           | ---                                             | 1.03  | 0.87 | -1    | 0.991  | 1.09  | 0.3883 | 1.15  | 0.0939 | -1.63 | 0.0106 |
| 102816_at   | 1421921_at   | Serpina3m     | serine (or cysteine) proteinase inhibitor, clac | 1.57  | 0.13 | -1.11 | 0.0974 | 1.06  | 0.3819 | -1.1  | 0.0589 | 1.06  | 0.5233 |
| 102817_at   | 1449354_at   | U2af1-rs1     | U2 small nuclear ribonucleoprotein auxiliary    | 1.77  | 0.16 | 1.03  | 0.7313 | 1.11  | 0.3726 | 1.1   | 0.3036 | 1.06  | 0.7685 |
| 102818_at   | 1422618_x_at | Xmr           | Xlr-related, meiosis regulated                  | 2     | 0.22 | 1.29  | 0.3589 | 1.86  | 0.0085 | 1.23  | 0.4267 | 2.45  | 0.0799 |
| 102819_at   | 1418046_at   | Nap1l2        | nucleosome assembly protein 1-like 2            | -2.14 | 0.15 | -1.28 | 0.2935 | 1     | 0.9903 | -1.18 | 0.4915 | -1.75 | 0.0493 |
| 102820_at   | 1449479_at   | Cyp2b13       | cytochrome P450, family 2, subfamily b, pol     | 42.04 | 0.15 | 2.87  | 0.0003 | 1.04  | 0.8646 | 2     | 0.0308 | 23.52 | 0      |
| 102822_at   | 1418679_at   | Gzmf          | granzyme F                                      | -2.22 | 0.09 | -1.53 | 0.2297 | -1.11 | 0.7485 | -1.12 | 0.8032 | -1.58 | 0.2779 |
| 102824_g_at | 1424631_a_at | Ighg          | Immunoglobulin heavy chain (gamma polyp         | 1.25  | 0.42 | 1.54  | 0.1518 | -1.08 | 0.8185 | 1.74  | 0.0425 | 1.56  | 0.1355 |
| 102826_at   | 1423556_at   | Akr1b7        | aldo-keto reductase family 1, member B7         | 1.92  | 0.11 | -1.06 | 0.5768 | 1.89  | 0.0582 | 1.1   | 0.2955 | 2.36  | 0.0048 |
| 102827_at   | 1416816_at   | Nek7          | NIMA (never in mitosis gene a)-related expr     | -1.21 | 0.04 | 1.22  | 0.0065 | 1.25  | 0.0152 | 1.15  | 0.0088 | 1.16  | 0.1196 |
| 102828_at   | 1426850_a_at | Map2k6        | mitogen activated protein kinase kinase 6       | 3.95  | 0.01 | 1.22  | 0.1768 | 1.51  | 0.0123 | 1.67  | 0.0047 | 1.27  | 0.4442 |
| 102831_s_at | 1449858_at   | ---           | ---                                             | -1.76 | 0.26 | 1.08  | 0.7666 | -1.39 | 0.2351 | -1.53 | 0.1723 | 1.65  | 0.1704 |
| 102832_at   | 1427790_at   | Adam1a        | a disintegrin and metalloproteinase domain      | -1.67 | 0.14 | -1.22 | 0.3489 | -1.18 | 0.3724 | -1.11 | 0.5858 | -1.05 | 0.8825 |
| 102833_at   | 1434116_at   | Cbx2          | chromobox homolog 2 (Drosophila Pc class)       | 1.42  | 0.54 | 2.52  | 0.0012 | 1.75  | 0.0546 | 2.25  | 0.0009 | 1.88  | 0.006  |
| 102836_at   | 1416195_at   | MGI:1194899   | putative phosphatase                            | 1.12  | 0.53 | 1.02  | 0.7565 | 1.01  | 0.921  | 1.03  | 0.5925 | 1.49  | 0.0255 |

|             |              |                 |                                                 |       |      |       |        |       |        |       |        |       |        |
|-------------|--------------|-----------------|-------------------------------------------------|-------|------|-------|--------|-------|--------|-------|--------|-------|--------|
| 102838_at   | 1419480_at   | Sell            | selectin, lymphocyte                            | 1.1   | 0.64 | 1.17  | 0.104  | 1.34  | 0.0344 | 1.72  | 0.1655 | 1.17  | 0.7585 |
| 102839_at   | 1453181_x_at | Plscr1          | phospholipid scramblase 1                       | -1.32 | 0.15 | 1.16  | 0.5746 | 1.07  | 0.5401 | 1.39  | 0.0886 | 1.17  | 0.3153 |
| 102840_at   | 1455105_at   | Ptpn12          | protein tyrosine phosphatase, non-receptor 1    | -1.76 | 0.01 | 1.26  | 0.3139 | -1.14 | 0.6883 | 1.18  | 0.5087 | 1.29  | 0.402  |
| 102841_at   | 1435782_at   | LOC216818       | similar to ubiquitin A-52 residue ribosomal p   | 1.05  | 0.8  | -1.12 | 0.2582 | -1.1  | 0.2445 | -1.05 | 0.5319 | -1.03 | 0.8767 |
| 102843_s_at | 1451632_a_at | Igh-1a          | immunoglobulin heavy chain 1a (serum IgG)       | -1.63 | 0.48 | -1.31 | 0.2789 | -1.46 | 0.1637 | -1.03 | 0.8618 | 1.25  | 0.3951 |
| 102846_at   | 1449489_at   | Tssk2           | testis-specific serine kinase 2                 | 1.31  | 0.05 | -1.28 | 0.4942 | 1.23  | 0.5552 | 1.04  | 0.9132 | 1.45  | 0.5802 |
| 102847_s_at | 1422230_s_at | Cyp2a4 /// Cyp2 | cytochrome P450, family 2, subfamily a, pol     | 5.52  | 0    | 1.03  | 0.2846 | 1.04  | 0.0205 | 1.12  | 0      | 4.3   | 0.0003 |
| 102848_f_at | 1429244_at   | 2610524H06Rik   | RIKEN cDNA 2610524H06 gene                      | 1.87  | 0.15 | -1.21 | 0.5208 | 1.03  | 0.9076 | 1.18  | 0.4623 | 1.05  | 0.9023 |
| 102849_at   | 1418142_at   | Kcnj8           | potassium inwardly-rectifying channel, subfa    | 3.21  | 0.04 | 1.15  | 0.6195 | 1.12  | 0.7963 | 1.5   | 0.2702 | 1.41  | 0.3025 |
| 102850_at   | 1448298_at   | Tnk2            | tyrosine kinase, non-receptor, 2                | -1.17 | 0.6  | -1.64 | 0.0016 | -1.2  | 0.1038 | -1.54 | 0.001  | -1.52 | 0.3131 |
| 102851_s_at | 1460188_at   | Hcph            | hemopoietic cell phosphatase                    | 1.31  | 0.13 | 1.52  | 0.0313 | -1.06 | 0.7011 | 1.69  | 0.0678 | 1.02  | 0.9632 |
| 102852_at   | 1418815_at   | Cdh2            | cadherin 2                                      | -1.17 | 0.53 | -1.12 | 0.3099 | -1.17 | 0.1045 | -1.22 | 0.0699 | -1.52 | 0.0926 |
| 102853_at   | 1450950_at   | Cspg6           | chondroitin sulfate proteoglycan 6              | 1.92  | 0.35 | -1.27 | 0.0252 | 1.22  | 0.1584 | 1.25  | 0.0544 | 1.29  | 0.6444 |
| 102856_at   | 1451689_a_at | Sox10           | SRY-box containing gene 10                      | -1.76 | 0.02 | -1.07 | 0.5885 | 1.08  | 0.4589 | -1.09 | 0.3712 | 1.34  | 0.0121 |
| 102857_at   | 1451662_x_at | Akap4           | A kinase (PRKA) anchor protein 4                | -2.54 | 0.32 | 1.15  | 0.6969 | 1.29  | 0.3945 | -1.12 | 0.7348 | -1.27 | 0.2704 |
| 102858_at   | 1421137_a_at | Pkib            | protein kinase inhibitor beta, cAMP depende     | -1.14 | 0.68 | -1.01 | 0.9248 | -1.14 | 0.2045 | -1.06 | 0.7704 | -1.08 | 0.7902 |
| 102859_at   | 1433509_s_at | D6Ertd253e      | DNA segment, Chr 6, ERATO Doi 253, expr         | -1.11 | 0.68 | -1.2  | 0.0821 | -1.32 | 0.0488 | -1.4  | 0.0165 | 1.26  | 0.0988 |
| 102860_at   | 1424923_at   | Serpina3g       | serine (or cysteine) proteinase inhibitor, clac | 1.09  | 0.34 | 1.42  | 0.348  | -1.28 | 0.1471 | 1.74  | 0.2161 | 1.38  | 0.0301 |
| 102861_at   | 1417809_at   | Slc22a18        | solute carrier family 22 (organic cation transp | -1.04 | 0.68 | 1.05  | 0.552  | -1.33 | 0.0106 | -1.02 | 0.8303 | -1.05 | 0.6859 |
| 102862_at   | 1436344_at   | 5830404H04Rik   | RIKEN cDNA 5830404H04 gene                      | 1.09  | 0.61 | -1.03 | 0.5032 | -1.09 | 0.073  | -1.11 | 0.0497 | -1.4  | 0.0016 |
| 102863_at   | 1418801_at   | Zkscan1         | zinc finger with KRAB and SCAN domains 1        | 1.07  | 0.64 | 1.26  | 0.1163 | 1.15  | 0.2075 | 1.15  | 0.1042 | 1.09  | 0.6452 |
| 102864_at   | 1449499_at   | Hoxa7           | homeo box A7                                    | -1.49 | 0.17 | 1.16  | 0.1487 | 1.14  | 0.1701 | 1.11  | 0.1684 | 1.44  | 0.0179 |
| 102865_at   | 1421047_at   | Smad5           | MAD homolog 5 (Drosophila)                      | 1.16  | 0.62 | -1.17 | 0.239  | -1.13 | 0.3949 | -1.23 | 0.1973 | -1.71 | 0.2352 |
| 102866_at   | 1460683_at   | ---             | ---                                             | -1.61 | 0.03 | 1.05  | 0.5941 | 1.07  | 0.1574 | -1.01 | 0.8402 | 1.16  | 0.3141 |
| 102868_g_at | 1426337_a_at | Tead4           | TEA domain family member 4                      | -1.1  | 0.78 | 1.21  | 0.1682 | 1.14  | 0.1302 | 1.01  | 0.9497 | 1.77  | 0.2251 |
| 102869_at   | 1417521_at   | Efn2            | ephrin A2                                       | -1.14 | 0.83 | 1.35  | 0.1633 | 1.19  | 0.4138 | -1.25 | 0.4366 | 1.63  | 0.0277 |
| 102871_at   | 1418051_at   | Ephb6           | Eph receptor B6                                 | -1.16 | 0.78 | -1.6  | 0.0194 | -1.62 | 0.0052 | -1.43 | 0.0309 | 1.28  | 0.5917 |
| 102872_f_at | 1424706_at   | Zfp51           | zinc finger protein 51                          | 1.16  | 0.41 | 1.14  | 0.3498 | 1.01  | 0.9514 | 1.23  | 0.2943 | 1.09  | 0.6507 |
| 102875_at   | 1434563_at   | Rps6kc1         | ribosomal protein S6 kinase polypeptide 1       | 1.86  | 0.22 | 1.2   | 0.2017 | -1.09 | 0.6236 | 1.25  | 0.0717 | -1.47 | 0.4461 |
| 102876_at   | 1422867_at   | Gzmg            | granzyme G                                      | -1.81 | 0.02 | 1.05  | 0.5981 | 1.09  | 0.4215 | -1.01 | 0.9332 | 1.07  | 0.7016 |
| 102877_at   | 1419060_at   | Gzmb            | granzyme B                                      | 1.14  | 0.83 | 2.03  | 0.0379 | 1.33  | 0.3254 | 1.75  | 0.1473 | 2.05  | 0.0355 |
| 102878_at   | 1416602_a_at | Rad52           | RAD52 homolog (S. cerevisiae)                   | 1.04  | 0.87 | 1.03  | 0.6877 | 1.04  | 0.5802 | 1.23  | 0.0137 | 1.33  | 0.0186 |
| 102879_s_at | 1417876_at   | Fcgr1           | Fc receptor, IgG, high affinity I               | 1.35  | 0.24 | 1.24  | 0.4563 | -1.08 | 0.3422 | 1.83  | 0.2711 | -1.03 | 0.8655 |
| 102880_at   | 1427341_at   | E13010317Rik    | RIKEN cDNA E13010317 gene                       | 1.33  | 0.05 | -1.09 | 0.4506 | -1.11 | 0.2366 | -1.15 | 0.1514 | 1.1   | 0.2341 |
| 102882_at   | 1425231_a_at | Zfp46           | zinc finger protein 46                          | 1.86  | 0.18 | 1.16  | 0.7122 | 1.63  | 0.1554 | 1.86  | 0.1538 | 1.26  | 0.5265 |
| 102883_at   | 1426891_at   | Rpap1           | RNA polymerase II associated protein 1          | 2.2   | 0.08 | -1.04 | 0.6403 | 1.08  | 0.3516 | 1.1   | 0.1817 | 1.12  | 0.3097 |
| 102884_at   | 1418110_a_at | Inpp5d          | inositol polyphosphate-5-phosphatase D          | -1.43 | 0.15 | 1.36  | 0.2851 | -1.12 | 0.4783 | 1.96  | 0.3358 | 1.28  | 0.1979 |
| 102885_at   | 1452007_at   | Sybl1           | synaptobrevin like 1                            | -1.04 | 0.83 | 1.03  | 0.8456 | -1.06 | 0.6182 | 1.02  | 0.8564 | -2.58 | 0.001  |
| 102886_at   | 1421088_at   | Gpc4            | glypican 4                                      | -1.62 | 0.05 | -1.1  | 0.1771 | -1.17 | 0.0779 | -1.17 | 0.0297 | -1    | 0.9954 |
| 102887_at   | 1449033_at   | Tnfrsf11b       | tumor necrosis factor receptor superfamily, r   | -1.19 | 0.28 | 1.07  | 0.6375 | 1.11  | 0.4216 | 1.03  | 0.8665 | 1.2   | 0.4082 |
| 102888_s_at | 1417627_a_at | Limk1           | LIM-domain containing, protein kinase           | -1.13 | 0.81 | 1.19  | 0.3752 | -1.22 | 0.3634 | 1.28  | 0.2894 | 1.59  | 0.1563 |
| 102890_at   | 1416825_at   | Snta1           | syntrophin, acidic 1                            | -1.14 | 0.18 | -1.03 | 0.5592 | -1.04 | 0.4429 | -1.03 | 0.3524 | -1.18 | 0.2467 |
| 102891_at   | 1450163_a_at | Wrn             | Werner syndrome homolog (human)                 | -1.39 | 0.08 | 1.03  | 0.8053 | 1.02  | 0.8664 | 1.01  | 0.9481 | -1.61 | 0.3728 |
| 102892_at   | 1416956_at   | Kcnab2          | potassium voltage-gated channel, shaker-re      | 1.01  | 0.98 | 1.01  | 0.9706 | -1.02 | 0.9079 | 1     | 0.9811 | 1.25  | 0.4034 |
| 102894_g_at | 1419716_a_at | Pou2f1          | POU domain, class 2, transcription factor 1     | -1.04 | 0.77 | 1.29  | 0.1539 | -1.38 | 0.1818 | -1.04 | 0.892  | 1.31  | 0.0572 |
| 102895_at   | 1453576_at   | Nipbl           | Nipped-B homolog (Drosophila)                   | 1.3   | 0.07 | 1.1   | 0.1201 | 1.09  | 0.3514 | 1.13  | 0.1106 | -1.22 | 0.5835 |
| 102896_at   | 1417790_at   | Dok1            | docking protein 1                               | -1.62 | 0.05 | 1.03  | 0.8098 | -1.03 | 0.7944 | -1.04 | 0.7585 | 1.62  | 0.0055 |
| 102898_at   | 1425379_at   | Hgf             | hepatocyte growth factor                        | -1.25 | 0.82 | 1.18  | 0.2444 | -1.22 | 0.3953 | -1.03 | 0.8356 | -1.74 | 0.3847 |
| 102899_at   | 1420902_at   | St6galnac3      | ST6 (alpha-N-acetyl-neuraminy)-2,3-beta-ga      | -1.51 | 0.36 | 1.03  | 0.7782 | 1.31  | 0.0911 | -1.06 | 0.5752 | 1.65  | 0.0303 |
| 102900_at   | 1427523_at   | Six3            | sine oculis-related homeobox 3 homolog (D       | -3.67 | 0.25 | 1.25  | 0.662  | -1.31 | 0.5883 | -1.25 | 0.6517 | 2.52  | 0.0882 |
| 102901_at   | 1426638_at   | Six3            | sine oculis-related homeobox 3 homolog (D       | -1.25 | 0.46 | 1.48  | 0.0444 | 1.64  | 0.0247 | 1.29  | 0.2478 | 1.16  | 0.2257 |
| 102902_at   | 1425041_at   | Lhx3            | LIM homeobox protein 3                          | -2.61 | 0.29 | 1.21  | 0.6544 | 1.74  | 0.1628 | 1.17  | 0.573  | -1.15 | 0.5798 |
| 102904_at   | 1422892_s_at | ---             | ---                                             | 2     | 0.07 | 1.22  | 0.6486 | -1.65 | 0.0439 | -1    | 0.9896 | -1.14 | 0.8064 |

|             |              |                  |                                                 |       |      |       |        |       |        |       |        |       |        |
|-------------|--------------|------------------|-------------------------------------------------|-------|------|-------|--------|-------|--------|-------|--------|-------|--------|
| 102905_at   | 1449591_at   | Casp11           | caspace 11, apoptosis-related cysteine prot     | 1.26  | 0.18 | -1.03 | 0.8479 | -1.04 | 0.801  | 1.28  | 0.2606 | 1.09  | 0.6286 |
| 102906_at   | 1449009_at   | Tgtp             | T-cell specific GTPase                          | -1.01 | 0.99 | 3.21  | 0.2298 | -3.57 | 0.0675 | 3.61  | 0.1448 | 2.98  | 0.3568 |
| 102907_at   | 1454862_at   | Phldb2           | pleckstrin homology-like domain, family B, nr   | 1.07  | 0.7  | 1.16  | 0.091  | 1.13  | 0.4914 | 1.16  | 0.0884 | 1.05  | 0.7943 |
| 102908_at   | 1417337_at   | Epb4.2           | erythrocyte protein band 4.2                    | 1.37  | 0.55 | -1.14 | 0.6654 | -1.5  | 0.1985 | 1.24  | 0.4833 | -1.67 | 0.2483 |
| 102910_at   | 1419759_at   | Abcb1a           | ATP-binding cassette, sub-family B (MDR/T,      | 7.22  | 0.02 | 1.51  | 0.003  | 1.24  | 0.1743 | 1.64  | 0.0017 | 1.98  | 0.0749 |
| 102911_at   | 1419076_a_at | Brca2            | breast cancer 2                                 | 2.23  | 0.13 | 1.27  | 0.0549 | 1.27  | 0.0055 | 1.22  | 0.1411 | -2.23 | 0.0477 |
| 102913_at   | 1437913_at   | Bcl2a1a /// Bcl2 | B-cell leukemia/lymphoma 2 related protein      | -4.09 | 0.36 | -1.35 | 0.4572 | -1.5  | 0.3631 | -1.19 | 0.7127 | 1.16  | 0.784  |
| 102915_at   | 1448931_at   | F2r11            | coagulation factor II (thrombin) receptor-like  | -1.83 | 0.45 | -1.17 | 0.7073 | -1.04 | 0.9167 | -1.06 | 0.8809 | 1.43  | 0.5687 |
| 102916_s_at | 1450798_at   | Tnxb             | tenascin XB                                     | 2.08  | 0.1  | -1.09 | 0.7844 | -1.45 | 0.2469 | -2.2  | 0.0186 | 1.75  | 0.2298 |
| 102917_at   | 1421210_at   | C2ta             | class II transactivator                         | -1.92 | 0.31 | 1.16  | 0.5767 | -1.1  | 0.3154 | 1.03  | 0.8563 | -1.06 | 0.817  |
| 102918_at   | 1449199_at   | Muc1             | mucin 1, transmembrane                          | 1.49  | 0.25 | -1.22 | 0.5501 | -1.09 | 0.769  | -1.21 | 0.5682 | 1.32  | 0.1766 |
| 102919_at   | 1418616_at   | Mafk             | v-maf musculoaponeurotic fibrosarcoma onc       | 1.04  | 0.79 | -1.01 | 0.854  | -1.03 | 0.7018 | 1.12  | 0.1844 | 1.16  | 0.4794 |
| 102921_s_at | 1460251_at   | Fas              | Fas (TNF receptor superfamily member)           | 1.98  | 0.23 | 1.22  | 0.5906 | -1.25 | 0.2757 | 1.19  | 0.5734 | -3.04 | 0.0202 |
| 102922_at   | 1435066_at   | Pitpnc1          | phosphatidylinositol transfer protein, cytopla  | 1.01  | 0.95 | 1.02  | 0.7917 | 1.17  | 0.0606 | 1.16  | 0.1547 | 1.41  | 0.062  |
| 102923_at   | 1425892_a_at | Pnoc             | prepronociceptin                                | 1.04  | 0.88 | 1.11  | 0.2413 | 1.19  | 0.1082 | 1.08  | 0.4213 | 1.04  | 0.8224 |
| 102924_at   | 1425822_a_at | Dtx1             | deltex 1 homolog (Drosophila)                   | -1.83 | 0.02 | 1.02  | 0.8389 | -1    | 0.9891 | 1.01  | 0.9236 | 1.54  | 0.0103 |
| 102925_at   | 1454737_at   | Dusp9            | dual specificity phosphatase 9                  | 1.06  | 0.94 | 1.14  | 0.4236 | 1.03  | 0.8996 | 1.24  | 0.3642 | -1.03 | 0.9004 |
| 102926_at   | 1418880_at   | Gfra3            | glial cell line derived neurotrophic factor fam | 1.06  | 0.76 | 1.04  | 0.7654 | 1.09  | 0.2283 | -1.04 | 0.695  | 1.3   | 0.058  |
| 102927_s_at | 1425969_a_at | Hdh              | Huntington disease gene homolog                 | 1.55  | 0.58 | -1.2  | 0.297  | -1.23 | 0.3066 | -1.23 | 0.2122 | -1.43 | 0.0903 |
| 102930_at   | 1422523_at   | Si               | silver                                          | 1.45  | 0.19 | 1.39  | 0.0451 | 1.5   | 0.0037 | 1.46  | 0.0155 | 1.98  | 0.1097 |
| 102931_at   | 1448386_a_at | Wap              | whey acidic protein                             | 1.07  | 0.78 | 1.17  | 0.2846 | 1.06  | 0.7207 | 1.09  | 0.5509 | 1.45  | 0.3238 |
| 102932_at   | 1449706_s_at | Nr5a2            | nuclear receptor subfamily 5, group A, mem1     | 1.88  | 0.08 | -1.01 | 0.9642 | -1.24 | 0.162  | -1.11 | 0.4135 | 1.11  | 0.7016 |
| 102933_at   | 1420995_at   | Plxna3           | plexin A3                                       | -1.15 | 0.75 | -1.52 | 0.0031 | -1.42 | 0.0445 | -1.4  | 0.0042 | -1.24 | 0.5644 |
| 102935_at   | 1422252_a_at | Cdc25c           | cell division cycle 25 homolog C (S. cerevisi   | -2.71 | 0.15 | -1.45 | 0.1677 | -1.2  | 0.4967 | -1.31 | 0.4159 | 1.37  | 0.4136 |
| 102936_at   | 1460329_at   | B4galt6          | UDP-Gal:betaGlcNAc beta 1,4-galactosyltra       | 1.67  | 0.28 | -1.13 | 0.4719 | 1.05  | 0.8374 | -1.06 | 0.7783 | -1    | 0.9855 |
| 102938_at   | 1449492_a_at | Lect2            | leukocyte cell-derived chemotaxin 2             | 1.7   | 0.1  | -1.42 | 0.0004 | -1.14 | 0.1363 | -1.28 | 0.0008 | -1.26 | 0.0277 |
| 102939_s_at | 1419768_at   | Cd22             | CD22 antigen                                    | 1.03  | 0.9  | 1.59  | 0.2845 | 1     | 0.989  | 1.8   | 0.0409 | -1.36 | 0.5238 |
| 102940_at   | 1419135_at   | Ltb              | lymphotoxin B                                   | -1.04 | 0.9  | 1.81  | 0.0818 | -1.46 | 0.0551 | 2.02  | 0.1858 | 1.98  | 0.0864 |
| 102941_at   | 1448009_at   | Ugcgl1           | UDP-glucose ceramide glucosyltransferase-       | 1.13  | 0.8  | -1.09 | 0.3321 | 1.05  | 0.6694 | 1.02  | 0.8276 | -1.56 | 0.0061 |
| 102942_at   | 1428794_at   | 2810012G08Rik    | RIKEN cDNA 2810012G08 gene                      | 3.9   | 0.07 | 1.32  | 0.2654 | 1.42  | 0.0089 | 1.84  | 0.0998 | 1.53  | 0.1585 |
| 102943_at   | 1428612_at   | Apg7l            | autophagy 7-like (S. cerevisiae)                | 1.08  | 0.72 | -1.16 | 0.0502 | -1.34 | 0.0006 | -1.19 | 0.0156 | -1.09 | 0.4599 |
| 102944_at   | 1455060_at   | MGI:1351465      | Ras-GTPase-activating protein SH3-domain        | -1.09 | 0.61 | -1.06 | 0.3783 | 1.07  | 0.2849 | 1.03  | 0.5778 | -1.52 | 0.1527 |
| 102947_at   | 1419117_at   | Slc22a2          | solute carrier family 22 (organic cation trans  | 1.42  | 0.47 | -1.21 | 0.2305 | -1.04 | 0.778  | -1.21 | 0.1665 | 1.45  | 0.1653 |
| 102950_at   | 1422400_a_at | Hemt1            | hematopoietic cell transcript 1                 | 2.05  | 0.02 | 1.33  | 0.258  | 1.24  | 0.396  | -1.16 | 0.4698 | 1.07  | 0.876  |
| 102952_g_at | 1427505_a_at | Cradd            | CASP2 and RIPK1 domain containing adapt         | 1.32  | 0.2  | 1.13  | 0.239  | -1.03 | 0.6796 | 1.04  | 0.6275 | -1.03 | 0.8689 |
| 102954_at   | 1452511_at   | Sox5             | SRY-box containing gene 5                       | -1.79 | 0.45 | -1.29 | 0.4284 | -1.1  | 0.8143 | -1.71 | 0.1141 | 1.99  | 0.23   |
| 102955_at   | 1418932_at   | Nfil3            | nuclear factor, interleukin 3, regulated        | -1.83 | 0.18 | -1.39 | 0.007  | -1.76 | 0.001  | -1.56 | 0.0068 | -1.39 | 0.1097 |
| 102956_at   | 1449559_at   | Msx2             | homeo box, msh-like 2                           | -1.07 | 0.78 | 1.13  | 0.3272 | 1.3   | 0.0538 | 1.32  | 0.0184 | 1.14  | 0.4397 |
| 102957_at   | 1418641_at   | Lcp2             | lymphocyte cytosolic protein 2                  | 1.59  | 0.19 | 1.4   | 0.3851 | -1.42 | 0.0781 | 1.53  | 0.3493 | -1.14 | 0.5383 |
| 102958_at   | 1418494_at   | Ebf2             | early B-cell factor 2                           | -1.66 | 0.17 | -1.33 | 0.3934 | 1.16  | 0.614  | -1.2  | 0.531  | 1.91  | 0.0457 |
| 102960_at   | 1448948_at   | Rga              | recombination activating gene 1 gene activa     | 1.3   | 0.03 | 1.05  | 0.3754 | 1.05  | 0.4864 | 1.23  | 0.0015 | 1.5   | 0.0029 |
| 102961_at   | 1449242_s_at | Hrg              | histidine-rich glycoprotein                     | 1.16  | 0.41 | 1.16  | 0.0228 | -1.08 | 0.0518 | 1.32  | 0      | 1.56  | 0.0009 |
| 102962_at   | 1449898_at   | 1-Sep            | septin 1                                        | -2.15 | 0.04 | -1.07 | 0.6672 | 1.09  | 0.4855 | 1.07  | 0.7311 | -1.01 | 0.9808 |
| 102963_at   | 1417878_at   | E2f1             | E2F transcription factor 1                      | 1.75  | 0.27 | 1.78  | 0.1498 | -1.01 | 0.9633 | 1.36  | 0.3284 | 1.3   | 0.491  |
| 102964_at   | 1424237_at   | Zfp639           | zinc finger protein 639                         | 1.13  | 0.63 | 1.16  | 0.1163 | 1.37  | 0.0208 | 1.14  | 0.1705 | 1.21  | 0.2379 |
| 102965_at   | 1427091_at   | Al481105         | expressed sequence Al481105                     | -1.4  | 0.26 | -1.07 | 0.6139 | -1.17 | 0.1335 | 1.15  | 0.3991 | -1.61 | 0.0395 |
| 102966_at   | 1434311_at   | Cnot6l           | CCR4-NOT transcription complex, subunit 6       | 1.26  | 0.37 | 1.16  | 0.1498 | 1.35  | 0.0395 | 1.2   | 0.0415 | 1.04  | 0.8388 |
| 102967_at   | 1423328_at   | Gdap1            | ganglioside-induced differentiation-associat    | 2.39  | 0.15 | 1.37  | 0.0779 | -1.02 | 0.8772 | 1.21  | 0.2893 | 1.77  | 0.0799 |
| 102968_at   | 1418216_at   | Ggta1            | gamma-glutamyltransferase-like activity 1       | 2.29  | 0.14 | 1.01  | 0.9669 | -1.02 | 0.8545 | 1.13  | 0.5176 | 1.45  | 0.4702 |
| 102969_at   | 1430417_s_at | 0610025P10Rik    | RIKEN cDNA 0610025P10 gene                      | -1.06 | 0.82 | 1.03  | 0.7623 | 1.22  | 0.0236 | 1.13  | 0.2349 | 1.8   | 0.0025 |
| 102970_at   | 1425271_at   | Psmc3ip          | proteasome (prosome, macropain) 26S sub         | -1.51 | 0.35 | 1.13  | 0.4371 | 1.2   | 0.2286 | 1.11  | 0.2695 | 1.3   | 0.2601 |
| 102971_at   | 1422105_at   | Cd3e             | CD3 antigen, epsilon polypeptide                | -1.54 | 0.02 | 1.74  | 0.1354 | 1.26  | 0.0164 | 1.26  | 0.1767 | 1.69  | 0.021  |
| 102972_s_at | 1427307_a_at | Dab1             | disabled homolog 1 (Drosophila)                 | -2.99 | 0.08 | -1.37 | 0.1039 | 1.31  | 0.1123 | 1     | 0.9943 | 1.72  | 0.1017 |



|             |              |                  |                                                  |       |      |       |        |       |        |       |        |       |        |
|-------------|--------------|------------------|--------------------------------------------------|-------|------|-------|--------|-------|--------|-------|--------|-------|--------|
| 102974_at   | 1449498_at   | Marco            | macrophage receptor with collagenous struc       | 3.86  | 0.05 | 1.44  | 0.4876 | -1.02 | 0.9546 | 3.09  | 0.1438 | 1.18  | 0.2125 |
| 102975_at   | 1425335_at   |                  | Cd8a CD8 antigen, alpha chain                    | -1.45 | 0.44 | 1.28  | 0.3549 | 1.36  | 0.4379 | 1.14  | 0.582  | 1.77  | 0.0775 |
| 102976_at   | 1424629_at   | Brca1            | breast cancer 1                                  | 2.02  | 0.03 | 1.32  | 0.1029 | 1.19  | 0.3078 | 1.67  | 0.0069 | 1.6   | 0.1709 |
| 102977_at   | 1420516_at   | a                | nonagouti                                        | -1.23 | 0.4  | -1.2  | 0.1935 | 1.12  | 0.3423 | -1.16 | 0.2449 | 1.06  | 0.8102 |
| 102978_at   | 1448010_at   | A430104N18Ri     | RIKEN cDNA A430104N18 gene                       | -1.13 | 0.39 | 1.45  | 0.0179 | 1.13  | 0.5045 | 1.51  | 0.0251 | 1.08  | 0.315  |
| 102979_at   | 1436167_at   | LOC435684        | similar to Shb-like adapter protein, Shf - hurr  | 4.25  | 0    | 1.13  | 0.4505 | 1.28  | 0.2448 | 1.2   | 0.2806 | 1.88  | 0.1881 |
| 102980_at   | 1454941_at   | AW536594         | expressed sequence AW536594                      | -1.58 | 0.02 | -1.13 | 0.1431 | -1.02 | 0.8202 | -1.22 | 0.0016 | 1.06  | 0.5454 |
| 102982_at   | 1454872_at   | B230308N11Ri     | RIKEN cDNA B230308N11 gene                       | 2.74  | 0.04 | 1.05  | 0.4183 | 1.08  | 0.5402 | -1.02 | 0.7626 | -1.22 | 0.1329 |
| 102984_g_at | 1448208_at   | Smad1            | MAD homolog 1 (Drosophila)                       | -1.58 | 0.04 | -1.09 | 0.2519 | 1.05  | 0.6    | -1.13 | 0.0611 | -1.07 | 0.6119 |
| 102985_at   | 1454042_a_at | Srpk1            | serine/arginine-rich protein specific kinase 1   | -1.47 | 0.23 | 1.04  | 0.7496 | 1.12  | 0.4137 | 1.14  | 0.3523 | 1.12  | 0.3137 |
| 102986_at   | 1418420_at   | Myod1            | myogenic differentiation 1                       | -1.51 | 0.03 | -1.2  | 0.0288 | -1.19 | 0.0425 | -1.11 | 0.1912 | 1.32  | 0.2157 |
| 102988_at   | 1460394_a_at | Inpp1            | inositol polyphosphate phosphatase-like 1        | -1.02 | 0.77 | -1.06 | 0.4902 | -1.19 | 0.0957 | -1.22 | 0.0465 | 1.54  | 0.2127 |
| 102989_at   | 1450645_at   | ---              | ---                                              | 1.06  | 0.85 | -1.98 | 0.3941 | -2.11 | 0.3638 | -2.09 | 0.3669 | -1.29 | 0.2411 |
| 102990_at   | 1427884_at   | Col3a1           | procollagen, type III, alpha 1                   | 2.24  | 0.08 | -1.37 | 0.1856 | -1.53 | 0.05   | -1.62 | 0.0255 | 1.19  | 0.7455 |
| 102991_s_at | 1454987_a_at | H2-Ke6           | H2-K region expressed gene 6                     | 1.88  | 0    | 1.21  | 0.0261 | 1.13  | 0.0811 | 1.15  | 0.1106 | -1.07 | 0.6169 |
| 102993_at   | 1418483_a_at | Ggt1             | glycoprotein galactosyltransferase alpha 1, 2    | -1.1  | 0.69 | 1.21  | 0.077  | 1.12  | 0.1763 | 1.19  | 0.1526 | 1.31  | 0.0299 |
| 102994_at   | 1448713_at   | Stat4            | signal transducer and activator of transcripti   | -2.74 | 0.02 | -1.26 | 0.4399 | -1    | 0.9987 | -1.09 | 0.8134 | 1.86  | 0.1799 |
| 102995_s_at | 1417898_a_at | Gzma             | granzyme A                                       | -1.22 | 0.44 | 1.65  | 0.088  | 1.25  | 0.3058 | 1.65  | 0.1682 | 1.39  | 0.3195 |
| 102996_at   | 1460643_at   | Ell              | elongation factor RNA polymerase II              | 1.1   | 0.46 | 1.16  | 0.0019 | 1.09  | 0.1604 | 1.17  | 0.0211 | 1.26  | 0.0808 |
| 102998_at   | 1450715_at   | Cyp1a2           | cytochrome P450, family 1, subfamily a, poly     | -1.26 | 0.18 | 1.24  | 0.0038 | -1.16 | 0.0968 | 1.23  | 0.0116 | 1.78  | 0.0273 |
| 103001_at   | 1451803_a_at | Vegfb            | vascular endothelial growth factor B             | 1.03  | 0.72 | 1.29  | 0.0297 | 1.24  | 0.0201 | 1.21  | 0.0213 | 1.85  | 0.0044 |
| 103002_at   | 1418014_a_at | B4galt1          | UDP-Gal:betaGlcNAc beta 1,4- galactosyltra       | -1.6  | 0.09 | -1.25 | 0.0072 | -1.21 | 0.0133 | -1.29 | 0.0039 | -1.25 | 0.0976 |
| 103005_s_at | 1452483_a_at | Cd44             | CD44 antigen                                     | -1.25 | 0.05 | 1.53  | 0.3436 | -1.33 | 0.1736 | 1.9   | 0.2521 | 1.87  | 0.3252 |
| 103006_at   | 1425927_a_at | Atf5             | activating transcription factor 5                | 1.13  | 0.75 | -1.25 | 0.0221 | -1.2  | 0.2564 | -1.63 | 0.0046 | -1.68 | 0.062  |
| 103007_at   | 1416895_at   | Efna1            | efhrin A1                                        | 1.71  | 0.27 | 1.39  | 0.0654 | -1.07 | 0.7173 | 1.46  | 0.0135 | 1.31  | 0.5947 |
| 103009_at   | 1450050_at   | Hira             | histone cell cycle regulation defective homol    | 3.48  | 0.02 | 1.19  | 0.1215 | 1.31  | 0.0498 | 1.17  | 0.3283 | -1.54 | 0.0826 |
| 103011_at   | 1449343_s_at | Sin3a            | transcriptional regulator, SIN3A (yeast)         | -1.19 | 0.08 | 1.03  | 0.6248 | -1.05 | 0.499  | -1.02 | 0.722  | 1.43  | 0.0074 |
| 103012_at   | 1419426_s_at | Ccl21b /// Ccl21 | chemokine (C-C motif) ligand 21b (serine) ///    | 1.99  | 0.33 | 1.08  | 0.722  | -1.07 | 0.6766 | 1.04  | 0.7703 | 1.18  | 0.5897 |
| 103013_at   | 1460228_at   | Usf2             | upstream transcription factor 2                  | 1.15  | 0.35 | -1.3  | 0.0233 | -1    | 0.9746 | -1.19 | 0.0791 | -1.06 | 0.6573 |
| 103015_at   | 1421818_at   | Bcl6             | B-cell leukemia/lymphoma 6                       | 2.17  | 0.1  | 3.27  | 0      | 1.64  | 0.0565 | 3.84  | 0      | -1.05 | 0.8474 |
| 103016_s_at | 1449164_at   | Cd68             | CD68 antigen                                     | 1.23  | 0.49 | -1.04 | 0.8203 | -1.13 | 0.0532 | 1.31  | 0.3983 | -1.09 | 0.6055 |
| 103017_at   | 1449670_x_at | Tm7sf1           | transmembrane 7 superfamily member 1             | 2.1   | 0.05 | 1.4   | 0.1451 | -1.24 | 0.4293 | 1.54  | 0.1466 | 1.53  | 0.2988 |
| 103018_at   | 1424274_at   | MGI:1929095      | vesicle docking protein                          | 1.34  | 0.16 | -1.28 | 0.0025 | -1.09 | 0.1644 | -1.16 | 0.0677 | -1.81 | 0.0021 |
| 103020_s_at | 1424850_at   | Map3k1           | mitogen activated protein kinase kinase kina     | 1.31  | 0.61 | 1.13  | 0.5964 | -1.13 | 0.4681 | 1.47  | 0.0346 | 1.25  | 0.2609 |
| 103023_at   | 1417043_at   | Lcat             | lecithin cholesterol acyltransferase             | -1.09 | 0.63 | -1.07 | 0.3612 | 1.05  | 0.6948 | -1.11 | 0.1067 | 1.14  | 0.3452 |
| 103024_at   | 1416871_at   | Adam8            | a disintegrin and metalloprotease domain 8       | 1.01  | 0.97 | 1.76  | 0.185  | 1.2   | 0.0984 | 2.64  | 0.3036 | 1.35  | 0.181  |
| 103025_at   | 1416380_at   | Mov10            | Moloney leukemia virus 10                        | -1.39 | 0.13 | 1.07  | 0.5345 | -1.02 | 0.8902 | 1.31  | 0.0526 | 1.11  | 0.4991 |
| 103027_at   | 1433867_at   | 1810030O07Ri     | RIKEN cDNA 1810030O07 gene                       | 1.41  | 0.02 | 1.21  | 0.0381 | 1.15  | 0.3204 | 1.24  | 0.0073 | 1.07  | 0.757  |
| 103028_at   | 1417171_at   | Itk              | IL2-inducible T-cell kinase                      | -1.96 | 0.14 | 1.11  | 0.4405 | 1.05  | 0.7564 | 1.02  | 0.8766 | 1.43  | 0.2038 |
| 103029_at   | 1418840_at   | Pdcd4            | programmed cell death 4                          | -1.21 | 0.28 | -1.04 | 0.5477 | -1.03 | 0.8598 | -1.12 | 0.2382 | 1.11  | 0.5429 |
| 103031_g_at | 1460365_a_at | Dnm1             | dynamain 1                                       | -1.2  | 0.19 | -1.09 | 0.2106 | -1.03 | 0.6527 | -1.13 | 0.07   | 1.3   | 0.1265 |
| 103032_at   | 1421733_a_at | Tpst1            | protein-tyrosine sulfotransferase 1              | 1.02  | 0.87 | -1.08 | 0.1194 | 1.02  | 0.7324 | -1.03 | 0.5109 | 1.23  | 0.1798 |
| 103033_at   | 1418021_at   | C4               | complement component 4 (within H-2S)             | -1.27 | 0.12 | 1.19  | 0.3386 | 1.09  | 0.6174 | -1.54 | 0.1398 | -2.64 | 0.0006 |
| 103035_at   | 1416016_at   | ---              | ---                                              | 1.25  | 0.08 | 1.48  | 0.289  | -1.37 | 0.0825 | 1.57  | 0.2298 | -1.44 | 0.1742 |
| 103036_at   | 1417437_at   | G22p1            | thyroid autoantigen                              | 1.8   | 0.36 | 1.29  | 0.0571 | 1.26  | 0.2096 | 1.39  | 0.0225 | -1.77 | 0.0165 |
| 103037_at   | 1449093_at   | Ctfr             | cardiotrophin 1                                  | -1.28 | 0.46 | 1.03  | 0.7649 | -1.05 | 0.5809 | 1.15  | 0.1778 | 1.25  | 0.0747 |
| 103038_at   | 1421061_at   | Guca1a           | guanylate cyclase activator 1a (retina)          | 2.93  | 0.03 | -1.4  | 0.0872 | -1.09 | 0.6056 | -1.16 | 0.4252 | -1.31 | 0.1457 |
| 103039_at   | 1423267_s_at | Itga5            | integrin alpha 5 (fibronectin receptor alpha)    | -2.79 | 0.34 | -1.08 | 0.6555 | 1.03  | 0.8979 | -1.11 | 0.5672 | 1.16  | 0.5608 |
| 103040_at   | 1416111_at   | Cd83             | CD83 antigen                                     | 5.23  | 0.01 | 1.32  | 0.4882 | -1.39 | 0.3148 | 1.68  | 0.1297 | 4.95  | 0.0018 |
| 103044_g_at | 1455710_x_at | Mtcp1            | mature T-cell proliferation 1                    | -1.28 | 0.4  | -1.09 | 0.1906 | -1.1  | 0.1476 | -1.17 | 0.0192 | 1.09  | 0.2291 |
| 103045_at   | 1425755_at   | Mtcp1 /// LOC43  | mature T-cell proliferation 1 /// similar to p13 | -1.29 | 0.48 | 1.4   | 0.0325 | -1.04 | 0.8273 | 1.46  | 0.0406 | -2.05 | 0.0417 |
| 103046_at   | 1448949_at   | Car4             | carbonic anhydrase 4                             | -1.81 | 0.53 | 1.22  | 0.5584 | 1.42  | 0.325  | 1.31  | 0.3318 | 1.56  | 0.0944 |
| 103047_at   | 1420711_a_at | Pxmp3            | peroxisomal membrane protein 3                   | 1.39  | 0.3  | -1.02 | 0.8292 | 1.15  | 0.4701 | 1.1   | 0.3787 | -1.26 | 0.097  |

|             |              |                 |                                                 |       |      |        |        |       |        |        |        |       |        |
|-------------|--------------|-----------------|-------------------------------------------------|-------|------|--------|--------|-------|--------|--------|--------|-------|--------|
| 103048_at   | 1417155_at   | Nmyc1           | neuroblastoma myc-related oncogene 1            | -1.15 | 0.84 | -1.57  | 0.1468 | -1.08 | 0.7845 | -2.05  | 0.0158 | -2.9  | 0.0661 |
| 103050_at   | 1417447_at   | Tcf21           | transcription factor 21                         | 2     | 0.08 | -1.02  | 0.7555 | -1.04 | 0.7075 | -1.05  | 0.5009 | -1.05 | 0.8677 |
| 103051_at   | 1417160_s_at | Expi            | extracellular proteinase inhibitor              | 1.45  | 0.55 | -1.87  | 0.0309 | -2.03 | 0.0265 | -1.53  | 0.0712 | -1.15 | 0.4903 |
| 103052_r_at | 1416158_at   | Nr2f2           | nuclear receptor subfamily 2, group F, mem1     | -1.07 | 0.71 | 1.25   | 0.0503 | 1.26  | 0.0653 | 1.23   | 0.108  | 1.07  | 0.7732 |
| 103053_at   | 1419391_at   | Myog            | myogenin                                        | -1.86 | 0.12 | 1.24   | 0.4616 | 1.45  | 0.0484 | 1.17   | 0.2079 | 1.12  | 0.7154 |
| 103054_at   | 1426242_at   | ---             | ---                                             | -1.33 | 0.12 | -1.14  | 0.0433 | -1.03 | 0.7212 | -1.04  | 0.6171 | 1.63  | 0.0434 |
| 103055_r_at | 1422311_a_at | Polr2a          | polymerase (RNA) II (DNA directed) polypep      | -2.28 | 0    | 1.01   | 0.9426 | -1.01 | 0.9055 | -1     | 0.9901 | 1.54  | 0.0139 |
| 103056_at   | 1454817_at   | Wdr50           | WD repeat domain 50                             | 1.7   | 0.2  | 1.08   | 0.1735 | 1.21  | 0.0191 | 1.15   | 0.1373 | 1.2   | 0.1913 |
| 103057_at   | 1448187_at   | Pold1           | polymerase (DNA directed), delta 1, catalytic   | 1.09  | 0.81 | 1.1    | 0.2634 | -1.08 | 0.4832 | 1.2    | 0.0103 | -1.03 | 0.8813 |
| 103058_f_at | 1420527_s_at | Tcp10a /// Tcp1 | t-complex protein 10a /// t-complex protein 1   | 1.66  | 0.42 | 1.48   | 0.0019 | 1.78  | 0.0404 | 1.51   | 0.1035 | -1.04 | 0.8992 |
| 103059_at   | 1418374_at   | Fxyd3           | FXYD domain-containing ion transport regul      | 1.48  | 0.47 | -1.32  | 0.4808 | 1.32  | 0.6126 | 1.33   | 0.4429 | 1.27  | 0.4889 |
| 103060_at   | 1434121_at   | Lgi4            | leucine-rich repeat LGI family, member 4        | 2.13  | 0.12 | 1.36   | 0.1133 | 1.28  | 0.1288 | 1.35   | 0.0803 | -1.04 | 0.901  |
| 103061_at   | 1416561_at   | Gad1            | glutamic acid decarboxylase 1                   | 1.49  | 0.28 | 1.57   | 0.3284 | 2     | 0.1148 | 1.13   | 0.7229 | -1.17 | 0.8398 |
| 103063_at   | 1425495_at   | Zfp62           | zinc finger protein 62                          | 1.47  | 0.23 | 1.18   | 0.0577 | 1.11  | 0.5272 | 1.15   | 0.2142 | -1.19 | 0.3206 |
| 103064_at   | 1449708_s_at | Chek1           | checkpoint kinase 1 homolog (S. pombe)          | -1.1  | 0.78 | -1.03  | 0.8052 | -1.04 | 0.7685 | -1.09  | 0.5164 | -1.68 | 0.0613 |
| 103065_at   | 1448568_a_at | Slc20a1         | solute carrier family 20, member 1              | 2.77  | 0.01 | 1.1    | 0.4013 | 2.23  | 0      | 1.54   | 0.0014 | -1.08 | 0.8187 |
| 103066_at   | 1450484_a_at | Tyki            | thymidylate kinase family LPS-inducible mer     | -2.2  | 0.25 | -1.06  | 0.8603 | -1.34 | 0.2572 | 1.05   | 0.8568 | 1.81  | 0.0729 |
| 103067_at   | 1423137_at   | Rala            | v-ral simian leukemia viral oncogene homolc     | 1.81  | 0    | 1.13   | 0.2293 | 1.2   | 0.0624 | 1.1    | 0.2272 | 1.23  | 0.5331 |
| 103069_at   | 1428639_at   | Lin9            | lin-9 homolog (C. elegans)                      | 1.13  | 0.59 | 1.16   | 0.3464 | 1.43  | 0.0042 | 1.18   | 0.1976 | 1.45  | 0.3676 |
| 103070_at   | 1416985_at   | ---             | ---                                             | 1.39  | 0.57 | 1.62   | 0.2598 | -1.34 | 0.1667 | 2.72   | 0.1868 | -1.34 | 0.6478 |
| 103071_at   | 1452241_at   | Topbp1          | topoisomerase (DNA) II beta binding protein     | 1.37  | 0.25 | 1.4    | 0.1554 | -1.02 | 0.947  | 1.17   | 0.3168 | 1.22  | 0.7275 |
| 103072_at   | 1448453_at   | Hsd3b1          | hydroxysteroid dehydrogenase-1, delta<5>->      | -1.16 | 0.69 | 1.19   | 0.2122 | 1.26  | 0.2367 | 1.16   | 0.4937 | -1.01 | 0.9702 |
| 103074_f_at | 1438250_s_at | Taf9            | TAF9 RNA polymerase II, TATA box binding        | 1.51  | 0.02 | 1.2    | 0.114  | 1.11  | 0.4279 | 1.37   | 0.0023 | -1.06 | 0.7655 |
| 103075_at   | 1417945_at   | Pou5f1          | POU domain, class 5, transcription factor 1     | -2.3  | 0.15 | -1.62  | 0.1402 | -1.94 | 0.049  | -1.31  | 0.3095 | 1.43  | 0.1365 |
| 103076_at   | 1432270_a_at | Chmp5           | chromatin modifying protein 5                   | -1.03 | 0.94 | 1.16   | 0.1082 | 1.12  | 0.4069 | 1.13   | 0.2484 | 1.01  | 0.985  |
| 103078_at   | 1424726_at   | BC014685        | cDNA sequence BC014685                          | -1.27 | 0.22 | -1.05  | 0.5964 | -1.22 | 0.1099 | -1.05  | 0.6013 | -1.36 | 0.1099 |
| 103079_at   | 1426525_at   | Arid2           | AT rich interactive domain 2 (Arid-rfx like)    | 1.12  | 0.09 | 1.16   | 0.0191 | -1.01 | 0.7422 | 1.08   | 0.192  | 1.16  | 0.4168 |
| 103080_at   | 1418131_at   | Samhd1          | SAM domain and HD domain, 1                     | 1.12  | 0.36 | 1.11   | 0.7851 | -1.42 | 0.0058 | 1.09   | 0.7729 | 1.2   | 0.1455 |
| 103081_at   | 1434824_at   | Baz1b           | bromodomain adjacent to zinc finger domair      | 1.2   | 0.45 | 1.22   | 0.0149 | 1.49  | 0.0017 | 1.19   | 0.0064 | 1.49  | 0.0562 |
| 103084_at   | 1460318_at   | Csrp3           | cysteine and glycine-rich protein 3             | -2.27 | 0.49 | -16.46 | 0      | -1.73 | 0.001  | -20.32 | 0      | -8.84 | 0.0009 |
| 103085_at   | 1418172_at   | Hebp1           | heme binding protein 1                          | 1.23  | 0.35 | 1.14   | 0.1113 | -1.11 | 0.34   | 1.03   | 0.8038 | 1.36  | 0.1869 |
| 103087_at   | 1427345_a_at | Sult1a1         | sulfotransferase family 1A, phenol-preferring   | 2.08  | 0.03 | -1.07  | 0.1984 | -1.05 | 0.4706 | 1.06   | 0.4198 | 1.93  | 0.003  |
| 103088_at   | 1417795_at   | Chl1            | cell adhesion molecule with homology to L1      | 1.47  | 0.18 | 1.24   | 0.0437 | 1.3   | 0.1297 | 1.04   | 0.6456 | -1.1  | 0.7725 |
| 103089_at   | 1427301_at   | Cd48            | CD48 antigen                                    | 1.47  | 0.11 | 1.69   | 0.1772 | 1.06  | 0.7504 | 2.18   | 0.1475 | 2.48  | 0.0693 |
| 103090_at   | 1448337_at   | 2410003P15Rik   | RIKEN cDNA 2410003P15 gene                      | 1.35  | 0.33 | 1.02   | 0.8826 | -1.05 | 0.7955 | 1.05   | 0.762  | -1.02 | 0.9464 |
| 103091_at   | 1417856_at   | Relb            | avian reticuloendotheliosis viral (v-rel) onco  | 1.09  | 0.77 | 1.16   | 0.2765 | 1.03  | 0.7645 | 1.49   | 0.0187 | -1.08 | 0.6709 |
| 103092_at   | 1455012_s_at | Trim37          | tripartite motif protein 37                     | 1.34  | 0.42 | 1.15   | 0.1807 | 1.08  | 0.4585 | 1.42   | 0.0069 | 1.59  | 0.2853 |
| 103094_at   | 1449509_at   | Serf1           | small EDRK-rich factor 1                        | 1.99  | 0.1  | -1.21  | 0.4607 | -1.15 | 0.5682 | -1.34  | 0.2529 | 1.52  | 0.2592 |
| 103095_at   | 1448227_at   | Grb7            | growth factor receptor bound protein 7          | -1.15 | 0.64 | 1.07   | 0.5982 | -1.02 | 0.8668 | 1.04   | 0.7353 | 1.16  | 0.1904 |
| 103096_at   | 1419281_a_at | Zfp259          | zinc finger protein 259                         | 2.97  | 0.03 | 1.07   | 0.5412 | 1.21  | 0.0957 | 1.31   | 0.0703 | 2.31  | 0.0308 |
| 103097_at   | 1452941_at   | 0610038F07Rik   | RIKEN cDNA 0610038F07 gene                      | 1.35  | 0.33 | 1.12   | 0.0553 | -1.08 | 0.3667 | 1.07   | 0.2315 | -1.1  | 0.4123 |
| 103098_at   | 1425656_a_at | Baiap2          | brain-specific angiogenesis inhibitor 1-assoc   | -1.63 | 0.02 | -1.11  | 0.0758 | -1.08 | 0.5002 | -1.38  | 0.0005 | 1.1   | 0.5747 |
| 103100_at   | 1417818_at   | Wwtr1           | WW domain containing transcription regulat      | 1.26  | 0.06 | 1.34   | 0.0008 | 1.16  | 0.2911 | 1.7    | 0.0004 | -1.33 | 0.0352 |
| 103101_at   | 1423616_at   | Tarbp2          | TAR (HIV) RNA binding protein 2                 | -1.05 | 0.44 | 1.39   | 0.2027 | 1.87  | 0.0181 | 1.22   | 0.4113 | 1.27  | 0.2989 |
| 103132_at   | 1446790_at   | C78948          | expressed sequence C78948                       | -1.38 | 0.22 | -1.26  | 0.2588 | -1.34 | 0.1842 | -1.05  | 0.7786 | 2.11  | 0.0094 |
| 103198_at   | 1455239_at   | 6330512M04Rik   | RIKEN cDNA 6330512M04 gene                      | -1.31 | 0.23 | 1.06   | 0.486  | 1.09  | 0.2218 | 1.1    | 0.1502 | -1.06 | 0.8532 |
| 103199_at   | 1419412_at   | Xcl1            | chemokine (C motif) ligand 1                    | -3.55 | 0    | 1.32   | 0.3646 | 1.03  | 0.9228 | 1.17   | 0.6112 | 1.26  | 0.3859 |
| 103200_at   | 1460555_at   | 6330500D04Rik   | RIKEN cDNA 6330500D04 gene                      | 1.24  | 0.38 | -3.11  | 0      | -1.71 | 0.0012 | -2.47  | 0      | -1.1  | 0.8263 |
| 103202_at   | 1418392_a_at | Gbp4            | guanylate nucleotide binding protein 4          | 1.08  | 0.72 | 2.62   | 0.3114 | -1.46 | 0.181  | 2.58   | 0.2248 | -1.12 | 0.6925 |
| 103204_r_at | 1436186_at   | 4432406C08Rik   | RIKEN cDNA 4432406C08 gene                      | -3.05 | 0.01 | -1.37  | 0.0789 | -1.38 | 0.1276 | -1.25  | 0.2107 | -1.43 | 0.2413 |
| 103205_at   | 1420635_a_at | Tcirg1          | T-cell, immune regulator 1                      | -1.24 | 0.14 | -1.01  | 0.9359 | -1.12 | 0.2334 | 1.07   | 0.6897 | 1.11  | 0.2766 |
| 103207_at   | 1419397_at   | Pola1           | polymerase (DNA directed), alpha 1              | -1.11 | 0.75 | -1.28  | 0.0421 | -1.12 | 0.3192 | -1.11  | 0.3374 | 1.07  | 0.6861 |
| 103210_at   | 1449360_at   | Csf2rb2         | colony stimulating factor 2 receptor, beta 2, I | -1.28 | 0.59 | 1.01   | 0.9791 | -1.36 | 0.0239 | 1.22   | 0.6268 | -1.09 | 0.5416 |

|             |              |                   |                                                |       |      |       |        |       |        |       |        |       |        |
|-------------|--------------|-------------------|------------------------------------------------|-------|------|-------|--------|-------|--------|-------|--------|-------|--------|
| 103211_at   | 1434517_at   | Wdfy2             | WD repeat and FYVE domain containing 2         | 1.32  | 0.11 | 1.12  | 0.4138 | 1.1   | 0.3874 | 1.03  | 0.7949 | -1.48 | 0.2483 |
| 103212_at   | 1451306_at   | BC006933          | cDNA sequence BC006933                         | 3.73  | 0    | 1.11  | 0.6241 | -1.27 | 0.2985 | 1.09  | 0.7109 | 1.25  | 0.5672 |
| 103213_at   | 1418602_at   | Cdh15             | cadherin 15                                    | 1.86  | 0.03 | -1.36 | 0.2852 | -1.28 | 0.4093 | -1.43 | 0.3769 | 1.47  | 0.0822 |
| 103215_g_at | 1429888_a_at | Hspb2             | heat shock protein 2                           | -1.04 | 0.74 | -1.27 | 0.0346 | -1.2  | 0.0738 | -1.35 | 0.0339 | -1.26 | 0.3278 |
| 103216_f_at | 1454690_at   | Ikkg              | inhibitor of kappaB kinase gamma               | 1.02  | 0.94 | 1.12  | 0.1239 | 1.16  | 0.2154 | 1.06  | 0.4584 | -2.15 | 0.0074 |
| 103217_at   | 1425687_at   | Cflar             | CASP8 and FADD-like apoptosis regulator        | -1.23 | 0.55 | 1.18  | 0.3958 | -1.77 | 0.0051 | -1.44 | 0.0298 | -1.39 | 0.1654 |
| 103218_at   | 1451227_a_at | Slc10a3           | solute carrier family 10 (sodium/bile acid cot | 1.46  | 0.02 | -1.18 | 0.2527 | -1.04 | 0.7659 | -1.11 | 0.4376 | 1.29  | 0.0598 |
| 103219_at   | 1419832_s_at | Acpp              | acid phosphatase, prostate                     | -1.07 | 0.35 | 1.19  | 0.102  | -1.09 | 0.4779 | 1.2   | 0.0918 | 1.3   | 0.502  |
| 103220_at   | 1422554_at   | Ndnl2             | necdin-like 2                                  | 1.05  | 0.8  | 1.03  | 0.6205 | -1.01 | 0.9547 | -1.06 | 0.3813 | 1.14  | 0.4158 |
| 103222_at   | 1422824_s_at | Eps8              | epidermal growth factor receptor pathway su    | -1.23 | 0.38 | 1.43  | 0.0352 | 1.25  | 0.4552 | 1.37  | 0.2489 | 3.66  | 0.0106 |
| 103223_at   | 1452878_at   | Prkce             | protein kinase C, epsilon                      | 1.09  | 0.52 | 1.22  | 0.2361 | 1.1   | 0.5839 | 1.1   | 0.5834 | 1.49  | 0.1533 |
| 103224_at   | 1417529_at   | Rab33a            | RAB33A, member of RAS oncogene family          | -1.41 | 0.46 | -1.19 | 0.3701 | 1.09  | 0.7073 | 1.34  | 0.268  | 1.37  | 0.3948 |
| 103225_at   | 1429173_at   | Dnase111          | deoxyribonuclease 1-like 1                     | -1.01 | 0.9  | 1.05  | 0.5355 | 1.07  | 0.4325 | 1.08  | 0.4386 | -1.09 | 0.8267 |
| 103226_at   | 1450430_at   | Mrc1              | mannose receptor, C type 1                     | 1.72  | 0.07 | 1     | 0.9846 | 1.25  | 0.3129 | -1.03 | 0.8695 | 1.06  | 0.7099 |
| 103227_at   | 1427961_s_at | AI788959          | expressed sequence AI788959                    | -1.13 | 0.37 | 1.03  | 0.5389 | -1.01 | 0.8833 | 1.06  | 0.1142 | -1.11 | 0.4879 |
| 103228_at   | 1427025_at   | Mtmr7             | myotubularin related protein 7                 | 1.21  | 0.67 | 1.24  | 0.1826 | -1.23 | 0.0998 | 1.25  | 0.0411 | 1.35  | 0.1558 |
| 103229_at   | 1418594_a_at | Ncoa1             | nuclear receptor coactivator 1                 | 1.15  | 0.65 | 1.08  | 0.4731 | 1.22  | 0.0964 | 1.1   | 0.3867 | 1     | 0.9873 |
| 103231_at   | 1429319_at   | Rhoh              | ras homolog gene family, member H              | -1.36 | 0.27 | -1.08 | 0.6126 | 1.06  | 0.6781 | -1.02 | 0.8951 | 1.66  | 0.3303 |
| 103232_at   | 1454732_at   | Bpy2ip1           | BPY2 interacting protein 1                     | -1.26 | 0.32 | -1.69 | 0.105  | -1.67 | 0.1088 | -1.82 | 0.0752 | -1.6  | 0.0588 |
| 103233_at   | 1419191_at   | Hipk3             | homeodomain interacting protein kinase 3       | 1.28  | 0.64 | 1.65  | 0.0065 | 1.37  | 0.112  | 1.31  | 0.0866 | -1.34 | 0.3367 |
| 103234_at   | 1424847_at   | Nefh              | neurofilament, heavy polypeptide               | -2.13 | 0.03 | -1.29 | 0.2548 | 1.01  | 0.9805 | -1.17 | 0.4421 | 2.18  | 0.1957 |
| 103235_at   | 1419127_at   | Npy               | neuropeptide Y                                 | -2.37 | 0.28 | -1.26 | 0.1673 | -1.55 | 0.0212 | 1     | 0.979  | 1.53  | 0.2524 |
| 103236_at   | 1422647_at   | Ring1             | ring finger protein 1                          | -1.18 | 0.45 | -1.05 | 0.7633 | -1.08 | 0.6516 | -1.32 | 0.1438 | 1.14  | 0.6999 |
| 103237_at   | 1448878_at   | Mxd3              | Max dimerization protein 3                     | -1.6  | 0.48 | -1.01 | 0.9675 | 1.09  | 0.749  | 1.01  | 0.9744 | 1.04  | 0.6834 |
| 103238_at   | 1450782_at   | Wnt4              | wingless-related MMTV integration site 4       | 1.14  | 0.43 | -1.05 | 0.5203 | 1.02  | 0.8033 | -1.19 | 0.0191 | 1.14  | 0.4434 |
| 103239_at   | 1422074_at   | Cdx2              | caudal type homeo box 2                        | -1.02 | 0.88 | 1.7   | 0.0587 | 1.57  | 0.2484 | 1.06  | 0.8062 | 2.11  | 0.0946 |
| 103240_f_at | 1422411_s_at | Ear1 /// Ear2 /// | eosinophil-associated, ribonuclease A family   | 1.36  | 0.37 | 1.38  | 0.2521 | -1.07 | 0.5423 | 1.53  | 0.2385 | 1.09  | 0.6875 |
| 103241_at   | 1455462_at   | Adcy2             | adenylate cyclase 2                            | 1.12  | 0.62 | -1.1  | 0.6089 | 1.02  | 0.9089 | 1.03  | 0.8562 | 1.32  | 0.3313 |
| 103242_at   | 1460712_s_at | Ap1g1             | adaptor protein complex AP-1, gamma 1 sub      | -1.33 | 0.24 | -1.13 | 0.201  | 1.01  | 0.877  | -1.12 | 0.1233 | -1.07 | 0.5227 |
| 103243_at   | 1425272_at   | Emp2              | epithelial membrane protein 2                  | -1.12 | 0.82 | -1.03 | 0.7788 | -1.07 | 0.6269 | -1.17 | 0.2958 | 1.37  | 0.1663 |
| 103244_at   | 1418796_at   | Clec11a           | C-type lectin domain family 11, member a       | 1.34  | 0.47 | 1.06  | 0.5851 | -1    | 0.9671 | 1.14  | 0.2533 | -1.58 | 0.0797 |
| 103245_at   | 1424479_at   | Cst8              | cystatin 8 (cystatin-related epididymal sperr  | -1.85 | 0.12 | -1.34 | 0.294  | 1.22  | 0.4478 | -1.27 | 0.3637 | 2.39  | 0.0308 |
| 103247_at   | 1419077_at   | Mpp3              | membrane protein, palmitoylated 3 (MAGUK       | -1.16 | 0.63 | 1.16  | 0.4307 | -1.09 | 0.6426 | 1.22  | 0.3092 | 1.88  | 0.1307 |
| 103248_at   | 1449429_at   | Fkbp1b            | FK506 binding protein 1b                       | -1.08 | 0.87 | -1.11 | 0.4714 | -1.01 | 0.9667 | 1.03  | 0.8599 | 1.5   | 0.0441 |
| 103249_at   | 1417304_at   | Chrd              | chordin                                        | -1.67 | 0.38 | 1.25  | 0.1651 | 1.2   | 0.1719 | 1.14  | 0.2349 | 1.38  | 0.2595 |
| 103250_at   | 1417903_at   | Dfna5h            | deafness, autosomal dominant 5 homolog (f      | 1.23  | 0.77 | 1.21  | 0.4285 | -1.41 | 0.2407 | -1.3  | 0.3848 | 1.24  | 0.7015 |
| 103251_at   | 1455073_at   | Cdadc1            | cytidine and dCMP deaminase domain cont        | 1.35  | 0.24 | -1.04 | 0.4481 | -1.1  | 0.0924 | -1.12 | 0.0304 | -1.05 | 0.6505 |
| 103253_at   | 1449172_a_at | Lin7b             | lin 7 homolog b (C. elegans)                   | -1.64 | 0.18 | 1.03  | 0.6799 | 1.12  | 0.2218 | 1.1   | 0.4091 | -1.25 | 0.5438 |
| 103254_at   | 1428346_at   | MGI:1923551       | FLN29 gene product                             | -1.08 | 0.63 | 1.37  | 0.1462 | 1.02  | 0.8025 | 1.54  | 0.1418 | -1.16 | 0.2935 |
| 103255_at   | 1448861_at   | Traf5             | Tnf receptor-associated factor 5               | 2.43  | 0.01 | 1.35  | 0.1176 | 1     | 0.9865 | 1.47  | 0.0198 | 1.3   | 0.4225 |
| 103256_at   | 1418990_at   | Ms4a4d            | membrane-spanning 4-domains, subfamily 4       | 1.98  | 0.09 | 1.07  | 0.7607 | 1.24  | 0.1651 | -1.09 | 0.6323 | 2.11  | 0.0122 |
| 103257_at   | 1434553_at   | 4930577M16Rik     | RIKEN cDNA 4930577M16 gene                     | -1.04 | 0.84 | 1.06  | 0.3299 | 1.07  | 0.3252 | 1.1   | 0.0919 | -1.27 | 0.0567 |
| 103258_at   | 1449328_at   | Ly75              | lymphocyte antigen 75                          | 1.09  | 0.55 | -1.21 | 0.4351 | -1.36 | 0.0435 | -1.05 | 0.8628 | -1.12 | 0.7297 |
| 103259_at   | 1417679_at   | Gfi1              | growth factor independent 1                    | -1.01 | 0.99 | 1.01  | 0.9768 | -1.09 | 0.7269 | 1.01  | 0.9709 | 1.18  | 0.679  |
| 103260_at   | 1430291_at   | 1110060D06Rik     | RIKEN cDNA 1110060D06 gene                     | 1.4   | 0.27 | 1.03  | 0.5504 | 1.14  | 0.0023 | 1.14  | 0.0354 | 1.06  | 0.6765 |
| 103261_at   | 1418109_at   | Gsp2              | G1 to phase transition 2                       | 1.26  | 0.7  | -1.16 | 0.2677 | -1.17 | 0.4376 | -1.01 | 0.9193 | -1.32 | 0.5246 |
| 103262_at   | 1421298_a_at | Hipk1             | homeodomain interacting protein kinase 1       | 1.15  | 0.81 | 1.56  | 0.1343 | -1.36 | 0.2949 | -1.05 | 0.8695 | 1.16  | 0.7168 |
| 103263_at   | 1418850_at   | Epc1              | enhancer of polycomb homolog 1 (Drosophili     | 1.09  | 0.5  | 1.1   | 0.2071 | 1.18  | 0.0288 | 1.07  | 0.3171 | 1.15  | 0.4426 |
| 103264_at   | 1421879_at   | Mtmr1             | myotubularin related protein 1                 | -1.16 | 0.75 | -1.05 | 0.6444 | -1.02 | 0.8837 | 1.17  | 0.1526 | 1.1   | 0.5227 |
| 103266_at   | 1420407_at   | Ltb4r1            | leukotriene B4 receptor 1                      | 1.38  | 0.63 | 1.22  | 0.1483 | 1.27  | 0.1849 | 1.22  | 0.1161 | -1.07 | 0.6327 |
| 103268_r_at | 1427536_at   | Zfp125            | zinc finger protein 125                        | -2.98 | 0.02 | -1.3  | 0.2395 | -1.49 | 0.0896 | -1.14 | 0.7284 | 1.44  | 0.4233 |
| 103270_at   | 1416969_at   | Gtse1             | G two S phase expressed protein 1              | 1.34  | 0.39 | -1.35 | 0.1506 | -1.52 | 0.0931 | -1.27 | 0.1489 | 1.18  | 0.4675 |
| 103271_at   | 1451022_at   | Lrp6              | low density lipoprotein receptor-related prote | -1.14 | 0.84 | -1.06 | 0.6154 | -1.21 | 0.1214 | -1.14 | 0.301  | -1.71 | 0.2249 |

|             |              |               |                                                 |       |      |       |        |       |        |       |        |       |        |
|-------------|--------------|---------------|-------------------------------------------------|-------|------|-------|--------|-------|--------|-------|--------|-------|--------|
| 103273_s_at | 1455765_a_at | Abcc8         | ATP-binding cassette, sub-family C (CFTR/M      | -1.48 | 0.24 | 1.01  | 0.9809 | -1.03 | 0.9222 | 1     | 0.9921 | -1.06 | 0.8681 |
| 103275_at   | 1460650_at   | Atp6v0a1      | ATPase, H+ transporting, lysosomal V0 sub       | -1.44 | 0.11 | -1.33 | 0.0135 | -1.33 | 0.0552 | -1.58 | 0.0012 | -1.05 | 0.7886 |
| 103276_at   | 1417435_at   | Large         | like-glycosyltransferase                        | -1.18 | 0.25 | 1.11  | 0.4985 | -1.01 | 0.9632 | 1.21  | 0.2411 | 1.67  | 0.048  |
| 103277_s_at | 1425585_at   | Tnrc11        | trinucleotide repeat containing 11 (THR-ass     | 1.04  | 0.85 | 1.02  | 0.723  | 1.1   | 0.3487 | 1.03  | 0.6618 | 1.11  | 0.3432 |
| 103278_at   | 1422760_at   | Pad14         | peptidyl arginine deiminase, type IV            | -2.71 | 0.07 | -1.26 | 0.1482 | 1.21  | 0.4834 | -1.09 | 0.7568 | -1.71 | 0.4827 |
| 103279_at   | 1449393_at   | Sh2d1a        | SH2 domain protein 1A                           | -1.63 | 0.1  | 1.01  | 0.9439 | -1.14 | 0.5008 | 1.34  | 0.0796 | 1.87  | 0.2925 |
| 103281_at   | 1420906_at   | Cd2ap         | CD2-associated protein                          | 1.95  | 0.13 | 1.05  | 0.6975 | -1.06 | 0.6948 | 1.24  | 0.2034 | -1.36 | 0.4361 |
| 103282_at   | 1417804_at   | LOC381240     | similar to calcium and DAG-regulated guanir     | -1.11 | 0.65 | -1.05 | 0.6389 | -1.09 | 0.2287 | -1.18 | 0.0171 | 1.54  | 0.1268 |
| 103283_at   | 1419555_at   | Elf5          | E74-like factor 5                               | -2.28 | 0.37 | -1.11 | 0.7505 | 1.54  | 0.2065 | 1.07  | 0.8194 | -1.08 | 0.8697 |
| 103284_at   | 1449309_at   | Cyp8b1        | cytochrome P450, family 8, subfamily b, poly    | -1.12 | 0.42 | -1.32 | 0.0423 | -1.19 | 0.1483 | -1.16 | 0.24   | -1.27 | 0.213  |
| 103285_at   | 1449490_at   | Mbd4          | methyl-CpG binding domain protein 4             | 1.46  | 0.31 | 1.05  | 0.5675 | -1.08 | 0.4553 | -1.01 | 0.9177 | 1.28  | 0.5811 |
| 103286_at   | 1416975_at   | Stam2         | signal transducing adaptor molecule (SH3 d      | 1.03  | 0.92 | -1.01 | 0.9298 | 1.23  | 0.0456 | 1     | 0.9546 | 1.68  | 0.0117 |
| 103288_at   | 1449089_at   | Nrip1         | nuclear receptor interacting protein 1          | -1.01 | 0.96 | 1.11  | 0.672  | -2.02 | 0.0063 | -1.77 | 0.0434 | 1.23  | 0.4144 |
| 103289_at   | 1419017_at   | Corin         | corin                                           | -1.56 | 0.27 | 1.07  | 0.8518 | 1.6   | 0.2436 | 1.55  | 0.1654 | 1.45  | 0.1426 |
| 103291_at   | 1422325_at   | Magea5        | melanoma antigen, family A, 5                   | 1.22  | 0.33 | -1.02 | 0.9417 | 1.18  | 0.5348 | 1.11  | 0.6529 | -1.2  | 0.6468 |
| 103292_at   | 1421984_at   | Stc1          | stanniocalcin 1                                 | 1.13  | 0.8  | 1.99  | 0.015  | 1.29  | 0.349  | 1.71  | 0.0249 | -1.32 | 0.6794 |
| 103293_at   | 1448256_at   | Gosr1         | golgi SNAP receptor complex member 1            | -1    | 0.99 | -1.01 | 0.9142 | -1.1  | 0.4293 | -1.13 | 0.168  | 1.37  | 0.1499 |
| 103294_at   | 1420940_x_at | Rgs5          | regulator of G-protein signaling 5              | 1.18  | 0.35 | -1.01 | 0.9021 | -1.36 | 0.137  | -1.23 | 0.2553 | 1.2   | 0.6851 |
| 103295_at   | 1455066_s_at | 9130229H14Rik | RIKEN cDNA 9130229H14 gene                      | -1.42 | 0.29 | 1.36  | 0.035  | 1.16  | 0.3091 | 1.53  | 0.0042 | 2.29  | 0.0056 |
| 103296_at   | 1449285_at   | Cst9          | cystatin 9                                      | -7.34 | 0.08 | -1.03 | 0.9282 | 1.1   | 0.7157 | -1.18 | 0.5497 | 1.32  | 0.3443 |
| 103297_at   | 1427213_at   | Pfkfb1        | 6-phosphofructo-2-kinase/fructose-2,6-biphc     | 2.31  | 0    | -1.49 | 0.0322 | 1.01  | 0.9595 | 1.12  | 0.4055 | -1.55 | 0.2507 |
| 103298_at   | 1448664_a_at | Apeg1         | aortic preferentially expressed gene 1          | -1.49 | 0.65 | 1.24  | 0.4474 | -1.19 | 0.5884 | 1.19  | 0.5501 | 1.13  | 0.6362 |
| 103299_at   | 1433678_at   | Al132321      | expressed sequence Al132321                     | 1.75  | 0.15 | 1.24  | 0.5141 | -1.25 | 0.1162 | 1.62  | 0.2707 | 1.06  | 0.8843 |
| 103300_at   | 1435006_s_at | Abcb7         | ATP-binding cassette, sub-family B (MDR/T,      | -1.3  | 0.31 | 1.01  | 0.7794 | 1.17  | 0.0523 | 1.17  | 0.0059 | -1.38 | 0.0198 |
| 103302_r_at | 1435192_at   | ---           | Transcribed locus                               | -1.84 | 0.05 | -1.15 | 0.2935 | -1.11 | 0.4363 | -1.14 | 0.3731 | -1.07 | 0.7306 |
| 103303_at   | 1448026_at   | Chd7          | Chromodomain helicase DNA binding protei        | 1.08  | 0.36 | 1.42  | 0.0048 | 1.34  | 0.029  | 1.67  | 0.0001 | 1.38  | 0.1441 |
| 103305_at   | 1427387_a_at | Irgb4         | integrin beta 4                                 | 1.99  | 0.29 | -1.03 | 0.6953 | -1.02 | 0.8643 | -1.01 | 0.8796 | 1.41  | 0.0797 |
| 103306_at   | 1451594_s_at | Serpinb6c     | serine (or cysteine) proteinase inhibitor, clac | -1.15 | 0.72 | 1.06  | 0.8443 | -1    | 0.9902 | 1.01  | 0.9805 | 1.09  | 0.8956 |
| 103308_at   | 1434767_at   | C79407        | expressed sequence C79407                       | -2.03 | 0.16 | -1.05 | 0.8435 | 1.44  | 0.141  | 1.08  | 0.7309 | 2.06  | 0.2188 |
| 103309_at   | 1417592_at   | Frap1         | FK506 binding protein 12-rapamycin associ       | 1.86  | 0.23 | 1.05  | 0.3815 | 1.53  | 0.0003 | 1.22  | 0.0354 | -1.23 | 0.3516 |
| 103310_at   | 1427142_s_at | Jarid1b       | jumonji, AT rich interactive domain 1B (Rbp2    | -1.01 | 0.93 | -1.87 | 0.0001 | -1.63 | 0.0054 | -1.22 | 0.1203 | 1.1   | 0.7322 |
| 103311_at   | 1425391_a_at | Osbpl5        | oxysterol binding protein-like 5                | 1.57  | 0.27 | 1.69  | 0.0079 | 1.47  | 0.018  | 1.79  | 0.0005 | 2.35  | 0.0025 |
| 103313_r_at | 1434941_s_at | 2610101J03Rik | RIKEN cDNA 2610101J03 gene                      | -1.31 | 0.63 | -1.1  | 0.7043 | 1.3   | 0.3366 | 1.07  | 0.6801 | -1.08 | 0.7906 |
| 103314_at   | 1451474_a_at | Parp8         | poly (ADP-ribose) polymerase family, memb       | 2.53  | 0.16 | 2.42  | 0.0315 | 2.36  | 0.0829 | 4.02  | 0.0119 | 1.27  | 0.493  |
| 103315_at   | 1434898_at   | Tnrc6a        | trinucleotide repeat containing 6a              | 1.57  | 0.06 | -1.1  | 0.1591 | -1.05 | 0.3727 | -1.01 | 0.8704 | 1.31  | 0.1396 |
| 103316_at   | 1435530_at   | Camsap1       | calmodulin regulated spectrin-associated pro    | 6.46  | 0.02 | 1.84  | 0.0896 | 2.47  | 0.0035 | 2.55  | 0.0001 | -1.35 | 0.5533 |
| 103318_at   | 1436232_a_at | Gabpb1        | GA repeat binding protein, beta 1               | -1.05 | 0.86 | -1.14 | 0.0657 | 1.06  | 0.6279 | -1.12 | 0.13   | -1.13 | 0.3299 |
| 103319_at   | 1436559_a_at | Psmc10        | proteasome (prosome, macropain) 26S sub         | 2.78  | 0.04 | 1.43  | 0.008  | 1.14  | 0.4472 | 1.61  | 0.0003 | -1.06 | 0.8638 |
| 103321_at   | 1455184_at   | B230364F10    | hypothetical protein B230364F10                 | 1.66  | 0.09 | 1.15  | 0.0758 | 1.14  | 0.205  | 1.19  | 0.09   | -1.76 | 0.0112 |
| 103322_at   | 1418337_at   | Rpia          | ribose 5-phosphate isomerase A                  | -1.16 | 0.26 | -1.11 | 0.0152 | 1.02  | 0.5856 | -1.17 | 0.0036 | 1.04  | 0.6324 |
| 103326_at   | 1434330_at   | Lrrc35        | leucine rich repeat containing 35               | -1.05 | 0.79 | -1.24 | 0.0011 | 1.3   | 0.0017 | -1.04 | 0.4726 | -2.66 | 0.0075 |
| 103327_at   | 1432331_a_at | Prrx2         | paired related homeobox 2                       | -1.69 | 0.41 | -1.01 | 0.9177 | 1.09  | 0.4367 | -1.02 | 0.8762 | 1.02  | 0.9632 |
| 103328_at   | 1421640_a_at | Tank          | TRAF family member-associated Nf-kappa E        | -1.42 | 0.19 | 1.01  | 0.9538 | -1.04 | 0.6966 | 1.12  | 0.2451 | -1.77 | 0.0134 |
| 103329_at   | 1421125_at   | Strbp         | spermatid perinuclear RNA binding protein       | -1.04 | 0.94 | 1.91  | 0.0011 | 1.24  | 0.5185 | 1.28  | 0.516  | 2.14  | 0.0739 |
| 103330_at   | 1452061_s_at | Strbp         | spermatid perinuclear RNA binding protein       | 1.69  | 0.08 | 1.35  | 0.0004 | 1.27  | 0.0128 | 1.63  | 0      | 1.47  | 0.0029 |
| 103331_at   | 1451085_at   | C030006K11Rik | RIKEN cDNA C030006K11 gene                      | 1.18  | 0.53 | 1.01  | 0.93   | -1.12 | 0.0688 | -1.11 | 0.3057 | 1.06  | 0.8829 |
| 103332_at   | 1426782_at   | Gpr125        | G protein-coupled receptor 125                  | -1.15 | 0.7  | -1.24 | 0.1726 | -1.01 | 0.9524 | -1.58 | 0.0024 | -1.26 | 0.2736 |
| 103333_at   | 1417880_at   | G6pc          | glucose-6-phosphatase, catalytic                | -2.94 | 0.04 | -1.45 | 0.168  | -1.2  | 0.4457 | -1.35 | 0.2403 | 1.1   | 0.7714 |
| 103334_at   | 1418249_at   | Crcp          | calcitonin gene-related peptide-receptor corr   | 1.26  | 0.33 | 1.23  | 0.0465 | 1.1   | 0.3848 | 1.18  | 0.0266 | 1.04  | 0.7954 |
| 103335_at   | 1421217_a_at | Lgals9        | lectin, galactose binding, soluble 9            | -1.28 | 0.29 | -1.24 | 0.0025 | 1.05  | 0.4815 | -1.32 | 0      | -2.18 | 0.0002 |
| 103338_at   | 1428931_a_at | Parp6         | poly (ADP-ribose) polymerase family, memb       | 1.64  | 0.11 | 1.04  | 0.6788 | 1     | 0.9898 | -1.03 | 0.8002 | 1.03  | 0.8413 |
| 103340_at   | 1417049_at   | Rhcd          | Rhesus blood group CE and D                     | -1.34 | 0.73 | 1.13  | 0.6683 | 1.38  | 0.2923 | -1.07 | 0.8418 | -2.56 | 0.0518 |
| 103341_at   | 1416563_at   | Ctps          | cytidine 5'-triphosphate synthase               | -1.09 | 0.64 | -1.14 | 0.1485 | -1.03 | 0.5706 | -1.02 | 0.7526 | -1.3  | 0.099  |

|             |              |                 |                                                  |       |      |       |        |       |        |       |        |       |        |
|-------------|--------------|-----------------|--------------------------------------------------|-------|------|-------|--------|-------|--------|-------|--------|-------|--------|
| 103342_at   | 1448653_at   | Eed             | embryonic ectoderm development                   | 1.56  | 0.14 | 1.26  | 0.0053 | 1.49  | 0.0173 | 1.3   | 0.0192 | -1.14 | 0.2321 |
| 103343_at   | 1453768_a_at | 5430432M24Rik   | RIKEN cDNA 5430432M24 gene                       | 1.13  | 0.59 | 1.09  | 0.6007 | 1     | 0.9987 | 1.03  | 0.8783 | 1.54  | 0.057  |
| 103344_at   | 1420501_at   | Dnajc1          | DnaJ (Hsp40) homolog, subfamily C, memb          | 1.27  | 0.25 | 1.11  | 0.2382 | -1.27 | 0.0191 | -1.02 | 0.8363 | 1.28  | 0.0315 |
| 103345_at   | 1427889_at   | Spna2           | spectrin alpha 2                                 | 1.71  | 0.09 | 1.28  | 0.042  | 1.07  | 0.5335 | 1.39  | 0.0001 | 1.64  | 0.0246 |
| 103346_at   | 1417743_at   | ---             | ---                                              | 1.09  | 0.61 | 1.14  | 0.0462 | 1.01  | 0.9129 | 1.11  | 0.1534 | 1.18  | 0.4065 |
| 103347_at   | 1420326_s_at | Tce4            | T-complex expressed gene 4                       | -1.04 | 0.92 | -1.1  | 0.3281 | 1.03  | 0.7582 | -1.1  | 0.3308 | 1.64  | 0.1068 |
| 103348_at   | 1460350_at   | ---             | ---                                              | -1.37 | 0.03 | 1.11  | 0.122  | 1.08  | 0.2708 | 1.02  | 0.7634 | -1.24 | 0.0409 |
| 103352_at   | 1448549_a_at | Dpagt1          | dolichyl-phosphate (UDP-N-acetylglucosami        | -1.01 | 0.92 | -1.08 | 0.1816 | -1.02 | 0.839  | -1.09 | 0.2032 | -1.01 | 0.9451 |
| 103353_f_at | 1416194_at   | Cyp4b1          | cytochrome P450, family 4, subfamily b, pol      | 1.11  | 0.52 | 1.19  | 0.1677 | 1.22  | 0.0058 | 1.21  | 0.1434 | 1.38  | 0.0205 |
| 103354_at   | 1417737_at   | Mrps31          | mitochondrial ribosomal protein S31              | 1.46  | 0.03 | 1.06  | 0.4282 | 1.06  | 0.5713 | 1.08  | 0.3494 | 1.26  | 0.0809 |
| 103355_at   | 1440213_a_at | 2010001M06Rik   | RIKEN cDNA 2010001M06 gene                       | 4.13  | 0.15 | -1.32 | 0.218  | 1.05  | 0.8563 | -1.65 | 0.0435 | 1.28  | 0.1595 |
| 103356_at   | 1448892_at   | Dock7           | dedicator of cytokinesis 7                       | 1.74  | 0.13 | 1.18  | 0.1666 | 1.04  | 0.8314 | 1.17  | 0.3557 | 2.32  | 0.1174 |
| 103357_at   | 1449067_at   | Slc2a2          | solute carrier family 2 (facilitated glucose tra | 1.19  | 0.56 | 1.23  | 0.0056 | 1.33  | 0.0004 | 1.26  | 0.0119 | 1.31  | 0.0172 |
| 103359_at   | 1451141_at   | BC004636        | cDNA sequence BC004636                           | -1.28 | 0.1  | -1.03 | 0.7403 | 1.03  | 0.7647 | -1.21 | 0.0181 | 1.04  | 0.7121 |
| 103360_at   | 1417989_at   | Tssk1           | testis-specific serine kinase 1                  | 1.07  | 0.88 | 1.42  | 0.2645 | 1.74  | 0.0288 | 1.43  | 0.3384 | -1.24 | 0.4747 |
| 103362_at   | 1424208_at   | ---             | ---                                              | 1.56  | 0.5  | 1.78  | 0.4236 | 1.1   | 0.6286 | 2.23  | 0.2898 | 1.05  | 0.798  |
| 103363_at   | 1416451_s_at | Tbn             | taube nuss                                       | 1.38  | 0.17 | 1.11  | 0.08   | 1.06  | 0.3129 | 1.21  | 0.0058 | -2.46 | 0.0015 |
| 103364_f_at | 1428189_at   | 5730494M16Rik   | RIKEN cDNA 5730494M16 gene                       | 1.06  | 0.81 | -1.25 | 0.0034 | -1.04 | 0.5026 | -1.4  | 0.0001 | -1.2  | 0.271  |
| 103365_s_at | 1449619_s_at | Arhgap9         | Rho GTPase activating protein 9                  | 1.08  | 0.72 | 1.6   | 0.3723 | 1.02  | 0.74   | 2.53  | 0.2331 | 1.28  | 0.3526 |
| 103367_at   | 1418655_at   | Galgt1          | UDP-N-acetyl-alpha-D-galactosamine:(N-ac         | -1.05 | 0.69 | -1.15 | 0.3114 | 1.14  | 0.481  | -1.08 | 0.5776 | 1.13  | 0.1678 |
| 103369_at   | 1436316_at   | 9430029L20Rik   | RIKEN cDNA 9430029L20 gene                       | -1.18 | 0.54 | -1.2  | 0.0727 | 1.29  | 0.2062 | 1     | 0.9728 | 1.07  | 0.8736 |
| 103371_at   | 1416949_s_at | Slc39a7         | solute carrier family 39 (zinc transporter), m   | 1.03  | 0.79 | -1.2  | 0.0342 | 1.02  | 0.8066 | -1.16 | 0.0375 | -1.84 | 0.0041 |
| 103375_at   | 1428401_at   | Zcchc3          | zinc finger, CCHC domain containing 3            | -1.05 | 0.89 | 1.59  | 0.0388 | 1.17  | 0.4716 | 1.48  | 0.3042 | 1.24  | 0.3878 |
| 103376_s_at | 1425760_a_at | Pitnm1          | phosphatidylinositol membrane-associated 1       | 1.32  | 0.41 | 2.59  | 0.0166 | 2.09  | 0.097  | 2.76  | 0.0368 | 1.86  | 0.1072 |
| 103377_at   | 1452320_at   | LOC381369 /// I | similar to low density lipoprotein receptor-rel  | -2.01 | 0.05 | -1.02 | 0.8154 | 1.12  | 0.5244 | 1.03  | 0.7645 | 1.43  | 0.2939 |
| 103378_at   | 1448572_at   | Prlpa           | prolactin-like protein A                         | -2.46 | 0.03 | 2.09  | 0.0921 | 1.4   | 0.2303 | 1.8   | 0.108  | 2.15  | 0.2356 |
| 103379_at   | 1455047_at   | Fbxo3           | F-box only protein 3                             | 1.29  | 0.08 | 1.41  | 0.0004 | 1.34  | 0.0028 | 1.45  | 0.0006 | -1.09 | 0.5512 |
| 103381_at   | 1453014_a_at | Sec3111         | SEC31-like 1 (S. cerevisiae)                     | -1.08 | 0.71 | -1.1  | 0.0089 | -1.02 | 0.5346 | -1.03 | 0.2212 | -1.05 | 0.6601 |
| 103385_at   | 1448126_at   | MGI:1929091     | teratocarcinoma expressed, serine rich           | 1.43  | 0.08 | 1.24  | 0.4469 | 1.95  | 0.0156 | 1.18  | 0.5776 | 1.12  | 0.7955 |
| 103386_at   | 1417449_at   | Pte1            | peroxisomal acyl-CoA thioesterase 1              | 1.38  | 0.52 | -1.09 | 0.4779 | -1.15 | 0.4111 | -1.22 | 0.1326 | -1.59 | 0.2795 |
| 103387_at   | 1416542_at   | Phf1            | PHD finger protein 1                             | -1.74 | 0.06 | 1.09  | 0.1133 | 1.03  | 0.6441 | 1.13  | 0.0999 | 1.35  | 0.0803 |
| 103388_at   | 1451592_at   | MGI:2446472     | Myb protein P42POP                               | -1.18 | 0.15 | -1.03 | 0.7624 | -1.05 | 0.6665 | -1.08 | 0.5199 | 1.03  | 0.8769 |
| 103389_at   | 1423523_at   | Aass            | aminoadipate-semialdehyde synthase               | 2.03  | 0.07 | 1.12  | 0.3019 | 1.03  | 0.7652 | 1.24  | 0.0636 | 1.39  | 0.0399 |
| 103391_at   | 1455991_at   | Ccbl2           | cysteine conjugate-beta lyase 2                  | -2.09 | 0.07 | -1.24 | 0.092  | 1.14  | 0.2773 | -1.34 | 0.0438 | -1.31 | 0.0047 |
| 103392_at   | 1456307_s_at | Adcy7           | Adenylate cyclase 7                              | 1.09  | 0.84 | 1.11  | 0.7535 | -1.45 | 0.0699 | 1.37  | 0.3038 | -1.05 | 0.8873 |
| 103393_at   | 1423192_at   | Pspc1           | paraspeckle protein 1                            | -1.33 | 0.4  | -1    | 0.9923 | 1.03  | 0.9106 | -1.01 | 0.9616 | -1.01 | 0.9815 |
| 103394_at   | 1418296_at   | Fxyd5           | FXVD domain-containing ion transport regul       | 1.3   | 0.6  | 1.68  | 0.205  | -1.12 | 0.5658 | 2.02  | 0.0973 | 1.91  | 0.0516 |
| 103397_at   | 1426922_s_at | Hrb             | HIV-1 Rev binding protein                        | 1.62  | 0.28 | 1.19  | 0.1186 | 1.27  | 0.1698 | 1.37  | 0.0235 | 1.42  | 0.2025 |
| 103398_at   | 1424027_at   | ---             | ---                                              | 1.13  | 0.4  | 1.03  | 0.7487 | -1.04 | 0.73   | -1.03 | 0.8063 | 1.47  | 0      |
| 103399_at   | 1426241_a_at | Scmh1           | sex comb on midleg homolog 1                     | -1.76 | 0.46 | 1.08  | 0.6076 | 1.06  | 0.7301 | 1.05  | 0.7784 | 2.23  | 0.0393 |
| 103400_at   | 1415708_at   | Al316828        | expressed sequence Al316828                      | 1.32  | 0.21 | 1.22  | 0.011  | 1.21  | 0.0259 | 1.19  | 0.0014 | 1.32  | 0.04   |
| 103401_at   | 1460216_at   | Acads           | acyl-Coenzyme A dehydrogenase, short cha         | 1.62  | 0.18 | -1.01 | 0.8309 | -1.02 | 0.8678 | 1.02  | 0.8175 | -1.25 | 0.5651 |
| 103402_at   | 1452664_a_at | Tm7sf3          | transmembrane 7 superfamily member 3             | -1.02 | 0.89 | 1.16  | 0.0492 | 1.1   | 0.5867 | 1.17  | 0.0239 | -1.46 | 0.0498 |
| 103403_at   | 1452889_at   | 2310007H09Rik   | RIKEN cDNA 2310007H09 gene                       | 4.05  | 0.34 | 1.08  | 0.7911 | -1.07 | 0.8102 | -1.08 | 0.7934 | 1.17  | 0.8032 |
| 103404_at   | 1454670_at   | Rere            | arginine glutamic acid dipeptide (RE) repeat     | 1.45  | 0.04 | 1.16  | 0.0037 | 1.33  | 0.0001 | 1.31  | 0      | 1.7   | 0      |
| 103405_at   | 1428188_at   | 2610019A05Rik   | RIKEN cDNA 2610019A05 gene                       | 1.33  | 0.61 | 1.7   | 0.0202 | 1.15  | 0.6435 | 1.6   | 0.0355 | 1.04  | 0.9013 |
| 103406_at   | 1417390_at   | Xab1            | XPA binding protein 1                            | 1.31  | 0.25 | -1.06 | 0.1328 | -1.01 | 0.9552 | 1.02  | 0.7648 | -1.14 | 0.3175 |
| 103407_at   | 1424722_at   | 1300017J02Rik   | RIKEN cDNA 1300017J02 gene                       | -1.55 | 0.01 | -1.17 | 0.0062 | 1.11  | 0.173  | -1.19 | 0.0032 | -1.52 | 0.0003 |
| 103408_at   | 1436589_x_at | Prkd2           | protein kinase D2                                | 2.21  | 0.02 | 1.21  | 0.2645 | 1.11  | 0.6117 | 1.08  | 0.7151 | 1.25  | 0.5573 |
| 103409_at   | 1451539_at   | Baiap211        | BAI1-associated protein 2-like 1                 | 1.2   | 0.07 | 1.25  | 0.0272 | 1.41  | 0.0002 | 1.33  | 0.0111 | 1.89  | 0.008  |
| 103411_at   | 1434254_at   | Gna11           | guanine nucleotide binding protein, alpha 11     | 1.63  | 0.07 | -1.12 | 0.4246 | 1.01  | 0.9541 | -1.17 | 0.335  | 1.24  | 0.1578 |
| 103412_at   | 1435321_at   | 3732412D22Rik   | RIKEN cDNA 3732412D22 gene                       | -1.53 | 0.42 | 1.18  | 0.6389 | -2.25 | 0.0263 | -1.41 | 0.252  | -1.16 | 0.8078 |
| 103413_at   | 1417873_at   | 2310058A11Rik   | RIKEN cDNA 2310058A11 gene                       | -1.14 | 0.31 | 1.2   | 0.0047 | 1.11  | 0.31   | -1    | 0.9794 | 1.33  | 0.1979 |

|             |              |                  |                                                             |       |      |       |        |       |        |       |        |        |        |
|-------------|--------------|------------------|-------------------------------------------------------------|-------|------|-------|--------|-------|--------|-------|--------|--------|--------|
| 103414_at   | 1422584_at   | Skiv2l           | superkiller viralicidic activity 2-like (S. cerevisiae)     | -1.24 | 0.27 | -1.06 | 0.1548 | -1.02 | 0.6037 | -1.11 | 0.0023 | -1.23  | 0.1492 |
| 103415_at   | 1448376_at   | Wrrnip1          | Werner helicase interacting protein 1                       | -1.14 | 0.46 | -1.04 | 0.7115 | 1.03  | 0.847  | -1.2  | 0.1149 | 1.03   | 0.7787 |
| 103416_at   | 1419169_at   | Mapk6            | mitogen-activated protein kinase 6                          | -1.05 | 0.82 | -1.01 | 0.8036 | 1.13  | 0.1622 | -1.05 | 0.3678 | -1.3   | 0.1275 |
| 103418_at   | 1424321_at   | Rfc4             | replication factor C (activator 1) 4                        | 2.36  | 0.16 | -1.03 | 0.899  | 1.25  | 0.3513 | 1.54  | 0.0075 | -2.44  | 0.0977 |
| 103420_at   | 1417357_at   | Emd              | emerin                                                      | 1.05  | 0.74 | 1.01  | 0.8366 | -1.2  | 0.0004 | -1.09 | 0.0306 | 1.34   | 0.001  |
| 103421_at   | 1423465_at   | Sdfr2            | stromal cell derived factor receptor 2                      | 1.15  | 0.59 | -1.1  | 0.2015 | 1.3   | 0.0001 | 1.13  | 0.0422 | -1.09  | 0.6853 |
| 103422_at   | 1449131_s_at | Cd1d1            | CD1d1 antigen                                               | -1.34 | 0.23 | 1.08  | 0.3397 | -1.12 | 0.2691 | -1.05 | 0.6312 | -1.34  | 0.0054 |
| 103423_at   | 1417507_at   | Cyb561           | cytochrome b-561                                            | 1.39  | 0.53 | -1.68 | 0.0583 | -1.83 | 0.0592 | -1.29 | 0.5633 | -2.76  | 0.0329 |
| 103424_at   | 1454632_at   | 6330442E10Rik    | RIKEN cDNA 6330442E10 gene                                  | -1.18 | 0.44 | 1.16  | 0.4047 | 1.04  | 0.6943 | 1.28  | 0.1641 | 1.05   | 0.8269 |
| 103427_at   | 1454635_at   | Fbxl3            | F-box and leucine-rich repeat protein 3                     | 1.36  | 0.35 | 1.04  | 0.616  | 1.07  | 0.6135 | 1.17  | 0.0052 | 1.25   | 0.1993 |
| 103428_at   | 1426838_at   | Pold3            | polymerase (DNA-directed), delta 3, accessory               | -1.19 | 0.37 | -1.05 | 0.3195 | -1.07 | 0.3777 | -1.1  | 0.1187 | 1.07   | 0.2846 |
| 103432_at   | 1419569_a_at | Isg20            | interferon-stimulated protein                               | 7.99  | 0.01 | -1.32 | 0.4932 | -1.54 | 0.2374 | -1.23 | 0.5528 | -1.05  | 0.7972 |
| 103433_at   | 1418758_a_at | Pscd3            | pleckstrin homology, Sec7 and coiled-coil domain containing | 2.03  | 0.1  | 1.22  | 0.1618 | 1.02  | 0.8977 | 1.28  | 0.1308 | -1.08  | 0.8206 |
| 103434_at   | 1431707_a_at | Pscd3            | pleckstrin homology, Sec7 and coiled-coil domain containing | 1.63  | 0.14 | 1.11  | 0.3112 | 1.43  | 0.2784 | 1.12  | 0.2205 | 1      | 0.9905 |
| 103435_at   | 1434184_s_at | 9430080K19Rik    | RIKEN cDNA 9430080K19 gene                                  | 1.13  | 0.77 | 1.12  | 0.4932 | 1.1   | 0.5044 | 1.23  | 0.3716 | 2.95   | 0.0558 |
| 103436_at   | 1450023_at   | ---              | ---                                                         | -1.21 | 0.52 | -1.15 | 0.3567 | -1.03 | 0.8549 | -1.11 | 0.3386 | -1.17  | 0.7027 |
| 103437_at   | 1450929_at   | Zfp57            | zinc finger protein 57                                      | -1.15 | 0.58 | 1.09  | 0.4548 | 1.3   | 0.015  | 1.01  | 0.8736 | -1.03  | 0.8383 |
| 103438_at   | 1418937_at   | Dio2             | deiodinase, iodothyronine, type II                          | -1.83 | 0.03 | -1.66 | 0.0213 | -1.41 | 0.1103 | -1.41 | 0.099  | -1.07  | 0.8076 |
| 103439_at   | 1435780_at   | Psd              | pleckstrin and Sec7 domain containing                       | -1.65 | 0.03 | -1.16 | 0.1771 | -1.37 | 0.0367 | -1.04 | 0.7783 | -1.12  | 0.4051 |
| 103440_at   | 1450664_at   | Gabpa            | GA repeat binding protein, alpha                            | 1.25  | 0.42 | 1.2   | 0.0485 | 1.23  | 0.1626 | 1.25  | 0.0077 | 1.05   | 0.6741 |
| 103441_at   | 1419036_at   | Csnk2a1          | casein kinase II, alpha 1 polypeptide                       | 2.01  | 0.1  | 1.03  | 0.7001 | 1.12  | 0.1891 | 1.08  | 0.2984 | 1.02   | 0.9388 |
| 103442_at   | 1424869_at   | BC003479         | cDNA sequence BC003479                                      | 1.34  | 0.24 | -1.17 | 0.0196 | -1.27 | 0.0018 | -1.24 | 0.0044 | -1.78  | 0.0281 |
| 103443_at   | 1426942_at   | Aim1             | absent in melanoma 1                                        | 1.18  | 0.56 | 1.14  | 0.4338 | 1.13  | 0.3856 | 1.42  | 0.0394 | 1.01   | 0.9367 |
| 103444_at   | 1452210_at   | Dna2l            | DNA2 DNA replication helicase 2-like (yeast)                | -1.43 | 0.24 | 1.32  | 0.0589 | 2.03  | 0.0032 | 1.51  | 0.0004 | 1.18   | 0.5671 |
| 103445_at   | 1451660_a_at | Hoxb6            | homeo box B6                                                | -1.39 | 0.07 | -1.24 | 0.2339 | -1.18 | 0.4165 | -1.17 | 0.3975 | 1.23   | 0.1419 |
| 103446_at   | 1426276_at   | Ilfih1           | interferon induced with helicase C domain 1                 | -1.18 | 0.6  | -1.06 | 0.6467 | 1.07  | 0.6434 | 1.05  | 0.6496 | -1.67  | 0.0075 |
| 103447_at   | 1434445_at   | D15Wsu169e       | DNA segment, Chr 15, Wayne State University                 | -1.08 | 0.74 | -1.13 | 0.0965 | -1.06 | 0.4855 | -1.14 | 0.036  | -1.12  | 0.6657 |
| 103448_at   | 1419394_s_at | S100a8           | S100 calcium binding protein A8 (calgranulin A)             | 1.45  | 0.43 | 1.5   | 0.2136 | -1.27 | 0.1758 | 1.69  | 0.2724 | 1.74   | 0.0158 |
| 103449_at   | 1455155_at   | BC040823         | cDNA sequence BC040823                                      | 1.12  | 0.4  | 1.02  | 0.8264 | 1.41  | 0.0506 | 1.21  | 0.0946 | 1.16   | 0.5068 |
| 103450_at   | 1428454_at   | Bcas3            | breast carcinoma amplified sequence 3                       | 1.35  | 0.21 | -1.1  | 0.4662 | 1.06  | 0.7187 | 1.06  | 0.5789 | 1      | 0.9958 |
| 103451_at   | 1434653_at   | Ptk2b            | PTK2 protein tyrosine kinase 2 beta                         | -1.66 | 0.08 | -1.3  | 0.0042 | -1.3  | 0.0012 | -1.39 | 0.0003 | -1.04  | 0.4765 |
| 103452_at   | 1432099_a_at | Prodh2           | proline dehydrogenase (oxidase) 2                           | 1.28  | 0.32 | -1.17 | 0.0139 | -1.05 | 0.423  | -1.2  | 0.0013 | -1.16  | 0.3922 |
| 103456_at   | 1455741_a_at | Ece1             | endothelin converting enzyme 1                              | 1.21  | 0.18 | 1.07  | 0.5332 | 1.04  | 0.7373 | 1     | 0.9818 | 1.08   | 0.5844 |
| 103457_at   | 1424632_a_at | Rev3l            | REV3-like, catalytic subunit of DNA polymerase delta        | -1.35 | 0.05 | -1    | 0.9851 | 1.08  | 0.4369 | -1.03 | 0.7299 | -1.41  | 0.2096 |
| 103458_at   | 1419407_at   | Hc               | hemolytic complement                                        | 1.18  | 0.38 | 1.09  | 0.1146 | 1.03  | 0.5991 | 1.06  | 0.2472 | -1.49  | 0.0121 |
| 103459_at   | 1424674_at   | Slc39a6          | solute carrier family 39 (metal ion transporter)            | 1.3   | 0.53 | -1.15 | 0.5137 | -1.12 | 0.5658 | 1.09  | 0.5871 | 1.5    | 0.5211 |
| 103460_at   | 1428306_at   | Ddit4            | DNA-damage-inducible transcript 4                           | 1.68  | 0.07 | -1.1  | 0.6749 | 1.3   | 0.6807 | -1.06 | 0.7912 | -1.65  | 0.0961 |
| 103462_at   | 1422808_s_at | Dock2            | dedicator of cyto-kinesis 2                                 | -1.26 | 0.41 | 1.81  | 0.0351 | -1.07 | 0.783  | 1.83  | 0.1979 | 1.69   | 0.2763 |
| 103463_at   | 1438468_at   | Pramel4 /// Prar | preferentially expressed antigen in melanoma                | -2.08 | 0.26 | -1.05 | 0.8399 | -1.2  | 0.4427 | 1.14  | 0.5037 | 1.42   | 0.5596 |
| 103465_f_at | 1449326_x_at | Saa2             | serum amyloid A 2                                           | 3.32  | 0.02 | 1.57  | 0.4964 | -3.87 | 0.0829 | 1.51  | 0.5144 | -22.58 | 0.0776 |
| 103467_g_at | 1435364_at   | Cyhr1            | Cysteine and histidine rich 1                               | 1.39  | 0.23 | 1.39  | 0.0484 | 1.98  | 0.0008 | 1.6   | 0.0057 | 1.34   | 0.4013 |
| 103468_at   | 1419402_at   | Mns1             | meiosis-specific nuclear structural protein 1               | -1.59 | 0.45 | 1.03  | 0.8859 | -1.09 | 0.4736 | -1.2  | 0.3505 | 1.28   | 0.2812 |
| 103470_at   | 1456270_s_at | Pramel6          | preferentially expressed antigen in melanoma                | -2    | 0.41 | -1.22 | 0.5236 | -1.14 | 0.7222 | -1.19 | 0.557  | -1.05  | 0.8678 |
| 103471_at   | 1416061_at   | Tbc1d15          | TBC1 domain family, member 15                               | 1.39  | 0.11 | 1.35  | 0.0115 | 1.45  | 0.0005 | 1.49  | 0.0009 | 1.17   | 0.1467 |
| 103472_at   | 1447604_at   | BC053393         | CDNA sequence BC053393                                      | 2.2   | 0.52 | 1.42  | 0.1251 | 1.24  | 0.1041 | 2.49  | 0.1555 | 1.5    | 0.2404 |
| 103476_at   | 1454796_at   | D5Ert40e         | DNA segment, Chr 5, ERATO Doi 40, expressed                 | -1.04 | 0.89 | 1.23  | 0.003  | 1.21  | 0.0164 | 1.2   | 0.0084 | 1.21   | 0.3507 |
| 103477_at   | 1449582_at   | Cdx1             | caudal type homeo box 1                                     | -1.97 | 0.39 | 1.4   | 0.1103 | 1.38  | 0.1146 | 1.37  | 0.1374 | 2.47   | 0.1845 |
| 103478_at   | 1456869_at   | 2210018M03Rik    | RIKEN cDNA 2210018M03 gene                                  | -1.82 | 0.09 | -1.17 | 0.2388 | -1.11 | 0.4027 | -1.43 | 0.0528 | 1.78   | 0.1102 |
| 103479_at   | 1435756_at   | Samd10           | sterile alpha motif domain containing 10                    | -1.07 | 0.74 | 1.78  | 0.0073 | 1.65  | 0.0015 | 1.5   | 0.0086 | 1.41   | 0.2458 |
| 103480_at   | 1419696_at   | Cd4              | CD4 antigen                                                 | -1.34 | 0.14 | -1.19 | 0.2489 | -1.09 | 0.5549 | -1.02 | 0.9178 | 1.37   | 0.4055 |
| 103483_at   | 1450935_at   | Erc5             | excision repair cross-complementing rodent                  | 1.66  | 0.31 | 1.05  | 0.6412 | 1.26  | 0.0265 | 1.26  | 0.0795 | 1.7    | 0.2564 |
| 103484_at   | 1423856_at   | Popdc3           | popliteal muscle domain containing 3                        | -1.42 | 0.58 | -1.1  | 0.7269 | 1.24  | 0.4671 | -1.2  | 0.5291 | 2.03   | 0.2968 |
| 103485_at   | 1439064_at   | BC030046         | cDNA sequence BC030046                                      | -1.32 | 0.15 | -1.09 | 0.3351 | 1.07  | 0.4461 | -1.16 | 0.0683 | 1.05   | 0.8115 |

|             |              |                |                                                 |       |      |       |        |       |        |       |        |       |        |
|-------------|--------------|----------------|-------------------------------------------------|-------|------|-------|--------|-------|--------|-------|--------|-------|--------|
| 103486_at   | 1449399_a_at | Il1b           | interleukin 1 beta                              | 2.23  | 0.14 | 4.85  | 0.203  | 1.77  | 0.3315 | 6.49  | 0.1646 | 1.1   | 0.779  |
| 103487_at   | 1422625_at   | Ly6h           | lymphocyte antigen 6 complex, locus H           | -3.78 | 0.01 | -1.09 | 0.7144 | -1.01 | 0.9746 | -1.29 | 0.3279 | 1.27  | 0.4721 |
| 103488_at   | 1449127_at   | Selpl          | selectin, platelet (p-selectin) ligand          | -1.14 | 0.51 | 1.21  | 0.2056 | -1    | 0.9985 | 1.33  | 0.1748 | -1.02 | 0.843  |
| 103489_at   | 1426105_a_at | D4Bwg1540e     | DNA segment, Chr 4, Brigham & Women's C         | -2.12 | 0.05 | 1.07  | 0.8031 | -1.2  | 0.5078 | 1.16  | 0.6511 | 1.05  | 0.8543 |
| 103490_at   | 1450772_at   | Wnt11          | wingless-related MMTV integration site 11       | -1.11 | 0.74 | -1.35 | 0.0711 | -1.19 | 0.3084 | -1.34 | 0.0367 | 1.27  | 0.1547 |
| 103492_at   | 1448901_at   | Cpxm1          | carboxypeptidase X 1 (M14 family)               | 2.1   | 0.1  | 1.63  | 0.0658 | 1.3   | 0.3914 | 1.2   | 0.4264 | 1.29  | 0.4363 |
| 103493_at   | 1419405_at   | Nmb            | neuromedin B                                    | -1.45 | 0.5  | 1.13  | 0.7235 | 1.39  | 0.3886 | 1.56  | 0.268  | -1.19 | 0.5875 |
| 103494_at   | 1424649_a_at | Tspan8         | tetraspanin 8                                   | 1.72  | 0.46 | -1.09 | 0.7378 | 1.5   | 0.3916 | -1.01 | 0.9702 | 1.17  | 0.6083 |
| 103495_at   | 1449650_at   | Etnk1          | Ethanolamine kinase 1                           | -1.48 | 0.29 | -1.16 | 0.6025 | 1.08  | 0.7786 | -1.08 | 0.7839 | 2.02  | 0.2045 |
| 103496_at   | 1419396_at   | Arid3a         | AT rich interactive domain 3A (Bright like)     | -1.51 | 0.27 | 1.21  | 0.3497 | 1.15  | 0.5865 | 1.35  | 0.2659 | 1.71  | 0.3206 |
| 103498_at   | 1450127_a_at | Gcgr           | glucagon receptor                               | 1.08  | 0.73 | -1.08 | 0.2741 | 1.08  | 0.215  | 1.02  | 0.8583 | -1.5  | 0.0282 |
| 103499_at   | 1435386_at   | Vwf            | Von Willebrand factor homolog                   | 2.59  | 0.04 | -1.32 | 0.4183 | 1.17  | 0.582  | 1.34  | 0.3218 | 2.06  | 0.0666 |
| 103500_at   | 1437382_at   | Acvr2          | activin receptor IIA                            | 1.09  | 0.26 | -1.05 | 0.5874 | 1.21  | 0.0567 | -1.07 | 0.3698 | -1.07 | 0.5354 |
| 103501_at   | 1449934_at   | Pura           | purine rich element binding protein A           | -1.15 | 0.76 | 1.1   | 0.1966 | -1.31 | 0.1058 | -1.15 | 0.4021 | 1.38  | 0.157  |
| 103502_at   | 1436399_s_at | Nrk            | Nik related kinase                              | -2.18 | 0.22 | -2.15 | 0.0071 | -1.5  | 0.0917 | -1.17 | 0.6141 | 1.1   | 0.883  |
| 103503_at   | 1426926_at   | Plcg2          | phospholipase C, gamma 2                        | 1.5   | 0.49 | 1.49  | 0.2696 | -1.31 | 0.265  | 1.35  | 0.494  | 1.28  | 0.3521 |
| 103504_at   | 1449815_a_at | Ssbp2          | single-stranded DNA binding protein 2           | -1.29 | 0.51 | 1.08  | 0.4657 | -1.03 | 0.7492 | 1.06  | 0.3903 | -1.04 | 0.8271 |
| 103506_f_at | 1426911_at   | Dsc2           | desmocollin 2                                   | 1.45  | 0.3  | 1.02  | 0.7478 | 1.01  | 0.9219 | 1.02  | 0.807  | 1.08  | 0.6596 |
| 103507_at   | 1451161_a_at | Emr1           | EGF-like module containing, mucin-like, hor     | 1.07  | 0.69 | -1.19 | 0.5058 | -1.29 | 0.1266 | 1.29  | 0.5011 | -1.71 | 0.0844 |
| 103509_at   | 1460469_at   | Tnfrsf9        | tumor necrosis factor receptor superfamily, r   | -3.15 | 0.27 | -1.14 | 0.5628 | -1.08 | 0.7511 | 1.03  | 0.9093 | 2     | 0.1108 |
| 103510_at   | 1449382_at   | Slc6a12        | solute carrier family 6 (neurotransmitter tran  | 1.66  | 0.02 | -1.12 | 0.1117 | -1.09 | 0.2356 | -1.17 | 0.0304 | -1.29 | 0.1843 |
| 103512_at   | 1453047_at   | Bzrpl1         | benzodiazepine receptor, peripheral-like 1      | -1.41 | 0.16 | -1.2  | 0.0653 | -1.22 | 0.042  | -1.23 | 0.0312 | 1.07  | 0.615  |
| 103513_at   | 1422602_a_at | Wnt5b          | wingless-related MMTV integration site 5B       | -1.05 | 0.87 | -1.48 | 0.0051 | -1.09 | 0.3789 | -1.49 | 0.0008 | 1.46  | 0.3822 |
| 103515_at   | 1433709_at   | Cant1          | calcium activated nucleotidase 1                | 1.08  | 0.74 | 1.01  | 0.9531 | 1.08  | 0.2394 | 1.06  | 0.4669 | 1.79  | 0.0113 |
| 103516_at   | 1418925_at   | Celsr1         | cadherin EGF LAG seven-pass G-type recej        | -4.59 | 0    | -7.23 | 0.002  | -1.17 | 0.6238 | -7.7  | 0.0019 | -1.14 | 0.6416 |
| 103518_at   | 1452352_at   | Ctla2b         | cytotoxic T lymphocyte-associated protein 2     | 1.66  | 0    | -2.8  | 0.0029 | -1.16 | 0.5885 | -1.18 | 0.6892 | 1.12  | 0.8006 |
| 103519_at   | 1449486_at   | Ces1           | carboxylesterase 1                              | 2.11  | 0.1  | 1.32  | 0.0008 | 1.06  | 0.5654 | 1.34  | 0.0002 | 1.22  | 0.0431 |
| 103522_at   | 1450805_at   | Sgcd           | sarcoglycan, delta (dystrophin-associated gl    | 1.01  | 0.98 | -1.48 | 0.1293 | 1.28  | 0.3939 | -1.03 | 0.9259 | 1.05  | 0.9245 |
| 103523_at   | 1435152_at   | Leng9          | Leukocyte receptor cluster (LRC) member 9       | -1.61 | 0.06 | -1.04 | 0.7979 | -1.03 | 0.8662 | 1.03  | 0.8436 | 1.53  | 0.581  |
| 103525_at   | 1425255_s_at | Hnrpl          | heterogeneous nuclear ribonucleoprotein L-I     | 1.13  | 0.44 | 1.06  | 0.4736 | 1.25  | 0.1174 | 1.11  | 0.182  | 1.18  | 0.3925 |
| 103526_at   | 1418252_at   | Padi2          | peptidyl arginine deiminase, type II            | -1.48 | 0.01 | -1.03 | 0.7922 | -1.04 | 0.819  | 1.08  | 0.6409 | 1.26  | 0.103  |
| 103527_at   | 1436693_x_at | Slc35e4        | solute carrier family 35, member E4             | -2.4  | 0.21 | -1.99 | 0.0191 | -1.3  | 0.4165 | -1.02 | 0.9343 | 1.16  | 0.7433 |
| 103529_at   | 1449125_at   | 2600017J23Rik  | RIKEN cDNA 2600017J23 gene                      | -1.02 | 0.93 | -1.39 | 0.0005 | 1.06  | 0.5553 | -1.55 | 0.0001 | 1.01  | 0.9481 |
| 103531_f_at | 1434714_at   | 1300013B24Rik  | RIKEN cDNA 1300013B24 gene                      | -1.7  | 0.1  | -1.64 | 0      | 1.06  | 0.5301 | -1.49 | 0      | -2.51 | 0.0005 |
| 103532_at   | 1435172_at   | Eomes          | eomesodermin homolog (Xenopus laevis)           | -1.47 | 0.63 | 1.1   | 0.8631 | -2.28 | 0.2063 | -1.28 | 0.6579 | 3.96  | 0.0049 |
| 103533_at   | 1450736_a_at | Hbb-bh1        | hemoglobin Z, beta-like embryonic chain         | -1.95 | 0.36 | 1.15  | 0.456  | 1.03  | 0.8673 | 1.62  | 0.1251 | 1.09  | 0.5727 |
| 103534_at   | 1417184_s_at | Hbb /// Hbb-b1 | / hemoglobin beta chain complex /// hemoglol    | 1.16  | 0.56 | -1.16 | 0.2911 | -1.97 | 0.0009 | -1.2  | 0.2963 | -1.47 | 0.247  |
| 103535_at   | 1450621_a_at | Hbb-y          | hemoglobin Y, beta-like embryonic chain         | 1.06  | 0.81 | 1.1   | 0.3451 | 1.13  | 0.1612 | -1.1  | 0.4202 | -1.27 | 0.6127 |
| 103536_at   | 1419073_at   | Tmeff2         | transmembrane protein with EGF-like and tv      | -1.44 | 0.42 | 1.1   | 0.7269 | -1.28 | 0.47   | 1.2   | 0.6334 | 1.58  | 0.3199 |
| 103537_at   | 1449278_at   | Eif2ak3        | eukaryotic translation initiation factor 2 alph | -1.02 | 0.97 | 1.12  | 0.5859 | 1.31  | 0.1622 | 1.16  | 0.1749 | 1.77  | 0.0075 |
| 103538_at   | 1448029_at   | Tbx3           | T-box 3                                         | -1.26 | 0.25 | 1.31  | 0.1036 | -1.05 | 0.8136 | -1.38 | 0.1529 | 2     | 0.0726 |
| 103539_at   | 1460204_at   | Tec            | cytoplasmic tyrosine kinase, Dscr28C relate     | -1.07 | 0.48 | -1.11 | 0.2472 | -1.07 | 0.4492 | -1.11 | 0.2079 | 1.18  | 0.7677 |
| 103540_at   | 1448038_at   | ---            | ---                                             | -1.21 | 0.26 | 1.12  | 0.1263 | -1.16 | 0.0653 | 1.03  | 0.6666 | 1.23  | 0.1725 |
| 103541_at   | 1425009_at   | Tcte2          | t-complex-associated testis expressed 2         | -2.11 | 0.03 | -1.33 | 0.1441 | -1.05 | 0.7322 | -1.19 | 0.2488 | 1.16  | 0.6069 |
| 103542_at   | 1427051_at   | Tnks1bp1       | tankyrase 1 binding protein 1                   | 1.13  | 0.55 | -1.05 | 0.6538 | -1.15 | 0.1771 | -1.26 | 0.0254 | 1.41  | 0.0916 |
| 103543_at   | 1424764_at   | Sez6l          | seizure related 6 homolog (mouse)-like          | -1.65 | 0.3  | -1.08 | 0.7487 | -1.1  | 0.6969 | 1.02  | 0.9484 | 1.38  | 0.6177 |
| 103544_at   | 1418869_a_at | Pus1           | pseudouridine synthase 1                        | 2.46  | 0.01 | 1.27  | 0.1043 | 1.25  | 0.1131 | 1.09  | 0.5665 | -1.28 | 0.3554 |
| 103546_at   | 1422931_at   | Fosl2          | fos-like antigen 2                              | -1.03 | 0.91 | 1.19  | 0.1811 | -1.08 | 0.6208 | -1.22 | 0.2281 | 1.24  | 0.6588 |
| 103547_at   | 1460565_at   | Slc41a1        | solute carrier family 41, member 1              | 2.44  | 0.07 | 1.2   | 0.5141 | 1.04  | 0.8783 | 1.73  | 0.0711 | 1.19  | 0.6524 |
| 103548_at   | 1419411_at   | Tac2           | tachykinin 2                                    | -2.41 | 0.08 | -1.12 | 0.5441 | 1.09  | 0.7173 | -1.3  | 0.0915 | 1.13  | 0.7471 |
| 103549_at   | 1449022_at   | Nes            | nestin                                          | 1.26  | 0.2  | -1.07 | 0.63   | -1.08 | 0.5935 | -1.11 | 0.4351 | 1.48  | 0.3333 |
| 103551_at   | 1425543_s_at | Plekha5        | pleckstrin homology domain containing, fam      | -1.04 | 0.78 | -1.01 | 0.8588 | -1.01 | 0.897  | -1.06 | 0.4476 | -1.03 | 0.8246 |
| 103552_at   | 1443856_at   | Rabep1         | rabaptin, RAB GTPase binding effector prot      | 1.18  | 0.59 | 1.04  | 0.7723 | -1.08 | 0.6086 | -1.14 | 0.1648 | 1.11  | 0.5948 |

|             |              |               |                                               |       |      |        |        |       |        |       |        |       |        |
|-------------|--------------|---------------|-----------------------------------------------|-------|------|--------|--------|-------|--------|-------|--------|-------|--------|
| 103553_at   | 1433408_a_at | Mcm10         | minichromosome maintenance deficient 10 (     | -1.12 | 0.66 | -1.16  | 0.2776 | 1.12  | 0.2534 | -1.13 | 0.2542 | -1.66 | 0.002  |
| 103554_at   | 1418402_at   | Adam19        | a disintegrin and metalloproteinase domain    | 1.67  | 0.42 | 1.5    | 0.3566 | 1.24  | 0.6042 | 1.37  | 0.3216 | 1.01  | 0.9803 |
| 103555_at   | 1451988_s_at | Chmp4b        | chromatin modifying protein 4B                | 1.07  | 0.57 | 1.03   | 0.7165 | -1.09 | 0.2659 | -1.01 | 0.8249 | -1.26 | 0.0258 |
| 103556_at   | 1455090_at   | Ralgps1       | Ral GEF with PH domain and SH3 binding n      | 1.16  | 0.12 | -1.39  | 0.0001 | 1.04  | 0.4154 | -1.3  | 0.0033 | -3.7  | 0.002  |
| 103557_at   | 1426227_s_at | 5730409F24Rik | RIKEN cDNA 5730409F24 gene                    | -1.05 | 0.78 | 1.11   | 0.1642 | 1.23  | 0.0256 | 1.29  | 0.0031 | -1.03 | 0.8146 |
| 103558_at   | 1421589_at   | Krt1-1        | keratin complex 1, acidic, gene 1             | 1.4   | 0.42 | -1.17  | 0.1518 | -1.11 | 0.3209 | -1.1  | 0.4528 | 1.58  | 0.2566 |
| 103559_at   | 1450519_a_at | Prkaca        | protein kinase, cAMP dependent, catalytic, ε  | 1.08  | 0.55 | 1.1    | 0.3507 | -1.18 | 0.1275 | -1.07 | 0.4556 | -1.17 | 0.3483 |
| 103560_at   | 1428626_at   | 2210402C18Rik | RIKEN cDNA 2210402C18 gene                    | 6.75  | 0.15 | -1.12  | 0.6914 | 1.07  | 0.8217 | 1.09  | 0.7527 | 1.56  | 0.4152 |
| 103563_at   | 1435226_at   | lbrdc3        | IBR domain containing 3                       | 2.75  | 0.02 | 1.1    | 0.2833 | 1.06  | 0.4902 | 1.29  | 0.077  | 1.11  | 0.6466 |
| 103564_at   | 1454706_at   | Uvrag         | UV radiation resistance associated gene       | 1.25  | 0.31 | -1.1   | 0.2171 | -1.16 | 0.163  | 1.04  | 0.5861 | 1.04  | 0.9376 |
| 103565_at   | 1417886_at   | 1810009A15Rik | RIKEN cDNA 1810009A15 gene                    | 1.46  | 0.08 | -1.22  | 0.0537 | -1.15 | 0.1832 | -1.25 | 0.0865 | -1.06 | 0.7998 |
| 103567_at   | 1415758_at   | 2510002A14Rik | RIKEN cDNA 2510002A14 gene                    | -1.26 | 0.09 | -1.06  | 0.2995 | 1.02  | 0.6864 | 1     | 0.9975 | 1.14  | 0.3948 |
| 103568_at   | 1451939_a_at | Srpx          | sushi-repeat-containing protein               | -2.09 | 0.09 | 1.37   | 0.1897 | 1.17  | 0.5169 | 1.64  | 0.0448 | 1.33  | 0.2809 |
| 103570_at   | 1422606_at   | C1qtnf3       | C1q and tumor necrosis factor related protei  | 3.73  | 0    | -1.74  | 0.0065 | -1.67 | 0.0347 | -1.44 | 0.2032 | 1.25  | 0.3795 |
| 103571_at   | 1425548_a_at | Lst1          | leukocyte specific transcript 1               | 1.25  | 0.27 | 1.23   | 0.5223 | -1.1  | 0.5911 | 1.12  | 0.7473 | 1.11  | 0.7439 |
| 103573_at   | 1450389_s_at | Pip5k1a       | phosphatidylinositol-4-phosphate 5-kinase, t  | -2.07 | 0.1  | -1.16  | 0.4437 | 1.05  | 0.7007 | -1.08 | 0.5085 | 1.15  | 0.4913 |
| 103574_at   | 1454708_at   | Ablim1        | actin-binding LIM protein 1                   | 1.51  | 0.11 | 1.15   | 0.1594 | 1.18  | 0.1732 | 1.18  | 0.0558 | 1.73  | 0.053  |
| 103578_at   | 1431188_a_at | Tom1          | target of myb1 homolog (chicken)              | -1.2  | 0.08 | -1.11  | 0.1211 | -1.02 | 0.7735 | -1.05 | 0.4233 | -1.32 | 0.1017 |
| 103579_at   | 1417620_at   | Rac2          | RAS-related C3 botulinum substrate 2          | -1.48 | 0.01 | 1      | 0.9761 | -1.16 | 0.015  | -1.01 | 0.9136 | 1.2   | 0.3224 |
| 103580_at   | 1424026_s_at | BC013529      | cDNA sequence BC013529                        | 1.47  | 0.1  | -1.51  | 0.0007 | -1.38 | 0.005  | -1.37 | 0.0078 | -2.51 | 0.0246 |
| 103581_at   | 1449065_at   | Cte1          | cytosolic acyl-CoA thioesterase 1             | -1.58 | 0.02 | -1.23  | 0.1905 | 1.6   | 0.0736 | -1.21 | 0.353  | -1.45 | 0.048  |
| 103582_r_at | 1452054_at   | 6130401J04Rik | RIKEN cDNA 6130401J04 gene                    | 1.44  | 0.46 | 1.3    | 0.0665 | 1.15  | 0.4597 | 1.39  | 0.0407 | -1.13 | 0.6164 |
| 103584_at   | 1453015_at   | 5830471E12Rik | RIKEN cDNA 5830471E12 gene                    | -1.39 | 0.02 | 1.06   | 0.109  | -1.01 | 0.8809 | -1.08 | 0.0433 | -1.02 | 0.9011 |
| 103585_at   | 1454794_at   | ---           | ---                                           | -1.7  | 0    | 1.14   | 0.3055 | 1.15  | 0.4338 | 1.03  | 0.8116 | 1.42  | 0.0943 |
| 103588_at   | 1438760_x_at | Adam15        | a disintegrin and metalloproteinase domain    | -1.46 | 0.01 | 1.06   | 0.7505 | -1.04 | 0.8254 | 1.07  | 0.7274 | 1.23  | 0.1413 |
| 103589_at   | 1448932_at   | Krt1-16       | keratin complex 1, acidic, gene 16            | 1.7   | 0.28 | 1.13   | 0.3083 | 1.01  | 0.9486 | 1.02  | 0.885  | 1.85  | 0.2183 |
| 103591_at   | 1418593_at   | Taf6          | TAF6 RNA polymerase II, TATA box binding      | -1.44 | 0.16 | 1.03   | 0.8496 | -1.1  | 0.593  | -1.21 | 0.3302 | -1.3  | 0.2589 |
| 103592_at   | 1417854_at   | Map2k5        | mitogen activated protein kinase kinase 5     | 1.25  | 0.33 | 1.03   | 0.5633 | 1.11  | 0.3857 | -1.01 | 0.8583 | -1.28 | 0.1838 |
| 103593_at   | 1456062_at   | Nppa          | natriuretic peptide precursor type A          | -1.15 | 0.67 | -1.03  | 0.749  | -1.01 | 0.8767 | -1.07 | 0.5135 | -1.08 | 0.5585 |
| 103595_at   | 1448915_at   | Zfp524        | zinc finger protein 524                       | 1.07  | 0.67 | 1.16   | 0.1888 | 1.1   | 0.2921 | 1.14  | 0.1733 | 1.31  | 0.359  |
| 103596_at   | 1418578_at   | Dgka          | diacylglycerol kinase, alpha                  | 1.58  | 0.15 | -1.2   | 0.1709 | -1.18 | 0.087  | -1.35 | 0.0398 | 1.08  | 0.8328 |
| 103597_at   | 1418028_at   | Dct           | dopachrome tautomerase                        | -1.6  | 0.31 | -12.95 | 0      | -1.88 | 0.0004 | -8.51 | 0      | -9.96 | 0      |
| 103598_at   | 1451770_s_at | ---           | ---                                           | 1.29  | 0.42 | 1.1    | 0.0551 | -1.15 | 0.0515 | -1    | 0.9514 | -1.02 | 0.914  |
| 103599_at   | 1451053_a_at | Mdm1          | transformed mouse 3T3 cell double minute 1    | -1.07 | 0.9  | 1.62   | 0.3119 | 1.08  | 0.8105 | 1.23  | 0.6686 | -1.04 | 0.9389 |
| 103600_at   | 1460223_a_at | Epb4.9        | erythrocyte protein band 4.9                  | -1.17 | 0.57 | -1.02  | 0.737  | 1.02  | 0.7379 | -1.21 | 0.0146 | 1.36  | 0.0111 |
| 103601_at   | 1436336_at   | 2210013M04Rik | RIKEN cDNA 2210013M04 gene                    | 1.05  | 0.68 | 1.17   | 0.5265 | -1.01 | 0.9333 | 1.25  | 0.3241 | 1.12  | 0.7238 |
| 103602_at   | 1420709_s_at | Dao1          | D-amino acid oxidase 1                        | -2.02 | 0.29 | -1.24  | 0.1972 | -1.34 | 0.007  | -1.25 | 0.1686 | -1.03 | 0.8657 |
| 103603_at   | 1460562_at   | Eftud1        | elongation factor Tu GTP binding domain co    | 5.11  | 0    | 1.02   | 0.8928 | -1.02 | 0.8668 | 1.15  | 0.1524 | 1.2   | 0.7084 |
| 103606_r_at | 1417786_a_at | Rgs19         | regulator of G-protein signaling 19           | -1.23 | 0.61 | 1.09   | 0.521  | 1.03  | 0.7828 | 1.26  | 0.1304 | 1.36  | 0.0802 |
| 103607_at   | 1417836_at   | Gpx7          | glutathione peroxidase 7                      | 1.71  | 0.25 | 1.03   | 0.934  | 1.18  | 0.5887 | 1.17  | 0.6521 | 1.21  | 0.5937 |
| 103608_at   | 1431354_a_at | Fars2         | phenylalanine-tRNA synthetase 2 (mitochon     | 1.3   | 0.08 | 1.02   | 0.7577 | 1.12  | 0.0438 | 1.15  | 0.0462 | -1.46 | 0.0006 |
| 103611_at   | 1419554_at   | Cd47          | CD47 antigen (Rh-related antigen, integrin-ε  | -1.24 | 0.45 | 1.2    | 0.0354 | 1.23  | 0.0537 | 1.38  | 0.0003 | 1.37  | 0.0191 |
| 103612_at   | 1418903_at   | Aqp2          | aquaporin 2                                   | -1.31 | 0.53 | 1.01   | 0.9371 | -1.01 | 0.9653 | 1.25  | 0.2942 | 1.05  | 0.8721 |
| 103613_at   | 1423498_at   | Aldoa-ps1     | aldolase 1, A isoform, pseudogene 1           | 2.67  | 0.05 | 1.72   | 0.0471 | 1.27  | 0.3243 | 1.15  | 0.6128 | 1.18  | 0.4023 |
| 103614_at   | 1425902_a_at | Nfkb2         | nuclear factor of kappa light polypeptide gen | 1.12  | 0.54 | 1.08   | 0.4557 | -1.16 | 0.2562 | 1.14  | 0.3294 | 1.08  | 0.0747 |
| 103617_at   | 1460242_at   | Daf1          | decay accelerating factor 1                   | -1.02 | 0.96 | 1.28   | 0.1405 | 1.43  | 0.1115 | 1.3   | 0.1983 | 2.07  | 0.014  |
| 103618_at   | 1428722_at   | Ckmt2         | creatine kinase, mitochondrial 2              | -2.5  | 0.08 | -4.37  | 0.1317 | -4.2  | 0.1377 | -5.56 | 0.1101 | 2.91  | 0.0131 |
| 103619_at   | 1417766_at   | 1810044O22Rik | RIKEN cDNA 1810044O22 gene                    | -1.14 | 0.33 | -1.17  | 0.0832 | -1.2  | 0.0737 | -1.38 | 0.0167 | -2.06 | 0.0032 |
| 103622_at   | 1449964_a_at | Mlycd         | malonyl-CoA decarboxylase                     | 1.04  | 0.65 | -1     | 0.9555 | 1.01  | 0.8959 | 1.1   | 0.2611 | 1.03  | 0.7192 |
| 103623_at   | 1422831_at   | Fbn2          | fibrillin 2                                   | 2.38  | 0.14 | 1.45   | 0.2233 | 1.3   | 0.3179 | 1.12  | 0.6463 | 1.44  | 0.2317 |
| 103624_at   | 1431753_x_at | 2900073H19Rik | RIKEN cDNA 2900073H19 gene                    | -1.21 | 0.29 | 1.13   | 0.3119 | -1.11 | 0.645  | -1.08 | 0.7396 | -1.27 | 0.5179 |
| 103625_at   | 1449045_at   | Afg3l1        | AFG3(ATPase family gene 3)-like 1 (yeast)     | 1.38  | 0.12 | -1.09  | 0.3436 | -1.02 | 0.859  | -1.05 | 0.5698 | -1.06 | 0.8361 |
| 103630_at   | 1448403_at   | ---           | ---                                           | 1.39  | 0.16 | 1.1    | 0.178  | 1.07  | 0.3665 | 1.17  | 0.0105 | -1.07 | 0.5687 |



|             |              |               |                                                 |       |      |       |        |       |        |       |        |       |        |
|-------------|--------------|---------------|-------------------------------------------------|-------|------|-------|--------|-------|--------|-------|--------|-------|--------|
| 103631_at   | 1452588_at   | 2810407K09Rik | RIKEN cDNA 2810407K09 gene                      | 1.64  | 0.13 | 1.35  | 0.0065 | 1.21  | 0.198  | 1.53  | 0.002  | 1.12  | 0.1679 |
| 103632_at   | 1429349_at   | 1700001F22Rik | RIKEN cDNA 1700001F22 gene                      | 3.7   | 0.02 | -1.5  | 0.1106 | -1.34 | 0.2264 | -1.79 | 0.0771 | -1.01 | 0.9786 |
| 103635_at   | 1424526_a_at | Tgds          | TDP-glucose 4,6-dehydratase                     | 1.1   | 0.67 | -1.09 | 0.1469 | 1.09  | 0.0784 | -1.21 | 0.0149 | -1.39 | 0.0313 |
| 103636_at   | 1418746_at   | MGI:1930773   | brain protein 17                                | -1.67 | 0.02 | -1.15 | 0.0656 | -1.34 | 0      | -1.66 | 0      | -1.57 | 0.0251 |
| 103637_at   | 1449043_at   | Naga          | N-acetyl galactosaminidase, alpha               | -1.16 | 0.72 | -1.09 | 0.1947 | -1.13 | 0.1545 | -1.19 | 0.0158 | -1.07 | 0.8496 |
| 103638_at   | 1426983_at   | Fnbp1         | Formin binding protein 1                        | 1.97  | 0.08 | 1.32  | 0.0721 | 1.04  | 0.782  | 1.27  | 0.2092 | 1.23  | 0.625  |
| 103639_at   | 1418293_at   | lfit2         | interferon-induced protein with tetratricopept  | 1.71  | 0.24 | 6.21  | 0.228  | 1.05  | 0.8826 | 8.96  | 0.1531 | 1.2   | 0.5863 |
| 103641_at   | 1455587_at   | BC030183      | cDNA sequence BC030183                          | 2.78  | 0.22 | 1.02  | 0.9257 | 1.69  | 0.0265 | 1.23  | 0.4971 | 4.03  | 0.0479 |
| 103643_at   | 1421115_a_at | Zdhhc16       | zinc finger, DHHC domain containing 16          | 1.34  | 0.29 | -1.09 | 0.3153 | 1.06  | 0.5366 | 1     | 0.9688 | -1.26 | 0.0906 |
| 103644_at   | 1435943_at   | Dpep1         | Dipeptidase 1 (renal)                           | 1.69  | 0.25 | -2.61 | 0.052  | -2.45 | 0.0614 | -2.9  | 0.0408 | -1.56 | 0.396  |
| 103645_at   | 1449223_at   | Dnajb8        | DnaJ (Hsp40) homolog, subfamily B, membe        | 1.24  | 0.6  | -1.07 | 0.7815 | -1.26 | 0.3804 | -1.36 | 0.195  | 1.02  | 0.9313 |
| 103646_at   | 1417008_at   | Crat          | carnitine acetyltransferase                     | 2.25  | 0.08 | 1.29  | 0.0478 | 1.17  | 0.2167 | 1.05  | 0.717  | 1.18  | 0.5344 |
| 103647_at   | 1416205_at   | Glb1          | galactosidase, beta 1                           | 1.85  | 0.2  | -1.12 | 0.6575 | 1.02  | 0.9379 | 1.05  | 0.8054 | -1.33 | 0.1981 |
| 103649_at   | 1418654_at   | Hao3          | hydroxyacid oxidase (glycolate oxidase) 3       | 11.44 | 0.01 | 1.05  | 0.7231 | -1.17 | 0.3749 | -1.74 | 0.0131 | 6.22  | 0.0007 |
| 103650_at   | 1416989_at   | 3100002B05Rik | RIKEN cDNA 3100002B05 gene                      | 1.38  | 0.4  | -1.07 | 0.2775 | -1.06 | 0.3855 | -1    | 0.9462 | -1.14 | 0.2052 |
| 103653_at   | 1449590_a_at | Mras          | muscle and microspikes RAS                      | -1.12 | 0.69 | 1.23  | 0.4411 | 1.05  | 0.7632 | 1.13  | 0.5691 | 1.22  | 0.2804 |
| 103654_at   | 1418152_at   | Nsbp1         | nucleosome binding protein 1                    | 1.2   | 0.5  | 1.2   | 0.0077 | 1.04  | 0.4374 | 1.15  | 0.0252 | -1.1  | 0.4812 |
| 103655_at   | 1426437_s_at | Hdac3         | histone deacetylase 3                           | 2.29  | 0.33 | 1.02  | 0.9079 | -1.43 | 0.1328 | -1.25 | 0.31   | -3.46 | 0.0167 |
| 103656_at   | 1427011_a_at | Lancl1        | LanC (bacterial lantibiotic synthetase compo    | -1.01 | 0.98 | -1    | 0.9919 | 1.09  | 0.2113 | 1.13  | 0.0209 | -1.13 | 0.4478 |
| 103658_r_at | 1418515_at   | Mtf2          | metal response element binding transcriptio     | 1.09  | 0.85 | 1.26  | 0.34   | 1.16  | 0.423  | 1.19  | 0.1468 | -1.12 | 0.596  |
| 103660_at   | 1449442_at   | Pex11a        | peroxisomal biogenesis factor 11a               | -1    | 0.99 | -1.17 | 0.2002 | -1.19 | 0.3981 | -1.48 | 0.0209 | -1.51 | 0.0485 |
| 103662_at   | 1418465_at   | Ncf4          | neutrophil cytosolic factor 4                   | 1.45  | 0.35 | 1.05  | 0.912  | -3.54 | 0.0008 | 1.3   | 0.6243 | 1.59  | 0.3087 |
| 103663_at   | 1426618_a_at | 4930467B06Rik | RIKEN cDNA 4930467B06 gene                      | 1.12  | 0.78 | 1.05  | 0.6204 | 1     | 0.98   | 1.19  | 0.2175 | 1.15  | 0.7671 |
| 103664_r_at | 1425830_a_at | 2810452K22Rik | RIKEN cDNA 2810452K22 gene                      | 1.33  | 0.33 | 1.15  | 0.0801 | 1.15  | 0.135  | 1.12  | 0.244  | 1.31  | 0.3103 |
| 103665_at   | 1417404_at   | Elov16        | ELOVL family member 6, elongation of long       | 1.02  | 0.96 | -5.3  | 0.002  | -3.2  | 0.0082 | -7.47 | 0.0012 | -3.5  | 0.002  |
| 103666_at   | 1418415_at   | Hoxb5         | homeo box B5                                    | -1.18 | 0.43 | 1.04  | 0.8215 | 1.27  | 0.0154 | -1    | 0.99   | 1.07  | 0.8542 |
| 103667_at   | 1434513_at   | Gm542         | gene model 542, (NCBI)                          | -1.15 | 0.32 | 1.06  | 0.3213 | 1.05  | 0.4931 | 1.1   | 0.0718 | -1.51 | 0.0034 |
| 103668_at   | 1417628_at   | Supt6h        | suppressor of Ty 6 homolog (S. cerevisiae)      | 1.3   | 0.25 | 1.14  | 0.047  | 1.18  | 0.0125 | 1.17  | 0.0298 | 1.65  | 0.0155 |
| 103669_at   | 1433798_a_at | E330034G19Ril | RIKEN cDNA E330034G19 gene                      | -2.58 | 0.02 | -1.05 | 0.6902 | 1.07  | 0.529  | -1.03 | 0.7476 | 1.43  | 0.0426 |
| 103670_at   | 1418821_at   | Cyp2a12       | cytochrome P450, family 2, subfamily a, pol     | 1.44  | 0.07 | 1.04  | 0.4151 | -1.05 | 0.27   | 1.15  | 0.0026 | 1.05  | 0.7004 |
| 103671_at   | 1451814_a_at | Htatip2       | HIV-1 tat interactive protein 2, homolog (hun   | 1.01  | 0.96 | -1.11 | 0.2705 | -1.13 | 0.0975 | -1.19 | 0.0361 | -1.15 | 0.4786 |
| 103672_at   | 1428997_at   | 2410141M05Ril | RIKEN cDNA 2410141M05 gene                      | -1.08 | 0.59 | 1.09  | 0.1883 | 1.17  | 0.0453 | -1.08 | 0.2682 | -1.08 | 0.5352 |
| 103673_at   | 1416051_at   | C2            | complement component 2 (within H-2S)            | 1.19  | 0.44 | 1.33  | 0.019  | -1.02 | 0.7258 | 1.42  | 0.0075 | 1.25  | 0.0721 |
| 103674_f_at | 1417210_at   | Eif2s3y       | eukaryotic translation initiation factor 2, sub | 1.44  | 0.24 | -2.64 | 0.0071 | -1.81 | 0.03   | -1.74 | 0.0442 | -1.11 | 0.5388 |
| 103675_at   | 1427231_at   | Robo1         | roundabout homolog 1 (Drosophila)               | 1.15  | 0.83 | 1.78  | 0.0733 | -2.15 | 0.1387 | 1.54  | 0.1474 | 2.8   | 0.003  |
| 103676_at   | 1448912_at   | C1qtnf1       | C1q and tumor necrosis factor related protei    | 1.67  | 0.46 | 1.16  | 0.5094 | 1.36  | 0.1615 | 1.04  | 0.8901 | 1.66  | 0.3345 |
| 103678_at   | 1434612_s_at | Sbno1         | sno, strawberry notch homolog 1 (Drosophila)    | 1.33  | 0.04 | 1.07  | 0.431  | 1.16  | 0.195  | 1.09  | 0.358  | 1.41  | 0.0872 |
| 103681_at   | 1434791_at   | Atp6v0a2      | ATPase, H+ transporting, lysosomal V0 sub       | 1.05  | 0.77 | 1.14  | 0.1286 | 1.04  | 0.5699 | 1.27  | 0.0189 | 1.08  | 0.5882 |
| 103682_at   | 1433913_at   | C80913        | expressed sequence C80913                       | 1.73  | 0.04 | 1.33  | 0.0507 | 1.3   | 0.2366 | 1.56  | 0.0053 | 1.2   | 0.3207 |
| 103683_at   | 1417582_s_at | Dhodh         | dihydroorotate dehydrogenase                    | 1.65  | 0.19 | -1.07 | 0.3114 | -1.03 | 0.7176 | -1.03 | 0.4795 | 1.11  | 0.7105 |
| 103684_at   | 1418484_at   | Tekt2         | tektin 2                                        | -1.16 | 0.52 | -1.72 | 0.2924 | 1.22  | 0.6677 | -1.07 | 0.8803 | 1.12  | 0.5839 |
| 103685_at   | 1436570_at   | ---           | Transcribed locus                               | 1.03  | 0.89 | -1.37 | 0.0107 | -1.01 | 0.9397 | -1.35 | 0.0111 | -1.29 | 0.1735 |
| 103689_at   | 1428988_at   | Abcc3         | ATP-binding cassette, sub-family C (CFTR/M      | 1.3   | 0.41 | 1.13  | 0.1987 | -1.08 | 0.3045 | 1.09  | 0.3188 | 1.33  | 0.0016 |
| 103691_at   | 1417888_at   | Trim13        | tripartite motif protein 13                     | -1.75 | 0.33 | 1.29  | 0.4986 | 1.05  | 0.8536 | 1.44  | 0.2605 | 1.43  | 0.4424 |
| 103692_at   | 1423085_at   | Efnb3         | ephrin B3                                       | -1.49 | 0.23 | 1     | 0.994  | -1.04 | 0.8512 | 1.07  | 0.7504 | -1.13 | 0.6192 |
| 103693_at   | 1457676_at   | C130027E04Ril | RIKEN cDNA C130027E04 gene                      | -1.4  | 0.17 | -1.37 | 0.0221 | -1.06 | 0.5872 | -1.3  | 0.045  | -1.37 | 0.2734 |
| 103694_at   | 1427047_at   | Nup188        | nucleoporin 188                                 | 1.07  | 0.68 | -1.06 | 0.7501 | -1.29 | 0.1739 | 1.08  | 0.7499 | 1.33  | 0.0877 |
| 103697_at   | 1454984_at   | AW061234      | expressed sequence AW061234                     | -1.42 | 0.1  | -3.41 | 0.0001 | -2.24 | 0.0009 | -3.26 | 0.0001 | -1.08 | 0.5843 |
| 103700_r_at | 1455220_at   | Frat2         | frequently rearranged in advanced T-cell lym    | -1.08 | 0.79 | -1.05 | 0.7953 | 1.08  | 0.656  | 1.21  | 0.3145 | 1.26  | 0.1704 |
| 103701_at   | 1427031_s_at | D16Ert480e    | DNA segment, Chr 16, ERATO Doi 480, exp         | -1.05 | 0.68 | -1.04 | 0.7234 | 1.05  | 0.7196 | 1.03  | 0.797  | 1.49  | 0.1771 |
| 103703_f_at | 1436162_at   | C730048C13Ril | RIKEN cDNA C730048C13 gene                      | -2.44 | 0    | -1.39 | 0.0001 | -1.01 | 0.8861 | -1.62 | 0      | -3.01 | 0.0081 |
| 103704_at   | 1435376_at   | Ddhd2         | DDHD domain containing 2                        | 1.31  | 0.29 | 1.15  | 0.1442 | 1.53  | 0.0036 | 1.31  | 0.0718 | -1.44 | 0.1483 |
| 103706_at   | 1435896_at   | Sfxn2         | sideroflexin 2                                  | 1.4   | 0.02 | 1.35  | 0.0001 | 1.28  | 0.0082 | 1.43  | 0      | 1.66  | 0.0007 |

|             |              |               |                                                 |       |      |       |        |       |        |       |        |       |        |
|-------------|--------------|---------------|-------------------------------------------------|-------|------|-------|--------|-------|--------|-------|--------|-------|--------|
| 103707_at   | 1419483_at   | C3ar1         | complement component 3a receptor 1              | -1.24 | 0.47 | -1.06 | 0.6401 | -1.11 | 0.1058 | 1.08  | 0.4969 | 1.15  | 0.5278 |
| 103708_at   | 1424344_s_at | Eif1a         | eukaryotic translation initiation factor 1A     | 1.02  | 0.86 | 1.15  | 0.201  | 1.01  | 0.933  | 1.3   | 0.0218 | -1.11 | 0.574  |
| 103709_at   | 1455494_at   | ---           | Transcribed locus                               | -1.25 | 0.33 | 1.01  | 0.9773 | -1.11 | 0.1758 | 1.21  | 0.2567 | 1.47  | 0.1822 |
| 103710_at   | 1455433_at   | 3110048L19Rik | RIKEN cDNA 3110048L19 gene                      | 1.72  | 0.05 | 1.2   | 0.2488 | 1.4   | 0.0232 | 1.2   | 0.248  | -1.03 | 0.8971 |
| 103711_at   | 1437537_at   | Casp9         | caspace 9                                       | 1.33  | 0.36 | -1    | 0.9746 | -1.14 | 0.1236 | -1.06 | 0.446  | -1.25 | 0.0158 |
| 103712_at   | 1433871_at   | R3hdm         | R3H domain (binds single-stranded nucleic ;     | -1.13 | 0.57 | 1.44  | 0.0234 | 1.7   | 0.0233 | 1.57  | 0.0022 | -1.4  | 0.3534 |
| 103713_at   | 1428193_at   | Usp9x         | ubiquitin specific protease 9, X chromosome     | -1.26 | 0.29 | 1.05  | 0.2999 | 1.03  | 0.5281 | 1.15  | 0.0345 | 1.07  | 0.6748 |
| 103714_at   | 1451547_at   | ---           | ---                                             | 1.2   | 0.25 | 1.01  | 0.9075 | 1.02  | 0.8994 | -1    | 0.9917 | -1.35 | 0.0245 |
| 103715_at   | 1450276_a_at | Scin          | scinderin                                       | 1.34  | 0.15 | -1.44 | 0.2112 | 1.05  | 0.8348 | -1.05 | 0.8671 | 1.2   | 0.4361 |
| 103716_at   | 1455072_at   | 4933409L06Rik | RIKEN cDNA 4933409L06 gene                      | 1.01  | 0.98 | -1.05 | 0.6384 | -1.01 | 0.9621 | -1.04 | 0.6925 | -1.14 | 0.3706 |
| 103717_at   | 1448146_at   | Wwp2          | WW domain containing E3 ubiquitin protein l     | 1.47  | 0.2  | -1.14 | 0.1184 | 1.02  | 0.7899 | -1.05 | 0.6524 | 1.28  | 0.2012 |
| 103718_at   | 1420645_at   | Rnf110        | ring finger protein 110                         | -1.9  | 0.41 | 1.35  | 0.0422 | 1.12  | 0.4996 | 1.53  | 0.0004 | 1.54  | 0.3216 |
| 103719_at   | 1449537_at   | Msh5          | mutS homolog 5 (E. coli)                        | -1.21 | 0.67 | 1.57  | 0.205  | -1.24 | 0.595  | 1.17  | 0.6495 | -1.05 | 0.8126 |
| 103720_at   | 1425565_at   | Rest          | RE1-silencing transcription factor              | 1.48  | 0.29 | 1.03  | 0.9016 | -1.9  | 0.0094 | -1.39 | 0.1337 | 1.38  | 0.0905 |
| 103721_at   | 1452107_s_at | Npnt          | nephronectin                                    | -1.22 | 0.58 | -1.26 | 0.0109 | -1.57 | 0.0007 | -1.16 | 0.1409 | -1.02 | 0.9598 |
| 103723_at   | 1454783_at   | Il13ra1       | interleukin 13 receptor, alpha 1                | -1.65 | 0.08 | -1.34 | 0.0025 | -1.15 | 0.2662 | -1.53 | 0      | -2.79 | 0.0172 |
| 103727_at   | 1434840_at   | Hrb           | HIV-1 Rev binding protein                       | 1.11  | 0.61 | -1    | 0.9741 | 1.17  | 0.0723 | 1.18  | 0.019  | 1.28  | 0.0031 |
| 103728_at   | 1456521_at   | ---           | Transcribed locus                               | 1.37  | 0.16 | 1.13  | 0.0104 | 1.13  | 0.05   | -1.01 | 0.8606 | 1.4   | 0.0094 |
| 103729_at   | 1418153_at   | Lama1         | laminin, alpha 1                                | 1.08  | 0.81 | -1.01 | 0.934  | -1.06 | 0.767  | -1.01 | 0.9412 | -1.44 | 0.1692 |
| 103731_at   | 1455252_at   | Tsc1          | Tuberous sclerosis 1                            | 1.14  | 0.45 | 1.23  | 0.0576 | 1.18  | 0.031  | 1.19  | 0.0382 | 1.49  | 0.0514 |
| 103732_at   | 1433941_at   | Pib5pa        | phosphatidylinositol (4,5) bisphosphate 5-ph    | -1.01 | 0.99 | 1.07  | 0.8005 | 1     | 0.9953 | 1.01  | 0.9595 | 1.06  | 0.5544 |
| 103733_at   | 1448019_at   | 2900006A08Rik | RIKEN cDNA 2900006A08 gene                      | -1.05 | 0.83 | -1.02 | 0.8032 | 1.25  | 0.0506 | 1.03  | 0.5822 | 1.73  | 0.0024 |
| 103734_at   | 1455177_at   | Ahi1          | Abelson helper integration site                 | 1.67  | 0.34 | -1.01 | 0.932  | -1.09 | 0.571  | -1.06 | 0.5906 | 1.21  | 0.558  |
| 103735_at   | 1419708_at   | Wnt6          | wingless-related MMTV integration site 6        | -2.53 | 0.25 | -1.06 | 0.7928 | 1.01  | 0.9455 | 1.11  | 0.6738 | 1.14  | 0.7363 |
| 103736_at   | 1448005_at   | Sash1         | SAM and SH3 domain containing 1                 | -1.19 | 0.37 | 1.09  | 0.3614 | 1.06  | 0.5886 | 1.17  | 0.0474 | 1.58  | 0.0115 |
| 103737_at   | 1418753_at   | ---           | ---                                             | -4.51 | 0.15 | 1.87  | 0.1245 | 1.57  | 0.2681 | 1.15  | 0.7371 | 1.14  | 0.7802 |
| 103738_at   | 1454820_at   | BC037034      | cDNA sequence BC037034                          | -1.82 | 0.24 | -1.18 | 0.0121 | -1.15 | 0.0854 | -1.13 | 0.0505 | 1.07  | 0.3877 |
| 103739_at   | 1428374_at   | MGI:2136405   | glucuronyl C5-epimerase                         | -1.28 | 0.1  | 1.01  | 0.9238 | 1.34  | 0.0731 | -1.06 | 0.6939 | 1.2   | 0.2146 |
| 103742_at   | 1449522_at   | Unc5c         | unc-5 homolog C (C. elegans)                    | -1.5  | 0.45 | 1.21  | 0.5522 | -1.28 | 0.3882 | 1.04  | 0.8893 | 2.78  | 0.1547 |
| 103743_at   | 1435106_at   | ---           | Transcribed locus                               | 2.4   | 0.02 | 1.28  | 0.1183 | 1.57  | 0.185  | 1.35  | 0.4355 | -1.41 | 0.4093 |
| 103744_at   | 1434109_at   | Sh3bgrl2      | SH3 domain binding glutamic acid-rich prote     | -1.14 | 0.49 | -1.01 | 0.9154 | 1.16  | 0.3774 | 1.12  | 0.3566 | -1.41 | 0.3112 |
| 103748_at   | 1427980_at   | 4933407C03Rik | RIKEN cDNA 4933407C03 gene                      | 2.19  | 0.29 | -1.01 | 0.9643 | -4.62 | 0.0031 | -3.36 | 0.0101 | -1.05 | 0.8994 |
| 103751_at   | 1452273_at   | AA409316      | expressed sequence AA409316                     | -1.18 | 0.48 | -1.2  | 0.0229 | -1.2  | 0.0429 | -1.3  | 0.0067 | -1.1  | 0.4782 |
| 103752_r_at | 1455156_at   | Strn          | striatin, calmodulin binding protein            | -1.13 | 0.53 | 1.28  | 0.2464 | 1.13  | 0.6951 | 1.09  | 0.6991 | 1.14  | 0.7352 |
| 103753_at   | 1434332_at   | Zzz3          | zinc finger, ZZ domain containing 3             | 1.42  | 0.26 | 1.35  | 0.003  | 1.28  | 0.0254 | 1.27  | 0.0157 | 1.56  | 0.2062 |
| 103754_at   | 1450859_s_at | Ube2d3        | ubiquitin-conjugating enzyme E2D 3 (UBC4/       | 1.21  | 0.33 | -1.07 | 0.4019 | -1.1  | 0.1416 | -1.2  | 0.042  | -1.36 | 0.0801 |
| 103755_at   | 1449084_s_at | Sh3d19        | SH3 domain protein D19                          | -1.34 | 0.43 | 1.04  | 0.6828 | -1.03 | 0.7361 | -1.01 | 0.8582 | -1.01 | 0.9346 |
| 103756_at   | 1435228_at   | BC023829      | cDNA sequence BC023829                          | 1.24  | 0.09 | 1.09  | 0.1527 | -1.03 | 0.629  | 1.1   | 0.1784 | 1.46  | 0.0011 |
| 103757_at   | 1440255_at   | AA589481      | expressed sequence AA589481                     | 1.18  | 0.52 | -1.35 | 0.0603 | -1.28 | 0.1464 | -1.26 | 0.1677 | 1.31  | 0.2578 |
| 103759_at   | 1449454_at   | Bst1          | bone marrow stromal cell antigen 1              | 1.53  | 0.43 | 1.17  | 0.5574 | -1.08 | 0.7846 | 1.11  | 0.6211 | 1.91  | 0.412  |
| 103760_at   | 1428798_s_at | 0610039J04Rik | RIKEN cDNA 0610039J04 gene                      | 1.63  | 0.2  | 1.13  | 0.2887 | 1.28  | 0.1012 | 1.4   | 0.0055 | -1.21 | 0.1285 |
| 103761_at   | 1418091_at   | Tcfcp2l1      | transcription factor CP2-like 1                 | -1.09 | 0.68 | -1.34 | 0.0051 | 1.05  | 0.6275 | -1.36 | 0.0044 | 1.07  | 0.6654 |
| 103762_at   | 1417698_at   | Gtf2f1        | general transcription factor IIF, polypeptide 1 | 1.05  | 0.76 | 1     | 0.9747 | -1.01 | 0.9305 | 1     | 0.9545 | 1.03  | 0.786  |
| 103763_at   | 1450072_at   | Ash1l         | ash1 (absent, small, or homeotic)-like (Dros    | 1.27  | 0.07 | 1.23  | 0.0203 | 1.25  | 0.0062 | 1.21  | 0.0183 | 1.06  | 0.6127 |
| 103765_at   | 1418200_at   | Hkr3          | GLI-Kruppel family member HKR3                  | 5.25  | 0.01 | 1.13  | 0.2355 | 1.13  | 0.171  | 1.23  | 0.1121 | 1.87  | 0.0821 |
| 103766_at   | 1422167_at   | Sema5a        | sema domain, seven thrombospondin repea         | -1.69 | 0.46 | -1.28 | 0.1374 | 1.29  | 0.0722 | 1.28  | 0.0411 | 2.49  | 0.0243 |
| 103767_f_at | 1433773_at   | Rrm2b         | ribonucleotide reductase M2 B (TP53 induci      | 1.48  | 0.21 | 1.14  | 0.6112 | -1.21 | 0.4966 | 1.14  | 0.6355 | 1.37  | 0.5953 |
| 103769_at   | 1421843_at   | Il1rap        | interleukin 1 receptor accessory protein        | -2.31 | 0.15 | 1     | 0.9968 | 1.31  | 0.3148 | -1.03 | 0.9259 | 1.07  | 0.8445 |
| 103770_at   | 1435572_at   | 2310014L17Rik | RIKEN cDNA 2310014L17 gene                      | -1.1  | 0.87 | -1.67 | 0.0499 | 1.15  | 0.452  | -1.11 | 0.5784 | 1.17  | 0.6644 |
| 103771_at   | 1435105_at   | 1110061N23Rik | RIKEN cDNA 1110061N23 gene                      | -1.67 | 0.11 | 1.05  | 0.3215 | -1.02 | 0.7247 | -1.07 | 0.2481 | 1.23  | 0.0492 |
| 103773_at   | 1439482_at   | ---           | ---                                             | -1.23 | 0.36 | 1.14  | 0.0746 | 1.17  | 0.0407 | 1.39  | 0.0001 | 1.08  | 0.5862 |
| 103774_at   | 1419867_a_at | Ankhd1        | ankyrin repeat and KH domain containing 1       | -1.15 | 0.69 | -1.03 | 0.8073 | -1.52 | 0.0041 | -1.22 | 0.1151 | 1.16  | 0.4698 |
| 103776_at   | 1442028_at   | Al593864      | expressed sequence Al593864                     | -3.08 | 0.24 | -1.05 | 0.7819 | 1.44  | 0.4204 | -1.12 | 0.5215 | 1.26  | 0.5252 |

|             |              |               |                                                 |       |      |       |        |       |        |       |        |       |        |
|-------------|--------------|---------------|-------------------------------------------------|-------|------|-------|--------|-------|--------|-------|--------|-------|--------|
| 103778_at   | 1448012_at   | C76336        | expressed sequence C76336                       | -2.32 | 0.35 | -1.2  | 0.5337 | -1.29 | 0.3936 | -1.12 | 0.6979 | -1    | 0.9948 |
| 103779_at   | 1434900_at   | ---           | ---                                             | 1.64  | 0.31 | 1.5   | 0.0413 | 1.43  | 0.1108 | 1.35  | 0.1044 | 1.65  | 0.089  |
| 103780_at   | 1421019_at   | 1700021F05Rik | RIKEN cDNA 1700021F05 gene                      | 1.77  | 0.04 | 1.19  | 0.1042 | 1.26  | 0.0833 | 1.28  | 0.0676 | -1    | 0.995  |
| 103781_at   | 1451573_a_at | Stx4a         | syntaxin 4A (placental)                         | 1.22  | 0.5  | -1.1  | 0.2692 | -1.08 | 0.3065 | -1.06 | 0.3267 | 1.13  | 0.5657 |
| 103782_at   | 1455677_s_at | ---           | ---                                             | -1.54 | 0.22 | -1.11 | 0.1782 | -1.07 | 0.2937 | -1.05 | 0.5987 | 1.42  | 0.1067 |
| 103783_at   | 1426992_at   | Xpr1          | xenotropic and polytropic retrovirus receptor   | -1.11 | 0.52 | -1.15 | 0.1954 | 1.12  | 0.429  | -1.19 | 0.1031 | -1.47 | 0.1328 |
| 103786_at   | 1435946_at   | ---           | ---                                             | 1.18  | 0.61 | -1.12 | 0.6343 | 1.08  | 0.7647 | -1.1  | 0.6858 | -2.8  | 0.0023 |
| 103787_at   | 1417416_at   | Kcna1         | potassium voltage-gated channel, shaker-re      | -1.72 | 0.04 | 1.14  | 0.1757 | 1.14  | 0.2337 | 1.03  | 0.7499 | 1.14  | 0.5705 |
| 103789_at   | 1424922_a_at | Brd4          | bromodomain containing 4                        | -1.24 | 0.8  | -1.25 | 0.5049 | -2.95 | 0.013  | -2.52 | 0.0404 | 1.13  | 0.6302 |
| 103790_at   | 1460742_at   | Alg3          | asparagine-linked glycosylation 3 homolog (     | -1.19 | 0.21 | -1.12 | 0.1326 | -1.02 | 0.8005 | -1.06 | 0.2145 | 1.1   | 0.385  |
| 103791_at   | 1418023_at   | Narg1         | NMDA receptor-regulated gene 1                  | 1.78  | 0.27 | 1.26  | 0.019  | 1.39  | 0.0627 | 1.19  | 0.1817 | -1.09 | 0.8615 |
| 103793_at   | 1448618_at   | Mvp           | major vault protein                             | 1.25  | 0.07 | -1.01 | 0.873  | 1.08  | 0.1411 | 1.06  | 0.5181 | 1.13  | 0.5117 |
| 103795_f_at | 1418766_s_at | Timd2         | T-cell immunoglobulin and mucin domain co       | -1.34 | 0.05 | -1.49 | 0.0009 | -1.07 | 0.5903 | -1.55 | 0.0006 | -1.8  | 0.0251 |
| 103796_at   | 1452870_at   | Apaf1         | apoptotic protease activating factor 1          | -1.34 | 0.4  | 1.14  | 0.3077 | 1.12  | 0.489  | 1.19  | 0.2643 | 1.08  | 0.761  |
| 103797_at   | 1426002_a_at | Cdc7          | cell division cycle 7 (S. cerevisiae)           | -1.33 | 0.58 | 1.44  | 0.3247 | 1.27  | 0.514  | 1.74  | 0.0295 | 2.72  | 0.0294 |
| 103799_at   | 1452254_at   | Mttr9         | myotubularin related protein 9                  | 1.13  | 0.64 | -1.09 | 0.2942 | -1.17 | 0.1413 | -1.23 | 0.0125 | 1.19  | 0.5583 |
| 103800_at   | 1438056_x_at | Abcc5         | ATP-binding cassette, sub-family C (CFTR/f      | -1.48 | 0    | -1.18 | 0.1174 | -1.23 | 0.1122 | -1.14 | 0.2751 | 1.26  | 0.1564 |
| 103801_at   | 1419310_s_at | Rfxank        | regulatory factor X-associated ankyrin-conta    | 1.04  | 0.89 | -1.13 | 0.0577 | -1.07 | 0.3271 | -1.14 | 0.0811 | 1.4   | 0.0035 |
| 103803_at   | 1419767_at   | Padi3         | peptidyl arginine deiminase, type III           | 1.15  | 0.71 | 1.12  | 0.6299 | 1.02  | 0.9641 | 1.17  | 0.5448 | 1.66  | 0.1259 |
| 103804_at   | 1450784_at   | ---           | ---                                             | 1.29  | 0.36 | -1.72 | 0.1186 | -1.29 | 0.3754 | -1.8  | 0.0823 | -2.21 | 0.0438 |
| 103805_at   | 1448746_at   | Nbn           | nibrin                                          | 1.72  | 0.21 | -1.04 | 0.6557 | 1.38  | 0.0108 | 1.11  | 0.3095 | -1.13 | 0.4003 |
| 103806_at   | 1449299_at   | Lrp5          | low density lipoprotein receptor-related prote  | 1.67  | 0.38 | -1.16 | 0.1596 | -1.13 | 0.1638 | -1.38 | 0.0022 | 1.1   | 0.8302 |
| 103807_at   | 1418202_a_at | Wiz           | widely-interspaced zinc finger motifs           | -1.48 | 0.02 | -1.07 | 0.3622 | -1.04 | 0.4179 | -1.14 | 0.0796 | 1.21  | 0.1953 |
| 103808_at   | 1418447_at   | Golga5        | golgi autoantigen, golgin subfamily a, 5        | -1.09 | 0.71 | 1.15  | 0.1708 | 1.41  | 0.0531 | 1.35  | 0.0089 | -1.27 | 0.4286 |
| 103809_r_at | 1416361_a_at | Dncic1        | dynein, cytoplasmic, intermediate chain 1       | -1.07 | 0.64 | 1.02  | 0.8233 | -1.03 | 0.7636 | 1.01  | 0.9545 | 1.33  | 0.0056 |
| 103810_at   | 1418158_at   | Trp63         | transformation related protein 63               | -1.11 | 0.87 | -1.1  | 0.2503 | 1.17  | 0.0133 | -1.12 | 0.2045 | 1.32  | 0.0981 |
| 103811_at   | 1419308_at   | Invs          | inversin                                        | -1.07 | 0.68 | -1.18 | 0.0922 | -1.2  | 0.2364 | -1.35 | 0.0144 | -1.37 | 0.3114 |
| 103812_at   | 1417852_x_at | Clca1         | chloride channel calcium activated 1            | 1.25  | 0.31 | 1.45  | 0.0018 | 1.18  | 0.0705 | 1.43  | 0.0003 | 1.66  | 0.0434 |
| 103813_at   | 1449579_at   | Sh3yl1        | Sh3 domain YSC-like 1                           | 1.06  | 0.8  | -1.19 | 0.0627 | -1.12 | 0.4754 | -1.29 | 0.025  | -1.33 | 0.4014 |
| 103814_at   | 1420460_a_at | Pex11b        | peroxisomal biogenesis factor 11b               | -1.2  | 0.42 | 1.03  | 0.6843 | 1.02  | 0.8532 | -1.06 | 0.4145 | -1.05 | 0.7806 |
| 103816_at   | 1424595_at   | F11r          | F11 receptor                                    | 1.23  | 0.22 | 1.1   | 0.4784 | 1.01  | 0.8891 | 1.16  | 0.1691 | 1.3   | 0.1957 |
| 103817_at   | 1448592_at   | Crtap         | cartilage associated protein                    | 1.15  | 0.54 | -1    | 0.96   | 1.02  | 0.7591 | -1.06 | 0.4351 | 1.37  | 0.1039 |
| 103818_at   | 1417392_a_at | Slc7a7        | solute carrier family 7 (cationic amino acid tr | 3.12  | 0.01 | 1.38  | 0.2308 | 1.11  | 0.687  | 1.95  | 0.0949 | -1.03 | 0.928  |
| 103819_at   | 1417486_at   | Shd           | src homology 2 domain-containing transforr      | -1.23 | 0.62 | 1.14  | 0.5678 | 1.17  | 0.4394 | 1.33  | 0.2024 | 2.21  | 0.1784 |
| 103821_at   | 1417019_a_at | Cdc6          | cell division cycle 6 homolog (S. cerevisiae)   | 1.47  | 0.33 | -1.13 | 0.0853 | -1.16 | 0.2486 | -1.1  | 0.3658 | -1.2  | 0.4919 |
| 103822_at   | 1428961_a_at | Sfrs16        | splicing factor, arginine/serine-rich 16 (suppl | -1.48 | 0.14 | 1.52  | 0.1122 | 2.09  | 0.0298 | 2.21  | 0.0151 | 1.83  | 0.1659 |
| 103823_at   | 1448173_a_at | Top3b         | topoisomerase (DNA) III beta                    | -1.19 | 0.22 | 1     | 0.9959 | 1.07  | 0.4897 | 1.01  | 0.8714 | -1    | 0.9916 |
| 103824_at   | 1448411_at   | Wfs1          | Wolfram syndrome 1 homolog (human)              | 1.19  | 0.69 | 1.36  | 0.3182 | 1.25  | 0.2741 | 1.24  | 0.6135 | 1.6   | 0.3292 |
| 103825_at   | 1422268_a_at | Rps6kb2       | ribosomal protein S6 kinase, polypeptide 2      | -2.18 | 0.21 | 1.16  | 0.6402 | 1.15  | 0.5982 | -1.42 | 0.2231 | 1.02  | 0.9685 |
| 103826_at   | 1450093_s_at | Zbtb7         | zinc finger and BTB domain containing 7         | 1.51  | 0.3  | -1.15 | 0.1961 | -1.3  | 0.0581 | -1.28 | 0.0225 | 1.15  | 0.5553 |
| 103829_at   | 1426491_at   | Herc2         | hect (homologous to the E6-AP (UBE3A) ca        | 1.24  | 0.23 | -1.28 | 0.0193 | -1.19 | 0.1445 | 1.1   | 0.4813 | -1.75 | 0.0974 |
| 103830_at   | 1448742_at   | Snai1         | snail homolog 1 (Drosophila)                    | -1.59 | 0.59 | 1.3   | 0.49   | 1.28  | 0.5367 | -1.11 | 0.7951 | 1.71  | 0.3268 |
| 103831_at   | 1416734_at   | Mkln1         | muskelin 1, intracellular mediator containing   | -1.29 | 0.61 | 1.02  | 0.9174 | -1.2  | 0.3111 | -1.2  | 0.284  | 1.25  | 0.5771 |
| 103832_at   | 1448976_at   | Trip11        | tuftelin interacting protein 11                 | 1.29  | 0.09 | 1.15  | 0.3021 | 1.19  | 0.1884 | 1.08  | 0.4416 | 1.29  | 0.065  |
| 103833_at   | 1448631_a_at | Hipk2         | homeodomain interacting protein kinase 2        | -1.32 | 0.68 | -1.21 | 0.2209 | -1.22 | 0.4289 | -1.92 | 0.0162 | -1.83 | 0.3125 |
| 103835_f_at | 1448812_at   | Hpcal1        | hippocalcin-like 1                              | -1.04 | 0.76 | 1.2   | 0      | 1.12  | 0.021  | 1.2   | 0.0511 | 1.29  | 0.1462 |
| 103836_at   | 1419375_at   | Wbp4          | WW domain binding protein 4                     | -1.04 | 0.81 | 1.28  | 0.1036 | 1.16  | 0.5298 | 1.35  | 0.2192 | 1.07  | 0.6538 |
| 103837_at   | 1418748_at   | Casp14        | caspase 14                                      | -2.09 | 0.21 | -1.04 | 0.7273 | -1.13 | 0.5265 | -1.14 | 0.4843 | 1.74  | 0.0363 |
| 103838_at   | 1449206_at   | Mg29          | mitsugumin 29                                   | -1.4  | 0.53 | -1.08 | 0.6774 | 1.21  | 0.287  | 1.13  | 0.4488 | 1.52  | 0.0979 |
| 103839_at   | 1451596_a_at | Sphk1         | sphingosine kinase 1                            | -1.14 | 0.69 | 1.03  | 0.7989 | 1.1   | 0.3069 | 1     | 0.9991 | 1.16  | 0.4554 |
| 103840_at   | 1448762_at   | Rad17         | RAD17 homolog (S. pombe)                        | 1.4   | 0.27 | 1.26  | 0.0151 | 1.35  | 0.0787 | 1.38  | 0.0022 | -1.2  | 0.3062 |
| 103841_at   | 1421030_at   | Zfp64         | zinc finger protein 64                          | -1.18 | 0.72 | 1.05  | 0.5499 | 1.09  | 0.6302 | 1.02  | 0.7986 | -1.01 | 0.9893 |
| 103842_at   | 1452077_at   | Ddx3y         | DEAD (Asp-Glu-Ala-Asp) box polypeptide 3,       | 1.16  | 0.63 | 1.69  | 0.4251 | -1.14 | 0.7993 | 1.57  | 0.3367 | -1.14 | 0.517  |

|             |              |               |                                                |       |      |       |        |       |        |       |        |       |        |
|-------------|--------------|---------------|------------------------------------------------|-------|------|-------|--------|-------|--------|-------|--------|-------|--------|
| 103844_at   | 1460383_at   | Gnao1         | guanine nucleotide binding protein, alpha o    | -1.22 | 0.3  | 1.1   | 0.4962 | 1.09  | 0.6068 | 1.03  | 0.7807 | 1.5   | 0.2963 |
| 103845_at   | 1433750_at   | Slc31a1       | solute carrier family 31, member 1             | -1.01 | 0.98 | -1.07 | 0.0509 | 1.04  | 0.3814 | -1.17 | 0      | -1.08 | 0.3352 |
| 103846_at   | 1422308_a_at | Lgals7        | lectin, galactose binding, soluble 7           | 1.71  | 0.04 | 1.08  | 0.5706 | 1.06  | 0.5988 | 1.11  | 0.2686 | 1.12  | 0.6827 |
| 103849_at   | 1421953_at   | Crkl          | v-crk sarcoma virus CT10 oncogene homolc       | 1.36  | 0.45 | -1.13 | 0.7348 | 1.11  | 0.7932 | -1.76 | 0.1164 | 1.37  | 0.5838 |
| 103850_at   | 1451978_at   | Lox1          | lysyl oxidase-like 1                           | -1.02 | 0.96 | 1.03  | 0.8173 | -1.12 | 0.3476 | -1.16 | 0.0929 | 1.23  | 0.3918 |
| 103852_at   | 1423958_a_at | 2900001O04Rik | RIKEN cDNA 2900001O04 gene                     | 1.39  | 0.15 | 1.13  | 0.2689 | 1.05  | 0.7456 | 1.16  | 0.1835 | -1.41 | 0.0036 |
| 103853_at   | 1452171_at   | Grwd1         | glutamate-rich WD repeat containing 1          | 1.89  | 0.12 | -1.12 | 0.3845 | 1.07  | 0.6391 | 1     | 0.9813 | 1.86  | 0.169  |
| 103854_at   | 1422549_at   | Arl2          | ADP-ribosylation factor-like 2                 | 1.48  | 0.34 | 1.01  | 0.9501 | 1.05  | 0.5796 | -1    | 0.9705 | 1.02  | 0.9597 |
| 103855_at   | 1419835_s_at | Plec1         | plectin 1                                      | 1.13  | 0.52 | 1.09  | 0.34   | 1.24  | 0.041  | 1.21  | 0.1004 | 1.38  | 0.0032 |
| 103858_at   | 1460548_a_at | Eral1         | Era (G-protein)-like 1 (E. coli)               | 1.06  | 0.68 | 1.04  | 0.3058 | 1.13  | 0.0353 | 1.08  | 0.107  | -1.14 | 0.0182 |
| 103862_r_at | 1448968_at   | D7Wsu128e     | DNA segment, Chr 7, Wayne State Universi       | -1.1  | 0.16 | -1.1  | 0.217  | 1.1   | 0.3251 | -1.14 | 0.1078 | 1.08  | 0.6123 |
| 103863_at   | 1460656_a_at | 5630401J11Rik | RIKEN cDNA 5630401J11 gene                     | -1.35 | 0.27 | 1.31  | 0.0068 | 1.13  | 0.4179 | 1.44  | 0.0152 | 1.07  | 0.7359 |
| 103865_at   | 1456598_at   | LOC434451     | similar to DNA segment, Chr 5, ERATO Doi       | 2.36  | 0.14 | -1.53 | 0.0146 | -1.18 | 0.3791 | -1.27 | 0.1546 | 1.42  | 0.1023 |
| 103866_at   | 1453281_at   | ---           | ---                                            | 1.54  | 0.33 | 2.23  | 0.1348 | 1.12  | 0.1608 | 2.38  | 0.1546 | 1.23  | 0.2781 |
| 103868_at   | 1448802_at   | Nufip1        | nuclear fragile X mental retardation protein i | 2.14  | 0.05 | 1.55  | 0.0235 | 1.55  | 0.0541 | 1.72  | 0.0031 | -1.8  | 0.1905 |
| 103869_at   | 1416623_at   | Thbs3         | thrombospondin 3                               | 1.23  | 0.67 | 1.07  | 0.8281 | -1.1  | 0.7865 | -1.21 | 0.5943 | -1.31 | 0.4879 |
| 103871_at   | 1433627_at   | Sec23ip       | Sec23 interacting protein                      | 2.88  | 0.05 | 1.54  | 0.0302 | 1.51  | 0.1275 | 1.63  | 0.0086 | 1.94  | 0.0817 |
| 103872_r_at | 1450741_at   | Stau1         | staufer (RNA binding protein) homolog 1 (D     | 1.25  | 0.15 | -1.04 | 0.7118 | 1.03  | 0.7788 | -1.03 | 0.7875 | 1.68  | 0.051  |
| 103874_r_at | 1428505_at   | 2310015N07Rik | RIKEN cDNA 2310015N07 gene                     | -1.26 | 0.18 | 1.57  | 0.1239 | 1.6   | 0.0948 | 1.59  | 0.156  | -1.28 | 0.5261 |
| 103875_at   | 1416709_a_at | AW552001      | expressed sequence AW552001                    | 1.47  | 0.16 | 1.25  | 0.0002 | 1.3   | 0.0009 | 1.26  | 0.0063 | 1.08  | 0.4541 |
| 103876_at   | 1417583_a_at | Criz1         | charged amino acid rich leucine zipper 1       | 1.01  | 0.98 | -1.03 | 0.5813 | 1.01  | 0.8558 | -1.05 | 0.3189 | -1.16 | 0.2847 |
| 103877_at   | 1460731_at   | Slc35c2       | solute carrier family 35, member C2            | 1.24  | 0.14 | -1.02 | 0.7035 | -1.01 | 0.9088 | -1.04 | 0.4473 | 1.38  | 0.0021 |
| 103878_at   | 1423235_at   | Ap3b1         | adaptor-related protein complex 3, beta 1 su   | 1.06  | 0.79 | -1.02 | 0.7465 | 1.05  | 0.5483 | 1.11  | 0.103  | 1.09  | 0.1541 |
| 103879_at   | 1451354_at   | BC024806      | cDNA sequence BC024806                         | -1.12 | 0.31 | -1.01 | 0.9198 | 1.1   | 0.2369 | 1.13  | 0.1047 | -1.02 | 0.9261 |
| 103881_at   | 1424488_a_at | 1110013G13Rik | RIKEN cDNA 1110013G13 gene                     | 1.48  | 0.03 | -1    | 0.9454 | 1.16  | 0.183  | 1.05  | 0.4735 | -1.59 | 0.0045 |
| 103882_at   | 1417745_at   | Cpn1          | carboxypeptidase N, polypeptide 1              | 1.1   | 0.74 | -1.12 | 0.0305 | -1.11 | 0.2553 | -1.34 | 0.0001 | -1.24 | 0.07   |
| 103884_at   | 1424682_at   | D5Erttd708e   | DNA segment, Chr 5, ERATO Doi 708, expr        | 2.32  | 0.08 | 1.2   | 0.0142 | 1.21  | 0.0656 | 1.17  | 0.1386 | 1.35  | 0.206  |
| 103885_at   | 1448633_at   | Prpf31        | PRP31 pre-mRNA processing factor 31 horr       | 1.64  | 0.25 | 1.18  | 0.3249 | 1.18  | 0.4297 | 1.3   | 0.1329 | 1.09  | 0.7661 |
| 103886_at   | 1426376_at   | Dp1           | deleted in polyposis 1                         | -1.01 | 0.97 | -1.08 | 0.3547 | 1.08  | 0.3632 | -1.23 | 0.1321 | 1.21  | 0.193  |
| 103887_at   | 1448756_at   | S100a9        | S100 calcium binding protein A9 (calgranulir   | 2.36  | 0.09 | 2.58  | 0.0266 | 1.12  | 0.7416 | 1.87  | 0.1571 | 3.94  | 0.0028 |
| 103888_at   | 1437161_x_at | Rbpms         | RNA binding protein gene with multiple splic   | 1.19  | 0.5  | 1.2   | 0.0214 | 1.38  | 0.0225 | 1.29  | 0.0009 | 1.43  | 0.0209 |
| 103889_at   | 1434839_s_at | Tbl1xr1       | transducin (beta)-like 1X-linked receptor 1    | 1.05  | 0.85 | 1.09  | 0.4124 | -1.17 | 0.2159 | 1.09  | 0.3577 | -1.12 | 0.5686 |
| 103890_at   | 1415866_at   | AW538196      | expressed sequence AW538196                    | 1.74  | 0.19 | -1.33 | 0.2625 | 1.02  | 0.9527 | 1.28  | 0.3477 | -1.04 | 0.5947 |
| 103892_r_at | 1450744_at   | Ell2          | elongation factor RNA polymerase II 2          | 1.38  | 0.14 | 1.09  | 0.4863 | 1.38  | 0.1184 | -1    | 0.9973 | -1.27 | 0.1357 |
| 103893_at   | 1452255_at   | Fbxo38        | F-box protein 38                               | -1.16 | 0.15 | 1.1   | 0.0786 | 1.09  | 0.1018 | 1.08  | 0.1391 | -1.11 | 0.4921 |
| 103894_at   | 1424174_at   | Shkbp1        | Sh3kbp1 binding protein 1                      | 1     | 0.99 | -1.19 | 0.0535 | -1.05 | 0.5858 | -1.18 | 0.1092 | -1.04 | 0.7503 |
| 103895_at   | 1426459_s_at | AW549877      | expressed sequence AW549877                    | -1.24 | 0.21 | -1.05 | 0.721  | 1.22  | 0.173  | -1    | 0.9597 | 1.19  | 0.0917 |
| 103896_f_at | 1418918_at   | Igfbp1        | insulin-like growth factor binding protein 1   | 3.25  | 0.06 | 11.33 | 0.0006 | 1.71  | 0.3508 | 18.87 | 0      | 36.97 | 0.011  |
| 103899_at   | 1456388_at   | Atp11a        | ATPase, class VI, type 11A                     | 4.69  | 0.04 | 1.23  | 0.3428 | -1.25 | 0.2314 | 1.11  | 0.4204 | -3.12 | 0.063  |
| 103900_at   | 1423910_at   | Centg3        | centaurin, gamma 3                             | 1.38  | 0.18 | -1.32 | 0.0214 | 1.02  | 0.8662 | -1.2  | 0.0577 | 1.23  | 0.4873 |
| 103901_at   | 1426899_at   | 4930451A13Rik | RIKEN cDNA 4930451A13 gene                     | 1.04  | 0.84 | 1.05  | 0.4348 | 1.08  | 0.5609 | 1.04  | 0.513  | 1.58  | 0.0082 |
| 103903_at   | 1433881_at   | Dnajc11       | DnaJ (Hsp40) homolog, subfamily C, memb-       | 1.38  | 0.51 | 1.48  | 0.2384 | 1.37  | 0.2201 | 1.11  | 0.7156 | 1.23  | 0.0232 |
| 103904_at   | 1417933_at   | Igfbp6        | insulin-like growth factor binding protein 6   | -1.27 | 0.52 | -1.11 | 0.4798 | -1.12 | 0.2791 | 1.02  | 0.9415 | 1.11  | 0.2279 |
| 103905_at   | 1428485_at   | Car12         | carbonic anhydrase 12                          | 1.39  | 0.4  | 1.06  | 0.786  | -1.26 | 0.4044 | 1.16  | 0.4225 | 1.35  | 0.2342 |
| 103907_at   | 1423269_a_at | Nedd4l        | neural precursor cell expressed, developme     | -1.57 | 0.32 | -1    | 0.9967 | -1.25 | 0.075  | -1.03 | 0.7978 | 1.01  | 0.9683 |
| 103908_at   | 1453195_at   | C330016H24Rik | RIKEN cDNA C330016H24 gene                     | -1.27 | 0.5  | 1.13  | 0.1491 | 1.05  | 0.5762 | 1.14  | 0.1055 | -1.42 | 0.2804 |
| 103909_at   | 1448615_at   | Ccs           | copper chaperone for superoxide dismutase      | 1.11  | 0.84 | -1.22 | 0.0008 | -1.15 | 0.1245 | -1.44 | 0      | -1.72 | 0.0667 |
| 103910_at   | 1448784_at   | Taf10         | TAF10 RNA polymerase II, TATA box bindin       | 1.04  | 0.84 | 1.03  | 0.5661 | 1.17  | 0.0986 | 1.09  | 0.1763 | -1.5  | 0.1223 |
| 103911_at   | 1424604_s_at | Sumf1         | sulfatase modifying factor 1                   | 1.01  | 0.99 | -1.11 | 0.3524 | 1.11  | 0.5274 | 1.02  | 0.8675 | -1.35 | 0.2568 |
| 103912_at   | 1428265_at   | Ppp2r1b       | protein phosphatase 2 (formerly 2A), regulat   | -1.45 | 0.15 | -1.38 | 0.0805 | -1.11 | 0.5071 | -1.29 | 0.0766 | 1.25  | 0.6185 |
| 103913_at   | 1449944_a_at | Sec61a2       | Sec61, alpha subunit 2 (S. cerevisiae)         | -1.13 | 0.23 | 1.22  | 0.0026 | 1.32  | 0.0047 | 1.2   | 0.0214 | 1.15  | 0.5391 |
| 103914_at   | 1420493_a_at | Pcyt2         | phosphate cytidylyltransferase 2, ethanolam    | -1.18 | 0.39 | -1.14 | 0.0626 | -1.01 | 0.9415 | -1.15 | 0.0378 | -1.22 | 0.3312 |
| 103916_at   | 1426436_at   | 8430420C20Rik | RIKEN cDNA 8430420C20 gene                     | 1.76  | 0.13 | 1.08  | 0.5895 | 1.2   | 0.1868 | 1.18  | 0.3455 | 1.16  | 0.6611 |

|             |              |               |                                                |       |      |       |        |       |        |       |        |       |        |
|-------------|--------------|---------------|------------------------------------------------|-------|------|-------|--------|-------|--------|-------|--------|-------|--------|
| 103918_at   | 1424730_a_at | Slc15a2       | solute carrier family 15 (H+/peptide transpor  | -2.42 | 0.09 | -1.31 | 0.3086 | 1.34  | 0.0922 | -1.03 | 0.8915 | 1.36  | 0.3952 |
| 103922_f_at | 1424048_a_at | Nqo3a2        | NAD(P)H:quinone oxidoreductase type 3, pc      | 1.17  | 0.53 | 1.16  | 0.2597 | 1.68  | 0.0181 | 1.78  | 0.0004 | 1.52  | 0.1078 |
| 103924_at   | 1434287_at   | Agpat5        | 1-acylglycerol-3-phosphate O-acyltransferas    | -1.08 | 0.57 | -1.15 | 0.0135 | -1.11 | 0.0904 | -1.17 | 0.0625 | 1.37  | 0.0662 |
| 103925_at   | 1431890_a_at | Mllt3         | myeloid/lymphoid or mixed lineage-leukemia     | 1.13  | 0.75 | -2.64 | 0.0001 | 1.12  | 0.4312 | -3.66 | 0      | 1.17  | 0.5632 |
| 103927_at   | 1435091_at   | C80731        | expressed sequence C80731                      | 1.3   | 0.36 | 1.08  | 0.3872 | 1.13  | 0.2494 | 1.07  | 0.3489 | -1    | 0.9966 |
| 103931_at   | 1418611_at   | Grca          | gene rich cluster, A gene                      | -1.04 | 0.79 | -1.17 | 0.5249 | 1.08  | 0.7661 | -1.29 | 0.3612 | 1.58  | 0.1951 |
| 103932_at   | 1435442_at   | Gm83          | gene model 83, (NCBI)                          | 1.94  | 0.05 | 1.42  | 0.0001 | 1.54  | 0.0049 | 1.56  | 0      | 1.36  | 0.0303 |
| 103934_at   | 1424338_at   | Slc6a13       | solute carrier family 6 (neurotransmitter tran | -1.74 | 0.08 | -1.15 | 0.0471 | 1.19  | 0.0818 | -1.24 | 0.0006 | -1.49 | 0.0095 |
| 103935_at   | 1421129_a_at | Atp2a3        | ATPase, Ca++ transporting, ubiquitous          | -1.19 | 0.32 | 1.19  | 0.0683 | 1.06  | 0.8112 | 1.07  | 0.5343 | 1.49  | 0.0972 |
| 103939_at   | 1451512_s_at | Hibch         | 3-hydroxyisobutyryl-Coenzyme A hydrolase       | 2.18  | 0.02 | 1.05  | 0.5866 | 1.24  | 0.213  | 1.06  | 0.506  | -1.08 | 0.5659 |
| 103941_at   | 1421278_s_at | ---           | ---                                            | -1.75 | 0.06 | 1.02  | 0.9473 | 1.05  | 0.8312 | -1.47 | 0.1379 | 2.31  | 0.2895 |
| 103942_at   | 1436370_at   | Gucy2c        | guanylate cyclase 2c                           | 3.94  | 0.2  | 1.91  | 0.0523 | 1.93  | 0.0723 | 2.33  | 0.008  | 8.52  | 0.0009 |
| 103943_at   | 1452846_at   | Ppfia4        | protein tyrosine phosphatase, receptor type,   | -2.26 | 0.01 | -1.39 | 0.0148 | -1.02 | 0.8634 | 1.07  | 0.8184 | 1.64  | 0.0843 |
| 103944_at   | 1421430_at   | Rad5111       | RAD51-like 1 (S. cerevisiae)                   | 1.02  | 0.96 | 1.09  | 0.4522 | 1.57  | 0.0003 | -1.01 | 0.9468 | 1.41  | 0.2793 |
| 103945_at   | 1421524_at   | Cfc1          | cripto, FRL-1, cryptic family 1                | 1.06  | 0.89 | -1.22 | 0.3789 | 1.26  | 0.3921 | -1.11 | 0.6542 | 1.68  | 0.1354 |
| 103946_at   | 1424560_at   | Pstpip1       | proline-serine-threonine phosphatase-intera    | 1     | 0.99 | 2.03  | 0.0115 | 1.18  | 0.6163 | 1.77  | 0.1476 | 1.87  | 0.1069 |
| 103947_at   | 1424347_at   | Ppp6c         | protein phosphatase 6, catalytic subunit       | 1.19  | 0.25 | 1.07  | 0.2366 | 1.05  | 0.6018 | 1.13  | 0.1017 | 1.06  | 0.5811 |
| 103949_at   | 1450704_at   | lh            | Indian hedgehog                                | -1.01 | 0.94 | 1.06  | 0.4693 | 1.17  | 0.0679 | -1.04 | 0.6098 | -1.07 | 0.7843 |
| 103950_at   | 1452448_at   | Aqr           | aquarius                                       | -2.31 | 0.4  | -1.09 | 0.7431 | -1.41 | 0.2571 | 1.03  | 0.9129 | -1.79 | 0.2856 |
| 103952_at   | 1452317_at   | Hoxb9         | Homeo box B9                                   | -2.47 | 0.17 | -1.16 | 0.3371 | -1.05 | 0.7777 | -1.28 | 0.1815 | 1.21  | 0.1487 |
| 103953_at   | 1449063_at   | Sec2211       | SEC22 vesicle trafficking protein-like 1 (S. c | 1.16  | 0.71 | -1.07 | 0.4951 | 1     | 0.994  | -1.01 | 0.9206 | -1.04 | 0.8676 |
| 103954_at   | 1449495_at   | Reg3a         | regenerating islet-derived 3 alpha             | -1.66 | 0.14 | -1.16 | 0.1573 | 1.14  | 0.176  | 1.02  | 0.8701 | 1.05  | 0.8392 |
| 103955_at   | 1416795_at   | Cryl1         | crystallin, lamda 1                            | -1.38 | 0.2  | -1.16 | 0.0311 | 1.2   | 0.0247 | -1.16 | 0.1911 | -1.77 | 0.0141 |
| 103956_at   | 1419216_at   | Azi1          | 5-azacytidine induced gene 1                   | -1.04 | 0.92 | 1.49  | 0.0619 | 1.56  | 0.0181 | 1.35  | 0.0544 | -1.12 | 0.6457 |
| 103958_g_at | 1422966_a_at | Tfrc          | transferrin receptor                           | -1.33 | 0.13 | -1.79 | 0.0149 | -1.17 | 0.4271 | -1.15 | 0.4889 | -1.02 | 0.9542 |
| 103959_at   | 1455175_at   | Phf13         | PHD finger protein 13                          | 1.06  | 0.77 | 1.54  | 0.0023 | 1.27  | 0.1332 | 1.46  | 0.0064 | 1.45  | 0.0389 |
| 103960_at   | 1449246_at   | Rap2ip        | Rap2 interacting protein                       | -1.01 | 0.97 | -2.11 | 0.0006 | 1.06  | 0.6907 | -1.77 | 0.0033 | -1.47 | 0.2352 |
| 103962_at   | 1450545_a_at | Dntt          | deoxynucleotidyltransferase, terminal          | -1.1  | 0.86 | -5.11 | 0.0026 | -2.74 | 0.0151 | -3.8  | 0.0053 | 1.11  | 0.772  |
| 103963_f_at | 1419042_at   | ligp1         | interferon inducible GTPase 1                  | -3.02 | 0    | 1.16  | 0.7637 | -1.54 | 0.027  | 1.37  | 0.5366 | -2.87 | 0.0101 |
| 103964_at   | 1460652_at   | Esrra         | Estrogen related receptor, alpha               | -1.21 | 0.28 | 1.1   | 0.1475 | 1.07  | 0.5916 | 1.2   | 0.0575 | 1.2   | 0.2724 |
| 103965_at   | 1460433_at   | Entpd6        | ectonucleoside triphosphate diphosphohydr      | -1.03 | 0.85 | -1.47 | 0.0055 | -1.19 | 0.0699 | -1.26 | 0.0313 | 1.07  | 0.8273 |
| 103968_at   | 1422216_at   | Mid2          | midline 2                                      | 1.01  | 0.98 | 1.32  | 0.1677 | -1    | 0.9795 | 1.29  | 0.1234 | -1.05 | 0.9089 |
| 103969_at   | 1434704_at   | ---           | ---                                            | 1.07  | 0.45 | 1.18  | 0.0617 | 1.13  | 0.3255 | 1.16  | 0.0243 | 1.27  | 0.188  |
| 103970_at   | 1423526_at   | Arid3b        | AT rich interactive domain 3B (Bright like)    | -1.17 | 0.57 | 1.05  | 0.6823 | 1.04  | 0.6704 | -1.03 | 0.8518 | 1.41  | 0.339  |
| 103971_at   | 1460719_a_at | P2rx1         | purinergic receptor P2X, ligand-gated ion ch   | -1.26 | 0    | -1.4  | 0.0199 | -1.4  | 0.0069 | -1.48 | 0.0034 | 1.08  | 0.6645 |
| 103972_at   | 1418614_at   | Kcnj1         | potassium inwardly-rectifying channel, subfa   | -1.59 | 0.19 | -1    | 0.9753 | 1.12  | 0.304  | 1.3   | 0.1782 | 1.28  | 0.3958 |
| 103973_at   | 1418613_at   | Kcnj1         | potassium inwardly-rectifying channel, subfa   | 1.06  | 0.92 | -1.16 | 0.4857 | -1.34 | 0.1591 | -1.46 | 0.0715 | 1.57  | 0.457  |
| 103974_at   | 1419154_at   | Tmprss2       | transmembrane protease, serine 2               | 1.27  | 0.46 | -1.37 | 0.0183 | -1.09 | 0.5399 | -1.52 | 0.0213 | 1.32  | 0.1052 |
| 103975_at   | 1418492_at   | Grem2         | gremlin 2 homolog, cysteine knot superfamil    | 2.89  | 0    | 2.63  | 0.0158 | 3.04  | 0.0011 | 5.66  | 0      | 9.29  | 0      |
| 103976_at   | 1449605_at   | ---           | Transcribed locus                              | -1.07 | 0.85 | 1.8   | 0.0728 | -1.26 | 0.3594 | 1.43  | 0.2734 | 2.26  | 0.3297 |
| 103977_at   | 1449305_at   | F10           | coagulation factor X                           | 1.26  | 0.47 | -1.27 | 0      | -1.03 | 0.2106 | -1.27 | 0      | -1.2  | 0.0705 |
| 103978_at   | 1426361_at   | 5730454B08Rik | RIKEN cDNA 5730454B08 gene                     | -1.1  | 0.86 | 1.05  | 0.3356 | 1.03  | 0.7574 | -1.04 | 0.6817 | 1.15  | 0.2084 |
| 103980_at   | 1421151_a_at | Epha2         | Eph receptor A2                                | -1.26 | 0.13 | 1.1   | 0.5563 | -1.04 | 0.6957 | -1.05 | 0.6052 | -1.09 | 0.7407 |
| 103981_at   | 1455727_at   | U2af1-rs2     | U2 small nuclear ribonucleoprotein auxiliary   | -1.11 | 0.78 | -1.09 | 0.5041 | -1.04 | 0.8068 | -1.12 | 0.3919 | -1.16 | 0.5786 |
| 103983_at   | 1422070_at   | Adh4          | alcohol dehydrogenase 4 (class II), pi polype  | 1.33  | 0.33 | 1.29  | 0.0069 | 1.21  | 0.1313 | 1.4   | 0.001  | -1.54 | 0.0471 |
| 103984_at   | 1419820_at   | Pkhd1         | polycystic kidney and hepatic disease 1        | 1.86  | 0.3  | 1.14  | 0.6169 | -1.16 | 0.6481 | -1.56 | 0.1272 | -2.05 | 0.1782 |
| 103985_at   | 1450244_a_at | Map4k2        | mitogen activated protein kinase kinase kina   | 1.01  | 0.98 | 1.5   | 0.0337 | 1.14  | 0.4077 | 1.27  | 0.0803 | 1.11  | 0.6141 |
| 103986_at   | 1422001_at   | Inhbc         | inhibin beta-C                                 | -1.54 | 0.03 | -1    | 0.9878 | 1.05  | 0.607  | -1.14 | 0.1926 | -1.12 | 0.3631 |
| 103987_at   | 1448768_at   | Mog           | myelin oligodendrocyte glycoprotein            | -1.24 | 0.48 | 1.81  | 0.163  | 1.3   | 0.4641 | -1.05 | 0.5909 | 1.11  | 0.6239 |
| 103988_at   | 1426843_at   | BC023754      | cDNA sequence BC023754                         | 1.12  | 0.37 | -1.04 | 0.6522 | 1.08  | 0.5952 | 1.11  | 0.0648 | 1.08  | 0.4995 |
| 103989_at   | 1432057_a_at | Prdm5         | PR domain containing 5                         | 1.26  | 0.73 | -1.06 | 0.8235 | -1.03 | 0.9324 | -1.11 | 0.6772 | 1.81  | 0.2458 |
| 103990_at   | 1422134_at   | Fosb          | FBJ osteosarcoma oncogene B                    | -1.5  | 0.01 | -1.09 | 0.4241 | -1.09 | 0.4155 | -1.18 | 0.186  | 1.28  | 0.0229 |
| 103991_at   | 1450636_s_at | Akp5          | alkaline phosphatase 5                         | -1.36 | 0.17 | 1.01  | 0.9581 | 1.02  | 0.8096 | -1.02 | 0.859  | 1.51  | 0.0442 |

|           |              |               |                                                |       |      |       |        |       |        |       |        |       |        |
|-----------|--------------|---------------|------------------------------------------------|-------|------|-------|--------|-------|--------|-------|--------|-------|--------|
| 103993_at | 1451585_x_at | Grccl9        | gene rich cluster, C9 gene                     | -1.23 | 0.22 | -1.19 | 0.1999 | 1.06  | 0.5299 | -1.19 | 0.1269 | 1.19  | 0.5982 |
| 103994_at | 1426366_at   | Eif2c2        | eukaryotic translation initiation factor 2C, 2 | 1.47  | 0.22 | 1.19  | 0.4857 | -1.11 | 0.6791 | -1.03 | 0.8687 | 1.91  | 0.0086 |
| 103995_at | 1419086_at   | Fgfbp1        | fibroblast growth factor binding protein 1     | -1.99 | 0.2  | 1.11  | 0.4563 | 1.42  | 0.293  | 1.57  | 0.2544 | 1.33  | 0.3888 |
| 103997_at | 1423344_at   | Epor          | erythropoietin receptor                        | 1.66  | 0.11 | -1.06 | 0.7978 | 1.24  | 0.2018 | 1.04  | 0.8139 | 1.75  | 0.1536 |
| 103998_at | 1429063_s_at | Kif16b        | kinesin family member 16B                      | 1.49  | 0.02 | 1.21  | 0.0558 | 1.39  | 0.0099 | 1.17  | 0.1131 | -1.44 | 0.3471 |
| 103999_at | 1455326_at   | 4932416N17Rik | RIKEN cDNA 4932416N17 gene                     | 1.11  | 0.63 | -1.26 | 0.0009 | -1.16 | 0.0279 | -1.19 | 0.0247 | -2    | 0.0231 |
| 104000_at | 1424968_at   | 2210023G05Rik | RIKEN cDNA 2210023G05 gene                     | -1.65 | 0.11 | -1.2  | 0.0504 | 1.17  | 0.2165 | -1.04 | 0.6293 | -1.23 | 0.3246 |
| 104002_at | 1418397_at   | Zfp275        | Zinc finger protein 275                        | 1.19  | 0.31 | 1.11  | 0.1096 | 1.07  | 0.3729 | 1.22  | 0.0163 | 1.58  | 0.1472 |
| 104003_at | 1434518_at   | Phka2         | phosphorylase kinase alpha 2                   | 2.37  | 0.16 | 1.01  | 0.9365 | 1.15  | 0.3182 | 1.4   | 0.0029 | 1.03  | 0.9248 |
| 104004_at | 1428875_at   | Golph4        | golgi phosphoprotein 4                         | 1.49  | 0.19 | 1.23  | 0.0909 | 1.15  | 0.4289 | 1.35  | 0.0061 | 1.27  | 0.146  |
| 104006_at | 1419251_at   | Eps15         | epidermal growth factor receptor pathway su    | -1.72 | 0.34 | 1.02  | 0.9324 | 1.53  | 0.0042 | 1.32  | 0.2736 | -1.95 | 0.2452 |
| 104007_at | 1420967_at   | Slc25a15      | solute carrier family 25 (mitochondrial carrie | 1.4   | 0.25 | -1.28 | 0.0001 | -1.34 | 0.0002 | -1.49 | 0      | -1.79 | 0.0404 |
| 104008_at | 1450220_a_at | Spdef         | SAM pointed domain containing ets transcrip    | -1.58 | 0.65 | 1.01  | 0.9532 | 1.52  | 0.3931 | 1.04  | 0.8919 | 1.9   | 0.3453 |
| 104010_at | 1418607_at   | Zfp99         | zinc finger protein 99                         | -1.08 | 0.72 | -1.1  | 0.5549 | 1.1   | 0.4174 | 1.27  | 0.0383 | 1.7   | 0.0834 |
| 104011_at | 1419435_at   | Aox1          | aldehyde oxidase 1                             | -1.16 | 0.74 | 1.43  | 0.0147 | 1.21  | 0.2219 | 1.14  | 0.2821 | -2.44 | 0.0001 |
| 104012_at | 1427694_at   | Gnrhr         | gonadotropin releasing hormone receptor        | -1.39 | 0.35 | -1.3  | 0.1335 | 1.7   | 0.1701 | -1.08 | 0.6882 | -1.42 | 0.1355 |
| 104013_at | 1427731_at   | Gnrhr         | Gonadotropin releasing hormone receptor        | -1.69 | 0.08 | -1.45 | 0.2137 | -1.32 | 0.3198 | -1.16 | 0.6706 | 1.17  | 0.4351 |
| 104014_at | 1422645_at   | Hfe           | hemochromatosis                                | 1.43  | 0.2  | -1.09 | 0.0802 | -1    | 0.9535 | -1.12 | 0.0219 | -2.31 | 0.0005 |
| 104015_at | 1426836_s_at | Metap1        | methionyl aminopeptidase 1                     | -1.06 | 0.6  | 1.06  | 0.3488 | -1.01 | 0.9163 | 1.04  | 0.624  | -1.06 | 0.5218 |
| 104016_at | 1449204_at   | Gjb5          | gap junction membrane channel protein bet      | -1.65 | 0.37 | -1.25 | 0.0889 | -1.06 | 0.6091 | -1.29 | 0.0565 | -1.35 | 0.2134 |
| 104017_at | 1451828_a_at | Acsl4         | acyl-CoA synthetase long-chain family mem      | 1.76  | 0.14 | 1.11  | 0.5515 | 1.12  | 0.468  | 1.41  | 0.1903 | 1.26  | 0.4074 |
| 104018_at | 1439479_at   | Lct           | lactase                                        | -1.43 | 0.14 | -1.06 | 0.6674 | 1.07  | 0.7082 | 1.15  | 0.4603 | 1.52  | 0.1277 |
| 104019_at | 1424539_at   | ---           | ---                                            | 2.3   | 0.13 | -1.1  | 0.2307 | -1.07 | 0.4877 | -1.01 | 0.8755 | 1.36  | 0.4068 |
| 104020_at | 1448885_at   | Rap2b         | RAP2B, member of RAS oncogene family           | -1.89 | 0.07 | -1.16 | 0.1936 | -1.11 | 0.3758 | -1.21 | 0.0971 | 1.2   | 0.3522 |
| 104021_at | 1420414_at   | Hoxa11        | homeo box A11                                  | 1.22  | 0.82 | 1.52  | 0.3161 | -1.22 | 0.5639 | 1.3   | 0.4733 | 2.61  | 0.0469 |
| 104022_at | 1429080_at   | Mphosph10     | M-phase phosphoprotein 10 (U3 small nucle      | 4.47  | 0.05 | 2.24  | 0.1114 | 2.51  | 0.0523 | 2.73  | 0.0326 | -1    | 0.9962 |
| 104023_at | 1428018_a_at | Cd300c        | Cd300C antigen                                 | 1.04  | 0.89 | 1.08  | 0.6056 | -1.16 | 0.2303 | 1.19  | 0.528  | 1.6   | 0.0093 |
| 104024_at | 1424973_at   | Cyp3a25       | cytochrome P450, family 3, subfamily a, pol    | 1.77  | 0.15 | 1.51  | 0.0019 | 1.12  | 0.1377 | 1.74  | 0      | -1.05 | 0.599  |
| 104025_at | 1448907_at   | Thop1         | thimet oligopeptidase 1                        | 1.62  | 0.13 | -1.47 | 0.1527 | 1.14  | 0.6585 | 1.22  | 0.3659 | 1.38  | 0.2583 |
| 104029_at | 1430240_a_at | Clgn          | calmegin                                       | -1.43 | 0.22 | -1.03 | 0.8898 | -1.09 | 0.6663 | 1.2   | 0.179  | -1.02 | 0.9512 |
| 104030_at | 1428853_at   | Ptch1         | patched homolog 1                              | 1.64  | 0    | 1.24  | 0.0681 | 1.17  | 0.083  | 1.31  | 0.0099 | 1.3   | 0.0545 |
| 104031_at | 1450824_at   | Ptch1         | patched homolog 1                              | -1.05 | 0.63 | -1.05 | 0.5747 | -1.02 | 0.7834 | -1.1  | 0.2564 | 1.23  | 0.1154 |
| 104032_at | 1435666_at   | Mast3         | microtubule associated serine/threonine kin    | 1.99  | 0.43 | 1.4   | 0.3956 | 3.1   | 0.0136 | 2.71  | 0.0069 | 1.14  | 0.644  |
| 104033_at | 1426445_at   | Mgea6         | meningioma expressed antigen 6 (coiled-coi     | -1    | 0.99 | 1.3   | 0.0007 | 1.1   | 0.1451 | 1.36  | 0.0001 | 1.42  | 0.0061 |
| 104034_at | 1435417_at   | Al464131      | expressed sequence Al464131                    | 1.01  | 0.96 | -1.22 | 0.0308 | -1.01 | 0.9403 | -1.4  | 0.0006 | -1.19 | 0.2807 |
| 104035_at | 1456492_at   | ---           | ---                                            | -1.36 | 0.55 | 1.24  | 0.3991 | -1.09 | 0.7641 | -1.34 | 0.3583 | 1.35  | 0.272  |
| 104036_at | 1436479_a_at | Dpp7          | dipeptidylpeptidase 7                          | -1.68 | 0.05 | -1.57 | 0      | -1.08 | 0.313  | -1.42 | 0.0004 | -1.62 | 0.0132 |
| 104038_at | 1448463_at   | 4933434E20Rik | RIKEN cDNA 4933434E20 gene                     | -1.24 | 0.01 | -1.06 | 0.5158 | 1.14  | 0.2963 | -1.03 | 0.7351 | -1.08 | 0.6826 |
| 104041_at | 1454668_at   | 1810009A16Rik | RIKEN cDNA 1810009A16 gene                     | -1.23 | 0.43 | -1.04 | 0.3619 | -1.06 | 0.5417 | -1.1  | 0.0302 | 1.22  | 0.3416 |
| 104042_at | 1423927_at   | Slc35b2       | solute carrier family 35, member B2            | 1.43  | 0.06 | -1.1  | 0.1939 | 1.03  | 0.5803 | 1.08  | 0.2195 | 1.28  | 0.0951 |
| 104044_at | 1430293_a_at | 1300006N24Rik | RIKEN cDNA 1300006N24 gene                     | 1.36  | 0.07 | 1.06  | 0.3092 | -1    | 0.9937 | 1.06  | 0.2765 | 1.16  | 0.1872 |
| 104045_at | 1424029_at   | D10Bwg0791e   | DNA segment, Chr 10, Brigham & Women's         | -1.84 | 0.33 | -2.02 | 0.0047 | -1.46 | 0.0552 | -1.78 | 0.0132 | -2.99 | 0.0986 |
| 104047_at | 1420932_at   | Mapk8         | mitogen activated protein kinase 8             | -1.07 | 0.5  | 1.13  | 0.0845 | 1.15  | 0.0717 | 1.11  | 0.2408 | 1.2   | 0.1491 |
| 104049_at | 1427898_at   | Rnf6          | ring finger protein (C3H2C3 type) 6            | 1.36  | 0.51 | 1.33  | 0.0222 | 1.18  | 0.3237 | 1.18  | 0.1465 | -1.22 | 0.0213 |
| 104050_at | 1419650_at   | Zfr           | zinc finger RNA binding protein                | 1.04  | 0.84 | 1.06  | 0.3163 | -1.29 | 0.0031 | -1.15 | 0.016  | 1.18  | 0.0939 |
| 104052_at | 1433912_at   | 1810011K17Rik | RIKEN cDNA 1810011K17 gene                     | -1.09 | 0.71 | -1.06 | 0.4662 | 1.04  | 0.5472 | -1.07 | 0.3662 | -1.06 | 0.621  |
| 104053_at | 1454711_at   | Trio          | triple functional domain (PTPRF interacting)   | -1.29 | 0.15 | -1.07 | 0.1764 | -1.02 | 0.6992 | -1.14 | 0.0181 | 1.54  | 0.0429 |
| 104056_at | 1433995_s_at | D16Bwg1543e   | DNA segment, Chr 16, Brigham & Women's         | 1.01  | 0.91 | 1.29  | 0.0006 | 1.36  | 0.042  | 1.29  | 0.0069 | 1.31  | 0.0244 |
| 104057_at | 1417320_at   | Grpel1        | GrpE-like 1, mitochondrial                     | 2.02  | 0    | -1.07 | 0.2881 | -1.01 | 0.8715 | -1.03 | 0.7435 | -1.04 | 0.7264 |
| 104058_at | 1428655_at   | 1110018J12Rik | RIKEN cDNA 1110018J12 gene                     | -1.16 | 0.26 | -1.02 | 0.5087 | -1.01 | 0.7899 | -1.01 | 0.6802 | 1.01  | 0.8298 |
| 104059_at | 1437297_at   | Chd8          | chromodomain helicase DNA binding proteir      | -1.52 | 0.24 | 1.1   | 0.2749 | 1.19  | 0.1677 | 1.28  | 0.035  | 1.67  | 0.0309 |
| 104064_at | 1452976_a_at | Slc9a3r2      | solute carrier family 9 (sodium/hydrogen exc   | 1.25  | 0.41 | -1.18 | 0.0918 | 1.02  | 0.8582 | -1.28 | 0.0973 | 1.1   | 0.592  |
| 104065_at | 1424065_at   | Edem1         | ER degradation enhancer, mannosidase alp       | 1.07  | 0.79 | -1.14 | 0.0606 | -1.05 | 0.6557 | -1.14 | 0.1464 | -1.47 | 0.0127 |

|             |              |               |                                                |       |      |       |        |       |        |       |        |       |        |
|-------------|--------------|---------------|------------------------------------------------|-------|------|-------|--------|-------|--------|-------|--------|-------|--------|
| 104066_at   | 1460411_s_at | AW548124      | expressed sequence AW548124                    | 1.19  | 0.81 | 1.11  | 0.5009 | 1.01  | 0.9403 | 1.14  | 0.1938 | 1.21  | 0.5813 |
| 104067_at   | 1426707_at   | Tubgcp3       | tubulin, gamma complex associated protein      | 1.45  | 0.01 | 1.25  | 0.0332 | 1.2   | 0.0673 | 1.37  | 0      | 1.23  | 0.3069 |
| 104069_at   | 1460677_at   | ---           | ---                                            | -1.5  | 0.13 | -1.14 | 0.1165 | -1.03 | 0.6734 | -1.07 | 0.187  | 1.02  | 0.7671 |
| 104070_at   | 1434037_s_at | Pcaf          | p300/CBP-associated factor                     | 1.08  | 0.6  | 1.15  | 0.0346 | 1.41  | 0.0057 | 1.35  | 0.0002 | 1.24  | 0.0999 |
| 104072_at   | 1419059_at   | Apcs          | serum amyloid P-component                      | -2.74 | 0.01 | -2.14 | 0.0002 | 1.19  | 0.0208 | -1.84 | 0.0018 | -3.74 | 0.0031 |
| 104074_at   | 1436522_at   | 0610025L06Rik | RIKEN cDNA 0610025L06 gene                     | -1    | 0.96 | 1.21  | 0.0079 | 1.14  | 0.0667 | 1.2   | 0.0032 | 1.55  | 0.0088 |
| 104076_at   | 1417402_at   | 1190017O12Rik | RIKEN cDNA 1190017O12 gene                     | 1.65  | 0.07 | 1.18  | 0.1726 | 1.25  | 0.2314 | 1.11  | 0.4147 | 1.46  | 0.0285 |
| 104078_g_at | 1449213_at   | 1110049G11Rik | RIKEN cDNA 1110049G11 gene                     | 1.48  | 0.07 | -1.03 | 0.5079 | 1.03  | 0.7541 | 1.09  | 0.1327 | -1.5  | 0.1032 |
| 104080_at   | 1434019_at   | Pdap1         | PDGFA associated protein 1                     | -1.23 | 0.47 | -1.09 | 0.119  | -1.12 | 0.1136 | -1.1  | 0.1065 | -1.03 | 0.7981 |
| 104082_at   | 1427992_a_at | Rab12         | RAB12, member RAS oncogene family              | -1.3  | 0.24 | -1.08 | 0.0572 | -1.12 | 0.0346 | -1.19 | 0.0042 | -1.15 | 0.2647 |
| 104083_at   | 1433956_at   | Cdh5          | cadherin 5                                     | -1.23 | 0.19 | -1.04 | 0.7705 | -1.03 | 0.801  | -1.06 | 0.6848 | 1.38  | 0.0483 |
| 104085_at   | 1453016_at   | 2900042B11Rik | RIKEN cDNA 2900042B11 gene                     | -1.02 | 0.95 | -1.58 | 0.0115 | -1.25 | 0.2404 | -1.96 | 0.0039 | -1.11 | 0.7911 |
| 104086_at   | 1452311_at   | Dmgdh         | dimethylglycine dehydrogenase precursor        | 1.43  | 0.11 | -1.24 | 0.0246 | -1.32 | 0.006  | -1.23 | 0.0216 | -1.14 | 0.3042 |
| 104087_at   | 1419994_s_at | D10Ertd641e   | DNA segment, Chr 10, ERATO Doi 641, exp        | 1.77  | 0.15 | 1.09  | 0.3283 | -1.07 | 0.4179 | 1.07  | 0.161  | -1.64 | 0.0638 |
| 104088_at   | 1427908_at   | Bnip1         | BCL2/adenovirus E1B 19kDa-interacting prc      | 1.26  | 0.52 | -1.05 | 0.1277 | -1.09 | 0.3481 | -1.12 | 0.0472 | 1.05  | 0.5476 |
| 104089_at   | 1428529_at   | 2810026P18Rik | RIKEN cDNA 2810026P18 gene                     | 2.78  | 0.03 | 1.63  | 0.067  | 1.34  | 0.4406 | 2.06  | 0.0036 | 5.97  | 0.1107 |
| 104090_at   | 1433430_s_at | Cdc23         | CDC23 (cell division cycle 23, yeast, homolog  | 1.94  | 0.06 | 1.02  | 0.8727 | -1.1  | 0.5522 | 1.07  | 0.3913 | -1.18 | 0.7497 |
| 104091_at   | 1428197_at   | Tspan9        | tetraspanin 9                                  | -1.19 | 0.43 | -1.36 | 0.0007 | -1.07 | 0.503  | -1.43 | 0.0004 | -1.11 | 0.4298 |
| 104092_at   | 1424056_at   | Usp48         | Hypothetical gene supported by BC058410;       | 1.94  | 0.1  | 1.17  | 0.0917 | 1.25  | 0.0855 | 1.29  | 0.0048 | 1.28  | 0.4545 |
| 104093_at   | 1417756_a_at | Lsp1          | lymphocyte specific 1                          | 2.36  | 0.4  | 3.1   | 0.1814 | -1.34 | 0.1924 | 3.78  | 0.1062 | 2.85  | 0.1546 |
| 104094_at   | 1417928_at   | Pdlim4        | PDZ and LIM domain 4                           | 3.35  | 0.01 | -1.35 | 0.1829 | -1.07 | 0.7021 | -1.17 | 0.3592 | -1.1  | 0.7631 |
| 104095_at   | 1452150_at   | AU040320      | expressed sequence AU040320                    | -1.15 | 0.28 | 1.01  | 0.9431 | -1.06 | 0.6052 | -1.16 | 0.0938 | 1.09  | 0.4709 |
| 104096_at   | 1453804_a_at | Orc4l         | origin recognition complex, subunit 4-like (S. | 1.13  | 0.33 | 1.2   | 0.0899 | 1.37  | 0.0586 | 1.22  | 0.013  | -1.23 | 0.2749 |
| 104097_at   | 1424046_at   | Bub1          | budding uninhibited by benzimidazoles 1 ho     | 1.07  | 0.85 | -1.25 | 0.3625 | -2.23 | 0.0028 | -1.55 | 0.142  | 1.45  | 0.3144 |
| 104098_at   | 1417841_at   | ---           | ---                                            | 1.49  | 0.06 | 1.05  | 0.4442 | -1.07 | 0.2176 | 1.03  | 0.6512 | 1.05  | 0.7858 |
| 104099_at   | 1449184_at   | Pglyrp1       | peptidoglycan recognition protein 1            | 1.01  | 0.98 | 1.74  | 0.0731 | 2.12  | 0.2536 | 1.89  | 0.0511 | 2.22  | 0.0913 |
| 104100_at   | 1424130_a_at | 2310075E07Rik | RIKEN cDNA 2310075E07 gene                     | -2.07 | 0.13 | -1.11 | 0.101  | -1.06 | 0.2619 | -1.1  | 0.1837 | 1.36  | 0.0729 |
| 104101_at   | 1454865_at   | Slc9a8        | solute carrier family 9 (sodium/hydrogen exc   | 1.19  | 0.12 | 1.07  | 0.0738 | 1.06  | 0.2741 | 1.17  | 0.0445 | 1.04  | 0.8009 |
| 104102_at   | 1460495_s_at | Prss25        | protease, serine, 25                           | 2.06  | 0.02 | 1.03  | 0.8044 | 1.03  | 0.846  | 1.28  | 0.008  | 1.26  | 0.6128 |
| 104104_at   | 1460605_at   | AA606869      | EST AA606869                                   | -1.36 | 0.59 | -1.14 | 0.6602 | 1.61  | 0.1012 | -1.08 | 0.7795 | 2.31  | 0.3451 |
| 104105_at   | 1422759_a_at | Xpo6          | exportin 6                                     | -1.08 | 0.57 | 1.03  | 0.5604 | 1.11  | 0.0051 | 1.03  | 0.4385 | 1.03  | 0.7059 |
| 104106_at   | 1426559_at   | Sbno1         | sno, strawberry notch homolog 1 (Drosophili    | -2.82 | 0.31 | 1.28  | 0.3851 | -2.21 | 0.0095 | -1.61 | 0.1166 | -1.1  | 0.7673 |
| 104108_at   | 1424015_at   | Rab6ip1       | Rab6 interacting protein 1                     | 1.01  | 0.96 | 1.45  | 0      | 1.29  | 0.011  | 1.56  | 0.0001 | 1.43  | 0.1755 |
| 104109_at   | 1452828_at   | Fbxo21        | F-box only protein 21                          | 1.41  | 0.06 | 2.73  | 0.0001 | 2.34  | 0      | 3.71  | 0      | 3.65  | 0      |
| 104110_at   | 1451197_s_at | Gatad2a       | GATA zinc finger domain containing 2A          | -1.01 | 0.93 | -1.04 | 0.3397 | 1.19  | 0.0521 | 1.02  | 0.6147 | -1.16 | 0.4151 |
| 104112_at   | 1437742_at   | Rab21         | RAB21, member RAS oncogene family              | 1.04  | 0.89 | -1.02 | 0.5917 | -1.06 | 0.5403 | -1.1  | 0.0545 | -1.09 | 0.4301 |
| 104114_at   | 1460401_at   | 2310050N11Rik | RIKEN cDNA 2310050N11 gene                     | 1.2   | 0.29 | 1.18  | 0.1391 | 1.25  | 0.1351 | 1.24  | 0.0522 | -1.17 | 0.331  |
| 104115_at   | 1452211_at   | Psme4         | proteasome (prosome, macropain) activator      | -1.18 | 0.16 | 1.09  | 0.2586 | 1.45  | 0.0019 | 1.2   | 0.007  | -1.63 | 0.0353 |
| 104116_at   | 1434442_at   | D5Ertd593e    | DNA segment, Chr 5, ERATO Doi 593, expr        | 1.95  | 0.02 | 1.88  | 0.0001 | 1.98  | 0.0002 | 2.2   | 0      | 1.51  | 0.0001 |
| 104117_at   | 1451220_at   | 2310040A13Rik | RIKEN cDNA 2310040A13 gene                     | 1.31  | 0.18 | 1.55  | 0.0026 | 1.71  | 0.0828 | 1.94  | 0.0075 | 1.16  | 0.5999 |
| 104118_at   | 1417062_at   | 2810037C14Rik | RIKEN cDNA 2810037C14 gene                     | 1.21  | 0.27 | 1.09  | 0.3393 | 1.2   | 0.0826 | 1.24  | 0.0331 | 1.42  | 0.1058 |
| 104119_at   | 1434620_s_at | 2610024E20Rik | RIKEN cDNA 2610024E20 gene                     | 1.15  | 0.31 | 1.19  | 0.0243 | -1.05 | 0.593  | 1.12  | 0.1621 | 1.45  | 0.0962 |
| 104121_at   | 1426873_s_at | Jup           | junction plakoglobin                           | 2.43  | 0.02 | 1.05  | 0.5973 | -1.14 | 0.372  | -1.03 | 0.7017 | -1.22 | 0.6268 |
| 104122_at   | 1433808_at   | D330001F17Rik | RIKEN cDNA D330001F17 gene                     | 1.16  | 0.48 | 1.06  | 0.3178 | 1.16  | 0.0192 | 1.08  | 0.3089 | 1.28  | 0.0168 |
| 104123_at   | 1436078_at   | Fcho1         | FCH domain only 1                              | 2.69  | 0.15 | 1.35  | 0.0901 | 1.26  | 0.031  | 1.32  | 0.0169 | 1.86  | 0.0071 |
| 104124_at   | 1428580_at   | Blvr4         | biliverdin reductase A                         | 2.01  | 0.11 | -1.32 | 0.0194 | -1.07 | 0.6041 | -1.02 | 0.889  | -1.05 | 0.6991 |
| 104125_at   | 1417250_at   | Rnf12         | ring finger protein 12                         | -1.1  | 0.72 | 1.01  | 0.9517 | -1.01 | 0.9526 | -1.04 | 0.7273 | 1.01  | 0.9423 |
| 104126_at   | 1415920_at   | Cstf2t        | cleavage stimulation factor, 3' pre-rNA sub    | 1.3   | 0.17 | -1.06 | 0.3764 | 1.1   | 0.2359 | -1.03 | 0.743  | -1.04 | 0.763  |
| 104128_at   | 1416747_at   | D15Mgi27      | DNA Segment, Chr 15, Mouse Genome Info         | -1.34 | 0.22 | -1.02 | 0.7896 | 1.02  | 0.8335 | -1.02 | 0.7867 | 1.17  | 0.0686 |
| 104131_at   | 1460276_a_at | Gpr175        | G protein-coupled receptor 175                 | 2.22  | 0.1  | -1.26 | 0.096  | -1.35 | 0.1602 | 1.05  | 0.6639 | -1.01 | 0.9564 |
| 104132_at   | 1448677_at   | Noc4          | neighbor of Cox4                               | 2.18  | 0.01 | 1.33  | 0.0023 | 1.15  | 0.1248 | 1.29  | 0.0012 | 1.59  | 0.0291 |
| 104134_at   | 1424057_at   | Gdap2         | ganglioside-induced differentiation-associat   | -1.78 | 0.07 | -1.49 | 0.0002 | 1.12  | 0.1602 | -1.64 | 0      | -1.12 | 0.4942 |
| 104135_at   | 1450706_a_at | Arl3          | ADP-ribosylation factor-like 3                 | 1.72  | 0.02 | 1.26  | 0.0145 | 1.05  | 0.2988 | 1.33  | 0.0005 | 1.31  | 0.03   |

|             |              |               |                                              |       |      |       |        |       |        |       |        |       |        |
|-------------|--------------|---------------|----------------------------------------------|-------|------|-------|--------|-------|--------|-------|--------|-------|--------|
| 104136_at   | 1426465_at   | Dlgap4        | discs, large homolog-associated protein 4 (C | 1.32  | 0.57 | -1.09 | 0.5439 | -1.43 | 0.0426 | 1.02  | 0.8467 | 1.89  | 0.0751 |
| 104137_at   | 1449302_at   | Abca2         | ATP-binding cassette, sub-family A (ABC1),   | -1.56 | 0.44 | -1.6  | 0      | -1.22 | 0.1579 | -2.13 | 0      | -1.34 | 0.411  |
| 104138_at   | 1448489_at   | Pafah2        | platelet-activating factor acetylhydrolase 2 | 1.47  | 0.47 | -1.25 | 0.0049 | -1.01 | 0.9072 | -1.07 | 0.3216 | -1.91 | 0.0279 |
| 104139_at   | 1452094_at   | P4ha1         | procollagen-proline, 2-oxoglutarate 4-dioxyg | 1.58  | 0.37 | 1.1   | 0.5356 | 1.42  | 0.0321 | 1.11  | 0.6045 | 5.08  | 0.2011 |
| 104140_s_at | 1451170_s_at | Nomo1         | nodal modulator 1                            | -1.6  | 0.01 | 1.01  | 0.9166 | -1.06 | 0.3523 | -1.08 | 0.3248 | 1.05  | 0.6842 |
| 104141_at   | 1460689_at   | D15Wsu75e     | DNA segment, Chr 15, Wayne State Univers     | -1.04 | 0.8  | -1.03 | 0.5428 | 1.12  | 0.1616 | 1.11  | 0.0885 | 1.03  | 0.733  |
| 104143_at   | 1418455_at   | Copz2         | coatamer protein complex, subunit zeta 2     | 1.92  | 0.17 | 1.11  | 0.1465 | -1.13 | 0.1405 | 1.06  | 0.6288 | 1.68  | 0.0905 |
| 104144_at   | 1448437_a_at | Gtpbp2        | GTP binding protein 2                        | -1.07 | 0.74 | 1.16  | 0.2175 | 1.19  | 0.0751 | 1.19  | 0.055  | 1.38  | 0.051  |
| 104145_at   | 1424643_at   | ---           | ---                                          | -1.05 | 0.62 | 1.11  | 0.0559 | -1.08 | 0.341  | 1.1   | 0.0419 | -1.19 | 0.3256 |
| 104147_at   | 1417773_at   | Nans          | N-acetylneuraminic acid synthase (sialic aci | 1.55  | 0.26 | -1.02 | 0.7962 | -1.05 | 0.5939 | -1.15 | 0.0697 | -1.12 | 0.6144 |
| 104148_at   | 1452145_at   | H6pd          | hexose-6-phosphate dehydrogenase (gluco:     | -1.11 | 0.22 | 1.29  | 0.0014 | 1.21  | 0.0214 | 1.34  | 0      | -1.01 | 0.9288 |
| 104149_at   | 1449731_s_at | ---           | ---                                          | 1.38  | 0.32 | 1.25  | 0.1381 | 1.08  | 0.3695 | 1.52  | 0.0073 | 1.5   | 0.0128 |
| 104151_at   | 1451522_s_at | Lrch4         | leucine-rich repeats and calponin homology   | 1.08  | 0.72 | -1.09 | 0.3178 | -1.04 | 0.656  | -1.12 | 0.0737 | -1.07 | 0.3748 |
| 104152_at   | 1429650_at   | 2310004N11Rik | RIKEN cDNA 2310004N11 gene                   | -1.35 | 0.04 | 1.03  | 0.6531 | -1    | 0.9929 | -1.13 | 0.0003 | 1.24  | 0.0019 |
| 104153_at   | 1418238_at   | Ivd           | isovaleryl coenzyme A dehydrogenase          | 2.12  | 0.01 | 1.25  | 0.0062 | -1.13 | 0.0833 | 1.26  | 0.0011 | 1.2   | 0.2428 |
| 104156_r_at | 1449363_at   | Atf3          | activating transcription factor 3            | 1.26  | 0.44 | 1.85  | 0.2924 | -1.11 | 0.2965 | 1.48  | 0.3861 | 2.3   | 0.217  |
| 104157_at   | 1435369_at   | C78212        | expressed sequence C78212                    | 2.41  | 0.1  | 1.38  | 0.1094 | 1.58  | 0.0344 | 1.5   | 0.0382 | 1.84  | 0.2728 |
| 104158_at   | 1429002_at   | Skiip         | SKI interacting protein                      | 1.24  | 0.77 | 1.38  | 0.0321 | -1.69 | 0.0308 | -1.13 | 0.6606 | 3.24  | 0.0041 |
| 104159_at   | 1418218_at   | Ceacam9       | CEA-related cell adhesion molecule 9         | -3.26 | 0.24 | -2.63 | 0.0022 | -1.08 | 0.8157 | -1.46 | 0.2526 | 2.53  | 0.04   |
| 104160_at   | 1422717_at   | Acp1          | acid phosphatase 1, soluble                  | -1.45 | 0.18 | -1.03 | 0.6874 | -1.03 | 0.7458 | -1.15 | 0.223  | 1.09  | 0.7121 |
| 104161_at   | 1420936_s_at | Cpsf2         | cleavage and polyadenylation specific factor | -1.53 | 0.06 | -1.08 | 0.4044 | 1.03  | 0.7606 | -1.18 | 0.1411 | -1.13 | 0.5389 |
| 104163_at   | 1426760_at   | Ipo8          | importin 8                                   | -1.13 | 0.61 | -1.29 | 0.0087 | 1.07  | 0.5385 | -1.31 | 0.0016 | -1.36 | 0.1573 |
| 104164_at   | 1428689_at   | Tysnd1        | trypsin domain containing 1                  | 1.04  | 0.68 | -1.15 | 0.0272 | -1.16 | 0.0514 | -1.34 | 0.0001 | -1.35 | 0.1728 |
| 104165_at   | 1418486_at   | Vnn1          | vanin 1                                      | 1.68  | 0.32 | -1.11 | 0.7006 | 1.24  | 0.2787 | -1.59 | 0.0219 | -2.28 | 0.1286 |
| 104166_at   | 1449476_at   | Rage          | renal tumor antigen                          | -2.02 | 0.21 | 1     | 0.984  | -1.03 | 0.8635 | -1.15 | 0.4562 | 1.45  | 0.0497 |
| 104169_at   | 1423477_at   | Zic1          | zinc finger protein of the cerebellum 1      | 2.6   | 0.36 | -2.65 | 0.0397 | -2.02 | 0.1122 | -2.89 | 0.0311 | 2.14  | 0.1695 |
| 104171_f_at | 1419141_at   | ---           | ---                                          | 1.41  | 0.17 | 1.06  | 0.6022 | 1.08  | 0.4677 | -1.05 | 0.6061 | -1.06 | 0.8358 |
| 104172_at   | 1451648_a_at | Folr2         | folate receptor 2 (fetal)                    | 1.17  | 0.57 | -1.58 | 0.0003 | -1.28 | 0.0124 | -2.06 | 0      | -1.14 | 0.825  |
| 104173_at   | 1450912_at   | Ms4a1         | membrane-spanning 4-domains, subfamily A     | -1.31 | 0.18 | -1.33 | 0.009  | -1.28 | 0.0889 | -1.63 | 0.0002 | 1.07  | 0.5411 |
| 104174_at   | 1459546_s_at | Enpp1         | ectonucleotide pyrophosphatase/phosphodi     | 4.17  | 0.01 | -1.11 | 0.3973 | 1.34  | 0.0091 | -1.1  | 0.4516 | 2.17  | 0.1153 |
| 104175_at   | 1419580_at   | ---           | ---                                          | -1.34 | 0.17 | 1.03  | 0.7117 | 1.06  | 0.4547 | 1.11  | 0.2049 | 1.46  | 0.2556 |
| 104176_at   | 1452633_s_at | Aak1          | AP2 associated kinase 1                      | 1.34  | 0.08 | 1.67  | 0.0025 | 1.27  | 0.044  | 1.92  | 0.0001 | 1.36  | 0.1248 |
| 104177_at   | 1436058_at   | Rsad2         | radical S-adenosyl methionine domain cont    | -1.47 | 0.02 | -1.18 | 0.5769 | -2.1  | 0.0041 | -1.13 | 0.6867 | -1.7  | 0.2525 |
| 104179_at   | 1434312_at   | Al788669      | expressed sequence Al788669                  | 1.08  | 0.75 | -1.21 | 0.2243 | -1.34 | 0.0074 | -1.41 | 0.0042 | -1.03 | 0.8851 |
| 104180_at   | 1420554_a_at | Rac3          | RAS-related C3 botulinum substrate 3         | 1.21  | 0.23 | 1.16  | 0.3084 | 1.25  | 0.2363 | 1.12  | 0.3839 | 1.88  | 0.2822 |
| 104181_at   | 1420723_at   | Vnn3          | vanin 3                                      | 1.74  | 0.07 | 1.04  | 0.6381 | -1.01 | 0.8551 | 1.05  | 0.6018 | 1.14  | 0.1253 |
| 104182_at   | 1418405_at   | Hgfac         | hepatocyte growth factor activator           | -1.09 | 0.33 | -1.06 | 0.405  | -1.06 | 0.4232 | -1.15 | 0.0062 | 1.36  | 0.0205 |
| 104184_at   | 1450791_at   | Nppb          | natriuretic peptide precursor type B         | -2.5  | 0.1  | 1.03  | 0.8048 | 1.17  | 0.2088 | -1.02 | 0.9023 | 1.86  | 0.0531 |
| 104185_at   | 1424689_at   | Prss32        | protease, serine, 32                         | -1.98 | 0.13 | 1.02  | 0.919  | 1.2   | 0.2729 | 1.14  | 0.4959 | 1.75  | 0.3971 |
| 104186_at   | 1429108_at   | Rnf184        | ring finger protein 184                      | -1.19 | 0.65 | 1.85  | 0.0449 | 1.24  | 0.5439 | 1.61  | 0.1219 | 2.75  | 0.0081 |
| 104187_at   | 1418375_at   | D10Wsu93e     | DNA segment, Chr 10, Wayne State Univers     | -1.09 | 0.53 | -1.09 | 0.3363 | -1.04 | 0.7456 | -1.02 | 0.749  | 1.63  | 0.0093 |
| 104188_at   | 1455556_at   | Notch2        | Notch gene homolog 2 (Drosophila)            | 1.34  | 0.16 | 1.31  | 0.1507 | 1.21  | 0.4064 | 1.24  | 0.0686 | 1.08  | 0.5107 |
| 104190_at   | 1435350_at   | Traf6         | Tnf receptor-associated factor 6             | 1.77  | 0.04 | 1.3   | 0.141  | 1.3   | 0.1947 | 1.17  | 0.4868 | 1.29  | 0.3453 |
| 104193_at   | 1452268_at   | 2810485I05Rik | RIKEN cDNA 2810485I05 gene                   | 1.13  | 0.56 | 1.38  | 0.0012 | 1.53  | 0.0218 | 1.49  | 0.0001 | 1.52  | 0.0057 |
| 104194_at   | 1448696_at   | Heph          | hephaestin                                   | -1.77 | 0.14 | -1.27 | 0.1797 | -1.08 | 0.7439 | 1.08  | 0.5317 | 2.47  | 0.2017 |
| 104195_at   | 1429207_at   | 5730408K05Rik | RIKEN cDNA 5730408K05 gene                   | -1.02 | 0.94 | 1.15  | 0.1879 | 1.05  | 0.6455 | 1.13  | 0.2299 | 1.4   | 0.2567 |
| 104196_at   | 1429253_at   | Zfp262        | zinc finger protein 262                      | 1.24  | 0.11 | -1.08 | 0.4678 | -1.32 | 0.0103 | -1.09 | 0.4206 | -1.02 | 0.9604 |
| 104197_at   | 1434938_at   | Rbm9          | RNA binding motif protein 9                  | -1.41 | 0.42 | 1.07  | 0.7735 | 1.22  | 0.2343 | 1     | 0.9765 | -1.11 | 0.3998 |
| 104198_at   | 1427095_at   | Cdcp1         | CUB domain containing protein 1              | -1.13 | 0.69 | -1.54 | 0.005  | -1.99 | 0.0005 | -2.11 | 0.0002 | 1.06  | 0.7121 |
| 104199_at   | 1460743_at   | Tigd5         | tigger transposable element derived 5        | -1.05 | 0.57 | 1.08  | 0.2879 | 1.09  | 0.3052 | 1.04  | 0.683  | 1.16  | 0.208  |
| 104200_at   | 1435860_at   | ---           | ---                                          | 4.17  | 0.01 | 1.4   | 0.0008 | 1.7   | 0.0001 | 1.48  | 0.0001 | 1.81  | 0.0208 |
| 104201_at   | 1417553_at   | Plac1         | placental specific protein 1                 | -1.34 | 0.4  | -1.09 | 0.23   | -1.18 | 0.0101 | -1.41 | 0.007  | 1.4   | 0.1133 |
| 104202_at   | 1435430_at   | Tmem1         | transmembrane protein 1                      | -1.26 | 0.31 | -1.02 | 0.895  | 1.18  | 0.2499 | 1.11  | 0.5399 | -1.07 | 0.8147 |



|             |              |               |                                                 |       |      |       |        |       |        |       |        |       |        |
|-------------|--------------|---------------|-------------------------------------------------|-------|------|-------|--------|-------|--------|-------|--------|-------|--------|
| 104205_at   | 1449827_at   | Agc1          | aggrecan 1                                      | -1.24 | 0.79 | -1.43 | 0.4112 | 1.14  | 0.7643 | 1.16  | 0.6904 | -1.05 | 0.9347 |
| 104206_at   | 1453287_at   | 5730557B15Rik | RIKEN cDNA 5730557B15 gene                      | -1.14 | 0.39 | -1.06 | 0.7511 | -1.14 | 0.4034 | -1.26 | 0.0825 | -1.24 | 0.3229 |
| 104207_at   | 1439018_at   | 6330505N24Rik | RIKEN cDNA 6330505N24 gene                      | -1.61 | 0.32 | -1.03 | 0.8366 | 1.11  | 0.5831 | 1.05  | 0.7955 | 1.83  | 0.1867 |
| 104208_at   | 1435003_at   | Pik4ca        | phosphatidylinositol 4-kinase, catalytic, alph. | 3.05  | 0.07 | 1.14  | 0.2385 | 1.16  | 0.2455 | 1.27  | 0.0623 | 1.53  | 0.0006 |
| 104209_at   | 1449406_at   | Cyhr1         | cysteine and histidine rich 1                   | 2.04  | 0.12 | -1.16 | 0.0065 | -1.09 | 0.146  | -1.21 | 0.0018 | -1.23 | 0.4577 |
| 104210_at   | 1455158_at   | Itga3         | integrin alpha 3                                | -1.42 | 0.62 | -1.31 | 0.0191 | -1.29 | 0.0335 | -1.42 | 0.0003 | 1.35  | 0.1515 |
| 104211_at   | 1460305_at   | Itga3         | integrin alpha 3                                | -1.22 | 0.56 | -1.07 | 0.2389 | -1.09 | 0.1961 | -1.21 | 0.0037 | 1.2   | 0.1216 |
| 104213_at   | 1451548_at   | ---           | ---                                             | 2.1   | 0.02 | 1.05  | 0.3592 | 1.1   | 0.1817 | 1.21  | 0.0137 | 1.12  | 0.6573 |
| 104214_at   | 1417929_at   | Slc7a8        | solute carrier family 7 (cationic amino acid tr | 2.69  | 0.02 | 1.39  | 0.0671 | 1.03  | 0.9178 | 1.25  | 0.4581 | 1.47  | 0.4842 |
| 104215_at   | 1435444_at   | Atf6          | activating transcription factor 6               | 1.6   | 0.11 | -1.04 | 0.6365 | 1.19  | 0.0787 | -1.08 | 0.3401 | -1.06 | 0.6266 |
| 104217_at   | 1449526_a_at | Gdpd3         | glycerophosphodiester phosphodiesterase c       | 1.14  | 0.4  | 1.13  | 0.4945 | 1.32  | 0.0891 | 1.23  | 0.1504 | 1.2   | 0.2118 |
| 104220_at   | 1422771_at   | ---           | ---                                             | -1    | 0.99 | 1.11  | 0.2055 | 1.05  | 0.5144 | -1.03 | 0.7104 | -1.06 | 0.6897 |
| 104221_at   | 1418326_at   | Slc7a5        | solute carrier family 7 (cationic amino acid tr | -1.12 | 0.11 | -1.15 | 0.0382 | 1.09  | 0.4425 | -1.08 | 0.3945 | 1.14  | 0.5011 |
| 104222_f_at | 1419805_s_at | Ggps1         | geranylgeranyl diphosphate synthase 1           | 1.37  | 0.6  | 1.04  | 0.8701 | 1.42  | 0.1449 | 1.4   | 0.0711 | -1.07 | 0.8509 |
| 104225_at   | 1437074_at   | ---           | ---                                             | 1.11  | 0.52 | 1.08  | 0.62   | -1.32 | 0.2158 | -1    | 0.9931 | -1.85 | 0.386  |
| 104227_at   | 1417894_at   | Gpr97         | G protein-coupled receptor 97                   | 1.08  | 0.73 | -1.1  | 0.4866 | 1.05  | 0.7059 | -1.12 | 0.4464 | 1.64  | 0.1338 |
| 104228_at   | 1437534_at   | ---           | ---                                             | -3.83 | 0.34 | -1.01 | 0.9803 | -1.04 | 0.866  | -1.27 | 0.2902 | 2.29  | 0.197  |
| 104229_at   | 1449553_at   | 2610200G18Rik | RIKEN cDNA 2610200G18 gene                      | -1.78 | 0.17 | 1     | 0.9974 | -1.17 | 0.2653 | 1.09  | 0.5033 | -1.3  | 0.3127 |
| 104230_at   | 1417904_at   | Dclre1a       | DNA cross-link repair 1A, PSO2 homolog (S       | 4.77  | 0.05 | 1.99  | 0.0014 | 1.06  | 0.6305 | 1.92  | 0.0002 | 6.04  | 0.0051 |
| 104231_at   | 1455491_at   | LOC432467     | similar to heterogeneous nuclear ribonucleo     | 1.24  | 0.37 | -1.14 | 0.2789 | -1.1  | 0.2941 | -1.06 | 0.5849 | 1.28  | 0.2561 |
| 104232_at   | 1416715_at   | Gjb3          | gap junction membrane channel protein bet       | -1.48 | 0.41 | -1.42 | 0.3822 | 1.15  | 0.7114 | -1.4  | 0.3763 | 2.12  | 0.0871 |
| 104234_at   | 1449194_at   | Mrps25        | mitochondrial ribosomal protein S25             | 2.17  | 0.02 | 1.22  | 0.0946 | 1.06  | 0.6299 | 1.05  | 0.5852 | -1.26 | 0.2286 |
| 104235_at   | 1433832_at   | B230369L08Rik | RIKEN cDNA B230369L08 gene                      | 1.36  | 0.2  | 1.49  | 0.0004 | 1.45  | 0.0011 | 1.72  | 0      | 2.22  | 0.0008 |
| 104237_at   | 1452621_at   | Pcbd2         | pterin 4 alpha carbinolamine dehydratase/di     | 1.5   | 0    | -1.03 | 0.5656 | 1.07  | 0.5779 | -1.12 | 0.1295 | -1.03 | 0.7829 |
| 104238_at   | 1451553_at   | Art5          | ADP-ribosyltransferase 5                        | -1.93 | 0.02 | -1.3  | 0.0007 | -1.17 | 0.0173 | -1.27 | 0.0013 | -1.14 | 0.2093 |
| 104239_at   | 1418398_a_at | Phemx         | pan hematopoietic expression                    | 1.14  | 0.84 | 1.01  | 0.9488 | -1.03 | 0.9092 | 1.25  | 0.2736 | 1.87  | 0.0093 |
| 104241_at   | 1434487_at   | Mef2d         | myocyte enhancer factor 2D                      | -1.46 | 0.05 | -1.09 | 0.2855 | 1.04  | 0.5853 | -1.05 | 0.508  | 1.25  | 0.1127 |
| 104244_at   | 1435889_at   | Mark2         | MAP/microtubule affinity-regulating kinase 2    | -1.02 | 0.91 | 1.15  | 0.2495 | 1.18  | 0.1895 | 1.16  | 0.238  | 1.19  | 0.4631 |
| 104245_at   | 1452929_at   | Rsn           | restin (Reed-Steinberg cell-expressed intern    | 1.29  | 0.11 | 1.08  | 0.2844 | 1.08  | 0.3221 | 1.19  | 0.0815 | 1.35  | 0.1047 |
| 104246_at   | 1434561_at   | Asxl1         | additional sex combs like 1 (Drosophila)        | -1.37 | 0.15 | -1.01 | 0.9185 | -1.14 | 0.174  | -1.15 | 0.1567 | 1.39  | 0.0113 |
| 104247_at   | 1451380_at   | Zfyve19       | zinc finger, FYVE domain containing 19          | 1.09  | 0.61 | -1.04 | 0.4467 | -1.02 | 0.7188 | 1     | 0.997  | 1.04  | 0.7367 |
| 104250_at   | 1434694_at   | Lrrc8         | leucine rich repeat containing 8                | 1.02  | 0.93 | -1.05 | 0.4126 | 1.12  | 0.1906 | -1    | 0.9566 | 1.16  | 0.1546 |
| 104252_at   | 1433935_at   | AU020206      | expressed sequence AU020206                     | 1.95  | 0.08 | 1.23  | 0.3814 | -1.13 | 0.2833 | 1.38  | 0.2485 | 1.06  | 0.8599 |
| 104253_at   | 1434805_at   | Mllt1         | myeloid/lymphoid or mixed lineage-leukemic      | -1.65 | 0.32 | 1.06  | 0.5505 | -1.04 | 0.7228 | -1.05 | 0.5591 | 1.45  | 0.1667 |
| 104254_at   | 1428789_at   | Ralgps2       | Ral GEF with PH domain and SH3 binding n        | 1.17  | 0.49 | -1.2  | 0.0777 | 1.19  | 0.1339 | -1.2  | 0.0831 | 1.92  | 0.0928 |
| 104255_at   | 1435551_at   | FHOS2         | formin-family protein FHOS2                     | -1.82 | 0.14 | -1.15 | 0.5392 | -1.15 | 0.5131 | -1.03 | 0.8856 | -1.03 | 0.9149 |
| 104257_g_at | 1451206_s_at | Pscdbp        | pleckstrin homology, Sec7 and coiled-coil dc    | -1.06 | 0.44 | 1.11  | 0.3549 | -1.02 | 0.8294 | 1.15  | 0.2277 | 1.35  | 0.0221 |
| 104258_at   | 1427943_at   | Acyp2         | acylphosphatase 2, muscle type                  | 1.3   | 0.55 | 1.08  | 0.7032 | 1.01  | 0.9568 | -1.04 | 0.845  | -2.42 | 0.0562 |
| 104259_at   | 1450416_at   | Cbx5          | chromobox homolog 5 (Drosophila HP1a)           | -1.03 | 0.88 | -1.06 | 0.5375 | -1.2  | 0.0381 | -1.11 | 0.2267 | -1.64 | 0.0831 |
| 104260_at   | 1435326_at   | AW112037      | expressed sequence AW112037                     | -1.05 | 0.85 | -1.19 | 0.0884 | -1.22 | 0.0894 | -1.25 | 0.0149 | -1.69 | 0.0033 |
| 104261_at   | 1435077_at   | Asxl1         | additional sex combs like 1 (Drosophila)        | 1.87  | 0.2  | 1.28  | 0.0454 | 1.12  | 0.48   | 1.24  | 0.0279 | 1.38  | 0.3474 |
| 104262_at   | 1422324_a_at | Pthlh         | parathyroid hormone-like peptide                | -2.35 | 0.02 | -1.18 | 0.4214 | -1.17 | 0.5317 | -1.12 | 0.5607 | -1.08 | 0.8794 |
| 104264_at   | 1449099_at   | Lrba          | LPS-responsive beige-like anchor                | 1.02  | 0.96 | 1.02  | 0.7473 | -1.03 | 0.6856 | 1.05  | 0.3124 | -1.2  | 0.1033 |
| 104265_at   | 1449379_at   | Kdr           | kinase insert domain protein receptor           | -1.49 | 0.31 | -1.22 | 0.0404 | -1.28 | 0.0598 | -1.31 | 0.0914 | 1.71  | 0.0091 |
| 104266_at   | 1439506_at   | Gm98          | gene model 98, (NCBI)                           | 1.42  | 0.23 | 1.09  | 0.2286 | 1.11  | 0.1794 | 1.16  | 0.0812 | 1.16  | 0.3813 |
| 104267_at   | 1417329_at   | Slc23a2       | solute carrier family 23 (nucleobase transpo    | 1.72  | 0.08 | 1.87  | 0.0051 | 1.31  | 0.0067 | 1.72  | 0      | 2.35  | 0.0012 |
| 104268_at   | 1452416_at   | Il6ra         | interleukin 6 receptor, alpha                   | 1.39  | 0.31 | -1.03 | 0.8998 | -1.71 | 0.0213 | -1.36 | 0.2182 | 1.44  | 0.1547 |
| 104269_at   | 1422531_at   | Syt5          | synaptotagmin 5                                 | -1.08 | 0.49 | 1.03  | 0.7192 | 1.03  | 0.5737 | -1.01 | 0.9363 | 1.15  | 0.1971 |
| 104270_at   | 1451992_at   | Adrbk1        | adrenergic receptor kinase, beta 1              | 2.9   | 0    | -1.01 | 0.8946 | 1.2   | 0.0003 | 1.12  | 0.2466 | 1.39  | 0.439  |
| 104271_at   | 1418554_at   | Admr          | adrenomedullin receptor                         | -1.07 | 0.71 | -1.26 | 0.0627 | 1.03  | 0.7641 | -1.22 | 0.2214 | 1.13  | 0.1746 |
| 104272_s_at | 1421450_a_at | Map3k4        | mitogen activated protein kinase kinase kina    | 2.72  | 0.02 | -1.09 | 0.361  | -1.04 | 0.7947 | -1.19 | 0.0186 | -1.03 | 0.917  |
| 104273_at   | 1419002_s_at | Baat          | bile acid-Coenzyme A: amino acid N-acyltra      | 1.01  | 0.97 | -1    | 0.9989 | -1.06 | 0.5711 | -1.08 | 0.3703 | -1.08 | 0.6554 |
| 104274_at   | 1435450_at   | ---           | ---                                             | -1.36 | 0.21 | 1.1   | 0.2196 | -1    | 0.9893 | 1.11  | 0.2251 | 1.12  | 0.5836 |

|             |              |               |                                              |       |      |       |        |       |        |       |        |       |        |
|-------------|--------------|---------------|----------------------------------------------|-------|------|-------|--------|-------|--------|-------|--------|-------|--------|
| 104275_g_at | 1427739_a_at | Trp53         | transformation related protein 53            | -1.23 | 0.62 | -1.12 | 0.4531 | -1.09 | 0.6118 | 1.24  | 0.1688 | 1.03  | 0.9196 |
| 104276_at   | 1452803_at   | Glipr2        | GLI pathogenesis-related 2                   | 1.21  | 0.45 | 1.84  | 0.2903 | 1.12  | 0.2755 | 1.53  | 0.1202 | 1.26  | 0.2961 |
| 104277_at   | 1421059_a_at | Alg2          | asparagine-linked glycosylation 2 homolog (  | 1.2   | 0.41 | 1.24  | 0.0143 | 1.38  | 0.0065 | 1.15  | 0.0952 | 1.16  | 0.2911 |
| 104279_at   | 1415754_at   | 1810060D16Rik | RIKEN cDNA 1810060D16 gene                   | -1.31 | 0.53 | -1.08 | 0.1663 | -1.11 | 0.046  | -1.09 | 0.0327 | 1.07  | 0.2979 |
| 104280_at   | 1417788_at   | Sncg          | synuclein, gamma                             | -1.03 | 0.96 | -1.16 | 0.7034 | -1.17 | 0.672  | -1.28 | 0.5301 | 1.6   | 0.1637 |
| 104283_at   | 1416060_at   | Tbc1d15       | TBC1 domain family, member 15                | -1.31 | 0.23 | 1.36  | 0.0022 | 1.43  | 0.0509 | 1.49  | 0.0003 | 1.93  | 0.0324 |
| 104284_at   | 1454786_at   | 5031439G07Rik | RIKEN cDNA 5031439G07 gene                   | 1.17  | 0.41 | 1.21  | 0.0131 | 1.17  | 0.0381 | 1.28  | 0.0007 | 1.4   | 0.0008 |
| 104285_at   | 1427229_at   | Hmgcr         | 3-hydroxy-3-methylglutaryl-Coenzyme A red    | 1.17  | 0.73 | -1.41 | 0.0963 | -1.33 | 0.2    | -1.39 | 0.0896 | -1.5  | 0.3829 |
| 104286_at   | 1448889_at   | Slc38a4       | solute carrier family 38, member 4           | -1.01 | 0.94 | 1.23  | 0.0034 | 1.01  | 0.8748 | 1.19  | 0.0019 | 1.13  | 0.1262 |
| 104287_at   | 1448866_at   | Senp3         | SUMO/sentrin specific protease 3             | 1.41  | 0.23 | 1.05  | 0.6512 | 1.13  | 0.2455 | 1.01  | 0.9423 | 1.22  | 0.078  |
| 104288_at   | 1451971_at   | Cul4a         | cullin 4A                                    | 1.15  | 0.57 | 1.17  | 0.0643 | 1.24  | 0.0294 | 1.09  | 0.355  | -1.06 | 0.6669 |
| 104289_at   | 1423713_at   | Abcb8         | ATP-binding cassette, sub-family B (MDR/T,   | 1.38  | 0.59 | -1.21 | 0.2728 | 1.04  | 0.7223 | 1     | 0.9937 | -1.5  | 0.005  |
| 104290_at   | 1449217_at   | Casp8ap2      | caspace 8 associated protein 2               | 1.89  | 0.03 | 1.08  | 0.3688 | 1.27  | 0.0642 | 1.23  | 0.0726 | -1.04 | 0.7326 |
| 104292_at   | 1424127_at   | Eya2          | eyes absent 2 homolog (Drosophila)           | -1.49 | 0.56 | -1.24 | 0.4022 | 1.66  | 0.0488 | 1.23  | 0.421  | 1.71  | 0.3082 |
| 104293_at   | 1428081_at   | Kihl21        | kelch-like 21 (Drosophila)                   | 1.14  | 0.37 | 1.19  | 0.0418 | 1.18  | 0.0753 | 1.26  | 0.0052 | 1.22  | 0.2132 |
| 104294_at   | 1454905_at   | Ibtk          | inhibitor of Bruton agammaglobulinemia tyro  | 1.34  | 0.23 | 1.27  | 0.0101 | 1.32  | 0.0528 | 1.21  | 0.029  | -1.09 | 0.4905 |
| 104296_at   | 1434551_at   | 1110031M08Rik | RIKEN cDNA 1110031M08 gene /// similar t     | 1.24  | 0.45 | -1.01 | 0.8952 | -1.1  | 0.3393 | -1.06 | 0.4014 | -1.35 | 0.4267 |
| 104297_at   | 1428096_at   | Ipo11         | importin 11                                  | 1.18  | 0.2  | -1.15 | 0.0321 | -1.14 | 0.0677 | -1.16 | 0.0018 | -1.17 | 0.1754 |
| 104298_at   | 1424915_s_at | ---           | ---                                          | -1    | 1    | -1.94 | 0      | 1.04  | 0.606  | -1.97 | 0      | -1.37 | 0.1406 |
| 104299_at   | 1423668_at   | Zdhhc14       | zinc finger, DHHC domain containing 14       | 1.12  | 0.72 | -1.33 | 0.0564 | 1.39  | 0.0031 | -1.21 | 0.2257 | 1.34  | 0.476  |
| 104300_at   | 1434998_at   | Iqgap1        | IQ motif containing GTPase activating protei | 1.94  | 0    | 1.3   | 0.1614 | 1.05  | 0.7436 | 1.46  | 0.1577 | 1.61  | 0.2483 |
| 104301_at   | 1452591_a_at | 2410018G20Rik | RIKEN cDNA 2410018G20 gene                   | -1.03 | 0.87 | -1.04 | 0.5201 | -1.05 | 0.4615 | -1.11 | 0.1428 | -1.24 | 0.0941 |
| 104302_f_at | 1454781_x_at | CommD9        | COMM domain containing 9                     | -1.08 | 0.59 | -1.11 | 0.2841 | -1.14 | 0.2097 | -1.06 | 0.5863 | 1.05  | 0.713  |
| 104304_r_at | 1439266_a_at | Polr3k        | polymerase (RNA) III (DNA directed) polype   | 1.23  | 0.44 | -1.25 | 0.0928 | -1.07 | 0.5346 | -1.16 | 0.1338 | -2.07 | 0.0239 |
| 104306_at   | 1448215_a_at | Dpp3          | dipeptidylpeptidase 3                        | -1.01 | 0.88 | -1.14 | 0.0703 | 1.02  | 0.7972 | -1.04 | 0.5684 | -2.86 | 0.0279 |
| 104308_at   | 1419128_at   | Iltgax        | integrin alpha X                             | -1.42 | 0    | 1.11  | 0.5751 | 1.04  | 0.5691 | 1.41  | 0.0663 | 1.39  | 0.0861 |
| 104310_at   | 1428245_at   | G6pc3         | glucose 6 phosphatase, catalytic, 3          | 1.06  | 0.68 | -1.15 | 0.1073 | -1.24 | 0.0231 | -1.05 | 0.478  | 1.01  | 0.9869 |
| 104311_at   | 1426486_at   | Ubx2          | UBX domain containing 2                      | 1.65  | 0.29 | 1.03  | 0.8197 | -1.22 | 0.0406 | -1.11 | 0.2757 | -1.13 | 0.1306 |
| 104312_at   | 1425699_a_at | Abhd14a       | abhydrolase domain containing 14A            | 1     | 0.99 | -1.03 | 0.8087 | -1.05 | 0.6836 | 1     | 0.9993 | 1.49  | 0.0365 |
| 104313_at   | 1451149_at   | Pgm2          | phosphoglucomutase 2                         | 1.09  | 0.61 | 1.19  | 0.0432 | 1.02  | 0.6306 | 1.26  | 0.0025 | -1.1  | 0.45   |
| 104315_at   | 1451309_at   | Arhgap1       | Rho GTPase activating protein 1              | 1.32  | 0.17 | 1.02  | 0.7965 | 1     | 0.9711 | 1.18  | 0.0447 | 1.12  | 0.5602 |
| 104317_at   | 1448809_at   | Cse1l         | chromosome segregation 1-like (S. cerevisie  | 1.22  | 0.42 | 1.02  | 0.8719 | -1.02 | 0.8972 | 1.02  | 0.846  | 1.08  | 0.3706 |
| 104318_at   | 1426770_at   | Pex5          | peroxisome biogenesis factor 5               | -1.36 | 0.08 | -1.02 | 0.781  | -1.11 | 0.2518 | -1.05 | 0.5101 | -1.13 | 0.4216 |
| 104320_at   | 1427929_a_at | Pdxk          | pyridoxal (pyridoxine, vitamin B6) kinase    | 1.26  | 0.17 | 1.15  | 0.1231 | -1.02 | 0.8498 | 1.26  | 0.0112 | 1.43  | 0.0512 |
| 104322_at   | 1434748_at   | Ckap2         | cytoskeleton associated protein 2            | -1.41 | 0.58 | 1.43  | 0.5013 | -1.36 | 0.3541 | 1.97  | 0.209  | 1.41  | 0.3041 |
| 104324_at   | 1428467_at   | Tardbp        | TAR DNA binding protein                      | 1.27  | 0.07 | 1.05  | 0.2588 | 1.02  | 0.8226 | 1.08  | 0.3803 | 1.2   | 0.5334 |
| 104325_at   | 1451371_at   | Mrap          | melanocortin 2 receptor accessory protein    | 1.16  | 0.45 | -1.37 | 0.0001 | -1.46 | 0      | -1.56 | 0      | -1.48 | 0.0207 |
| 104326_at   | 1451079_at   | Adpgk         | ADP-dependent glucokinase                    | 1.06  | 0.71 | 1.08  | 0.4536 | 1.2   | 0.2462 | 1.07  | 0.4685 | -1.07 | 0.6027 |
| 104327_at   | 1433784_at   | Al265322      | expressed sequence Al265322                  | 1.04  | 0.91 | 1.64  | 0.0017 | 1.24  | 0.0301 | 1.67  | 0.0003 | 1.58  | 0.0024 |
| 104328_at   | 1424011_at   | Aqp9          | aquaporin 9                                  | 1.21  | 0.28 | 1.13  | 0.0288 | 1.24  | 0.0067 | 1.27  | 0.0012 | 1.11  | 0.2005 |
| 104331_at   | 1448709_at   | Arid1a        | AT rich interactive domain 1A (Swi1 like)    | -1.04 | 0.92 | 1.25  | 0.0001 | 1.34  | 0.0165 | 1.21  | 0.0018 | 1.47  | 0.0064 |
| 104332_at   | 1423769_at   | Ptcd2         | pentatricopeptide repeat domain 2            | 1.32  | 0.15 | 1.05  | 0.3039 | 1.21  | 0.0599 | 1.03  | 0.4961 | -1.22 | 0.3058 |
| 104333_at   | 1417822_at   | D17H6S56E-5   | DNA segment, Chr 17, human D6S56E 5          | 1.95  | 0.42 | 1.49  | 0.3012 | -1.82 | 0.0056 | 3.92  | 0.0824 | -1.1  | 0.6352 |
| 104334_at   | 1450987_a_at | 2310004I24Rik | RIKEN cDNA 2310004I24 gene                   | 1.15  | 0.11 | 1.2   | 0.0165 | 1.2   | 0.0292 | 1.26  | 0.0143 | 1.35  | 0.0207 |
| 104335_at   | 1416199_at   | Kifc3         | kinesin family member C3                     | -2.82 | 0.1  | -1.59 | 0.1928 | -1.19 | 0.5461 | -1.18 | 0.6707 | -1.33 | 0.4185 |
| 104336_at   | 1424841_s_at | Rbks          | ribokinase                                   | 1.07  | 0.78 | 1.3   | 0.0328 | 1.29  | 0.0305 | 1.21  | 0.1469 | -1.04 | 0.8411 |
| 104337_f_at | 1449799_s_at | Pkp2          | plakophilin 2                                | 1.06  | 0.87 | -1.21 | 0.1312 | -1    | 0.977  | -1.24 | 0.1055 | -1.35 | 0.0955 |
| 104339_at   | 1428249_at   | Pygopus2      | pygopus 2                                    | 1.05  | 0.84 | -1.08 | 0.3409 | 1.05  | 0.5327 | -1.05 | 0.4317 | 1.12  | 0.5486 |
| 104340_at   | 1417968_a_at | Mbd1          | methyl-CpG binding domain protein 1          | 1.15  | 0.29 | 1.03  | 0.8026 | 1.34  | 0.078  | 1.17  | 0.1666 | -1.28 | 0.1139 |
| 104341_at   | 1431299_a_at | 2310014H01Rik | RIKEN cDNA 2310014H01 gene                   | -1.51 | 0.09 | -1.03 | 0.7297 | -1.15 | 0.1379 | -1.15 | 0.0502 | 1.22  | 0.1971 |
| 104344_at   | 1449034_at   | Klk1b1        | kallikrein B, plasma 1                       | 1.35  | 0.24 | -1.02 | 0.8038 | 1.18  | 0.0367 | -1.07 | 0.3442 | -1.27 | 0.0307 |
| 104345_at   | 1434865_a_at | Exoc7         | exocyst complex component 7                  | 1.83  | 0.13 | -1.32 | 0.0008 | -1.09 | 0.3271 | -1.02 | 0.78   | 1.25  | 0.0094 |
| 104348_at   | 1426312_at   | Bre           | brain and reproductive organ-expressed pro   | 1.19  | 0.5  | -1.06 | 0.346  | -1.23 | 0.0174 | -1.11 | 0.1451 | -1.32 | 0.2304 |

|             |              |               |                                                 |       |      |       |        |       |        |       |        |       |        |
|-------------|--------------|---------------|-------------------------------------------------|-------|------|-------|--------|-------|--------|-------|--------|-------|--------|
| 104349_at   | 1428133_at   | MGI:2156003   | Smad nuclear interacting protein 1              | -1.2  | 0.13 | -1.03 | 0.65   | 1.11  | 0.0508 | -1.03 | 0.6771 | 1.3   | 0.0549 |
| 104350_at   | 1422854_at   | Shc1          | src homology 2 domain-containing transforr      | -1.16 | 0.62 | -1.13 | 0.0646 | -1.01 | 0.9005 | -1.04 | 0.5253 | -1.29 | 0.1057 |
| 104351_at   | 1439030_at   | Gmpbb         | GDP-mannose pyrophosphorylase B                 | -1.07 | 0.76 | -1.78 | 0.0235 | 1.31  | 0.396  | -1.82 | 0.019  | -1.29 | 0.4339 |
| 104352_at   | 1450711_at   | Brd4          | bromodomain containing 4                        | -1.36 | 0.17 | 1.21  | 0.3321 | 1.23  | 0.2423 | 1.32  | 0.0855 | 1.31  | 0.2245 |
| 104354_at   | 1423593_a_at | Csf1r         | colony stimulating factor 1 receptor            | 1.1   | 0.44 | 1.11  | 0.598  | -1.1  | 0.3564 | 1.32  | 0.4279 | 1.09  | 0.6914 |
| 104356_at   | 1451509_at   | Taf9          | TAF9 RNA polymerase II, TATA box binding        | 1.89  | 0.15 | -1.01 | 0.9313 | 1.3   | 0.0413 | 1.18  | 0.2743 | 1.55  | 0.066  |
| 104358_at   | 1426855_at   | D10Ert610e    | DNA segment, Chr 10, ERATO Doi 610, exp         | -1.15 | 0.76 | -1.02 | 0.8623 | 1.12  | 0.2834 | -1.01 | 0.941  | 1.26  | 0.28   |
| 104360_at   | 1460735_at   | Svil          | supervillin                                     | -1.27 | 0.01 | -1.26 | 0.0016 | -1.15 | 0.0414 | -1.29 | 0.0005 | -1.22 | 0.0516 |
| 104362_at   | 1433765_at   | B230113M03Rik | RIKEN cDNA B230113M03 gene                      | -1.58 | 0.04 | -1.07 | 0.2641 | -1.14 | 0.0609 | -1.18 | 0.0338 | 1.18  | 0.2725 |
| 104363_at   | 1435191_at   | Cdsn          | corneodesmosin                                  | -1.28 | 0.51 | -1.03 | 0.874  | 1.1   | 0.5606 | -1.27 | 0.2239 | 1.22  | 0.1591 |
| 104364_at   | 1417016_at   | Mapkapk5      | MAP kinase-activated protein kinase 5           | 1.34  | 0.34 | -1.04 | 0.5279 | 1.05  | 0.5326 | -1.07 | 0.3158 | -1.34 | 0.2309 |
| 104365_at   | 1416611_at   | Scamp2        | secretory carrier membrane protein 2            | 1.51  | 0.17 | 1.13  | 0.125  | -1.03 | 0.7685 | 1.18  | 0.0445 | -1.26 | 0.1923 |
| 104366_at   | 1435087_at   | BC039093      | cDNA sequence BC039093                          | 1.17  | 0.55 | -1.06 | 0.3372 | -1.19 | 0.0104 | 1.08  | 0.351  | 1.28  | 0.2264 |
| 104367_at   | 1419252_at   | ---           | ---                                             | -1.61 | 0    | -1.37 | 0.0137 | 1.15  | 0.3675 | -1.19 | 0.0832 | -1.95 | 0.0169 |
| 104368_at   | 1427079_at   | Mapre3        | microtubule-associated protein, RP/EB famil     | -1.08 | 0.7  | -1.04 | 0.7589 | 1.08  | 0.4267 | 1.12  | 0.0753 | -1.11 | 0.5484 |
| 104369_at   | 1422784_at   | Krt2-6a       | keratin complex 2, basic, gene 6a               | -1.53 | 0.01 | -1    | 0.9813 | -1    | 0.97   | -1.01 | 0.922  | 1.11  | 0.356  |
| 104370_s_at | 1427700_x_at | Krt2-6a       | keratin complex 2, basic, gene 6a               | -1.02 | 0.91 | 1.19  | 0.3583 | -1.34 | 0.2556 | 1.17  | 0.3976 | 1.2   | 0.4167 |
| 104371_at   | 1418295_s_at | Dgat1         | diacylglycerol O-acyltransferase 1              | 1.58  | 0.01 | 1.08  | 0.4353 | -1.03 | 0.8069 | 1.12  | 0.2232 | 1.08  | 0.6193 |
| 104372_at   | 1416863_at   | Abhd8         | abhydrolase domain containing 8                 | 1.31  | 0.6  | 1.79  | 0.122  | 1.54  | 0.1155 | 1.27  | 0.379  | 1.33  | 0.3384 |
| 104374_at   | 1419100_at   | Serpina3n     | serine (or cysteine) proteinase inhibitor, clac | 1.2   | 0.34 | 1.26  | 0.011  | -1.01 | 0.9103 | 1.15  | 0.1717 | 1.38  | 0.0184 |
| 104375_at   | 1435026_at   | Spock2        | sparc/osteonectin, cwcv and kazal-like domc     | 1.09  | 0.6  | -1.08 | 0.5276 | -1.06 | 0.6505 | -1.09 | 0.4997 | -1.46 | 0.3592 |
| 104376_at   | 1415743_at   | Hdac5         | histone deacetylase 5                           | -1.43 | 0.13 | -1.26 | 0.0091 | -1.2  | 0.0372 | -1.21 | 0.0212 | -1.08 | 0.3225 |
| 104378_at   | 1450686_at   | ---           | ---                                             | 1.19  | 0.19 | 1.09  | 0.1364 | 1.02  | 0.6349 | 1.11  | 0.0285 | -1.42 | 0.1078 |
| 104380_at   | 1417538_at   | Slc35a1       | solute carrier family 35 (CMP-sialic acid tran  | -1.04 | 0.68 | -1.09 | 0.1589 | -1.01 | 0.9512 | -1.21 | 0.0252 | -1.24 | 0.0714 |
| 104381_at   | 1450444_a_at | Nr1h3         | nuclear receptor subfamily 1, group H, mem      | 1.08  | 0.64 | -1.14 | 0.0256 | -1.17 | 0.0101 | -1.23 | 0.0003 | 1.06  | 0.5414 |
| 104383_at   | 1448289_at   | Crmp1         | collapsin response mediator protein 1           | -1.45 | 0.42 | -1.76 | 0.0785 | -1.38 | 0.2601 | -1.19 | 0.5617 | -1.94 | 0.1792 |
| 104386_f_at | 1452784_at   | Ilgav         | integrin alpha V                                | 1.19  | 0.33 | 1.04  | 0.4078 | 1.02  | 0.8209 | 1.08  | 0.2038 | 1.08  | 0.2106 |
| 104387_at   | 1450404_at   | Slc23a1       | solute carrier family 23 (nucleobase transpo    | 2.57  | 0.09 | -1.9  | 0.0001 | -1.25 | 0.1187 | -1.91 | 0.001  | -3.39 | 0.0186 |
| 104388_at   | 1417936_at   | ---           | ---                                             | -1.1  | 0.84 | 1.06  | 0.5893 | 1.06  | 0.386  | 1.15  | 0.2988 | 1.62  | 0.0009 |
| 104389_at   | 1429758_at   | 1700017B05Rik | RIKEN cDNA 1700017B05 gene                      | 1.37  | 0.04 | 1.02  | 0.8726 | 1.09  | 0.4514 | 1.21  | 0.138  | 1.77  | 0.0222 |
| 104390_at   | 1434555_at   | Anp32a        | acidic (leucine-rich) nuclear phosphoprotein    | -1    | 0.99 | 1.04  | 0.6351 | -1.13 | 0.0992 | -1.1  | 0.193  | -1.06 | 0.6096 |
| 104393_at   | 1418389_at   | 2810453106Rik | RIKEN cDNA 2810453106 gene                      | 2.45  | 0.02 | -1.53 | 0.1536 | -1.4  | 0.3087 | -1.04 | 0.8779 | 1.02  | 0.9727 |
| 104394_at   | 1416402_at   | Abcb10        | ATP-binding cassette, sub-family B (MDR/T,      | -1.1  | 0.28 | -1.09 | 0.281  | -1.05 | 0.6822 | -1.09 | 0.2908 | -1.63 | 0.159  |
| 104395_at   | 1435272_at   | Itpkb         | inositol 1,4,5-trisphosphate 3-kinase B         | -1.11 | 0.3  | -1.12 | 0.2275 | -1.03 | 0.6829 | -1.11 | 0.2147 | 1.1   | 0.2627 |
| 104396_at   | 1434017_at   | Znrf2         | zinc and ring finger 2                          | -1.32 | 0.02 | 1.05  | 0.5017 | 1.14  | 0.0629 | -1.14 | 0.0906 | -1.34 | 0.1017 |
| 104398_at   | 1455618_x_at | 1300010A20Rik | RIKEN cDNA 1300010A20 gene                      | -1.89 | 0    | -1.2  | 0.0426 | -1.14 | 0.2646 | -1.18 | 0.0376 | -1.21 | 0.0742 |
| 104399_at   | 1419645_at   | Cstf2         | cleavage stimulation factor, 3' pre-RNA subu    | 1.22  | 0.27 | -1.06 | 0.4278 | -1.01 | 0.9445 | -1.1  | 0.1174 | -1.25 | 0.1061 |
| 104401_at   | 1439803_at   | 6430526N21Rik | RIKEN cDNA 6430526N21 gene                      | -1.1  | 0.81 | -1.07 | 0.5066 | -1.1  | 0.3783 | -1.22 | 0.0865 | 1.31  | 0.3588 |
| 104402_at   | 1434320_at   | Gtf3c4        | general transcription factor IIIC, polypeptide  | 1.83  | 0.13 | -1.53 | 0.0238 | -1.1  | 0.6351 | -1.19 | 0.1534 | -1.61 | 0.3317 |
| 104403_at   | 1434162_at   | 2700078E11Rik | RIKEN cDNA 2700078E11 gene                      | 1.23  | 0.03 | 1.06  | 0.2754 | 1.06  | 0.3823 | 1.07  | 0.2229 | -1.47 | 0.0109 |
| 104405_at   | 1434953_at   | 4633402D15Rik | RIKEN cDNA 4633402D15 gene                      | 1.8   | 0.17 | -1.06 | 0.6694 | 1.03  | 0.8306 | -1.14 | 0.4147 | -1.27 | 0.4398 |
| 104406_at   | 1449450_at   | Ptges         | prostaglandin E synthase                        | 1.5   | 0.46 | -1.35 | 0.0434 | 1.08  | 0.3175 | -1.33 | 0.0515 | 1.74  | 0.0345 |
| 104407_at   | 1426301_at   | Alcam         | activated leukocyte cell adhesion molecule      | 1.41  | 0.27 | 1.49  | 0.0262 | -1.32 | 0.0151 | 1.16  | 0.3234 | 1.52  | 0.0157 |
| 104409_at   | 1418784_at   | Grik5         | glutamate receptor, ionotropic, kainate 5 (ga   | 1.45  | 0.29 | 1.2   | 0.1673 | -1.2  | 0.1979 | 1.03  | 0.8403 | -1.02 | 0.9319 |
| 104410_at   | 1449188_at   | Midn          | midnolin                                        | 1.28  | 0.05 | 1.06  | 0.3842 | -1.19 | 0.047  | 1     | 0.9868 | 1.27  | 0.0679 |
| 104411_at   | 1419893_at   | D930048N14Ril | RIKEN cDNA D930048N14 gene                      | -1.89 | 0.52 | -1.44 | 0.2274 | -1.02 | 0.9355 | -1.15 | 0.6017 | -1.11 | 0.7004 |
| 104412_at   | 1454959_s_at | Gnai1         | guanine nucleotide binding protein, alpha int   | -1.06 | 0.84 | -1.19 | 0.5773 | 1.17  | 0.5423 | -1.27 | 0.4449 | 1.4   | 0.1308 |
| 104413_at   | 1433595_at   | ---           | ---                                             | -1.19 | 0.3  | 1.23  | 0.0001 | 1.18  | 0.0263 | 1.31  | 0      | -1.45 | 0.0033 |
| 104414_at   | 1448031_at   | AW050213      | expressed sequence AW050213                     | -1.2  | 0.5  | -1.11 | 0.6923 | -1.16 | 0.3799 | -1.04 | 0.8856 | -1.27 | 0.6331 |
| 104415_at   | 1435221_at   | Foxp1         | Forkhead box P1                                 | 1.47  | 0.1  | 1.32  | 0.0538 | -1.11 | 0.5611 | 1.51  | 0.0106 | 1.72  | 0.2796 |
| 104416_at   | 1421442_at   | Flt4          | FMS-like tyrosine kinase 4                      | 1.2   | 0.69 | -1.19 | 0.3569 | 1.15  | 0.394  | -1.29 | 0.1828 | 1.08  | 0.7185 |
| 104417_at   | 1444052_at   | Flt4          | FMS-like tyrosine kinase 4                      | -1.04 | 0.77 | -1.02 | 0.7405 | 1.26  | 0.0016 | -1.11 | 0.3951 | 1.28  | 0.0504 |
| 104418_at   | 1455291_s_at | Znrf2         | zinc and ring finger 2                          | 1.01  | 0.96 | 1.05  | 0.6508 | 1.1   | 0.5078 | -1.03 | 0.8235 | -4.29 | 0.023  |

|             |              |               |                                                |        |      |       |        |       |        |       |        |       |        |
|-------------|--------------|---------------|------------------------------------------------|--------|------|-------|--------|-------|--------|-------|--------|-------|--------|
| 104419_at   | 1426903_at   | Fndc3a        | fibronectin type III domain containing 3a      | 1.08   | 0.67 | 1.29  | 0.017  | 1.1   | 0.4913 | 1.24  | 0.0101 | -1.05 | 0.6592 |
| 104421_at   | 1449525_at   | Fmo3          | flavin containing monooxygenase 3              | -2.84  | 0.23 | -4.45 | 0      | 1.14  | 0.1421 | -1.65 | 0.0008 | 45.85 | 0      |
| 104422_at   | 1416588_at   | Ptprn         | protein tyrosine phosphatase, receptor type,   | -1.23  | 0.03 | -1.05 | 0.6053 | -1.24 | 0.0025 | -1.2  | 0.0176 | 1.1   | 0.4318 |
| 104423_at   | 1434695_at   | ---           | ---                                            | 1.07   | 0.89 | 1.01  | 0.9747 | -1.64 | 0.2975 | -1.31 | 0.5208 | 1.5   | 0.3365 |
| 104424_at   | 1422815_at   | ---           | ---                                            | -2.88  | 0.04 | -1.29 | 0.1236 | -1.52 | 0.0001 | -1.32 | 0.1059 | -6.32 | 0      |
| 104425_at   | 1418983_at   | Inadl         | InaD-like (Drosophila)                         | 1.8    | 0.47 | -1.32 | 0.4424 | 1.85  | 0.1816 | 2.04  | 0.051  | -1.33 | 0.6035 |
| 104427_at   | 1443762_s_at | Mttr13        | myotubularin related protein 13                | -1.05  | 0.76 | 1.08  | 0.2139 | 1.09  | 0.3936 | 1.13  | 0.036  | 1.28  | 0.0087 |
| 104428_s_at | 1421739_a_at | Matk          | megakaryocyte-associated tyrosine kinase       | 1.37   | 0.5  | -1.49 | 0.0711 | -1.47 | 0.1421 | -1.26 | 0.2511 | -1.11 | 0.756  |
| 104430_at   | 1419226_at   | Cd96          | CD96 antigen                                   | -2.48  | 0.13 | 1.18  | 0.3966 | -1.04 | 0.7597 | 1.03  | 0.8563 | 1.17  | 0.5109 |
| 104434_at   | 1460733_at   | AA407659      | expressed sequence AA407659                    | -1.3   | 0.09 | 1.1   | 0.1945 | 1.09  | 0.4813 | -1.02 | 0.6524 | -1.12 | 0.4327 |
| 104436_at   | 1421370_a_at | Il1f5         | interleukin 1 family, member 5 (delta)         | -1.28  | 0.63 | 1.54  | 0.2673 | 1.47  | 0.2448 | 1.25  | 0.512  | 1.72  | 0.2765 |
| 104437_at   | 1449813_at   | Zfp30         | zinc finger protein 30                         | 1.33   | 0.46 | 1.24  | 0.0908 | 1.27  | 0.0403 | 1.12  | 0.3695 | 1.34  | 0.2384 |
| 104439_at   | 1419213_at   | Nat6          | N-acetyltransferase 6                          | -1.29  | 0    | -1.08 | 0.2524 | -1.1  | 0.3094 | -1.19 | 0.0365 | 1.04  | 0.7877 |
| 104440_at   | 1420762_a_at | Ybx2          | Y box protein 2                                | -1.33  | 0.12 | 1.17  | 0.3858 | -1.05 | 0.6617 | 1.15  | 0.306  | 1.21  | 0.2399 |
| 104442_at   | 1441992_at   | Rab14         | RAB14, member RAS oncogene family              | 1.83   | 0.06 | -1.01 | 0.9198 | -2.02 | 0.0088 | -1.56 | 0.0597 | 1.58  | 0.0997 |
| 104443_at   | 1423466_at   | Ccr7          | chemokine (C-C motif) receptor 7               | 2.02   | 0.08 | 1.66  | 0.1136 | 1.53  | 0.2413 | 1.12  | 0.7169 | 1.43  | 0.0769 |
| 104444_at   | 1425191_at   | 9430098E02Rik | RIKEN cDNA 9430098E02 gene                     | 1.17   | 0.07 | -1.03 | 0.6894 | -1.11 | 0.1996 | -1.06 | 0.4187 | -1.14 | 0.4468 |
| 104445_at   | 1429159_at   | 4631408O11Rik | RIKEN cDNA 4631408O11 gene                     | -1.36  | 0.06 | -1.03 | 0.6942 | 1.39  | 0.0512 | 1.15  | 0.3422 | 1.23  | 0.1941 |
| 104447_r_at | 1426253_at   | 4933428G09Rik | RIKEN cDNA 4933428G09 gene                     | -1.02  | 0.95 | 1.07  | 0.6429 | -1.18 | 0.3427 | 1.03  | 0.7643 | -1.05 | 0.8742 |
| 104449_at   | 1422504_at   | Glr1b         | glycine receptor, beta subunit                 | 1.3    | 0.48 | -1.29 | 0.2082 | 1.02  | 0.9313 | -1.08 | 0.5855 | 1.44  | 0.196  |
| 104450_at   | 1425971_at   | LOC277923     | reverse transcriptase                          | -1.15  | 0.76 | -1.25 | 0.5728 | -1.47 | 0.3951 | -1.03 | 0.9479 | 1.07  | 0.8187 |
| 104451_at   | 1426441_at   | Slc11a2       | solute carrier family 11 (proton-coupled diva  | -1.41  | 0.25 | -1.08 | 0.5876 | 1.07  | 0.5025 | 1.07  | 0.5884 | -1.55 | 0.028  |
| 104453_at   | 1415718_at   | 2310079P12Rik | RIKEN cDNA 2310079P12 gene                     | 1.1    | 0.65 | -1.16 | 0.1242 | 1.02  | 0.845  | -1.06 | 0.5989 | 1.29  | 0.0344 |
| 104454_at   | 1423539_at   | Pms2          | postmeiotic segregation increased 2 (S. cere   | 1.79   | 0.39 | -1.12 | 0.4033 | -1.18 | 0.3615 | -1.25 | 0.0738 | 2.84  | 0.0977 |
| 104455_at   | 1421941_at   | Camk4         | calcium/calmodulin-dependent protein kinas     | -1.43  | 0.58 | 1.15  | 0.4296 | 1.11  | 0.6734 | -1.01 | 0.963  | 1.32  | 0.1734 |
| 104456_at   | 1436049_at   | Mettl3        | Methyltransferase-like 3                       | 1.2    | 0.55 | 1.01  | 0.9428 | 1.16  | 0.2441 | 1.18  | 0.0829 | -1.16 | 0.5318 |
| 104457_at   | 1448011_at   | ---           | ---                                            | 2.29   | 0.12 | -1.46 | 0.2369 | -1.59 | 0.1475 | -1.44 | 0.3116 | -1.05 | 0.8938 |
| 104458_at   | 1436207_at   | Tcf3          | Transcription factor 3                         | -1.02  | 0.93 | 1.7   | 0.0012 | 1.58  | 0.0059 | 1.54  | 0.0456 | 2.12  | 0.0076 |
| 104460_at   | 1423365_at   | Cacna1g       | calcium channel, voltage-dependent, T type,    | -1.29  | 0.23 | 1.01  | 0.9162 | 1.27  | 0.1645 | -1.13 | 0.1571 | 1.13  | 0.5144 |
| 104461_at   | 1460326_at   | Pik3ca        | phosphatidylinositol 3-kinase, catalytic, alph | -1.04  | 0.85 | 1.17  | 0.0878 | 1.26  | 0.0063 | 1.29  | 0.0113 | 1.61  | 0.0101 |
| 104462_at   | 1449226_at   | Hic1          | hypermethylated in cancer 1                    | -1.39  | 0.68 | -1.09 | 0.6487 | -1.11 | 0.6259 | -1.33 | 0.1152 | -1.13 | 0.7926 |
| 104463_at   | 1452252_at   | 3830408P06Rik | RIKEN cDNA 3830408P06 gene                     | 1.11   | 0.52 | -1.24 | 0.0031 | -1    | 0.9604 | -1.28 | 0.0008 | 1.11  | 0.2869 |
| 104464_s_at | 1418538_at   | Kdelr3        | KDEL (Lys-Asp-Glu-Leu) endoplasmic reticu      | 2      | 0.06 | 1.1   | 0.5334 | 1.12  | 0.4578 | 1.01  | 0.953  | 1.22  | 0.7907 |
| 104466_at   | 1448599_s_at | D4Wsu114e     | DNA segment, Chr 4, Wayne State Universi       | 1.5    | 0.01 | 1.89  | 0.0298 | 1.83  | 0.0087 | 2.69  | 0      | 2.17  | 0.2631 |
| 104468_at   | 1423093_at   | Incnp         | inner centromere protein                       | -1.21  | 0.4  | -1.04 | 0.7567 | 1.01  | 0.8801 | -1.1  | 0.1912 | 1.46  | 0.1896 |
| 104469_at   | 1419309_at   | Gp38          | glycoprotein 38                                | -1.07  | 0.88 | 1.8   | 0.0013 | 1.76  | 0.0543 | 1.51  | 0.0171 | 1.64  | 0.2301 |
| 104471_at   | 1448928_at   | Hdac6         | histone deacetylase 6                          | 1.3    | 0.21 | 1.1   | 0.2372 | 1.15  | 0.0735 | 1.06  | 0.3616 | 1.4   | 0.0002 |
| 104474_s_at | 1426204_a_at | Opr11         | opioid receptor-like 1                         | -1.63  | 0.04 | 1.25  | 0.404  | 1.21  | 0.3192 | 1.25  | 0.3294 | 1.09  | 0.7058 |
| 104475_at   | 1434104_at   | 6030458H05    | hypothetical protein 6030458H05                | 1.83   | 0.36 | -1.07 | 0.5594 | -1.17 | 0.2171 | -1.13 | 0.2044 | -1.5  | 0.1053 |
| 104476_at   | 1424156_at   | Rbl1          | retinoblastoma-like 1 (p107)                   | 5.71   | 0.03 | 1.66  | 0.1908 | 1.43  | 0.0026 | 1.81  | 0.0889 | 1.89  | 0.0099 |
| 104477_at   | 1448021_at   | ---           | Transcribed locus                              | 1.22   | 0.54 | -1.08 | 0.6776 | 1.09  | 0.5301 | 1.14  | 0.4823 | -1.24 | 0.6482 |
| 104479_at   | 1450318_a_at | P2ry2         | purinergic receptor P2Y, G-protein coupled :   | 1.33   | 0.23 | 1.03  | 0.7396 | 1.66  | 0.0365 | 1.15  | 0.1763 | -1.23 | 0.1727 |
| 104480_at   | 1449740_s_at | Dsg2          | desmoglein 2                                   | -2.03  | 0.05 | -1.43 | 0.0002 | -1.13 | 0.119  | -1.47 | 0.0002 | 1.08  | 0.7491 |
| 104482_at   | 1418164_at   | Epim          | epimorphin                                     | -1.24  | 0.62 | 1.11  | 0.2958 | -1.33 | 0.0488 | -1.36 | 0.0395 | -1.29 | 0.3195 |
| 104483_at   | 1421381_a_at | Col9a1        | procollagen, type IX, alpha 1                  | -1.22  | 0.66 | 1.04  | 0.8575 | -1.17 | 0.6081 | -1.14 | 0.6426 | 1.65  | 0.2967 |
| 104484_at   | 1419528_at   | Sult2a2       | sulfotransferase family 2A, dehydroepiandro    | 137.12 | 0    | -1.04 | 0.6163 | -1.02 | 0.7614 | -1.32 | 0.0374 | 16.38 | 0.0027 |
| 104485_at   | 1452523_a_at | 4930527D15Rik | RIKEN cDNA 4930527D15 gene                     | 1.67   | 0.38 | -1.23 | 0.4812 | -1.43 | 0.3027 | -1.48 | 0.2111 | -1.03 | 0.867  |
| 104486_at   | 1434719_at   | A2m           | alpha-2-macroglobulin                          | -3.49  | 0.13 | -1.15 | 0.6233 | -1.18 | 0.6484 | -1.65 | 0.1001 | -1    | 0.9954 |
| 104487_at   | 1440252_at   | E130307C13    | Hypothetical protein E130307C13                | 1.34   | 0.54 | 1.06  | 0.8582 | 1.41  | 0.2995 | 1.52  | 0.1895 | 3.34  | 0.0915 |
| 104488_at   | 1427070_at   | 5730407K14Rik | RIKEN cDNA 5730407K14 gene                     | -1.03  | 0.89 | 1.18  | 0.3266 | 1.01  | 0.9379 | 1.03  | 0.867  | 1.61  | 0.1171 |
| 104489_at   | 1420371_at   | Sntb2         | syntrophin, basic 2                            | -2.78  | 0.08 | 1.21  | 0.3759 | -1.02 | 0.9012 | 1.08  | 0.5811 | 1.57  | 0.0543 |
| 104491_at   | 1437067_at   | Phtf2         | putative homeodomain transcription factor 2    | 1.44   | 0.33 | 1.22  | 0.1361 | 1.25  | 0.1525 | 1.4   | 0.0445 | 1.23  | 0.388  |
| 104492_at   | 1460666_a_at | Ebf3          | early B-cell factor 3                          | -1.41  | 0.28 | -1.19 | 0.0745 | -1.07 | 0.4853 | -1.12 | 0.2062 | 1.09  | 0.3136 |

|             |              |               |                                                |       |      |       |        |       |        |       |        |       |        |
|-------------|--------------|---------------|------------------------------------------------|-------|------|-------|--------|-------|--------|-------|--------|-------|--------|
| 104493_at   | 1425433_a_at | Nrp2          | neuropilin 2                                   | -1.56 | 0.39 | -1.52 | 0.1306 | -1.91 | 0.0176 | -1.63 | 0.0945 | 2.9   | 0.363  |
| 104494_at   | 1454736_at   | 4921515A04Rik | RIKEN cDNA 4921515A04 gene                     | 1.05  | 0.54 | 1.13  | 0.4806 | 1.04  | 0.7736 | 1.28  | 0.0823 | -1.13 | 0.1075 |
| 104495_f_at | 1449313_at   | Klk5          | kallikrein 5                                   | 1.3   | 0.7  | -1.24 | 0.3222 | 1.48  | 0.3173 | 1.02  | 0.9432 | -1.35 | 0.5743 |
| 104497_f_at | 1449463_at   | Klk8          | kallikrein 8                                   | 1.05  | 0.94 | 1.03  | 0.887  | 1.01  | 0.9711 | -1.08 | 0.7215 | 1.48  | 0.1739 |
| 104498_at   | 1425671_at   | Homer1        | homer homolog 1 (Drosophila)                   | -1.08 | 0.88 | 1.09  | 0.8177 | -1.12 | 0.7925 | -1.48 | 0.4039 | -1.89 | 0.4082 |
| 104499_at   | 1425710_a_at | Homer1        | homer homolog 1 (Drosophila)                   | 1.27  | 0.39 | 1.11  | 0.7678 | -1.06 | 0.866  | -1.11 | 0.7735 | 1.69  | 0.0361 |
| 104500_at   | 1418793_at   | Idua          | iduronidase, alpha-L-                          | 1.38  | 0.41 | 1.4   | 0.0114 | 1.19  | 0.1902 | 1.57  | 0.0016 | 1.73  | 0.034  |
| 104501_at   | 1436079_s_at | Vapb          | vesicle-associated membrane protein, assoc     | -1.16 | 0.64 | -1.08 | 0.4545 | 1.11  | 0.3316 | -1.1  | 0.3021 | 1.33  | 0.085  |
| 104504_at   | 1451894_a_at | Scn8a         | sodium channel, voltage-gated, type VIII, al   | 1.04  | 0.93 | -1.3  | 0.2884 | 1.19  | 0.4167 | 1.1   | 0.6855 | 1.02  | 0.9037 |
| 104507_g_at | 1425392_a_at | Nr1i3         | nuclear receptor subfamily 1, group I, memb    | 1.25  | 0.23 | 1.25  | 0.0351 | 1.19  | 0.0586 | 1.26  | 0.0012 | 2.21  | 0.0004 |
| 104508_at   | 1428787_at   | 4930568P13Rik | RIKEN cDNA 4930568P13 gene                     | -1.65 | 0.15 | 1.54  | 0.0049 | 1.19  | 0.1594 | 1.37  | 0.0937 | 1.46  | 0.0518 |
| 104509_at   | 1449227_at   | Ch25h         | cholesterol 25-hydroxylase                     | -1.14 | 0.85 | 1.08  | 0.7643 | -1.19 | 0.3635 | 1.22  | 0.3769 | 1.57  | 0.1547 |
| 104510_at   | 1449999_a_at | Cacna2d1      | calcium channel, voltage-dependent, alpha2     | -3.44 | 0.16 | 1.09  | 0.3139 | -1.01 | 0.9466 | -1.04 | 0.7202 | 2.12  | 0.072  |
| 104512_at   | 1454881_s_at | Upk3b         | uroplakin 3B                                   | 1.26  | 0.22 | -1.19 | 0.1833 | -1.37 | 0.0045 | -1.26 | 0.0486 | 1.45  | 0.1579 |
| 104514_at   | 1427039_at   | Epn1          | epsin 1                                        | -1.27 | 0.09 | 1.02  | 0.6766 | 1.03  | 0.4919 | -1.05 | 0.2964 | 1.36  | 0.031  |
| 104516_at   | 1417839_at   | Cldn5         | claudin 5                                      | 2.39  | 0.01 | 1.21  | 0.0617 | -1.09 | 0.6459 | 1.11  | 0.5135 | 1.75  | 0.0834 |
| 104518_at   | 1450671_at   | Cryba1        | crystallin, beta A1                            | -1.36 | 0.39 | -1.12 | 0.4675 | 1.31  | 0.2028 | -1.07 | 0.6358 | 1.85  | 0.1569 |
| 104519_at   | 1417618_at   | Itih2         | inter-alpha trypsin inhibitor, heavy chain 2   | -1.09 | 0.68 | -1.01 | 0.8814 | 1.03  | 0.4663 | 1     | 0.9106 | 1.26  | 0.0254 |
| 104522_at   | 1452338_s_at | Itsn1         | intersectin 1 (SH3 domain protein 1A)          | 1.06  | 0.4  | -1.06 | 0.167  | -1.07 | 0.5178 | -1.06 | 0.2981 | 1.08  | 0.4422 |
| 104523_at   | 1423614_at   | E430036I04Rik | RIKEN cDNA E430036I04 gene                     | -2.48 | 0.01 | 1.44  | 0.0828 | 1.03  | 0.9118 | 1.49  | 0.1456 | 1.59  | 0.3482 |
| 104525_at   | 1428351_at   | Ppm1m         | protein phosphatase 1M                         | 1.01  | 0.95 | -1.09 | 0.2685 | -1.01 | 0.9025 | -1.14 | 0.0443 | 1.31  | 0.1532 |
| 104526_at   | 1422566_at   | Tcfeb         | transcription factor EB                        | -1.47 | 0.32 | 1.22  | 0.4856 | -1.2  | 0.4306 | -1.12 | 0.6564 | 2.08  | 0.1878 |
| 104527_at   | 1418281_at   | Rad51         | RAD51 homolog (S. cerevisiae)                  | 1.18  | 0.72 | -1.01 | 0.9428 | 1.01  | 0.937  | -1.09 | 0.6816 | -1.01 | 0.9768 |
| 104528_at   | 1416651_at   | Znhit2        | zinc finger, HIT domain containing 2           | 1.1   | 0.49 | 1.07  | 0.3779 | 1.02  | 0.7879 | 1.01  | 0.7677 | 1.01  | 0.9469 |
| 104529_at   | 1417842_at   | Caml          | calcium modulating ligand                      | -1.02 | 0.9  | -1.02 | 0.8328 | -1.04 | 0.7104 | -1.08 | 0.4175 | -1.42 | 0.1651 |
| 104532_at   | 1448345_at   | Tom34         | translocase of outer mitochondrial membran     | 1.31  | 0.51 | 1.46  | 0.0022 | 1.33  | 0.0739 | 1.47  | 0.0309 | 1.14  | 0.0638 |
| 104533_at   | 1435458_at   | ---           | ---                                            | -1.53 | 0.33 | 1.12  | 0.4547 | -1.32 | 0.0034 | 1.05  | 0.6811 | -1.81 | 0.0024 |
| 104535_at   | 1423360_at   | Yme1l1        | YME1-like 1 (S. cerevisiae)                    | -1.21 | 0.25 | -1.15 | 0.0472 | -1.14 | 0.1445 | -1.12 | 0.1463 | -1.46 | 0.1034 |
| 104536_at   | 1420634_a_at | Smad2         | MAD homolog 2 (Drosophila)                     | 1.59  | 0.08 | 1.04  | 0.6245 | 1.15  | 0.1072 | 1.05  | 0.527  | -1.12 | 0.033  |
| 104537_at   | 1424505_at   | 0610042C05Rik | RIKEN cDNA 0610042C05 gene                     | 2.59  | 0.12 | 1.07  | 0.4164 | -1.08 | 0.4282 | 1.11  | 0.3257 | 1.19  | 0.1585 |
| 104538_at   | 1448816_at   | Ptgis         | prostaglandin I2 (prostacyclin) synthase       | -1.14 | 0.69 | -1.85 | 0.0081 | -1.71 | 0.0282 | -1.71 | 0.0068 | 1.75  | 0.1961 |
| 104539_at   | 1418940_at   | Sult1b1       | sulfotransferase family 1B, member 1           | 1.37  | 0.23 | -1.21 | 0.0441 | -1.11 | 0.5378 | -1.19 | 0.2042 | -1.53 | 0.0598 |
| 104541_at   | 1419669_at   | Prtn3         | proteinase 3                                   | -1.69 | 0.4  | -1.03 | 0.8922 | -1.11 | 0.5105 | 1.36  | 0.3177 | -1.69 | 0.5657 |
| 104544_at   | 1423327_at   | 4930517K11Rik | RIKEN cDNA 4930517K11 gene                     | -2.2  | 0.48 | 2     | 0.0587 | 1.3   | 0.3551 | 1.29  | 0.389  | -1.07 | 0.8809 |
| 104546_g_at | 1419035_s_at | Csnk2a1       | casein kinase II, alpha 1 polypeptide          | 2.82  | 0.09 | 1.03  | 0.901  | -1.42 | 0.1986 | -1.38 | 0.2236 | -1.29 | 0.4162 |
| 104547_at   | 1419172_at   | Dhfr          | dihydrofolate reductase                        | 1.66  | 0.03 | 1.16  | 0.1175 | -1.06 | 0.4706 | 1.23  | 0.0646 | -1.04 | 0.6281 |
| 104548_at   | 1417837_at   | Phlda2        | pleckstrin homology-like domain, family A, r   | 2.4   | 0.05 | 1.23  | 0.2031 | 1.03  | 0.8715 | 1.31  | 0.0543 | 1.44  | 0.0153 |
| 104549_at   | 1433497_at   | Aqr           | aquarius                                       | -1.09 | 0.2  | 1.06  | 0.6312 | 1.03  | 0.7211 | 1.17  | 0.058  | 1.13  | 0.3698 |
| 104550_at   | 1428283_at   | Cyp2s1        | cytochrome P450, family 2, subfamily s, poly   | 1.02  | 0.8  | -1.01 | 0.9534 | -1.24 | 0.2072 | 1.03  | 0.9067 | -1.12 | 0.7192 |
| 104554_at   | 1460648_at   | Nr2f6         | nuclear receptor subfamily 2, group F, memb    | -1.43 | 0.01 | -1.17 | 0.007  | -1.01 | 0.9352 | -1.17 | 0.0046 | -1.22 | 0.169  |
| 104555_at   | 1460202_at   | Myoz1         | myozenin 1                                     | -1.43 | 0.62 | -1.25 | 0.3928 | 1.01  | 0.9586 | -1.02 | 0.9224 | 1.45  | 0.4199 |
| 104557_at   | 1420307_a_at | Pitpnb        | phosphatidylinositol transfer protein, beta    | 1.15  | 0.68 | 1.03  | 0.3864 | -1.02 | 0.877  | -1    | 0.9996 | -1.1  | 0.132  |
| 104558_at   | 1454932_at   | Rcor1         | REST corepressor 1                             | 1.22  | 0.28 | 1.22  | 0.0134 | 1.47  | 0.0602 | 1.18  | 0.0503 | -1.29 | 0.0936 |
| 104559_at   | 1460690_at   | BC003940      | cDNA sequence BC003940                         | -1.86 | 0.05 | -1.07 | 0.24   | -1.14 | 0.0695 | -1.03 | 0.5189 | 1.17  | 0.0372 |
| 104560_at   | 1424776_a_at | Slc25a28      | solute carrier family 25, member 28            | 1.48  | 0.02 | -1.07 | 0.4666 | 1.08  | 0.4535 | -1.03 | 0.7139 | -1.07 | 0.6048 |
| 104561_at   | 1423998_at   | Gtf3c5        | general transcription factor IIIC, polypeptide | -1.05 | 0.79 | 1.58  | 0.0254 | 1.39  | 0.0936 | 1.37  | 0.1457 | 1.51  | 0.0228 |
| 104562_at   | 1434343_at   | 5730403M16Rik | RIKEN cDNA 5730403M16 gene                     | 1.19  | 0.31 | -1.18 | 0.0153 | 1     | 0.9474 | -1.16 | 0.0076 | 1.27  | 0.0451 |
| 104564_at   | 1448628_at   | Scg3          | secretogranin III                              | -1.69 | 0.17 | -1.14 | 0.5007 | -1.15 | 0.4196 | -1.01 | 0.9577 | 1.2   | 0.4239 |
| 104565_at   | 1451665_a_at | Ap4s1         | adaptor-related protein complex AP-4, sigma    | 1.57  | 0.13 | -1.1  | 0.288  | 1.18  | 0.2137 | -1.04 | 0.5793 | -1.32 | 0.0026 |
| 104567_at   | 1449004_at   | Mrp146        | mitochondrial ribosomal protein L46            | 1.45  | 0.05 | -1.03 | 0.7536 | 1.07  | 0.4225 | -1.03 | 0.747  | -1.02 | 0.8879 |
| 104568_at   | 1427283_at   | Mll           | myeloid/lymphoid or mixed-lineage leukemia     | -1.18 | 0.5  | -1.25 | 0.0215 | -1.11 | 0.0952 | -1.16 | 0.0149 | 1.37  | 0.0908 |
| 104572_at   | 1433910_at   | Zcchc6        | zinc finger, CCHC domain containing 6          | -1.21 | 0.23 | 1.1   | 0.1779 | 1.14  | 0.1009 | 1.05  | 0.3664 | -1.27 | 0.0785 |
| 104573_at   | 1434545_x_at | 1110025L05Rik | RIKEN cDNA 1110025L05 gene                     | -1.1  | 0.78 | 1.13  | 0.0662 | 1.2   | 0.0185 | 1.23  | 0.0058 | -1.08 | 0.7156 |

|             |              |                  |                                                |       |      |       |        |       |        |       |        |       |        |
|-------------|--------------|------------------|------------------------------------------------|-------|------|-------|--------|-------|--------|-------|--------|-------|--------|
| 104574_at   | 1415730_at   | 573045316Rik     | RIKEN cDNA 573045316 gene                      | -1.08 | 0.2  | -1.09 | 0.2003 | 1.01  | 0.9034 | 1.01  | 0.8641 | 1.18  | 0.0973 |
| 104576_at   | 1426373_at   | Ski              | Sloan-Kettering viral oncogene homolog         | -1.08 | 0.37 | -1.26 | 0.0046 | -1.16 | 0.0635 | -1.36 | 0.0002 | -1.24 | 0.0212 |
| 104577_at   | 1417360_at   | Mlh1             | mutL homolog 1 (E. coli)                       | 1.18  | 0.53 | 1.07  | 0.4301 | -1.1  | 0.1988 | -1.03 | 0.6718 | -1.22 | 0.2028 |
| 104579_r_at | 1428585_at   | Actn1            | actinin, alpha 1                               | 2.24  | 0.03 | 1.68  | 0.0015 | 1.3   | 0.0513 | 1.78  | 0.0003 | 1.55  | 0.036  |
| 104580_at   | 1448432_at   | Plcd1            | phospholipase C, delta 1                       | -1.15 | 0.64 | 1.26  | 0.4035 | 1.52  | 0.2337 | 1.15  | 0.7206 | 1.36  | 0.3922 |
| 104583_at   | 1423300_at   | Zdhhc6           | zinc finger, DHHC domain containing 6          | 1.34  | 0.08 | -1.18 | 0.0405 | -1.19 | 0.0443 | -1.1  | 0.1807 | -1.66 | 0.0075 |
| 104584_f_at | 1434851_s_at | Crb3             | crumbs homolog 3 (Drosophila)                  | 1.28  | 0.46 | -1.13 | 0.4368 | 1.18  | 0.2983 | -1.07 | 0.7312 | -1.06 | 0.9437 |
| 104585_at   | 1424809_at   | Crb3             | crumbs homolog 3 (Drosophila)                  | -1.29 | 0.09 | 1.06  | 0.5974 | -1    | 0.9745 | -1.04 | 0.6428 | 1.31  | 0.1018 |
| 104586_at   | 1428100_at   | Sfrs1            | splicing factor, arginine/serine-rich 1 (ASF/S | 1.15  | 0.26 | -1.02 | 0.7748 | -1.09 | 0.3101 | -1.09 | 0.1447 | -1.35 | 0.004  |
| 104587_at   | 1424807_at   | Lama4            | laminin, alpha 4                               | 1.41  | 0.04 | -1.05 | 0.691  | -1.05 | 0.6396 | -1    | 0.9756 | 1.76  | 0.0829 |
| 104588_at   | 1419197_x_at | Hamp1            | hepcidin antimicrobial peptide 1               | 1.52  | 0.32 | 1.07  | 0.2774 | -1.16 | 0.0289 | -1.03 | 0.7886 | -2.01 | 0.0014 |
| 104589_at   | 1419273_at   | C80913           | expressed sequence C80913                      | -1.17 | 0.52 | 1.38  | 0.0114 | -1.02 | 0.8957 | 1.36  | 0.0496 | 1.38  | 0.0587 |
| 104592_i_at | 1421028_a_at | Mef2c            | myocyte enhancer factor 2C                     | -2.13 | 0.22 | 1.38  | 0.1516 | 1.08  | 0.5848 | -1.07 | 0.667  | 1.34  | 0.2334 |
| 104593_at   | 1451167_at   | 1700023O11Rik    | RIKEN cDNA 1700023O11 gene                     | 1.85  | 0.06 | 1.05  | 0.5947 | 1.08  | 0.5013 | 1.14  | 0.2626 | 1.23  | 0.6641 |
| 104595_at   | 1421849_at   | Stag2            | stromal antigen 2                              | 1.17  | 0.62 | 1.3   | 0.0104 | 1.33  | 0.0615 | 1.61  | 0.001  | 1.51  | 0.0445 |
| 104597_at   | 1418240_at   | Gbp2             | guanylate nucleotide binding protein 2         | 1.77  | 0.03 | 4.98  | 0.1955 | -1.7  | 0.0745 | 5.74  | 0.1072 | 6.31  | 0.0693 |
| 104598_at   | 1448830_at   | Dusp1            | dual specificity phosphatase 1                 | -1.27 | 0.44 | 1.36  | 0.2523 | -1.26 | 0.1872 | 1.04  | 0.8201 | -1.26 | 0.0644 |
| 104600_at   | 1452720_a_at | Fip111           | FIP1 like 1 (S. cerevisiae)                    | 1.55  | 0.14 | 1.29  | 0.0503 | 1.5   | 0.0004 | 1.41  | 0.0029 | 1.5   | 0.3692 |
| 104601_at   | 1448529_at   | Thbd             | thrombomodulin                                 | -1.44 | 0.62 | -1.55 | 0.2332 | -1.34 | 0.437  | -1.31 | 0.3907 | 2.28  | 0.3598 |
| 104603_at   | 1417883_at   | Gstt2            | glutathione S-transferase, theta 2             | 2.93  | 0.03 | 1.22  | 0.0626 | 1.63  | 0.0001 | 1.54  | 0.0077 | 2.14  | 0.0192 |
| 104604_at   | 1451281_at   | Zfp96            | zinc finger protein 96                         | 2.29  | 0.09 | 1.48  | 0.0026 | 1.18  | 0.1273 | 1.48  | 0.0087 | 1.05  | 0.7438 |
| 104605_at   | 1434329_s_at | Adipor2          | adiponectin receptor 2                         | -1.41 | 0.14 | -1.75 | 0      | -1.3  | 0.0028 | -2.43 | 0      | -3.07 | 0      |
| 104606_at   | 1460218_at   | Cd52             | CD52 antigen                                   | 1.14  | 0.37 | 2.14  | 0.0914 | -1.16 | 0.2806 | 2.58  | 0.1066 | 1.63  | 0.0166 |
| 104607_at   | 1419056_at   | Rtn2             | reticulum 2 (Z-band associated protein)        | -1.21 | 0.38 | -1.5  | 0.3228 | -1.35 | 0.4274 | -1.01 | 0.985  | -1.03 | 0.9474 |
| 104608_at   | 1451996_at   | Bbp              | beta-amyloid binding protein precursor         | 1.23  | 0.64 | 1.04  | 0.6937 | 1.07  | 0.5038 | -1.06 | 0.56   | 1.08  | 0.7281 |
| 104609_at   | 1415765_at   | 1110031M08Rik    | RIKEN cDNA 1110031M08 gene /// similar to      | 1.19  | 0.02 | 1.19  | 0.0141 | -1.12 | 0.0865 | 1.01  | 0.8489 | 1.57  | 0.0046 |
| 104610_at   | 1426381_at   | Pprc1            | peroxisome proliferative activated receptor, 1 | 1.15  | 0.54 | -1.04 | 0.7739 | 1.3   | 0.0168 | 1.05  | 0.5881 | 2.2   | 0.0115 |
| 104612_g_at | 1423962_at   | Wdr26            | WD repeat domain 26                            | 1.2   | 0.43 | 1.2   | 0.0016 | 1.22  | 0.004  | 1.16  | 0.0259 | -1.08 | 0.432  |
| 104614_at   | 1417389_at   | Gpc1             | glypican 1                                     | -1.85 | 0    | -1.25 | 0.0448 | -1.15 | 0.1571 | -1.47 | 0.0029 | -2.36 | 0.0043 |
| 104616_g_at | 1450187_a_at | Galt             | galactose-1-phosphate uridyl transferase       | 1.28  | 0.16 | 1.05  | 0.6242 | 1.08  | 0.4769 | 1.11  | 0.1972 | -1.34 | 0.0675 |
| 104617_at   | 1434906_at   | 0610005C13Rik    | RIKEN cDNA 0610005C13 gene                     | 1.49  | 0.21 | 1.02  | 0.9459 | -1.14 | 0.6216 | 1.49  | 0.0018 | 1.1   | 0.8423 |
| 104618_at   | 1416174_at   | Rbbp9            | retinoblastoma binding protein 9               | 1.52  | 0.01 | 1.07  | 0.4469 | -1.25 | 0.2091 | 1.06  | 0.4255 | -1.22 | 0.2564 |
| 104619_at   | 1417431_a_at | Sphk2            | sphingosine kinase 2                           | 1.5   | 0.15 | -1.16 | 0.1727 | -1.15 | 0.2204 | -1.15 | 0.1686 | -1.02 | 0.9204 |
| 104620_at   | 1423649_at   | 2010300G19Rik    | RIKEN cDNA 2010300G19 gene                     | -1.21 | 0.24 | 1.1   | 0.3893 | 1.28  | 0.0018 | 1.12  | 0.1473 | 1.33  | 0.078  |
| 104621_at   | 1433834_at   | F830029L24Rik    | Membrane-associated ring finger (C3HC4) clu    | -1.09 | 0.46 | -1.07 | 0.2034 | -1.01 | 0.8698 | -1.11 | 0.0868 | -1.17 | 0.1575 |
| 104622_at   | 1418107_at   | Tcea2            | transcription elongation factor A (SII), 2     | 1.55  | 0.43 | -1.02 | 0.9637 | -1.23 | 0.5212 | 1.41  | 0.2936 | -1.02 | 0.9515 |
| 104623_at   | 1419655_at   | Tle3             | transducin-like enhancer of split 3, homolog   | 1.4   | 0.22 | 1.2   | 0.0161 | -1.26 | 0.0461 | 1.19  | 0.0375 | -1.4  | 0.0548 |
| 104624_at   | 1426815_s_at | AU024582         | expressed sequence AU024582                    | -1    | 0.99 | -1.16 | 0.0257 | -1.12 | 0.0422 | -1.1  | 0.128  | -1.03 | 0.8303 |
| 104625_at   | 1434035_at   | Dnajb6           | DnaJ (Hsp40) homolog, subfamily B, member      | 1.03  | 0.79 | -1    | 0.9936 | 1.24  | 0.0855 | 1.36  | 0.0057 | 1.42  | 0.0781 |
| 104626_at   | 1427964_at   | Cklfsf8          | chemokine-like factor super family 8           | 1.44  | 0.05 | 1.02  | 0.8412 | -1.07 | 0.424  | -1.03 | 0.7345 | 1.2   | 0.1295 |
| 104627_at   | 1434256_s_at | Cds2             | CDP-diacylglycerol synthase (phosphatidate     | 1.93  | 0.15 | 1.33  | 0.0382 | -1.13 | 0.4946 | 1.27  | 0.1304 | 1.06  | 0.8786 |
| 104628_at   | 1448647_at   | Man2a1           | mannosidase 2, alpha 1                         | 1.24  | 0.4  | 1.43  | 0      | 1.19  | 0.0138 | 1.58  | 0      | 1.13  | 0.3841 |
| 104629_at   | 1417361_at   | Asb3             | ankyrin repeat and SOCS box-containing pro     | -1.3  | 0.44 | 1     | 0.9925 | 1.06  | 0.4777 | 1.07  | 0.4356 | 1.19  | 0.2637 |
| 104632_at   | 1424651_at   | BC021611         | cDNA sequence BC021611                         | 1.3   | 0.11 | -1.11 | 0.0579 | -1.09 | 0.1634 | -1.1  | 0.1346 | -1.68 | 0.0333 |
| 104633_at   | 1423805_at   | Dab2             | disabled homolog 2 (Drosophila)                | 1.04  | 0.89 | -1.01 | 0.9148 | 1.14  | 0.1815 | -1.07 | 0.5449 | 2.08  | 0.0002 |
| 104634_at   | 1418232_s_at | Lims1            | LIM and senescent cell antigen-like domains    | 1.22  | 0.35 | 1.16  | 0.1078 | 1.02  | 0.8695 | 1.12  | 0.2705 | 1.41  | 0.066  |
| 104635_r_at | 1449094_at   | Gja7             | gap junction membrane channel protein alph     | -1.45 | 0.34 | 1.32  | 0.0442 | 1.4   | 0.0808 | 1.27  | 0.0325 | 1.13  | 0.4074 |
| 104637_at   | 1422072_a_at | Gstm6            | glutathione S-transferase, mu 6                | -1.28 | 0.05 | 1.16  | 0.0353 | -1.03 | 0.6976 | 1.07  | 0.3913 | -1.63 | 0.0355 |
| 104638_at   | 1451372_a_at | Art1             | ADP-ribosyltransferase 1                       | -1.09 | 0.85 | -1.2  | 0.2946 | -1.06 | 0.7393 | -1.04 | 0.7911 | 1.52  | 0.3515 |
| 104640_f_at | 1436558_at   | 4930553M18Rik    | RIKEN cDNA 4930553M18 gene                     | 1.35  | 0.26 | 1.38  | 0.0003 | 1.42  | 0.0106 | 1.39  | 0.0063 | 1.75  | 0.0055 |
| 104641_f_at | 1439113_at   | Hpcal1 /// 2410C | hippocalcin-like 1 /// RIKEN cDNA 2410018L     | -1.12 | 0.38 | -1.11 | 0.5435 | -1.24 | 0.3516 | -1.08 | 0.6192 | 2.01  | 0.3851 |
| 104642_at   | 1449905_at   | Clec4f           | C-type lectin domain family 4, member f        | 1.12  | 0.65 | -1.2  | 0.0557 | -1.12 | 0.1075 | -1.67 | 0.0002 | -1.14 | 0.4939 |
| 104643_at   | 1427261_at   | BC037006         | cDNA sequence BC037006                         | -1.15 | 0.72 | 1.15  | 0.1141 | -1.05 | 0.5041 | -1.09 | 0.2229 | -1.01 | 0.9552 |

|             |              |               |                                                 |       |      |       |        |       |        |       |        |       |        |
|-------------|--------------|---------------|-------------------------------------------------|-------|------|-------|--------|-------|--------|-------|--------|-------|--------|
| 104644_at   | 1450692_at   | Kif4          | kinesin family member 4                         | 1.09  | 0.66 | 1.08  | 0.6307 | -1.12 | 0.6993 | 1.05  | 0.8249 | -1.28 | 0.4671 |
| 104645_at   | 1419354_at   | Klf7          | Kruppel-like factor 7 (ubiquitous)              | 1.15  | 0.83 | -1.1  | 0.6603 | -1.75 | 0.0148 | -1.7  | 0.1016 | 1.33  | 0.2206 |
| 104646_at   | 1418949_at   | Gdf15         | growth differentiation factor 15                | 3.05  | 0.18 | 2.4   | 0.0218 | 1.04  | 0.7017 | 1.97  | 0.0419 | 1.33  | 0.1492 |
| 104647_at   | 1417262_at   | Ptgs2         | prostaglandin-endoperoxide synthase 2           | -1.24 | 0.61 | 2.89  | 0.0463 | 1.29  | 0.5394 | 2.14  | 0.0877 | -1.16 | 0.8082 |
| 104648_at   | 1435762_at   | Pacs1         | phosphofurin acidic cluster sorting protein 1   | -1.02 | 0.96 | 1.4   | 0.0232 | 1.19  | 0.2904 | 1.47  | 0.0044 | 1.18  | 0.4183 |
| 104650_at   | 1422635_at   | Ache          | acetylcholinesterase                            | -1.26 | 0.29 | 1.04  | 0.7756 | 1.01  | 0.9649 | -1.05 | 0.7256 | 1.07  | 0.8116 |
| 104651_at   | 1456039_at   | Snx14         | sorting nexin 14                                | 1.72  | 0.06 | 1.13  | 0.0223 | 1.3   | 0.0417 | 1.2   | 0.0188 | -1.08 | 0.6949 |
| 104652_at   | 1449158_at   | Kcnk2         | potassium channel, subfamily K, member 2        | -1.41 | 0.14 | -1.2  | 0.3545 | -1.17 | 0.2343 | -1.1  | 0.4832 | 1.23  | 0.6215 |
| 104654_at   | 1422564_at   | Actl6b        | actin-like 6B                                   | -1.36 | 0.39 | -1.49 | 0.1663 | -1.44 | 0.2257 | -1.29 | 0.4254 | -1.04 | 0.923  |
| 104655_at   | 1422545_at   | Tbx2          | T-box 2                                         | 1.51  | 0.45 | 1.07  | 0.4351 | 1.15  | 0.3106 | -1.12 | 0.273  | 1.81  | 0.021  |
| 104657_at   | 1450207_at   | Lifr          | leukemia inhibitory factor receptor             | 2.16  | 0.01 | -2.56 | 0.0006 | -1.63 | 0.0132 | -2.33 | 0.0007 | 1.77  | 0.1728 |
| 104659_g_at | 1425107_a_at | Lifr          | leukemia inhibitory factor receptor             | -3.22 | 0    | -5.58 | 0      | -2.11 | 0      | -6.56 | 0      | -3.09 | 0.0077 |
| 104660_at   | 1418751_at   | MGI:1889342   | SHP2 interacting transmembrane adaptor          | -1.21 | 0.64 | -1.38 | 0.325  | -2.13 | 0.0192 | -1.56 | 0.2168 | 1.73  | 0.0979 |
| 104661_at   | 1455134_at   | D730040F13Rik | RIKEN cDNA A630051L19 gene                      | -1.11 | 0.39 | 1.3   | 0.0068 | 1.25  | 0.0209 | 1.25  | 0.1497 | 1.71  | 0.0313 |
| 104662_at   | 1422303_a_at | Tnfrsf18      | tumor necrosis factor receptor superfamily, r   | 1.08  | 0.81 | 2.08  | 0.0017 | 2.06  | 0.0016 | 2.02  | 0.0031 | 2.12  | 0.0339 |
| 104663_at   | 1418144_a_at | Pip5k1b       | phosphatidylinositol-4-phosphate 5-kinase, t    | -1.36 | 0.24 | -1.11 | 0.1539 | -1.15 | 0.0116 | -1.36 | 0.0011 | 1.34  | 0.0279 |
| 104667_at   | 1432083_a_at | Lrpb7         | leucine rich protein, B7 gene                   | -1.25 | 0.1  | -1.07 | 0.7413 | 1.01  | 0.9609 | -1.13 | 0.5536 | 1.05  | 0.8582 |
| 104669_at   | 1417244_a_at | Irf7          | interferon regulatory factor 7                  | -1.44 | 0.05 | -1.12 | 0.6215 | 1.39  | 0.0176 | 1.19  | 0.6063 | -1.13 | 0.7601 |
| 104670_at   | 1434846_at   | 1700065A05Rik | RIKEN cDNA 1700065A05 gene                      | 1.04  | 0.82 | 1.29  | 0.0002 | 1.35  | 0.1712 | 1.19  | 0.055  | -1.06 | 0.767  |
| 104671_at   | 1422573_at   | ---           | ---                                             | 1.19  | 0.59 | 1.76  | 0.0063 | 1.43  | 0.1395 | 1.38  | 0.3062 | 1.63  | 0.2154 |
| 104672_at   | 1416658_at   | Frzb          | frizzled-related protein                        | -1.22 | 0.49 | 1.35  | 0.0058 | 1.25  | 0.0718 | 1.14  | 0.3658 | 1.05  | 0.9016 |
| 104673_at   | 1421928_at   | Epha4         | Eph receptor A4                                 | -2.38 | 0    | -1.26 | 0.1734 | 1.01  | 0.9712 | -1.29 | 0.1502 | 1.91  | 0.0018 |
| 104675_at   | 1425824_a_at | Pcsk4         | proprotein convertase subtilisin/kexin type 4   | 2.01  | 0.25 | 2.02  | 0.0526 | 3.18  | 0      | 3.17  | 0.0021 | 1.01  | 0.9442 |
| 104677_at   | 1452235_at   | Man1b1        | mannosidase, alpha, class 1B, member 1          | 1.16  | 0.34 | -1.02 | 0.8837 | 1.1   | 0.4146 | -1.11 | 0.3251 | 1.11  | 0.3228 |
| 104678_at   | 1417859_at   | Gas7          | growth arrest specific 7                        | -1.07 | 0.87 | -1.14 | 0.4959 | -1.31 | 0.2526 | -1.06 | 0.7536 | 1.71  | 0.0278 |
| 104680_at   | 1417481_at   | Ramp1         | receptor (calcitonin) activity modifying protei | 1.02  | 0.95 | 1.05  | 0.5667 | -1.04 | 0.5621 | -1.03 | 0.504  | -1.01 | 0.9684 |
| 104681_at   | 1421143_at   | Diap1         | diaphanous homolog 1 (Drosophila)               | -1.6  | 0.02 | -1.09 | 0.3852 | -1.04 | 0.7113 | -1.32 | 0.0097 | 1.02  | 0.9337 |
| 104682_at   | 1419518_at   | Tuba8         | tubulin, alpha 8                                | -1.3  | 0.03 | -1.09 | 0.2216 | -1.01 | 0.857  | 1.03  | 0.7205 | 1.26  | 0.0158 |
| 104684_at   | 1437968_at   | Grin1         | glutamate receptor, ionotropic, NMDA1 (zet      | -2.14 | 0.02 | -1.07 | 0.3074 | -1.06 | 0.4435 | -1.17 | 0.0093 | 1.22  | 0.363  |
| 104686_at   | 1450202_at   | Grin1         | glutamate receptor, ionotropic, NMDA1 (zet      | -1.69 | 0.02 | 1.17  | 0.2468 | 1.67  | 0.0014 | 1.38  | 0.0448 | -1.7  | 0.1621 |
| 104687_at   | 1451024_at   | Edg6          | endothelial differentiation, G-protein-couplec  | -2.7  | 0.05 | 1.35  | 0.2569 | -1.04 | 0.901  | -1.02 | 0.943  | -1.64 | 0.2454 |
| 104688_at   | 1439323_a_at | Map4k1        | mitogen activated protein kinase kinase kina    | 1.54  | 0.06 | -1.02 | 0.7362 | -1.04 | 0.7584 | -1.02 | 0.7819 | 1.19  | 0.3472 |
| 104689_at   | 1450464_at   | E4f1          | E4F transcription factor 1                      | 1.77  | 0.32 | 1.98  | 0.0081 | 1.93  | 0.0003 | 1.95  | 0.0017 | -1.08 | 0.8958 |
| 104690_at   | 1417249_at   | Polm          | polymerase (DNA directed), mu                   | -1.69 | 0.01 | -1.11 | 0.0828 | -1.05 | 0.4735 | -1.06 | 0.2794 | 1.14  | 0.0637 |
| 104692_at   | 1420558_at   | Selp          | selectin, platelet                              | 2.4   | 0.26 | 1.07  | 0.4062 | 1.24  | 0.0257 | 1.05  | 0.5663 | 1.23  | 0.2758 |
| 104693_at   | 1429126_at   | 2600001M11Rik | RIKEN cDNA 2600001M11 gene                      | 1.91  | 0.05 | 1.54  | 0.0621 | 1.83  | 0.0141 | 1.6   | 0.0205 | -1.01 | 0.9758 |
| 104694_at   | 1451902_at   | BC021442      | cDNA sequence BC021442                          | -1.07 | 0.58 | 1.24  | 0.1304 | 1.3   | 0.0394 | 1.06  | 0.6767 | 1.43  | 0.2017 |
| 104695_at   | 1453184_at   | 2310040C09Rik | RIKEN cDNA 2310040C09 gene                      | -1.38 | 0.09 | -1.13 | 0.1051 | -1.18 | 0.0884 | -1.27 | 0.0657 | 1.01  | 0.9718 |
| 104696_at   | 1418989_at   | Ctse          | cathepsin E                                     | -2.29 | 0.59 | 1.02  | 0.8761 | 1.63  | 0.0082 | 1.05  | 0.7303 | 1.76  | 0.2326 |
| 104698_at   | 1425463_at   | Gata6         | GATA binding protein 6                          | -1.15 | 0.7  | -1.18 | 0.1113 | -1.31 | 0.0945 | -1.04 | 0.7032 | 1.43  | 0.0551 |
| 104700_at   | 1422198_a_at | Shmt1         | serine hydroxymethyl transferase 1 (soluble)    | -2.27 | 0.01 | -1.58 | 0.2215 | -1.51 | 0.2442 | -1.75 | 0.0552 | -1.04 | 0.9094 |
| 104701_at   | 1418025_at   | Bhlhb2        | basic helix-loop-helix domain containing, cla   | -1.12 | 0.7  | -1.14 | 0.3525 | 1.24  | 0.1718 | -1.07 | 0.6412 | -1.3  | 0.0471 |
| 104704_at   | 1415986_at   | Clcn4-2       | chloride channel 4-2                            | 1.12  | 0.66 | -1.17 | 0.0328 | 1.22  | 0.1642 | -1.15 | 0.1736 | -1.57 | 0.0151 |
| 104706_at   | 1418988_at   | Pex7          | peroxisome biogenesis factor 7                  | 1.7   | 0.03 | 1.11  | 0.0424 | 1.04  | 0.6153 | 1.27  | 0.0017 | -1.05 | 0.7095 |
| 104707_at   | 1424445_at   | Tm4sf5        | transmembrane 4 superfamily member 5            | 1.45  | 0.47 | 1.06  | 0.5794 | 3.03  | 0.241  | 1.06  | 0.4218 | 1.28  | 0.1849 |
| 104708_at   | 1455042_at   | Tbl1x         | Transducin (beta)-like 1 X-linked               | -1.35 | 0.08 | 1.1   | 0.2223 | 1.13  | 0.2808 | 1.14  | 0.3097 | 1.27  | 0.1984 |
| 104709_at   | 1423347_at   | ---           | ---                                             | -1.22 | 0.17 | -1.02 | 0.6962 | 1.09  | 0.2617 | -1.01 | 0.7941 | -1.24 | 0.1818 |
| 104710_at   | 1418991_at   | Bak1          | BCL2-antagonist/killer 1                        | -1.25 | 0.2  | -1.12 | 0.2436 | -1.3  | 0.0077 | -1.1  | 0.1843 | -1.06 | 0.5271 |
| 104711_at   | 1417510_at   | Vps4a         | vacuolar protein sorting 4a (yeast)             | -1.24 | 0.14 | -1.06 | 0.3062 | 1.11  | 0.0191 | -1.01 | 0.8084 | 1.04  | 0.7696 |
| 104712_at   | 1424942_a_at | Myc           | myelocytomatosis oncogene                       | -1.06 | 0.92 | -2.32 | 0.0025 | -1.92 | 0.01   | -2.05 | 0.0102 | -1.17 | 0.7785 |
| 104713_at   | 1433565_at   | 2410002M20Rik | RIKEN cDNA 2410002M20 gene                      | -1.29 | 0.32 | 1.25  | 0.4292 | 1.48  | 0.0985 | -1.01 | 0.9692 | 1.07  | 0.8436 |
| 104714_at   | 1450932_s_at | Dock9         | dedicator of cytokinesis 9                      | 1.75  | 0.01 | -1.03 | 0.8127 | -1.03 | 0.8285 | -1.12 | 0.4108 | -1.13 | 0.3342 |
| 104715_at   | 1424281_at   | Ubap2         | ubiquitin-associated protein 2                  | -1.21 | 0.02 | -1.06 | 0.3136 | -1.03 | 0.5959 | -1.11 | 0.1632 | 1.4   | 0.0347 |

|             |              |               |                                                 |       |      |       |        |       |        |       |        |       |        |
|-------------|--------------|---------------|-------------------------------------------------|-------|------|-------|--------|-------|--------|-------|--------|-------|--------|
| 104716_at   | 1448754_at   | Rbp1          | retinol binding protein 1, cellular             | 1.87  | 0.35 | 1.57  | 0.0349 | 1.56  | 0.002  | 2.29  | 0.0206 | 2.51  | 0.0162 |
| 104717_at   | 1419984_s_at | Zfp644        | zinc finger protein 644                         | 1.59  | 0    | 1.2   | 0.0077 | 1.16  | 0.1667 | 1.15  | 0.0448 | 1.12  | 0.4669 |
| 104719_at   | 1418257_at   | Slc12a7       | solute carrier family 12, member 7              | 1.34  | 0.05 | 1.09  | 0.2423 | -1.08 | 0.4993 | 1.06  | 0.3958 | -1.25 | 0.2121 |
| 104720_at   | 1433780_at   | Ubn1          | ubnuclein 1                                     | -1.08 | 0.48 | 1.02  | 0.7429 | 1.07  | 0.2494 | 1.03  | 0.5188 | -1.03 | 0.8255 |
| 104722_at   | 1451165_at   | D15Erd735e    | DNA segment, Chr 15, ERATO Doi 735, exp         | 1.46  | 0.23 | -1.12 | 0.1323 | -1.41 | 0.0156 | -1.31 | 0.0125 | 1.12  | 0.6519 |
| 104725_at   | 1427918_a_at | Rhoq          | ras homolog gene family, member Q               | 1.24  | 0.51 | 1.44  | 0.0093 | 1.51  | 0.0421 | 1.72  | 0.0018 | 1.21  | 0.4692 |
| 104726_at   | 1451625_a_at | 1700013L23Rik | RIKEN cDNA 1700013L23 gene                      | -1.12 | 0.21 | -1.46 | 0      | -1.22 | 0.0001 | -1.67 | 0      | -2.59 | 0      |
| 104728_at   | 1426246_at   | Pros1         | protein S (alpha)                               | 1.33  | 0.1  | 1.19  | 0.0489 | -1.03 | 0.6911 | 1.2   | 0.0289 | 1.02  | 0.8635 |
| 104729_at   | 1416255_at   | Gja4          | gap junction membrane channel protein alpt      | -1.37 | 0.37 | -1.46 | 0.0356 | -1.12 | 0.6105 | -1.11 | 0.6834 | 1.07  | 0.7009 |
| 104730_at   | 1417675_a_at | Mdn1          | midasin homolog (yeast)                         | -1.49 | 0.65 | 1.2   | 0.3853 | 1.2   | 0.318  | 1.08  | 0.7132 | 1.4   | 0.2857 |
| 104731_at   | 1419564_at   | Zfp467        | zinc finger protein 467                         | 1.06  | 0.84 | 1.28  | 0.0329 | 1.13  | 0.2447 | 1.36  | 0.0021 | 1.32  | 0.0636 |
| 104733_at   | 1418579_at   | Cetn2         | centrin 2                                       | -1.21 | 0.59 | -1.18 | 0.248  | -1.07 | 0.7677 | -1.19 | 0.1411 | 1.02  | 0.9796 |
| 104735_at   | 1434881_s_at | Kctd12        | potassium channel tetramerisation domain c      | 1.33  | 0.31 | 1.61  | 0.0197 | 1.09  | 0.6128 | 1.98  | 0.0032 | 1.52  | 0.0033 |
| 104737_at   | 1435639_at   | 2610528A11Rik | RIKEN cDNA 2610528A11 gene                      | -1.38 | 0.2  | 1.3   | 0.1872 | 1.1   | 0.5449 | 1.03  | 0.829  | 1.94  | 0.234  |
| 104738_at   | 1417657_s_at | Dnajc2        | DnaJ (Hsp40) homolog, subfamily C, memb         | 1.62  | 0.24 | 1.19  | 0.054  | -1.03 | 0.7536 | 1.24  | 0.0223 | -1.01 | 0.9513 |
| 104739_at   | 1424068_at   | Tcta          | T-cell leukemia translocation altered gene      | 1.33  | 0.48 | -1.02 | 0.6299 | -1.07 | 0.3577 | -1.07 | 0.0846 | 1.19  | 0.1253 |
| 104740_at   | 1424427_at   | D1Erd251e     | DNA segment, Chr 1, ERATO Doi 251, expr         | 1.04  | 0.86 | -1.04 | 0.5227 | -1.07 | 0.3478 | -1.07 | 0.3604 | -1.46 | 0.1497 |
| 104741_at   | 1454787_at   | Zdhhc9        | zinc finger, DHHC domain containing 9           | 1.08  | 0.58 | -1.17 | 0.0383 | -1.05 | 0.516  | -1.14 | 0.0863 | 1.1   | 0.2358 |
| 104742_at   | 1452592_at   | Mgst2         | microsomal glutathione S-transferase 2          | -1.02 | 0.95 | 1.27  | 0.2753 | 1.13  | 0.4735 | 2.07  | 0.0006 | 1.7   | 0.0813 |
| 104743_at   | 1423551_at   | Cdh13         | cadherin 13                                     | 1.14  | 0.75 | -1.22 | 0.1413 | -1.03 | 0.8472 | -1.24 | 0.1213 | 1.8   | 0.0633 |
| 104744_at   | 1424293_s_at | 2610319K07Rik | RIKEN cDNA 2610319K07 gene                      | 1.41  | 0.15 | 1.05  | 0.4231 | 1.13  | 0.0932 | 1.12  | 0.008  | -1.09 | 0.6411 |
| 104745_at   | 1416793_at   | Arl6ip2       | ADP-ribosylation factor-like 6 interacting pro  | 1.29  | 0.28 | -1.2  | 0.0366 | 1.05  | 0.5849 | -1.11 | 0.3546 | -1.18 | 0.1432 |
| 104746_at   | 1416803_at   | Fkbp7         | FK506 binding protein 7                         | -1.04 | 0.77 | -1.03 | 0.781  | -1.08 | 0.5585 | -1.12 | 0.2512 | 1.33  | 0.0275 |
| 104747_at   | 1448299_at   | Slc1a1        | solute carrier family 1 (neuronal/epithelial hi | -1.66 | 0.32 | 1.24  | 0.4449 | 1.51  | 0.2273 | 1.18  | 0.1867 | 1.86  | 0.1517 |
| 104749_at   | 1449664_s_at | Rnf20         | ring finger protein 20                          | 1.05  | 0.93 | 1.27  | 0.0972 | 1.3   | 0.2114 | 1.24  | 0.0848 | 1     | 0.9902 |
| 104750_at   | 1417292_at   | Ifi47         | interferon gamma inducible protein 47           | -2.1  | 0.05 | 1.05  | 0.9233 | -2.22 | 0.0013 | 1.11  | 0.8146 | -2.45 | 0.0346 |
| 104751_at   | 1422530_at   | Prph1         | peripherin 1                                    | -2.24 | 0.02 | 1.03  | 0.7573 | -1.06 | 0.5817 | -1.1  | 0.3584 | 1.26  | 0.4098 |
| 104752_at   | 1418254_at   | Apip          | APAF1 interacting protein                       | 1.07  | 0.7  | -1.12 | 0.016  | -1.04 | 0.5969 | -1.03 | 0.6712 | -1.36 | 0.0233 |
| 104754_at   | 1448778_at   | Sfrs4         | splicing factor, arginine/serine-rich 4 (SRp75  | 1.04  | 0.82 | 1.07  | 0.4073 | 1.45  | 0.0001 | 1.41  | 0.038  | 1.42  | 0.0054 |
| 104755_at   | 1427689_a_at | Tnip1         | TNFAIP3 interacting protein 1                   | 1.04  | 0.73 | -1.05 | 0.5037 | -1.22 | 0.0011 | 1.1   | 0.4458 | -1.06 | 0.5058 |
| 104756_at   | 1435431_at   | 2310047M15Rik | RIKEN cDNA 2310047M15 gene                      | -1.18 | 0.23 | -1.02 | 0.8248 | 1.06  | 0.5021 | 1.08  | 0.2675 | 1.21  | 0.1967 |
| 104757_at   | 1424891_a_at | Zw10          | ZW10 homolog (Drosophila), centromere/kir       | 1.41  | 0.09 | -1.03 | 0.8489 | 1.03  | 0.8573 | -1.09 | 0.5251 | -1.04 | 0.8999 |
| 104758_at   | 1452710_at   | Rpusd4        | RNA pseudouridylylase synthase domain cont      | 1.44  | 0.07 | -1.32 | 0.0043 | -1.08 | 0.1794 | -1.14 | 0.3171 | 1.19  | 0.4114 |
| 104759_at   | 1454998_at   | 1200011118Rik | RIKEN cDNA 1200011118 gene                      | 1.2   | 0.59 | -1.12 | 0.09   | 1.02  | 0.8357 | 1.03  | 0.6011 | -1.59 | 0.0846 |
| 104760_at   | 1451016_at   | lfrd2         | interferon-related developmental regulator 2    | 1.23  | 0.06 | 1.18  | 0.017  | 1.09  | 0.2416 | 1.2   | 0.0002 | 1.13  | 0.2585 |
| 104761_at   | 1426708_at   | Antxr2        | anthrax toxin receptor 2                        | 1.7   | 0.07 | 1.19  | 0.0925 | -1.16 | 0.0234 | 1.07  | 0.2963 | -1.79 | 0.088  |
| 104766_at   | 1418305_s_at | Nola1         | nucleolar protein family A, member 1 (H/AC)     | 1.04  | 0.82 | 1     | 0.9964 | 1.01  | 0.9108 | -1.05 | 0.3855 | 1.06  | 0.0786 |
| 160066_at   | 1422730_at   | Limd1         | LIM domains containing 1                        | 1.62  | 0.02 | 1.14  | 0.1243 | 1.18  | 0.0678 | 1.12  | 0.1275 | 1.15  | 0.5021 |
| 160067_at   | 1423705_at   | 2310057D15Rik | RIKEN cDNA 2310057D15 gene                      | 1.25  | 0.61 | 1.34  | 0.1554 | 1.04  | 0.8707 | 1.54  | 0.0091 | 1.6   | 0.1112 |
| 160068_at   | 1417719_at   | Sap30         | sin3 associated polypeptide                     | 1.1   | 0.78 | 1.34  | 0.0519 | 1.36  | 0.0059 | 1.21  | 0.3136 | 1.28  | 0.3584 |
| 160069_at   | 1417506_at   | Gmnn          | geminin                                         | 3.31  | 0    | 1.58  | 0.0053 | 1.64  | 0.0011 | 1.8   | 0.0001 | -1.42 | 0.1057 |
| 160070_at   | 1448186_at   | Pnlipr2       | pancreatic lipase-related protein 2             | -1.73 | 0.21 | 1.41  | 0.042  | 1.11  | 0.6499 | -1.15 | 0.6236 | -1.1  | 0.8404 |
| 160071_at   | 1423373_at   | Rpp30         | ribonuclease P/MRP 30 subunit (human)           | 1.58  | 0    | 1.3   | 0.0118 | 1.32  | 0.0304 | 1.18  | 0.1173 | 1.3   | 0.0783 |
| 160074_at   | 1426215_at   | ---           | ---                                             | 1.11  | 0.83 | -1.32 | 0.0073 | -2.4  | 0      | -2.1  | 0      | -3.36 | 0.0021 |
| 160075_at   | 1417468_at   | Nit1          | nitrilase 1                                     | 1.31  | 0.11 | 1.23  | 0.0174 | 1.03  | 0.726  | 1.22  | 0.014  | 1.38  | 0.059  |
| 160076_at   | 1430500_s_at | Mtx2          | metaxin 2                                       | 1.17  | 0.61 | 1.12  | 0.0345 | 1.31  | 0.0506 | 1.23  | 0.0184 | -1.19 | 0.2429 |
| 160077_at   | 1431411_a_at | Rai12         | retinoic acid induced 12                        | -3.7  | 0.4  | 1.36  | 0.0329 | 1.2   | 0.1814 | 1.3   | 0.3    | 2.61  | 0.0001 |
| 160078_at   | 1450914_at   | Ppp1r14b      | protein phosphatase 1, regulatory (inhibitor)   | 1.74  | 0.17 | -1    | 0.9769 | 1.09  | 0.4098 | 1.03  | 0.6366 | 1.08  | 0.3886 |
| 160079_i_at | 1451495_at   | Wac           | WW domain containing adaptor with coiled-c      | 1.02  | 0.95 | 1.08  | 0.5633 | 1.19  | 0.1822 | 1     | 0.9785 | 1.07  | 0.6619 |
| 160081_at   | 1416807_at   | Rpl36a        | ribosomal protein L36a                          | 1.07  | 0.51 | 1.13  | 0.1965 | 1.19  | 0.06   | 1.26  | 0.0011 | 1.27  | 0.103  |
| 160082_s_at | 1423052_at   | Arf4          | ADP-ribosylation factor 4                       | -1.51 | 0.24 | -1.02 | 0.8124 | -1.06 | 0.5297 | -1.08 | 0.3163 | -1.22 | 0.1341 |
| 160084_at   | 1438761_a_at | Odc1          | ornithine decarboxylase, structural 1           | -1.24 | 0.18 | -1.28 | 0.0002 | -1.1  | 0.1842 | -1.35 | 0.0002 | 1.12  | 0.424  |
| 160085_at   | 1448609_at   | Tst           | thiosulfate sulfurtransferase, mitochondrial    | -1.24 | 0.33 | -1.34 | 0.0002 | -1.2  | 0.0427 | -1.45 | 0.0001 | -1.19 | 0.4384 |



|             |              |               |                                                  |       |      |       |        |       |        |       |        |       |        |
|-------------|--------------|---------------|--------------------------------------------------|-------|------|-------|--------|-------|--------|-------|--------|-------|--------|
| 160088_at   | 1450332_s_at | Fmo5          | flavin containing monooxygenase 5                | 1.33  | 0.26 | 1.3   | 0.0003 | 1.32  | 0.0551 | 1.75  | 0      | -1.09 | 0.4017 |
| 160089_at   | 1415880_a_at | Lamp1         | lysosomal membrane glycoprotein 1                | -1.12 | 0.37 | 1.01  | 0.8709 | 1.05  | 0.3799 | -1.01 | 0.9136 | -1.29 | 0.0292 |
| 160090_f_at | 1434799_x_at | Aldoa         | aldolase 1, A isoform                            | 1.45  | 0.01 | 1.19  | 0.3969 | 1.12  | 0.5108 | 1.5   | 0.0546 | 1.34  | 0.0976 |
| 160091_at   | 1426554_a_at | Pgam1         | phosphoglycerate mutase 1                        | 1.06  | 0.75 | 1.22  | 0.0042 | 1.18  | 0.0457 | 1.19  | 0.0018 | -1.19 | 0.0841 |
| 160092_at   | 1416067_at   | Ildr1         | interferon-related developmental regulator 1     | 1.7   | 0    | 1.06  | 0.6898 | 1.28  | 0.1172 | 1.17  | 0.1474 | 1.48  | 0.4267 |
| 160094_at   | 1423589_at   | Arpc4         | actin related protein 2/3 complex, subunit 4     | -1.06 | 0.87 | 1.05  | 0.39   | -1.01 | 0.8859 | 1.07  | 0.5186 | 1.29  | 0.5247 |
| 160095_at   | 1416121_at   | Lox           | lysyl oxidase                                    | 1.27  | 0.29 | 1.65  | 0.399  | -1.55 | 0.1529 | -1.28 | 0.5449 | 3.01  | 0.1074 |
| 160096_at   | 1416524_at   | Spop          | speckle-type POZ protein                         | -1.11 | 0.62 | -1.21 | 0.0029 | 1.03  | 0.537  | -1.23 | 0.0008 | -1.17 | 0.045  |
| 160097_at   | 1427788_at   | Nespas        | neuroendocrine secretory protein antisense       | 1.11  | 0.65 | -1.15 | 0.5636 | 1.27  | 0.246  | 1.16  | 0.5338 | 2.27  | 0.1251 |
| 160098_s_at | 1434370_s_at | Faf1          | Fas-associated factor 1                          | -1.27 | 0.53 | -1.08 | 0.3105 | 1.08  | 0.2013 | -1.15 | 0.1406 | -1.03 | 0.6878 |
| 160099_at   | 1451336_at   | Lgals4        | lectin, galactose binding, soluble 4             | 1.59  | 0.01 | -1.01 | 0.9121 | 1.53  | 0.0938 | 1.14  | 0.1561 | 1.32  | 0.1309 |
| 160101_at   | 1448239_at   | Hmox1         | heme oxygenase (decycling) 1                     | -1.46 | 0.06 | 1.19  | 0.3173 | -1.27 | 0.0293 | 1.3   | 0.4118 | 1.05  | 0.7842 |
| 160102_at   | 1415785_a_at | Cct8          | chaperonin subunit 8 (theta)                     | 2.23  | 0.13 | 1.05  | 0.471  | 1.17  | 0.022  | 1.21  | 0.0292 | -1.16 | 0.2105 |
| 160103_at   | 1420609_at   |               | 7-Mar membrane-associated ring finger (C3HC4) 7  | 1.21  | 0.01 | 1.32  | 0.011  | 1.04  | 0.7369 | 1.23  | 0.031  | 1.14  | 0.4839 |
| 160104_at   | 1416968_a_at | Hsd3b7        | hydroxy-delta-5-steroid dehydrogenase, 3 beta    | -1.31 | 0.02 | -1.16 | 0.0636 | -1.15 | 0.1884 | -1.31 | 0.0045 | -1.91 | 0.0055 |
| 160106_at   | 1450355_a_at | Capg          | capping protein (actin filament), gelsolin-like  | 1.74  | 0.07 | 1.57  | 0.2351 | -1.74 | 0.04   | 2.19  | 0.1853 | 1.2   | 0.2031 |
| 160107_at   | 1448736_a_at | Hprt1         | hypoxanthine guanine phosphoribosyl transf       | 1.39  | 0.24 | 1.38  | 0.0003 | 1.22  | 0.0088 | 1.6   | 0      | -1.44 | 0.0013 |
| 160108_at   | 1419666_x_at | Nupr1         | nuclear protein 1                                | -1.52 | 0.39 | -1.06 | 0.8548 | -1.15 | 0.652  | 1.17  | 0.66   | 3.84  | 0.0557 |
| 160109_at   | 1419156_at   | Sox4          | SRY-box containing gene 4                        | -1.21 | 0.68 | -1.01 | 0.946  | -1.12 | 0.3574 | -1.33 | 0.0778 | -1.15 | 0.608  |
| 160110_at   | 1448145_at   | Wwp2          | WW domain containing E3 ubiquitin protein li     | 1.08  | 0.59 | -1.19 | 0.0063 | -1.06 | 0.4234 | -1.1  | 0.1784 | 1.12  | 0.2323 |
| 160111_at   | 1449576_at   | Eif1ay        | eukaryotic translation initiation factor 1A, Y-I | -1.01 | 0.96 | -1.07 | 0.4529 | 1.18  | 0.0571 | -1.08 | 0.5076 | -1.5  | 0.0384 |
| 160113_at   | 1416738_at   | Brap          | BRCA1 associated protein                         | -1.11 | 0.14 | 1.1   | 0.2107 | -1.01 | 0.956  | 1.13  | 0.1529 | 1.34  | 0.0268 |
| 160114_at   | 1420815_at   | Gdi3          | guanosine diphosphate (GDP) dissociation i       | -1.1  | 0.56 | 1.03  | 0.6884 | 1.08  | 0.3881 | 1.06  | 0.2137 | -1.15 | 0.1672 |
| 160115_at   | 1455866_x_at | Txnl1         | thioredoxin-like 1                               | 1.08  | 0.7  | 1     | 0.9708 | -1.02 | 0.8033 | 1.07  | 0.3057 | -1.11 | 0.5224 |
| 160116_at   | 1454677_at   | Timp2         | tissue inhibitor of metalloproteinase 2          | 2.04  | 0.33 | 1.48  | 0.2601 | 1.81  | 0.1724 | 1.71  | 0.0986 | 1.11  | 0.8062 |
| 160117_at   | 1424175_at   | Tef           | thyrotroph embryonic factor                      | 1.15  | 0.68 | 1.34  | 0.0383 | 1.23  | 0.0417 | 1.65  | 0.0002 | 1.86  | 0.0161 |
| 160118_at   | 1448383_at   | ---           | ---                                              | -1.75 | 0.09 | 1.05  | 0.6651 | -1.19 | 0.1391 | -1.11 | 0.308  | 1.58  | 0.0868 |
| 160119_at   | 1452754_at   | 5730592L21Rik | RIKEN cDNA 5730592L21 gene                       | -1.52 | 0.41 | -2.02 | 0.001  | -1.6  | 0.0041 | -2.1  | 0.0003 | -1.32 | 0.1616 |
| 160120_i_at | 1416626_at   | Pla2g1b       | phospholipase A2, group IB, pancreas             | -3.69 | 0.08 | -1.08 | 0.4164 | -1.05 | 0.5573 | -1.23 | 0.0287 | 1.3   | 0.0649 |
| 160121_at   | 1455798_at   | Galk2         | galactokinase 2                                  | 1.21  | 0.11 | -1.03 | 0.6711 | -1.09 | 0.301  | -1.2  | 0.0326 | 1.04  | 0.7744 |
| 160123_at   | 1427903_at   | Phpt1         | phosphohistidine phosphatase 1                   | 1.4   | 0.22 | -1.03 | 0.5311 | -1.09 | 0.0823 | 1.06  | 0.3083 | -1.21 | 0.1967 |
| 160124_r_at | 1419545_a_at | Atp6v1c1      | ATPase, H+ transporting, V1 subunit C, isofo     | 1.5   | 0.15 | 1.04  | 0.4573 | 1.09  | 0.349  | 1.19  | 0.0157 | 1.13  | 0.4518 |
| 160125_at   | 1452200_at   | D11Ert497e    | DNA segment, Chr 11, ERATO Doi 497, exp          | 1.3   | 0.23 | 1.02  | 0.7622 | 1.09  | 0.2304 | 1.07  | 0.3413 | -1.02 | 0.8553 |
| 160126_at   | 1416272_at   | Map2k1ip1     | mitogen-activated protein kinase kinase 1 in     | 2.05  | 0    | -1.08 | 0.398  | 1.26  | 0.1756 | 1.08  | 0.5439 | -1.25 | 0.553  |
| 160127_at   | 1420827_a_at | ---           | ---                                              | 1.67  | 0.28 | -1.05 | 0.6267 | -1.07 | 0.6502 | 1.01  | 0.931  | -1.14 | 0.224  |
| 160129_at   | 1449506_a_at | Eef1d         | eukaryotic translation elongation factor 1 del   | 1.21  | 0.18 | -1.03 | 0.7158 | -1.04 | 0.6661 | -1.05 | 0.4982 | 1.25  | 0.0456 |
| 160130_at   | 1451188_at   | Wdr26         | WD repeat domain 26                              | 1.83  | 0.33 | 1.12  | 0.4468 | -1.41 | 0.113  | -1.19 | 0.3212 | 1.12  | 0.4562 |
| 160131_at   | 1452387_a_at | Amotl2        | angiominin like 2                                | 1     | 0.99 | 1.16  | 0.162  | -1.04 | 0.6272 | 1.24  | 0.0162 | 1.15  | 0.2877 |
| 160134_at   | 1451311_a_at | Adipor1       | adiponectin receptor 1                           | -1.26 | 0.08 | 1     | 0.9991 | 1.13  | 0.3661 | 1     | 0.9687 | 1.58  | 0.1413 |
| 160135_at   | 1418763_at   | Nit2          | nitrilase family, member 2                       | -1.08 | 0.81 | -1.36 | 0.0003 | -1.13 | 0.1897 | -1.65 | 0      | -2.32 | 0.0002 |
| 160136_r_at | 1433704_s_at | Tloc1         | translocation protein 1                          | 1.18  | 0.41 | -1.06 | 0.6421 | 1.07  | 0.4965 | 1.04  | 0.7234 | 1.02  | 0.9375 |
| 160137_at   | 1450026_a_at | B3gnt1        | UDP-GlcNAc:betaGal beta-1,3-N-acetylgluc         | 1.48  | 0.37 | 1.42  | 0.102  | 1.4   | 0.0585 | 1.55  | 0.1181 | 1.17  | 0.6043 |
| 160138_at   | 1450376_at   | Mxi1          | Max interacting protein 1                        | 1.03  | 0.91 | 1.32  | 0.0298 | 1.24  | 0.0091 | 1.42  | 0.0107 | 1.25  | 0.2477 |
| 160139_at   | 1417013_at   | Hspb8         | heat shock 27kDa protein 8                       | 1.3   | 0.28 | 1.12  | 0.1634 | -1.24 | 0.0591 | -1.01 | 0.9136 | -1.15 | 0.1221 |
| 160140_at   | 1428282_at   | Tbce          | tubulin-specific chaperone e                     | 1.6   | 0.25 | 1.09  | 0.4215 | 1.22  | 0.2019 | 1.43  | 0.0001 | -1.11 | 0.6502 |
| 160142_at   | 1417593_at   | Tusc2         | tumor suppressor candidate 2                     | -1.21 | 0.23 | -1.08 | 0.4675 | -1.1  | 0.2061 | -1.15 | 0.1298 | -1.18 | 0.3617 |
| 160144_at   | 1426905_a_at | ---           | ---                                              | -1.48 | 0.13 | 1.21  | 0.017  | 1.24  | 0.0028 | 1.37  | 0.0035 | 1.29  | 0.0002 |
| 160145_at   | 1428359_s_at | 1810010M01Rik | RIKEN cDNA 1810010M01 gene                       | 1.19  | 0.81 | 1.75  | 0.1394 | 2.59  | 0.359  | 1.62  | 0.3364 | 1.66  | 0.2915 |
| 160150_f_at | 1456380_x_at | Cnn3          | calponin 3, acidic                               | 1.33  | 0.13 | 1.45  | 0.0003 | 1.32  | 0.0139 | 1.46  | 0.0001 | 1.62  | 0.0345 |
| 160151_i_at | 1424462_at   | 1200009B18Rik | RIKEN cDNA 1200009B18 gene                       | -1.15 | 0.46 | -1    | 0.9813 | 1.22  | 0.1209 | 1.18  | 0.0607 | 1.11  | 0.615  |
| 160152_at   | 1416005_at   | Psmc1         | protease (prosome, macropain) 26S subunit        | 2.22  | 0.06 | 1.11  | 0.2406 | -1.03 | 0.6869 | 1.19  | 0.0144 | -1.21 | 0.0956 |
| 160153_at   | 1448362_at   | Dnajc7        | DnaJ (Hsp40) homolog, subfamily C, memb          | 1.78  | 0.1  | 1.01  | 0.9256 | 1.06  | 0.4466 | 1.08  | 0.2402 | 1.07  | 0.6123 |
| 160155_at   | 1433483_s_at | C86187        | expressed sequence C86187                        | -1.35 | 0.23 | 1.02  | 0.8602 | -1.17 | 0.2624 | -1.04 | 0.7975 | -1.61 | 0.3423 |

|             |              |                  |                                                 |       |      |       |        |       |        |       |        |       |        |
|-------------|--------------|------------------|-------------------------------------------------|-------|------|-------|--------|-------|--------|-------|--------|-------|--------|
| 160156_at   | 1423829_at   | 0910001A06Rik    | RIKEN cDNA 0910001A06 gene                      | 1.2   | 0.41 | 1.62  | 0.07   | 1.2   | 0.257  | 1.76  | 0.0862 | 1.71  | 0.0966 |
| 160158_at   | 1450990_at   | Gpc3             | glypican 3                                      | 1.42  | 0.11 | 1.1   | 0.2504 | -1.08 | 0.3945 | 1.08  | 0.4881 | 1.16  | 0.0297 |
| 160159_at   | 1448205_at   | Ccnb1-rs1 /// Cc | cyclin B1, related sequence 1 /// cyclin B1     | -1.06 | 0.92 | 1.4   | 0.2214 | -1.58 | 0.2473 | 1.54  | 0.2296 | -2.08 | 0.2934 |
| 160160_at   | 1434994_at   | Dedd             | death effector domain-containing                | -1.54 | 0.62 | -1.53 | 0.1072 | 1.18  | 0.4641 | -1.34 | 0.2465 | -1.6  | 0.2507 |
| 160161_at   | 1451981_at   | Gtrgeo22         | gene trap ROSA b-geo 22                         | 1.26  | 0.69 | -1.15 | 0.2027 | -1.17 | 0.1903 | -1.22 | 0.1018 | -1.15 | 0.5794 |
| 160162_at   | 1426529_a_at | Tagln2           | transgelin 2                                    | 1.27  | 0.23 | 1.12  | 0.1819 | -1.06 | 0.1335 | 1.16  | 0.1577 | 1.17  | 0.0382 |
| 160164_at   | 1415755_a_at | Ube2v1           | ubiquitin-conjugating enzyme E2 variant 1       | 1.24  | 0.09 | -1.03 | 0.6216 | -1.01 | 0.8949 | 1.05  | 0.344  | -1.16 | 0.2732 |
| 160165_at   | 1424345_s_at | Ube2m            | ubiquitin-conjugating enzyme E2M (UBC12)        | 1.42  | 0.4  | 1.01  | 0.8523 | 1.06  | 0.4898 | 1.02  | 0.6909 | -1.04 | 0.8095 |
| 160166_r_at | 1460391_at   | 2810409H07Rik    | RIKEN cDNA 2810409H07 gene                      | 1.02  | 0.95 | -1.06 | 0.6119 | 1.19  | 0.1876 | -1.02 | 0.8398 | -1.37 | 0.0712 |
| 160167_at   | 1438917_x_at | Nup62            | nucleoporin 62                                  | -1.28 | 0.06 | -1.07 | 0.3714 | -1.08 | 0.4071 | 1.01  | 0.8987 | 1.14  | 0.3937 |
| 160169_at   | 1429707_at   | Plaa             | phospholipase A2, activating protein            | 1.68  | 0.24 | 1.14  | 0.0552 | 1.16  | 0.1954 | 1.31  | 0.0028 | -1.17 | 0.5176 |
| 160170_at   | 1460181_at   | Stmn3            | stathmin-like 3                                 | -1.55 | 0.55 | -1.04 | 0.7891 | -1.1  | 0.3859 | -1.09 | 0.4529 | -1.1  | 0.849  |
| 160171_f_at | 1418073_at   | MGI:1928939      | acyl-Coenzyme A thioesterase 2, mitochond       | 1.29  | 0.13 | 1.13  | 0.7306 | 1.05  | 0.8637 | 1.26  | 0.5196 | -1.16 | 0.704  |
| 160172_at   | 1426758_s_at | Gtl2             | GTL2, imprinted maternally expressed untra      | 1.33  | 0.05 | 1.05  | 0.5602 | -1.11 | 0.1848 | 3.39  | 0.2936 | 1.21  | 0.3762 |
| 160173_at   | 1436713_s_at | ---              | ---                                             | 1.21  | 0.38 | 1.12  | 0.6018 | -1    | 0.9843 | 2.07  | 0.1602 | -1.02 | 0.96   |
| 160174_at   | 1448278_at   | Xab2             | XPA binding protein 2                           | 1.06  | 0.52 | -1.23 | 0.0091 | -1.16 | 0.0557 | -1.26 | 0.002  | -1.1  | 0.4672 |
| 160176_at   | 1418229_s_at | Hirip5           | histone cell cycle regulation defective intera  | 1.68  | 0.03 | 1.16  | 0.2301 | -1.08 | 0.5367 | 1.25  | 0.0947 | 1.3   | 0.1307 |
| 160177_at   | 1422442_at   | Smu1             | smu-1 suppressor of mec-8 and unc-52 hor        | 1.52  | 0.05 | -1.15 | 0.0213 | 1.01  | 0.8198 | -1.01 | 0.8917 | -1.17 | 0.0333 |
| 160179_at   | 1448340_at   | D9Wsu20e         | DNA segment, Chr 9, Wayne State Universi        | -1.83 | 0.03 | -1.68 | 0      | 1.08  | 0.6008 | -1.95 | 0      | -1.4  | 0.1119 |
| 160180_at   | 1428935_at   | Canx             | calnexin                                        | -1.59 | 0.08 | -1.16 | 0.1081 | -1.03 | 0.723  | -1.15 | 0.1124 | -1.07 | 0.7685 |
| 160181_at   | 1448280_at   | Syp              | synaptophysin                                   | 1.08  | 0.91 | 1.76  | 0.0093 | 1.41  | 0.2041 | 1.55  | 0.0935 | -1.14 | 0.6002 |
| 160182_at   | 1448454_at   | Sfrs6            | splicing factor, arginine/serine-rich 6         | -2.47 | 0.07 | -1.14 | 0.1795 | 1     | 0.9996 | -1.1  | 0.1924 | 1.71  | 0.0103 |
| 160184_at   | 1423334_at   | 1200007D18Rik    | RIKEN cDNA 1200007D18 gene                      | 1.04  | 0.88 | -1.18 | 0.0894 | -1.57 | 0.0008 | -1.72 | 0      | -1.42 | 0.0761 |
| 160185_at   | 1450683_at   | Tagln3           | transgelin 3                                    | 1.24  | 0.57 | 1.5   | 0.0504 | 1.46  | 0.0673 | 1.45  | 0.1177 | 2.77  | 0.0207 |
| 160186_at   | 1454236_a_at | C030004A17Rik    | RIKEN cDNA C030004A17 gene                      | -1.53 | 0.22 | -1.16 | 0.1001 | 1.04  | 0.8177 | -1.01 | 0.9133 | 2.09  | 0.0058 |
| 160187_at   | 1450755_at   | Pafah1b2         | platelet-activating factor acetylhydrolase, isc | 2.72  | 0.06 | -1.09 | 0.3787 | 1.08  | 0.4861 | -1.02 | 0.8736 | -2.51 | 0.0087 |
| 160188_at   | 1418505_at   | Nudt4            | nudix (nucleoside diphosphate linked moiety     | 1.37  | 0.04 | 1.18  | 0.0247 | 1.18  | 0.1331 | 1.31  | 0.0032 | 1.2   | 0.1609 |
| 160190_at   | 1415844_at   | Syt4             | synaptotagmin 4                                 | 1.73  | 0.44 | -1.08 | 0.8685 | -1.33 | 0.5013 | 1.18  | 0.6792 | -3.41 | 0.2269 |
| 160191_at   | 1452120_at   | 4931433E08Rik    | RIKEN cDNA 4931433E08 gene                      | -1.6  | 0.27 | 1.35  | 0.2678 | 1.01  | 0.9718 | 1.56  | 0.0749 | 1.32  | 0.4262 |
| 160192_at   | 1416177_at   | Rbmxrt           | RNA binding motif protein, X chromosome re      | 1.3   | 0.25 | 1.09  | 0.3266 | 1.15  | 0.1574 | 1.25  | 0.0394 | -1.34 | 0.2291 |
| 160193_at   | 1424235_at   | Ormdl2           | ORM1-like 2 (S. cerevisiae)                     | -1.07 | 0.69 | -1.07 | 0.2363 | -1.02 | 0.7555 | -1.11 | 0.017  | -1.41 | 0.0028 |
| 160194_at   | 1448717_at   | Gcdh             | glutaryl-Coenzyme A dehydrogenase               | 1.54  | 0.07 | -1.04 | 0.4974 | -1.13 | 0.0475 | -1.01 | 0.8242 | -1.16 | 0.2335 |
| 160195_at   | 1415721_a_at | 1200013P24Rik    | RIKEN cDNA 1200013P24 gene                      | -1.03 | 0.86 | -1.06 | 0.4264 | 1.06  | 0.2957 | -1.06 | 0.384  | -1.12 | 0.2609 |
| 160196_at   | 1423956_at   | Smap1            | stromal membrane-associated protein 1           | 1.15  | 0.49 | 1.15  | 0.2474 | 1.26  | 0.2457 | 1.16  | 0.1586 | -1.39 | 0.0342 |
| 160197_at   | 1416400_at   | Pycl1            | pyrroline-5-carboxylate reductase-like          | 2.02  | 0.07 | -1.01 | 0.9506 | -1.07 | 0.5822 | -1.21 | 0.2076 | 1.29  | 0.1484 |
| 160198_at   | 1433442_at   | Klhl9            | Kelch-like 9 (Drosophila)                       | -1.1  | 0.8  | 1.23  | 0.0043 | -1    | 0.9923 | 1.19  | 0.0143 | 1.12  | 0.2378 |
| 160199_at   | 1418693_at   | Hnrpc            | heterogeneous nuclear ribonucleoprotein C       | 1.47  | 0.12 | 1.1   | 0.3816 | -1.18 | 0.3398 | -1.11 | 0.2534 | -1.59 | 0.0729 |
| 160200_at   | 1416856_at   | 3230401D17Rik    | RIKEN cDNA 3230401D17 gene                      | 1.34  | 0.26 | 1.38  | 0.0035 | 1.51  | 0.0125 | 1.33  | 0.0018 | 1.24  | 0.2459 |
| 160201_r_at | 1423621_a_at | Slc33a1          | solute carrier family 33 (acetyl-CoA transpor   | -1.67 | 0.06 | 1     | 0.9926 | 1.03  | 0.8494 | -1.04 | 0.7875 | -2.05 | 0.0241 |
| 160202_at   | 1423662_at   | Atp6ap2          | ATPase, H+ transporting, lysosomal access       | 1.43  | 0.26 | 1.15  | 0.1143 | 1.19  | 0.0658 | 1.16  | 0.0499 | 1.09  | 0.4746 |
| 160203_at   | 1426473_at   | Dnajc9           | DnaJ (Hsp40) homolog, subfamily C, memb         | 1.28  | 0.22 | 1.22  | 0.0017 | -1.03 | 0.6607 | 1.31  | 0.0158 | -1.16 | 0.4203 |
| 160204_at   | 1428706_at   | Prr6             | proline-rich polypeptide 6                      | 1.35  | 0.2  | -1.03 | 0.6691 | -1.01 | 0.8416 | -1.06 | 0.4814 | -1.02 | 0.8894 |
| 160205_f_at | 1426405_at   | Rnf11            | ring finger protein 11                          | -1.96 | 0    | 1.26  | 0.0083 | 1.12  | 0.338  | 1.21  | 0.0155 | -1.22 | 0.1524 |
| 160207_at   | 1451666_at   | Acly             | ATP citrate lyase                               | -1.65 | 0.1  | -1.87 | 0.0016 | -1.42 | 0.0481 | -2.13 | 0.0005 | -1.89 | 0.0166 |
| 160208_at   | 1415985_at   | Sf3b3            | splicing factor 3b, subunit 3                   | -1.01 | 0.96 | -1.11 | 0.245  | 1.04  | 0.5072 | 1.01  | 0.8858 | 1     | 0.9792 |
| 160209_at   | 1423532_at   | Rnf44            | ring finger protein 44                          | 1.26  | 0.06 | 1.38  | 0.0003 | 1.25  | 0.0561 | 1.45  | 0.0001 | 1.19  | 0.0355 |
| 160211_at   | 1451284_at   | D17Wsu94e        | DNA segment, Chr 17, Wayne State Univers        | -1.53 | 0.09 | -1.28 | 0.0109 | -1.04 | 0.7134 | -1.19 | 0.0222 | -1.07 | 0.4404 |
| 160213_at   | 1415905_at   | Reg1             | regenerating islet-derived 1                    | 2.18  | 0.12 | 1.32  | 0.0522 | 3.02  | 0.3372 | 1.23  | 0.2623 | 1.57  | 0.0681 |
| 160214_at   | 1450028_a_at | Lancl2           | LanC (bacterial lantibiotic synthetase compc    | 1.55  | 0.13 | 1.43  | 0.0597 | 1.44  | 0.1175 | 1.32  | 0.1073 | 1.1   | 0.7649 |
| 160215_at   | 1420619_a_at | Aes              | amino-terminal enhancer of split                | -1.27 | 0.02 | -1.28 | 0.0092 | -1.34 | 0.0308 | -1.41 | 0.0024 | -1.48 | 0.0176 |
| 160216_f_at | 1456017_x_at | Obox1            | oocyte specific homeobox 1                      | 1.22  | 0.32 | -1.2  | 0.0929 | 1.01  | 0.9497 | 1.08  | 0.7395 | 1.03  | 0.9014 |
| 160217_at   | 1452159_at   | 2310001A20Rik    | RIKEN cDNA 2310001A20 gene                      | 1.34  | 0.4  | -1.02 | 0.8484 | 1.16  | 0.0747 | 1.08  | 0.4146 | -1.43 | 0.4011 |
| 160218_at   | 1451385_at   | 2310056P07Rik    | RIKEN cDNA 2310056P07 gene                      | 1.79  | 0.1  | 1.16  | 0.0582 | 1.23  | 0.107  | 1.38  | 0.0003 | -1.13 | 0.3349 |

|             |              |                 |                                                |       |      |       |        |       |        |       |        |       |        |
|-------------|--------------|-----------------|------------------------------------------------|-------|------|-------|--------|-------|--------|-------|--------|-------|--------|
| 160220_at   | 1450998_at   | Zfp110          | zinc finger protein 110                        | 1.19  | 0.55 | -1    | 0.9624 | 1.22  | 0.2874 | 1.05  | 0.6078 | -1.07 | 0.7718 |
| 160221_at   | 1417079_s_at | Lgals2          | lectin, galactose-binding, soluble 2           | 1.01  | 0.98 | -1.09 | 0.3912 | -1    | 0.9845 | -1.08 | 0.3948 | 1.23  | 0.4199 |
| 160223_at   | 1452665_at   | 2610511O17Rik   | RIKEN cDNA 2610511O17 gene                     | 3.73  | 0.16 | 1.39  | 0.3175 | 1.37  | 0.3283 | 1.3   | 0.4014 | 1.4   | 0.4228 |
| 160225_at   | 1451135_at   | Gtf2b           | general transcription factor IIB               | 1.18  | 0.53 | 1.36  | 0.0085 | 1.72  | 0.0076 | 1.67  | 0.0137 | 1.21  | 0.2052 |
| 160226_at   | 1416570_s_at | Gfm1            | G elongation factor 1                          | 1.47  | 0.17 | 1.04  | 0.6464 | 1.23  | 0.012  | 1.18  | 0.0092 | -1.38 | 0.0072 |
| 160228_at   | 1429555_at   | 1110019C08Rik   | RIKEN cDNA 1110019C08 gene                     | -1.09 | 0.69 | 1.2   | 0.0273 | -1.06 | 0.5041 | 1.16  | 0.185  | 1.54  | 0.1016 |
| 160229_at   | 1420044_at   | ---             | ---                                            | 1.79  | 0.16 | -1.34 | 0.177  | 1.01  | 0.9279 | -1.21 | 0.3036 | -1.04 | 0.9275 |
| 160230_at   | 1434435_s_at | Cox17           | cytochrome c oxidase, subunit XVII assembl     | 1.53  | 0.12 | 1.08  | 0.1763 | 1.02  | 0.7875 | 1.08  | 0.0081 | 1.03  | 0.5822 |
| 160231_at   | 1424907_a_at | Farsla          | phenylalanine-tRNA synthetase-like, alpha s    | -1.07 | 0.92 | 1.17  | 0.3486 | 1.26  | 0.2451 | 1.58  | 0.0051 | 1.85  | 0.1181 |
| 160232_at   | 1418074_at   | St6galnac4      | ST6 (alpha-N-acetyl-neuraminy-2,3-beta-ga      | -2.41 | 0.42 | 1.31  | 0.1828 | 1.03  | 0.8964 | 1.07  | 0.7776 | 2.32  | 0.0962 |
| 160233_at   | 1423717_at   | Ak3             | adenylate kinase 3                             | -1.1  | 0.78 | 1.05  | 0.5638 | 1.06  | 0.661  | 1.04  | 0.7707 | -1.12 | 0.5866 |
| 160234_at   | 1451080_at   | Usp1            | ubiquitin specific protease 1                  | 1.4   | 0.14 | 1.21  | 0.1723 | 1.4   | 0.1403 | 1.48  | 0.0008 | -1.23 | 0.3887 |
| 160235_at   | 1428465_at   | 5033425B17Rik   | RIKEN cDNA 5033425B17 gene                     | 1.39  | 0.13 | -1.25 | 0.0001 | -1.1  | 0.096  | -1.33 | 0.0001 | -2.89 | 0      |
| 160236_at   | 1424824_at   | 9630044O09Rik   | RIKEN cDNA 9630044O09 gene                     | 1.01  | 0.98 | 2.24  | 0.1974 | 1.62  | 0.324  | 1.17  | 0.6111 | 1.93  | 0.4332 |
| 160237_at   | 1448427_at   | Ndufa6          | NADH dehydrogenase (ubiquinone) 1 alpha        | 1.1   | 0.64 | 1.2   | 0.0165 | 1.27  | 0.0255 | 1.24  | 0.0142 | 1.3   | 0.1066 |
| 160239_at   | 1423697_at   | 2400006A19Rik   | RIKEN cDNA 2400006A19 gene                     | 1.33  | 0.28 | 1.01  | 0.9036 | 1.05  | 0.5122 | 1.05  | 0.2043 | -1.46 | 0.005  |
| 160242_at   | 1423663_at   | Fln             | folliculin                                     | 1.02  | 0.9  | 1.27  | 0.0528 | 1.39  | 0.0099 | 1.33  | 0.0002 | 1.58  | 0.0029 |
| 160243_r_at | 1426650_at   | Myh8 /// LOC38  | myosin, heavy polypeptide 8, skeletal muscl    | -2.62 | 0.32 | -9.61 | 0.2851 | -8.46 | 0.2924 | -8.5  | 0.2922 | 2.79  | 0.0335 |
| 160245_at   | 1453013_at   | 1110034O07Rik   | RIKEN cDNA 1110034O07 gene                     | 1.41  | 0.23 | 1.1   | 0.1499 | 1.11  | 0.3475 | 1.16  | 0.021  | 2.26  | 0.3064 |
| 160246_at   | 1416950_at   | Tnfaip8         | tumor necrosis factor, alpha-induced protein   | 2.25  | 0.04 | 1.3   | 0.0606 | 1.35  | 0.1078 | 1.46  | 0.0451 | 1.47  | 0.2386 |
| 160247_at   | 1417983_a_at | Ube2v2          | ubiquitin-conjugating enzyme E2 variant 2      | 2.1   | 0.11 | 1.33  | 0.0254 | 1.18  | 0.386  | 1.21  | 0.1053 | 1.1   | 0.4392 |
| 160248_at   | 1433482_a_at | Fubp1           | far upstream element (FUSE) binding protei     | 3.91  | 0.23 | 1.52  | 0.2265 | 1.09  | 0.7598 | 2.1   | 0.0025 | -2.35 | 0.0254 |
| 160249_at   | 1419493_a_at | Tpd52           | tumor protein D52                              | -1.2  | 0.37 | 1.24  | 0.2194 | 1.15  | 0.4243 | 1.36  | 0.3495 | -1.03 | 0.8351 |
| 160251_at   | 1427876_at   | 2610312B22Rik   | RIKEN cDNA 2610312B22 gene                     | 1.17  | 0.58 | 1.11  | 0.1211 | 1.28  | 0.0451 | 1.12  | 0.0433 | 1.07  | 0.603  |
| 160252_at   | 1454626_at   | Cltc            | clathrin, heavy polypeptide (Hc)               | 1.08  | 0.61 | 1.24  | 0.0002 | 1.17  | 0.0075 | 1.31  | 0.0005 | 1.12  | 0.0442 |
| 160253_at   | 1423754_at   | Ilfim3          | interferon induced transmembrane protein 3     | -1.28 | 0.09 | -1.02 | 0.855  | -1.04 | 0.4526 | 1.01  | 0.9661 | -1.43 | 0.0739 |
| 160254_at   | 1424254_at   | Ilfim1          | interferon induced transmembrane protein 1     | -1.11 | 0.67 | -1.05 | 0.7497 | 1.12  | 0.3662 | -1.05 | 0.6672 | 1.06  | 0.7476 |
| 160255_at   | 1452217_at   | Ahnak           | AHNAK nucleoprotein (desmoyokin)               | 1.74  | 0    | 1.46  | 0.0595 | 1.24  | 0.3222 | 1.85  | 0.004  | 6.38  | 0.0051 |
| 160256_at   | 1434732_x_at | Tom7            | Translocase of outer mitochondrial membrar     | 1.26  | 0.26 | 1.01  | 0.8562 | -1.04 | 0.563  | 1.01  | 0.8163 | -1.12 | 0.0251 |
| 160257_at   | 1448184_at   | Fkbp1a          | FK506 binding protein 1a                       | -1.16 | 0.44 | 1.12  | 0.0654 | 1.07  | 0.2609 | 1.09  | 0.1804 | 1.07  | 0.1786 |
| 160258_at   | 1416765_s_at | MGI:1913699     | mitochondria-associated protein involved in    | 1.07  | 0.82 | 1.02  | 0.7766 | 1     | 0.9444 | 1.01  | 0.9105 | 1.06  | 0.8609 |
| 160260_at   | 1448461_a_at | 1500006O09Rik   | RIKEN cDNA 1500006O09 gene                     | 1.22  | 0.33 | 1.08  | 0.3846 | 1.09  | 0.5588 | 1.22  | 0.0657 | 1.2   | 0.6283 |
| 160262_at   | 1438843_x_at | Mtch2           | mitochondrial carrier homolog 2 (C. elegans)   | -1.01 | 0.94 | -1.03 | 0.6872 | 1.16  | 0.0397 | 1.07  | 0.3956 | -1.22 | 0.0985 |
| 160265_at   | 1415723_at   | Eif5            | eukaryotic translation initiation factor 5     | 1.27  | 0.43 | 1.06  | 0.3972 | 1.31  | 0.0121 | 1.08  | 0.3085 | -1.16 | 0.2147 |
| 160266_r_at | 1451144_at   | 1110064N10Rik   | RIKEN cDNA 1110064N10 gene                     | 1.05  | 0.81 | 1.15  | 0.5149 | 1.17  | 0.5771 | -1.01 | 0.9421 | -1.41 | 0.0182 |
| 160267_at   | 1448882_at   | 0610009E20Rik   | RIKEN cDNA 0610009E20 gene                     | 1.36  | 0.03 | -1.15 | 0.3766 | -1.13 | 0.3871 | -1.16 | 0.3175 | -1.16 | 0.1276 |
| 160268_at   | 1424002_at   | Pdcl3           | phosducin-like 3                               | -1.01 | 0.97 | 1.08  | 0.4441 | -1.04 | 0.6244 | 1.06  | 0.5648 | 1.35  | 0.052  |
| 160269_at   | 1426995_a_at | Gfer            | growth factor, erv1 (S. cerevisiae)-like (augn | 1.07  | 0.64 | 1.06  | 0.5969 | -1.1  | 0.354  | 1.07  | 0.4362 | -1.05 | 0.5326 |
| 160270_at   | 1452671_s_at | Lman1           | lectin, mannose-binding, 1                     | -1.19 | 0.41 | -1.15 | 0.0161 | -1.01 | 0.9167 | -1.1  | 0.1343 | -1.46 | 0.0058 |
| 160271_at   | 1428380_at   | 0610007C21Rik   | RIKEN cDNA 0610007C21 gene                     | 1.37  | 0.01 | 1.02  | 0.7088 | 1.01  | 0.7971 | 1.09  | 0.2433 | 1.1   | 0.1864 |
| 160272_at   | 1448504_a_at | ---             | Mus musculus, Similar to heterochromatin-li    | 1.56  | 0    | 1.12  | 0.1642 | 1.05  | 0.4031 | 1.16  | 0.0543 | 1.27  | 0.0727 |
| 160273_at   | 1437626_at   | Zfp36l2         | zinc finger protein 36, C3H type-like 2        | 1.65  | 0.06 | 1.8   | 0      | 1.5   | 0.0032 | 1.86  | 0      | 1.13  | 0.5637 |
| 160274_at   | 1418742_at   | Krt1-4          | keratin complex 1, acidic, gene 4              | -1.1  | 0.09 | 1.08  | 0.5578 | 1.13  | 0.2172 | 1.06  | 0.4759 | -2.45 | 0.1898 |
| 160275_at   | 1418888_a_at | Sepp1           | selenoprotein X 1                              | -1.26 | 0.06 | -1.05 | 0.4311 | -1.06 | 0.237  | -1.13 | 0.0247 | -1.16 | 0.1283 |
| 160277_at   | 1448936_at   | Stx12           | syntaxin 12                                    | 1.05  | 0.81 | -1.08 | 0.3536 | 1.01  | 0.9191 | -1.06 | 0.4097 | 1.27  | 0.0267 |
| 160278_at   | 1418702_a_at | 2810428I15Rik   | RIKEN cDNA 2810428I15 gene                     | 1.78  | 0.09 | 1.03  | 0.7237 | 1.08  | 0.264  | 1.12  | 0.1255 | -1.43 | 0.1226 |
| 160279_at   | 1427881_at   | 4930588M11Rik   | RIKEN cDNA 4930588M11 gene                     | 2.36  | 0.06 | 1.17  | 0.1526 | 1.03  | 0.7645 | 1.19  | 0.0976 | 1.25  | 0.2345 |
| 160280_at   | 1449145_a_at | Cav1            | caveolin, caveolae protein 1                   | 1.33  | 0.34 | -1.18 | 0.3162 | -1.12 | 0.4441 | -1.07 | 0.7763 | 3.01  | 0.0047 |
| 160282_at   | 1415717_at   | 4931406I20Rik   | RIKEN cDNA 4931406I20 gene                     | -1.43 | 0.08 | -1.13 | 0.1652 | -1.24 | 0.0233 | -1.16 | 0.1022 | 1.17  | 0.0539 |
| 160284_at   | 1418068_at   | Ndufa10         | NADH dehydrogenase (ubiquinone) 1 alpha        | -1.29 | 0.01 | 1     | 0.9991 | 1     | 0.9386 | -1    | 0.9538 | 1.02  | 0.7688 |
| 160285_at   | 1428267_at   | Dhx40           | DEAH (Asp-Glu-Ala-His) box polypeptide 40      | 1.48  | 0.21 | 1.08  | 0.0873 | 1.05  | 0.4387 | 1.12  | 0.0553 | 1.24  | 0.1011 |
| 160286_at   | 1452659_at   | Dek             | DEK oncogene (DNA binding)                     | 1.86  | 0.01 | 1.31  | 0.0922 | 1.14  | 0.3158 | 1.44  | 0.0087 | 1.22  | 0.3966 |
| 160287_at   | 1415930_a_at | Map1lc3b /// LO | microtubule-associated protein 1 light chain   | 1.72  | 0.08 | 1.03  | 0.5535 | 1.4   | 0.0007 | 1.23  | 0.007  | 1.08  | 0.3392 |

|             |              |               |                                                 |       |      |       |        |       |        |       |        |        |        |
|-------------|--------------|---------------|-------------------------------------------------|-------|------|-------|--------|-------|--------|-------|--------|--------|--------|
| 160288_at   | 1415929_at   | Map1lc3b      | microtubule-associated protein 1 light chain    | 1.33  | 0.07 | -1.18 | 0.0033 | 1.21  | 0.033  | -1.01 | 0.8856 | 1.05   | 0.6308 |
| 160290_at   | 1423120_at   | Ide           | insulin degrading enzyme                        | 1.64  | 0.29 | 1.01  | 0.9332 | -1.35 | 0.0064 | -1.28 | 0.0847 | -1.54  | 0.0081 |
| 160291_at   | 1434986_a_at | Sec61a1       | Sec61 alpha 1 subunit (S. cerevisiae)           | 1.01  | 0.97 | -1.02 | 0.7801 | 1.12  | 0.1355 | 1.05  | 0.1952 | -1.5   | 0.0293 |
| 160292_at   | 1432181_s_at | Ecgf1         | endothelial cell growth factor 1 (platelet-deri | -1.05 | 0.77 | -1.08 | 0.5417 | 1.01  | 0.8889 | -1.2  | 0.1037 | -1.26  | 0.0337 |
| 160293_at   | 1459985_at   | 2700038L12Rik | RIKEN cDNA 2700038L12 gene                      | 1.53  | 0.08 | 1.03  | 0.8576 | 1.08  | 0.5741 | 1.11  | 0.4214 | -1.17  | 0.6017 |
| 160294_at   | 1448726_at   | Snopc2        | small nuclear RNA activating complex, poly      | 1.42  | 0.4  | 1.02  | 0.7512 | 1.05  | 0.5213 | 1.08  | 0.1768 | 1.24   | 0.0017 |
| 160296_at   | 1421847_at   | Wsb2          | WD repeat and SOCS box-containing 2             | 1.42  | 0.12 | 1.09  | 0.0636 | 1.07  | 0.4225 | 1.01  | 0.8933 | -1.01  | 0.9507 |
| 160297_at   | 1424465_at   | Al413631      | expressed sequence Al413631                     | 1.46  | 0.25 | 1.17  | 0.0802 | 1.42  | 0.0122 | 1.33  | 0.0078 | -1.14  | 0.3052 |
| 160298_at   | 1424186_at   | 2610001E17Rik | RIKEN cDNA 2610001E17 gene                      | 1.32  | 0.16 | 1.23  | 0.1086 | 1.29  | 0.1609 | 1.35  | 0.0593 | 1.44   | 0.1291 |
| 160299_at   | 1427913_at   | Rwdd1         | RWD domain containing 1                         | 1.18  | 0.22 | -1.05 | 0.4005 | -1.02 | 0.8103 | -1.04 | 0.5084 | 1.06   | 0.5515 |
| 160300_at   | 1448156_at   | Tff1          | trefoil factor 1                                | -1.64 | 0.02 | -1.06 | 0.4893 | -1.09 | 0.2014 | -1.09 | 0.2487 | 1.14   | 0.3648 |
| 160301_at   | 1460670_at   | Riok3         | RIO kinase 3 (yeast)                            | -1.83 | 0.12 | 1.04  | 0.293  | 1.06  | 0.1699 | 1.07  | 0.2663 | -1.26  | 0.0644 |
| 160302_at   | 1451238_at   | 1200003C05Rik | RIKEN cDNA 1200003C05 gene                      | -1.04 | 0.89 | 1.05  | 0.4099 | 1.11  | 0.2415 | 1.06  | 0.5764 | 1.38   | 0.1575 |
| 160303_at   | 1453206_at   | Acad9         | acyl-Coenzyme A dehydrogenase family, m         | 1.17  | 0.51 | -1.51 | 0.0001 | -1.04 | 0.6494 | -1.45 | 0.0001 | -1.29  | 0.0793 |
| 160305_at   | 1437080_s_at | Psmd11        | proteasome (prosome, macropain) 26S subu        | 1     | 1    | 1.08  | 0.3125 | -1.09 | 0.382  | -1.05 | 0.6469 | -1.09  | 0.7225 |
| 160306_at   | 1424737_at   | Thrsp         | thyroid hormone responsive SPOT14 homol         | -1.54 | 0.28 | -2.18 | 0      | -1.6  | 0.0008 | -3.06 | 0      | -24.42 | 0.0006 |
| 160307_at   | 1454605_a_at | Pi4k2a        | phosphatidylinositol 4-kinase type 2 alpha      | 1.03  | 0.83 | -1.18 | 0.0769 | -1.24 | 0.0343 | -1.32 | 0.0157 | -1.12  | 0.6731 |
| 160308_at   | 1421814_at   | ---           | ---                                             | 1.16  | 0.36 | 1.33  | 0.2096 | 1.01  | 0.9402 | 1.48  | 0.1444 | 1.05   | 0.641  |
| 160309_at   | 1423462_at   | Map3k7ip2     | mitogen-activated protein kinase kinase kin     | -1.23 | 0.41 | 1.27  | 0.0009 | 1.27  | 0.0852 | 1.31  | 0.0035 | -1.22  | 0.3753 |
| 160310_at   | 1426931_s_at | D19Bwg1357e   | DNA segment, Chr 19, Brigham & Women's          | 1.24  | 0.3  | 1.01  | 0.9326 | 1.11  | 0.2979 | 1.02  | 0.7394 | 1.32   | 0.0391 |
| 160311_at   | 1416683_at   | Plxn2         | plexin B2                                       | 1.13  | 0.4  | 1.07  | 0.4995 | -1.06 | 0.6113 | 1.1   | 0.3642 | -1.21  | 0.1519 |
| 160312_at   | 1451114_at   | Cklfsf6       | chemokine-like factor super family 6            | -2.47 | 0.03 | -1.17 | 0.0722 | 1.03  | 0.7409 | -1.29 | 0.0098 | -2.47  | 0.002  |
| 160313_at   | 1426827_at   | A730098D12Rik | RIKEN cDNA A730098D12 gene                      | 1.05  | 0.77 | 1.18  | 0.1107 | -1.03 | 0.6702 | 1.24  | 0.0109 | 1.39   | 0.0388 |
| 160314_at   | 1416939_at   | Pyp           | pyrophosphatase                                 | 1.61  | 0.2  | 1.17  | 0.0502 | 1.16  | 0.0546 | 1.28  | 0.0009 | -1.43  | 0.0078 |
| 160316_at   | 1434390_at   | Hnrpu         | Heterogeneous nuclear ribonucleoprotein U       | 1.77  | 0.16 | 1.33  | 0.0096 | 1.14  | 0.2799 | 1.47  | 0.0019 | 1.2    | 0.1567 |
| 160317_at   | 1416591_at   | Rab34         | RAB34, member of RAS oncogene family            | 2.38  | 0.04 | 3.35  | 0.0048 | 3.78  | 0.0028 | 6.13  | 0      | 1.83   | 0.0322 |
| 160318_at   | 1416580_a_at | Stub1         | STIP1 homology and U-Box containing prote       | 1.16  | 0.46 | 1.1   | 0.2876 | 1.16  | 0.2263 | 1.21  | 0.0375 | 1.13   | 0.1612 |
| 160319_at   | 1416114_at   | Sparcl1       | SPARC-like 1 (mast9, hevin)                     | 1.52  | 0.06 | 1.07  | 0.6576 | -1.3  | 0.0637 | 1.18  | 0.3403 | 3.69   | 0.0089 |
| 160320_at   | 1425826_a_at | Sorbs1        | sorbin and SH3 domain containing 1              | 1.82  | 0.26 | 1.19  | 0.1297 | 1.14  | 0.3248 | 1.28  | 0.053  | 1.52   | 0.0054 |
| 160321_at   | 1416083_at   | Za20d2        | zinc finger, A20 domain containing 2            | 1.38  | 0.23 | 1.03  | 0.6916 | -1.26 | 0.0686 | -1.08 | 0.3669 | 1.02   | 0.7159 |
| 160322_at   | 1423759_a_at | 4930403O06Rik | RIKEN cDNA 4930403O06 gene                      | 1.19  | 0.38 | 1     | 0.9745 | 1.04  | 0.7373 | -1.1  | 0.2728 | -1.45  | 0.0106 |
| 160323_at   | 1437423_a_at | Sra1          | steroid receptor RNA activator 1                | 1.37  | 0.2  | -1.27 | 0.0059 | -1.02 | 0.8509 | -1.15 | 0.0575 | -1.49  | 0.0043 |
| 160324_at   | 1448938_at   | Rpa3          | replication protein A3                          | 1.46  | 0.2  | 1.05  | 0.6298 | 1.36  | 0.14   | 1.26  | 0.0247 | -1.01  | 0.9189 |
| 160325_r_at | 1451100_a_at | Cdv3          | carnitine deficiency-associated gene expres     | -1.07 | 0.79 | 1.09  | 0.5689 | -1.09 | 0.6145 | -1.14 | 0.5053 | 1.8    | 0.3725 |
| 160326_at   | 1415704_a_at | Cdv3          | carnitine deficiency-associated gene expres     | 1.53  | 0.13 | 1.19  | 0.0764 | 1.39  | 0.0429 | 1.15  | 0.244  | 1.08   | 0.3945 |
| 160327_at   | 1448368_at   | Dctn6         | dynactin 6                                      | 2.05  | 0.02 | 1.2   | 0.1421 | 1.26  | 0.1039 | 1.31  | 0.0405 | 1.1    | 0.5557 |
| 160328_at   | 1428365_a_at | Prss15        | protease, serine, 15                            | 1.02  | 0.84 | 1.09  | 0.4021 | 1.08  | 0.3997 | 1.09  | 0.4603 | 1.28   | 0.0282 |
| 160329_at   | 1428675_at   | 1110049F12Rik | RIKEN cDNA 1110049F12 gene                      | -1.16 | 0.75 | 1.16  | 0.1345 | 1.15  | 0.2393 | -1.03 | 0.6467 | -1.13  | 0.5524 |
| 160330_at   | 1460645_at   | Chordc1       | cysteine and histidine-rich domain (CHORD)      | -1.1  | 0.68 | -1.06 | 0.6077 | 1.08  | 0.5009 | -1.03 | 0.7744 | 1.14   | 0.4346 |
| 160331_at   | 1420663_at   | Thpok         | T helper-inducing POZ/Krueppel factor           | 1.29  | 0.63 | -1.18 | 0.4435 | -1.08 | 0.7776 | -1.15 | 0.5206 | 1      | 0.9982 |
| 160333_at   | 1416699_at   | 1110008F13Rik | RIKEN cDNA 1110008F13 gene                      | 1.07  | 0.79 | -1.03 | 0.7063 | 1.23  | 0.057  | 1.01  | 0.9395 | 1.06   | 0.5473 |
| 160334_at   | 1421993_a_at | 2410001H17Rik | RIKEN cDNA 2410001H17 gene                      | 1.68  | 0.03 | 1.62  | 0.0508 | 1.12  | 0.5912 | 1.72  | 0.0122 | -1.02  | 0.9602 |
| 160337_at   | 1415977_at   | MGI:1919030   | myo-inositol 1-phosphate synthase A1            | 1     | 0.99 | 1.09  | 0.2844 | -1.05 | 0.4563 | 1.06  | 0.4085 | -1.18  | 0.6091 |
| 160338_at   | 1460428_at   | 1100001D10Rik | RIKEN cDNA 1100001D10 gene                      | 1.56  | 0.01 | -1.03 | 0.7769 | -1.04 | 0.7435 | -1.14 | 0.2738 | -1.27  | 0.1555 |
| 160339_at   | 1448315_a_at | Pycr2         | pyrroline-5-carboxylate reductase family, me    | 1.63  | 0.26 | 1.08  | 0.6848 | -1.16 | 0.3746 | -1.12 | 0.3477 | -1.24  | 0.4356 |
| 160341_at   | 1451262_a_at | MGI:2385237   | JTV1 gene                                       | 1.33  | 0.08 | 1.02  | 0.7781 | 1.11  | 0.1546 | 1.02  | 0.8022 | 1.28   | 0.1698 |
| 160343_at   | 1450891_at   | Srp19         | signal recognition particle 19                  | 1.06  | 0.8  | -1.1  | 0.3391 | 1.14  | 0.333  | -1.03 | 0.7045 | -1.71  | 0.0677 |
| 160344_at   | 1416901_at   | Npc2          | Niemann Pick type C2                            | 1.29  | 0.09 | 1.21  | 0.081  | 1.04  | 0.5423 | 1.21  | 0.1293 | 1.18   | 0.2242 |
| 160345_at   | 1416349_at   | Mrpl34        | mitochondrial ribosomal protein L34             | 1.18  | 0.56 | -1.13 | 0.2097 | -1.1  | 0.214  | -1.18 | 0.0431 | -1.65  | 0.0457 |
| 160346_at   | 1423894_a_at | Dalrd3        | DALR anticodon binding domain containing        | -1.14 | 0.37 | 1.02  | 0.7103 | -1.01 | 0.8014 | -1.05 | 0.1061 | -1.01  | 0.929  |
| 160347_at   | 1423698_at   | D15Ert4785e   | DNA segment, Chr 15, ERATO Doi 785, exp         | 1.07  | 0.45 | 1.03  | 0.6241 | -1.03 | 0.6977 | 1.01  | 0.9213 | 1.12   | 0.3349 |
| 160348_at   | 1452673_at   | Ranbp3        | RAN binding protein 3                           | 1.12  | 0.58 | 1.02  | 0.7469 | 1.15  | 0.0528 | 1.03  | 0.6417 | 1.06   | 0.5549 |
| 160349_at   | 1460177_at   | Cndp2         | CNDP dipeptidase 2 (metallopeptidase M20        | 1.24  | 0.33 | -1.06 | 0.312  | 1.06  | 0.2738 | 1.05  | 0.5289 | 1.01   | 0.9616 |

|             |              |               |                                                  |       |      |       |        |       |        |       |        |       |        |
|-------------|--------------|---------------|--------------------------------------------------|-------|------|-------|--------|-------|--------|-------|--------|-------|--------|
| 160351_at   | 1451243_at   | Rnpep         | arginyl aminopeptidase (aminopeptidase B)        | 2.19  | 0.05 | -1.12 | 0.201  | 1.04  | 0.7099 | -1.07 | 0.3491 | -2.45 | 0.0519 |
| 160352_at   | 1449055_x_at | Pcbp4         | poly(rC) binding protein 4                       | -1.12 | 0.64 | -1.48 | 0.0043 | 1.43  | 0.0463 | 1.37  | 0.0208 | 1.79  | 0.0214 |
| 160354_at   | 1416752_at   | Ldb3          | LIM domain binding 3                             | -2.99 | 0.07 | -2.28 | 0.2908 | -2.15 | 0.3135 | -2.09 | 0.3241 | 2.05  | 0.1861 |
| 160355_at   | 1427099_at   | Maz           | MYC-associated zinc finger protein (purine-t     | -2.04 | 0.4  | 1.02  | 0.8611 | 1.13  | 0.4515 | 1.02  | 0.8525 | 1.22  | 0.2478 |
| 160356_at   | 1423073_at   | 0610011D08Rik | RIKEN cDNA 0610011D08 gene                       | 1.23  | 0.06 | 1.09  | 0.1844 | 1.05  | 0.332  | 1.06  | 0.3392 | -1.38 | 0.019  |
| 160358_at   | 1416072_at   | Cd34          | CD34 antigen                                     | -1.11 | 0.86 | -1.25 | 0.4958 | -1.5  | 0.2365 | 1.25  | 0.5577 | 2.35  | 0.2523 |
| 160359_at   | 1418003_at   | 1190002H23Rik | RIKEN cDNA 1190002H23 gene                       | -1.09 | 0.9  | -1.43 | 0.3963 | -1.1  | 0.7822 | -1.26 | 0.5093 | 1.31  | 0.5296 |
| 160360_at   | 1448903_at   | MGI:1927947   | selenoprotein                                    | -1.19 | 0.36 | 1.15  | 0.0236 | 1.12  | 0.136  | 1.1   | 0.0449 | -1.86 | 0.0003 |
| 160361_at   | 1415674_a_at | Trappc4       | trafficking protein particle complex 4           | 2.05  | 0.01 | 1.51  | 0      | 1.22  | 0.128  | 1.3   | 0.0156 | 1.15  | 0.3307 |
| 160362_at   | 1433576_at   | Mat2a         | methionine adenosyltransferase II, alpha         | -1.04 | 0.77 | 1.02  | 0.8524 | 1.15  | 0.1306 | 1.18  | 0.1674 | 1.13  | 0.4876 |
| 160363_at   | 1418284_at   | Tcf1          | transcription factor-like 1                      | 2.05  | 0.07 | 1.08  | 0.408  | -1.02 | 0.8352 | 1.02  | 0.8032 | 1.03  | 0.8962 |
| 160364_at   | 1427432_a_at | Sfrs10        | splicing factor, arginine/serine-rich 10 (transl | 1.65  | 0.05 | 1.26  | 0.0551 | 1.34  | 0.067  | 1.51  | 0.0012 | 1.3   | 0.2691 |
| 160365_at   | 1448819_at   | Eif2s2        | eukaryotic translation initiation factor 2, subu | -1.41 | 0.35 | 1.04  | 0.7213 | 1.11  | 0.604  | -1.02 | 0.8927 | -1.67 | 0.2197 |
| 160366_at   | 1415752_at   | BC031181      | cDNA sequence BC031181                           | 1.16  | 0.17 | 1.06  | 0.4275 | 1.19  | 0.0682 | 1.12  | 0.1287 | -1.24 | 0.0193 |
| 160367_at   | 1428319_at   | Pdlim7        | PDZ and LIM domain 7                             | -1.3  | 0.51 | 1.58  | 0.3033 | 1.81  | 0.1386 | 2.15  | 0.0378 | -1.35 | 0.4281 |
| 160369_at   | 1451895_a_at | Dhcr24        | 24-dehydrocholesterol reductase                  | -1.15 | 0.35 | -1.16 | 0.1223 | -1.05 | 0.5206 | -1.15 | 0.1807 | -1.07 | 0.7908 |
| 160370_at   | 1416552_at   | Dppa5         | developmental pluripotency associated 5          | 1.19  | 0.6  | 1.5   | 0.2467 | 1.05  | 0.8694 | 1.4   | 0.3887 | 1.68  | 0.3187 |
| 160371_at   | 1423818_a_at | Arl6jp1       | ADP-ribosylation factor-like 6 interacting pro   | -1    | 1    | 1.39  | 0.0165 | 1.31  | 0.0682 | 1.52  | 0.0157 | 1.1   | 0.4921 |
| 160373_i_at | 1416778_at   | Sdpr          | serum deprivation response                       | 3.77  | 0.01 | 1.02  | 0.8376 | 1.22  | 0.3354 | -1.11 | 0.39   | 1.66  | 0.0765 |
| 160375_at   | 1449434_at   | ---           | ---                                              | -1.12 | 0.09 | 1.04  | 0.6436 | -1.18 | 0.155  | -1.18 | 0.0733 | 1.07  | 0.6248 |
| 160376_at   | 1452646_at   | Trp53inp2     | tumor protein p53 inducible nuclear protein 2    | -1.56 | 0.03 | -1.94 | 0      | -1.23 | 0.0062 | -1.9  | 0      | -3.49 | 0.0003 |
| 160377_at   | 1423723_s_at | Tardbp        | TAR DNA binding protein                          | 1.22  | 0.31 | 1.46  | 0.0007 | 1.19  | 0.0253 | 1.47  | 0      | -1.22 | 0.1296 |
| 160378_at   | 1416032_at   | 1110006115Rik | RIKEN cDNA 1110006115 gene                       | -1.15 | 0.74 | 1.04  | 0.4804 | -1.04 | 0.6702 | 1.01  | 0.8918 | -1.32 | 0.4271 |
| 160379_at   | 1424092_at   | Epb4.1        | erythrocyte protein band 4.1                     | 1.54  | 0.21 | -1.14 | 0.1678 | -1.02 | 0.8685 | -1.08 | 0.4576 | -1.06 | 0.8552 |
| 160380_at   | 1455880_s_at | Ebcn1         | beclin 1 (coiled-coil, myosin-like BCL2-intera   | 1.05  | 0.66 | 1.07  | 0.1627 | 1.08  | 0.3087 | 1.08  | 0.1854 | -1.12 | 0.4701 |
| 160381_at   | 1451266_at   | Mrp150        | mitochondrial ribosomal protein L50              | 2.6   | 0.06 | 1.15  | 0.2168 | 1.19  | 0.2086 | 1.2   | 0.207  | 1.19  | 0.3066 |
| 160382_at   | 1448141_at   | 1110014J01Rik | RIKEN cDNA 1110014J01 gene                       | 1.54  | 0.09 | -1.1  | 0.2089 | -1.08 | 0.3662 | -1.14 | 0.0848 | 1.86  | 0.059  |
| 160383_at   | 1432264_x_at | Cox7a2l       | cytochrome c oxidase subunit VIIa polypepti      | 1.39  | 0.1  | 1.02  | 0.665  | -1.01 | 0.8905 | 1.09  | 0.1368 | 1.03  | 0.6755 |
| 160384_at   | 1448221_at   | Bat1a         | HLA-B-associated transcript 1A                   | 1.25  | 0.17 | 1.08  | 0.1717 | 1.04  | 0.4736 | 1.19  | 0.0032 | 1.09  | 0.343  |
| 160385_at   | 1432164_a_at | Gcsh          | glycine cleavage system protein H (aminom        | -1.24 | 0.03 | -1.18 | 0.0001 | -1.03 | 0.7729 | -1.33 | 0      | -1.28 | 0.0352 |
| 160386_at   | 1423730_at   | C130052112Rik | RIKEN cDNA C130052112 gene                       | 1.08  | 0.72 | -1.17 | 0.122  | -1.03 | 0.7166 | -1.27 | 0.01   | 1.09  | 0.3123 |
| 160387_at   | 1448919_at   | Cd302         | CD302 antigen                                    | 1.17  | 0.24 | -1.07 | 0.3117 | -1.12 | 0.1836 | -1.08 | 0.3341 | -1.41 | 0.0004 |
| 160388_at   | 1423078_a_at | Sc4mol        | sterol-C4-methyl oxidase-like                    | 1.96  | 0.02 | 1.13  | 0.5342 | -1.11 | 0.6943 | -1.19 | 0.4761 | -2.45 | 0.0031 |
| 160389_r_at | 1450925_a_at | Rps27l        | ribosomal protein S27-like                       | -6.58 | 0    | 1.3   | 0.2039 | 1.14  | 0.4058 | 1.08  | 0.5167 | 1.8   | 0.0782 |
| 160390_at   | 1448367_at   | Sdf4          | stromal cell derived factor 4                    | -3.89 | 0.18 | 1.23  | 0.1943 | 1.17  | 0.3136 | 1.22  | 0.5159 | -1.36 | 0.4861 |
| 160391_at   | 1423680_at   | Fads1         | fatty acid desaturase 1                          | 1.1   | 0.61 | -1.41 | 0      | -1.29 | 0.0037 | -1.61 | 0      | -1.58 | 0.0013 |
| 160392_at   | 1433448_at   | B430110G05Ril | RIKEN cDNA B430110G05 gene                       | -1.23 | 0.39 | -1.98 | 0.0001 | -1.19 | 0.1026 | -2.05 | 0      | -1.31 | 0.2082 |
| 160393_at   | 1433514_at   | Etnk1         | ethanolamine kinase 1                            | -1.15 | 0.49 | 1.55  | 0      | 1.25  | 0.0182 | 1.47  | 0.0001 | 1.01  | 0.942  |
| 160394_at   | 1427244_at   | Ttc15         | tetratricopeptide repeat domain 15               | 1.21  | 0.14 | 1.02  | 0.6456 | -1.04 | 0.7863 | 1.07  | 0.1504 | -1.02 | 0.7385 |
| 160395_at   | 1449140_at   | Nudcd2        | NudC domain containing 2                         | 1.22  | 0.4  | 1.16  | 0.3269 | -1.11 | 0.5888 | 1.15  | 0.4657 | -1.37 | 0.0008 |
| 160396_at   | 1423955_a_at | Lass2         | longevity assurance homolog 2 (S. cerevisia      | -1.16 | 0.12 | -1.41 | 0.0004 | -1.35 | 0.0007 | -1.4  | 0.0015 | -1.37 | 0.1248 |
| 160397_at   | 1451113_a_at | Ik            | IK cytokine                                      | 2.46  | 0.05 | 1.32  | 0.0476 | 1.19  | 0.2729 | 1.41  | 0.0015 | -1.08 | 0.6534 |
| 160398_at   | 1420486_at   | Nol7          | nucleolar protein 7                              | 1.92  | 0.03 | 1.18  | 0.0676 | 1.2   | 0.2987 | 1.32  | 0.0045 | -1.13 | 0.4502 |
| 160400_at   | 1428090_at   | 2810422B04Rik | RIKEN cDNA 2810422B04 gene                       | 1.46  | 0.11 | -1.09 | 0.2004 | 1.08  | 0.3975 | 1.06  | 0.436  | 1.01  | 0.9306 |
| 160401_r_at | 1423641_s_at | Cnot7         | CCR4-NOT transcription complex, subunit 7        | -4.81 | 0.02 | -1.22 | 0.5449 | -1.19 | 0.6213 | -1.07 | 0.7874 | 1.23  | 0.6484 |
| 160402_at   | 1428263_a_at | Tceb2         | transcription elongation factor B (SIII), polyp  | 1.14  | 0.68 | 1.11  | 0.1351 | 1.2   | 0.0003 | 1.15  | 0.0133 | -1.41 | 0.1143 |
| 160403_at   | 1423225_at   | MGI:1931466   | selenoprotein K                                  | 1.15  | 0.56 | -1.11 | 0.0311 | 1.04  | 0.6396 | -1.06 | 0.3365 | -1.51 | 0.0018 |
| 160404_at   | 1448512_at   | Hils1         | histone H1-like protein in spermatids 1          | 1.72  | 0.44 | -1.03 | 0.8859 | -1.05 | 0.7761 | -1.23 | 0.3405 | 1.45  | 0.1485 |
| 160406_at   | 1450652_at   | Ctsk          | cathepsin K                                      | -1.73 | 0    | 1.4   | 0.221  | 1.37  | 0.1986 | 1.51  | 0.0644 | 1.28  | 0.0378 |
| 160409_at   | 1423282_at   | Pitpna        | phosphatidylinositol transfer protein, alpha     | -1.08 | 0.51 | -1.11 | 0.1547 | 1.13  | 0.0513 | 1.03  | 0.6954 | -1.1  | 0.6055 |
| 160410_at   | 1416254_a_at | Vps16         | vacuolar protein sorting 16 (yeast)              | 1.36  | 0.19 | 1.25  | 0.0678 | 1.21  | 0.1403 | 1.37  | 0.0025 | 1.4   | 0.165  |
| 160412_at   | 1423534_at   | Pdcd2         | programmed cell death 2                          | 2.82  | 0.04 | 1.4   | 0.032  | 1.69  | 0.0502 | 1.41  | 0.0678 | 2.05  | 0.1123 |
| 160413_at   | 1416107_at   | ---           | ---                                              | -1.03 | 0.92 | 1.15  | 0.2552 | 2.39  | 0.0582 | 1.18  | 0.0592 | 1.08  | 0.7897 |

|             |              |                 |                                                 |       |      |       |        |       |        |       |        |       |        |
|-------------|--------------|-----------------|-------------------------------------------------|-------|------|-------|--------|-------|--------|-------|--------|-------|--------|
| 160414_at   | 1427295_at   | 1810073N04Rik   | RIKEN cDNA 1810073N04 gene                      | 1.13  | 0.46 | -1.07 | 0.0888 | -1.08 | 0.4671 | -1.09 | 0.2922 | -1.61 | 0.0069 |
| 160415_at   | 1437932_a_at | Cldn1           | claudin 1                                       | -1.46 | 0.12 | 1.08  | 0.5896 | -1.14 | 0.2387 | -1.33 | 0.0473 | 1.01  | 0.9682 |
| 160416_at   | 1416859_at   | Fkbp3           | FK506 binding protein 3                         | -1.47 | 0.16 | -1    | 0.9736 | 1.23  | 0.1128 | 1.05  | 0.5942 | 1.26  | 0.1555 |
| 160417_at   | 1418429_at   | Kif5b           | kinesin family member 5B                        | 1.24  | 0.59 | -1.07 | 0.5169 | -1.37 | 0.0044 | -1.15 | 0.2456 | -1.05 | 0.7722 |
| 160418_at   | 1436391_s_at | MGI:2385186     | Mid-1-related chloride channel 1                | -1.39 | 0.14 | 1.42  | 0.0069 | 1.38  | 0.0439 | 1.33  | 0.024  | 1.18  | 0.5731 |
| 160419_r_at | 1423928_at   | Phgdh1          | phosphoglycerate dehydrogenase like 1           | 2.42  | 0.12 | 1.29  | 0.1556 | -1.18 | 0.4113 | -1.01 | 0.9419 | -1.46 | 0.4468 |
| 160422_at   | 1422482_at   | Ruvbl2          | RuvB-like protein 2                             | 1.18  | 0.36 | -1.13 | 0.0523 | -1.05 | 0.4645 | -1.02 | 0.5714 | 1.32  | 0.0277 |
| 160423_at   | 1420846_at   | Mrps2           | mitochondrial ribosomal protein S2              | 1.29  | 0.15 | 1.12  | 0.161  | 1.12  | 0.2757 | 1.24  | 0.0034 | -1.05 | 0.724  |
| 160425_at   | 1454116_a_at | 2410017118Rik   | RIKEN cDNA 2410017118 gene                      | 2.31  | 0.02 | 1.18  | 0.1941 | 1.48  | 0.029  | 1.37  | 0.0592 | 1.21  | 0.3371 |
| 160426_at   | 1417041_at   | Rpo1-1          | RNA polymerase 1-1                              | 1.07  | 0.62 | -1.03 | 0.462  | 1.15  | 0.0019 | -1.05 | 0.4041 | -1.11 | 0.213  |
| 160427_at   | 1428084_at   | Hrb2            | HIV-1 Rev binding protein 2                     | 1.1   | 0.58 | 1.11  | 0.1058 | 1.16  | 0.1033 | 1.06  | 0.3497 | -1.02 | 0.942  |
| 160428_at   | 1427441_a_at | Suclg2          | succinate-Coenzyme A ligase, GDP-forming        | 1.18  | 0.36 | 1.14  | 0.1118 | 1.07  | 0.4616 | 1.09  | 0.2958 | -1.18 | 0.0826 |
| 160429_at   | 1422488_at   | Nxt1            | NTF2-related export protein 1                   | 1.07  | 0.61 | 1.01  | 0.9316 | 1.16  | 0.0181 | 1.04  | 0.5553 | -1.03 | 0.7812 |
| 160430_at   | 1420811_a_at | Catnb           | catenin beta                                    | 1.12  | 0.48 | -1.12 | 0.1735 | -1.02 | 0.8577 | -1.2  | 0.038  | -1.53 | 0.0004 |
| 160431_at   | 1452048_at   | Mrpl12          | mitochondrial ribosomal protein L12             | 1.74  | 0    | 1     | 0.958  | 1.21  | 0.0396 | 1.17  | 0.1279 | 1.1   | 0.6059 |
| 160432_at   | 1434305_at   | U2af14          | U2 small nuclear RNA auxiliary factor 1-like    | 1.45  | 0.21 | -1.05 | 0.1753 | -1.06 | 0.3241 | -1.02 | 0.7052 | -1.03 | 0.6762 |
| 160433_at   | 1456716_s_at | 3110002H16Rik   | RIKEN cDNA 3110002H16 gene                      | -1.05 | 0.68 | 1.03  | 0.7251 | 1.09  | 0.3166 | 1.14  | 0.145  | 1.18  | 0.1208 |
| 160434_at   | 1448867_at   | 2310004K06Rik   | RIKEN cDNA 2310004K06 gene                      | 1.19  | 0.14 | -1.09 | 0.0356 | -1.07 | 0.2443 | -1.05 | 0.2108 | -1.19 | 0.2527 |
| 160435_at   | 1423965_at   | Cd99l2          | Cd99 antigen-like 2                             | 1.1   | 0.83 | -1.09 | 0.1841 | 1.01  | 0.8675 | -1.18 | 0.077  | 1.34  | 0.0511 |
| 160437_at   | 1449097_at   | Txnrd2          | thioredoxin reductase 2                         | 1.87  | 0.04 | 1.1   | 0.4545 | 1.06  | 0.6053 | 1.03  | 0.7869 | 1.36  | 0.1065 |
| 160439_at   | 1423273_at   | Polg            | polymerase (DNA directed), gamma                | 1.4   | 0.44 | -1.34 | 0.0757 | -1.27 | 0.2442 | -1.4  | 0.0472 | 1.03  | 0.9141 |
| 160440_at   | 1422487_at   | Smad4           | MAD homolog 4 (Drosophila)                      | 1.9   | 0.02 | 1.11  | 0.315  | 1.13  | 0.215  | 1.16  | 0.1893 | 1.38  | 0.0779 |
| 160441_at   | 1448197_at   | Ceacam11        | CEA-related cell adhesion molecule 11           | -1.6  | 0.28 | -1.52 | 0.0313 | -1.11 | 0.5306 | -1.4  | 0.0496 | 1.24  | 0.5554 |
| 160442_at   | 1433535_x_at | Cct2            | chaperonin subunit 2 (beta)                     | 1.13  | 0.49 | -1.14 | 0.1274 | -1.07 | 0.4553 | 1.01  | 0.838  | 1.01  | 0.9583 |
| 160444_at   | 1425134_a_at | Pigx            | phosphatidylinositol glycan, class X            | 1.09  | 0.53 | -1.19 | 0.0475 | 1.06  | 0.5479 | -1.16 | 0.1174 | -1.08 | 0.6723 |
| 160445_at   | 1453848_s_at | Zbed3           | zinc finger, BED domain containing 3            | -1.93 | 0.01 | -1.22 | 0.0038 | -1.19 | 0.0739 | -1.28 | 0.0023 | 1.32  | 0.0385 |
| 160446_at   | 1423719_at   | U46068          | cDNA sequence U46068                            | -2.53 | 0.27 | 1.1   | 0.6912 | -1.04 | 0.8291 | -1.07 | 0.6694 | 2.2   | 0.2126 |
| 160447_at   | 1423195_at   | Hiat1           | hippocampus abundant gene transcript 1          | 1.13  | 0.54 | 1.13  | 0.0644 | 1.18  | 0.2884 | 1.13  | 0.1256 | 1.11  | 0.4584 |
| 160448_at   | 1426844_a_at | 6030457N17Rik   | RIKEN cDNA 6030457N17 gene                      | -1.01 | 0.96 | -1.09 | 0.2289 | -1.03 | 0.6218 | -1.01 | 0.8837 | -1    | 0.964  |
| 160449_at   | 1416018_at   | Dr1             | down-regulator of transcription 1               | 1.13  | 0.46 | 1.16  | 0.0133 | 1.24  | 0.0408 | 1.13  | 0.248  | -1.03 | 0.8586 |
| 160450_at   | 1423031_at   | ---             | ---                                             | 1.33  | 0.17 | 1.13  | 0.0002 | 1.03  | 0.5829 | 1.08  | 0.1364 | 1.12  | 0.456  |
| 160451_at   | 1451208_at   | Etf1            | eukaryotic translation termination factor 1     | 1.33  | 0.39 | 1.1   | 0.0806 | 1.38  | 0.0005 | 1.16  | 0.0144 | 1.19  | 0.2043 |
| 160453_at   | 1426388_s_at | ---             | ---                                             | 1.04  | 0.86 | 1.07  | 0.5788 | 1.2   | 0.2361 | 1.09  | 0.5947 | 1.34  | 0.071  |
| 160456_at   | 1424136_a_at | Pp1h /// LOC433 | peptidyl prolyl isomerase H /// similar to pept | 3.56  | 0    | 2.02  | 0.041  | 1.78  | 0.235  | 2.35  | 0.0292 | 1.43  | 0.114  |
| 160457_at   | 1416496_at   | Mrfap1          | Morf4 family associated protein 1               | 1.5   | 0.2  | 1.12  | 0.0148 | 1.07  | 0.1556 | 1.08  | 0.0582 | -1.2  | 0.1091 |
| 160458_at   | 1416357_a_at | Mcam            | melanoma cell adhesion molecule                 | 1.24  | 0.3  | 1.19  | 0.201  | 1.35  | 0.0076 | 1.26  | 0.0165 | 1.37  | 0.1685 |
| 160461_f_at | 1416431_at   | Tubb6           | tubulin, beta 6                                 | 1.22  | 0.38 | 1.12  | 0.4913 | 1.04  | 0.6691 | 1.26  | 0.0263 | -1.19 | 0.3432 |
| 160462_f_at | 1415978_at   | Tubb3           | tubulin, beta 3                                 | 1.15  | 0.66 | -1.22 | 0.067  | -1.03 | 0.7401 | -1.1  | 0.1742 | -1.69 | 0.0224 |
| 160463_at   | 1448325_at   | Myd116          | myeloid differentiation primary response ger    | 1.13  | 0.59 | 1.37  | 0.0336 | 1.32  | 0.1979 | 1.34  | 0.0736 | 1.11  | 0.724  |
| 160466_at   | 1429528_at   | Rae1            | RAE1 RNA export 1 homolog (S. pombe)            | 1.73  | 0.02 | 1.19  | 0.0185 | 1.26  | 0.0061 | 1.32  | 0.0007 | 1.55  | 0.1276 |
| 160468_at   | 1420473_at   | Mtpn            | myotrophin                                      | 1.11  | 0.54 | 1.39  | 0.0143 | 1.02  | 0.9012 | 1.14  | 0.2667 | -1.05 | 0.7568 |
| 160469_at   | 1421811_at   | Thbs1           | thrombospondin 1                                | 1.2   | 0.78 | 1.55  | 0.1081 | 1.09  | 0.7433 | 1.21  | 0.5121 | 3.8   | 0.0602 |
| 160470_at   | 1448488_at   | Mrps5           | mitochondrial ribosomal protein S5              | 2.46  | 0.11 | 1.44  | 0.0144 | 1.33  | 0.0454 | 1.43  | 0.0211 | -1.76 | 0.0426 |
| 160471_at   | 1460168_at   | Slbp            | stem-loop binding protein                       | 1.88  | 0.02 | 1.25  | 0.1398 | 1.14  | 0.3959 | 1.35  | 0.0066 | 1.42  | 0.163  |
| 160472_r_at | 1426649_at   | Tmeff1          | transmembrane protein with EGF-like and tv      | -1.12 | 0.83 | -1.12 | 0.7735 | -1.24 | 0.6452 | -1.76 | 0.3264 | 1.37  | 0.5003 |
| 160473_at   | 1416798_a_at | Nme4            | expressed in non-metastatic cells 4, protein    | 1.93  | 0.14 | 1.16  | 0.3997 | -1.03 | 0.8852 | 1.66  | 0.0036 | -1.52 | 0.2707 |
| 160475_at   | 1450418_a_at | 2310034L04Rik   | RIKEN cDNA 2310034L04 gene                      | -1.28 | 0.4  | -1.17 | 0.06   | -1.15 | 0.2185 | -1.36 | 0.0033 | 1.14  | 0.405  |
| 160476_f_at | 1436699_x_at | Rpl18           | ribosomal protein L18                           | 1.24  | 0.27 | 1.03  | 0.5831 | 1.09  | 0.1661 | 1.11  | 0.0929 | 1.3   | 0.1078 |
| 160477_at   | 1424085_at   | Ndufa4          | NADH dehydrogenase (ubiquinone) 1 alpha         | -1.4  | 0.45 | 1.21  | 0.2302 | -1.02 | 0.9305 | 1.23  | 0.168  | -1.16 | 0.698  |
| 160479_at   | 1416430_at   | Cat             | catalase                                        | -1.36 | 0.08 | 1.09  | 0.1978 | -1.09 | 0.2409 | 1.09  | 0.2767 | -1.2  | 0.1374 |
| 160480_at   | 1426794_at   | Ptprs           | protein tyrosine phosphatase, receptor type,    | 1.26  | 0.41 | 1.42  | 0.0093 | -1.01 | 0.9685 | 1.46  | 0.0086 | 1.84  | 0.0425 |
| 160481_at   | 1423439_at   | Pck1            | phosphoenolpyruvate carboxykinase 1, cyto       | 1.44  | 0.06 | 1.39  | 0.004  | 1.33  | 0.0087 | 1.65  | 0      | 1.46  | 0.1047 |
| 160482_at   | 1456011_x_at | Acaa1           | acetyl-Coenzyme A acyltransferase 1             | 1.81  | 0.05 | 1.21  | 0.0034 | 1.14  | 0.0777 | 1.25  | 0.009  | -1.04 | 0.8319 |

|             |              |               |                                              |       |      |       |        |       |        |       |        |       |        |
|-------------|--------------|---------------|----------------------------------------------|-------|------|-------|--------|-------|--------|-------|--------|-------|--------|
| 160483_at   | 1416723_at   | Tcf4          | transcription factor 4                       | 1.54  | 0.23 | -1.15 | 0.1095 | -1.12 | 0.1412 | -1.16 | 0.0823 | 1.19  | 0.367  |
| 160484_at   | 1452649_at   | Rtn4          | reticulin 4                                  | 1.38  | 0.13 | 1.01  | 0.9383 | 1.01  | 0.9594 | -1.05 | 0.6199 | -1.58 | 0.0128 |
| 160485_r_at | 1435702_s_at | Ywhae         | tyrosine 3-monooxygenase/tryptophan 5-mo     | 1.2   | 0.6  | -1.14 | 0.0535 | 1.09  | 0.4493 | 1.03  | 0.669  | 1.27  | 0.3298 |
| 160487_at   | 1422580_at   | Myl4          | myosin, light polypeptide 4                  | -1.36 | 0.39 | -1.02 | 0.8993 | 1.6   | 0.0025 | 1.23  | 0.2652 | -1.2  | 0.5455 |
| 160488_at   | 1424166_at   | Msh3          | mutS homolog 3 (E. coli)                     | 1.51  | 0.39 | 1.14  | 0.3522 | 1.3   | 0.0112 | 1.11  | 0.33   | 1.26  | 0.3919 |
| 160489_at   | 1438855_x_at | ---           | ---                                          | 1.05  | 0.83 | -1.07 | 0.6836 | -1.19 | 0.0872 | 1.12  | 0.6321 | -1.61 | 0.0872 |
| 160490_at   | 1415853_at   | Def8          | differentially expressed in FDCP 8           | -1.02 | 0.8  | -1.15 | 0.0149 | -1.34 | 0.0014 | -1.24 | 0.0005 | -1.31 | 0.0792 |
| 160492_at   | 1416071_at   | Ddx18         | DEAD (Asp-Glu-Ala-Asp) box polypeptide 18    | -1.01 | 0.95 | -1.21 | 0.0648 | -1.2  | 0.0241 | -1.09 | 0.2263 | 1.06  | 0.6885 |
| 160494_at   | 1438317_a_at | Endog         | endonuclease G                               | -1.14 | 0.25 | 1.03  | 0.7781 | 1.01  | 0.9374 | -1.14 | 0.2231 | 1.3   | 0.1564 |
| 160495_at   | 1422631_at   | Ahr           | aryl-hydrocarbon receptor                    | 1.41  | 0.31 | 1.15  | 0.0441 | 1.2   | 0.1648 | 1.13  | 0.1123 | 1.36  | 0.0902 |
| 160496_s_at | 1449705_x_at | ---           | ---                                          | -1.42 | 0.23 | 1.01  | 0.9541 | 1.04  | 0.6222 | 1.12  | 0.2629 | -1.15 | 0.3602 |
| 160497_at   | 1449842_at   | 1810059G22Rik | RIKEN cDNA 1810059G22 gene                   | -1.07 | 0.77 | -1.06 | 0.258  | -1.02 | 0.8011 | -1.03 | 0.7046 | -1.04 | 0.7064 |
| 160498_at   | 1452024_a_at | Ldb1          | LIM domain binding 1                         | -1.39 | 0.18 | 1.36  | 0.0002 | 1.12  | 0.4187 | 1.63  | 0.0023 | 1.46  | 0.027  |
| 160499_at   | 1415889_a_at | Tra1          | tumor rejection antigen gp96                 | -1.1  | 0.49 | -1.21 | 0.0013 | -1.15 | 0.0336 | -1.32 | 0      | -1.07 | 0.3181 |
| 160501_at   | 1449207_a_at | Kif20a        | kinesin family member 20A                    | 1.51  | 0.56 | 1.16  | 0.727  | -1.02 | 0.9667 | 1.06  | 0.8971 | 1.49  | 0.2613 |
| 160502_at   | 1415948_at   | Creg1         | cellular repressor of E1A-stimulated genes 1 | 1.23  | 0.53 | 1.52  | 0      | 1.39  | 0.0012 | 1.6   | 0      | -1.11 | 0.1811 |
| 160503_at   | 1416685_s_at | Fbl           | fibrillarin                                  | 1.23  | 0.31 | -1.03 | 0.5922 | -1.02 | 0.7685 | -1.01 | 0.8704 | 1.11  | 0.4132 |
| 160504_at   | 1416777_at   | Ceacam12      | CEA-related cell adhesion molecule 12        | -4.55 | 0.1  | 2.42  | 0.0339 | 1.09  | 0.853  | 1.22  | 0.6294 | 1.97  | 0.3555 |
| 160505_at   | 1455808_at   | 4922502D21Rik | RIKEN cDNA 4922502D21 gene                   | -2.05 | 0.09 | 1.76  | 0.1234 | -1.32 | 0.3047 | 2.06  | 0.2178 | 1.32  | 0.5858 |
| 160506_at   | 1423959_at   | Ropn1l        | ropporin 1-like                              | 2.27  | 0.02 | 1.23  | 0.0799 | -1.31 | 0.0979 | 1.16  | 0.182  | 1.1   | 0.6852 |
| 160507_at   | 1428078_at   | 0610013E23Rik | RIKEN cDNA 0610013E23 gene                   | -1.1  | 0.54 | 1.08  | 0.3253 | -1.05 | 0.7201 | -1.06 | 0.5659 | -1.01 | 0.9327 |
| 160508_at   | 1451258_at   | Psca          | prostate stem cell antigen                   | -1.26 | 0.4  | 1.02  | 0.832  | 1.03  | 0.7016 | 1.01  | 0.9292 | 1.28  | 0.2636 |
| 160509_at   | 1416456_a_at | 2200003E03Rik | RIKEN cDNA 2200003E03 gene                   | 1.12  | 0.17 | -1.04 | 0.7366 | -1.01 | 0.9612 | -1.06 | 0.5385 | 1.11  | 0.4604 |
| 160510_f_at | 1422454_at   | Krt11-13      | keratin complex 1, acidic, gene 13           | 1.82  | 0.22 | -1.4  | 0.3743 | -1.55 | 0.2579 | -1.48 | 0.3161 | 1.26  | 0.2688 |
| 160511_at   | 1448823_at   | Cxcl12        | chemokine (C-X-C motif) ligand 12            | 1.09  | 0.63 | 1.22  | 0.1253 | 1.21  | 0.2731 | -1.11 | 0.3868 | 1.06  | 0.5503 |
| 160512_at   | 1423678_at   | BC017643      | cDNA sequence BC017643                       | -1.33 | 0.02 | -1.34 | 0.0088 | -1.33 | 0.0103 | -1.4  | 0.001  | 1.07  | 0.6469 |
| 160513_at   | 1428331_at   | 2210016F16Rik | RIKEN cDNA 2210016F16 gene                   | 1.19  | 0.38 | 1.01  | 0.9298 | 1.14  | 0.1634 | 1.06  | 0.3046 | -1.02 | 0.8347 |
| 160514_at   | 1418277_at   | Rp9h          | retinitis pigmentosa 9 homolog (human)       | 1.56  | 0.14 | -1.06 | 0.503  | -1.06 | 0.4321 | -1.08 | 0.3965 | 1.21  | 0.1405 |
| 160515_at   | 1425422_a_at | Parrn         | poly(A)-specific ribonuclease (deadenylation | 1.04  | 0.73 | 1.08  | 0.1167 | 1.01  | 0.9282 | 1.07  | 0.2877 | 1.21  | 0.1376 |
| 160516_at   | 1419428_a_at | Gaa           | glucosidase, alpha, acid                     | -1.44 | 0.06 | -1.21 | 0.0285 | 1     | 0.9664 | -1.2  | 0.0145 | 1.15  | 0.0359 |
| 160517_at   | 1423521_at   | ---           | ---                                          | 1.16  | 0.52 | -1.12 | 0.1997 | -1.36 | 0.0578 | -1.46 | 0.0066 | -1.56 | 0.0375 |
| 160518_at   | 1460706_s_at | Rer1          | RER1 retention in endoplasmic reticulum 1    | 1.07  | 0.32 | -1.06 | 0.2794 | -1.02 | 0.8529 | -1.13 | 0.0505 | -1.22 | 0.048  |
| 160520_at   | 1448363_at   | Yap1          | yes-associated protein 1                     | -1.32 | 0.07 | -1.04 | 0.3757 | 1.02  | 0.5536 | -1.09 | 0.1059 | -1.05 | 0.5823 |
| 160521_at   | 1426813_at   | 2610020N02Rik | RIKEN cDNA 2610020N02 gene                   | 2.92  | 0.02 | 1.21  | 0.2427 | 1.16  | 0.4067 | 1.13  | 0.2338 | 1.32  | 0.6075 |
| 160522_at   | 1450839_at   | D0H4S114      | DNA segment, human D4S114                    | -3.65 | 0.05 | -4.23 | 0      | -1.48 | 0.0031 | -4.15 | 0      | -1.38 | 0.3899 |
| 160523_at   | 1421104_at   | ---           | ---                                          | 2.83  | 0.01 | 1.19  | 0.5866 | 1.37  | 0.3547 | 1.55  | 0.0934 | 2.11  | 0.008  |
| 160525_f_at | 1426730_a_at | Prlpk         | prolactin-like protein K                     | -1.89 | 0.45 | -1.59 | 0.0219 | -1.37 | 0.1117 | -1.11 | 0.6622 | -1.27 | 0.6823 |
| 160526_s_at | 1418322_at   | Creml         | cAMP responsive element modulator            | -1.66 | 0.02 | -1.17 | 0.2666 | -1.22 | 0.1634 | -1.41 | 0.0166 | 1.27  | 0.2073 |
| 160528_at   | 1448105_at   | Prrm2         | protamine 2                                  | -5.16 | 0.1  | 1.29  | 0.5367 | 1.43  | 0.3182 | -1.16 | 0.648  | -1.01 | 0.9784 |
| 160529_r_at | 1415990_at   | Vdac2         | voltage-dependent anion channel 2            | 1.49  | 0.14 | 1.25  | 0.0566 | 1.06  | 0.6006 | 1.35  | 0.0016 | 1.4   | 0.0893 |
| 160530_at   | 1415881_at   | Ghitm         | growth hormone inducible transmembrane p     | 1.39  | 0.09 | 1.25  | 0.0081 | 1.15  | 0.1571 | 1.25  | 0.0006 | -1.11 | 0.1527 |
| 160531_at   | 1416393_at   | Grccl2f       | gene rich cluster, C2f gene                  | 1.32  | 0.16 | 1.03  | 0.5534 | -1.02 | 0.5148 | 1     | 0.995  | 1.22  | 0.0597 |
| 160532_at   | 1423721_at   | Tpm1          | tropomyosin 1, alpha                         | 1.51  | 0.1  | -1.04 | 0.7073 | 1.06  | 0.2636 | 1.06  | 0.3202 | 1.37  | 0.1231 |
| 160533_r_at | 1415924_at   | Tnp1          | transition protein 1                         | -1.4  | 0.04 | -1.08 | 0.1181 | -1.11 | 0.0689 | -1.11 | 0.1184 | 1.25  | 0.0685 |
| 160534_at   | 1415740_at   | Psmc5         | protease (prosome, macropain) 26S subunit    | 1.16  | 0.42 | -1.01 | 0.8813 | -1.06 | 0.096  | 1.02  | 0.7257 | -1.09 | 0.4542 |
| 160535_at   | 1416331_a_at | Nfe2l1        | nuclear factor, erythroid derived 2,-like 1  | -1.17 | 0.26 | -1.25 | 0.0023 | -1.19 | 0.0234 | -1.41 | 0      | 1.03  | 0.8121 |
| 160536_at   | 1424132_at   | Hras1         | Harvey rat sarcoma virus oncogene 1          | -1.3  | 0.21 | 1.02  | 0.9006 | 1.08  | 0.5001 | -1.2  | 0.144  | -1.32 | 0.0259 |
| 160537_at   | 1418138_at   | Sult1d1       | sulfotransferase family 1D, member 1         | 2.17  | 0.06 | -1.22 | 0.0603 | -1.15 | 0.1769 | -1.09 | 0.2294 | 2.3   | 0.0066 |
| 160538_at   | 1422441_x_at | Cdk4          | cyclin-dependent kinase 4                    | -1.07 | 0.71 | -1.12 | 0.0887 | -1.1  | 0.1549 | -1.03 | 0.4839 | 1.21  | 0.1701 |
| 160540_at   | 1416394_at   | Bag1          | Bcl2-associated athanogene 1                 | 2     | 0.25 | 1.15  | 0.0378 | 1.15  | 0.1389 | 1.17  | 0.056  | 1.03  | 0.8318 |
| 160543_at   | 1422480_at   | Snx3          | sorting nexin 3                              | -1.23 | 0.13 | 1.02  | 0.6805 | -1.07 | 0.3789 | -1.12 | 0.0501 | -1.13 | 0.0479 |
| 160544_at   | 1416022_at   | Fabp5         | fatty acid binding protein 5, epidermal      | -3.81 | 0.06 | -2.28 | 0.0006 | -1.22 | 0.1115 | -2.66 | 0.0004 | -1.63 | 0.2046 |
| 160545_at   | 1415907_at   | Ccnd3         | cyclin D3                                    | 1.3   | 0.31 | 1.2   | 0.0026 | 1.05  | 0.6021 | 1.29  | 0.0011 | 1.34  | 0.0286 |

|             |              |                 |                                                  |       |      |       |        |       |        |       |        |        |        |
|-------------|--------------|-----------------|--------------------------------------------------|-------|------|-------|--------|-------|--------|-------|--------|--------|--------|
| 160546_at   | 1451461_a_at | Aldoc           | aldolase 3, C isoform                            | 1.12  | 0.69 | 1.21  | 0.1145 | 1.18  | 0.1088 | 1.49  | 0.0016 | -1.14  | 0.3723 |
| 160547_s_at | 1415996_at   | Txnip           | thioredoxin interacting protein                  | 1.97  | 0.13 | 1.34  | 0.1271 | 2.69  | 0.0006 | 1.55  | 0.0025 | 2.58   | 0.0792 |
| 160549_at   | 1415741_at   | Tparl           | TPA regulated locus                              | -1.33 | 0.16 | -1.01 | 0.8373 | -1.07 | 0.1875 | -1.07 | 0.1554 | -1.03  | 0.8286 |
| 160550_i_at | 1416212_at   | Magoh           | mago-nashi homolog, proliferation-associate      | 1.26  | 0.44 | 1.03  | 0.5164 | 1.04  | 0.5033 | 1.01  | 0.8234 | 1.04   | 0.6082 |
| 160551_at   | 1416175_a_at | Vdac3           | voltage-dependent anion channel 3                | 1.02  | 0.84 | 1.09  | 0.1499 | 1.06  | 0.1556 | 1.16  | 0.0025 | -1.23  | 0.1288 |
| 160552_at   | 1416087_at   | ---             | ---                                              | -1.34 | 0.09 | 1.14  | 0.1103 | -1.09 | 0.5336 | -1.12 | 0.3585 | -1.11  | 0.5816 |
| 160553_at   | 1416930_at   | Ly6d            | lymphocyte antigen 6 complex, locus D            | -1.23 | 0.67 | 1.09  | 0.5536 | -1.04 | 0.8523 | 1.02  | 0.9119 | -2.31  | 0.1481 |
| 160554_at   | 1460432_a_at | Eif3s6          | eukaryotic translation initiation factor 3, subu | 1.7   | 0.05 | -1.03 | 0.7973 | -1.08 | 0.495  | 1.06  | 0.5233 | 1.58   | 0.041  |
| 160556_at   | 1450895_a_at | 1810020G14Rik   | RIKEN cDNA 1810020G14 gene                       | 1.4   | 0.16 | 1.09  | 0.0848 | 1.1   | 0.4364 | 1.12  | 0.0241 | -1.05  | 0.7623 |
| 160558_at   | 1424480_s_at | Akt2            | thymoma viral proto-oncogene 2                   | 1.35  | 0.07 | -1.11 | 0.2226 | -1.14 | 0.0889 | -1.1  | 0.2553 | 1.08   | 0.7049 |
| 160561_at   | 1416006_at   | Mdk             | midkine                                          | 1.9   | 0.14 | -1.1  | 0.5868 | 1.01  | 0.9462 | -1.07 | 0.7387 | 1.17   | 0.602  |
| 160562_at   | 1415817_s_at | Cct7            | chaperonin subunit 7 (eta)                       | 1.51  | 0.03 | 1.1   | 0.2207 | 1.05  | 0.5565 | 1.06  | 0.3954 | 1.25   | 0.0802 |
| 160564_at   | 1427747_a_at | Lcn2            | lipocalin 2                                      | 6.35  | 0.08 | 6.21  | 0.2286 | -1.48 | 0.1302 | 9.82  | 0.1164 | -10.78 | 0.3048 |
| 160565_at   | 1417089_a_at | Ckmt1           | creatine kinase, mitochondrial 1, ubiquitous     | 1.17  | 0.64 | 1.37  | 0.1728 | 1.56  | 0.2207 | 1.07  | 0.8081 | 1.75   | 0.3212 |
| 160567_at   | 1448120_at   | Gdf9            | growth differentiation factor 9                  | -1.1  | 0.4  | 1.1   | 0.6096 | 1.13  | 0.5709 | 1.11  | 0.5981 | 1.86   | 0.1482 |
| 160568_at   | 1427404_x_at | Eno1            | enolase 1, alpha non-neuron                      | 1.78  | 0.04 | -1.06 | 0.5675 | 1.24  | 0.1396 | 1.2   | 0.1789 | 1.09   | 0.1491 |
| 160569_at   | 1449139_at   | 2310008M10Rik   | RIKEN cDNA 2310008M10 gene                       | 1.01  | 0.98 | -1.18 | 0.0622 | -1.11 | 0.205  | -1.33 | 0.0001 | -1.48  | 0.0319 |
| 160570_at   | 1448327_at   | Actn2           | actinin alpha 2                                  | -1.24 | 0.61 | -1.28 | 0.021  | -1.06 | 0.591  | -1.16 | 0.0622 | -1.2   | 0.5609 |
| 160571_at   | 1422433_s_at | Idh1            | isocitrate dehydrogenase 1 (NADP+), solubl       | 1.07  | 0.46 | -1.09 | 0.2284 | -1.04 | 0.6991 | -1.11 | 0.0537 | -2.04  | 0.0003 |
| 160572_at   | 1416144_a_at | Dhx15           | DEAH (Asp-Glu-Ala-His) box polypeptide 15        | 1.02  | 0.89 | -1.06 | 0.5357 | -1.02 | 0.701  | -1.14 | 0.0277 | 1.15   | 0.4687 |
| 160573_at   | 1420890_at   | Hccs            | holocytochrome c synthetase                      | 1.52  | 0.3  | 1.09  | 0.3901 | 1.24  | 0.1813 | 1.16  | 0.2318 | -1.22  | 0.5309 |
| 160574_at   | 1416821_at   | Es2el           | expressed sequence 2 embryonic lethal            | 1.42  | 0.44 | 1.31  | 0.0167 | 1.02  | 0.8314 | 1.01  | 0.9561 | -1.09  | 0.8756 |
| 160575_at   | 1454641_at   | Cggbp1          | CGG triplet repeat binding protein 1             | -1.03 | 0.42 | 1.05  | 0.5304 | 1.04  | 0.7922 | -1.02 | 0.8089 | -1.05  | 0.5031 |
| 160577_at   | 1415932_x_at | Atp9a           | ATPase, class II, type 9A                        | -1.55 | 0    | -1.04 | 0.5512 | -1.01 | 0.8466 | -1.06 | 0.1874 | -1.35  | 0.1803 |
| 160578_at   | 1415729_at   | Pdpk1           | 3-phosphoinositide dependent protein kinas       | -1.26 | 0.29 | 1.05  | 0.5245 | 1.04  | 0.4816 | 1.05  | 0.336  | 1.07   | 0.152  |
| 160579_at   | 1417111_at   | Man1a           | mannosidase 1, alpha                             | -1.49 | 0.25 | 1.02  | 0.8142 | 1.06  | 0.5192 | -1.03 | 0.6314 | -1.03  | 0.4192 |
| 160580_at   | 1417110_at   | Man1a           | mannosidase 1, alpha                             | 1.41  | 0.15 | 1.23  | 0.0375 | 1.06  | 0.3737 | 1.16  | 0.0502 | 1.1    | 0.6197 |
| 160581_at   | 1428169_at   | Apg16l          | APG16 autophagy 16-like (S. cerevisiae)          | -1.01 | 0.98 | -1    | 0.9846 | 1.27  | 0.0139 | -1.06 | 0.4765 | -1.2   | 0.3177 |
| 160582_at   | 1418551_at   | Mybpc3          | myosin binding protein C, cardiac                | 1.13  | 0.73 | -1.2  | 0.1601 | -1.02 | 0.8628 | -1.12 | 0.1787 | -1.97  | 0.0606 |
| 160583_at   | 1429379_at   | Xlkd1           | extra cellular link domain-containing 1          | 1.48  | 0.15 | 1.63  | 0.0903 | 1.2   | 0.5705 | 1.43  | 0.2253 | 2.66   | 0.0333 |
| 160585_at   | 1450423_s_at | Bxdc1           | brix domain containing 1                         | 1.47  | 0.3  | 1.23  | 0.2269 | 1.04  | 0.8844 | 1.22  | 0.3856 | 2.54   | 0.0433 |
| 160587_at   | 1436955_at   | Tssc1           | tumor suppressing subtransferable candidat       | 2.49  | 0.09 | 1.44  | 0.1109 | 1.71  | 0.0443 | 1.37  | 0.1564 | 1.3    | 0.5261 |
| 160588_at   | 1428616_at   | Zfp131          | zinc finger protein 131                          | 1.16  | 0.3  | -1.13 | 0.2989 | 1.43  | 0.0019 | -1.03 | 0.7798 | 1.02   | 0.8668 |
| 160590_r_at | 1428635_at   | Comtd1          | catechol-O-methyltransferase domain contai       | 3.46  | 0.04 | 1.9   | 0.0279 | 1.96  | 0.0562 | 1.67  | 0.084  | 1.69   | 0.0504 |
| 160591_at   | 1418967_a_at | St7             | Suppression of tumorigenicity 7                  | 1.47  | 0.56 | 1     | 0.9747 | 1.18  | 0.0211 | 1.02  | 0.8268 | -1.35  | 0.2264 |
| 160592_at   | 1423770_at   | Tmc6            | transmembrane channel-like gene family 6         | 1.14  | 0.33 | -1.06 | 0.3866 | -1.09 | 0.4319 | -1.15 | 0.0416 | 1.14   | 0.3491 |
| 160593_at   | 1423076_at   | Snx9            | sorting nexin 9                                  | -1.1  | 0.32 | -1.04 | 0.0455 | -1.13 | 0.1262 | -1.09 | 0.0078 | 1.04   | 0.7126 |
| 160594_at   | 1418799_a_at | Col17a1         | procollagen, type XVII, alpha 1                  | -2.03 | 0.15 | -2.03 | 0.0128 | -1.67 | 0.0752 | -1.61 | 0.0956 | -1.01  | 0.9799 |
| 160595_at   | 1448555_at   | D15Ert682e      | DNA segment, Chr 15, ERATO Doi 682, exp          | 1.61  | 0.25 | 2.23  | 0.0234 | 1.29  | 0.2971 | 2.31  | 0.0012 | 1.26   | 0.5499 |
| 160596_at   | 1417739_at   | 1110030J09Rik   | RIKEN cDNA 1110030J09 gene                       | 1.47  | 0.28 | 1.19  | 0.0736 | 1.05  | 0.6486 | 1.33  | 0.0057 | 1.07   | 0.8324 |
| 160597_at   | 1448721_at   | D1Ert622e       | DNA segment, Chr 1, ERATO Doi 622, expr          | 1.02  | 0.94 | -1.04 | 0.6648 | 1.33  | 0.0765 | 1.15  | 0.1481 | -1.17  | 0.4695 |
| 160601_at   | 1420643_at   | Lfng            | lunatic fringe gene homolog (Drosophila)         | -1.21 | 0.74 | 1.79  | 0.0026 | 1.31  | 0.0921 | 1.78  | 0.0016 | 1.09   | 0.6718 |
| 160602_at   | 1416843_at   | Pde6d           | phosphodiesterase 6D, cGMP-specific, rod,        | 1.16  | 0.72 | 1.25  | 0.4017 | 1.22  | 0.4782 | 1.41  | 0.1335 | -1.18  | 0.5367 |
| 160603_at   | 1421907_at   | Pparbp          | peroxisome proliferator activated receptor bi    | -3.8  | 0.15 | 1.25  | 0.4749 | -2.37 | 0.0086 | -1.62 | 0.1158 | 2      | 0.0764 |
| 160607_at   | 1434775_at   | Pard3           | par-3 (partitioning defective 3) homolog (C. e   | 1.97  | 0    | 1.15  | 0.3094 | -1.28 | 0.0661 | 1.22  | 0.0808 | 1.3    | 0.323  |
| 160608_at   | 1438097_at   | Rab20           | RAB20, member RAS oncogene family                | 1.13  | 0.48 | 1.26  | 0.4195 | -1.69 | 0.0882 | 1.47  | 0.1172 | 1.15   | 0.495  |
| 160609_at   | 1418774_a_at | Atp7a           | ATPase, Cu++ transporting, alpha polypepti       | 1.04  | 0.93 | 1.13  | 0.2272 | -1.08 | 0.2872 | 1.09  | 0.3678 | -1.07  | 0.8101 |
| 160610_at   | 1420798_s_at | Pcdha4 /// Pcdh | protocadherin alpha 4 /// protocadherin alph     | -1.37 | 0.74 | -1.75 | 0.2037 | 1.03  | 0.9457 | 1.38  | 0.488  | -1.73  | 0.1575 |
| 160612_at   | 1423570_at   | Abcg1           | ATP-binding cassette, sub-family G (WHITE        | 1.01  | 0.94 | 1.2   | 0.0881 | -1.04 | 0.7291 | 1.12  | 0.3785 | 1.49   | 0.0075 |
| 160613_at   | 1417109_at   | Tinagl          | tubulointerstitial nephritis antigen-like        | 1.21  | 0.39 | 1.08  | 0.5408 | 1.23  | 0.1447 | 1.12  | 0.4154 | 1.5    | 0.0149 |
| 160614_at   | 1422553_at   | Pten            | phosphatase and tensin homolog                   | 1.11  | 0.81 | -1.07 | 0.8302 | -2.82 | 0.0099 | -2.17 | 0.0384 | -1.61  | 0.0746 |
| 160615_at   | 1451115_at   | Pias3           | protein inhibitor of activated STAT 3            | 4.76  | 0    | 1.04  | 0.7457 | 1.12  | 0.184  | 1.19  | 0.0253 | 1.01   | 0.9835 |
| 160616_at   | 1427248_at   | Whsc2           | Wolf-Hirschhorn syndrome candidate 2 (hun        | -1.41 | 0.04 | -1.04 | 0.5854 | -1.09 | 0.2947 | -1.13 | 0.0458 | -1.11  | 0.5405 |



|             |              |               |                                               |       |      |       |        |       |        |       |        |       |        |
|-------------|--------------|---------------|-----------------------------------------------|-------|------|-------|--------|-------|--------|-------|--------|-------|--------|
| 160617_at   | 1432543_a_at | Klf13         | Kruppel-like factor 13                        | 2.08  | 0.22 | -1.39 | 0.107  | -1.97 | 0.0119 | -2.13 | 0.0032 | -1.15 | 0.7159 |
| 160618_at   | 1422661_at   | Lgals8        | lectin, galactose binding, soluble 8          | -1.23 | 0.31 | -1.25 | 0.0372 | -1.41 | 0.0172 | -1.56 | 0.007  | -1.54 | 0.2122 |
| 160619_at   | 1452372_at   | 1110063F24Rik | RIKEN cDNA 1110063F24 gene                    | 1.06  | 0.87 | 1.02  | 0.6826 | 1.01  | 0.9025 | -1.03 | 0.5767 | -1.1  | 0.5944 |
| 160620_at   | 1452239_at   | Gt(ROSA)26Sor | gene trap ROSA 26, Philippe Soriano           | 1.29  | 0.44 | -1.06 | 0.6118 | 1.32  | 0.1152 | 1.33  | 0.0881 | -1.02 | 0.9564 |
| 160621_at   | 1416595_at   | Mrps22        | mitochondrial ribosomal protein S22           | 1.75  | 0.1  | 1.19  | 0.2047 | 1.18  | 0.3008 | 1.18  | 0.1645 | -1.17 | 0.54   |
| 160622_at   | 1424123_at   | BC011209      | cDNA sequence BC011209                        | 1.03  | 0.9  | 1.95  | 0.0002 | 1.39  | 0.0315 | 2.09  | 0      | 2.48  | 0.0006 |
| 160623_at   | 1449229_a_at | Cdkl2         | cyclin-dependent kinase-like 2 (CDC2-relate   | -1.15 | 0.8  | -1.57 | 0.0302 | -1.28 | 0.2302 | -1.5  | 0.0743 | -2.02 | 0.2178 |
| 160624_at   | 1426796_at   | Txin          | Taxilin                                       | 1.07  | 0.77 | 1.05  | 0.5587 | -1.04 | 0.6747 | -1.11 | 0.2048 | -1.26 | 0.0759 |
| 160626_at   | 1425350_a_at | Myef2         | myelin basic protein expression factor 2, rep | -1.53 | 0.2  | 1.14  | 0.2708 | 1.33  | 0.0249 | 1.28  | 0.0085 | 1.15  | 0.4542 |
| 160627_at   | 1434607_at   | Ddx52         | DEAD (Asp-Glu-Ala-Asp) box polypeptide 5:     | 1.62  | 0.17 | 1.15  | 0.2734 | 1.17  | 0.3189 | 1.26  | 0.0655 | -1.09 | 0.7571 |
| 160628_at   | 1417823_at   | Gcat          | glycine C-acetyltransferase (2-amino-3-ketol  | 1.35  | 0.18 | -1.05 | 0.5257 | 1.06  | 0.3731 | -1.09 | 0.3601 | -1.03 | 0.9152 |
| 160630_at   | 1434190_at   | Sms           | spermine synthase                             | 1.28  | 0.55 | -1.19 | 0.19   | 1.04  | 0.7097 | -1.31 | 0.0744 | 1.27  | 0.2283 |
| 160631_s_at | 1422654_at   | Sgca          | sarcoglycan, alpha (dystrophin-associated g   | -3.13 | 0.01 | -1.18 | 0.4883 | -1.3  | 0.3149 | -1.41 | 0.2075 | 2.55  | 0.1844 |
| 160632_at   | 1428229_at   | Prkcq         | protein kinase C, nu                          | 1.03  | 0.91 | 1.87  | 0.0003 | 1.86  | 0.0004 | 1.86  | 0      | 1.5   | 0.0194 |
| 160633_at   | 1417724_at   | Thoc4         | THO complex 4                                 | 1     | 0.99 | 1.05  | 0.5891 | -1.04 | 0.6616 | 1.11  | 0.1608 | -1.02 | 0.8954 |
| 160634_at   | 1428751_at   | Pacrg         | Park2 co-regulated                            | 1.67  | 0.36 | -1.01 | 0.969  | 1.54  | 0.1341 | 1.27  | 0.4125 | 1.02  | 0.9356 |
| 160635_at   | 1453819_x_at | Stx18         | syntaxin 18                                   | 1.02  | 0.9  | -1.14 | 0.1921 | -1.12 | 0.2186 | -1.13 | 0.1005 | -1.3  | 0.5029 |
| 160636_at   | 1452599_s_at | Al413582      | expressed sequence Al413582                   | 1.66  | 0.21 | 1.12  | 0.0846 | -1.04 | 0.5695 | 1.22  | 0.0761 | 1.39  | 0.3097 |
| 160637_at   | 1424309_a_at | Mocs2         | molybdenum cofactor synthesis 2               | 1.54  | 0.22 | 1.02  | 0.5421 | -1.01 | 0.8289 | 1.04  | 0.2599 | -1.28 | 0.0382 |
| 160638_at   | 1416868_at   | Cdkn2c        | cyclin-dependent kinase inhibitor 2C (p18, ir | -1.27 | 0.19 | -1.35 | 0.0007 | 1.07  | 0.4991 | -1.17 | 0.0289 | 1.3   | 0.0234 |
| 160639_at   | 1420712_a_at | Hpn           | hepsin                                        | 1.06  | 0.88 | 1.04  | 0.3281 | -1.02 | 0.8406 | 1.08  | 0.1356 | -1.27 | 0.2027 |
| 160640_at   | 1424748_at   | Galnt11       | UDP-N-acetyl-alpha-D-galactosamine:polyp      | -1.15 | 0.72 | -1.03 | 0.7571 | -1.01 | 0.9049 | 1.06  | 0.4542 | -1.16 | 0.3415 |
| 160641_at   | 1416432_at   | Pfkfb3        | 6-phosphofructo-2-kinase/fructose-2,6-biphc   | 1.65  | 0.11 | -1.12 | 0.5239 | 1.54  | 0.0103 | 1.19  | 0.3345 | -1.32 | 0.3184 |
| 160642_at   | 1424042_at   | Tmem5         | transmembrane protein 5                       | -1.1  | 0.79 | -1.1  | 0.4799 | 1.05  | 0.8019 | 1.28  | 0.1001 | 1.49  | 0.0923 |
| 160643_at   | 1449080_at   | Hdac2         | histone deacetylase 2                         | -1.35 | 0.03 | -1.16 | 0.1037 | 1.09  | 0.3563 | 1.18  | 0.33   | -1    | 0.9857 |
| 160644_at   | 1433904_at   | MGI:3055306   | gametogenetin binding protein 1               | -1.19 | 0.45 | 1.11  | 0.2749 | 1.11  | 0.1368 | 1.07  | 0.1927 | 1.33  | 0.0959 |
| 160645_at   | 1421392_a_at | Birc3         | baculoviral IAP repeat-containing 3           | -1.31 | 0.48 | 1.05  | 0.6486 | 1.16  | 0.3959 | 1.25  | 0.1587 | 1.13  | 0.5328 |
| 160646_at   | 1421817_at   | Gsr           | glutathione reductase 1                       | -1.2  | 0.6  | 1.23  | 0.0066 | 1.39  | 0.0062 | 1.52  | 0.0005 | -1.23 | 0.0355 |
| 160647_at   | 1421001_a_at | Car6          | carbonic anhydrase 6                          | -3.81 | 0.1  | -1.29 | 0.2441 | -1.16 | 0.4272 | -1.27 | 0.2251 | -1.75 | 0.2069 |
| 160648_at   | 1422430_at   | Fignl1        | fidgetin-like 1                               | -1.1  | 0.59 | 1.01  | 0.9586 | -1.03 | 0.7295 | -1.03 | 0.7382 | 1.33  | 0.2273 |
| 160649_at   | 1422977_at   | Gp1bb         | glycoprotein Ib, beta polypeptide             | -1.25 | 0.39 | 1     | 0.9898 | 1.08  | 0.5048 | -1.14 | 0.4035 | 1.26  | 0.1291 |
| 160651_at   | 1423323_at   | Tacstd2       | tumor-associated calcium signal transducer    | -1.34 | 0    | 1.12  | 0.5216 | 1.28  | 0.1737 | -1.04 | 0.7261 | 1.12  | 0.7627 |
| 160652_at   | 1448111_at   | Ctps2         | cytidine 5'-triphosphate synthase 2           | 3.81  | 0.01 | 1.21  | 0.1177 | 1.14  | 0.1678 | 1.32  | 0.0207 | 1.55  | 0.0068 |
| 160653_at   | 1426118_a_at | Tomm40        | translocase of outer mitochondrial membran    | 5.9   | 0    | 1.39  | 0.0029 | 1.07  | 0.7097 | 1.29  | 0.045  | -1.72 | 0.4807 |
| 160654_at   | 1428534_at   | 2310073E15Rik | RIKEN cDNA 2310073E15 gene                    | 1.1   | 0.81 | -1.06 | 0.3045 | -1.02 | 0.7189 | -1.14 | 0.0409 | -1    | 0.9824 |
| 160655_at   | 1418018_at   | Cpd           | carboxypeptidase D                            | -1.27 | 0.35 | -1.07 | 0.5737 | -1.13 | 0.4246 | -1.06 | 0.6805 | 1.73  | 0.1596 |
| 160657_at   | 1460669_at   | Ilf3          | interleukin enhancer binding factor 3         | 1.21  | 0.17 | 1.31  | 0.0019 | 1.16  | 0.0204 | 1.32  | 0.0029 | 1.44  | 0.1077 |
| 160658_at   | 1424257_at   | Cdk7          | cyclin-dependent kinase 7 (homolog of Xenc    | -1.12 | 0.25 | -1.02 | 0.862  | 1.03  | 0.8301 | -1.19 | 0.2092 | -1.05 | 0.6868 |
| 160659_at   | 1428823_at   | 2310057G13Rik | RIKEN cDNA 2310057G13 gene                    | 2.09  | 0.3  | 1.56  | 0.0951 | 1.77  | 0.1565 | 1.84  | 0.2168 | 1.11  | 0.7427 |
| 160660_r_at | 1423835_at   | Zfp503        | zinc finger protein 503                       | 1.86  | 0.31 | 1.26  | 0.5635 | 1.45  | 0.2377 | 1.04  | 0.9063 | 1.87  | 0.1068 |
| 160661_at   | 1454621_s_at | 5730472N09Rik | RIKEN cDNA 5730472N09 gene                    | -1.06 | 0.74 | -1.28 | 0.0104 | -1.52 | 0.0013 | -1.53 | 0.0026 | -2.24 | 0.0025 |
| 160663_at   | 1423814_at   | Ddx41         | DEAD (Asp-Glu-Ala-Asp) box polypeptide 4:     | 2.08  | 0.14 | 1.12  | 0.3414 | 1.2   | 0.1372 | 1.02  | 0.8815 | -1.43 | 0.5372 |
| 160666_at   | 1428502_at   | Actr6         | ARP6 actin-related protein 6 homolog (yeas    | 1.51  | 0.14 | 1.41  | 0.013  | 1.49  | 0.0786 | 1.58  | 0      | 1.25  | 0.2364 |
| 160667_at   | 1434920_a_at | Evl           | Ena-vasodilator stimulated phosphoprotein     | 2.45  | 0.15 | 1.22  | 0.5213 | -1.25 | 0.4299 | 1.76  | 0.14   | -2.25 | 0.0845 |
| 160668_at   | 1422511_a_at | Ogfr          | opioid growth factor receptor                 | -1.13 | 0.7  | 1.12  | 0.3243 | 1.04  | 0.7604 | 1.22  | 0.166  | -1.02 | 0.9383 |
| 160669_at   | 1454760_at   | Htatsf1       | HIV TAT specific factor 1                     | 1.14  | 0.33 | 1.23  | 0.0239 | 1.22  | 0.0472 | 1.33  | 0.0168 | 1.25  | 0.0492 |
| 160670_at   | 1448147_at   | Tnfrsf19      | tumor necrosis factor receptor superfamily, r | 1.02  | 0.97 | 6.05  | 0      | 3.46  | 0.0303 | 4.56  | 0.0026 | 1.7   | 0.2917 |
| 160671_at   | 1459992_x_at | Cln8          | ceroid-lipofuscinosis, neuronal 8             | 1.6   | 0.09 | 1.18  | 0.482  | 1.11  | 0.6868 | 1.07  | 0.8086 | 1.6   | 0.2963 |
| 160672_at   | 1423612_at   | Al462438      | expressed sequence Al462438                   | -1.22 | 0.41 | -1.07 | 0.4839 | 1.11  | 0.2182 | -1.16 | 0.1672 | -1.05 | 0.7436 |
| 160673_at   | 1424803_at   | BC020002      | cDNA sequence BC020002                        | 1.01  | 0.98 | 1.08  | 0.7217 | 1.03  | 0.911  | 1.09  | 0.6627 | -1.33 | 0.3274 |
| 160674_at   | 1425381_a_at | Trfr2         | transferrin receptor 2                        | 1.06  | 0.8  | -1.09 | 0.1444 | -1.07 | 0.4984 | -1.15 | 0.0056 | -1.81 | 0.1409 |
| 160676_at   | 1427131_s_at | 1810012N18Rik | RIKEN cDNA 1810012N18 gene                    | -1.63 | 0.18 | 1.16  | 0.0002 | -1.05 | 0.4964 | 1.09  | 0.1412 | 1.18  | 0.1563 |
| 160677_at   | 1451198_at   | Gatad2a       | GATA zinc finger domain containing 2A         | -1.38 | 0.3  | -1.15 | 0.2772 | 1.02  | 0.8974 | -1.17 | 0.3463 | -1.01 | 0.9732 |

|             |              |               |                                               |       |      |       |        |       |        |       |        |       |        |
|-------------|--------------|---------------|-----------------------------------------------|-------|------|-------|--------|-------|--------|-------|--------|-------|--------|
| 160678_at   | 1454604_s_at | Tspan12       | tetraspanin 12                                | 1.05  | 0.88 | -1.04 | 0.7901 | 1.24  | 0.188  | 1.19  | 0.1523 | -1.27 | 0.106  |
| 160679_at   | 1424746_at   | Kif1c         | Kinesin family member 1C                      | 2.01  | 0.06 | -1.09 | 0.2621 | 1.11  | 0.1212 | -1.11 | 0.1645 | 1.06  | 0.6326 |
| 160682_at   | 1433685_a_at | 6430706D22Rik | RIKEN cDNA 6430706D22 gene                    | 1.91  | 0.04 | 1.01  | 0.8927 | -1.07 | 0.6016 | 1.18  | 0.1847 | -1.09 | 0.5549 |
| 160683_at   | 1419657_a_at | C330005L02Rik | RIKEN cDNA C330005L02 gene                    | 1.02  | 0.89 | 1.14  | 0.3657 | 1.19  | 0.3067 | 1.21  | 0.159  | 1.18  | 0.3055 |
| 160684_at   | 1423786_at   | 8430410A17Rik | RIKEN cDNA 8430410A17 gene                    | 1.37  | 0.62 | 1.5   | 0.1918 | 1.46  | 0.2007 | 1.53  | 0.2463 | 1.19  | 0.1196 |
| 160685_at   | 1452660_s_at | Klhl7         | kelch-like 7 (Drosophila)                     | -1.08 | 0.58 | -1.11 | 0.5685 | -1.11 | 0.5773 | -1.31 | 0.1869 | -1.25 | 0.4739 |
| 160686_at   | 1424452_at   | 5730555F13Rik | RIKEN cDNA 5730555F13 gene                    | 2.52  | 0.02 | 1.13  | 0.0523 | 1.22  | 0.0043 | 1.26  | 0.0018 | 1.34  | 0.153  |
| 160688_at   | 1450394_at   | Golph3        | golgi phosphoprotein 3                        | -1.09 | 0.52 | 1.08  | 0.1319 | 1.09  | 0.1571 | 1.12  | 0.0247 | -1.03 | 0.7935 |
| 160690_at   | 1419037_at   | Csnk2a1       | casein kinase II, alpha 1 polypeptide         | -1.16 | 0.4  | -1.02 | 0.7395 | -1.01 | 0.8144 | -1.07 | 0.2829 | -1.01 | 0.9489 |
| 160693_at   | 1416387_at   | ---           | ---                                           | 1.61  | 0.11 | 1.12  | 0.1139 | -1.12 | 0.2181 | 1.01  | 0.8943 | 1.32  | 0.0122 |
| 160694_at   | 1423557_at   | Ifngr2        | interferon gamma receptor 2                   | 1.94  | 0.11 | 1.08  | 0.6554 | -1.08 | 0.6952 | 1.09  | 0.6834 | -1.17 | 0.2814 |
| 160696_at   | 1416812_at   | Tia1          | cytotoxic granule-associated RNA binding pr   | -1.07 | 0.82 | 1.1   | 0.2647 | -1.38 | 0.0417 | -1.15 | 0.3698 | 1.42  | 0.0304 |
| 160697_at   | 1433775_at   | C77080        | expressed sequence C77080                     | 1.65  | 0.15 | -1.1  | 0.4073 | 1.05  | 0.6367 | -1.06 | 0.6309 | -1.2  | 0.1484 |
| 160698_s_at | 1422847_a_at | Prkcd         | protein kinase C, delta                       | -1.12 | 0.18 | 1.22  | 0.0912 | 1.03  | 0.5371 | 1.22  | 0.2907 | 1.36  | 0.1872 |
| 160699_at   | 1448466_at   | Cdca5         | cell division cycle associated 5              | -1.43 | 0.38 | 2.11  | 0.0343 | 1.31  | 0.2946 | 1.68  | 0.1827 | 1.15  | 0.7844 |
| 160701_at   | 1426966_at   | Axin1         | axin 1                                        | -1.07 | 0.7  | 1.21  | 0.0155 | 1.1   | 0.2139 | 1.11  | 0.228  | 1.35  | 0.2804 |
| 160702_at   | 1454681_at   | 2210008M09Rik | RIKEN cDNA 2210008M09 gene                    | -2.85 | 0.43 | -1.17 | 0.7107 | 1.24  | 0.5891 | -1.28 | 0.5459 | -1.11 | 0.8331 |
| 160703_at   | 1452709_at   | Poldip3       | polymerase (DNA-directed), delta interactin   | -1.03 | 0.83 | 1.06  | 0.322  | 1.02  | 0.7489 | 1.07  | 0.3685 | 1.05  | 0.6961 |
| 160704_at   | 1451313_a_at | 1110067D22Rik | RIKEN cDNA 1110067D22 gene                    | -1.52 | 0.08 | -1.07 | 0.4715 | -1.24 | 0.1302 | -1.13 | 0.296  | -1.36 | 0.0555 |
| 160705_at   | 1449031_at   | Cited1        | Cbp/p300-interacting transactivator with Glu  | -3.22 | 0.01 | -1.04 | 0.905  | -1.05 | 0.9015 | -1.28 | 0.5496 | 1.44  | 0.4154 |
| 160706_at   | 1453004_at   | 3110004L20Rik | RIKEN cDNA 3110004L20 gene                    | 1.39  | 0.09 | -1.19 | 0.1334 | 1.22  | 0.2091 | -1.12 | 0.1459 | -1.4  | 0.0003 |
| 160707_at   | 1454648_s_at | D10Wsu102e    | DNA segment, Chr 10, Wayne State Univers      | -1.2  | 0.3  | 1.26  | 0.1359 | -1.15 | 0.5751 | 1.05  | 0.7668 | 1.02  | 0.8711 |
| 160708_at   | 1423025_a_at | Schip1        | schwannomin interacting protein 1             | -1.53 | 0.22 | -1.15 | 0.3642 | 1.05  | 0.7025 | -1.62 | 0.01   | 1.35  | 0.3957 |
| 160709_at   | 1435755_at   | 1110001A16Rik | RIKEN cDNA 1110001A16 gene                    | 2.66  | 0    | 1.14  | 0.1516 | 1.03  | 0.8496 | 1.14  | 0.1787 | -1.08 | 0.6398 |
| 160710_at   | 1426709_a_at | Usp33         | ubiquitin specific protease 33                | 1.19  | 0.69 | 1.16  | 0.0502 | 1.12  | 0.3991 | 1.26  | 0.0157 | -1.35 | 0.1822 |
| 160711_at   | 1419367_at   | Decr1         | 2,4-dienoyl CoA reductase 1, mitochondrial    | 2.27  | 0.05 | 1.21  | 0.0799 | 1.3   | 0.0125 | 1.27  | 0.0164 | -1.33 | 0.0159 |
| 160712_r_at | 1426980_s_at | E130012A19Rik | RIKEN cDNA E130012A19 gene                    | 1.24  | 0.34 | 1.42  | 0.3613 | 1     | 0.9786 | 1.96  | 0.0247 | 2.02  | 0.1214 |
| 160713_at   | 1415941_s_at | AA407930      | expressed sequence AA407930                   | 1.75  | 0.26 | 1.2   | 0.1195 | -1.03 | 0.718  | 1.25  | 0.0384 | -1.02 | 0.917  |
| 160714_at   | 1417694_at   | Gab1          | growth factor receptor bound protein 2-asso   | 4.02  | 0    | 1.24  | 0.1207 | 1.38  | 0.0289 | 1.44  | 0.0187 | 2.43  | 0.0006 |
| 160715_at   | 1451127_at   | AW146242      | expressed sequence AW146242                   | -1.36 | 0.3  | -1.13 | 0.5014 | -1.01 | 0.9586 | -1.02 | 0.9425 | -1.21 | 0.4463 |
| 160716_at   | 1451118_a_at | 2410018C17Rik | RIKEN cDNA 2410018C17 gene                    | 1.65  | 0.04 | -1.03 | 0.8056 | 1.16  | 0.2056 | 1.11  | 0.2954 | 1.3   | 0.217  |
| 160717_at   | 1416841_at   | 1110059E24Rik | RIKEN cDNA 1110059E24 gene                    | 1.08  | 0.61 | 1.01  | 0.8638 | -1.06 | 0.4364 | 1.01  | 0.8458 | 1.01  | 0.906  |
| 160718_at   | 1423097_s_at | Capn7         | calpain 7                                     | 1.06  | 0.78 | 1.23  | 0.0216 | 1.29  | 0.1826 | 1.13  | 0.0579 | -1.25 | 0.0732 |
| 160719_at   | 1451845_a_at | A230072116Rik | RIKEN cDNA A230072116 gene                    | 1.55  | 0.23 | 1.02  | 0.9215 | -1.1  | 0.7287 | 1.15  | 0.4781 | 2.09  | 0.1347 |
| 160721_at   | 1417540_at   | Elf1          | E74-like factor 1                             | -1.6  | 0.48 | -1.23 | 0.2958 | -1.36 | 0.0809 | -1.07 | 0.7083 | 1.23  | 0.7381 |
| 160722_at   | 1428766_at   | Rnmt1         | RNA methyltransferase like 1                  | 1.86  | 0.08 | 1.03  | 0.8242 | 1.13  | 0.2286 | -1    | 0.9941 | 1.14  | 0.2357 |
| 160723_at   | 1428684_at   | 1500001M20Rik | RIKEN cDNA 1500001M20 gene                    | 3.96  | 0.02 | 1.41  | 0.003  | 1.44  | 0.0917 | 1.56  | 0.014  | 1.69  | 0.3167 |
| 160724_at   | 1448478_at   | Trfp          | Trf (TATA binding protein-related factor)-pro | 1.61  | 0.21 | 1.64  | 0.006  | 1.84  | 0.0004 | 1.67  | 0.0052 | 1.74  | 0.0492 |
| 160725_at   | 1434625_at   | 4930432O21Rik | RIKEN cDNA 4930432O21 gene                    | 1.18  | 0.02 | 1.19  | 0.107  | 1.27  | 0.1462 | -1.04 | 0.5948 | -1.03 | 0.8709 |
| 160726_at   | 1417073_a_at | Qk            | quaking                                       | 1.08  | 0.63 | 1.13  | 0.1416 | 1.06  | 0.5408 | 1.17  | 0.0769 | 1.05  | 0.7963 |
| 160727_at   | 1460672_at   | 2410002F23Rik | RIKEN cDNA 2410002F23 gene                    | -1.26 | 0.43 | -1.04 | 0.5843 | -1.12 | 0.1972 | 1.03  | 0.6272 | 1.07  | 0.7942 |
| 160729_f_at | 1417076_at   | Fabp9         | fatty acid binding protein 9, testis          | -1.25 | 0.68 | -1.61 | 0.2112 | -2.02 | 0.0754 | -1.76 | 0.194  | -2.36 | 0.0406 |
| 160732_at   | 1434507_at   | Npepl1        | aminopeptidase-like 1                         | -1.18 | 0.38 | 1.18  | 0.1381 | 1.16  | 0.1704 | 1.17  | 0.1376 | 1.16  | 0.372  |
| 160733_at   | 1451030_at   | Akr1c21       | aldo-keto reductase family 1, member C21      | -1.31 | 0.68 | 1.14  | 0.7536 | 1.22  | 0.5838 | -1.99 | 0.1246 | 1.27  | 0.6019 |
| 160734_at   | 1422593_at   | Ap3s1         | adaptor-related protein complex 3, sigma 1 s  | -1.18 | 0.59 | 1.04  | 0.5376 | 1.05  | 0.5024 | -1.09 | 0.1728 | -1.31 | 0.083  |
| 160735_at   | 1452096_s_at | D230025D16Rik | RIKEN cDNA D230025D16 gene                    | -1.03 | 0.83 | -1.15 | 0.0218 | 1.1   | 0.3138 | -1.15 | 0.0505 | 1.09  | 0.2105 |
| 160736_at   | 1430805_s_at | 4932432N11Rik | RIKEN cDNA 4932432N11 gene                    | 1.22  | 0.64 | 1.14  | 0.4633 | 1.16  | 0.3688 | 1.2   | 0.1604 | 1.07  | 0.7915 |
| 160737_at   | 1420013_s_at | Lss           | lanosterol synthase                           | 1.25  | 0.33 | -1.43 | 0.0836 | -1.21 | 0.3939 | -1.75 | 0.0187 | -1.29 | 0.2222 |
| 160738_at   | 1452835_a_at | Polrmt        | polymerase (RNA) mitochondrial (DNA direc     | 1.52  | 0.04 | 1.03  | 0.498  | 1.2   | 0.0055 | 1.09  | 0.1635 | -1.3  | 0.3365 |
| 160739_at   | 1436746_at   | Prkwnk1       | protein kinase, lysine deficient 1            | -1.08 | 0.83 | 1.02  | 0.8644 | -1.41 | 0.1097 | -1.64 | 0.0145 | -1.49 | 0.3673 |
| 160740_at   | 1454921_at   | Gm561         | gene model 561, (NCBI)                        | 1.72  | 0.08 | 1.01  | 0.9186 | 1.15  | 0.2719 | -1.08 | 0.4808 | -1.13 | 0.6896 |
| 160741_at   | 1439047_s_at | Recql         | RecQ protein-like                             | 1.51  | 0.17 | -1.16 | 0.4839 | -1.09 | 0.6219 | 1.03  | 0.8152 | -1    | 0.9926 |
| 160742_at   | 1415901_at   | Plod3         | procollagen-lysine, 2-oxoglutarate 5-dioxyge  | -1.29 | 0.28 | -1.21 | 0.0106 | -1.13 | 0.1456 | -1.29 | 0.0089 | -1.25 | 0.1892 |

|             |              |               |                                             |       |      |       |        |       |        |       |        |       |        |
|-------------|--------------|---------------|---------------------------------------------|-------|------|-------|--------|-------|--------|-------|--------|-------|--------|
| 160743_at   | 1452743_at   | Pole3         | polymerase (DNA directed), epsilon 3 (p17 c | -1.22 | 0.17 | 1.11  | 0.1411 | -1.04 | 0.4838 | 1.02  | 0.573  | 1.1   | 0.4453 |
| 160744_r_at | 1431763_a_at | Ctrl          | chymotrypsin-like                           | 1.08  | 0.76 | -1.14 | 0.2284 | 1.09  | 0.6616 | -1.06 | 0.5755 | 1.05  | 0.7014 |
| 160745_at   | 1426783_at   | Gcn5l2        | GCN5 general control of amino acid synthes  | -2.39 | 0.29 | -1.38 | 0.3284 | 1.06  | 0.8646 | -1.62 | 0.1653 | 2.19  | 0.0423 |
| 160746_at   | 1450994_at   | Rock1         | Rho-associated coiled-coil forming kinase 1 | 1.7   | 0.12 | 1.31  | 0.1895 | 1.13  | 0.5054 | 1.38  | 0.0513 | 1.12  | 0.6842 |
| 160747_at   | 1425296_a_at | Rgs3          | regulator of G-protein signaling 3          | -1.41 | 0.02 | -1.63 | 0      | -1.29 | 0.0053 | -1.53 | 0.0002 | -1.23 | 0.1804 |
| 160748_at   | 1448431_at   | Asb6          | ankyrin repeat and SOCS box-containing pro  | -1.09 | 0.85 | 1.15  | 0.3442 | 1.17  | 0.2109 | 1.05  | 0.5569 | -1.02 | 0.9104 |
| 160749_at   | 1424192_at   | 1500011H22Rik | RIKEN cDNA 1500011H22 gene                  | -1.14 | 0.52 | -1.15 | 0.3096 | -1.04 | 0.7595 | -1.04 | 0.7341 | -1.11 | 0.738  |
| 160750_at   | 1452062_at   | Prpsap2       | phosphoribosyl pyrophosphate synthetase-a   | -1.03 | 0.93 | -1.08 | 0.3565 | -1.14 | 0.2223 | -1.09 | 0.3083 | -1.25 | 0.4108 |
| 160752_at   | 1428312_at   | 2810002D13Rik | RIKEN cDNA 2810002D13 gene                  | -1.38 | 0.21 | -1.05 | 0.7755 | 1.09  | 0.5783 | 1.17  | 0.2183 | 1.34  | 0.2339 |
| 160753_at   | 1427115_at   | Myh3          | myosin, heavy polypeptide 3, skeletal muscl | -2.46 | 0.35 | 1.21  | 0.5136 | 1.67  | 0.1354 | 1.91  | 0.1875 | 1.79  | 0.3168 |
| 160754_at   | 1448602_at   | Pygm          | muscle glycogen phosphorylase               | -1.78 | 0.33 | -3.38 | 0.282  | -3.12 | 0.2984 | -4.5  | 0.2353 | 1.38  | 0.5796 |
| 160756_at   | 1417744_a_at | Ralb          | v-ral simian leukemia viral oncogene homolc | 1.06  | 0.78 | -1.08 | 0.2365 | -1.19 | 0.0017 | -1.09 | 0.2032 | 1.36  | 0.0735 |
| 160757_at   | 1428101_at   | Rnf38         | ring finger protein 38                      | 1.37  | 0.12 | 1.08  | 0.4973 | 1.02  | 0.8984 | 1.08  | 0.51   | 1.2   | 0.4874 |
| 160758_at   | 1424200_s_at | Seh1l         | SEH1-like (S. cerevisiae                    | 1.4   | 0.26 | 1.06  | 0.4052 | 1.09  | 0.2904 | 1.08  | 0.3147 | 1.16  | 0.4373 |
| 160759_at   | 1417503_at   | Rfc2          | replication factor C (activator 1) 2        | 1.31  | 0.14 | 1.02  | 0.8105 | -1.06 | 0.5188 | -1.12 | 0.093  | -1.2  | 0.1113 |
| 160761_at   | 1417626_at   | Usmg4         | upregulated during skeletal muscle growth 4 | -1.1  | 0.3  | -1.13 | 0.1259 | 1.1   | 0.1666 | -1.06 | 0.3007 | -1    | 0.9759 |
| 160762_at   | 1433477_at   | Abr           | active BCR-related gene                     | -2.95 | 0.12 | 1.35  | 0.5382 | -1.71 | 0.0988 | 1.42  | 0.5931 | -1.28 | 0.6888 |
| 160764_at   | 1437468_x_at | Fbxw11        | F-box and WD-40 domain protein 11           | 1.34  | 0.31 | 1.09  | 0.1146 | 1.06  | 0.4094 | 1.15  | 0.0317 | -1.03 | 0.7801 |
| 160765_at   | 1417591_at   | Ptges2        | prostaglandin E synthase 2                  | 1.24  | 0.3  | 1.12  | 0.1584 | -1.04 | 0.6287 | 1.08  | 0.2261 | -1.05 | 0.7324 |
| 160767_at   | 1417696_at   | Soat1         | sterol O-acyltransferase 1                  | 1.04  | 0.92 | 1.51  | 0.1505 | 1.14  | 0.663  | 1.27  | 0.4199 | -1.34 | 0.1899 |
| 160768_at   | 1423879_at   | D030056L22    | hypothetical protein D030056L22             | 1.29  | 0.3  | -1.05 | 0.7075 | 1.07  | 0.559  | 1.04  | 0.7624 | 1.32  | 0.1832 |
| 160769_at   | 1448438_at   | Derl2         | Der1-like domain family, member 2           | -1.04 | 0.87 | -1.39 | 0.007  | -1.24 | 0.137  | -1.59 | 0.0012 | -2.83 | 0.0003 |
| 160770_at   | 1448663_s_at | Mvd           | mevalonate (diphospho) decarboxylase        | 1.12  | 0.86 | -1.87 | 0.0019 | -1.27 | 0.2481 | -2.21 | 0.0001 | -2.17 | 0.1306 |
| 160772_i_at | 1451727_at   | D11Ertd730e   | DNA segment, Chr 11, ERATO Doi 730, exp     | 1.17  | 0.4  | 1.22  | 0.0103 | 1.31  | 0.0333 | 1.21  | 0.0089 | 1.02  | 0.8516 |
| 160773_at   | 1417321_at   | Zcchc7        | zinc finger, CCHC domain containing 7       | 1.56  | 0.25 | 1.34  | 0.0037 | 1.24  | 0.1038 | 1.63  | 0.0007 | 1.58  | 0.0156 |
| 160774_at   | 1450939_at   | Entpd1        | ectonucleoside triphosphate diphosphohydr   | 1.09  | 0.85 | 1.17  | 0.6778 | -1    | 0.9967 | 1.41  | 0.4514 | 2.27  | 0.1283 |
| 160775_at   | 1448548_at   | Tulp4         | tubby like protein 4                        | 1.07  | 0.63 | -1.06 | 0.4088 | 1.15  | 0.1199 | 1.04  | 0.6098 | -1.12 | 0.5405 |
| 160776_at   | 1434133_s_at | ---           | ---                                         | 1.03  | 0.82 | -1.08 | 0.2303 | 1.02  | 0.6738 | 1.06  | 0.2945 | 1.04  | 0.6396 |
| 160777_at   | 1433460_at   | Ttc7b         | tetratricopeptide repeat domain 7B          | 1.46  | 0.35 | -1.32 | 0.0031 | -1.12 | 0.2378 | -1.56 | 0.0002 | -1.2  | 0.2793 |
| 160779_at   | 1423881_at   | D19Ert703e    | DNA segment, Chr 19, ERATO Doi 703, exp     | -1.16 | 0.18 | -1.07 | 0.1485 | -1.05 | 0.5001 | -1.12 | 0.0195 | 1.02  | 0.7592 |
| 160780_at   | 1450117_at   | Tcf3          | transcription factor 3                      | -1.51 | 0.02 | -1.06 | 0.5276 | -1.12 | 0.173  | -1.16 | 0.1137 | -1.01 | 0.9487 |
| 160782_at   | 1454964_at   | ---           | ---                                         | -1.25 | 0.3  | -1.28 | 0.0194 | -1.16 | 0.0154 | -1.33 | 0.0008 | -1.2  | 0.1417 |
| 160783_at   | 1426780_at   | D14Ert436e    | DNA segment, Chr 14, ERATO Doi 436, exp     | 1.38  | 0.15 | 1.29  | 0.039  | 1.3   | 0.006  | 1.44  | 0.0169 | 1.49  | 0.0169 |
| 160784_r_at | 1453314_x_at | 2610039C10Rik | RIKEN cDNA 2610039C10 gene                  | 1.14  | 0.31 | 1.06  | 0.6697 | 1.09  | 0.5366 | 1.17  | 0.3338 | 1.78  | 0.2188 |
| 160785_at   | 1428369_s_at | Arhgap21      | Rho GTPase activating protein 21            | -1.06 | 0.62 | 1.04  | 0.5457 | 1.21  | 0.0409 | 1.21  | 0.0021 | 1.42  | 0.0775 |
| 160787_at   | 1423656_x_at | 1500010J02Rik | RIKEN cDNA 1500010J02 gene                  | 1.2   | 0.69 | -1.01 | 0.9649 | 1.04  | 0.8455 | 1.08  | 0.7077 | 1.02  | 0.8777 |
| 160788_at   | 1416172_at   | Pes1          | pescadillo homolog 1, containing BRCT dom   | 1.27  | 0.52 | 1.06  | 0.5715 | 1.19  | 0.1125 | 1.17  | 0.0737 | 1.2   | 0.3085 |
| 160789_at   | 1423695_at   | 9530090G24Rik | RIKEN cDNA 9530090G24 gene                  | -1.61 | 0.12 | -1.23 | 0.0001 | -1.18 | 0.0907 | -1.23 | 0.0034 | -1.16 | 0.2428 |
| 160791_at   | 1424802_a_at | 3300001P08Rik | RIKEN cDNA 3300001P08 gene                  | 1.49  | 0.25 | 1.29  | 0.0662 | 1.25  | 0.1917 | 1.58  | 0.0005 | 1.46  | 0.0703 |
| 160792_at   | 1415756_a_at | Snapap        | SNAP-associated protein                     | -1.01 | 0.98 | 1.03  | 0.834  | -1.17 | 0.2531 | 1.01  | 0.944  | -1.05 | 0.8177 |
| 160793_at   | 1452844_at   | Pou6f1        | POU domain, class 6, transcription factor 1 | 1.22  | 0.54 | 1.33  | 0.0074 | 1.38  | 0.0651 | 1.36  | 0.0126 | 1.57  | 0.1269 |
| 160794_at   | 1424760_a_at | Smyd2         | SET and MYND domain containing 2            | -2.23 | 0.34 | -1.46 | 0.3396 | 1.27  | 0.442  | -2.15 | 0.0654 | -1.32 | 0.3927 |
| 160795_at   | 1426775_s_at | Scamp1        | secretory carrier membrane protein 1        | 1.15  | 0.6  | 1.58  | 0.0008 | 1.8   | 0.0019 | 2.06  | 0      | 1.27  | 0.2974 |
| 160797_r_at | 1433718_a_at | E430007M08Rik | RIKEN cDNA E430007M08 gene                  | 3.78  | 0.02 | 1.19  | 0.4999 | -1.35 | 0.4119 | -1.09 | 0.8128 | -1.03 | 0.8677 |
| 160798_at   | 1417098_s_at | Nrbf1         | nuclear receptor binding factor 1           | 1.31  | 0.07 | -1.01 | 0.8131 | -1    | 0.9669 | -1.01 | 0.868  | -1.23 | 0.0793 |
| 160799_at   | 1455869_at   | Camk2b        | Calcium/calmodulin-dependent protein kinas  | 3.71  | 0.35 | 1.4   | 0.2607 | 1.07  | 0.8198 | 2.11  | 0.0012 | 1.27  | 0.4969 |
| 160800_at   | 1415712_at   | Zranb1        | zinc finger, RAN-binding domain containing  | -1.24 | 0.21 | 1.04  | 0.7562 | -1.06 | 0.7087 | 1.02  | 0.907  | 1.47  | 0.07   |
| 160801_at   | 1430125_s_at | Pqlc1         | PQ loop repeat containing 1                 | -1.31 | 0.15 | -1.04 | 0.4535 | -1.04 | 0.5614 | -1.21 | 0.0001 | -1.18 | 0.1814 |
| 160802_at   | 1423703_at   | Ppan          | peter pan homolog (Drosophila)              | 1.25  | 0.65 | -1.22 | 0.0685 | 1.09  | 0.4947 | -1.08 | 0.5778 | -1.52 | 0.2777 |
| 160805_s_at | 1416104_at   | Mpdu1         | mannose-P-dolichol utilization defect 1     | 1.25  | 0.36 | -1.07 | 0.2085 | -1.21 | 0.0766 | -1.07 | 0.2511 | -1.04 | 0.7359 |
| 160807_at   | 1450504_a_at | Arpat3        | 1-acylglycerol-3-phosphate O-acyltransferas | 1.29  | 0.16 | 1     | 0.9417 | 1.12  | 0.1027 | 1.07  | 0.4565 | -1.12 | 0.3467 |
| 160808_at   | 1424119_at   | Prkab1        | protein kinase, AMP-activated, beta 1 non-c | 1.36  | 0.25 | 1.06  | 0.2294 | 1.01  | 0.8973 | -1.03 | 0.3744 | 1.17  | 0.3466 |
| 160809_at   | 1423047_at   | Tollip        | toll interacting protein                    | 1.2   | 0.41 | -1.04 | 0.5873 | 1.09  | 0.1785 | -1.06 | 0.428  | -1.16 | 0.2969 |

|             |              |               |                                                  |       |      |       |        |       |        |       |        |       |        |
|-------------|--------------|---------------|--------------------------------------------------|-------|------|-------|--------|-------|--------|-------|--------|-------|--------|
| 160811_at   | 1433554_at   | AU022870      | expressed sequence AU022870                      | 2.01  | 0.04 | 1.21  | 0.0607 | 1.05  | 0.6745 | 1.33  | 0.011  | -1.38 | 0.051  |
| 160812_at   | 1428141_at   | Gga2          | golgi associated, gamma adaptin ear contain      | -1.05 | 0.9  | -1.51 | 0.0053 | -1.21 | 0.0586 | -1.62 | 0.0012 | 1.1   | 0.7779 |
| 160814_at   | 1424052_at   | Thap4         | THAP domain containing 4                         | 1.24  | 0.28 | 1.08  | 0.3334 | 1.05  | 0.3846 | 1.15  | 0.0056 | 1.75  | 0.0008 |
| 160815_at   | 1456014_s_at | BC032204      | cDNA sequence BC032204                           | 1.52  | 0.05 | 1.15  | 0.4549 | -1.1  | 0.3647 | 1.29  | 0.2986 | 1.08  | 0.7375 |
| 160816_at   | 1450728_at   | Fjx1          | four jointed box 1 (Drosophila)                  | 1.49  | 0.05 | 1.07  | 0.582  | 1.64  | 0.1859 | 1.24  | 0.1206 | 1.18  | 0.5825 |
| 160817_at   | 1451546_s_at | Tmem40        | transmembrane protein 40                         | 1.64  | 0.15 | 1.45  | 0.0552 | 1.16  | 0.2743 | 1.26  | 0.0844 | -1.1  | 0.8491 |
| 160818_at   | 1436510_a_at | Lrrfp2        | leucine rich repeat (in FLII) interacting protei | 1.06  | 0.68 | 1.85  | 0.0011 | 1.84  | 0.0003 | 1.64  | 0.0024 | 1.31  | 0.5301 |
| 160819_at   | 1436188_a_at | ---           | ---                                              | -1.41 | 0.21 | 1.01  | 0.9663 | 1.35  | 0.3876 | -1.58 | 0.1694 | 1.16  | 0.6759 |
| 160820_at   | 1460675_at   | Igsf8         | immunoglobulin superfamily, member 8             | -1.13 | 0.68 | -1.09 | 0.2899 | 1.04  | 0.612  | 1.08  | 0.3023 | 1.37  | 0.0114 |
| 160821_r_at | 1424346_at   | Ppp6c         | protein phosphatase 6, catalytic subunit         | 1.37  | 0.23 | 1.03  | 0.9059 | 1.08  | 0.6196 | 1.07  | 0.7198 | 1.25  | 0.2941 |
| 160822_at   | 1428443_a_at | Rap1ga1       | Rap1, GTPase-activating protein 1                | 1.25  | 0.56 | 1.02  | 0.8609 | -1.01 | 0.8918 | 1.07  | 0.5282 | 1.36  | 0.1525 |
| 160823_at   | 1450899_at   | Nedd1         | neural precursor cell expressed, developme       | 1.09  | 0.68 | -1.06 | 0.4065 | 1.05  | 0.6742 | 1.06  | 0.2274 | -1.03 | 0.7913 |
| 160824_at   | 1428657_at   | 1110037N09Rik | RIKEN cDNA 1110037N09 gene                       | 1.73  | 0.18 | -1.03 | 0.7686 | -1.01 | 0.9405 | -1.12 | 0.2768 | 1.07  | 0.6266 |
| 160825_at   | 1433550_at   | Chfr          | checkpoint with forkhead and ring finger dom     | 1.1   | 0.74 | 1.06  | 0.2401 | 1.09  | 0.1239 | 1.04  | 0.417  | -1.54 | 0.1788 |
| 160826_at   | 1416412_at   | Nsmaf         | neutral sphingomyelinase (N-SMase) activat       | 1.32  | 0.41 | 1.36  | 0.0202 | 1.28  | 0.0615 | 1.43  | 0.0013 | 2.53  | 0.0276 |
| 160828_at   | 1426858_at   | Inhbb         | inhibin beta-B                                   | 2.27  | 0.38 | 1.21  | 0.0909 | 1.1   | 0.3943 | 1.16  | 0.2194 | 1.19  | 0.55   |
| 160829_at   | 1418835_at   | Phlda1        | pleckstrin homology-like domain, family A, nr    | -1.91 | 0.28 | -2.66 | 0      | -2.34 | 0.0001 | -3.67 | 0      | -4.07 | 0.0448 |
| 160830_at   | 1417524_at   | Cnih2         | cornichon homolog 2 (Drosophila)                 | 1.33  | 0.54 | 1.06  | 0.6214 | 1.18  | 0.1076 | 1.09  | 0.3136 | 1.15  | 0.4036 |
| 160831_at   | 1448836_s_at | Al838661      | expressed sequence Al838661                      | 2.2   | 0    | 1.05  | 0.6882 | 1.12  | 0.2638 | 1.08  | 0.4913 | 1.97  | 0.0774 |
| 160832_at   | 1421821_at   | Ldlr          | Low density lipoprotein receptor                 | 1.08  | 0.13 | -1.05 | 0.4001 | -1.08 | 0.3748 | -1.13 | 0.1548 | -1.83 | 0.0006 |
| 160833_at   | 1417165_at   | Mbd2          | methyl-CpG binding domain protein 2              | 1.1   | 0.49 | 1.12  | 0.1281 | 1.19  | 0.3851 | 1.22  | 0.0453 | -1.01 | 0.9547 |
| 160834_at   | 1417406_at   | Sertad1       | SERTA domain containing 1                        | 1.93  | 0.08 | 1.14  | 0.4209 | 1.19  | 0.4035 | 1.17  | 0.3178 | -1.41 | 0.5366 |
| 160835_i_at | 1431359_a_at | 1110007C09Rik | RIKEN cDNA 1110007C09 gene                       | 1.72  | 0.24 | 1.14  | 0.3986 | 1.29  | 0.1658 | 1.22  | 0.1728 | 1.49  | 0.447  |
| 160836_at   | 1420824_at   | Sema4d        | sema domain, immunoglobulin domain (Ig),         | -1.03 | 0.94 | 1.61  | 0.3183 | -1.35 | 0.203  | 2     | 0.218  | 2.23  | 0.0225 |
| 160839_at   | 1416639_at   | Slc2a5        | solute carrier family 2 (facilitated glucose tra | -1.04 | 0.86 | 1.86  | 0.1138 | -1.23 | 0.6589 | 1.67  | 0.26   | -1.18 | 0.726  |
| 160840_at   | 1424250_a_at | Arhgef3       | Rho guanine nucleotide exchange factor (GI       | -1.01 | 0.99 | 1.49  | 0.0086 | 1.26  | 0.3664 | 1.56  | 0.0182 | 1.26  | 0.5833 |
| 160841_at   | 1438211_s_at | Dbp           | D site albumin promoter binding protein          | 8.19  | 0.03 | 1.55  | 0.0059 | 1.59  | 0.0013 | 1.59  | 0.0199 | 1.27  | 0.4362 |
| 160842_at   | 1427317_at   | Kin           | antigenic determinant of rec-A protein           | 8.49  | 0.02 | 1.37  | 0.0136 | 1.32  | 0.1642 | 1.29  | 0.2348 | 1.49  | 0.2008 |
| 160843_at   | 1460164_at   | Spin          | spindlin                                         | 2.23  | 0.1  | -1.32 | 0.2151 | -1.39 | 0.1437 | -1.58 | 0.0301 | -2.66 | 0.0566 |
| 160844_at   | 1450660_at   | Pts           | 6-pyruvoyl-tetrahydropterin synthase             | 1.54  | 0.08 | 1.08  | 0.264  | -1.06 | 0.5244 | -1.07 | 0.3167 | -1.13 | 0.2599 |
| 160845_at   | 1424971_at   | 2600001J17Rik | RIKEN cDNA 2600001J17 gene                       | -2.58 | 0.28 | -1.15 | 0.3267 | -1.04 | 0.6071 | -1.01 | 0.944  | -1.2  | 0.7135 |
| 160846_at   | 1423596_at   | Nek6          | NIMA (never in mitosis gene a)-related expr      | 1.02  | 0.92 | -1.13 | 0.1121 | -1.1  | 0.0954 | -1.15 | 0.0275 | -1.44 | 0.0283 |
| 160847_at   | 1425562_s_at | Trmt1         | tRNA nucleotidyl transferase, CCA-adding, 1      | 1.09  | 0.67 | -1.07 | 0.5106 | 1     | 0.9948 | 1.01  | 0.9206 | -1    | 0.9807 |
| 160848_at   | 1448875_at   | Zhx1          | zinc fingers and homeoboxes protein 1            | 1.07  | 0.83 | 1.01  | 0.866  | 1.12  | 0.2288 | -1.05 | 0.3071 | -1.08 | 0.5449 |
| 160849_at   | 1415691_at   | Dlgh1         | discs, large homolog 1 (Drosophila)              | -1.11 | 0.34 | 1.23  | 0.0429 | 1.15  | 0.1555 | 1.13  | 0.0712 | 1.61  | 0.0002 |
| 160850_at   | 1460673_at   | Fpgs          | folylpolyglutamyl synthetase                     | -1.27 | 0.43 | -1.26 | 0.0002 | -1.58 | 0.0002 | -1.3  | 0.0002 | -1.89 | 0.0376 |
| 160851_r_at | 1449218_at   | Cox8b         | cytochrome c oxidase, subunit VIIIb              | -1.01 | 0.97 | -1.07 | 0.5265 | -1.14 | 0.2286 | 1.03  | 0.7107 | 1.09  | 0.6233 |
| 160853_at   | 1434587_x_at | Ptdss2        | phosphatidylserine synthase 2                    | 1.93  | 0.02 | -1.05 | 0.7916 | 1.13  | 0.3582 | 1.21  | 0.1712 | 1.08  | 0.856  |
| 160855_at   | 1434345_at   | Al649392      | expressed sequence Al649392                      | -2.89 | 0.24 | 1.4   | 0.3485 | 1.43  | 0.3627 | 1.39  | 0.2787 | 1.02  | 0.9056 |
| 160856_at   | 1424538_at   | Ubl4          | ubiquitin-like 4                                 | 1.54  | 0.06 | 1.01  | 0.8139 | 1.01  | 0.8949 | -1.07 | 0.3987 | -1.12 | 0.6172 |
| 160857_at   | 1419639_at   | ---           | ---                                              | 3.48  | 0.01 | 2.23  | 0.0502 | 2.12  | 0.0478 | 2.36  | 0.078  | 1.2   | 0.3462 |
| 160858_at   | 1427921_s_at | 2310061C15Rik | RIKEN cDNA 2310061C15 gene                       | 1.04  | 0.85 | -1.11 | 0.1976 | -1.12 | 0.2285 | -1.21 | 0.0471 | 1.6   | 0.0122 |
| 160860_at   | 1424007_at   | Gdf10         | growth differentiation factor 10                 | 1.41  | 0.29 | 1.21  | 0.2268 | 1.06  | 0.8127 | 1.12  | 0.3818 | 3.51  | 0.0122 |
| 160861_s_at | 1449298_a_at | Pde1a         | phosphodiesterase 1A, calmodulin-depende         | -1.72 | 0.21 | -1.12 | 0.4393 | -1.36 | 0.0268 | -1.17 | 0.1229 | 1.41  | 0.3796 |
| 160862_at   | 1418181_at   | Ptp4a3        | protein tyrosine phosphatase 4a3                 | 2.01  | 0.31 | 1.02  | 0.9213 | 1.11  | 0.6024 | 1.09  | 0.5034 | 1.3   | 0.63   |
| 160863_at   | 1417276_at   | Tulp2         | tubby-like protein 2                             | -2.57 | 0.14 | -1.05 | 0.7697 | -1.41 | 0.0392 | -1.33 | 0.1726 | -1.21 | 0.2872 |
| 160864_at   | 1425601_a_at | Rtkn          | rhotekin                                         | 1.19  | 0.47 | -1.08 | 0.4462 | -1.08 | 0.4206 | -1.04 | 0.6695 | 1.15  | 0.6719 |
| 160865_at   | 1451156_s_at | Vldlr         | very low density lipoprotein receptor            | -1.65 | 0.21 | 1.26  | 0.0759 | -1.2  | 0.2459 | 1.17  | 0.2615 | 1.69  | 0.0327 |
| 160867_at   | 1417148_at   | Pdgfrb        | platelet derived growth factor receptor, beta    | -1.44 | 0.1  | 1.11  | 0.41   | -1.1  | 0.5725 | 1.33  | 0.0475 | -2.29 | 0.1045 |
| 160868_at   | 1422583_at   | Rab3b         | RAB3B, member RAS oncogene family                | 1.19  | 0.35 | -1.05 | 0.6924 | 1.01  | 0.8972 | 1.11  | 0.2277 | 1.27  | 0.2695 |
| 160869_at   | 1417892_a_at | Sirt3         | sirtuin 3 (silent mating type information regul  | 1.84  | 0.04 | 1.19  | 0.2044 | 1.2   | 0.0711 | 1.29  | 0.0457 | 1.35  | 0.0135 |
| 160870_at   | 1436929_x_at | Adcy3         | adenylate cyclase 3                              | 1.35  | 0.67 | 1.22  | 0.1645 | 1.21  | 0.2332 | 1.15  | 0.3855 | 1.57  | 0.0609 |
| 160871_at   | 1451762_a_at | Kif1b         | kinesin family member 1B                         | 1.82  | 0.28 | 1.19  | 0.3195 | 1.33  | 0.1418 | 1.15  | 0.4496 | 1.05  | 0.8072 |

|             |              |               |                                                          |       |      |       |        |       |        |       |        |       |        |
|-------------|--------------|---------------|----------------------------------------------------------|-------|------|-------|--------|-------|--------|-------|--------|-------|--------|
| 160876_at   | 1417077_at   | Bcap29        | B-cell receptor-associated protein 29                    | 1.61  | 0.06 | -1    | 0.961  | -1.07 | 0.668  | 1.13  | 0.189  | -1.07 | 0.6687 |
| 160877_at   | 1419663_at   | Ogn           | osteoglycin                                              | -1.12 | 0.86 | -1.31 | 0.6131 | -1.27 | 0.63   | -1.02 | 0.9709 | 2.05  | 0.2253 |
| 160878_at   | 1423264_at   | Bop1          | block of proliferation 1                                 | -1.11 | 0.74 | 1.02  | 0.8038 | -1.01 | 0.9607 | -1.02 | 0.7807 | -2.03 | 0.032  |
| 160880_at   | 1425975_a_at | Mapk8ip3      | mitogen-activated protein kinase 8 interactin            | -1.06 | 0.8  | 1.31  | 0.0176 | 1.25  | 0.0837 | 1.33  | 0.0017 | 1.39  | 0.0363 |
| 160881_at   | 1456565_s_at | Map3k12       | mitogen activated protein kinase kinase kinase           | -1.16 | 0.71 | 1.45  | 0.1926 | 1.01  | 0.9613 | 1.15  | 0.5779 | 1.15  | 0.7013 |
| 160884_at   | 1429574_at   | Clic3         | chloride intracellular channel 3                         | 1.16  | 0.45 | -1.53 | 0.0745 | -1.4  | 0.144  | -1.56 | 0.0856 | 1.34  | 0.31   |
| 160885_at   | 1433519_at   | 8430423A01Rik | RIKEN cDNA 8430423A01 gene                               | -1.16 | 0.62 | 1.17  | 0.0015 | 1.07  | 0.269  | 1.23  | 0.0022 | 1.14  | 0.1184 |
| 160887_at   | 1418102_at   | Hes1          | hairy and enhancer of split 1 (Drosophila)               | -1.07 | 0.79 | -1.08 | 0.304  | -1.13 | 0.1362 | -1.21 | 0.0177 | -1.01 | 0.923  |
| 160888_at   | 1416216_at   | Reps1         | RalBP1 associated Eps domain containing protein          | 1.64  | 0.23 | 1.19  | 0.0464 | 1.26  | 0.0377 | 1.23  | 0.0261 | 2.07  | 0.1578 |
| 160889_at   | 1451133_s_at | 8430437G11Rik | RIKEN cDNA 8430437G11 gene                               | 1.21  | 0.34 | 1.21  | 0.0421 | 1.19  | 0.0681 | 1.21  | 0.0199 | 1.34  | 0.2976 |
| 160890_at   | 1415829_at   | Lbr           | lamin B receptor                                         | 1.04  | 0.81 | 1.02  | 0.7741 | 1.1   | 0.2553 | 1.09  | 0.1456 | 1.28  | 0.0728 |
| 160891_at   | 1437028_at   | Sftpb         | surfactant associated protein B                          | -1.55 | 0.24 | 1.48  | 0.1108 | 1.23  | 0.2076 | 1.14  | 0.4443 | 1.18  | 0.2871 |
| 160892_at   | 1416918_at   | Dlgh3         | discs, large homolog 3 (Drosophila)                      | 1.32  | 0.44 | 1.31  | 0.3877 | -1.12 | 0.6921 | 1.59  | 0.183  | -2.32 | 0.2605 |
| 160894_at   | 1423233_at   | Cebpd         | CCAAT/enhancer binding protein (C/EBP), delta            | 1.88  | 0.13 | -1.11 | 0.4731 | 1.14  | 0.4825 | 1.49  | 0.0074 | 1.38  | 0.1485 |
| 160896_at   | 1417090_at   | Rcn1          | reticulocalbin 1                                         | 2.54  | 0.05 | 1.12  | 0.2532 | 1.23  | 0.1283 | 1.02  | 0.8665 | -1.15 | 0.4895 |
| 160897_at   | 1451359_at   | BC005662      | cDNA sequence BC005662                                   | 1.86  | 0.08 | 1.25  | 0.0915 | 1.13  | 0.3686 | 1.3   | 0.0223 | 1.21  | 0.6857 |
| 160898_at   | 1424751_at   | Abt1          | activator of basal transcription                         | 1.4   | 0.02 | 1.06  | 0.654  | 1.33  | 0.0711 | 1.31  | 0.0419 | 1.2   | 0.4183 |
| 160899_at   | 1460214_at   | Pcp4          | Purkinje cell protein 4                                  | 1.09  | 0.84 | 1.3   | 0.3455 | 1.02  | 0.9157 | -1.14 | 0.365  | 1.21  | 0.3495 |
| 160900_at   | 1417594_at   | Gkap1         | G kinase anchoring protein 1                             | 4.14  | 0.02 | 1.09  | 0.2928 | 1.32  | 0.0434 | 1.2   | 0.0978 | 2.5   | 0.0607 |
| 160901_at   | 1423100_at   | Fos           | FBJ osteosarcoma oncogene                                | 3.34  | 0.15 | 2.15  | 0.0862 | -1.29 | 0.1386 | 1.28  | 0.3636 | -1.09 | 0.7888 |
| 160902_at   | 1417412_at   | F8a           | factor 8-associated gene A                               | 1.21  | 0.59 | -1.13 | 0.6217 | -1.28 | 0.3055 | -1.42 | 0.141  | -1.25 | 0.2222 |
| 160903_at   | 1426719_at   | Apb2          | amyloid beta (A4) precursor protein-binding, type 2      | -1.83 | 0.43 | -1.03 | 0.7733 | -1.14 | 0.3669 | -1.05 | 0.7752 | 1.12  | 0.4183 |
| 160904_at   | 1417147_at   | B230317C12Rik | RIKEN cDNA B230317C12 gene                               | 1.11  | 0.72 | 1.05  | 0.5288 | -1.19 | 0.0883 | -1.1  | 0.3937 | 1.32  | 0.256  |
| 160905_s_at | 1418100_at   | A030009H04Rik | RIKEN cDNA A030009H04 gene                               | 3.75  | 0.01 | 1.84  | 0.05   | 3.02  | 0.0561 | 2.38  | 0.0228 | -1.32 | 0.329  |
| 160907_at   | 1454622_at   | Slc38a5       | solute carrier family 38, member 5                       | -1.17 | 0.73 | -1.18 | 0.2583 | -1.05 | 0.7273 | -1.1  | 0.3766 | 1.15  | 0.3978 |
| 160908_r_at | 1423672_at   | 2510042P03Rik | RIKEN cDNA 2510042P03 gene                               | -1.33 | 0.22 | -1.22 | 0.0176 | -1.15 | 0.3585 | -1.21 | 0.0075 | -1.26 | 0.3371 |
| 160909_at   | 1449133_at   | Sprr1a        | small proline-rich protein 1A                            | 1.27  | 0.63 | -1.27 | 0.2003 | 1.03  | 0.858  | 1.16  | 0.1269 | 1.06  | 0.8424 |
| 160910_at   | 1419634_a_at | Ghrh          | growth hormone releasing hormone                         | 1.33  | 0.5  | -1.38 | 0.3417 | -1.24 | 0.5337 | -1.59 | 0.1593 | -1.08 | 0.8414 |
| 160911_at   | 1421884_at   | Sos1          | Son of sevenless homolog 1 (Drosophila)                  | -1    | 0.99 | -1.06 | 0.6706 | 1.09  | 0.4861 | -1.11 | 0.2772 | 1.15  | 0.5622 |
| 160913_at   | 1421253_at   | Nrap          | nebulin-related anchoring protein                        | 1.2   | 0.77 | -1.36 | 0.0584 | -1.18 | 0.1694 | -1.37 | 0.05   | 1.37  | 0.4018 |
| 160914_at   | 1449191_at   | Wfdc12        | WAP four-disulfide core domain 12                        | -1.05 | 0.64 | 1.01  | 0.9224 | -1.01 | 0.9291 | -1.03 | 0.6569 | 1.02  | 0.9465 |
| 160915_at   | 1449435_at   | B4galt3       | UDP-Gal:betaGlcNAc beta 1,4-galactosyltransferase 3      | -1.35 | 0.19 | 1     | 0.9033 | 1     | 0.9615 | -1.05 | 0.1909 | 1.4   | 0.0276 |
| 160916_at   | 1417877_at   | 2310005P05Rik | RIKEN cDNA 2310005P05 gene                               | 6.03  | 0.02 | 1.56  | 0.0281 | 1.27  | 0.2083 | 1.5   | 0.0345 | -1.89 | 0.0431 |
| 160917_r_at | 1422498_at   | Mageh1        | melanoma antigen, family H, 1                            | 1.6   | 0.4  | 1.3   | 0.4471 | 1.44  | 0.2706 | 1.12  | 0.6754 | -1.02 | 0.9801 |
| 160918_at   | 1448964_at   | S100g         | S100 calcium binding protein G                           | 4.39  | 0.18 | 1.07  | 0.8184 | 1.91  | 0.3764 | 1.77  | 0.0019 | 1.95  | 0.141  |
| 160920_at   | 1423572_at   | Bcl2l2        | Bcl2-like 2                                              | -1.04 | 0.88 | 1.02  | 0.7385 | -1.01 | 0.938  | -1    | 0.9969 | 1.52  | 0.0531 |
| 160921_at   | 1416617_at   | Acas2l        | acetyl-Coenzyme A synthetase 2 (AMP form)                | 2.12  | 0.02 | -1.35 | 0.2423 | -1.15 | 0.6304 | 1.09  | 0.5669 | 1.75  | 0.1684 |
| 160923_at   | 1424600_at   | Abp1          | amiloride binding protein 1 (amine oxidase, cytoplasmic) | -1.72 | 0.03 | 1.01  | 0.9378 | 1.01  | 0.8873 | -1.12 | 0.102  | 1.03  | 0.9025 |
| 160924_at   | 1436896_at   | D14Erd231e    | DNA segment, Chr 14, ERATO Doi 231, expressed            | 3.28  | 0.12 | 1.49  | 0.0829 | 1.29  | 0.039  | 1.32  | 0.01   | 1.14  | 0.8199 |
| 160925_at   | 1422687_at   | ---           | ---                                                      | 1.1   | 0.52 | -1.04 | 0.584  | -1.13 | 0.2326 | 1     | 0.977  | 1.14  | 0.5656 |
| 160927_at   | 1427034_at   | Ace           | angiotensin converting enzyme                            | -1.62 | 0.11 | 1.67  | 0.0754 | 1.68  | 0.143  | 2.03  | 0.0029 | 1.64  | 0.2922 |
| 160928_at   | 1448040_at   | Tfpt          | TCF3 (E2A) fusion partner                                | -1.58 | 0.23 | -1.06 | 0.8043 | 1.18  | 0.4914 | 1.02  | 0.9371 | 2.05  | 0.0823 |
| 160929_at   | 1423099_a_at | Mettl3        | methyltransferase-like 3                                 | -1.21 | 0.32 | 1.54  | 0.0964 | 1.39  | 0.3271 | 1.23  | 0.5711 | 1.73  | 0.2751 |
| 160930_at   | 1416500_at   | Sacm1l        | SAC1 (suppressor of actin mutations 1, homolog 1)        | 1.09  | 0.7  | 1.14  | 0.2088 | -1.01 | 0.9091 | 1.02  | 0.8097 | -1.41 | 0.0115 |
| 160931_at   | 1428086_at   | Dnm1l         | dynamitin 1-like                                         | 1.28  | 0.24 | 1.14  | 0.0386 | 1.08  | 0.4807 | 1.22  | 0.0005 | -1.01 | 0.9579 |
| 160933_at   | 1417141_at   | Igtp          | interferon gamma induced GTPase                          | -1.26 | 0.2  | 1.52  | 0.4916 | -2.6  | 0.0194 | 1.28  | 0.6498 | -1.75 | 0.1624 |
| 160937_at   | 1416776_at   | Crym          | crystallin, mu                                           | 1.86  | 0.08 | 1.71  | 0.0154 | 2.07  | 0.0119 | 2.06  | 0.0511 | 3.03  | 0.2249 |
| 160938_at   | 1417324_at   | Mast2         | microtubule associated serine/threonine kinase 2         | 2.55  | 0.05 | 2.09  | 0.0432 | 1.39  | 0.39   | 2.75  | 0.0013 | 1.2   | 0.5599 |
| 160939_at   | 1448925_at   | Twist2        | twist homolog 2 (Drosophila)                             | -2.86 | 0.32 | 1.65  | 0.0535 | 1.13  | 0.6375 | 1.58  | 0.3172 | 1.26  | 0.4665 |
| 160941_at   | 1418406_at   | Pde8a         | phosphodiesterase 8A                                     | -1.07 | 0.61 | 1.02  | 0.8434 | 1.22  | 0.0783 | -1.04 | 0.5279 | 1.35  | 0.1032 |
| 160943_at   | 1460229_at   | Stag3         | stromal antigen 3                                        | -1.07 | 0.79 | -1.08 | 0.4698 | -1.2  | 0.1128 | -1.06 | 0.5614 | 1.28  | 0.548  |
| 160944_at   | 1418831_at   | Pkp3          | plakophilin 3                                            | -1.36 | 0.38 | 1.26  | 0.0198 | 1.26  | 0.1407 | 1.22  | 0.0137 | -1.02 | 0.9184 |
| 160945_at   | 1437786_at   | C80008        | expressed sequence C80008                                | -1.96 | 0.15 | -1.23 | 0.649  | -1.73 | 0.1794 | -1.82 | 0.1363 | 1.43  | 0.5691 |

|             |              |                  |                                                 |       |      |       |        |       |        |       |        |        |        |
|-------------|--------------|------------------|-------------------------------------------------|-------|------|-------|--------|-------|--------|-------|--------|--------|--------|
| 160946_at   | 1425805_a_at | Usp12            | ubiquitin specific protease 12                  | 1.19  | 0.79 | -1.01 | 0.9738 | -1.45 | 0.216  | -1.07 | 0.8395 | 1.12   | 0.769  |
| 160947_at   | 1451282_at   | Centd3           | centaurin, delta 3                              | 1.05  | 0.63 | 1.11  | 0.3368 | 1.11  | 0.0684 | 1.04  | 0.6761 | 1.12   | 0.295  |
| 160948_at   | 1420743_a_at | Ppp3cc           | protein phosphatase 3, catalytic subunit, gar   | 2.4   | 0.02 | -1.02 | 0.9401 | -1.23 | 0.3668 | 1.37  | 0.0433 | -1.96  | 0.1095 |
| 160949_at   | 1448725_at   | Parg             | poly (ADP-ribose) glycohydrolase                | 1.02  | 0.92 | -1.01 | 0.9139 | -1.34 | 0.1193 | -1.22 | 0.2424 | -1.37  | 0.0738 |
| 160951_at   | 1421092_at   | Serpina12        | serine (or cysteine) proteinase inhibitor, clac | -4.17 | 0.22 | -1.14 | 0.4631 | -1.08 | 0.6225 | 1.3   | 0.3151 | -61.54 | 0.0001 |
| 160952_r_at | 1420660_at   | Lrrc6            | leucine rich repeat containing 6 (testis)       | -1.99 | 0.24 | 1.62  | 0.13   | 1.95  | 0.0488 | -1.03 | 0.9486 | 2.58   | 0.0237 |
| 160955_at   | 1417075_at   | 2010309E21Rik    | RIKEN cDNA 2010309E21 gene                      | 1.47  | 0.15 | -1.12 | 0.0758 | -1.12 | 0.2237 | -1.34 | 0.0017 | -1.01  | 0.9339 |
| 160957_at   | 1460571_at   | Dicer1           | Dicer1, Dcr-1 homolog (Drosophila)              | 1.9   | 0.08 | -1.01 | 0.9732 | 1.38  | 0.2439 | 1.22  | 0.2754 | -1.23  | 0.7205 |
| 160958_at   | 1424075_at   | 9430016H08Rik    | RIKEN cDNA 9430016H08 gene                      | 1.68  | 0.06 | 1.32  | 0.0045 | 1.27  | 0.1591 | 1.29  | 0.0214 | -1.65  | 0.0953 |
| 160961_at   | 1434261_at   | Sipa1l2          | signal-induced proliferation-associated 1 like  | 2.27  | 0.05 | 1.14  | 0.2809 | 1.66  | 0      | 1.37  | 0.0075 | 1.08   | 0.7681 |
| 160964_at   | 1452234_s_at | D16Bwg1494e      | DNA segment, Chr 16, Brigham & Women's          | -1.36 | 0.23 | -1.04 | 0.3738 | -1.07 | 0.0731 | -1.08 | 0.1484 | 1.22   | 0.2148 |
| 160966_at   | 1457285_at   | Zfp187           | zinc finger protein 187                         | 1.52  | 0.31 | 1.39  | 0.0219 | 1.36  | 0.0195 | 1.64  | 0.0001 | 1.53   | 0.0476 |
| 160968_at   | 1434528_at   | Aard             | alanine and arginine rich domain containing     | 1.29  | 0.36 | -1.18 | 0.4529 | 1.16  | 0.2848 | -1.15 | 0.4492 | 1.09   | 0.843  |
| 160969_at   | 1451752_at   | Foxk1            | forkhead box K1                                 | 1.87  | 0.04 | 1.05  | 0.7573 | 1.19  | 0.2996 | 1.16  | 0.348  | -1.18  | 0.7297 |
| 160971_at   | 1436528_at   | Kazald1          | Kazal-type serine protease inhibitor domain     | -1.26 | 0.18 | -1.29 | 0.0118 | -1.18 | 0.1256 | 1.04  | 0.7824 | 1.09   | 0.7535 |
| 160972_at   | 1418423_s_at | Serpnb9f /// Ser | serine (or cysteine) proteinase inhibitor, clac | -2.74 | 0.05 | 1.39  | 0.305  | 1.45  | 0.2886 | -1.23 | 0.5378 | -1.14  | 0.6457 |
| 160973_at   | 1449699_s_at | C330027C09Rik    | RIKEN cDNA C330027C09 gene                      | -1.26 | 0.56 | 1.23  | 0.4764 | -1.16 | 0.5607 | 1.3   | 0.3175 | 1.73   | 0.3176 |
| 160975_at   | 1435504_at   | Rsnl2            | Restin-like 2                                   | -4.82 | 0.41 | -2.25 | 0.079  | -1.18 | 0.7322 | -2.11 | 0.0959 | -1.1   | 0.8947 |
| 160976_at   | 1454979_at   | Diap1            | diaphanous homolog 1 (Drosophila)               | -1.01 | 0.92 | 1.14  | 0.0443 | 1.11  | 0.1766 | -1    | 0.9515 | -1.21  | 0.3459 |
| 160977_at   | 1452304_a_at | Arhgef5          | Rho guanine nucleotide exchange factor (GI      | 1.59  | 0.45 | -1.4  | 0.2077 | 1.16  | 0.4572 | 1.13  | 0.5198 | -1.51  | 0.3497 |
| 160978_at   | 1451481_s_at | D630035O19Rik    | RIKEN cDNA D630035O19 gene                      | -1.14 | 0.64 | -1.08 | 0.4913 | 1.09  | 0.4151 | -1.08 | 0.4372 | -1.08  | 0.7333 |
| 160979_at   | 1434705_at   | Ctbp2            | C-terminal binding protein 2                    | 1.83  | 0.1  | 1.1   | 0.5482 | 1     | 0.9988 | 1.07  | 0.6883 | 1.42   | 0.0972 |
| 160980_at   | 1428810_at   | 2700097O09Rik    | RIKEN cDNA 2700097O09 gene                      | 2.37  | 0.04 | 1.03  | 0.7925 | -1.34 | 0.2033 | 1.2   | 0.1513 | 2.77   | 0.0431 |
| 160981_at   | 1450666_s_at | Sca10            | spinocerebellar ataxia 10 homolog (human)       | 1.05  | 0.87 | -1.19 | 0.0794 | -1.01 | 0.939  | -1.08 | 0.2728 | -1.65  | 0.0222 |
| 160982_at   | 1428762_at   | 4921526G09Rik    | RIKEN cDNA 4921526G09 gene                      | 1.37  | 0.13 | 1.07  | 0.4731 | 1.09  | 0.5596 | 1.17  | 0.1062 | 1.25   | 0.1258 |
| 160983_at   | 1457964_at   | 1810044D09Rik    | RIKEN cDNA 1810044D09 gene                      | 1.13  | 0.58 | -1.1  | 0.2542 | -1.17 | 0.0627 | -1.15 | 0.0167 | 1.36   | 0.229  |
| 160985_at   | 1453265_at   | 4930579C15Rik    | RIKEN cDNA 4930579C15 gene                      | -2.14 | 0.35 | -1.35 | 0.4599 | -1.25 | 0.5524 | -1.51 | 0.372  | 1.48   | 0.1179 |
| 160987_r_at | 1423440_at   | 1110001A07Rik    | RIKEN cDNA 1110001A07 gene                      | -2.19 | 0.36 | -1.08 | 0.8524 | 1.84  | 0.0663 | 1.03  | 0.902  | 1.68   | 0.1432 |
| 160989_r_at | 1435184_at   | B430320C24Rik    | RIKEN cDNA B430320C24 gene                      | 1.67  | 0.3  | 1.11  | 0.51   | 1.14  | 0.5147 | -1.13 | 0.3705 | 1.23   | 0.5259 |
| 160990_r_at | 1424243_at   | BC016198         | cDNA sequence BC016198                          | 1.46  | 0.27 | 1.13  | 0.4589 | 1.2   | 0.3643 | 1.32  | 0.1157 | -1.58  | 0.0777 |
| 160991_at   | 1428503_a_at | Nkiras1          | NFKB inhibitor interacting Ras-like protein 1   | 1.14  | 0.37 | -1.07 | 0.5667 | 1.17  | 0.1179 | 1.13  | 0.1448 | -1.19  | 0.0617 |
| 160992_at   | 1426928_at   | 4633402D15Rik    | RIKEN cDNA 4633402D15 gene                      | 1.6   | 0.46 | 1.03  | 0.929  | -1.23 | 0.5607 | 1.21  | 0.5746 | 1.29   | 0.5756 |
| 160993_at   | 1459894_at   | A630053O10       | Hypothetical protein A630053O10                 | 1.07  | 0.92 | -1.24 | 0.1698 | -1.77 | 0.0151 | -1.81 | 0.0088 | 1.18   | 0.3849 |
| 160994_at   | 1433756_at   | 4930429A08Rik    | RIKEN cDNA 4930429A08 gene                      | -1.14 | 0.64 | 1.04  | 0.7926 | 1.16  | 0.2847 | 1.41  | 0.0003 | 1.71   | 0.0247 |
| 160995_at   | 1434044_at   | Repin1           | replication initiator 1                         | -4    | 0    | 1.13  | 0.2637 | -1.01 | 0.9205 | 1.12  | 0.0614 | 1.48   | 0.0109 |
| 160996_at   | 1418876_at   | Foxd1            | forkhead box D1                                 | 1.24  | 0.63 | 1.02  | 0.925  | 1.38  | 0.2211 | -1.07 | 0.7926 | 1.17   | 0.6658 |
| 160997_at   | 1434981_at   | E130303B06Rik    | RIKEN cDNA E130303B06 gene                      | -1.04 | 0.86 | 1.13  | 0.1773 | 1.01  | 0.9038 | -1.12 | 0.3605 | -1.01  | 0.9628 |
| 160998_at   | 1449677_s_at | Tmem38b          | transmembrane protein 38B                       | -1.36 | 0.06 | 1.29  | 0.0074 | 1.18  | 0.0078 | 1.32  | 0.0013 | -1.06  | 0.4741 |
| 161000_i_at | 1416309_at   | Nusap1           | nucleolar and spindle associated protein 1      | 1.19  | 0.75 | 1.18  | 0.5516 | -1.03 | 0.9242 | 1.67  | 0.0854 | -1.16  | 0.4727 |
| 161001_at   | 1455180_at   | ---              | ---                                             | -2.51 | 0.18 | 1.02  | 0.847  | 1.18  | 0.3293 | -1.12 | 0.3506 | 1.18   | 0.4099 |
| 161002_at   | 1434514_at   | Rbm15            | RNA binding motif protein 15                    | 1.49  | 0.32 | 1.02  | 0.8303 | 1.08  | 0.5019 | -1.04 | 0.5737 | 1.66   | 0.025  |
| 161003_at   | 1450073_at   | Kif3b            | kinesin family member 3B                        | -1.54 | 0.12 | 1.32  | 0.0231 | 1.12  | 0.4802 | 1.19  | 0.4226 | -1.01  | 0.9817 |
| 161004_at   | 1455692_x_at | 1700097N02Rik    | RIKEN cDNA 1700097N02 gene                      | -1.56 | 0.12 | 1.11  | 0.1136 | 1.01  | 0.8999 | 1.02  | 0.7048 | 1.2    | 0.2921 |
| 161006_at   | 1434537_at   | Slco3a1          | Solute carrier organic anion transporter fami   | 1.19  | 0.57 | 1.11  | 0.6129 | -1.04 | 0.7987 | -1.14 | 0.4543 | 1.24   | 0.5104 |
| 161008_at   | 1427175_at   | Al428936         | expressed sequence Al428936                     | 1.1   | 0.45 | 1.32  | 0.0711 | -1.09 | 0.3405 | 1.08  | 0.4668 | 1.01   | 0.978  |
| 161009_at   | 1434436_at   | Zcwc2            | zinc finger, CW-type with coiled-coil domain    | 3.08  | 0.01 | -1.36 | 0.2844 | 1.38  | 0.2021 | -1.16 | 0.4749 | 2.53   | 0.1502 |
| 161010_r_at | 1434045_at   | ---              | ---                                             | -1.24 | 0.54 | 1.46  | 0.0762 | 1.12  | 0.5877 | 1.53  | 0.0094 | -1.63  | 0.268  |
| 161011_at   | 1454884_at   | Btbd4            | BTB (POZ) domain containing 4                   | -1.09 | 0.67 | 1.18  | 0.2525 | 1.22  | 0.2699 | 1.09  | 0.5647 | -1.02  | 0.9734 |
| 161012_at   | 1417640_at   | Cd79b            | CD79B antigen                                   | -1.13 | 0.6  | 1.67  | 0.0234 | 1.2   | 0.404  | 1.66  | 0.0085 | 1.91   | 0.013  |
| 161014_at   | 1426049_a_at | Terf2ip          | telomeric repeat binding factor 2, interacting  | 1.02  | 0.9  | 1.07  | 0.5095 | 1.18  | 0.0688 | 1.11  | 0.2697 | -1.01  | 0.9158 |
| 161015_at   | 1433906_at   | 4933402J24Rik    | RIKEN cDNA 4933402J24 gene                      | -1.11 | 0.79 | -1.27 | 0.4634 | -1.31 | 0.3717 | -1.39 | 0.3063 | 1.05   | 0.924  |
| 161016_at   | 1455915_at   | Galnt4           | UDP-N-acetyl-alpha-D-galactosamine:polyp        | -1.01 | 0.95 | 1     | 0.9782 | -1.03 | 0.8495 | -1.03 | 0.7847 | -1.13  | 0.4226 |
| 161018_at   | 1439962_at   | 2310010J17Rik    | RIKEN cDNA 2310010J17 gene                      | 1.36  | 0.15 | 1.36  | 0.0052 | 1.09  | 0.4507 | 1.49  | 0.0017 | 1.41   | 0.0577 |

|             |              |               |                                                |       |      |       |        |       |        |       |        |       |        |
|-------------|--------------|---------------|------------------------------------------------|-------|------|-------|--------|-------|--------|-------|--------|-------|--------|
| 161019_at   | 1435015_at   | 2210018M03Rik | RIKEN cDNA 2210018M03 gene                     | 1.4   | 0.01 | 1.05  | 0.5558 | 1.11  | 0.2403 | 1.06  | 0.3613 | -1.45 | 0.3802 |
| 161021_at   | 1417923_at   | Pak3          | p21 (CDKN1A)-activated kinase 3                | -2.27 | 0.31 | -1.47 | 0.2025 | -1.21 | 0.4783 | -1.41 | 0.266  | 3.03  | 0.0036 |
| 161023_at   | 1448681_at   | Il15ra        | interleukin 15 receptor, alpha chain           | -1.31 | 0.02 | 1.13  | 0.2867 | -1.03 | 0.7859 | 1.08  | 0.471  | 1.09  | 0.7696 |
| 161024_at   | 1434889_at   | Plekha7       | Pleckstrin homology domain containing, fam     | -1.31 | 0.41 | 1.17  | 0.2214 | 1.15  | 0.1099 | 1.01  | 0.9416 | 1.54  | 0.1119 |
| 161025_f_at | 1449135_at   | Sox18         | SRY-box containing gene 18                     | 1.13  | 0.69 | 1.1   | 0.3036 | 1.07  | 0.3263 | -1.06 | 0.5157 | 1.34  | 0.0265 |
| 161028_at   | 1450759_at   | Bmp6          | bone morphogenetic protein 6                   | 1.73  | 0.16 | 1.39  | 0.2572 | 2     | 0.0062 | 1.89  | 0.0473 | 1.45  | 0.253  |
| 161029_at   | 1426316_at   | 6330416G13Rik | RIKEN cDNA 6330416G13 gene                     | -1.68 | 0.06 | -1.01 | 0.9645 | -1.11 | 0.3119 | 1.09  | 0.6244 | 1.13  | 0.2474 |
| 161030_at   | 1428983_at   | Scx           | scleraxis                                      | 1.09  | 0.58 | 1.18  | 0.5792 | -1.23 | 0.4853 | 1.28  | 0.3482 | 2.39  | 0.0343 |
| 161031_at   | 1453175_at   | Zfp50         | zinc finger protein 50                         | -1.02 | 0.97 | -1.04 | 0.9034 | 1.3   | 0.3897 | 1.15  | 0.6075 | -2.47 | 0.2345 |
| 161032_i_at | 1419325_at   | Nmu           | neuromedin U                                   | -1.25 | 0.61 | -1.38 | 0.3093 | -1.47 | 0.2741 | -1.2  | 0.6002 | 1.52  | 0.1243 |
| 161033_at   | 1449208_at   | Pap0lb        | poly (A) polymerase beta (testis specific)     | -1.06 | 0.79 | 1.01  | 0.9887 | 1.31  | 0.4724 | -1.42 | 0.3345 | 1.36  | 0.2758 |
| 161034_at   | 1451502_at   | Pla2g10       | phospholipase A2, group X                      | -1.23 | 0.57 | -1.19 | 0.3659 | -1.29 | 0.1075 | -1.65 | 0.0083 | 1.39  | 0.095  |
| 161036_at   | 1426712_at   | Slc6a15       | solute carrier family 6 (neurotransmitter tran | -2.1  | 0.08 | -1.22 | 0.3165 | -1.49 | 0.0439 | -1.13 | 0.4359 | -1.52 | 0.3478 |
| 161038_at   | 1420637_at   | Prps2         | phosphoribosyl pyrophosphate synthetase 2      | -3.01 | 0.2  | 1.17  | 0.5424 | 1.28  | 0.3232 | 1.41  | 0.1772 | 1.79  | 0.0487 |
| 161039_at   | 1451812_at   | Adam22        | a disintegrin and metalloprotease domain 22    | -1.31 | 0.24 | -1.05 | 0.7072 | -1.21 | 0.2873 | -1.09 | 0.6329 | -1.14 | 0.5125 |
| 161040_at   | 1422985_at   | Fzd1          | frizzled homolog 1 (Drosophila)                | 3.85  | 0.02 | 1.08  | 0.4173 | -1.06 | 0.7359 | -1.09 | 0.3821 | -1.33 | 0.2282 |
| 161041_at   | 1418263_at   | Ddx25         | DEAD (Asp-Glu-Ala-Asp) box polypeptide 2f      | -1.37 | 0.28 | -1.11 | 0.4762 | 1.02  | 0.8927 | 1.06  | 0.6766 | -1.08 | 0.7772 |
| 161042_at   | 1427912_at   | Cbr3          | carbonyl reductase 3                           | 2.93  | 0.4  | -1.03 | 0.9122 | -1.14 | 0.4935 | -1.06 | 0.7883 | 1.34  | 0.1558 |
| 161044_at   | 1454985_at   | D030051N19Rik | RIKEN cDNA D030051N19 gene                     | 1.51  | 0.07 | 1.03  | 0.7383 | -1.04 | 0.6831 | 1.05  | 0.6721 | -1.04 | 0.5239 |
| 161045_at   | 1416053_at   | Lrrn1         | leucine rich repeat protein 1, neuronal        | -1.8  | 0.24 | -1.16 | 0.7088 | 1.01  | 0.9808 | -1.39 | 0.3486 | 1.01  | 0.9753 |
| 161046_at   | 1418476_at   | Crif1         | cytokine receptor-like factor 1                | 1.02  | 0.93 | 1.47  | 0.1653 | 1.63  | 0.0352 | 1.09  | 0.6353 | 1.43  | 0.2918 |
| 161049_at   | 1418357_at   | Foxg1         | forkhead box G1                                | 1.06  | 0.73 | 1.04  | 0.8606 | -1.07 | 0.7519 | -1    | 0.9875 | -1.42 | 0.5554 |
| 161050_at   | 1435981_at   | ---           | 10 days neonate cerebellum cDNA, RIKEN I       | -1.44 | 0.07 | 1.11  | 0.2587 | 1.52  | 0.0037 | -1.04 | 0.6631 | 1.26  | 0.4114 |
| 161051_at   | 1423146_at   | Hes5          | hairy and enhancer of split 5 (Drosophila)     | -1.92 | 0.33 | 1.46  | 0.1326 | 2     | 0.0446 | 1.49  | 0.1642 | 1.08  | 0.6568 |
| 161054_at   | 1419672_at   | Spock1        | sparc/osteonectin, cwcv and kazal-like dom     | -1.43 | 0.33 | -1.32 | 0.3868 | 1.22  | 0.472  | -1.32 | 0.2113 | -1.23 | 0.5178 |
| 161056_at   | 1434901_at   | ---           | Gene model 1103, (NCBI)                        | 2.12  | 0    | -1.29 | 0.3294 | 1.24  | 0.3295 | -1.1  | 0.6835 | 1.24  | 0.7078 |
| 161057_at   | 1435788_at   | 2900086B20Rik | RIKEN cDNA 2900086B20 gene                     | 1.35  | 0.65 | -1.1  | 0.6472 | -2.52 | 0.0029 | -2.25 | 0.012  | 1.35  | 0.2453 |
| 161059_at   | 1452142_at   | Slc6a1        | solute carrier family 6 (neurotransmitter tran | -3.57 | 0.07 | -1.41 | 0.3123 | -1.5  | 0.2702 | -2.31 | 0.0284 | 1.36  | 0.4168 |
| 161063_r_at | 1436616_at   | R74740        | expressed sequence R74740                      | -1.75 | 0    | 1.1   | 0.0718 | 1.04  | 0.5573 | 1.01  | 0.8642 | 1.39  | 0.1573 |
| 161065_at   | 1429035_at   | Dpep3         | dipeptidase 3                                  | -4.29 | 0.04 | 1.62  | 0.1023 | 1.9   | 0.047  | -1.03 | 0.9087 | 1.32  | 0.2298 |
| 161067_at   | 1456225_x_at | Trib3         | tribbles homolog 3 (Drosophila)                | 1.82  | 0.1  | 1.59  | 0.0098 | 1.6   | 0.0035 | 2.11  | 0.0002 | 1.73  | 0.0881 |
| 161069_at   | 1438551_at   | Neurog1       | neurogenin 1                                   | 1.4   | 0.52 | -1.09 | 0.7968 | -1.28 | 0.4493 | -1.37 | 0.3589 | 1.61  | 0.255  |
| 161070_at   | 1434403_at   | Spred2        | sprouty-related, EVH1 domain containing 2      | 1.22  | 0.62 | 1.54  | 0.0006 | 1.05  | 0.7212 | 1.64  | 0      | 1.25  | 0.2709 |
| 161072_at   | 1429388_at   | Nanog         | Nanog homeobox                                 | 1.05  | 0.89 | -1.18 | 0.567  | -1.14 | 0.646  | -1.49 | 0.2207 | 1.02  | 0.9203 |
| 161073_at   | 1427057_at   | C630002B14Rik | RIKEN cDNA C630002B14 gene                     | 2.35  | 0.06 | 1.08  | 0.5068 | 1.06  | 0.5752 | -1.02 | 0.7978 | 1.69  | 0.091  |
| 161074_at   | 1438011_at   | Pcyt1a        | phosphate cytidylyltransferase 1, choline, al  | 1.47  | 0.19 | 1.05  | 0.5822 | 1.01  | 0.8714 | 1.15  | 0.0218 | 1.03  | 0.6636 |
| 161075_at   | 1456481_at   | D9Erttd280e   | DNA segment, Chr 9, ERATO Doi 280, expr        | -2.03 | 0.02 | -1.09 | 0.5351 | -1.01 | 0.9391 | -1.26 | 0.048  | -1.31 | 0.4455 |
| 161076_at   | 1423919_at   | BC023882      | cDNA sequence BC023882                         | 1.37  | 0.22 | 1.39  | 0.0002 | 1.29  | 0.0377 | 1.25  | 0.0204 | 1.4   | 0.359  |
| 161077_f_at | 1448400_a_at | Smarcd2       | SWI/SNF related, matrix associated, actin di   | 1.03  | 0.89 | -1.3  | 0.0023 | -1.09 | 0.2222 | -1.33 | 0.0001 | -1.41 | 0.023  |
| 161078_at   | 1439625_at   | ---           | Transcribed locus                              | -2.04 | 0.08 | -1.19 | 0.3319 | -1.24 | 0.2828 | 1.05  | 0.8226 | -1.42 | 0.4064 |
| 161079_at   | 1422671_s_at | Naalad2       | N-acetylated alpha-linked acidic dipeptidase   | -1.42 | 0.39 | -1.08 | 0.8167 | 1.53  | 0.052  | -1.18 | 0.5954 | 2.4   | 0.1027 |
| 161081_at   | 1434272_at   | Cpeb2         | cytoplasmic polyadenylation element bindin     | -1.33 | 0.33 | -1.04 | 0.5583 | -1.2  | 0.231  | -1.19 | 0.0828 | -1.17 | 0.6576 |
| 161082_r_at | 1428303_at   | 1500005I02Rik | RIKEN cDNA 1500005I02 gene                     | 1.52  | 0.31 | -1.26 | 0.2149 | -1.18 | 0.4772 | -1.28 | 0.3443 | 1.79  | 0.0369 |
| 161083_at   | 1455733_at   | A130052D22    | RIKEN cDNA A430105I05 gene                     | -1.01 | 0.99 | -1.02 | 0.8657 | -1.06 | 0.6917 | -1.03 | 0.8479 | 1.22  | 0.1568 |
| 161084_at   | 1427104_at   | Zfp612        | zinc finger protein 612                        | 1.31  | 0.54 | 1.24  | 0.1629 | 1.08  | 0.4878 | 1.34  | 0.0436 | 2.18  | 0.0839 |
| 161086_at   | 1418898_at   | Lin7c         | lin 7 homolog c (C. elegans)                   | -1.06 | 0.9  | 1.04  | 0.7858 | 1.02  | 0.9348 | 1.09  | 0.6003 | 1.12  | 0.7716 |
| 161092_at   | 1434859_at   | Umps          | uridine monophosphate synthetase               | -1.47 | 0.04 | -1.04 | 0.5449 | 1     | 0.9577 | -1.18 | 0.018  | 1.12  | 0.1177 |
| 161097_at   | 1460480_at   | 1600014E20Rik | RIKEN cDNA 1600014E20 gene                     | -1.37 | 0.53 | 1.39  | 0.164  | 1.44  | 0.038  | -1.18 | 0.4597 | 1.05  | 0.9272 |
| 161099_at   | 1457094_at   | ---           | Transcribed locus                              | -1.02 | 0.75 | -1.09 | 0.4898 | 1.16  | 0.1751 | -1.19 | 0.1999 | 1.18  | 0.6336 |
| 161103_at   | 1435625_at   | Entpd7        | ectonucleoside triphosphate diphosphohydr      | 1.27  | 0.35 | 1.16  | 0.6471 | 1.55  | 0.2465 | -1.13 | 0.7116 | 2.33  | 0.0895 |
| 161104_at   | 1437208_at   | 4921515A04Rik | RIKEN cDNA 4921515A04 gene                     | 1.62  | 0.45 | 1.33  | 0.0552 | 1.25  | 0.1512 | 1.25  | 0.0983 | 1.12  | 0.2085 |
| 161110_at   | 1420064_s_at | Tkt1          | transketolase-like 1                           | 2.7   | 0.08 | 1.27  | 0.4697 | 1.01  | 0.9731 | -1.51 | 0.2459 | -2.65 | 0.28   |
| 161111_f_at | 1434959_at   | Dhh           | desert hedgehog                                | -1.36 | 0.1  | -1.01 | 0.8906 | 1.01  | 0.911  | -1.18 | 0.0792 | 1.17  | 0.5318 |

|             |              |                 |                                                |       |      |       |        |       |        |       |        |       |        |
|-------------|--------------|-----------------|------------------------------------------------|-------|------|-------|--------|-------|--------|-------|--------|-------|--------|
| 161114_i_at | 1453324_at   | 6330509M23Rik   | RIKEN cDNA 6330509M23 gene                     | 1.55  | 0.21 | 1.03  | 0.9233 | -1.14 | 0.62   | 2.05  | 0.1418 | 2.56  | 0.3315 |
| 161117_at   | 1420512_at   | Dkk2            | dickkopf homolog 2 (Xenopus laevis)            | -2.24 | 0.27 | 1.1   | 0.6807 | -1.17 | 0.4167 | -1.04 | 0.8544 | 1.26  | 0.2593 |
| 161119_at   | 1437920_at   | Epha5           | Eph receptor A5                                | -1.41 | 0.11 | -1.41 | 0.071  | -1.22 | 0.2311 | -1.36 | 0.0702 | 1.35  | 0.2005 |
| 161122_f_at | 1447919_x_at | Ndufab1         | NADH dehydrogenase (ubiquinone) 1, alpha       | 1.63  | 0.07 | -1.01 | 0.9451 | 1.08  | 0.4991 | 1.01  | 0.9511 | -1.31 | 0.0007 |
| 161126_at   | 1435998_at   | ---             | Gene model 288, (NCBI)                         | -2.77 | 0.01 | 1.6   | 0.1865 | 1.68  | 0.1561 | 1.57  | 0.2103 | 1.48  | 0.3933 |
| 161127_i_at | 1447653_x_at | Rpl24 /// LOC27 | ribosomal protein L24 /// similar to ribosomal | 1.57  | 0.22 | 1.12  | 0.1644 | 1.04  | 0.6022 | 1.15  | 0.0282 | 1.38  | 0.0389 |
| 161129_r_at | 1423948_at   | Bag2            | Bcl2-associated athanogene 2                   | -1.36 | 0.14 | 1.15  | 0.527  | -1.16 | 0.4868 | 1.03  | 0.8807 | 1.1   | 0.3221 |
| 161132_at   | 1422837_at   | Scel            | sciellin                                       | 2.06  | 0.41 | -2.38 | 0.0136 | -1.12 | 0.8162 | -1.18 | 0.7312 | 2.79  | 0.2205 |
| 161136_r_at | 1448002_x_at | 2610001J05Rik   | RIKEN cDNA 2610001J05 gene                     | -1.23 | 0.68 | 1.03  | 0.9375 | 1.15  | 0.6124 | 1.15  | 0.5376 | 1.27  | 0.5699 |
| 161145_f_at | 1456580_s_at | Atp5d           | ATP synthase, H+ transporting, mitochondri     | 1.9   | 0.14 | 1.09  | 0.2819 | 1.06  | 0.4997 | 1.14  | 0.1095 | -1.19 | 0.532  |
| 161147_f_at | 1452597_at   | 2310061C15Rik   | RIKEN cDNA 2310061C15 gene                     | 1.14  | 0.11 | -1.09 | 0.0816 | -1.01 | 0.8855 | -1.11 | 0.1241 | 1.09  | 0.3301 |
| 161351_r_at | 1420251_at   | ---             | ---                                            | -1.18 | 0.49 | -1.2  | 0.4466 | 1.11  | 0.6813 | -1.19 | 0.4769 | 2.97  | 0.3641 |
| 161362_at   | 1420229_at   | ---             | ---                                            | 1.33  | 0.51 | -1.09 | 0.6256 | -1.1  | 0.5476 | -1.11 | 0.5116 | 1.29  | 0.4986 |
| 161450_r_at | 1420261_at   | Psen1           | presenilin 1                                   | -2.4  | 0.36 | -1.1  | 0.8446 | 1.05  | 0.8909 | -1.05 | 0.8788 | 1.37  | 0.5818 |
| 161493_at   | 1420224_at   | ---             | ---                                            | 2.32  | 0.1  | 1.12  | 0.7186 | 2.02  | 0.0413 | 1.37  | 0.3212 | 2.12  | 0.0995 |
| 161496_r_at | 1420193_at   | Krt1-17         | keratin complex 1, acidic, gene 17             | -3.02 | 0.08 | 1.21  | 0.1336 | -1.16 | 0.3843 | 1.08  | 0.5742 | 2.1   | 0.0515 |
| 161511_f_at | 1431591_s_at | G1p2            | interferon, alpha-inducible protein            | -1.02 | 0.92 | 1.09  | 0.8717 | -1.17 | 0.4617 | 1.31  | 0.4723 | -1.55 | 0.3328 |
| 161539_f_at | 1434425_at   | Al597080        | expressed sequence Al597080                    | 2.62  | 0.04 | -1.42 | 0.1614 | 1.35  | 0.0904 | -1.17 | 0.5296 | 1.59  | 0.4915 |
| 161543_at   | 1449783_at   | ---             | ---                                            | 3.18  | 0.04 | -1.07 | 0.688  | -1.16 | 0.4742 | 1.04  | 0.8089 | 1.65  | 0.1178 |
| 161595_at   | 1420243_at   | Zfx1a           | zinc finger homeobox 1a                        | 3.54  | 0.26 | -1.17 | 0.3539 | -1.44 | 0.0897 | -2.05 | 0.0041 | 1.62  | 0.2793 |
| 161665_at   | 1449630_s_at | Mark1           | MAP/microtubule affinity-regulating kinase 1   | -1.11 | 0.62 | -1.39 | 0.0886 | -1.29 | 0.1328 | -1.21 | 0.3009 | 1.77  | 0.1512 |
| 161666_f_at | 1449773_s_at | Gadd45b         | growth arrest and DNA-damage-inducible 4b      | 2.56  | 0.22 | 3.15  | 0.1887 | 3.84  | 0.2414 | 4.05  | 0.06   | 13.24 | 0.034  |
| 161693_r_at | 1420246_at   | D1Ertd161e      | DNA segment, Chr 1, ERATO Doi 161, expr        | 1.05  | 0.84 | 1.09  | 0.6617 | 1.2   | 0.3818 | 1.23  | 0.3417 | 1.9   | 0.1248 |
| 161705_r_at | 1420202_at   | ---             | ---                                            | -2.47 | 0.12 | -1.05 | 0.8643 | -1.17 | 0.3736 | -1.33 | 0.1372 | 1.06  | 0.8801 |
| 161736_r_at | 1449771_at   | ---             | ---                                            | -2.81 | 0.13 | 1.12  | 0.7067 | 1.62  | 0.1229 | -1.06 | 0.8256 | 1.87  | 0.031  |
| 161765_f_at | 1416882_at   | Rgs10           | regulator of G-protein signalling 10           | -1.18 | 0.05 | 1.12  | 0.3237 | 1.02  | 0.8763 | 1.12  | 0.4013 | -1.23 | 0.6168 |
| 161769_r_at | 1420235_at   | Bph1            | biphenyl hydrolase-like (serine hydrolase, br  | -1.38 | 0.13 | -1.33 | 0.0769 | -1.36 | 0.0131 | -1.4  | 0.0084 | 1.98  | 0.0812 |
| 161822_at   | 1427222_a_at | Svp2            | seminal vesicle protein 2                      | -1.18 | 0.84 | -1.1  | 0.6982 | -1.44 | 0.1887 | -1.17 | 0.5505 | -1.76 | 0.3079 |
| 161825_f_at | 1448573_a_at | Ceacam10        | CEA-related cell adhesion molecule 10          | 1.29  | 0.18 | -1.13 | 0.3712 | -1.04 | 0.7725 | -1.28 | 0.0861 | -1.06 | 0.6468 |
| 161839_f_at | 1422656_at   | Rasl2-9         | RAS-like, family 2, locus 9                    | 2.51  | 0.01 | 1.26  | 0.0067 | 1.11  | 0.3443 | 1.42  | 0.0015 | -1.1  | 0.652  |
| 161857_r_at | 1427176_s_at | Al428936        | expressed sequence Al428936                    | -1.05 | 0.92 | -1.01 | 0.946  | 1.02  | 0.9021 | 1.04  | 0.7425 | 1.45  | 0.3382 |
| 161864_f_at | 1441866_s_at | Ptdss1          | phosphatidylserine synthase 1                  | 1.01  | 0.92 | -1.16 | 0.0132 | -1.11 | 0.0453 | 1.04  | 0.7132 | 1.38  | 0.0039 |
| 161917_i_at | 1449804_at   | Pnmt            | phenylethanolamine-N-methyltransferase         | -1.18 | 0.47 | -1.02 | 0.9568 | 1.49  | 0.1385 | -1.09 | 0.8015 | 1.58  | 0.3858 |
| 161942_f_at | 1439144_at   | Cwf19I1         | CWF19-like 1, cell cycle control (S. pombe)    | -1.02 | 0.98 | -1.78 | 0.0111 | -1.47 | 0.0466 | -2.44 | 0.0006 | 1.03  | 0.9456 |
| 161947_f_at | 1426039_a_at | Alox12e         | arachidonate lipoxygenase, epidermal           | 1.02  | 0.9  | -1.22 | 0.0445 | -1.04 | 0.5196 | -1.25 | 0.0133 | -1.05 | 0.7454 |
| 162049_f_at | 1424150_at   | Gdpd5           | glycerophosphodiester phosphodiesterase d      | 1.77  | 0.11 | -1.13 | 0.1835 | -1.12 | 0.223  | -1.17 | 0.1133 | 1.78  | 0.1811 |
| 162055_f_at | 1433723_s_at | Serf2           | Small EDRK-rich factor 2                       | 1.17  | 0.57 | -1.27 | 0.0465 | -1.26 | 0.1147 | -1.21 | 0.0819 | 1.08  | 0.5039 |
| 162058_f_at | 1418767_at   | Cyp4f13         | cytochrome P450, family 4, subfamily f, poly   | -1.67 | 0.27 | -1.6  | 0.069  | -1.05 | 0.8219 | -1.57 | 0.117  | -1.38 | 0.603  |
| 162061_f_at | 1439393_x_at | Ppp2r4          | protein phosphatase 2A, regulatory subunit I   | 1.09  | 0.92 | 1.19  | 0.2137 | 1.25  | 0.0674 | -1.01 | 0.9702 | 1.48  | 0.1779 |
| 162084_i_at | 1420240_at   | ---             | ---                                            | -1.61 | 0.5  | 1.07  | 0.7334 | 1.03  | 0.8804 | 1.23  | 0.2218 | 1.7   | 0.0935 |
| 162099_f_at | 1417224_a_at | Cd2bp2          | CD2 antigen (cytoplasmic tail) binding protei  | 1.46  | 0.31 | 1.09  | 0.719  | 1.17  | 0.4645 | 1.04  | 0.8687 | -1.48 | 0.168  |
| 162103_i_at | 1420280_x_at | Col9a3          | procollagen, type IX, alpha 3                  | 1.34  | 0.6  | -1.05 | 0.8516 | -1.08 | 0.7542 | -1.19 | 0.4708 | -1.04 | 0.9339 |
| 162109_f_at | 1455149_at   | Sh3md2          | SH3 multiple domains 2                         | -1.05 | 0.91 | 1.33  | 0.4838 | 1.05  | 0.9142 | 1.44  | 0.2782 | 1.99  | 0.2757 |
| 162114_f_at | 1416826_a_at | Trfp            | Trf (TATA binding protein-related factor)-pro  | -1.61 | 0.17 | 1     | 0.9767 | 1.06  | 0.6895 | -1.09 | 0.3493 | -1.1  | 0.5067 |
| 162138_s_at | 1424407_s_at | Cbx6            | chromobox homolog 6                            | -1.06 | 0.87 | 1.22  | 0.0422 | 1.25  | 0.0202 | 1.27  | 0.0564 | 1.92  | 0.0572 |
| 162151_i_at | 1420248_at   | Tubg2           | tubulin, gamma 2                               | 1.1   | 0.73 | -1.32 | 0.3497 | -1.26 | 0.4564 | -1.46 | 0.2226 | -2.28 | 0.2682 |
| 162161_r_at | 1420273_x_at | ---             | ---                                            | -1.25 | 0.54 | -1.34 | 0.1916 | -1.26 | 0.2023 | -1.13 | 0.5493 | 1.3   | 0.5094 |
| 162174_at   | 1419349_a_at | Cyp2d9          | cytochrome P450, family 2, subfamily d, poly   | -1.3  | 0.36 | 1.76  | 0.0094 | 1.23  | 0.3105 | 1.82  | 0.0051 | 1     | 0.9967 |
| 162198_f_at | 1420249_s_at | Ccl6            | chemokine (C-C motif) ligand 6                 | 1.61  | 0.46 | -1.28 | 0.1189 | -1.02 | 0.832  | -1.35 | 0.0587 | 1.27  | 0.5636 |
| 162212_at   | 1420292_x_at | ---             | ---                                            | -2.94 | 0.49 | -1.49 | 0.4076 | -1.61 | 0.3739 | 1.03  | 0.9595 | 2.44  | 0.3629 |
| 162229_at   | 1420303_x_at | ---             | Transcribed locus, strongly similar to XP_34   | -1.16 | 0.65 | 1.27  | 0.0597 | 1.16  | 0.105  | 1.24  | 0.0208 | 1.39  | 0.1414 |
| 162278_r_at | 1449803_x_at | Tap1            | Transporter 1, ATP-binding cassette, sub-fa    | -1.33 | 0.49 | -1.07 | 0.6804 | -1.01 | 0.9506 | -1.12 | 0.5404 | 1.18  | 0.3243 |
| 162330_f_at | 1420270_at   | ---             | ---                                            | -1.13 | 0.55 | 1.07  | 0.4964 | 1.05  | 0.6511 | 1.08  | 0.3214 | 1.24  | 0.3458 |



|            |              |                  |                                                 |       |      |       |        |       |        |       |        |       |        |
|------------|--------------|------------------|-------------------------------------------------|-------|------|-------|--------|-------|--------|-------|--------|-------|--------|
| 162453_at  | 1420189_at   | ---              | ---                                             | 2.31  | 0.08 | 1.08  | 0.6922 | 1.46  | 0.0271 | 1.34  | 0.0409 | 1.41  | 0.496  |
| 92180_at   | 1436517_at   | H1fx             | H1 histone family, member X                     | -1.05 | 0.9  | 1.32  | 0.0226 | 1.13  | 0.4794 | 1.26  | 0.1132 | 1.47  | 0.0805 |
| 92181_at   | 1420428_at   | Ager             | advanced glycosylation end product-specific     | -1.53 | 0.56 | 1.63  | 0.0725 | 1.09  | 0.1317 | 1.36  | 0.198  | 1.72  | 0.12   |
| 92182_at   | 1434131_at   | Rufy1            | RUN and FYVE domain containing 1                | -1.03 | 0.92 | 1.22  | 0.2021 | 1.31  | 0.094  | 1.09  | 0.601  | -1.02 | 0.8832 |
| 92184_at   | 1427588_a_at | Dtna             | dystrobrevin alpha                              | -1.44 | 0.28 | -1.07 | 0.4461 | -1.17 | 0.0742 | -1.14 | 0.2491 | -1.83 | 0.4473 |
| 92185_at   | 1436512_at   | Arl7             | ADP-ribosylation factor-like 7                  | -1.13 | 0.75 | 1.07  | 0.3614 | 1.03  | 0.7514 | 1.09  | 0.4706 | -1.09 | 0.6997 |
| 92186_at   | 1420926_at   | Arx              | aristaless related homeobox gene (Drosophi      | -1.23 | 0.68 | 1.94  | 0.032  | 1.51  | 0.0798 | 2     | 0.0027 | 1.4   | 0.4394 |
| 92188_s_at | 1452410_a_at | Fes              | feline sarcoma oncogene                         | 2.65  | 0.01 | 1.13  | 0.4876 | 1.12  | 0.4114 | 1.15  | 0.5084 | 1.41  | 0.4345 |
| 92189_at   | 1449263_at   | 1810045K17Rik    | RIKEN cDNA 1810045K17 gene                      | 1.11  | 0.51 | -1.12 | 0.088  | -1.2  | 0.0892 | -1.29 | 0.0041 | -1.4  | 0.0134 |
| 92190_at   | 1418605_at   | Nr2c1            | nuclear receptor subfamily 2, group C, mem      | 1.09  | 0.83 | -1.35 | 0.017  | -1.04 | 0.5862 | -1.3  | 0.0187 | -1.42 | 0.1269 |
| 92192_s_at | 1451406_a_at | Pcsk5            | proprotein convertase subtilisin/kexin type 5   | 3.62  | 0.17 | 1.6   | 0.0657 | 1.5   | 0.272  | -1.08 | 0.7474 | 3.79  | 0.0655 |
| 92194_at   | 1452475_at   | Pcsk5            | proprotein convertase subtilisin/kexin type 5   | -1.31 | 0.1  | -1.24 | 0.0107 | -1.13 | 0.0197 | -1.26 | 0.0009 | 1.29  | 0.1076 |
| 92195_at   | 1451639_at   | Cebpg            | CCAAT/enhancer binding protein (C/EBP), $\zeta$ | 1.27  | 0.31 | -1.02 | 0.872  | 1.26  | 0.1221 | -1.09 | 0.4455 | -1.33 | 0.2239 |
| 92197_r_at | 1455546_s_at | Sf3a2            | splicing factor 3a, subunit 2                   | -1.66 | 0.1  | 1.17  | 0.2221 | 1.07  | 0.6745 | -1.25 | 0.1294 | 1.59  | 0.2363 |
| 92198_s_at | 1419727_at   | Daf2             | decay accelerating factor 2                     | 1.88  | 0.11 | -1.12 | 0.6191 | -1.04 | 0.8645 | -1.09 | 0.7468 | 1.26  | 0.5645 |
| 92199_at   | 1422102_a_at | Stat5b           | signal transducer and activator of transcripti  | 2.18  | 0.24 | -1.11 | 0.3107 | -1.18 | 0.2624 | -1.22 | 0.0596 | -1.03 | 0.9258 |
| 92200_at   | 1423427_at   | Adcyap1          | adenylate cyclase activating polypeptide 1      | -1.5  | 0.57 | -1.39 | 0.2501 | -1.22 | 0.4574 | -1.12 | 0.7124 | 2     | 0.3249 |
| 92202_g_at | 1442025_a_at | ---              | ---                                             | 1.07  | 0.9  | -1.44 | 0.2341 | 3.12  | 0.0346 | 3.42  | 0.0013 | 3.17  | 0.0214 |
| 92204_at   | 1451910_a_at | Cd6              | CD6 antigen                                     | -1.03 | 0.83 | 1.17  | 0.2258 | 1.38  | 0.0874 | 1.25  | 0.1627 | 1.26  | 0.14   |
| 92205_at   | 1443969_at   | LOC384783        | similar to Insulin receptor substrate-2 (IRS-2  | -2.5  | 0.01 | 1.79  | 0.1602 | 2.12  | 0.019  | 1.65  | 0.1093 | 3.3   | 0.0334 |
| 92206_at   | 1456870_at   | A430107D22Rik    | RIKEN cDNA A430107D22 gene                      | 2.07  | 0.18 | 1.25  | 0.2947 | 1.16  | 0.4648 | 1.56  | 0.0344 | 1.59  | 0.131  |
| 92208_at   | 1427944_at   | C1qdc1           | C1q domain containing 1                         | 1.04  | 0.79 | 1.53  | 0.0228 | 1.49  | 0.051  | 1.46  | 0.0453 | 1.94  | 0.012  |
| 92209_at   | 1416504_at   | Ulk1             | Unc-51 like kinase 1 (C. elegans)               | 1.18  | 0.85 | -1.21 | 0.0255 | 1.06  | 0.6883 | -1.14 | 0.1337 | -3.05 | 0.1476 |
| 92210_at   | 1448831_at   | Angpt2           | angiopoietin 2                                  | 1.86  | 0    | -1.13 | 0.3825 | -1.04 | 0.728  | 1.03  | 0.8288 | -1.47 | 0.1457 |
| 92213_at   | 1449201_at   | Star             | steroidogenic acute regulatory protein          | 1.11  | 0.81 | 1.57  | 0.0345 | 1.75  | 0.0224 | 1.82  | 0.0068 | 1.13  | 0.7087 |
| 92214_at   | 1422632_at   | Ctsw             | cathepsin W                                     | -1.1  | 0.46 | 1.57  | 0.1374 | 1.07  | 0.546  | 1.18  | 0.2166 | 1.29  | 0.0354 |
| 92215_at   | 1450536_s_at | Krtap12-1        | keratin associated protein 12-1                 | -1.22 | 0.03 | -1.17 | 0.3749 | -1.16 | 0.3608 | -1.12 | 0.5132 | 1.3   | 0.3236 |
| 92216_at   | 1423389_at   | Smad7            | MAD homolog 7 (Drosophila)                      | -1.02 | 0.92 | 1.02  | 0.8727 | 1.17  | 0.3855 | 1.27  | 0.0331 | 1     | 0.9678 |
| 92217_s_at | 1420394_s_at | Gp49a /// Lilrb4 | glycoprotein 49 A /// leukocyte immunoglobu     | 2.25  | 0.04 | 2.08  | 0.2885 | -1.12 | 0.6012 | 2.2   | 0.2825 | 1.44  | 0.031  |
| 92219_s_at | 1422055_at   | Mid1             | midline 1                                       | -1.57 | 0.08 | 1.4   | 0.2227 | 1.12  | 0.2455 | 1.03  | 0.7461 | 1.26  | 0.6947 |
| 92220_s_at | 1425532_a_at | Bin1             | bridging integrator 1                           | -1.32 | 0.38 | -1.28 | 0.0452 | -1.02 | 0.8719 | -1.36 | 0.0195 | -1.19 | 0.4918 |
| 92223_at   | 1449401_at   | C1qg             | complement component 1, q subcomponent          | 1.21  | 0.34 | 1.18  | 0.3338 | -1.08 | 0.3111 | 1.35  | 0.3397 | -1.03 | 0.8333 |
| 92224_at   | 1449466_at   | Clec3b           | C-type lectin domain family 3, member b         | -1.39 | 0.63 | -3.27 | 0.0368 | -2.12 | 0.1154 | -2.57 | 0.0719 | -1.16 | 0.7808 |
| 92226_at   | 1417875_at   | Ddx50            | DEAD (Asp-Glu-Ala-Asp) box polypeptide 5c       | 1.4   | 0.04 | 1.24  | 0.081  | 1.18  | 0.0618 | 1.27  | 0.0676 | -1.1  | 0.6032 |
| 92228_at   | 1448895_a_at | Catna2           | catenin alpha 2                                 | -1.38 | 0.54 | 1.6   | 0.0893 | 1.48  | 0.0746 | 1.14  | 0.5798 | 1.42  | 0.6354 |
| 92229_at   | 1418790_at   | Zfp312           | zinc finger protein 312                         | 1.5   | 0.08 | -2.07 | 0.0096 | -1.63 | 0.0304 | -1.8  | 0.0085 | 1.88  | 0.0953 |
| 92230_at   | 1424981_at   | Nln              | neurolysin (metallopeptidase M3 family)         | 3.05  | 0    | 1.23  | 0.2138 | 1.27  | 0.1089 | 1.37  | 0.0163 | 1.4   | 0.253  |
| 92232_at   | 1416576_at   | Socs3            | suppressor of cytokine signaling 3              | -4.3  | 0.14 | 1.81  | 0.3434 | -1.21 | 0.3347 | 1.63  | 0.5042 | -2.25 | 0.0493 |
| 92233_at   | 1418007_at   | 1810007M14Rik    | RIKEN cDNA 1810007M14 gene                      | 1.36  | 0.43 | 1.13  | 0.064  | 1.33  | 0.0264 | 1.46  | 0.0001 | 1.48  | 0.0562 |
| 92235_g_at | 1425762_a_at | Rxra             | retinoid X receptor alpha                       | -1.05 | 0.57 | -1.01 | 0.8844 | -1.02 | 0.8253 | -1.17 | 0.1165 | -1.11 | 0.6042 |
| 92237_at   | 1418782_at   | Rxrg             | retinoid X receptor gamma                       | -2.97 | 0.39 | 1.11  | 0.787  | -1.58 | 0.3233 | -1.55 | 0.3412 | 1.01  | 0.9717 |
| 92239_at   | 1452524_a_at | Elavl3           | ELAV (embryonic lethal, abnormal vision, Dr     | -1.15 | 0.83 | -1.09 | 0.625  | 1.02  | 0.9346 | -1.1  | 0.6311 | -1.07 | 0.8566 |
| 92240_at   | 1422958_at   | Krtap5-4         | keratin associated protein 5-4                  | -2.92 | 0.08 | -3.18 | 0.0001 | -1.43 | 0.0915 | -2.52 | 0.0007 | -2.13 | 0.1993 |
| 92241_at   | 1435527_at   | 1500041O16Rik    | RIKEN cDNA 1500041O16 gene                      | -1.5  | 0.18 | -1.26 | 0.0412 | -1.64 | 0.0132 | -1.58 | 0.0068 | -1.08 | 0.6663 |
| 92242_at   | 1419319_at   | Saa4             | serum amyloid A 4                               | -1.21 | 0.77 | -1.13 | 0.5871 | -1.44 | 0.1259 | 1.04  | 0.8311 | -3.37 | 0.0917 |
| 92243_at   | 1434609_at   | B930007L02Rik    | RIKEN cDNA B930007L02 gene                      | -1.72 | 0.05 | 1.09  | 0.1288 | 1.25  | 0.0011 | 1.18  | 0.0396 | 1.26  | 0.0249 |
| 92244_at   | 1418026_at   | Exo1             | exonuclease 1                                   | -1.43 | 0.56 | -1.06 | 0.8619 | -1.22 | 0.5815 | -1.1  | 0.8022 | 1.04  | 0.8226 |
| 92246_at   | 1419707_at   | Krtap14          | keratin associated protein 14                   | -1.67 | 0.18 | -1.3  | 0.0924 | -1.15 | 0.4048 | -1.23 | 0.1638 | 1.45  | 0.1318 |
| 92249_g_at | 1450749_a_at | Nr4a2            | nuclear receptor subfamily 4, group A, mem      | -1.21 | 0.04 | 1.03  | 0.8349 | 1.1   | 0.4204 | 1.19  | 0.1784 | 1.38  | 0.4512 |
| 92250_s_at | 1449250_at   | Prcc             | papillary renal cell carcinoma (translocation-  | -1.18 | 0.32 | -1.15 | 0.2257 | -1.07 | 0.6235 | -1.14 | 0.3184 | -1.04 | 0.9027 |
| 92252_at   | 1421195_at   | Cckar            | cholecystokinin A receptor                      | 1.77  | 0.34 | -1.25 | 0.6213 | -1.41 | 0.3846 | 1.26  | 0.6006 | 1.32  | 0.6618 |
| 92253_at   | 1449919_at   | Krtap6-2         | keratin associated protein 6-2                  | -1.99 | 0.1  | -1.55 | 0.2827 | -1.41 | 0.3621 | -1.11 | 0.8071 | -1.59 | 0.3434 |
| 92254_at   | 1452298_a_at | Myo5b            | myosin Vb                                       | 1.41  | 0.28 | -1.23 | 0.0004 | -1.2  | 0.0017 | -1.21 | 0.0055 | -1.43 | 0.0789 |

|            |              |                  |                                                  |       |      |       |        |       |        |       |        |       |        |
|------------|--------------|------------------|--------------------------------------------------|-------|------|-------|--------|-------|--------|-------|--------|-------|--------|
| 92256_at   | 1417491_at   | Ctsb             | cathepsin B                                      | 1.82  | 0.13 | 1.08  | 0.453  | 1.19  | 0.0679 | 1.16  | 0.1903 | 1.03  | 0.8915 |
| 92257_at   | 1418659_at   | Clock            | circadian locomoter output cycles kaput          | -1.3  | 0.42 | -1.08 | 0.4083 | -1.22 | 0.0149 | -1.19 | 0.0375 | 1.07  | 0.7058 |
| 92258_at   | 1429597_at   | Dppa4            | developmental pluripotency associated 4          | -3.66 | 0.09 | -1.38 | 0.3458 | 1.31  | 0.4219 | -1.27 | 0.5447 | -2.33 | 0.0143 |
| 92260_at   | 1427804_at   | ---              | MRNA containing B1 element, clone vario          | -2.43 | 0.29 | 1.24  | 0.1903 | 1.11  | 0.4178 | 1.07  | 0.5325 | 1.6   | 0.4511 |
| 92261_at   | 1435231_at   | Coq4             | coenzyme Q4 homolog (yeast)                      | 1.01  | 0.97 | 1.08  | 0.3873 | -1.02 | 0.8379 | 1.17  | 0.0353 | 1.43  | 0.4683 |
| 92262_at   | 1449353_at   | Wig1             | wild-type p53-induced gene 1                     | 1.03  | 0.92 | -1.03 | 0.7799 | -1.1  | 0.3325 | 1.09  | 0.5113 | -1.16 | 0.5289 |
| 92263_at   | 1449531_at   | Leprel2          | leprecan-like 2                                  | 1.44  | 0.35 | -1.04 | 0.6489 | 1.04  | 0.5623 | -1.18 | 0.0141 | 1.59  | 0.302  |
| 92264_at   | 1450485_at   | Sox3             | SRY-box containing gene 3                        | -1.15 | 0.63 | 1.09  | 0.3133 | 1.09  | 0.3057 | 1.04  | 0.7553 | 1.17  | 0.5388 |
| 92266_at   | 1449982_at   | Il11             | interleukin 11                                   | 1.52  | 0    | 1.03  | 0.6805 | 1.23  | 0.0699 | 1.2   | 0.0536 | 1.52  | 0.2167 |
| 92268_at   | 1436859_at   | 2700007P21Rik    | RIKEN cDNA 2700007P21 gene                       | -1.15 | 0.58 | 1.09  | 0.2748 | 1.3   | 0.1058 | 1.13  | 0.1151 | -2.15 | 0.0056 |
| 92270_at   | 1426016_a_at | Tro              | trophinin                                        | -2.71 | 0.23 | -1.23 | 0.1465 | -1.28 | 0.0647 | -1.34 | 0.0289 | 1.06  | 0.7929 |
| 92272_at   | 1455310_at   | Rbm16            | RNA binding motif protein 16                     | -1.08 | 0.69 | 1.12  | 0.4398 | 1.12  | 0.5748 | 1.07  | 0.6822 | 1.25  | 0.2239 |
| 92273_at   | 1419125_at   | Ptpn18           | protein tyrosine phosphatase, non-receptor 1     | -1.06 | 0.82 | 1.78  | 0      | 1.43  | 0      | 1.68  | 0      | -1.03 | 0.9083 |
| 92274_at   | 1449830_at   | Prlpi            | prolactin-like protein I                         | -1.53 | 0.44 | -1.33 | 0.2161 | -1.95 | 0.0152 | -1.42 | 0.2216 | 1.34  | 0.3884 |
| 92275_at   | 1436392_s_at | Tcfap2c          | transcription factor AP-2, gamma                 | -1.7  | 0.04 | 1.21  | 0.1109 | 1.21  | 0.4168 | 1.09  | 0.5385 | 1.55  | 0.0875 |
| 92276_at   | 1449901_a_at | Map3k6           | mitogen-activated protein kinase kinase kinase   | -1.33 | 0.24 | 1.11  | 0.4901 | 1.13  | 0.3278 | 1.07  | 0.5318 | 1.23  | 0.0619 |
| 92277_at   | 1420160_s_at | Myo1e            | myosin IE                                        | 1.85  | 0.19 | -1.07 | 0.8162 | -1.17 | 0.5884 | -1.14 | 0.6798 | 1.32  | 0.1183 |
| 92278_at   | 1460727_at   | Ercc2            | excision repair cross-complementing rodent       | -1.02 | 0.92 | -1.18 | 0.0936 | -1.08 | 0.4651 | -1.18 | 0.014  | 1.5   | 0.0186 |
| 92279_at   | 1460583_at   | Golt1b           | golgi transport 1 homolog B (S. cerevisiae)      | -1.04 | 0.78 | -1.25 | 0.046  | 1.17  | 0.1809 | -1.19 | 0.2252 | 1.28  | 0.2868 |
| 92280_at   | 1427385_s_at | Actn1            | actinin, alpha 1                                 | -1.13 | 0.8  | 1.09  | 0.2543 | -1.02 | 0.9305 | -1.04 | 0.7795 | 1.5   | 0.0641 |
| 92282_at   | 1427887_at   | 2610304G08Rik    | RIKEN cDNA 2610304G08 gene                       | 1.52  | 0.15 | 1.11  | 0.2256 | 1.05  | 0.6409 | 1.07  | 0.4639 | -1.15 | 0.0779 |
| 92286_g_at | 1449864_at   | Il4              | interleukin 4                                    | -1.02 | 0.96 | -1.94 | 0.0011 | -1.52 | 0.0464 | -1.24 | 0.1976 | 2.13  | 0.2176 |
| 92289_at   | 1427486_at   | Ptprb            | protein tyrosine phosphatase, receptor type,     | 2.06  | 0.22 | -1.24 | 0.424  | -2.74 | 0.0019 | -2.42 | 0.0073 | 2.09  | 0.0998 |
| 92290_at   | 1419404_s_at | Siah1a /// Siah1 | seven in absentia 1A /// seven in absentia 1I    | -1.37 | 0.23 | -1.15 | 0.1458 | -1.17 | 0.1058 | -1.14 | 0.2036 | 1.06  | 0.4739 |
| 92291_f_at | 1419436_at   | Cfh1             | complement component factor h-like 1             | -1.42 | 0.16 | 1.28  | 0.1355 | 1.29  | 0.1083 | 1.06  | 0.6172 | -1.02 | 0.8469 |
| 92292_at   | 1421924_at   | Slc2a3           | solute carrier family 2 (facilitated glucose tra | 1.86  | 0.11 | 1.25  | 0.2131 | 1.44  | 0.066  | 1.1   | 0.673  | 1.33  | 0.2505 |
| 92293_at   | 1434709_at   | C130076O07Rik    | RIKEN cDNA C130076O07 gene                       | -1.52 | 0.16 | -1.12 | 0.4407 | -1.04 | 0.8257 | -1.18 | 0.2652 | 1.02  | 0.8685 |
| 92294_at   | 1447926_at   | Arl5             | ADP-ribosylation factor-like 5                   | 1.41  | 0.21 | -1.35 | 0.02   | -1.17 | 0.2482 | -1.66 | 0.0011 | 1.16  | 0.5075 |
| 92295_at   | 1419717_at   | Sema3e           | sema domain, immunoglobulin domain (Ig),         | -1.73 | 0.5  | -1.17 | 0.548  | 1.06  | 0.8001 | -1.09 | 0.7281 | -1.05 | 0.9136 |
| 92296_at   | 1421284_at   | Pign             | phosphatidylinositol glycan, class N             | 1.51  | 0.57 | 1.13  | 0.62   | 1.31  | 0.3783 | -1.65 | 0.1469 | -1.85 | 0.1846 |
| 92300_at   | 1418192_at   | Mnt              | max binding protein                              | 2.87  | 0.14 | 2.71  | 0.0134 | -1.28 | 0.4567 | 2.84  | 0.0219 | 1.25  | 0.2407 |
| 92301_at   | 1417813_at   | Ikbke            | inhibitor of kappaB kinase epsilon               | 1.91  | 0.38 | 1.47  | 0.3195 | 1.11  | 0.4718 | 2.46  | 0.003  | 1.05  | 0.6021 |
| 92302_at   | 1452281_at   | Sos2             | Son of sevenless homolog 2 (Drosophila)          | 1.63  | 0.15 | 1.54  | 0.0071 | 1.35  | 0.287  | 1.43  | 0.0047 | 1.01  | 0.9679 |
| 92305_s_at | 1427725_a_at | Pou2f2           | POU domain, class 2, transcription factor 2      | -1.51 | 0.29 | 1.18  | 0.0602 | -1.02 | 0.8875 | 1.35  | 0.0814 | 1.49  | 0.4222 |
| 92306_at   | 1427346_at   | Ott /// LOC4348  | ovary testis transcribed /// similar to Ott prot | 1.01  | 0.94 | 1     | 0.9942 | -1.16 | 0.6475 | 1.28  | 0.5445 | 2.36  | 0.219  |
| 92308_at   | 1422541_at   | Ptpm             | protein tyrosine phosphatase, receptor type,     | -1.11 | 0.17 | -1.09 | 0.7119 | -1.23 | 0.422  | 1.12  | 0.5862 | 1.42  | 0.4587 |
| 92310_at   | 1427005_at   | Plk2             | polo-like kinase 2 (Drosophila)                  | -1.79 | 0.01 | 1.01  | 0.8427 | 1.11  | 0.1779 | 1.15  | 0.1673 | 1.08  | 0.5013 |
| 92311_s_at | 1425862_a_at | Pik3c2a          | phosphatidylinositol 3-kinase, C2 domain co      | 1.05  | 0.95 | 1.54  | 0.1771 | 2.22  | 0.0465 | -1.13 | 0.5959 | 1.91  | 0.207  |
| 92314_at   | 1427391_a_at | Col12a1          | procollagen, type XII, alpha 1                   | 2.15  | 0.1  | 1.16  | 0.4307 | 1.19  | 0.3698 | -1.41 | 0.2332 | 1.48  | 0.2175 |
| 92315_at   | 1427102_at   | Slnf4            | schlafen 4                                       | -1.57 | 0.09 | 1.59  | 0.2285 | 1.01  | 0.9281 | 2.35  | 0.2025 | 1.29  | 0.1913 |
| 92317_at   | 1421881_a_at | Elavl2           | ELAV (embryonic lethal, abnormal vision, Dr      | -1.15 | 0.82 | -1.34 | 0.0911 | 1.48  | 0.0825 | 1.15  | 0.6064 | 1.11  | 0.8417 |
| 92318_at   | 1419773_at   | 2010301N04Rik    | RIKEN cDNA 2010301N04 gene                       | -2.17 | 0.35 | 1.32  | 0.4742 | 1.03  | 0.9292 | 1.06  | 0.8639 | 2.23  | 0.0335 |
| 92321_r_at | 1447963_at   | ---              | ---                                              | 1.42  | 0.36 | -2.01 | 0.0107 | -1.34 | 0.232  | -1.45 | 0.1344 | 1.32  | 0.1174 |
| 92322_at   | 1419691_at   | Camp             | cathelicidin antimicrobial peptide               | -1.52 | 0.07 | -1.3  | 0.1167 | -1.38 | 0.0944 | -1.8  | 0.0021 | 1.63  | 0.0288 |
| 92323_at   | 1449283_a_at | Mapk12           | mitogen-activated protein kinase 12              | -1.02 | 0.91 | -1.13 | 0.3157 | 1.19  | 0.0896 | 1.07  | 0.6154 | 1.17  | 0.4246 |
| 92324_at   | 1429303_at   | Zfp393           | zinc finger protein 393                          | 2     | 0.03 | -1.04 | 0.858  | 1.05  | 0.8238 | 1.06  | 0.8213 | -1.01 | 0.9736 |
| 92325_at   | 1452589_at   | Ptk7             | PTK7 protein tyrosine kinase 7                   | -1.6  | 0.28 | 1.57  | 0.223  | 1.5   | 0.1855 | 1.73  | 0.1333 | 1.67  | 0.1503 |
| 92328_at   | 1427655_a_at | A630038E17Rik    | RIKEN cDNA A630038E17 gene                       | -2.6  | 0.01 | 2.8   | 0.0153 | 1.84  | 0.0759 | 2.55  | 0.0163 | 1.34  | 0.3094 |
| 92329_at   | 1450516_a_at | Rab17            | RAB17, member RAS oncogene family                | 1.05  | 0.93 | 1.05  | 0.6744 | 1.04  | 0.7275 | 1.11  | 0.3033 | -1.06 | 0.6064 |
| 92331_at   | 1422975_at   | Mme              | membrane metallo endopeptidase                   | -1.44 | 0.41 | -6.12 | 0      | -1.57 | 0.023  | -9.85 | 0      | -2.44 | 0.3673 |
| 92332_at   | 1448877_at   | Dlx2             | distal-less homeobox 2                           | -1.39 | 0.76 | 1.14  | 0.6531 | -1.01 | 0.9789 | 1.17  | 0.6836 | 1.06  | 0.9323 |
| 92335_at   | 1418061_at   | Ltpb2            | latent transforming growth factor beta bindin    | 2.44  | 0.05 | -1.32 | 0.2599 | 1.37  | 0.1807 | -1.04 | 0.8555 | -1.48 | 0.2511 |
| 92338_f_at | 1424872_at   | 2310001H12Rik    | RIKEN cDNA 2310001H12 gene                       | 1.87  | 0.05 | 1.27  | 0.0931 | -1.1  | 0.6242 | 1.13  | 0.297  | -1.98 | 0.0625 |

|            |              |              |                                                 |       |      |       |        |       |        |       |        |       |        |
|------------|--------------|--------------|-------------------------------------------------|-------|------|-------|--------|-------|--------|-------|--------|-------|--------|
| 92339_at   | 1419702_at   | Taf1a        | TATA box binding protein (Tbp)-associated 1     | 2.14  | 0.22 | 1.19  | 0.216  | 1.48  | 0.0083 | 1.2   | 0.1452 | 1.38  | 0.4396 |
| 92342_at   | 1422205_at   | Sox1         | SRY-box containing gene 1                       | 1.28  | 0.45 | 1.17  | 0.6125 | 1.08  | 0.8007 | -1.11 | 0.7662 | 1.06  | 0.8681 |
| 92345_g_at | 1451901_at   | Smarca3      | SWI/SNF related, matrix associated, actin di    | -1.84 | 0.25 | 1.01  | 0.91   | 1.09  | 0.1009 | 1.02  | 0.753  | 1.55  | 0.0791 |
| 92347_at   | 1421980_at   | Kcnc3        | potassium voltage gated channel, Shaw-rela      | -1.35 | 0.54 | -1.6  | 0.07   | -1.48 | 0.1422 | -1.15 | 0.6305 | 1.6   | 0.2036 |
| 92348_at   | 1454675_at   | Thra         | thyroid hormone receptor alpha                  | 1.07  | 0.62 | 1.07  | 0.2232 | -1.07 | 0.4163 | -1.01 | 0.9009 | 1.47  | 0.0139 |
| 92350_at   | 1428819_at   | Mapre1       | microtubule-associated protein, RP/EB famil     | 1.11  | 0.64 | -1.36 | 0.004  | -1.18 | 0.0522 | -1.15 | 0.0607 | 1.01  | 0.9025 |
| 92352_at   | 1460661_at   | Edg3         | endothelial differentiation, sphingolipid G-prc | -1.51 | 0.03 | -1.1  | 0.3288 | -1.09 | 0.459  | -1.14 | 0.1317 | 1.14  | 0.3797 |
| 92353_at   | 1448982_at   | Prss18       | protease, serine, 18                            | 1.62  | 0.36 | 1.63  | 0.0127 | 1.06  | 0.7409 | 1.52  | 0.0149 | -1.04 | 0.8685 |
| 92354_at   | 1447945_at   | LOC436061    | similar to Transcription factor Maf (Proto-onc  | 1.3   | 0.15 | -1.15 | 0.5076 | -1.21 | 0.381  | -1.52 | 0.0863 | -1.2  | 0.6843 |
| 92355_at   | 1419012_at   | Zfpm2        | zinc finger protein, multitype 2                | -1.36 | 0.48 | 1.04  | 0.8219 | -1.04 | 0.7988 | 1.1   | 0.4522 | 1.17  | 0.3523 |
| 92356_at   | 1417995_at   | Ptpn22       | protein tyrosine phosphatase, non-receptor t    | 3.62  | 0.26 | 2.35  | 0.2513 | 1.51  | 0.3832 | 2.64  | 0.2248 | 1.87  | 0.3261 |
| 92357_at   | 1423378_at   | Adam23       | a disintegrin and metalloprotease domain 23     | 1.44  | 0.26 | 1.11  | 0.2309 | 1.02  | 0.8787 | 1.11  | 0.3426 | 1.27  | 0.5328 |
| 92358_at   | 1423561_at   | ---          | ---                                             | -1.33 | 0.39 | -1.19 | 0.4093 | -1.11 | 0.6516 | -1.2  | 0.4816 | 2.05  | 0.2133 |
| 92360_at   | 1416861_at   | Stam         | signal transducing adaptor molecule (SH3 d      | 1.04  | 0.75 | 1.12  | 0.0416 | 1.22  | 0.0196 | 1.08  | 0.1546 | 1.22  | 0.1137 |
| 92361_at   | 1450258_a_at | Elavl4       | ELAV (embryonic lethal, abnormal vision, Dr     | -2.4  | 0.39 | 1.65  | 0.2511 | 1.53  | 0.1508 | 1.74  | 0.0786 | 1.19  | 0.6605 |
| 92362_at   | 1418714_at   | Dusp8        | dual specificity phosphatase 8                  | 1.98  | 0.27 | -1.11 | 0.7239 | -1.27 | 0.3405 | -1.43 | 0.169  | 1.16  | 0.5975 |
| 92364_at   | 1422073_a_at | Celsr2       | cadherin EGF LAG seven-pass G-type recej        | -1.76 | 0.23 | 1.42  | 0.1964 | 1.8   | 0.0309 | 1.38  | 0.1078 | 1.26  | 0.6125 |
| 92365_at   | 1449528_at   | Figf         | c-fos induced growth factor                     | 1.81  | 0.09 | 1.25  | 0.0132 | 1.41  | 0.0033 | 1.31  | 0.0342 | 1.07  | 0.8342 |
| 92366_at   | 1426285_at   | Lama2        | laminin, alpha 2                                | 1.1   | 0.8  | -1.09 | 0.6789 | 1.1   | 0.6265 | -1.21 | 0.3406 | -1.1  | 0.8016 |
| 92367_at   | 1427707_a_at | ---          | ---                                             | -1.28 | 0.73 | 1.13  | 0.4402 | 1.17  | 0.1727 | -1.22 | 0.1866 | -1.35 | 0.398  |
| 92368_at   | 1420401_a_at | Ramp3        | receptor (calcitonin) activity modifying protei | 2.27  | 0.01 | -1.61 | 0.169  | -1.76 | 0.1058 | -1.05 | 0.878  | -1.02 | 0.931  |
| 92371_at   | 1419109_at   | Hrc          | histidine rich calcium binding protein          | -1.88 | 0.02 | -1.2  | 0.015  | -1.09 | 0.2299 | -1.22 | 0.0583 | -1.14 | 0.5505 |
| 92374_at   | 1435495_at   | Adora1       | adenosine A1 receptor                           | 2.8   | 0.02 | 3.84  | 0      | 2.69  | 0      | 4.64  | 0      | 1.73  | 0.0154 |
| 92375_at   | 1460703_at   | Ascc1        | activating signal cointegrator 1 complex sub    | 1.4   | 0.25 | -1.11 | 0.0773 | -1.05 | 0.4163 | -1.04 | 0.2814 | 1.21  | 0.1163 |
| 92376_at   | 1420540_a_at | Rit1         | Ras-like without CAAX 1                         | -1.05 | 0.76 | -1.06 | 0.2747 | -1.07 | 0.3102 | 1.02  | 0.7683 | -1.07 | 0.5482 |
| 92377_at   | 1455279_at   | Gm1060       | gene model 1060, (NCBI)                         | -2.04 | 0.06 | -1.18 | 0.564  | 1.07  | 0.8094 | -1.31 | 0.3082 | 3     | 0.0096 |
| 92378_at   | 1427019_at   | Ptpnz1       | protein tyrosine phosphatase, receptor type     | 1.17  | 0.76 | -1.28 | 0.1643 | -1.01 | 0.9622 | -1.5  | 0.0438 | -1.34 | 0.2911 |
| 92380_r_at | 1418690_at   | Ptpnz1       | protein tyrosine phosphatase, receptor type     | -2.94 | 0.15 | 1.07  | 0.8545 | -1.33 | 0.5232 | -1.62 | 0.1379 | 1.25  | 0.5773 |
| 92381_at   | 1420975_at   | Baz1b        | bromodomain adjacent to zinc finger domair      | -1.2  | 0.52 | -1.11 | 0.3583 | -1.04 | 0.8034 | -1.3  | 0.0835 | 1.77  | 0.2636 |
| 92382_at   | 1421120_at   | Myo6         | myosin VI                                       | 1.31  | 0.63 | 1.08  | 0.2797 | 1.15  | 0.1303 | 1.1   | 0.2728 | 1.02  | 0.8764 |
| 92386_at   | 1448629_at   | Hps4         | Hermansky-Pudlak syndrome 4 homolog (hu         | -1.01 | 0.98 | -1.55 | 0.0089 | -1.25 | 0.1217 | -1.41 | 0.0038 | 1.45  | 0.2711 |
| 92387_at   | 1416827_at   | Tbxas1       | thromboxane A synthase 1, platelet              | -1.09 | 0.45 | 1.08  | 0.6445 | -1.08 | 0.5831 | -1.03 | 0.8498 | 1.46  | 0.0364 |
| 92388_at   | 1415710_at   | BC038311     | cDNA sequence BC038311                          | 1.11  | 0.38 | -1.17 | 0.0372 | 1     | 0.9955 | -1.06 | 0.5582 | -1.2  | 0.137  |
| 92389_at   | 1420718_at   | Odz2         | odd Oz/ten-m homolog 2 (Drosophila)             | -1.06 | 0.9  | -1.38 | 0.0518 | -1.26 | 0.0541 | -1.33 | 0.0296 | 1.51  | 0.0684 |
| 92390_at   | 1422992_s_at | ---          | ---                                             | -2.84 | 0.2  | 1.28  | 0.3415 | -1.04 | 0.8637 | 1.04  | 0.9036 | 1.32  | 0.2727 |
| 92392_at   | 1456064_at   | AI504432     | expressed sequence AI504432                     | -1.1  | 0.75 | -1.21 | 0.6391 | -1.17 | 0.6836 | -1.48 | 0.3107 | -1.17 | 0.8086 |
| 92393_at   | 1423018_at   | Kcna3        | potassium voltage-gated channel, shaker-re      | -2.45 | 0.03 | -1.08 | 0.6932 | 1.08  | 0.7273 | -1.18 | 0.2173 | -1.17 | 0.6973 |
| 92395_r_at | 1417173_at   | Crebl1       | cAMP responsive element binding protein-lik     | -1.19 | 0.54 | -1.06 | 0.3584 | -1.07 | 0.3439 | -1.09 | 0.1871 | 1.31  | 0.2134 |
| 92398_at   | 1424380_at   | BC026744     | cDNA sequence BC026744                          | 1.68  | 0.27 | 1.07  | 0.523  | -1.23 | 0.2217 | 1.06  | 0.631  | 1.46  | 0.4637 |
| 92399_at   | 1422864_at   | Runx1        | runt related transcription factor 1             | -1.52 | 0.18 | 1.11  | 0.7499 | -1.09 | 0.7585 | 1.05  | 0.8543 | 1.31  | 0.4728 |
| 92400_at   | 1417931_at   | Ndst2        | N-deacetylase/N-sulfotransferase (heparan       | -1.34 | 0.68 | -1.11 | 0.5895 | 1.06  | 0.7631 | -1.13 | 0.5246 | 1.02  | 0.9522 |
| 92401_at   | 1419692_a_at | Ltc4s        | leukotriene C4 synthase                         | -1.16 | 0.48 | -1.2  | 0.0521 | -1.21 | 0.06   | -1.26 | 0.0268 | 1.47  | 0.1078 |
| 92403_at   | 1449468_at   | St6galnac5   | ST6 (alpha-N-acetyl-neuraminyl-2,3-beta-ga      | -1.48 | 0.46 | -1.12 | 0.5044 | -1.08 | 0.6901 | -1.12 | 0.5194 | 2.39  | 0.0301 |
| 92404_at   | 1420891_at   | Wnt7b        | wingless-related MMTV integration site 7B       | -1.9  | 0.29 | 1.27  | 0.3592 | 1.54  | 0.231  | 1.37  | 0.4404 | 2.22  | 0.0229 |
| 92406_at   | 1419711_at   | Cd7          | CD7 antigen                                     | -1.41 | 0.4  | 1.15  | 0.5434 | -1.06 | 0.7905 | 1.3   | 0.2354 | -1.27 | 0.5601 |
| 92407_at   | 1420693_at   | Myom1        | myomesin 1                                      | 1.07  | 0.79 | -2.12 | 0.3333 | -1.55 | 0.5342 | -1.65 | 0.4767 | -1.35 | 0.5236 |
| 92408_at   | 1438221_at   | C130065N10Ri | RIKEN cDNA C130065N10 gene                      | 1.48  | 0.2  | 1.23  | 0.0606 | 1.14  | 0.3535 | 1.23  | 0.1102 | -1.02 | 0.8716 |
| 92409_at   | 1419164_at   | Zfp260       | zinc finger protein 260                         | 1.23  | 0.13 | 1.13  | 0.2158 | 1.24  | 0.0205 | 1.13  | 0.1081 | -1.32 | 0.136  |
| 92410_at   | 1422964_at   | Rad23a       | RAD23a homolog (S. cerevisiae)                  | 1.25  | 0.68 | -1.02 | 0.8397 | -1.04 | 0.7642 | -1.05 | 0.6264 | -1.11 | 0.7772 |
| 92411_at   | 1433843_at   | Hs1bp3       | HS1 binding protein 3                           | -1.15 | 0.16 | 1     | 0.9723 | 1.11  | 0.0217 | 1.06  | 0.1035 | 1.26  | 0.0493 |
| 92412_s_at | 1427498_a_at | Spag5        | sperm associated antigen 5                      | -2.95 | 0.01 | -1.19 | 0.6769 | -1.63 | 0.2693 | -1.76 | 0.2082 | 2.15  | 0.1995 |
| 92414_at   | 1421172_at   | Adam12       | a disintegrin and metalloproteinase domain      | -1.12 | 0.85 | -1.95 | 0.0513 | -1.45 | 0.2574 | -1.06 | 0.8727 | -1.53 | 0.2548 |
| 92415_at   | 1422924_at   | ---          | ---                                             | 2.04  | 0.46 | -1.1  | 0.6788 | -1.17 | 0.4351 | -1.22 | 0.3728 | -1.67 | 0.3103 |

|            |              |               |                                                 |       |      |       |        |       |        |       |        |       |        |
|------------|--------------|---------------|-------------------------------------------------|-------|------|-------|--------|-------|--------|-------|--------|-------|--------|
| 92416_at   | 1460293_at   | Freq          | frequenin homolog (Drosophila)                  | -2    | 0.06 | -1.14 | 0.669  | 1.11  | 0.7297 | -1.52 | 0.166  | 1.99  | 0.0279 |
| 92417_at   | 1417858_at   | Rasal1        | RAS protein activator like 1 (GAP1 like)        | -1.17 | 0.29 | 1.1   | 0.2994 | 1.03  | 0.7258 | 1.18  | 0.1728 | 1.02  | 0.9085 |
| 92418_at   | 1416263_at   | Abcb9         | ATP-binding cassette, sub-family B (MDR/T,      | 1.04  | 0.91 | 1.04  | 0.6507 | -1.01 | 0.8433 | -1.07 | 0.2782 | 1.48  | 0.0429 |
| 92419_at   | 1419227_at   | Cct6b         | chaperonin subunit 6b (zeta)                    | -1.66 | 0.26 | -1.05 | 0.5828 | -1.05 | 0.5591 | -1.09 | 0.3508 | 1.8   | 0.0499 |
| 92421_at   | 1453113_at   | 2610014F08Rik | RIKEN cDNA 2610014F08 gene                      | 2.42  | 0    | 1.49  | 0.2266 | 2.39  | 0.0002 | 2.42  | 0.0087 | 1.67  | 0.1363 |
| 92422_at   | 1418149_at   | Chga          | chromogranin A                                  | -1.3  | 0.45 | -1.18 | 0.2458 | -1.25 | 0.2285 | -1.13 | 0.3032 | -1.85 | 0.0404 |
| 92423_at   | 1449100_at   | Pard6a        | par-6 (partitioning defective 6,) homolog alpl  | 1.27  | 0.25 | 1.35  | 0.3566 | 1.4   | 0.2505 | 1.42  | 0.1841 | 1.2   | 0.6741 |
| 92426_at   | 1431530_a_at | Tspan5        | tetraspanin 5                                   | -1.11 | 0.57 | 1.14  | 0.2385 | 1.24  | 0.0712 | 1.18  | 0.1634 | 1.32  | 0.1745 |
| 92427_at   | 1420894_at   | Tgfb1         | transforming growth factor, beta receptor I     | -1.8  | 0.58 | 1.13  | 0.5299 | -1.02 | 0.9187 | 1.66  | 0.1445 | -1.66 | 0.087  |
| 92428_at   | 1418292_at   | Asna1         | arsA (bacterial) arsenite transporter, ATP-bi   | 1.16  | 0.74 | -1.03 | 0.5857 | -1.17 | 0.1939 | -1.11 | 0.1912 | -1.17 | 0.1758 |
| 92429_at   | 1422926_at   | Mc2r          | melanocortin 2 receptor                         | -2.02 | 0.26 | -1.28 | 0.5654 | 1.03  | 0.9421 | -1.14 | 0.6691 | 1.53  | 0.0932 |
| 92430_at   | 1424851_at   | Chchd5        | coiled-coil-helix-coiled-coil-helix domain con  | -1.13 | 0.38 | 1.02  | 0.8269 | 1.07  | 0.4218 | 1.01  | 0.885  | 1.23  | 0.331  |
| 92432_at   | 1435202_at   | Zfp574        | zinc finger protein 574                         | -1.24 | 0.66 | -1.83 | 0.0155 | -1.04 | 0.8539 | -1.54 | 0.095  | -1.06 | 0.8832 |
| 92433_at   | 1450804_at   | Kif5c         | kinesin family member 5C                        | -3.82 | 0.22 | 1.04  | 0.8343 | -1.1  | 0.471  | -1.04 | 0.6629 | 1.38  | 0.0937 |
| 92434_at   | 1420707_a_at | Traip         | TRAF-interacting protein                        | -2.47 | 0.35 | 1.31  | 0.2167 | 1.38  | 0.1814 | 1.26  | 0.1855 | 2.62  | 0.1404 |
| 92435_at   | 1418310_a_at | Rlbp1         | retinaldehyde binding protein 1                 | -1.03 | 0.96 | 1.34  | 0.2162 | 1.59  | 0.0184 | 1.3   | 0.2945 | 1.95  | 0.2254 |
| 92436_at   | 1418798_s_at | Stk23         | serine/threonine kinase 23                      | -1.17 | 0.54 | 1.17  | 0.1035 | 1.08  | 0.5893 | 1.07  | 0.4296 | 1.11  | 0.7734 |
| 92437_at   | 1460684_at   | Tm7sf2        | transmembrane 7 superfamily member 2            | 1.03  | 0.78 | -1.55 | 0.0042 | -1.64 | 0.0005 | -2.1  | 0      | -1.39 | 0.1391 |
| 92439_at   | 1452403_a_at | Oc90          | otoconin 90                                     | 1.47  | 0.09 | 1.22  | 0.051  | 1.11  | 0.3458 | 1.25  | 0.0306 | 1.56  | 0.0882 |
| 92440_at   | 1418301_at   | Irf6          | interferon regulatory factor 6                  | -4.3  | 0    | -6.39 | 0      | -1.15 | 0.1897 | -6.45 | 0      | -3.34 | 0.0002 |
| 92441_at   | 1417552_at   | Fap           | fibroblast activation protein                   | -1.56 | 0.21 | 1.27  | 0.4712 | 1.72  | 0.2569 | 1.16  | 0.7072 | 1.42  | 0.3584 |
| 92444_f_at | 1427702_at   | Zfp1          | zinc finger protein 1                           | 1.85  | 0.2  | 1.21  | 0.0071 | -1.15 | 0.0743 | 1.19  | 0.0037 | 1.19  | 0.3681 |
| 92449_at   | 1423007_a_at | Gfra2         | glial cell line derived neurotrophic factor fam | -2.53 | 0.37 | -1.26 | 0.5689 | -1.12 | 0.8076 | 1.07  | 0.8774 | 1.28  | 0.3045 |
| 92450_at   | 1417446_at   | Slc12a4       | solute carrier family 12, member 4              | -1.43 | 0.33 | 1.31  | 0.0314 | 1.46  | 0.0069 | 1.32  | 0.033  | 1.29  | 0.2678 |
| 92454_at   | 1422899_at   | Slc6a20       | solute carrier family 6 (neurotransmitter tran  | -1.6  | 0.07 | -1.17 | 0.3442 | -1.08 | 0.6513 | -1.56 | 0.0427 | 1.12  | 0.349  |
| 92455_at   | 1450469_at   | MGI:1929713   | testis specific protein, Ddc8                   | -3.02 | 0.12 | -1.75 | 0.0992 | -1.95 | 0.0552 | -2.05 | 0.0467 | 1.25  | 0.2617 |
| 92456_at   | 1423483_s_at | ---           | ---                                             | 3.5   | 0.01 | 1.3   | 0.3537 | 1.15  | 0.6649 | 1.63  | 0.1448 | -1.63 | 0.3919 |
| 92457_at   | 1452473_at   | E130201N16Rik | RIKEN cDNA E130201N16 gene                      | 1.62  | 0.02 | -1.05 | 0.8063 | 1.32  | 0.2921 | -1.3  | 0.181  | 1.05  | 0.8948 |
| 92458_at   | 1422663_at   | Orc1l         | origin recognition complex, subunit 1-like (S,  | -1.41 | 0.35 | -1.02 | 0.9243 | -1.04 | 0.9119 | 1.04  | 0.8254 | 1.29  | 0.254  |
| 92459_at   | 1419684_at   | Ccl8          | chemokine (C-C motif) ligand 8                  | -2.63 | 0.21 | -1.16 | 0.2618 | -1.13 | 0.3075 | 1.21  | 0.3281 | 1.37  | 0.1235 |
| 92460_at   | 1419328_at   | Sema4f        | sema domain, immunoglobulin domain (Ig),        | -1.43 | 0.12 | -1.03 | 0.666  | -1.08 | 0.2225 | -1.08 | 0.29   | 1.54  | 0.0304 |
| 92461_at   | 1448598_at   | Mmp17         | matrix metalloproteinase 17                     | -1.14 | 0.44 | 1.22  | 0.2821 | 1.16  | 0.2729 | 1.16  | 0.3727 | -1.06 | 0.8645 |
| 92462_at   | 1460286_at   | 6-Sep         | septin 6                                        | 2.15  | 0.16 | 1.24  | 0.5949 | 1.52  | 0.2646 | 1.44  | 0.2114 | -1.34 | 0.4588 |
| 92465_at   | 1421170_a_at | Plcb1         | phospholipase C, beta 1                         | -3.23 | 0.1  | 1.04  | 0.8335 | 1.02  | 0.8988 | 1.17  | 0.4032 | -1.49 | 0.3213 |
| 92467_g_at | 1425782_at   | Plcb1         | phospholipase C, beta 1                         | -1.62 | 0.5  | -1.03 | 0.8352 | -1.28 | 0.2351 | -1.34 | 0.1073 | -1.17 | 0.5936 |
| 92468_at   | 1423421_at   | MGI:1930842   | globin inducing factor, fetal                   | 2.96  | 0.02 | 1.25  | 0.0359 | -1    | 0.9696 | 1.37  | 0.0046 | 1.57  | 0.2804 |
| 92469_at   | 1451031_at   | Sfrp4         | secreted frizzled-related sequence protein 4    | -1.11 | 0.81 | -1.49 | 0.246  | -1.04 | 0.8954 | -1.31 | 0.3254 | 2.14  | 0.0625 |
| 92472_f_at | 1450165_at   | Slfn2         | schlafen 2                                      | 2.03  | 0.22 | 1.9   | 0.1025 | 1.24  | 0.3432 | 1.9   | 0.1702 | 1.23  | 0.7554 |
| 92473_at   | 1449029_at   | Mknk2         | MAP kinase-interacting serine/threonine kin     | -1.19 | 0.36 | 1.02  | 0.8395 | -1.03 | 0.8749 | -1.02 | 0.8987 | 1.09  | 0.7829 |
| 92476_at   | 1449288_at   | Gdf3          | growth differentiation factor 3                 | 1.26  | 0.63 | 1.13  | 0.5871 | 1.04  | 0.5715 | -1.16 | 0.1468 | 1.57  | 0.1549 |
| 92478_at   | 1421939_a_at | Stag1         | stromal antigen 1                               | 1.91  | 0.11 | -1.05 | 0.7312 | -1.08 | 0.5448 | 1.03  | 0.81   | -1.01 | 0.9903 |
| 92480_f_at | 1449414_at   | Zfp53         | zinc finger protein 53                          | 1.12  | 0.64 | 1.45  | 0.044  | 1.36  | 0.157  | 1.53  | 0.0163 | -1.14 | 0.5705 |
| 92481_at   | 1422747_at   | Chek2         | CHK2 checkpoint homolog (S. pombe)              | -1.02 | 0.95 | -1.06 | 0.4992 | -1.1  | 0.1951 | -1.17 | 0.0815 | 1.37  | 0.0111 |
| 92483_g_at | 1450212_at   | Fmn1          | formin-like 1                                   | -2.62 | 0.29 | -1.39 | 0.4038 | -1.53 | 0.3103 | 1.42  | 0.3871 | -1.03 | 0.9273 |
| 92484_at   | 1422018_at   | Hivep2        | human immunodeficiency virus type I enhan       | -1.24 | 0.43 | 1.11  | 0.4713 | -1.3  | 0.055  | 1.15  | 0.2964 | -1.9  | 0.0593 |
| 92485_at   | 1450210_at   | Bmp15         | bone morphogenetic protein 15                   | -3.25 | 0.24 | -1.12 | 0.6875 | -1.27 | 0.4161 | -1.51 | 0.0499 | 1.4   | 0.583  |
| 92486_at   | 1449215_at   | Slc22a21      | solute carrier family 22 (organic cation transp | 1.17  | 0.73 | -1.04 | 0.7155 | 1.06  | 0.6164 | -1.08 | 0.4689 | 1.02  | 0.9341 |
| 92487_at   | 1416564_at   | Sox7          | SRY-box containing gene 7                       | 1.77  | 0.13 | -1.35 | 0.0009 | -1.08 | 0.4175 | -1.13 | 0.3336 | -1.19 | 0.4183 |
| 92488_at   | 1449297_at   | Casp12        | caspase 12                                      | -2.01 | 0.05 | 1.15  | 0.6136 | 1.1   | 0.5407 | 1.22  | 0.1081 | -1.07 | 0.8829 |
| 92489_at   | 1449988_at   | Gimap1        | GTPase, IMAP family member 1                    | 1.6   | 0.09 | 1.24  | 0.067  | 1.34  | 0.0514 | 1.09  | 0.5184 | 1.09  | 0.5955 |
| 92490_at   | 1420395_a_at | Kif9          | kinesin family member 9                         | -1.21 | 0.3  | -1.01 | 0.9662 | 1.2   | 0.583  | -1.25 | 0.2827 | 1.05  | 0.8173 |
| 92493_at   | 1450433_at   | Rbpsuhl       | recombining binding protein suppressor of h     | 1.04  | 0.92 | -1.19 | 0.182  | -1.01 | 0.9386 | 1.01  | 0.9351 | 1.25  | 0.0408 |
| 92494_at   | 1449426_a_at | Anxa10        | annexin A10                                     | 1.82  | 0.2  | -1.08 | 0.8731 | -1.17 | 0.6425 | -1.77 | 0.143  | 1.15  | 0.6073 |

|            |              |         |                                                 |       |      |       |        |       |        |       |        |       |        |
|------------|--------------|---------|-------------------------------------------------|-------|------|-------|--------|-------|--------|-------|--------|-------|--------|
| 92495_at   | 1420999_at   | Cnot4   | CCR4-NOT transcription complex, subunit 4       | 1.01  | 0.91 | 1.08  | 0.3881 | -1.07 | 0.4601 | -1.1  | 0.2817 | 1.23  | 0.0096 |
| 92496_at   | 1430522_a_at | Vamp5   | vesicle-associated membrane protein 5           | 2.52  | 0.05 | 1.28  | 0.131  | 1.58  | 0.0304 | 1.85  | 0.0077 | 1.92  | 0.2409 |
| 92497_at   | 1417639_at   | Slc22a4 | solute carrier family 22 (organic cation transp | 2.54  | 0.23 | 1.77  | 0.0462 | 1.84  | 0.1941 | 1.96  | 0.0884 | 1.05  | 0.7493 |
| 92498_at   | 1417757_at   | Unc13b  | unc-13 homolog B (C. elegans)                   | -1.07 | 0.91 | 1.02  | 0.9083 | -1.04 | 0.7256 | 1.09  | 0.5407 | 1.96  | 0.0856 |
| 92499_at   | 1419633_at   | Uncx4.1 | Unc4.1 homeobox (C. elegans)                    | -1.42 | 0.17 | -1.55 | 0.1772 | 1.48  | 0.0966 | -1.07 | 0.8344 | 2.29  | 0.0178 |
| 92500_at   | 1449315_at   | Odz3    | odd Oz/ten-m homolog 3 (Drosophila)             | 2.82  | 0.01 | 1.46  | 0.0052 | 1.29  | 0.0475 | 1.35  | 0.0327 | 1.12  | 0.4391 |
| 92501_s_at | 1450533_a_at | Plagl1  | pleiomorphic adenoma gene-like 1                | 2.05  | 0.11 | 1.38  | 0.0668 | 1.09  | 0.2504 | 1.87  | 0.1146 | 1.34  | 0.2142 |
| 92503_at   | 1418308_at   | Hus1    | Hus1 homolog (S. pombe)                         | 1.14  | 0.57 | -1.21 | 0.0217 | -1.31 | 0.0131 | -1.29 | 0.0372 | -1.08 | 0.8004 |
| 92505_g_at | 1425366_a_at | Hus1    | Hus1 homolog (S. pombe)                         | -1.35 | 0.37 | 1.08  | 0.6925 | 1.08  | 0.6778 | -1.11 | 0.6117 | 2.36  | 0.2463 |
| 92506_at   | 1426294_at   | Hapln1  | hyaluronan and proteoglycan link protein 1      | -1.46 | 0.6  | -1.7  | 0.0985 | -1.83 | 0.03   | -1.01 | 0.9662 | 3.41  | 0.1657 |
| 92508_s_at | 1427569_a_at | Utrn    | utrophin                                        | -2.33 | 0.22 | -1.37 | 0.1528 | -1.44 | 0.0854 | -1.37 | 0.1082 | -1.29 | 0.4933 |
| 92509_at   | 1420496_at   | F12     | coagulation factor XII (Hageman factor)         | -1.27 | 0.09 | -1.2  | 0.0026 | 1.08  | 0.241  | -1.25 | 0.0047 | -2.01 | 0.0004 |
| 92510_at   | 1426431_at   | Jag2    | jagged 2                                        | 1.11  | 0.57 | -1.1  | 0.3529 | -1.06 | 0.5701 | -1.14 | 0.2148 | -1.1  | 0.6684 |
| 92512_g_at | 1421666_a_at | Aanat   | arylalkylamine N-acetyltransferase              | -1.28 | 0.42 | -1.01 | 0.9109 | 1.01  | 0.9043 | -1.18 | 0.0736 | 1.24  | 0.1771 |
| 92514_at   | 1423342_at   | Barx1   | BarH-like homeobox 1                            | -2.6  | 0.01 | -1.5  | 0.0565 | -1.6  | 0.0405 | -1.42 | 0.0862 | 1.85  | 0.1085 |
| 92515_at   | 1422720_at   | Isl1    | ISL1 transcription factor, LIM/homeodomain      | -1.5  | 0.11 | -1.07 | 0.4692 | 1.06  | 0.6498 | 1.06  | 0.7265 | -1.03 | 0.9121 |
| 92516_at   | 1422044_at   | Ndst1   | N-deacetylase/N-sulfotransferase (heparan       | -1.03 | 0.9  | -1.41 | 0.1702 | -2.43 | 0.0135 | -3.41 | 0.0061 | -2.16 | 0.425  |
| 92517_at   | 1423540_at   | Rbms2   | RNA binding motif, single stranded interactir   | 1.15  | 0.42 | -1.31 | 0.0001 | -1.16 | 0.0529 | -1.42 | 0      | -1.7  | 0.0875 |
| 92519_at   | 1422744_at   | Phka1   | phosphorylase kinase alpha 1                    | -1.1  | 0.83 | -1.11 | 0.2169 | -1.03 | 0.7557 | -1.15 | 0.0836 | 1.08  | 0.5803 |
| 92520_at   | 1446914_at   | C80425  | expressed sequence C80425                       | 1.64  | 0.25 | 1.1   | 0.741  | 1.73  | 0.0162 | -1.14 | 0.5981 | 1.91  | 0.3204 |
| 92521_at   | 1420649_at   | Atbf1   | AT motif binding factor 1                       | 1.02  | 0.9  | 1.17  | 0.0213 | -1    | 0.9734 | 1.15  | 0.0579 | 1.47  | 0.0937 |
| 92522_at   | 1451808_at   | Kcnj4   | potassium inwardly-rectifying channel, subfa    | -1.28 | 0.1  | -1.11 | 0.3541 | -1    | 0.989  | -1.1  | 0.3834 | 1.38  | 0.0304 |
| 92523_at   | 1451868_at   | Kcnj6   | potassium inwardly-rectifying channel, subfa    | -1.84 | 0.3  | 1.07  | 0.7553 | -1.02 | 0.9265 | -1.23 | 0.4179 | 1.38  | 0.1637 |
| 92524_at   | 1421581_at   | Kcnj6   | potassium inwardly-rectifying channel, subfa    | 1.95  | 0.28 | -1.17 | 0.6452 | 1.01  | 0.9672 | -1.35 | 0.3111 | -1.44 | 0.525  |
| 92525_i_at | 1429582_at   | Btbd14a | BTB (POZ) domain containing 14A                 | 1.42  | 0.49 | 1.32  | 0.1783 | 1.18  | 0.2985 | 1.31  | 0.0652 | 1.41  | 0.5479 |
| 92527_at   | 1418586_at   | Adcy9   | adenylate cyclase 9                             | 1.26  | 0.1  | 1.47  | 0.0001 | 1.2   | 0.0923 | 1.56  | 0.0031 | 1.59  | 0.0018 |
| 92528_at   | 1455363_at   | Bai1    | brain-specific angiogenesis inhibitor 1         | -1.11 | 0.86 | 1.26  | 0.032  | 1.14  | 0.086  | 1.1   | 0.4007 | 1.27  | 0.2638 |
| 92529_s_at | 1421721_a_at | Arnt    | aryl hydrocarbon receptor nuclear translocat    | -1.36 | 0.46 | -1    | 0.9857 | -1.12 | 0.109  | 1.02  | 0.8291 | -1.14 | 0.3818 |
| 92531_at   | 1455698_at   | Tloc1   | translocation protein 1                         | -1.61 | 0.05 | -1.36 | 0.0526 | -1.05 | 0.6908 | -1.51 | 0.0122 | -1.77 | 0.0874 |
| 92532_at   | 1418603_at   | Avpr1a  | arginine vasopressin receptor 1A                | -1.32 | 0.29 | -1.33 | 0.0068 | -1.05 | 0.4984 | -1.51 | 0.0005 | 1.35  | 0.0966 |
| 92533_at   | 1427355_at   | Calca   | calcitonin/calcitonin-related polypeptide, alpl | -2.2  | 0.12 | -1.09 | 0.4816 | 1.3   | 0.1233 | 1.09  | 0.4637 | -1.27 | 0.4757 |
| 92534_at   | 1426063_a_at | Gem     | GTP binding protein (gene overexpressed in      | -1.63 | 0.69 | -1.12 | 0.7843 | 1.23  | 0.5599 | -1.17 | 0.7086 | -1.23 | 0.731  |
| 92535_at   | 1416302_at   | Ebf1    | early B-cell factor 1                           | -2.62 | 0.35 | 1.49  | 0.1393 | -1.15 | 0.2742 | -1.09 | 0.4902 | 2.13  | 0.054  |
| 92537_g_at | 1455918_at   | ---     | ---                                             | -1.11 | 0.85 | 1.06  | 0.7685 | -1.65 | 0.0274 | -1.03 | 0.8925 | 6.69  | 0.0011 |
| 92539_at   | 1416762_at   | S100a10 | S100 calcium binding protein A10 (calpactin     | -2.25 | 0.14 | -2.43 | 0.0001 | -1.26 | 0.0695 | -2.9  | 0      | -6.67 | 0.001  |
| 92540_f_at | 1421260_a_at | Srm     | spermidine synthase                             | -1.12 | 0.13 | -1.27 | 0.0046 | -1.13 | 0.2072 | -1.13 | 0.2037 | 1.01  | 0.9555 |
| 92541_at   | 1452651_a_at | Myl1    | myosin, light polypeptide 1                     | -1.97 | 0.03 | -2.93 | 0.1166 | -2.55 | 0.1538 | -3.25 | 0.0997 | -1.04 | 0.7784 |
| 92543_at   | 1460636_at   | Map2k2  | Mitogen activated protein kinase kinase 2       | 1.17  | 0.1  | 1.06  | 0.3097 | -1.06 | 0.3625 | 1.12  | 0.0659 | 1.33  | 0.0433 |
| 92544_f_at | 1448442_a_at | Psm3    | proteasome (prosome, macropain) subunit,        | -1.11 | 0.53 | 1.05  | 0.5067 | 1.01  | 0.8488 | 1.02  | 0.6446 | -1.11 | 0.4377 |
| 92546_r_at | 1423860_at   | Ptgds   | prostaglandin D2 synthase (brain)               | -1.2  | 0.06 | -1.03 | 0.6972 | 1.34  | 0.0803 | -1.17 | 0.028  | 1.12  | 0.4737 |
| 92547_at   | 1417186_at   | Hip2    | huntingtin interacting protein 2                | 1.23  | 0.2  | 1.14  | 0.0687 | 1.06  | 0.618  | 1.1   | 0.1329 | -1.04 | 0.8257 |
| 92549_at   | 1423945_a_at | Pkig    | protein kinase inhibitor, gamma                 | -1.15 | 0.27 | -1.08 | 0.2069 | -1.01 | 0.8619 | 1.01  | 0.9377 | 1.06  | 0.5765 |
| 92550_at   | 1417156_at   | Krt1-19 | keratin complex 1, acidic, gene 19              | 2.68  | 0.09 | -1.85 | 0.1551 | 1.18  | 0.8377 | -1.8  | 0.1741 | 1.31  | 0.3689 |
| 92551_at   | 1416641_at   | Lig1    | ligase I, DNA, ATP-dependent                    | 3.47  | 0.06 | 2.74  | 0.0046 | 1.39  | 0.3933 | 3.3   | 0      | 1.62  | 0.2036 |
| 92553_at   | 1417825_at   | Esd     | esterase D/formylglutathione hydrolase          | 1.34  | 0.31 | 1.09  | 0.1039 | 1.03  | 0.732  | 1.14  | 0.0593 | -1.15 | 0.1152 |
| 92554_at   | 1422887_a_at | Ctbp2   | C-terminal binding protein 2                    | 1.43  | 0.08 | 1.02  | 0.8058 | -1.04 | 0.7295 | 1.05  | 0.5854 | 1.37  | 0.1411 |
| 92555_at   | 1448501_at   | Tspan6  | tetraspanin 6                                   | 2.21  | 0.11 | 1.94  | 0.2623 | 1.06  | 0.7186 | 1.52  | 0.1459 | 2.27  | 0.0799 |
| 92556_at   | 1417085_at   | Akr1c6  | aldo-keto reductase family 1, member C6         | -1.19 | 0.21 | 1.04  | 0.3698 | 1.05  | 0.3922 | -1.05 | 0.2977 | -1.05 | 0.5082 |
| 92557_at   | 1449392_at   | Hsd17b1 | hydroxysteroid (17-beta) dehydrogenase 1        | -2.54 | 0    | 1.59  | 0.0073 | 1.13  | 0.472  | 1.08  | 0.6558 | 1.02  | 0.9511 |
| 92558_at   | 1448162_at   | Vcam1   | vascular cell adhesion molecule 1               | 1.53  | 0.16 | 1.5   | 0.221  | 1.3   | 0.0197 | 1.9   | 0.114  | 2.13  | 0.0032 |
| 92560_g_at | 1451314_a_at | Vcam1   | vascular cell adhesion molecule 1               | -2.37 | 0.13 | 1.28  | 0.42   | -1.05 | 0.8349 | 1.61  | 0.292  | 1.74  | 0.2995 |
| 92561_at   | 1451765_a_at | Entpd5  | ectonucleoside triphosphate diphosphohydr       | 1.97  | 0.17 | 1.08  | 0.4324 | -1.08 | 0.3607 | 1.09  | 0.1881 | -1.41 | 0.1735 |
| 92562_at   | 1416543_at   | Nfe2l2  | nuclear factor, erythroid derived 2, like 2     | 1.01  | 0.92 | 1.1   | 0.0766 | 1.16  | 0.1411 | 1.06  | 0.2543 | -1.16 | 0.4279 |

|            |              |                |                                                  |       |      |       |        |       |        |       |        |        |        |
|------------|--------------|----------------|--------------------------------------------------|-------|------|-------|--------|-------|--------|-------|--------|--------|--------|
| 92563_at   | 1448487_at   | Lrrfip1        | leucine rich repeat (in FLII) interacting protei | -1.3  | 0.62 | 1.02  | 0.8678 | 1.3   | 0.071  | 1.25  | 0.1079 | 1.07   | 0.8272 |
| 92564_at   | 1433842_at   | Lrrfip1        | leucine rich repeat (in FLII) interacting protei | 1.65  | 0.05 | 1.09  | 0.5996 | 1.04  | 0.8103 | 1.21  | 0.0508 | 1.26   | 0.0626 |
| 92565_at   | 1416095_x_at | 1110005A23Rik  | RIKEN cDNA 1110005A23 gene                       | 1.6   | 0.1  | 1.03  | 0.5746 | 1     | 0.9661 | 1.01  | 0.9169 | -1.08  | 0.5463 |
| 92567_at   | 1422437_at   | Col5a2         | procollagen, type V, alpha 2                     | 1.02  | 0.91 | 1.36  | 0.1331 | 1.33  | 0.1115 | 1.68  | 0.0966 | -1.39  | 0.3688 |
| 92571_at   | 1416146_at   | Hspa4          | heat shock protein 4                             | 2.28  | 0.12 | 1.12  | 0.1854 | 1.22  | 0.0727 | 1.26  | 0.0356 | -1.18  | 0.2373 |
| 92573_at   | 1438174_x_at | Ppp2r1a        | Protein phosphatase 2 (formerly 2A), regula      | -1.65 | 0.02 | 1.11  | 0.0371 | 1     | 0.9744 | 1.15  | 0.0472 | -1.03  | 0.8225 |
| 92574_at   | 1428235_at   | Sdhd           | succinate dehydrogenase complex, subunit         | 1.48  | 0.07 | 1.05  | 0.5429 | 1.41  | 0.0034 | 1.16  | 0.214  | 1.41   | 0.0004 |
| 92575_at   | 1423128_at   | Aip            | aryl-hydrocarbon receptor-interacting proteir    | 1.06  | 0.64 | 1.01  | 0.8762 | -1.01 | 0.8804 | 1.06  | 0.2814 | 1.39   | 0.0114 |
| 92577_f_at | 1453729_a_at | Rpl37          | ribosomal protein L37                            | 1.29  | 0.06 | 1.22  | 0.0036 | 1.16  | 0.0005 | 1.29  | 0      | 1.34   | 0.0579 |
| 92578_at   | 1416486_at   | Scye1          | small inducible cytokine subfamily E, membe      | 1.4   | 0.08 | -1.09 | 0.1272 | 1.09  | 0.2435 | 1.01  | 0.8608 | -1.02  | 0.8744 |
| 92579_at   | 1416423_x_at | Ssb            | Sjogren syndrome antigen B                       | 1.35  | 0.28 | 1.37  | 0.0474 | 1.1   | 0.664  | 1.45  | 0.0021 | -1.05  | 0.8148 |
| 92580_at   | 1417024_at   | Hars           | histidyl-tRNA synthetase                         | 1.87  | 0.25 | 1.27  | 0.0272 | 1.11  | 0.3665 | 1.27  | 0.0158 | 1.19   | 0.4531 |
| 92581_at   | 1415984_at   | Acadm          | acetyl-Coenzyme A dehydrogenase, mediu           | 1.39  | 0.01 | 1.59  | 0.0009 | 1.27  | 0.0525 | 1.57  | 0.0007 | 1.42   | 0.0004 |
| 92582_at   | 1416629_at   | Slc1a5         | solute carrier family 1 (neutral amino acid tra  | -1.19 | 0.17 | 1.12  | 0.4842 | 1.18  | 0.2859 | 1.22  | 0.1378 | -1.21  | 0.6512 |
| 92583_at   | 1423867_at   | Serpina3k      | serine (or cysteine) proteinase inhibitor, clac  | -1.65 | 0.35 | -6.2  | 0      | -1.19 | 0.4827 | -6.85 | 0      | -10.04 | 0.0118 |
| 92584_at   | 1424416_at   | Nkiras2        | NFKB inhibitor interacting Ras-like protein 2    | -1.36 | 0.42 | -1.08 | 0.1579 | -1    | 0.9463 | -1.11 | 0.1347 | 1.4    | 0.0543 |
| 92585_at   | 1416351_at   | Map2k1         | mitogen activated protein kinase kinase 1        | 1.01  | 0.98 | 1.11  | 0.1857 | -1.07 | 0.3326 | 1.18  | 0.0245 | -1.13  | 0.3428 |
| 92586_at   | 1448253_at   | Glud1          | glutamate dehydrogenase 1                        | -1.36 | 0.29 | 1.2   | 0.02   | 1.19  | 0.028  | 1.15  | 0.0168 | -1.19  | 0.0664 |
| 92587_at   | 1449108_at   | Fdx1           | ferredoxin 1                                     | 1.15  | 0.31 | -1.01 | 0.8576 | -1.17 | 0.1251 | 1.01  | 0.92   | 1.05   | 0.7218 |
| 92589_at   | 1415673_at   | Psph           | phosphoserine phosphatase                        | -1.56 | 0.01 | 1.03  | 0.6433 | 1.03  | 0.6474 | 1.01  | 0.8453 | 1.07   | 0.7498 |
| 92590_at   | 1431833_a_at | Hmgcs2         | 3-hydroxy-3-methylglutaryl-Coenzyme A syr        | 1.15  | 0.45 | -1.15 | 0.2526 | 1.12  | 0.0817 | -1.32 | 0.0079 | -1.24  | 0.0432 |
| 92593_at   | 1423606_at   | Postn          | periostin, osteoblast specific factor            | 2.46  | 0.02 | 1.3   | 0.0871 | 1.31  | 0.0603 | 1.27  | 0.0047 | 1.11   | 0.639  |
| 92595_r_at | 1449181_at   | Fech           | ferrochelatase                                   | -1.04 | 0.82 | 1.18  | 0.2363 | 1.15  | 0.5191 | 1.47  | 0.0147 | 1.4    | 0.2141 |
| 92596_at   | 1452047_at   | Cacybp         | calcyclin binding protein                        | 1.48  | 0.06 | -1.14 | 0.1406 | -1.02 | 0.8975 | -1.11 | 0.194  | -1.31  | 0.1266 |
| 92597_s_at | 1419883_s_at | Atp6v1b2       | ATPase, H+ transporting, V1 subunit B, isof      | -1.65 | 0.15 | 1.08  | 0.5699 | 1.1   | 0.352  | 1.17  | 0.21   | 1.4    | 0.095  |
| 92598_at   | 1415814_at   | Atp6v1b2       | ATPase, H+ transporting, V1 subunit B, isof      | 1.19  | 0.46 | 1.15  | 0.0593 | 1.16  | 0.0731 | 1.21  | 0.0115 | 1.19   | 0.0284 |
| 92599_at   | 1418373_at   | Pgam2          | phosphoglycerate mutase 2                        | -2.79 | 0.27 | -3.34 | 0.2534 | -4.13 | 0.218  | -4.03 | 0.2214 | 1.38   | 0.1866 |
| 92600_f_at | 1424853_s_at | Cyp4a10 /// BC | cytochrome P450, family 4, subfamily a, pol      | 1.76  | 0.16 | 1.68  | 0.0217 | 2.08  | 0      | 2.01  | 0.0117 | 3.86   | 0.0011 |
| 92601_at   | 1415777_at   | Pnlipr1        | pancreatic lipase related protein 1              | -1.06 | 0.76 | 1.35  | 0.0551 | -1.04 | 0.8408 | 1.04  | 0.8458 | 1.56   | 0.3776 |
| 92602_at   | 1423145_a_at | Tcap           | titin-cap                                        | -1.33 | 0.36 | -1.1  | 0.7979 | -1.42 | 0.348  | -1.71 | 0.1972 | -1.15  | 0.7651 |
| 92603_at   | 1415671_at   | Atp6v0d1       | ATPase, H+ transporting, V0 subunit D isofc      | 1.37  | 0.07 | -1.15 | 0.0194 | 1.02  | 0.7177 | -1.04 | 0.4051 | -1.3   | 0.067  |
| 92605_at   | 1456306_a_at | ---            | ---                                              | -2.16 | 0.3  | -1.44 | 0.1484 | 1.05  | 0.8583 | 1.59  | 0.2758 | 1.34   | 0.4446 |
| 92607_at   | 1423294_at   | Mest           | mesoderm specific transcript                     | 1.51  | 0.32 | 1.31  | 0.0311 | 1.38  | 0.0546 | 1.46  | 0.0233 | 2.6    | 0.0147 |
| 92608_at   | 1425811_a_at | Csrp1          | cysteine and glycine-rich protein 1              | 1.58  | 0.1  | 1.34  | 0.165  | -1.15 | 0.5155 | 1.49  | 0.0392 | 1.8    | 0.0276 |
| 92610_at   | 1450705_at   | Rdbp           | RD RNA-binding protein                           | 1.19  | 0.48 | 1.03  | 0.7636 | 1.02  | 0.8906 | 1.25  | 0.082  | 1.44   | 0.0814 |
| 92611_at   | 1448347_a_at | Gpiap1         | GPI-anchored membrane protein 1                  | 1.12  | 0.81 | -1.4  | 0.0003 | -1.5  | 0.0001 | -1.33 | 0.0022 | -1.7   | 0.0923 |
| 92612_at   | 1449112_at   | Slc27a5        | solute carrier family 27 (fatty acid transporte  | -1    | 0.99 | 1.07  | 0.2224 | -1.07 | 0.1963 | 1.06  | 0.3727 | -1.03  | 0.7885 |
| 92614_at   | 1416630_at   | Id3            | inhibitor of DNA binding 3                       | -1.7  | 0.23 | -1.04 | 0.6296 | -1.07 | 0.4504 | -1.05 | 0.5376 | -1.27  | 0.281  |
| 92615_at   | 1434057_at   | Gm137          | gene model 137, (NCBI)                           | -1.11 | 0.77 | 1.06  | 0.2798 | 1.12  | 0.0186 | 1.08  | 0.1252 | -1.09  | 0.4337 |
| 92616_at   | 1448116_at   | Ube1x          | ubiquitin-activating enzyme E1, Chr X            | -1.02 | 0.94 | 1.08  | 0.2123 | 1.03  | 0.6035 | 1.03  | 0.5473 | -1.51  | 0.0097 |
| 92617_at   | 1450285_at   | Ube1y1         | ubiquitin-activating enzyme E1, Chr Y 1          | 2.07  | 0.13 | 1     | 0.9984 | 1.09  | 0.7796 | 1.28  | 0.333  | 1.49   | 0.062  |
| 92618_at   | 1455236_x_at | Serf2          | small EDRK-rich factor 2                         | -2.55 | 0.17 | 1.1   | 0.43   | -1.1  | 0.5191 | -1.14 | 0.2853 | 1.37   | 0.5589 |
| 92619_at   | 1449441_a_at | Wbp1           | WW domain binding protein 1                      | -1.65 | 0.07 | -1.03 | 0.7269 | -1.13 | 0.3269 | -1.13 | 0.3171 | -1.19  | 0.4918 |
| 92621_at   | 1421743_a_at | Pcbp2          | poly(rC) binding protein 2                       | 1.22  | 0.28 | 1.28  | 0.0023 | 1.16  | 0.0986 | 1.38  | 0      | 1.18   | 0.2912 |
| 92622_at   | 1431284_a_at | 2210013K02Rik  | RIKEN cDNA 2210013K02 gene                       | -1.16 | 0.42 | -1.11 | 0.3219 | -1.13 | 0.2055 | -1.24 | 0.011  | 1.04   | 0.6897 |
| 92625_at   | 1448808_a_at | Nme2           | expressed in non-metastatic cells 2, protein     | 1.07  | 0.48 | 1.1   | 0.0049 | 1.1   | 0.0388 | 1.03  | 0.6534 | 1.04   | 0.6932 |
| 92626_at   | 1415919_at   | Npdc1          | neural proliferation, differentiation and contr  | -1.55 | 0.47 | -1.01 | 0.9214 | 1.25  | 0.0279 | 1.02  | 0.8233 | 1.12   | 0.4142 |
| 92628_at   | 1416520_x_at | Rpl36          | ribosomal protein L36                            | 1.16  | 0.2  | 1.28  | 0.0001 | 1.37  | 0.0011 | 1.4   | 0.0001 | 1.9    | 0.005  |
| 92630_r_at | 1419964_s_at | Hdgf           | hepatoma-derived growth factor                   | -1.38 | 0.35 | 1.07  | 0.5654 | 1.03  | 0.812  | -1.06 | 0.6044 | 1.21   | 0.4557 |
| 92632_at   | 1426710_at   | Calm3          | calmodulin 3                                     | -1.19 | 0.7  | -1.06 | 0.3942 | -1.05 | 0.6322 | -1.1  | 0.3025 | -1.1   | 0.6146 |
| 92633_at   | 1417870_x_at | Ctsz           | cathepsin Z                                      | 1.44  | 0.39 | 1.08  | 0.2528 | 1.41  | 0.0002 | 1.19  | 0.0244 | 1.36   | 0.2379 |
| 92634_at   | 1441342_at   | Dpp4           | Dipeptidylpeptidase 4                            | -1.34 | 0.15 | -1.27 | 0.0288 | 1.1   | 0.2965 | -1.3  | 0.0039 | -1.12  | 0.2433 |
| 92636_f_at | 1423090_x_at | Sec61g         | SEC61, gamma subunit                             | -1.02 | 0.9  | 1.03  | 0.6755 | 1.21  | 0.0603 | 1.19  | 0.0052 | -1.36  | 0.1729 |

|            |              |                   |                                                 |       |      |       |        |       |        |       |        |       |        |
|------------|--------------|-------------------|-------------------------------------------------|-------|------|-------|--------|-------|--------|-------|--------|-------|--------|
| 92637_at   | 1450269_a_at | Pfkl              | phosphofructokinase, liver, B-type              | 1.21  | 0.28 | 1.17  | 0.0063 | -1.03 | 0.6579 | 1.01  | 0.8942 | 1.26  | 0.0503 |
| 92638_at   | 1456390_at   | Ppp2ca            | protein phosphatase 2a, catalytic subunit, al   | -1.04 | 0.84 | 1.25  | 0.1105 | 1.16  | 0.5488 | 1.23  | 0.1462 | 1.24  | 0.0405 |
| 92639_at   | 1424511_at   | Aurka             | aurora kinase A                                 | -1.05 | 0.87 | -1.14 | 0.548  | -1.36 | 0.2691 | 1.31  | 0.1444 | 1.37  | 0.4906 |
| 92640_at   | 1415783_at   | Vps35             | vacuolar protein sorting 35                     | 1.22  | 0.02 | 1.07  | 0.4866 | 1.06  | 0.661  | 1.08  | 0.3028 | 1.04  | 0.8028 |
| 92642_at   | 1448752_at   | Car2              | carbonic anhydrase 2                            | -1.11 | 0.66 | -1.77 | 0      | 1.69  | 0.0051 | -1.03 | 0.7148 | 1.32  | 0.1237 |
| 92643_at   | 1421820_a_at | Nf2               | neurofibromatosis 2                             | 1.09  | 0.58 | -1    | 0.961  | -1.02 | 0.838  | -1.05 | 0.5322 | -1.1  | 0.539  |
| 92644_s_at | 1450194_a_at | Myb               | myeloblastosis oncogene                         | 1.42  | 0.26 | 1.03  | 0.9382 | 1.01  | 0.9674 | 1.13  | 0.748  | 4.41  | 0.1279 |
| 92646_at   | 1416948_at   | Mrpl23            | mitochondrial ribosomal protein L23             | 1.64  | 0    | 1.08  | 0.2102 | -1.02 | 0.759  | 1.18  | 0.0052 | 1.44  | 0.1098 |
| 92647_at   | 1434892_x_at | Rbbp4             | retinoblastoma binding protein 4                | -1.27 | 0.27 | 1.21  | 0.0642 | 1.11  | 0.3867 | 1.18  | 0.0345 | 1.06  | 0.7097 |
| 92648_at   | 1435058_x_at | Stxbp3            | syntaxin binding protein 3                      | 1.36  | 0.1  | -1.02 | 0.8094 | 1.07  | 0.4438 | 1.08  | 0.3668 | -1.39 | 0.0169 |
| 92649_at   | 1419516_at   | D0HXS9928E        | DNA segment, human DXS9928E                     | 1.74  | 0.03 | 1.1   | 0.1019 | 1.16  | 0.1301 | 1.1   | 0.1338 | 1.23  | 0.1081 |
| 92650_at   | 1420976_at   | Man1a2            | mannosidase, alpha, class 1A, member 2          | -3.73 | 0.15 | 1.34  | 0.5318 | -1.03 | 0.9271 | 1.32  | 0.4084 | -1.37 | 0.2016 |
| 92652_at   | 1449146_at   | Notch4            | Notch gene homolog 4 (Drosophila)               | -1.04 | 0.91 | -1.16 | 0.4594 | 1.09  | 0.607  | -1.01 | 0.9724 | -1.09 | 0.7906 |
| 92653_at   | 1437917_at   | D530037H12Ril     | RIKEN cDNA D530037H12 gene                      | -1.57 | 0.39 | -1.09 | 0.4459 | 1.21  | 0.1707 | -1.03 | 0.8237 | 2.86  | 0.0892 |
| 92654_at   | 1434453_at   | Polr3a            | polymerase (RNA) III (DNA directed) polype      | 2.91  | 0.02 | -1.31 | 0.2569 | -1.31 | 0.2669 | 1.03  | 0.9031 | 1.06  | 0.897  |
| 92655_at   | 1449538_a_at | Gcnt1             | glucosaminyl (N-acetyl) transferase 1, core 1   | -1.41 | 0.41 | -1.17 | 0.0823 | -1.25 | 0.1307 | -1.25 | 0.0226 | 1.59  | 0.0691 |
| 92656_at   | 1436382_at   | Zbtb12            | zinc finger and BTB domain containing 12        | 1.09  | 0.78 | 1.25  | 0.2088 | -1.11 | 0.4659 | 1.08  | 0.707  | 1.25  | 0.3523 |
| 92658_at   | 1422735_at   | Foxq1             | forkhead box Q1                                 | 1.2   | 0.63 | -2.48 | 0.0013 | -2.13 | 0.0033 | -1.91 | 0.0053 | -1.26 | 0.6123 |
| 92659_at   | 1421622_a_at | Rapgef4           | Rap guanine nucleotide exchange factor (GI      | -2.56 | 0.02 | -1.24 | 0.1941 | 1.6   | 0.0418 | -1.37 | 0.0206 | 1.07  | 0.9246 |
| 92660_f_at | 1416943_at   | Ube2e1            | ubiquitin-conjugating enzyme E2E 1, UBC4/       | 1.37  | 0.19 | -1.04 | 0.7294 | -1.03 | 0.8764 | -1.07 | 0.3064 | -1.25 | 0.0887 |
| 92662_g_at | 1449957_at   | Ptprv             | protein tyrosine phosphatase, receptor type,    | -1.52 | 0.07 | -1.07 | 0.5396 | -1.03 | 0.7554 | -1.02 | 0.7618 | 1.16  | 0.491  |
| 92665_f_at | 1422011_s_at | Xlr /// 3830403N  | X-linked lymphocyte-regulated complex /// R     | 2.07  | 0.17 | -1.46 | 0.0722 | -1.17 | 0.5528 | -1.41 | 0.1015 | 1.15  | 0.8516 |
| 92666_at   | 1460222_at   | Sh3bp1            | SH3-domain binding protein 1                    | -1.03 | 0.96 | 1.84  | 0.0409 | 2.06  | 0.0269 | 2.22  | 0.0477 | 1.35  | 0.5417 |
| 92667_at   | 1422982_at   | ---               | ---                                             | -1.58 | 0.01 | -1.67 | 0.0004 | -1.25 | 0.1178 | -1.41 | 0.0369 | -1.32 | 0.1752 |
| 92668_at   | 1422755_at   | ---               | ---                                             | 1.29  | 0.42 | 1.03  | 0.8707 | -1.03 | 0.8481 | 1.24  | 0.1524 | 1.71  | 0.1265 |
| 92672_at   | 1453413_at   | Gnas              | GNAS (guanine nucleotide binding protein, c     | -1.19 | 0.68 | -1.38 | 0.2047 | -1.16 | 0.5221 | -1.58 | 0.0733 | 1.12  | 0.6505 |
| 92673_at   | 1418792_at   | Sh3gl2            | SH3-domain GRB2-like 2                          | -3.47 | 0.04 | -1.42 | 0.0945 | -1.33 | 0.107  | -1.28 | 0.2377 | 1.01  | 0.9816 |
| 92674_at   | 1450508_at   | Foxn1             | forkhead box N1                                 | -2.15 | 0.32 | 1.21  | 0.667  | -1.12 | 0.7808 | -1.45 | 0.3322 | 1.14  | 0.71   |
| 92676_at   | 1424704_at   | Runx2             | runt related transcription factor 2             | 1.81  | 0.31 | 1.94  | 0.1341 | 1.06  | 0.5894 | 1.99  | 0.1354 | 1.07  | 0.8255 |
| 92681_at   | 1417217_at   | ---               | ---                                             | -1.35 | 0.59 | -2.81 | 0.0424 | -3.12 | 0.0306 | -3.92 | 0.0198 | -1.34 | 0.4831 |
| 92682_at   | 1450800_at   | Syt8              | synaptotagmin 8                                 | 1.8   | 0.15 | 1.64  | 0.1824 | 1.06  | 0.3684 | 1.59  | 0.1016 | 2.71  | 0.1663 |
| 92683_at   | 1422828_at   | Cd3d              | CD3 antigen, delta polypeptide                  | -1.06 | 0.86 | 1.5   | 0.2354 | 1.32  | 0.3008 | 1.54  | 0.1204 | 1.66  | 0.4079 |
| 92685_at   | 1419222_at   | Tbxa2r            | thromboxane A2 receptor                         | -2.06 | 0.22 | 1.17  | 0.4319 | 1.22  | 0.1767 | -1.11 | 0.3112 | 1.8   | 0.1006 |
| 92686_at   | 1427180_at   | Slc27a3           | Solute carrier family 27 (fatty acid transporte | -1.03 | 0.9  | 1.04  | 0.7485 | 1.09  | 0.5091 | -1.06 | 0.6616 | 1.43  | 0.2719 |
| 92688_at   | 1424655_at   | Acp2              | acid phosphatase 2, lysosomal                   | 1.24  | 0.28 | -1.15 | 0.1012 | -1.29 | 0.0155 | -1.16 | 0.1733 | 1     | 0.9962 |
| 92689_at   | 1450424_a_at | Il18bp            | interleukin 18 binding protein                  | 2.12  | 0.13 | 1.77  | 0.2017 | -1.2  | 0.2349 | 1.82  | 0.2219 | 1.15  | 0.8002 |
| 92690_at   | 1419020_at   | Gif               | gastric intrinsic factor                        | -2.12 | 0.09 | 1.21  | 0.4975 | 1.07  | 0.8342 | 1.28  | 0.3502 | -1.08 | 0.7474 |
| 92691_at   | 1426621_a_at | Ppp2r2b           | protein phosphatase 2 (formerly 2A), regulat    | -1.11 | 0.9  | 1.23  | 0.54   | 1.73  | 0.1013 | 1.18  | 0.5543 | -1.16 | 0.6325 |
| 92692_at   | 1427291_at   | Sycp1             | synaptonemal complex protein 1                  | -1.05 | 0.9  | 1.39  | 0.4351 | -1.34 | 0.3991 | -1.49 | 0.1916 | -1.67 | 0.1219 |
| 92693_at   | 1419078_at   | Nin               | ninein                                          | 1.01  | 0.98 | 1.46  | 0.3157 | 1.52  | 0.2343 | 1.8   | 0.1677 | 1.96  | 0.1147 |
| 92694_at   | 1425451_s_at | Chi3l3 /// Chi3l4 | chitinase 3-like 3 /// chitinase 3-like 4       | -1.39 | 0.55 | 1.14  | 0.6231 | 1.19  | 0.4654 | 1.31  | 0.2874 | 1.03  | 0.9334 |
| 92695_at   | 1449814_at   | Frat1             | frequently rearranged in advanced T-cell lym    | 1.07  | 0.65 | 1.54  | 0.0498 | 1.25  | 0.3962 | 1.67  | 0.004  | 1.56  | 0.3022 |
| 92696_at   | 1421515_at   | Nr6a1             | nuclear receptor subfamily 6, group A, mem      | -2.31 | 0.34 | -1.03 | 0.7611 | -1.11 | 0.4425 | -1.12 | 0.5116 | 1.47  | 0.4642 |
| 92697_at   | 1418496_at   | Foxa1             | forkhead box A1                                 | 1.22  | 0.06 | -1.12 | 0.2788 | -1    | 0.9617 | -1.17 | 0.1019 | 1.09  | 0.7266 |
| 92698_at   | 1422869_at   | Mertk             | c-mer proto-oncogene tyrosine kinase            | 1.62  | 0.25 | 1.01  | 0.8054 | 1.03  | 0.7164 | -1.04 | 0.5185 | 1.63  | 0.2278 |
| 92699_at   | 1448783_at   | Slc7a9            | solute carrier family 7 (cationic amino acid tr | -4.77 | 0.22 | 1.22  | 0.3706 | 1.58  | 0.1089 | 1.22  | 0.4707 | -1.19 | 0.7054 |
| 92700_at   | 1416718_at   | Bcan              | brevican                                        | -1.96 | 0.09 | 1.05  | 0.7368 | 1.19  | 0.023  | 1.12  | 0.1594 | 1.13  | 0.6159 |
| 92701_at   | 1427458_at   | Bmp1              | bone morphogenetic protein 1                    | -1.37 | 0.13 | -1.45 | 0.0004 | -1.19 | 0.0569 | -1.46 | 0.0001 | 1.1   | 0.2585 |
| 92702_at   | 1418615_at   | Astn1             | astrotactin 1                                   | -1.9  | 0.44 | 1.05  | 0.8598 | 1     | 0.9958 | -1.87 | 0.0444 | 1.51  | 0.4075 |
| 92703_at   | 1427266_at   | MGI:1923998       | RIKEN cDNA 2310032M22 gene                      | 1.27  | 0.61 | 1.01  | 0.9675 | -1.53 | 0.0642 | -1.5  | 0.1094 | 2.24  | 0.007  |
| 92706_at   | 1427140_at   | Pvt1              | plasmacytoma variant translocation 1            | -1.49 | 0.42 | -1.11 | 0.3379 | 1.07  | 0.5718 | -1.1  | 0.2869 | 1.22  | 0.1683 |
| 92707_at   | 1450541_at   | Pvt1              | plasmacytoma variant translocation 1            | -2.07 | 0.33 | -1.05 | 0.8959 | 1.17  | 0.7499 | 1.05  | 0.896  | -1.07 | 0.8997 |
| 92708_at   | 1424590_at   | Ddx19b            | DEAD (Asp-Glu-Ala-Asp) box polypeptide 1        | -1.28 | 0.09 | -1.01 | 0.9166 | -1.03 | 0.6922 | -1.03 | 0.7331 | -1.31 | 0.1588 |

|            |              |               |                                                 |       |      |       |        |       |        |       |        |       |        |
|------------|--------------|---------------|-------------------------------------------------|-------|------|-------|--------|-------|--------|-------|--------|-------|--------|
| 92710_at   | 1419457_at   | Rgnef         | Rho-guanine nucleotide exchange factor          | 2.53  | 0.01 | 1.21  | 0.5488 | 1.06  | 0.8637 | 1.16  | 0.6641 | 2.27  | 0.0176 |
| 92711_at   | 1451802_at   | Mcpt6         | mast cell protease 6                            | 1.34  | 0.31 | -1.45 | 0.0123 | -1.34 | 0.0577 | -1.23 | 0.0623 | 1.11  | 0.511  |
| 92712_at   | 1422918_at   | 1810009J06Rik | RIKEN cDNA 1810009J06 gene                      | -1.61 | 0.05 | 1.01  | 0.9488 | 1.02  | 0.8615 | -1.06 | 0.6482 | 1.27  | 0.1649 |
| 92713_at   | 1450447_at   | Hnf4a         | hepatic nuclear factor 4, alpha                 | -4.59 | 0.11 | -1.12 | 0.4657 | 1.04  | 0.8426 | -1.42 | 0.0547 | 1.01  | 0.9847 |
| 92714_at   | 1418619_at   | Icam5         | intercellular adhesion molecule 5, telenceph    | -1.12 | 0.85 | -1.18 | 0.2319 | -1.01 | 0.9727 | 1.07  | 0.7831 | 1.04  | 0.8366 |
| 92715_at   | 1419762_at   | Ubd           | ubiquitin D                                     | 1.48  | 0.35 | 48.33 | 0.1817 | 1.3   | 0.3218 | 88.77 | 0.0878 | -1.65 | 0.5572 |
| 92717_at   | 1426413_at   | Neurod1       | neurogenic differentiation 1                    | -2.05 | 0.22 | -1.59 | 0.0799 | -1.73 | 0.0392 | -2.04 | 0.0123 | 2.64  | 0.1994 |
| 92718_at   | 1426278_at   | Ilf1          | interferon, alpha-inducible protein 27          | 1.13  | 0.48 | 1.26  | 0.2533 | 1.25  | 0.1971 | 1.33  | 0.0843 | -1.36 | 0.4719 |
| 92724_at   | 1455740_at   | Hnrpa1        | Heterogeneous nuclear ribonucleoprotein A'      | 1.09  | 0.64 | 1.29  | 0.0302 | -1.01 | 0.932  | 1.42  | 0.0026 | 1.76  | 0.0014 |
| 92726_at   | 1427677_a_at | Sox6          | SRY-box containing gene 6                       | 1.36  | 0.49 | -1.18 | 0.185  | -1.28 | 0.0754 | -1.11 | 0.5121 | 1.67  | 0.0205 |
| 92727_at   | 1427288_at   | Apba2         | amyloid beta (A4) precursor protein-binding,    | 1.18  | 0.8  | -1.23 | 0.4084 | -1.22 | 0.4757 | -1.22 | 0.4322 | 1.72  | 0.0186 |
| 92728_at   | 1422873_at   | Prg2          | proteoglycan 2, bone marrow                     | -1.1  | 0.38 | 1.25  | 0.111  | 1.16  | 0.178  | -1.07 | 0.311  | 1.31  | 0.209  |
| 92730_at   | 1418350_at   | Hbegf         | heparin-binding EGF-like growth factor          | -1.51 | 0.05 | -1.06 | 0.4845 | -1.28 | 0.0197 | 1.01  | 0.9043 | 1.27  | 0.2882 |
| 92731_at   | 1418666_at   | Ptx3          | pentaxin related gene                           | 1.34  | 0.65 | 1.49  | 0.0851 | 1.25  | 0.4578 | 1.11  | 0.7375 | -1.22 | 0.597  |
| 92732_at   | 1460374_at   | Adam2         | a disintegrin and metalloprotease domain 2      | -1.43 | 0.17 | -2.25 | 0.1172 | -1.27 | 0.6206 | -2.17 | 0.1211 | -1.01 | 0.9761 |
| 92734_at   | 1423415_at   | Gpr83         | G protein-coupled receptor 83                   | -2.22 | 0.13 | -2.83 | 0.0069 | -1.3  | 0.4728 | -1.77 | 0.0981 | -1.36 | 0.5243 |
| 92735_at   | 1450128_at   | Pla2g2a       | phospholipase A2, group IIA (platelets, syno    | -1.52 | 0.18 | 1.32  | 0.0671 | 1.59  | 0.0167 | 1.24  | 0.221  | 1.19  | 0.614  |
| 92736_at   | 1422648_at   | Slc7a2        | solute carrier family 7 (cationic amino acid tr | 1.63  | 0.23 | 1.58  | 0.0301 | 1.24  | 0.1752 | 1.77  | 0.0079 | 2.84  | 0.0766 |
| 92737_at   | 1421173_at   | Irf4          | interferon regulatory factor 4                  | -1.29 | 0.59 | -1.06 | 0.5653 | 1.06  | 0.5299 | -1.01 | 0.9151 | 1.2   | 0.5797 |
| 92738_at   | 1419080_at   | Gdnf          | glial cell line derived neurotrophic factor     | -1.28 | 0.63 | -1.21 | 0.0621 | 1.09  | 0.2955 | 1.01  | 0.9387 | 1.14  | 0.6975 |
| 92739_at   | 1422222_at   | Ivl           | involucrin                                      | -1.67 | 0.44 | 1.7   | 0.0528 | 1.03  | 0.8834 | 1.05  | 0.8255 | -1.31 | 0.4686 |
| 92742_at   | 1417789_at   | Ccl11         | small chemokine (C-C motif) ligand 11           | 2.29  | 0.2  | -2.03 | 0.1729 | -2.17 | 0.1815 | -2.29 | 0.1328 | 1.09  | 0.868  |
| 92743_at   | 1419432_at   | Spam1         | sperm adhesion molecule 1                       | -1.14 | 0.65 | -1.14 | 0.3912 | -1.2  | 0.3121 | -1.09 | 0.4592 | 1.53  | 0.0976 |
| 92744_at   | 1455231_s_at | Apc2          | adenomatous polyposis coli 2                    | 1.47  | 0.52 | -1.25 | 0.1325 | -1.12 | 0.2693 | -1.4  | 0.0196 | -1.8  | 0.2673 |
| 92745_at   | 1421579_at   | Hoxa9         | homeo box A9                                    | -1.39 | 0.46 | 1.05  | 0.8333 | 1.26  | 0.1641 | 1.03  | 0.8694 | 1.54  | 0.0821 |
| 92746_at   | 1449981_a_at | Nat2          | N-acetyltransferase 2 (arylamine N-acetyltra    | 1.01  | 0.99 | 1.18  | 0.0655 | 1.14  | 0.2982 | 1.17  | 0.0356 | -1.58 | 0.0343 |
| 92747_at   | 1421112_at   | Nkx2-2        | NK2 transcription factor related, locus 2 (Drc  | 1.65  | 0.47 | -1.01 | 0.9632 | 1.09  | 0.7052 | 1.05  | 0.8132 | 1.12  | 0.8014 |
| 92749_at   | 1419719_at   | Gabbr1        | gamma-aminobutyric acid (GABA-A) recepto        | -1.62 | 0.49 | 1.01  | 0.98   | 1.03  | 0.9529 | 1.36  | 0.5019 | 1.14  | 0.731  |
| 92753_at   | 1423984_a_at | Mrg2          | myeloid ecotropic viral integration site-relate | 2.85  | 0.13 | 1.2   | 0.5886 | 1.05  | 0.7602 | -1.04 | 0.862  | 3.04  | 0.0501 |
| 92754_at   | 1416806_at   | Fdxr          | ferredoxin reductase                            | -1.04 | 0.8  | 1.15  | 0.1251 | -1.09 | 0.1861 | 1.13  | 0.0913 | 1.19  | 0.1639 |
| 92756_r_at | 1418805_at   | Sct           | secretin                                        | -2.34 | 0.11 | -1.06 | 0.6228 | -1.06 | 0.4498 | -1.18 | 0.0288 | 1.26  | 0.0875 |
| 92757_at   | 1427674_a_at | Sez6          | seizure related gene 6                          | -1.37 | 0.34 | 1.38  | 0.1664 | 1.26  | 0.3444 | 1.15  | 0.4394 | 2.31  | 0.1831 |
| 92758_at   | 1450698_at   | Dusp2         | dual specificity phosphatase 2                  | 3.08  | 0.01 | 1.16  | 0.712  | -1.08 | 0.8185 | 1.04  | 0.9137 | 1.57  | 0.3906 |
| 92759_at   | 1417812_a_at | Lamb3         | laminin, beta 3                                 | 3.56  | 0.12 | 1.38  | 0.112  | 1.19  | 0.5164 | 1.11  | 0.3975 | 1.56  | 0.1677 |
| 92760_at   | 1419631_at   | Was           | Wiskott-Aldrich syndrome homolog (human)        | -1.51 | 0.5  | 1.36  | 0.4627 | 1.02  | 0.9458 | 1.64  | 0.2672 | 1.46  | 0.2702 |
| 92762_at   | 1422013_at   | Clec4a2       | C-type lectin domain family 4, member a2        | 1.03  | 0.96 | 1.48  | 0.4446 | -1.29 | 0.4235 | 1.62  | 0.4598 | 2.81  | 0.2037 |
| 92763_at   | 1427490_at   | Abcb7         | ATP-binding cassette, sub-family B (MDR/T,      | 1.98  | 0.14 | 1.38  | 0.0541 | 1.2   | 0.3954 | 1.27  | 0.2287 | -1.32 | 0.1476 |
| 92764_at   | 1450114_at   | Ksr           | kinase suppressor of ras                        | -1.13 | 0.38 | -1.28 | 0.036  | -1.16 | 0.1564 | -1.25 | 0.0529 | 1.28  | 0.0128 |
| 92766_at   | 1417525_at   | Hand1         | heart and neural crest derivatives expressec    | -1.27 | 0.63 | -1.17 | 0.5261 | 1.03  | 0.8742 | 1.05  | 0.8145 | 1.23  | 0.4013 |
| 92767_at   | 1425493_at   | Bmpr1a        | bone morphogenetic protein receptor, type 1     | 1.83  | 0.38 | 1.26  | 0.2247 | -1.13 | 0.7512 | 1.09  | 0.749  | -1.6  | 0.4128 |
| 92768_s_at | 1451675_a_at | Alas2         | aminolevulinic acid synthase 2, erythroid       | -1.99 | 0.07 | 1.78  | 0.0003 | -1.28 | 0.0379 | 1.73  | 0      | -5.43 | 0.0001 |
| 92769_at   | 1448479_at   | Psmc3         | proteasome (prosome, macropain) 26S subu        | -1.15 | 0.34 | -1.06 | 0.3263 | 1.09  | 0.5415 | 1.04  | 0.6008 | 1.18  | 0.3089 |
| 92770_at   | 1421375_a_at | S100a6        | S100 calcium binding protein A6 (calcyclin)     | 2.06  | 0.17 | 1.68  | 0.2921 | -1.38 | 0.3443 | 2.31  | 0.1059 | 1.46  | 0.2156 |
| 92773_at   | 1448943_at   | Nrp1          | neuropilin 1                                    | -1.17 | 0.16 | -1.26 | 0.0241 | -1.05 | 0.691  | -1.26 | 0.0622 | -1.99 | 0.0081 |
| 92775_at   | 1451296_x_at | Pabpc4        | poly A binding protein, cytoplasmic 4           | 1.15  | 0.25 | 1.03  | 0.6613 | 1.17  | 0.1692 | 1.23  | 0.0242 | 1.36  | 0.1028 |
| 92777_at   | 1438133_a_at | Cyr61         | cysteine rich protein 61                        | 1.26  | 0.26 | 1.09  | 0.5162 | -1.02 | 0.8993 | -1.28 | 0.1245 | 1.32  | 0.1141 |
| 92779_f_at | 1425584_x_at | ---           | ---                                             | -1.36 | 0.71 | 1.11  | 0.7479 | 1.25  | 0.6215 | -1.3  | 0.4675 | 2.52  | 0.075  |
| 92780_f_at | 1425471_x_at | ---           | ---                                             | -3    | 0.22 | 1.34  | 0.4135 | -1.32 | 0.3514 | -1.05 | 0.8545 | 1.77  | 0.1826 |
| 92781_at   | 1426020_at   | Tmpo          | thymopoietin                                    | -1.29 | 0.48 | -1.45 | 0.009  | -1.18 | 0.1039 | -1.65 | 0.0005 | 1.19  | 0.2785 |
| 92783_at   | 1460310_a_at | Gh            | growth hormone                                  | 1.45  | 0.07 | -1.08 | 0.3722 | 1.03  | 0.7132 | -1.01 | 0.9183 | 1.18  | 0.218  |
| 92784_at   | 1419980_at   | Gba2          | glucosidase beta 2                              | 1.88  | 0.05 | -1.31 | 0.436  | -1.37 | 0.4396 | 1.12  | 0.7515 | 2.26  | 0.1522 |
| 92786_at   | 1448507_at   | Efhd1         | EF hand domain containing 1                     | 1     | 0.99 | -1.35 | 0.02   | -1.01 | 0.9097 | -1.19 | 0.1179 | 1.38  | 0.0481 |
| 92787_at   | 1448199_at   | Ankrd10       | ankyrin repeat domain 10                        | -1.19 | 0.14 | 1.15  | 0.0267 | 1.12  | 0.0902 | 1.06  | 0.4893 | 1.06  | 0.483  |



|            |              |               |                                                 |       |      |       |        |       |        |       |        |       |        |
|------------|--------------|---------------|-------------------------------------------------|-------|------|-------|--------|-------|--------|-------|--------|-------|--------|
| 92789_r_at | 1417239_at   | Cetn3         | centrin 3                                       | 1.11  | 0.13 | 1.13  | 0.3727 | 1.27  | 0.2523 | 1.26  | 0.1588 | 1.19  | 0.4096 |
| 92790_at   | 1415860_at   | Kpna2         | karyopherin (importin) alpha 2                  | 2.24  | 0.09 | -1.12 | 0.5369 | 1.1   | 0.5396 | -1.03 | 0.7706 | -1.84 | 0.0468 |
| 92793_at   | 1417291_at   | Tnfrsf1a      | tumor necrosis factor receptor superfamily, r   | 1.4   | 0.03 | 1.06  | 0.2803 | 1.03  | 0.6896 | 1.06  | 0.3063 | 1.18  | 0.0341 |
| 92795_at   | 1416091_at   | Mtap4         | microtubule-associated protein 4                | 2.07  | 0.17 | 1.14  | 0.2729 | 1.39  | 0.03   | 1.23  | 0.1054 | 1.11  | 0.1345 |
| 92796_at   | 1423611_at   | Akp2          | alkaline phosphatase 2, liver                   | -1.23 | 0.1  | 1.16  | 0.2416 | 1.41  | 0.0106 | 1.32  | 0.0055 | 1.37  | 0.125  |
| 92797_at   | 1422794_at   | Cul3          | cullin 3                                        | 2.2   | 0.11 | 1.31  | 0.0005 | 1.27  | 0.005  | 1.39  | 0.0007 | 1.23  | 0.1837 |
| 92800_i_at | 1416058_s_at | Atp5c1        | ATP synthase, H+ transporting, mitochondri      | 1.45  | 0.06 | 1.08  | 0.2293 | 1.12  | 0.1856 | 1.18  | 0.0455 | 1.09  | 0.5581 |
| 92801_at   | 1425468_at   | Plp1          | proteolipid protein (myelin) 1                  | -1.49 | 0.35 | -1.6  | 0.094  | -1.2  | 0.2259 | -1.37 | 0.0931 | 1.31  | 0.5932 |
| 92802_s_at | 1425467_a_at | Plp1          | proteolipid protein (myelin) 1                  | -1.69 | 0.06 | 1.52  | 0.104  | 1.61  | 0.2267 | 1.49  | 0.1322 | 1.15  | 0.6991 |
| 92803_at   | 1429287_a_at | Prl           | prolactin                                       | -3.84 | 0.06 | -1.04 | 0.9087 | 1.23  | 0.4957 | 1.08  | 0.8359 | 1.58  | 0.271  |
| 92804_at   | 1424473_at   | LOC381040     | similar to polymerase (RNA) II (DNA directer    | 1.16  | 0.47 | 1.03  | 0.7328 | 1.02  | 0.8396 | -1.04 | 0.6329 | 1.76  | 0.0116 |
| 92805_s_at | 1431429_a_at | Arl4          | ADP-ribosylation factor-like 4                  | 2.34  | 0.03 | 1.37  | 0.2125 | -1.35 | 0.3164 | 1.51  | 0.0828 | 1.07  | 0.8985 |
| 92806_at   | 1428309_s_at | ---           | ---                                             | 1.27  | 0.05 | 1.06  | 0.4117 | 1.05  | 0.4561 | 1.03  | 0.4747 | 1.47  | 0.0428 |
| 92807_at   | 1416119_at   | Txn1          | thioredoxin 1                                   | -1.18 | 0.07 | -1    | 0.9878 | -1    | 0.9576 | -1.08 | 0.4094 | -1.21 | 0.1438 |
| 92811_at   | 1422846_at   | Rbp2          | retinol binding protein 2, cellular             | -2.09 | 0.12 | -1.76 | 0.0493 | 2.46  | 0.3732 | -1.41 | 0.205  | 1.13  | 0.7682 |
| 92814_at   | 1417532_at   | Cyp2j5        | cytochrome P450, family 2, subfamily j, poly    | -1.2  | 0.78 | -1.5  | 0.1638 | -3.66 | 0.0004 | -3.99 | 0.0003 | -2.21 | 0.0285 |
| 92816_r_at | 1434985_a_at | Eif4a1        | eukaryotic translation initiation factor 4A1    | -1.08 | 0.44 | 1.1   | 0.3509 | 1.09  | 0.4864 | 1.23  | 0.1136 | 1.16  | 0.0267 |
| 92817_at   | 1416210_at   | 1190002L16Rik | RIKEN cDNA 1190002L16 gene                      | 1.24  | 0.17 | 1.19  | 0.02   | 1.24  | 0.0061 | 1.23  | 0.0126 | 1.16  | 0.3107 |
| 92818_at   | 1417202_s_at | Ube1c         | ubiquitin-activating enzyme E1C                 | 1.43  | 0.02 | 1.09  | 0.235  | 1.18  | 0.1038 | 1.16  | 0.083  | -1.1  | 0.4608 |
| 92820_at   | 1417169_at   | Usp2          | ubiquitin specific protease 2                   | 9.81  | 0.17 | 1.22  | 0.0843 | 1.71  | 0.0001 | 1.46  | 0.0084 | 1.73  | 0.171  |
| 92821_at   | 1417168_a_at | Usp2          | ubiquitin specific protease 2                   | 3.35  | 0.31 | 1.15  | 0.2626 | 1.42  | 0.0189 | 1.33  | 0.0877 | 1.62  | 0.18   |
| 92824_at   | 1448574_at   | Nme6          | expressed in non-metastatic cells 6, protein    | -1.17 | 0.62 | -1.12 | 0.0512 | 1.14  | 0.0095 | -1.04 | 0.5942 | 1.13  | 0.1979 |
| 92825_at   | 1416717_at   | Crisp2        | cysteine-rich secretory protein 2               | -2.45 | 0.33 | 1.06  | 0.8265 | -1.3  | 0.1983 | -1.27 | 0.2396 | -2.4  | 0.0664 |
| 92826_at   | 1427173_a_at | Mrps33        | mitochondrial ribosomal protein S33             | 1.48  | 0.26 | 1     | 0.9839 | 1     | 0.9968 | 1.03  | 0.6556 | -1.19 | 0.064  |
| 92827_at   | 1420881_at   | Nsd1          | nuclear receptor-binding SET-domain protei      | -1.19 | 0.57 | 1.01  | 0.9637 | -1.25 | 0.3783 | -1.07 | 0.7719 | 1.11  | 0.6664 |
| 92828_at   | 1449438_at   | Dpm1          | dolichol-phosphate (beta-D) mannosyltransf      | 1.73  | 0.03 | 1.11  | 0.108  | 1.07  | 0.5108 | 1.15  | 0.0629 | -1.1  | 0.514  |
| 92829_at   | 1450668_s_at | Hspe1         | heat shock protein 1 (chaperonin 10)            | 1.57  | 0.04 | -1.01 | 0.7583 | 1.04  | 0.5254 | -1.01 | 0.8561 | -1.08 | 0.2579 |
| 92830_s_at | 1452519_a_at | Zfp36         | zinc finger protein 36                          | 1.57  | 0.19 | 1.62  | 0.0033 | 1.08  | 0.4575 | 1.23  | 0.0429 | 1.17  | 0.4526 |
| 92831_at   | 1417560_at   | Sfxn1         | sideroflexin 1                                  | 1.3   | 0.34 | 1.31  | 0.0286 | -1.29 | 0.0123 | 1.29  | 0.0274 | 1.17  | 0.3092 |
| 92832_at   | 1450446_a_at | Socs1         | suppressor of cytokine signaling 1              | 1.19  | 0.54 | 1.78  | 0.2667 | 1.16  | 0.5252 | 2.72  | 0.0737 | 2.21  | 0.1558 |
| 92833_at   | 1418645_at   | Hal           | histidine ammonia lyase                         | 1.1   | 0.69 | 1.21  | 0.0057 | 1.17  | 0.2223 | 1.19  | 0.027  | 1.03  | 0.7223 |
| 92834_at   | 1433928_a_at | Rpl13a        | Ribosomal protein L13a                          | 1.41  | 0.16 | -1.12 | 0.1787 | 1.2   | 0.0222 | -1.08 | 0.1802 | -1.22 | 0.1371 |
| 92835_at   | 1418013_at   | Cml1          | camello-like 1                                  | -1.2  | 0.21 | -1.62 | 0.0003 | -1.32 | 0.0158 | -2    | 0      | -3.99 | 0      |
| 92836_at   | 1420855_at   | Eln           | elastin                                         | -1.66 | 0.32 | -1.04 | 0.4877 | 1.02  | 0.7877 | -1.01 | 0.9432 | 1.11  | 0.6632 |
| 92837_f_at | 1417835_at   | Mug1          | murinoglobulin 1                                | -1.48 | 0.08 | 1.37  | 0.0026 | 1.14  | 0.3293 | 1.41  | 0.001  | -1.19 | 0.2662 |
| 92838_at   | 1448378_at   | Fscn1         | fascin homolog 1, actin bundling protein (Str   | 1.03  | 0.67 | 1.31  | 0.0559 | 1.22  | 0.1012 | 1.18  | 0.2393 | 1.19  | 0.0883 |
| 92840_at   | 1433580_at   | Nup54         | nucleoporin 54                                  | 1.29  | 0.75 | 4.02  | 0.0005 | 4.22  | 0.0227 | 3.6   | 0.004  | 1.27  | 0.4493 |
| 92842_r_at | 1415885_at   | Chgb          | chromogranin B                                  | -1.27 | 0.56 | 1.03  | 0.946  | -1.25 | 0.68   | -1.22 | 0.7207 | 1.27  | 0.7908 |
| 92845_at   | 1428140_at   | Oxct1         | 3-oxoacid CoA transferase 1                     | 2.57  | 0.03 | -1.32 | 0.3977 | -1.43 | 0.1593 | -1.05 | 0.8832 | 1.22  | 0.4518 |
| 92847_s_at | 1416385_a_at | M6pr          | mannose-6-phosphate receptor, cation depe       | -1.27 | 0.12 | 1.11  | 0.3922 | 1.07  | 0.6351 | 1.05  | 0.5907 | -1.24 | 0.1603 |
| 92848_at   | 1416452_at   | Oat           | ornithine aminotransferase                      | 1.33  | 0.25 | 1.15  | 0.1977 | -1.23 | 0.0468 | 1.13  | 0.3405 | 1.42  | 0.026  |
| 92849_at   | 1417266_at   | Ccl6          | chemokine (C-C motif) ligand 6                  | 1.04  | 0.93 | -1.17 | 0.1005 | -1.1  | 0.3198 | -1.12 | 0.296  | 1.61  | 0.0109 |
| 92850_at   | 1452767_at   | Rrbp1         | ribosome binding protein 1                      | -1.05 | 0.85 | -1.07 | 0.3388 | -1.25 | 0.0003 | -1.24 | 0.0048 | -1.23 | 0.0694 |
| 92851_at   | 1455393_at   | ---           | ---                                             | -1.49 | 0.11 | 1.08  | 0.4514 | -1.02 | 0.7258 | 1.07  | 0.5875 | 1.01  | 0.8861 |
| 92852_at   | 1426642_at   | Fn1           | fibronectin 1                                   | -1.43 | 0    | -1.01 | 0.9197 | -1.01 | 0.8537 | -1.06 | 0.2955 | 1.01  | 0.8393 |
| 92854_at   | 1449256_a_at | Rab11a        | RAB11a, member RAS oncogene family              | 1.23  | 0.02 | 1.13  | 0.0119 | 1.17  | 0.0265 | 1.17  | 0.0158 | -1.15 | 0.1814 |
| 92855_at   | 1423799_at   | Sui1-rs1      | suppressor of initiator codon mutations, rela   | 1.72  | 0    | 1.36  | 0.006  | 1.44  | 0      | 1.63  | 0      | 1.56  | 0.0317 |
| 92857_at   | 1448398_s_at | Rpl22         | ribosomal protein L22                           | 1.3   | 0.57 | -1.11 | 0.2687 | -1.02 | 0.7915 | -1.16 | 0.1425 | -1.04 | 0.8576 |
| 92858_at   | 1448377_at   | Slpi          | secretory leukocyte protease inhibitor          | 2.31  | 0.14 | 1.79  | 0.1425 | -1.51 | 0.1329 | 2.13  | 0.1224 | 1.27  | 0.6727 |
| 92862_f_at | 1423227_at   | Krt1-17       | keratin complex 1, acidic, gene 17              | 1.28  | 0.33 | -1.18 | 0.2093 | 1.08  | 0.521  | 1.08  | 0.4218 | 1.12  | 0.6046 |
| 92863_at   | 1448121_at   | Wbp2          | WW domain binding protein 2                     | -1.26 | 0.17 | -1    | 0.9891 | 1.04  | 0.6086 | -1.01 | 0.8791 | 1.08  | 0.4991 |
| 92865_at   | 1424592_a_at | Dnase1        | deoxyribonuclease I                             | -2.35 | 0.32 | 2.91  | 0.0138 | 1.24  | 0.464  | 2.69  | 0.0093 | 1.77  | 0.2408 |
| 92866_at   | 1452431_s_at | H2-Aa         | histocompatibility 2, class II antigen A, alpha | 1.92  | 0.16 | 3.78  | 0.1595 | -1.46 | 0.1159 | 3.45  | 0.1966 | 8.43  | 0.0121 |

|            |              |                 |                                               |       |      |       |        |       |        |       |        |       |        |
|------------|--------------|-----------------|-----------------------------------------------|-------|------|-------|--------|-------|--------|-------|--------|-------|--------|
| 92867_at   | 1437239_x_at | Phc2            | polyhomeotic-like 2 (Drosophila)              | 2.27  | 0.27 | 1.29  | 0.499  | 1.13  | 0.6999 | 1.3   | 0.4558 | 1.06  | 0.6239 |
| 92868_at   | 1416086_at   | Tpst2           | protein-tyrosine sulfotransferase 2           | -1.28 | 0.44 | -1.17 | 0.1857 | 1.04  | 0.6022 | -1.06 | 0.2907 | 1.13  | 0.6022 |
| 92869_at   | 1417554_at   | Hsd3b4          | hydroxysteroid dehydrogenase-4, delta<5>-;    | -1.44 | 0.28 | -1.25 | 0.4422 | -1.11 | 0.6933 | -1.15 | 0.637  | -1.08 | 0.655  |
| 92872_at   | 1448106_at   | 1200016B17Rik   | RIKEN cDNA 1200016B17 gene                    | -1.36 | 0    | -1.07 | 0.2434 | 1.18  | 0.0379 | 1     | 0.9736 | 1.16  | 0.1949 |
| 92873_f_at | 1435507_x_at | Prss2           | protease, serine, 2                           | -3.87 | 0.18 | -1.6  | 0.0786 | -1.51 | 0.1314 | -1.29 | 0.3399 | -1.1  | 0.8504 |
| 92874_f_at | 1423245_at   | Cops7a          | COP9 (constitutive photomorphogenic) hom      | 1.43  | 0.05 | 1.12  | 0.2217 | 1.07  | 0.458  | 1.22  | 0.0154 | 1.08  | 0.6717 |
| 92875_s_at | 1429078_a_at | Cops7a          | COP9 (constitutive photomorphogenic) hom      | 1.79  | 0.48 | 1.12  | 0.06   | -1.04 | 0.7856 | 1.06  | 0.5315 | 1.26  | 0.507  |
| 92876_at   | 1418117_at   | Ndufs4          | NADH dehydrogenase (ubiquinone) Fe-S pr       | -1.05 | 0.89 | 1.02  | 0.8772 | 1.04  | 0.6806 | 1.17  | 0.1723 | -1.07 | 0.8189 |
| 92877_at   | 1448123_s_at | ---             | ---                                           | 1.74  | 0.04 | 1.3   | 0.0829 | -1.02 | 0.7008 | 1.44  | 0.033  | 1.32  | 0.095  |
| 92879_at   | 1416792_at   | Ppm1g           | protein phosphatase 1G (formerly 2C), magr    | -1.19 | 0.54 | 1.07  | 0.4493 | 1.24  | 0.0636 | 1.12  | 0.0837 | 1.08  | 0.5843 |
| 92880_at   | 1420911_a_at | Mfge8           | milk fat globule-EGF factor 8 protein         | -1.28 | 0.08 | 1.32  | 0.029  | 1.07  | 0.4314 | 1.37  | 0.0399 | 1.6   | 0.0055 |
| 92881_at   | 1448371_at   | Mylpf           | myosin light chain, phosphorylatable, fast sk | 2.12  | 0.1  | -1.59 | 0.0029 | -1.3  | 0.0755 | -1.54 | 0.0042 | 1.3   | 0.2886 |
| 92884_at   | 1435638_at   | ---             | ---                                           | -1.23 | 0.09 | -1.01 | 0.9393 | 1.18  | 0.0127 | 1.01  | 0.7926 | 1.28  | 0.0086 |
| 92885_at   | 1450118_a_at | Tnnt3           | troponin T3, skeletal, fast                   | 1.62  | 0.18 | -4.75 | 0.1723 | -3.85 | 0.2021 | -6    | 0.1509 | 1.39  | 0.1711 |
| 92887_at   | 1416457_at   | Ddah2           | dimethylarginine dimethylaminohydrolase 2     | 1.12  | 0.72 | 1.03  | 0.6015 | -1.04 | 0.7121 | 1.01  | 0.9244 | 2.33  | 0.0086 |
| 92888_s_at | 1421664_a_at | Styx            | phosphoserine/threonine/tyrosine interactor   | 2.09  | 0.35 | 1.86  | 0.0012 | 1.04  | 0.8849 | 1.4   | 0.2495 | 1.55  | 0.0034 |
| 92889_r_at | 1422210_at   | Foxd3           | forkhead box D3                               | -1.14 | 0.71 | 1.16  | 0.6787 | 1.51  | 0.3147 | 1.08  | 0.7569 | 1.36  | 0.2997 |
| 92891_f_at | 1449867_at   | Hoxc9           | homeo box C9                                  | 1.06  | 0.87 | -1.34 | 0.1645 | -1.25 | 0.3158 | -1.2  | 0.4018 | 2.56  | 0.0048 |
| 92892_at   | 1418588_at   | Vmp             | vesicular membrane protein p24                | 1.03  | 0.94 | -1.35 | 0.2888 | 1.09  | 0.7191 | -1.34 | 0.3473 | 1.76  | 0.0681 |
| 92894_s_at | 1421162_a_at | Nfia            | nuclear factor I/A                            | 2.89  | 0.03 | -2.22 | 0.012  | -1.55 | 0.1311 | -2.55 | 0.0056 | 1.16  | 0.759  |
| 92895_at   | 1449967_at   | Sim1            | single-minded homolog 1 (Drosophila)          | -2.46 | 0.04 | -1.69 | 0.0745 | -1.29 | 0.3188 | -1.33 | 0.2276 | 1.37  | 0.1797 |
| 92896_s_at | 1419437_at   | Sim2            | single-minded homolog 2 (Drosophila)          | 1.02  | 0.95 | -1.34 | 0.4395 | -1.22 | 0.5772 | -1.32 | 0.4562 | 2.23  | 0.2506 |
| 92897_at   | 1418878_at   | Acrv1           | acrosomal vesicle protein 1                   | 1.32  | 0.63 | -1.22 | 0.5126 | -1.12 | 0.6906 | -1.34 | 0.3274 | 1.67  | 0.312  |
| 92898_at   | 1421075_s_at | Cyp7b1          | cytochrome P450, family 7, subfamily b, poly  | -2.32 | 0.22 | -1.98 | 0.0014 | -1.21 | 0.1431 | -1.61 | 0.0015 | -4.3  | 0.0019 |
| 92900_at   | 1448018_at   | Rere            | RIKEN cDNA E230012J19 gene                    | 1.08  | 0.67 | 1.26  | 0.0725 | 1.07  | 0.6164 | 1.43  | 0.0014 | 1.23  | 0.3961 |
| 92901_at   | 1450180_a_at | Rara            | retinoic acid receptor, alpha                 | 1.89  | 0.24 | 1.07  | 0.8485 | -2.28 | 0.0514 | -1.17 | 0.6805 | -1.99 | 0.2319 |
| 92902_at   | 1450481_at   | Mybl1           | myeloblastosis oncogene-like 1                | -1.18 | 0.81 | -1.65 | 0.1401 | -1.29 | 0.473  | -1.18 | 0.643  | -1.82 | 0.0744 |
| 92903_at   | 1423340_at   | Tcfap2b         | transcription factor AP-2 beta                | -1.6  | 0.43 | -1.17 | 0.5433 | -1.12 | 0.6988 | -1.34 | 0.3293 | 1.42  | 0.4782 |
| 92904_at   | 1420425_at   | Prdm1           | PR domain containing 1, with ZNF domain       | 1.37  | 0.48 | 1.18  | 0.3236 | 1.36  | 0.0269 | 1.08  | 0.647  | 1.09  | 0.4198 |
| 92906_at   | 1452380_at   | Epha7           | Eph receptor A7                               | 1.17  | 0.84 | 1.3   | 0.419  | 1.73  | 0.2676 | 1.02  | 0.9504 | -1.28 | 0.7189 |
| 92907_at   | 1448873_at   | Ocln            | occludin                                      | -3.64 | 0.12 | 1.37  | 0.031  | 1.23  | 0.3234 | 1.28  | 0.1977 | 1.42  | 0.1898 |
| 92908_at   | 1422742_at   | Hivep1          | human immunodeficiency virus type I enhan     | 1.33  | 0.35 | 1.32  | 0.0322 | 1.13  | 0.3416 | 1.44  | 0.003  | -1.03 | 0.9226 |
| 92909_at   | 1418471_at   | Pgf             | placental growth factor                       | 1.25  | 0.69 | -1.07 | 0.4813 | -1.06 | 0.5125 | -1.25 | 0.0531 | 1.66  | 0.2291 |
| 92910_at   | 1420669_at   | Arnt2           | aryl hydrocarbon receptor nuclear translocat  | -1.76 | 0.36 | 1.3   | 0.1206 | 1.47  | 0.0629 | -1.03 | 0.8394 | -1.04 | 0.9015 |
| 92911_at   | 1449177_at   | Ccna1           | cyclin A1                                     | -3.09 | 0.27 | -1.04 | 0.8481 | 1.02  | 0.9571 | -1.5  | 0.0669 | 1.69  | 0.094  |
| 92912_at   | 1421597_a_at | Msx3            | homeo box, msh-like 3                         | -1.02 | 0.96 | -1.01 | 0.9242 | -1.2  | 0.184  | -1.08 | 0.6234 | 1.15  | 0.6414 |
| 92913_at   | 1419748_at   | Abcd2           | ATP-binding cassette, sub-family D (ALD), n   | 4.16  | 0.11 | 1.1   | 0.462  | 1.19  | 0.2414 | 1.19  | 0.0504 | 5.91  | 0.0717 |
| 92914_at   | 1427494_at   | Hoxb7           | homeo box B7                                  | -2.01 | 0.01 | -1.03 | 0.5735 | 1.07  | 0.3359 | -1.03 | 0.6837 | 1     | 0.9883 |
| 92915_s_at | 1452493_s_at | Hoxb7 /// Hoxb8 | homeo box B7 /// homeo box B8                 | -1.22 | 0.12 | -1.09 | 0.3483 | -1.09 | 0.3197 | -1.09 | 0.267  | 1.39  | 0.0263 |
| 92916_at   | 1417708_at   | Syt3            | synaptotagmin 3                               | -1.75 | 0.09 | -1.07 | 0.4111 | -1.1  | 0.2381 | -1.18 | 0.0594 | 1.41  | 0.1788 |
| 92917_at   | 1449478_at   | Mmp7            | matrix metalloproteinase 7                    | -1.75 | 0.16 | 2.41  | 0.0764 | 1.15  | 0.4948 | 2.74  | 0.0768 | 1.76  | 0.1934 |
| 92918_at   | 1419321_at   | F7              | coagulation factor VII                        | 1.14  | 0.3  | -1.46 | 0      | -1.17 | 0.1251 | -1.53 | 0      | -1.05 | 0.7664 |
| 92919_at   | 1418268_at   | Htr3a           | 5-hydroxytryptamine (serotonin) receptor 3A   | -1.23 | 0.31 | -1.12 | 0.5758 | -1.03 | 0.8028 | -1.02 | 0.9086 | 2.96  | 0.0449 |
| 92920_at   | 1449488_at   | Pitx1           | paired-like homeodomain transcription facto   | 1.13  | 0.68 | -1.14 | 0.6666 | 1.12  | 0.5998 | -1.4  | 0.1863 | 1.34  | 0.2166 |
| 92923_g_at | 1421996_at   | Tcfap2a         | transcription factor AP-2, alpha              | -1.17 | 0.48 | -1.03 | 0.8957 | 1.2   | 0.339  | -1.13 | 0.5132 | 1.28  | 0.663  |
| 92925_at   | 1418901_at   | ---             | ---                                           | 1.24  | 0.3  | -1.32 | 0.0682 | -1.13 | 0.3119 | -1.1  | 0.1905 | -1.58 | 0.2539 |
| 92926_at   | 1421461_at   | Mpl             | myeloproliferative leukemia virus oncogene    | -1.24 | 0.29 | 1.16  | 0.4381 | 1.14  | 0.315  | 1.05  | 0.7661 | 1.28  | 0.2979 |
| 92927_at   | 1422607_at   | Etv1            | ets variant gene 1                            | -1.01 | 0.98 | -1.17 | 0.4322 | -1.13 | 0.563  | -1.13 | 0.6397 | 1.28  | 0.4476 |
| 92929_at   | 1450752_at   | Cyct            | cytochrome c, testis                          | -3.45 | 0.11 | -1.46 | 0.3229 | -1.68 | 0.1793 | -2.05 | 0.0882 | -1.72 | 0.2857 |
| 92930_at   | 1449863_a_at | Dlx5            | distal-less homeobox 5                        | 1.11  | 0.84 | 1.02  | 0.9319 | 1.29  | 0.3756 | 1.11  | 0.6692 | -1.56 | 0.2818 |
| 92931_at   | 1419204_at   | Dll1            | delta-like 1 (Drosophila)                     | 1.45  | 0.59 | 1.23  | 0.5246 | 1.32  | 0.3502 | 1.45  | 0.1338 | 1.45  | 0.1156 |
| 92932_at   | 1423288_s_at | Cbln1           | cerebellin 1 precursor protein                | -1.35 | 0.25 | -1.13 | 0.4221 | 1.01  | 0.9287 | -1.15 | 0.2541 | 1.32  | 0.0146 |
| 92934_at   | 1449126_at   | Zfp90           | zinc finger protein 90                        | -1.1  | 0.83 | 2.39  | 0.1043 | 1.53  | 0.0459 | 2.92  | 0.037  | 1.45  | 0.4734 |

|            |              |               |                                                 |       |      |       |        |       |        |       |        |       |        |
|------------|--------------|---------------|-------------------------------------------------|-------|------|-------|--------|-------|--------|-------|--------|-------|--------|
| 92935_at   | 1448785_at   | Cbfa2t1h      | CBFA2T1 identified gene homolog (human)         | -2.44 | 0.34 | -1.35 | 0.3408 | -1.07 | 0.8516 | -1.17 | 0.6221 | 1.29  | 0.5243 |
| 92936_at   | 1449563_at   | Cntn1         | contactin 1                                     | -1.06 | 0.92 | 1.21  | 0.3576 | 1.14  | 0.6569 | 1.07  | 0.822  | 1.61  | 0.0831 |
| 92937_at   | 1418596_at   | ---           | ---                                             | -1.03 | 0.86 | -1.3  | 0.0094 | -1    | 0.974  | -1.63 | 0.0001 | -1.58 | 0.217  |
| 92938_at   | 1421281_at   | Gabra1        | gamma-aminobutyric acid (GABA-A) recept         | 2     | 0.34 | 1.21  | 0.421  | 1.58  | 0.1096 | 1.12  | 0.6966 | 1.08  | 0.8898 |
| 92939_at   | 1417121_at   | Gabra6        | gamma-aminobutyric acid (GABA-A) recept         | -1.76 | 0.36 | 1.2   | 0.6096 | 1.51  | 0.4109 | 1.11  | 0.8146 | -1.05 | 0.8637 |
| 92940_s_at | 1451706_a_at | Gabra6        | gamma-aminobutyric acid (GABA-A) recept         | 1.04  | 0.93 | 1.06  | 0.7522 | 1.15  | 0.3667 | 1     | 0.9857 | 1.05  | 0.8687 |
| 92941_at   | 1436187_at   | 1110054M08Rik | RIKEN cDNA 1110054M08 gene                      | 1.33  | 0.34 | -1.23 | 0.0055 | -1.02 | 0.8503 | -1.39 | 0.062  | -1.85 | 0.0529 |
| 92942_at   | 1448940_at   | Trim21        | tripartite motif protein 21                     | -1.05 | 0.81 | -1.01 | 0.9304 | -1.22 | 0.0476 | 1.01  | 0.9078 | -1.05 | 0.7657 |
| 92943_at   | 1448972_at   | Gria1         | glutamate receptor, ionotropic, AMPA1 (alph     | -1.9  | 0.06 | 1.44  | 0.0406 | 1.25  | 0.2272 | 1.39  | 0.3909 | 1.23  | 0.4716 |
| 92947_s_at | 1421970_a_at | Gria2         | glutamate receptor, ionotropic, AMPA2 (alph     | -2.08 | 0.32 | -1.15 | 0.439  | 1.1   | 0.7821 | -1.12 | 0.345  | 1.22  | 0.5397 |
| 92948_at   | 1427429_at   | Csf2          | colony stimulating factor 2 (granulocyte-mac    | -1.52 | 0.26 | -1.28 | 0.2021 | -1.07 | 0.7959 | -1.13 | 0.5973 | -1.08 | 0.8685 |
| 92949_at   | 1449380_at   | Pacsin1       | protein kinase C and casein kinase substrat     | 1.47  | 0.56 | 1.53  | 0.0459 | 1.58  | 0.0181 | 1.64  | 0.0064 | 1.32  | 0.3026 |
| 92950_at   | 1448257_at   | Slc29a2       | solute carrier family 29 (nucleoside transpor   | 1.14  | 0.42 | 1.43  | 0.4036 | 1.01  | 0.9219 | -1.04 | 0.585  | 1.12  | 0.4795 |
| 92951_at   | 1450584_at   | Hoxd11        | homeo box D11                                   | -2.06 | 0.23 | -2.8  | 0.0226 | -2.28 | 0.0513 | -2.19 | 0.0633 | 1     | 0.9971 |
| 92952_f_at | 1427470_s_at | Napb          | N-ethylmaleimide sensitive fusion protein att   | -1.09 | 0.61 | 1.51  | 0.0332 | 1.41  | 0.1417 | 1.32  | 0.1912 | 1.19  | 0.6449 |
| 92953_at   | 1427671_a_at | Fmn1          | formin 1                                        | -2.29 | 0.24 | -1.86 | 0.0513 | -1.32 | 0.354  | -2.22 | 0.0171 | -3.42 | 0.0116 |
| 92955_at   | 1419712_at   | Il3ra         | interleukin 3 receptor, alpha chain             | 2.25  | 0.14 | 1.27  | 0.1481 | 1.01  | 0.93   | 1.17  | 0.2789 | 1.78  | 0.1045 |
| 92956_at   | 1421965_s_at | Notch3        | Notch gene homolog 3 (Drosophila)               | 1.31  | 0.48 | 1.19  | 0.1441 | -1.19 | 0.3378 | 1.25  | 0.2261 | -1.14 | 0.7099 |
| 92957_at   | 1441350_at   | Fgf3          | fibroblast growth factor 3                      | 1.66  | 0.5  | -1.25 | 0.4627 | -1.32 | 0.3288 | -2.04 | 0.032  | 1.06  | 0.8585 |
| 92958_at   | 1434832_at   | Foxo3a        | forkhead box O3a                                | 1.18  | 0.04 | -1.07 | 0.1594 | -1.06 | 0.3591 | -1.09 | 0.0505 | -1.08 | 0.5454 |
| 92959_at   | 1426570_a_at | Frk           | fyn-related kinase                              | -3.42 | 0.21 | -1.18 | 0.6119 | -1.29 | 0.5139 | -1.28 | 0.4707 | 1.3   | 0.707  |
| 92960_at   | 1421206_at   | Lif           | leukemia inhibitory factor                      | -2.61 | 0.27 | 1.27  | 0.2561 | 2.19  | 0.1273 | 1.71  | 0.081  | 1.89  | 0.1549 |
| 92961_at   | 1421951_at   | Lhx1          | LIM homeobox protein 1                          | -1.5  | 0.5  | -1.02 | 0.9533 | 1.12  | 0.7171 | 1.05  | 0.8298 | -1.01 | 0.9796 |
| 92962_at   | 1449473_s_at | Tnfrsf5       | tumor necrosis factor receptor superfamily, r   | 1.02  | 0.82 | 1.07  | 0.8616 | -1.13 | 0.7988 | 1.22  | 0.6547 | 2.09  | 0.049  |
| 92963_at   | 1460234_at   | BC054822      | cDNA sequence BC054822                          | 1.06  | 0.79 | 1.15  | 0.0552 | -1.05 | 0.411  | 1.02  | 0.7917 | 1.11  | 0.3723 |
| 92967_r_at | 1420560_at   | Chrne         | cholinergic receptor, nicotinic, epsilon polyp  | -2.4  | 0.06 | -1.44 | 0.149  | -1.21 | 0.403  | -1.36 | 0.2102 | 1.54  | 0.0374 |
| 92968_at   | 1422807_at   | Arf5          | ADP-ribosylation factor 5                       | -1.02 | 0.88 | -1.06 | 0.5004 | -1.03 | 0.7319 | -1.09 | 0.1199 | -1.06 | 0.663  |
| 92969_at   | 1422738_at   | Ddr2          | discoidin domain receptor family, member 2      | -1.83 | 0.16 | -1.51 | 0.0069 | -1.44 | 0.074  | -1.38 | 0.0038 | -1.18 | 0.6638 |
| 92970_at   | 1431475_a_at | Hoxa10        | homeo box A10                                   | -3.93 | 0.31 | 1.2   | 0.5532 | -1.05 | 0.7096 | -1.09 | 0.5162 | 1.02  | 0.9711 |
| 92971_at   | 1428891_at   | 9130213B05Rik | RIKEN cDNA 9130213B05 gene                      | 1.4   | 0.51 | -1.15 | 0.613  | -1.06 | 0.8315 | 1.07  | 0.7541 | 2.95  | 0.0315 |
| 92972_at   | 1449869_at   | Vpreb1        | pre-B lymphocyte gene 1                         | -1.44 | 0.2  | 1.41  | 0.241  | 1.44  | 0.14   | 1.44  | 0.421  | -1.26 | 0.4325 |
| 92974_at   | 1419207_at   | Zfp37         | zinc finger protein 37                          | -1.02 | 0.97 | 1.29  | 0.4181 | 1.22  | 0.5324 | -1.19 | 0.6579 | 1.48  | 0.3363 |
| 92975_at   | 1448328_at   | Sh3bp2        | SH3-domain binding protein 2                    | 2.08  | 0.08 | 1.08  | 0.3904 | -1.34 | 0.0131 | -1.03 | 0.7964 | -2.04 | 0.0181 |
| 92976_at   | 1449251_at   | Ndph          | Norrie disease homolog                          | 1.98  | 0.4  | -1.14 | 0.6887 | 1.35  | 0.2268 | -1.19 | 0.5746 | 1.54  | 0.2958 |
| 92977_s_at | 1422150_at   | Hmx3          | H6 homeo box 3                                  | -1.84 | 0.16 | 1.21  | 0.3641 | -1.08 | 0.7701 | 1.03  | 0.9035 | 1.24  | 0.0603 |
| 92978_s_at | 1419082_at   | Serpinb2      | serine (or cysteine) proteinase inhibitor, clad | -1.85 | 0.13 | 1.11  | 0.4044 | -1.08 | 0.5422 | 1.05  | 0.7933 | 1.61  | 0.2492 |
| 92980_at   | 1418620_at   | Phox2a        | paired-like homeobox 2a                         | 1.08  | 0.68 | -1.03 | 0.825  | 1.53  | 0.2797 | 1.3   | 0.4065 | 1.02  | 0.9347 |
| 92981_at   | 1450708_at   | Scg2          | secretogranin II                                | -1.71 | 0.3  | -1.3  | 0.262  | -1.83 | 0.0733 | -1.35 | 0.2974 | 1.1   | 0.8697 |
| 92982_at   | 1449873_at   | Bmp8a         | bone morphogenetic protein 8a                   | -1.06 | 0.87 | -1.11 | 0.5775 | -1.2  | 0.4586 | -1.14 | 0.5826 | 1.26  | 0.6604 |
| 92984_g_at | 1425587_a_at | Ptprij        | protein tyrosine phosphatase, receptor type,    | -1.01 | 0.99 | -1.09 | 0.5528 | -1.12 | 0.5776 | -1.33 | 0.1266 | -1.19 | 0.3486 |
| 92986_g_at | 1427629_at   | Ptprij        | protein tyrosine phosphatase, receptor type,    | -1.69 | 0.01 | -1.01 | 0.9045 | 1.03  | 0.8166 | 1.02  | 0.8022 | 1.32  | 0.0052 |
| 92987_at   | 1418485_at   | Slc4a3        | solute carrier family 4 (anion exchanger), me   | 1.26  | 0.06 | -1.21 | 0.4179 | -1.13 | 0.6416 | -1.42 | 0.1423 | -1.23 | 0.6051 |
| 92989_f_at | 1448955_s_at | Cadps         | Ca<2+>dependent activator protein for secr      | -2.26 | 0.17 | 1.02  | 0.944  | -1.08 | 0.7246 | -1.18 | 0.4525 | -1.03 | 0.9505 |
| 92990_at   | 1418955_at   | Zfp93         | zinc finger protein 93                          | 1.69  | 0.17 | -1.1  | 0.6367 | -1.28 | 0.2602 | 1.04  | 0.8755 | 1.19  | 0.4526 |
| 92991_at   | 1421504_at   | Sp4           | trans-acting transcription factor 4             | 1.48  | 0.46 | -1.17 | 0.2286 | -1.24 | 0.2164 | -1.33 | 0.0483 | 1.15  | 0.7189 |
| 92993_r_at | 1437508_at   | 5730497N03Rik | RIKEN cDNA 5730497N03 gene                      | -1.18 | 0.81 | 1.09  | 0.375  | -1.67 | 0.0035 | -1.06 | 0.709  | 1.2   | 0.4853 |
| 92994_at   | 1418363_at   | Lalba         | lactalbumin, alpha                              | -1.23 | 0.31 | -1.05 | 0.7493 | -1.09 | 0.5366 | -1.23 | 0.2629 | 1.52  | 0.219  |
| 92996_at   | 1429177_x_at | Sox17         | SRY-box containing gene 17                      | 2.38  | 0.03 | 1.21  | 0.0618 | 1.21  | 0.0554 | 1.07  | 0.5455 | 1.28  | 0.4858 |
| 92997_g_at | 1421657_a_at | Sox17         | SRY-box containing gene 17                      | -3.01 | 0.21 | 1.19  | 0.1033 | 1.11  | 0.2585 | 1.34  | 0.0116 | 1.23  | 0.3513 |
| 92998_at   | 1421272_at   | Vav2          | Vav2 oncogene                                   | -2.96 | 0.01 | 1.05  | 0.6232 | -1.03 | 0.8609 | -1.4  | 0.0351 | -1.11 | 0.7976 |
| 93000_g_at | 1425767_a_at | Six4          | sine oculis-related homeobox 4 homolog (Di      | -1.3  | 0.57 | 1.19  | 0.4742 | 1.38  | 0.238  | 1.43  | 0.0881 | 1.54  | 0.3105 |
| 93002_r_at | 1450989_at   | Tdgf1         | teratocarcinoma-derived growth factor           | 2.82  | 0.04 | -1.05 | 0.8446 | 1.11  | 0.6052 | -1.2  | 0.381  | 1.18  | 0.4143 |
| 93004_r_at | 1424757_at   | BC018242      | cDNA sequence BC018242                          | -1.77 | 0.04 | -1.01 | 0.9271 | 1.04  | 0.5957 | 1.07  | 0.4243 | 1.14  | 0.2851 |

|            |              |                     |                                                |       |      |       |        |       |        |       |        |       |        |
|------------|--------------|---------------------|------------------------------------------------|-------|------|-------|--------|-------|--------|-------|--------|-------|--------|
| 93005_at   | 1421990_at   | Syt1                | synaptotagmin 1                                | 1.16  | 0.75 | -1.58 | 0.0072 | 1.09  | 0.6947 | -1.43 | 0.0571 | -1.09 | 0.8515 |
| 93006_at   | 1450661_x_at | Nfic                | nuclear factor I/C                             | 1.32  | 0.32 | -1.41 | 0.2469 | -3.18 | 0.0002 | -2.6  | 0.0039 | 1.12  | 0.8548 |
| 93007_at   | 1421471_at   | Npy1r               | neuropeptide Y receptor Y1                     | -1.57 | 0.13 | 1.05  | 0.6437 | -1.05 | 0.7317 | 1.09  | 0.4961 | 1.68  | 0.0754 |
| 93008_at   | 1448622_at   | Lsm4                | LSM4 homolog, U6 small nuclear RNA asso        | 1.49  | 0.47 | -1.14 | 0.0616 | 1.09  | 0.3705 | 1.04  | 0.5266 | 1.19  | 0.0607 |
| 93009_at   | 1416411_at   | Gstm2               | glutathione S-transferase, mu 2                | 1.06  | 0.66 | -1.02 | 0.9474 | -1.38 | 0.0512 | 1.14  | 0.5206 | -1.2  | 0.4637 |
| 93010_at   | 1417731_at   | Pqbp1               | polyglutamine binding protein 1                | 1.49  | 0.23 | 1.07  | 0.7889 | -1.3  | 0.3398 | 1.34  | 0.2077 | -2.73 | 0.1192 |
| 93011_at   | 1416419_s_at | Gabarapl1           | gamma-aminobutyric acid (GABA(A)) recept       | 1.34  | 0.09 | 1.39  | 0.0032 | 1.17  | 0.0616 | 1.41  | 0.0003 | 2.12  | 0      |
| 93013_at   | 1435176_a_at | Id2                 | inhibitor of DNA binding 2                     | -1.49 | 0.32 | 1.2   | 0.0843 | -1.07 | 0.6277 | 1.08  | 0.4119 | -1.82 | 0.0047 |
| 93014_at   | 1448203_at   | Atp5f1              | ATP synthase, H+ transporting, mitochondri     | -1.18 | 0.56 | 1.14  | 0.0127 | 1.22  | 0.0037 | 1.23  | 0.0042 | 1     | 0.9697 |
| 93015_at   | 1423437_at   | Gsta3               | glutathione S-transferase, alpha 3             | -1.19 | 0.18 | 1.13  | 0.0305 | -1.14 | 0.189  | 1.05  | 0.3095 | 1.1   | 0.2158 |
| 93016_at   | 1460621_x_at | Ywhaq               | tyrosine 3-monooxygenase/tryptophan 5-mo       | -1.28 | 0.39 | -1.07 | 0.718  | -1.4  | 0.175  | -1.65 | 0.0428 | 2.21  | 0.1282 |
| 93017_at   | 1450941_at   | ---                 | ---                                            | 1.3   | 0.38 | 1.08  | 0.5506 | 1.17  | 0.395  | 1.22  | 0.2066 | -1.58 | 0.149  |
| 93018_at   | 1417460_at   | Ifitm2              | interferon induced transmembrane protein 2     | -1.16 | 0.78 | -1.12 | 0.5911 | -1.21 | 0.3526 | -1.29 | 0.3269 | -1.06 | 0.8633 |
| 93019_at   | 1416746_at   | H2afx               | H2A histone family, member X                   | 1.04  | 0.8  | 1.11  | 0.1573 | 1.09  | 0.075  | 1.08  | 0.3179 | 1.12  | 0.5714 |
| 93020_at   | 1448595_a_at | Rex3                | reduced expression 3                           | 3.41  | 0.04 | 1.26  | 0.4777 | -1.03 | 0.9111 | -1.04 | 0.8845 | 1.3   | 0.5473 |
| 93021_at   | 1428209_at   | LOC406217           | RIKEN cDNA 2410004M13 gene                     | 1.95  | 0.07 | 1.37  | 0.03   | 1.23  | 0.1868 | 1.71  | 0.0012 | 2.01  | 0.0038 |
| 93023_f_at | 1460314_s_at | Hist2h3c1 /// Hist  | histone 2, H3c1 /// histone 2, H3c2 /// histon | -1.55 | 0.37 | -1.47 | 0.006  | -1.54 | 0.011  | -2    | 0.0002 | 1.47  | 0.3555 |
| 93025_at   | 1424821_at   | Ndfip1              | Nedd4 family interacting protein 1             | -1.26 | 0.1  | -1.14 | 0.0032 | -1.01 | 0.8384 | -1.23 | 0.0002 | -1.39 | 0.0273 |
| 93026_at   | 1415897_a_at | Mgst1               | microsomal glutathione S-transferase 1         | -1.38 | 0.17 | 1.11  | 0.3574 | -1.05 | 0.6457 | 1.1   | 0.2823 | -1.14 | 0.3608 |
| 93028_at   | 1448194_a_at | ---                 | ---                                            | 11.99 | 0.1  | 1.14  | 0.8404 | -2.58 | 0.2763 | 2.14  | 0.3001 | 25.04 | 0.0258 |
| 93029_at   | 1416789_at   | Idh3g               | isocitrate dehydrogenase 3 (NAD+), gamma       | 1.78  | 0.02 | 1.1   | 0.0919 | 1.11  | 0.0207 | 1.26  | 0.0011 | 1.05  | 0.5184 |
| 93030_at   | 1449196_a_at | Rps27a              | ribosomal protein S27a                         | 1.11  | 0.57 | 1.09  | 0.0352 | 1.18  | 0.0376 | 1.13  | 0.0031 | 1.19  | 0.3433 |
| 93033_at   | 1448671_at   | Ube2e3              | ubiquitin-conjugating enzyme E2E 3, UBC4/      | -2.42 | 0.05 | -1.42 | 0.0249 | -1.34 | 0.1454 | -1.82 | 0.0007 | 1.15  | 0.6671 |
| 93038_f_at | 1448213_at   | Anxa1               | annexin A1                                     | 1.23  | 0.48 | 1.17  | 0.2725 | -1.05 | 0.8379 | 1.4   | 0.1533 | 1.18  | 0.619  |
| 93039_at   | 1416441_at   | MGI:1889205         | plasma glutamate carboxypeptidase              | 1.05  | 0.84 | -1.05 | 0.3388 | 1.03  | 0.8438 | -1.25 | 0.0077 | -1.18 | 0.1114 |
| 93040_at   | 1421374_a_at | Fxyd1               | FXYD domain-containing ion transport regul     | -1.36 | 0.28 | -1.1  | 0.0668 | -1.17 | 0.0867 | -1.19 | 0.0273 | -1.06 | 0.4573 |
| 93041_at   | 1416214_at   | Mcm4                | minichromosome maintenance deficient 4 h       | 1.52  | 0.48 | 1.24  | 0.1955 | -1.3  | 0.055  | 1.11  | 0.4298 | 1.15  | 0.3612 |
| 93042_at   | 1416695_at   | Bzrp                | benzodiazepine receptor, peripheral            | 1.01  | 0.97 | -1.09 | 0.2936 | 1.11  | 0.3366 | 1.05  | 0.6388 | -1.07 | 0.6519 |
| 93043_at   | 1415821_at   | Sdfr1               | stromal cell derived factor receptor 1         | 1.48  | 0    | 1.15  | 0.0623 | 1.14  | 0.2497 | 1.16  | 0.0111 | 1.03  | 0.8641 |
| 93045_at   | 1416679_at   | Abcd3               | ATP-binding cassette, sub-family D (ALD), n    | 1.1   | 0.46 | -1.25 | 0.0013 | -1.11 | 0.1793 | -1.22 | 0.0698 | -2.65 | 0.0001 |
| 93046_at   | 1428328_at   | Nup50               | nucleoporin 50                                 | 1.63  | 0.2  | 1.09  | 0.4742 | 1.31  | 0.1787 | 1.01  | 0.9133 | -1.33 | 0.2876 |
| 93048_at   | 1416616_s_at | Clpp                | caseinolytic protease, ATP-dependent, prote    | 1.36  | 0.02 | 1.08  | 0.334  | 1.12  | 0.1807 | 1.18  | 0.079  | 1.16  | 0.2491 |
| 93050_at   | 1448394_at   | Myl2                | myosin, light polypeptide 2, regulatory, cardi | 1.01  | 0.99 | -1.21 | 0.3465 | 1.1   | 0.672  | -1.19 | 0.3455 | 1.38  | 0.3391 |
| 93051_at   | 1448499_a_at | Ephx2               | epoxide hydrolase 2, cytoplasmic               | 1.23  | 0.12 | 1.71  | 0.0001 | 1.35  | 0.0152 | 1.83  | 0.0001 | -1.39 | 0.0421 |
| 93053_at   | 1422529_s_at | Casq2               | calsequestrin 2                                | 1     | 1    | -1.01 | 0.9696 | -1.24 | 0.3461 | -1.85 | 0.011  | -1.08 | 0.7848 |
| 93054_at   | 1428063_at   | 1110054N06Rik       | RIKEN cDNA 1110054N06 gene                     | -1.49 | 0.14 | -1.14 | 0.2578 | -1.1  | 0.2021 | -1.13 | 0.1952 | -1.3  | 0.2136 |
| 93057_at   | 1449643_s_at | Btf3                | basic transcription factor 3                   | 1.23  | 0.24 | -1.06 | 0.1936 | 1.11  | 0.2769 | 1.05  | 0.2969 | 1.39  | 0.1593 |
| 93058_at   | 1424343_a_at | Elf1a               | eukaryotic translation initiation factor 1A    | 1.13  | 0.56 | 1.49  | 0.0045 | 1.12  | 0.2795 | 1.58  | 0.0103 | 1.02  | 0.9164 |
| 93061_at   | 1418393_a_at | Irga7               | integrin alpha 7                               | -1.52 | 0.45 | -1.05 | 0.7116 | -1.09 | 0.5426 | 1.12  | 0.3554 | 1.57  | 0.2081 |
| 93062_at   | 1448909_a_at | Mrpl39              | mitochondrial ribosomal protein L39            | 2.14  | 0.02 | -1.01 | 0.8334 | 1.01  | 0.8775 | -1.07 | 0.1224 | -1.23 | 0.107  |
| 93063_at   | 1427442_a_at | App                 | amyloid beta (A4) precursor protein            | -1.38 | 0.26 | 1.48  | 0      | 1.16  | 0.0329 | 1.5   | 0.0002 | 2.24  | 0.0005 |
| 93064_at   | 1422490_at   | Bnip2               | BCL2/adenovirus E1B 19kDa-interacting pro      | 2.19  | 0.05 | 1.35  | 0.0006 | 1.12  | 0.1526 | 1.41  | 0.0001 | 2.11  | 0.0003 |
| 93066_at   | 1448148_at   | Grn                 | granulin                                       | -1.07 | 0.63 | -1.33 | 0.004  | 1.02  | 0.7984 | -1.26 | 0.066  | -1.22 | 0.0993 |
| 93068_r_at | 1418367_x_at | Hist2h2aa1 /// Hist | histone 2, H2aa1 /// histone 1, H2ad /// histo | 1.64  | 0.12 | -1.91 | 0.0187 | -1.21 | 0.4566 | -1.61 | 0.0619 | 1.14  | 0.0871 |
| 93069_at   | 1448356_at   | Ube2d2              | ubiquitin-conjugating enzyme E2D 2             | 1.06  | 0.75 | -1.09 | 0.3165 | -1.64 | 0.0008 | -1.62 | 0.0001 | -1.39 | 0.0807 |
| 93070_at   | 1426946_at   | Ranbp5              | RAN binding protein 5                          | 1.61  | 0.23 | -1.02 | 0.8546 | -1.09 | 0.4865 | 1.13  | 0.03   | -1.57 | 0.0604 |
| 93071_at   | 1415869_a_at | Trim28              | tripartite motif protein 28                    | 1.04  | 0.71 | 1.12  | 0.1196 | 1.02  | 0.834  | 1.2   | 0.0129 | 1.38  | 0.0331 |
| 93075_r_at | 1425990_a_at | Nfatc2              | nuclear factor of activated T-cells, cytoplasm | -2.57 | 0.01 | 1.22  | 0.5672 | 1.23  | 0.628  | 1.07  | 0.8395 | 1.96  | 0.3293 |
| 93076_at   | 1428537_at   | Csnk1a1             | casein kinase 1, alpha 1                       | 1.12  | 0.49 | 1.01  | 0.766  | -1.05 | 0.5544 | -1.02 | 0.639  | 1.1   | 0.4352 |
| 93077_s_at | 1421571_a_at | Ly6c                | lymphocyte antigen 6 complex, locus C          | -1.51 | 0.06 | 1.07  | 0.3822 | -1.07 | 0.4127 | 1.12  | 0.4458 | 1.06  | 0.5606 |
| 93078_at   | 1417185_at   | Ly6a                | lymphocyte antigen 6 complex, locus C          | 1.06  | 0.62 | 1.54  | 0.4595 | -1.49 | 0.0638 | 1.35  | 0.6424 | -3.83 | 0.0005 |
| 93080_at   | 1420632_a_at | Bscl2               | Bernardinelli-Seip congenital lipodystrophy 2  | 1.02  | 0.86 | -1.03 | 0.5361 | -1.02 | 0.7771 | -1.04 | 0.4809 | -1.16 | 0.1979 |
| 93081_at   | 1415775_at   | Rbbp7               | retinoblastoma binding protein 7               | 1.1   | 0.43 | 1.15  | 0.0066 | 1     | 0.9455 | 1.19  | 0.0039 | 1.07  | 0.3555 |

|            |              |               |                                                  |       |      |       |        |       |        |       |        |       |        |
|------------|--------------|---------------|--------------------------------------------------|-------|------|-------|--------|-------|--------|-------|--------|-------|--------|
| 93082_at   | 1422032_a_at | Za20d3        | zinc finger, A20 domain containing 3             | -1.15 | 0.37 | 1.02  | 0.6872 | 1.3   | 0.0028 | 1.2   | 0.0029 | -1.1  | 0.5352 |
| 93083_at   | 1425567_a_at | Anxa5         | annexin A5                                       | -1.22 | 0.53 | 1.39  | 0.1149 | 1.33  | 0.0019 | 1.74  | 0.0361 | -1.06 | 0.5958 |
| 93084_at   | 1455069_x_at | Slc25a4       | solute carrier family 25 (mitochondrial carrier) | 3.14  | 0.01 | -1.29 | 0.3875 | -1.35 | 0.3057 | 1.11  | 0.6745 | 1.63  | 0.179  |
| 93085_at   | 1450696_at   | Psmb9         | proteasome (prosome, macropain) subunit, l       | -1.09 | 0.6  | 1.49  | 0.4621 | -2.08 | 0.0069 | 1.6   | 0.3379 | -1.8  | 0.1486 |
| 93086_at   | 1452463_x_at | Igk-V8        | immunoglobulin kappa chain, constant regio       | 2.17  | 0.11 | 2.12  | 0.0481 | -1.42 | 0.5907 | 1.53  | 0.3459 | 3.74  | 0.006  |
| 93088_at   | 1449289_a_at | B2m           | beta-2 microglobulin                             | -1.37 | 0.05 | 1.02  | 0.7841 | -1.09 | 0.2357 | 1.01  | 0.9323 | -1.13 | 0.2438 |
| 93089_at   | 1450934_at   | Eif4a2        | eukaryotic translation initiation factor 4A2     | -1.41 | 0.29 | -1.23 | 0.0052 | -1.14 | 0.0292 | -1.3  | 0.0077 | 1.04  | 0.8057 |
| 93090_at   | 1433489_s_at | ---           | ---                                              | 1.04  | 0.78 | 1.01  | 0.9429 | -1.02 | 0.836  | 1.18  | 0.0843 | 1.05  | 0.8453 |
| 93091_s_at | 1420847_a_at | Fgfr2         | fibroblast growth factor receptor 2              | 1.61  | 0.31 | 1.12  | 0.3361 | 1.08  | 0.5821 | 1.09  | 0.4175 | 1.72  | 0.3202 |
| 93092_at   | 1422527_at   | H2-DMa        | histocompatibility 2, class II, locus DMA        | 1.23  | 0.7  | 2.31  | 0.1615 | -1.56 | 0.045  | 2.2   | 0.2304 | 2.01  | 0.1    |
| 93093_at   | 1416880_at   | Mcl1          | myeloid cell leukemia sequence 1                 | 2.48  | 0.01 | 1.2   | 0.0875 | 1.02  | 0.7978 | 1.35  | 0.0047 | 1.66  | 0.0064 |
| 93094_at   | 1417430_at   | Cdr2          | cerebellar degeneration-related 2                | -1.05 | 0.88 | -1.1  | 0.6824 | 1.13  | 0.5448 | -1.23 | 0.1605 | -1.44 | 0.3044 |
| 93095_at   | 1416176_at   | Hmgb1         | high mobility group box 1                        | -1.36 | 0.11 | -1.03 | 0.6916 | 1.08  | 0.4415 | -1.06 | 0.5409 | -1.28 | 0.0896 |
| 93096_at   | 1416025_at   | Fgg           | fibrinogen, gamma polypeptide                    | -1.32 | 0.09 | 1.11  | 0.1701 | 1.1   | 0.2518 | -1.32 | 0.3722 | -1.24 | 0.2303 |
| 93097_at   | 1419549_at   | Arg1          | arginase 1, liver                                | 1.22  | 0.33 | 1.1   | 0.0355 | -1.01 | 0.8354 | 1.16  | 0.0015 | -1.31 | 0.0774 |
| 93099_f_at | 1448191_at   | Plk1          | polo-like kinase 1 (Drosophila)                  | -1.74 | 0.34 | 1.17  | 0.4215 | 1.46  | 0.12   | 1.92  | 0.0086 | 1.52  | 0.1071 |
| 93100_at   | 1416454_s_at | Acta2         | actin, alpha 2, smooth muscle, aorta             | 1.53  | 0.11 | -1.07 | 0.8883 | -1.1  | 0.8515 | -1.06 | 0.9126 | 1.51  | 0.1748 |
| 93101_s_at | 1450431_a_at | Nedd4         | neural precursor cell expressed, developme       | -1.34 | 0.13 | 1.14  | 0.0204 | 1.03  | 0.5194 | 1.2   | 0.0079 | 1.03  | 0.74   |
| 93102_f_at | 1422340_a_at | Actg2         | actin, gamma 2, smooth muscle, enteric           | 1.08  | 0.65 | -1.18 | 0.0536 | -1.37 | 0.0001 | -1.28 | 0.0074 | 1.46  | 0.1477 |
| 93103_at   | 1415847_at   | Ldh3          | lactate dehydrogenase 3, C chain, sperm sp       | 1.23  | 0.36 | 1.02  | 0.8863 | 1.26  | 0.0788 | 1.14  | 0.302  | 1.03  | 0.918  |
| 93104_at   | 1426083_a_at | Btg1          | B-cell translocation gene 1, anti-proliferative  | 1.4   | 0.01 | 1.7   | 0.0003 | -1.01 | 0.9192 | 1.44  | 0.0395 | 1.67  | 0.0079 |
| 93105_s_at | 1452205_x_at | Tcrb-V13      | T-cell receptor beta, variable 13                | 1.07  | 0.65 | 1.29  | 0.0276 | -1.14 | 0.1229 | 1.15  | 0.2562 | 1.48  | 0.0075 |
| 93107_r_at | 1426772_x_at | LOC381765     | similar to T cell antigen receptor               | -1.83 | 0.55 | -1.1  | 0.7738 | -1.01 | 0.9875 | 1.19  | 0.6206 | 1.2   | 0.8264 |
| 93111_at   | 1448526_at   | Kpnb1         | karyopherin (importin) beta 1                    | 1.33  | 0.14 | -1.19 | 0.0196 | -1.16 | 0.0518 | -1.36 | 0.0004 | -1.29 | 0.0035 |
| 93112_at   | 1448777_at   | Mcm2          | minichromosome maintenance deficient 2 m         | -1.16 | 0.69 | 1.21  | 0.0511 | -1.03 | 0.7735 | 1.05  | 0.4768 | 1.3   | 0.1976 |
| 93116_at   | 1420611_at   | Prkacb        | protein kinase, cAMP dependent, catalytic, t     | -1.04 | 0.58 | -1.04 | 0.4911 | -1.07 | 0.223  | -1.06 | 0.2756 | 1.1   | 0.5022 |
| 93117_at   | 1420365_a_at | Hnrpa2b1      | heterogeneous nuclear ribonucleoprotein A2       | -1.33 | 0.05 | -1.03 | 0.5908 | 1.11  | 0.0825 | 1.05  | 0.1774 | -1.3  | 0.1687 |
| 93118_at   | 1433829_a_at | Hnrpa2b1      | heterogeneous nuclear ribonucleoprotein A2       | 1.37  | 0.08 | 1.41  | 0.0012 | 1.1   | 0.4518 | 1.48  | 0      | 1.34  | 0.0034 |
| 93119_at   | 1416902_a_at | Cox5b         | cytochrome c oxidase, subunit Vb                 | 1.56  | 0.01 | 1.04  | 0.3885 | -1.02 | 0.7033 | 1.15  | 0.0221 | 1     | 0.9554 |
| 93120_f_at | 1425336_x_at | H2-K1         | histocompatibility 2, K1, K region               | -1.08 | 0.15 | 1.14  | 0.3272 | -1.12 | 0.0217 | 1.16  | 0.2911 | -1.27 | 0.0937 |
| 93122_at   | 1416325_at   | Crisp1        | cysteine-rich secretory protein 1                | 1.9   | 0.35 | 1.62  | 0.2573 | -1.11 | 0.4037 | 1.18  | 0.1118 | 1.14  | 0.7079 |
| 93126_at   | 1455106_a_at | Ckb           | creatine kinase, brain                           | -1.14 | 0.38 | -1.14 | 0.0776 | -1.12 | 0.227  | -1.04 | 0.6594 | 1.2   | 0.3668 |
| 93127_at   | 1426658_x_at | Phgdh         | 3-phosphoglycerate dehydrogenase                 | -1.18 | 0.68 | -1.32 | 0.1579 | -1.01 | 0.9746 | -1.22 | 0.3213 | 1.28  | 0.4194 |
| 93128_at   | 1426054_at   | Npy1r         | neuropeptide Y receptor Y1                       | -1.4  | 0.28 | -1.11 | 0.4453 | -1.14 | 0.3384 | -1.17 | 0.1938 | 1.04  | 0.8328 |
| 93129_at   | 1450181_at   | Cutl2         | cut-like 2 (Drosophila)                          | -1.08 | 0.74 | -7.38 | 0.0007 | 1.66  | 0.1119 | -8.34 | 0.0006 | -1.13 | 0.6139 |
| 93130_at   | 1456117_at   | 2600005C20Rik | RIKEN cDNA 2600005C20 gene                       | -1.46 | 0.07 | -1.02 | 0.7336 | -1.28 | 0.0271 | -1.03 | 0.5996 | 1.3   | 0.0626 |
| 93132_at   | 1427676_a_at | Grik1         | Glutamate receptor, ionotropic, kainate 1        | 1.44  | 0.43 | 1.36  | 0.4387 | 2.03  | 0.1863 | 1.42  | 0.1343 | 1.07  | 0.915  |
| 93133_at   | 1417022_at   | Slc7a3        | solute carrier family 7 (cationic amino acid tr  | -1.36 | 0.28 | 1.2   | 0.3376 | 1.07  | 0.7686 | 1.14  | 0.4981 | -1.06 | 0.8896 |
| 93134_at   | 1422130_at   | Nptx1         | neuronal pentraxin 1                             | -2.45 | 0.07 | 1.4   | 0.0534 | 1.15  | 0.5009 | 1.12  | 0.6902 | 2.32  | 0.1186 |
| 93136_at   | 1421114_a_at | Dspg3         | dermatan sulphate proteoglycan 3                 | -1.65 | 0.34 | 1.25  | 0.5195 | 1.73  | 0.0659 | 2.57  | 0.0655 | 1.37  | 0.2569 |
| 93137_at   | 1417151_a_at | Ntsr2         | neurotensin receptor 2                           | 2.6   | 0.11 | 1.33  | 0.3183 | 1.05  | 0.8386 | 1.14  | 0.5866 | 1.79  | 0.063  |
| 93138_at   | 1428515_at   | 2410012H22Rik | RIKEN cDNA 2410012H22 gene                       | 1.46  | 0.07 | 1.01  | 0.8648 | 1.01  | 0.849  | 1.09  | 0.1476 | 1.19  | 0.0835 |
| 93139_at   | 1418490_at   | Sdsl          | serine dehydratase-like                          | -1.04 | 0.82 | 1.04  | 0.5992 | 1.12  | 0.4557 | 1.14  | 0.0259 | -1.17 | 0.4799 |
| 93140_at   | 1420439_at   | Tsx           | testis specific X-linked gene                    | 1.28  | 0.66 | 1.78  | 0.1138 | 1.55  | 0.2475 | 1.74  | 0.0987 | 1.03  | 0.9543 |
| 93141_at   | 1417760_at   | Nr0b1         | nuclear receptor subfamily 0, group B, mem       | -2.08 | 0.17 | -1.34 | 0.2018 | -1.44 | 0.0977 | -1.45 | 0.152  | 2.23  | 0.082  |
| 93142_at   | 1449311_at   | Bach1         | BTB and CNC homology 1                           | -1.07 | 0.49 | 2.39  | 0.1393 | -1.36 | 0.2635 | -1.42 | 0.2174 | -1.3  | 0.6592 |
| 93143_at   | 1452609_at   | 1190005106Rik | RIKEN cDNA 1190005106 gene                       | 1.14  | 0.62 | 1.24  | 0.0225 | 1.12  | 0.0271 | 1.23  | 0.0041 | 2.22  | 0.0013 |
| 93144_at   | 1434335_at   | Al317237      | expressed sequence Al317237                      | 1.19  | 0.1  | 1.03  | 0.7095 | 1.25  | 0.0603 | 1.24  | 0.0658 | 1.26  | 0.0197 |
| 93145_at   | 1455505_at   | ---           | Transcribed locus                                | 1.15  | 0.48 | 1.04  | 0.7744 | 1.08  | 0.3946 | 1.14  | 0.2078 | 1.18  | 0.1747 |
| 93147_f_at | 1452240_at   | Brunol4       | bruno-like 4, RNA binding protein (Drosophil     | -1.25 | 0.2  | -1.28 | 0.1579 | -1.18 | 0.3696 | -1.33 | 0.0626 | 1.52  | 0.3698 |
| 93148_at   | 1428862_at   | Ttc17         | tetratricopeptide repeat domain 17               | 1.05  | 0.86 | 1.23  | 0.1178 | 1.44  | 0.0139 | 1.28  | 0.0565 | 1.14  | 0.3869 |
| 93151_at   | 1449921_s_at | Cpne6         | copine VI                                        | -1.06 | 0.85 | 1.43  | 0.0996 | 1.12  | 0.6643 | 1.01  | 0.9641 | 1.14  | 0.675  |
| 93153_at   | 1434932_at   | ---           | ---                                              | 1.04  | 0.63 | -1.18 | 0.0365 | 1.09  | 0.2433 | -1.13 | 0.1262 | 1.14  | 0.5007 |

|            |              |                  |                                                  |       |      |       |        |       |        |       |        |       |        |
|------------|--------------|------------------|--------------------------------------------------|-------|------|-------|--------|-------|--------|-------|--------|-------|--------|
| 93155_at   | 1436243_at   | A930004K21Rik    | RIKEN cDNA A930004K21 gene                       | -1.17 | 0.8  | 1.19  | 0.161  | 1.14  | 0.5288 | 1.01  | 0.9719 | 1.58  | 0.0906 |
| 93158_at   | 1434992_at   | 9130206N08Rik    | RIKEN cDNA 9130206N08 gene                       | -1.24 | 0.7  | 1.33  | 0.1106 | 1.07  | 0.6868 | -1.32 | 0.1846 | 1.42  | 0.2704 |
| 93159_at   | 1440323_at   | ---              | ---                                              | 1.01  | 0.99 | 1.08  | 0.6794 | 1.25  | 0.1656 | 1.12  | 0.5717 | -1.13 | 0.6994 |
| 93162_f_at | 1425122_at   | ORF9             | open reading frame 9                             | -1.13 | 0.63 | -1.09 | 0.6035 | 1.05  | 0.8073 | 1.12  | 0.6744 | -1.24 | 0.5131 |
| 93165_at   | 1460438_at   | 2610022K04Rik    | RIKEN cDNA 2610022K04 gene                       | 1.44  | 0.17 | 1.06  | 0.582  | 1.25  | 0.0862 | 1.23  | 0.1035 | 2.35  | 0.134  |
| 93166_at   | 1447962_at   | ---              | Transcribed locus                                | 1.47  | 0.57 | 1.64  | 0.1687 | -1.23 | 0.4819 | -1.15 | 0.6879 | 1.4   | 0.314  |
| 93167_f_at | 1419534_at   | ---              | ---                                              | 1.51  | 0.29 | -1.53 | 0.0749 | -1.69 | 0.0074 | -1.54 | 0.0385 | 3.21  | 0.0181 |
| 93173_at   | 1417881_at   | Slc39a3          | solute carrier family 39 (zinc transporter), mem | 1.15  | 0.76 | -1.05 | 0.8388 | -1.3  | 0.2453 | -1.15 | 0.5764 | 1.61  | 0.0501 |
| 93175_at   | 1454678_s_at | A130022J15Rik    | RIKEN cDNA A130022J15 gene                       | -1.36 | 0.32 | -1.12 | 0.1543 | -1.01 | 0.9176 | -1.05 | 0.5367 | 1.03  | 0.8828 |
| 93177_at   | 1436228_at   | Zranb1           | zinc finger, RAN-binding domain containing       | 1.46  | 0.26 | 1.09  | 0.5187 | 1.16  | 0.3803 | 1.31  | 0.0148 | 1.04  | 0.8508 |
| 93178_at   | 1448978_at   | Ngef             | neuronal guanine nucleotide exchange factor      | 1.44  | 0.01 | -1.03 | 0.749  | -1.3  | 0.0113 | -1.24 | 0.0304 | 1.78  | 0.0008 |
| 93179_at   | 1455350_at   | B830009D23Rik    | RIKEN cDNA B830009D23 gene                       | -1.01 | 0.97 | -1.2  | 0.188  | -1.22 | 0.1093 | -1.02 | 0.9113 | -1.09 | 0.5391 |
| 93180_at   | 1439483_at   | AI506816         | expressed sequence AI506816                      | -1.08 | 0.83 | 1.01  | 0.903  | 1.17  | 0.0151 | 1.06  | 0.3982 | 1.17  | 0.6778 |
| 93183_at   | 1439350_s_at | Cdc9111          | CDC91 cell division cycle 91-like 1 (S. cerev    | 1.03  | 0.85 | 1.11  | 0.2401 | 1.03  | 0.7973 | 1.11  | 0.3632 | 1.14  | 0.5326 |
| 93184_at   | 1434224_at   | Tbl2             | transducin (beta)-like 2                         | -1.13 | 0.81 | 1.04  | 0.6601 | 1.1   | 0.2872 | -1.03 | 0.7201 | -1.2  | 0.263  |
| 93185_at   | 1437661_at   | LOC239691        | similar to SARG904                               | 1.43  | 0.06 | -1.12 | 0.3325 | -1.17 | 0.2143 | -1.08 | 0.6499 | 1.56  | 0.0158 |
| 93187_at   | 1426784_at   | Trim47           | tripartite motif protein 47                      | 1.08  | 0.71 | -1.02 | 0.8251 | 1.04  | 0.5517 | 1.03  | 0.601  | 1.19  | 0.1768 |
| 93188_at   | 1417312_at   | Dkk3             | dickkopf homolog 3 (Xenopus laevis)              | -1.21 | 0.67 | 1.08  | 0.6398 | -1.05 | 0.7328 | -1.11 | 0.4959 | 1.55  | 0.3957 |
| 93190_at   | 1435013_at   | MGC60818         | similar to hypothetical protein FLJ20397         | 1.12  | 0.62 | 1.02  | 0.7531 | 1.11  | 0.1997 | 1.12  | 0.0334 | 1.1   | 0.525  |
| 93191_at   | 1434796_at   | Vamp4            | vesicle-associated membrane protein 4            | 1.56  | 0.02 | 1.16  | 0.0646 | 1.14  | 0.2979 | 1.16  | 0.2362 | 1.27  | 0.1363 |
| 93193_at   | 1437302_at   | Adrb2            | adrenergic receptor, beta 2                      | -1.24 | 0.6  | -1.08 | 0.4708 | 1.08  | 0.693  | 1.24  | 0.1007 | 1.28  | 0.1813 |
| 93194_at   | 1449156_at   | Ly9              | lymphocyte antigen 9                             | 1.43  | 0.7  | 1.32  | 0.0484 | 1.16  | 0.3631 | 1.63  | 0.1396 | 2.05  | 0.2279 |
| 93195_at   | 1429005_at   | Mfhas1           | malignant fibrous histiocytoma amplified seq     | 1.06  | 0.8  | -1.22 | 0.2197 | 1.12  | 0.4816 | -1.6  | 0.0177 | 1.04  | 0.8688 |
| 93198_at   | 1418806_at   | Csf3r            | colony stimulating factor 3 receptor (granulo    | -4.65 | 0.12 | -1.07 | 0.7916 | -1.15 | 0.6353 | 1.48  | 0.4113 | 1.46  | 0.1445 |
| 93199_at   | 1452488_at   | Dnajc8           | DnaJ (Hsp40) homolog, subfamily C, memb          | 1.08  | 0.91 | -1.23 | 0.2858 | -1.31 | 0.1089 | -1.46 | 0.0362 | 1.53  | 0.2829 |
| 93200_f_at | 1422956_at   | D1Pas1           | DNA segment, Chr 1, Pasteur Institute 1          | -3.88 | 0.09 | 1.49  | 0.2877 | 1.19  | 0.6581 | -1.19 | 0.5781 | -1.28 | 0.6064 |
| 93201_at   | 1437693_at   | D1Pas1           | DNA segment, Chr 1, Pasteur Institute 1          | -2.22 | 0.2  | -1.33 | 0.2825 | -1.38 | 0.2625 | -1.38 | 0.2183 | 2.32  | 0.3552 |
| 93202_at   | 1422974_at   | Nt5e             | 5' nucleotidase, ecto                            | 1.25  | 0.61 | -2.16 | 0.0001 | -1.34 | 0.033  | -3.38 | 0      | 1.16  | 0.2109 |
| 93204_r_at | 1454831_at   | 3230402J05Rik    | RIKEN cDNA 3230402J05 gene                       | -2.19 | 0.44 | 1.18  | 0.648  | -1.16 | 0.6825 | 1.01  | 0.9729 | 1.61  | 0.2547 |
| 93207_at   | 1449895_at   | Acr              | preproacrosin                                    | -1.98 | 0.13 | 1.07  | 0.4779 | 1.02  | 0.8251 | 1.15  | 0.4364 | 1.62  | 0.0038 |
| 93208_at   | 1422682_s_at | Prss3 /// Trygn1 | protease, serine, 3 /// trypsinogen 16           | -1.38 | 0.2  | -1.95 | 0.1314 | -1.44 | 0.3653 | -1.58 | 0.2319 | 2.36  | 0.0471 |
| 93210_g_at | 1427639_a_at | Nek4             | NIMA (never in mitosis gene a)-related expr      | -1.25 | 0.66 | -1.1  | 0.5725 | -1.34 | 0.0499 | -1.53 | 0.0126 | -1.86 | 0.207  |
| 93213_at   | 1425871_a_at | LOC384413 /// I  | similar to immunoglobulin light chain variabl    | -1    | 0.99 | -1.35 | 0.1028 | 1.02  | 0.9384 | -1.16 | 0.5141 | 2.13  | 0.0596 |
| 93214_at   | 1427763_a_at | Camk2d           | calcium/calmodulin-dependent protein kinas       | -2.57 | 0.39 | 1.23  | 0.5748 | 1.7   | 0.4158 | 1.22  | 0.5856 | 1.15  | 0.4904 |
| 93216_at   | 1449826_a_at | Fgf2             | fibroblast growth factor 2                       | 1.12  | 0.86 | 1.33  | 0.328  | -1.28 | 0.0882 | 1.6   | 0.2277 | 1.46  | 0.3733 |
| 93217_at   | 1452895_at   | Fbxo45           | F-box protein 45                                 | 1.21  | 0.06 | 1.09  | 0.3814 | 1.2   | 0.2749 | 1.16  | 0.1891 | 1.31  | 0.1454 |
| 93220_at   | 1425475_at   | Col4a5           | procollagen, type IV, alpha 5                    | -1.32 | 0.32 | 3.16  | 0      | 1.7   | 0.0853 | 4.37  | 0      | 1.06  | 0.9141 |
| 93221_at   | 1431099_at   | Hoxd8            | homeo box D8                                     | 1.13  | 0.5  | -1.58 | 0.2067 | -1.14 | 0.7054 | -1.92 | 0.1083 | -1.12 | 0.7072 |
| 93224_at   | 1427766_at   | ---              | Similar to T cell receptor V alpha 8.5           | -2.28 | 0.08 | 1.4   | 0.1773 | 1.24  | 0.3905 | 1.34  | 0.2135 | -1.17 | 0.7577 |
| 93225_s_at | 1422333_at   | Cyp21a1          | cytochrome P450, family 21, subfamily a, pc      | -1.13 | 0.19 | -1.14 | 0.0254 | -1.19 | 0.0169 | -1.29 | 0.0001 | 1.19  | 0.2096 |
| 93230_at   | 1450836_at   | Neurog1          | neurogenin 1                                     | -1.63 | 0.06 | 1.23  | 0.2026 | 1.09  | 0.5861 | 1.09  | 0.3616 | 1.06  | 0.7648 |
| 93232_at   | 1435259_s_at | D2Erttd217e      | DNA segment, Chr 2, ERATO Doi 217, expr          | 1.17  | 0.18 | 1.17  | 0.1171 | 1.15  | 0.2153 | 1.21  | 0.088  | -1.45 | 0.0097 |
| 93234_at   | 1418417_at   | Msc              | musculin                                         | -1.21 | 0.65 | -1.22 | 0.6404 | -1.76 | 0.1951 | -1.33 | 0.4382 | -1.33 | 0.4382 |
| 93241_r_at | 1434842_s_at | Upf3b            | UPF3 regulator of nonsense transcripts hom       | 1.18  | 0.65 | 1.29  | 0.0891 | 1.52  | 0.0738 | 1.46  | 0.0906 | 1.09  | 0.7753 |
| 93242_at   | 1422913_at   | BC061127         | cDNA sequence BC061127                           | -2.07 | 0.03 | 1.04  | 0.8653 | 1.19  | 0.6713 | 1.08  | 0.7466 | -1.05 | 0.8492 |
| 93243_at   | 1418910_at   | Bmp7             | bone morphogenetic protein 7                     | 2.37  | 0.32 | 1.29  | 0.0701 | 1.16  | 0.2713 | 1.13  | 0.3198 | 1.1   | 0.7409 |
| 93244_at   | 1425161_a_at | 5730502D15Rik    | RIKEN cDNA 5730502D15 gene                       | 1.56  | 0.04 | -1.48 | 0.0666 | -1.17 | 0.4876 | -1.26 | 0.3151 | -1.63 | 0.4117 |
| 93245_at   | 1439810_s_at | Pramel7          | preferentially expressed antigen in melanom      | 1.34  | 0.24 | -1.23 | 0.0317 | -1.21 | 0.2999 | -1.33 | 0.0547 | 1.5   | 0.0623 |
| 93246_at   | 1418024_at   | Narg1            | NMDA receptor-regulated gene 1                   | 1.09  | 0.86 | 1.1   | 0.3462 | -1.41 | 0.0403 | -1.35 | 0.0121 | -1.25 | 0.0077 |
| 93250_r_at | 1437313_x_at | Hmgb2            | high mobility group box 2                        | -1.11 | 0.86 | 2.08  | 0.0206 | -1.48 | 0.1862 | 1.34  | 0.2126 | 4.19  | 0.0809 |
| 93252_at   | 1456279_a_at | Bcap31           | B-cell receptor-associated protein 31            | 1.07  | 0.68 | -1.18 | 0.008  | -1.16 | 0.0021 | -1.24 | 0.0011 | -1.35 | 0.04   |
| 93253_at   | 1419568_at   | Mapk1            | mitogen activated protein kinase 1               | 2.93  | 0.01 | 1.01  | 0.9637 | -1.68 | 0.0071 | -1.51 | 0.0283 | -1.4  | 0.3432 |
| 93254_at   | 1426585_s_at | Mapk1            | mitogen activated protein kinase 1               | 1     | 1    | 1.12  | 0.0002 | 1.12  | 0.0056 | 1.06  | 0.1422 | 1.05  | 0.485  |

|            |              |               |                                              |       |      |       |        |       |        |       |        |       |        |
|------------|--------------|---------------|----------------------------------------------|-------|------|-------|--------|-------|--------|-------|--------|-------|--------|
| 93255_at   | 1448634_at   | Ralbp1        | ralA binding protein 1                       | -1.23 | 0.43 | -1.02 | 0.6127 | -1.08 | 0.1851 | -1.1  | 0.0412 | -1.2  | 0.14   |
| 93256_at   | 1415672_at   | Golga7        | golgi autoantigen, golgin subfamily a, 7     | -1.37 | 0.14 | 1     | 0.9822 | -1.1  | 0.3258 | -1.15 | 0.1297 | 1.09  | 0.5423 |
| 93257_at   | 1415915_at   | Ddx1          | DEAD (Asp-Glu-Ala-Asp) box polypeptide 1     | 2.39  | 0.17 | 1.01  | 0.8933 | 1.11  | 0.1769 | 1.18  | 0.0244 | -1.28 | 0.0831 |
| 93258_at   | 1426475_at   | Hmbs          | hydroxymethylbilane synthase                 | 1.52  | 0.06 | -1.05 | 0.3838 | 1.11  | 0.0831 | -1.09 | 0.1883 | -1.35 | 0.2407 |
| 93264_at   | 1426690_a_at | Sreb1         | sterol regulatory element binding factor 1   | -1.14 | 0.56 | -1.18 | 0.0459 | -1.18 | 0.0406 | -1.42 | 0.0001 | -2.72 | 0.0045 |
| 93266_at   | 1449997_at   | Tpm3          | tropomyosin 3, gamma                         | 1.05  | 0.73 | -1.03 | 0.4285 | -1.05 | 0.5445 | -1.07 | 0.2108 | -1    | 0.98   |
| 93267_at   | 1426671_a_at | Rnpc2         | RNA-binding region (RNP1, RRM) containin     | 1.56  | 0.07 | 1.19  | 0.0487 | 1.11  | 0.4513 | 1.21  | 0.0224 | -1.09 | 0.3542 |
| 93269_at   | 1451240_a_at | Glo1          | glyoxalase 1                                 | -1.21 | 0.21 | 1.48  | 0.0094 | 1.37  | 0.0584 | -1.24 | 0.1703 | -1.84 | 0.0001 |
| 93270_at   | 1423784_at   | Gars          | glycyl-tRNA synthetase                       | 1.68  | 0.24 | -1.04 | 0.5887 | 1.08  | 0.2264 | 1.1   | 0.1983 | -1.18 | 0.2151 |
| 93271_s_at | 1450186_s_at | Gnas          | GNAS (guanine nucleotide binding protein, c  | -1.22 | 0.29 | -1.02 | 0.5227 | 1.04  | 0.5905 | -1.08 | 0.1148 | -1.17 | 0.0448 |
| 93272_at   | 1426160_a_at | Stk16         | serine/threonine kinase 16                   | 1.22  | 0.26 | -1.09 | 0.1899 | 1.06  | 0.2247 | -1.14 | 0.0921 | -1.21 | 0.0825 |
| 93274_at   | 1426124_a_at | Clk1          | CDC-like kinase 1                            | 1.48  | 0.05 | 1.25  | 0.0044 | 1.27  | 0.0693 | 1.4   | 0.0001 | 1.62  | 0.0015 |
| 93275_at   | 1416338_at   | Sh3gl1        | SH3-domain GRB2-like 1                       | -1.13 | 0.84 | -1.02 | 0.8274 | -1.05 | 0.5013 | -1.09 | 0.2151 | -1.02 | 0.9345 |
| 93276_at   | 1448180_a_at | Hn1           | hematological and neurological expressed s   | 1.42  | 0.14 | 1.06  | 0.6813 | -1.09 | 0.5569 | 1.13  | 0.5116 | 1.06  | 0.9042 |
| 93277_at   | 1426351_at   | Hspd1         | heat shock protein 1 (chaperonin)            | -1.08 | 0.27 | -1    | 0.9828 | -1    | 0.989  | -1.04 | 0.5154 | 1.25  | 0.2084 |
| 93278_at   | 1449686_s_at | Scp2          | sterol carrier protein 2, liver              | -1.7  | 0.14 | 1.01  | 0.8209 | -1.09 | 0.388  | -1.11 | 0.3161 | -2.02 | 0.0333 |
| 93281_at   | 1422449_s_at | Rcn2          | reticulocalbin 2                             | 1.18  | 0.54 | 1.22  | 0.2203 | 1.14  | 0.4358 | 1.32  | 0.0899 | 1.24  | 0.0706 |
| 93283_at   | 1451703_s_at | ---           | ---                                          | -1.53 | 0.16 | 1.09  | 0.3359 | 1.16  | 0.372  | 1.17  | 0.0657 | 1.26  | 0.2234 |
| 93284_at   | 1416332_at   | Cirbp         | cold inducible RNA binding protein           | -1.18 | 0.41 | 1.32  | 0.0284 | 1.14  | 0.1323 | 1.5   | 0.0001 | 1.12  | 0.3553 |
| 93285_at   | 1415834_at   | Dusp6         | dual specificity phosphatase 6               | 1.53  | 0.4  | 1.39  | 0.027  | -1.32 | 0.2031 | 1.14  | 0.4374 | 1.62  | 0.0495 |
| 93287_at   | 1449836_x_at | Biklk         | Bcl2-interacting killer-like                 | 2.47  | 0.12 | 2.69  | 0.001  | 1.72  | 0.0596 | 2.77  | 0.0046 | -1.17 | 0.6135 |
| 93288_at   | 1437148_at   | Arpc2         | actin related protein 2/3 complex, subunit 2 | -1.03 | 0.9  | 1.13  | 0.2546 | -1.03 | 0.6324 | 1.05  | 0.601  | -1.2  | 0.3412 |
| 93290_at   | 1453299_a_at | Pnp           | purine-nucleoside phosphorylase              | 1.34  | 0.3  | 1.14  | 0.0314 | -1.04 | 0.3173 | 1.04  | 0.5413 | 1.07  | 0.4534 |
| 93293_at   | 1423807_a_at | Calm2         | calmodulin 2                                 | -1.06 | 0.85 | 1.08  | 0.2178 | 1.17  | 0.0458 | 1.12  | 0.0592 | 1.09  | 0.6033 |
| 93294_at   | 1416953_at   | Ctgf          | connective tissue growth factor              | 1.95  | 0.06 | -1.18 | 0.3019 | 1.54  | 0.0167 | 1.84  | 0.0122 | -1.04 | 0.8998 |
| 93295_at   | 1417258_at   | Cct5          | chaperonin subunit 5 (epsilon)               | 1.83  | 0.16 | -1.11 | 0.0319 | 1.08  | 0.0301 | -1.09 | 0.0791 | -1    | 0.9782 |
| 93296_at   | 1422458_at   | Tcl1          | T-cell lymphoma breakpoint 1                 | -1.78 | 0.34 | -1.06 | 0.8888 | -1    | 0.9901 | -1.02 | 0.9514 | 1.33  | 0.7394 |
| 93298_at   | 1415890_at   | Papss1        | 3'-phosphoadenosine 5'-phosphosulfate syn    | -1.36 | 0.11 | -1.15 | 0.0084 | -1.11 | 0.0536 | -1.13 | 0.0237 | 1.12  | 0.1753 |
| 93300_at   | 1450923_at   | Tgfb2         | transforming growth factor, beta 2           | -3.56 | 0.03 | -1.16 | 0.597  | -1.17 | 0.5774 | -1.04 | 0.8603 | 1.05  | 0.9082 |
| 93301_at   | 1417199_at   | 1300007B12Rik | RIKEN cDNA 1300007B12 gene                   | 1.31  | 0.15 | -1.06 | 0.4949 | -1.16 | 0.1035 | -1.02 | 0.8735 | -1.29 | 0.1731 |
| 93302_at   | 1422448_at   | Tff2          | trefoil factor 2 (spasmolytic protein 1)     | -2.46 | 0.43 | 1.82  | 0.4783 | 57.68 | 0.3647 | 1.09  | 0.7914 | 1     | 0.9931 |
| 93304_at   | 1448741_at   | Slc3a1        | solute carrier family 3, member 1            | 1.51  | 0.28 | -1.43 | 0.0018 | -1.22 | 0.08   | -1.56 | 0.0013 | -1.1  | 0.7264 |
| 93305_f_at | 1420624_a_at | Vamp8         | vesicle-associated membrane protein 8        | 1.11  | 0.48 | 1.01  | 0.8965 | 1.14  | 0.1285 | 1.2   | 0.0185 | 1.17  | 0.4123 |
| 93306_at   | 1450740_a_at | Mapre1        | microtubule-associated protein, RP/EB famil  | -1.12 | 0.6  | -1.04 | 0.6283 | -1.17 | 0.014  | -1.12 | 0.1627 | 1.09  | 0.5814 |
| 93308_s_at | 1416383_a_at | Pcx           | pyruvate carboxylase                         | 1.52  | 0.09 | 1.15  | 0.0721 | 1.09  | 0.3542 | 1.2   | 0.0079 | -1.18 | 0.2523 |
| 93310_at   | 1417771_a_at | Psmc6         | proteasome (prosome, macropain) 26S subu     | 1.36  | 0.08 | 1.16  | 0.066  | 1.06  | 0.4825 | 1.13  | 0.1157 | -1.24 | 0.1775 |
| 93311_at   | 1423849_a_at | Clk3          | CDC-like kinase 3                            | -1.05 | 0.78 | 1.04  | 0.6646 | 1.17  | 0.1193 | -1.02 | 0.8094 | 1.17  | 0.2852 |
| 93312_at   | 1415688_at   | Ube2g1        | ubiquitin-conjugating enzyme E2G 1           | 1.11  | 0.5  | 1.07  | 0.26   | -1.06 | 0.2585 | -1.04 | 0.6509 | -1.07 | 0.6314 |
| 93315_at   | 1451714_a_at | Map2k3        | mitogen activated protein kinase kinase 3    | -1.09 | 0.34 | -1.09 | 0.1493 | -1.17 | 0.0008 | -1.13 | 0.0062 | -1.17 | 0.2026 |
| 93316_at   | 1460192_at   | Osbpl1a       | oxysterol binding protein-like 1A            | -1.07 | 0.78 | -1.04 | 0.5695 | 1.09  | 0.2642 | 1.09  | 0.1475 | -1.36 | 0.0048 |
| 93318_at   | 1448417_at   | Ninj1         | ninjurin 1                                   | 1.82  | 0.31 | -1.14 | 0.1093 | -1.33 | 0.0207 | -1.31 | 0.0065 | -1.56 | 0.1125 |
| 93319_at   | 1415850_at   | Rasa3         | RAS p21 protein activator 3                  | 2.53  | 0.01 | 1.26  | 0.098  | -1.08 | 0.6052 | 1.26  | 0.1473 | 1.32  | 0.0431 |
| 93321_at   | 1448775_at   | Ifi203        | interferon activated gene 203                | 1.28  | 0.34 | -1.05 | 0.8746 | -1.26 | 0.4468 | -1.15 | 0.6325 | 1.44  | 0.3782 |
| 93323_at   | 1453572_a_at | Plp2          | proteolipid protein 2                        | -1.11 | 0.4  | -1.06 | 0.3134 | -1.12 | 0.1188 | -1.05 | 0.4091 | 1.25  | 0.1309 |
| 93324_at   | 1450644_at   | Zfp361        | zinc finger protein 36, C3H type-like 1      | 1.14  | 0.44 | 1.1   | 0.2795 | -1.2  | 0.0636 | 1.03  | 0.7496 | 1.07  | 0.6887 |
| 93326_at   | 1448737_at   | Tspan7        | tetraspanin 7                                | 1.09  | 0.68 | -1.21 | 0.0238 | 1.05  | 0.5298 | -1.09 | 0.4149 | 1.32  | 0.1072 |
| 93327_at   | 1424169_at   | Tax1bp3       | Tax1 (human T-cell leukemia virus type I) bi | 1.41  | 0.3  | 1.11  | 0.1546 | 1.06  | 0.4643 | 1.17  | 0.0253 | -1.14 | 0.6188 |
| 93328_at   | 1454713_s_at | Hdc           | histidine decarboxylase                      | 3.58  | 0    | 1.01  | 0.982  | -1.15 | 0.6281 | -1.39 | 0.3091 | -1.22 | 0.4949 |
| 93330_at   | 1416203_at   | Aqp1          | aquaporin 1                                  | 1.26  | 0.6  | -1.15 | 0.3153 | 1.12  | 0.5199 | -1.35 | 0.21   | 1.05  | 0.7371 |
| 93332_at   | 1450884_at   | Cd36          | CD36 antigen                                 | 2.72  | 0.01 | 1.51  | 0.0025 | 1.16  | 0.2974 | 1.28  | 0.0495 | 1.15  | 0.6274 |
| 93333_at   | 1417652_a_at | Tbca          | tubulin cofactor a                           | 1.28  | 0.45 | 1.09  | 0.1401 | 1.13  | 0.2816 | 1.05  | 0.4382 | -1.14 | 0.4001 |
| 93336_at   | 1424708_at   | 1110014C03Rik | RIKEN cDNA 1110014C03 gene                   | 1.1   | 0.71 | -1.08 | 0.0275 | 1.11  | 0.063  | 1.06  | 0.343  | -1.18 | 0.1811 |
| 93337_at   | 1417007_a_at | Vps4b         | vacuolar protein sorting 4b (yeast)          | 1.47  | 0.05 | 1.11  | 0.0746 | 1.18  | 0.1691 | 1.07  | 0.2543 | -1.15 | 0.2301 |

|            |              |               |                                                  |       |      |       |        |       |        |       |        |       |        |
|------------|--------------|---------------|--------------------------------------------------|-------|------|-------|--------|-------|--------|-------|--------|-------|--------|
| 93338_at   | 1419558_at   | Mdm4          | transformed mouse 3T3 cell double minute 4       | -1.66 | 0.28 | 1.07  | 0.8169 | 1.19  | 0.6701 | 1.93  | 0.104  | 2.11  | 0.198  |
| 93339_at   | 1460542_s_at | Mdm4          | transformed mouse 3T3 cell double minute 4       | 1.51  | 0.19 | 1.34  | 0.0003 | 1.27  | 0.015  | 1.49  | 0.0001 | 1.57  | 0.0041 |
| 93341_r_at | 1456175_a_at | Copb2         | coatamer protein complex, subunit beta 2 (b      | -1.38 | 0.03 | -1.21 | 0.1085 | -1.16 | 0.1348 | -1.2  | 0.0105 | -1.13 | 0.3915 |
| 93346_at   | 1417864_at   | ---           | ---                                              | 1.63  | 0.2  | 1.15  | 0.0995 | 1.23  | 0.0842 | 1.37  | 0.0051 | -1.28 | 0.0636 |
| 93347_at   | 1421873_s_at | Rab24         | RAB24, member RAS oncogene family                | 1.82  | 0.11 | -1.05 | 0.5283 | 1.01  | 0.9515 | 1.16  | 0.0546 | -1.09 | 0.5795 |
| 93348_at   | 1448517_at   | Timm22        | translocase of inner mitochondrial membran       | 2.42  | 0.02 | 1.09  | 0.3496 | -1.06 | 0.4478 | -1.08 | 0.1706 | -1.35 | 0.2285 |
| 93349_at   | 1448433_a_at | Pcolce        | procollagen C-proteinase enhancer protein        | -1.01 | 0.95 | 1.13  | 0.0793 | -1.01 | 0.8614 | -1.04 | 0.6567 | 1.08  | 0.5803 |
| 93350_f_at | 1451244_a_at | Zfp422        | zinc finger protein 422                          | 1.94  | 0.08 | 1.48  | 0.0061 | -1.1  | 0.6672 | 1.18  | 0.2167 | 1.02  | 0.9505 |
| 93351_at   | 1419905_s_at | ---           | ---                                              | 1.06  | 0.73 | -1    | 0.9888 | 1.03  | 0.7743 | -1.01 | 0.8962 | 1.06  | 0.7081 |
| 93352_at   | 1455900_x_at | Tgm2          | transglutaminase 2, C polypeptide                | -1.22 | 0.03 | 1.07  | 0.3063 | -1.11 | 0.1197 | 1.04  | 0.3572 | -1.17 | 0.477  |
| 93353_at   | 1423607_at   | Lum           | lumican                                          | -1.23 | 0.47 | -1.4  | 0.0024 | -1.01 | 0.9093 | -1.46 | 0.0006 | 1.07  | 0.7602 |
| 93354_at   | 1417561_at   | Apoc1         | apolipoprotein C-I                               | -1.1  | 0.82 | 1.07  | 0.0015 | 1.04  | 0.0784 | 1.07  | 0.0027 | 1.41  | 0.0024 |
| 93356_at   | 1416031_s_at | Mcmf          | minichromosome maintenance deficient 7 (S        | 1.11  | 0.7  | 1.09  | 0.3768 | -1    | 0.9948 | 1.24  | 0.1072 | -1.21 | 0.5503 |
| 93358_at   | 1419736_a_at | Eif1ay        | eukaryotic translation initiation factor 1A, Y-I | 2.1   | 0.04 | 1.36  | 0.0003 | 1.33  | 0.0486 | 1.41  | 0      | 1.07  | 0.5693 |
| 93360_at   | 1424167_a_at | Pmm1          | phosphomannomutase 1                             | -1.12 | 0.24 | 1.14  | 0.5725 | -1.07 | 0.549  | 1.07  | 0.511  | -1.26 | 0.2662 |
| 93362_at   | 1450894_a_at | Ap2m1         | adaptor protein complex AP-2, mu1                | 1.1   | 0.59 | 1     | 0.9523 | 1.03  | 0.7575 | 1.02  | 0.733  | -1    | 0.9889 |
| 93364_at   | 1448149_at   | Catna1        | catenin alpha 1                                  | 1.15  | 0.47 | 1.03  | 0.7308 | 1.18  | 0.1346 | 1.03  | 0.7082 | -1.45 | 0.0368 |
| 93366_r_at | 1426425_at   | Sugt1         | SGT1, suppressor of G2 allele of SKP1 (S. c      | 1.82  | 0.06 | 1.18  | 0.0242 | 1.11  | 0.451  | 1.26  | 0.0032 | 1.27  | 0.0381 |
| 93367_at   | 1418196_at   | Tep1          | telomerase associated protein 1                  | 1.23  | 0.6  | -1.01 | 0.9866 | -1.04 | 0.9191 | 1.11  | 0.7456 | 1.03  | 0.8641 |
| 93369_at   | 1418745_at   | Omd           | osteomodulin                                     | -1.32 | 0.55 | -1.17 | 0.6185 | -1.31 | 0.4234 | 2.06  | 0.0126 | -2.02 | 0.1907 |
| 93371_at   | 1424890_at   | Bnc1          | basonuclin 1                                     | 2.36  | 0.11 | -1.29 | 0.1008 | -1.11 | 0.4164 | -1.19 | 0.1288 | 1.02  | 0.9629 |
| 93372_at   | 1450407_a_at | Anp32a        | acidic (leucine-rich) nuclear phosphoprotein     | -1.1  | 0.93 | -1.18 | 0.6708 | -3.43 | 0.0021 | -4.19 | 0.0009 | 1.39  | 0.0679 |
| 93373_at   | 1417706_at   | Naglu         | alpha-N-acetylglucosaminidase (Sanfilippo c      | 1.07  | 0.56 | 1.02  | 0.5952 | -1.05 | 0.1909 | 1.01  | 0.7215 | 1.02  | 0.8475 |
| 93374_at   | 1418161_at   | Jph3          | junctophilin 3                                   | -1.86 | 0.14 | -1.21 | 0.3775 | 1.23  | 0.4651 | -1.14 | 0.6035 | 1.18  | 0.7579 |
| 93375_at   | 1455893_at   | 2610028F08Rik | RIKEN cDNA 2610028F08 gene                       | 4.07  | 0    | -1.16 | 0.5663 | -1.36 | 0.2946 | 1.03  | 0.8964 | 1.46  | 0.2184 |
| 93376_at   | 1437419_at   | Bmp2k         | BMP2 inducible kinase                            | 8.79  | 0    | 1.25  | 0.3399 | -1.14 | 0.6591 | 1.09  | 0.6758 | 1.26  | 0.6192 |
| 93379_at   | 1418298_s_at | Dpysl4        | dihydropyrimidinase-like 4                       | -1.01 | 0.96 | 1.17  | 0.1857 | 1.21  | 0.1596 | 1.06  | 0.7677 | 1.44  | 0.1671 |
| 93380_at   | 1449570_at   | Klrb1c        | killer cell lectin-like receptor subfamily B me  | -1.04 | 0.93 | 1.06  | 0.8255 | 1.4   | 0.3049 | 1.36  | 0.2607 | -1.46 | 0.4081 |
| 93381_at   | 1450794_at   | Avp           | arginine vasopressin                             | -1.35 | 0.23 | 1.14  | 0.2384 | 1.14  | 0.1482 | 1.09  | 0.1374 | 1.48  | 0.0654 |
| 93382_at   | 1449420_at   | Pde1b         | phosphodiesterase 1B, Ca2+-calmodulin de         | -1.15 | 0.34 | -1.04 | 0.7295 | -1.24 | 0.1755 | 1.06  | 0.5304 | 1.68  | 0.1978 |
| 93383_at   | 1419613_at   | Col7a1        | procollagen, type VII, alpha 1                   | -1.3  | 0.27 | -1.5  | 0.0836 | 1.05  | 0.8645 | -1.36 | 0.1092 | 2.18  | 0.141  |
| 93384_at   | 1421455_at   | Sntb1         | syntrophin, basic 1                              | 1.18  | 0.59 | 1.26  | 0.1326 | -1.04 | 0.8298 | 1.05  | 0.7487 | -1.71 | 0.3207 |
| 93385_at   | 1419433_at   | Nthl1         | nth (endonuclease III)-like 1 (E.coli)           | 3.13  | 0.02 | 1.36  | 0.1152 | -1.83 | 0.0239 | 1.11  | 0.5049 | 1.51  | 0.4887 |
| 93386_at   | 1418958_at   | Amac1         | acyl-malonyl condensing enzyme 1                 | -1.38 | 0.55 | 1.14  | 0.5929 | -1.15 | 0.6223 | -1.02 | 0.9359 | 1.15  | 0.7681 |
| 93387_at   | 1418063_at   | Kera          | keratocan                                        | -1.71 | 0.37 | 1.07  | 0.7467 | 1.04  | 0.8564 | 1.2   | 0.4183 | 2.05  | 0.2739 |
| 93390_g_at | 1419700_a_at | Prom1         | prominin 1                                       | 1.19  | 0.73 | -3.13 | 0      | -2.33 | 0.0001 | -4.06 | 0      | 2.1   | 0.1353 |
| 93391_at   | 1420453_at   | Crygs         | crystallin, gamma S                              | -2.09 | 0.03 | -1.31 | 0.0563 | -1.05 | 0.7257 | -1.31 | 0.0382 | 1.09  | 0.3917 |
| 93392_at   | 1420657_at   | ---           | ---                                              | -1.11 | 0.69 | -1.17 | 0.3439 | -1.03 | 0.8667 | -1.22 | 0.1679 | 1.01  | 0.9164 |
| 93393_at   | 1449524_at   | Eda           | ectodysplasin-A                                  | -2.44 | 0.06 | 1.27  | 0.0456 | 1.07  | 0.6245 | 1.24  | 0.043  | 1.02  | 0.9075 |
| 93395_g_at | 1419596_at   | Eda           | ectodysplasin-A                                  | -1.88 | 0.07 | -1.2  | 0.2636 | -1.19 | 0.3838 | -1.19 | 0.2193 | 1.18  | 0.7755 |
| 93396_at   | 1437758_a_at | Slc4a1ap      | solute carrier family 4 (anion exchanger), me    | 1.71  | 0.03 | 1.21  | 0.0344 | 1.17  | 0.0296 | 1.26  | 0.0001 | 1.13  | 0.5388 |
| 93397_at   | 1421188_at   | Ccr2          | chemokine (C-C motif) receptor 2                 | 2.67  | 0.01 | 4.47  | 0.2018 | -1.07 | 0.7832 | 5.85  | 0.0902 | 1.32  | 0.4799 |
| 93398_at   | 1421128_at   | U2af1-rs2     | U2 small nuclear ribonucleoprotein auxiliary     | -1.41 | 0.32 | 1.62  | 0.1464 | -1.19 | 0.4187 | -1.48 | 0.1794 | -1.19 | 0.5914 |
| 93399_at   | 1452358_at   | Rai2          | retinoic acid induced 2                          | -1.3  | 0.53 | -1.22 | 0.3232 | -1.01 | 0.9749 | -1.14 | 0.7018 | 1.33  | 0.2775 |
| 93400_at   | 1421394_a_at | ---           | ---                                              | 1.2   | 0.58 | -1.12 | 0.1475 | -1.01 | 0.9167 | 1.04  | 0.6963 | 1.21  | 0.3895 |
| 93401_g_at | 1450231_a_at | Birc4         | baculoviral IAP repeat-containing 4              | -8.67 | 0.24 | -1.73 | 0.093  | -1.36 | 0.3274 | -1.02 | 0.9434 | -1.4  | 0.374  |
| 93402_i_at | 1426636_a_at | Birc4         | baculoviral IAP repeat-containing 4              | 3.89  | 0.23 | -1.03 | 0.7537 | -1.09 | 0.3595 | -1.22 | 0.0778 | -3.02 | 0.0536 |
| 93404_g_at | 1450124_a_at | Atp2a3        | ATPase, Ca++ transporting, ubiquitous            | -1.52 | 0.03 | 1.3   | 0.2118 | 1.13  | 0.1068 | 1.1   | 0.2587 | 2.46  | 0.0123 |
| 93405_at   | 1427462_at   | E2f3          | E2F transcription factor 3                       | 2.14  | 0.23 | -1.46 | 0.1273 | -1.25 | 0.3117 | -1.12 | 0.4984 | 1.56  | 0.4497 |
| 93407_at   | 1421212_at   | Abcc6         | ATP-binding cassette, sub-family C (CFTR/M       | 1.51  | 0.24 | 1.05  | 0.4737 | 1.16  | 0.1131 | 1.02  | 0.8333 | -1.14 | 0.2162 |
| 93408_at   | 1436348_at   | ---           | Transcribed locus                                | 1.26  | 0.05 | -1.13 | 0.1511 | 1.02  | 0.7834 | -1.1  | 0.197  | -1.02 | 0.9356 |
| 93409_at   | 1449593_at   | ---           | Transcribed locus                                | -2.02 | 0.26 | 1.14  | 0.4285 | 1.1   | 0.5331 | 1.03  | 0.7984 | 1.65  | 0.0459 |
| 93410_at   | 1455424_at   | 1810073P09Rik | RIKEN cDNA 1810073P09 gene                       | -1.73 | 0.04 | -1.02 | 0.8208 | 1.08  | 0.4268 | -1.06 | 0.5136 | 1.28  | 0.1588 |



|            |              |               |                                                |       |      |       |        |       |        |       |        |       |        |
|------------|--------------|---------------|------------------------------------------------|-------|------|-------|--------|-------|--------|-------|--------|-------|--------|
| 93411_at   | 1459903_at   | Sema7a        | sema domain, immunoglobulin domain (Ig),       | -1.5  | 0.3  | -1.12 | 0.7402 | -1.04 | 0.9174 | -1.17 | 0.5914 | 1.7   | 0.2963 |
| 93412_at   | 1432273_a_at | Dfy           | Duffy blood group                              | -1.71 | 0.23 | 1.2   | 0.7181 | -1.42 | 0.1587 | -1    | 0.9913 | 1.17  | 0.7071 |
| 93413_at   | 1421147_at   | Terf2         | telomeric repeat binding factor 2              | -1.05 | 0.89 | -1.04 | 0.7547 | -1.15 | 0.3442 | 1.01  | 0.9645 | -1.02 | 0.9289 |
| 93414_at   | 1418872_at   | Abcb1b        | ATP-binding cassette, sub-family B (MDR/T,     | -1.15 | 0.82 | 1.15  | 0.5271 | 1.24  | 0.4086 | 1.26  | 0.2186 | 1.13  | 0.3864 |
| 93416_at   | 1419083_at   | Tnfsf11       | tumor necrosis factor (ligand) superfamily, r  | -1.32 | 0.63 | 1.1   | 0.5943 | 1.09  | 0.6524 | -1.34 | 0.1244 | 1.6   | 0.2265 |
| 93418_g_at | 1421541_a_at | Mef2b         | myocyte enhancer factor 2B                     | 1.05  | 0.85 | -1.04 | 0.6366 | -1.11 | 0.1366 | -1.09 | 0.2174 | -1.1  | 0.5366 |
| 93419_at   | 1425066_a_at | 1110061O04Rik | RIKEN cDNA 1110061O04 gene                     | 1.21  | 0.14 | 1.03  | 0.6453 | 1.04  | 0.5142 | 1.01  | 0.8472 | 1.01  | 0.9426 |
| 93421_at   | 1419249_at   | Pftk1         | PFTAIRE protein kinase 1                       | 1.84  | 0.2  | -1.32 | 0.266  | -1.03 | 0.9293 | -1.25 | 0.436  | 1.15  | 0.7736 |
| 93423_at   | 1423673_at   | BC058638      | cDNA sequence BC058638                         | -1.94 | 0.04 | 1.18  | 0.5075 | 1.26  | 0.3848 | 1.17  | 0.5135 | 1.21  | 0.4278 |
| 93424_at   | 1434937_at   | Phr1          | pam, highwire, rpm 1                           | 1.39  | 0.27 | 1.19  | 0.148  | 1.06  | 0.5033 | 1.21  | 0.0326 | -1.05 | 0.4777 |
| 93425_at   | 1460231_at   | Irf5          | interferon regulatory factor 5                 | -1.32 | 0.17 | -1.14 | 0.4278 | -1.41 | 0.0004 | 1.06  | 0.777  | -1.27 | 0.1012 |
| 93426_at   | 1428982_at   | ---           | ---                                            | -1.37 | 0.03 | -1.18 | 0.1428 | 1.19  | 0.2626 | -1.17 | 0.2558 | -1.17 | 0.3569 |
| 93427_at   | 1435463_s_at | Myo1d         | myosin ID                                      | 1.18  | 0.44 | 1.1   | 0.2443 | -1.05 | 0.4488 | -1.12 | 0.2061 | -1.02 | 0.8752 |
| 93429_at   | 1449016_at   | Zp2           | zona pellucida glycoprotein 2                  | -2.06 | 0.46 | 1.99  | 0.0255 | 2.54  | 0.0526 | 1.7   | 0.1251 | -1.17 | 0.6715 |
| 93430_at   | 1417625_s_at | Cmkor1        | chemokine orphan receptor 1                    | 2.76  | 0.01 | -1.74 | 0.1237 | -1.64 | 0.1817 | -1.42 | 0.3131 | -1.18 | 0.5112 |
| 93431_at   | 1434944_at   | Dm15          | dystrophia myotonica kinase, B15               | -1.05 | 0.79 | 1.29  | 0.0135 | -1.04 | 0.682  | 1.42  | 0.0027 | 1.74  | 0.0172 |
| 93433_s_at | 1421944_a_at | Asgr1         | asialoglycoprotein receptor 1                  | 1.06  | 0.51 | -1.2  | 0.0014 | -1.06 | 0.1567 | -1.26 | 0.0006 | -1.6  | 0.012  |
| 93434_at   | 1449816_at   | Sult5a1       | sulfotransferase family 5A, member 1           | -2.2  | 0.09 | -5.66 | 0      | -2.82 | 0.0006 | -5.32 | 0      | 1.2   | 0.2967 |
| 93435_at   | 1418866_at   | Cyp24a1       | cytochrome P450, family 24, subfamily a, pc    | -2.96 | 0.2  | 1     | 0.9977 | 1.21  | 0.5692 | 1.31  | 0.4359 | -1.19 | 0.6901 |
| 93437_f_at | 1433954_at   | 4632419I22Rik | RIKEN cDNA 4632419I22 gene                     | 1.22  | 0.49 | 1.3   | 0.0008 | 1.08  | 0.5256 | 1.29  | 0.0028 | -1.21 | 0.4362 |
| 93440_at   | 1415766_at   | 4930564D15Rik | RIKEN cDNA 4930564D15 gene                     | -1.05 | 0.69 | -1.05 | 0.3091 | 1.02  | 0.8912 | 1.02  | 0.6477 | -1.46 | 0.0234 |
| 93441_at   | 1427141_at   | 2700099C18Rik | RIKEN cDNA 2700099C18 gene                     | 4.11  | 0.27 | 1.94  | 0.1974 | 1.21  | 0.7135 | 2.2   | 0.1303 | -1.08 | 0.8194 |
| 93442_at   | 1450151_at   | Zfp316        | zinc finger protein 316                        | -1.2  | 0.38 | 1.1   | 0.2547 | 1.19  | 0.046  | 1.12  | 0.0875 | 1.44  | 0.0926 |
| 93443_at   | 1453321_at   | Fndc1         | fibronectin type III domain containing 1       | 1.07  | 0.88 | -1.19 | 0.2363 | -1.08 | 0.5399 | -1.07 | 0.5403 | 1.15  | 0.5438 |
| 93444_at   | 1419410_at   | Batf          | basic leucine zipper transcription factor, ATF | -2.12 | 0.1  | -1.21 | 0.0985 | -1.26 | 0.0173 | -1.21 | 0.1301 | 1.6   | 0.0291 |
| 93445_at   | 1449193_at   | Cd5l          | CD5 antigen-like                               | 1.57  | 0.13 | 1.15  | 0.5967 | -1.23 | 0.0109 | 1.12  | 0.7345 | -1.22 | 0.2514 |
| 93446_at   | 1422954_at   | Zfp60         | zinc finger protein 60                         | -3.34 | 0.01 | 1.04  | 0.859  | 1.04  | 0.8683 | -1.22 | 0.5409 | -1.01 | 0.9892 |
| 93448_at   | 1451970_at   | E330036I19Rik | RIKEN cDNA E330036I19 gene                     | 1.23  | 0.16 | 1.06  | 0.7312 | 1.65  | 0.0643 | 1.43  | 0.0256 | -3.54 | 0.0007 |
| 93449_at   | 1416650_at   | RfpI4         | ret finger protein-like 4                      | -1.37 | 0.11 | -1.72 | 0.0758 | -1.05 | 0.8012 | -1.01 | 0.9535 | 1.34  | 0.3732 |
| 93450_at   | 1439040_at   | Cenpe         | centromere protein E                           | 1.15  | 0.49 | -1.38 | 0.4443 | -1.16 | 0.7409 | 1.19  | 0.6896 | 1.29  | 0.6224 |
| 93451_at   | 1455056_at   | Lmo7          | LIM domain only 7                              | 1.36  | 0.41 | 1.5   | 0.0001 | 1.36  | 0.0067 | 1.64  | 0      | 1.84  | 0.0725 |
| 93452_at   | 1450256_at   | Cer1          | cerberus 1 homolog (Xenopus laevis)            | -1.02 | 0.94 | -1.38 | 0.1502 | 1.11  | 0.5149 | -1.19 | 0.3861 | 1.16  | 0.2423 |
| 93453_at   | 1448996_at   | Rom1          | rod outer segment membrane protein 1           | -1.4  | 0.25 | 1.21  | 0.0595 | -1.13 | 0.6149 | -1.08 | 0.663  | 1.64  | 0.1705 |
| 93454_at   | 1419589_at   | C1qr1         | complement component 1, q subcomponent         | 1.32  | 0.28 | 1.26  | 0.4142 | 1.07  | 0.5584 | 1.5   | 0.318  | 1.6   | 0.2258 |
| 93455_s_at | 1422912_at   | Bmp4          | bone morphogenetic protein 4                   | -1.36 | 0.03 | -1.06 | 0.3083 | -1.04 | 0.4814 | -1.03 | 0.5885 | 1.49  | 0.0086 |
| 93457_at   | 1427264_at   | Crygb         | crystallin, gamma B                            | -4.49 | 0.32 | -1.52 | 0.2292 | 1.79  | 0.0852 | 1.36  | 0.5049 | 2.4   | 0.1193 |
| 93458_at   | 1419959_s_at | C330003B14Rik | RIKEN cDNA C330003B14 gene                     | 1.02  | 0.94 | -1.61 | 0.0009 | 1.06  | 0.7644 | -1.75 | 0.0154 | 1.05  | 0.8757 |
| 93461_at   | 1425298_a_at | Birc1a        | baculoviral IAP repeat-containing 1a           | -1.71 | 0.48 | -1.02 | 0.9614 | -1.02 | 0.9445 | 1.19  | 0.5612 | -1.2  | 0.8153 |
| 93462_at   | 1440192_at   | 1810054D07Rik | RIKEN cDNA 1810054D07 gene                     | 1.1   | 0.89 | 1.12  | 0.7671 | -1.07 | 0.8587 | -2.02 | 0.1624 | 2.15  | 0.2486 |
| 93464_at   | 1455151_at   | Akap9         | A kinase (PRKA) anchor protein (yotiao) 9      | 1.45  | 0.55 | -1.23 | 0.4768 | -1.75 | 0.1087 | -1.95 | 0.036  | -1.38 | 0.2439 |
| 93465_at   | 1453076_at   | 9130211I03Rik | RIKEN cDNA 9130211I03 gene                     | -1.05 | 0.86 | -1.02 | 0.7758 | -1.07 | 0.1794 | 1.02  | 0.7815 | 1.07  | 0.5513 |
| 93467_at   | 1436030_at   | B430218L07Rik | RIKEN cDNA B430218L07 gene                     | -1.31 | 0.26 | -1.05 | 0.6239 | 1.11  | 0.3905 | -1.08 | 0.4725 | 2.06  | 0.0208 |
| 93468_at   | 1425640_at   | Mllt2h        | homolog of human MLLT2 unidentified gene       | -1.05 | 0.89 | 1.07  | 0.7119 | -1.08 | 0.5965 | -1.25 | 0.2236 | 1.25  | 0.2324 |
| 93469_at   | 1451550_at   | Ephb3         | Eph receptor B3                                | 1.26  | 0.64 | -1.44 | 0.2292 | -1.48 | 0.1997 | -1.4  | 0.249  | -1.15 | 0.7949 |
| 93470_at   | 1419749_at   | Dnmt2         | DNA methyltransferase 2                        | 1.58  | 0.07 | 1.12  | 0.3932 | -1.22 | 0.3431 | 1.23  | 0.1685 | -1.69 | 0.1663 |
| 93471_at   | 1438673_at   | Slc4a7        | solute carrier family 4, sodium bicarbonate c  | -1.26 | 0.56 | 1.32  | 0.0278 | 1.76  | 0.0251 | 1.53  | 0.0073 | 1.08  | 0.6434 |
| 93472_at   | 1434479_at   | AlI413331     | expressed sequence AlI413331                   | -1.28 | 0.15 | -1.09 | 0.1414 | -1.09 | 0.1885 | -1.09 | 0.1266 | 1.22  | 0.0321 |
| 93475_at   | 1424817_at   | 4931426K16Rik | RIKEN cDNA 4931426K16 gene                     | 1.3   | 0.16 | -1.27 | 0.0122 | -1.03 | 0.7637 | -1.13 | 0.158  | 1.06  | 0.7502 |
| 93476_at   | 1451576_at   | Prkdc         | protein kinase, DNA activated, catalytic poly  | 2.63  | 0.22 | -1.12 | 0.4728 | -1.06 | 0.7916 | -1.33 | 0.097  | -2.36 | 0.0299 |
| 93479_at   | 1455531_at   | A930031D07Rik | RIKEN cDNA A930031D07 gene                     | -3.13 | 0.15 | -1.01 | 0.9601 | -1.23 | 0.2086 | -1.32 | 0.1516 | -1.02 | 0.9583 |
| 93480_at   | 1427029_at   | Htra3         | serine protease HTRA3                          | -1.9  | 0.26 | -1.02 | 0.922  | -1.01 | 0.9595 | 1.01  | 0.9773 | -1.65 | 0.295  |
| 93481_at   | 1428835_at   | Myh14         | myosin, heavy polypeptide 14                   | 1.17  | 0.69 | -1.22 | 0.0674 | -1.31 | 0.0707 | -1.09 | 0.3378 | 1.19  | 0.436  |
| 93482_at   | 1425506_at   | Mylk          | myosin, light polypeptide kinase               | -1.03 | 0.72 | -1.1  | 0.0259 | 1     | 0.9432 | -1.05 | 0.2397 | 1.07  | 0.4013 |

|            |              |               |                                                 |       |      |        |        |        |        |        |        |       |        |
|------------|--------------|---------------|-------------------------------------------------|-------|------|--------|--------|--------|--------|--------|--------|-------|--------|
| 93483_at   | 1449455_at   | Hck           | hemopoietic cell kinase                         | 1.57  | 0.15 | 1.33   | 0.3342 | -1.1   | 0.2317 | 1.45   | 0.2895 | -1.11 | 0.7858 |
| 93484_at   | 1428737_s_at | 9130427A09Rik | RIKEN cDNA 9130427A09 gene                      | 1.08  | 0.68 | -1.05  | 0.4947 | -1.02  | 0.8502 | -1.2   | 0.1097 | -1.54 | 0.0184 |
| 93485_at   | 1435537_at   | Ptpnd         | Protein tyrosine phosphatase, receptor type,    | -1.35 | 0.38 | 1.02   | 0.8715 | -1.03  | 0.7651 | 1.15   | 0.172  | -1.24 | 0.1775 |
| 93486_at   | 1422811_at   | Slc27a1       | solute carrier family 27 (fatty acid transporte | -1.13 | 0.5  | -1.05  | 0.7321 | 1.08   | 0.5774 | -1.02  | 0.8396 | 1.02  | 0.9221 |
| 93488_at   | 1433502_s_at | AW550801      | expressed sequence AW550801                     | 1.03  | 0.92 | 1      | 0.9889 | 1.13   | 0.2162 | 1.02   | 0.8167 | 1.44  | 0.0082 |
| 93490_at   | 1451126_at   | 1110068E11Rik | RIKEN cDNA 1110068E11 gene                      | 1.12  | 0.13 | 1.18   | 0.1025 | 1.09   | 0.1727 | 1.12   | 0.0826 | 1.17  | 0.177  |
| 93491_f_at | 1450858_a_at | Ube2d3        | ubiquitin-conjugating enzyme E2D 3 (UBC4/       | 1.45  | 0.12 | 1.28   | 0.1075 | 1.26   | 0.1604 | 1.41   | 0.0087 | -1.51 | 0.054  |
| 93492_at   | 1450103_a_at | Pscd2         | pleckstrin homology, Sec7 and coiled-coil dc    | 1.03  | 0.85 | -1.02  | 0.8424 | 1.06   | 0.5165 | 1.04   | 0.6734 | 1.61  | 0.0001 |
| 93493_at   | 1423645_a_at | ---           | ---                                             | 1.5   | 0.15 | -1.18  | 0.0113 | -1.17  | 0.0042 | -1.26  | 0.0011 | 1.01  | 0.9598 |
| 93495_at   | 1435731_x_at | Stag1         | Stromal antigen 1                               | -1.3  | 0.14 | -1.33  | 0.0004 | 1.01   | 0.9008 | -1.52  | 0      | -1.32 | 0.112  |
| 93496_at   | 1415840_at   | Elov15        | ELOVL family member 5, elongation of long       | -1.74 | 0.05 | -1.53  | 0      | -1.18  | 0.1317 | -1.99  | 0      | -3.85 | 0      |
| 93497_at   | 1423954_at   | C3            | complement component 3                          | -1.43 | 0.23 | 1.08   | 0.4321 | 1.09   | 0.226  | 1.06   | 0.4819 | -1.16 | 0.0656 |
| 93498_s_at | 1421888_x_at | Aplp2         | amyloid beta (A4) precursor-like protein 2      | -1.42 | 0.2  | 1.02   | 0.7793 | -1.09  | 0.266  | -1.05  | 0.4335 | -1.31 | 0.3109 |
| 93499_at   | 1452038_at   | Capza1        | capping protein (actin filament) muscle Z-lin   | 1.05  | 0.68 | -1.08  | 0.4016 | -1.03  | 0.8042 | -1.14  | 0.1244 | -1.19 | 0.2773 |
| 93500_at   | 1424126_at   | Alas1         | aminolevulinic acid synthase 1                  | 1.21  | 0.75 | -1.22  | 0.1575 | 1.16   | 0.1839 | 1.03   | 0.8112 | 1.68  | 0.1282 |
| 93503_at   | 1448201_at   | Sfrp2         | secreted frizzled-related sequence protein 2    | -1.65 | 0.01 | -1.06  | 0.7201 | 1.05   | 0.7308 | -1.3   | 0.0871 | 1.33  | 0.171  |
| 93505_at   | 1451048_at   | ---           | ---                                             | -1.16 | 0.52 | -1.07  | 0.8382 | 1.04   | 0.9243 | -1.05  | 0.8739 | 1.77  | 0.2175 |
| 93507_at   | 1420924_at   | Timp2         | tissue inhibitor of metalloproteinase 2         | 1.06  | 0.92 | -1.14  | 0.1387 | -1.25  | 0.1379 | -1.22  | 0.0241 | 1.27  | 0.5438 |
| 93509_at   | 1423106_at   | Ube2b         | ubiquitin-conjugating enzyme E2B, RAD6 hc       | 1.11  | 0.22 | -1.1   | 0.0451 | -1.14  | 0.0824 | -1.21  | 0.0228 | -1.04 | 0.8137 |
| 93511_at   | 1423608_at   | Itn2a         | integral membrane protein 2A                    | 1.47  | 0.2  | 1.59   | 0.028  | 1.36   | 0.076  | 1.54   | 0.0256 | 2.58  | 0.1244 |
| 93512_f_at | 1438292_x_at | Adk           | adenosine kinase                                | -1.09 | 0.69 | 1.12   | 0.0907 | -1.13  | 0.0566 | -1     | 0.9695 | -1.24 | 0.0718 |
| 93514_at   | 1428266_at   | Myl3          | myosin, light polypeptide 3                     | -3.9  | 0.24 | -17.55 | 0.2947 | -19.02 | 0.2925 | -19.14 | 0.2924 | 1.2   | 0.5427 |
| 93515_at   | 1448906_at   | Cdh16         | cadherin 16                                     | -4.35 | 0.13 | -1.45  | 0.2194 | -1.42  | 0.237  | -1.52  | 0.1711 | 1.83  | 0.2359 |
| 93517_at   | 1452250_a_at | Col6a2        | procollagen, type VI, alpha 2                   | -1.02 | 0.92 | -1.01  | 0.9311 | -1.07  | 0.3616 | 1      | 0.981  | 1.11  | 0.5538 |
| 93518_at   | 1448324_at   | Rnps1         | ribonucleic acid binding protein S1             | 2.69  | 0.09 | 1.42   | 0.1632 | 1.66   | 0.0873 | 1.97   | 0.0184 | 1.04  | 0.8021 |
| 93519_s_at | 1423715_a_at | Neddd8        | neural precursor cell expressed, developme      | 1.6   | 0.01 | 1.12   | 0.0012 | 1.2    | 0.0041 | 1.14   | 0.0524 | -1.02 | 0.9043 |
| 93520_at   | 1450045_at   | Srrm1         | serine/arginine repetitive matrix 1             | -1.37 | 0.33 | -1.02  | 0.8032 | -1.05  | 0.7252 | -1.38  | 0.0784 | 1.45  | 0.2252 |
| 93521_at   | 1454689_at   | Srrm1         | serine/arginine repetitive matrix 1             | 1.01  | 0.98 | 1.09   | 0.0764 | 1.05   | 0.2255 | 1.07   | 0.1832 | 1.2   | 0.137  |
| 93523_at   | 1456170_x_at | Calr          | calreticulin                                    | -1.85 | 0.47 | 1.1    | 0.7835 | -1.14  | 0.7202 | 1.07   | 0.8248 | 1.5   | 0.8259 |
| 93528_s_at | 1428289_at   | Bteb1         | basic transcription element binding protein 1   | -1.18 | 0.51 | -1.07  | 0.5872 | -1.29  | 0.1305 | -1.35  | 0.0751 | -1.51 | 0.0088 |
| 93529_at   | 1419041_at   | D8Wsu49e      | DNA segment, Chr 8, Wayne State Universi        | 1.34  | 0.27 | -1.17  | 0.1139 | -1.24  | 0.0475 | -1.26  | 0.0383 | -2.23 | 0.01   |
| 93530_at   | 1435637_at   | D8Wsu49e      | DNA segment, Chr 8, Wayne State Universi        | 1.14  | 0.16 | -1.03  | 0.6525 | -1.02  | 0.8727 | -1.01  | 0.8615 | -1.77 | 0.0076 |
| 93531_at   | 1423692_at   | Ndufa8        | NADH dehydrogenase (ubiquinone) 1 alpha         | 1.5   | 0.21 | -1.08  | 0.151  | 1.11   | 0.1049 | -1.02  | 0.7547 | -1.5  | 0.026  |
| 93532_at   | 1416889_at   | Tnni2         | troponin I, skeletal, fast 2                    | 1.63  | 0.05 | -3.54  | 0.2506 | -2.91  | 0.2929 | -3.73  | 0.2417 | 1.14  | 0.4804 |
| 93533_at   | 1425674_a_at | 1500011L16Rik | RIKEN cDNA 1500011L16 gene                      | 1.43  | 0.15 | 1.02   | 0.7775 | 1.1    | 0.1286 | 1.09   | 0.1185 | -1.44 | 0.1019 |
| 93535_at   | 1419866_s_at | Sca2          | spinocerebellar ataxia 2 homolog (human)        | 1.25  | 0.43 | 1.21   | 0.0667 | 1.03   | 0.6814 | 1.14   | 0.1101 | 1.11  | 0.4905 |
| 93536_at   | 1416837_at   | Bax           | Bcl2-associated X protein                       | 1.12  | 0.74 | 1.09   | 0.3865 | 1.05   | 0.5955 | 1.23   | 0.1693 | -1.16 | 0.529  |
| 93538_at   | 1448706_at   | Ttrap         | Traf and Tnf receptor associated protein        | 1.43  | 0.21 | 1.29   | 0.0208 | 1.53   | 0.0065 | 1.14   | 0.262  | -1.06 | 0.7021 |
| 93539_at   | 1452586_at   | Anapc13       | anaphase promoting complex subunit 13           | 1.44  | 0    | -1.03  | 0.5645 | 1.08   | 0.4838 | 1.01   | 0.8582 | 1     | 0.9631 |
| 93540_at   | 1448333_at   | Adprh         | ADP-ribosylarginine hydrolase                   | -1.26 | 0.26 | -1.06  | 0.3712 | -1.02  | 0.7186 | 1.06   | 0.5237 | 1.06  | 0.3737 |
| 93541_at   | 1423505_at   | Tagln         | transgelin                                      | 1.52  | 0.05 | 1.08   | 0.5801 | 1.07   | 0.6368 | 1.12   | 0.3841 | 1.17  | 0.1195 |
| 93542_at   | 1417667_a_at | Pter          | phosphotriesterase related                      | -1.44 | 0.11 | -1.03  | 0.7919 | 1.24   | 0.217  | -1.31  | 0.0222 | -1.32 | 0.1443 |
| 93543_f_at | 1448330_at   | Gstm1         | glutathione S-transferase, mu 1                 | 1.04  | 0.77 | 1.21   | 0.0007 | 1.08   | 0.0804 | 1.24   | 0.0001 | 1.75  | 0.0003 |
| 93547_at   | 1460716_a_at | Cbfb          | core binding factor beta                        | -1.47 | 0.01 | -1.06  | 0.36   | 1.01   | 0.8976 | -1.04  | 0.5988 | 1.04  | 0.5641 |
| 93548_at   | 1417083_at   | Sec61b        | Sec61 beta subunit                              | -1.31 | 0.53 | -1.09  | 0.1027 | 1.05   | 0.4245 | -1.01  | 0.8982 | -1.48 | 0.1005 |
| 93550_at   | 1420731_a_at | Csrp2         | cysteine and glycine-rich protein 2             | 1.3   | 0.38 | 1.09   | 0.2978 | 1.18   | 0.0244 | 1.11   | 0.1845 | 1.48  | 0.1757 |
| 93551_at   | 1428296_at   | Polr2l        | polymerase (RNA) II (DNA directed) polypep      | 1.11  | 0.63 | -1.28  | 0.0403 | 1.08   | 0.5709 | -1.23  | 0.0762 | -1.12 | 0.2424 |
| 93555_at   | 1427118_at   | Krt2-19       | keratin complex 2, basic, gene 19               | 1.1   | 0.67 | 1.04   | 0.7506 | 1.24   | 0.0015 | 1.07   | 0.3112 | 1.12  | 0.3989 |
| 93556_at   | 1427365_at   | Krt2-10       | keratin complex 2, basic, gene 10               | -1.21 | 0.24 | -1.13  | 0.2543 | -1.2   | 0.0937 | -1.12  | 0.2248 | 1.13  | 0.1282 |
| 93557_at   | 1449040_a_at | Sehps2        | selenophosphate synthetase 2                    | -1.06 | 0.6  | 1.22   | 0.0306 | 1.03   | 0.6804 | 1.33   | 0.0039 | -1.01 | 0.9738 |
| 93559_at   | 1416135_at   | Apex1         | apurinic/aprimidinic endonuclease 1             | 1.14  | 0.65 | -1.11  | 0.0416 | 1.05   | 0.3763 | -1.03  | 0.5125 | -1.39 | 0.0292 |
| 93560_at   | 1450095_a_at | Acyp1         | acylphosphatase 1, erythrocyte (common) ty      | 1.41  | 0.15 | 1.01   | 0.864  | 1.17   | 0.1312 | 1.01   | 0.8684 | -1.23 | 0.125  |
| 93561_at   | 1423779_at   | Chchd6        | coiled-coil-helix-coiled-coil-helix domain con  | 3.14  | 0.04 | 1.34   | 0.2127 | 1.37   | 0.3046 | 1.33   | 0.2902 | 1.59  | 0.207  |

|            |              |                |                                                 |       |      |       |        |       |        |       |        |       |        |
|------------|--------------|----------------|-------------------------------------------------|-------|------|-------|--------|-------|--------|-------|--------|-------|--------|
| 93562_at   | 1416547_at   | Ndufb3         | NADH dehydrogenase (ubiquinone) 1 beta s        | 1.74  | 0.02 | 1.07  | 0.5352 | 1.1   | 0.4489 | 1.05  | 0.625  | -1.4  | 0.0038 |
| 93563_s_at | 1423516_a_at | Nid2           | nidogen 2                                       | -1.26 | 0.43 | -1.27 | 0.4126 | -1.06 | 0.8827 | -1.47 | 0.1693 | 1.06  | 0.8498 |
| 93564_at   | 1460638_at   | Yars           | tyrosyl-tRNA synthetase                         | 1     | 1    | -1.3  | 0.0015 | 1.02  | 0.7905 | -1.23 | 0.0183 | -1.07 | 0.4513 |
| 93565_at   | 1417005_at   | Kns2           | kinesin 2                                       | -1.1  | 0.59 | 1.21  | 0.054  | 1.37  | 0.0028 | 1.12  | 0.3091 | 1     | 0.9917 |
| 93567_at   | 1418210_at   | Pfn2           | profilin 2                                      | 1.8   | 0.25 | 2.01  | 0.1123 | 1.7   | 0.1077 | 1.59  | 0.1411 | -1.65 | 0.3319 |
| 93569_f_at | 1452731_x_at | 2610042L04Rik  | RIKEN cDNA 2610042L04 gene                      | 1.34  | 0.54 | 1.7   | 0.1954 | 2.25  | 0.0571 | 2.78  | 0.036  | -2.4  | 0.222  |
| 93570_at   | 1422856_at   | Slc12a3        | solute carrier family 12, member 3              | -1.55 | 0.01 | 1.18  | 0.5208 | 1.35  | 0.3389 | 1.14  | 0.6794 | 1.67  | 0.138  |
| 93571_at   | 1452143_at   | Spnb2          | spectrin beta 2                                 | -1.07 | 0.17 | -1.02 | 0.5536 | 1.02  | 0.647  | 1.01  | 0.9061 | 1.3   | 0.0254 |
| 93572_at   | 1425143_a_at | Ndufs1         | NADH dehydrogenase (ubiquinone) Fe-S pr         | 1.48  | 0.03 | 1.09  | 0.2398 | 1.18  | 0.0426 | 1.24  | 0.0077 | 1.08  | 0.3049 |
| 93573_at   | 1422557_s_at | Mt1            | metallothionein 1                               | 8.98  | 0.03 | 1.6   | 0.0085 | -1.44 | 0.1221 | 1.16  | 0.3193 | 3.02  | 0.0064 |
| 93574_at   | 1416168_at   | Serpinf1       | serine (or cysteine) proteinase inhibitor, clac | 1.42  | 0.15 | -1.02 | 0.7529 | -1.29 | 0.0078 | -1.13 | 0.1608 | -1.22 | 0.1582 |
| 93575_at   | 1419595_a_at | Ggh            | gamma-glutamyl hydrolase                        | 1.28  | 0.21 | 1     | 0.9704 | 1.06  | 0.61   | -1.16 | 0.1584 | 1.24  | 0.1379 |
| 93579_at   | 1417064_at   | Jagn1          | jagunal homolog 1 (Drosophila)                  | 1     | 0.99 | -1.06 | 0.5268 | 1.15  | 0.0577 | -1.06 | 0.3656 | -1.1  | 0.4641 |
| 93580_at   | 1418016_at   | Pum2           | pumilio 2 (Drosophila)                          | 1.14  | 0.27 | 1.22  | 0.0002 | 1.16  | 0.0062 | 1.22  | 0.0008 | 1.17  | 0.0602 |
| 93581_at   | 1448198_a_at | Ndufb8         | NADH dehydrogenase (ubiquinone) 1 beta s        | 2.75  | 0.01 | -1    | 0.9299 | -1.08 | 0.3599 | 1.02  | 0.7201 | -1.32 | 0.0575 |
| 93582_at   | 1416665_at   | Coq7           | demethyl-Q 7                                    | 2.38  | 0.02 | 1.17  | 0.0681 | 1.19  | 0.1415 | 1.48  | 0.0014 | 1.29  | 0.0943 |
| 93583_s_at | 1427329_a_at | Igh-6          | immunoglobulin heavy chain 6 (heavy chain       | -1.2  | 0.37 | -1.29 | 0.0055 | -1.57 | 0.0008 | -1.27 | 0.0138 | 1.66  | 0.0009 |
| 93585_at   | 1417651_at   | Cyp2c29        | cytochrome P450, family 2, subfamily c, poly    | 1.61  | 0.16 | 1.2   | 0.1845 | -1.09 | 0.256  | 1.3   | 0.0492 | 1.54  | 0.0008 |
| 93586_at   | 1448577_x_at | Syngn2         | synaptogyrin 2                                  | -1.19 | 0.08 | -1.01 | 0.9243 | -1.02 | 0.7353 | 1.04  | 0.5875 | 1.12  | 0.2926 |
| 93587_at   | 1416137_at   | Anxa7          | annexin A7                                      | 1.31  | 0.32 | 1.16  | 0.163  | 1.07  | 0.3061 | 1.29  | 0.005  | 1.07  | 0.7213 |
| 93588_at   | 1419462_s_at | Gtl3           | gene trap locus 3                               | 1.51  | 0.04 | 1.3   | 0.0449 | 1.45  | 0.0086 | 1.67  | 0.0001 | 1.26  | 0.3729 |
| 93589_at   | 1449190_a_at | Entpd4         | ectonucleoside triphosphate diphosphohydr       | -1.29 | 0.14 | -1.02 | 0.7171 | -1.15 | 0.0896 | -1.02 | 0.7696 | -1.13 | 0.3694 |
| 93590_at   | 1428367_at   | Ndst1          | N-deacetylase/N-sulfotransferase (heparan s     | 1.09  | 0.7  | -1.01 | 0.8649 | -1.04 | 0.7521 | -1.25 | 0.0584 | -1.14 | 0.5344 |
| 93591_at   | 1448644_at   | 26000002E23Rik | RIKEN cDNA 26000002E23 gene                     | 1.94  | 0.02 | -1.08 | 0.3754 | -1.1  | 0.3882 | -1.09 | 0.2982 | -1.31 | 0.4461 |
| 93592_at   | 1416371_at   | Apod           | apolipoprotein D                                | 1.37  | 0.68 | -1.03 | 0.89   | -1.14 | 0.4929 | 1.16  | 0.6159 | 1.59  | 0.252  |
| 93594_r_at | 1417104_at   | Emp3           | epithelial membrane protein 3                   | -2.08 | 0.04 | 1     | 0.9761 | -1.05 | 0.4735 | -1.15 | 0.0657 | 1.32  | 0.0079 |
| 93595_at   | 1448313_at   | Cln2           | ceroid-lipofuscinosis, neuronal 2               | -1.74 | 0.03 | -1.02 | 0.7492 | -1.02 | 0.6745 | -1.13 | 0.0276 | 1.07  | 0.6379 |
| 93596_i_at | 1416567_s_at | Atp5e          | ATP synthase, H+ transporting, mitochondri      | 1.18  | 0.63 | 1.17  | 0.0979 | 1.24  | 0.012  | 1.15  | 0.2178 | -1.15 | 0.3591 |
| 93598_at   | 1417648_s_at | Snx5           | sorting nexin 5                                 | 1.54  | 0.04 | -1.24 | 0.0376 | -1.35 | 0.0159 | -1.14 | 0.0754 | -1.02 | 0.9137 |
| 93599_at   | 1423408_a_at | 2500003M10Rik  | RIKEN cDNA 2500003M10 gene                      | 1.77  | 0.04 | -1.12 | 0.1032 | -1.12 | 0.2303 | -1.05 | 0.3253 | -1.05 | 0.7349 |
| 93600_at   | 1424438_a_at | Leprot         | leptin receptor overlapping transcript          | 1.06  | 0.78 | 1.15  | 0.2721 | 1.08  | 0.4546 | 1.14  | 0.2435 | 1.35  | 0.0807 |
| 93601_at   | 1450746_at   | Keap1          | kelch-like ECH-associated protein 1             | 2.82  | 0.01 | -1.16 | 0.4558 | 1     | 0.9819 | -1.43 | 0.0273 | 1.63  | 0.0301 |
| 93602_at   | 1448498_at   | Rps6ka4        | ribosomal protein S6 kinase, polypeptide 4      | -1    | 0.99 | 1.05  | 0.5201 | 1.13  | 0.1818 | 1.07  | 0.6624 | 1.56  | 0.084  |
| 93603_at   | 1448849_at   | Mrpl40         | mitochondrial ribosomal protein L40             | 1.29  | 0.09 | 1.06  | 0.2832 | 1.04  | 0.316  | 1.08  | 0.053  | -1.04 | 0.674  |
| 93605_r_at | 1417376_a_at | Igslf4a        | immunoglobulin superfamily, member 4A           | 1.22  | 0.52 | 1.07  | 0.5743 | -1.04 | 0.7028 | 1.05  | 0.5976 | 1.38  | 0.2109 |
| 93608_at   | 1449222_at   | Ebi3           | Epstein-Barr virus induced gene 3               | 2.81  | 0.12 | 1.07  | 0.746  | -1.04 | 0.7647 | 1.11  | 0.462  | 1.46  | 0.1892 |
| 93609_at   | 1424876_s_at | Spgp20         | spastic paraplegia 20, spartin (Troyer syndr    | 1.15  | 0.47 | -1.02 | 0.8938 | 1.08  | 0.5377 | -1.08 | 0.4876 | 1.19  | 0.6039 |
| 93611_at   | 1449868_at   | Tbx6           | T-box 6                                         | 1.44  | 0.1  | 1.16  | 0.2476 | 1.13  | 0.3424 | 1.04  | 0.7915 | 1.42  | 0.0141 |
| 93612_at   | 1422597_at   | Mmp15          | matrix metalloproteinase 15                     | -1.34 | 0.13 | -1.13 | 0.1693 | -1.18 | 0.282  | -1.24 | 0.1167 | 1.1   | 0.7061 |
| 93618_at   | 1452269_at   | Spnb3          | spectrin beta 3                                 | 1.05  | 0.58 | -1.08 | 0.4062 | -1.05 | 0.7259 | -1.04 | 0.69   | -1.18 | 0.4444 |
| 93619_at   | 1449851_at   | Per1           | period homolog 1 (Drosophila)                   | 1.32  | 0.55 | 1.04  | 0.8194 | 1.42  | 0.174  | 1.45  | 0.0165 | 2.33  | 0.1741 |
| 93620_at   | 1417775_at   | Rpo1-4         | RNA polymerase 1-4                              | 1.27  | 0.05 | -1.01 | 0.9053 | 1.13  | 0.1622 | 1.13  | 0.1835 | 1.33  | 0.1803 |
| 93621_at   | 1434400_at   | Tgif2          | TGFB-induced factor 2                           | -1.57 | 0.04 | 1.43  | 0.0045 | 1.23  | 0.0531 | 1.27  | 0.0337 | 1.59  | 0.0278 |
| 93623_at   | 1448665_at   | Dmd            | dystrophin, muscular dystrophy                  | -1.33 | 0.49 | 1.24  | 0.2578 | 1.28  | 0.2841 | 1.46  | 0.0279 | 1.07  | 0.8806 |
| 93624_at   | 1428776_at   | 8430417G17Rik  | RIKEN cDNA 8430417G17 gene                      | 1.12  | 0.8  | 1.24  | 0.1197 | 1.17  | 0.2859 | 1.15  | 0.4688 | 1.35  | 0.5184 |
| 93625_at   | 1418833_at   | Agxt           | alanine-glyoxylate aminotransferase             | 1.95  | 0.05 | 1.32  | 0.0015 | 1.01  | 0.859  | 1.31  | 0.0288 | 1.43  | 0.0184 |
| 93626_at   | 1422906_at   | Abcg2          | ATP-binding cassette, sub-family G (WHITE       | -1.36 | 0.34 | 1.86  | 0.0011 | 1.1   | 0.4676 | 2.51  | 0      | -2.68 | 0.0008 |
| 93627_at   | 1454801_at   | ---            | ---                                             | 1.24  | 0.46 | 1.02  | 0.7788 | 1.34  | 0.0565 | 1.16  | 0.193  | 1.05  | 0.7591 |
| 93628_at   | 1420571_at   | Prlpb          | prolactin-like protein B                        | -1.3  | 0.71 | 1.09  | 0.5432 | 1.3   | 0.0755 | 1.09  | 0.652  | 1.48  | 0.0463 |
| 93630_at   | 1425932_a_at | Cugbp1         | CUG triplet repeat, RNA binding protein 1       | -3.77 | 0.26 | -1.24 | 0.3007 | -1.27 | 0.313  | -1.62 | 0.0608 | -1.29 | 0.4355 |
| 93632_g_at | 1427646_a_at | Arhgef2        | rho/rac guanine nucleotide exchange factor      | 1.04  | 0.86 | -1.03 | 0.8001 | -1.11 | 0.4191 | -1.12 | 0.2962 | 1.06  | 0.727  |
| 93633_at   | 1419217_at   | MGI:1351630    | guanine nucleotide exchange factor (RCC1)       | 1.87  | 0.49 | -1.25 | 0.5881 | 1.13  | 0.7662 | -1.07 | 0.8743 | -1.01 | 0.9589 |
| 93635_at   | 1448946_at   | Kif3c          | kinesin family member 3C                        | -1.28 | 0.13 | -1.21 | 0.6533 | 1.27  | 0.5444 | 1.15  | 0.7308 | 3.48  | 0.0325 |

|            |              |                |                                                  |       |      |       |        |       |        |        |        |       |        |
|------------|--------------|----------------|--------------------------------------------------|-------|------|-------|--------|-------|--------|--------|--------|-------|--------|
| 93636_at   | 1436588_at   | Rttm           | rotatin                                          | -1.16 | 0.23 | -1.08 | 0.3488 | -1    | 0.9751 | -1.15  | 0.1476 | 1.52  | 0.1351 |
| 93637_at   | 1418353_at   | Cd5            | CD5 antigen                                      | -1.63 | 0.42 | -1.06 | 0.6727 | 1.05  | 0.8131 | 1.46   | 0.195  | -1.39 | 0.2805 |
| 93638_s_at | 1424931_s_at | IgI-V1         | immunoglobulin lambda chain, variable 1          | 1.57  | 0.08 | 1.06  | 0.6446 | -1.2  | 0.1862 | -1.16  | 0.3246 | 1.34  | 0.3223 |
| 93640_s_at | 1453249_a_at | Tex21          | testis expressed gene 21                         | -1.64 | 0.21 | -1    | 0.9993 | 1.04  | 0.7238 | 1.78   | 0.2065 | 1.12  | 0.7627 |
| 93642_at   | 1416900_s_at | Gdf1 /// Lass1 | growth differentiation factor 1 /// longevity as | -1.33 | 0.63 | 1.04  | 0.7151 | 1.17  | 0.01   | -1.05  | 0.5449 | 1.34  | 0.1987 |
| 93643_at   | 1419324_at   | Lhx9           | LIM homeobox protein 9                           | -1.37 | 0.24 | 1.33  | 0.0248 | 1.11  | 0.346  | 1.01   | 0.9299 | -1.02 | 0.9385 |
| 93645_at   | 1450659_at   | Rgs7           | regulator of G protein signaling 7               | -1.5  | 0.53 | -1.59 | 0.1188 | -1.08 | 0.8243 | -1.47  | 0.21   | 1.47  | 0.5027 |
| 93646_at   | 1420873_at   | Ptk9           | protein tyrosine kinase 9                        | 2.18  | 0.24 | 1.03  | 0.8841 | -1.19 | 0.4849 | -1.1   | 0.6562 | 1.32  | 0.6921 |
| 93647_at   | 1428784_at   | Gmip           | Gem-interacting protein                          | -2.06 | 0.37 | 1.7   | 0.0457 | 1.06  | 0.8392 | 1.95   | 0.1366 | 2.23  | 0.1143 |
| 93648_at   | 1421446_at   | Prkcc          | protein kinase C, gamma                          | 1.07  | 0.87 | -1.24 | 0.0602 | 1.05  | 0.566  | -1.23  | 0.0348 | -1.03 | 0.7648 |
| 93651_r_at | 1450837_at   | Prh1           | proline rich protein HaeIII subfamily 1          | 1.87  | 0.19 | -1.62 | 0.0418 | -1.49 | 0.0795 | -1.3   | 0.2405 | -1.42 | 0.4074 |
| 93654_at   | 1451693_a_at | Fgf12          | fibroblast growth factor 12                      | -2.91 | 0.05 | 1.11  | 0.5481 | 1.38  | 0.2703 | 1.02   | 0.9216 | 1.07  | 0.8377 |
| 93657_at   | 1460407_at   | SpiB           | Spi-B transcription factor (Spi-1/PU.1 relatec   | 1.05  | 0.94 | -1.66 | 0.0693 | -1.59 | 0.0448 | -1.35  | 0.1805 | 1.78  | 0.2282 |
| 93658_at   | 1418759_at   | Ptpn20         | protein tyrosine phosphatase, non-receptor 1     | -1.92 | 0.53 | 1.67  | 0.0602 | -1.01 | 0.9313 | 2.44   | 0.2238 | 4.76  | 0.1109 |
| 93660_at   | 1452453_a_at | Camk2a         | calcium/calmodulin-dependent protein kinas       | 1.01  | 0.81 | 1.19  | 0.2143 | 1.18  | 0.2303 | 1.13   | 0.3315 | 1.18  | 0.1458 |
| 93661_at   | 1422701_at   | Zap70          | zeta-chain (TCR) associated protein kinase       | -3.28 | 0.09 | -7.81 | 0      | -1.14 | 0.2619 | -12.99 | 0      | -3.6  | 0.0013 |
| 93663_r_at | 1439749_at   | Zap70          | zeta-chain (TCR) associated protein kinase       | -1.43 | 0.16 | 1.23  | 0.2799 | 1.09  | 0.3856 | 1.32   | 0.0578 | 1.19  | 0.4713 |
| 93664_at   | 1422009_at   | Atp1b2         | ATPase, Na+/K+ transporting, beta 2 polype       | -1.41 | 0.12 | 1.01  | 0.962  | 1.01  | 0.9756 | 1.08   | 0.7507 | 1.32  | 0.3553 |
| 93667_at   | 1424986_s_at | Fbxw7          | F-box and WD-40 domain protein 7, archipe        | -1.91 | 0.42 | 1.03  | 0.7873 | -1.1  | 0.3578 | -1.06  | 0.6734 | -1.13 | 0.5475 |
| 93668_at   | 1450823_at   | Og9x           | OG9 homeobox gene                                | 1.3   | 0.02 | -1.01 | 0.8587 | 1.09  | 0.5987 | -1.06  | 0.3401 | 1.18  | 0.3322 |
| 93669_f_at | 1436790_a_at | Sox11          | SRY-box containing gene 11                       | -2.25 | 0.38 | -1.44 | 0.2725 | 1.72  | 0.2944 | -1.03  | 0.934  | 1.67  | 0.4702 |
| 93670_at   | 1435561_at   | Erf            | Ets2 repressor factor                            | 1.33  | 0.4  | 1.35  | 0.0003 | -1.03 | 0.7789 | 1.4    | 0.0079 | 1.5   | 0.1246 |
| 93671_at   | 1422114_at   | Erf            | Ets2 repressor factor                            | -1.74 | 0.03 | -1.13 | 0.1635 | -1.01 | 0.8774 | -1.14  | 0.1861 | -1.1  | 0.2849 |
| 93672_at   | 1422005_at   | Prkr           | protein kinase, interferon-inducible double st   | -1.32 | 0.19 | 1     | 0.9685 | -1.01 | 0.9437 | -1.32  | 0.0601 | -1.08 | 0.8025 |
| 93673_at   | 1449281_at   | Nrtn           | neurturin                                        | -1.4  | 0    | 1.18  | 0.0692 | 1.28  | 0.0317 | 1.26   | 0.0244 | 1.16  | 0.2602 |
| 93674_at   | 1416865_at   | Fgd1           | FYVE, RhoGEF and PH domain containing            | 1.01  | 0.99 | 1.89  | 0.0674 | 1.24  | 0.3404 | 1.86   | 0.0486 | 3.13  | 0.0013 |
| 93676_at   | 1448899_s_at | Rad51ap1       | RAD51 associated protein 1                       | 1.02  | 0.95 | -1.11 | 0.1173 | -1.05 | 0.6219 | -1.13  | 0.0604 | 1.03  | 0.8473 |
| 93677_at   | 1460245_at   | KlrD1          | killer cell lectin-like receptor, subfamily D, m | -1.19 | 0.43 | 1.48  | 0.1916 | -1.23 | 0.5048 | 1.68   | 0.0924 | -1.24 | 0.5974 |
| 93678_s_at | 1450495_a_at | Klrk1          | killer cell lectin-like receptor subfamily K, me | -1.14 | 0.62 | 1.12  | 0.6984 | -1.23 | 0.4906 | 1.35   | 0.43   | -1.84 | 0.0482 |
| 93680_at   | 1417751_at   | Stk10          | serine/threonine kinase 10                       | 3.37  | 0.03 | 1.33  | 0.0215 | 1.06  | 0.5679 | 1.47   | 0.014  | -1.22 | 0.364  |
| 93681_at   | 1418533_s_at | Fzd2           | frizzled homolog 2 (Drosophila)                  | -3.45 | 0.03 | 1.31  | 0.3037 | 1.6   | 0.2586 | 1.54   | 0.3241 | 2.47  | 0.17   |
| 93682_at   | 1421101_a_at | Ldb2           | LIM domain binding 2                             | -1.33 | 0.11 | -1.12 | 0.1962 | -1.14 | 0.0692 | -1.09  | 0.2483 | 1.16  | 0.1797 |
| 93683_at   | 1450680_at   | Rag1           | recombination activating gene 1                  | -1.22 | 0.64 | -1.7  | 0.1788 | 1.35  | 0.5187 | -1.58  | 0.2493 | 2.08  | 0.0147 |
| 93687_r_at | 1427669_a_at | Cit            | citron                                           | -1.77 | 0.03 | -1.26 | 0.3064 | -1.05 | 0.6961 | -1.32  | 0.0158 | -1.14 | 0.7667 |
| 93688_at   | 1428043_a_at | Cmah           | cytidine monophospho-N-acetylneuraminic a        | -1.59 | 0.28 | -4.8  | 0.0036 | -3.57 | 0.0085 | -6.89  | 0.0021 | -8.59 | 0.0734 |
| 93689_at   | 1449581_at   | Emid1          | EMI domain containing 1                          | 1.4   | 0.53 | 1.08  | 0.4209 | -1.06 | 0.6281 | 1.01   | 0.9217 | 1.21  | 0.4674 |
| 93691_s_at | 1425457_a_at | Grb10          | growth factor receptor bound protein 10          | -1.78 | 0.17 | -1.09 | 0.5397 | -1.42 | 0.0759 | -1.09  | 0.4901 | -1.01 | 0.9671 |
| 93692_f_at | 1449417_at   | Ambn           | ameloblastin                                     | -1.26 | 0.74 | 1.18  | 0.6432 | -1.27 | 0.4557 | -1.55  | 0.1776 | 1.85  | 0.0396 |
| 93694_at   | 1417602_at   | Per2           | period homolog 2 (Drosophila)                    | 2.22  | 0.35 | 1.27  | 0.0648 | 1.37  | 0.0962 | 1.46   | 0.0014 | 1.25  | 0.4715 |
| 93696_at   | 1425723_at   | Nr1i2          | nuclear receptor subfamily 1, group I, memb      | 1.58  | 0.05 | -1.04 | 0.6564 | -1.08 | 0.4079 | 1      | 0.9803 | 1.57  | 0.0182 |
| 93697_at   | 1419583_at   | Cbx4           | chromobox homolog 4 (Drosophila Pc class)        | -1.19 | 0.49 | 1.15  | 0.3401 | -1.03 | 0.761  | 1.26   | 0.0552 | -1.12 | 0.2682 |
| 93698_at   | 1450191_a_at | Sox13          | SRY-box containing gene 13                       | -1.58 | 0    | -1.08 | 0.0243 | -1.12 | 0.0108 | -1.11  | 0.0223 | 1.02  | 0.8372 |
| 93699_at   | 1450816_at   | Polg2          | polymerase (DNA directed), gamma 2, acce         | 1.62  | 0.12 | 1.05  | 0.5893 | 1.02  | 0.9028 | 1.16   | 0.1057 | -1.14 | 0.3841 |
| 93701_at   | 1424207_at   | Smarca5        | SWI/SNF related, matrix associated, actin di     | -1.88 | 0.04 | 1.11  | 0.3012 | 1.08  | 0.4726 | 1.05   | 0.5411 | 1.23  | 0.4336 |
| 93702_at   | 1427128_at   | Ptpn23         | protein tyrosine phosphatase, non-receptor 1     | -1.19 | 0.7  | 1.13  | 0.4846 | 1     | 0.9976 | 1.25   | 0.1465 | 1.67  | 0.12   |
| 93703_at   | 1417845_at   | Cldn6          | claudin 6                                        | 1.28  | 0.52 | 1.24  | 0.2183 | -1.44 | 0.192  | -1.29  | 0.3147 | 1.22  | 0.6252 |
| 93704_at   | 1423013_at   | Foxf1a         | forkhead box F1a                                 | 1.14  | 0.81 | 1.04  | 0.9    | 1.04  | 0.9    | 1.36   | 0.3245 | 1.8   | 0.0734 |
| 93705_at   | 1420682_at   | Chrnb1         | cholinergic receptor, nicotinic, beta polypept   | 1.37  | 0.43 | -1.01 | 0.888  | 1.03  | 0.7949 | -1     | 0.9988 | 1.26  | 0.0908 |
| 93706_at   | 1426333_a_at | Ikbkb          | inhibitor of kappaB kinase beta                  | 1.41  | 0.34 | -1.22 | 0.0259 | -1.25 | 0.0515 | -1.24  | 0.0073 | 1.03  | 0.7567 |
| 93708_at   | 1421646_a_at | Pias3          | protein inhibitor of activated STAT 3            | -1.62 | 0    | 1.01  | 0.9522 | 1.13  | 0.23   | -1.05  | 0.6176 | -1.01 | 0.9749 |
| 93709_at   | 1449952_s_at | Trmprs8        | transmembrane protease, serine 8 (intestina      | 1.56  | 0.27 | -1.34 | 0.0659 | -1.08 | 0.6644 | -1.52  | 0.0368 | 1.26  | 0.6549 |
| 93710_at   | 1450540_x_at | Krtap5-1       | keratin associated protein 5-1                   | 1.03  | 0.89 | 1.07  | 0.4853 | 1.03  | 0.656  | 1.07   | 0.2776 | 1.37  | 0.0911 |
| 93712_at   | 1419313_at   | Ccnt1          | cyclin T1                                        | 1.24  | 0.53 | -1.09 | 0.487  | 1.01  | 0.9309 | -1.17  | 0.0893 | 1.2   | 0.5932 |

|            |              |               |                                                  |       |      |       |        |       |        |       |        |       |        |
|------------|--------------|---------------|--------------------------------------------------|-------|------|-------|--------|-------|--------|-------|--------|-------|--------|
| 93713_at   | 1422853_at   | Shc1          | src homology 2 domain-containing transforr       | 2.21  | 0.01 | -1.34 | 0.1047 | -1.47 | 0.0943 | -1.9  | 0.0023 | -2.73 | 0.1137 |
| 93717_at   | 1419282_at   | Ccl12         | chemokine (C-C motif) ligand 12                  | -1.11 | 0.68 | -1.32 | 0.3652 | -1.08 | 0.7912 | -1.11 | 0.7561 | -1.17 | 0.4311 |
| 93718_at   | 1422399_a_at | Rab23         | RAB23, member RAS oncogene family                | -1.69 | 0.41 | -1.46 | 0.0116 | -1.46 | 0.0278 | -1.47 | 0.002  | 1.04  | 0.9409 |
| 93720_at   | 1421024_at   | Agpat1        | 1-acylglycerol-3-phosphate O-acyltransferas      | -2.09 | 0.12 | -1.13 | 0.122  | -1.22 | 0.0735 | -1.32 | 0.0067 | 1.23  | 0.4142 |
| 93721_at   | 1417462_at   | Cap1          | CAP, adenylate cyclase-associated protein        | -1.18 | 0.7  | 1.44  | 0.1372 | -1.18 | 0.495  | -1.03 | 0.8679 | 1.13  | 0.1834 |
| 93724_at   | 1423428_at   | Ror2          | receptor tyrosine kinase-like orphan recepto     | 1.03  | 0.93 | -1.01 | 0.9712 | -1.24 | 0.4667 | 1.01  | 0.9565 | 1.37  | 0.153  |
| 93727_at   | 1452168_x_at | Gspt1         | G1 to S phase transition 1                       | -1.04 | 0.78 | 1.11  | 0.0671 | 1.28  | 0.084  | 1.1   | 0.3099 | -1.38 | 0.205  |
| 93728_at   | 1454758_a_at | Tgfb1i4       | transforming growth factor beta 1 induced tr:    | 1.37  | 0.4  | -1.35 | 0.1556 | -1.48 | 0.0344 | -1.46 | 0.0334 | -6.12 | 0.0084 |
| 93729_at   | 1421836_at   | ---           | ---                                              | -2.14 | 0.03 | -1.22 | 0.0259 | -1.05 | 0.4263 | -1.08 | 0.4227 | -1.45 | 0.0941 |
| 93730_at   | 1453467_s_at | Rps15a        | ribosomal protein S15a                           | 1.01  | 0.91 | 1.16  | 0.0086 | 1.4   | 0.0114 | 1.29  | 0.0058 | 1.98  | 0.0002 |
| 93731_at   | 1437687_x_at | Fkbp9         | FK506 binding protein 9                          | 1.24  | 0.02 | 1.03  | 0.6485 | 1.07  | 0.3633 | 1.07  | 0.3359 | 1.08  | 0.1963 |
| 93733_r_at | 1422763_at   | Rgs19ip1      | regulator of G-protein signaling 19 interactin   | -1.07 | 0.73 | 1.52  | 0.0321 | 1.3   | 0.2921 | 2.08  | 0.0625 | 1.27  | 0.1254 |
| 93735_f_at | 1416282_at   | Psmc3         | proteasome (prosome, macropain) 26S subu         | 1.52  | 0.07 | 1.06  | 0.314  | 1.08  | 0.262  | 1.16  | 0.0154 | -1.28 | 0.0299 |
| 93736_at   | 1448200_at   | Tcn2          | transcobalamin 2                                 | 1.03  | 0.93 | -1.15 | 0.1963 | -1.11 | 0.3577 | -1.32 | 0.0054 | 1.86  | 0.0245 |
| 93737_at   | 1421901_at   | Eif2ak1       | eukaryotic translation initiation factor 2 alph  | -1.44 | 0.25 | 1.09  | 0.1693 | 1.08  | 0.2522 | 1.11  | 0.0649 | -1.05 | 0.8791 |
| 93738_at   | 1434773_a_at | Slc2a1        | solute carrier family 2 (facilitated glucose tra | 4.11  | 0    | 1.25  | 0.3538 | -3.75 | 0      | 1.25  | 0.4262 | 1.01  | 0.9822 |
| 93742_at   | 1449933_a_at | 5730449L18Rik | RIKEN cDNA 5730449L18 gene                       | 1.18  | 0.23 | -1.13 | 0.2884 | -1.23 | 0.0797 | -1.26 | 0.0899 | 1.18  | 0.2945 |
| 93743_at   | 1423906_at   | Hsbp1         | heat shock factor binding protein 1              | 1.02  | 0.94 | -1.11 | 0.2843 | -1.19 | 0.1068 | -1.11 | 0.3153 | -1.57 | 0.0015 |
| 93744_at   | 1450633_at   | Calm4         | calmodulin 4                                     | -1.46 | 0.02 | 1.01  | 0.9628 | -1.02 | 0.8151 | -1.11 | 0.4021 | 1.19  | 0.1135 |
| 93747_at   | 1454698_at   | AW742319      | expressed sequence AW742319                      | 1.27  | 0.18 | 1.09  | 0.2548 | 1.17  | 0.1704 | 1.23  | 0.0229 | 1.11  | 0.2903 |
| 93748_at   | 1431390_a_at | Grin1a        | glutamate receptor, ionotropic, N-methyl D-      | -1.19 | 0.32 | 1.37  | 0.0111 | 1.14  | 0.1641 | 1.32  | 0.0128 | 1.48  | 0.0101 |
| 93749_at   | 1428667_at   | Maoa          | monoamine oxidase A                              | 1.9   | 0.02 | 1.01  | 0.9411 | 1.06  | 0.5761 | 1.06  | 0.558  | 1.32  | 0.007  |
| 93750_at   | 1415812_at   | Gsn           | gelsolin                                         | 1.9   | 0.04 | -1.59 | 0.2186 | -1.69 | 0.1682 | -1.32 | 0.4326 | 2.4   | 0.0416 |
| 93751_at   | 1455205_a_at | Usp19         | ubiquitin specific protease 19                   | -1.3  | 0.18 | 1.13  | 0.1135 | 1.1   | 0.381  | 1.1   | 0.1865 | 1.18  | 0.2045 |
| 93752_at   | 1452154_at   | Iars          | isoleucine-tRNA synthetase                       | -1.2  | 0.07 | -1.13 | 0.0539 | 1.12  | 0.0455 | -1.07 | 0.2989 | 1.08  | 0.5266 |
| 93753_at   | 1416303_at   | Litaf         | LPS-induced TN factor                            | -1.25 | 0.26 | 1.12  | 0.3873 | -1.28 | 0.0393 | 1.01  | 0.9552 | -1.58 | 0.0155 |
| 93754_at   | 1448491_at   | Ech1          | enoyl coenzyme A hydratase 1, peroxisomal        | 1.42  | 0.01 | 1.01  | 0.8681 | 1.35  | 0      | 1.13  | 0.2385 | 1.03  | 0.7331 |
| 93755_at   | 1418368_at   | Retnlb        | resistin like beta                               | -1.22 | 0.56 | 1.01  | 0.867  | 1.02  | 0.745  | 1.02  | 0.7874 | 1.91  | 0.1187 |
| 93757_at   | 1423670_a_at | Srpr          | signal recognition particle receptor ('docking   | -1.59 | 0.13 | -1.32 | 0.0041 | 1.21  | 0.0158 | 1.02  | 0.8182 | -1.44 | 0.0107 |
| 93758_at   | 1423092_at   | Incenp        | inner centromere protein                         | 1.05  | 0.92 | 1.09  | 0.3777 | 1.15  | 0.2161 | 1.41  | 0.0102 | 1.31  | 0.5905 |
| 93762_at   | 1448138_at   | Ppp2r4        | protein phosphatase 2A, regulatory subunit I     | -1.54 | 0.04 | -1.14 | 0.0776 | -1.13 | 0.1098 | -1.22 | 0.0135 | -1.13 | 0.0398 |
| 93764_at   | 1430713_s_at | MGI:1914434   | genes associated with retinoid-IFN-induced       | 1.31  | 0.47 | 1.41  | 0.0067 | 1.19  | 0.0194 | 1.44  | 0.0053 | 1.15  | 0.4944 |
| 93766_at   | 1448852_at   | ---           | ---                                              | -1.38 | 0    | -1.23 | 0.0005 | -1.13 | 0.0448 | -1.43 | 0      | -1.45 | 0.0015 |
| 93768_f_at | 1428237_at   | MGC90611      | similar to hypothetical protein FLJ10342         | -1.16 | 0.53 | 1.27  | 0.0245 | 1.11  | 0.4676 | 1.2   | 0.0147 | 1.23  | 0.2269 |
| 93769_at   | 1418962_at   | 1110005F07Rik | RIKEN cDNA 1110005F07 gene                       | -1.4  | 0.52 | 1.21  | 0.0672 | 1.05  | 0.6767 | 1.26  | 0.0558 | -1.04 | 0.8729 |
| 93770_at   | 1416809_at   | Cyp3a11       | cytochrome P450, family 3, subfamily a, pol      | 1.04  | 0.57 | 1.27  | 0.0004 | 1.2   | 0.0004 | 1.33  | 0      | 1.57  | 0.0036 |
| 93771_at   | 1448767_s_at | Gjb1          | gap junction membrane channel protein bet        | -1.42 | 0.39 | -1.62 | 0      | -1.36 | 0.0529 | -1.83 | 0.0001 | -1.66 | 0.0246 |
| 93773_f_at | 1454652_at   | Zfp265        | zinc finger protein 265                          | 1.21  | 0.39 | 1.25  | 0.0428 | 1.2   | 0.1925 | 1.32  | 0.0188 | -1.05 | 0.8578 |
| 93774_at   | 1448202_x_at | 2610524G07Rik | RIKEN cDNA 2610524G07 gene                       | -1.01 | 0.95 | 1.04  | 0.4309 | 1.01  | 0.749  | 1.1   | 0.0939 | 1.08  | 0.3246 |
| 93776_at   | 1438318_x_at | 1500001L15Rik | RIKEN cDNA 1500001L15 gene                       | 1.69  | 0.14 | 1.7   | 0.0077 | 1.47  | 0.1077 | 1.25  | 0.3391 | 1.54  | 0.2538 |
| 93777_at   | 1425173_s_at | Golph3l       | golgi phosphoprotein 3-like                      | 1.27  | 0.66 | 1.45  | 0.1622 | 1.16  | 0.5669 | 1.37  | 0.1578 | 1.61  | 0.3423 |
| 93779_at   | 1456635_at   | ---           | ---                                              | 1.24  | 0.37 | 1.25  | 0.5985 | -1.54 | 0.128  | 1.6   | 0.4296 | -1.05 | 0.8474 |
| 93780_at   | 1417316_at   | Them2         | thioesterase superfamily member 2                | 1.98  | 0    | 1.11  | 0.239  | 1.2   | 0.0942 | 1.14  | 0.3048 | 1.21  | 0.0947 |
| 93781_at   | 1416460_at   | Aldrl6        | aldehyde reductase (aldose reductase)-like       | -1.55 | 0.2  | -1.03 | 0.697  | 1.08  | 0.5517 | 1.06  | 0.6223 | 1.2   | 0.5598 |
| 93782_at   | 1423654_a_at | Rnf4          | ring finger protein 4                            | -1.04 | 0.8  | 1.18  | 0.0108 | 1.22  | 0.0249 | 1.15  | 0.0859 | 1.17  | 0.1126 |
| 93783_at   | 1423693_at   | Ela1          | elastase 1, pancreatic                           | -1.92 | 0    | -2.59 | 0      | -1.49 | 0.0314 | -2.63 | 0      | -4.13 | 0.0006 |
| 93784_at   | 1416742_at   | Cfdp1         | craniofacial development protein 1               | 2.4   | 0.03 | -1.13 | 0.2275 | -1.08 | 0.4245 | -1.03 | 0.7628 | 1.19  | 0.1481 |
| 93785_at   | 1450995_at   | Folr1         | folate receptor 1 (adult)                        | 1.18  | 0.66 | -2.16 | 0.0474 | -1.88 | 0.0751 | -2.07 | 0.0347 | 1.45  | 0.0565 |
| 93787_f_at | 1448373_at   | Mrpl18        | mitochondrial ribosomal protein L18              | -1.17 | 0.4  | 1.2   | 0.0375 | 1.21  | 0.097  | 1.3   | 0.0015 | 1.09  | 0.3099 |
| 93789_s_at | 1424355_a_at | Sin3b         | transcriptional regulator, SIN3B (yeast)         | 1.58  | 0.07 | 1.25  | 0.0014 | 1.33  | 0.0003 | 1.44  | 0      | 1.15  | 0.1904 |
| 93790_at   | 1425630_at   | Sin3b         | transcriptional regulator, SIN3B (yeast)         | -1.33 | 0.17 | 1.16  | 0.589  | -1.09 | 0.6914 | 1.13  | 0.6493 | -1.54 | 0.3101 |
| 93793_at   | 1460173_at   | Lasp1         | LIM and SH3 protein 1                            | -1.11 | 0.66 | -1.15 | 0.0747 | -1.37 | 0.0001 | -1.38 | 0.0022 | -1.68 | 0.0004 |
| 93794_at   | 1423781_at   | Appbp1        | amyloid beta precursor protein binding prote     | 1.44  | 0.12 | 1.32  | 0.0102 | 1.5   | 0.0594 | 1.49  | 0.0025 | -1.09 | 0.5895 |

|            |              |                    |                                                                                     |       |      |       |        |       |        |       |        |       |        |
|------------|--------------|--------------------|-------------------------------------------------------------------------------------|-------|------|-------|--------|-------|--------|-------|--------|-------|--------|
| 93795_at   | 1416448_at   | ltpa               | inosine triphosphatase (nucleoside triphosphatase)                                  | 1.84  | 0.08 | -1.06 | 0.4875 | -1.03 | 0.7051 | -1.12 | 0.0535 | -1.45 | 0.0699 |
| 93798_at   | 1423653_at   | Atp1a1             | ATPase, Na <sup>+</sup> /K <sup>+</sup> transporting, alpha 1 polyphosphatase       | 1.82  | 0.01 | -1.03 | 0.5799 | -1.25 | 0.0292 | -1.3  | 0.0003 | 1.35  | 0.015  |
| 93799_at   | 1433629_s_at | AI316787           | expressed sequence AI316787                                                         | -1.13 | 0.39 | 1     | 0.9781 | 1.16  | 0.1909 | -1    | 0.9968 | 1.01  | 0.935  |
| 93800_f_at | 1449378_at   | Krt1-c29           | keratin complex-1, acidic, gene C29                                                 | 1.04  | 0.93 | -1.15 | 0.4251 | 1.29  | 0.4159 | 1.76  | 0.0471 | 2.03  | 0.0649 |
| 93801_at   | 1418173_at   | 4631426H08Rik      | RIKEN cDNA 4631426H08 gene                                                          | -1.75 | 0.14 | 1.11  | 0.3189 | -1.02 | 0.8465 | -1.13 | 0.3388 | 1.26  | 0.6219 |
| 93802_at   | 1434882_at   | Mtdh               | Metadherin                                                                          | 1.15  | 0.36 | 1.11  | 0.228  | 1.28  | 0.1299 | 1.24  | 0.0672 | -1.07 | 0.8254 |
| 93803_at   | 1418078_at   | Psmc3              | proteaseome (prosome, macropain) 28 subunit                                         | -1.16 | 0.36 | -1.12 | 0.1333 | -1.11 | 0.1725 | -1.15 | 0.0319 | 1.04  | 0.7616 |
| 93805_at   | 1448643_at   | Ssna1              | Sjogren's syndrome nuclear autoantigen 1                                            | 1.5   | 0.41 | -1.02 | 0.7689 | -1.04 | 0.3617 | 1.02  | 0.776  | -1.03 | 0.8668 |
| 93806_at   | 1428107_at   | Sh3bgrl            | SH3-binding domain glutamic acid-rich protein                                       | 1.14  | 0.23 | -1.07 | 0.0956 | -1.01 | 0.9188 | -1.02 | 0.5784 | -1.5  | 0.0455 |
| 93807_at   | 1432322_at   | 2310016E02Rik      | RIKEN cDNA 2310016E02 gene                                                          | 1     | 1    | -1.05 | 0.8889 | 1.02  | 0.9658 | -1.1  | 0.7848 | 1.29  | 0.2585 |
| 93808_at   | 1418509_at   | Cbr2               | carbonyl reductase 2                                                                | -1.05 | 0.81 | 1.14  | 0.5807 | -1.07 | 0.7621 | -1.11 | 0.6254 | 2.39  | 0.0382 |
| 93809_at   | 1415742_at   | Aup1               | ancient ubiquitous protein                                                          | -1.12 | 0.28 | -1.11 | 0.0476 | -1.06 | 0.6457 | -1.19 | 0.0141 | -1.04 | 0.8767 |
| 93810_at   | 1448118_a_at | Ctsd               | cathepsin D                                                                         | 1.01  | 0.98 | -1.04 | 0.57   | -1.12 | 0.359  | -1.08 | 0.4915 | -1.2  | 0.2549 |
| 93812_at   | 1423181_s_at | Clns1a             | chloride channel, nucleotide-sensitive, 1A                                          | 1.21  | 0.48 | 1.02  | 0.75   | 1.19  | 0.0465 | 1.22  | 0.0638 | -1.18 | 0.0697 |
| 93819_at   | 1431036_a_at | 1110032D12Rik      | RIKEN cDNA 1110032D12 gene                                                          | -1.27 | 0.37 | -1.03 | 0.4868 | 1.09  | 0.142  | 1.07  | 0.2999 | -1.41 | 0.006  |
| 93820_at   | 1416971_at   | Cox7a2             | cytochrome c oxidase, subunit VIIa 2                                                | 1.08  | 0.72 | 1.14  | 0.0069 | 1.18  | 0.0911 | 1.23  | 0.0006 | 1.14  | 0.3534 |
| 93821_at   | 1448611_at   | D8Ertd594e         | DNA segment, Chr 8, ERATO Doi 594, expressed                                        | 1.48  | 0.58 | -1.17 | 0.2555 | -1.55 | 0.0292 | -1.38 | 0.046  | 1.42  | 0.0481 |
| 93822_at   | 1416218_x_at | ---                | ---                                                                                 | -1.66 | 0.01 | 1.03  | 0.7345 | -1.15 | 0.2994 | -1.09 | 0.4103 | -1.04 | 0.6506 |
| 93823_at   | 1417948_s_at | Ilf2               | interleukin enhancer binding factor 2                                               | 1.79  | 0.13 | 1.36  | 0.0167 | 1.16  | 0.1454 | 1.47  | 0.0135 | 1.1   | 0.552  |
| 93824_at   | 1455540_at   | Cps1               | carbamoyl-phosphate synthetase 1                                                    | -1.12 | 0.45 | 1     | 0.8178 | 1.06  | 0.0069 | 1.07  | 0.0031 | 1.5   | 0.0069 |
| 93826_at   | 1423911_at   | Ppp2r5a            | protein phosphatase 2, regulatory subunit B                                         | -1.09 | 0.64 | 1.05  | 0.5355 | -1.09 | 0.3934 | -1.05 | 0.4865 | 1.14  | 0.1253 |
| 93827_at   | 1449337_at   | Tdo2               | tryptophan 2,3-dioxygenase                                                          | -1.31 | 0.61 | 1.49  | 0.0126 | -1.19 | 0.1385 | 1.42  | 0.0186 | 1.7   | 0.0068 |
| 93830_at   | 1448103_s_at | Nono               | non-POU-domain-containing, octamer binding protein                                  | -1.16 | 0.42 | 1.09  | 0.0829 | -1.04 | 0.5496 | 1.05  | 0.2071 | 1.09  | 0.4091 |
| 93832_at   | 1433940_at   | Spag7              | sperm associated antigen 7                                                          | 1.41  | 0.1  | -1.08 | 0.4346 | 1     | 0.9732 | 1.07  | 0.337  | 1.08  | 0.736  |
| 93833_s_at | 1418072_at   | Hist1h2bc          | histone 1, H2bc                                                                     | -1.01 | 0.94 | -1.19 | 0.0438 | -1.24 | 0.0468 | -1.41 | 0.0011 | -1.92 | 0.0042 |
| 93835_at   | 1416109_at   | Fuca1              | fucosidase, alpha-L- 1, tissue                                                      | 2.2   | 0.03 | 1.08  | 0.3603 | -1.1  | 0.2018 | 1.09  | 0.2855 | -1.24 | 0.1747 |
| 93837_at   | 1416676_at   | Kng1               | kininogen 1                                                                         | -1.04 | 0.73 | -1.1  | 0.066  | -1.04 | 0.3985 | -1.01 | 0.8132 | 1.16  | 0.0698 |
| 93838_at   | 1428381_a_at | 2700038C09Rik      | RIKEN cDNA 2700038C09 gene                                                          | -1.17 | 0.4  | -1.23 | 0.0494 | -1.2  | 0.0127 | -1.49 | 0.0006 | -1.62 | 0.1291 |
| 93839_at   | 1418101_a_at | Rtn3               | reticulon 3                                                                         | 1.4   | 0.08 | 1.06  | 0.2441 | -1.09 | 0.0745 | 1.02  | 0.6422 | -1.05 | 0.5137 |
| 93840_at   | 1419096_at   | Apom               | apolipoprotein M                                                                    | 1.55  | 0.01 | -1.4  | 0.0001 | 1.11  | 0.2499 | -1.45 | 0.0001 | 1.74  | 0.0275 |
| 93842_at   | 1451112_s_at | Dap                | death-associated protein                                                            | 1.01  | 0.98 | -1.19 | 0.0003 | -1.14 | 0.0086 | -1.35 | 0      | -1.58 | 0.0072 |
| 93843_at   | 1415677_at   | Dhrs1              | dehydrogenase/reductase (SDR family) member                                         | -1.72 | 0    | -1.2  | 0.0268 | -1.11 | 0.1424 | -1.41 | 0.0001 | -1.68 | 0.0032 |
| 93844_at   | 1430326_s_at | 1500040F11Rik      | RIKEN cDNA 1500040F11 gene                                                          | -1.06 | 0.78 | 1.07  | 0.0698 | 1.08  | 0.0532 | 1.03  | 0.5887 | 1.12  | 0.354  |
| 93845_at   | 1423863_at   | Abcf2              | ATP-binding cassette, sub-family F (GCN20 family) member                            | 1.12  | 0.89 | -1.16 | 0.5226 | 1.87  | 0.3355 | 1.17  | 0.5539 | 1.06  | 0.802  |
| 93849_at   | 1425388_a_at | Tpk1               | thiamin pyrophosphokinase                                                           | 1.49  | 0.18 | 1.47  | 0.005  | 1.11  | 0.5266 | 1.36  | 0.0076 | -1.21 | 0.4037 |
| 93851_at   | 1426046_a_at | Rabggt2            | Rab geranylgeranyl transferase, a subunit                                           | 1.1   | 0.72 | -1.54 | 0.0013 | -1.19 | 0.1803 | -1.42 | 0.0072 | -2.24 | 0.2206 |
| 93852_at   | 1452347_at   | Mef2a              | myocyte enhancer factor 2A                                                          | 1.26  | 0.82 | 1.2   | 0.0085 | 1.12  | 0.0743 | 1.41  | 0.0009 | 2.02  | 0.0253 |
| 93853_at   | 1431734_a_at | Dnajb4             | DnaJ (Hsp40) homolog, subfamily B, member                                           | 1.59  | 0.26 | 1.28  | 0.0681 | 1.19  | 0.1186 | 1.06  | 0.6212 | 1.37  | 0.3577 |
| 93855_at   | 1450159_at   | Rem1               | rad and gem related GTP binding protein 1                                           | 2.48  | 0.09 | 1.33  | 0.0107 | 1.56  | 0.1852 | 1.15  | 0.2822 | -1.15 | 0.7647 |
| 93856_at   | 1425995_s_at | Wt1                | Wilms tumor homolog                                                                 | -1.18 | 0.27 | 1.07  | 0.5658 | 1.1   | 0.3395 | 1.19  | 0.1037 | 1.63  | 0.0577 |
| 93858_at   | 1418930_at   | Cxcl10             | chemokine (C-X-C motif) ligand 10                                                   | 1.18  | 0.08 | 3.34  | 0.1794 | -1.11 | 0.6486 | 4.43  | 0.0704 | 1.05  | 0.9195 |
| 93859_at   | 1415685_at   | Mtif2              | mitochondrial translational initiation factor 2                                     | 1.24  | 0.35 | -1.11 | 0.2905 | -1.4  | 0.0015 | -1.52 | 0.0005 | -1.34 | 0.1203 |
| 93863_f_at | 1450631_x_at | ---                | ---                                                                                 | -1.78 | 0.04 | -1.19 | 0.1872 | 1.06  | 0.6608 | -1.09 | 0.5797 | 1.33  | 0.5481 |
| 93864_s_at | 1421624_a_at | Enah               | enabled homolog (Drosophila)                                                        | -1.88 | 0.18 | -1.08 | 0.4341 | -1.08 | 0.4168 | -1.06 | 0.6142 | 1.11  | 0.7359 |
| 93865_s_at | 1449875_s_at | H2-T10 /// H2-T    | histocompatibility 2, T region locus 10 /// histocompatibility 2, T region locus 10 | -1.01 | 0.97 | 1.59  | 0.1912 | -1.19 | 0.0841 | 1.56  | 0.2026 | -1.38 | 0.0666 |
| 93866_s_at | 1448416_at   | Mglap              | matrix gamma-carboxyglutamate (gla) protein                                         | -1.24 | 0.31 | -1.62 | 0.4495 | -1.98 | 0.306  | -1.16 | 0.774  | -1.11 | 0.8807 |
| 93867_at   | 1419572_a_at | Abcd4              | ATP-binding cassette, sub-family D (ALD), member                                    | 1.17  | 0.38 | 1.04  | 0.607  | 1.07  | 0.6175 | -1.08 | 0.3305 | 1.5   | 0.3564 |
| 93869_s_at | 1419004_a_at | Bcl2a1a /// Bcl2   | B-cell leukemia/lymphoma 2 related protein                                          | 3.64  | 0.09 | 6.56  | 0.0283 | 2.03  | 0.0049 | 8.29  | 0.0448 | 4.86  | 0.0002 |
| 93870_at   | 1425693_at   | Braf               | Braf transforming gene                                                              | -1.06 | 0.85 | -1.02 | 0.9095 | 1.02  | 0.9334 | -1.01 | 0.971  | 1.26  | 0.1755 |
| 93871_at   | 1451798_at   | Il1rn              | interleukin 1 receptor antagonist                                                   | 3.49  | 0.01 | 2.43  | 0.0026 | 1.09  | 0.6804 | 2.97  | 0.0009 | 16.08 | 0.005  |
| 93872_at   | 1450440_at   | Gfra1              | glial cell line derived neurotrophic factor family class 1 member 1                 | 1.28  | 0.37 | -1.24 | 0.1405 | -1.06 | 0.7524 | -1.18 | 0.237  | -1.43 | 0.2283 |
| 93873_s_at | 1452400_a_at | Hoxa11s            | homeo box A11, opposite strand transcript                                           | 1.03  | 0.92 | 1.14  | 0.4513 | 1.09  | 0.586  | 1.13  | 0.3444 | 1.41  | 0.2108 |
| 93874_s_at | 1417505_s_at | Il11ra1 /// Il11ra | interleukin 11 receptor, alpha chain 1 /// interleukin 11 receptor, alpha chain 1   | 1.3   | 0.33 | -1.15 | 0.0043 | -1.15 | 0.0038 | -1.2  | 0.0042 | -1.18 | 0.1747 |

|            |              |               |                                                  |       |      |       |        |       |        |       |        |       |        |
|------------|--------------|---------------|--------------------------------------------------|-------|------|-------|--------|-------|--------|-------|--------|-------|--------|
| 93877_at   | 1428500_at   | 2210419D22RIK | RIKEN cDNA 2210419D22 gene                       | -1.04 | 0.86 | 1.05  | 0.6195 | -1.05 | 0.6731 | -1.01 | 0.9187 | 1.11  | 0.5322 |
| 93878_at   | 1420869_at   | Mllt10        | myeloid/lymphoid or mixed lineage-leukemia       | -1.05 | 0.9  | 1.38  | 0.0154 | 1.35  | 0.0292 | 1.41  | 0.0046 | 1.29  | 0.4708 |
| 93880_at   | 1426001_at   | Eomes         | eomesodermin homolog (Xenopus laevis)            | -1.62 | 0.58 | 1.13  | 0.3145 | 1.57  | 0.2728 | 1.41  | 0.3364 | 1.31  | 0.4867 |
| 93885_g_at | 1425582_a_at | MGI:1891716   | endomucin                                        | 1.68  | 0.28 | -1.08 | 0.81   | -1.02 | 0.9502 | -1.33 | 0.3863 | 1.05  | 0.9159 |
| 93887_at   | 1418664_at   | Mpdz          | multiple PDZ domain protein                      | 1.25  | 0.23 | 1.04  | 0.5397 | 1.48  | 0.0298 | 1.2   | 0.0462 | -1.08 | 0.6499 |
| 93888_at   | 1453501_at   | Hoxb1         | homeo box B1                                     | -1.01 | 0.98 | -1.23 | 0.0765 | -1.08 | 0.3459 | -1.19 | 0.1711 | 1.43  | 0.081  |
| 93889_f_at | 1452540_a_at | Hist1h2bc     | histone 1, H2bc                                  | 1.32  | 0.34 | -1.23 | 0.0407 | -1.3  | 0.0371 | -1.31 | 0.0049 | -1.31 | 0.0104 |
| 93891_at   | 1421312_a_at | Kifc2         | kinesin family member C2                         | -2.13 | 0.39 | -1.32 | 0.4302 | 1.19  | 0.6093 | -1.24 | 0.4899 | 1.76  | 0.0173 |
| 93893_f_at | 1425436_x_at | Klra3         | killer cell lectin-like receptor, subfamily A, m | 1.11  | 0.75 | 1.19  | 0.4708 | 1.02  | 0.9366 | 1.28  | 0.261  | 1.31  | 0.1656 |
| 93895_s_at | 1417279_at   | Itpri         | inositol 1,4,5-triphosphate receptor 1           | 1.03  | 0.93 | -1.11 | 0.208  | -1.03 | 0.7422 | -1.17 | 0.0243 | -2.22 | 0.1662 |
| 93896_at   | 1424886_at   | Ptprd         | protein tyrosine phosphatase, receptor type,     | -1.07 | 0.84 | -1.03 | 0.7622 | -1.21 | 0.0471 | -1.01 | 0.949  | 1.34  | 0.2477 |
| 93897_at   | 1425244_a_at | Theg          | testicular haploid expressed gene                | -1.23 | 0.76 | 1.01  | 0.9632 | -1.28 | 0.5416 | -1.2  | 0.6495 | -1.21 | 0.7563 |
| 93898_at   | 1419667_at   | Sgcb          | sarcoglycan, beta (dystrophin-associated gly     | -1.54 | 0.63 | -1.41 | 0.1586 | -1.39 | 0.1432 | -1.24 | 0.2299 | 1.63  | 0.3762 |
| 93901_at   | 1448408_at   | Hps1          | Hermansky-Pudlak syndrome 1 homolog (hu          | -1.16 | 0.43 | 1.01  | 0.9245 | -1.04 | 0.4153 | -1.03 | 0.6319 | 1.36  | 0.0005 |
| 93902_at   | 1448814_at   | Gab1          | growth factor receptor bound protein 2-asso      | 1.55  | 0.34 | -1.2  | 0.1626 | 1.19  | 0.1323 | 1.02  | 0.8975 | 1.59  | 0.1617 |
| 93903_at   | 1419140_at   | Acvr2b        | activin receptor IIB                             | -1.1  | 0.73 | -1.21 | 0.0181 | -1.31 | 0.0028 | -1.15 | 0.0681 | 1.45  | 0.0656 |
| 93905_at   | 1427717_at   | Cd80          | CD80 antigen                                     | 1.28  | 0.59 | -1.07 | 0.7888 | -2.16 | 0.0093 | -1.22 | 0.5492 | -1.85 | 0.2998 |
| 93906_s_at | 1451950_a_at | Cd80          | CD80 antigen                                     | -1.87 | 0.26 | -1.15 | 0.6386 | 1.23  | 0.4244 | 1.05  | 0.8725 | 1.18  | 0.3104 |
| 93910_at   | 1422711_a_at | Pnck          | pregnancy upregulated non-ubiquitously exp       | 1.59  | 0.35 | -1.05 | 0.8456 | -1.03 | 0.8912 | 1.22  | 0.3131 | 1.51  | 0.2863 |
| 93911_at   | 1421904_at   | Ncoa6ip       | nuclear receptor coactivator 6 interacting pr    | -1.02 | 0.88 | 1     | 0.9714 | 1.02  | 0.8843 | -1.04 | 0.5494 | 1.03  | 0.8193 |
| 93913_at   | 1452751_at   | Ebf3          | early B-cell factor 3                            | -1.64 | 0.35 | -1.24 | 0.3313 | 1.24  | 0.5636 | -1.03 | 0.8714 | 1.05  | 0.8334 |
| 93914_at   | 1448950_at   | Il1r1         | interleukin 1 receptor, type I                   | -1.04 | 0.84 | 1.16  | 0.2377 | 1.31  | 0.1243 | 1.56  | 0.0044 | -1.22 | 0.2347 |
| 93915_at   | 1416957_at   | Pou2af1       | POU domain, class 2, associating factor 1        | -1.02 | 0.92 | 1.06  | 0.665  | -1.18 | 0.2883 | 1.17  | 0.2273 | 1.6   | 0.0541 |
| 93917_at   | 1452440_at   | Tnfrsf12      | tumor necrosis factor (ligand) superfamily, m    | -1.18 | 0.45 | -1.11 | 0.1803 | 1.02  | 0.7736 | -1.04 | 0.5577 | 1.14  | 0.254  |
| 93919_at   | 1450078_at   | Nrk           | Nik related kinase                               | -1.49 | 0.34 | 1.12  | 0.3408 | 1.03  | 0.7831 | 1.03  | 0.8083 | -1.25 | 0.4879 |
| 93923_at   | 1435019_at   | Atxn7l3       | ataxin 7-like 3                                  | -1.47 | 0.14 | 1.08  | 0.3322 | 1.12  | 0.1838 | 1.01  | 0.8933 | 1.03  | 0.698  |
| 93924_f_at | 1448296_x_at | ---           | ---                                              | 1.34  | 0.38 | -1.18 | 0.1087 | 1.08  | 0.5399 | -1.12 | 0.3745 | 1.15  | 0.4898 |
| 93926_at   | 1421382_at   | Prlr          | prolactin receptor                               | -2.37 | 0.02 | -3.09 | 0      | -1.29 | 0.0245 | -5.55 | 0      | -2.83 | 0.0001 |
| 93929_s_at | 1427760_s_at | Plf           | proliferin                                       | -2.95 | 0.09 | -1.02 | 0.945  | 1.63  | 0.0625 | 1.56  | 0.0577 | -1.02 | 0.9524 |
| 93930_at   | 1448207_at   | Lasp1         | LIM and SH3 protein 1                            | -1.56 | 0.45 | -1.12 | 0.2291 | -1.44 | 0.0172 | -1.6  | 0.0076 | -1.81 | 0.454  |
| 93932_at   | 1450335_at   | ---           | ---                                              | -1.32 | 0.03 | 1.04  | 0.7901 | 1.15  | 0.2618 | 1.07  | 0.6915 | 2.18  | 0.3373 |
| 93933_at   | 1425631_at   | Ppp1r3c       | protein phosphatase 1, regulatory (inhibitor)    | -1.23 | 0.78 | 1.36  | 0.0407 | -1.18 | 0.3566 | 1.05  | 0.6363 | -1.07 | 0.9033 |
| 93934_at   | 1417232_at   | Cldn2         | claudin 2                                        | -1.67 | 0.05 | -1.66 | 0.063  | -2.13 | 0.0423 | -4.78 | 0.0009 | -1.71 | 0.1965 |
| 93937_at   | 1418361_at   | Gas8          | growth arrest specific 8                         | 1.35  | 0.56 | 1.06  | 0.7547 | 1.29  | 0.1115 | 1.16  | 0.4308 | 1.28  | 0.1316 |
| 93939_at   | 1450183_a_at | Lnk           | linker of T-cell receptor pathways               | 1.3   | 0.11 | -1.02 | 0.8085 | -1.15 | 0.0935 | -1.09 | 0.2246 | -1.02 | 0.9385 |
| 93940_at   | 1419298_at   | Pon3          | paraoxonase 3                                    | 1.43  | 0.16 | 1.17  | 0.0675 | 1.07  | 0.3927 | 1.17  | 0.0594 | 1.08  | 0.4812 |
| 93941_at   | 1419304_at   | T             | brachyury                                        | -1.15 | 0.6  | 1.01  | 0.9526 | 1.24  | 0.2992 | 1.23  | 0.159  | 1.33  | 0.1073 |
| 93942_at   | 1418045_at   | Inpp1         | inositol polyphosphate-1-phosphatase             | -1.86 | 0.46 | -1.08 | 0.3732 | 1.01  | 0.869  | 1.09  | 0.7607 | 1.2   | 0.408  |
| 93944_r_at | 1451034_at   | Zfp36l2       | zinc finger protein 36, C3H type-like 2          | 1.67  | 0.11 | 1.06  | 0.6008 | 1.07  | 0.5986 | -1.03 | 0.8066 | 1.52  | 0.0305 |
| 93945_at   | 1421244_at   | Esr1          | estrogen receptor 1 (alpha)                      | -1.61 | 0.09 | -2.28 | 0.0342 | -1.99 | 0.0587 | -2.18 | 0.0395 | -1.02 | 0.9498 |
| 93950_at   | 1422833_at   | Foxa2         | forkhead box A2                                  | 1.13  | 0.58 | -1.44 | 0.0005 | -1.46 | 0.0119 | -1.81 | 0      | -1.19 | 0.3563 |
| 93951_at   | 1419159_at   | Golga3        | golgi autoantigen, golgin subfamily a, 3         | 1.57  | 0.23 | -1.01 | 0.9139 | 1.19  | 0.0467 | 1.06  | 0.385  | 1.17  | 0.7881 |
| 93953_at   | 1420388_at   | Prss12        | protease, serine, 12 neurotrypsin (motopsin)     | -2.2  | 0.28 | -1.2  | 0.464  | -1.08 | 0.7803 | -1.28 | 0.3575 | 1.57  | 0.0932 |
| 93954_at   | 1420872_at   | Gucy1b3       | guanylate cyclase 1, soluble, beta 3             | -1.34 | 0.37 | 1.06  | 0.6967 | 1.21  | 0.2726 | 1.2   | 0.2646 | 1.78  | 0.1117 |
| 93955_at   | 1450751_at   | Zbp1          | zona pellucida binding protein                   | 1.12  | 0.79 | 1.06  | 0.8614 | -1.28 | 0.3898 | -1.09 | 0.7918 | 2.73  | 0.2623 |
| 93956_at   | 1449025_at   | Irf3          | interferon-induced protein with tetratricopept   | 1.23  | 0.37 | -1.11 | 0.748  | -1.93 | 0.0253 | 1.17  | 0.6774 | 1.11  | 0.8098 |
| 93957_at   | 1422921_at   | Vpreb3        | pre-B lymphocyte gene 3                          | 1.12  | 0.78 | 1.51  | 0.2289 | 1.41  | 0.303  | 1.13  | 0.724  | 2.19  | 0.0347 |
| 93958_at   | 1425929_a_at | Rnf14         | ring finger protein 14                           | 1.32  | 0.33 | 1.12  | 0.1596 | 1.07  | 0.5843 | 1.26  | 0.0083 | 1.61  | 0.0666 |
| 93961_at   | 1449216_at   | Igae          | integrin, alpha E, epithelial-associated         | -1.13 | 0.64 | 1.64  | 0.0693 | -1.11 | 0.7341 | 1.64  | 0.1064 | -1.56 | 0.0098 |
| 93962_at   | 1448020_at   | Rap1a         | RAS-related protein-1a                           | 1.45  | 0.19 | -1.04 | 0.687  | -1.21 | 0.1945 | -1.15 | 0.1758 | 1.29  | 0.1035 |
| 93963_at   | 1436212_at   | Al661017      | expressed sequence Al661017                      | -1.07 | 0.83 | 1.33  | 0.3354 | 1.21  | 0.4801 | 2.01  | 0.0181 | -1.02 | 0.9647 |
| 93965_r_at | 1424598_at   | Ddx6          | DEAD (Asp-Glu-Ala-Asp) box polypeptide 6         | -1.71 | 0.04 | 1.03  | 0.843  | -1.38 | 0.0893 | -1.22 | 0.285  | -1.34 | 0.423  |
| 93966_at   | 1448410_at   | Ube4b         | ubiquitination factor E4B, UFD2 homolog (S       | -1.06 | 0.79 | -1.01 | 0.9625 | 1.03  | 0.6989 | 1.25  | 0.0391 | 1.19  | 0.401  |

|            |              |               |                                                  |       |      |       |        |       |        |       |        |       |        |
|------------|--------------|---------------|--------------------------------------------------|-------|------|-------|--------|-------|--------|-------|--------|-------|--------|
| 93967_at   | 1417326_a_at | Anapc11       | anaphase promoting complex subunit 11 ho         | 1.16  | 0.55 | 1.01  | 0.9119 | -1.27 | 0.0038 | -1.07 | 0.4998 | 1.34  | 0.146  |
| 93968_at   | 1450638_at   | Pdcd5         | programmed cell death 5                          | 1.18  | 0.38 | 1     | 0.9863 | 1.1   | 0.2047 | 1     | 0.9941 | 1.07  | 0.6744 |
| 93972_at   | 1451096_at   | Ndufs2        | NADH dehydrogenase (ubiquinone) Fe-S pr          | 1.94  | 0.12 | -1.02 | 0.8207 | 1.05  | 0.5255 | 1.05  | 0.646  | -1.13 | 0.6239 |
| 93973_at   | 1426674_at   | Eif3s9        | eukaryotic translation initiation factor 3, subu | 1.01  | 0.94 | -1.16 | 0.0187 | -1.08 | 0.4273 | -1.12 | 0.0058 | -1.1  | 0.3442 |
| 93974_at   | 1419816_s_at | 1300002F13Rik | RIKEN cDNA 1300002F13 gene                       | -1.81 | 0.49 | -2.35 | 0      | -1.15 | 0.353  | -1.43 | 0.0046 | -4.4  | 0.0198 |
| 93975_at   | 1416129_at   | 1300002F13Rik | RIKEN cDNA 1300002F13 gene                       | -1.94 | 0.18 | -2.08 | 0      | -1.07 | 0.4062 | -1.3  | 0.0023 | -2.69 | 0.01   |
| 93976_at   | 1418433_at   | Cab39         | calcium binding protein 39                       | 1.14  | 0.73 | 1.2   | 0.0569 | 1.19  | 0.0522 | 1.21  | 0.039  | 1.12  | 0.3071 |
| 93978_at   | 1454842_a_at | B3galnt2      | UDP-GalNAc:betaGlcNAc beta 1,3-galactos          | -1.05 | 0.9  | 1.01  | 0.9538 | 1.03  | 0.862  | -1.06 | 0.6233 | -2.04 | 0.0987 |
| 93980_at   | 1426426_at   | Rbm13         | RNA binding motif protein 13                     | 1.3   | 0.47 | 1.27  | 0.143  | 1.18  | 0.4331 | 1.28  | 0.0697 | -1.21 | 0.4485 |
| 93981_at   | 1415806_at   | ---           | ---                                              | 1.08  | 0.87 | 1.28  | 0.3421 | -1.01 | 0.9624 | 1.22  | 0.5069 | -1.28 | 0.4931 |
| 93982_at   | 1415693_at   | Der1          | Der1-like domain family, member 1                | 1     | 0.99 | -1.02 | 0.7437 | 1.07  | 0.2838 | -1.01 | 0.807  | 1.05  | 0.463  |
| 93983_at   | 1433563_s_at | Der1          | Der1-like domain family, member 1                | -1.17 | 0.35 | 1.07  | 0.0978 | 1.16  | 0.0534 | 1.06  | 0.2879 | 1.08  | 0.4022 |
| 93984_at   | 1448770_a_at | Atpif1        | ATPase inhibitory factor 1                       | 1.76  | 0.09 | 1.08  | 0.4108 | -1.12 | 0.08   | -1    | 0.9875 | 1.42  | 0.0013 |
| 93985_at   | 1426721_s_at | Tiparp        | TCDD-inducible poly(ADP-ribose) polymera:        | -1    | 1    | 1.48  | 0.2075 | 1.75  | 0.2353 | 1.94  | 0.0108 | 1.33  | 0.436  |
| 93986_at   | 1428213_at   | 2410003A14Rik | RIKEN cDNA 2410003A14 gene                       | 2.31  | 0.02 | 1.18  | 0.0214 | 1.22  | 0.0984 | 1.21  | 0.0329 | -1.07 | 0.6044 |
| 93987_f_at | 1417126_a_at | 3110001N18Rik | RIKEN cDNA 3110001N18 gene                       | 1.04  | 0.75 | 1.14  | 0.2368 | 1.39  | 0.0137 | 1.33  | 0.0021 | -1.08 | 0.7187 |
| 93988_at   | 1423568_at   | PsmA7         | proteasome (prosome, macropain) subunit, ;       | 1.39  | 0.12 | 1.19  | 0.0128 | 1.06  | 0.1728 | 1.2   | 0.0029 | -1.07 | 0.4627 |
| 93990_at   | 1415872_at   | Hnrph1        | heterogeneous nuclear ribonucleoprotein H1       | 1.13  | 0.63 | 1.05  | 0.4274 | 1.24  | 0.0124 | 1.15  | 0.0524 | 1.08  | 0.3724 |
| 93991_at   | 1416478_a_at | Mdh2          | malate dehydrogenase 2, NAD (mitochondri         | 1.38  | 0.08 | 1.32  | 0      | 1.44  | 0.0002 | 1.56  | 0      | 1.14  | 0.3066 |
| 93992_at   | 1424073_at   | 5430437P03Rik | RIKEN cDNA 5430437P03 gene                       | 1.11  | 0.47 | 1.03  | 0.4776 | 1.07  | 0.3653 | 1.03  | 0.5928 | -1.13 | 0.2492 |
| 93994_at   | 1435446_a_at | Chpt1         | choline phosphotransferase 1                     | 1.24  | 0.27 | 2.38  | 0      | 1.24  | 0.036  | 2.41  | 0      | -1.33 | 0.0315 |
| 93996_at   | 1415994_at   | Cyp2e1        | cytochrome P450, family 2, subfamily e, pol      | -1.23 | 0.37 | 1.04  | 0.0671 | 1.03  | 0.2383 | 1.03  | 0.2604 | 1.54  | 0.0168 |
| 93997_at   | 1418116_at   | MGI:1929890   | interferon alpha responsive gene                 | -1.01 | 0.9  | -1.15 | 0.0094 | -1.06 | 0.5775 | -1.16 | 0.0076 | -1.26 | 0.068  |
| 93999_at   | 1448357_at   | Snrpg         | small nuclear ribonucleoprotein polypeptide      | 1.01  | 0.93 | 1.05  | 0.2786 | 1.08  | 0.3852 | 1.04  | 0.3894 | 1.21  | 0.2294 |
| 94000_at   | 1448569_at   | Cd8b1         | CD8 antigen, beta chain 1                        | -1.29 | 0.64 | -1.21 | 0.076  | -1.31 | 0.0038 | -1.31 | 0.0029 | -1.15 | 0.2984 |
| 94001_at   | 1448151_at   | Elavl1        | ELAV (embryonic lethal, abnormal vision, Dr      | -1.03 | 0.9  | 1.01  | 0.8413 | 1.15  | 0.1179 | 1.06  | 0.3044 | -1.21 | 0.1099 |
| 94002_at   | 1448174_at   | Cul1          | cullin 1                                         | 1.17  | 0.43 | 1.19  | 0      | 1.18  | 0.0006 | 1.25  | 0      | 1.02  | 0.7575 |
| 94003_at   | 1433676_at   | Prkwnk1       | protein kinase, lysine deficient 1               | 1.18  | 0.18 | -1.04 | 0.4213 | 1.04  | 0.6212 | -1.01 | 0.9171 | 1.12  | 0.2223 |
| 94004_at   | 1450981_at   | Cnn2          | calponin 2                                       | 1.48  | 0.08 | 1.53  | 0.0046 | 1.12  | 0.4078 | 1.44  | 0.0545 | 1.38  | 0.0926 |
| 94005_at   | 1433729_x_at | Pmpcb         | peptidase (mitochondrial processing) beta        | 1.5   | 0.14 | 1.36  | 0.0157 | 1.22  | 0.1251 | 1.48  | 0.0002 | -1.01 | 0.9363 |
| 94007_at   | 1456142_x_at | Morf4l1       | mortality factor 4 like 1                        | -1.14 | 0.56 | 1.09  | 0.2732 | 1.05  | 0.3364 | 1.24  | 0.0283 | -1.02 | 0.8796 |
| 94008_at   | 1427914_a_at | Tceb1         | transcription elongation factor B (SIII), polyp  | -1.08 | 0.48 | 1.04  | 0.5505 | 1.09  | 0.5136 | 1.04  | 0.4842 | 1.01  | 0.967  |
| 94009_at   | 1427915_s_at | Tceb1         | transcription elongation factor B (SIII), polyp  | 1.24  | 0.65 | 1.11  | 0.2479 | -1.02 | 0.8467 | 1.08  | 0.3559 | -1.78 | 0.0241 |
| 94011_at   | 1415739_at   | 3100004P22Rik | RIKEN cDNA 3100004P22 gene                       | 1.44  | 0.03 | -1.17 | 0.0024 | -1.14 | 0.0821 | -1.07 | 0.1402 | -1.11 | 0.3015 |
| 94012_at   | 1417499_at   | Timm13a       | translocase of inner mitochondrial membran       | 1.51  | 0.25 | 1.15  | 0.0859 | 1.25  | 0.0393 | 1.26  | 0.0441 | 1.28  | 0.4086 |
| 94014_at   | 1416979_at   | 2510048O06Rik | RIKEN cDNA 2510048O06 gene                       | 1.3   | 0.3  | -1.12 | 0.285  | -1.11 | 0.4002 | -1    | 0.9654 | -1.37 | 0.0266 |
| 94015_at   | 1416198_at   | Th1l          | TH1-like homolog (Drosophila)                    | 1.35  | 0.47 | -1.01 | 0.8688 | 1.09  | 0.128  | -1    | 0.9468 | -1.52 | 0.045  |
| 94019_at   | 1423039_a_at | Bzw1          | basic leucine zipper and W2 domains 1            | -1.1  | 0.56 | -1.03 | 0.6388 | 1.02  | 0.8891 | -1.01 | 0.884  | -1.55 | 0.002  |
| 94020_at   | 1431292_a_at | Ptk9l         | protein tyrosine kinase 9-like (A6-related prc   | 1.4   | 0.5  | 1.45  | 0.3041 | -1.14 | 0.553  | 1.81  | 0.1939 | -1.05 | 0.9454 |
| 94021_at   | 1419630_a_at | Trim11        | tripartite motif protein 11                      | 1.51  | 0.02 | -1.11 | 0.1459 | -1.07 | 0.1526 | 1.05  | 0.4484 | 1.14  | 0.0561 |
| 94022_at   | 1452409_at   | Gltscr2       | glioma tumor suppressor candidate region g       | 1.18  | 0.14 | 1.1   | 0.2855 | 1.03  | 0.7653 | 1.03  | 0.7418 | 1.35  | 0.083  |
| 94024_at   | 1424144_at   | Ris2          | retroviral integration site 2                    | 1.09  | 0.71 | 1.04  | 0.6351 | 1.02  | 0.8381 | -1    | 0.9647 | 1.39  | 0.0267 |
| 94025_at   | 1460198_a_at | Psmb3         | proteasome (prosome, macropain) subunit, l       | -1.14 | 0.69 | 1.09  | 0.0241 | 1.11  | 0.1928 | 1.15  | 0.0043 | 1.06  | 0.5858 |
| 94026_at   | 1433800_a_at | Pomc1         | pro-opiomelanocortin-alpha                       | -1.42 | 0.29 | -2.32 | 0.0106 | -2.41 | 0.0071 | -1.77 | 0.0644 | 1.59  | 0.1825 |
| 94027_at   | 1434615_x_at | ---           | Transcribed locus, weakly similar to XP_484      | 1.17  | 0.64 | -1.2  | 0.347  | -1.29 | 0.158  | -1.14 | 0.6424 | 1.13  | 0.8141 |
| 94030_at   | 1433594_at   | Commmd2       | COMM domain containing 2                         | 1.58  | 0.21 | 1.02  | 0.7476 | 1.17  | 0.0302 | 1.02  | 0.7623 | -1.23 | 0.3111 |
| 94031_at   | 1419945_s_at | Rab2          | RAB2, member RAS oncogene family                 | 1.21  | 0.5  | -1.12 | 0.1968 | -1.14 | 0.1718 | -1.06 | 0.4576 | -1.32 | 0.0657 |
| 94032_at   | 1415727_at   | Apoa1bp       | apolipoprotein A-I binding protein               | 1.33  | 0.03 | 1.12  | 0.0727 | -1.01 | 0.7973 | 1.03  | 0.5873 | 1.39  | 0.0002 |
| 94034_at   | 1451259_at   | Smfn          | small fragment nuclease                          | 1.13  | 0.72 | -1.14 | 0.0841 | -1.12 | 0.0383 | -1.21 | 0      | -2.75 | 0.0061 |
| 94036_at   | 1416511_a_at | Cdc42ep4      | CDC42 effector protein (Rho GTPase bindin        | -1.1  | 0.65 | 1.18  | 0.0793 | 1.31  | 0.0025 | 1.23  | 0.0347 | 1.01  | 0.9361 |
| 94037_at   | 1448281_a_at | Ela2          | elastase 2                                       | -1.18 | 0.28 | -1.14 | 0.0528 | -1.02 | 0.7252 | -1.02 | 0.8703 | 1.04  | 0.7021 |
| 94038_at   | 1448238_at   | 2700060E02Rik | RIKEN cDNA 2700060E02 gene                       | 1.49  | 0.21 | 1.09  | 0.2002 | 1.09  | 0.3781 | 1.14  | 0.0194 | -1.07 | 0.5767 |
| 94040_at   | 1430536_a_at | Erh           | enhancer of rudimentary homolog (Drosophi        | -1.48 | 0.36 | -1    | 0.9747 | -1.09 | 0.1201 | 1.02  | 0.7861 | -1.39 | 0.0598 |



|            |              |               |                                                |       |      |       |        |       |        |       |        |       |        |
|------------|--------------|---------------|------------------------------------------------|-------|------|-------|--------|-------|--------|-------|--------|-------|--------|
| 94041_at   | 1423684_at   | Hnrpk         | heterogeneous nuclear ribonucleoprotein K      | 1.47  | 0.03 | 1.18  | 0.0856 | 1.2   | 0.1494 | 1.27  | 0.0054 | -1.07 | 0.4374 |
| 94042_f_at | 1436946_s_at | Gng5          | guanine nucleotide binding protein (G protei   | -1.1  | 0.01 | -1.06 | 0.3819 | -1.08 | 0.3243 | -1.08 | 0.2193 | -1.02 | 0.889  |
| 94043_at   | 1449622_s_at | Atp6ap1       | ATPase, H+ transporting, lysosomal access      | 1.13  | 0.47 | 1.15  | 0.0094 | 1.05  | 0.3575 | 1.1   | 0.117  | 1.04  | 0.764  |
| 94044_at   | 1420021_s_at | Suz12         | suppressor of zeste 12 homolog (Drosophila     | 1.51  | 0.33 | 1.02  | 0.8884 | 1     | 0.998  | 1.07  | 0.4467 | -1.12 | 0.4365 |
| 94045_at   | 1416649_at   | Ambp          | alpha 1 microglobulin/bikunin                  | 1     | 0.97 | 1.06  | 0.0439 | 1.08  | 0.0028 | 1.09  | 0.0005 | 1     | 0.9306 |
| 94046_at   | 1423518_at   | Csk           | c-src tyrosine kinase                          | -1.53 | 0.01 | 1.01  | 0.8503 | -1.07 | 0.3996 | 1.16  | 0.1839 | 1.01  | 0.9588 |
| 94047_at   | 1416830_at   | 0610031J06Rik | RIKEN cDNA 0610031J06 gene                     | -1.1  | 0.21 | -1.04 | 0.3983 | 1.03  | 0.673  | -1.07 | 0.1647 | -1.19 | 0.0565 |
| 94048_at   | 1434879_at   | Cdc34         | cell division cycle 34 homolog (S. cerevisiae  | -1.03 | 0.82 | -1.16 | 0.0441 | 1.06  | 0.5014 | -1.19 | 0.0278 | -1.69 | 0.0048 |
| 94049_at   | 1450624_at   | Bhmt          | betaine-homocysteine methyltransferase         | 1.56  | 0.04 | 1.08  | 0.1553 | -1.35 | 0.0083 | 1.08  | 0.2566 | -1.24 | 0.1958 |
| 94051_at   | 1453095_at   | Rab10         | RAB10, member RAS oncogene family              | -2.45 | 0.13 | -1.45 | 0.2252 | -1.83 | 0.0179 | -1.63 | 0.0744 | 3.31  | 0.0637 |
| 94052_at   | 1415675_at   | Dpm2          | dolichol-phosphate (beta-D) mannosyltransf     | -1.09 | 0.49 | 1.06  | 0.3149 | -1.05 | 0.44   | 1.03  | 0.5113 | 1.04  | 0.7054 |
| 94054_at   | 1433908_a_at | Cttn          | cortactin                                      | -1.1  | 0.31 | -1.05 | 0.5775 | 1.06  | 0.499  | -1.05 | 0.5504 | 1.15  | 0.516  |
| 94055_at   | 1421313_s_at | Cttn          | cortactin                                      | 2.34  | 0.13 | -1.3  | 0.1543 | 1.03  | 0.8919 | -1.06 | 0.6661 | -2.07 | 0.474  |
| 94057_g_at | 1415964_at   | Scd1          | stearoyl-Coenzyme A desaturase 1               | -1.35 | 0.13 | -1.13 | 0.2244 | -1.47 | 0.0178 | -1.38 | 0.03   | -2.91 | 0.0003 |
| 94059_at   | 1423864_at   | Nrbp          | nuclear receptor binding protein               | -1.02 | 0.9  | 1.02  | 0.6541 | 1.03  | 0.6427 | 1     | 0.9787 | 1.14  | 0.0996 |
| 94060_at   | 1423694_at   | Kctd10        | potassium channel tetramerisation domain c     | 1.49  | 0.06 | 1.08  | 0.3383 | -1.01 | 0.88   | 1.08  | 0.4266 | 1.11  | 0.3987 |
| 94061_at   | 1416326_at   | Crip1         | cysteine-rich protein 1 (intestinal)           | 2.76  | 0.28 | 1.28  | 0.4714 | -1.38 | 0.2912 | 1.52  | 0.1417 | 2.36  | 0.1902 |
| 94062_at   | 1452692_a_at | Ndufv2        | NADH dehydrogenase (ubiquinone) flavoprc       | 1.57  | 0.05 | 1.27  | 0      | 1.16  | 0.0115 | 1.34  | 0.0001 | -1.18 | 0.1249 |
| 94063_at   | 1448110_at   | Sema4a        | sema domain, immunoglobulin domain (Ig),       | -1.11 | 0.66 | -1.24 | 0.0017 | -1.2  | 0.0225 | -1.4  | 0.0002 | -1.18 | 0.2916 |
| 94064_at   | 1426326_at   | Zfp91         | zinc finger protein 91                         | 1.09  | 0.77 | 1.1   | 0.3446 | 1.03  | 0.8209 | -1.08 | 0.5032 | -1.05 | 0.797  |
| 94065_at   | 1460176_at   | Crk           | v-crk sarcoma virus CT10 oncogene homolc       | -1.25 | 0.55 | -1.31 | 0.1119 | -1.01 | 0.9416 | -1.68 | 0.0074 | -1.25 | 0.7051 |
| 94066_at   | 1422429_at   | Rnf14         | ring finger protein 14                         | 1     | 0.99 | 1.09  | 0.0545 | 1.18  | 0.0036 | 1.26  | 0.0003 | 1.36  | 0.002  |
| 94067_at   | 1424080_at   | Dcps          | decapping enzyme, scavenger                    | 1.05  | 0.83 | -1.4  | 0.0029 | -1.22 | 0.0561 | -1.45 | 0.0037 | 1.19  | 0.1522 |
| 94068_at   | 1460442_at   | Rps19         | ribosomal protein S19                          | 1.92  | 0.12 | 1.23  | 0.1273 | 1.32  | 0.0391 | 1.51  | 0.0061 | 1.14  | 0.334  |
| 94071_at   | 1419371_s_at | Gosr2         | golgi SNAP receptor complex member 2           | 1.07  | 0.78 | -1.09 | 0.1531 | -1.02 | 0.6616 | -1.07 | 0.0444 | -1.35 | 0.0079 |
| 94073_at   | 1416270_at   | Polr2g        | polymerase (RNA) II (DNA directed) polypep     | 1.43  | 0.32 | 1.23  | 0.0834 | 1.12  | 0.3513 | 1.3   | 0.0231 | -1.01 | 0.9389 |
| 94075_at   | 1448764_a_at | Fabp1         | fatty acid binding protein 1, liver            | -1.28 | 0.29 | -1.01 | 0.8649 | 1.01  | 0.8983 | -1.04 | 0.4969 | -1.71 | 0.0019 |
| 94077_f_at | 1418896_a_at | Rpn2          | ribophorin II                                  | -1.11 | 0.38 | -1.16 | 0.0086 | -1.03 | 0.6753 | -1.1  | 0.0294 | -1.07 | 0.7517 |
| 94078_at   | 1434341_x_at | ---           | ---                                            | 1.36  | 0.07 | 1.16  | 0.0159 | 1.24  | 0.0037 | 1.33  | 0.0011 | 1.11  | 0.4539 |
| 94079_at   | 1448729_a_at | 4-Sep         | septin 4                                       | 1.27  | 0.2  | 1.09  | 0.3586 | 1.14  | 0.3216 | 1.12  | 0.2957 | -1.33 | 0.2477 |
| 94081_at   | 1452691_at   | Rbm17         | RNA binding motif protein 17                   | 1.54  | 0.02 | 1.2   | 0.0888 | 1.24  | 0.0392 | 1.37  | 0.0001 | 1.59  | 0.0158 |
| 94084_at   | 1423987_at   | Cdc26         | cell division cycle 26                         | 1.32  | 0.15 | 1.01  | 0.8923 | 1.09  | 0.3125 | 1.02  | 0.8143 | -1.04 | 0.6809 |
| 94086_at   | 1450566_at   | Il3           | interleukin 3                                  | 1.57  | 0.27 | -1.36 | 0.2664 | 1.05  | 0.8709 | -1.36 | 0.2932 | 1.63  | 0.1013 |
| 94088_at   | 1423470_at   | Ptbp2         | polypyrimidine tract binding protein 2         | -1.1  | 0.79 | 1.32  | 0.0974 | 1.08  | 0.5166 | 1.35  | 0.0254 | -1.32 | 0.4286 |
| 94089_at   | 1444160_at   | Pkd1l3        | Polycystic kidney disease 1 like 3             | 1.11  | 0.8  | 1.01  | 0.9147 | 1.4   | 0.0844 | 1.04  | 0.8253 | 1.39  | 0.3153 |
| 94095_at   | 1420068_at   | Hat1          | Histone aminotransferase 1                     | -2.2  | 0.08 | -1.2  | 0.1557 | 1.04  | 0.7952 | -1.14 | 0.2833 | 1.27  | 0.3479 |
| 94097_at   | 1449058_at   | Gli1          | GLI-Kruppel family member GLI1                 | -2.47 | 0.22 | 1.22  | 0.1706 | 1.08  | 0.6507 | 1.1   | 0.3684 | -1.09 | 0.7633 |
| 94098_at   | 1420471_at   | Hcrt          | hypocretin                                     | -1.49 | 0.35 | -1.15 | 0.7153 | -1.03 | 0.9388 | 1.07  | 0.8372 | 1.05  | 0.8891 |
| 94099_at   | 1449960_at   | Nptx2         | neuronal pentraxin 2                           | -1.36 | 0.09 | 1.02  | 0.8367 | -1.03 | 0.7854 | -1.01 | 0.8856 | 1.39  | 0.1083 |
| 94100_s_at | 1451033_a_at | Trpc4         | transient receptor potential cation channel, s | -2.74 | 0.17 | 1.42  | 0.0796 | 1.11  | 0.6862 | -1.03 | 0.8807 | 2.07  | 0.1371 |
| 94101_at   | 1420738_at   | Zfp98         | zinc finger protein 98                         | 1.71  | 0.23 | -1.98 | 0.0179 | -1.64 | 0.1288 | -2.12 | 0.0091 | 1.17  | 0.5186 |
| 94102_at   | 1422152_at   | Hmx1          | H6 homeo box 1                                 | 1.15  | 0.68 | 1.12  | 0.3466 | -1    | 0.979  | -1.01 | 0.8932 | -1.66 | 0.2528 |
| 94104_at   | 1450254_at   | Tert          | telomerase reverse transcriptase               | -1.05 | 0.89 | -1.19 | 0.0499 | -1.07 | 0.5003 | -1.16 | 0.0613 | 1.31  | 0.2037 |
| 94105_at   | 1460708_s_at | Cdc42         | cell division cycle 42 homolog (S. cerevisiae  | 1.12  | 0.65 | 1.11  | 0.0423 | 1.09  | 0.1051 | 1.21  | 0.0064 | -1.26 | 0.1599 |
| 94106_at   | 1457272_at   | ---           | Transcribed locus                              | 1.05  | 0.54 | 1.05  | 0.2238 | 1.26  | 0.0008 | 1.09  | 0.0878 | 1.28  | 0.0895 |
| 94107_at   | 1421056_at   | Dnase1l3      | deoxyribonuclease 1-like 3                     | 1.37  | 0.4  | -1.13 | 0.7577 | 1.11  | 0.7555 | 1.17  | 0.619  | -1.12 | 0.7934 |
| 94108_at   | 1421704_a_at | Pik3c2g       | phosphatidylinositol 3-kinase, C2 domain co    | 1.43  | 0.1  | -1.04 | 0.6581 | 1.01  | 0.9081 | -1.04 | 0.6122 | -1.26 | 0.1276 |
| 94109_at   | 1426377_at   | Zfp281        | zinc finger protein 281                        | 1.1   | 0.39 | 1.33  | 0.0557 | 1.16  | 0.2325 | 1.15  | 0.3362 | 1.32  | 0.0801 |
| 94112_at   | 1420412_at   | Tnfsf10       | tumor necrosis factor (ligand) superfamily, m  | -1.17 | 0.79 | 1.12  | 0.6853 | 1.11  | 0.5982 | 1.21  | 0.3409 | 1.17  | 0.2684 |
| 94113_at   | 1459920_at   | ---           | Transcribed locus                              | -1.41 | 0.55 | 1     | 0.9917 | -1.47 | 0.1286 | 1.12  | 0.498  | 1.09  | 0.8883 |
| 94115_at   | 1419008_at   | Npy5r         | neuropeptide Y receptor Y5                     | -1.07 | 0.69 | -1.06 | 0.7032 | -1.06 | 0.6736 | -1.01 | 0.9052 | 1.21  | 0.6293 |
| 94116_at   | 1422265_at   | Brs3          | bombesin-like receptor 3                       | 1.91  | 0.39 | -1.49 | 0.1625 | -1.19 | 0.5386 | -1.96 | 0.0391 | 1.49  | 0.407  |
| 94119_at   | 1450228_a_at | Pip5k1c       | phosphatidylinositol-4-phosphate 5-kinase, t   | -1.06 | 0.69 | 1.05  | 0.6271 | -1.07 | 0.3722 | -1.05 | 0.6059 | 1.17  | 0.2633 |

|            |              |                 |                                                  |       |      |       |        |       |        |       |        |       |        |
|------------|--------------|-----------------|--------------------------------------------------|-------|------|-------|--------|-------|--------|-------|--------|-------|--------|
| 94120_s_at | 1449833_at   | Sprr2f          | small proline-rich protein 2F                    | -2    | 0.07 | 1.08  | 0.7081 | 1.06  | 0.7922 | 1.13  | 0.564  | 1.72  | 0.1079 |
| 94121_at   | 1422240_s_at | Sprr2h          | small proline-rich protein 2H                    | -1.48 | 0.59 | 1.09  | 0.678  | -1.09 | 0.6975 | -1.05 | 0.8028 | 1.61  | 0.3607 |
| 94122_at   | 1450468_at   | ---             | ---                                              | -1.59 | 0.16 | 1.14  | 0.322  | 1.42  | 0.0438 | 1.14  | 0.3272 | 2.84  | 0.0367 |
| 94123_at   | 1418054_at   | Neurod4         | neurogenic differentiation 4                     | -2.13 | 0.44 | -1.74 | 0.2165 | -1.49 | 0.3601 | -1.73 | 0.2214 | -1.02 | 0.9655 |
| 94124_at   | 1418597_at   | Top3a           | topoisomerase (DNA) III alpha                    | 1.1   | 0.4  | 1.06  | 0.423  | -1.03 | 0.7602 | 1.04  | 0.7201 | 1.28  | 0.4074 |
| 94125_at   | 1416237_at   | Eva1            | epithelial V-like antigen 1                      | 1.28  | 0.53 | -1.23 | 0.2738 | -1.2  | 0.1939 | -1.23 | 0.1034 | -1.57 | 0.0832 |
| 94126_at   | 1421465_at   | Wnt2b           | wingless related MMTV integration site 2b        | 1.04  | 0.9  | 1.38  | 0.0571 | 1.61  | 0.0089 | 1.59  | 0.0172 | 2.94  | 0.0014 |
| 94127_at   | 1427564_at   | Diap2           | diaphanous homolog 2 (Drosophila)                | -1.42 | 0.25 | -1.06 | 0.7026 | -1.3  | 0.1433 | -1.53 | 0.0255 | 1.22  | 0.3178 |
| 94128_at   | 1420594_at   | Bard1           | BRCA1 associated RING domain 1                   | -3.11 | 0.01 | -1.29 | 0.3593 | 1.08  | 0.8035 | -1.21 | 0.4674 | 1.06  | 0.8369 |
| 94129_at   | 1419842_at   | ---             | Transcribed locus, weakly similar to XP_486      | -1.58 | 0.65 | -1.33 | 0.3915 | 1.15  | 0.6807 | 1.17  | 0.6273 | 5.22  | 0.0112 |
| 94130_at   | 1420706_at   | MGI:1933179     | P140 gene                                        | -1.79 | 0.34 | -1.01 | 0.9713 | 1.09  | 0.6005 | 1.3   | 0.1726 | 1.85  | 0.1279 |
| 94131_at   | 1448070_at   | Xpo1            | exportin 1, CRM1 homolog (yeast)                 | 1.02  | 0.96 | 1.08  | 0.8432 | -1.27 | 0.4448 | -1.04 | 0.8967 | 1.32  | 0.4743 |
| 94132_at   | 1460671_at   | Gpx1            | glutathione peroxidase 1                         | -1.19 | 0.48 | -1.06 | 0.4643 | -1.1  | 0.3002 | -1.08 | 0.3042 | 1.12  | 0.1067 |
| 94134_at   | 1425377_at   | Wnt1            | wingless-related MMTV integration site 1         | -1.68 | 0.14 | -1.15 | 0.178  | -1.03 | 0.7677 | -1.2  | 0.0436 | -1.08 | 0.6065 |
| 94135_at   | 1418159_at   | Tcfcp2          | transcription factor CP2                         | -1.3  | 0.08 | -1.28 | 0.0013 | -1.03 | 0.732  | -1.23 | 0.0182 | -1.09 | 0.2512 |
| 94137_at   | 1421734_at   | Il8rb           | interleukin 8 receptor, beta                     | -2.48 | 0.05 | -1.12 | 0.6037 | 1.17  | 0.2859 | -1.1  | 0.6714 | 1.32  | 0.1406 |
| 94138_s_at | 1420756_at   | Fut7            | fucosyltransferase 7                             | -1.47 | 0.08 | -1.04 | 0.7428 | 1.09  | 0.519  | -1.03 | 0.8109 | -1.07 | 0.5635 |
| 94139_at   | 1449179_at   | Pdc             | phosducin                                        | 1.41  | 0.38 | -1.46 | 0.2389 | 1.07  | 0.859  | -1.41 | 0.3068 | 1.41  | 0.2357 |
| 94141_at   | 1422122_at   | Fcer2a          | Fc receptor, IgE, low affinity II, alpha polypep | -1.24 | 0.73 | 2.07  | 0.0185 | 1.43  | 0.2303 | 2.01  | 0.0328 | 2.3   | 0.1003 |
| 94142_at   | 1419427_at   | Csf3            | colony stimulating factor 3 (granulocyte)        | -1.46 | 0.13 | -1.16 | 0.4157 | -1.09 | 0.5177 | -1.25 | 0.1351 | 1.39  | 0.3617 |
| 94144_g_at | 1426509_s_at | ---             | ---                                              | -1.09 | 0.69 | -1.16 | 0.4396 | -1.16 | 0.5067 | -1.23 | 0.3225 | -1.29 | 0.2005 |
| 94145_at   | 1422305_at   | lfnb1           | interferon beta 1, fibroblast                    | -2.69 | 0.05 | -1.12 | 0.7396 | -1.44 | 0.3926 | -1.29 | 0.5308 | 1.47  | 0.4815 |
| 94146_at   | 1421578_at   | Ccl4            | chemokine (C-C motif) ligand 4                   | -1.54 | 0.42 | 1.14  | 0.306  | 1.02  | 0.9348 | -1.04 | 0.7756 | -1.11 | 0.6651 |
| 94147_at   | 1419149_at   | Serpine1        | serine (or cysteine) proteinase inhibitor, clac  | -1.47 | 0.32 | 2.52  | 0.2879 | -1.36 | 0.1833 | 2.29  | 0.188  | 1.39  | 0.5949 |
| 94148_at   | 1420440_at   | Ppy             | pancreatic polypeptide                           | -1.46 | 0.45 | 1.14  | 0.4089 | 1.05  | 0.7217 | 1.13  | 0.3385 | -1.07 | 0.8771 |
| 94149_at   | 1450132_at   | Hivep3          | human immunodeficiency virus type I enhan        | -1.41 | 0.25 | -1.1  | 0.6904 | -1.05 | 0.8401 | -1.17 | 0.5512 | 1.32  | 0.2399 |
| 94150_at   | 1419025_at   | Sag             | retinal S-antigen                                | 2.14  | 0.26 | 1.03  | 0.9022 | 1.28  | 0.2807 | 1.12  | 0.542  | 1.05  | 0.9258 |
| 94151_at   | 1449212_at   | Pip             | prolactin induced protein                        | -1.53 | 0.62 | -1.38 | 0.3591 | 1.3   | 0.4615 | -1.47 | 0.325  | 1.79  | 0.4741 |
| 94153_g_at | 1448168_a_at | Spt1            | salivary protein 1                               | -1.16 | 0.45 | 1.04  | 0.79   | -1.02 | 0.861  | -1    | 0.981  | 1.12  | 0.6352 |
| 94154_at   | 1450790_at   | Tgn             | thyroglobulin                                    | 1.18  | 0.41 | 1.06  | 0.52   | -1.11 | 0.3104 | -1.07 | 0.4278 | 1.12  | 0.7082 |
| 94155_at   | 1448285_at   | Rgs4            | regulator of G-protein signaling 4               | -1.68 | 0.4  | 1.06  | 0.7338 | 1.66  | 0.0452 | 1.07  | 0.7245 | 1.12  | 0.3749 |
| 94156_at   | 1422790_at   | Nppc            | natriuretic peptide precursor type C             | -7.18 | 0.05 | -1    | 0.9904 | -1.19 | 0.1843 | 1.04  | 0.8712 | 2.45  | 0.3102 |
| 94158_f_at | 1427872_at   | Ptafr           | platelet-activating factor receptor              | -1.09 | 0.86 | -1.2  | 0.1182 | -1.28 | 0.0933 | -1.03 | 0.8633 | 1.04  | 0.856  |
| 94161_at   | 1449956_at   | Prkce           | protein kinase C, epsilon                        | 1.39  | 0.39 | -1.03 | 0.8074 | -1.09 | 0.6352 | -1.56 | 0.0161 | -1.08 | 0.6156 |
| 94163_at   | 1421286_a_at | Atp4a           | ATPase, H+/K+ transporting, alpha polypept       | -1.13 | 0.44 | -1.12 | 0.0744 | -1.02 | 0.7412 | -1.23 | 0.0092 | 1.18  | 0.3207 |
| 94164_at   | 1419694_at   | St8sia1         | ST8 alpha-N-acetyl-neuraminide alpha-2,8-s       | -3.47 | 0.28 | -1.14 | 0.3385 | 1.51  | 0.1963 | -1.07 | 0.6402 | 1.59  | 0.0901 |
| 94166_g_at | 1421688_a_at | Ccl1 /// BF5343 | chemokine (C-C motif) ligand 1 /// expressec     | -1.71 | 0.37 | -1.05 | 0.6388 | -1.04 | 0.787  | -1.17 | 0.2096 | 1.57  | 0.1311 |
| 94167_at   | 1422622_at   | Nos3            | nitric oxide synthase 3, endothelial cell        | 1.18  | 0.08 | 1.15  | 0.4434 | 1.33  | 0.0409 | -1.05 | 0.7055 | 1.24  | 0.4733 |
| 94168_at   | 1420802_at   | Il13            | interleukin 13                                   | 1.04  | 0.91 | 1.1   | 0.5421 | 1.04  | 0.7026 | 1.16  | 0.2291 | 1.33  | 0.2636 |
| 94169_at   | 1450473_at   | Pcdh12          | protocadherin 12                                 | -1.27 | 0.5  | 1.09  | 0.2207 | 1.06  | 0.5173 | -1.05 | 0.6642 | 1.06  | 0.6077 |
| 94170_at   | 1460322_at   | Chst3           | carbohydrate (chondroitin 6/keratan) sulfotr     | 1.5   | 0.05 | -1.02 | 0.9325 | 1.02  | 0.9097 | -1.21 | 0.2763 | -1.32 | 0.37   |
| 94171_at   | 1449829_at   | Itgb2l          | integrin beta 2-like                             | -1.32 | 0.38 | 1.26  | 0.3769 | 1.34  | 0.2519 | 1.31  | 0.2458 | 1.51  | 0.0009 |
| 94172_at   | 1453950_a_at | Xrcc2           | X-ray repair complementing defective repair      | -1    | 0.99 | -1.23 | 0.4616 | -1.01 | 0.9658 | -1.23 | 0.5408 | 1.21  | 0.6587 |
| 94173_at   | 1449925_at   | Cxcr3           | chemokine (C-X-C motif) receptor 3               | -2.45 | 0.27 | 1.27  | 0.1224 | 1.21  | 0.0853 | 1.11  | 0.4565 | 1.7   | 0.1669 |
| 94174_at   | 1420929_at   | Catnal1         | catenin alpha-like 1                             | -2.19 | 0.18 | 1.01  | 0.9577 | 1.35  | 0.0455 | -1.04 | 0.8012 | 1.34  | 0.1286 |
| 94175_at   | 1421558_at   | T2              | brachyury 2                                      | -1.53 | 0.28 | 1.19  | 0.5653 | -1.06 | 0.8413 | 1.07  | 0.7749 | -1.2  | 0.4608 |
| 94176_at   | 1425094_a_at | Lhx6            | LIM homeobox protein 6                           | -1.44 | 0.06 | 1.11  | 0.3781 | 1.16  | 0.2532 | -1.23 | 0.1302 | -1.12 | 0.4938 |
| 94177_at   | 1417871_at   | Hsd17b7         | hydroxysteroid (17-beta) dehydrogenase 7         | -1.08 | 0.9  | -1.14 | 0.2813 | -1.47 | 0.0252 | -1.59 | 0.0026 | -1.23 | 0.3766 |
| 94178_at   | 1421586_a_at | Mcp             | membrane cofactor protein                        | 2.29  | 0.03 | 1.3   | 0.2834 | 2.26  | 0.0505 | 1.45  | 0.1073 | 2.03  | 0.1502 |
| 94180_s_at | 1420694_a_at | Dach1           | dachshund 1 (Drosophila)                         | -3.14 | 0.13 | -1    | 0.9876 | 1.23  | 0.5688 | 1.22  | 0.6859 | 1.99  | 0.0979 |
| 94181_at   | 1420764_at   | Scrg1           | scrapie responsive gene 1                        | -2.12 | 0.06 | 1.48  | 0.3046 | 1.07  | 0.586  | 1.06  | 0.6364 | 1.33  | 0.3265 |
| 94182_at   | 1420596_at   | Cacong2         | calcium channel, voltage-dependent, gamma        | -4.84 | 0.09 | 1.22  | 0.3876 | 1.48  | 0.007  | 1.19  | 0.1038 | 1.32  | 0.1485 |
| 94183_at   | 1420358_at   | Krtap13         | keratin associated protein 13                    | -1.17 | 0.76 | -1.06 | 0.5824 | -1.05 | 0.5939 | -1.13 | 0.2578 | 1.55  | 0.3059 |

|            |              |                 |                                                  |       |      |       |        |       |        |       |        |       |        |
|------------|--------------|-----------------|--------------------------------------------------|-------|------|-------|--------|-------|--------|-------|--------|-------|--------|
| 94184_at   | 1451708_at   | Gpr33           | G protein-coupled receptor 33                    | -1.72 | 0.14 | -1.11 | 0.4294 | 1.23  | 0.1421 | 1.01  | 0.8744 | -1.42 | 0.0553 |
| 94185_at   | 1421419_at   | Kcnc4           | potassium channel, subfamily K, member 4         | -1.09 | 0.86 | 1.4   | 0.1685 | 1.29  | 0.3327 | 1.23  | 0.3931 | 2.18  | 0.0202 |
| 94186_at   | 1423602_at   | Traf1           | Tnf receptor-associated factor 1                 | 1.62  | 0.25 | 1.06  | 0.7437 | -1.06 | 0.5602 | 1.24  | 0.1442 | 1.5   | 0.2114 |
| 94187_at   | 1421412_at   | Gsc             | goosecoid                                        | -3.07 | 0.28 | -1.2  | 0.1319 | -1.02 | 0.8608 | -1.07 | 0.443  | -1.16 | 0.4966 |
| 94188_at   | 1451023_at   | Hcn3            | hyperpolarization-activated, cyclic nucleotide   | -1.33 | 0.06 | 1.07  | 0.6887 | 1     | 0.9809 | 1.11  | 0.5139 | 1.08  | 0.4995 |
| 94189_at   | 1418421_at   | Bcl6b           | B-cell CLL/lymphoma 6, member B                  | -1.05 | 0.73 | 1.19  | 0.2862 | -1.08 | 0.6214 | -1.18 | 0.3007 | 1.11  | 0.7191 |
| 94190_at   | 1420782_at   | Tnfrsf17        | tumor necrosis factor receptor superfamily, r    | -1.17 | 0.28 | 1.02  | 0.9268 | -1.21 | 0.2188 | -1.12 | 0.5356 | 1.56  | 0.1135 |
| 94192_at   | 1420342_at   | Gdap10          | Ganglioside-induced differentiation-associat     | 1.14  | 0.82 | 1.13  | 0.6835 | -2.96 | 0.001  | -1.87 | 0.0576 | 1.32  | 0.2152 |
| 94193_at   | 1450490_at   | Kcna7           | potassium voltage-gated channel, shaker-re       | 1.26  | 0.71 | -1.02 | 0.9482 | 1.12  | 0.7121 | -1.01 | 0.9577 | 1.04  | 0.8579 |
| 94195_r_at | 1421154_at   | Hcn2            | hyperpolarization-activated, cyclic nucleotide   | -1.45 | 0.03 | 1.03  | 0.6935 | 1.11  | 0.0833 | 1     | 0.9491 | 1.41  | 0.1506 |
| 94196_at   | 1450161_at   | Ikbg            | inhibitor of kappaB kinase gamma                 | 1.25  | 0.36 | -1.01 | 0.9102 | -1.07 | 0.2496 | -1.11 | 0.1709 | -1.47 | 0.1104 |
| 94197_at   | 1421268_at   | Ugcg            | UDP-glucose ceramide glucosyltransferase         | 1     | 1    | -1.15 | 0.2774 | -1.05 | 0.7687 | -1.33 | 0.0502 | -1.11 | 0.5961 |
| 94198_at   | 1425703_at   | Ppard           | peroxisome proliferator activator receptor de    | 1.24  | 0.71 | -1.4  | 0.2657 | -1.24 | 0.5252 | -1.01 | 0.9846 | 1.6   | 0.0747 |
| 94199_at   | 1415969_s_at | Kap             | kidney androgen regulated protein                | -1.95 | 0.26 | 1.04  | 0.9079 | -1.52 | 0.1326 | -1.06 | 0.7609 | -1.05 | 0.8992 |
| 94200_at   | 1420337_at   | Gbx2            | gastrulation brain homeobox 2                    | -1.23 | 0.47 | 1.12  | 0.3231 | 1.2   | 0.1253 | 1.23  | 0.3936 | 1.6   | 0.1091 |
| 94201_at   | 1450121_at   | ---             | ---                                              | -2.36 | 0.25 | 1.13  | 0.4573 | 1.2   | 0.3405 | 1.57  | 0.0201 | 3.81  | 0.2063 |
| 94202_at   | 1427628_at   | Tcrb-V8.2       | T-cell receptor beta, variable 8.2               | -1.02 | 0.97 | 1.08  | 0.5845 | 1.13  | 0.4341 | 1.05  | 0.7357 | 1.06  | 0.9077 |
| 94203_at   | 1459928_at   | MGI:2443930     | Mblk1-related protein-2                          | -1.81 | 0.14 | -1.3  | 0.0234 | -1.48 | 0.0187 | -1.61 | 0.0007 | 1.73  | 0.1788 |
| 94205_at   | 1449136_at   | ---             | ---                                              | -1.42 | 0.16 | -1.16 | 0.2699 | -1.07 | 0.6267 | -1.11 | 0.4358 | 1.57  | 0.2396 |
| 94206_at   | 1416522_a_at | Grccl0          | gene rich cluster, C10 gene                      | 1.12  | 0.76 | 1.04  | 0.4992 | 1.01  | 0.8959 | 1.08  | 0.1088 | 1.17  | 0.2137 |
| 94210_at   | 1455211_a_at | Timm9           | translocase of inner mitochondrial membran       | -1.06 | 0.56 | -1.02 | 0.6505 | -1.06 | 0.5803 | -1.18 | 0.0139 | -1.2  | 0.4854 |
| 94211_at   | 1452073_at   | 6720460F02Rik   | RIKEN cDNA 6720460F02 gene                       | -1.13 | 0.83 | 1.49  | 0.1583 | -1.14 | 0.6939 | 1.17  | 0.6668 | 1.13  | 0.8026 |
| 94212_at   | 1425557_x_at | Tsc22d3         | TSC22 domain family 3                            | 1.14  | 0.48 | -1.54 | 0.1645 | -1.21 | 0.5294 | 1.08  | 0.8001 | -1.2  | 0.4873 |
| 94214_at   | 1416023_at   | Fabp3           | fatty acid binding protein 3, muscle and hear    | -1.19 | 0.51 | -1.46 | 0.3699 | -1.08 | 0.8411 | -1.7  | 0.2697 | -1.39 | 0.5249 |
| 94216_at   | 1448630_a_at | Sdhc            | succinate dehydrogenase complex, subunit         | 1.1   | 0.43 | -1.01 | 0.824  | -1.04 | 0.5939 | -1.04 | 0.5378 | -1.09 | 0.4058 |
| 94218_at   | 1448122_at   | Tcp1            | t-complex protein 1                              | 1.4   | 0.26 | -1.17 | 0.038  | -1.05 | 0.5021 | -1.12 | 0.3774 | 1.65  | 0.0105 |
| 94219_at   | 1448262_at   | Psmb2           | proteasome (prosome, macropain) subunit, l       | 1.11  | 0.76 | -1.07 | 0.382  | -1.16 | 0.0238 | 1.08  | 0.3261 | -1.26 | 0.051  |
| 94222_at   | 1437406_x_at | Igfbbp4         | insulin-like growth factor binding protein 4     | -1.19 | 0.43 | -1.02 | 0.8419 | -1.01 | 0.8936 | -1.09 | 0.46   | 1.26  | 0.0606 |
| 94224_s_at | 1452349_x_at | Ifi205 /// Mnda | interferon activated gene 205 /// myeloid cell   | 1.68  | 0.1  | 4.68  | 0.2057 | -1.53 | 0.3728 | 7.1   | 0.2212 | 1.39  | 0.1259 |
| 94225_at   | 1415684_at   | Apg5l           | autophagy 5-like (S. cerevisiae)                 | -1.2  | 0.16 | -1.13 | 0.0121 | -1.14 | 0.0614 | -1.34 | 0      | -1.78 | 0.0001 |
| 94226_at   | 1425068_a_at | Tex264          | testis expressed gene 264                        | 1.67  | 0.09 | 1.1   | 0.2466 | -1    | 0.9696 | 1.01  | 0.8268 | 1.21  | 0.5623 |
| 94227_at   | 1422209_s_at | 2310040M23Rik   | RIKEN cDNA 2310040M23 gene                       | -1.2  | 0.61 | 1.13  | 0.253  | 1.18  | 0.1257 | 1.09  | 0.3684 | 1.19  | 0.1528 |
| 94228_at   | 1418442_at   | Xpo1            | exportin 1, CRM1 homolog (yeast)                 | 1.23  | 0.52 | -1.02 | 0.8876 | -1.13 | 0.6436 | -1.03 | 0.7887 | 1.12  | 0.7083 |
| 94229_at   | 1448412_a_at | Tsc22d4         | TSC22 domain family 4                            | -1.12 | 0.37 | 1.04  | 0.4725 | -1.06 | 0.3537 | 1.05  | 0.5706 | 1.21  | 0.1612 |
| 94231_at   | 1417419_at   | Ccnd1           | cyclin D1                                        | -2.82 | 0.08 | -1.76 | 0      | -1.07 | 0.5394 | -1.69 | 0.0024 | 2.11  | 0.0992 |
| 94232_at   | 1448698_at   | Ccnd1           | cyclin D1                                        | -1.14 | 0.43 | -1.66 | 0.0088 | 1.37  | 0.0486 | -1.52 | 0.0217 | 1.4   | 0.0041 |
| 94233_at   | 1416885_at   | 1110038F14Rik   | RIKEN cDNA 1110038F14 gene                       | 1.46  | 0.15 | 1.32  | 0.0204 | 1.2   | 0.1299 | 1.22  | 0.1649 | 1.47  | 0.2269 |
| 94235_at   | 1423901_at   | Trip12          | thyroid hormone receptor interactor 12           | 1.19  | 0.7  | -1.07 | 0.5102 | 1.04  | 0.6383 | 1.06  | 0.4732 | -1.1  | 0.619  |
| 94236_at   | 1452156_a_at | Nisch           | nischarin                                        | -1.02 | 0.9  | -1.05 | 0.4638 | -1.03 | 0.6446 | -1.05 | 0.4844 | -1.08 | 0.5614 |
| 94237_at   | 1448353_x_at | Rpn1            | ribophorin I                                     | 1.02  | 0.93 | -1.01 | 0.8838 | -1.18 | 0.0554 | -1.06 | 0.3136 | -1.49 | 0.1228 |
| 94238_at   | 1431057_a_at | 2310046G15Rik   | RIKEN cDNA 2310046G15 gene                       | 1.3   | 0.53 | 1.51  | 0.0742 | 1.25  | 0.4136 | 1.63  | 0.0328 | -2.33 | 0.0825 |
| 94239_at   | 1450938_at   | ---             | ---                                              | -1.15 | 0.76 | 1.01  | 0.9515 | 1.03  | 0.7572 | -1.09 | 0.391  | 1.1   | 0.6269 |
| 94240_i_at | 1455348_x_at | Rpl29 /// LOC24 | ribosomal protein L29 /// similar to ribosomal   | -1.68 | 0.33 | -1.75 | 0.2682 | -1.49 | 0.414  | -1.19 | 0.6596 | 1.2   | 0.5778 |
| 94241_at   | 1423701_at   | Coasy           | Coenzyme A synthase                              | 1.49  | 0.04 | -1.16 | 0.0068 | -1.04 | 0.4227 | -1.01 | 0.874  | -1.26 | 0.0324 |
| 94242_at   | 1423036_at   | Txn15           | thioredoxin-like 5                               | 1.25  | 0.11 | 1.11  | 0.1249 | 1.15  | 0.3256 | 1.13  | 0.0262 | -1.04 | 0.5535 |
| 94243_at   | 1437349_at   | 4930432B04Rik   | RIKEN cDNA 4930432B04 gene                       | 1.92  | 0.11 | -1.11 | 0.2573 | -1    | 0.987  | -1.05 | 0.6536 | 1.01  | 0.9532 |
| 94244_at   | 1452694_at   | Ihpk1           | inositol hexaphosphate kinase 1                  | -1.66 | 0    | 1.03  | 0.6533 | 1.11  | 0.2536 | 1.13  | 0.1347 | 1.6   | 0.0269 |
| 94246_at   | 1416268_at   | Ets2            | E26 avian leukemia oncogene 2, 3' domain         | 1.05  | 0.57 | 1.09  | 0.4892 | 1.34  | 0      | 1.15  | 0.1586 | 1.77  | 0.0263 |
| 94247_at   | 1435494_s_at | Dsp             | desmoplakin                                      | -1.28 | 0.3  | -1.04 | 0.8091 | 1.4   | 0.0216 | -1.03 | 0.7496 | -1.1  | 0.4531 |
| 94248_at   | 1416307_at   | Ap1m1           | adaptor-related protein complex AP-1, mu s1      | -1.21 | 0.41 | -1.07 | 0.3474 | -1.08 | 0.3815 | -1.06 | 0.4613 | 1.22  | 0.0638 |
| 94249_at   | 1415679_at   | Psenen          | presenilin enhancer 2 homolog (C. elegans)       | 1.34  | 0.09 | -1.01 | 0.8932 | -1.01 | 0.8956 | 1.02  | 0.7955 | 1.15  | 0.1156 |
| 94250_at   | 1416659_at   | Eif3s10         | eukaryotic translation initiation factor 3, subu | 1.28  | 0.32 | 1.23  | 0.1256 | 1.34  | 0.0123 | 1.2   | 0.1138 | 1.04  | 0.7067 |
| 94252_at   | 1451090_a_at | Eif2s3x         | eukaryotic translation initiation factor 2, subu | -1.37 | 0.22 | -1.06 | 0.2063 | 1     | 0.9208 | -1.18 | 0.0031 | -1.14 | 0.0319 |

|            |              |               |                                                       |       |      |       |        |       |        |       |        |       |        |
|------------|--------------|---------------|-------------------------------------------------------|-------|------|-------|--------|-------|--------|-------|--------|-------|--------|
| 94253_at   | 1452662_a_at | Eif2s1        | eukaryotic translation initiation factor 2, subunit 1 | 1.97  | 0.01 | -1.03 | 0.5802 | -1.03 | 0.6324 | -1    | 0.9441 | -1.1  | 0.5191 |
| 94255_g_at | 1423393_at   | Clic4         | chloride intracellular channel 4 (mitochondrial)      | -1.22 | 0.5  | 1.12  | 0.5277 | -1.26 | 0.0082 | 1.04  | 0.7368 | 1.11  | 0.203  |
| 94256_at   | 1438606_a_at | Clic4         | chloride intracellular channel 4 (mitochondrial)      | -1.5  | 0.26 | 1.09  | 0.61   | 1.17  | 0.2212 | 1.23  | 0.153  | 1.31  | 0.2133 |
| 94257_at   | 1428905_at   | Rraga         | Ras-related GTP binding A                             | -1.18 | 0.61 | -1.04 | 0.5337 | -1.39 | 0.0126 | -1.23 | 0.0219 | -1.21 | 0.3138 |
| 94258_at   | 1426454_at   | Arhgdib       | Rho, GDP dissociation inhibitor (GDI) beta            | -1.08 | 0.61 | 1.08  | 0.529  | -1.1  | 0.1348 | 1.16  | 0.2967 | 1.37  | 0.0154 |
| 94259_at   | 1417998_at   | MGI:1929282   | telomerase binding protein, p23                       | 1.79  | 0.09 | 1.07  | 0.2277 | -1.09 | 0.2308 | -1.02 | 0.8283 | 1.01  | 0.871  |
| 94260_at   | 1428244_at   | 3110040D16Rik | RIKEN cDNA 3110040D16 gene                            | -1    | 0.98 | -1.13 | 0.0596 | -1.09 | 0.0531 | -1.07 | 0.1519 | 1.08  | 0.3801 |
| 94261_at   | 1460545_at   | Thrap3        | thyroid hormone receptor associated protein           | -1.06 | 0.63 | 1.09  | 0.2407 | 1.23  | 0.0153 | 1.17  | 0.0183 | 1.58  | 0.0095 |
| 94263_f_at | 1416240_at   | Psmb7         | proteasome (prosome, macropain) subunit, long form    | 1.22  | 0.13 | 1.12  | 0.0427 | 1.1   | 0.1953 | 1.13  | 0.0058 | -1.12 | 0.3394 |
| 94264_at   | 1425419_a_at | Raf1          | v-raf-1 leukemia viral oncogene 1                     | -1.14 | 0.2  | 1.04  | 0.4513 | 1.17  | 0.04   | 1.12  | 0.1714 | 1.46  | 0.0053 |
| 94266_at   | 1428406_s_at | Hcfc1r1       | host cell factor C1 regulator 1 (XPO1-dependent)      | -1.01 | 0.88 | -1.03 | 0.5768 | -1.14 | 0.0062 | -1.12 | 0.0244 | -1.17 | 0.2159 |
| 94268_f_at | 1416848_at   | Ubl5          | ubiquitin-like 5                                      | -1    | 0.97 | 1.11  | 0.0019 | 1.08  | 0.3197 | 1.1   | 0.0047 | -1.07 | 0.5878 |
| 94269_at   | 1427773_a_at | Rabac1        | Rab acceptor 1 (prenylated)                           | 1.27  | 0.6  | 1.14  | 0.0585 | -1    | 0.9987 | 1.13  | 0.0492 | 1.23  | 0.2643 |
| 94270_at   | 1448169_at   | Krt1-18       | keratin complex 1, acidic, gene 18                    | 1.66  | 0.13 | 1.13  | 0.5082 | 1.05  | 0.5277 | 1.28  | 0.013  | 1.03  | 0.8673 |
| 94273_at   | 1449142_a_at | 2610311119Rik | RIKEN cDNA 2610311119 gene                            | 1.01  | 0.95 | -1.16 | 0.0521 | -1.15 | 0.1073 | -1.13 | 0.0264 | -1.18 | 0.308  |
| 94274_at   | 1416726_s_at | Ube2s         | ubiquitin-conjugating enzyme E2S                      | 1.17  | 0.55 | -1.06 | 0.5232 | -1.02 | 0.8603 | -1.02 | 0.7943 | 1.2   | 0.146  |
| 94275_at   | 1417206_at   | Urod          | uroporphyrinogen decarboxylase                        | 1.13  | 0.4  | 1.06  | 0.3313 | 1.17  | 0.0668 | 1.08  | 0.3174 | -1.07 | 0.4404 |
| 94276_at   | 1450011_at   | Hsd17b12      | hydroxysteroid (17-beta) dehydrogenase 12             | -1.11 | 0.35 | -1.15 | 0.0342 | -1.1  | 0.2666 | -1.18 | 0.0015 | -2.95 | 0.0001 |
| 94277_at   | 1418522_at   | Mtx1          | metaxin 1                                             | -1.21 | 0.15 | -1.33 | 0.0003 | -1.26 | 0.0517 | -1.13 | 0.2191 | 1.25  | 0.1995 |
| 94278_at   | 1415983_at   | Lcp1          | lymphocyte cytosolic protein 1                        | -1.27 | 0.09 | -1.06 | 0.5956 | -1.2  | 0.0254 | 1.01  | 0.9626 | -1.76 | 0.0035 |
| 94281_at   | 1454602_s_at | Cnot2         | CCR4-NOT transcription complex, subunit 2             | 1.34  | 0.1  | 1.12  | 0.0199 | 1.09  | 0.1499 | 1.12  | 0.0264 | 1.19  | 0.011  |
| 94282_at   | 1416735_at   | Asah1         | N-acylsphingosine amidohydrolase 1                    | -1.24 | 0.21 | -1.06 | 0.5201 | 1.11  | 0.1571 | 1.07  | 0.6362 | 1.04  | 0.6701 |
| 94284_at   | 1422186_s_at | Dia1          | diaphorase 1 (NADH)                                   | 1.08  | 0.55 | -1.45 | 0.0009 | -1.56 | 0.0004 | -1.52 | 0.0004 | -1.67 | 0.02   |
| 94285_at   | 1417025_at   | H2-Eb1        | histocompatibility 2, class II antigen E beta         | -1.02 | 0.95 | 2.65  | 0.1748 | -1.2  | 0.2737 | 2.49  | 0.2006 | 1.8   | 0.0127 |
| 94286_at   | 1415705_at   | 9130011J15Rik | RIKEN cDNA 9130011J15 gene                            | 1.33  | 0.09 | 1.07  | 0.3036 | 1.01  | 0.8141 | 1.11  | 0.048  | -1.19 | 0.1923 |
| 94289_r_at | 1426306_a_at | Maged2        | melanoma antigen, family D, 2                         | -1.3  | 0.2  | -1.05 | 0.5418 | 1.13  | 0.116  | 1.2   | 0.0704 | 1.26  | 0.4535 |
| 94291_at   | 1452543_a_at | Scgb1a1       | secretoglobulin, family 1A, member 1 (uteroglobin)    | -1.26 | 0.38 | 1.11  | 0.7163 | 1.15  | 0.6105 | 1.14  | 0.6233 | 1.37  | 0.5439 |
| 94292_at   | 1419912_s_at | Strap         | Serine/threonine kinase receptor associated           | -1.18 | 0.26 | 1.14  | 0.3472 | 1.32  | 0.1449 | 1.09  | 0.4806 | -1.15 | 0.4222 |
| 94294_at   | 1450920_at   | Ccnb2         | cyclin B2                                             | -1.89 | 0.04 | 1.2   | 0.0607 | 1.07  | 0.3955 | 1.42  | 0.0305 | 1.1   | 0.5447 |
| 94295_at   | 1425628_a_at | ---           | ---                                                   | -1.13 | 0.54 | -1.07 | 0.2155 | -1.06 | 0.5654 | -1.06 | 0.244  | 1.05  | 0.6195 |
| 94296_s_at | 1460279_a_at | Gtf2i         | general transcription factor II I                     | 1.66  | 0.55 | -1.12 | 0.071  | -1.11 | 0.399  | -1.31 | 0.0092 | -1.58 | 0.2922 |
| 94297_at   | 1416125_at   | Fkbp5         | FK506 binding protein 5                               | -2.72 | 0.03 | -2.04 | 0.0013 | 1.43  | 0.1411 | -1.7  | 0.0057 | -1.02 | 0.9349 |
| 94298_at   | 1448495_at   | Tsta3         | tissue specific transplantation antigen P35B          | 1.03  | 0.89 | 1.04  | 0.5907 | 1.13  | 0.206  | 1.17  | 0.0552 | 1.04  | 0.6431 |
| 94299_at   | 1424461_at   | Dctn2         | dynactin 2                                            | 1.93  | 0.15 | 1.12  | 0.202  | 1.21  | 0.2096 | 1.1   | 0.3918 | -1.72 | 0.0531 |
| 94301_at   | 1416328_a_at | Atp6v0e       | ATPase, H+ transporting, V0 subunit                   | 1.47  | 0.11 | 1.07  | 0.4194 | 1.04  | 0.5953 | 1.18  | 0.1536 | -1.07 | 0.4043 |
| 94302_at   | 1418874_a_at | Psmc4         | proteasome (prosome, macropain) 26S subunit 4         | 1.4   | 0.03 | 1.1   | 0.1641 | 1.07  | 0.4827 | 1.19  | 0.006  | -1.19 | 0.0816 |
| 94303_at   | 1425142_a_at | Hnrpd         | heterogeneous nuclear ribonucleoprotein D             | -1.12 | 0.49 | 1.06  | 0.4254 | 1.08  | 0.2131 | 1.16  | 0.0745 | 1.12  | 0.4312 |
| 94304_at   | 1415818_at   | Anxa6         | annexin A6                                            | 1.26  | 0.37 | -1.08 | 0.3616 | -1.1  | 0.1063 | -1.06 | 0.427  | 1.34  | 0.0766 |
| 94305_at   | 1423669_at   | Col1a1        | procollagen, type I, alpha 1                          | -2.13 | 0.35 | 1.83  | 0.2569 | -1.29 | 0.443  | 2.32  | 0.2017 | 2.08  | 0.3254 |
| 94307_at   | 1422540_at   | ---           | ---                                                   | 1.08  | 0.65 | 1.38  | 0.3886 | 1.28  | 0.4973 | -1    | 0.9897 | 1.54  | 0.3036 |
| 94309_g_at | 1451119_a_at | Fbln1         | fibulin 1                                             | -1.22 | 0.23 | -1.17 | 0.0304 | -1.17 | 0.0581 | -1.06 | 0.454  | 1.5   | 0.0185 |
| 94312_at   | 1452705_at   | AA415817      | expressed sequence AA415817                           | 1.03  | 0.84 | 1.16  | 0.0119 | 1.01  | 0.818  | 1.13  | 0.0947 | 2.32  | 0.0083 |
| 94313_at   | 1416197_at   | Snrp1c        | U1 small nuclear ribonucleoprotein 1C                 | 1.13  | 0.63 | -1.1  | 0.0542 | -1.12 | 0.1386 | -1.09 | 0.0809 | 1.08  | 0.7466 |
| 94318_at   | 1416677_at   | ApoH          | apolipoprotein H                                      | 1.26  | 0.19 | 1.1   | 0.016  | 1.12  | 0.0263 | 1.11  | 0.0041 | 1.34  | 0.0251 |
| 94321_at   | 1452166_a_at | Krt1-10       | keratin complex 1, acidic, gene 10                    | 1.66  | 0.15 | 1.05  | 0.7281 | 1.06  | 0.7407 | 1.07  | 0.6109 | -2.27 | 0.0487 |
| 94322_at   | 1415993_at   | Sqle          | squalene epoxidase                                    | 1.03  | 0.93 | -2.09 | 0.0085 | -1.35 | 0.2279 | -2.66 | 0.0007 | -2.97 | 0.0055 |
| 94323_at   | 1434367_s_at | Nuf2          | nuclear transport factor 2                            | -1.14 | 0.65 | 1     | 0.9931 | -1.04 | 0.5101 | -1.04 | 0.4607 | -1.1  | 0.4501 |
| 94325_at   | 1433445_x_at | Hmgcs1        | 3-hydroxy-3-methylglutaryl-Coenzyme A synthase        | 1.24  | 0.3  | 1.01  | 0.9417 | 1.12  | 0.6493 | -1.34 | 0.0362 | -2.39 | 0.0025 |
| 94327_at   | 1416984_at   | Mrps18a       | mitochondrial ribosomal protein S18A                  | 1.61  | 0.13 | -1.08 | 0.1103 | -1    | 0.9826 | -1.05 | 0.4537 | -1.25 | 0.3705 |
| 94330_at   | 1424265_at   | Npl           | N-acetylneuraminase pyruvate lyase                    | 1.44  | 0.4  | 1.57  | 0.1034 | 1.88  | 0.1119 | 1.76  | 0.2116 | 1.06  | 0.7276 |
| 94331_at   | 1426353_at   | Stat6         | signal transducer and activator of transcription 6    | 1.95  | 0.02 | -1.27 | 0.0324 | -1.15 | 0.0373 | -1.17 | 0.0221 | -1.31 | 0.1585 |
| 94332_at   | 1452163_at   | Ets1          | E26 avian leukemia oncogene 1, 5' domain              | 1     | 1    | 1.21  | 0.1702 | 1.09  | 0.651  | 1.12  | 0.4763 | 1.38  | 0.3392 |
| 94335_r_at | 1418178_at   | Ina           | internexin neuronal intermediate filament precursor   | 1.43  | 0.28 | 1.5   | 0.1619 | 1.3   | 0.3888 | 1.33  | 0.4818 | 2.04  | 0.4034 |

|            |              |              |                                                 |       |      |       |        |       |        |       |        |       |        |
|------------|--------------|--------------|-------------------------------------------------|-------|------|-------|--------|-------|--------|-------|--------|-------|--------|
| 94336_at   | 1448817_at   | Otub1        | OTU domain, ubiquitin aldehyde binding 1        | -1.38 | 0.16 | -1.04 | 0.7488 | -1.15 | 0.1473 | -1.08 | 0.4374 | -1.21 | 0.6934 |
| 94338_g_at | 1450112_a_at | Gas2         | growth arrest specific 2                        | 1.56  | 0.38 | 1.77  | 0.006  | 1.02  | 0.9115 | 1.73  | 0.0015 | -1.47 | 0.0061 |
| 94339_at   | 1426715_s_at | D11Ert18e    | DNA segment, Chr 11, ERATO Doi 18, expr         | -1.42 | 0.2  | -1.52 | 0      | -1.1  | 0.1681 | -1.5  | 0.0001 | -2.17 | 0.0066 |
| 94340_at   | 1428772_at   | Xpot         | exportin, tRNA (nuclear export receptor for t   | 1.28  | 0.26 | -1.15 | 0.0191 | 1.1   | 0.2724 | -1.06 | 0.2549 | -1.24 | 0.1568 |
| 94341_at   | 1422698_s_at | Jarid2       | jumonji, AT rich interactive domain 2           | -1.32 | 0.34 | -1.14 | 0.0636 | -1.13 | 0.0383 | -1.21 | 0.0075 | 1.02  | 0.8903 |
| 94343_at   | 1433887_at   | Dnajc3       | DnaJ (Hsp40) homolog, subfamily C, memb         | -1.21 | 0.61 | -1.3  | 0.0038 | 1     | 0.9997 | -1.31 | 0.0038 | -2.1  | 0.0017 |
| 94345_at   | 1452843_at   | Il6st        | interleukin 6 signal transducer                 | 1.38  | 0.12 | -1.06 | 0.5266 | -1.08 | 0.3694 | -1.05 | 0.6303 | -1.26 | 0.2537 |
| 94346_at   | 1454805_at   | Wtap         | Wilms' tumour 1-associating protein             | 2.07  | 0.01 | 1.2   | 0.08   | 1.17  | 0.2618 | 1.31  | 0.0124 | 1.07  | 0.7678 |
| 94348_f_at | 1422665_a_at | Pcm1         | protein-L-isoaspartate (D-aspartate) O-meth     | 1.13  | 0.33 | 1.09  | 0.0426 | 1     | 0.951  | 1.07  | 0.2317 | 1.21  | 0.0804 |
| 94349_at   | 1434164_s_at | LOC381251    | similar to Nur77 downstream protein 1           | -1.67 | 0.09 | -1.22 | 0.1104 | -1.04 | 0.6633 | -1.18 | 0.1304 | 1.15  | 0.5181 |
| 94351_r_at | 1423627_at   | Nqo1         | NAD(P)H dehydrogenase, quinone 1                | 3.69  | 0.03 | 1.57  | 0.0116 | 1.5   | 0.017  | 1.82  | 0.0096 | 1.74  | 0.2238 |
| 94353_at   | 1417084_at   | Eif4ebp2     | eukaryotic translation initiation factor 4E bin | -1.39 | 0.58 | -1.27 | 0.0703 | -1.29 | 0.0752 | -1.81 | 0.0008 | 1.42  | 0.0203 |
| 94354_at   | 1421840_at   | Abca1        | ATP-binding cassette, sub-family A (ABC1),      | -1.27 | 0.21 | 1.27  | 0.0187 | -1.03 | 0.7302 | 1.21  | 0.0218 | -1.07 | 0.5163 |
| 94355_at   | 1433659_at   | ---          | ---                                             | 3.13  | 0.05 | 1.13  | 0.6064 | 1.17  | 0.4852 | 1.09  | 0.6978 | -3.84 | 0.0477 |
| 94356_at   | 1426957_at   | Trp53bp1     | transformation related protein 53 binding prc   | 1.26  | 0.42 | 1.52  | 0.2698 | 1.65  | 0.2546 | 1.81  | 0.0506 | 1.45  | 0.3529 |
| 94357_at   | 1419057_at   | Slc5a1       | solute carrier family 5 (sodium/glucose cotra   | 1.54  | 0.28 | -1.24 | 0.3972 | 1.84  | 0.3369 | -1.51 | 0.0594 | -1.99 | 0.0895 |
| 94358_at   | 1427119_at   | Spink4       | serine protease inhibitor, Kazal type 4         | 1.01  | 0.95 | 1.11  | 0.4715 | -1    | 0.9959 | 1.14  | 0.5016 | 1.04  | 0.9114 |
| 94359_at   | 1417965_at   | Plekha1      | pleckstrin homology domain containing, fam      | -1.11 | 0.42 | 1.35  | 0.0094 | 1.08  | 0.3398 | 1.3   | 0.0505 | -1.1  | 0.4209 |
| 94360_at   | 1452877_at   | 2700029M09Ri | RIKEN cDNA 2700029M09 gene                      | 1.7   | 0.04 | -1.1  | 0.2544 | -1.06 | 0.6292 | 1.03  | 0.7766 | -1.06 | 0.619  |
| 94361_at   | 1448270_at   | Ddx21        | DEAD (Asp-Glu-Ala-Asp) box polypeptide 2'       | -1.05 | 0.86 | -1.13 | 0.1946 | 1.04  | 0.6375 | -1.22 | 0.077  | 1.23  | 0.3359 |
| 94362_at   | 1454060_a_at | Nras         | neuroblastoma ras oncogene                      | -1.37 | 0.36 | 1.02  | 0.637  | -1    | 0.9575 | -1.02 | 0.6388 | -1.26 | 0.0728 |
| 94363_at   | 1433636_at   | Bms1         | BMS1-like, ribosome assembly protein (yeas      | 1.86  | 0.16 | 1.08  | 0.2968 | 1.34  | 0.006  | 1.19  | 0.006  | 1.57  | 0.153  |
| 94364_at   | 1417087_at   | Glg1         | golgi apparatus protein 1                       | -1.9  | 0.18 | -1.15 | 0.4476 | -1.83 | 0.0031 | -1.63 | 0.0301 | -1.12 | 0.3899 |
| 94365_at   | 1425196_a_at | Hint2        | histidine triad nucleotide binding protein 2    | -1.15 | 0.18 | -1.21 | 0.0484 | -1.2  | 0.0478 | -1.13 | 0.2241 | 1.26  | 0.0255 |
| 94366_at   | 1417779_at   | 2310079N02Ri | RIKEN cDNA 2310079N02 gene                      | 1.03  | 0.64 | 1.25  | 0.0121 | -1.02 | 0.8482 | 1.37  | 0.0004 | -1.17 | 0.4072 |
| 94367_at   | 1448604_at   | Uck2         | uridine-cytidine kinase 2                       | 1.41  | 0.12 | 1.17  | 0.1764 | 1.12  | 0.3763 | 1.27  | 0.2164 | 1.46  | 0.101  |
| 94368_at   | 1460557_at   | Supv3l1      | suppressor of var1, 3-like 1 (S. cerevisiae)    | 1.56  | 0.01 | 1.02  | 0.8166 | 1.1   | 0.2968 | 1.06  | 0.3644 | 1.01  | 0.9725 |
| 94370_at   | 1424502_at   | Oit1         | oncoprotein induced transcript 1                | -1.42 | 0.75 | 1.35  | 0.2299 | 1.51  | 0.4161 | 1.36  | 0.4893 | -1.22 | 0.7172 |
| 94371_at   | 1417237_at   | Pld2         | phospholipase D2                                | -1.74 | 0.03 | 1.05  | 0.5624 | -1.04 | 0.5989 | -1.03 | 0.6538 | 1.18  | 0.6523 |
| 94372_at   | 1449349_at   | Nudt1        | nudix (nucleoside diphosphate linked moiety     | 1.38  | 0.1  | -1.08 | 0.1989 | -1.18 | 0.0334 | -1.27 | 0.0005 | -1.76 | 0.0012 |
| 94373_at   | 1428072_a_at | Dolpp1       | dolichyl pyrophosphate phosphatase 1            | -1.99 | 0.01 | -1.08 | 0.1634 | -1.18 | 0.0636 | -1.22 | 0.0099 | -1.06 | 0.5296 |
| 94374_at   | 1451728_at   | Wdr13        | WD repeat domain 13                             | -1.3  | 0.03 | -1.24 | 0.0043 | 1.02  | 0.7627 | -1.18 | 0.0015 | -1.38 | 0.1682 |
| 94375_at   | 1422612_at   | Hk2          | hexokinase 2                                    | -1.34 | 0.29 | 1.46  | 0.4567 | -1.01 | 0.9716 | 1.55  | 0.4297 | 1.62  | 0.3059 |
| 94376_s_at | 1416748_a_at | Mre11a       | meiotic recombination 11 homolog A (S. cer      | 4.53  | 0.02 | 1.31  | 0.326  | 1.42  | 0.2015 | 1.66  | 0.0468 | 1.29  | 0.247  |
| 94377_at   | 1448942_at   | Gng11        | guanine nucleotide binding protein (G protei    | 1.4   | 0.14 | 1.06  | 0.7844 | 1.16  | 0.4831 | 1.2   | 0.2954 | 3.38  | 0.006  |
| 94378_at   | 1426037_a_at | ---          | ---                                             | 2.33  | 0.05 | 1.98  | 0.0629 | 4.36  | 0.0014 | 3.13  | 0.0002 | 2.55  | 0.0217 |
| 94379_at   | 1425270_at   | Kif1b        | kinesin family member 1B                        | 1.74  | 0.42 | -1.55 | 0.008  | -1.35 | 0.2402 | -1.48 | 0.0194 | 1.22  | 0.3873 |
| 94380_at   | 1435140_at   | Ide          | insulin degrading enzyme                        | 1.05  | 0.92 | 1.01  | 0.9141 | 1.11  | 0.2269 | 1.06  | 0.38   | -4.42 | 0      |
| 94381_at   | 1424399_at   | Uck1         | uridine-cytidine kinase 1                       | -1.34 | 0.23 | -1.78 | 0.0007 | -1.53 | 0.0141 | -2.48 | 0      | -3.25 | 0.0003 |
| 94382_at   | 1428085_at   | 1110057K04Ri | RIKEN cDNA 1110057K04 gene                      | 1.22  | 0.02 | 1.08  | 0.4004 | 1.06  | 0.3775 | 1.28  | 0.0008 | -1.6  | 0.0351 |
| 94383_at   | 1418547_at   | Tfpi2        | tissue factor pathway inhibitor 2               | -1.83 | 0.02 | -1.56 | 0      | -1.28 | 0.048  | -2.43 | 0      | -3.47 | 0.0001 |
| 94384_at   | 1419647_a_at | Ier3         | immediate early response 3                      | 1.15  | 0.65 | 1.62  | 0.318  | 1.14  | 0.4326 | 1.57  | 0.2574 | 2.76  | 0.0434 |
| 94385_at   | 1429763_at   | E430023H19Ri | RIKEN cDNA E430023H19 gene                      | 1.28  | 0.39 | -1.23 | 0.0637 | -1.34 | 0.0218 | -1.18 | 0.0828 | 1.01  | 0.889  |
| 94386_at   | 1435862_at   | Son          | Son cell proliferation protein                  | 1.32  | 0.04 | 1.14  | 0.004  | 1.26  | 0.024  | 1.25  | 0.005  | 1.23  | 0.1081 |
| 94387_at   | 1448639_a_at | Spata5       | spermatogenesis associated 5                    | -1.24 | 0.76 | 1.2   | 0.2326 | 1.49  | 0.2572 | 1.46  | 0.2953 | 1.34  | 0.5658 |
| 94388_at   | 1422718_at   | Ap3s2        | adaptor-related protein complex 3, sigma 2      | 1.22  | 0.35 | -1.16 | 0.1083 | 1.01  | 0.8357 | -1.09 | 0.1986 | -2.35 | 0.046  |
| 94389_at   | 1418656_at   | Lsm5         | LSM5 homolog, U6 small nuclear RNA asso         | 1.08  | 0.85 | 1.03  | 0.9352 | 1.13  | 0.6795 | 1.29  | 0.4283 | 1.12  | 0.7851 |
| 94390_at   | 1433669_at   | Akap8        | A kinase (PRKA) anchor protein 8                | 1.76  | 0.11 | 1.36  | 0.0042 | 1.51  | 0.0028 | 1.52  | 0.0002 | 1.1   | 0.6678 |
| 94391_at   | 1448397_at   | Gjb6         | gap junction membrane channel protein bet       | 1.28  | 0.61 | -1.1  | 0.7376 | -1.13 | 0.683  | -1.3  | 0.4044 | 1.26  | 0.6872 |
| 94392_f_at | 1450717_at   | Ang1         | angiogenin, ribonuclease A family, member       | 2.36  | 0.04 | 1.17  | 0.0043 | 1.01  | 0.9102 | 1.04  | 0.4402 | 2.17  | 0.0004 |
| 94393_r_at | 1416444_at   | Elov12       | elongation of very long chain fatty acids (FE   | -1.59 | 0.17 | -1    | 0.9875 | 1.16  | 0.0956 | 1.03  | 0.6612 | -1.4  | 0.0286 |
| 94394_at   | 1418448_at   | Rras         | Harvey rat sarcoma oncogene, subgroup R         | 1.57  | 0.22 | 1.3   | 0.0054 | -1.03 | 0.7772 | 1.35  | 0.0025 | 1.38  | 0.0494 |
| 94395_at   | 1433640_at   | ---          | ---                                             | -1.03 | 0.83 | 1.23  | 0.0447 | 1.51  | 0.0281 | 1.34  | 0.0042 | 1.54  | 0.2844 |

|            |              |                 |                                                 |       |      |       |        |       |        |       |        |       |        |
|------------|--------------|-----------------|-------------------------------------------------|-------|------|-------|--------|-------|--------|-------|--------|-------|--------|
| 94396_at   | 1448496_a_at | Ing1            | inhibitor of growth family, member 1            | 1.25  | 0.47 | 1.16  | 0.0659 | 1.03  | 0.7868 | 1.17  | 0.1794 | 1.57  | 0.0057 |
| 94397_at   | 1426700_a_at | Usp52           | ubiquitin specific protease 52                  | -1.03 | 0.94 | 1.02  | 0.8271 | 1.11  | 0.1704 | 1.07  | 0.3174 | 1.14  | 0.4986 |
| 94399_at   | 1451330_a_at | Inpp5b          | inositol polyphosphate-5-phosphatase B          | -1.16 | 0.1  | 1.08  | 0.4074 | 1.06  | 0.6367 | 1.06  | 0.6043 | 1.11  | 0.3286 |
| 94400_at   | 1428501_at   | 1110051M20Rik   | RIKEN cDNA 1110051M20 gene                      | -1.22 | 0.77 | 1.1   | 0.6756 | -1.11 | 0.4461 | 1.41  | 0.1081 | 1.94  | 0.3165 |
| 94402_r_at | 1418199_at   | Hemgn           | hemogen                                         | -4.21 | 0.35 | -1.46 | 0.3964 | -1.16 | 0.74   | -1.25 | 0.573  | 2.03  | 0.0583 |
| 94403_at   | 1420196_s_at | Tbc1d14         | TBC1 domain family, member 14                   | 1.06  | 0.67 | 1.21  | 0.0202 | 1.2   | 0.0985 | 1.25  | 0.0233 | 1.03  | 0.8449 |
| 94404_at   | 1418143_at   | Vps45           | vacuolar protein sorting 45 (yeast)             | 1.64  | 0.12 | -1    | 0.9788 | -1.33 | 0.1399 | -1.05 | 0.6682 | -1.16 | 0.61   |
| 94405_at   | 1420148_at   | Slc6a6          | solute carrier family 6 (neurotransmitter tran: | -1.5  | 0.1  | -1.25 | 0.2192 | -1    | 0.9861 | -1.31 | 0.1219 | 1.41  | 0.0482 |
| 94406_at   | 1449148_a_at | Phf1            | putative homeodomain transcription factor 1     | 2.27  | 0.05 | 1.78  | 0.016  | 1.25  | 0.4261 | 1.94  | 0.0018 | 1.93  | 0.0372 |
| 94407_at   | 1416960_at   | B3gat3          | beta-1,3-glucuronyltransferase 3 (glucurono:    | 1.46  | 0.14 | -1    | 0.9812 | 1.06  | 0.4013 | -1.02 | 0.746  | 1.1   | 0.4937 |
| 94408_at   | 1417624_at   | Nab1            | Ngfi-A binding protein 1                        | 1.01  | 0.95 | -1.04 | 0.7411 | 1.18  | 0.0737 | 1.11  | 0.1986 | 1.09  | 0.5651 |
| 94409_at   | 1419802_at   | Ccdc12          | coiled-coil domain containing 12                | -1.03 | 0.86 | -1.04 | 0.7561 | 1.16  | 0.3536 | 1.06  | 0.5652 | 1.43  | 0.0064 |
| 94410_f_at | 1419803_s_at | Ccdc12          | coiled-coil domain containing 12                | 1.15  | 0.2  | -1.1  | 0.0955 | 1.01  | 0.9166 | -1.01 | 0.8974 | -1.06 | 0.7361 |
| 94412_at   | 1416873_a_at | Cdk2            | cyclin-dependent kinase 2                       | 1.05  | 0.66 | 1.16  | 0.1886 | 1.36  | 0.0212 | 1.19  | 0.1286 | 1.23  | 0.173  |
| 94413_at   | 1454929_s_at | Safb            | scaffold attachment factor B                    | 1.17  | 0.38 | 1.17  | 0.0847 | 1.21  | 0.0614 | 1.15  | 0.0804 | 1.51  | 0.0537 |
| 94414_at   | 1436615_a_at | Otc             | ornithine transcarbamylase                      | 1.01  | 0.91 | 1.12  | 0.0656 | -1.01 | 0.8789 | -1    | 0.9999 | -1.01 | 0.9095 |
| 94415_at   | 1440831_at   | 6230421P05Rik   | RIKEN cDNA 6230421P05 gene                      | 1.47  | 0.34 | 1.61  | 0.0117 | 1.42  | 0.1417 | 2.09  | 0.0011 | 2.08  | 0.0517 |
| 94416_at   | 1448714_at   | Rngtt           | RNA guanylyltransferase and 5'-phosphatas       | -1.18 | 0.55 | -1.13 | 0.2271 | -1.09 | 0.3272 | -1.13 | 0.2191 | 1.36  | 0.2154 |
| 94417_at   | 1452446_a_at | 2010008E23Rik   | RIKEN cDNA 2010008E23 gene                      | 1.17  | 0.49 | 1.21  | 0.1058 | 1.1   | 0.456  | 1.19  | 0.1539 | -1.01 | 0.942  |
| 94418_at   | 1417403_at   | Elov6           | ELOVL family member 6, elongation of long       | -1.37 | 0.2  | -3.94 | 0.0055 | -3.47 | 0.0083 | -6.46 | 0.0025 | -2.16 | 0.2222 |
| 94419_at   | 1448132_at   | Slc19a1         | solute carrier family 19 (sodium/hydrogen ex    | 1.12  | 0.82 | 1.64  | 0.2083 | 3.26  | 0.0081 | 3.28  | 0.0003 | 2.56  | 0.0636 |
| 94421_r_at | 1433733_a_at | Cry1            | cryptochrome 1 (photolyase-like)                | 2.2   | 0.19 | -2.14 | 0.0892 | 1.32  | 0.4715 | 1.23  | 0.6079 | 3.25  | 0.1719 |
| 94422_at   | 1434038_at   | Dnajc13         | DnaJ (Hsp40) homolog, subfamily C, memb         | 1.4   | 0.35 | 1.15  | 0.1292 | 1.13  | 0.4105 | 1.2   | 0.0153 | 1.03  | 0.8685 |
| 94423_at   | 1425108_a_at | BC004728        | cDNA sequence BC004728                          | -1.31 | 0.48 | -1.1  | 0.3473 | 1.02  | 0.8603 | -1.17 | 0.121  | -1.11 | 0.4761 |
| 94424_at   | 1433521_at   | LOC433667       | similar to DKFZP566D1346 protein                | 1.34  | 0.25 | 1.08  | 0.4921 | 1.1   | 0.5313 | 1.01  | 0.9035 | 1.44  | 0.0371 |
| 94425_at   | 1422903_at   | Ly86            | lymphocyte antigen 86                           | 1.6   | 0.04 | 1.77  | 0.1381 | 1.19  | 0.5131 | 2.11  | 0.1037 | 1.48  | 0.4255 |
| 94427_at   | 1416017_at   | Copg            | coatomer protein complex, subunit gamma         | 1.13  | 0.51 | -1.04 | 0.4913 | 1.06  | 0.2231 | 1.08  | 0.2289 | -1.35 | 0.1786 |
| 94429_at   | 1418062_at   | Eef1a2          | eukaryotic translation elongation factor 1 alp  | -2.01 | 0.12 | -1.44 | 0.0396 | -1.29 | 0.1671 | -1.61 | 0.0215 | -1.27 | 0.006  |
| 94430_at   | 1451189_at   | Zswim1          | zinc finger, SWIM domain containing 1           | -1.02 | 0.95 | -1.04 | 0.7586 | 1.02  | 0.8703 | -1.03 | 0.742  | -1.21 | 0.6269 |
| 94431_at   | 1420927_at   | St6gal1         | beta galactoside alpha 2,6 sialyltransferase    | -1.56 | 0.08 | 1.24  | 0.1118 | -1.04 | 0.8369 | -1.12 | 0.5392 | -1.47 | 0.3928 |
| 94432_at   | 1420928_at   | St6gal1         | beta galactoside alpha 2,6 sialyltransferase    | 1.17  | 0.32 | 1.27  | 0.0007 | 1.12  | 0.2632 | 1.17  | 0.019  | -1.1  | 0.5665 |
| 94433_at   | 1426722_at   | Slc38a2         | solute carrier family 38, member 2              | -1.28 | 0.44 | 1.01  | 0.9484 | 1.44  | 0.0041 | 1.08  | 0.3354 | 1.48  | 0.0735 |
| 94434_at   | 1424892_at   | Zfp95           | zinc finger protein 95                          | 1.35  | 0.4  | -1.23 | 0.0335 | -1.08 | 0.3243 | -1.23 | 0.0241 | -1.1  | 0.7655 |
| 94435_at   | 1419914_s_at | ---             | ---                                             | 1.26  | 0.24 | 1.14  | 0.0896 | 1.14  | 0.3329 | 1.15  | 0.0764 | -1.02 | 0.8073 |
| 94438_at   | 1416780_at   | Pfkm            | phosphofructokinase, muscle                     | 1.03  | 0.89 | 1.08  | 0.1983 | 1.07  | 0.2524 | 1.15  | 0.0186 | 1.03  | 0.8184 |
| 94439_at   | 1455534_s_at | Osbpl11         | oxysterol binding protein-like 11               | 1.2   | 0.48 | 1.04  | 0.6735 | 1.28  | 0.0522 | 1.12  | 0.2706 | -1.02 | 0.8389 |
| 94440_at   | 1435007_s_at | Al132487        | expressed sequence Al132487                     | 1.15  | 0.52 | 1.26  | 0.1252 | 1.76  | 0.0022 | 1.45  | 0.0336 | 1.06  | 0.7388 |
| 94442_s_at | 1418396_at   | Gpsm3           | G-protein signalling modulator 3 (AGS3-like,    | -1.07 | 0.9  | 2.08  | 0.0059 | -1.31 | 0.3573 | 1.82  | 0.1378 | 1.57  | 0.0535 |
| 94445_at   | 1423725_at   | Pls3            | plastin 3 (T-isoform)                           | 1.19  | 0.45 | 1.25  | 0.0042 | 1.04  | 0.7374 | 1.22  | 0.0097 | -1.59 | 0.0006 |
| 94447_at   | 1433923_at   | Krt2-39         | keratin complex 2, basic, gene 39               | -1.19 | 0.42 | -1.43 | 0.2211 | 1.09  | 0.6745 | -1.25 | 0.4506 | -1.67 | 0.322  |
| 94448_at   | 1418971_x_at | Bcl10           | B-cell leukemia/lymphoma 10                     | 1.03  | 0.88 | 1.15  | 0.1436 | 1.07  | 0.2331 | 1.2   | 0.0854 | -1.03 | 0.9018 |
| 94449_at   | 1423628_s_at | Pcdhgb1 /// Pcd | protocadherin gamma subfamily B, 1 /// prot     | -1.31 | 0.64 | -1.04 | 0.7824 | 1.05  | 0.6995 | -1.22 | 0.2517 | 1.08  | 0.826  |
| 94452_g_at | 1423850_at   | Nsun2           | NOL1/NOP2/Sun domain family 2                   | 1.12  | 0.6  | -1.25 | 0.0021 | -1.06 | 0.3809 | -1.22 | 0.002  | -1.44 | 0.0043 |
| 94454_at   | 1415796_at   | Dazap2          | DAZ associated protein 2                        | 1.31  | 0.13 | 1.24  | 0.0019 | 1.3   | 0.0004 | 1.4   | 0      | 1.21  | 0.0904 |
| 94455_at   | 1448536_at   | Lsm3            | LSM3 homolog, U6 small nuclear RNA asso         | 1.66  | 0.02 | 1.08  | 0.3977 | 1.04  | 0.6299 | -1.01 | 0.8459 | -1.01 | 0.8863 |
| 94456_at   | 1426854_a_at | Set             | SET translocation                               | 1.07  | 0.85 | -1.03 | 0.696  | -1.55 | 0.0013 | -1.23 | 0.0888 | -1.22 | 0.3715 |
| 94457_at   | 1415792_at   | AL033326        | expressed sequence AL033326                     | 1.02  | 0.91 | -1.05 | 0.4188 | -1.12 | 0.1921 | -1.05 | 0.4311 | 1.02  | 0.8213 |
| 94458_at   | 1415995_at   | Casp6           | caspase 6                                       | 1.86  | 0.13 | 1.58  | 0.0041 | 1.6   | 0.0241 | 1.77  | 0.0002 | 2.6   | 0.0001 |
| 94459_at   | 1455152_at   | Al462493        | Expressed sequence Al462493                     | 1.91  | 0.02 | 1.08  | 0.5747 | 1.26  | 0.2331 | -1.04 | 0.7681 | -1.02 | 0.9569 |
| 94460_at   | 1416252_at   | Stk38           | serine/threonine kinase 38                      | -1.01 | 0.92 | 1.2   | 0.0891 | 1.01  | 0.9223 | -1.06 | 0.552  | -1.1  | 0.5666 |
| 94465_g_at | 1416610_a_at | Clcn3           | chloride channel 3                              | 1.45  | 0.44 | 1.17  | 0.2936 | -1.16 | 0.3577 | -1.07 | 0.6319 | 1.11  | 0.5672 |
| 94466_f_at | 1420497_a_at | Cebpz           | CCAAT/enhancer binding protein zeta             | 1.42  | 0.28 | 1.08  | 0.2439 | 1.19  | 0.0835 | 1.07  | 0.3461 | 1.28  | 0.147  |
| 94469_at   | 1448196_at   | Mat2b           | methionine adenosyltransferase II, beta         | 1.2   | 0.09 | 1.04  | 0.4873 | 1.06  | 0.3269 | 1.14  | 0.003  | 1.04  | 0.8172 |

|            |              |               |                                                  |       |      |       |        |       |        |       |        |       |        |
|------------|--------------|---------------|--------------------------------------------------|-------|------|-------|--------|-------|--------|-------|--------|-------|--------|
| 94471_r_at | 1422497_at   | Slc30a5       | solute carrier family 30 (zinc transporter), mem | 1.2   | 0.76 | 1.26  | 0.2191 | 1.11  | 0.5216 | 1.1   | 0.4823 | -1.01 | 0.9381 |
| 94473_at   | 1420131_s_at | Pttg1ip       | pituitary tumor-transforming 1 interacting prc   | -1.12 | 0.23 | -1.16 | 0.0155 | -1.08 | 0.1569 | -1.15 | 0.0754 | -1.51 | 0.0004 |
| 94476_at   | 1430271_x_at | 4930553M18Rik | RIKEN cDNA 4930553M18 gene                       | -1.08 | 0.87 | 1.58  | 0.033  | 1.69  | 0.0067 | 1.38  | 0.0579 | 1.25  | 0.4925 |
| 94478_at   | 1416426_at   | Rab5a         | RAB5A, member RAS oncogene family                | -1.04 | 0.71 | -1    | 0.9558 | 1.17  | 0.1189 | 1.08  | 0.1839 | -1.42 | 0.0198 |
| 94480_at   | 1429014_at   | D1Ertd161e    | DNA segment, Chr 1, ERATO Doi 161, expr          | -1.52 | 0.05 | -1.08 | 0.3356 | -1.01 | 0.898  | -1.05 | 0.5569 | 1.87  | 0.0693 |
| 94481_at   | 1426461_at   | Ugp2          | UDP-glucose pyrophosphorylase 2                  | 2.07  | 0.07 | 1.48  | 0.0004 | 1.08  | 0.6636 | 1.48  | 0.0001 | 2.85  | 0.0005 |
| 94482_at   | 1460646_at   | Csnk2a2       | casein kinase II, alpha 2, polypeptide           | 1.16  | 0.59 | 1.22  | 0.0878 | 1.37  | 0.0197 | 1.31  | 0.0009 | 1.24  | 0.0146 |
| 94483_at   | 1453099_at   | Csnk2a2       | casein kinase II, alpha 2, polypeptide           | -1.24 | 0.3  | 1.37  | 0.1065 | -1.24 | 0.0141 | -1.19 | 0.2214 | 1.49  | 0.0621 |
| 94484_at   | 1421029_a_at | Hbs1l         | Hbs1-like (S. cerevisiae)                        | 1.35  | 0.35 | 1.01  | 0.8722 | 1.17  | 0.016  | -1.1  | 0.1431 | 1.06  | 0.4247 |
| 94485_at   | 1431012_a_at | Peci          | peroxisomal delta3, delta2-enoyl-Coenzyme        | 1.74  | 0.06 | 1.27  | 0.0445 | 1.34  | 0.003  | 1.55  | 0.0006 | 1.31  | 0.2071 |
| 94486_at   | 1416234_at   | AA959742      | expressed sequence AA959742                      | 1.09  | 0.78 | -1.12 | 0.1489 | -1.25 | 0.001  | -1.18 | 0.0123 | -1.65 | 0.0001 |
| 94488_at   | 1415722_a_at | 1110059P08Rik | RIKEN cDNA 1110059P08 gene                       | 1.09  | 0.35 | 1.19  | 0.0425 | 1.14  | 0.173  | 1.23  | 0.0088 | -1.15 | 0.2259 |
| 94489_at   | 1438657_x_at | Ptp4a1        | protein tyrosine phosphatase 4a1                 | 1.42  | 0.12 | 1.31  | 0.0013 | -1.01 | 0.8519 | 1.3   | 0.0005 | 2.14  | 0.001  |
| 94490_at   | 1451102_at   | Cnot8         | CCR4-NOT transcription complex, subunit 8        | 1.21  | 0.35 | -1.13 | 0.1807 | -1.09 | 0.3152 | -1.24 | 0.0124 | -1.04 | 0.7874 |
| 94491_at   | 1422471_at   | Pex13         | peroxisomal biogenesis factor 13                 | -1.87 | 0.05 | -1.09 | 0.3366 | -1.22 | 0.0422 | -1.23 | 0.0248 | -1.13 | 0.3017 |
| 94493_at   | 1460569_x_at | Cldn3         | claudin 3                                        | 1.26  | 0.21 | -1.36 | 0.0013 | -1.32 | 0.0074 | -1.44 | 0.0002 | -1.07 | 0.5824 |
| 94499_at   | 1433654_at   | Mgea5         | meningioma expressed antigen 5 (hyaluronin       | 1.12  | 0.56 | 1.19  | 0.116  | 1.11  | 0.341  | 1.09  | 0.2425 | -1.12 | 0.1359 |
| 94501_at   | 1420822_s_at | Sgpp1         | sphingosine-1-phosphate phosphatase 1            | 1.1   | 0.59 | 1.1   | 0.1208 | 1.03  | 0.7681 | 1.15  | 0.0988 | -1.07 | 0.6884 |
| 94502_at   | 1448295_at   | D13Wsu50e     | DNA segment, Chr 13, Wayne State Univer          | 2.29  | 0.02 | 1.3   | 0.0043 | 1.17  | 0.1976 | 1.43  | 0      | 1.26  | 0.1686 |
| 94504_at   | 1450410_a_at | 4930570C03Rik | RIKEN cDNA 4930570C03 gene                       | -1.22 | 0.27 | -1.05 | 0.6177 | -1.08 | 0.4837 | -1.14 | 0.0958 | 1.23  | 0.4893 |
| 94505_at   | 1417371_at   | Peli1         | pellino 1                                        | 1.52  | 0.41 | 1.29  | 0.0476 | 1.18  | 0.1679 | 1.43  | 0.0001 | 1.26  | 0.0816 |
| 94506_at   | 1417681_at   | Cpsf5         | cleavage and polyadenylation specific factor     | 1.73  | 0.17 | -1.03 | 0.7725 | 1.17  | 0.2187 | 1.18  | 0.0766 | 2.13  | 0.0935 |
| 94507_at   | 1423883_at   | Acsl1         | Acyl-CoA synthetase long-chain family mem        | -1.34 | 0.09 | 1.26  | 0.1069 | 1.34  | 0.0223 | 1.24  | 0.135  | -1.14 | 0.2003 |
| 94508_at   | 1451000_at   | 1810020E01Rik | RIKEN cDNA 1810020E01 gene                       | 1.23  | 0.15 | 1.04  | 0.3375 | 1     | 0.9333 | 1.02  | 0.7551 | -1.1  | 0.3715 |
| 94509_at   | 1423046_s_at | Ncbp2         | nuclear cap binding protein subunit 2            | 1.35  | 0.16 | -1.02 | 0.863  | 1     | 0.9933 | -1.08 | 0.4166 | -1.31 | 0.3487 |
| 94510_at   | 1422844_a_at | 2610312E17Rik | RIKEN cDNA 2610312E17 gene                       | -1.05 | 0.82 | 1.25  | 0.0259 | 1.42  | 0.032  | 1.42  | 0.0085 | -1.04 | 0.5957 |
| 94511_at   | 1448843_at   | Ssr1          | signal sequence receptor, alpha                  | -1.1  | 0.72 | -1.52 | 0.0032 | -1.36 | 0.0169 | -1.66 | 0.0001 | -2.9  | 0.1281 |
| 94514_s_at | 1451089_a_at | Arcn1         | archain 1                                        | -1.26 | 0.03 | 1.05  | 0.4876 | 1.11  | 0.0466 | 1.16  | 0.0426 | -1.06 | 0.3306 |
| 94515_at   | 1420641_a_at | Sqrdl         | sulfide quinone reductase-like (yeast)           | 1.54  | 0.13 | 1.09  | 0.2423 | -1.05 | 0.6935 | -1.01 | 0.8993 | -1.13 | 0.2883 |
| 94517_r_at | 1427038_at   | Penk1         | preproenkephalin 1                               | 1.2   | 0.63 | -1.39 | 0.2357 | -1.17 | 0.5523 | -1.43 | 0.1814 | 1.47  | 0.3133 |
| 94518_at   | 1416245_at   | 0610033H09Rik | RIKEN cDNA 0610033H09 gene                       | 1.71  | 0.06 | -1.11 | 0.0657 | -1.11 | 0.1512 | -1.1  | 0.2031 | -1.28 | 0.0824 |
| 94521_at   | 1416253_at   | Cdkn2d        | cyclin-dependent kinase inhibitor 2D (p19, ir    | 1.66  | 0.17 | 1.29  | 0.3608 | -1.31 | 0.0105 | 1.13  | 0.6145 | 1.11  | 0.8289 |
| 94522_at   | 1416247_at   | Dctn3         | dynactin 3                                       | 1.07  | 0.83 | -1.07 | 0.077  | -1.07 | 0.4099 | -1.06 | 0.1126 | -1.09 | 0.5054 |
| 94524_at   | 1450848_at   | Dap3          | death associated protein 3                       | 2.29  | 0.01 | 1.08  | 0.3609 | -1.01 | 0.964  | 1.16  | 0.1165 | -1.31 | 0.4228 |
| 94526_at   | 1416850_s_at | D10Ert214e    | DNA segment, Chr 10, ERATO Doi 214, exp          | 1.25  | 0.18 | 1.05  | 0.5876 | 1.24  | 0.0528 | 1.1   | 0.4539 | 1.35  | 0.0375 |
| 94528_at   | 1418905_at   | Nubp1         | nucleotide binding protein 1                     | -1.07 | 0.59 | -1.01 | 0.8957 | 1.13  | 0.0688 | 1.07  | 0.2468 | -1.23 | 0.1401 |
| 94530_at   | 1451136_a_at | Eif2b2        | eukaryotic translation initiation factor 2B, sul | -1.34 | 0.17 | 1     | 0.9633 | 1.02  | 0.8145 | -1.02 | 0.8622 | 1.02  | 0.8676 |
| 94531_at   | 1428134_at   | 2310005O14Rik | RIKEN cDNA 2310005O14 gene                       | 1.46  | 0.1  | 1.26  | 0.0126 | 1.21  | 0.0032 | 1.22  | 0.0072 | 1.06  | 0.5098 |
| 94534_at   | 1422501_s_at | ldh3a         | isocitrate dehydrogenase 3 (NAD+) alpha          | 1.41  | 0.19 | 1.05  | 0.6002 | 1.06  | 0.4697 | 1.08  | 0.3941 | -1.02 | 0.9275 |
| 94535_at   | 1450054_at   | ---           | ---                                              | -1.8  | 0.49 | 1.19  | 0.0964 | 1.03  | 0.6743 | 1.15  | 0.1541 | 1.04  | 0.7368 |
| 94536_s_at | 1420820_at   | 2900073G15Rik | RIKEN cDNA 2900073G15 gene                       | 1.35  | 0.25 | 1.1   | 0.1112 | 1.05  | 0.314  | 1.22  | 0.0003 | 1.27  | 0.1748 |
| 94537_at   | 1428608_at   | Mylc2b        | myosin light chain, regulatory B                 | -1.18 | 0.26 | -1.27 | 0.3467 | 1.07  | 0.7696 | -1.2  | 0.4964 | -1.41 | 0.1523 |
| 94540_at   | 1448683_at   | Cyp2d26       | cytochrome P450, family 2, subfamily d, poly     | 1.36  | 0.12 | 1.14  | 0.0086 | 1.08  | 0.0776 | 1.17  | 0.0003 | 1.34  | 0.0055 |
| 94543_at   | 1424087_at   | 1810042K04Rik | RIKEN cDNA 1810042K04 gene                       | -1.26 | 0.7  | -1.22 | 0.3386 | -1.11 | 0.5382 | -1.55 | 0.0621 | -1.53 | 0.2961 |
| 94548_at   | 1451247_at   | Mfsd1         | major facilitator superfamily domain containi    | -1.1  | 0.59 | -1.13 | 0.0764 | -1.08 | 0.3737 | -1.36 | 0.0001 | -1.52 | 0.0049 |
| 94549_at   | 1424129_at   | Mfsd1         | major facilitator superfamily domain containi    | 1.16  | 0.49 | -1.16 | 0.0289 | -1.15 | 0.0421 | -1.36 | 0.0005 | 1.04  | 0.8089 |
| 94550_at   | 1416260_a_at | Snx1          | sorting nexin 1                                  | -1.21 | 0.41 | -1.02 | 0.8976 | -1.08 | 0.2463 | -1.08 | 0.4325 | -1.19 | 0.5288 |
| 94551_at   | 1424102_at   | Appg4b        | APG4 (ATG4) autophagy-related homolog B          | -1.12 | 0.45 | -1.2  | 0.0853 | -1.04 | 0.6181 | -1.13 | 0.1605 | 1.12  | 0.3456 |
| 94552_at   | 1448642_at   | Pcbp1         | poly(rC) binding protein 1                       | -1.11 | 0.64 | -1.05 | 0.3488 | 1.12  | 0.0596 | 1.01  | 0.8038 | -1.24 | 0.0345 |
| 94554_at   | 1448999_at   | Trappc5       | trafficking protein particle complex 5           | 3.54  | 0.01 | 1.24  | 0.2436 | 1.09  | 0.699  | 1.39  | 0.1012 | 1.17  | 0.5659 |
| 94555_at   | 1430527_a_at | Rnf167        | ring finger protein 167                          | 1.15  | 0.55 | -1.07 | 0.3115 | -1.03 | 0.8028 | -1.2  | 0.0028 | 1.14  | 0.5917 |
| 94556_at   | 1431055_a_at | Snx10         | sorting nexin 10                                 | -1.35 | 0.11 | -1.16 | 0.3564 | -1.12 | 0.2702 | -1.09 | 0.6306 | -1.3  | 0.0445 |
| 94558_g_at | 1427027_a_at | Gtf3a         | general transcription factor III A               | 1.21  | 0.29 | 1.01  | 0.9022 | 1.04  | 0.5138 | 1.03  | 0.6273 | 1.28  | 0.0975 |

|            |              |               |                                                |       |      |       |        |       |        |       |        |       |        |
|------------|--------------|---------------|------------------------------------------------|-------|------|-------|--------|-------|--------|-------|--------|-------|--------|
| 94561_at   | 1422499_at   | D15Erd366e    | DNA segment, Chr 15, ERATO Doi 366, exp        | 1.13  | 0.57 | 1.14  | 0.3453 | 1.09  | 0.4215 | -1.25 | 0.141  | 1.13  | 0.3636 |
| 94562_at   | 1417456_at   | Gnpat         | glyceronephosphate O-acyltransferase           | 1.08  | 0.62 | -1.07 | 0.218  | -1    | 0.9403 | -1.07 | 0.3224 | -1.11 | 0.335  |
| 94563_at   | 1427440_a_at | Afnm          | afamin                                         | -1.35 | 0.19 | -1.25 | 0.0018 | 1.04  | 0.5976 | -1.51 | 0      | 1.29  | 0.0614 |
| 94564_at   | 1421606_a_at | Sult4a1       | sulfotransferase family 4A, member 1           | 2.26  | 0.01 | -1.04 | 0.9123 | 1.24  | 0.442  | -1.28 | 0.3993 | 1.54  | 0.148  |
| 94565_at   | 1421678_at   | Itp2          | inositol 1,4,5-triphosphate receptor 2         | -3.41 | 0.21 | -1.13 | 0.6619 | -1.03 | 0.9075 | -1.24 | 0.4307 | 3.32  | 0.2574 |
| 94566_at   | 1421755_at   | Gpr132        | G protein-coupled receptor 132                 | -1.61 | 0.15 | -1.07 | 0.7531 | 1.04  | 0.8574 | -1.29 | 0.1859 | -1.2  | 0.5953 |
| 94571_at   | 1450558_at   | V1ra1         | vomeronal 1 receptor, A1                       | -1.71 | 0.52 | -1.26 | 0.5048 | -1.26 | 0.4883 | -1.37 | 0.33   | 2.31  | 0.1102 |
| 94618_at   | 1422267_at   | Foxb2         | forkhead box B2                                | -1.18 | 0.54 | -1.06 | 0.4767 | 1.23  | 0.0077 | 1     | 0.9876 | 1.09  | 0.6198 |
| 94619_at   | 1421569_at   | Grid1         | glutamate receptor, ionotropic, delta 1        | 1.35  | 0.38 | 1.02  | 0.8593 | 1.07  | 0.4929 | -1.05 | 0.6611 | 1.09  | 0.4826 |
| 94621_at   | 1450289_at   | Foxd2         | forkhead box D2                                | -1.86 | 0.03 | 1.13  | 0.271  | -1.02 | 0.8736 | 1.03  | 0.8261 | 1.55  | 0.0273 |
| 94622_at   | 1421530_a_at | Grm8          | glutamate receptor, metabotropic 8             | -1.21 | 0.57 | -1.16 | 0.3619 | -1.01 | 0.941  | -1.1  | 0.6893 | -1.2  | 0.378  |
| 94623_at   | 1421699_at   | Enam          | enamelin                                       | -1.09 | 0.58 | 1.08  | 0.6882 | 1.18  | 0.3517 | 1.07  | 0.5959 | 1.28  | 0.371  |
| 94625_at   | 1420797_at   | Otog          | otogelin                                       | 1.15  | 0.43 | 1.26  | 0.3179 | 1.2   | 0.4937 | 1.4   | 0.1177 | 1.49  | 0.3761 |
| 94626_at   | 1421580_at   | Cntnap1       | contactin associated protein 1                 | -1.38 | 0.35 | -1.25 | 0.0944 | -1.09 | 0.4415 | -1.13 | 0.3517 | 1.09  | 0.7535 |
| 94627_at   | 1450369_at   | Figla         | factor in the germline alpha                   | 1.64  | 0.21 | 1.03  | 0.9127 | -1.92 | 0.0512 | -1.03 | 0.9119 | 1.47  | 0.2684 |
| 94628_r_at | 1424063_at   | Abpa          | androgen binding protein alpha                 | -2.43 | 0.02 | -1.34 | 0.3338 | -1.08 | 0.7219 | -1.4  | 0.2142 | 1.44  | 0.3722 |
| 94630_at   | 1421643_at   | Zfpn1a2       | zinc finger protein, subfamily 1A, 2 (Helios)  | -1.86 | 0.34 | -1.02 | 0.9705 | 1.29  | 0.4465 | 1.26  | 0.4456 | -1.22 | 0.6877 |
| 94631_at   | 1450327_at   | P2rx1         | purinergic receptor P2X-like 1, orphan recep   | 2.46  | 0.16 | 1.35  | 0.3631 | -1.03 | 0.8906 | 1.04  | 0.8578 | 1.07  | 0.519  |
| 94632_at   | 1449320_at   | Pbsn          | probasin                                       | 1.28  | 0.68 | -1.19 | 0.3771 | 1.08  | 0.6936 | -1    | 0.9803 | 1.39  | 0.687  |
| 94634_at   | 1422234_at   | Tacr2         | tachykinin receptor 2                          | -1.75 | 0.15 | -1.08 | 0.7728 | -1.05 | 0.8429 | -1.16 | 0.5699 | -1.84 | 0.1435 |
| 94635_at   | 1422282_at   | Tacr1         | tachykinin receptor 1                          | -1.08 | 0.46 | -1.35 | 0.0721 | -1.1  | 0.5759 | -1.48 | 0.0169 | -1.27 | 0.5468 |
| 94636_at   | 1422336_at   | Hoxa13        | homeo box A13                                  | -1.19 | 0.7  | -1.06 | 0.7255 | 1.26  | 0.3441 | 1.12  | 0.6148 | -1.44 | 0.5237 |
| 94637_at   | 1427586_at   | Sema4b        | sema domain, immunoglobulin domain (Ig),       | -1.33 | 0.13 | 1.26  | 0.2629 | 1.26  | 0.2058 | 1.28  | 0.1905 | 1.27  | 0.2876 |
| 94639_at   | 1422427_a_at | Svs2          | seminal vesicle protein, secretion 2           | -1.47 | 0.54 | -1.01 | 0.9643 | 1.96  | 0.1494 | 1.28  | 0.5508 | 1.56  | 0.5257 |
| 94640_at   | 1427618_at   | Cdh9          | cadherin 9                                     | -1.29 | 0.64 | 1.01  | 0.9704 | 1.78  | 0.057  | 1.03  | 0.9382 | 2.18  | 0.069  |
| 94642_at   | 1421742_at   | Gdi2          | guanosine diphosphate (GDP) dissociation i     | -2.33 | 0.06 | 1.19  | 0.4739 | -1.23 | 0.3092 | 1.2   | 0.4002 | 1.24  | 0.3027 |
| 94643_at   | 1450295_s_at | Pvr           | poliovirus receptor                            | -1.69 | 0.35 | -1.08 | 0.7575 | -1.12 | 0.654  | 1.15  | 0.5899 | 1.81  | 0.0766 |
| 94644_at   | 1421218_at   | Bche          | butyrylcholinesterase                          | -2.44 | 0.04 | 1.19  | 0.3408 | -1.01 | 0.9271 | 1.13  | 0.494  | 1.53  | 0.0525 |
| 94645_at   | 1421263_at   | Gabra3        | gamma-aminobutyric acid (GABA-A) recepto       | -1.22 | 0.74 | -1.71 | 0.178  | -1.52 | 0.2755 | -1.24 | 0.5408 | -1.27 | 0.6797 |
| 94662_at   | 1456706_at   | 4833441D16Rik | RIKEN cDNA 4833441D16 gene                     | -1.72 | 0.19 | 1.36  | 0.0466 | 1.32  | 0.038  | 1.08  | 0.7026 | 1.84  | 0.3218 |
| 94663_at   | 1440874_at   | Slco5a1       | solute carrier organic anion transporter famil | -2.19 | 0.31 | -1.39 | 0.1137 | -1.25 | 0.2107 | -1.35 | 0.1429 | 1.53  | 0.2358 |
| 94664_at   | 1437672_at   | Irs3          | insulin receptor substrate 3                   | -2.76 | 0.19 | 1.02  | 0.9526 | 1.35  | 0.4789 | -1.56 | 0.2474 | -1.15 | 0.8327 |
| 94667_at   | 1459478_at   | AA408396      | expressed sequence AA408396                    | -2.06 | 0.15 | -1.14 | 0.5323 | -1.16 | 0.4852 | -1.35 | 0.1696 | 1.74  | 0.2957 |
| 94668_at   | 1446856_at   | D3Wsu167e     | DNA segment, Chr 3, Wayne State Universi       | 1.04  | 0.93 | 1.16  | 0.6761 | 1.09  | 0.7083 | 1.37  | 0.246  | 1.01  | 0.9751 |
| 94683_at   | 1419785_at   | AA516738      | expressed sequence AA516738                    | -1.08 | 0.76 | -1.26 | 0.4632 | 1.11  | 0.7378 | -1.2  | 0.5144 | 1.44  | 0.4856 |
| 94684_at   | 1449598_at   | Denr          | Density-regulated protein                      | -2.13 | 0.18 | -1.22 | 0.3801 | 1.04  | 0.8457 | 1.17  | 0.4555 | 2     | 0.1756 |
| 94685_at   | 1419775_at   | ---           | ---                                            | -2.39 | 0.27 | 1.11  | 0.4221 | 1.15  | 0.2096 | 1.03  | 0.7823 | -1.74 | 0.3276 |
| 94686_at   | 1448078_at   | C76533        | expressed sequence C76533                      | 1.14  | 0.74 | -1.39 | 0.0781 | -1.58 | 0.0253 | -1.72 | 0.0243 | 1.93  | 0.2173 |
| 94688_at   | 1422002_at   | Mad           | Max dimerization protein                       | -1.22 | 0.34 | 1.33  | 0.1436 | 1.22  | 0.1474 | 1.3   | 0.042  | 1.45  | 0.2767 |
| 94689_at   | 1446148_x_at | C79248        | expressed sequence C79248                      | 1.79  | 0.44 | 1.14  | 0.4359 | -1.81 | 0.0068 | 1.04  | 0.8682 | 1.65  | 0.1095 |
| 94690_at   | 1449595_at   | C79490        | expressed sequence C79490                      | -1.82 | 0.09 | 1.04  | 0.7452 | 1.06  | 0.712  | -1.03 | 0.8007 | -1.51 | 0.5484 |
| 94692_at   | 1420698_at   | Gpx5          | glutathione peroxidase 5                       | 1.67  | 0.29 | 1.04  | 0.8616 | 1.07  | 0.8105 | 1.1   | 0.6906 | 1.41  | 0.2618 |
| 94693_at   | 1442529_at   | Ogfr1         | Opioid growth factor receptor-like 1           | -1.13 | 0.83 | -1.22 | 0.5345 | -1.36 | 0.3038 | -1.66 | 0.1601 | -1.47 | 0.2907 |
| 94694_at   | 1421396_at   | Pcsk1         | proprotein convertase subtilisin/kexin type 1  | -3.07 | 0.18 | -1.14 | 0.6887 | 1.14  | 0.6625 | -1.34 | 0.4304 | 2.52  | 0.0989 |
| 94695_at   | 1441013_at   | C81521        | expressed sequence C81521                      | -1.26 | 0.2  | 2.02  | 0.0016 | 1.55  | 0.0177 | 2.29  | 0      | 1.19  | 0.3748 |
| 94696_at   | 1421655_a_at | Ccr4          | chemokine (C-C motif) receptor 4               | -2.98 | 0.19 | -1.01 | 0.9249 | 1.18  | 0.294  | 1.15  | 0.6271 | 1.59  | 0.0176 |
| 94697_at   | 1419526_at   | Fgr           | Gardner-Rasheed feline sarcoma viral (Fgr)     | -1.7  | 0.16 | 1.34  | 0.0686 | 1.34  | 0.0262 | 1.39  | 0.0801 | 1.65  | 0.0106 |
| 94698_at   | 1422024_at   | Fli1          | Friend leukemia integration 1                  | -2.86 | 0.04 | 1.04  | 0.8135 | -1.28 | 0.2357 | -1.25 | 0.2817 | 2.04  | 0.001  |
| 94699_at   | 1421771_a_at | Ipp           | IAP promoted placental gene                    | -1.01 | 0.93 | -1.12 | 0.2611 | 1.03  | 0.8061 | -1.1  | 0.2188 | -1.02 | 0.9425 |
| 94700_at   | 1418549_at   | Cga           | glycoprotein hormones, alpha subunit           | 1.02  | 0.97 | -1.18 | 0.6484 | 1.21  | 0.5875 | 1.45  | 0.1062 | 1.08  | 0.8374 |
| 94701_at   | 1419740_at   | Pde6b         | phosphodiesterase 6B, cGMP, rod receptor,      | 1.26  | 0.76 | -1.02 | 0.9159 | 1.16  | 0.6485 | -1.11 | 0.5385 | 1.31  | 0.3625 |
| 94702_at   | 1422019_at   | ---           | ---                                            | -1.54 | 0.65 | 1.25  | 0.353  | 1.26  | 0.5633 | 1.16  | 0.7745 | 3.2   | 0.0658 |
| 94703_at   | 1427154_at   | Krt2-17       | keratin complex 2, basic, gene 17              | 1.37  | 0.01 | -1.06 | 0.857  | -1.12 | 0.7137 | 1.21  | 0.6432 | 1.21  | 0.735  |



|            |              |                  |                                                   |       |      |       |        |       |        |       |        |        |        |
|------------|--------------|------------------|---------------------------------------------------|-------|------|-------|--------|-------|--------|-------|--------|--------|--------|
| 94704_at   | 1419015_at   | Wisp2            | WNT1 inducible signaling pathway protein 2        | -2.73 | 0.04 | 1.27  | 0.4086 | 1.71  | 0.0916 | 1.39  | 0.282  | 1.04   | 0.8938 |
| 94705_at   | 1421727_at   | Eya1             | eyes absent 1 homolog (Drosophila)                | -2    | 0.29 | -1.95 | 0.0994 | -1.43 | 0.3775 | -2.67 | 0.0352 | -1.99  | 0.1025 |
| 94707_s_at | 1451686_x_at | Amelx            | amelogenin X chromosome                           | -1.73 | 0.22 | 1.04  | 0.6257 | -1.12 | 0.3832 | 1.01  | 0.9574 | -1.17  | 0.704  |
| 94708_at   | 1425724_at   | Ptpn2            | protein tyrosine phosphatase, receptor type,      | -1.25 | 0.55 | -1.49 | 0.0752 | 1.09  | 0.6232 | -1.3  | 0.2063 | 1.63   | 0.0861 |
| 94710_g_at | 1420455_at   | Gcm2             | glial cells missing homolog 2 (Drosophila)        | -1.09 | 0.78 | 1.32  | 0.4837 | -1.13 | 0.7171 | 1.32  | 0.4903 | -1.33  | 0.6207 |
| 94711_at   | 1420601_at   | Gcm1             | glial cells missing homolog 1 (Drosophila)        | -3.94 | 0.28 | 2.52  | 0.0134 | 1.82  | 0.0746 | 2.05  | 0.1321 | 1.67   | 0.0988 |
| 94712_at   | 1419417_at   | Vegfc            | vascular endothelial growth factor C              | 2.31  | 0.09 | -1    | 0.9958 | 1.03  | 0.9473 | 1.02  | 0.9459 | -2.76  | 0.0336 |
| 94713_at   | 1421385_a_at | Myo7a            | myosin VIIa                                       | 1.18  | 0.34 | 1.04  | 0.6747 | 1.15  | 0.1438 | 1.12  | 0.0958 | 1.28   | 0.1124 |
| 94714_at   | 1427380_at   | Ngfg             | nerve growth factor, gamma                        | 1.54  | 0.31 | 1.21  | 0.5864 | -1.25 | 0.373  | -1.14 | 0.6135 | 1.67   | 0.1007 |
| 94715_at   | 1422217_a_at | Cyp1a1           | cytochrome P450, family 1, subfamily a, poly      | 1.22  | 0.72 | 1.42  | 0.0173 | 1.17  | 0.3731 | 1.43  | 0.0437 | 1.31   | 0.5174 |
| 94717_f_at | 1423028_at   | Ifna2            | interferon alpha family, gene 2                   | -1.79 | 0.04 | -2.11 | 0.0003 | -1.3  | 0.0517 | -3.23 | 0      | -1.08  | 0.8213 |
| 94718_at   | 1422398_at   | Hist1h1e         | histone 1, H1e                                    | -1.26 | 0.36 | 1.06  | 0.3731 | 1.1   | 0.2116 | -1.03 | 0.7531 | 1.36   | 0.2525 |
| 94719_at   | 1421568_at   | Kcna6            | potassium voltage-gated channel, shaker-re        | -1.35 | 0.21 | 1.08  | 0.8259 | 1.26  | 0.2298 | 1.46  | 0.2173 | 1.18   | 0.3892 |
| 94720_at   | 1422027_a_at | Ets1             | E26 avian leukemia oncogene 1, 5' domain          | 1.25  | 0.35 | 1     | 0.9905 | -1.04 | 0.8381 | -1.01 | 0.9522 | -1.35  | 0.2619 |
| 94721_at   | 1422246_at   | Dspp             | dentin sialophosphoprotein                        | 2.22  | 0.04 | -1.04 | 0.9169 | -1.05 | 0.8736 | -1.18 | 0.6743 | 2.01   | 0.4209 |
| 94723_at   | 1421758_at   | Nat1             | N-acetyltransferase 1 (arylamine N-acetyltra      | 1.11  | 0.84 | -1.18 | 0.2125 | -1.38 | 0.1116 | -1.21 | 0.2456 | -1.31  | 0.1963 |
| 94724_at   | 1420450_at   | Mmp10            | matrix metalloproteinase 10                       | -2.5  | 0.22 | -1.07 | 0.714  | -1.32 | 0.205  | -1.98 | 0.0143 | 1.32   | 0.5806 |
| 94727_f_at | 1420729_at   | MGI:1933437      | 2-cell-stage, variable group, member 1            | 1.32  | 0.42 | -1.41 | 0.1261 | -1.28 | 0.3104 | -1.36 | 0.2027 | 1.17   | 0.1657 |
| 94729_r_at | 1422352_at   | Mcpt1            | mast cell protease 1                              | -1.2  | 0.6  | 1.67  | 0.1241 | 1.94  | 0.0042 | 1.39  | 0.0655 | -1.55  | 0.0864 |
| 94730_at   | 1449838_at   | Crisp3           | cysteine-rich secretory protein 3                 | -1.05 | 0.9  | 1.29  | 0.5184 | 1.02  | 0.9422 | 1.35  | 0.4633 | 2.36   | 0.1144 |
| 94731_at   | 1418957_at   | Stac             | src homology three (SH3) and cysteine rich        | -1.39 | 0.5  | -1.11 | 0.4882 | 1.2   | 0.2215 | -1.2  | 0.3185 | 1.2    | 0.4661 |
| 94732_at   | 1420431_at   | Rptn             | repetin                                           | 1.1   | 0.72 | -1.93 | 0.0139 | -1.23 | 0.4759 | -1.14 | 0.4199 | -1.55  | 0.1898 |
| 94733_at   | 1449818_at   | Abcb4            | ATP-binding cassette, sub-family B (MDR/T,        | -1.01 | 0.95 | -1.43 | 0.0014 | 1.05  | 0.6104 | -1.37 | 0.0017 | -1.77  | 0.0081 |
| 94734_at   | 1420438_at   | Orm2             | orosomucoid 2                                     | 4.96  | 0.09 | 3.7   | 0.1175 | 2.83  | 0.002  | 5.89  | 0.0211 | -16.98 | 0.2589 |
| 94736_at   | 1421384_at   | Lyst             | lysosomal trafficking regulator                   | -4.39 | 0    | 1.13  | 0.5912 | 1.2   | 0.3845 | 1.15  | 0.3857 | 1.04   | 0.9446 |
| 94737_at   | 1418754_at   | Adcy8            | adenylate cyclase 8                               | -1.61 | 0.23 | 1.17  | 0.3016 | 1.11  | 0.3961 | -1.1  | 0.5485 | 1.21   | 0.4614 |
| 94738_s_at | 1420598_x_at | Defcr-rs2        | defensin related cryptdin, related sequence :     | -1.69 | 0.07 | 1.12  | 0.3005 | -1.05 | 0.5144 | 1.11  | 0.3993 | 2.35   | 0.1391 |
| 94740_g_at | 1421095_a_at | Trpc1            | transient receptor potential cation channel, s    | -2.2  | 0.48 | -1.42 | 0.0063 | -1.27 | 0.0501 | -1.58 | 0.0192 | 1.16   | 0.6819 |
| 94741_at   | 1432486_a_at | Tesp2            | testicular serine protease 2                      | 1     | 1    | -1.73 | 0.1161 | -1.22 | 0.5918 | -1.17 | 0.688  | 1.36   | 0.4871 |
| 94743_f_at | 1425999_at   | Cfh              | complement component factor h                     | -1.66 | 0.01 | 1.01  | 0.873  | -1.02 | 0.8464 | 1.06  | 0.2684 | -1.31  | 0.0327 |
| 94744_at   | 1422067_at   | Klrb1d           | killer cell lectin-like receptor subfamily B me   | -1.39 | 0.31 | -1.2  | 0.3901 | -1.09 | 0.6888 | -1.11 | 0.5872 | 1.33   | 0.3924 |
| 94745_f_at | 1427479_at   | Eif1a /// LOC231 | eukaryotic translation initiation factor 1A /// s | -2.22 | 0.23 | 1.32  | 0.2125 | 1.53  | 0.0451 | 1.42  | 0.082  | -1.11  | 0.8894 |
| 94746_at   | 1422160_at   | H2-T24           | histocompatibility 2, T region locus 24           | -1.34 | 0.71 | -1.03 | 0.8933 | -1.16 | 0.436  | -1.42 | 0.1225 | -1     | 0.9844 |
| 94748_g_at | 1450200_s_at | Csf2rb1 /// Csf2 | colony stimulating factor 2 receptor, beta 1, l   | -6.55 | 0    | -1.17 | 0.3924 | -1.27 | 0.1076 | -1.59 | 0.0834 | -1.61  | 0.0119 |
| 94750_at   | 1449502_at   | Dazl             | deleted in azoospermia-like                       | -1.19 | 0.34 | 1.04  | 0.8309 | 1.32  | 0.4598 | -1.02 | 0.8712 | 2.24   | 0.0176 |
| 94752_s_at | 1422054_a_at | Skil             | SKI-like                                          | -1.1  | 0.71 | 1.08  | 0.5783 | 1.24  | 0.2026 | 1.18  | 0.265  | 1.19   | 0.2608 |
| 94753_at   | 1421302_a_at | Gna15            | guanine nucleotide binding protein, alpha 15      | -1.37 | 0.24 | 1.24  | 0.297  | 1.23  | 0.2447 | 1.2   | 0.4206 | -1.32  | 0.6537 |
| 94754_at   | 1427300_at   | Lhx8             | LIM homeobox protein 8                            | 1.28  | 0.6  | -1.51 | 0.1284 | -1.36 | 0.119  | -1.51 | 0.1055 | 1.01   | 0.9832 |
| 94755_at   | 1421473_at   | Il1a             | interleukin 1 alpha                               | -1.54 | 0.24 | -1.26 | 0.1697 | 1     | 0.9968 | -1.13 | 0.5515 | -1.34  | 0.387  |
| 94757_at   | 1420579_s_at | Cftr             | cystic fibrosis transmembrane conductance         | -1.67 | 0.19 | -1.08 | 0.4979 | -1.03 | 0.8453 | -1.13 | 0.1522 | 1.24   | 0.1451 |
| 94758_s_at | 1427767_a_at | Cftr             | cystic fibrosis transmembrane conductance         | 1.55  | 0.52 | 1.12  | 0.7551 | 1.37  | 0.4561 | 1.34  | 0.5052 | -2.48  | 0.1475 |
| 94759_at   | 1459914_at   | 2810402A17Rik    | RIKEN cDNA 2810402A17 gene                        | -1.82 | 0.5  | 1.11  | 0.7026 | 1.03  | 0.9058 | -1.05 | 0.8706 | 2.5    | 0.0911 |
| 94760_at   | 1419770_at   | ---              | ---                                               | 1.15  | 0.55 | -1.34 | 0.496  | -1.66 | 0.2434 | -1.27 | 0.6069 | -1.53  | 0.2144 |
| 94761_at   | 1421228_at   | Ccl7             | chemokine (C-C motif) ligand 7                    | 1.39  | 0.43 | 1.08  | 0.8001 | -1.58 | 0.1758 | 1.01  | 0.9851 | 1.89   | 0.1939 |
| 94762_at   | 1421407_at   | F2rl2            | coagulation factor II (thrombin) receptor-like    | 1.21  | 0.58 | -1.12 | 0.2872 | 1.1   | 0.414  | 1.1   | 0.3555 | 1.19   | 0.2498 |
| 94763_at   | 1450511_at   | Musk             | muscle, skeletal, receptor tyrosine kinase        | -1.63 | 0.14 | -1.2  | 0.4628 | -1.07 | 0.8215 | -1.19 | 0.4444 | -1.13  | 0.6677 |
| 94764_at   | 1425367_at   | Itgal            | integrin alpha L                                  | 1.19  | 0.77 | 1.4   | 0.1513 | 1.03  | 0.8666 | 1.46  | 0.2661 | -1.12  | 0.7016 |
| 94765_at   | 1433799_at   | Rdh13            | retinol dehydrogenase 13 (all-trans and 9-cis     | 1.79  | 0.43 | 1.87  | 0.0117 | 2.58  | 0.0055 | 2.52  | 0.0327 | -1.01  | 0.9844 |
| 94766_at   | 1424635_at   | Eef1a1           | eukaryotic translation elongation factor 1 alp    | 1.06  | 0.53 | 1.02  | 0.2089 | 1.08  | 0.0003 | 1.06  | 0.0128 | 1.29   | 0.0259 |
| 94767_at   | 1424000_a_at | Rps11            | ribosomal protein S11                             | -1    | 0.98 | 1.02  | 0.8951 | -1.06 | 0.6248 | 1.25  | 0.0611 | 1.38   | 0.0888 |
| 94768_at   | 1416161_at   | Rad21            | RAD21 homolog (S. pombe)                          | 1.06  | 0.76 | 1.12  | 0.0544 | 1.22  | 0.0139 | 1.14  | 0.0403 | 1.25   | 0.1133 |
| 94769_at   | 1449366_at   | ---              | ---                                               | -1.43 | 0.19 | 1.06  | 0.7586 | 1.18  | 0.4415 | 1.23  | 0.3056 | 1.2    | 0.5715 |
| 94770_at   | 1435573_at   | DXImx46e         | DNA segment, Chr X, Immunex 46, express           | 1.15  | 0.4  | -1.11 | 0.0967 | 1.02  | 0.7174 | -1.2  | 0.0053 | -1.03  | 0.7753 |

|            |              |               |                                                                                                                    |        |      |       |        |       |        |       |        |        |        |
|------------|--------------|---------------|--------------------------------------------------------------------------------------------------------------------|--------|------|-------|--------|-------|--------|-------|--------|--------|--------|
| 94772_at   | 1450296_at   | Klr1a         | killer cell lectin-like receptor subfamily B member 1                                                              | -2.74  | 0.22 | -2.17 | 0.0712 | -1.09 | 0.8056 | -1.73 | 0.1551 | 1.09   | 0.8059 |
| 94773_at   | 1450222_x_at | Ngfa          | nerve growth factor, alpha                                                                                         | -1.29  | 0.77 | -1.41 | 0.4701 | -1.51 | 0.4248 | -1.66 | 0.2851 | -2.18  | 0.2701 |
| 94774_at   | 1421551_s_at | Ifi202b       | interferon activated gene 202B                                                                                     | -8.26  | 0.1  | 2.26  | 0.2854 | -1.17 | 0.4392 | 2.75  | 0.2968 | -1.04  | 0.92   |
| 94775_at   | 1420556_at   | Oxt           | oxytocin                                                                                                           | -1.35  | 0.13 | 1.41  | 0.0307 | 1.13  | 0.4395 | 1.46  | 0.0057 | -1.11  | 0.5004 |
| 94777_at   | 1425260_at   | Alb1          | albumin 1                                                                                                          | -1.28  | 0.36 | -1.03 | 0.036  | -1.02 | 0.089  | -1.01 | 0.1966 | 1.37   | 0.0249 |
| 94778_at   | 1418601_at   | ---           | ---                                                                                                                | 1.43   | 0.3  | -1.07 | 0.5918 | -1.12 | 0.4629 | 1.02  | 0.9017 | -2.39  | 0.0007 |
| 94781_at   | 1452757_s_at | Hba-a1        | hemoglobin alpha, adult chain 1                                                                                    | 1.05   | 0.91 | -1.12 | 0.3843 | -1.7  | 0.0007 | -1.2  | 0.2025 | 1      | 0.9899 |
| 94782_at   | 1449596_at   | C78142        | expressed sequence C78142                                                                                          | -3.1   | 0.01 | 1.23  | 0.6258 | 2.14  | 0.2187 | -1.46 | 0.1964 | 1.92   | 0.1724 |
| 94783_at   | 1442948_at   | C79452        | expressed sequence C79452                                                                                          | -1.15  | 0.75 | 1.22  | 0.3049 | 1.32  | 0.2025 | 1.37  | 0.2072 | 1.21   | 0.4067 |
| 94784_at   | 1434850_at   | D030034H08    | Hypothetical protein D030034H08                                                                                    | -1.44  | 0.32 | 1.08  | 0.4863 | 1.03  | 0.8237 | 1.05  | 0.6029 | -1.15  | 0.3989 |
| 94785_at   | 1447957_at   | D7Ertd128e    | DNA segment, Chr 7, ERATO Doi 128, expressed sequence C79452                                                       | -3.32  | 0.18 | -1.52 | 0.1895 | -1.28 | 0.4042 | -1.16 | 0.6146 | 1.49   | 0.2543 |
| 94786_at   | 1443605_at   | C81272        | expressed sequence C81272                                                                                          | -1.13  | 0.7  | -1.47 | 0.1124 | 1     | 0.9842 | -1.3  | 0.2476 | 1.42   | 0.1199 |
| 94787_at   | 1447952_at   | C77140        | expressed sequence C77140                                                                                          | 1.8    | 0.17 | -1.09 | 0.2496 | -1.17 | 0.1075 | -1.15 | 0.1662 | 1.64   | 0.1091 |
| 94789_r_at | 1416256_a_at | Tubb5         | tubulin, beta 5                                                                                                    | -1.01  | 0.96 | 1.3   | 0.0344 | 1.26  | 0.1099 | 1.45  | 0.0099 | 1.33   | 0.3643 |
| 94791_s_at | 1460300_a_at | Ltk           | leukocyte tyrosine kinase                                                                                          | -1.49  | 0.02 | -1.14 | 0.0982 | 1.05  | 0.3988 | -1.11 | 0.1079 | -1.07  | 0.6251 |
| 94792_at   | 1448061_at   | Msr1          | Macrophage scavenger receptor 1                                                                                    | 1.18   | 0.22 | 1.09  | 0.6946 | -1.06 | 0.6448 | 1.34  | 0.1584 | 1.1    | 0.1769 |
| 94793_at   | 1455511_at   | Seps1         | selenophosphate synthetase 1                                                                                       | 1.49   | 0.49 | 1.03  | 0.8948 | 1.54  | 0.3021 | 1.13  | 0.4926 | 1.31   | 0.4544 |
| 94794_at   | 1448771_a_at | Fth1          | ferritin heavy chain 1                                                                                             | 1.43   | 0.1  | 1.2   | 0.0003 | 1.09  | 0.0296 | 1.21  | 0.0008 | 1.06   | 0.4715 |
| 94795_at   | 1420531_at   | Hsd3b5        | hydroxysteroid dehydrogenase-5, delta<5>-; expressed sequence C77140                                               | -19.65 | 0.01 | -1.61 | 0.0073 | -1.02 | 0.8818 | -1.68 | 0.0162 | -67.67 | 0.0036 |
| 94796_at   | 1440253_at   | ---           | ---                                                                                                                | -1.21  | 0.35 | 1.02  | 0.718  | 1.07  | 0.289  | -1.06 | 0.2605 | -1.4   | 0.1453 |
| 94797_at   | 1451239_a_at | Slc26a1       | solute carrier family 26 (sulfate transporter), ATP-binding cassette, sub-family B (MDR/T, coagulation factor VIII | 1.76   | 0.13 | -1.54 | 0      | -1.25 | 0.0914 | -1.4  | 0.0001 | -1.6   | 0.0446 |
| 94798_at   | 1449594_at   | Abcb1b        | ATP-binding cassette, sub-family B (MDR/T, coagulation factor VIII                                                 | 2.25   | 0.22 | 1.21  | 0.5971 | 1.13  | 0.7554 | 1.33  | 0.4207 | 1.24   | 0.4161 |
| 94799_at   | 1449558_at   | F8            | coagulation factor VIII                                                                                            | 1.56   | 0.15 | 1.02  | 0.8518 | 1.23  | 0.0769 | -1.11 | 0.5422 | 1.34   | 0.1889 |
| 94800_at   | 1419772_at   | Mllt10        | Myeloid/lymphoid or mixed lineage-leukemia                                                                         | -1.23  | 0.71 | 1.37  | 0.1159 | 1.3   | 0.278  | 1.14  | 0.632  | 1.59   | 0.1545 |
| 94801_at   | 1452882_at   | Pgrmc2        | progesterone receptor membrane component 2                                                                         | 1.37   | 0.46 | -1.41 | 0      | -1.02 | 0.8294 | -1.4  | 0.0002 | -2.17  | 0.0185 |
| 94803_at   | 1449542_at   | Pbx1          | pre B-cell leukemia transcription factor 1                                                                         | -1.18  | 0.19 | 1.12  | 0.3955 | -1.04 | 0.758  | 1.04  | 0.6969 | 2.71   | 0.0237 |
| 94804_at   | 1425383_a_at | Pbx1          | pre B-cell leukemia transcription factor 1                                                                         | 1.33   | 0.35 | -1.09 | 0.3827 | -1.14 | 0.0629 | -1.16 | 0.0887 | 1.23   | 0.2228 |
| 94806_at   | 1416090_at   | Pdhb          | pyruvate dehydrogenase (lipoamide) beta                                                                            | 1.62   | 0.01 | -1.26 | 0.0029 | 1.12  | 0.1416 | -1.17 | 0.077  | -1.65  | 0.0032 |
| 94810_at   | 1436884_x_at | ---           | ---                                                                                                                | -1.12  | 0.46 | 1.17  | 0.0268 | 1.17  | 0.1749 | 1.29  | 0.0054 | 1.26   | 0.0684 |
| 94813_at   | 1416855_at   | Gas1          | growth arrest specific 1                                                                                           | 1.12   | 0.57 | -1.5  | 0.1463 | -1.11 | 0.5718 | -1.56 | 0.0327 | 1.03   | 0.8386 |
| 94814_at   | 1428645_at   | Gnai3         | guanine nucleotide binding protein, alpha inhibitory 3                                                             | -1.96  | 0.07 | -1.04 | 0.7073 | 1.19  | 0.0243 | -1.18 | 0.0667 | -1.14  | 0.502  |
| 94815_at   | 1415865_s_at | Bpgm          | 2,3-bisphosphoglycerate mutase                                                                                     | 1.29   | 0.27 | -1.23 | 0.2798 | -1.06 | 0.6884 | -1.17 | 0.2567 | -3.13  | 0.0008 |
| 94817_at   | 1450843_a_at | Serpinh1      | serine (or cysteine) proteinase inhibitor, clade B, member 1                                                       | -1.03  | 0.91 | 1.05  | 0.7447 | -1.17 | 0.4077 | -1.18 | 0.319  | 1.57   | 0.3249 |
| 94818_at   | 1460631_at   | Ogt           | O-linked N-acetylglucosamine (GlcNAc) transferase                                                                  | -1.03  | 0.84 | 1.5   | 0.0035 | 1.3   | 0.2051 | 1.86  | 0      | 1.62   | 0.0142 |
| 94820_r_at | 1448334_a_at | Ccni          | cyclin I                                                                                                           | -1.16  | 0.46 | 1.16  | 0.4646 | -1.12 | 0.5112 | 1     | 0.9925 | -1.42  | 0.0835 |
| 94821_at   | 1420886_a_at | Xbp1          | X-box binding protein 1                                                                                            | -1.19  | 0.49 | -1.14 | 0.1617 | -1.2  | 0.0789 | -1.09 | 0.3113 | -1.44  | 0.014  |
| 94823_at   | 1426660_x_at | Rpl23a        | ribosomal protein L23a                                                                                             | 1.14   | 0.32 | 1.1   | 0.1439 | 1.07  | 0.4018 | 1.14  | 0.0093 | 1.39   | 0.0544 |
| 94825_at   | 1426019_at   | Plaa          | phospholipase A2, activating protein                                                                               | -1.44  | 0.09 | -1.52 | 0.0674 | -1.31 | 0.1371 | -1.18 | 0.3932 | 1.12   | 0.8281 |
| 94827_at   | 1456601_x_at | Fxyd2         | FXID domain-containing ion transport regulator                                                                     | -1.18  | 0.8  | 1.06  | 0.7019 | 1.51  | 0.0321 | 1.37  | 0.123  | -1.09  | 0.7716 |
| 94828_at   | 1416750_at   | Oprs1         | opioid receptor, sigma 1                                                                                           | -1.3   | 0.14 | -1.41 | 0.0013 | -1.24 | 0.0356 | -1.61 | 0      | -1.91  | 0.0004 |
| 94831_at   | 1417490_at   | Ctsb          | cathepsin B                                                                                                        | 1.05   | 0.77 | 1.06  | 0.1487 | -1.05 | 0.0671 | -1.06 | 0.2855 | 1.06   | 0.4361 |
| 94832_at   | 1415963_at   | Hnrph2        | heterogeneous nuclear ribonucleoprotein H2                                                                         | 1.04   | 0.93 | 1.1   | 0.3266 | 1.29  | 0.2531 | 1.24  | 0.1452 | -1.54  | 0.0468 |
| 94833_at   | 1448259_at   | Fstl1         | follicle-stimulating-like 1                                                                                        | 1      | 0.95 | -1.1  | 0.5543 | -1.37 | 0.1219 | 1.11  | 0.4257 | 2.1    | 0.0519 |
| 94834_at   | 1418365_at   | Ctsh          | cathepsin H                                                                                                        | -1.08  | 0.24 | 1.09  | 0.0387 | 1.12  | 0.0112 | 1.07  | 0.0579 | -1.11  | 0.1126 |
| 94835_f_at | 1427347_s_at | ---           | ---                                                                                                                | -1.44  | 0.19 | -1.14 | 0.443  | 1.04  | 0.8233 | -1.17 | 0.2627 | -1.86  | 0.0704 |
| 94836_at   | 1419965_at   | C79445        | expressed sequence C79445                                                                                          | -1.75  | 0.48 | -1.11 | 0.7535 | -1.07 | 0.8304 | 1.13  | 0.754  | -1.46  | 0.4178 |
| 94837_at   | 1415858_at   | Eif3s8        | eukaryotic translation initiation factor 3, subunit 8                                                              | 1.41   | 0.18 | -1.08 | 0.0114 | 1.04  | 0.3918 | 1.02  | 0.6132 | -1.3   | 0.0806 |
| 94839_at   | 1416903_at   | Nucb1         | nucleobindin 1                                                                                                     | 1.03   | 0.81 | -1.05 | 0.3574 | -1.04 | 0.395  | -1.17 | 0.0009 | 1.1    | 0.3608 |
| 94840_at   | 1449024_a_at | Hexa          | hexosaminidase A                                                                                                   | 1.2    | 0.25 | 1.44  | 0      | 1.11  | 0.1378 | 1.39  | 0.0001 | 1.6    | 0.0077 |
| 94841_at   | 1424681_a_at | Psma5         | proteasome (prosome, macropain) subunit, type 5, alpha                                                             | 1      | 0.99 | 1.17  | 0.1878 | 1.08  | 0.3459 | 1.15  | 0.121  | -1.47  | 0.006  |
| 94843_at   | 1427885_at   | Pold4         | polymerase (DNA-directed), delta 4                                                                                 | 2.98   | 0.03 | 1.06  | 0.2568 | -1.1  | 0.121  | 1.05  | 0.4396 | 1.21   | 0.387  |
| 94845_at   | 1415764_at   | 5730454B08Rik | RIKEN cDNA 5730454B08 gene                                                                                         | -1.08  | 0.62 | 1.28  | 0.0105 | 1.29  | 0.0107 | 1.22  | 0.0295 | 1.17   | 0.0985 |
| 94850_at   | 1449968_s_at | MGI:1928939   | acyl-Coenzyme A thioesterase 2, mitochondrial                                                                      | 1.11   | 0.51 | 1.13  | 0.4519 | 1.09  | 0.2861 | 1.14  | 0.4858 | 1.07   | 0.6827 |

|            |              |               |                                                                  |       |      |       |        |       |        |       |        |       |        |
|------------|--------------|---------------|------------------------------------------------------------------|-------|------|-------|--------|-------|--------|-------|--------|-------|--------|
| 94852_at   | 1426236_a_at | Glul          | glutamate-ammonia ligase (glutamine synthetase)                  | -1.51 | 0.4  | -1.43 | 0.0001 | 1.04  | 0.5016 | -1.63 | 0      | -1.57 | 0.2493 |
| 94853_at   | 1417432_a_at | Gnb1          | guanine nucleotide binding protein, beta 1                       | 1.63  | 0.01 | 1.25  | 0.0972 | 1.23  | 0.0424 | 1.44  | 0.0001 | 1.29  | 0.062  |
| 94855_at   | 1448563_at   | Phb           | prohibitin                                                       | 3.01  | 0    | -1.12 | 0.1532 | 1.09  | 0.41   | -1.06 | 0.5704 | -1.59 | 0.0634 |
| 94857_at   | 1417572_at   | Mpg           | N-methylpurine-DNA glycosylase                                   | 1.13  | 0.11 | -1.05 | 0.4938 | -1.03 | 0.5063 | 1.06  | 0.3478 | -1.18 | 0.6058 |
| 94860_at   | 1426256_at   | Timm17a       | translocator of inner mitochondrial membrane                     | 1.42  | 0.06 | -1    | 0.9845 | 1.19  | 0.1262 | 1.17  | 0.1036 | -1.08 | 0.5044 |
| 94861_at   | 1449718_s_at | 4930453N24Rik | RIKEN cDNA 4930453N24 gene                                       | -1.18 | 0.4  | -1.01 | 0.9077 | -1.12 | 0.1483 | -1    | 0.9776 | -1.95 | 0.0072 |
| 94865_at   | 1415788_at   | BC002236      | cDNA sequence BC002236                                           | 1     | 0.99 | 1.04  | 0.6524 | 1.3   | 0.0443 | 1.18  | 0.153  | -1.11 | 0.6149 |
| 94866_at   | 1448869_a_at | Mrps16        | mitochondrial ribosomal protein S16                              | -1.49 | 0.43 | 1.39  | 0.0406 | 1.31  | 0.27   | 1.38  | 0.1623 | 1.05  | 0.8808 |
| 94868_at   | 1423712_a_at | Qars          | glutamyl-tRNA synthetase                                         | 1.27  | 0.21 | 1.04  | 0.451  | 1.13  | 0.1206 | 1.16  | 0.024  | -1.16 | 0.6434 |
| 94871_r_at | 1428163_at   | Sara2         | SAR1a gene homolog 2 (S. cerevisiae)                             | 1.08  | 0.59 | 1.19  | 0.1975 | 1.03  | 0.8225 | 1.18  | 0.2464 | -1.38 | 0.0235 |
| 94872_at   | 1416635_at   | Smpd3a        | sphingomyelin phosphodiesterase, acid-like                       | 1.44  | 0.29 | -1.14 | 0.106  | 1.11  | 0.4917 | -1.11 | 0.3043 | -1.42 | 0.0149 |
| 94875_at   | 1416093_a_at | Mrpl20        | mitochondrial ribosomal protein L20                              | 1.34  | 0.1  | -1.07 | 0.1526 | 1.11  | 0.1313 | 1.04  | 0.5849 | -1.66 | 0.0706 |
| 94876_f_at | 1424710_a_at | Gorasp2       | golgi reassembly stacking protein 2                              | -1.53 | 0.02 | -1.13 | 0.0565 | 1.17  | 0.2314 | -1.06 | 0.3585 | -1.49 | 0.0047 |
| 94878_at   | 1455286_at   | Btbd1         | BTB (POZ) domain containing 1                                    | 1.3   | 0.1  | -1.15 | 0.0911 | -1.1  | 0.2573 | -1.21 | 0.0142 | 1.13  | 0.1668 |
| 94881_at   | 1424638_at   | Cdkn1a        | cyclin-dependent kinase inhibitor 1A (P21)                       | 1.32  | 0.12 | 1.21  | 0.2996 | -1.33 | 0.0734 | 1.41  | 0.1191 | -1.05 | 0.9313 |
| 94882_at   | 1416446_at   | D9Wsu20e      | DNA segment, Chr 9, Wayne State University                       | -1.11 | 0.51 | -1.11 | 0.1996 | 1.06  | 0.5408 | -1.08 | 0.2344 | -1.29 | 0.1853 |
| 94885_at   | 1426666_a_at | Unc84a        | unc-84 homolog A (C. elegans)                                    | 1.78  | 0.06 | -1.01 | 0.8985 | 1     | 0.9915 | 1.01  | 0.929  | 1.05  | 0.8717 |
| 94886_at   | 1415692_s_at | Canx          | calnexin                                                         | -1.34 | 0.09 | 1.1   | 0.3118 | 1.03  | 0.7452 | -1.12 | 0.1526 | 1.1   | 0.4247 |
| 94889_at   | 1416466_at   | Vapa          | vesicle-associated membrane protein, associated with syntaxin 13 | -1.03 | 0.91 | -1.17 | 0.0024 | 1.03  | 0.4614 | -1.07 | 0.0118 | -1.09 | 0.5901 |
| 94892_r_at | 1416810_at   | Mea1          | male enhanced antigen 1                                          | 1.12  | 0.3  | 1.03  | 0.7186 | 1.07  | 0.1325 | 1.02  | 0.8097 | 1.16  | 0.2897 |
| 94893_at   | 1429451_at   | 2610301B20Rik | RIKEN cDNA 2610301B20 gene                                       | -1.43 | 0.29 | -1.06 | 0.6733 | 1.22  | 0.0675 | 1.01  | 0.8984 | -1.42 | 0.0012 |
| 94895_at   | 1460357_at   | Ythdf2        | YTH domain family 2                                              | 1.33  | 0.5  | 1.13  | 0.1102 | 1.09  | 0.337  | 1.15  | 0.0425 | -1.03 | 0.5236 |
| 94896_at   | 1448144_at   | Hnrpab        | heterogeneous nuclear ribonucleoprotein A/B                      | -1.22 | 0.04 | -1.06 | 0.3254 | -1.09 | 0.2375 | -1.04 | 0.5904 | 1.1   | 0.4654 |
| 94897_at   | 1451695_a_at | Gpx4          | glutathione peroxidase 4                                         | 1.17  | 0.24 | 1.22  | 0.0099 | 1.05  | 0.5647 | 1.43  | 0      | 1.05  | 0.6333 |
| 94898_at   | 1420608_at   | Rbm18         | RNA binding motif protein 18                                     | 1.29  | 0.2  | 1.04  | 0.5541 | 1.15  | 0.1316 | 1.04  | 0.6312 | 1.07  | 0.7214 |
| 94899_at   | 1460342_s_at | AA536749      | expressed sequence AA536749                                      | -1.01 | 0.95 | 1.27  | 0.0164 | 1.23  | 0.0707 | 1.46  | 0      | 1.13  | 0.5257 |
| 94900_at   | 1418639_at   | Sftpc         | surfactant associated protein C                                  | -1.15 | 0.76 | -1.03 | 0.859  | -1.1  | 0.608  | 1.2   | 0.2935 | -1.3  | 0.5595 |
| 94902_at   | 1417633_at   | Sod3          | superoxide dismutase 3, extracellular                            | -1.87 | 0.01 | -1.21 | 0.0646 | -1.08 | 0.4297 | -1.56 | 0.0001 | 1.11  | 0.3519 |
| 94903_at   | 1419917_s_at | Tmed7         | transmembrane emp24 protein transport domain containing 7        | -1.58 | 0.02 | -1.02 | 0.7812 | 1.04  | 0.5722 | 1.05  | 0.3476 | -1.4  | 0.0085 |
| 94906_at   | 1416225_at   | Adh1          | alcohol dehydrogenase 1 (class I)                                | 1.15  | 0.16 | 1.04  | 0.4194 | 1.03  | 0.3288 | 1.03  | 0.3631 | 1.31  | 0.0466 |
| 94908_r_at | 1416367_at   | 1110001J03Rik | RIKEN cDNA 1110001J03 gene                                       | 1.12  | 0.83 | 1.11  | 0.2475 | 1.16  | 0.0575 | 1.14  | 0.2099 | -1.02 | 0.8536 |
| 94909_at   | 1453728_a_at | Mrps17        | mitochondrial ribosomal protein S17                              | 1.5   | 0.17 | -1.09 | 0.1641 | 1.08  | 0.0591 | 1.04  | 0.5741 | -1.17 | 0.1017 |
| 94910_at   | 1435737_a_at | Nde1          | nuclear distribution gene E homolog 1 (A. nidulans)              | 1.06  | 0.48 | -1.04 | 0.4616 | 1.04  | 0.472  | -1.02 | 0.7731 | -1.4  | 0.0142 |
| 94912_at   | 1422451_at   | Mrps21        | mitochondrial ribosomal protein S21                              | 1.5   | 0.12 | -1.14 | 0.0918 | 1.02  | 0.8733 | -1.1  | 0.2058 | -1.07 | 0.6525 |
| 94913_at   | 1415697_at   | E430034L04Rik | RIKEN cDNA E430034L04 gene                                       | -1.11 | 0.63 | -1.21 | 0.1115 | -1.2  | 0.0205 | -1.12 | 0.1816 | -1.17 | 0.3374 |
| 94914_at   | 1451441_at   | 2210415F13Rik | RIKEN cDNA 2210415F13 gene                                       | 1.34  | 0.55 | -1.22 | 0.2452 | -1.14 | 0.2607 | -1.33 | 0.0121 | -1.27 | 0.1392 |
| 94915_at   | 1450911_at   | Ppib          | peptidylprolyl isomerase B                                       | -1.01 | 0.99 | -1.13 | 0.1692 | -1.04 | 0.6694 | -1.07 | 0.2751 | -1.27 | 0.0506 |
| 94918_at   | 1451083_s_at | Aars          | alanyl-tRNA synthetase                                           | -1.3  | 0.1  | -1.4  | 0.0005 | -1.13 | 0.0486 | -1.46 | 0.0001 | -1.39 | 0.0192 |
| 94920_at   | 1415793_at   | Pnpo          | pyridoxine 5'-phosphate oxidase                                  | 1.53  | 0.03 | -1.11 | 0.1413 | -1.28 | 0.0183 | -1.24 | 0.0116 | -1.28 | 0.0002 |
| 94923_f_at | 1434468_at   | D8Ert69e      | DNA segment, Chr 8, ERATO Doi 69, expressed sequence             | -1.01 | 0.98 | -1.36 | 0.021  | -1.25 | 0.1932 | -1.31 | 0.1669 | 1.18  | 0.0999 |
| 94924_at   | 1424329_a_at | Prrg2         | proline-rich Gla (G-carboxyglutamic acid) protein                | 1.06  | 0.8  | -1.12 | 0.2312 | -1.1  | 0.374  | -1.25 | 0.0307 | -1.07 | 0.7582 |
| 94925_at   | 1423625_a_at | 1810055D05Rik | RIKEN cDNA 1810055D05 gene                                       | 1.4   | 0.1  | 1.01  | 0.8636 | 1.11  | 0.2611 | 1.06  | 0.4935 | -1.45 | 0.1056 |
| 94927_at   | 1421804_at   | Fabp9         | fatty acid binding protein 9, testis                             | -2.19 | 0.46 | 1.12  | 0.5004 | 1.12  | 0.4777 | -1.01 | 0.9553 | -1.48 | 0.0267 |
| 94928_at   | 1418099_at   | Tnfrsf1b      | tumor necrosis factor receptor superfamily, member 1B            | 1.03  | 0.77 | -1.22 | 0.0303 | -1    | 0.9816 | 1.12  | 0.358  | 1.03  | 0.7092 |
| 94929_at   | 1417068_a_at | Ptpn1         | protein tyrosine phosphatase, non-receptor type 1                | 1.66  | 0.43 | 1.29  | 0.2229 | -1.16 | 0.3939 | 1.25  | 0.2533 | -1.04 | 0.791  |
| 94930_at   | 1450663_at   | Thbs2         | thrombospondin 2                                                 | -1.59 | 0.37 | 1.18  | 0.522  | 1.21  | 0.3681 | 1.31  | 0.2154 | 2.45  | 0.0332 |
| 94931_at   | 1418899_at   | 1810045K17Rik | RIKEN cDNA 1810045K17 gene                                       | 1.29  | 0.26 | -1.12 | 0.1004 | -1.11 | 0.1275 | -1.2  | 0.0027 | -1.54 | 0.0317 |
| 94932_at   | 1418711_at   | Pdgfra        | platelet derived growth factor, alpha                            | -1.29 | 0.33 | -1.12 | 0.3189 | -1.33 | 0.0436 | -1.37 | 0.0231 | 1.34  | 0.0402 |
| 94933_at   | 1425323_a_at | BC008155      | cDNA sequence BC008155                                           | 1.01  | 0.95 | 1.07  | 0.1677 | -1.11 | 0.3596 | -1.01 | 0.8503 | -1.48 | 0.3888 |
| 94934_at   | 1415832_at   | Agtr2         | angiotensin II receptor, type 2                                  | -2.49 | 0.03 | 1.45  | 0.2928 | -1.1  | 0.6486 | 1.17  | 0.4984 | 1.14  | 0.5756 |
| 94936_at   | 1418215_at   | Mep1b         | mephrin 1 beta                                                   | -2.34 | 0.37 | -1.11 | 0.4475 | 1.24  | 0.3097 | 1.06  | 0.7496 | -1.21 | 0.6577 |
| 94937_at   | 1433953_at   | Zfp277        | zinc finger protein 277                                          | 1.74  | 0.22 | 1.24  | 0.0586 | 1.16  | 0.4529 | 1.2   | 0.0896 | 1.87  | 0.1615 |
| 94939_at   | 1448617_at   | Cd53          | CD53 antigen                                                     | 1.88  | 0.1  | 2.49  | 0.2609 | 1.1   | 0.5515 | 3.37  | 0.169  | -1.15 | 0.7528 |

|            |              |               |                                                      |       |      |       |        |       |        |       |        |       |        |
|------------|--------------|---------------|------------------------------------------------------|-------|------|-------|--------|-------|--------|-------|--------|-------|--------|
| 94940_at   | 1417227_at   | Mccc1         | methylcrotonoyl-Coenzyme A carboxylase 1             | 1.5   | 0.2  | -1.05 | 0.5117 | -1.07 | 0.6023 | -1.17 | 0.0851 | -1.17 | 0.2002 |
| 94941_at   | 1421389_a_at | Eif2ak4       | eukaryotic translation initiation factor 2 alpha     | 2.39  | 0.1  | -1.04 | 0.8221 | -1.05 | 0.8123 | -1.19 | 0.2797 | 1.03  | 0.833  |
| 94942_at   | 1448597_at   | Cstf1         | cleavage stimulation factor, 3' pre-RNA, sub         | 1.09  | 0.57 | 1.07  | 0.2777 | 1.09  | 0.1733 | -1.02 | 0.7226 | -1.09 | 0.4252 |
| 94944_at   | 1416753_at   | Prkar1b       | protein kinase, cAMP dependent regulatory,           | -1.77 | 0.36 | 1.53  | 0.0063 | 1.09  | 0.6337 | 1.1   | 0.6365 | 2.4   | 0.2693 |
| 94945_at   | 1449694_s_at | Comm5         | COMM domain containing 5                             | 2.67  | 0    | -1.27 | 0.1037 | 1.02  | 0.9051 | -1.04 | 0.7044 | -1.85 | 0.2357 |
| 94946_at   | 1426686_s_at | Map3k3        | mitogen activated protein kinase kinase              | -1.01 | 0.94 | 1.24  | 0.0809 | -1.07 | 0.6531 | 1.11  | 0.3413 | 1.47  | 0.0043 |
| 94948_at   | 1449041_a_at | Trip6         | thyroid hormone receptor interactor 6                | 1.21  | 0.31 | 1.18  | 0.1107 | 1.28  | 0.1174 | 1.39  | 0.0018 | -1.05 | 0.7644 |
| 94951_at   | 1452266_at   | 1810030A06Rik | RIKEN cDNA 1810030A06 gene                           | 1.73  | 0.01 | 1.17  | 0.0304 | 1.16  | 0.2736 | 1.35  | 0.006  | 1.45  | 0.0023 |
| 94952_at   | 1437103_at   | C330012H03Rik | RIKEN cDNA C330012H03 gene                           | -1.56 | 0.13 | -1.16 | 0.0879 | -1.16 | 0.1155 | -1.22 | 0.0543 | 1.1   | 0.7068 |
| 94953_at   | 1421546_a_at | Racgap1       | Rac GTPase-activating protein 1                      | 1.93  | 0.28 | 2.26  | 0.007  | 1.46  | 0.2727 | 2.3   | 0.026  | -1.38 | 0.4897 |
| 94954_at   | 1423931_s_at | Anapc4        | anaphase promoting complex subunit 4                 | 3.72  | 0.03 | 1.1   | 0.4748 | 1.04  | 0.8511 | 1.13  | 0.2488 | -2.15 | 0.0612 |
| 94956_at   | 1452434_s_at | Dgcr6         | DiGeorge syndrome critical region gene 6             | 1.27  | 0.23 | -1.24 | 0.0103 | -1.11 | 0.0317 | -1.29 | 0.0094 | -1.61 | 0.0559 |
| 94957_at   | 1426345_at   | Prepl         | prolyl endopeptidase-like                            | 1.31  | 0.17 | -1.2  | 0.0181 | -1.09 | 0.1629 | -1.15 | 0.0404 | -1.86 | 0.0024 |
| 94958_at   | 1454893_at   | 1110013L07Rik | RIKEN cDNA 1110013L07 gene                           | -1.29 | 0.28 | 1.23  | 0.1401 | 1.07  | 0.6017 | 1.55  | 0.0039 | 1.35  | 0.3801 |
| 94963_at   | 1416156_at   | ---           | ---                                                  | 1.27  | 0.39 | 1.43  | 0.0008 | 1.12  | 0.4128 | 1.69  | 0      | -1.32 | 0.0791 |
| 94964_at   | 1416157_at   | Vcl           | vinculin                                             | 1.32  | 0.71 | 1.54  | 0.0221 | 1.07  | 0.8036 | 1.35  | 0.1091 | 2.05  | 0.1316 |
| 94966_at   | 1448354_at   | G6pdx         | glucose-6-phosphate dehydrogenase X-link             | -1.17 | 0.2  | 1.06  | 0.784  | -1.37 | 0.0276 | 1.05  | 0.8602 | 2.14  | 0.0175 |
| 94967_at   | 1433702_at   | D19Wsu12e     | DNA segment, Chr 19, Wayne State Univer              | 1.21  | 0.37 | 1.15  | 0.1204 | -1.06 | 0.4499 | 1.23  | 0.0004 | -1.28 | 0.0887 |
| 94968_at   | 1448963_at   | Nfyc          | nuclear transcription factor-Y gamma                 | 1.05  | 0.78 | 1.2   | 0.016  | 1.21  | 0.0849 | 1.31  | 0.0035 | 1.37  | 0.0932 |
| 94973_at   | 1428320_at   | Jmjd1b        | jumonji domain containing 1B                         | 1.06  | 0.71 | -1.07 | 0.442  | -1.02 | 0.8468 | 1     | 0.978  | -1.05 | 0.6338 |
| 94975_at   | 1433527_at   | ---           | ---                                                  | -1    | 1    | 1.02  | 0.8359 | -1.02 | 0.782  | -1.06 | 0.565  | -1.28 | 0.0846 |
| 94976_at   | 1423975_s_at | Numa1         | nuclear mitotic apparatus protein 1                  | 1.01  | 0.91 | 1.16  | 0.0131 | 1.09  | 0.3222 | -1.05 | 0.5175 | 1.27  | 0.0721 |
| 94977_at   | 1460203_at   | Itpr1         | inositol 1,4,5-triphosphate receptor 1               | -1.13 | 0.46 | -1.15 | 0.2164 | 1.08  | 0.6479 | -1.28 | 0.0483 | -1.6  | 0.0157 |
| 94978_at   | 1416171_at   | 2310037I24Rik | RIKEN cDNA 2310037I24 gene                           | 1.43  | 0.33 | 1.08  | 0.3553 | 1.25  | 0.0228 | 1.19  | 0.1667 | -1.1  | 0.4258 |
| 94979_at   | 1424071_s_at | BC018507      | cDNA sequence BC018507                               | 1.15  | 0.39 | 1.11  | 0.3325 | 1.36  | 0.0677 | 1.17  | 0.1769 | 1.03  | 0.7884 |
| 94980_at   | 1452594_at   | Dusp11        | dual specificity phosphatase 11 (RNA/RNP c           | 1.33  | 0.2  | -1.01 | 0.8933 | 1.01  | 0.9035 | 1.01  | 0.8861 | 1.43  | 0.4038 |
| 94983_at   | 1451283_at   | 1810073G14Rik | RIKEN cDNA 1810073G14 gene                           | 1.38  | 0.58 | 1.11  | 0.2854 | 1.04  | 0.7856 | 1.09  | 0.4106 | 1.14  | 0.4735 |
| 94985_at   | 1426402_at   | Syncrip       | synaptotagmin binding, cytoplasmic RNA int           | 1.49  | 0.13 | 1.08  | 0.494  | 1.26  | 0.0972 | 1.11  | 0.1878 | -1.36 | 0.229  |
| 94986_at   | 1417428_at   | Gng3          | guanine nucleotide binding protein (G protei         | -1.32 | 0.2  | -1.07 | 0.767  | 1.09  | 0.6811 | -1.01 | 0.9563 | 1.05  | 0.8624 |
| 94987_at   | 1450612_a_at | Pemt          | phosphatidylethanolamine N-methyltransfer            | -1.02 | 0.93 | -1.2  | 0.0018 | 1.1   | 0.193  | -1.27 | 0      | -1.11 | 0.4431 |
| 94989_at   | 1454722_at   | Herc1         | hect (homologous to the E6-AP (UBE3A) ca             | 1.04  | 0.89 | -1.1  | 0.0231 | -1.1  | 0.3106 | -1.19 | 0.0002 | -1.2  | 0.019  |
| 94990_at   | 1448567_at   | C78915        | expressed sequence C78915                            | 1.82  | 0.05 | -1.07 | 0.3513 | -1.03 | 0.7146 | -1.1  | 0.0589 | 1.17  | 0.5294 |
| 94991_at   | 1434089_at   | Synpo         | synaptopodin                                         | 1.21  | 0.48 | -1.41 | 0.0147 | -1.11 | 0.2802 | -1.24 | 0.102  | 1.27  | 0.5424 |
| 94992_at   | 1423301_at   | Copb1         | coatamer protein complex, subunit beta 1             | 1.11  | 0.62 | -1.12 | 0.1858 | 1.07  | 0.6177 | -1.07 | 0.2345 | -1.36 | 0.1188 |
| 94994_at   | 1425633_at   | Cfh           | complement component factor h                        | 1.14  | 0.68 | -1.42 | 0.0112 | -1.07 | 0.414  | -1.55 | 0.0005 | -1.52 | 0.3913 |
| 94995_at   | 1435695_a_at | A030007L17Rik | RIKEN cDNA A030007L17 gene                           | 3.25  | 0.02 | -1.3  | 0.0044 | -1.12 | 0.1345 | -1.36 | 0.0012 | -2.27 | 0.0204 |
| 94998_at   | 1450870_at   | Rala          | v-ral simian leukemia viral oncogene homolo          | 1.73  | 0.16 | -1.18 | 0.1669 | 1.02  | 0.8745 | -1.01 | 0.9382 | -1.05 | 0.6135 |
| 95000_g_at | 1452270_s_at | Cubn          | cubilin (intrinsic factor-cobalamin receptor)        | -1.17 | 0.56 | -1.27 | 0.0228 | -1.22 | 0.119  | -1.12 | 0.088  | -1.13 | 0.8336 |
| 95001_at   | 1450983_at   | Akap8         | A kinase (PRKA) anchor protein 8                     | 1.88  | 0.14 | 1.47  | 0.1605 | 1.87  | 0.0345 | 1.71  | 0.036  | -1.03 | 0.869  |
| 95002_at   | 1460741_x_at | D17Wsu92e     | DNA segment, Chr 17, Wayne State Univer              | 1.24  | 0.18 | 1.03  | 0.6617 | 1.07  | 0.5115 | -1.11 | 0.1333 | 1.04  | 0.7418 |
| 95003_at   | 1452596_at   | Polr2k        | polymerase (RNA) II (DNA directed) polypep           | 1.17  | 0.26 | 1.02  | 0.5247 | 1.16  | 0.1489 | 1.08  | 0.1258 | -1.09 | 0.6276 |
| 95004_at   | 1428255_at   | Luc7l         | Luc7 homolog (S. cerevisiae)-like                    | -1.26 | 0.18 | 1.18  | 0.0219 | 1.08  | 0.2408 | 1.18  | 0.1276 | 1.52  | 0.0016 |
| 95007_at   | 1426949_s_at | Tpr           | translocated promoter region                         | 2.52  | 0.09 | 1.5   | 0.0372 | -1.06 | 0.4896 | 1.33  | 0.0081 | -1.32 | 0.3018 |
| 95010_at   | 1418587_at   | Traf3         | Tnf receptor-associated factor 3                     | 1.16  | 0.59 | -1.01 | 0.886  | -1.04 | 0.5481 | 1.04  | 0.7105 | -1.16 | 0.2984 |
| 95011_at   | 1427905_at   | 1810063B07Rik | RIKEN cDNA 1810063B07 gene                           | 1.2   | 0.13 | -1.03 | 0.5751 | 1.11  | 0.1825 | 1.07  | 0.1924 | -1.18 | 0.4807 |
| 95012_at   | 1448209_a_at | Slc22a17      | solute carrier family 22 (organic cation transp      | -1.09 | 0.82 | -1.39 | 0.0157 | -1.25 | 0.1174 | -1.46 | 0.0219 | 1.13  | 0.757  |
| 95014_at   | 1417501_at   | Fbxo6b        | F-box only protein 6b                                | -1.1  | 0.58 | -1.2  | 0.1072 | 1.12  | 0.0762 | -1.07 | 0.322  | -1.34 | 0.0089 |
| 95015_at   | 1450455_s_at | Akr1c12       | aldo-keto reductase family 1, member C12             | 1.29  | 0.28 | 1.14  | 0.188  | -1    | 0.975  | 1.25  | 0.0338 | -1.08 | 0.1523 |
| 95016_at   | 1418084_at   | Nrp1          | neuropilin 1                                         | -1.38 | 0.31 | -1.45 | 0.0016 | -1.22 | 0.046  | -1.63 | 0.0001 | -1.78 | 0.0851 |
| 95018_r_at | 1433903_at   | AU021838      | expressed sequence AU021838                          | -1.52 | 0.07 | -1.06 | 0.6847 | -1.13 | 0.4351 | -1.02 | 0.8487 | 1.01  | 0.9238 |
| 95019_at   | 1418186_at   | Gstt1         | glutathione S-transferase, theta 1                   | 1.8   | 0.02 | 1.09  | 0.1236 | -1.13 | 0.0255 | -1    | 0.9917 | 1.47  | 0.0372 |
| 95020_at   | 1428187_at   | Cd47          | CD47 antigen (Rh-related antigen, integrin- $\alpha$ | -1.03 | 0.93 | 1.25  | 0.0394 | 1.29  | 0.0415 | 1.49  | 0.0002 | 1.05  | 0.573  |
| 95021_at   | 1433597_at   | 9430010O03Rik | RIKEN cDNA 9430010O03 gene                           | 1.33  | 0.09 | 1.1   | 0.1845 | 1.04  | 0.6281 | -1.05 | 0.5873 | -1.05 | 0.7465 |

|            |              |               |                                                  |       |      |       |        |       |        |       |        |       |        |
|------------|--------------|---------------|--------------------------------------------------|-------|------|-------|--------|-------|--------|-------|--------|-------|--------|
| 95022_at   | 1419706_a_at | Akap12        | A kinase (PRKA) anchor protein (gravin) 12       | 3.88  | 0.01 | -2.14 | 0.0157 | -1.56 | 0.138  | -1.58 | 0.1359 | 2.93  | 0.0325 |
| 95023_at   | 1426940_at   | Sidt2         | SID1 transmembrane family, member 2              | -1.29 | 0.05 | -1.35 | 0      | -1.12 | 0.0612 | -1.37 | 0      | -1.32 | 0.0031 |
| 95024_at   | 1418191_at   | Usp18         | ubiquitin specific protease 18                   | 1.3   | 0.51 | 2.26  | 0.05   | 1.61  | 0.059  | 2.86  | 0.0244 | 5.77  | 0      |
| 95025_at   | 1448900_at   | D16H22S680E   | DNA segment, Chr 16, human D22S680E, e           | 1.16  | 0.38 | -1.04 | 0.5278 | 1.24  | 0.116  | 1.33  | 0.0008 | -1.14 | 0.0578 |
| 95027_at   | 1454034_a_at | Usp21         | ubiquitin specific protease 21                   | -1.14 | 0.83 | -1.01 | 0.9386 | -1.02 | 0.8696 | 1.04  | 0.6752 | 1.55  | 0.2819 |
| 95029_at   | 1417475_at   | Atp13a1       | ATPase type 13A1                                 | 1.41  | 0.31 | 1.13  | 0.2924 | 1.22  | 0.0367 | 1.14  | 0.1408 | -1.12 | 0.3833 |
| 95030_at   | 1448556_at   | Prlr          | prolactin receptor                               | -5.06 | 0.01 | -1.9  | 0.0008 | -1.28 | 0.1572 | -4.13 | 0      | -2.44 | 0.0234 |
| 95032_at   | 1423775_s_at | Prc1          | protein regulator of cytokinesis 1               | 1.63  | 0.36 | 1     | 0.9842 | -1.06 | 0.7472 | 1.22  | 0.3818 | 1.78  | 0.3156 |
| 95033_at   | 1426810_at   | Jmjd1a        | jumonji domain containing 1A                     | -1.23 | 0.21 | 1.34  | 0.0102 | 1.35  | 0.0171 | 1.4   | 0.0014 | 1.23  | 0.113  |
| 95034_f_at | 1436420_a_at | Ipo4          | importin 4                                       | -1.19 | 0.25 | -1.45 | 0.0015 | -1.12 | 0.2773 | -1.23 | 0.0316 | -1.14 | 0.1801 |
| 95035_at   | 1450814_a_at | Ipo4          | importin 4                                       | -1.04 | 0.89 | 1.11  | 0.0425 | 1.01  | 0.8781 | 1.07  | 0.1946 | -1.01 | 0.9461 |
| 95036_at   | 1451129_at   | Calb2         | calbindin 2                                      | -1.23 | 0.62 | 1.08  | 0.4296 | 1.07  | 0.2901 | 1.16  | 0.1403 | 1.1   | 0.454  |
| 95037_at   | 1417269_at   | Cdk9          | cyclin-dependent kinase 9 (CDC2-related kii      | 1.26  | 0.12 | 1.16  | 0.0769 | 1.04  | 0.699  | 1.23  | 0.0037 | -1.03 | 0.745  |
| 95040_at   | 1415937_s_at | Pdcd6ip       | programmed cell death 6 interacting protein      | -1.12 | 0.58 | 1.05  | 0.5831 | -1.09 | 0.4907 | -1.1  | 0.4312 | -1.33 | 0.0217 |
| 95041_at   | 1449046_a_at | 1110007C05Rik | RIKEN cDNA 1110007C05 gene                       | -1.52 | 0.13 | -1.28 | 0.0037 | -1.17 | 0.1511 | -1.39 | 0.0036 | 1.32  | 0.4646 |
| 95042_at   | 1424196_at   | C030002N13Rik | RIKEN cDNA C030002N13 gene                       | 1.23  | 0.23 | -1.13 | 0.0454 | -1.01 | 0.8228 | -1.1  | 0.1383 | -1.27 | 0.0396 |
| 95043_at   | 1424273_at   | Cyp2c70       | cytochrome P450, family 2, subfamily c, poly     | -1.32 | 0.41 | -1.48 | 0.0004 | -1.4  | 0.0007 | -1.71 | 0.0001 | -2.07 | 0.0233 |
| 95044_at   | 1416508_at   | Med28         | mediator of RNA polymerase II transcription      | 2.3   | 0.01 | 1.11  | 0.3888 | -1.21 | 0.0195 | 1.01  | 0.8608 | -1.58 | 0.0895 |
| 95045_at   | 1417710_at   | 0610012D09Rik | RIKEN cDNA 0610012D09 gene                       | 1.02  | 0.89 | 1.14  | 0.0459 | 1.03  | 0.7102 | 1.11  | 0.0667 | -1.53 | 0.0019 |
| 95046_s_at | 1449940_a_at | Eif2b4        | eukaryotic translation initiation factor 2B, sul | 1.31  | 0.13 | -1.01 | 0.8233 | -1.05 | 0.4586 | -1.06 | 0.2596 | 1.01  | 0.9736 |
| 95049_at   | 1452680_at   | Snrpd2        | small nuclear ribonucleoprotein D2               | 1.35  | 0.2  | 1.03  | 0.6319 | 1.04  | 0.4942 | 1.06  | 0.4446 | 1.04  | 0.8253 |
| 95053_s_at | 1418005_at   | Sdhb          | succinate dehydrogenase complex, subunit         | 1.62  | 0.09 | 1.08  | 0.0421 | -1.02 | 0.4769 | 1.1   | 0.103  | 1.08  | 0.3926 |
| 95054_at   | 1460323_at   | Tars          | threonyl-tRNA synthetase                         | -1.63 | 0.02 | -1.73 | 0      | -1.04 | 0.5028 | -1.66 | 0      | -2.52 | 0      |
| 95057_at   | 1448185_at   | Herpud1       | homocysteine-inducible, endoplasmic reticul      | 1.7   | 0.15 | 1.44  | 0.003  | 1.56  | 0.0001 | 1.75  | 0      | 1.35  | 0.0754 |
| 95058_f_at | 1423833_a_at | 2610205H19Rik | RIKEN cDNA 2610205H19 gene                       | 1.18  | 0.33 | 1.19  | 0.0364 | 1.07  | 0.4725 | 1.14  | 0.0713 | 1.38  | 0.0061 |
| 95059_at   | 1416187_s_at | Pnrc2         | proline-rich nuclear receptor coactivator 2      | -1.5  | 0.14 | 1.06  | 0.3307 | -1.16 | 0.1547 | -1.07 | 0.4283 | -1.35 | 0.1466 |
| 95060_at   | 1448502_at   | Slc16a7       | solute carrier family 16 (monocarboxylic acic    | 1.77  | 0.09 | 1.84  | 0.0001 | 1.27  | 0.1009 | 2     | 0.0001 | 2.49  | 0      |
| 95061_at   | 1418234_s_at | Bcas2         | breast carcinoma amplified sequence 2            | 1.76  | 0.16 | 1.23  | 0.142  | 1.37  | 0.0958 | 1.46  | 0.0083 | 1.51  | 0.3765 |
| 95062_at   | 1451413_at   | Cast          | calpastatin                                      | 1.14  | 0.13 | -1.11 | 0.2589 | -1.06 | 0.5032 | -1.01 | 0.8752 | -1.14 | 0.38   |
| 95063_at   | 1428069_at   | Cdca7         | cell division cycle associated 7                 | -1.19 | 0.29 | -1.26 | 0.0377 | 1.1   | 0.3228 | -1.43 | 0.0233 | -1.64 | 0.3113 |
| 95064_at   | 1428146_s_at | Acaa2         | acetyl-Coenzyme A acyltransferase 2 (mitoc       | -1.03 | 0.88 | -1.03 | 0.3509 | 1.06  | 0.0228 | 1.01  | 0.7982 | 1.17  | 0.0705 |
| 95065_at   | 1416373_at   | Nfs1          | nitrogen fixation gene 1 (S. cerevisiae)         | -1.17 | 0.04 | -1.03 | 0.5763 | 1.09  | 0.134  | -1.09 | 0.0387 | -1.53 | 0.0077 |
| 95066_at   | 1425129_a_at | Taldo1        | transaldolase 1                                  | 1.5   | 0.07 | -1.19 | 0.0134 | -1.14 | 0.0261 | -1.19 | 0.0031 | -2.11 | 0.0004 |
| 95067_at   | 1448811_at   | Mrpl2         | mitochondrial ribosomal protein L2               | 1.51  | 0.11 | -1.07 | 0.2828 | 1.12  | 0.0968 | 1.06  | 0.4013 | -1.37 | 0.097  |
| 95068_at   | 1417182_at   | Dnaja2        | DnaJ (Hsp40) homolog, subfamily A, membe         | -1.06 | 0.75 | -1.16 | 0.0166 | 1.13  | 0.0663 | -1.08 | 0.2038 | -1.32 | 0.0222 |
| 95069_at   | 1426789_s_at | Ssrp1         | structure specific recognition protein 1         | -1.01 | 0.98 | 1.04  | 0.7389 | 1.19  | 0.2612 | 1.09  | 0.4871 | -1.05 | 0.8422 |
| 95070_at   | 1452866_at   | Nars          | asparaginyl-tRNA synthetase                      | 1.03  | 0.88 | 1.15  | 0.0592 | 1.35  | 0.0094 | 1.13  | 0.0768 | -1.57 | 0.0061 |
| 95071_at   | 1449180_at   | Kcmf1         | potassium channel modulatory factor 1            | -1.08 | 0.49 | 1.03  | 0.7232 | 1.02  | 0.6799 | -1.02 | 0.6497 | 1.22  | 0.2172 |
| 95072_at   | 1416604_at   | Cyc1          | cytochrome c-1                                   | 1.28  | 0.02 | 1.08  | 0.0241 | 1.11  | 0.0438 | 1.11  | 0.0396 | -1.05 | 0.6585 |
| 95074_at   | 1416425_at   | Pex19         | peroxisome biogenesis factor 19                  | 1.31  | 0.24 | -1.11 | 0.1767 | 1.2   | 0.1592 | -1.02 | 0.8144 | -1.48 | 0.0402 |
| 95075_at   | 1426447_at   | Nup35         | nucleoporin 35                                   | -1.02 | 0.79 | 1.03  | 0.8499 | -1.03 | 0.8607 | 1.06  | 0.7328 | 1.01  | 0.9803 |
| 95076_at   | 1452584_at   | 1500032L24Rik | RIKEN cDNA 1500032L24 gene                       | -1.09 | 0.67 | -1.04 | 0.4912 | 1.09  | 0.0459 | -1.01 | 0.8331 | 1.02  | 0.8391 |
| 95077_at   | 1419553_a_at | Rabggtb       | RAB geranylgeranyl transferase, b subunit        | 1.22  | 0.11 | 1.1   | 0.3404 | 1.32  | 0.0367 | 1.22  | 0.0502 | -1.07 | 0.637  |
| 95078_at   | 1452704_at   | 1200015F23Rik | RIKEN cDNA 1200015F23 gene                       | -1.19 | 0.15 | 1.03  | 0.7891 | -1.08 | 0.1908 | -1.08 | 0.5264 | -1.81 | 0.0065 |
| 95079_at   | 1421917_at   | Pdgfra        | platelet derived growth factor receptor, alph    | 1.98  | 0    | 1.09  | 0.2877 | -1.05 | 0.7603 | 1.29  | 0.0046 | 3.23  | 0.0105 |
| 95081_at   | 1420115_at   | Exosc8        | exosome component 8                              | -1.16 | 0.43 | -1.04 | 0.6485 | -1.18 | 0.102  | -1.12 | 0.3311 | 1.18  | 0.1022 |
| 95082_at   | 1423062_at   | Igf1bp3       | insulin-like growth factor binding protein 3     | -1.17 | 0.57 | 1.23  | 0.2473 | 1.35  | 0.1459 | 1.47  | 0.0408 | 2.17  | 0.0126 |
| 95086_at   | 1428201_at   | 2310036O22Rik | RIKEN cDNA 2310036O22 gene                       | 1.46  | 0.1  | -1.08 | 0.1036 | 1.15  | 0.0142 | 1.03  | 0.415  | -1.11 | 0.5759 |
| 95090_at   | 1455752_a_at | 2410001H17Rik | RIKEN cDNA 2410001H17 gene                       | 1.09  | 0.29 | 1.15  | 0.0375 | -1.11 | 0.1957 | 1.14  | 0.0043 | 1.18  | 0.0312 |
| 95091_at   | 1416241_at   | Sec13l1       | SEC13-like 1 (S. cerevisiae)                     | -1.28 | 0.31 | -1.13 | 0.0981 | 1     | 0.8931 | -1.06 | 0.4141 | -1.61 | 0.0001 |
| 95095_at   | 1448559_at   | Flot1         | flotillin 1                                      | 1.4   | 0.01 | 1.33  | 0.0148 | 1.73  | 0.0008 | 1.65  | 0.0002 | 1.88  | 0.0096 |
| 95096_at   | 1451179_a_at | Qk            | quaking                                          | -1.01 | 0.97 | 1.18  | 0.0081 | 1.2   | 0.0152 | 1.25  | 0.0025 | -1.04 | 0.8336 |
| 95097_at   | 1417157_at   | Actr10        | ARP10 actin-related protein 10 homolog (S.       | 1.41  | 0.13 | 1.12  | 0.0197 | 1.25  | 0.0867 | 1.2   | 0.0069 | -1.17 | 0.2353 |

|            |              |               |                                                    |       |      |       |        |       |        |       |        |       |        |
|------------|--------------|---------------|----------------------------------------------------|-------|------|-------|--------|-------|--------|-------|--------|-------|--------|
| 95098_at   | 1423650_at   | Rnf26         | ring finger protein 26                             | -1.35 | 0.16 | 1.05  | 0.5937 | 1.12  | 0.1206 | 1.08  | 0.3741 | 1.28  | 0.1614 |
| 95100_at   | 1456695_x_at | Anapc5        | anaphase-promoting complex subunit 5               | -1.01 | 0.95 | -1.09 | 0.1579 | 1.02  | 0.7855 | -1.08 | 0.1939 | 1.23  | 0.1932 |
| 95101_at   | 1448108_at   | Tde2          | tumor differentially expressed 2                   | 1.27  | 0.36 | 1.18  | 0.1248 | 1.02  | 0.8982 | 1.18  | 0.098  | 1.02  | 0.8729 |
| 95102_at   | 1423986_a_at | MGI:1915044   | scotin gene                                        | 1.09  | 0.31 | 1.16  | 0.4435 | -1.04 | 0.6612 | 1.32  | 0.3031 | 1.01  | 0.9516 |
| 95103_at   | 1417243_at   | 2310065K24Rik | RIKEN cDNA 2310065K24 gene                         | -1.12 | 0.41 | -1.1  | 0.1245 | 1.12  | 0.1753 | 1.01  | 0.8901 | -1.23 | 0.2113 |
| 95104_at   | 1417011_at   | Sdc2          | syndecan 2                                         | -1.03 | 0.88 | -1.03 | 0.6846 | -1.06 | 0.0342 | -1.21 | 0.0007 | -1.08 | 0.488  |
| 95105_at   | 1418002_at   | 2010110M21Rik | RIKEN cDNA 2010110M21 gene                         | -1.06 | 0.72 | 1.06  | 0.2131 | -1.03 | 0.3976 | 1.05  | 0.2462 | -1.13 | 0.3178 |
| 95109_at   | 1455035_s_at | Nol5a         | nucleolar protein 5A                               | 1.71  | 0.18 | 1.05  | 0.5968 | 1.36  | 0.0258 | 1.25  | 0.0257 | 1.37  | 0.0466 |
| 95110_at   | 1452920_a_at | Ppil2         | peptidylprolyl isomerase (cyclophilin)-like 2      | 1.1   | 0.66 | -1.05 | 0.4386 | -1.05 | 0.641  | -1.03 | 0.6122 | 1.46  | 0.1564 |
| 95114_s_at | 1451387_s_at | 0610039D01Rik | RIKEN cDNA 0610039D01 gene                         | 1.13  | 0.57 | 1.01  | 0.9212 | -1.03 | 0.7556 | -1.02 | 0.7423 | -1.07 | 0.6042 |
| 95117_at   | 1424111_at   | Igf2r         | insulin-like growth factor 2 receptor              | -1.04 | 0.77 | 1.17  | 0.0086 | 1.03  | 0.5303 | 1.28  | 0.0047 | 1.18  | 0.0226 |
| 95118_r_at | 1451128_s_at | Kif22         | kinesin family member 22                           | -1.21 | 0.52 | 1.15  | 0.5929 | -1.08 | 0.5012 | 1.25  | 0.3424 | -1.02 | 0.8279 |
| 95119_at   | 1428071_at   | 1110038D17Rik | RIKEN cDNA 1110038D17 gene                         | -1.03 | 0.87 | 1.09  | 0.8858 | 1.17  | 0.0001 | 1.15  | 0.0082 | 1.01  | 0.916  |
| 95120_at   | 1418643_at   | Tspan13       | tetraspanin 13                                     | -1.12 | 0.87 | 1.1   | 0.6852 | -1.53 | 0.0904 | 1.31  | 0.1979 | 3.63  | 0.0617 |
| 95122_g_at | 1423371_at   | Pole4         | polymerase (DNA-directed), epsilon 4 (p12)         | -1.27 | 0.35 | -1.33 | 0.0026 | -1.4  | 0.0075 | -1.9  | 0      | -1.21 | 0.4506 |
| 95123_at   | 1426889_at   | 4930566A11Rik | RIKEN cDNA 4930566A11 gene                         | 2.2   | 0.16 | -1.2  | 0.174  | 1     | 0.9782 | 1.07  | 0.6076 | 1.28  | 0.5395 |
| 95125_f_at | 1416578_at   | Rbx1          | ring-box 1                                         | 1.33  | 0.05 | 1.11  | 0.2284 | 1.12  | 0.2141 | 1.06  | 0.489  | -1.11 | 0.5223 |
| 95128_at   | 1415707_at   | Anapc2        | anaphase promoting complex subunit 2               | 1.32  | 0.33 | -1.04 | 0.4495 | -1.11 | 0.2209 | -1.07 | 0.1317 | -1.01 | 0.9237 |
| 95129_at   | 1448893_at   | Ncor2         | nuclear receptor co-repressor 2                    | -1.25 | 0.39 | -1.08 | 0.3142 | -1.08 | 0.4864 | 1.05  | 0.4404 | 1.03  | 0.8673 |
| 95132_r_at | 1453806_at   | Ndufb2        | NADH dehydrogenase (ubiquinone) 1 beta subunit     | -1.21 | 0.61 | -1.07 | 0.1923 | -1.05 | 0.5276 | -1.11 | 0.1366 | 1.02  | 0.9387 |
| 95133_at   | 1451095_at   | Asns          | asparagine synthetase                              | -1.97 | 0.11 | 1.1   | 0.1349 | 1.16  | 0.0233 | 1.13  | 0.0707 | 1.14  | 0.2281 |
| 95135_at   | 1416840_at   | Mid1ip1       | Mid1 interacting protein 1 (gastrulation specific) | -1.19 | 0.43 | -1.03 | 0.8365 | -1.02 | 0.8986 | -1.32 | 0.0187 | -2.55 | 0.0038 |
| 95136_at   | 1424285_s_at | Arl6ip4       | ADP-ribosylation factor-like 6 interacting protein | 1.64  | 0    | 1.16  | 0.0293 | 1.31  | 0.0106 | 1.33  | 0.0041 | 1     | 0.9755 |
| 95137_at   | 1416376_at   | 1810014L12Rik | RIKEN cDNA 1810014L12 gene                         | 1.57  | 0.03 | 1.02  | 0.7411 | 1.11  | 0.1001 | 1.11  | 0.0453 | -1.11 | 0.5989 |
| 95138_at   | 1429367_at   | 2510001110Rik | RIKEN cDNA 2510001110 gene                         | 1.67  | 0.02 | -1.15 | 0.0327 | -1.2  | 0.0102 | -1.1  | 0.0741 | -2.09 | 0.0258 |
| 95140_at   | 1456736_x_at | 5230400G24Rik | RIKEN cDNA 5230400G24 gene                         | -1.04 | 0.57 | 1.12  | 0.0957 | 1.23  | 0.0591 | 1.15  | 0.0378 | -1.15 | 0.276  |
| 95142_s_at | 1424168_a_at | ---           | ---                                                | 1.06  | 0.8  | 1     | 0.9887 | -1.09 | 0.4466 | 1.05  | 0.6651 | -1.26 | 0.1679 |
| 95144_at   | 1416079_a_at | Arpc1a        | actin related protein 2/3 complex, subunit 1A      | 1.16  | 0.56 | 1.07  | 0.1293 | 1.09  | 0.2123 | 1.01  | 0.8229 | -1.55 | 0.0505 |
| 95146_at   | 1424039_at   | 1810045K07Rik | RIKEN cDNA 1810045K07 gene                         | 1.32  | 0.14 | -1.02 | 0.5938 | -1.14 | 0.0227 | 1.01  | 0.8861 | -1.15 | 0.1453 |
| 95147_at   | 1417722_at   | Pgls          | 6-phosphogluconolactonase                          | -1.03 | 0.91 | -1    | 0.9511 | -1.04 | 0.725  | -1.1  | 0.1207 | -1.04 | 0.8115 |
| 95148_at   | 1448450_at   | ---           | ---                                                | 1.25  | 0.14 | 1.19  | 0.0517 | 1.15  | 0.0661 | 1.24  | 0.0039 | 1.1   | 0.5364 |
| 95149_at   | 1451825_a_at | Copz1         | coatamer protein complex, subunit zeta 1           | 1.13  | 0.66 | -1.15 | 0.0013 | -1.12 | 0.0269 | -1.24 | 0.0013 | -1.31 | 0.0184 |
| 95150_at   | 1417128_at   | 2810052M02Rik | RIKEN cDNA 2810052M02 gene                         | 1.14  | 0.59 | 1.47  | 0.3281 | -1.29 | 0.1405 | 1.67  | 0.3492 | 1.2   | 0.3134 |
| 95153_at   | 1435220_s_at | Cdc42se2      | CDC42 small effector 2                             | -1.25 | 0.42 | 1.18  | 0.0191 | 1.08  | 0.3511 | 1.23  | 0.0521 | 1.28  | 0.4689 |
| 95156_g_at | 1424384_a_at | Znrf1         | zinc and ring finger 1                             | 1.6   | 0.27 | 3.2   | 0.0024 | 1.95  | 0.1319 | 3.03  | 0.0037 | -1.05 | 0.9108 |
| 95157_at   | 1420950_at   | Znrf1         | zinc and ring finger 1                             | 2.34  | 0.14 | 1.45  | 0.3389 | 1.3   | 0.2156 | 1.09  | 0.6783 | 1.6   | 0.1252 |
| 95158_at   | 1415744_at   | ---           | ---                                                | 1.44  | 0.1  | 1.05  | 0.4567 | 1.11  | 0.1936 | -1.04 | 0.539  | -1.03 | 0.7249 |
| 95159_at   | 1451164_a_at | Mrps18b       | mitochondrial ribosomal protein S18B               | 1.4   | 0.07 | -1.09 | 0.1564 | -1.01 | 0.914  | -1.02 | 0.8317 | -1.17 | 0.071  |
| 95161_at   | 1451075_s_at | Ctdsp2        | CTD (carboxy-terminal domain, RNA polymerase II)   | -1.19 | 0.49 | 1.15  | 0.022  | -1    | 0.9968 | 1.1   | 0.1073 | 1.63  | 0.0002 |
| 95165_at   | 1448060_at   | Sema6d        | sema domain, transmembrane domain (TM)             | 1.19  | 0.08 | -1.03 | 0.7832 | 1.07  | 0.5422 | -1.05 | 0.5811 | 1.41  | 0.1919 |
| 95177_at   | 1449785_at   | AA414993      | expressed sequence AA414993                        | -1.49 | 0.57 | -1    | 0.9923 | 1.01  | 0.9758 | -1.27 | 0.4828 | 4.73  | 0.0745 |
| 95182_at   | 1449624_at   | ---           | ---                                                | -1.67 | 0.26 | 1.4   | 0.1649 | 1.4   | 0.2034 | -1.37 | 0.105  | 1.66  | 0.3387 |
| 95215_f_at | 1437666_x_at | Ubc           | ubiquitin C                                        | 1.14  | 0.56 | 1.06  | 0.6121 | -1.16 | 0.3106 | 1.05  | 0.652  | 1.05  | 0.7679 |
| 95228_f_at | 1421791_at   | Ang3          | angiogenin, ribonuclease A family, member 3        | 1.11  | 0.78 | 1.01  | 0.9655 | 1.09  | 0.3488 | 1.09  | 0.3856 | 1.74  | 0.0414 |
| 95232_at   | 1424101_at   | Hnrpl         | heterogeneous nuclear ribonucleoprotein L          | -1.37 | 0.26 | 1.01  | 0.9402 | 1.04  | 0.8322 | -1.02 | 0.8306 | -1.15 | 0.3226 |
| 95244_at   | 1421251_at   | Zfp40         | zinc finger protein 40                             | 1.49  | 0.3  | 1.04  | 0.6991 | 1.12  | 0.2401 | -1.04 | 0.7163 | 1.01  | 0.9722 |
| 95248_at   | 1420168_at   | AA517841      | expressed sequence AA517841                        | -2.28 | 0.26 | 1.21  | 0.0877 | 1.25  | 0.2057 | 1.08  | 0.5484 | -1.21 | 0.5937 |
| 95249_at   | 1420121_at   | AA517858      | expressed sequence AA517858                        | -1.36 | 0.17 | -1.09 | 0.6283 | 1.23  | 0.5883 | 1.47  | 0.4181 | -1.67 | 0.4642 |
| 95275_at   | 1421570_at   | Il9r          | interleukin 9 receptor                             | -1.16 | 0.51 | 1.06  | 0.6681 | -1.11 | 0.2374 | -1.12 | 0.2558 | 1.6   | 0.0597 |
| 95282_at   | 1438902_a_at | Hspca         | heat shock protein 1, alpha                        | 1.35  | 0.31 | -1.34 | 0.0162 | -1.11 | 0.261  | -1.55 | 0.0001 | -1.19 | 0.1724 |
| 95283_at   | 1450109_s_at | Abcc2         | ATP-binding cassette, sub-family C (CFTR/MDR)      | 1.53  | 0.14 | 1.27  | 0.0357 | 1.09  | 0.5992 | 1.65  | 0.0006 | -1.34 | 0.3529 |
| 95284_at   | 1419907_s_at | BB219290      | expressed sequence BB219290                        | -1.62 | 0.03 | -1.07 | 0.6925 | -1.01 | 0.9227 | -1.03 | 0.8101 | 2.01  | 0.0068 |
| 95285_at   | 1425058_at   | Zfp472        | zinc finger protein 472                            | -1.35 | 0.13 | -1.24 | 0.2817 | -1.35 | 0.1757 | -1.1  | 0.5299 | -1.38 | 0.2584 |

|            |              |           |                                                  |       |      |       |        |       |        |       |        |       |        |
|------------|--------------|-----------|--------------------------------------------------|-------|------|-------|--------|-------|--------|-------|--------|-------|--------|
| 95286_at   | 1418626_a_at | Clu       | clusterin                                        | 1.14  | 0.62 | 1.22  | 0.0003 | 1     | 0.9943 | 1.14  | 0.1428 | -1.22 | 0.2211 |
| 95290_at   | 1418810_at   | Crrh1     | corticotropin releasing hormone receptor 1       | 2.31  | 0.01 | -1.07 | 0.7278 | 1.08  | 0.6758 | -1.24 | 0.3017 | 1.53  | 0.245  |
| 95291_r_at | 1419846_at   | ---       | ---                                              | -3.85 | 0.19 | 1.46  | 0.2502 | 1.11  | 0.7455 | -1.07 | 0.8295 | 1.22  | 0.659  |
| 95292_at   | 1421194_at   | Itga4     | integrin alpha 4                                 | 1.01  | 0.96 | 1.04  | 0.8606 | 1.16  | 0.3332 | 1.26  | 0.2459 | -1.09 | 0.6928 |
| 95293_at   | 1419843_at   | ---       | ---                                              | -1.09 | 0.73 | -1.08 | 0.8025 | -1.2  | 0.5433 | -1.2  | 0.4629 | 1.27  | 0.2508 |
| 95294_at   | 1419789_at   | ---       | MKIAA0167 protein                                | 1.33  | 0.58 | 1.13  | 0.6302 | -1.01 | 0.932  | 1.07  | 0.6467 | 1.18  | 0.4893 |
| 95295_s_at | 1419538_at   | Flt3      | FMS-like tyrosine kinase 3                       | -1.31 | 0.19 | 1.03  | 0.7261 | -1.07 | 0.3483 | -1    | 0.9622 | 1.29  | 0.0814 |
| 95297_at   | 1420565_at   | Hoxa1     | homeo box A1                                     | 1.42  | 0.06 | 1.1   | 0.519  | -1.01 | 0.9333 | 1.02  | 0.8862 | 1.37  | 0.2179 |
| 95298_at   | 1425574_at   | Epha3     | Eph receptor A3                                  | -1.14 | 0.86 | -1.23 | 0.3948 | -1.12 | 0.5793 | -1.46 | 0.2331 | 1.05  | 0.9295 |
| 95300_at   | 1449924_at   | Prg3      | proteoglycan 3                                   | -1.95 | 0.11 | 1.36  | 0.3847 | 1.48  | 0.1817 | 1.09  | 0.7903 | 1.48  | 0.2199 |
| 95301_at   | 1449927_at   | S100a5    | S100 calcium binding protein A5                  | -1.01 | 0.98 | -1.52 | 0.0794 | -1.13 | 0.6069 | -1.26 | 0.434  | 1.3   | 0.4297 |
| 95302_at   | 1436267_a_at | Frap1     | FK506 binding protein 12-rapamycin associ        | -1.19 | 0.08 | -1.04 | 0.5282 | 1.07  | 0.5148 | -1.02 | 0.8129 | 1.13  | 0.5707 |
| 95303_at   | 1440865_at   | Ifitm6    | interferon induced transmembrane protein 6       | -1.12 | 0.67 | 1.18  | 0.17   | -1.02 | 0.7433 | 1.2   | 0.2492 | 1.18  | 0.4502 |
| 95304_at   | 1421785_at   | Attp      | signaling molecule ATTP                          | -2.54 | 0.17 | -1.19 | 0.4536 | 1.3   | 0.4169 | 1.18  | 0.5404 | 2.51  | 0.0856 |
| 95305_at   | 1460745_at   | ---       | ---                                              | -1.85 | 0.11 | -1.08 | 0.5046 | -1.03 | 0.786  | -1.07 | 0.5798 | 1.2   | 0.2922 |
| 95306_at   | 1451863_at   | Uts2r     | urotensin 2 receptor                             | 1.21  | 0.38 | -1.05 | 0.5406 | 1.05  | 0.491  | -1.03 | 0.639  | 1.25  | 0.1026 |
| 95308_at   | 1418098_at   | Adcy4     | adenylate cyclase 4                              | -1.36 | 0.01 | -1.09 | 0.2605 | -1.08 | 0.4132 | -1.26 | 0.0292 | 1.57  | 0.1602 |
| 95310_at   | 1421161_at   | Btc       | betacellulin, epidermal growth factor family r   | -2.01 | 0.23 | -1.36 | 0.454  | -1.87 | 0.1561 | 1.44  | 0.3672 | -1.74 | 0.5342 |
| 95312_at   | 1450832_at   | Hoxc5     | homeo box C5                                     | -1.63 | 0.05 | -1.21 | 0.477  | 1.19  | 0.4471 | -1.33 | 0.3743 | 1.69  | 0.1595 |
| 95316_at   | 1449545_at   | Fgf18     | fibroblast growth factor 18                      | 1.52  | 0.36 | -1.09 | 0.8451 | 1.07  | 0.873  | 1.61  | 0.1946 | 1.07  | 0.8788 |
| 95317_at   | 1422023_at   | Bsn       | bassoon                                          | -1.42 | 0.62 | 1     | 0.9947 | 1.08  | 0.6277 | 1.04  | 0.8133 | 1.25  | 0.2997 |
| 95318_at   | 1460252_s_at | Zfp105    | zinc finger protein 105                          | -1.86 | 0    | -1.2  | 0.0171 | -1.05 | 0.4844 | -1.11 | 0.144  | 1.22  | 0.2686 |
| 95319_at   | 1420799_at   | Ntsr1     | neurotensin receptor 1                           | -1.31 | 0.18 | 1.15  | 0.1262 | 1.22  | 0.03   | 1.01  | 0.9081 | 1.06  | 0.746  |
| 95320_at   | 1420788_at   | Klrg1     | killer cell lectin-like receptor subfamily G, me | -1.85 | 0.07 | 1.87  | 0.1355 | 1.13  | 0.6963 | 1.7   | 0.2248 | -1.26 | 0.6473 |
| 95322_g_at | 1427654_a_at | Htr4      | 5 hydroxytryptamine (serotonin) receptor 4       | -1.73 | 0.02 | -1.13 | 0.2072 | -1.05 | 0.5477 | -1.13 | 0.2739 | 1.38  | 0.0242 |
| 95324_at   | 1420402_at   | Atp2b2    | ATPase, Ca++ transporting, plasma membr          | 1.15  | 0.02 | 1.09  | 0.7686 | 1.53  | 0.0852 | -1.02 | 0.9474 | 1.34  | 0.0863 |
| 95325_at   | 1448997_at   | Pscd1     | pleckstrin homology, Sec7 and coiled-coil dc     | -1.59 | 0.42 | -1.07 | 0.4875 | -1.25 | 0.32   | -1.49 | 0.0418 | -1.18 | 0.7137 |
| 95326_at   | 1460717_at   | Tspyl1    | testis-specific protein, Y-encoded-like 1        | -1.86 | 0.12 | -1.05 | 0.7533 | 1.04  | 0.8125 | -1.22 | 0.1397 | 1.46  | 0.064  |
| 95327_at   | 1422163_at   | Sh3md1    | SH3 multiple domains 1                           | -1.1  | 0.54 | 1.15  | 0.2178 | 1.15  | 0.1982 | 1.05  | 0.5162 | 1.35  | 0.0927 |
| 95328_at   | 1450771_at   | Fut9      | fucosyltransferase 9                             | -1.28 | 0.75 | -1.09 | 0.8092 | 1.52  | 0.3316 | 2.38  | 0.1572 | -1.1  | 0.8934 |
| 95329_at   | 1450139_at   | Ern2      | endoplasmic reticulum (ER) to nucleus signa      | -2.5  | 0.14 | 1.08  | 0.4155 | 1.21  | 0.1811 | -1.01 | 0.8695 | 1.53  | 0.1613 |
| 95330_at   | 1423529_at   | G6pc2     | glucose-6-phosphatase, catalytic, 2              | -1.43 | 0.42 | 1.27  | 0.1917 | 1.26  | 0.1415 | 1.26  | 0.1418 | 1.03  | 0.9354 |
| 95331_at   | 1422832_at   | Rgr       | retinal G protein coupled receptor               | -4.68 | 0.26 | 1.37  | 0.3197 | 1.42  | 0.0674 | 2.42  | 0.0495 | 1.52  | 0.3622 |
| 95332_at   | 1422125_at   | Htr2b     | 5-hydroxytryptamine (serotonin) receptor 2B      | -1.89 | 0.49 | -1.09 | 0.699  | 1.01  | 0.9805 | -1.06 | 0.7689 | -1.43 | 0.2148 |
| 95333_at   | 1421291_at   | Il18rap   | interleukin 18 receptor accessory protein        | -1.19 | 0.46 | 1.42  | 0.306  | 1.85  | 0.037  | 1.85  | 0.0569 | 1.25  | 0.3832 |
| 95334_at   | 1422329_a_at | Ntrk3     | neurotrophic tyrosine kinase, receptor, type     | 2.2   | 0.02 | 1.29  | 0.3922 | -1.11 | 0.6977 | 1.21  | 0.3864 | 1.03  | 0.9085 |
| 95335_at   | 1450019_at   | Cx3cr1    | chemokine (C-X3-C) receptor 1                    | -1.19 | 0.45 | -1.06 | 0.53   | -1.03 | 0.7084 | -1.22 | 0.1244 | -1.25 | 0.3646 |
| 95336_at   | 1421572_at   | Hif3a     | hypoxia inducible factor 3, alpha subunit        | -2.34 | 0.09 | 1.04  | 0.5909 | 1.03  | 0.7173 | -1    | 0.9987 | 1.15  | 0.5098 |
| 95339_r_at | 1449153_at   | Mmp12     | matrix metalloproteinase 12                      | -1.15 | 0.62 | 1.8   | 0.3735 | -1.71 | 0      | 1.84  | 0.2715 | 1.5   | 0.3784 |
| 95340_at   | 1420575_at   | Mt3       | metallothionein 3                                | 1.43  | 0.15 | -1.13 | 0.4274 | -1.06 | 0.665  | -1.1  | 0.5136 | 1.64  | 0.0245 |
| 95342_at   | 1427675_at   | V1ra2     | vomer nasal 1 receptor, A2                       | -5.09 | 0    | -1.35 | 0.4902 | -1.36 | 0.5261 | -1.62 | 0.332  | -1.02 | 0.9816 |
| 95343_at   | 1419323_at   | Padi1     | peptidyl arginine deiminase, type I              | -1.68 | 0.42 | 1.09  | 0.656  | -1.06 | 0.5308 | -1.11 | 0.28   | 1.8   | 0.2436 |
| 95344_at   | 1422177_at   | Il13ra2   | interleukin 13 receptor, alpha 2                 | 1.81  | 0.04 | -2.14 | 0.0286 | -1.04 | 0.889  | -1.25 | 0.4949 | 1.29  | 0.5083 |
| 95345_at   | 1423311_s_at | Tpbp      | trophoblast glycoprotein                         | 1.22  | 0.57 | 1.05  | 0.7215 | 1.1   | 0.6098 | -1.44 | 0.0591 | 1.12  | 0.7565 |
| 95346_at   | 1426137_at   | Rex2      | reduced expression 2                             | -7.1  | 0.13 | -1.26 | 0.4866 | 1.36  | 0.4508 | -1.32 | 0.4219 | -1.4  | 0.377  |
| 95347_at   | 1422773_at   | Myt1      | myelin transcription factor 1                    | -1.18 | 0.46 | 1.04  | 0.8255 | -1.12 | 0.5685 | 1.63  | 0.4052 | 1.64  | 0.1133 |
| 95349_g_at | 1419209_at   | ---       | ---                                              | 2.7   | 0.02 | 4.09  | 0      | -1.07 | 0.6797 | 4.22  | 0.002  | 1.17  | 0.6301 |
| 95352_at   | 1459932_at   | D8Ertd28e | DNA segment, Chr 8, ERATO Doi 28, expre          | -1.55 | 0.31 | -1.02 | 0.8518 | 1.36  | 0.3886 | 1.43  | 0.1609 | 1.56  | 0.2576 |
| 95353_at   | 1439973_at   | LOC434427 | LOC434427                                        | -1.35 | 0.01 | -1.13 | 0.5399 | 1.09  | 0.6993 | -1.16 | 0.5077 | -1.65 | 0.2601 |
| 95356_at   | 1432466_a_at | Apoe      | apolipoprotein E                                 | -1.16 | 0.57 | 1.03  | 0.1011 | 1.02  | 0.3182 | 1.01  | 0.6502 | 1.32  | 0.0477 |
| 95358_at   | 1449404_at   | Pip5k2a   | phosphatidylinositol-4-phosphate 5-kinase, t     | 1.11  | 0.74 | -1.05 | 0.6485 | -1.18 | 0.0121 | 1.02  | 0.8792 | 1.25  | 0.2983 |
| 95359_at   | 1416364_at   | Hspcb     | heat shock protein 1, beta                       | -1.41 | 0.01 | -1.29 | 0.0028 | -1.09 | 0.3212 | -1.45 | 0.0001 | -1.15 | 0.1729 |
| 95360_at   | 1441986_at   | Zcchc6    | zinc finger, CCHC domain containing 6            | -1.15 | 0.71 | -1.26 | 0.2326 | -1.28 | 0.1592 | -1.34 | 0.1174 | 1.07  | 0.9335 |

|            |              |               |                                                       |       |      |       |        |       |        |       |        |       |        |
|------------|--------------|---------------|-------------------------------------------------------|-------|------|-------|--------|-------|--------|-------|--------|-------|--------|
| 95363_at   | 1449501_a_at | Gzmm          | granzyme M (lymphocyte met-ase 1)                     | 3.31  | 0.01 | 1.22  | 0.4631 | -1.17 | 0.2734 | 1.01  | 0.967  | 1.25  | 0.6464 |
| 95364_at   | 1449848_at   | Gna14         | guanine nucleotide binding protein, alpha 14          | -1.18 | 0.6  | -5.94 | 0      | -1.75 | 0.073  | -6.66 | 0      | -5.49 | 0.0009 |
| 95368_at   | 1451753_at   | Plxna2        | plexin A2                                             | 1.37  | 0.45 | -1.46 | 0.0759 | 1.02  | 0.9273 | -1.1  | 0.6516 | -1.24 | 0.2849 |
| 95371_g_at | 1449637_at   | Cdh4          | Cadherin 4                                            | -1.97 | 0.33 | 1.06  | 0.8214 | -1.21 | 0.4741 | -1.02 | 0.9425 | 1.38  | 0.354  |
| 95372_at   | 1419847_at   | AW539964      | Protein serine kinase H1                              | -1.52 | 0.31 | 1.17  | 0.6024 | 1.68  | 0.1403 | 1.18  | 0.574  | 1.51  | 0.436  |
| 95373_at   | 1418770_at   | Cd2           | CD2 antigen                                           | -1.33 | 0.16 | 1.23  | 0.1944 | 1.23  | 0.2765 | 1.3   | 0.0747 | -1.24 | 0.6457 |
| 95376_at   | 1427591_at   | Clcn1         | Chloride channel 1                                    | -1.86 | 0.24 | -1.74 | 0.1394 | 1.1   | 0.8198 | 1.22  | 0.6028 | 1.23  | 0.1589 |
| 95377_at   | 1439959_at   | Fgf11         | Fibroblast growth factor 11                           | 1.04  | 0.92 | 1.06  | 0.6742 | 1.17  | 0.1866 | -1.04 | 0.7417 | 1.34  | 0.4372 |
| 95378_at   | 1448034_at   | AI842396      | expressed sequence AI842396                           | 1.16  | 0.68 | -1.03 | 0.6805 | 1.14  | 0.2491 | 1.09  | 0.4906 | -1.15 | 0.4915 |
| 95379_at   | 1418934_at   | Mab2112       | mab-21-like 2 (C. elegans)                            | -1.39 | 0.29 | -1.26 | 0.0817 | 1.02  | 0.8709 | -1.24 | 0.1353 | 1.2   | 0.6756 |
| 95380_at   | 1449991_at   | Cd244         | CD244 natural killer cell receptor 2B4                | -1.52 | 0.24 | 1.13  | 0.4945 | 1.31  | 0.1285 | 1.44  | 0.1374 | 1.09  | 0.7815 |
| 95381_at   | 1425437_a_at | Kcnk7         | potassium channel, subfamily K, member 7              | 1.41  | 0.36 | -1.09 | 0.3571 | -1    | 0.999  | -1.15 | 0.1608 | -1.07 | 0.6483 |
| 95382_at   | 1459922_at   | AI646383      | expressed sequence AI646383                           | 1.05  | 0.92 | -1.13 | 0.4014 | 1.12  | 0.3633 | 1.28  | 0.1276 | -1.17 | 0.7401 |
| 95385_at   | 1456672_at   | AA408556      | Expressed sequence AA408556                           | -1.77 | 0.01 | -1.11 | 0.1861 | 1.04  | 0.4692 | -1.08 | 0.2552 | -1.01 | 0.9578 |
| 95386_at   | 1434690_at   | Lycat         | lysocardiolipin acyltransferase                       | 1.21  | 0.48 | 1.14  | 0.273  | 1.08  | 0.517  | 1.06  | 0.6509 | 1.27  | 0.5035 |
| 95389_at   | 1451763_at   | Cnga1         | cyclic nucleotide gated channel alpha 1               | -1.48 | 0.21 | -1.01 | 0.9358 | 1.02  | 0.9192 | 1.34  | 0.0383 | 1.48  | 0.2813 |
| 95390_at   | 1421036_at   | Npas2         | neuronal PAS domain protein 2                         | -1.09 | 0.7  | -1.11 | 0.3671 | -1.25 | 0.095  | -1.01 | 0.9542 | -1    | 1      |
| 95391_at   | 1421774_at   | Vax1          | ventral anterior homeobox containing gene 1           | -1.14 | 0.72 | -1.05 | 0.6327 | -1.09 | 0.3033 | -1.09 | 0.3555 | 1.02  | 0.9644 |
| 95392_at   | 1450238_at   | Gcnt2         | glucosaminyl (N-acetyl) transferase 2, I-brar         | -2.95 | 0.35 | -1.1  | 0.6937 | 1.21  | 0.2955 | -1.71 | 0.053  | -2.27 | 0.1045 |
| 95393_at   | 1425660_at   | Btb3          | BTB (POZ) domain containing 3                         | -1.15 | 0.29 | -1.07 | 0.2755 | -1.09 | 0.3066 | -1.19 | 0.0397 | -1.04 | 0.7698 |
| 95395_at   | 1426840_at   | Ythdf3        | YTH domain family 3                                   | 1.1   | 0.44 | 1.19  | 0.051  | 1.15  | 0.1618 | 1.15  | 0.0815 | 1.12  | 0.5635 |
| 95396_at   | 1427585_at   | ---           | ---                                                   | -2.62 | 0.08 | 1     | 0.9919 | 1.28  | 0.6686 | 1.02  | 0.9575 | 2.36  | 0.2795 |
| 95397_at   | 1455447_at   | D430019H16Rik | RIKEN cDNA D430019H16 gene                            | 1.03  | 0.89 | -1.3  | 0.0048 | 1.08  | 0.3913 | -1.08 | 0.3755 | 1.5   | 0.3764 |
| 95398_at   | 1419849_at   | E130014H08Rik | RIKEN cDNA E130014H08 gene                            | 1.1   | 0.86 | 1.03  | 0.8017 | 1.1   | 0.2061 | 1.08  | 0.5626 | 1.43  | 0.2558 |
| 95399_at   | 1419771_at   | Dchs2         | Dachsous 2 (Drosophila)                               | 1.19  | 0.75 | -2.74 | 0.017  | -1.24 | 0.5455 | -1.46 | 0.2615 | -1.08 | 0.7734 |
| 95401_at   | 1452164_at   | BC038286      | cDNA sequence BC038286                                | -1.3  | 0.09 | 1.07  | 0.4042 | -1.01 | 0.9282 | -1.02 | 0.6995 | 1.11  | 0.4013 |
| 95404_at   | 1422792_at   | Pafah1b2      | platelet-activating factor acetylhydrolase, isoform 2 | -1.02 | 0.92 | 1.13  | 0.2723 | 1.18  | 0.0805 | 1.19  | 0.0323 | 1.41  | 0.1971 |
| 95405_at   | 1416181_at   | Mesdc2        | mesoderm development candidate 2                      | 1.11  | 0.74 | -1.1  | 0.2294 | -1.03 | 0.8196 | -1.21 | 0.0245 | 1.13  | 0.288  |
| 95406_at   | 1424365_at   | 1810037117Rik | RIKEN cDNA 1810037117 gene                            | -1.13 | 0.63 | -1.12 | 0.0941 | 1.08  | 0.4515 | -1.17 | 0.0484 | -1.1  | 0.359  |
| 95407_at   | 1454638_a_at | Pah           | phenylalanine hydroxylase                             | -1.04 | 0.47 | 1.03  | 0.6609 | -1.04 | 0.5374 | 1.05  | 0.3737 | 1.28  | 0.068  |
| 95408_at   | 1423206_s_at | 2310003F16Rik | RIKEN cDNA 2310003F16 gene                            | 1.16  | 0.32 | 1.01  | 0.8316 | 1.07  | 0.3963 | 1.05  | 0.284  | -1.1  | 0.3994 |
| 95409_at   | 1415733_a_at | 1110019J04Rik | RIKEN cDNA 1110019J04 gene                            | 1.18  | 0.58 | -1.03 | 0.4511 | -1.04 | 0.5468 | -1.07 | 0.0954 | -1    | 0.9912 |
| 95412_at   | 1416027_at   | Pdcd6         | programmed cell death 6                               | 1.55  | 0.04 | 1.08  | 0.1236 | -1.04 | 0.738  | 1.05  | 0.3592 | -1.29 | 0.0231 |
| 95413_at   | 1449889_a_at | Ociad1        | OCIA domain containing 1                              | -1.12 | 0.11 | -1.02 | 0.6647 | -1.11 | 0.0833 | -1.05 | 0.2937 | 1.16  | 0.2269 |
| 95417_at   | 1426350_at   | Mgat2         | mannoside acetylglucosaminyltransferase 2             | 1.28  | 0.1  | -1.12 | 0.1257 | 1.25  | 0.0765 | -1.07 | 0.3952 | -1.29 | 0.3067 |
| 95418_at   | 1423854_a_at | Rasl11b       | RAS-like, family 11, member B                         | -1.05 | 0.85 | 1.18  | 0.1195 | -1.02 | 0.8785 | -1.09 | 0.5278 | 1.34  | 0.0605 |
| 95419_at   | 1423702_at   | H1f0          | H1 histone family, member 0                           | 1.11  | 0.52 | -1.03 | 0.7036 | 1     | 0.9879 | -1.06 | 0.3983 | -1.31 | 0.0054 |
| 95420_at   | 1423706_a_at | ---           | ---                                                   | -1.08 | 0.65 | -1.2  | 0.0836 | -1.16 | 0.0444 | -1.14 | 0.2302 | -1.44 | 0.2121 |
| 95423_at   | 1416497_at   | Cai           | calcium binding protein, intestinal                   | -2.75 | 0.03 | -1.21 | 0.0613 | -1.37 | 0.0561 | -1.41 | 0.0106 | -1.76 | 0.0514 |
| 95424_at   | 1422457_s_at | Sumo3         | SMT3 suppressor of mif two 3 homolog 3 (yeast)        | -1.19 | 0.27 | -1.08 | 0.1651 | -1.08 | 0.1299 | -1.17 | 0.039  | -1.36 | 0.0166 |
| 95427_at   | 1423293_at   | Rpa1          | replication protein A1                                | 1.53  | 0.02 | 1.02  | 0.8059 | -1.23 | 0.0499 | 1.17  | 0.1295 | -1.09 | 0.3994 |
| 95428_at   | 1426213_at   | Imp4          | IMP4, U3 small nucleolar ribonucleoprotein, subunit 4 | -1.17 | 0.55 | 1.1   | 0.4742 | 1.04  | 0.7754 | 1.1   | 0.4768 | 1.05  | 0.8316 |
| 95431_at   | 1426676_s_at | Tom70a        | translocase of outer mitochondrial membrane           | -1.06 | 0.84 | -1.01 | 0.9537 | -1.03 | 0.6889 | -1.09 | 0.3373 | -1.42 | 0.0075 |
| 95432_f_at | 1426675_at   | Tom70a        | translocase of outer mitochondrial membrane           | 1.05  | 0.86 | 1.02  | 0.6652 | -1    | 0.9933 | -1.02 | 0.645  | 1.04  | 0.6639 |
| 95433_at   | 1460396_at   | Ddx54         | DEAD (Asp-Glu-Ala-Asp) box polypeptide 54             | 1.17  | 0.24 | -1.16 | 0.0199 | 1.07  | 0.3762 | -1.05 | 0.4722 | 1.04  | 0.8477 |
| 95434_at   | 1448279_at   | Arpc3         | actin related protein 2/3 complex, subunit 3          | 1.55  | 0.08 | 1.01  | 0.8593 | -1.59 | 0.0032 | -1.34 | 0.0227 | -1.13 | 0.3256 |
| 95436_at   | 1417954_at   | Sst           | somatostatin                                          | 2.17  | 0.14 | 1.52  | 0.0032 | 1.71  | 0.0296 | 1.75  | 0.1481 | 2.44  | 0.1105 |
| 95437_at   | 1426912_at   | Rfwd2         | ring finger and WD repeat domain 2                    | 1.54  | 0.16 | -1.08 | 0.443  | -1.08 | 0.497  | -1.13 | 0.3454 | -1.07 | 0.5992 |
| 95438_at   | 1423533_a_at | Rhot1         | ras homolog gene family, member T1                    | 1.91  | 0.02 | -1.08 | 0.3246 | 1.12  | 0.0669 | 1.09  | 0.352  | 1.14  | 0.5037 |
| 95439_at   | 1448813_at   | Aadac         | arylacetamide deacetylase (esterase)                  | 1.1   | 0.72 | -1.28 | 0.1013 | -1.11 | 0.4165 | -1.2  | 0.0203 | -1.47 | 0.013  |
| 95440_at   | 1423679_at   | 2810432L12Rik | RIKEN cDNA 2810432L12 gene                            | -1.46 | 0.17 | -1.03 | 0.898  | -1.28 | 0.1634 | -1.14 | 0.4303 | 1.12  | 0.7579 |
| 95441_at   | 1416485_at   | Timm23        | translocase of inner mitochondrial membrane           | 1.39  | 0.13 | -1.1  | 0.0188 | -1.06 | 0.2119 | -1.05 | 0.5673 | -1.43 | 0.0005 |
| 95444_at   | 1423722_at   | 4930579A11Rik | RIKEN cDNA 4930579A11 gene                            | -1.33 | 0.11 | 1.23  | 0.0095 | 1.18  | 0.1174 | 1.49  | 0.0017 | -1.27 | 0.0086 |



|            |              |               |                                                        |       |      |       |        |       |        |       |        |       |        |
|------------|--------------|---------------|--------------------------------------------------------|-------|------|-------|--------|-------|--------|-------|--------|-------|--------|
| 95445_at   | 1448100_at   | 4833439L19Rik | RIKEN cDNA 4833439L19 gene                             | 1.18  | 0.23 | -1.18 | 0.0401 | 1.03  | 0.6554 | -1.14 | 0.0895 | -1.27 | 0.0581 |
| 95446_at   | 1425194_a_at | 6330577E15Rik | RIKEN cDNA 6330577E15 gene                             | 1.12  | 0.61 | -1.02 | 0.5962 | 1.24  | 0.0001 | 1.1   | 0.0719 | -1.2  | 0.1338 |
| 95447_at   | 1450067_a_at | 1810034K20Rik | RIKEN cDNA 1810034K20 gene                             | 1.74  | 0.03 | -1.05 | 0.4989 | -1.03 | 0.7352 | -1.1  | 0.1898 | -1.15 | 0.1799 |
| 95448_at   | 1426611_at   | Psmc2         | proteasome (prosome, macropain) 26S subunit 2          | 1.32  | 0.35 | -1    | 0.9557 | 1.02  | 0.7699 | 1.03  | 0.5284 | -1.84 | 0.001  |
| 95449_at   | 1451523_a_at | 2310075G12Rik | RIKEN cDNA 2310075G12 gene                             | -1.3  | 0.25 | -1.28 | 0.0029 | -1.28 | 0.0037 | -1.38 | 0.0006 | -1.29 | 0.1117 |
| 95451_at   | 1416445_at   | 2810405J04Rik | RIKEN cDNA 2810405J04 gene                             | 1.52  | 0.23 | -1.14 | 0.1309 | 1.04  | 0.6595 | -1.13 | 0.1508 | -1.28 | 0.121  |
| 95453_f_at | 1419814_s_at | S100a1        | S100 calcium binding protein A1                        | 1.56  | 0.25 | 1.32  | 0.0001 | 1.06  | 0.3154 | 1.38  | 0.0013 | -1.11 | 0.5107 |
| 95456_r_at | 1418574_a_at | Shfdg1        | split hand/foot deleted gene 1                         | 1.05  | 0.88 | -1.1  | 0.1515 | 1.02  | 0.7835 | -1.12 | 0.0293 | -1.27 | 0.141  |
| 95457_at   | 1437290_at   | 1110001C20Rik | RIKEN cDNA 1110001C20 gene                             | 1.14  | 0.52 | 1.15  | 0.0002 | 1.18  | 0.0581 | 1.25  | 0.0031 | -1.19 | 0.1769 |
| 95458_s_at | 1437288_at   | 1110001C20Rik | RIKEN cDNA 1110001C20 gene                             | -1    | 1    | 1.01  | 0.9552 | -1.59 | 0.0025 | -1.35 | 0.0504 | -1.23 | 0.032  |
| 95460_at   | 1460171_at   | Cops5         | COP9 (constitutive photomorphogenic) homolog 5         | 1.43  | 0.01 | 1.07  | 0.304  | -1.09 | 0.3031 | 1.05  | 0.5321 | -1.28 | 0.0567 |
| 95465_s_at | 1417611_at   | Tmem37        | transmembrane protein 37                               | -1.36 | 0.42 | -1.51 | 0.0002 | -1.38 | 0.0059 | -1.7  | 0      | -1.59 | 0.0329 |
| 95467_at   | 1416267_at   | Scoc          | short coiled-coil protein                              | 1.28  | 0.25 | -1.1  | 0.2467 | -1.03 | 0.7412 | 1.14  | 0.1388 | 1.53  | 0.0542 |
| 95468_at   | 1423785_at   | Egln1         | EGL nine homolog 1 (C. elegans)                        | 1.43  | 0.18 | 1.04  | 0.5837 | -1.04 | 0.6733 | -1.05 | 0.6098 | -1.37 | 0.1381 |
| 95469_at   | 1417987_at   | Btd           | biotinidase                                            | -1.38 | 0.04 | -1.38 | 0.0078 | -1.12 | 0.3266 | -1.58 | 0.0001 | -1.22 | 0.082  |
| 95470_at   | 1423766_at   | Pak1ip1       | PAK1 interacting protein 1                             | 2.26  | 0.05 | 1.31  | 0.005  | 1.19  | 0.2407 | 1.31  | 0.0064 | -1.04 | 0.894  |
| 95471_at   | 1417649_at   | Cdkn1c        | cyclin-dependent kinase inhibitor 1C (P57)             | 3.04  | 0    | 1.51  | 0.0162 | 1.41  | 0.0224 | 1.78  | 0.0028 | 2.49  | 0.001  |
| 95472_f_at | 1416337_at   | Uqcrb         | ubiquinol-cytochrome c reductase binding protein       | 1.45  | 0.04 | -1.01 | 0.8942 | 1.15  | 0.2188 | 1.02  | 0.7322 | 1.01  | 0.9631 |
| 95474_at   | 1437308_s_at | F2r           | coagulation factor II (thrombin) receptor              | 1.25  | 0.58 | 1.31  | 0.0012 | -1.11 | 0.0053 | 1.44  | 0.0138 | 1.12  | 0.4272 |
| 95478_at   | 1427955_a_at | Deb1          | differentially expressed in B16F10 1                   | 1.51  | 0.08 | -1.03 | 0.6146 | 1.14  | 0.2343 | 1.01  | 0.8677 | -1.13 | 0.4461 |
| 95479_at   | 1448505_at   | MGI:1927354   | nuclear DNA binding protein                            | 1.68  | 0.35 | 1.12  | 0.5159 | -1.06 | 0.7308 | 1.14  | 0.391  | -1.54 | 0.0289 |
| 95480_at   | 1428621_a_at | D11Wsu68e     | DNA segment, Chr 11, Wayne State University            | -1.04 | 0.72 | -1.07 | 0.189  | -1.02 | 0.7233 | -1.02 | 0.7355 | -1.29 | 0.4075 |
| 95482_at   | 1419920_s_at | Usp7          | ubiquitin specific protease 7                          | 1.27  | 0.18 | 1.18  | 0.0085 | 1.13  | 0.041  | 1.14  | 0.0066 | 1.19  | 0.1301 |
| 95485_at   | 1460184_at   | Hadhsc        | L-3-hydroxyacyl-Coenzyme A dehydrogenase               | 1.4   | 0.08 | 1.01  | 0.8472 | 1     | 0.9937 | -1.04 | 0.4084 | -1.01 | 0.8607 |
| 95486_at   | 1420056_s_at | Ptdsr         | phosphatidylserine receptor                            | 1.48  | 0.05 | -1.26 | 0.0013 | -1.04 | 0.6139 | -1.24 | 0.0042 | 1.06  | 0.6191 |
| 95489_at   | 1416044_at   | Fliih         | flightless I homolog (Drosophila)                      | 1.6   | 0.11 | 1.15  | 0.0041 | 1.16  | 0.0061 | 1.15  | 0.0237 | 1.04  | 0.8339 |
| 95490_at   | 1460211_a_at | Kdelr1        | KDEL (Lys-Asp-Glu-Leu) endoplasmic reticulum chaperone | -1.14 | 0.35 | -1.04 | 0.3357 | -1.11 | 0.0452 | -1.26 | 0      | -1.12 | 0.1128 |
| 95491_at   | 1456194_a_at | Park7         | Parkinson disease (autosomal recessive, early onset)   | 1.68  | 0.05 | -1.04 | 0.4228 | -1.09 | 0.2132 | -1.02 | 0.804  | -1.12 | 0.5817 |
| 95493_at   | 1448590_at   | Col6a1        | collagen, type VI, alpha 1                             | -1.27 | 0.11 | -1.1  | 0.3033 | -1.01 | 0.8811 | -1    | 0.9885 | 1.43  | 0.0075 |
| 95496_at   | 1428182_at   | Prpsap1       | phosphoribosyl pyrophosphate synthetase-ase 1          | 1.4   | 0.1  | 1.03  | 0.6763 | 1.21  | 0.0907 | 1.41  | 0      | -1.72 | 0.0743 |
| 95497_at   | 1426612_at   | MGI:1921571   | timeless interacting protein                           | 4.51  | 0.03 | 1.42  | 0.0288 | 1.4   | 0.14   | 1.4   | 0.0464 | 1.12  | 0.6352 |
| 95501_at   | 1424564_at   | 2410001C21Rik | RIKEN cDNA 2410001C21 gene                             | 1.3   | 0.14 | 1.1   | 0.3144 | 1     | 0.9902 | 1.18  | 0.0286 | -1.37 | 0.0073 |
| 95502_at   | 1423507_a_at | Sirt2         | sirtuin 2 (silent mating type information regulator 2) | 1.29  | 0.44 | -1.1  | 0.2116 | -1.15 | 0.1501 | -1.09 | 0.1978 | -1.04 | 0.7535 |
| 95503_at   | 1416313_at   | AI839562      | expressed sequence AI839562                            | -2.66 | 0.15 | -1.03 | 0.897  | -1.03 | 0.8645 | -1.22 | 0.3187 | 1.2   | 0.7576 |
| 95505_at   | 1448848_at   | ---           | ---                                                    | 1.54  | 0.15 | -1    | 0.9334 | 1.07  | 0.1792 | 1.05  | 0.5124 | 1.14  | 0.2609 |
| 95506_at   | 1419649_s_at | Myo1c         | myosin IC                                              | 1.69  | 0.35 | 1.39  | 0.3162 | 2.14  | 0.0104 | 1.93  | 0.0081 | 2.59  | 0.121  |
| 95507_at   | 1416052_at   | Prps1         | phosphoribosyl pyrophosphate synthetase 1              | 1.19  | 0.46 | 1.04  | 0.5421 | 1.01  | 0.823  | -1.04 | 0.4377 | -1.04 | 0.4904 |
| 95508_at   | 1452196_a_at | Nckap1        | NCK-associated protein 1                               | 1.12  | 0.54 | 1     | 0.9748 | 1.07  | 0.3108 | 1.04  | 0.6181 | -1.12 | 0.306  |
| 95509_at   | 1451228_a_at | Sync          | syncollin                                              | -1.09 | 0.89 | 1.52  | 0.2139 | 1.2   | 0.227  | 1.28  | 0.1965 | 1.11  | 0.7837 |
| 95511_at   | 1422445_at   | Itga6         | integrin alpha 6                                       | 1.5   | 0.6  | -1.23 | 0.5666 | 1.07  | 0.8237 | -1.05 | 0.873  | 1.24  | 0.68   |
| 95513_at   | 1415774_at   | Statip1       | signal transducer and activator of transcription 1     | 1.89  | 0.13 | 1     | 0.949  | 1.1   | 0.4325 | 1.15  | 0.1263 | 1.04  | 0.8453 |
| 95514_at   | 1426897_at   | 2610510H01Rik | RIKEN cDNA 2610510H01 gene                             | 1.86  | 0.29 | -1.01 | 0.9501 | 1.14  | 0.4908 | 1.02  | 0.9224 | -1.24 | 0.3068 |
| 95516_at   | 1448391_at   | Rab9          | RAB9, member RAS oncogene family                       | -1.09 | 0.53 | 1.09  | 0.2148 | 1.29  | 0.002  | 1.1   | 0.195  | -1.29 | 0.0864 |
| 95518_at   | 1424683_at   | 1810015C04Rik | RIKEN cDNA 1810015C04 gene                             | 1.61  | 0.07 | 1.3   | 0.0047 | 1.33  | 0.0889 | 1.63  | 0      | 2.9   | 0.0002 |
| 95520_at   | 1417162_at   | 2310061B02Rik | RIKEN cDNA 2310061B02 gene                             | 1.55  | 0.02 | 1.1   | 0.327  | 1.02  | 0.8172 | 1.03  | 0.7598 | 1.01  | 0.9245 |
| 95522_i_at | 1448760_at   | Zfp68         | zinc finger protein 68                                 | 1.5   | 0.16 | 1.33  | 0.0086 | 1.28  | 0.1165 | 1.4   | 0.0037 | 1.41  | 0.0784 |
| 95523_at   | 1428333_at   | 6530401D17Rik | RIKEN cDNA 6530401D17 gene                             | 2.73  | 0    | -1.42 | 0.0069 | -1.14 | 0.4045 | -1.11 | 0.316  | -1.11 | 0.691  |
| 95525_at   | 1423374_at   | Ncoa6         | nuclear receptor coactivator 6                         | 1.21  | 0.16 | 1.25  | 0.0031 | 1.22  | 0.126  | 1.22  | 0.0173 | 1.57  | 0.2365 |
| 95526_at   | 1415682_at   | Xpo7          | exportin 7                                             | 1.12  | 0.17 | 1.2   | 0.0082 | 1.08  | 0.2832 | 1.11  | 0.0207 | -1.26 | 0.0352 |
| 95528_at   | 1419840_at   | AI507495      | expressed sequence AI507495                            | -1.77 | 0    | -1.09 | 0.4661 | -1.01 | 0.9231 | -1.04 | 0.755  | 1.59  | 0.3341 |
| 95530_at   | 1454631_at   | 6330549H03Rik | RIKEN cDNA 6330549H03 gene                             | -1.1  | 0.68 | 1.09  | 0.2204 | 1     | 0.9964 | 1.08  | 0.1183 | 1.05  | 0.4932 |
| 95531_at   | 1454890_at   | Amot          | angiominin                                             | 1.13  | 0.5  | 1.17  | 0.1851 | 1.28  | 0.0307 | 1.64  | 0.0004 | 1.34  | 0.0248 |
| 95532_at   | 1439771_s_at | LOC236374     | similar to 2-cell-stage, variable group, member 1      | 1.02  | 0.88 | -1.32 | 0.0956 | -1.36 | 0.0541 | -1.31 | 0.0746 | 2.61  | 0.1165 |

|            |              |               |                                                  |        |      |        |        |       |        |        |        |        |        |
|------------|--------------|---------------|--------------------------------------------------|--------|------|--------|--------|-------|--------|--------|--------|--------|--------|
| 95533_at   | 1425332_at   | Zfp106        | zinc finger protein 106                          | 1.93   | 0.08 | 1.01   | 0.9347 | 1.07  | 0.7038 | 1.05   | 0.7559 | 1.27   | 0.2048 |
| 95536_at   | 1422591_at   | Tceb3         | transcription elongation factor B (SIII), polyp  | 1.25   | 0.16 | -1.09  | 0.4064 | -1.01 | 0.9169 | -1.46  | 0.0018 | 1.42   | 0.0142 |
| 95537_at   | 1417846_at   | Ulk2          | Unc-51 like kinase 2 (C. elegans)                | 1.2    | 0.32 | -1.2   | 0.0007 | -1.01 | 0.933  | -1.29  | 0.0016 | -1.53  | 0.069  |
| 95538_at   | 1452044_at   | Arpc5l        | actin related protein 2/3 complex, subunit 5-l   | 1.07   | 0.43 | -1.08  | 0.2183 | -1.07 | 0.3016 | -1.11  | 0.2377 | 1.15   | 0.1188 |
| 95539_at   | 1434306_at   | Rab3ip        | RAB3A interacting protein                        | 1.33   | 0.11 | 1.1    | 0.2955 | 1.07  | 0.3883 | 1.22   | 0.0359 | 1.25   | 0.0084 |
| 95541_at   | 1417953_at   | D6Wsu176e     | DNA segment, Chr 6, Wayne State Universi         | -1.29  | 0.13 | -1.1   | 0.3148 | -1.12 | 0.4233 | -1.07  | 0.4024 | -1.37  | 0.1434 |
| 95542_at   | 1433883_at   | Tpm4          | tropomyosin 4                                    | 1      | 1    | 1.06   | 0.7261 | 1.04  | 0.6311 | 1.05   | 0.7676 | 1.55   | 0.043  |
| 95544_at   | 1438017_at   | Rusc1         | RUN and SH3 domain containing 1                  | 1.41   | 0.23 | 1.15   | 0.1889 | 1.19  | 0.1107 | 1.36   | 0.0066 | 1.51   | 0.1792 |
| 95546_g_at | 1452014_a_at | Igf1          | insulin-like growth factor 1                     | -15.55 | 0    | -9.09  | 0      | -1.07 | 0.3507 | -17.36 | 0      | -14.75 | 0      |
| 95547_at   | 1419061_at   | Rhod          | ras homolog gene family, member D                | 1.11   | 0.56 | 1.05   | 0.5314 | -1.05 | 0.6335 | 1.04   | 0.5716 | 1.16   | 0.0625 |
| 95549_at   | 1418036_at   | Prim2         | DNA primase, p58 subunit                         | 1.06   | 0.84 | 2.62   | 0.0336 | 2.32  | 0.0268 | 2.62   | 0.0271 | 1.42   | 0.2712 |
| 95550_at   | 1427467_a_at | Rpgr          | retinitis pigmentosa GTPase regulator            | 1.23   | 0.62 | -1.06  | 0.9009 | -1.94 | 0.0977 | 1.34   | 0.4541 | -1.78  | 0.0757 |
| 95551_at   | 1452736_at   | 1700020M16Rik | RIKEN cDNA 1700020M16 gene                       | 1.24   | 0.49 | -1.11  | 0.3341 | -1.15 | 0.1558 | -1.07  | 0.5325 | 1.05   | 0.7019 |
| 95552_at   | 1417991_at   | Dio1          | deiodinase, iodothyronine, type I                | 1.65   | 0.33 | -11.22 | 0      | -6.26 | 0      | -11.55 | 0      | -10.51 | 0.0005 |
| 95555_at   | 1418123_at   | Unc119        | unc-119 homolog (C. elegans)                     | -1.22  | 0.37 | -1.03  | 0.7276 | 1.14  | 0.0407 | 1.07   | 0.3312 | 1.13   | 0.5367 |
| 95556_at   | 1423492_at   | Mrpl45        | mitochondrial ribosomal protein L45              | 4.52   | 0.05 | -1.04  | 0.7969 | -1.29 | 0.1913 | -1.24  | 0.2084 | 2.15   | 0.047  |
| 95557_at   | 1426238_at   | Bmp1          | bone morphogenetic protein 1                     | -1.34  | 0.19 | -1.25  | 0.055  | -1.09 | 0.3726 | -1.36  | 0.0045 | -1.34  | 0.1428 |
| 95559_at   | 1426766_at   | 6330403K07Rik | RIKEN cDNA 6330403K07 gene                       | 1.74   | 0.27 | 1.17   | 0.1772 | 1.09  | 0.524  | 1.03   | 0.6998 | 1.02   | 0.9277 |
| 95561_at   | 1429270_a_at | 1700013H19Rik | RIKEN cDNA 1700013H19 gene                       | 1.89   | 0.07 | 1.57   | 0.1301 | 1.44  | 0.2146 | 1.64   | 0.0235 | 1.04   | 0.9276 |
| 95562_at   | 1429483_at   | Ndp52         | nuclear domain 10 protein 52                     | 1.01   | 0.92 | 1.28   | 0.1724 | 1.04  | 0.7584 | 1.15   | 0.2016 | 1.44   | 0.2157 |
| 95563_at   | 1427188_at   | Arih1         | ariadne ubiquitin-conjugating enzyme E2 bir      | 1.54   | 0.3  | 1.01   | 0.9052 | -1.07 | 0.3283 | -1.1   | 0.2238 | -1.16  | 0.102  |
| 95565_at   | 1415720_s_at | Mad2l1bp      | MAD2L1 binding protein                           | -1.03  | 0.8  | 1.07   | 0.5552 | 1.13  | 0.3207 | -1.02  | 0.8808 | 1.13   | 0.2975 |
| 95566_at   | 1418050_at   | Gpld1         | glycosylphosphatidylinositol specific phosph     | 1.01   | 0.97 | 1.07   | 0.1905 | 1     | 0.9693 | 1.08   | 0.1355 | 1.38   | 0.0426 |
| 95567_at   | 1452884_at   | Sfrs2ip       | splicing factor, arginine/serine-rich 2, interac | 2.2    | 0.36 | 1.57   | 0.0804 | 1.71  | 0.0383 | 1.76   | 0.0387 | 1.04   | 0.8248 |
| 95568_at   | 1454074_a_at | 1500011J06Rik | RIKEN cDNA 1500011J06 gene                       | 1.19   | 0.43 | 1.39   | 0.0574 | 1.33  | 0.2082 | 1.38   | 0.0695 | 1.11   | 0.8223 |
| 95569_at   | 1460233_at   | Guca2b        | guanylate cyclase activator 2b (retina)          | 1.01   | 0.91 | 2.14   | 0.3412 | 1.74  | 0.2598 | 4.54   | 0.145  | 1.11   | 0.4747 |
| 95571_at   | 1418843_at   | Slc30a4       | solute carrier family 30 (zinc transporter), me  | 1.57   | 0.09 | 1.05   | 0.632  | 1.06  | 0.5438 | 1.06   | 0.5067 | 1.07   | 0.8155 |
| 95573_at   | 1438192_s_at | Baz2a         | bromodomain adjacent to zinc finger domain       | -1.08  | 0.69 | 1.11   | 0.1734 | 1.06  | 0.3656 | 1.24   | 0.0003 | 1.18   | 0.2512 |
| 95577_at   | 1452122_at   | Al314180      | expressed sequence Al314180                      | 1.46   | 0.14 | 1.18   | 0.036  | 1.2   | 0.0421 | 1.3    | 0.0005 | 1.04   | 0.7063 |
| 95580_at   | 1424385_at   | 5830417110Rik | RIKEN cDNA 5830417110 gene                       | 1.68   | 0.14 | 1.05   | 0.5964 | 1.18  | 0.0746 | 1.28   | 0.0121 | 1.41   | 0.2138 |
| 95584_at   | 1453223_s_at | Dppa2         | developmental pluripotency associated 2          | 5.41   | 0    | 1.04   | 0.8858 | -1.16 | 0.6631 | 1.11   | 0.7154 | 1.11   | 0.8243 |
| 95585_at   | 1418845_at   | Proc          | protein C                                        | 1.04   | 0.8  | 1.02   | 0.7298 | 1.01  | 0.7966 | -1.01  | 0.7499 | -1.08  | 0.6523 |
| 95587_at   | 1433628_at   | Gm1           | gene model 1, (NCBI)                             | -1.07  | 0.63 | -1.2   | 0.0141 | 1.02  | 0.81   | -1.09  | 0.2815 | 1      | 0.9693 |
| 95588_at   | 1417208_at   | Amacr         | alpha-methylacyl-CoA racemase                    | -1.95  | 0    | 1.35   | 0.0589 | 1.34  | 0.0423 | 1.65   | 0.0022 | -1.41  | 0.0832 |
| 95590_at   | 1424160_at   | Alg5          | asparagine-linked glycosylation 5 homolog (      | 1.55   | 0.13 | 1.07   | 0.2396 | 1.1   | 0.2622 | 1.13   | 0.2375 | 1.08   | 0.4957 |
| 95591_at   | 1434703_at   | Extl3         | exostosins (multiple)-like 3                     | 1.71   | 0.24 | 1.06   | 0.2531 | 1.01  | 0.9366 | -1.04  | 0.448  | 1.02   | 0.9521 |
| 95592_at   | 1428874_at   | 1110019N10Rik | RIKEN cDNA 1110019N10 gene                       | -1.07  | 0.68 | 1.03   | 0.6272 | 1.16  | 0.0775 | -1.05  | 0.5618 | 1.13   | 0.2376 |
| 95593_at   | 1415698_at   | Golph2        | golgi phosphoprotein 2                           | -1.07  | 0.73 | -1.06  | 0.4965 | 1.12  | 0.2935 | 1.04   | 0.7575 | 1.28   | 0.227  |
| 95594_at   | 1449697_s_at | Mfn1          | mitofusin 1                                      | 1.64   | 0.09 | 1.05   | 0.5194 | 1.19  | 0.0655 | 1.27   | 0.0003 | 1.14   | 0.3411 |
| 95596_at   | 1428353_at   | 1110054H05Rik | RIKEN cDNA 1110054H05 gene                       | 1.46   | 0.3  | 1.01   | 0.9591 | 1.27  | 0.0894 | -1.08  | 0.5929 | -1.25  | 0.5578 |
| 95597_at   | 1436448_a_at | Ptgs1         | prostaglandin-endoperoxide synthase 1            | 1.13   | 0.57 | 1.22   | 0.4633 | 1.13  | 0.4589 | 1.3    | 0.1847 | 1.28   | 0.1341 |
| 95600_at   | 1449119_at   | Arih2         | ariadne homolog 2 (Drosophila)                   | -1.4   | 0.52 | 1.18   | 0.0169 | 1.12  | 0.3699 | 1.16   | 0.0637 | -1.56  | 0.5359 |
| 95601_at   | 1419385_a_at | Ubqln1        | ubiquilin 1                                      | -1.08  | 0.46 | -1.05  | 0.6156 | -1.01 | 0.9246 | -1.26  | 0.0239 | -1.4   | 0.0982 |
| 95602_at   | 1460720_at   | Trpc4ap       | transient receptor potential cation channel, s   | -1.27  | 0.21 | -1.04  | 0.4378 | -1.11 | 0.0844 | -1.07  | 0.1606 | -1.02  | 0.6944 |
| 95603_at   | 1416049_at   | Gldc          | glycine decarboxylase                            | 1.11   | 0.77 | 1.27   | 0.005  | 1.07  | 0.4087 | 1.25   | 0.0063 | -1.27  | 0.2242 |
| 95604_at   | 1433618_at   | C330006A16Rik | RIKEN cDNA C330006A16 gene                       | -1.24  | 0.15 | -1.25  | 0.0021 | -1.26 | 0.0035 | -1.26  | 0.0179 | 1.07   | 0.6398 |
| 95606_at   | 1422768_at   | Syncrip       | synaptotagmin binding, cytoplasmic RNA int       | -1.45  | 0.21 | -1.12  | 0.7325 | 1.26  | 0.4001 | 1.33   | 0.2193 | -3     | 0.0032 |
| 95607_at   | 1417405_at   | Stard3        | START domain containing 3                        | -1.11  | 0.59 | -1.06  | 0.1553 | -1.02 | 0.6959 | -1.09  | 0.041  | 1.14   | 0.1126 |
| 95608_at   | 1417492_at   | Ctsb          | cathepsin B                                      | 1.89   | 0.02 | 1.35   | 0.0077 | 1.07  | 0.6483 | 1.41   | 0.0065 | 1.23   | 0.3259 |
| 95609_at   | 1426798_a_at | ---           | ---                                              | 1.36   | 0.37 | 1.04   | 0.8011 | 1.17  | 0.1977 | -1.04  | 0.7027 | 1.05   | 0.7874 |
| 95610_at   | 1428092_at   | Cdc5l         | cell division cycle 5-like (S. pombe)            | -2.94  | 0.21 | 1.11   | 0.2664 | -1.02 | 0.8764 | -1.03  | 0.8626 | 1.06   | 0.7787 |
| 95611_at   | 1415904_at   | Lpl           | lipoprotein lipase                               | 2.85   | 0.08 | 3.79   | 0.0014 | -1.5  | 0.0992 | 7.05   | 0      | 11.79  | 0.0002 |
| 95612_at   | 1452917_at   | Rfc5          | replication factor C (activator 1) 5             | 1.12   | 0.58 | 1.08   | 0.3453 | -1.04 | 0.6061 | 1.03   | 0.6169 | -1.35  | 0.0812 |

|            |              |               |                                                 |       |      |       |        |       |        |       |        |       |        |
|------------|--------------|---------------|-------------------------------------------------|-------|------|-------|--------|-------|--------|-------|--------|-------|--------|
| 95613_at   | 1448339_at   | D9Wsu20e      | DNA segment, Chr 9, Wayne State Universi        | -1.46 | 0.04 | 1.05  | 0.4497 | -1.02 | 0.7242 | -1.08 | 0.1686 | -1.57 | 0.0006 |
| 95614_at   | 1454636_at   | Cbx5          | chromobox homolog 5 (Drosophila HP1a)           | -1.15 | 0.76 | 1.24  | 0.0018 | -1.12 | 0.2048 | 1.2   | 0.0779 | 1.26  | 0.5871 |
| 95616_at   | 1452064_at   | Crs3          | cofactor required for Sp1 transcriptional acti  | 1.17  | 0.25 | 1.19  | 0.074  | 1.17  | 0.3079 | 1.2   | 0.0502 | 1.2   | 0.2207 |
| 95617_at   | 1425981_a_at | Rbl2          | retinoblastoma-like 2                           | 1.76  | 0.16 | 1.2   | 0.112  | 1.11  | 0.5441 | 1.28  | 0.0411 | 1.16  | 0.441  |
| 95619_at   | 1429122_a_at | 1700040I03Rik | RIKEN cDNA 1700040I03 gene                      | 1.44  | 0.03 | 1.08  | 0.4921 | 1.09  | 0.4393 | 1.05  | 0.7017 | -1.02 | 0.8553 |
| 95620_at   | 1426440_at   | Dhrs7         | dehydrogenase/reductase (SDR family) mer        | 2.13  | 0.02 | -1.16 | 0.004  | -1.24 | 0.0016 | -1.17 | 0.0594 | 1.13  | 0.1568 |
| 95621_at   | 1426284_at   | Krt20         | keratin 20                                      | 4.56  | 0.04 | 1.35  | 0.3148 | 1.62  | 0.3191 | 1.17  | 0.5857 | 1.49  | 0.1546 |
| 95622_at   | 1460678_at   | Klhdc2        | kelch domain containing 2                       | 1.47  | 0.01 | -1.05 | 0.2805 | 1.09  | 0.1777 | 1.14  | 0.0419 | 1.16  | 0.0605 |
| 95625_at   | 1417116_at   | Slc6a8        | solute carrier family 6 (neurotransmitter tran: | 3.94  | 0.05 | -1    | 0.9987 | 1.34  | 0.1158 | 1.47  | 0.1461 | 2.08  | 0.0044 |
| 95626_at   | 1422532_at   | ---           | ---                                             | 1.24  | 0.02 | 1.05  | 0.567  | 1.11  | 0.2779 | 1.1   | 0.2438 | -1.34 | 0.3447 |
| 95627_at   | 1437155_a_at | Wwtr1         | WW domain containing transcription regulat      | 2.04  | 0.25 | 1.03  | 0.798  | -1.15 | 0.324  | 1.09  | 0.5442 | -1.08 | 0.7379 |
| 95628_at   | 1422944_a_at | Diap3         | diaphanous homolog 3 (Drosophila)               | -1.32 | 0.71 | 1.02  | 0.9288 | 1.06  | 0.7689 | 1.51  | 0.0118 | -1.52 | 0.4979 |
| 95629_at   | 1436019_a_at | ---           | ---                                             | 1.21  | 0.05 | -1.21 | 0.0004 | -1.17 | 0.001  | -1.15 | 0.0127 | -1.55 | 0.0391 |
| 95630_at   | 1448522_at   | Sars2         | seryl-aminoacyl-tRNA synthetase 2               | -1.2  | 0.36 | -1.1  | 0.3637 | -1.03 | 0.7438 | -1.1  | 0.2061 | 1.2   | 0.0331 |
| 95631_at   | 1460288_a_at | Ppp4c         | protein phosphatase 4, catalytic subunit        | -1.11 | 0.77 | -1.09 | 0.276  | -1.16 | 0.1498 | -1.12 | 0.1737 | 1.22  | 0.095  |
| 95635_g_at | 1429252_at   | 0610010K14Rik | RIKEN cDNA 0610010K14 gene                      | 1.1   | 0.57 | -1.04 | 0.7562 | -1.18 | 0.1859 | -1.02 | 0.8772 | 3.93  | 0.0615 |
| 95636_at   | 1428679_s_at | 0610010K14Rik | RIKEN cDNA 0610010K14 gene                      | 1.29  | 0.26 | -1.11 | 0.2273 | -1.15 | 0.2341 | -1.02 | 0.7989 | -1.26 | 0.5061 |
| 95637_at   | 1426750_at   | Flnb          | filamin, beta                                   | 1.43  | 0.15 | 1.04  | 0.7171 | 1.14  | 0.2277 | 1.17  | 0.0544 | 1.53  | 0.1084 |
| 95639_at   | 1449532_at   | Chrng         | cholinergic receptor, nicotinic, gamma polyp    | -1.03 | 0.85 | 1.64  | 0.1763 | 1.29  | 0.3631 | 1.81  | 0.0866 | 1.61  | 0.2541 |
| 95641_at   | 1452590_a_at | MGC41689      | hypothetical LOC211623                          | 1.92  | 0.04 | -1.01 | 0.9766 | 1.09  | 0.7888 | -1.2  | 0.5918 | 1.8   | 0.3726 |
| 95643_at   | 1415770_at   | Wdr6          | WD repeat domain 6                              | 2.58  | 0.01 | 1.05  | 0.6934 | 1.67  | 0.0005 | 1.3   | 0.0587 | 2.05  | 0.0468 |
| 95646_at   | 1416772_at   | Cpt2          | carnitine palmitoyltransferase 2                | 1.17  | 0.41 | -1.05 | 0.4781 | -1.14 | 0.0765 | -1.22 | 0.001  | -1.6  | 0.0031 |
| 95648_at   | 1423782_at   | Mobk1b        | MOB1, Mps One Binder kinase activator-like      | -1.28 | 0.35 | 1.21  | 0.0027 | 1.08  | 0.1328 | 1.3   | 0.0036 | 1.13  | 0.1906 |
| 95649_at   | 1424170_at   | Phf5a         | PHD finger protein 5A                           | 1.22  | 0.12 | 1.04  | 0.5968 | 1.19  | 0.0603 | 1.1   | 0.2136 | -1.06 | 0.4227 |
| 95650_at   | 1416972_at   | Nhp21         | NHP2 non-histone chromosome protein 2-lik       | -1.29 | 0.27 | -1.08 | 0.2393 | -1.13 | 0.0231 | -1.15 | 0.0246 | 1.13  | 0.2104 |
| 95652_at   | 1455749_x_at | ---           | ---                                             | -1.12 | 0.61 | -1    | 0.9431 | -1.04 | 0.2392 | -1.06 | 0.2091 | 1.2   | 0.1045 |
| 95653_at   | 1423764_s_at | Mrpl37        | mitochondrial ribosomal protein L37             | 1.4   | 0.05 | -1.02 | 0.7522 | 1.09  | 0.19   | -1.03 | 0.6212 | 1.03  | 0.783  |
| 95655_at   | 1452203_at   | 5830411E10Rik | RIKEN cDNA 5830411E10 gene                      | 1.38  | 0.28 | 1.14  | 0.1958 | 1.13  | 0.4639 | 1.26  | 0.1064 | -1.11 | 0.7875 |
| 95658_at   | 1424121_at   | Comm1         | COMM domain containing 1                        | 1.8   | 0.07 | 1.05  | 0.6319 | 1.05  | 0.6169 | 1.01  | 0.8612 | -1.01 | 0.9546 |
| 95659_at   | 1416569_at   | Actl6a        | actin-like 6A                                   | -1.1  | 0.63 | 1.02  | 0.7744 | 1.05  | 0.5004 | 1.09  | 0.1629 | -1.33 | 0.0742 |
| 95660_at   | 1417203_at   | Eth1          | ethylmalonic encephalopathy 1                   | -1.11 | 0.68 | -1.1  | 0.4272 | -1.02 | 0.79   | -1.09 | 0.4111 | -1.07 | 0.8023 |
| 95661_at   | 1416066_at   | Cd9           | CD9 antigen                                     | -1.1  | 0.39 | -1.17 | 0.0693 | -1.05 | 0.6194 | -1.12 | 0.0836 | -1.27 | 0.2391 |
| 95662_at   | 1417241_at   | X83328        | EST X83328                                      | 1.45  | 0.19 | -1.05 | 0.4234 | 1.03  | 0.7315 | -1.04 | 0.5984 | 1.04  | 0.8428 |
| 95665_at   | 1453412_a_at | Sec14l1       | SEC14-like 1 (S. cerevisiae)                    | 1.19  | 0.76 | 1.08  | 0.6162 | 1.01  | 0.9722 | 1.06  | 0.4213 | 1.04  | 0.9387 |
| 95666_at   | 1415934_at   | Cops8         | COP9 (constitutive photomorphogenic) hom        | 1.25  | 0.16 | -1.01 | 0.9199 | 1.03  | 0.711  | -1.06 | 0.3681 | -1.02 | 0.7436 |
| 95670_at   | 1423280_at   | Stmn2         | stathmin-like 2                                 | -1.17 | 0.64 | 1.01  | 0.9656 | 1.07  | 0.6794 | -1.05 | 0.7923 | 1.71  | 0.3641 |
| 95671_at   | 1415999_at   | Hey1          | hairy/enhancer-of-split related with YRPW r     | -1.14 | 0.55 | -1.12 | 0.661  | -1.12 | 0.6867 | -1.32 | 0.2977 | 1.22  | 0.4229 |
| 95674_r_at | 1428572_at   | Basp1         | brain abundant, membrane attached signal p      | -1.52 | 0.01 | 1.02  | 0.7021 | -1.17 | 0.0303 | -1.11 | 0.107  | 1.15  | 0.1669 |
| 95675_at   | 1426759_at   | Map4k3        | mitogen-activated protein kinase kinase kin     | 1.25  | 0.15 | 1.15  | 0.0165 | 1.24  | 0.0283 | 1.17  | 0.0309 | 1.05  | 0.6611 |
| 95677_at   | 1452713_a_at | 0610009C03Rik | RIKEN cDNA 0610009C03 gene                      | 1.25  | 0.46 | 1.16  | 0.0932 | 1.06  | 0.3545 | 1.07  | 0.4082 | 1.26  | 0.3828 |
| 95679_at   | 1417161_at   | D19Ert144e    | DNA segment, Chr 19, ERATO Doi 144, exp         | 1.27  | 0.47 | 1.17  | 0.0085 | -1.02 | 0.775  | 1.08  | 0.2524 | 1.18  | 0.2958 |
| 95680_at   | 1417342_at   | ---           | ---                                             | 1.38  | 0.51 | -1.02 | 0.8837 | -1.1  | 0.3604 | -1.17 | 0.0882 | -1.32 | 0.2458 |
| 95681_f_at | 1417341_a_at | Ppp1r2        | protein phosphatase 1, regulatory (inhibitor)   | 1.35  | 0.34 | 1.07  | 0.8137 | 1.45  | 0.1757 | 1.58  | 0.0412 | 1.29  | 0.6951 |
| 95683_g_at | 1415735_at   | Ddb1          | damage specific DNA binding protein 1           | -1.01 | 0.97 | 1     | 0.9809 | 1.02  | 0.9015 | 1.11  | 0.1442 | -1.04 | 0.8309 |
| 95685_at   | 1416890_at   | 5730436H21Rik | RIKEN cDNA 5730436H21 gene                      | 2.64  | 0.28 | 1.25  | 0.14   | 1.25  | 0.0511 | 1.18  | 0.264  | 1.77  | 0.1156 |
| 95688_at   | 1423346_at   | Degs1         | degenerative spermatocyte homolog 1 (Dros       | 1.35  | 0.2  | 1.14  | 0.056  | 1.11  | 0.3206 | 1.14  | 0.0033 | 1.01  | 0.9423 |
| 95690_at   | 1428068_at   | 1110030L07Rik | RIKEN cDNA 1110030L07 gene                      | 1.27  | 0.11 | 1.02  | 0.5974 | 1.22  | 0.0143 | 1.25  | 0.0038 | -1.02 | 0.7939 |
| 95692_at   | 1433708_at   | Srp68         | signal recognition particle 68                  | 1.16  | 0.37 | -1.12 | 0.069  | -1.11 | 0.2546 | -1.1  | 0.1151 | -1.06 | 0.6223 |
| 95693_at   | 1450048_a_at | Ldh2          | isocitrate dehydrogenase 2 (NADP+), mitoch      | 1.97  | 0    | 1.61  | 0.0018 | 1.43  | 0.0065 | 1.69  | 0.0002 | 3.05  | 0      |
| 95694_at   | 1423474_at   | Top1          | topoisomerase (DNA) I                           | -1.22 | 0.26 | -1.05 | 0.6763 | 1.03  | 0.8319 | -1.12 | 0.3957 | -1.13 | 0.5762 |
| 95695_at   | 1423109_s_at | Slc25a20      | solute carrier family 25 (mitochondrial carniti | 1.11  | 0.47 | 1.05  | 0.6178 | 1.13  | 0.1258 | 1.11  | 0.1577 | -1.4  | 0.0169 |
| 95697_at   | 1451470_s_at | Eif5a         | eukaryotic translation initiation factor 5A     | -1    | 0.99 | -1.22 | 0.3234 | 1.14  | 0.315  | -1.16 | 0.3235 | -1.09 | 0.814  |
| 95698_at   | 1448331_at   | Ndufb7        | NADH dehydrogenase (ubiquinone) 1 beta s        | 1.08  | 0.33 | -1.04 | 0.3666 | -1    | 0.9715 | 1.03  | 0.5052 | -1.02 | 0.948  |

|            |              |                |                                                 |       |      |       |        |       |        |       |        |       |        |
|------------|--------------|----------------|-------------------------------------------------|-------|------|-------|--------|-------|--------|-------|--------|-------|--------|
| 95700_r_at | 1452683_at   | Dnajc8         | DnaJ (Hsp40) homolog, subfamily C, memb         | 1.03  | 0.87 | 1.54  | 0.0012 | 1.4   | 0.0151 | 1.73  | 0.0007 | -1.03 | 0.8896 |
| 95701_at   | 1448960_at   | Cxxc5          | CXXC finger 5                                   | 1.47  | 0.27 | 1.24  | 0.0027 | 1.07  | 0.5044 | 1.16  | 0.1364 | 1.15  | 0.3657 |
| 95702_at   | 1426342_at   | 1300006C19Rik  | RIKEN cDNA 1300006C19 gene                      | 1.08  | 0.65 | 1.18  | 0.076  | 1.11  | 0.3118 | 1.13  | 0.1104 | -1.21 | 0.3893 |
| 95703_at   | 1416443_a_at | Uble1a         | ubiquitin-like 1 (sentrin) activating enzyme E  | 1.94  | 0.01 | -1.03 | 0.5427 | -1.03 | 0.7374 | -1.08 | 0.083  | -1.17 | 0.1507 |
| 95704_at   | 1416279_at   | Ap1b1          | adaptor protein complex AP-1, beta 1 subun      | -1.11 | 0.24 | -1.09 | 0.2815 | -1.09 | 0.2473 | -1.07 | 0.2888 | 1.05  | 0.5299 |
| 95705_s_at | 1419734_at   | Actb           | actin, beta, cytoplasmic                        | -1.14 | 0.49 | 1.1   | 0.4477 | -1.33 | 0.0244 | -1.02 | 0.8649 | 1.15  | 0.7102 |
| 95706_at   | 1426808_at   | Lgals3         | lectin, galactose binding, soluble 3            | 2.57  | 0.1  | 2.96  | 0.2998 | -1.11 | 0.6411 | 4.42  | 0.2007 | -1.14 | 0.8003 |
| 95707_at   | 1448685_at   | 2900010M23Rik  | RIKEN cDNA 2900010M23 gene                      | 1.24  | 0.34 | -1.13 | 0.169  | -1.11 | 0.2119 | -1.16 | 0.0925 | -1    | 0.9571 |
| 95708_at   | 1415827_a_at | D3Ucla1        | DNA segment, Chr 3, University of Californi     | -1.75 | 0    | -1.18 | 0.0089 | -1.08 | 0.0517 | -1.08 | 0.0394 | -1.98 | 0      |
| 95709_at   | 1452770_at   | Vkorc1         | vitamin K epoxide reductase complex, subu       | -1.11 | 0.18 | -1.16 | 0.0074 | 1.11  | 0.0438 | -1.19 | 0.0102 | -1.01 | 0.9406 |
| 95712_at   | 1417037_at   | Orc6l          | origin recognition complex, subunit 6-like (S   | 1.95  | 0.08 | 1.15  | 0.3257 | 1.05  | 0.7836 | -1.05 | 0.7558 | 1.24  | 0.5439 |
| 95713_at   | 1416883_at   | Clptm1         | cleft lip and palate associated transmembran    | -1.34 | 0.12 | 1.04  | 0.5605 | 1.15  | 0.1488 | 1.12  | 0.1106 | -1.15 | 0.2533 |
| 95714_at   | 1436681_x_at | 0610009D07Rik  | RIKEN cDNA 0610009D07 gene                      | 1.01  | 0.91 | 1.04  | 0.5333 | -1.01 | 0.9629 | 1.03  | 0.5965 | -1.34 | 0.0209 |
| 95715_at   | 1452674_a_at | Eif3s12        | eukaryotic translation initiation factor 3, sub | 1.19  | 0.16 | -1.04 | 0.2888 | 1.13  | 0.0538 | 1.03  | 0.4918 | 1.16  | 0.0697 |
| 95716_at   | 1450012_x_at | Ywhag          | 3-monooxygenase/tryptophan 5-monooxyge          | 1.23  | 0.02 | -1.21 | 0.0836 | -1.32 | 0.0174 | -1.02 | 0.8564 | 1.1   | 0.5684 |
| 95717_at   | 1426643_at   | Elp3           | elongation protein 3 homolog (S. cerevisiae)    | 1.34  | 0.18 | -1.1  | 0.257  | -1.01 | 0.9197 | 1.05  | 0.4405 | -1.78 | 0.1142 |
| 95718_f_at | 1448179_at   | Usmg5          | upregulated during skeletal muscle growth 5     | 1.03  | 0.87 | -1.01 | 0.8339 | 1.14  | 0.1636 | 1.11  | 0.275  | -1.33 | 0.0745 |
| 95721_at   | 1426648_at   | Mapkapk2       | MAP kinase-activated protein kinase 2           | -1.09 | 0.64 | 1.29  | 0.0055 | -1.08 | 0.5537 | 1.21  | 0.1936 | 1.2   | 0.0841 |
| 95722_at   | 1416592_at   | Glrx1          | glutaredoxin 1 (thioltransferase)               | 1.07  | 0.61 | 1.01  | 0.8451 | 1.23  | 0.0068 | 1.32  | 0      | 1.02  | 0.8813 |
| 95723_r_at | 1428708_x_at | 2610009E16Rik  | RIKEN cDNA 2610009E16 gene                      | -1.63 | 0.09 | -1.12 | 0.0447 | -1.16 | 0.1102 | -1.25 | 0      | -1.08 | 0.3616 |
| 95725_at   | 1448539_a_at | Acy3           | aspartoacylase (aminoacylase) 3                 | 1.23  | 0.27 | -1.32 | 0.0003 | -1.28 | 0      | -1.34 | 0      | -2.16 | 0.0007 |
| 95726_at   | 1423916_s_at | Mlf2           | myeloid leukemia factor 2                       | 1.16  | 0.7  | 1.19  | 0.0166 | 1.05  | 0.6697 | 1.16  | 0.0131 | -1.53 | 0.1097 |
| 95728_g_at | 1417610_at   | Apoa5          | apolipoprotein A-V                              | -1.42 | 0.03 | -1.01 | 0.8423 | 1.12  | 0.0278 | -1.08 | 0.215  | 1.07  | 0.7348 |
| 95730_at   | 1421971_a_at | Mrps34         | mitochondrial ribosomal protein S34             | 1.9   | 0.02 | 1.08  | 0.2006 | 1.2   | 0.0441 | 1.3   | 0.0006 | -1.19 | 0.45   |
| 95731_at   | 1454699_at   | Sesn1          | sestrin 1                                       | 1.3   | 0.19 | 1     | 0.9686 | 1.05  | 0.6609 | -1.05 | 0.5282 | -1.43 | 0.1011 |
| 95732_at   | 1451185_at   | Sf3b5          | splicing factor 3b, subunit 5                   | 1.05  | 0.78 | 1.01  | 0.9305 | 1.03  | 0.6966 | 1.01  | 0.9083 | -1.13 | 0.0524 |
| 95733_at   | 1451782_a_at | Slc29a1        | solute carrier family 29 (nucleoside transpor   | -1.4  | 0.04 | -1.67 | 0      | -1.12 | 0.1949 | -1.82 | 0      | -1.52 | 0.0467 |
| 95734_at   | 1422464_at   | Mrpl3          | mitochondrial ribosomal protein L3              | -1.57 | 0.01 | -1.14 | 0.0899 | -1.09 | 0.2743 | -1.04 | 0.6179 | 1.27  | 0.0292 |
| 95736_at   | 1416510_at   | Mrpl4          | mitochondrial ribosomal protein L4              | 1.01  | 0.98 | -1.09 | 0.1952 | -1.1  | 0.3686 | -1.15 | 0.0621 | -1.59 | 0.0099 |
| 95737_at   | 1451172_at   | 1200015A19Rik  | RIKEN cDNA 1200015A19 gene                      | 1.72  | 0    | 1.04  | 0.4638 | 1.11  | 0.3688 | 1.14  | 0.0653 | -1.25 | 0.0211 |
| 95738_at   | 1415836_at   | Aldh18a1       | aldehyde dehydrogenase 18 family, membe         | -1.08 | 0.89 | -1.24 | 0.401  | -1.6  | 0.096  | -1.4  | 0.2319 | -1.06 | 0.8895 |
| 95740_at   | 1452732_at   | 2300003P22Rik  | RIKEN cDNA 2300003P22 gene                      | -1.74 | 0.34 | 1.59  | 0.0113 | 1.47  | 0.1033 | 1.05  | 0.7929 | 1.54  | 0.0197 |
| 95742_at   | 1437220_x_at | Psm13          | proteasome (prosome, macropain) 26S sub         | 1.54  | 0.17 | 1.02  | 0.7881 | 1.14  | 0.2712 | 1.14  | 0.0928 | -1.53 | 0.0631 |
| 95746_at   | 1422508_at   | Atp6v1a1       | ATPase, H+ transporting, V1 subunit A, isof     | 1.07  | 0.02 | 1.24  | 0.0012 | 1.14  | 0.275  | 1.24  | 0      | 1.01  | 0.8992 |
| 95749_at   | 1428112_at   | Armet          | arginine-rich, mutated in early stage tumors    | -1.29 | 0.42 | -1.34 | 0.0649 | -1.22 | 0.0322 | -1.22 | 0.0364 | -2.26 | 0.0004 |
| 95750_at   | 1426654_at   | Zc3hc1         | zinc finger, C3HC type 1                        | 2.43  | 0.1  | -1.09 | 0.7062 | 1     | 0.9949 | -1.12 | 0.627  | 1.59  | 0.2108 |
| 95752_at   | 1426480_at   | Sbds           | Shwachman-Bodian-Diamond syndrome ho            | -1.07 | 0.8  | 1.13  | 0.219  | 1.06  | 0.5643 | 1.11  | 0.189  | 1.12  | 0.599  |
| 95753_at   | 1423920_at   | Brrn1          | barren homolog (Drosophila)                     | -1.28 | 0.77 | 1.05  | 0.9177 | -1.42 | 0.4657 | -1.47 | 0.4288 | -1.01 | 0.9667 |
| 95754_at   | 1448240_at   | Mbtps1         | membrane-bound transcription factor protea      | -1.35 | 0.09 | -1.06 | 0.2049 | 1.09  | 0.0179 | -1.01 | 0.6316 | -1.07 | 0.2668 |
| 95755_at   | 1435800_a_at | Csda           | cold shock domain protein A                     | -1.02 | 0.89 | -1.01 | 0.8558 | 1.05  | 0.6497 | -1.1  | 0.28   | -1.01 | 0.9693 |
| 95756_at   | 1451026_at   | Ftsj3          | FtsJ homolog 3 (E. coli)                        | 1.82  | 0.07 | 1     | 0.9556 | 1.15  | 0.1628 | 1.15  | 0.0991 | 1.12  | 0.4805 |
| 95758_at   | 1415822_at   | Scd2           | stearoyl-Coenzyme A desaturase 2                | 10.43 | 0.08 | 3.85  | 0.0014 | -1.25 | 0.2302 | 2.51  | 0.0001 | 1.58  | 0.0521 |
| 95759_at   | 1424014_at   | 2900092E17Rik  | RIKEN cDNA 2900092E17 gene                      | 1.41  | 0.1  | 1.11  | 0.247  | -1.05 | 0.4181 | 1     | 0.9588 | -1    | 0.9814 |
| 95760_at   | 1423820_at   | Elof1          | elongation factor 1 homolog (ELF1, S. cerev     | 1.27  | 0.52 | 1.01  | 0.8794 | 1.09  | 0.2952 | 1.07  | 0.3916 | 1.19  | 0.3123 |
| 95770_s_at | 1450583_s_at | Fpr11          | formyl peptide receptor-like 1                  | -1.17 | 0.61 | -1.26 | 0.1236 | -1.13 | 0.4969 | -1.32 | 0.1397 | 1.76  | 0.0509 |
| 95772_r_at | 1419301_at   | Fzd4           | frizzled homolog 4 (Drosophila)                 | 2.88  | 0.14 | -1.51 | 0.3336 | -1.44 | 0.3373 | -1.33 | 0.4621 | 1.99  | 0.267  |
| 95775_f_at | 1420701_at   | Klk1           | kallikrein 1                                    | -1.26 | 0.18 | -1.07 | 0.6528 | -1.04 | 0.7463 | -1.13 | 0.2325 | -1.05 | 0.4164 |
| 95783_g_at | 1422345_s_at | Mageb1 /// Mag | melanoma antigen, family B, 1 /// melanoma      | 2.24  | 0.18 | -1.49 | 0.278  | -1.31 | 0.4467 | -1.07 | 0.8634 | 1.25  | 0.5618 |
| 95784_at   | 1418809_at   | Pira1          | paired-Ig-like receptor A1                      | -1.96 | 0.21 | 1.4   | 0.4848 | -1.18 | 0.5359 | 1.45  | 0.2962 | 2.29  | 0.0779 |
| 95786_at   | 1416139_at   | Reg2           | regenerating islet-derived 2                    | -3.1  | 0.37 | -1.04 | 0.8787 | -1.29 | 0.4032 | -1.19 | 0.5598 | 1.79  | 0.4933 |
| 95787_s_at | 1426219_at   | Scp2           | sterol carrier protein 2, liver                 | -1.22 | 0.65 | 1.03  | 0.6413 | -1.04 | 0.7561 | -1.05 | 0.4848 | -2.17 | 0.0094 |
| 95791_s_at | 1427816_at   | Sfrs2          | splicing factor, arginine/serine-rich 2 (SC-35  | 1.16  | 0.65 | 1.12  | 0.2075 | 1.18  | 0.0875 | 1.06  | 0.5359 | -1.01 | 0.973  |
| 95792_at   | 1450190_at   | Zfp106         | zinc finger protein 106                         | -1.66 | 0.59 | -1.5  | 0.2643 | -1.1  | 0.8125 | -2.3  | 0.0396 | 1.87  | 0.4671 |

|            |              |                |                                                  |       |      |       |        |       |        |       |        |       |        |
|------------|--------------|----------------|--------------------------------------------------|-------|------|-------|--------|-------|--------|-------|--------|-------|--------|
| 95793_at   | 1420771_at   | Sprr2d         | small proline-rich protein 2D                    | 1.15  | 0.74 | 1.16  | 0.5717 | -1.17 | 0.5874 | -1.15 | 0.6137 | 1.19  | 0.6384 |
| 95796_g_at | 1422418_s_at | Sup4h1 /// Sup | suppressor of Ty 4 homolog 1 (S. cerevisiae      | 1.4   | 0.34 | -1.01 | 0.9002 | 1.03  | 0.4601 | 1.07  | 0.2653 | 1.08  | 0.4742 |
| 95799_s_at | 1450331_s_at | V2r4           | vomeroneasal 2, receptor, 4                      | -2.37 | 0.43 | -1.01 | 0.904  | -1.08 | 0.4157 | -1.01 | 0.9086 | 1.17  | 0.6133 |
| 95800_s_at | 1422249_s_at | Zfa /// Zfx    | zinc finger protein, autosomal /// zinc finger p | -1.23 | 0.19 | 1.13  | 0.3348 | -1    | 0.9915 | 1.07  | 0.5379 | 1.63  | 0.2162 |
| 95801_s_at | 1427831_s_at | Zfp260         | zinc finger protein 260                          | -1.33 | 0.42 | 1.12  | 0.2921 | 1.08  | 0.647  | 1.18  | 0.2334 | -1    | 0.9926 |
| 95804_g_at | 1448534_at   | Ptpns1         | protein tyrosine phosphatase, non-receptor I     | 1.02  | 0.77 | 2.43  | 0.0461 | -1.02 | 0.9271 | 3.75  | 0.1319 | -1.04 | 0.8561 |
| 95806_f_at | 1450538_s_at | Cma2 /// Mcpt9 | chymase 2, mast cell /// mast cell protease 9    | -2.44 | 0.07 | -1.25 | 0.2608 | 1.17  | 0.1861 | -1.1  | 0.3549 | -1.2  | 0.4274 |
| 95852_at   | 1445367_at   | ---            | Transcribed locus                                | 1.04  | 0.9  | -1.28 | 0.4037 | -1.01 | 0.9776 | -1.23 | 0.499  | 1.01  | 0.9429 |
| 95853_at   | 1446828_at   | ---            | ---                                              | 1.63  | 0.1  | 1.05  | 0.8283 | 1.54  | 0.2506 | 1.46  | 0.3916 | 2.36  | 0.0645 |
| 95854_at   | 1447990_at   | C76332         | expressed sequence C76332                        | -1.75 | 0.39 | -1.41 | 0.0938 | -1.13 | 0.4986 | -1.09 | 0.6228 | 1.35  | 0.4937 |
| 95855_at   | 1448059_at   | Mipol1         | mirror-image polydactyly gene 1 homolog (h       | 1.01  | 0.98 | -1.16 | 0.4224 | -1.1  | 0.7548 | 1.24  | 0.193  | 1.83  | 0.0095 |
| 95856_at   | 1447983_at   | Zfml           | Zinc finger, matrin-like                         | -1.8  | 0.2  | -1.4  | 0.0873 | -1.02 | 0.9378 | -1.33 | 0.1009 | 1.24  | 0.5158 |
| 95857_at   | 1444866_at   | E230006M18Rik  | RIKEN cDNA E230006M18 gene                       | -1.3  | 0.28 | 1.23  | 0.1806 | 1.71  | 0.1416 | 1.14  | 0.4193 | 1.86  | 0.0983 |
| 95858_at   | 1445116_at   | Usp25          | Ubiquitin specific protease 25                   | -1.62 | 0.38 | -1.15 | 0.4173 | -2.12 | 0.0015 | -1.61 | 0.038  | -1.37 | 0.454  |
| 95861_at   | 1419929_at   | D15ErtD55e     | DNA segment, Chr 15, ERATO Doi 55, expr          | -1.1  | 0.62 | -1.26 | 0.0487 | -1.29 | 0.033  | -1.25 | 0.0526 | 1     | 0.9837 |
| 95862_at   | 1420253_at   | D2ErtD63e      | DNA segment, Chr 2, ERATO Doi 63, expre          | -1.77 | 0.18 | -1.01 | 0.955  | -1.03 | 0.8141 | -1.06 | 0.5501 | 1.38  | 0.0261 |
| 95863_at   | 1443428_at   | ---            | ---                                              | 1.47  | 0.57 | -2.2  | 0.0169 | -1.04 | 0.8739 | -1.83 | 0.0707 | -1.03 | 0.956  |
| 95864_at   | 1447182_at   | C77815         | expressed sequence C77815                        | -2.59 | 0.17 | -1.53 | 0.1641 | 1.03  | 0.9086 | -1.48 | 0.2105 | 1.07  | 0.8563 |
| 95869_at   | 1420072_s_at | ---            | ---                                              | 1.27  | 0.68 | 1.44  | 0.1281 | -1.1  | 0.7442 | -1.64 | 0.1571 | 1.23  | 0.6929 |
| 95870_at   | 1442974_at   | D6ErtD160e     | DNA segment, Chr 6, ERATO Doi 160, expr          | -1.07 | 0.93 | 1.42  | 0.2102 | 2.02  | 0.2162 | 1.41  | 0.184  | 2.63  | 0.0423 |
| 95871_at   | 1448086_at   | D1ErtD164e     | DNA segment, Chr 1, ERATO Doi 164, expr          | -1.41 | 0.47 | -1.15 | 0.6253 | -1.29 | 0.4699 | 1.01  | 0.9847 | 1.51  | 0.1878 |
| 95872_at   | 1449755_at   | D7ErtD183e     | DNA segment, Chr 7, ERATO Doi 183, expr          | 1.25  | 0.54 | 1.02  | 0.8921 | -1.07 | 0.5456 | 1.3   | 0.0373 | 1.27  | 0.6305 |
| 95875_at   | 1459220_at   | C78651         | expressed sequence C78651                        | -1.11 | 0.56 | -1.01 | 0.9212 | -1.07 | 0.4741 | -1.03 | 0.753  | 1.11  | 0.6286 |
| 95876_at   | 1441659_at   | Dpf3           | D4, zinc and double PHD fingers, family 3        | -2.11 | 0.01 | 1.56  | 0.0743 | 1.21  | 0.3029 | 1.35  | 0.0516 | -1.01 | 0.9416 |
| 95877_at   | 1420101_at   | 2610020H08Rik  | RIKEN cDNA 2610020H08 gene                       | -1.43 | 0.45 | -1.81 | 0.0673 | -1.22 | 0.5851 | -2.19 | 0.0219 | 1.79  | 0.397  |
| 95878_at   | 1459410_at   | LOC493582      | hypothetical LOC493582                           | -1.02 | 0.96 | 1.42  | 0.2545 | 1.35  | 0.3709 | 1.12  | 0.7555 | 1.73  | 0.3272 |
| 95880_s_at | 1443461_at   | C79130         | expressed sequence C79130                        | -2.02 | 0.17 | 1.14  | 0.5601 | 1.04  | 0.8195 | -1.06 | 0.7714 | 1.68  | 0.1901 |
| 95881_f_at | 1419235_s_at | Helb           | helicase (DNA) B                                 | 1.23  | 0.34 | 1.07  | 0.6105 | 1.2   | 0.1713 | 1.07  | 0.6283 | 1.12  | 0.3821 |
| 95882_at   | 1449647_at   | ---            | ---                                              | 2.59  | 0.15 | -1.61 | 0.2456 | -2.15 | 0.0725 | -1.13 | 0.7298 | 2.96  | 0.1749 |
| 95883_at   | 1452180_at   | Phf17          | PHD finger protein 17                            | 1.21  | 0.71 | 1.49  | 0.0172 | 1.38  | 0.0264 | 1.36  | 0.0265 | 1.59  | 0.0425 |
| 95884_at   | 1449640_at   | ---            | ---                                              | -1.29 | 0.74 | -1.06 | 0.6187 | 1.4   | 0.2768 | 1.53  | 0.2359 | -1.27 | 0.5469 |
| 95886_g_at | 1434633_at   | AW558298       | expressed sequence AW558298                      | -1.08 | 0.6  | 1.41  | 0.0395 | 1.44  | 0.1482 | 1.58  | 0.0083 | 1.11  | 0.3996 |
| 95887_at   | 1448068_at   | 8430426K15Rik  | RIKEN cDNA 8430426K15 gene                       | -1.2  | 0.7  | -1.11 | 0.7801 | -1.43 | 0.2229 | 1     | 0.9989 | 1.98  | 0.1628 |
| 95889_at   | 1434787_at   | Al854770       | expressed sequence Al854770                      | -1.14 | 0.51 | 1.04  | 0.6242 | 1.24  | 0.0073 | -1.06 | 0.3792 | 1.45  | 0.0023 |
| 95890_r_at | 1459916_at   | 5730488B01Rik  | RIKEN cDNA 5730488B01 gene                       | 1.51  | 0.21 | -1.13 | 0.6133 | 1.08  | 0.788  | 1.06  | 0.8343 | -1.27 | 0.5602 |
| 95891_at   | 1459923_at   | LOC328660      | similar to RIKEN cDNA 2410004M13 gene; ;         | -1.09 | 0.68 | -1.19 | 0.1482 | -1.04 | 0.7757 | -1.05 | 0.6689 | 1.39  | 0.1261 |
| 95892_at   | 1449609_at   | LOC433755      | LOC433755                                        | 2.35  | 0.23 | -2.41 | 0.001  | -1.7  | 0.0617 | -1.97 | 0.0093 | 1.47  | 0.4029 |
| 95893_at   | 1422775_at   | Blk            | B lymphoid kinase                                | -1.46 | 0.01 | -1.06 | 0.6897 | -1.02 | 0.8742 | -1.13 | 0.3753 | -1.11 | 0.6912 |
| 95894_at   | 1447935_at   | C730036B14Rik  | RIKEN cDNA C730036B14 gene                       | 1.36  | 0.54 | -1.1  | 0.8206 | -1.37 | 0.3057 | -1.21 | 0.5283 | 1.08  | 0.8462 |
| 95895_at   | 1448046_at   | 9530020D24Rik  | RIKEN cDNA 9530020D24 gene                       | -1.29 | 0.63 | -1.36 | 0.3162 | -1.6  | 0.0892 | -1.59 | 0.0856 | 1.3   | 0.3915 |
| 95896_at   | 1459885_s_at | Cox7c          | cytochrome c oxidase, subunit VIIc               | 1.29  | 0.38 | 1.17  | 0.1007 | 1.43  | 0.0184 | 1.46  | 0.0028 | 1.37  | 0.1353 |
| 95897_at   | 1434386_at   | Atp2c1         | ATPase, Ca++-sequestering                        | 1.45  | 0.01 | 1.03  | 0.6888 | 1.09  | 0.5171 | -1.03 | 0.7345 | -1.08 | 0.7035 |
| 95898_at   | 1449422_at   | Cdh4           | cadherin 4                                       | 1.23  | 0.15 | 1.15  | 0.1231 | 1.19  | 0.0517 | 1.09  | 0.3213 | 1.36  | 0.0775 |
| 95901_f_at | 1419857_at   | Apoa1          | Apolipoprotein A-I                               | -2.68 | 0.02 | -2.14 | 0      | -1.63 | 0.0012 | -2.47 | 0      | -2.23 | 0.0781 |
| 95902_at   | 1440964_s_at | Al465270       | expressed sequence Al465270                      | 1.89  | 0.16 | 1.15  | 0.5762 | 1.59  | 0.0786 | -1.3  | 0.1037 | 1.37  | 0.4384 |
| 95903_at   | 1447959_at   | Zfp398         | zinc finger protein 398                          | 1.05  | 0.92 | -1.11 | 0.5579 | -1.08 | 0.6811 | -1.02 | 0.8944 | 1.42  | 0.3699 |
| 95904_at   | 1455628_at   | 6430543G08Rik  | RIKEN cDNA 6430543G08 gene                       | -1.34 | 0.28 | -1.15 | 0.2561 | -1.1  | 0.3966 | -1.09 | 0.3958 | -1.07 | 0.7052 |
| 95905_at   | 1436112_at   | Al118078       | expressed sequence Al118078                      | -1.22 | 0.66 | 1.01  | 0.9637 | 1.45  | 0.0173 | 1.26  | 0.3843 | 2.67  | 0.0604 |
| 95906_at   | 1459927_at   | 4833445I07Rik  | RIKEN cDNA 4833445I07 gene                       | 1.16  | 0.87 | -1.17 | 0.4452 | -1.08 | 0.7583 | 1.25  | 0.2065 | -1.53 | 0.1853 |
| 95908_at   | 1420790_x_at | Klra16         | killer cell lectin-like receptor, subfamily A, m | 1.92  | 0.29 | -1.14 | 0.521  | -1.45 | 0.1911 | -1    | 0.9973 | -2.71 | 0.1982 |
| 95909_at   | 1419859_at   | BC057079       | CDNA sequence BC057079                           | 1.02  | 0.91 | 1.34  | 0.0084 | 1.2   | 0.017  | 1.24  | 0.0277 | 1.5   | 0.4337 |
| 95912_at   | 1448043_x_at | Rnf2           | ring finger protein 2                            | 1.61  | 0.04 | 1.08  | 0.7682 | 1.14  | 0.501  | 1.06  | 0.8197 | -1.06 | 0.925  |
| 95913_at   | 1457265_at   | B230333C21Rik  | RIKEN cDNA B230333C21 gene                       | 1.17  | 0.69 | -1.07 | 0.7514 | 1.07  | 0.7086 | -1.1  | 0.6109 | -2.17 | 0.1454 |

|            |              |               |                                                 |       |      |       |        |       |        |       |        |       |        |
|------------|--------------|---------------|-------------------------------------------------|-------|------|-------|--------|-------|--------|-------|--------|-------|--------|
| 95914_at   | 1456405_at   | 6720461J16Rik | RIKEN cDNA 6720461J16 gene                      | 1.83  | 0.26 | -1.16 | 0.3013 | 1.19  | 0.2592 | 1.02  | 0.8766 | 1.99  | 0.136  |
| 95917_at   | 1445535_at   | AA407107      | expressed sequence AA407107                     | -2.95 | 0.25 | 1.11  | 0.6815 | -1.3  | 0.1783 | 1.01  | 0.9517 | 1.71  | 0.0237 |
| 95919_at   | 1443482_at   | LOC240677 /// | I similar to protease /// similar to protease   | -1.18 | 0.47 | -1.31 | 0.1851 | 1.1   | 0.7396 | 1.2   | 0.6642 | -1.1  | 0.758  |
| 95920_at   | 1448048_at   | BC016495      | cDNA sequence BC016495                          | -1.44 | 0.55 | 1.1   | 0.5246 | 1.02  | 0.8715 | -1.16 | 0.4182 | 1.31  | 0.4746 |
| 95923_at   | 1440959_s_at | Mynn          | myoneurin                                       | -1.36 | 0.36 | -1.16 | 0.5533 | 1.32  | 0.3976 | -1.59 | 0.063  | 2.14  | 0.038  |
| 95925_at   | 1419795_at   | AA517631      | expressed sequence AA517631                     | -1.67 | 0.2  | 1.06  | 0.8835 | -1.3  | 0.3879 | -1.52 | 0.2116 | -1.04 | 0.8866 |
| 95926_at   | 1419778_at   | ---           | ---                                             | -1.82 | 0.6  | 1.22  | 0.4993 | -1.29 | 0.446  | -1.12 | 0.6733 | 1.22  | 0.5865 |
| 95927_f_at | 1439516_at   | 2610201A13Rik | RIKEN cDNA 2610201A13 gene                      | 1.51  | 0.39 | -1.17 | 0.3699 | 1.24  | 0.2649 | -1.15 | 0.2563 | 1.39  | 0.5916 |
| 95929_at   | 1419533_at   | Nh1h1         | nescient helix loop helix 1                     | -1.89 | 0.21 | -1.04 | 0.8937 | -1.03 | 0.926  | 1.15  | 0.6369 | 1.07  | 0.859  |
| 95930_at   | 1419796_at   | Popdc3        | Popeye domain containing 3                      | -1.08 | 0.92 | -1.21 | 0.481  | -1.24 | 0.4124 | 1.3   | 0.3865 | 1.4   | 0.4307 |
| 95931_at   | 1439116_at   | ---           | ---                                             | -1.16 | 0.49 | -1.3  | 0.3948 | 1.11  | 0.707  | -1.73 | 0.0742 | -1.02 | 0.9403 |
| 95932_at   | 1450306_at   | Zp1           | zona pellucida glycoprotein 1                   | -1.68 | 0.04 | -1.18 | 0.4261 | -1.02 | 0.9057 | 1.13  | 0.3217 | 1.36  | 0.2684 |
| 95933_f_at | 1448037_at   | Zcchc6        | Zinc finger, CCHC domain containing 6           | -1.01 | 0.98 | -1.32 | 0.0922 | 1.15  | 0.2506 | -1.04 | 0.7391 | -1.6  | 0.4281 |
| 95934_at   | 1445485_at   | D7Ert187e     | DNA segment, Chr 7, ERATO Doi 187, expr         | -2    | 0.28 | 1.99  | 0.2422 | 2.26  | 0.0457 | 2.14  | 0.1012 | 1.02  | 0.9673 |
| 95935_at   | 1421145_at   | Slc26a2       | solute carrier family 26 (sulfate transporter), | -1.76 | 0.13 | 1.15  | 0.1574 | 1.02  | 0.85   | 1.19  | 0.1686 | 2.45  | 0.215  |
| 95936_at   | 1448022_at   | ---           | ---                                             | 2.17  | 0.05 | 1.31  | 0.4031 | 1.45  | 0.3203 | 1.78  | 0.1842 | -1.03 | 0.9581 |
| 95937_at   | 1449639_at   | 0610040J01Rik | RIKEN cDNA 0610040J01 gene                      | -1.15 | 0.47 | -1.08 | 0.5532 | -1.24 | 0.1373 | -1.27 | 0.1187 | 1.26  | 0.3736 |
| 95938_at   | 1448056_at   | Huwe1         | HECT, UBA and WW domain containing 1            | -1.05 | 0.91 | -1.14 | 0.576  | -2.01 | 0.0335 | -1.63 | 0.0488 | 1.62  | 0.0907 |
| 95940_f_at | 1435375_at   | Trio          | triple functional domain (PTPRF interacting)    | 1.01  | 0.97 | 2.87  | 0.0222 | 1.48  | 0.1423 | 2.9   | 0.0562 | 1.7   | 0.2235 |
| 95941_at   | 1420060_s_at | AA675344      | expressed sequence AA675344                     | 1.16  | 0.54 | 1.13  | 0.6357 | 1.19  | 0.5116 | -1.15 | 0.6506 | 1.84  | 0.1457 |
| 95943_at   | 1448051_at   | ---           | ---                                             | -1.03 | 0.9  | 1.1   | 0.7293 | 1.06  | 0.8279 | -1.18 | 0.4545 | 1.27  | 0.2184 |
| 95944_at   | 1424398_at   | Dhx36         | DEAH (Asp-Glu-Ala-His) box polypeptide 36       | 1.05  | 0.96 | 1.07  | 0.6748 | -1.97 | 0.0016 | -1.57 | 0.0375 | 1.21  | 0.3939 |
| 95945_at   | 1442900_at   | Prdm5         | EST AI197291                                    | -1.63 | 0.44 | -1.55 | 0.1363 | -1.07 | 0.7711 | -1.25 | 0.412  | 2.16  | 0.2484 |
| 95946_at   | 1458173_at   | ---           | Transcribed locus, moderately similar to NP,    | 2.63  | 0.17 | -1.77 | 0.0359 | -1.51 | 0.1097 | -2.65 | 0.0005 | 1.58  | 0.4352 |
| 95947_at   | 1443431_at   | ---           | ---                                             | -1.41 | 0.11 | 1.75  | 0.0039 | 1.34  | 0.0041 | 1.41  | 0.0143 | 1.96  | 0.1275 |
| 95948_at   | 1457520_at   | Tcfcp2l3      | Transcription factor CP2-like 3                 | -1.42 | 0.17 | -1.08 | 0.5741 | -1.11 | 0.5232 | 1.05  | 0.738  | 1.8   | 0.0228 |
| 95949_at   | 1442492_at   | DXErt11e      | DNA segment, Chr X, ERATO Doi 11, expr          | 1.36  | 0.44 | 1.07  | 0.8302 | -1.05 | 0.8912 | 1.35  | 0.3227 | 1.49  | 0.193  |
| 95950_at   | 1443326_at   | ---           | ---                                             | -1.09 | 0.83 | 1.52  | 0.1408 | 2.4   | 0.0943 | 1.65  | 0.1578 | 2.46  | 0.0322 |
| 95951_at   | 1420804_s_at | Clec4d        | C-type lectin domain family 4, member d         | -1.69 | 0.52 | 1.3   | 0.6479 | 1.22  | 0.6845 | 2.59  | 0.366  | -1.03 | 0.9226 |
| 95952_at   | 1453355_at   | 1810073P09Rik | RIKEN cDNA 1810073P09 gene                      | 1.12  | 0.73 | -1.08 | 0.5152 | -1.19 | 0.3048 | -1.17 | 0.3387 | 1.12  | 0.7527 |
| 95953_at   | 1442531_at   | D12Ert123e    | DNA segment, Chr 12, ERATO Doi 123, exp         | -4.13 | 0.25 | 1.28  | 0.4992 | 1.07  | 0.813  | -1.16 | 0.605  | 1.73  | 0.0744 |
| 95954_at   | 1444292_at   | D7Ert143e     | DNA segment, Chr 7, ERATO Doi 143, expr         | -1.22 | 0.54 | -1.01 | 0.9761 | -1.09 | 0.7371 | -1.03 | 0.8904 | -1.98 | 0.2251 |
| 95955_at   | 1443949_at   | Ppp2r5e       | Protein phosphatase 2, regulatory subunit B     | 1.15  | 0.86 | -1.06 | 0.7809 | 1.11  | 0.7369 | 1.08  | 0.7769 | 3.05  | 0.0228 |
| 95956_at   | 1459926_at   | C77068        | expressed sequence C77068                       | -1.47 | 0.23 | 1.08  | 0.6041 | 1.28  | 0.107  | 1.03  | 0.8684 | -1.06 | 0.5366 |
| 95957_at   | 1458215_at   | Setdb1        | SET domain, bifurcated 1                        | -4.09 | 0    | 1.22  | 0.3937 | -1.01 | 0.9652 | -1.09 | 0.7369 | -1.01 | 0.9456 |
| 95959_at   | 1443427_at   | ---           | ---                                             | -5.34 | 0.05 | 1.23  | 0.5306 | 1.7   | 0.1635 | 1.3   | 0.55   | -1.02 | 0.9709 |
| 95960_at   | 1458011_s_at | D4Ert117e     | DNA segment, Chr 4, ERATO Doi 117, expr         | 1.74  | 0.33 | 1.14  | 0.7095 | 1.09  | 0.7717 | -1.25 | 0.4212 | 1.4   | 0.538  |
| 95961_at   | 1455694_at   | Nbeal2        | neurobeachin-like 2                             | -1.17 | 0.55 | 1.01  | 0.9862 | -1.46 | 0.1661 | 1.06  | 0.8572 | 1.16  | 0.4582 |
| 95962_at   | 1448076_at   | Sh2bp1        | SH2 domain binding protein 1 (tetratricopept    | 2.04  | 0.19 | -1.07 | 0.777  | -1.16 | 0.5617 | -1.65 | 0.1518 | 1.09  | 0.8829 |
| 95963_at   | 1419968_at   | C77370        | expressed sequence C77370                       | -1.44 | 0.31 | -1    | 0.9873 | 1.19  | 0.5422 | -1.07 | 0.8001 | 2.39  | 0.0685 |
| 95965_at   | 1419891_s_at | C77545        | expressed sequence C77545                       | -1.32 | 0.52 | -1.22 | 0.6669 | 1.04  | 0.9311 | -1.48 | 0.3852 | 1.45  | 0.5539 |
| 95966_at   | 1442540_at   | C77609        | expressed sequence C77609                       | -6.44 | 0.33 | 1.05  | 0.8392 | -1.01 | 0.9469 | 1.12  | 0.8095 | -1.57 | 0.208  |
| 95967_at   | 1442526_at   | C77681        | expressed sequence C77681                       | -1.37 | 0.51 | -1.67 | 0.126  | -1.1  | 0.7487 | -1.26 | 0.4553 | 1.2   | 0.6058 |
| 95968_at   | 1443472_at   | C77691        | expressed sequence C77691                       | -3.31 | 0.23 | 1.33  | 0.5113 | 1.58  | 0.1747 | 1.14  | 0.696  | 1.22  | 0.5728 |
| 95970_at   | 1442665_at   | C77874        | expressed sequence C77874                       | -1.67 | 0.38 | -1.18 | 0.635  | -1.35 | 0.4306 | 1.01  | 0.9863 | 1.48  | 0.4449 |
| 95971_at   | 1459925_at   | C78282        | expressed sequence C78282                       | -1.2  | 0.73 | 1.12  | 0.6623 | -1.28 | 0.1977 | -1.03 | 0.8801 | 1.84  | 0.4644 |
| 95972_at   | 1459891_at   | C78444        | expressed sequence C78444                       | -1.16 | 0.76 | -1.2  | 0.6825 | -1.55 | 0.2445 | -1.98 | 0.0935 | -1.11 | 0.691  |
| 95973_at   | 1442566_at   | C78878        | expressed sequence C78878                       | -2.72 | 0.22 | -1.54 | 0.1661 | -1.47 | 0.2038 | 1.4   | 0.3555 | 4.25  | 0.2035 |
| 95974_at   | 1420549_at   | Gbp1          | guanylate nucleotide binding protein 1          | -1.31 | 0.66 | 3.37  | 0.335  | -4.86 | 0.179  | 3.21  | 0.3827 | 3.69  | 0.3183 |
| 95975_at   | 1443385_at   | A930012N16Rik | RIKEN cDNA A930012N16 gene                      | 1.24  | 0.57 | -1.29 | 0.2612 | 1.02  | 0.9144 | -1.5  | 0.0232 | 1.13  | 0.7363 |
| 95976_at   | 1420690_at   | Fgf10         | fibroblast growth factor 10                     | -1.09 | 0.64 | 1.12  | 0.1831 | 1.2   | 0.018  | 1.09  | 0.2346 | 1.35  | 0.2127 |
| 95977_at   | 1419774_at   | D2Ert239e     | DNA segment, Chr 2, ERATO Doi 239, expr         | 1.29  | 0.69 | 1.28  | 0.3813 | 1.25  | 0.5065 | 1.28  | 0.6129 | 1.4   | 0.4475 |
| 95978_at   | 1442145_at   | Gm542         | gene model 542, (NCBI)                          | 1.2   | 0.54 | -1.29 | 0.0088 | 1.21  | 0.0122 | -1.21 | 0.0081 | -2.08 | 0.0119 |

|            |              |               |                                              |       |      |       |        |       |        |       |        |       |        |
|------------|--------------|---------------|----------------------------------------------|-------|------|-------|--------|-------|--------|-------|--------|-------|--------|
| 95979_at   | 1457860_at   | ---           | ---                                          | -2.29 | 0.35 | 1.1   | 0.6494 | 1.25  | 0.3017 | 1.1   | 0.7195 | 2.06  | 0.1627 |
| 95981_at   | 1441401_at   | C79329        | expressed sequence C79329                    | 1.12  | 0.56 | -1.02 | 0.9096 | 1.06  | 0.6013 | -1    | 0.9965 | -1.42 | 0.4843 |
| 95982_at   | 1449638_at   | ---           | ---                                          | 1.19  | 0.55 | 1.16  | 0.2644 | 1.16  | 0.2624 | 1.34  | 0.0857 | 2.22  | 0.0279 |
| 95983_at   | 1458846_at   | ---           | ---                                          | -1.49 | 0.47 | 1.18  | 0.5625 | 1.25  | 0.5359 | 1.02  | 0.9466 | 1.12  | 0.8319 |
| 95984_at   | 1459900_at   | C79468        | expressed sequence C79468                    | 1.1   | 0.66 | 1.02  | 0.782  | 1.21  | 0.1337 | 1.06  | 0.6137 | -1.64 | 0.3055 |
| 95985_at   | 1441182_at   | Brwd3         | bromodomain and WD repeat domain contai      | -1.22 | 0.17 | 1.1   | 0.3135 | 1.09  | 0.4685 | -1.07 | 0.5851 | 1.38  | 0.1917 |
| 95986_at   | 1457887_at   | Scospondin    | Subcommissural organ spondin                 | -1.67 | 0.01 | -1.14 | 0.8089 | -1.08 | 0.2476 | -1.03 | 0.6212 | 1.33  | 0.0484 |
| 95987_at   | 1442694_at   | ---           | ---                                          | -1.11 | 0.87 | -1.32 | 0.1814 | 1.15  | 0.4836 | -1.09 | 0.7127 | -1.96 | 0.1575 |
| 95988_r_at | 1447968_at   | ---           | Transcribed locus                            | -1.19 | 0.35 | -1.28 | 0.43   | -1.54 | 0.3133 | -1.49 | 0.3315 | 1.28  | 0.6127 |
| 95990_at   | 1419780_at   | ---           | ---                                          | 1.77  | 0    | -1.19 | 0.0167 | -1.11 | 0.2606 | -1.13 | 0.2202 | 1.1   | 0.7543 |
| 95991_at   | 1419776_at   | ---           | ---                                          | 1.72  | 0.39 | -1.13 | 0.7138 | -1.47 | 0.3007 | -1.54 | 0.2335 | 1.17  | 0.8258 |
| 95992_at   | 1443416_at   | C79741        | expressed sequence C79741                    | -2.14 | 0.02 | 1.19  | 0.2723 | 1.26  | 0.1147 | 1.01  | 0.9531 | 1.2   | 0.5434 |
| 95994_at   | 1447965_at   | C80012        | expressed sequence C80012                    | -1.12 | 0.47 | -1.09 | 0.0553 | 1     | 0.9458 | -1.17 | 0.0013 | -1.06 | 0.5246 |
| 95996_at   | 1456972_at   | C80256        | expressed sequence C80256                    | -1.33 | 0.55 | -1.2  | 0.4206 | 1.32  | 0.23   | -1.21 | 0.5026 | 3.08  | 0.0078 |
| 95997_at   | 1442669_at   | ---           | 13 days embryo heart cDNA, RIKEN full-len    | 1.06  | 0.94 | 1.09  | 0.6553 | 1.26  | 0.3204 | 1.22  | 0.4106 | 1.51  | 0.0449 |
| 95998_at   | 1457872_at   | ---           | ---                                          | 1.01  | 0.99 | -1.81 | 0.0193 | -1.23 | 0.3138 | -1.41 | 0.1293 | 1.25  | 0.5126 |
| 95999_at   | 1440591_at   | ---           | ---                                          | -1.22 | 0.69 | 1.18  | 0.3419 | 1.22  | 0.2288 | 1.11  | 0.5124 | -2.72 | 0.3685 |
| 96000_at   | 1459924_at   | Atp6v0a1      | ATPase, H+ transporting, lysosomal V0 sub    | -1.38 | 0.32 | -1.73 | 0.1177 | -1    | 0.9872 | -1.46 | 0.2959 | -1.66 | 0.2497 |
| 96002_at   | 1428165_at   | Vps24         | vacuolar protein sorting 24 (yeast)          | -1.08 | 0.72 | -1.17 | 0.0097 | -1.05 | 0.4941 | -1.2  | 0.0035 | -1.25 | 0.3207 |
| 96004_at   | 1450878_at   | Sri           | sorcin                                       | -1.08 | 0.55 | -1.27 | 0.0017 | -1.08 | 0.1799 | -1.24 | 0.0001 | -1.39 | 0.2525 |
| 96007_at   | 1415700_a_at | Ssr3          | signal sequence receptor, gamma              | -1.34 | 0.03 | 1.08  | 0.0534 | 1.12  | 0.1049 | 1.09  | 0.1109 | -1.44 | 0.0004 |
| 96008_at   | 1418528_a_at | Dad1          | defender against cell death 1                | -1.12 | 0.38 | -1.13 | 0.1336 | 1.22  | 0.0251 | -1.05 | 0.6351 | -1.34 | 0.0043 |
| 96009_s_at | 1448290_at   | Pap           | pancreatitis-associated protein              | 1.02  | 0.93 | -1.21 | 0.066  | 1.13  | 0.5685 | -1.19 | 0.1638 | 1.3   | 0.2726 |
| 96010_at   | 1450386_at   | Kpna3         | karyopherin (importin) alpha 3               | -1.07 | 0.39 | 1.04  | 0.4008 | 1.12  | 0.2779 | 1.18  | 0.0912 | 1.07  | 0.1497 |
| 96012_f_at | 1438368_a_at | Matr3         | matrin 3                                     | 1.08  | 0.72 | 1.13  | 0.0939 | 1.07  | 0.4266 | 1.07  | 0.1495 | 1.37  | 0.0509 |
| 96013_r_at | 1434888_a_at | Matr3         | matrin 3                                     | 1.29  | 0.41 | 1.17  | 0.3085 | 1.07  | 0.668  | 1.16  | 0.1263 | 1.75  | 0.0181 |
| 96014_at   | 1452686_s_at | D4ErtD196e    | DNA segment, Chr 4, ERATO Doi 196, expr      | 1.66  | 0.01 | 1.17  | 0.0812 | -1.02 | 0.7864 | 1.13  | 0.1933 | 1.33  | 0.1878 |
| 96016_at   | 1436349_at   | 2700094K13Rik | RIKEN cDNA 2700094K13 gene                   | -1.01 | 0.97 | -1.19 | 0.1224 | -1.17 | 0.1421 | -1.06 | 0.5483 | -1.16 | 0.4147 |
| 96017_at   | 1416628_at   | 0610006I08Rik | RIKEN cDNA 0610006I08 gene                   | 1.08  | 0.42 | -1.16 | 0.0741 | -1.12 | 0.2604 | -1.1  | 0.2984 | -1.23 | 0.0147 |
| 96019_at   | 1422881_s_at | Sypl          | synaptophysin-like protein                   | -1.25 | 0.31 | 1.13  | 0.0976 | 1.23  | 0.0643 | 1.06  | 0.3761 | -1.02 | 0.8359 |
| 96020_at   | 1417063_at   | C1qb          | complement component 1, q subcomponent       | 1.24  | 0.4  | 1.05  | 0.8183 | -1.16 | 0.0715 | 1.27  | 0.5287 | 1.04  | 0.7514 |
| 96021_at   | 1424154_a_at | Hbld1         | HESB like domain containing 1                | 1.83  | 0.01 | -1.04 | 0.572  | 1.06  | 0.3781 | 1.08  | 0.305  | 1.05  | 0.6695 |
| 96023_at   | 1416231_at   | Vac14         | Vac14 homolog (S. cerevisiae)                | 1.6   | 0.09 | 1.02  | 0.8816 | -1.11 | 0.3085 | 1.25  | 0.0155 | 1.01  | 0.9797 |
| 96025_g_at | 1417125_at   | Ahcy          | S-adenosylhomocysteine hydrolase             | -1.1  | 0.38 | 1.07  | 0.0207 | 1     | 0.8657 | 1.06  | 0.0575 | 1.46  | 0.0027 |
| 96027_at   | 1449333_at   | Sf3a1         | splicing factor 3a, subunit 1                | 1.39  | 0.17 | -1.04 | 0.6324 | -1.01 | 0.8484 | -1.04 | 0.5412 | 1.01  | 0.9254 |
| 96029_at   | 1423811_at   | Sf3a3         | splicing factor 3a, subunit 3                | 1.62  | 0.02 | 1.07  | 0.404  | 1.08  | 0.2296 | 1.08  | 0.1658 | 1.07  | 0.5095 |
| 96030_at   | 1420627_a_at | Csna          | casein alpha                                 | -1.67 | 0.43 | 1.29  | 0.3424 | 1.22  | 0.3483 | 1.19  | 0.381  | 3.26  | 0.3129 |
| 96033_at   | 1415944_at   | Sdc1          | syndecan 1                                   | -1.28 | 0.28 | -1.14 | 0.1232 | -1.28 | 0.0071 | -1.48 | 0      | -1.12 | 0.4117 |
| 96035_at   | 1416647_at   | Bckdha        | branched chain ketoacid dehydrogenase E1     | 1.32  | 0.38 | 1.14  | 0.0835 | 1.1   | 0.3794 | 1.24  | 0.0159 | -1.12 | 0.6415 |
| 96037_at   | 1416924_at   | Bri3          | brain protein I3                             | 1.21  | 0.65 | 1.06  | 0.5104 | 1.32  | 0.0065 | 1.04  | 0.6567 | 1.08  | 0.5972 |
| 96038_at   | 1422603_at   | Rnase4        | ribonuclease, RNase A family 4               | 1.48  | 0.03 | 1.28  | 0.0149 | -1.02 | 0.7524 | 1.21  | 0.0146 | 1.76  | 0.0067 |
| 96041_at   | 1422660_at   | Rbm3          | RNA binding motif protein 3                  | 1.37  | 0.14 | 2.26  | 0.0054 | 1.91  | 0.0011 | 3.53  | 0      | 2.19  | 0.0018 |
| 96042_at   | 1448610_a_at | Sod2          | superoxide dismutase 2, mitochondrial        | 1.38  | 0    | 1.22  | 0.0273 | 1.15  | 0.0952 | 1.34  | 0.0005 | -1.36 | 0.116  |
| 96044_at   | 1416434_at   | Bcl2l10       | Bcl2-like 10                                 | -1.86 | 0.02 | -1.02 | 0.8944 | -1.12 | 0.1034 | -1.12 | 0.0589 | 1.24  | 0.2077 |
| 96046_at   | 1448246_at   | Hdac1         | histone deacetylase 1                        | 1.37  | 0.57 | -1.01 | 0.7448 | -1.06 | 0.4501 | -1.07 | 0.1608 | -1.08 | 0.6425 |
| 96047_at   | 1426225_at   | Rbp4          | retinol binding protein 4, plasma            | -1.04 | 0.77 | 1.05  | 0.2107 | 1.04  | 0.0241 | 1.08  | 0.0275 | 1.58  | 0.007  |
| 96048_at   | 1428326_s_at | Hrsp12        | heat-responsive protein 12                   | -1.08 | 0.7  | -1.05 | 0.491  | -1.1  | 0.3155 | -1.14 | 0.0538 | -1.53 | 0.0033 |
| 96049_at   | 1448323_a_at | Bgn           | biglycan                                     | -1.05 | 0.76 | -1.1  | 0.3935 | 1.04  | 0.6838 | -1.13 | 0.1527 | 1.18  | 0.1623 |
| 96050_at   | 1435856_x_at | Smarcb1       | SWI/SNF related, matrix associated, actin di | 1.31  | 0.12 | 1.1   | 0.2179 | 1.04  | 0.5185 | 1.19  | 0.0218 | 1.04  | 0.3022 |
| 96052_at   | 1450721_at   | Acp1          | acid phosphatase 1, soluble                  | 1.28  | 0.23 | -1.14 | 0.0156 | 1.03  | 0.6746 | -1.15 | 0.0417 | 1.04  | 0.4616 |
| 96054_f_at | 1422715_s_at | Acp1          | acid phosphatase 1, soluble                  | 1.19  | 0.72 | -1.05 | 0.3329 | 1.04  | 0.6546 | -1.12 | 0.0972 | -1.22 | 0.406  |
| 96055_at   | 1419473_a_at | Cck           | cholecystokinin                              | -2.23 | 0.25 | 1.07  | 0.649  | -1.2  | 0.196  | -1.33 | 0.0672 | 1.03  | 0.9457 |
| 96056_at   | 1448605_at   | Rhoc          | ras homolog gene family, member C            | -1.08 | 0.77 | 1.09  | 0.6107 | 1.08  | 0.5082 | 1.14  | 0.3582 | 1.41  | 0.1545 |

|            |              |               |                                                 |       |      |       |        |       |        |       |        |       |        |
|------------|--------------|---------------|-------------------------------------------------|-------|------|-------|--------|-------|--------|-------|--------|-------|--------|
| 96058_s_at | 1448143_at   | Aldh2         | aldehyde dehydrogenase 2, mitochondrial         | 1.14  | 0.44 | -1.01 | 0.7675 | -1.03 | 0.5924 | -1.08 | 0.1807 | -1.21 | 0.0969 |
| 96059_at   | 1428302_at   | Mrpl48        | mitochondrial ribosomal protein L48             | 1.96  | 0.02 | 1.11  | 0.1428 | 1.14  | 0.1341 | 1.18  | 0.0129 | -1.05 | 0.647  |
| 96060_at   | 1450138_a_at | Serpinb6a     | serine (or cysteine) proteinase inhibitor, clac | 1.34  | 0.16 | -1.14 | 0.2883 | -1.08 | 0.5631 | 1.03  | 0.8413 | -1.23 | 0.326  |
| 96063_at   | 1451968_at   | Xrcc5         | X-ray repair complementing defective repair     | 2.53  | 0.22 | -1.14 | 0.3084 | -1.06 | 0.7131 | -1.03 | 0.8282 | -1.12 | 0.7274 |
| 96064_at   | 1448872_at   | Reg3g         | regenerating islet-derived 3 gamma              | -1.64 | 0.14 | 1.01  | 0.929  | 1.08  | 0.6316 | -1.13 | 0.0444 | 1.63  | 0.0723 |
| 96065_at   | 1416503_at   | Lxn           | latexin                                         | 2.96  | 0.03 | 1.23  | 0.5601 | 1.34  | 0.2896 | 1.9   | 0.0199 | -1.33 | 0.3494 |
| 96066_s_at | 1417308_at   | Pkm2          | pyruvate kinase, muscle                         | 1.18  | 0.64 | 1.85  | 0.2017 | -1.08 | 0.7268 | 2.58  | 0.1622 | 1.6   | 0.1094 |
| 96068_at   | 1451217_a_at | 1500034J20Rik | RIKEN cDNA 1500034J20 gene                      | 1.63  | 0.03 | -1.08 | 0.5423 | 1.03  | 0.8511 | -1    | 0.9805 | 1.15  | 0.5422 |
| 96069_at   | 1417294_at   | Akr7a5        | aldo-keto reductase family 7, member A5 (a      | 1.28  | 0.28 | 1.01  | 0.8546 | 1.04  | 0.7323 | -1.06 | 0.4805 | 1.23  | 0.2299 |
| 96070_at   | 1449018_at   | Pfn1          | profilin 1                                      | -1.35 | 0.64 | -1.13 | 0.4278 | -1.16 | 0.4523 | 1.01  | 0.9519 | 1.43  | 0.3507 |
| 96072_at   | 1419737_a_at | Ldh1          | lactate dehydrogenase 1, A chain                | -1.02 | 0.84 | 1.23  | 0.0236 | 1.3   | 0.006  | 1.23  | 0.0327 | -1.42 | 0.0174 |
| 96073_at   | 1416534_at   | Dpf2          | D4, zinc and double PHD fingers family 2        | -1.16 | 0.16 | 1.02  | 0.6672 | 1.03  | 0.6334 | -1.03 | 0.5982 | -1.07 | 0.2048 |
| 96074_at   | 1418239_at   | Apop          | apolipoprotein F                                | -1.05 | 0.61 | -1.35 | 0.0185 | -1.1  | 0.1398 | -1.38 | 0.0001 | -3.03 | 0.0005 |
| 96075_at   | 1450851_at   | Wdr1          | WD repeat domain 1                              | -1.13 | 0.77 | 1.1   | 0.4261 | 1.01  | 0.855  | 1.09  | 0.3412 | -1.52 | 0.0045 |
| 96076_at   | 1449679_s_at | Stx5a         | syntaxin 5A                                     | 1.1   | 0.48 | 1.04  | 0.1914 | 1.16  | 0.0129 | 1.13  | 0.0924 | -1.25 | 0.2536 |
| 96078_g_at | 1417280_at   | Slc17a1       | solute carrier family 17 (sodium phosphate),    | -1.17 | 0.44 | 1.03  | 0.7688 | 1.25  | 0.0245 | -1.53 | 0.0002 | -1.21 | 0.3165 |
| 96079_at   | 1433463_at   | 0610010K06Rik | RIKEN cDNA 0610010K06 gene                      | 1.41  | 0.14 | 1.09  | 0.1298 | 1.23  | 0.0075 | 1.2   | 0.017  | -1.06 | 0.7967 |
| 96081_at   | 1416258_at   | Tk1           | thymidine kinase 1                              | 1.54  | 0.12 | -1.35 | 0.0002 | -1.11 | 0.311  | -1.15 | 0.0397 | -1.03 | 0.9346 |
| 96082_at   | 1423857_at   | Mrpl30        | mitochondrial ribosomal protein L30             | -1.24 | 0.64 | -1.13 | 0.1258 | -1.09 | 0.3936 | -1.24 | 0.0081 | 1.08  | 0.4172 |
| 96083_s_at | 1428225_s_at | Hnrpdl        | heterogeneous nuclear ribonucleoprotein D-      | -1.21 | 0.4  | 1.34  | 0.001  | 1.23  | 0.0069 | 1.32  | 0      | 1.41  | 0.0447 |
| 96084_at   | 1428224_at   | Hnrpdl        | heterogeneous nuclear ribonucleoprotein D-      | 1.23  | 0.08 | -1.03 | 0.6865 | 1.01  | 0.965  | 1.02  | 0.795  | 1.2   | 0.1685 |
| 96085_at   | 1416368_at   | Gsta4         | glutathione S-transferase, alpha 4              | 4.48  | 0.05 | 2.11  | 0.0001 | 1.32  | 0.0791 | 2.34  | 0      | 1.74  | 0.0019 |
| 96086_at   | 1423745_at   | 1110031B06Rik | RIKEN cDNA 1110031B06 gene                      | -1.07 | 0.69 | -1.04 | 0.5363 | -1.25 | 0.0044 | 1.03  | 0.4919 | -1.23 | 0.2239 |
| 96087_at   | 1423609_a_at | Mgat1         | mannoside acetylglucosaminyltransferase 1       | -1.04 | 0.7  | -1.18 | 0.003  | -1.15 | 0.0867 | -1.2  | 0.0007 | -1.11 | 0.5395 |
| 96088_at   | 1448154_at   | Ndrp2         | N-myc downstrom regulated gene 2                | -1    | 0.99 | -1.07 | 0.1632 | 1.04  | 0.3809 | -1.19 | 0.0024 | -1.69 | 0      |
| 96090_g_at | 1416607_at   | 4931406C07Rik | RIKEN cDNA 4931406C07 gene                      | 1.22  | 0.06 | -1.01 | 0.7968 | -1.09 | 0.172  | -1.02 | 0.8297 | -1.56 | 0.0023 |
| 96092_at   | 1448881_at   | Hp            | haptoglobin                                     | 1.09  | 0.24 | 1.25  | 0.0029 | 1.05  | 0.4499 | 1.26  | 0.002  | 1.12  | 0.3145 |
| 96093_at   | 1454161_s_at | 0610007P14Rik | RIKEN cDNA 0610007P14 gene                      | -1.16 | 0.16 | -1.16 | 0.0606 | 1.05  | 0.5211 | -1.09 | 0.3041 | -1.2  | 0.0374 |
| 96094_at   | 1455201_x_at | Apoa1         | apolipoprotein A-I                              | -1.38 | 0.19 | 1.02  | 0.5071 | 1.04  | 0.162  | 1.01  | 0.841  | 1.39  | 0.0221 |
| 96096_f_at | 1426856_at   | Hsd12         | hydroxysteroid dehydrogenase like 2             | 1.16  | 0.46 | -1.11 | 0.2374 | 1.07  | 0.2972 | -1.15 | 0.055  | -1.01 | 0.9789 |
| 96097_at   | 1433684_at   | ---           | Similar to hypothetical protein FLJ11749        | -1.03 | 0.86 | 1.01  | 0.7939 | 1.03  | 0.6211 | 1.02  | 0.6027 | 1.03  | 0.6484 |
| 96098_at   | 1422819_at   | Mrpl36        | mitochondrial ribosomal protein L36             | 1.15  | 0.15 | 1.03  | 0.6946 | -1.08 | 0.1425 | -1    | 0.9871 | -1.3  | 0.0336 |
| 96104_at   | 1452769_at   | 3732413111Rik | RIKEN cDNA 3732413111 gene                      | 3.83  | 0.03 | 2.65  | 0      | 2.5   | 0      | 3.42  | 0      | 2.83  | 0.0223 |
| 96109_at   | 1448890_at   | Klf2          | Kruppel-like factor 2 (lung)                    | -1.66 | 0.4  | 1.11  | 0.6416 | 1.36  | 0.1885 | 1.21  | 0.472  | -2.49 | 0.0004 |
| 96112_at   | 1423972_at   | Etfa          | electron transferring flavoprotein, alpha poly  | 1.21  | 0.07 | 1.11  | 0.1028 | 1.06  | 0.3204 | 1.17  | 0.0373 | 1.06  | 0.5981 |
| 96113_at   | 1433698_a_at | D18Wsu98e     | DNA segment, Chr 18, Wayne State Univers        | -1.01 | 0.94 | 1.12  | 0.1967 | 1.48  | 0.0023 | 1.11  | 0.4383 | 1.02  | 0.8861 |
| 96115_at   | 1438001_x_at | Dp1           | deleted in polyposis 1                          | -1.95 | 0.07 | -1.39 | 0.0387 | 1.22  | 0.0128 | -1.11 | 0.5065 | -1.17 | 0.1227 |
| 96117_r_at | 1417287_at   | H13           | histocompatibility 13                           | 1.13  | 0.34 | -1.09 | 0.18   | 1.14  | 0.0459 | -1.06 | 0.1566 | -1.54 | 0.0121 |
| 96119_s_at | 1417130_s_at | Angptl4       | angiopoietin-like 4                             | 1.15  | 0.72 | -1.15 | 0.351  | 1.48  | 0.0461 | -1.03 | 0.7373 | 1.35  | 0.2716 |
| 96120_at   | 1448234_at   | Dnajb6        | DnaJ (Hsp40) homolog, subfamily B, membe        | 1.36  | 0.1  | 1.01  | 0.9156 | 1.05  | 0.5264 | 1.07  | 0.2393 | 1.25  | 0.2651 |
| 96121_at   | 1434012_at   | 1110055N21Rik | RIKEN cDNA 1110055N21 gene                      | -1.26 | 0.27 | 1.25  | 0.0025 | 1.28  | 0.0078 | 1.22  | 0.006  | -1.5  | 0.1609 |
| 96122_at   | 1451322_at   | 2310016A09Rik | RIKEN cDNA 2310016A09 gene                      | 1.45  | 0.09 | -1.22 | 0.0149 | -1.12 | 0.0647 | -1.43 | 0.0009 | -1    | 0.9405 |
| 96123_at   | 1448550_at   | Lbp           | lipopolysaccharide binding protein              | -1.53 | 0.11 | 1.19  | 0.1469 | 1.17  | 0.2726 | 1.24  | 0.1896 | 1.38  | 0.0322 |
| 96124_at   | 1428327_at   | 2310001H13Rik | RIKEN cDNA 2310001H13 gene                      | 1.32  | 0.33 | 1     | 0.9504 | 1.03  | 0.5798 | 1.11  | 0.1327 | -1.07 | 0.609  |
| 96125_at   | 1419026_at   | Daxx          | Fas death domain-associated protein             | -1.52 | 0    | 1.73  | 0.0014 | 1.55  | 0.0122 | 1.75  | 0.0034 | 1.18  | 0.3714 |
| 96127_at   | 1415892_at   | Sgpl1         | sphingosine phosphate lyase 1                   | 1.11  | 0.69 | 1.24  | 0.0002 | -1.09 | 0.3685 | 1.16  | 0.0458 | 1.37  | 0.0291 |
| 96128_at   | 1449151_at   | Pctk3         | PCTAIRE-motif protein kinase 3                  | 1.32  | 0.11 | 1.13  | 0.1423 | -1.02 | 0.6084 | 1.22  | 0.0239 | -1.08 | 0.4029 |
| 96130_at   | 1433999_at   | Slk           | STE20-like kinase (yeast)                       | -1.12 | 0.16 | 1     | 0.9418 | 1.04  | 0.3795 | 1.05  | 0.2746 | 1.18  | 0.0453 |
| 96131_at   | 1448587_at   | Tbc1d10a      | TBC1 domain family, member 10a                  | -1.02 | 0.93 | 1.35  | 0.0241 | -1.05 | 0.8023 | -1.07 | 0.718  | 1.54  | 0.3749 |
| 96132_at   | 1449070_x_at | AB023957      | cDNA sequence AB023957                          | -1.43 | 0.39 | 1.01  | 0.9569 | -1.79 | 0.0167 | -1.14 | 0.5348 | 1.76  | 0.2086 |
| 96134_at   | 1430128_a_at | Dp111         | deleted in polyposis 1-like 1                   | 1.24  | 0.35 | 1.05  | 0.5432 | -1.06 | 0.3174 | -1.03 | 0.7969 | -1.16 | 0.1936 |
| 96135_at   | 1426964_at   | 3110003A17Rik | RIKEN cDNA 3110003A17 gene                      | 1.37  | 0.16 | 1.03  | 0.866  | -1.03 | 0.8152 | 1.04  | 0.8195 | -1.55 | 0.023  |
| 96136_at   | 1423587_a_at | Exosc10       | exosome component 10                            | 3.32  | 0.01 | -1.12 | 0.3841 | 1.01  | 0.9004 | -1.12 | 0.4245 | 1.04  | 0.9301 |



|            |              |               |                                                |       |      |       |        |       |        |       |        |       |        |
|------------|--------------|---------------|------------------------------------------------|-------|------|-------|--------|-------|--------|-------|--------|-------|--------|
| 96139_at   | 1422489_at   | Gcs1          | glucosidase 1                                  | -1.25 | 0.59 | -1.08 | 0.3424 | -1.02 | 0.6998 | -1.15 | 0.0456 | 1.16  | 0.2442 |
| 96143_at   | 1418294_at   | Epb4.114b     | erythrocyte protein band 4.1-like 4b           | -2.09 | 0.02 | -1.21 | 0.1347 | 1.09  | 0.411  | -1.24 | 0.0729 | 1.38  | 0.0699 |
| 96145_at   | 1428740_a_at | Pigt          | phosphatidylinositol glycan, class T           | -2.26 | 0.16 | -1.21 | 0.0297 | -1.33 | 0.026  | -1.36 | 0.0005 | 1.04  | 0.8773 |
| 96146_at   | 1449007_at   | Btg3          | B-cell translocation gene 3                    | 1.24  | 0.24 | 1.06  | 0.6072 | 1.55  | 0.0039 | 1.49  | 0.0098 | 2.21  | 0.0122 |
| 96147_at   | 1448916_at   | Mafg          | v-maf musculoaponeurotic fibrosarcoma onc      | -1.04 | 0.87 | 1.23  | 0.0029 | 1     | 0.9719 | 1.19  | 0.014  | 1.16  | 0.5338 |
| 96148_at   | 1452627_at   | Senp6         | SUMO/sentrin specific protease 6               | 2.3   | 0.28 | 1.14  | 0.2516 | 1.09  | 0.3983 | 1.23  | 0.1141 | 1.34  | 0.5056 |
| 96151_at   | 1429352_at   | Mocos         | molybdenum cofactor sulfurase                  | -1.31 | 0.14 | -1.28 | 0.0338 | -1.27 | 0.0109 | -1.29 | 0.014  | -1.57 | 0.0179 |
| 96152_at   | 1418022_at   | Narg1         | NMDA receptor-regulated gene 1                 | 1.49  | 0.44 | 1.14  | 0.0563 | 1.33  | 0.1209 | 1.24  | 0.0051 | 1     | 0.989  |
| 96153_at   | 1418722_at   | Ngp           | neutrophilic granule protein                   | -2.14 | 0.14 | 1.01  | 0.9369 | 1.04  | 0.737  | -1.08 | 0.5419 | 1.2   | 0.25   |
| 96154_at   | 1450107_a_at | Renbp         | renin binding protein                          | -1.09 | 0.22 | 1     | 0.9643 | 1.11  | 0.1576 | -1.01 | 0.9091 | 1.15  | 0.5315 |
| 96155_at   | 1423067_at   | Cdk5rap3      | CDK5 regulatory subunit associated protein     | 1.14  | 0.59 | -1.08 | 0.5261 | 1.27  | 0.0145 | 1.12  | 0.2484 | -1.79 | 0.072  |
| 96156_at   | 1436506_a_at | 1110008H02Rik | RIKEN cDNA 1110008H02 gene                     | 1.17  | 0.59 | -1.01 | 0.7854 | -1.11 | 0.039  | -1.06 | 0.1101 | 1.18  | 0.1766 |
| 96157_at   | 1429615_at   | Zfp91         | zinc finger protein 91                         | 1.15  | 0.55 | -1.03 | 0.6482 | 1.15  | 0.2442 | 1.05  | 0.5521 | -1.23 | 0.2261 |
| 96158_at   | 1451125_at   | BC017133      | cDNA sequence BC017133                         | 1.49  | 0.27 | -1.19 | 0.054  | -1.04 | 0.6769 | -1.26 | 0.0013 | 1     | 0.9687 |
| 96160_at   | 1417636_at   | Slc6a9        | solute carrier family 6 (neurotransmitter tran | -1.39 | 0.06 | -1.47 | 0.0002 | -1.1  | 0.1977 | -1.5  | 0      | -1.46 | 0.0508 |
| 96162_at   | 1427238_at   | Fbxo15        | F-box protein 15                               | 1.14  | 0.7  | -1.16 | 0.5992 | -1.19 | 0.6257 | -1.16 | 0.6581 | -1.08 | 0.8844 |
| 96165_at   | 1433737_at   | Uhmk1         | U2AF homology motif (UHM) kinase 1             | 1.32  | 0.25 | 1.26  | 0.002  | 1.06  | 0.6446 | 1.07  | 0.3393 | -1.02 | 0.8814 |
| 96166_at   | 1452768_at   | Tex261        | testis expressed gene 261                      | 1.11  | 0.26 | -1.07 | 0.4923 | -1.13 | 0.1881 | 1.07  | 0.4143 | -1.25 | 0.0723 |
| 96167_at   | 1422452_at   | Bag3          | Bcl2-associated athanogene 3                   | -1.06 | 0.87 | 1.02  | 0.8682 | 1.24  | 0.1131 | -1.16 | 0.1433 | -1.73 | 0.0515 |
| 96168_at   | 1455990_at   | Kif23         | kinesin family member 23                       | 2.46  | 0.02 | 1.47  | 0.0644 | -1.2  | 0.4943 | 1.21  | 0.4849 | 2.63  | 0.0384 |
| 96169_at   | 1424152_at   | Sall4         | sal-like 4 (Drosophila)                        | -3.07 | 0.38 | 1.01  | 0.9199 | -1.13 | 0.4757 | -1.07 | 0.5057 | -1.03 | 0.9064 |
| 96171_at   | 1448446_at   | Deaf1         | deformed epidermal autoregulatory factor 1     | 1.23  | 0.35 | -1.31 | 0.0108 | 1.18  | 0.317  | -1.07 | 0.4927 | -1.4  | 0.1718 |
| 96172_at   | 1424375_s_at | Gimap4        | GTPase, IMAP family member 4                   | -1.11 | 0.53 | 1.25  | 0.0986 | -1    | 0.9896 | 1.17  | 0.1929 | 1.56  | 0.0068 |
| 96174_at   | 1427886_at   | Pom121        | nuclear pore membrane protein 121              | -1.06 | 0.78 | 1.01  | 0.8549 | 1.12  | 0.2655 | 1.04  | 0.432  | 1.46  | 0.0557 |
| 96176_at   | 1455013_at   | Arih2         | ariadne homolog 2 (Drosophila)                 | -1.1  | 0.56 | 1.11  | 0.2046 | 1.21  | 0.0126 | 1.05  | 0.4543 | 1.01  | 0.9642 |
| 96177_at   | 1417967_at   | Mms19l        | MMS19 (MET18 S. cerevisiae)-like               | 1.63  | 0.2  | 1.07  | 0.3891 | 1.11  | 0.3023 | 1.22  | 0.0222 | -2.1  | 0.0122 |
| 96178_at   | 1433433_at   | Myst2         | MYST histone acetyltransferase 2               | 1.07  | 0.51 | 1.08  | 0.0743 | 1.1   | 0.0887 | 1.1   | 0.1808 | 1.26  | 0.0584 |
| 96183_at   | 1421142_s_at | Foxp1         | forkhead box P1                                | -1.25 | 0.56 | 1.18  | 0.0803 | 1.07  | 0.6451 | 1.28  | 0.14   | 2.13  | 0.0013 |
| 96184_at   | 1454753_at   | Rnpepl1       | arginyl aminopeptidase (aminopeptidase B)-     | 1.31  | 0.26 | -1.3  | 0.0021 | 1.16  | 0.1889 | -1.18 | 0.1657 | -1.42 | 0.0063 |
| 96185_at   | 1417964_at   | Ap3d1         | adaptor-related protein complex 3, delta s     | 1.17  | 0.38 | 1.12  | 0.083  | 1.16  | 0.1249 | 1.12  | 0.0144 | -1.04 | 0.6736 |
| 96186_at   | 1416836_at   | Lrp10         | low-density lipoprotein receptor-related prote | 1.18  | 0.28 | -1.21 | 0.017  | -1.05 | 0.6366 | -1.1  | 0.2722 | -1.41 | 0.0208 |
| 96187_at   | 1452209_at   | Pkp4          | plakophilin 4                                  | 1.56  | 0.34 | 1.04  | 0.3585 | 1.17  | 0.1348 | 1     | 0.9171 | 1.03  | 0.8235 |
| 96188_at   | 1425405_a_at | Adar          | adenosine deaminase, RNA-specific              | -1.32 | 0.36 | 1.01  | 0.9474 | -1.24 | 0.1585 | -1.22 | 0.1381 | -1.06 | 0.8619 |
| 96189_at   | 1418820_s_at | Zcchc10       | zinc finger, CCHC domain containing 10         | 1.4   | 0.17 | 1.02  | 0.8567 | 1.03  | 0.8138 | 1.03  | 0.8004 | 1     | 0.9954 |
| 96191_at   | 1415711_at   | Arfgef1       | ADP-ribosylation factor guanine nucleotide-e   | -1.29 | 0.14 | -1.03 | 0.5368 | -1.01 | 0.8557 | -1.04 | 0.4176 | -1.2  | 0.0277 |
| 96195_at   | 1416716_at   | Efs           | embryonal Fyn-associated substrate             | -1.46 | 0.26 | -1.3  | 0.03   | 1.09  | 0.4328 | -1.24 | 0.0623 | 1.48  | 0.0281 |
| 96197_f_at | 1416574_at   | 5730589K01Rik | RIKEN cDNA 5730589K01 gene                     | 1.24  | 0.12 | 1.02  | 0.7875 | 1.02  | 0.8723 | 1.04  | 0.6243 | -1.09 | 0.2375 |
| 96198_at   | 1418085_at   | Prkcz         | protein kinase C, zeta                         | 1.96  | 0.06 | -1.08 | 0.4582 | -1.02 | 0.904  | -1.17 | 0.2417 | 1.84  | 0.1413 |
| 96199_at   | 1416934_at   | Mtm1          | X-linked myotubular myopathy gene 1            | 1.08  | 0.58 | 1.06  | 0.333  | 1.36  | 0.0021 | 1.23  | 0.0147 | -1.3  | 0.14   |
| 96200_at   | 1423683_at   | Cdca4         | cell division cycle associated 4               | -1.04 | 0.89 | 1.09  | 0.3601 | 1.11  | 0.2509 | 1.2   | 0.0621 | 1.38  | 0.0221 |
| 96203_at   | 1424713_at   | Calml4        | calmodulin-like 4                              | 1.37  | 0.23 | -1.19 | 0.3308 | 1.32  | 0.1097 | 1.36  | 0.3623 | 1.14  | 0.7051 |
| 96205_at   | 1422644_at   | Sh3bgr        | SH3-binding domain glutamic acid-rich prote    | 1.48  | 0.65 | 1.1   | 0.7885 | -1.48 | 0.2426 | -1.21 | 0.5887 | 1.98  | 0.206  |
| 96206_at   | 1424468_s_at | Phldb1        | pleckstrin homology-like domain, family B, r   | 2.04  | 0.1  | -1.38 | 0.0886 | -1.01 | 0.9534 | -1.13 | 0.4454 | 1.09  | 0.7888 |
| 96207_at   | 1434005_at   | Rbms1         | RIKEN cDNA 6030432P03 gene                     | 1.61  | 0.05 | 1.73  | 0.0011 | 1.44  | 0.0432 | 1.9   | 0      | 2.52  | 0.0111 |
| 96208_at   | 1434009_at   | 6430596G11Rik | RIKEN cDNA 6430596G11 gene                     | 1.05  | 0.85 | 1.27  | 0.0709 | 1.36  | 0.0234 | 1.17  | 0.2099 | -1.16 | 0.213  |
| 96211_at   | 1428698_at   | 2310004I03Rik | RIKEN cDNA 2310004I03 gene                     | -1.19 | 0.34 | -1.21 | 0.0881 | -1.05 | 0.6431 | -1.09 | 0.3515 | 1.13  | 0.3348 |
| 96212_at   | 1437985_a_at | 2310061I04Rik | RIKEN cDNA 2310061I04 gene                     | 1.74  | 0.04 | 1.11  | 0.1401 | -1.1  | 0.2256 | 1.09  | 0.1432 | 1.01  | 0.8386 |
| 96215_f_at | 1427820_at   | ---           | Mus musculus, clone IMAGE:3983821, mRN         | -2.84 | 0.17 | 1.21  | 0.1922 | 1.5   | 0.0157 | 1.82  | 0.0029 | -1.03 | 0.8695 |
| 96216_at   | 1451219_at   | Ormdl1        | ORM1-like 1 (S. cerevisiae)                    | -1.3  | 0.42 | -1.02 | 0.8256 | -1.04 | 0.8958 | -1.08 | 0.5507 | -1.41 | 0.2409 |
| 96217_at   | 1434230_at   | ---           | ---                                            | 1.26  | 0.11 | 1.09  | 0.3893 | -1.17 | 0.0758 | 1.09  | 0.3429 | -1.05 | 0.7655 |
| 96218_at   | 1434309_at   | Fntb          | farnesyltransferase, CAAX box, beta            | -1.08 | 0.48 | -1.07 | 0.601  | -1.05 | 0.6738 | -1.19 | 0.154  | 1.07  | 0.7157 |
| 96219_at   | 1450675_at   | 1810031K02Rik | RIKEN cDNA 1810031K02 gene                     | 1.24  | 0.2  | 1.07  | 0.3913 | -1.01 | 0.9108 | 1.13  | 0.1001 | 1.33  | 0.0099 |
| 96220_at   | 1437198_at   | ---           | ---                                            | -1.19 | 0.54 | 1.14  | 0.2529 | 1.14  | 0.3032 | 1.06  | 0.5329 | -1.62 | 0.0161 |

|            |              |               |                                                 |       |      |       |        |       |        |       |        |       |        |
|------------|--------------|---------------|-------------------------------------------------|-------|------|-------|--------|-------|--------|-------|--------|-------|--------|
| 96221_at   | 1448508_at   | Traf3ip2      | Traf3 interacting protein 2                     | -1.4  | 0.43 | -1.1  | 0.4711 | -1.27 | 0.0568 | -1.28 | 0.078  | 1.32  | 0.2677 |
| 96222_at   | 1438278_a_at | BC003993      | cDNA sequence BC003993                          | 1.32  | 0.33 | 1.45  | 0.0309 | 1.45  | 0.0374 | 1.37  | 0.0806 | 1.06  | 0.8103 |
| 96223_at   | 1433606_at   | Mitc1         | MAD homolog 4 interacting transcription coe     | -1.67 | 0.38 | -1.04 | 0.8773 | -1.18 | 0.4633 | 1.18  | 0.4177 | 1.6   | 0.2763 |
| 96224_at   | 1425680_a_at | Btrc          | beta-transducin repeat containing protein       | 1.25  | 0.3  | 1.07  | 0.4544 | -1.01 | 0.876  | 1.11  | 0.2345 | 1.14  | 0.285  |
| 96226_at   | 1451180_a_at | C330027I04Rik | RIKEN cDNA C330027I04 gene                      | -1.11 | 0.65 | 1.03  | 0.5923 | -1.07 | 0.1934 | 1     | 0.9552 | 1.53  | 0.0484 |
| 96227_at   | 1448506_at   | Serpina6      | serine (or cysteine) proteinase inhibitor, clac | 2.95  | 0    | 1.12  | 0.023  | -1    | 0.9727 | 1.11  | 0.0045 | 2.92  | 0.0004 |
| 96228_at   | 1448804_at   | Cyp11a1       | cytochrome P450, family 11, subfamily a, pc     | -1.74 | 0.39 | 1.16  | 0.5091 | 1.07  | 0.698  | 1.02  | 0.9211 | 1.5   | 0.4004 |
| 96229_at   | 1421946_at   | Crp           | C-reactive protein, petaxin related             | -1.69 | 0.01 | -1.3  | 0.0007 | -1.15 | 0.0387 | -1.27 | 0.0367 | 1.22  | 0.1449 |
| 96230_at   | 1433958_at   | 9830165K03Rik | RIKEN cDNA 9830165K03 gene                      | 1.6   | 0.47 | 1.52  | 0.0332 | 1.32  | 0.2315 | 1.04  | 0.7823 | 2.08  | 0.0579 |
| 96231_at   | 1424242_at   | Bphl          | biphenyl hydrolase-like (serine hydrolase, br   | 1.11  | 0.6  | -1.21 | 0.0136 | -1.19 | 0.024  | -1.4  | 0.0034 | -1.5  | 0.0016 |
| 96232_at   | 1451231_a_at | Cul2          | cullin 2                                        | 1.01  | 0.98 | -1.11 | 0.4333 | 1.02  | 0.8466 | -1.16 | 0.1534 | -1.48 | 0.0029 |
| 96234_at   | 1422855_at   | Cpsf3         | cleavage and polyadenylation specificity fac    | 1.54  | 0.03 | 1.02  | 0.8201 | 1.17  | 0.1926 | 1.21  | 0.0225 | 1     | 0.9781 |
| 96236_at   | 1425554_a_at | Cdc16         | CDC16 cell division cycle 16 homolog (S. ce     | 1.08  | 0.78 | -1.03 | 0.6485 | 1.07  | 0.4633 | 1.03  | 0.6319 | 1.09  | 0.6587 |
| 96237_at   | 1424729_at   | BC054059      | cDNA sequence BC054059                          | 1.47  | 0.37 | -1.11 | 0.7136 | 1.04  | 0.9197 | 1.03  | 0.9195 | 1.88  | 0.1795 |
| 96238_at   | 1434549_at   | Rab11a        | RAB11a, member RAS oncogene family              | 1.46  | 0.07 | 1.06  | 0.5496 | 1.05  | 0.7992 | 1.16  | 0.2528 | -1.35 | 0.1673 |
| 96239_at   | 1418121_at   | Vrk3          | vaccinia related kinase 3                       | 1.32  | 0.1  | 1.1   | 0.1808 | 1.18  | 0.0504 | 1.26  | 0.0186 | -1.48 | 0.0134 |
| 96240_at   | 1434784_s_at | D15Erd405e    | DNA segment, Chr 15, ERATO Doi 405, exp         | -1.01 | 0.89 | -1.15 | 0.0393 | -1.12 | 0.0165 | -1.08 | 0.2091 | 1.03  | 0.8792 |
| 96243_f_at | 1436689_a_at | Aldh9a1       | aldehyde dehydrogenase 9, subfamily A1          | 1.14  | 0.59 | -1.16 | 0.0162 | 1.02  | 0.8641 | -1.09 | 0.2806 | -1.5  | 0.0157 |
| 96244_at   | 1448260_at   | Uchl1         | ubiquitin carboxy-terminal hydrolase L1         | 1.1   | 0.65 | -1.43 | 0.245  | 1.54  | 0.4045 | -1.58 | 0.1506 | -1.05 | 0.9031 |
| 96245_at   | 1423815_at   | Ddx56         | DEAD (Asp-Glu-Ala-Asp) box polypeptide 5f       | 1.12  | 0.43 | -1.15 | 0.0023 | -1.01 | 0.8988 | -1.12 | 0.0336 | 1.15  | 0.1066 |
| 96252_at   | 1449674_s_at | ---           | ---                                             | -1.17 | 0.15 | -1.07 | 0.0582 | 1.01  | 0.8207 | -1    | 0.9446 | 1.04  | 0.7775 |
| 96254_at   | 1416755_at   | Dnajb1        | DnaJ (Hsp40) homolog, subfamily B, membr        | 1.22  | 0.46 | -1.01 | 0.9458 | 1.16  | 0.2699 | -1.2  | 0.204  | 1.24  | 0.3843 |
| 96255_at   | 1416923_a_at | Bnip3l        | BCL2/adenovirus E1B 19kDa-interacting prc       | 1.31  | 0.17 | -1.15 | 0.008  | 1.12  | 0.3399 | -1.02 | 0.8061 | -1.16 | 0.2958 |
| 96256_at   | 1416292_at   | ---           | ---                                             | -1.02 | 0.93 | -1.06 | 0.5175 | -1.04 | 0.6121 | -1.12 | 0.1367 | -1.48 | 0.0039 |
| 96257_at   | 1415751_at   | Hp1bp3        | heterochromatin protein 1, binding protein 3    | 1.05  | 0.67 | 1.18  | 0.0503 | 1.03  | 0.7205 | 1.24  | 0.0065 | 1.3   | 0.0721 |
| 96259_at   | 1417386_at   | Npepps        | aminopeptidase puromycin sensitive              | 1.3   | 0.22 | 1.14  | 0.0087 | 1.17  | 0.0039 | 1.16  | 0.0017 | 1.32  | 0.0551 |
| 96260_at   | 1416038_at   | AL033314      | expressed sequence AL033314                     | -1.14 | 0.77 | 1.15  | 0.0317 | 1.1   | 0.3926 | 1.2   | 0.0133 | 1.39  | 0.1443 |
| 96261_at   | 1433616_a_at | 2310028O11Rik | RIKEN cDNA 2310028O11 gene /// similar to       | 1.4   | 0.08 | -1.01 | 0.7409 | 1.04  | 0.3987 | 1.06  | 0.2468 | -1.23 | 0.1816 |
| 96262_at   | 1424684_at   | Rab5c         | RAB5C, member RAS oncogene family               | 1.11  | 0.63 | 1.02  | 0.861  | -1.01 | 0.876  | -1.01 | 0.8391 | -1.11 | 0.3324 |
| 96263_at   | 1423119_at   | Rshl2         | radial spokehead-like 2                         | 1.5   | 0.39 | 1.15  | 0.3909 | -1.08 | 0.6245 | 1.01  | 0.9308 | -1.9  | 0.1878 |
| 96264_at   | 1416281_at   | Wdr45l        | Wdr45 like                                      | -1.01 | 0.92 | -1.22 | 0.0378 | -1.06 | 0.3909 | -1.33 | 0.0071 | -1.29 | 0.0192 |
| 96266_at   | 1426698_a_at | Hnrpm         | heterogeneous nuclear ribonucleoprotein M       | 1.14  | 0.57 | 1.11  | 0.3501 | 1.05  | 0.589  | 1.14  | 0.2782 | 1.17  | 0.1529 |
| 96267_at   | 1415967_at   | Ndufv1        | NADH dehydrogenase (ubiquinone) flavoprc        | 1.19  | 0.1  | 1.08  | 0.3317 | 1.13  | 0.268  | 1.16  | 0.0353 | 1.21  | 0.1285 |
| 96268_at   | 1415891_at   | Suclg1        | succinate-CoA ligase, GDP-forming, alpha s      | 1.6   | 0    | 1.25  | 0.0095 | 1.14  | 0.005  | 1.3   | 0.002  | 1.15  | 0.1704 |
| 96269_at   | 1451122_at   | Ildi1         | isopentenyl-diphosphate delta isomerase         | -1.08 | 0.73 | -1.5  | 0.0368 | 1.07  | 0.8064 | -2.01 | 0.0015 | -4.02 | 0.0094 |
| 96271_at   | 1448623_at   | 2310075C12Rik | RIKEN cDNA 2310075C12 gene                      | 1.13  | 0.65 | 1.52  | 0      | 1.09  | 0.46   | 1.44  | 0.002  | -1.22 | 0.0605 |
| 96272_at   | 1420842_at   | Ptpfr         | protein tyrosine phosphatase, receptor type,    | -1.02 | 0.7  | -1.1  | 0.1104 | -1.02 | 0.7437 | -1.11 | 0.1082 | -1.28 | 0.058  |
| 96273_at   | 1423231_at   | Nrgn          | neurogranin                                     | -1.8  | 0.16 | -1.15 | 0.2381 | -1.17 | 0.1232 | 1.01  | 0.9424 | 1.66  | 0.1778 |
| 96276_r_at | 1416509_at   | MGI:1914262   | SM-11044 binding protein                        | 1.44  | 0.23 | 1.04  | 0.7918 | -1.14 | 0.2017 | 1.03  | 0.7981 | -1.14 | 0.3668 |
| 96277_at   | 1448129_at   | Arcp5         | actin related protein 2/3 complex, subunit 5    | 1.19  | 0.51 | -1.08 | 0.0605 | -1.08 | 0.3324 | 1.01  | 0.8998 | 1.13  | 0.121  |
| 96278_at   | 1423686_a_at | 1110020C13Rik | RIKEN cDNA 1110020C13 gene                      | 1.27  | 0.4  | -1.07 | 0.4433 | -1.21 | 0.1007 | -1.18 | 0.0756 | -1.16 | 0.1    |
| 96280_at   | 1417368_s_at | Ndufa2        | NADH dehydrogenase (ubiquinone) 1 alpha         | 1.53  | 0.02 | 1.23  | 0.0022 | 1.04  | 0.3963 | 1.2   | 0.0151 | 1.25  | 0.4203 |
| 96281_at   | 1423256_a_at | Atp6v1g1      | ATPase, H+ transporting, V1 subunit G isofo     | -1.41 | 0.14 | 1.04  | 0.6802 | 1.12  | 0.3114 | -1.03 | 0.5954 | -1.35 | 0.0012 |
| 96283_at   | 1415961_at   | Iitm2c        | integral membrane protein 2C                    | 1.1   | 0.65 | 1     | 0.9767 | -1.09 | 0.156  | 1.11  | 0.5278 | 1.1   | 0.507  |
| 96284_at   | 1423370_a_at | Csnk1g2       | casein kinase 1, gamma 2                        | -1.1  | 0.7  | 1.06  | 0.2931 | -1.02 | 0.8726 | 1.05  | 0.3579 | 1.09  | 0.7326 |
| 96285_at   | 1439389_s_at | Myadm         | myeloid-associated differentiation marker       | -1.54 | 0.04 | 1.15  | 0.1052 | -1.06 | 0.4257 | 1.2   | 0.0704 | 1.18  | 0.2703 |
| 96286_at   | 1423185_a_at | Ubap1         | ubiquitin-associated protein 1                  | -1.55 | 0.03 | -1.12 | 0.0434 | -1.05 | 0.2602 | -1.11 | 0.1764 | -1.44 | 0.0109 |
| 96287_at   | 1419269_at   | Dut           | deoxyuridine triphosphatase                     | 1.35  | 0.35 | 1.07  | 0.8108 | -1.15 | 0.5546 | -1.55 | 0.1582 | -1.24 | 0.2539 |
| 96288_at   | 1424058_at   | 1190002C06Rik | RIKEN cDNA 1190002C06 gene                      | 1.26  | 0.01 | -1.04 | 0.5609 | 1.07  | 0.3463 | -1.02 | 0.7447 | -1.37 | 0.1309 |
| 96289_at   | 1448774_at   | Stoml2        | stomatin (Epb7.2)-like 2                        | -1.11 | 0.69 | 1.01  | 0.8864 | 1.05  | 0.6283 | -1.06 | 0.3208 | -1.12 | 0.0249 |
| 96292_r_at | 1433603_at   | Ndufs6        | NADH dehydrogenase (ubiquinone) Fe-S pr         | 1     | 0.99 | 1.04  | 0.2788 | 1.05  | 0.309  | 1.03  | 0.5288 | -1.07 | 0.5021 |
| 96294_s_at | 1416439_at   | 2410015N17Rik | RIKEN cDNA 2410015N17 gene                      | 1.37  | 0.17 | 1.03  | 0.5516 | 1.11  | 0.143  | 1.15  | 0.0974 | 1.54  | 0.0021 |
| 96295_at   | 1451064_a_at | Psat1         | phosphoserine aminotransferase 1                | 1.76  | 0.2  | 1.49  | 0.1594 | 1.03  | 0.9265 | 1.32  | 0.3971 | 1.44  | 0.1684 |

|            |              |                 |                                                |       |      |       |        |       |        |       |        |       |        |
|------------|--------------|-----------------|------------------------------------------------|-------|------|-------|--------|-------|--------|-------|--------|-------|--------|
| 96296_at   | 1435232_x_at | ---             | ---                                            | 1.37  | 0.36 | -1.09 | 0.2199 | -1.02 | 0.6473 | -1.07 | 0.513  | 1.03  | 0.643  |
| 96298_f_at | 1456125_a_at | Dnclc1          | dynein, cytoplasmic, light chain 1             | -1.02 | 0.81 | -1.07 | 0.673  | 1.3   | 0.0617 | 1.22  | 0.185  | 1.16  | 0.3164 |
| 96299_at   | 1428286_at   | 2900097C17Rik   | RIKEN cDNA 2900097C17 gene                     | 1.54  | 0.02 | 1.36  | 0.0328 | 1.05  | 0.5624 | 1.25  | 0.0396 | 1.3   | 0.0308 |
| 96301_at   | 1460699_at   | Rps27           | ribosomal protein S27                          | -1.16 | 0.36 | -1.07 | 0.2402 | -1.07 | 0.2827 | -1.08 | 0.2119 | 1.16  | 0.064  |
| 96305_at   | 1433611_s_at | ---             | ---                                            | 1.64  | 0.2  | -1.06 | 0.6333 | 1.02  | 0.8676 | -1.06 | 0.5955 | -1.36 | 0.0152 |
| 96306_at   | 1428494_a_at | Polr2i          | polymerase (RNA) II (DNA directed) polypep     | -1.34 | 0.71 | -1.13 | 0.2831 | 1.4   | 0.2078 | -1.01 | 0.9321 | 1.18  | 0.3632 |
| 96307_s_at | 1427875_a_at | 1100001I22Rik   | RIKEN cDNA 1100001I22 gene                     | -1.16 | 0.33 | 1.04  | 0.2797 | 1.2   | 0.0126 | 1.09  | 0.2063 | 1.38  | 0.0439 |
| 96310_at   | 1425264_s_at | Mbp             | myelin basic protein                           | -1.28 | 0.42 | 1.28  | 0.0625 | 1     | 0.971  | 1.16  | 0.2763 | 2.24  | 0.0247 |
| 96311_at   | 1433532_a_at | Mbp             | myelin basic protein                           | -1.69 | 0.39 | -1.2  | 0.3509 | -1.05 | 0.7617 | -1.14 | 0.5334 | 1.09  | 0.7149 |
| 96313_at   | 1422600_at   | Rasgrf1         | RAS protein-specific guanine nucleotide-rele   | 2.45  | 0.07 | 1.6   | 0.3933 | 1.01  | 0.976  | 1.17  | 0.6965 | 1.55  | 0.2512 |
| 96318_at   | 1416696_at   | D17Wsu104e      | DNA segment, Chr 17, Wayne State Univer        | 1.11  | 0.7  | -1.27 | 0      | -1.05 | 0.5701 | -1.33 | 0      | -1.42 | 0.0028 |
| 96319_at   | 1416664_at   | Cdc20           | cell division cycle 20 homolog (S. cerevisiae  | -1.47 | 0.21 | 1.1   | 0.4624 | -1.1  | 0.3701 | 1.14  | 0.3165 | 1.16  | 0.1305 |
| 96320_at   | 1424038_a_at | 2310044H10Rik   | RIKEN cDNA 2310044H10 gene                     | -1.02 | 0.83 | -1.21 | 0.0075 | 1.01  | 0.8967 | -1.33 | 0.0003 | -1.13 | 0.3515 |
| 96321_at   | 1416663_at   | Ndufa9          | NADH dehydrogenase (ubiquinone) 1 alpha        | 1.51  | 0.02 | 1     | 0.9709 | 1.08  | 0.3263 | 1.07  | 0.3506 | 1.22  | 0.0277 |
| 96322_at   | 1448266_at   | Edf1            | endothelial differentiation-related factor 1   | 1.18  | 0.49 | -1.08 | 0.1334 | 1.11  | 0.0271 | -1.01 | 0.8935 | -1.59 | 0.0984 |
| 96325_at   | 1451078_at   | 2510039O18Rik   | RIKEN cDNA 2510039O18 gene                     | 1.11  | 0.55 | 1.13  | 0.1091 | 1.09  | 0.1617 | 1.13  | 0.0289 | 1.05  | 0.6316 |
| 96326_at   | 1451557_at   | Tat             | tyrosine aminotransferase                      | -1.46 | 0.08 | -1.03 | 0.7747 | 1.03  | 0.8321 | 1.01  | 0.8846 | 1.28  | 0.2142 |
| 96327_at   | 1415689_s_at | Zfp306          | zinc finger protein 306                        | -1.06 | 0.42 | 1.44  | 0.0002 | 1.29  | 0.0453 | 1.56  | 0      | -1.03 | 0.8822 |
| 96329_at   | 1416438_at   | 2410104I19Rik   | RIKEN cDNA 2410104I19 gene                     | 1.23  | 0.3  | 1.03  | 0.5281 | 1.08  | 0.1532 | 1.1   | 0.0584 | -1.07 | 0.5367 |
| 96331_at   | 1460224_at   | Snx2            | sorting nexin 2                                | 1.5   | 0.21 | 1.41  | 0.0013 | 1.42  | 0.0102 | 1.58  | 0      | 1.64  | 0.0047 |
| 96334_f_at | 1423244_at   | LOC433247       | similar to Cytochrome P450, family 2, subfar   | -1.22 | 0.14 | -1.63 | 0      | -1.05 | 0.3257 | -1.69 | 0      | -1.05 | 0.752  |
| 96335_at   | 1447961_s_at | Mrp138          | mitochondrial ribosomal protein L38            | 1.02  | 0.8  | 1.03  | 0.5531 | 1.09  | 0.2906 | 1.03  | 0.481  | 1.04  | 0.6869 |
| 96337_at   | 1452357_at   | Gp1bb /// Sept5 | glycoprotein Ib, beta polypeptide /// septin 5 | -1.93 | 0.14 | -1.08 | 0.7532 | 1.22  | 0.3947 | -1.12 | 0.6539 | 2.57  | 0.0095 |
| 96338_at   | 1416533_at   | Egln2           | EGL nine homolog 2 (C. elegans)                | 1.44  | 0.15 | 1.11  | 0.0287 | 1.15  | 0.0864 | 1.19  | 0.0003 | 1.28  | 0.1876 |
| 96340_at   | 1423707_at   | B230114J08Rik   | RIKEN cDNA B230114J08 gene                     | 1.4   | 0.2  | -1.04 | 0.7399 | 1.15  | 0.0524 | -1.03 | 0.7896 | -1.13 | 0.5094 |
| 96341_at   | 1424104_at   | MGI:1915842     | GCIP-interacting protein p29                   | 1.24  | 0.2  | 1.22  | 0.0004 | 1.22  | 0.0034 | 1.2   | 0.0002 | -1.06 | 0.6301 |
| 96342_at   | 1419287_at   | MGI:1913570     | HSPC171 protein                                | 1.09  | 0.74 | -1.04 | 0.4148 | 1.11  | 0.1405 | -1.05 | 0.3596 | -1.28 | 0.0707 |
| 96344_at   | 1417951_at   | Eno3            | enolase 3, beta muscle                         | 1.15  | 0.53 | -1.4  | 0.2622 | -1.43 | 0.2348 | -1.38 | 0.2903 | 1.22  | 0.0832 |
| 96345_at   | 1423548_s_at | SDBCag84        | serologically defined breast cancer antigen 8  | 1.37  | 0.23 | -1.01 | 0.9053 | 1.07  | 0.4309 | -1.4  | 0.0009 | -1.45 | 0.0471 |
| 96346_at   | 1448842_at   | Cdo1            | cysteine dioxygenase 1, cytosolic              | -1.06 | 0.3  | 1.16  | 0.0098 | 1.11  | 0.069  | 1.22  | 0.0006 | 1.33  | 0.0349 |
| 96348_at   | 1428143_a_at | Pnpla2          | patatin-like phospholipase domain containin    | 1.32  | 0.22 | 1.27  | 0.0004 | 1.32  | 0.1523 | 1.6   | 0      | 1.29  | 0.0991 |
| 96352_at   | 1448718_at   | 2400001E08Rik   | RIKEN cDNA 2400001E08 gene                     | -1.14 | 0.52 | -1.1  | 0.1734 | -1.18 | 0.0169 | -1.18 | 0.0008 | -1.13 | 0.4759 |
| 96353_at   | 1416479_a_at | Tmem14c         | transmembrane protein 14C                      | 1.35  | 0.05 | -1.05 | 0.2653 | -1.05 | 0.2692 | -1.06 | 0.273  | -1.34 | 0.1081 |
| 96354_at   | 1416904_at   | Mbnl1           | muscleblind-like 1 (Drosophila)                | 1.36  | 0.03 | 1.2   | 0.021  | 1.05  | 0.3587 | 1.16  | 0.0634 | 1.12  | 0.5713 |
| 96358_at   | 1460175_at   | Rps23           | ribosomal protein S23                          | -1.17 | 0.46 | 1.14  | 0.0281 | 1.18  | 0.0555 | 1.21  | 0.0291 | 1.47  | 0.0124 |
| 96359_at   | 1419869_s_at | Hdlbp           | high density lipoprotein (HDL) binding protei  | -1.24 | 0.13 | -1    | 0.9933 | 1.1   | 0.0842 | 1.03  | 0.5482 | -1.09 | 0.1929 |
| 96360_at   | 1451168_a_at | Arhgdia         | Rho GDP dissociation inhibitor (GDI) alpha     | 1.18  | 0.49 | 1.09  | 0.3583 | -1.1  | 0.3704 | 1.13  | 0.3317 | 1.62  | 0.0327 |
| 96365_at   | 1459092_at   | Sloc6c1         | solute carrier organic anion transporter famil | 1.14  | 0.83 | 1.32  | 0.5234 | -1.55 | 0.2203 | 1.11  | 0.7603 | -1.83 | 0.3063 |
| 96367_at   | 1442494_at   | C79242          | expressed sequence C79242                      | -1.01 | 0.99 | -1.24 | 0.0538 | 1.25  | 0.0797 | -1.15 | 0.4346 | 1.19  | 0.7336 |
| 96373_at   | 1459930_at   | ---             | ---                                            | 1     | 0.98 | -1.19 | 0.0879 | -1.11 | 0.1929 | -1.19 | 0.056  | 1.35  | 0.2238 |
| 96374_at   | 1449704_at   | C80171          | expressed sequence C80171                      | -1.65 | 0.08 | -1.39 | 0.1881 | -1.11 | 0.6145 | -1.54 | 0.1338 | 1.13  | 0.7194 |
| 96375_at   | 1442484_at   | D9ErtD306e      | DNA segment, Chr 9, ERATO Doi 306, expr        | -1.59 | 0.48 | -1.17 | 0.1902 | -1.19 | 0.0919 | -1.06 | 0.5563 | 1.58  | 0.0463 |
| 96388_at   | 1419953_at   | C80678          | expressed sequence C80678                      | 1.06  | 0.93 | -1.07 | 0.825  | 1.06  | 0.8327 | 1.29  | 0.1663 | 1.29  | 0.6641 |
| 96389_at   | 1447978_at   | C80719          | expressed sequence C80719                      | -1.27 | 0.43 | -1.18 | 0.4223 | 1.14  | 0.5413 | -1.16 | 0.5239 | 1.57  | 0.3888 |
| 96390_at   | 1446572_at   | Usp53           | Ubiquitin specific protease 53                 | 1.55  | 0.59 | -1.41 | 0.0953 | -1.3  | 0.2073 | -1.61 | 0.0617 | -1.11 | 0.8097 |
| 96391_at   | 1436092_at   | ---             | Transcribed locus, moderately similar to XP    | -1.31 | 0.16 | -1.07 | 0.5564 | -1.02 | 0.8298 | -1.18 | 0.0937 | -1.16 | 0.5549 |
| 96392_at   | 1419807_at   | D4ErtD335e      | DNA segment, Chr 4, ERATO Doi 335, expr        | -1.23 | 0.06 | -1.11 | 0.3381 | -1.05 | 0.5618 | -1.17 | 0.114  | -1.01 | 0.948  |
| 96393_at   | 1419962_at   | Depdc6          | DEP domain containing 6                        | 1.25  | 0.43 | 1.98  | 0.0142 | 1.36  | 0.0541 | 1.34  | 0.0333 | 1.54  | 0.1866 |
| 96394_at   | 1446378_at   | D2ErtD357e      | DNA segment, Chr 2, ERATO Doi 357, expr        | -1.27 | 0.57 | 1.14  | 0.6427 | -1.03 | 0.9317 | 1.2   | 0.6006 | 1.37  | 0.3568 |
| 96400_at   | 1421722_at   | MGI:1930074     | interferon response element binding factor 1   | 4.61  | 0.09 | -1.46 | 0.325  | 1.33  | 0.4264 | -1.39 | 0.3558 | 1.25  | 0.6646 |
| 96408_at   | 1420041_at   | ---             | ---                                            | -1.98 | 0.12 | 1.17  | 0.5353 | 1.17  | 0.3624 | 1.05  | 0.8405 | -1.15 | 0.2332 |
| 96413_at   | 1422143_at   | Akap7           | A kinase (PRKA) anchor protein 7               | 1.45  | 0.38 | -1.19 | 0.7075 | -1.39 | 0.4961 | -1.08 | 0.8679 | 1.11  | 0.841  |
| 96414_at   | 1450336_at   | ---             | ---                                            | -1.54 | 0.21 | 1.11  | 0.5302 | 1.16  | 0.6225 | 1.12  | 0.4728 | 1.49  | 0.289  |

|            |              |                                                                  |       |      |       |        |       |        |       |        |       |        |
|------------|--------------|------------------------------------------------------------------|-------|------|-------|--------|-------|--------|-------|--------|-------|--------|
| 96416_f_at | 1427864_at   | Hist2h3c1 /// Hist histone 2, H3c1 /// histone1, H3d /// histone | -1.05 | 0.29 | -1.16 | 0.1094 | 1.02  | 0.7791 | -1.33 | 0.0019 | 1.2   | 0.2073 |
| 96420_at   | 1427693_at   | Itp2                                                             | -1.03 | 0.89 | 1.12  | 0.7053 | 1.92  | 0.0438 | 1.33  | 0.3283 | 1.75  | 0.206  |
| 96421_at   | 1420470_at   | Sult1c1                                                          | 1.65  | 0.42 | 1.07  | 0.7555 | 1.06  | 0.7873 | 1.13  | 0.3885 | 1.38  | 0.5087 |
| 96422_at   | 1422284_at   | Nkx2-9                                                           | 1.17  | 0.45 | 1.45  | 0.2003 | 1.22  | 0.5534 | -1.05 | 0.7706 | 1.93  | 0.002  |
| 96423_at   | 1420555_at   | Alx3                                                             | -1.01 | 0.98 | -1.05 | 0.9064 | 1.32  | 0.4069 | -1.14 | 0.7035 | 1.18  | 0.4819 |
| 96426_at   | 1415906_at   | Tmsb4x                                                           | 1.3   | 0.25 | 1.59  | 0.2151 | -1.12 | 0.3272 | 1.85  | 0.1758 | 1.03  | 0.8777 |
| 96431_at   | 1444959_at   | D1Ertd83e                                                        | -2.13 | 0.46 | -1.08 | 0.7929 | 1.48  | 0.1742 | 1.77  | 0.0436 | 3.05  | 0.245  |
| 96435_at   | 1420754_at   | Ttf1                                                             | -1.07 | 0.49 | -1.06 | 0.4228 | -1.11 | 0.0945 | -1.15 | 0.0808 | -1.11 | 0.6375 |
| 96474_at   | 1420864_at   | Zfp161                                                           | 1.1   | 0.68 | 1.83  | 0.0259 | 1.64  | 0.1071 | 1.53  | 0.0334 | 1.53  | 0.0626 |
| 96481_at   | 1439995_at   | C80638                                                           | -1.02 | 0.96 | -1.54 | 0.1411 | -1.12 | 0.741  | -2.61 | 0.0076 | 1.68  | 0.2899 |
| 96482_at   | 1448071_at   | Lmtk2                                                            | 3.27  | 0.27 | 1.14  | 0.6958 | 1.52  | 0.3408 | 1.28  | 0.2029 | 1.77  | 0.2731 |
| 96483_at   | 1442661_at   | C80113                                                           | -1.58 | 0.41 | 1.01  | 0.928  | 1.04  | 0.7352 | -1.06 | 0.5712 | -1.63 | 0.4972 |
| 96484_at   | 1442984_at   | C80060                                                           | -1.27 | 0.58 | 1.18  | 0.4862 | 1.23  | 0.4289 | -1    | 0.9844 | 1.76  | 0.2804 |
| 96485_at   | 1442975_at   | ---                                                              | -1.01 | 0.98 | 1.54  | 0.0639 | 1.88  | 0.0723 | 1.27  | 0.1013 | 1.22  | 0.4816 |
| 96486_at   | 1443464_at   | Sntb1                                                            | -1.81 | 0.45 | 1.5   | 0.1539 | -1.47 | 0.126  | -1.08 | 0.768  | 6.99  | 0.01   |
| 96487_at   | 1442976_at   | C81072                                                           | -1.54 | 0.43 | 1.41  | 0.2328 | 1.54  | 0.0664 | 1.08  | 0.7583 | 1.51  | 0.452  |
| 96490_at   | 1435941_at   | Rhbdl4                                                           | -1.71 | 0.01 | 1.05  | 0.7779 | -1.65 | 0.0011 | -1.05 | 0.7627 | 1.08  | 0.7702 |
| 96492_at   | 1449600_at   | Gm1683                                                           | 1.08  | 0.87 | -1.11 | 0.7952 | 1.23  | 0.5113 | 1.05  | 0.9013 | 1.16  | 0.3398 |
| 96493_at   | 1460744_at   | 2810002104Rik                                                    | -1.3  | 0.02 | -1.03 | 0.7935 | -1.04 | 0.6403 | -1.07 | 0.4304 | 1.4   | 0.0342 |
| 96494_at   | 1451793_at   | 4930429H24Rik                                                    | 4.15  | 0.1  | 1.2   | 0.1847 | -1.08 | 0.6455 | -1.07 | 0.7472 | 1.14  | 0.7321 |
| 96496_g_at | 1421175_at   | Myt1l                                                            | -4.87 | 0.1  | 1.18  | 0.1746 | 1.13  | 0.4776 | -1.15 | 0.2837 | 1.69  | 0.0416 |
| 96498_at   | 1420335_at   | Dmc1h                                                            | -2.74 | 0.01 | 1.18  | 0.269  | 1.51  | 0.0272 | 1.16  | 0.3474 | -1.21 | 0.5008 |
| 96499_at   | 1449603_at   | AI594671                                                         | -4.04 | 0.32 | -1.13 | 0.6909 | -1.22 | 0.6013 | -1.07 | 0.8083 | 1.01  | 0.9902 |
| 96500_at   | 1450125_at   | Gata5                                                            | 1.16  | 0.49 | -1.03 | 0.8552 | 1.08  | 0.4969 | 1.24  | 0.3006 | 1.47  | 0.0637 |
| 96501_at   | 1418993_s_at | F10                                                              | 1.32  | 0.17 | 1.11  | 0.1294 | 1.12  | 0.0756 | 1.15  | 0.0319 | -1.06 | 0.7532 |
| 96502_at   | 1450445_at   | Phex                                                             | -1.96 | 0.2  | -1.06 | 0.7776 | 1.31  | 0.343  | 1.2   | 0.323  | 1.49  | 0.339  |
| 96503_at   | 1451551_at   | Krt2-16                                                          | -1.42 | 0.15 | 1.11  | 0.5459 | 1.09  | 0.4219 | 1.1   | 0.2139 | 1.04  | 0.8088 |
| 96504_at   | 1418208_at   | Pax8                                                             | -1.29 | 0.39 | 1.1   | 0.1438 | 1.13  | 0.0899 | -1.02 | 0.7507 | -1.1  | 0.7713 |
| 96505_at   | 1420605_at   | MGI:1860766                                                      | -2.15 | 0.26 | 1.09  | 0.6498 | -1    | 0.9869 | 1.02  | 0.8992 | 1.57  | 0.0928 |
| 96506_at   | 1449987_at   | Alk                                                              | -1.39 | 0.12 | -1.31 | 0.0012 | -1.16 | 0.1565 | -1.33 | 0.0011 | 1.09  | 0.6267 |
| 96507_at   | 1421577_at   | Evx2                                                             | -1.02 | 0.94 | -1.06 | 0.6526 | -1    | 0.9915 | 1.11  | 0.5011 | -1.24 | 0.3862 |
| 96508_at   | 1450458_at   | Ncoa2                                                            | -1.1  | 0.88 | -1.05 | 0.8095 | 1.08  | 0.6144 | 1.11  | 0.5397 | 1.5   | 0.4674 |
| 96509_at   | 1421475_at   | Ms4a2                                                            | -2.25 | 0.25 | -1.02 | 0.9463 | 1.11  | 0.7303 | -1.46 | 0.2837 | 1.07  | 0.8901 |
| 96510_at   | 1421441_at   | Angpt1                                                           | -1.33 | 0.56 | -1.16 | 0.387  | -1.11 | 0.5581 | -1.65 | 0.0206 | 1.07  | 0.9014 |
| 96513_at   | 1459917_at   | AI451896                                                         | -1.5  | 0.18 | -1.03 | 0.89   | -2.3  | 0.0007 | -1.79 | 0.0107 | 1.1   | 0.7227 |
| 96515_at   | 1419192_at   | Il4i1                                                            | 2.05  | 0.32 | 1.03  | 0.806  | 1.33  | 0.241  | 1.38  | 0.1515 | 1.6   | 0.0705 |
| 96516_at   | 1429884_at   | ---                                                              | 3.04  | 0.08 | 1.14  | 0.5011 | 1.09  | 0.6993 | 1.2   | 0.3618 | 1.11  | 0.7534 |
| 96517_at   | 1443696_s_at | Habp2                                                            | -2.46 | 0.4  | -1.21 | 0.1045 | -1.13 | 0.4801 | -1.52 | 0.0058 | -1.52 | 0.5427 |
| 96518_at   | 1420008_s_at | BC037006                                                         | 1.28  | 0.37 | 1.44  | 0.0223 | 1.31  | 0.0047 | 1.18  | 0.2    | 1.31  | 0.2419 |
| 96519_at   | 1427931_s_at | Pdxk                                                             | 4.94  | 0.03 | 1.6   | 0.0877 | 2.06  | 0.0032 | 1.59  | 0.0947 | 1.87  | 0.1507 |
| 96520_at   | 1457776_at   | D9Ertd720e                                                       | 1.12  | 0.85 | 1.81  | 0.0096 | 1.65  | 0.1127 | 1.08  | 0.7568 | 1.48  | 0.3814 |
| 96521_at   | 1450775_at   | Mos                                                              | -1.09 | 0.86 | 1.41  | 0.2853 | 1.42  | 0.3427 | -1.17 | 0.5184 | -1.09 | 0.7586 |
| 96522_at   | 1417365_a_at | Calm1                                                            | 1.04  | 0.89 | 1.04  | 0.4933 | -1.02 | 0.6602 | 1.01  | 0.8246 | -1.58 | 0.0223 |
| 96523_at   | 1418618_at   | En1                                                              | 1.45  | 0.36 | 1.35  | 0.3034 | 1.29  | 0.3721 | 1.09  | 0.735  | 1.34  | 0.4601 |
| 96524_at   | 1459911_at   | D030068L24Rik                                                    | 1.8   | 0.17 | 1.37  | 0.0864 | 1.4   | 0.0639 | 1.1   | 0.644  | -1.14 | 0.6994 |
| 96525_at   | 1448731_at   | Il10ra                                                           | -2.44 | 0.43 | 2.6   | 0.1776 | 1.12  | 0.5879 | 3.75  | 0.048  | -1.24 | 0.4153 |
| 96526_at   | 1437885_at   | D030029J20Rik                                                    | -1.29 | 0.13 | 1.53  | 0.0023 | 1.24  | 0.0992 | 1.48  | 0.0006 | 1.54  | 0.0308 |
| 96527_at   | 1419877_x_at | ---                                                              | -1.23 | 0.22 | -1.24 | 0.0405 | -1.47 | 0.0311 | -1.38 | 0.0046 | 1.3   | 0.4236 |
| 96529_at   | 1457695_at   | Ap1gbp1                                                          | -1.12 | 0.83 | 1.05  | 0.8782 | -1.04 | 0.9118 | -1.25 | 0.5534 | -1.19 | 0.6082 |
| 96530_at   | 1442006_at   | ---                                                              | 1.02  | 0.86 | 1.15  | 0.0998 | 1.26  | 0.0039 | 1.33  | 0.0016 | 1.17  | 0.3816 |
| 96533_at   | 1421998_at   | Tor3a                                                            | -1.38 | 0.08 | -1.16 | 0.1799 | 1.1   | 0.4272 | 1.02  | 0.861  | 1.07  | 0.7392 |
| 96534_at   | 1442169_at   | Vldlr                                                            | 3.26  | 0.07 | 2.32  | 0.0034 | 1.31  | 0.1732 | 2.36  | 0.003  | 5.56  | 0.0004 |
| 96535_at   | 1435802_at   | Gm157                                                            | -1.23 | 0.43 | -1.07 | 0.5018 | -1.06 | 0.5509 | -1.06 | 0.5068 | 1.01  | 0.9534 |

|            |              |                 |                                                |       |      |       |        |       |        |       |        |       |        |
|------------|--------------|-----------------|------------------------------------------------|-------|------|-------|--------|-------|--------|-------|--------|-------|--------|
| 96536_at   | 1444274_at   | ---             | Transcribed locus, moderately similar to XP_   | 4.15  | 0    | -1.12 | 0.6918 | -1.29 | 0.4404 | -1.02 | 0.9486 | -1.11 | 0.7308 |
| 96537_at   | 1420562_at   | Slurp1          | secreted Ly6/Plaur domain containing 1         | 1.13  | 0.61 | -1.18 | 0.4831 | -1.14 | 0.6039 | -1.46 | 0.1235 | -1.14 | 0.5201 |
| 96539_at   | 1440195_at   | 1200009K13Rik   | RIKEN cDNA 1200009K13 gene                     | 2.4   | 0.12 | -1.16 | 0.154  | -1.1  | 0.3282 | -1.25 | 0.0787 | -1.37 | 0.2301 |
| 96540_at   | 1449896_at   | Mlph            | melanophilin                                   | -1.35 | 0.05 | -1.07 | 0.5236 | 1.17  | 0.2568 | -1.03 | 0.8194 | 1.76  | 0.0249 |
| 96541_at   | 1434964_at   | AA408420        | expressed sequence AA408420                    | 1.22  | 0.41 | -1.46 | 0.0019 | -1.14 | 0.264  | -1.21 | 0.0667 | -1.06 | 0.7184 |
| 96542_at   | 1448255_a_at | Surf4           | surfeit gene 4                                 | -1.4  | 0.04 | -1.05 | 0.463  | -1.09 | 0.1952 | -1.1  | 0.0412 | 1.07  | 0.5943 |
| 96543_at   | 1455601_at   | ---             | LOC434299                                      | -1.45 | 0.69 | -1.48 | 0.2153 | 1.2   | 0.6174 | -2.04 | 0.0768 | 1.58  | 0.3683 |
| 96544_at   | 1419797_at   | AA672641        | expressed sequence AA672641                    | 1.93  | 0.28 | 1.85  | 0.0858 | 1.29  | 0.2377 | 1.38  | 0.2045 | -1.41 | 0.4271 |
| 96546_r_at | 1435586_at   | A730042J05Rik   | RIKEN cDNA A730042J05 gene                     | -1.18 | 0.04 | -1.03 | 0.7256 | -1.09 | 0.1933 | -1.06 | 0.2871 | 1.18  | 0.1709 |
| 96547_at   | 1419863_at   | Tmod1           | Tropomodulin 1                                 | 1.05  | 0.91 | -1.25 | 0.0391 | -1.11 | 0.3092 | -1.25 | 0.0556 | 1.7   | 0.1159 |
| 96548_at   | 1421522_at   | Galgt2          | UDP-N-acetyl-alpha-D-galactosamine:(N-ac       | 1.91  | 0.31 | 2.01  | 0.0586 | 1.92  | 0.1728 | 1.28  | 0.4772 | 1.04  | 0.9072 |
| 96549_at   | 1420761_at   | Chrnd           | cholinergic receptor, nicotinic, delta polypep | -1.24 | 0.71 | -1.08 | 0.8419 | 1.04  | 0.8965 | -1.03 | 0.9371 | 1.9   | 0.032  |
| 96550_at   | 1443706_at   | 1500002111Rik   | C1GALT1-specific chaperone 1                   | 1.23  | 0.61 | -1.5  | 0.0126 | -1.35 | 0.1063 | -1.44 | 0.0337 | 1.53  | 0.1523 |
| 96551_at   | 1420331_at   | Clec4e          | C-type lectin domain family 4, member e        | 1.07  | 0.92 | -1.09 | 0.7236 | 1.48  | 0.2935 | 1.36  | 0.3069 | 1.02  | 0.9495 |
| 96552_at   | 1442296_at   | 241011819Rik    | RIKEN cDNA 241011819 gene                      | -1.72 | 0.18 | -1.12 | 0.0949 | -1.15 | 0.0085 | -1.13 | 0.0717 | 1.28  | 0.1914 |
| 96553_at   | 1449175_at   | Gpr65           | G-protein coupled receptor 65                  | 2.04  | 0.06 | 2.09  | 0.2095 | 1.79  | 0.2182 | 3.2   | 0.1217 | -1.24 | 0.6949 |
| 96556_at   | 1457899_at   | Kalrn           | kalirin, RhoGEF kinase                         | 1.5   | 0.38 | 1.34  | 0.2148 | 1.23  | 0.1958 | 1.1   | 0.6102 | -1.18 | 0.5284 |
| 96557_at   | 1422655_at   | Ptch2           | Patched homolog 2                              | 2.11  | 0.11 | 1.01  | 0.9356 | 1.08  | 0.755  | 1.01  | 0.9785 | 2.18  | 0.2144 |
| 96558_at   | 1422816_a_at | Mutyh           | mutY homolog (E. coli)                         | 3.55  | 0    | -1.17 | 0.1705 | -1.3  | 0.0248 | -1.32 | 0.0557 | 1.01  | 0.9691 |
| 96560_at   | 1435559_at   | Myo6            | myosin VI                                      | -1.4  | 0.2  | -1.42 | 0      | 1.02  | 0.7645 | -1.44 | 0.0001 | -1.21 | 0.3161 |
| 96561_at   | 1434836_at   | Nfatc2ip        | nuclear factor of activated T-cells, cytoplasm | 1.67  | 0.18 | 1.42  | 0.0121 | 1.4   | 0.0671 | 1.04  | 0.8049 | 1.28  | 0.5172 |
| 96562_at   | 1420361_at   | Slc11a1         | solute carrier family 11 (proton-coupled diva  | -1.01 | 0.91 | 1.12  | 0.653  | -1.17 | 0.2569 | 1.14  | 0.5945 | -1.09 | 0.8775 |
| 96563_at   | 1448014_s_at | Usp24           | ubiquitin specific protease 24                 | 1.3   | 0.31 | -1.04 | 0.5643 | 1.12  | 0.0385 | -1.16 | 0.064  | -1.45 | 0.0531 |
| 96564_at   | 1420623_x_at | Hspa8           | heat shock protein 8                           | 1.43  | 0.21 | -1.07 | 0.5302 | -1.15 | 0.1465 | -1.02 | 0.8366 | 1.37  | 0.0482 |
| 96566_at   | 1421355_at   | Tgm3            | transglutaminase 3, E polypeptide              | -2.15 | 0.2  | 1.33  | 0.3047 | 1.35  | 0.2325 | 1.21  | 0.5709 | 1.06  | 0.8758 |
| 96567_at   | 1425171_at   | Rho             | rhodopsin                                      | -1.09 | 0.72 | -1.16 | 0.1795 | 1.45  | 0.312  | 1.32  | 0.4366 | -1.46 | 0.3077 |
| 96568_at   | 1420739_at   | Cntn3           | contactin 3                                    | -1    | 0.98 | 1.48  | 0.1872 | 1.09  | 0.5424 | 1.15  | 0.2808 | 1.5   | 0.2499 |
| 96569_at   | 1460746_at   | ---             | ---                                            | -1.57 | 0.07 | -1.13 | 0.1118 | -1.08 | 0.2    | -1.11 | 0.0763 | 1.3   | 0.2311 |
| 96570_at   | 1439103_at   | Hrpt2           | hyperparathyroidism 2 homolog (human)          | 3.85  | 0.01 | -1.02 | 0.906  | -1.03 | 0.8698 | -1.05 | 0.6973 | -1.01 | 0.9778 |
| 96571_at   | 1449692_at   | Prkcz           | protein kinase C, zeta                         | -1.81 | 0.38 | 1.38  | 0.181  | 1.71  | 0.1944 | 1.42  | 0.1059 | 1.5   | 0.409  |
| 96572_at   | 1448032_at   | Azi2            | 5-azacytidine induced gene 2                   | 1.29  | 0.38 | 1.14  | 0.5357 | 1.5   | 0.0759 | 1.21  | 0.1833 | 1.04  | 0.9485 |
| 96573_at   | 1415779_s_at | Actg1           | actin, gamma, cytoplasmic 1                    | 1.81  | 0.17 | 1.29  | 0.0085 | -1.27 | 0.0011 | 1.09  | 0.3944 | 1.06  | 0.5252 |
| 96574_at   | 1450565_at   | Il9             | interleukin 9                                  | -1.87 | 0.4  | 1.23  | 0.3104 | 1.22  | 0.1882 | -1.04 | 0.8679 | 1.07  | 0.7394 |
| 96575_at   | 1417762_a_at | Rpl8            | ribosomal protein L8                           | -1.03 | 0.85 | 1.05  | 0.3482 | 1.12  | 0.1704 | 1.08  | 0.1107 | 1.41  | 0.0359 |
| 96576_at   | 1449642_at   | Ebi2            | Epstein-Barr virus induced gene 2              | -1.43 | 0.02 | 1.14  | 0.2521 | 1.14  | 0.3915 | 1.37  | 0.0131 | 3.2   | 0.0045 |
| 96579_at   | 1448016_at   | ---             | Transcribed locus                              | -1.63 | 0.6  | 1.27  | 0.3214 | -1.12 | 0.7034 | -1.51 | 0.024  | -1.05 | 0.8785 |
| 96580_at   | 1421193_a_at | Pbx3            | pre B-cell leukemia transcription factor 3     | -1.24 | 0.51 | 1.05  | 0.7757 | 1.02  | 0.8432 | -1.11 | 0.5744 | 1.09  | 0.8346 |
| 96581_at   | 1421593_at   | Ncam2           | neural cell adhesion molecule 2                | -2.13 | 0.42 | 1.12  | 0.4615 | 1.48  | 0.1574 | 1.25  | 0.1042 | 1.43  | 0.1549 |
| 96582_at   | 1425301_at   | Ncam2           | neural cell adhesion molecule 2                | -1.71 | 0.42 | 1.18  | 0.6867 | 1.15  | 0.7023 | 1.18  | 0.5928 | -2.32 | 0.0633 |
| 96583_s_at | 1450249_s_at | Kif5a /// Kif5c | kinesin family member 5A /// kinesin family r  | -1.21 | 0.61 | 1.61  | 0.1735 | 1.24  | 0.5695 | 1.45  | 0.2983 | 1.69  | 0.2124 |
| 96584_f_at | 1451852_at   | MGI:2675349     | 2-cell-stage, variable group, member 3         | 1.14  | 0.85 | -1.47 | 0.1468 | -1.75 | 0.0432 | -1.9  | 0.0433 | 5.46  | 0.001  |
| 96585_at   | 1450277_at   | Avpr2           | arginine vasopressin receptor 2                | -1.66 | 0.25 | -1.4  | 0.1132 | 1.02  | 0.9179 | -1.56 | 0.0649 | 1.18  | 0.4596 |
| 96586_at   | 1422674_s_at | Crygb /// Crygc | crystallin, gamma B /// crystallin, gamma C    | -1.18 | 0.42 | 1.18  | 0.1377 | 1.19  | 0.171  | 1.05  | 0.5275 | -1.03 | 0.8962 |
| 96587_at   | 1421789_s_at | Arf3            | ADP-ribosylation factor 3                      | -1.74 | 0.01 | -1.23 | 0.0939 | -1.53 | 0.0179 | -1.3  | 0.0509 | -1    | 0.9866 |
| 96588_at   | 1450344_a_at | Ptger3          | prostaglandin E receptor 3 (subtype EP3)       | -1.21 | 0.75 | -1.41 | 0.4114 | -1.09 | 0.8638 | 1.09  | 0.8168 | -1.27 | 0.5229 |
| 96589_at   | 1425251_at   | Ptger3          | prostaglandin E receptor 3 (subtype EP3)       | 2.43  | 0.12 | -1.23 | 0.4691 | -1.26 | 0.4441 | -1.08 | 0.8501 | -2.1  | 0.1582 |
| 96590_f_at | 1429139_at   | 2900060B22Rik   | RIKEN cDNA 2900060B22 gene                     | 1.15  | 0.63 | 1.13  | 0.4506 | 1.12  | 0.6088 | 1.14  | 0.4236 | 3.37  | 0.0224 |
| 96591_at   | 1449465_at   | Reln            | reelin                                         | -1.2  | 0.32 | -1.07 | 0.4401 | 1.18  | 0.1006 | -1.02 | 0.8427 | 1.79  | 0.0076 |
| 96592_at   | 1451737_at   | Pik3r1          | phosphatidylinositol 3-kinase, regulatory sub  | 3.27  | 0.01 | -1.31 | 0.1618 | -2.22 | 0.0031 | -2.18 | 0.0034 | -2.19 | 0.2257 |
| 96593_at   | 1421896_at   | Elk1            | ELK1, member of ETS oncogene family            | -3.87 | 0    | -1.2  | 0.2276 | 1.13  | 0.2839 | -1.22 | 0.1935 | 1.46  | 0.4191 |
| 96595_at   | 1449359_at   | Pax1            | paired box gene 1                              | -3.34 | 0.13 | -1.11 | 0.421  | -1.08 | 0.4423 | -1.13 | 0.2461 | 1.28  | 0.2509 |
| 96596_at   | 1420760_s_at | Ndr1            | N-myc downstream regulated-like                | 1.08  | 0.76 | 1.38  | 0.0275 | 1.06  | 0.7089 | 1.23  | 0.1371 | 1.9   | 0.0038 |
| 96597_at   | 1421566_at   | Pet2            | plasmacytoma expressed transcript 2            | -2.09 | 0.28 | -1.74 | 0.072  | -1.57 | 0.1215 | -1.74 | 0.036  | -2.39 | 0.0152 |

|            |              |               |                                               |       |      |       |        |       |        |       |        |       |        |
|------------|--------------|---------------|-----------------------------------------------|-------|------|-------|--------|-------|--------|-------|--------|-------|--------|
| 96598_at   | 1455653_at   | Ccnj          | cyclin J                                      | 1.22  | 0.52 | -1.57 | 0.0046 | -1.07 | 0.5351 | -1.16 | 0.1992 | -1.18 | 0.5998 |
| 96599_at   | 1435420_at   | C330016K18Rik | RIKEN cDNA C330016K18 gene                    | -1.32 | 0.53 | 1.36  | 0.1044 | 1.33  | 0.0648 | 1.16  | 0.3821 | 1.48  | 0.1964 |
| 96600_at   | 1441618_at   | B130017I01Rik | RIKEN cDNA B130017I01 gene                    | -1.33 | 0.17 | -1.02 | 0.9355 | -1.81 | 0.0182 | -1.91 | 0.0159 | -2.42 | 0.372  |
| 96603_at   | 1420832_at   | Qscn6         | quiescin Q6                                   | -1.38 | 0.31 | -2.05 | 0      | -1.41 | 0.027  | -2.35 | 0      | -3.37 | 0.008  |
| 96604_at   | 1423943_at   | 1110032N12Rik | RIKEN cDNA 1110032N12 gene                    | 1.46  | 0.38 | 1.08  | 0.4021 | 1.54  | 0.0055 | 1.05  | 0.6322 | -1.47 | 0.0404 |
| 96605_at   | 1423909_at   | 0610011I04Rik | RIKEN cDNA 0610011I04 gene                    | 1.49  | 0.25 | 1.66  | 0.0067 | -1.14 | 0.1898 | 1.67  | 0.0344 | -1.75 | 0.0766 |
| 96606_at   | 1450007_at   | 1500003O03Rik | RIKEN cDNA 1500003O03 gene                    | 1.35  | 0.49 | -1.25 | 0.159  | -1.06 | 0.7535 | -1.39 | 0.0356 | -1.42 | 0.5199 |
| 96607_at   | 1420810_at   | 1500003O03Rik | RIKEN cDNA 1500003O03 gene                    | -1.22 | 0.42 | -1.19 | 0.0211 | 1.08  | 0.2126 | -1.11 | 0.2472 | -1.1  | 0.4314 |
| 96608_at   | 1460194_at   | Phyh          | phytanoyl-CoA hydroxylase                     | 1.44  | 0.03 | 1.02  | 0.7036 | 1.08  | 0.1369 | 1.14  | 0.0286 | 1.1   | 0.4586 |
| 96609_at   | 1452371_at   | Sfrs11        | splicing factor, arginine/serine-rich 11      | -1.04 | 0.71 | 1.23  | 0.0298 | 1.33  | 0.128  | 1.42  | 0.0016 | 1.62  | 0.0025 |
| 96610_at   | 1415826_at   | Atp6v1h       | ATPase, H+ transporting, lysosomal 50/57kI    | -1.02 | 0.91 | 1.02  | 0.6646 | 1.03  | 0.5488 | 1.03  | 0.2393 | 1.16  | 0.162  |
| 96611_at   | 1429708_at   | Ndufa11       | NADH dehydrogenase (ubiquinone) 1 alpha       | 1.87  | 0.13 | -1.03 | 0.6233 | 1.14  | 0.023  | 1.26  | 0.0119 | -1.07 | 0.7365 |
| 96613_at   | 1416634_at   | 5730536A07Rik | RIKEN cDNA 5730536A07 gene                    | 1.14  | 0.73 | -1.04 | 0.3949 | -1.02 | 0.6117 | -1.08 | 0.1052 | -1.26 | 0.0049 |
| 96614_at   | 1454606_at   | 4933426M11Rik | RIKEN cDNA 4933426M11 gene                    | 1.24  | 0.27 | 1.08  | 0.1639 | 1.18  | 0.0947 | 1.3   | 0.0017 | 1.06  | 0.6055 |
| 96615_at   | 1426624_a_at | Ypel3         | yippee-like 3 (Drosophila)                    | -1.17 | 0.21 | -1.12 | 0.1696 | 1.04  | 0.7772 | -1.14 | 0.0407 | 1.01  | 0.9472 |
| 96616_at   | 1448763_at   | Atad1         | ATPase family, AAA domain containing 1        | -1.15 | 0.38 | -1.11 | 0.0404 | -1.03 | 0.776  | -1.08 | 0.2166 | -1.03 | 0.7557 |
| 96617_at   | 1451676_at   | Drap1         | Dr1 associated protein 1 (negative cofactor)  | 1.39  | 0.03 | 1.16  | 0.08   | -1.05 | 0.6252 | 1.1   | 0.268  | 1.24  | 0.2595 |
| 96618_at   | 1449021_at   | Rpp21         | ribonuclease P 21 subunit (human)             | 1.26  | 0.13 | -1.1  | 0.0643 | -1.09 | 0.1227 | -1.1  | 0.0835 | -1.19 | 0.348  |
| 96619_at   | 1452177_at   | Abcf3         | ATP-binding cassette, sub-family F (GCN20     | 1.78  | 0.13 | -1.09 | 0.3264 | -1.19 | 0.1    | -1.32 | 0.0174 | -1.11 | 0.7716 |
| 96620_at   | 1417550_a_at | Gsg1          | germ cell-specific gene 1                     | 1.1   | 0.57 | -1    | 0.935  | 1.05  | 0.3262 | -1.03 | 0.6845 | 1.47  | 0.0582 |
| 96621_at   | 1452726_a_at | 1110061L23Rik | RIKEN cDNA 1110061L23 gene                    | 1.47  | 0.2  | 1.04  | 0.6995 | -1.05 | 0.6007 | 1.04  | 0.6134 | 1.04  | 0.7434 |
| 96623_at   | 1435133_at   | Ugcg          | UDP-glucose ceramide glucosyltransferase      | 1.18  | 0.58 | 1.19  | 0.1136 | 1.2   | 0.1978 | 1.2   | 0.1094 | 1.34  | 0.1319 |
| 96625_at   | 1435114_at   | Wdhd1         | WD repeat and HMG-box DNA binding prote       | -1.11 | 0.77 | -1.27 | 0.0536 | -1.26 | 0.0597 | -1.18 | 0.1869 | -1.08 | 0.6429 |
| 96626_at   | 1449672_s_at | Tufm          | Tu translation elongation factor, mitochondri | 1.63  | 0.13 | -1.08 | 0.2456 | -1.08 | 0.4686 | -1.1  | 0.3095 | -1.22 | 0.1087 |
| 96627_at   | 1416667_at   | Ebp           | phenylalkylamine Ca2+ antagonist (emopar      | 1.29  | 0.36 | -1.42 | 0      | -1.2  | 0.0167 | -1.72 | 0      | -1.68 | 0.0004 |
| 96628_at   | 1452157_at   | Eprs          | glutamyl-prolyl-tRNA synthetase               | -1.3  | 0.29 | -1.06 | 0.3921 | -1.04 | 0.6054 | 1.03  | 0.4413 | -1.17 | 0.2988 |
| 96629_at   | 1434216_a_at | D7Rp2e        | DNA segment, Chr 7, Roswell Park 2 compl      | 1.75  | 0.02 | 1.52  | 0.0001 | 1.16  | 0.0599 | 1.53  | 0      | 1.64  | 0.0024 |
| 96630_at   | 1415938_at   | Spink3        | serine protease inhibitor, Kazal type 3       | 12.28 | 0.01 | 2.43  | 0.1062 | 1.06  | 0.9116 | 2.95  | 0.0046 | 4.26  | 0.0161 |
| 96633_s_at | 1415778_at   | Morf4l2       | mortality factor 4 like 2                     | -1.35 | 0.47 | -1.15 | 0.1029 | -1.08 | 0.3826 | -1.15 | 0.1404 | -1.45 | 0.0078 |
| 96634_at   | 1452716_at   | 5730469M10Rik | RIKEN cDNA 5730469M10 gene                    | 1.69  | 0.09 | 1.53  | 0.0039 | 1.14  | 0.4056 | 1.67  | 0.0009 | 1.31  | 0.1891 |
| 96635_at   | 1426344_at   | Gle1l         | GLE1 RNA export mediator-like (yeast          | 2.04  | 0.15 | -1.01 | 0.813  | 1.13  | 0.1209 | -1.01 | 0.9369 | -1.5  | 0.0601 |
| 96636_at   | 1415748_a_at | Dctn5         | dynactin 5                                    | 1.26  | 0.29 | -1.03 | 0.5787 | -1.01 | 0.904  | 1.03  | 0.6156 | -1.06 | 0.7282 |
| 96637_at   | 1419447_s_at | ---           | ---                                           | -1.01 | 0.97 | 1.03  | 0.6736 | 1.08  | 0.2828 | 1.02  | 0.8395 | -1.3  | 0.497  |
| 96640_at   | 1448509_at   | 3110001A13Rik | RIKEN cDNA 3110001A13 gene                    | 1.42  | 0.09 | 1.16  | 0.0346 | 1.03  | 0.653  | 1.08  | 0.2948 | -1.11 | 0.336  |
| 96641_at   | 1433478_at   | Psarl         | presenilin associated, rhomboid-like          | 1.75  | 0.06 | 1.03  | 0.7554 | 1.19  | 0.0493 | 1.13  | 0.1827 | 1.11  | 0.2439 |
| 96643_at   | 1424351_at   | Wfdc2         | WAP four-disulfide core domain 2              | 1.53  | 0.09 | 1.04  | 0.8413 | -1.09 | 0.5272 | -1.73 | 0.0033 | -3.5  | 0.0645 |
| 96644_at   | 1450742_at   | Bysl          | bystin-like                                   | 1.37  | 0.49 | -1.77 | 0.0806 | -2.05 | 0.0379 | -1.73 | 0.0802 | 1.17  | 0.7341 |
| 96646_at   | 1460209_at   | Usp39         | ubiquitin specific protease 39                | 1.44  | 0.13 | -1.12 | 0.1767 | -1.01 | 0.8932 | -1.06 | 0.4556 | -1.62 | 0.0362 |
| 96647_at   | 1432271_a_at | 4833420K19Rik | RIKEN cDNA 4833420K19 gene                    | -1.28 | 0.42 | 1.09  | 0.2604 | 1.25  | 0.0532 | 1.14  | 0.2403 | -1.16 | 0.4225 |
| 96648_at   | 1455269_a_at | Coro1a        | coronin, actin binding protein 1A             | 1.13  | 0.71 | 2.15  | 0.007  | -1.29 | 0.3026 | 2.03  | 0.0621 | 1.43  | 0.201  |
| 96649_at   | 1452130_at   | 2310042M24Rik | RIKEN cDNA 2310042M24 gene                    | 1.93  | 0.14 | -1.01 | 0.8647 | -1.17 | 0.0045 | -1.06 | 0.3237 | -1.25 | 0.0146 |
| 96650_at   | 1420776_a_at | Auh           | AU RNA binding protein/enoyl-coenzyme A l     | 1.09  | 0.21 | 1.21  | 0.0062 | 1.24  | 0.0543 | 1.32  | 0.0001 | 1.16  | 0.2067 |
| 96651_at   | 1422676_at   | Smarge1       | SWI/SNF related, matrix associated, actin di  | 1.41  | 0.11 | 1.13  | 0.3223 | 1.34  | 0.0435 | 1.13  | 0.333  | -1    | 0.9892 |
| 96652_at   | 1456313_x_at | Mrpl28        | mitochondrial ribosomal protein L28           | 1.03  | 0.74 | -1.04 | 0.6124 | -1.04 | 0.3851 | -1.02 | 0.8087 | -1.11 | 0.0371 |
| 96653_at   | 1452734_at   | Rnaset2       | ribonuclease T2                               | 1.2   | 0.42 | 1.06  | 0.6626 | -1.16 | 0.0547 | 1.01  | 0.9521 | -1.09 | 0.078  |
| 96656_at   | 1426723_at   | Wdr48         | WD repeat domain 48                           | 2.05  | 0.03 | 1.01  | 0.8397 | 1.11  | 0.1564 | 1.07  | 0.177  | 1.46  | 0.0086 |
| 96657_at   | 1420502_at   | Sat1          | spermidine/spermine N1-acetyl transferase     | 1.25  | 0.44 | 1.38  | 0.0081 | 1.28  | 0.0646 | 1.61  | 0.0164 | 1.04  | 0.8525 |
| 96658_at   | 1433480_at   | 2900010J23Rik | RIKEN cDNA 2900010J23 gene                    | 1.73  | 0.02 | -1.09 | 0.1147 | -1.35 | 0.0141 | -1.18 | 0.0309 | -1.15 | 0.4758 |
| 96661_at   | 1424391_at   | Nrd1          | nardilysin, N-arginine dibasic convertase, NF | 1.99  | 0.24 | 1.19  | 0.0009 | 1.23  | 0.0001 | 1.29  | 0.0003 | 1.03  | 0.776  |
| 96662_at   | 1429514_at   | Ppap2b        | phosphatidic acid phosphatase type 2B         | 1.01  | 0.97 | -1.02 | 0.7829 | 1.18  | 0.1893 | -1.16 | 0.1118 | -1.13 | 0.239  |
| 96663_at   | 1416864_at   | Surf6         | surfeit gene 6                                | 2.47  | 0.26 | 1.25  | 0.1322 | 1.44  | 0.0151 | 1.36  | 0.0403 | -2.17 | 0.0664 |
| 96665_at   | 1420495_a_at | Vps26         | vacuolar protein sorting 26 (yeast)           | -1.09 | 0.7  | 1.08  | 0.7164 | 1.02  | 0.9058 | 1.08  | 0.6742 | 1.46  | 0.2645 |
| 96666_at   | 1423538_at   | Ntan1         | N-terminal Asn amidase                        | 2.45  | 0.01 | 1.13  | 0.3427 | -1.08 | 0.6453 | 1.1   | 0.3655 | 1.39  | 0.2321 |

|            |              |                 |                                                 |       |      |       |        |       |        |       |        |       |        |
|------------|--------------|-----------------|-------------------------------------------------|-------|------|-------|--------|-------|--------|-------|--------|-------|--------|
| 96667_at   | 1433666_s_at | Vps41           | vacuolar protein sorting 41 (yeast)             | -1.04 | 0.86 | 1.13  | 0.0713 | 1.09  | 0.2095 | 1.17  | 0.0111 | -1.27 | 0.072  |
| 96668_at   | 1460685_at   | Timm17b         | translocator of inner mitochondrial membran     | -1.12 | 0.5  | -1.07 | 0.4195 | -1.08 | 0.3679 | -1.07 | 0.4488 | 1.02  | 0.7581 |
| 96669_at   | 1423838_s_at | 2400003C14Rik   | RIKEN cDNA 2400003C14 gene                      | 1.61  | 0.02 | 1.14  | 0.0132 | 1.16  | 0.205  | 1.3   | 0.0003 | -1.31 | 0.1789 |
| 96670_at   | 1452823_at   | Gstk1           | glutathione S-transferase kappa 1               | 1.53  | 0.02 | -1.01 | 0.9397 | -1.16 | 0.1502 | -1.07 | 0.5951 | -1.19 | 0.2054 |
| 96672_at   | 1428662_a_at | MGI:1916782     | homeobox only domain                            | -1.58 | 0.08 | -1.25 | 0.2448 | -2.04 | 0.0315 | -1.06 | 0.8135 | -1.68 | 0.0279 |
| 96674_at   | 1419950_s_at | Tnpo3           | transportin 3                                   | 1.53  | 0.46 | 1.15  | 0.3184 | 1     | 0.994  | 1.01  | 0.9532 | 1.68  | 0.0329 |
| 96675_at   | 1435811_a_at | Unc50           | unc-50 homolog (C. elegans)                     | 1.17  | 0.4  | 1.09  | 0.0697 | 1.18  | 0.0027 | 1.18  | 0.017  | -1.12 | 0.3315 |
| 96676_at   | 1454640_at   | Chchd7          | coiled-coil-helix-coiled-coil-helix domain con  | 1.24  | 0.51 | 1.08  | 0.3508 | 1.2   | 0.0469 | 1.22  | 0.0682 | 1.07  | 0.7268 |
| 96677_at   | 1460687_at   | 2410195B05Rik   | RIKEN cDNA 2410195B05 gene                      | 1.18  | 0.49 | 1.1   | 0.3641 | 1.03  | 0.8034 | 1.16  | 0.2663 | 1.89  | 0      |
| 96678_at   | 1451559_a_at | Dhrs4           | dehydrogenase/reductase (SDR family) mer        | 1.53  | 0.05 | 1.14  | 0.1355 | 1.15  | 0.0614 | 1.25  | 0.0349 | -1.03 | 0.8259 |
| 96680_at   | 1417191_at   | Dnajb9          | DnaJ (Hsp40) homolog, subfamily B, membe        | 1.6   | 0.3  | 1.95  | 0.0038 | 1.97  | 0.0026 | 1.89  | 0.0005 | 1.01  | 0.9589 |
| 96682_at   | 1418075_at   | St6galnac4      | ST6 (alpha-N-acetyl-neuraminyl-2,3-beta-ga      | -1.13 | 0.61 | -1.04 | 0.8815 | -1.2  | 0.4804 | 1.12  | 0.7718 | -1.43 | 0.5607 |
| 96684_at   | 1433457_s_at | Grsf1           | G-rich RNA sequence binding factor 1            | 1.04  | 0.84 | 1.32  | 0.0026 | 1.15  | 0.0961 | 1.43  | 0.0002 | 1.26  | 0.0228 |
| 96687_f_at | 1420642_a_at | 2010100O12Rik   | RIKEN cDNA 2010100O12 gene                      | 1.68  | 0.03 | 1.2   | 0.0073 | 1.03  | 0.7103 | 1.21  | 0.0001 | -1.34 | 0.1163 |
| 96691_at   | 1451995_at   | Taf11           | TAF11 RNA polymerase II, TATA box bindin        | -1.21 | 0    | 1.06  | 0.4331 | 1.17  | 0.077  | -1.01 | 0.9197 | -1.34 | 0.1671 |
| 96692_at   | 1423591_at   | Fgfr1op2        | FGFR1 oncogene partner 2                        | -1.67 | 0.01 | -1.14 | 0.2984 | 1.02  | 0.8947 | 1.03  | 0.7874 | 1.44  | 0.0619 |
| 96693_at   | 1416312_at   | Rars            | arginyl-tRNA synthetase                         | 1.32  | 0.3  | 1.05  | 0.3674 | 1.04  | 0.4649 | 1.09  | 0.1071 | -1.1  | 0.5224 |
| 96695_at   | 1417609_at   | Ube2a           | ubiquitin-conjugating enzyme E2A, RAD6 hc       | -1.07 | 0.76 | -1.05 | 0.6465 | -1.08 | 0.6298 | -1.27 | 0.1203 | -1.91 | 0.0048 |
| 96696_at   | 1452787_a_at | Hrmt112         | heterogeneous nuclear ribonucleoproteins r      | 1.69  | 0.25 | 1.41  | 0.0029 | 1.05  | 0.7234 | 1.42  | 0.0017 | 1.37  | 0.0798 |
| 96698_at   | 1423234_at   | Psmd5           | proteasome (prosome, macropain) 26S subu        | -1.31 | 0.29 | -1.16 | 0.1659 | 1.24  | 0.1446 | 1.16  | 0.3422 | -1.23 | 0.308  |
| 96699_at   | 1422495_a_at | Hmgn1           | high mobility group nucleosomal binding dor     | 1.27  | 0.2  | -1.03 | 0.7351 | 1.06  | 0.5641 | -1.01 | 0.9542 | 1.3   | 0.0575 |
| 96700_r_at | 1455349_at   | Rap1b           | RAS related protein 1b                          | 1.2   | 0.44 | 1.01  | 0.9062 | 1.13  | 0.559  | 1.15  | 0.1669 | 1.24  | 0.1775 |
| 96701_at   | 1448283_a_at | Uble1b          | ubiquitin-like 1 (sentrin) activating enzyme E  | 1.58  | 0.03 | 1.29  | 0.0035 | 1.22  | 0.0814 | 1.23  | 0.0867 | -1.23 | 0.3013 |
| 96703_at   | 1450062_a_at | Maged1          | melanoma antigen, family D, 1                   | -1.15 | 0.14 | -1.11 | 0.0893 | 1.14  | 0.0966 | -1.06 | 0.3147 | -1.16 | 0.281  |
| 96704_at   | 1448612_at   | Sfn             | stratifin                                       | -1.45 | 0.6  | -1.07 | 0.7494 | -1.97 | 0.009  | 1.04  | 0.8469 | -1.47 | 0.3467 |
| 96707_at   | 1416370_at   | Zipr1           | zinc finger proliferation 1                     | 1.01  | 0.95 | 1.07  | 0.1896 | 1.2   | 0.0666 | 1.05  | 0.3431 | 1.25  | 0.0216 |
| 96708_at   | 1416108_a_at | Tmed3           | transmembrane emp24 domain containing 3         | 1.36  | 0.12 | -1.09 | 0.2888 | 1.09  | 0.1535 | 1     | 0.9745 | -1.12 | 0.3339 |
| 96709_at   | 1459890_s_at | 1110008P14Rik   | RIKEN cDNA 1110008P14 gene                      | -1.04 | 0.83 | -1.24 | 0.0019 | -1.1  | 0.2004 | -1.15 | 0.0301 | -2.48 | 0.0109 |
| 96710_at   | 1428029_a_at | H2afv           | H2A histone family, member V                    | 1.49  | 0.02 | 1.36  | 0.0026 | 1.32  | 0.0305 | 1.42  | 0      | 1.22  | 0.1792 |
| 96711_at   | 1422517_a_at | Znrd1           | zinc ribbon domain containing, 1                | -1    | 0.99 | 1.1   | 0.2563 | 1.03  | 0.7314 | 1.02  | 0.7306 | 1.12  | 0.4761 |
| 96712_at   | 1448321_at   | Smoc1           | SPARC related modular calcium binding 1         | 1.11  | 0.68 | 1.09  | 0.3922 | 1.2   | 0.0111 | 1.04  | 0.5738 | 1.48  | 0.1328 |
| 96713_at   | 1434510_at   | Papss2          | 3'-phosphoadenosine 5'-phosphosulfate syn       | 2.4   | 0.08 | -1.23 | 0.0103 | -1.29 | 0.0075 | -1.11 | 0.1878 | -1.1  | 0.5206 |
| 96716_at   | 1416768_at   | 1110003E01Rik   | RIKEN cDNA 1110003E01 gene                      | -1.18 | 0.41 | 1.12  | 0.0061 | 1.03  | 0.5721 | 1.19  | 0.0057 | -1    | 0.9941 |
| 96717_at   | 1423752_at   | Ddx47           | DEAD (Asp-Glu-Ala-Asp) box polypeptide 4;       | 1.32  | 0.19 | 1.02  | 0.8211 | 1.08  | 0.1238 | 1.04  | 0.542  | 1.1   | 0.7099 |
| 96718_at   | 1416914_s_at | Mtvr2 /// Ssca1 | mammary tumor virus receptor 2 /// Sjogren'     | -1.17 | 0.15 | 1.09  | 0.102  | 1.05  | 0.5317 | 1.22  | 0.0083 | 1.11  | 0.2451 |
| 96719_i_at | 1417653_at   | Pvalb           | parvalbumin                                     | -1.68 | 0.05 | 1.1   | 0.3511 | -1.13 | 0.1107 | -1.07 | 0.4617 | 1.49  | 0.0185 |
| 96724_r_at | 1448743_at   | Ssx2ip          | synovial sarcoma, X breakpoint 2 interacting    | 1.02  | 0.9  | -1.15 | 0.1364 | 1.07  | 0.4409 | -1.06 | 0.5135 | 1.07  | 0.5752 |
| 96725_at   | 1415746_at   | Cic             | capicua homolog (Drosophila)                    | -1.44 | 0.06 | 1.07  | 0.3427 | -1.08 | 0.1744 | -1.09 | 0.2703 | 1.12  | 0.1748 |
| 96726_at   | 1460389_at   | Cdk8            | cyclin-dependent kinase 8                       | 1.19  | 0.23 | 1.21  | 0.0001 | 1.19  | 0.0015 | 1.13  | 0.0013 | -1.01 | 0.9704 |
| 96728_at   | 1424786_s_at | Wdr45           | WD repeat domain 45                             | 1.24  | 0.11 | 1.05  | 0.5326 | 1.34  | 0.0003 | 1.15  | 0.1257 | 1     | 0.9941 |
| 96729_at   | 1455575_at   | Eif4ebp2        | eukaryotic translation initiation factor 4E bin | 1.04  | 0.92 | -1.05 | 0.774  | 1.04  | 0.8837 | -1.32 | 0.1868 | -1.88 | 0.2688 |
| 96730_at   | 1421893_a_at | Tpp2            | tripeptidyl peptidase II                        | -1.33 | 0.55 | 1.21  | 0.2827 | 1.26  | 0.1569 | 1.08  | 0.6729 | 1.22  | 0.6938 |
| 96731_at   | 1434697_at   | 1110001P04Rik   | RIKEN cDNA 1110001P04 gene                      | -1.14 | 0.58 | 1.12  | 0.2338 | -1.12 | 0.0543 | -1.02 | 0.703  | 1.44  | 0.0143 |
| 96732_at   | 1438669_at   | Wdr40a          | WD repeat domain 40A                            | 1.01  | 0.98 | 1.45  | 0.0053 | 1.41  | 0.0088 | 1.5   | 0.0003 | 1.05  | 0.4098 |
| 96733_at   | 1425266_a_at | Rap1gds1        | RAP1, GTP-GDP dissociation stimulator 1         | -1.06 | 0.75 | 1.01  | 0.8536 | 1.14  | 0.1139 | 1.01  | 0.8707 | 1.15  | 0.3473 |
| 96734_at   | 1417834_at   | Synj2bp         | synaptojanin 2 binding protein                  | -1.31 | 0.21 | -1.09 | 0.1571 | -1.01 | 0.8009 | -1.14 | 0.108  | -1.26 | 0.0006 |
| 96735_at   | 1448956_at   | Stard10         | START domain containing 10                      | 1.09  | 0.47 | 1.01  | 0.8608 | -1.11 | 0.4296 | -1.14 | 0.186  | 1.08  | 0.7041 |
| 96736_at   | 1454899_at   | Lpp             | LIM domain containing preferred translocati     | -1.67 | 0.14 | 1.06  | 0.2346 | 1.12  | 0.2574 | -1.03 | 0.6853 | 1.23  | 0.1411 |
| 96737_at   | 1451107_at   | Tbc1d22a        | TBC1 domain family, member 22a                  | 1.19  | 0.31 | -1.04 | 0.4885 | -1.02 | 0.8107 | -1.1  | 0.1454 | -1.15 | 0.6317 |
| 96738_at   | 1416094_at   | Adam9           | a disintegrin and metalloproteinase domain !    | -1.15 | 0.55 | -1.09 | 0.1908 | 1.08  | 0.4572 | -1.14 | 0.1972 | -1.7  | 0.0079 |
| 96739_at   | 1439028_at   | 1810045K17Rik   | RIKEN cDNA 1810045K17 gene                      | 1.25  | 0.49 | -1.13 | 0.3455 | -1.28 | 0.0281 | -1.24 | 0.1393 | -1    | 0.9862 |
| 96742_at   | 1418511_at   | Dpt             | dermatopontin                                   | 1.37  | 0.03 | -1.16 | 0.4724 | -1.37 | 0.3024 | -1.24 | 0.3839 | 1.17  | 0.7385 |
| 96743_at   | 1428554_a_at | 1810035L17Rik   | RIKEN cDNA 1810035L17 gene                      | 1.76  | 0.12 | -1.01 | 0.9254 | -1.03 | 0.7895 | 1.11  | 0.1255 | -1.13 | 0.6066 |

|            |              |               |                                                 |       |      |       |        |       |        |       |        |       |        |
|------------|--------------|---------------|-------------------------------------------------|-------|------|-------|--------|-------|--------|-------|--------|-------|--------|
| 96744_at   | 1448445_at   | Acp6          | acid phosphatase 6, lysophosphatidic            | 1.06  | 0.8  | 1.09  | 0.0755 | 1.07  | 0.1282 | -1.04 | 0.5179 | 1.14  | 0.2175 |
| 96746_at   | 1426265_x_at | Dlat          | dihydrolipoamide S-acetyltransferase (E2 cc     | 1.25  | 0.07 | 1.16  | 0.0407 | 1.38  | 0.0156 | 1.17  | 0.1436 | 1.01  | 0.9584 |
| 96747_at   | 1449027_at   | Rhou          | ras homolog gene family, member U               | 1.19  | 0.53 | -1.01 | 0.7991 | 1.02  | 0.7066 | -1.19 | 0.0118 | -1.68 | 0.0401 |
| 96749_f_at | 1433579_at   | Tmem30b       | transmembrane protein 30B                       | 1.03  | 0.93 | 1.15  | 0.3603 | 1.14  | 0.3842 | 1.37  | 0.086  | 1.47  | 0.0325 |
| 96751_at   | 1433951_at   | Arl5          | ADP-ribosylation factor-like 5                  | -1.19 | 0.17 | -1.04 | 0.5591 | -1.05 | 0.5428 | -1.23 | 0      | -1.09 | 0.3176 |
| 96752_at   | 1424067_at   | Icam1         | intercellular adhesion molecule                 | 1.98  | 0.04 | 2.71  | 0.1008 | 1.26  | 0.0389 | 4.04  | 0.046  | 1.79  | 0.0065 |
| 96753_at   | 1449523_at   | Bcl7c         | B-cell CLL/lymphoma 7C                          | 1.3   | 0.57 | 1     | 0.9908 | -1.13 | 0.203  | -1.05 | 0.5893 | 1.04  | 0.9252 |
| 96755_at   | 1424013_at   | Etf1          | eukaryotic translation termination factor 1     | 1.66  | 0.1  | 1.38  | 0.0035 | 1.31  | 0.005  | 1.44  | 0      | 1.73  | 0.0018 |
| 96756_at   | 1435333_at   | ---           | ---                                             | 2.32  | 0.06 | -1.03 | 0.824  | 1.26  | 0.0059 | 1.05  | 0.6274 | 1.02  | 0.9175 |
| 96757_at   | 1449000_at   | D10Jhu81e     | DNA segment, Chr 10, Johns Hopkins Univ         | 1.64  | 0.04 | 1.08  | 0.2468 | -1.07 | 0.2676 | 1.02  | 0.743  | 1.01  | 0.9307 |
| 96759_r_at | 1424530_at   | Sec14l2       | SEC14-like 2 (S. cerevisiae)                    | 1.08  | 0.73 | -1.15 | 0.3164 | -1.13 | 0.3007 | -1.33 | 0.0537 | -1.38 | 0.0144 |
| 96760_at   | 1449886_a_at | Timm10        | translocase of inner mitochondrial membran      | 1.66  | 0.1  | 1.3   | 0.013  | 1.35  | 0.0013 | 1.6   | 0.0022 | 1.16  | 0.4636 |
| 96761_at   | 1416596_at   | 2210409B01Rik | RIKEN cDNA 2210409B01 gene                      | -1.68 | 0.01 | -1.05 | 0.504  | -1.1  | 0.1918 | -1.05 | 0.4591 | 1.01  | 0.9515 |
| 96762_at   | 1433585_at   | Tnpo1         | Transportin 1                                   | -1.67 | 0.09 | 1.1   | 0.3603 | 1.06  | 0.5165 | 1     | 0.9986 | 1.19  | 0.2906 |
| 96763_at   | 1448426_at   | Sardh         | Sarcosine dehydrogenase                         | 2.33  | 0.03 | 1.13  | 0.0906 | -1.44 | 0.0013 | 1.07  | 0.3328 | -1.18 | 0.3152 |
| 96764_at   | 1419043_a_at | ligp1         | interferon inducible GTPase 1                   | -3.93 | 0.04 | -1.01 | 0.9804 | -1.8  | 0.0021 | 1.03  | 0.9285 | -2.87 | 0.0267 |
| 96765_at   | 1433924_at   | Peg3          | Paternally expressed 3                          | 1.31  | 0.06 | 1.03  | 0.8384 | 1.53  | 0.0063 | -1.13 | 0.4457 | 2.33  | 0.0281 |
| 96766_s_at | 1425248_a_at | Tyro3         | TYRO3 protein tyrosine kinase 3                 | 1.45  | 0.1  | 1.04  | 0.802  | 1.07  | 0.7471 | -1.09 | 0.6207 | 1.31  | 0.1554 |
| 96767_at   | 1451099_at   | Mbc2          | membrane bound C2 domain containing pro         | -1.28 | 0.02 | 1.17  | 0.0194 | 1.03  | 0.5609 | 1.31  | 0.0038 | -1.44 | 0.1755 |
| 96768_at   | 1417226_at   | Fbxw4         | F-box and WD-40 domain protein 4                | -1.53 | 0.07 | 1.09  | 0.3713 | 1.03  | 0.5985 | -1.07 | 0.3559 | 1.14  | 0.1023 |
| 96770_at   | 1450936_a_at | Dnase1l2      | deoxyribonuclease 1-like 2                      | 2.44  | 0.12 | -1.21 | 0.3367 | 1.06  | 0.8102 | -1.35 | 0.1888 | -1.62 | 0.567  |
| 96771_at   | 1434606_at   | Erbp3         | V-erb-b2 erythroblastic leukemia viral oncog    | -1.03 | 0.91 | 1.05  | 0.5316 | 1.09  | 0.2946 | 1.09  | 0.2682 | -1.03 | 0.9087 |
| 96772_at   | 1449061_a_at | Prim1         | DNA primase, p49 subunit                        | 1.94  | 0.26 | 1.32  | 0.4043 | 1.18  | 0.5852 | 1.51  | 0.1773 | 1.78  | 0.0601 |
| 96773_at   | 1423247_at   | Txndc4        | thioredoxin domain containing 4 (endoplasm      | 1.05  | 0.84 | -1.02 | 0.8232 | 1.05  | 0.6354 | -1.01 | 0.8461 | -1.2  | 0.078  |
| 96774_at   | 1434180_at   | Plekhc1       | pleckstrin homology domain containing, fam      | 1.09  | 0.69 | 1.05  | 0.5594 | -1.05 | 0.652  | -1.05 | 0.5928 | -1.33 | 0.0521 |
| 96777_at   | 1449138_at   | Sf3b1         | splicing factor 3b, subunit 1                   | 1.66  | 0.04 | 1.17  | 0.1475 | 1.22  | 0.113  | 1.36  | 0.0012 | 1.03  | 0.7379 |
| 96778_at   | 1416998_at   | Rrs1          | RRS1 ribosome biogenesis regulator homol        | -1.38 | 0.4  | 1.01  | 0.9196 | 1.39  | 0.0262 | -1.08 | 0.5853 | 1.02  | 0.8116 |
| 96779_f_at | 1420113_s_at | 2410022L05Rik | RIKEN cDNA 2410022L05 gene                      | 2.07  | 0.01 | -1.09 | 0.3693 | 1.14  | 0.1602 | -1.02 | 0.7762 | 1.3   | 0.0621 |
| 96780_at   | 1448971_at   | 2410022L05Rik | RIKEN cDNA 2410022L05 gene                      | 2.02  | 0.19 | 1.4   | 0.2311 | 1.41  | 0.2304 | 1.29  | 0.3157 | -1.01 | 0.9491 |
| 96781_at   | 1415725_at   | Rrn3          | RRN3 RNA polymerase I transcription factor      | 1.33  | 0.21 | 1.17  | 0.1196 | 1.33  | 0.0131 | 1.34  | 0.0095 | 1.44  | 0.1632 |
| 96782_at   | 1427290_at   | Krt2-19       | keratin complex 2, basic, gene 19               | -1.7  | 0.24 | -1.11 | 0.2988 | -1.17 | 0.1848 | -1.3  | 0.0548 | -1.3  | 0.1708 |
| 96783_at   | 1426014_a_at | Mucdhl        | mucin and cadherin like                         | -1.15 | 0.52 | -1.04 | 0.7237 | 1.07  | 0.6824 | 1.02  | 0.868  | -1.23 | 0.2389 |
| 96784_at   | 1433543_at   | Anln          | anillin, actin binding protein (scraps homoloç  | 2.54  | 0.14 | 1.04  | 0.8981 | 1.37  | 0.2403 | 1.25  | 0.4732 | 1.53  | 0.3662 |
| 96785_at   | 1448839_at   | D17Erd288e    | DNA segment, Chr 17, ERATO Doi 288, exp         | 1.36  | 0.22 | 1.02  | 0.8746 | 1.22  | 0.1381 | 1.14  | 0.3588 | 2.2   | 0.0463 |
| 96787_at   | 1424758_s_at | Serpina10     | serine (or cysteine) proteinase inhibitor, clac | -1.17 | 0.26 | -1.18 | 0.0159 | -1.26 | 0.0025 | -1.44 | 0.0001 | -1.35 | 0.1795 |
| 96790_f_at | 1452583_s_at | Galm          | galactose mutarotase                            | 1.19  | 0.36 | 1.07  | 0.3062 | 1     | 0.9617 | 1.1   | 0.0858 | 1.16  | 0.0527 |
| 96791_at   | 1456603_at   | 1500005K14Rik | RIKEN cDNA 1500005K14 gene                      | -1.2  | 0.16 | 1.06  | 0.4901 | 1.11  | 0.1792 | 1.05  | 0.42   | 1.79  | 0.0004 |
| 96792_at   | 1455593_at   | Apob          | apolipoprotein B                                | 1.42  | 0.14 | 1.18  | 0.5005 | -2.41 | 0.0033 | -1.47 | 0.1274 | -1.06 | 0.8427 |
| 96794_at   | 1425030_at   | Zfp622        | zinc finger protein 622                         | 1.13  | 0.53 | -1.03 | 0.7356 | -1.01 | 0.8747 | 1.04  | 0.6631 | 1.24  | 0.28   |
| 96796_f_at | 1419622_at   | Ugt2b5        | UDP-glucuronosyltransferase 2 family, mem       | -1.47 | 0.11 | -1.14 | 0.0002 | 1.06  | 0.0611 | -1.17 | 0.0055 | -1.94 | 0.0001 |
| 96799_at   | 1417476_at   | Fbxw5         | F-box and WD-40 domain protein 5                | 1.41  | 0.03 | 1.06  | 0.5593 | -1.02 | 0.8429 | 1.16  | 0.1403 | -1.61 | 0.385  |
| 96801_at   | 1422184_a_at | Ak1           | adenylate kinase 1                              | -1.57 | 0.38 | -1.13 | 0.823  | -1.01 | 0.9905 | -1.33 | 0.6002 | 1.13  | 0.6008 |
| 96802_at   | 1416377_at   | Pdcd7         | programmed cell death protein 7                 | -1.07 | 0.72 | -1.06 | 0.6125 | -1.01 | 0.8967 | -1.06 | 0.6191 | 1.3   | 0.3008 |
| 96803_at   | 1420654_a_at | Gbe1          | glucan (1,4-alpha-), branching enzyme 1         | 2.02  | 0.1  | -1.01 | 0.8855 | 1.15  | 0.4385 | 1.11  | 0.4805 | -1.78 | 0.0013 |
| 96804_at   | 1424019_at   | Nol1          | nucleolar protein 1                             | -1.08 | 0.58 | 1.39  | 0.0066 | 1.38  | 0.0096 | 1.4   | 0.0012 | 1.07  | 0.7275 |
| 96806_at   | 1452836_at   | Lpin2         | lipin 2                                         | 1.95  | 0.01 | 1.24  | 0.0877 | 1.35  | 0.0198 | 1.8   | 0.0001 | 1.92  | 0.0239 |
| 96807_at   | 1416296_at   | ---           | ---                                             | 1.99  | 0.18 | 1     | 0.9956 | -1.32 | 0.1686 | 1.21  | 0.1742 | -1.42 | 0.4926 |
| 96808_at   | 1423563_at   | ORF31         | open reading frame 31                           | -1.37 | 0.17 | -1.05 | 0.7994 | 1.08  | 0.7855 | 1.39  | 0.257  | 1.06  | 0.7034 |
| 96810_at   | 1454086_a_at | Lmo2          | LIM domain only 2                               | 2.2   | 0.12 | 1.5   | 0.0035 | -1.01 | 0.9376 | 1.45  | 0.0259 | 1.53  | 0.0336 |
| 96811_at   | 1416165_at   | 1700093E07Rik | RIKEN cDNA 1700093E07 gene                      | 2.96  | 0.02 | 1.29  | 0.3363 | 1.04  | 0.8689 | 1.49  | 0.0924 | 1.06  | 0.8935 |
| 96812_at   | 1427049_s_at | Smo           | smoothened homolog (Drosophila)                 | 1.38  | 0.57 | 1.05  | 0.6796 | -1.02 | 0.9088 | 1.02  | 0.8584 | 1.86  | 0.1921 |
| 96817_at   | 1457303_at   | 2700067D09Rik | RIKEN cDNA 2700067D09 gene                      | 1.5   | 0.31 | 1.26  | 0.1167 | 1.2   | 0.3514 | 1.22  | 0.2221 | 4.17  | 0      |
| 96818_at   | 1421720_a_at | Dtx2          | deltex 2 homolog (Drosophila)                   | 1     | 1    | 1.2   | 0.0838 | 1.18  | 0.3248 | 1.15  | 0.3257 | 1.07  | 0.8372 |



|            |              |               |                                                                   |       |      |       |        |       |        |       |        |       |        |
|------------|--------------|---------------|-------------------------------------------------------------------|-------|------|-------|--------|-------|--------|-------|--------|-------|--------|
| 96819_at   | 1428241_at   | 2310035K24Rik | RIKEN cDNA 2310035K24 gene                                        | 1.51  | 0.52 | -1.06 | 0.4895 | -1.04 | 0.6701 | -1.14 | 0.1962 | -1.19 | 0.4714 |
| 96822_at   | 1433886_at   | Elf2b5        | eukaryotic translation initiation factor 2B, subunit 5            | 1.74  | 0.11 | 1.03  | 0.7449 | 1.07  | 0.4796 | 1.14  | 0.1526 | -1.02 | 0.9199 |
| 96824_at   | 1452017_at   | Sox15         | SRY-box containing gene 15                                        | -1.61 | 0.15 | -1.12 | 0.4605 | 1.08  | 0.5576 | 1.01  | 0.9509 | 1.47  | 0.0779 |
| 96825_at   | 1452264_at   | Tenc1         | tensin like C1 domain-containing phosphatase 1                    | 2.48  | 0.05 | 1.54  | 0.0008 | 1.21  | 0.2569 | 1.53  | 0.005  | 1.46  | 0.1035 |
| 96827_at   | 1452830_s_at | Cad           | carbamoyl-phosphate synthetase 2, aspartate                       | 1.58  | 0.46 | 1.17  | 0.2725 | 1.35  | 0.275  | 1.68  | 0.0625 | 1.36  | 0.0512 |
| 96828_at   | 1417422_at   | Gnmt          | glycine N-methyltransferase                                       | -1.06 | 0.67 | 1.07  | 0.1366 | -1.13 | 0.0041 | -1.01 | 0.7635 | 1.19  | 0.1611 |
| 96829_at   | 1433717_at   | D19Wsu162e    | DNA segment, Chr 19, Wayne State University                       | 1.3   | 0.34 | 1.02  | 0.8149 | 1.07  | 0.5536 | -1.03 | 0.506  | -1.05 | 0.5255 |
| 96831_at   | 1424650_at   | Pdia5         | protein disulfide isomerase-associated 5                          | 1.06  | 0.74 | -1.05 | 0.5368 | 1.09  | 0.4334 | -1.05 | 0.5847 | 1.11  | 0.3508 |
| 96832_at   | 1424424_at   | Slc39a1       | solute carrier family 39 (zinc transporter), member 1             | 1.39  | 0.56 | -1    | 0.9754 | 1.06  | 0.633  | -1.02 | 0.856  | 1.05  | 0.8309 |
| 96833_at   | 1447924_at   | 8430423A01Rik | RIKEN cDNA 8430423A01 gene                                        | 1.38  | 0.36 | -1.08 | 0.3544 | -1.04 | 0.6902 | -1.12 | 0.143  | -1.02 | 0.9637 |
| 96834_at   | 1417727_at   | Sfrs9         | splicing factor, arginine/serine rich 9                           | -1.05 | 0.88 | 1.07  | 0.0553 | 1.11  | 0.0093 | 1.12  | 0.0366 | -1.24 | 0.139  |
| 96835_at   | 1418464_at   | Matn4         | matrilin 4                                                        | 1.48  | 0.6  | -1.16 | 0.3594 | -1.76 | 0.0178 | -1.28 | 0.0923 | -1.21 | 0.5409 |
| 96836_r_at | 1437585_x_at | Zfp161        | zinc finger protein 161                                           | 3.1   | 0.04 | 1.47  | 0.0517 | 1.41  | 0.2418 | 1.81  | 0.0003 | -1.02 | 0.9743 |
| 96837_at   | 1427109_at   | ORF61         | open reading frame 61                                             | -1.42 | 0.04 | -1.03 | 0.6423 | -1.04 | 0.6923 | -1.14 | 0.0375 | 1.08  | 0.5104 |
| 96838_at   | 1418779_at   | Rce1          | Ras and a-factor-converting enzyme 1 homolog                      | -1.51 | 0.2  | -1.39 | 0.0257 | -1.22 | 0.1234 | -1.57 | 0.0065 | 1.62  | 0.0318 |
| 96840_at   | 1423187_at   | Gabarapl2     | gamma-aminobutyric acid (GABA-A) receptor-associated protein 2    | 1.03  | 0.87 | -1.05 | 0.5407 | 1.02  | 0.7116 | -1.1  | 0.2088 | -1.34 | 0.0011 |
| 96841_at   | 1451069_at   | Pim3          | proviral integration site 3                                       | 1.23  | 0.35 | -1.04 | 0.5796 | -1.05 | 0.7575 | 1.06  | 0.6313 | 1.38  | 0.6179 |
| 96845_at   | 1426668_at   | Slc30a9       | solute carrier family 30 (zinc transporter), member 9             | 1.35  | 0.42 | 1.4   | 0.0127 | 1.28  | 0.1142 | 1.53  | 0.0017 | -1.28 | 0.1167 |
| 96846_at   | 1417909_at   | Serpinc1      | serine (or cysteine) proteinase inhibitor, clade 1, member 1      | -1.05 | 0.49 | -1.07 | 0.019  | -1.07 | 0.1969 | -1.2  | 0      | -1.12 | 0.1908 |
| 96847_at   | 1448447_at   | Vps28         | vacuolar protein sorting 28 (yeast)                               | 1.54  | 0.04 | 1     | 0.9144 | 1.07  | 0.2928 | 1.08  | 0.3094 | 1.06  | 0.3877 |
| 96849_at   | 1416345_at   | Timm8a        | translocase of inner mitochondrial membrane 8                     | 1.93  | 0.08 | 1.27  | 0.0078 | 1.34  | 0.0391 | 1.52  | 0.0008 | 1.39  | 0.161  |
| 96852_at   | 1452032_at   | Prkar1a       | protein kinase, cAMP dependent regulatory, type 1A                | -1.08 | 0.7  | 1.19  | 0.0004 | 1.01  | 0.9394 | 1.08  | 0.0305 | 1.23  | 0.0939 |
| 96854_at   | 1415706_at   | Copa          | coatamer protein complex subunit alpha                            | -1.16 | 0.38 | -1.06 | 0.4289 | 1.08  | 0.1852 | 1.05  | 0.3666 | -1.04 | 0.7014 |
| 96855_at   | 1423215_at   | Spcs2         | signal peptidase complex subunit 2 homolog                        | -1.12 | 0.54 | -1.2  | 0.0123 | -1.28 | 0      | -1.24 | 0.0002 | -1.19 | 0.0214 |
| 96856_at   | 1455821_x_at | C1qbp         | complement component 1, q subcomponent                            | -1.11 | 0.6  | -1.22 | 0.3497 | 1.02  | 0.8929 | 1.09  | 0.6939 | 2.31  | 0.2068 |
| 96858_at   | 1418127_a_at | Pdcd8         | programmed cell death 8                                           | -1.08 | 0.57 | 1.04  | 0.5334 | 1.12  | 0.3364 | 1.1   | 0.2444 | -1.39 | 0.0368 |
| 96859_at   | 1423102_a_at | Rnf10         | ring finger protein 10                                            | 1.34  | 0.46 | -1.13 | 0.0939 | -1.08 | 0.564  | -1.18 | 0.0015 | 1.28  | 0.321  |
| 96861_at   | 1424164_at   | Mrpl50        | mitochondrial ribosomal protein L50                               | 1.26  | 0.28 | 1.37  | 0.0051 | 1.4   | 0.0412 | 1.42  | 0.0206 | 1.16  | 0.1842 |
| 96862_at   | 1448388_a_at | 1110002B05Rik | RIKEN cDNA 1110002B05 gene                                        | 1.4   | 0.37 | 1.38  | 0.0001 | 1.24  | 0.0139 | 1.71  | 0      | 1.38  | 0.0207 |
| 96864_at   | 1433878_at   | Mrps26        | mitochondrial ribosomal protein S26                               | 1.49  | 0.08 | 1.21  | 0.0052 | 1.21  | 0.0649 | 1.24  | 0.0282 | 1.11  | 0.1369 |
| 96865_at   | 1415973_at   | Marcks        | Myristoylated alanine rich protein kinase C substrate 1           | 1.4   | 0.47 | 1.11  | 0.4625 | -1.04 | 0.7842 | 1.34  | 0.0735 | 1.58  | 0.0959 |
| 96866_at   | 1423122_at   | Avpi1         | arginine vasopressin-induced 1                                    | 2.96  | 0.18 | 1.21  | 0.605  | 1.59  | 0.1791 | 1.99  | 0.0348 | -2.09 | 0.2403 |
| 96867_at   | 1417776_at   | Azgp1         | alpha-2-glycoprotein 1, zinc-binding                              | 1.05  | 0.62 | 1.15  | 0.1138 | 1.01  | 0.9261 | 1.25  | 0.0107 | -1.18 | 0.0736 |
| 96868_at   | 1428079_at   | Fgb           | fibrinogen, B beta polypeptide                                    | -1.27 | 0.2  | 1.22  | 0.0896 | 1.03  | 0.7735 | 1.26  | 0.0337 | -1.44 | 0.0445 |
| 96869_at   | 1416937_at   | Gabarap       | gamma-aminobutyric acid receptor-associated protein 1             | 1     | 0.98 | -1.04 | 0.3572 | -1.14 | 0.2099 | -1.12 | 0.0299 | -1.05 | 0.5345 |
| 96870_at   | 1451002_at   | Aco2          | aconitase 2, mitochondrial                                        | 1.37  | 0.03 | 1.11  | 0.0692 | 1.02  | 0.6052 | 1.14  | 0.1103 | 1.58  | 0.0045 |
| 96871_at   | 1448543_at   | 2310042G06Rik | RIKEN cDNA 2310042G06 gene                                        | -1    | 0.98 | -1.02 | 0.8667 | 1.24  | 0.0813 | 1.15  | 0.269  | -1.77 | 0.0217 |
| 96872_at   | 1451067_at   | Sgta          | small glutamine-rich tetratricopeptide repeat domain containing 1 | -1.01 | 0.95 | 1.04  | 0.4749 | -1.01 | 0.9111 | -1.01 | 0.8976 | 1.4   | 0.0184 |
| 96875_r_at | 1420174_s_at | Tax1bp1       | Tax1 (human T-cell leukemia virus type I) binding protein 1       | -1.04 | 0.81 | 1.08  | 0.7077 | -1.14 | 0.4706 | 1.17  | 0.3186 | 1.01  | 0.9751 |
| 96879_at   | 1451274_at   | Ogdh          | oxoglutarate dehydrogenase (lipoamide)                            | 1.39  | 0.13 | 1.21  | 0      | 1.2   | 0.0363 | 1.33  | 0.0002 | 1.62  | 0.0198 |
| 96881_at   | 1435863_at   | Commf6        | COMM domain containing 6                                          | 1.06  | 0.63 | -1.13 | 0.0439 | -1.01 | 0.915  | -1.14 | 0.0103 | -1.71 | 0.0036 |
| 96883_at   | 1417718_at   | Elf3s4        | eukaryotic translation initiation factor 3, subunit 4             | 1.02  | 0.91 | -1.04 | 0.7132 | -1    | 0.9711 | -1.03 | 0.8303 | 1.16  | 0.3035 |
| 96884_at   | 1415975_at   | Carhsp1       | calcium regulated heat stable protein 1                           | 1.11  | 0.63 | -1.11 | 0.057  | -1.14 | 0.0283 | -1.18 | 0.003  | -1.35 | 0.0264 |
| 96885_at   | 1424882_a_at | 2510015F01Rik | RIKEN cDNA 2510015F01 gene                                        | 2.02  | 0.18 | 1.17  | 0.2581 | 1.61  | 0.0007 | 1.3   | 0.1239 | 2.35  | 0.0501 |
| 96886_at   | 1450199_a_at | Stab1         | stabilin 1                                                        | 1.45  | 0.11 | 1.05  | 0.5369 | 1.19  | 0.0234 | 1.25  | 0.0174 | 1.94  | 0.0041 |
| 96887_at   | 1416057_at   | Np15          | nuclear protein 15.6                                              | 1.39  | 0.1  | 1.09  | 0.0678 | 1.08  | 0.0168 | 1.14  | 0.1371 | 1.1   | 0.3697 |
| 96888_at   | 1451035_a_at | Akr1a4        | aldo-keto reductase family 1, member A4 (aldose reductase)        | 1.15  | 0.47 | 1.14  | 0.0253 | 1.15  | 0.0069 | 1.14  | 0.0308 | -1.13 | 0.1851 |
| 96890_at   | 1460178_at   | 1300002A08Rik | RIKEN cDNA 1300002A08 gene                                        | 1.08  | 0.64 | 1.01  | 0.8325 | 1.22  | 0.1103 | -1.03 | 0.6017 | -3.21 | 0      |
| 96891_at   | 1417082_at   | Anp32b        | acidic nuclear phosphoprotein 32 family, member 2                 | 1.35  | 0.09 | 1.12  | 0.1843 | 1.05  | 0.6157 | 1.1   | 0.2158 | 1.04  | 0.7876 |
| 96892_at   | 1415695_at   | Psma1         | proteasome (prosome, macropain) subunit, type 1, alpha            | 1.52  | 0.08 | 1.27  | 0.0384 | 1.18  | 0.1726 | 1.27  | 0.0039 | -1.02 | 0.8633 |
| 96894_at   | 1448422_at   | Tmed4         | transmembrane emp24 protein transport domain containing 4         | 1.31  | 0.36 | 1.08  | 0.4401 | 1.27  | 0.0978 | 1.18  | 0.1244 | 1.04  | 0.8177 |
| 96895_at   | 1418190_at   | Pon1          | paraoxonase 1                                                     | 1.17  | 0.65 | -1.04 | 0.2721 | -1.08 | 0.0564 | -1.12 | 0.0683 | 1.23  | 0.0749 |
| 96896_at   | 1452587_at   | Actr2         | ARP2 actin-related protein 2 homolog (yeast)                      | 1.02  | 0.84 | 1.08  | 0.5571 | 1.15  | 0.1269 | 1.05  | 0.5712 | -1.67 | 0.0531 |

|            |              |               |                                                  |       |      |       |        |       |        |       |        |       |        |
|------------|--------------|---------------|--------------------------------------------------|-------|------|-------|--------|-------|--------|-------|--------|-------|--------|
| 96898_at   | 1433562_s_at | Atp5f1        | ATP synthase, H+ transporting, mitochondri       | -1.25 | 0.01 | -1.08 | 0.4653 | -1.09 | 0.4137 | -1.01 | 0.9267 | 1.01  | 0.9591 |
| 96899_at   | 1423737_at   | Ndufs3        | NADH dehydrogenase (ubiquinone) Fe-S pr          | 1.63  | 0.04 | 1.11  | 0.0181 | 1.12  | 0.0719 | 1.18  | 0.006  | -1.06 | 0.4765 |
| 96900_at   | 1436990_s_at | MGI:2143558   | Nur77 downstream gene 2                          | 1.09  | 0.6  | 1.12  | 0.0449 | 1.23  | 0.0001 | 1.21  | 0.0083 | 1.46  | 0.001  |
| 96902_at   | 1452721_a_at | 2900091E11Rik | RIKEN cDNA 2900091E11 gene                       | 1.44  | 0.05 | -1.06 | 0.5872 | -1.16 | 0.0971 | -1    | 0.9784 | -1.31 | 0.1139 |
| 96904_at   | 1453725_a_at | Mrps7         | mitochondrial ribosomal protein S7               | 1.59  | 0.25 | 1.03  | 0.7328 | 1.08  | 0.6346 | 1.05  | 0.5899 | -1.05 | 0.524  |
| 96907_at   | 1451896_a_at | Cherp         | calcium homeostasis endoplasmic reticulum        | 1.78  | 0.17 | 1.18  | 0.0562 | 1.16  | 0.0715 | 1.25  | 0.025  | 1.21  | 0.0825 |
| 96909_at   | 1428159_s_at | Ndubfab1      | NADH dehydrogenase (ubiquinone) 1, alpha         | 1.54  | 0.03 | -1.04 | 0.5384 | 1.16  | 0.2028 | 1.05  | 0.5413 | -1.07 | 0.6913 |
| 96910_at   | 1456190_a_at | BC031140      | cDNA sequence BC031140                           | -2.92 | 0.14 | -1.14 | 0.6947 | -1.39 | 0.2757 | -1.74 | 0.0917 | -1.92 | 0.118  |
| 96911_at   | 1450623_at   | Gnb2          | guanine nucleotide binding protein, beta 2       | 1.05  | 0.85 | 1.07  | 0.2237 | -1.04 | 0.7189 | 1.01  | 0.9132 | -1.06 | 0.8457 |
| 96912_s_at | 1448471_a_at | Ctla2a        | cytotoxic T lymphocyte-associated protein 2      | 1.99  | 0.02 | -1.03 | 0.7778 | 1.13  | 0.2071 | 1.21  | 0.4807 | 1.12  | 0.6601 |
| 96913_at   | 1426522_at   | Hadhb         | hydroxyacyl-Coenzyme A dehydrogenase/3-          | 1.36  | 0.11 | 1.06  | 0.3552 | 1.43  | 0      | 1.2   | 0.0417 | -1.03 | 0.7324 |
| 96915_f_at | 1452790_x_at | Ndufa3        | NADH dehydrogenase (ubiquinone) 1 alpha          | 1.25  | 0.14 | 1.06  | 0.2124 | -1.06 | 0.4154 | 1.02  | 0.7131 | -1.08 | 0.636  |
| 96916_at   | 1448190_at   | Mrpl33        | Mitochondrial ribosomal protein L33              | 1.42  | 0.06 | 1     | 0.9639 | -1.04 | 0.6165 | 1.05  | 0.4609 | -1.21 | 0.4848 |
| 96917_at   | 1420058_s_at | 2410166105Rik | RIKEN cDNA 2410166105 gene                       | 1.03  | 0.77 | 1.08  | 0.1732 | 1     | 0.882  | 1.06  | 0.2983 | -1.29 | 0.1665 |
| 96918_at   | 1448470_at   | Fbp1          | fructose biphosphatase 1                         | 1.01  | 0.93 | 1.04  | 0.4269 | -1.04 | 0.4176 | -1.04 | 0.558  | 1.03  | 0.7654 |
| 96919_at   | 1437732_x_at | Atp6v0c       | ATPase, H+ transporting, V0 subunit C            | -1.13 | 0.3  | 1.06  | 0.3414 | 1.12  | 0.1403 | 1.08  | 0.2311 | 1.06  | 0.6893 |
| 96920_at   | 1416749_at   | Prss11        | protease, serine, 11 (Igf binding)               | -1.39 | 0.34 | -1.23 | 0.1282 | -1.19 | 0.0934 | -1.28 | 0.043  | -1.4  | 0.12   |
| 96921_at   | 1448537_at   | Ttc1          | tetratricopeptide repeat domain 1                | 1.4   | 0.1  | 1.05  | 0.6478 | 1.17  | 0.1663 | 1.28  | 0.0102 | 2.23  | 0.1435 |
| 96924_at   | 1452189_at   | 9430077D24Rik | RIKEN cDNA 9430077D24 gene                       | 1.18  | 0.37 | 1.05  | 0.3722 | 1.13  | 0.1392 | 1.1   | 0.0667 | 1.36  | 0.1449 |
| 96925_at   | 1433495_at   | Glt25d1       | glycosyltransferase 25 domain containing 1       | 1.81  | 0.02 | -1.02 | 0.8233 | 1.02  | 0.7527 | 1.1   | 0.1043 | -1.24 | 0.0146 |
| 96926_at   | 1415935_at   | Smoc2         | SPARC related modular calcium binding 2          | 2.41  | 0.01 | 1.05  | 0.6176 | -1.01 | 0.9415 | 1.09  | 0.4256 | -1.12 | 0.6746 |
| 96930_at   | 1416012_at   | Ehd1          | EH-domain containing 1                           | 1.15  | 0.53 | -1.37 | 0.018  | -1.27 | 0.0509 | -1.26 | 0.0645 | -1.55 | 0.1387 |
| 96934_at   | 1434823_x_at | 1110002M09Rik | RIKEN cDNA 1110002M09 gene                       | 1.14  | 0.2  | 1.15  | 0.123  | 1.1   | 0.152  | 1.09  | 0.3308 | 1.04  | 0.8456 |
| 96935_at   | 1455477_s_at | Pdzk1ip1      | PDZK1 interacting protein 1                      | -1.57 | 0.2  | -1.14 | 0.3368 | -1.13 | 0.4401 | -1.35 | 0.0448 | -1    | 0.9875 |
| 96936_at   | 1415670_at   | Copg          | coatamer protein complex, subunit gamma          | -1.25 | 0.14 | -1.04 | 0.5677 | -1.06 | 0.209  | -1.03 | 0.5844 | -1.34 | 0.0161 |
| 96938_at   | 1416833_at   | Keg1          | kidney expressed gene 1                          | -8.74 | 0    | -3.01 | 0      | -1.44 | 0.0082 | -3.48 | 0      | -8.47 | 0.0004 |
| 96940_at   | 1448519_at   | Tead2         | TEA domain family member 2                       | -2.82 | 0.17 | 1.47  | 0.186  | 2.25  | 0.0084 | 1.17  | 0.6284 | 1.43  | 0.3394 |
| 96941_at   | 1424648_at   | Rabl4         | RAB, member of RAS oncogene family-like          | 1.27  | 0.15 | -1.16 | 0.0285 | -1.19 | 0.0173 | -1.23 | 0.0025 | -1.06 | 0.5352 |
| 96942_at   | 1423728_at   | Eif3s6ip      | eukaryotic translation initiation factor 3, subu | -1.04 | 0.84 | -1.16 | 0.0394 | -1.05 | 0.4789 | -1.06 | 0.3867 | -1.2  | 0.0723 |
| 96943_at   | 1415699_a_at | Gps1          | G protein pathway suppressor 1                   | 1.22  | 0.16 | -1.04 | 0.3166 | -1.01 | 0.827  | -1.07 | 0.2451 | -1.21 | 0.0086 |
| 96945_at   | 1420898_at   | Snap23        | synaptosomal-associated protein 23               | -1.73 | 0.07 | 1.62  | 0.012  | 1.33  | 0.0124 | 1.18  | 0.1375 | 1.59  | 0.161  |
| 96946_at   | 1423873_at   | Lsm1          | LSM1 homolog, U6 small nuclear RNA asso          | -1.06 | 0.79 | 1.09  | 0.1259 | 1.14  | 0.2888 | 1.23  | 0.003  | -1.65 | 0.0319 |
| 96947_at   | 1428181_at   | Etfb          | electron transferring flavoprotein, beta polyp   | 1.55  | 0.04 | 1.02  | 0.6083 | 1.17  | 0.0001 | 1.08  | 0.2195 | 1.01  | 0.9196 |
| 96948_at   | 1423664_at   | Qdpr          | quininoid dihydropteridine reductase             | 1.13  | 0.51 | -1.17 | 0.0273 | -1.14 | 0.0189 | -1.33 | 0.0031 | -1.36 | 0.011  |
| 96949_at   | 1415767_at   | Ythdf1        | YTH domain family 1                              | 1.33  | 0.26 | 1.09  | 0.1537 | 1.14  | 0.029  | 1.12  | 0.11   | -1.04 | 0.6488 |
| 96950_at   | 1449277_at   | Ccl19         | chemokine (C-C motif) ligand 19                  | -1.24 | 0.33 | 1.08  | 0.3848 | 1.19  | 0.0511 | 1.19  | 0.0439 | 1.18  | 0.1116 |
| 96951_at   | 1438993_a_at | Atp6v1d       | ATPase, H+ transporting, V1 subunit D            | 1.01  | 0.9  | 1.19  | 0.0068 | 1.15  | 0.1925 | 1.28  | 0.001  | -1.05 | 0.7769 |
| 96952_at   | 1416506_at   | PsmA6         | proteasome (prosome, macropain) subunit, i       | 1.37  | 0.25 | 1.27  | 0.0049 | 1.23  | 0.1902 | 1.45  | 0.0002 | 1.14  | 0.5021 |
| 96953_at   | 1418456_a_at | Cxcl14        | chemokine (C-X-C motif) ligand 14                | -2    | 0.41 | -1.37 | 0.2656 | -1.42 | 0.1156 | -2.09 | 0.0104 | 1.81  | 0.3193 |
| 96956_at   | 1416381_a_at | Prdx5         | peroxiredoxin 5                                  | 1.21  | 0.19 | -1.01 | 0.7966 | 1.01  | 0.922  | 1.09  | 0.2865 | -1.38 | 0.0439 |
| 96959_at   | 1422559_at   | Ube2n         | ubiquitin-conjugating enzyme E2N                 | 1.12  | 0.46 | 1.06  | 0.4124 | -1.01 | 0.8795 | 1.08  | 0.1544 | -1.09 | 0.296  |
| 96962_at   | 1416546_a_at | Rpl6          | ribosomal protein L6                             | 1.1   | 0.66 | 1.12  | 0.0006 | 1.17  | 0.0112 | 1.19  | 0.0012 | 1.26  | 0.0784 |
| 96968_at   | 1425322_at   | Ifnz          | interferon zeta                                  | -1.68 | 0.24 | -1.19 | 0.4243 | -1.03 | 0.8984 | -1.42 | 0.2663 | 1.05  | 0.7605 |
| 96978_at   | 1417336_a_at | Syt14         | synaptotagmin-like 4                             | 1.49  | 0.2  | -1.39 | 0.0156 | -1.1  | 0.4074 | -1.12 | 0.3589 | -1.43 | 0.2945 |
| 96979_at   | 1450347_at   | Syt10         | synaptotagmin 10                                 | -1.28 | 0.36 | 1.26  | 0.3073 | 1.21  | 0.3632 | 1.06  | 0.7841 | 1.36  | 0.4412 |
| 96982_g_at | 1422371_at   | Olfir1507     | olfactory receptor 1507                          | -1.41 | 0.14 | 1.03  | 0.6636 | 1.02  | 0.7873 | 1.09  | 0.3846 | 1.58  | 0.0161 |
| 96983_at   | 1450600_at   | Olfir1508     | olfactory receptor 1508                          | -1.07 | 0.62 | 1.27  | 0.3597 | 1.21  | 0.032  | -1    | 0.9922 | 1.27  | 0.0496 |
| 96984_at   | 1422384_at   | Olfir1509     | olfactory receptor 1509                          | -2.26 | 0.09 | -1.14 | 0.3555 | -1.18 | 0.1101 | -1.26 | 0.1178 | 1.07  | 0.755  |
| 96985_at   | 1422385_at   | Olfir1264     | olfactory receptor 1264                          | -1.09 | 0.83 | -1.57 | 0.0127 | -1.25 | 0.0631 | -1.14 | 0.3431 | 1.43  | 0.0074 |
| 96986_at   | 1450604_at   | Olfir140      | olfactory receptor 140                           | -1.12 | 0.1  | 1.32  | 0.0726 | 1.02  | 0.8886 | 1.07  | 0.7027 | 1.38  | 0.392  |
| 96987_at   | 1422149_at   | MLL7          | myeloid/lymphoid or mixed lineage-leukemia       | -1.41 | 0.08 | 1.07  | 0.3848 | 1.03  | 0.6403 | 1.03  | 0.7354 | 1.28  | 0.1268 |
| 96996_at   | 1450426_at   | Chrna6        | cholinergic receptor, nicotinic, alpha polypep   | 1.14  | 0.77 | -1.06 | 0.8054 | 1.19  | 0.3485 | 1.08  | 0.6843 | 1.38  | 0.1134 |
| 96997_at   | 1420451_at   | Accn5         | amiloride-sensitive cation channel 5, intestin   | -1.4  | 0.13 | -1.2  | 0.2735 | -1.16 | 0.4301 | 1.03  | 0.8801 | -1.39 | 0.1072 |

|            |              |               |                                                  |       |      |       |        |       |        |       |        |       |        |
|------------|--------------|---------------|--------------------------------------------------|-------|------|-------|--------|-------|--------|-------|--------|-------|--------|
| 96998_at   | 1427424_at   | Galnt6        | UDP-N-acetyl-alpha-D-galactosamine:polyp         | -1.11 | 0.73 | 1.19  | 0.5743 | -1.03 | 0.8601 | 1.08  | 0.8097 | 1.38  | 0.4056 |
| 96999_at   | 1422343_at   | Olfr155       | olfactory receptor 155                           | 1.25  | 0.71 | 1.04  | 0.9201 | 1.07  | 0.8485 | 1.13  | 0.6796 | 2.34  | 0.3007 |
| 97003_at   | 1450590_at   | Olfr159       | olfactory receptor 159                           | -2.73 | 0.18 | 1.21  | 0.4134 | 1.49  | 0.1788 | 1.28  | 0.371  | -1.52 | 0.3397 |
| 97004_at   | 1422373_at   | Olfr71        | olfactory receptor 71                            | -1.13 | 0.13 | 1.01  | 0.898  | -1.03 | 0.7077 | 1.09  | 0.2446 | -1.05 | 0.6741 |
| 97005_at   | 1422367_at   | Olfr70        | olfactory receptor 70                            | -1.19 | 0.17 | -1.09 | 0.4007 | -1.05 | 0.5552 | -1.76 | 0.0007 | -1.33 | 0.177  |
| 97007_at   | 1452516_at   | Smok2         | sperm motility kinase 2                          | -1.83 | 0.41 | 1.07  | 0.8725 | 1.29  | 0.5055 | 1.23  | 0.6343 | -1.5  | 0.2598 |
| 97053_at   | 1422294_at   | Xcr1          | chemokine (C motif) receptor 1                   | -1.75 | 0.05 | -1.15 | 0.1429 | -1.06 | 0.5149 | -1.29 | 0.0183 | 1.4   | 0.0711 |
| 97061_g_at | 1460590_s_at | Ywhaq         | tyrosine 3-monooxygenase/tryptophan 5-mo         | 1.2   | 0.35 | 1.1   | 0.1969 | 1.04  | 0.5834 | 1.14  | 0.1328 | -1.28 | 0.0171 |
| 97073_at   | 1451954_at   | ---           | ---                                              | -2.39 | 0.13 | 1.63  | 0.175  | -1.28 | 0.5031 | 1.26  | 0.6867 | 1.49  | 0.5036 |
| 97080_at   | 1443473_at   | C79562        | expressed sequence C79562                        | -1.44 | 0.53 | -1.02 | 0.8999 | 1.21  | 0.1166 | -1.06 | 0.5569 | 1.03  | 0.9042 |
| 97082_at   | 1418211_at   | p             | pink-eyed dilution                               | -1.5  | 0.41 | -1.48 | 0.2885 | -1.13 | 0.7629 | -1.6  | 0.1883 | -1.74 | 0.2035 |
| 97083_at   | 1441023_at   | Elf2s2        | eukaryotic translation initiation factor 2, subu | -3.05 | 0.26 | 1.33  | 0.3648 | -1.81 | 0.0321 | -1.5  | 0.1777 | 1.44  | 0.3524 |
| 97084_at   | 1457475_at   | C80993        | expressed sequence C80993                        | -4.14 | 0.05 | 1.04  | 0.8511 | 1.19  | 0.6378 | 1     | 0.9924 | 1.31  | 0.1628 |
| 97085_at   | 1457476_at   | D8Erd362e     | DNA segment, Chr 8, ERATO Doi 362, expr          | -1.72 | 0.26 | -1.4  | 0.3702 | -1.95 | 0.1131 | -1.61 | 0.1855 | 1.57  | 0.0555 |
| 97087_f_at | 1451616_at   | Psg-ps1       | pregnancy specific glycoprotein pseudogene       | -1.22 | 0.33 | -1.1  | 0.5987 | -1.19 | 0.3098 | 1.06  | 0.8124 | -3.02 | 0.1131 |
| 97088_at   | 1448072_at   | ---           | ---                                              | -1.28 | 0.47 | 1.05  | 0.6814 | -1.02 | 0.8513 | 1.01  | 0.9419 | -1.03 | 0.907  |
| 97089_at   | 1450154_at   | Folh1         | folate hydrolase                                 | -1.51 | 0.25 | 4.94  | 0.1876 | 1.09  | 0.4646 | 22.82 | 0.1514 | 1.03  | 0.8972 |
| 97091_at   | 1419508_at   | Ripk1         | receptor (TNFRSF)-interacting serine-threor      | -1.3  | 0.45 | 1.08  | 0.4052 | -1.26 | 0.1203 | 1.1   | 0.3154 | -1.18 | 0.7195 |
| 97092_at   | 1419629_at   | Mesp2         | mesoderm posterior 2                             | -2.07 | 0.35 | 1.19  | 0.0027 | 1.18  | 0.0011 | 1.15  | 0.0502 | 1.77  | 0.1994 |
| 97094_at   | 1425164_a_at | Phkg1         | phosphorylase kinase gamma 1                     | -1.15 | 0.71 | 1.6   | 0.1264 | 1.38  | 0.2174 | 1.51  | 0.1946 | 2.92  | 0.2571 |
| 97095_at   | 1438571_at   | Bub1          | Budding uninhibited by benzimidazoles 1 ho       | 1.48  | 0.5  | -1.15 | 0.2459 | 1.17  | 0.3524 | 1.06  | 0.6785 | 1.03  | 0.9207 |
| 97097_at   | 1436307_at   | Myo9a         | myosin IXa                                       | 1.71  | 0.02 | 1.23  | 0.2111 | 1.34  | 0.0262 | 1.16  | 0.3004 | 1     | 0.9658 |
| 97098_at   | 1428780_at   | 1300017K07Rik | RIKEN cDNA 1300017K07 gene                       | 1.45  | 0.14 | -1.18 | 0.1454 | 1.04  | 0.8322 | -1.09 | 0.4959 | 1.05  | 0.7115 |
| 97099_at   | 1419851_at   | ---           | ---                                              | 1.65  | 0.27 | 1.46  | 0.2038 | 1.67  | 0.3123 | 1.11  | 0.2319 | -1.06 | 0.8044 |
| 97100_at   | 1449536_at   | Kcnn1         | potassium intermediate/small conductance c       | -1    | 0.99 | -1.86 | 0.029  | -1.39 | 0.1914 | -1.38 | 0.227  | 1.05  | 0.8878 |
| 97101_at   | 1430661_at   | BC037527      | cDNA sequence BC037527                           | 2.18  | 0.12 | -1.35 | 0.1795 | -1.26 | 0.3359 | -2.05 | 0.0112 | 1.61  | 0.283  |
| 97104_g_at | 1416229_at   | Rfk           | riboflavin kinase                                | -1.11 | 0.75 | -1.98 | 0      | -1.46 | 0.0023 | -2.47 | 0      | -2.32 | 0.0434 |
| 97105_at   | 1437111_at   | C230027N18Rik | RIKEN cDNA C230027N18 gene                       | 1.37  | 0.17 | 1.08  | 0.2884 | 1.36  | 0.004  | 1.01  | 0.8685 | 1.37  | 0.1039 |
| 97106_at   | 1419208_at   | Map3k8        | mitogen activated protein kinase kinase          | 3.51  | 0.05 | 2.54  | 0.1693 | 2.78  | 0.065  | 2.87  | 0.0951 | 1.12  | 0.6116 |
| 97107_at   | 1455700_at   | 1700007D05Rik | RIKEN cDNA 1700007D05 gene                       | 1.66  | 0.1  | 1.24  | 0.0748 | -1.13 | 0.5612 | 1.17  | 0.1707 | 1.18  | 0.6407 |
| 97109_at   | 1426175_a_at | Mcpt7         | mast cell protease 7                             | -1.93 | 0.02 | -1.04 | 0.7945 | -1.07 | 0.6105 | -1.15 | 0.2909 | 1.26  | 0.3629 |
| 97113_at   | 1449235_at   | FasI          | Fas ligand (TNF superfamily, member 6)           | 1.12  | 0.76 | 1.08  | 0.5592 | 1.13  | 0.555  | -1.06 | 0.5373 | -1.16 | 0.7437 |
| 97114_at   | 1415687_a_at | Psap          | prosaposin                                       | 1.05  | 0.59 | 1.09  | 0.4701 | -1.26 | 0.0446 | -1.01 | 0.9668 | -1.11 | 0.3809 |
| 97115_at   | 1459931_a_at | 2810021G02Rik | RIKEN cDNA 2810021G02 gene                       | -1.14 | 0.77 | -1.05 | 0.6118 | -1.04 | 0.6794 | -1.18 | 0.1478 | 1.3   | 0.1294 |
| 97116_at   | 1424930_s_at | MGC27770      | hypothetical protein MGC27770                    | 1.01  | 0.95 | 1.12  | 0.1195 | -1.5  | 0.0014 | 1.15  | 0.183  | -1.31 | 0.251  |
| 97117_at   | 1419845_at   | Dlx1          | Distal-less homeobox 1                           | -1.59 | 0.04 | 1.48  | 0.1473 | 1.21  | 0.2841 | 1.03  | 0.8748 | 1.85  | 0.1123 |
| 97118_at   | 1436073_at   | A630007B06Rik | RIKEN cDNA A630007B06 gene                       | 1.38  | 0.2  | -1.42 | 0.1151 | -1.16 | 0.3231 | -1.53 | 0.0304 | 3.27  | 0.0021 |
| 97119_at   | 1447976_at   | AI596198      | expressed sequence AI596198                      | -3.58 | 0.12 | -1.07 | 0.7737 | 1.29  | 0.3156 | 1.27  | 0.4258 | 1.02  | 0.9844 |
| 97120_at   | 1457905_at   | D7Erd59e      | DNA segment, Chr 7, ERATO Doi 59, expre          | -1.3  | 0.74 | 1.42  | 0.2307 | 1.77  | 0.0079 | 1.15  | 0.5581 | -1.08 | 0.7736 |
| 97121_at   | 1427582_at   | Fgf6          | fibroblast growth factor 6                       | -1.27 | 0.26 | 1.06  | 0.5967 | -1.48 | 0.0541 | -1.05 | 0.7474 | 1.47  | 0.5513 |
| 97122_at   | 1427560_at   | Six5          | sine oculis-related homeobox 5 homolog (Dl       | -1.51 | 0.33 | -1.14 | 0.3291 | 1     | 0.9825 | -1.11 | 0.2796 | 1.26  | 0.1136 |
| 97123_at   | 1449854_at   | Nr0b2         | nuclear receptor subfamily 0, group B, mem1      | 1.35  | 0.62 | 1.17  | 0.18   | -1.15 | 0.3503 | 1.21  | 0.0779 | -1.04 | 0.8478 |
| 97124_at   | 1421534_at   | ---           | ---                                              | 4.15  | 0.21 | 1.13  | 0.2245 | 1     | 0.9766 | 1.17  | 0.1027 | 1.48  | 0.2827 |
| 97125_f_at | 1450534_x_at | LOC56628      | MHC (A.CA/J(H-2K-f) class I antigen              | -1.15 | 0.41 | 1.5   | 0.056  | -1.05 | 0.444  | 1.46  | 0.1314 | -1.37 | 0.0174 |
| 97126_at   | 1427427_at   | Ryr3          | ryanodine receptor 3                             | -1.28 | 0.63 | -1.29 | 0.3534 | -1.2  | 0.5744 | -1.33 | 0.2966 | -1.04 | 0.9137 |
| 97128_at   | 1421620_at   | Il5ra         | interleukin 5 receptor, alpha                    | -1.86 | 0.35 | -1.91 | 0.2314 | 1.23  | 0.7457 | -1.69 | 0.3112 | 1.18  | 0.3309 |
| 97130_at   | 1420651_at   | Ate1          | arginine-tRNA-protein transferase 1              | 2.95  | 0.13 | 1.04  | 0.8253 | -1.1  | 0.7521 | -1.2  | 0.3743 | -1.45 | 0.4002 |
| 97131_at   | 1431792_a_at | Stk11ip       | serine/threonine kinase 11 interacting protei    | 2.02  | 0.24 | -1.03 | 0.8123 | -1.38 | 0.0231 | -1.02 | 0.8396 | 1.18  | 0.6673 |
| 97134_at   | 1419782_at   | AA517864      | expressed sequence AA517864                      | -3.2  | 0.3  | -1.04 | 0.911  | -1.14 | 0.7663 | -1.41 | 0.4005 | 1.01  | 0.9911 |
| 97135_at   | 1443312_at   | ---           | ---                                              | 1.63  | 0.52 | -3.72 | 0.0021 | -2.87 | 0.0048 | -3.37 | 0.0028 | -1.53 | 0.4017 |
| 97137_at   | 1442941_at   | C77027        | expressed sequence C77027                        | -2.84 | 0.07 | 1.41  | 0.0809 | 1.34  | 0.2996 | 1.21  | 0.5376 | 1.64  | 0.3817 |
| 97138_at   | 1457147_at   | BC026657      | cDNA sequence BC026657                           | -1.44 | 0.26 | -1.1  | 0.3522 | -1.42 | 0.0151 | -1.3  | 0.0171 | 1.24  | 0.0158 |
| 97139_at   | 1443352_at   | C77614        | EST C77614                                       | -1.45 | 0.13 | -1.12 | 0.4825 | -1.1  | 0.2511 | -1.1  | 0.582  | 1.12  | 0.7002 |

|            |              |               |                                                  |       |      |       |        |       |        |       |        |       |        |
|------------|--------------|---------------|--------------------------------------------------|-------|------|-------|--------|-------|--------|-------|--------|-------|--------|
| 97140_at   | 1447984_at   | D1Ertd75e     | DNA segment, Chr 1, ERATO Doi 75, expe           | -1.07 | 0.85 | 1.03  | 0.9241 | -1.31 | 0.3529 | -1.32 | 0.3299 | 1.09  | 0.8519 |
| 97141_s_at | 1441147_at   | D3Ertd229e    | DNA segment, Chr 3, ERATO Doi 229, expr          | -3.09 | 0.21 | -1.08 | 0.8032 | 1.02  | 0.9234 | -1.1  | 0.692  | 1.11  | 0.7389 |
| 97142_at   | 1443589_at   | DXErtd242e    | DNA segment, Chr X, ERATO Doi 242, expr          | -1.69 | 0.37 | -1.37 | 0.3188 | -1.24 | 0.4691 | -1.35 | 0.2629 | 1.05  | 0.8838 |
| 97143_at   | 1448054_at   | ---           | ---                                              | -1.88 | 0.01 | -1.15 | 0.1241 | -1.07 | 0.4511 | -1.26 | 0.0283 | 1.04  | 0.7836 |
| 97144_at   | 1447981_at   | C78441        | expressed sequence C78441                        | 1.07  | 0.93 | 1.08  | 0.8231 | -1.11 | 0.7423 | 1.26  | 0.4528 | 1.15  | 0.5813 |
| 97146_g_at | 1441344_at   | Spfh1         | SPFH domain family, member 1                     | 1.1   | 0.85 | -1.04 | 0.8458 | 1.07  | 0.7724 | -1.04 | 0.8996 | -1.15 | 0.6325 |
| 97147_at   | 1441421_at   | C530030P08Rik | RIKEN cDNA C530030P08 gene                       | -2.47 | 0.01 | 1.01  | 0.9814 | 1.29  | 0.4861 | -1.43 | 0.3127 | -1.01 | 0.9806 |
| 97148_at   | 1456136_at   | ---           | ---                                              | 1.04  | 0.95 | 1.18  | 0.5697 | -1.16 | 0.5941 | 1.09  | 0.7589 | 1.41  | 0.304  |
| 97149_at   | 1418558_at   | Rax           | retina and anterior neural fold homeobox         | -1.41 | 0.52 | 1.25  | 0.5887 | 1.22  | 0.525  | -1.22 | 0.6215 | 1.55  | 0.1901 |
| 97150_at   | 1450245_at   | Slc10a2       | solute carrier family 10, member 2               | -2.43 | 0.27 | -2.24 | 0.0043 | -3.63 | 0.0002 | -2.33 | 0.0072 | -1.64 | 0.2465 |
| 97151_at   | 1422154_at   | Gpr27         | G protein-coupled receptor 27                    | -1.03 | 0.81 | 1.02  | 0.8497 | 1.01  | 0.9425 | -1.13 | 0.312  | 1.07  | 0.7716 |
| 97152_at   | 1421689_at   | Krtap8-2      | keratin associated protein 8-2                   | -1.08 | 0.8  | 1.12  | 0.4452 | 1.06  | 0.5905 | 1.1   | 0.3072 | 1.11  | 0.6232 |
| 97153_at   | 1422144_at   | Inhbe         | inhibin beta E                                   | -2.94 | 0.01 | -1.03 | 0.887  | 1.33  | 0.1842 | -1.44 | 0.0636 | -2.07 | 0.0338 |
| 97154_f_at | 1439065_x_at | ---           | Similar to RIKEN cDNA 6330416L07 gene            | -3    | 0.26 | 1.66  | 0.1492 | 1.41  | 0.1154 | 2.21  | 0.0746 | -1.22 | 0.7528 |
| 97156_at   | 1422409_at   | Hes3          | hairy and enhancer of split 3 (Drosophila)       | -1.8  | 0.01 | -1.06 | 0.8206 | 1.53  | 0.145  | 1.11  | 0.6701 | 1.75  | 0.0254 |
| 97157_at   | 1449998_at   | Nkx3-1        | NK-3 transcription factor, locus 1 (Drosophila)  | -1.49 | 0.39 | -1.31 | 0.3095 | -1.35 | 0.2711 | -1.21 | 0.4492 | 2.52  | 0.0255 |
| 97158_at   | 1435360_at   | BC030045      | cDNA sequence BC030045                           | -1.2  | 0.74 | -1.17 | 0.2621 | -1.11 | 0.4714 | -1.39 | 0.0179 | 1.26  | 0.6044 |
| 97159_at   | 1419241_a_at | Aire          | autoimmune regulator (autoimmune polyenc         | -2.21 | 0.13 | -1.13 | 0.1847 | -1.1  | 0.4021 | -1.12 | 0.2756 | -1.12 | 0.628  |
| 97160_at   | 1448392_at   | Sparc         | secreted acidic cysteine rich glycoprotein       | 1.33  | 0.2  | 1.03  | 0.7312 | 1.29  | 0.0942 | 1.16  | 0.2621 | 1.51  | 0.0491 |
| 97162_at   | 1419858_at   | ---           | Transcribed locus                                | 1.07  | 0.94 | 1.15  | 0.3865 | -1.07 | 0.6384 | 1.28  | 0.0776 | 1.98  | 0.2738 |
| 97163_g_at | 1437909_at   | D030022P06Rik | RIKEN cDNA D030022P06 gene                       | -1.32 | 0.15 | 1.05  | 0.2503 | 1.04  | 0.672  | 1.01  | 0.7903 | 1.13  | 0.4929 |
| 97165_r_at | 1458414_at   | D2Ertd93e     | DNA segment, Chr 2, ERATO Doi 93, expe           | -1.73 | 0.13 | 1.3   | 0.2052 | -1    | 0.9943 | 1.37  | 0.1508 | 1.28  | 0.5321 |
| 97166_at   | 1428476_a_at | Elac2         | elaC homolog 2 (E. coli)                         | 1.56  | 0.01 | -1.03 | 0.7452 | 1.03  | 0.6764 | -1.02 | 0.804  | -1.18 | 0.6912 |
| 97168_at   | 1421456_at   | P2ry1         | purinergic receptor P2Y, G-protein coupled       | -1.35 | 0.23 | 1.98  | 0.1564 | 1.53  | 0.3345 | 2.43  | 0.0001 | 1.51  | 0.19   |
| 97169_f_at | 1425427_at   | AF067061      | CDNA sequence AF067061                           | 1.08  | 0.82 | 1.16  | 0.3577 | -1.05 | 0.8516 | -1.34 | 0.2408 | 1.47  | 0.1309 |
| 97170_at   | 1443001_at   | C78344        | expressed sequence C78344                        | 1.2   | 0.68 | -1.62 | 0.1135 | 1.11  | 0.7163 | 1.78  | 0.037  | 1.78  | 0.4642 |
| 97172_s_at | 1420408_a_at | Abcc9         | ATP-binding cassette, sub-family C (CFTR/M       | 1.45  | 0.28 | -1.06 | 0.5921 | 1.02  | 0.898  | -1.04 | 0.7163 | 1.09  | 0.5315 |
| 97176_at   | 1420075_at   | Atp8b1        | ATPase, class I, type 8B, member 1               | -1.81 | 0.01 | 1.06  | 0.6477 | -1.02 | 0.7745 | -1.14 | 0.1422 | 1.13  | 0.0676 |
| 97177_at   | 1426101_at   | Klh2          | Kelch-like 2, Mayven (Drosophila)                | 1.26  | 0.73 | -1.59 | 0.0378 | -1.26 | 0.3079 | -1.58 | 0.0269 | 1.3   | 0.6555 |
| 97179_at   | 1460713_at   | BC048355      | CDNA sequence BC048355                           | -1.24 | 0    | -1.4  | 0.0004 | -1.2  | 0.0002 | -1.5  | 0      | -1.13 | 0.2958 |
| 97186_s_at | 1419777_at   | ---           | ---                                              | 1.31  | 0.28 | -1.55 | 0.0288 | -1.49 | 0.1111 | -1.39 | 0.1201 | -1.19 | 0.5115 |
| 97187_at   | 1447462_at   | D7Wsu130e     | DNA segment, Chr 7, Wayne State Universi         | -1.04 | 0.91 | -1.09 | 0.4176 | 1.08  | 0.492  | 1.26  | 0.0772 | 1.36  | 0.4997 |
| 97188_at   | 1457372_at   | AW121686      | expressed sequence AW121686                      | -1.75 | 0.29 | -1.21 | 0.3629 | 1.04  | 0.9021 | -1.55 | 0.0189 | 1.94  | 0.1532 |
| 97189_at   | 1448097_at   | Ube3c         | Ubiquitin protein ligase E3C                     | -1.2  | 0.75 | -1.13 | 0.7792 | -1.09 | 0.8514 | 1.1   | 0.855  | -1.15 | 0.8528 |
| 97190_f_at | 1459935_at   | AA517562      | EST AA517562                                     | 1.08  | 0.82 | 1.35  | 0.3053 | 1.48  | 0.1714 | -1.24 | 0.5545 | -1.01 | 0.9878 |
| 97191_at   | 1449599_at   | ---           | ---                                              | -1.12 | 0.8  | -1.12 | 0.6706 | -1.26 | 0.4246 | -1.03 | 0.8931 | 1.06  | 0.8435 |
| 97192_at   | 1419779_at   | ---           | ---                                              | -1.95 | 0.16 | -1.19 | 0.3999 | -1.1  | 0.6205 | -1.12 | 0.6304 | 1.67  | 0.2143 |
| 97194_at   | 1448075_at   | AA408251      | expressed sequence AA408251                      | -1.52 | 0.37 | -1.17 | 0.2891 | -1.06 | 0.6574 | -1.07 | 0.6306 | -1.28 | 0.2795 |
| 97195_at   | 1427510_at   | Gnai1         | guanine nucleotide binding protein, alpha inl    | -1.17 | 0.72 | 1.13  | 0.4859 | 1.09  | 0.5895 | 1.11  | 0.5642 | 2.37  | 0.0071 |
| 97196_at   | 1427727_x_at | Psg19         | pregnancy specific glycoprotein 19               | -1.17 | 0.83 | -1.01 | 0.9869 | 1.32  | 0.4438 | -1.16 | 0.6242 | 2.04  | 0.3535 |
| 97198_at   | 1421839_at   | Abca1         | ATP-binding cassette, sub-family A (ABC1),       | 1.45  | 0.58 | 1.12  | 0.3184 | -1.03 | 0.7936 | 1.01  | 0.9173 | -1.93 | 0.3029 |
| 97199_at   | 1433439_at   | Cpne1         | copine I                                         | -1.12 | 0.68 | 1.35  | 0.0066 | 1.28  | 0.2581 | 1.39  | 0.0004 | 1.66  | 0.0109 |
| 97200_f_at | 1451294_s_at | Snrpe         | small nuclear ribonucleoprotein E                | 1.52  | 0.11 | 1.15  | 0.0436 | 1.07  | 0.4455 | 1.17  | 0.0135 | -1.16 | 0.4813 |
| 97201_s_at | 1417285_a_at | Ndufa5        | NADH dehydrogenase (ubiquinone) 1 alpha          | 1.74  | 0.06 | 1.12  | 0.0059 | 1.15  | 0.1874 | 1.15  | 0.1324 | 1.17  | 0.1551 |
| 97203_at   | 1415922_s_at | Mlp           | MARCKS-like protein                              | -1.88 | 0.16 | 1.4   | 0.044  | 1.13  | 0.2824 | 1.57  | 0.1217 | 1.36  | 0.1258 |
| 97204_s_at | 1416910_at   | Dnajd1        | DnaJ (Hsp40) homolog, subfamily D, membe         | 1.39  | 0.12 | 1.03  | 0.6408 | 1.1   | 0.158  | -1.03 | 0.7228 | -1.1  | 0.4948 |
| 97205_at   | 1426395_s_at | Eif3s1        | eukaryotic translation initiation factor 3, subu | 1.31  | 0.05 | 1.07  | 0.2435 | 1.08  | 0.144  | 1.19  | 0.0326 | -1.19 | 0.3084 |
| 97206_at   | 1416627_at   | Spint1        | serine protease inhibitor, Kunitz type 1         | -2.59 | 0.36 | 1     | 0.9948 | 1.15  | 0.1248 | 1.09  | 0.141  | -1.51 | 0.3477 |
| 97207_f_at | 1448244_at   | Lypla1        | lysophospholipase 1                              | 1.1   | 0.39 | 1.08  | 0.6061 | 1.05  | 0.7567 | 1.11  | 0.4293 | -1.31 | 0.0205 |
| 97210_at   | 1460262_a_at | 1700037H04Rik | RIKEN cDNA 1700037H04 gene                       | -1.33 | 0.56 | 1.11  | 0.1889 | -1.05 | 0.5348 | -1.1  | 0.1815 | -1    | 0.9952 |
| 97211_at   | 1415780_a_at | Armcx2        | armadillo repeat containing, X-linked 2          | -1.09 | 0.62 | 1.3   | 0.124  | 1.22  | 0.2339 | 1.19  | 0.3129 | -1.03 | 0.9498 |
| 97213_at   | 1423583_at   | Fem1a         | feminization 1 homolog a (C. elegans)            | 1.07  | 0.66 | -1.07 | 0.8437 | 1.51  | 0.3384 | 1.05  | 0.9191 | -1.03 | 0.8748 |
| 97216_at   | 1417246_at   | Pzp           | pregnancy zone protein                           | -1.12 | 0.37 | -1.04 | 0.0796 | -1.01 | 0.7279 | -1.04 | 0.2518 | 1.07  | 0.182  |

|            |              |               |                                                |       |      |       |        |       |        |       |        |       |        |
|------------|--------------|---------------|------------------------------------------------|-------|------|-------|--------|-------|--------|-------|--------|-------|--------|
| 97217_at   | 1426830_a_at | Ahcyl1        | S-adenosylhomocysteine hydrolase-like 1        | 1.16  | 0.47 | -1.06 | 0.3324 | 1.04  | 0.5778 | -1.01 | 0.8663 | -1.2  | 0.1696 |
| 97220_at   | 1448307_at   | Dscr2         | Down syndrome critical region homolog 2 (h     | 1.58  | 0.06 | -1.03 | 0.6827 | 1.05  | 0.5369 | -1.03 | 0.6351 | -1.02 | 0.9011 |
| 97226_at   | 1455008_at   | 6530401C20Rik | RIKEN cDNA 6530401C20 gene                     | 1.54  | 0.01 | 1.47  | 0.0031 | 1.35  | 0.0023 | 1.59  | 0.0001 | 1.14  | 0.4519 |
| 97227_at   | 1421026_at   | Gna12         | guanine nucleotide binding protein, alpha 12   | 3.19  | 0    | 1.5   | 0.0078 | 1.13  | 0.5917 | 1.27  | 0.2239 | -1.11 | 0.8399 |
| 97228_at   | 1451421_a_at | MGI:1913299   | leucine zipper domain protein                  | 1.24  | 0.67 | 1.08  | 0.3247 | -1.2  | 0.0985 | 1.11  | 0.441  | -1.02 | 0.956  |
| 97237_at   | 1450735_at   | 1810003N24Rik | RIKEN cDNA 1810003N24 gene                     | 1.05  | 0.58 | 1.03  | 0.5838 | -1.02 | 0.8432 | -1.01 | 0.843  | -1.29 | 0.0369 |
| 97238_at   | 1417450_a_at | Tacc3         | transforming, acidic coiled-coil containing pr | 1.08  | 0.89 | -1.17 | 0.7507 | -1.25 | 0.536  | 1.21  | 0.6319 | -1.73 | 0.0158 |
| 97241_at   | 1436342_a_at | D19Erd721e    | DNA segment, Chr 19, ERATO Doi 721, exp        | 2.12  | 0.06 | -1.07 | 0.3274 | 1.08  | 0.5407 | -1.14 | 0.0292 | -1.15 | 0.4345 |
| 97242_at   | 1427878_at   | 0610010O12Rik | RIKEN cDNA 0610010O12 gene                     | -1.04 | 0.86 | 1.18  | 0.0223 | 1.15  | 0.0427 | 1.08  | 0.1223 | 1.14  | 0.4558 |
| 97243_at   | 1450982_at   | Slc9a3r1      | solute carrier family 9 (sodium/hydrogen exc   | 1.37  | 0.3  | -1.08 | 0.077  | -1.14 | 0.0002 | 1.07  | 0.0537 | -1.01 | 0.9172 |
| 97247_at   | 1425052_at   | 2610034N03Rik | Isochorismatase domain containing 1            | 1.94  | 0.23 | -1.02 | 0.8478 | 1.14  | 0.5115 | -1.04 | 0.844  | -1.29 | 0.3699 |
| 97248_at   | 1422432_at   | Dbi           | diazepam binding inhibitor                     | 1.06  | 0.5  | -1.29 | 0.0006 | -1.17 | 0.0643 | -1.45 | 0.0001 | -1.57 | 0.0558 |
| 97249_at   | 1417167_at   | Exosc5        | exosome component 5                            | 1.31  | 0.48 | -1.05 | 0.4732 | -1.02 | 0.8274 | 1.08  | 0.1184 | -1.04 | 0.7937 |
| 97250_at   | 1423211_at   | Nola3         | nucleolar protein family A, member 3           | -1.49 | 0.18 | 1.1   | 0.4033 | 1.06  | 0.5183 | 1.09  | 0.2813 | -1.1  | 0.5729 |
| 97252_at   | 1423823_at   | 2610012O22Rik | RIKEN cDNA 2610012O22 gene                     | 1.83  | 0.13 | -1.06 | 0.7499 | 1.13  | 0.5011 | 1.08  | 0.6548 | -1.19 | 0.4844 |
| 97253_at   | 1417106_at   | Tpd5l2l       | tumor protein D52-like 2                       | 1.59  | 0.24 | 1.12  | 0.1822 | 1.14  | 0.4151 | 1.21  | 0.0588 | -1.37 | 0.2406 |
| 97254_at   | 1418119_at   | Rbm8a         | RNA binding motif protein 8a                   | 1.36  | 0.13 | 1.21  | 0.0076 | 1.18  | 0.0428 | 1.18  | 0.023  | 1.26  | 0.0846 |
| 97255_at   | 1451154_a_at | Cugbp2        | CUG triplet repeat, RNA binding protein 2      | -1.06 | 0.85 | 1.57  | 0.0036 | 1.17  | 0.449  | 1.88  | 0.0019 | 1.12  | 0.5517 |
| 97257_at   | 1425141_at   | ---           | ---                                            | -1.58 | 0.07 | -1.08 | 0.4252 | -1.2  | 0.1419 | -1.11 | 0.4561 | -2.47 | 0      |
| 97259_at   | 1422608_at   | Arpp19        | cAMP-regulated phosphoprotein 19               | -1.06 | 0.6  | 1.13  | 0.3107 | 1.1   | 0.2999 | 1.11  | 0.2898 | 1.03  | 0.9178 |
| 97260_at   | 1450685_at   | Arpp19        | cAMP-regulated phosphoprotein 19               | -1.28 | 0.12 | -1.05 | 0.4292 | -1.04 | 0.7487 | -1.08 | 0.1294 | -1.62 | 0.1494 |
| 97261_at   | 1460179_at   | Dnaj1         | DnaJ (Hsp40) homolog, subfamily A, membe       | -1.02 | 0.92 | -1.32 | 0.0054 | -1.44 | 0.002  | -1.43 | 0.0016 | -1.68 | 0.002  |
| 97262_at   | 1415825_s_at | ---           | ---                                            | 1.07  | 0.51 | -1.03 | 0.5475 | -1.07 | 0.4082 | -1.03 | 0.457  | 1.09  | 0.5086 |
| 97264_r_at | 1418889_a_at | Csnk1d        | casein kinase 1, delta                         | 2.63  | 0.16 | -1.04 | 0.7476 | 1.03  | 0.8164 | -1.1  | 0.3808 | -1.21 | 0.3894 |
| 97267_at   | 1416912_at   | 6330407G11Rik | RIKEN cDNA 6330407G11 gene                     | -1.06 | 0.7  | -1.13 | 0.3754 | 1.12  | 0.349  | -1.21 | 0.1782 | -1.5  | 0.1678 |
| 97269_f_at | 1417059_at   | Krtcap2       | keratinocyte associated protein 2              | 1.05  | 0.79 | -1.01 | 0.9276 | 1.19  | 0.2805 | 1.01  | 0.9062 | -1.2  | 0.311  |
| 97270_at   | 1422466_at   | ---           | ---                                            | -2.77 | 0.21 | -1.24 | 0.3434 | -1.31 | 0.2611 | -1.23 | 0.3781 | 1.37  | 0.2108 |
| 97271_at   | 1428526_at   | 1500034E06Rik | RIKEN cDNA 1500034E06 gene                     | 1.06  | 0.77 | -1.01 | 0.7951 | 1.1   | 0.1337 | 1.01  | 0.9366 | 1.11  | 0.535  |
| 97273_at   | 1417655_a_at | ---           | ---                                            | -1.05 | 0.73 | 1.3   | 0.089  | 1.18  | 0.3311 | 1.44  | 0.0141 | 1.1   | 0.5219 |
| 97274_at   | 1421751_a_at | Psmd14        | proteasome (prosome, macropain) 26S sub        | 1.87  | 0.05 | 1.22  | 0.0785 | -1.04 | 0.7902 | 1.17  | 0.0475 | -1.44 | 0.0188 |
| 97276_at   | 1448533_at   | Ckap1         | cytoskeleton-associated protein 1              | 1.19  | 0.45 | 1.18  | 0.1021 | 1.02  | 0.8972 | 1.21  | 0.1747 | 1.2   | 0.6124 |
| 97277_at   | 1460702_at   | 1810015M01Rik | RIKEN cDNA 1810015M01 gene                     | 1.22  | 0.35 | -1.15 | 0.1079 | -1.02 | 0.8426 | -1.12 | 0.1254 | -1.66 | 0.0118 |
| 97279_at   | 1435967_s_at | Hibadh        | 3-hydroxyisobutyrate dehydrogenase             | -1.09 | 0.63 | 1.04  | 0.5478 | -1.04 | 0.5404 | -1.07 | 0.2663 | -1.33 | 0.0093 |
| 97281_at   | 1416745_x_at | Uap1          | UDP-N-acetylglucosamine pyrophosphoryla        | -1.55 | 0.24 | 1.11  | 0.457  | 1.24  | 0.0719 | 1.06  | 0.7073 | 1.08  | 0.7751 |
| 97282_at   | 1456456_x_at | Mela          | Melanoma antigen                               | 1.73  | 0.38 | -1.31 | 0.0119 | -1.23 | 0.3153 | -1.29 | 0.0076 | -1.58 | 0.2077 |
| 97283_at   | 1424295_at   | Dppa3         | developmental pluripotency-associated 3        | 1.38  | 0.52 | -1.53 | 0.2627 | -1.47 | 0.3575 | -1.31 | 0.4661 | 2.26  | 0.1358 |
| 97284_at   | 1424406_at   | Bcl2l13       | BCL2-like 13 (apoptosis facilitator)           | -1    | 1    | 1.04  | 0.5527 | 1.09  | 0.1691 | 1.1   | 0.2005 | -1.15 | 0.3246 |
| 97292_at   | 1452167_at   | 2810407C02Rik | RIKEN cDNA 2810407C02 gene                     | -1.37 | 0.02 | 1.07  | 0.1109 | 1.02  | 0.8193 | -1.02 | 0.6654 | -1.11 | 0.006  |
| 97293_at   | 1423741_at   | Rbm10         | RNA binding motif protein 10                   | 7.94  | 0.08 | 1.27  | 0.2015 | 1.69  | 0.0056 | 1.65  | 0.0275 | -1.17 | 0.6946 |
| 97296_at   | 1452144_a_at | Mrpl44        | mitochondrial ribosomal protein L44            | 1.9   | 0.01 | 1.37  | 0.0042 | 1.17  | 0.1139 | 1.27  | 0.0168 | 1.07  | 0.5201 |
| 97297_at   | 1452913_at   | Pcp4l1        | Purkinje cell protein 4-like 1                 | 12.41 | 0.1  | 3.69  | 0.0001 | 1.56  | 0.0022 | 2.58  | 0.0004 | 19.6  | 0      |
| 97301_at   | 1419246_s_at | Rab14         | RAB14, member RAS oncogene family              | 1.08  | 0.33 | 1.18  | 0.0007 | 1.11  | 0.2481 | 1.11  | 0.0814 | -1.06 | 0.3231 |
| 97302_at   | 1450084_s_at | Ivns1abp      | influenza virus NS1A binding protein           | 2.03  | 0.07 | 1.88  | 0.0009 | 1.44  | 0.0338 | 2.19  | 0      | 2.04  | 0.0107 |
| 97304_at   | 1460655_a_at | Ubp1          | upstream binding protein 1                     | -1.13 | 0.63 | -1.02 | 0.8244 | 1.17  | 0.1737 | 1.06  | 0.5894 | -1.15 | 0.2418 |
| 97305_at   | 1448480_at   | 1110017C15Rik | RIKEN cDNA 1110017C15 gene                     | 1.43  | 0.04 | 1.15  | 0.0719 | 1.01  | 0.9264 | 1.09  | 0.3658 | 1.07  | 0.7675 |
| 97307_f_at | 1417102_a_at | Ndufb5        | NADH dehydrogenase (ubiquinone) 1 beta s       | 1.25  | 0.19 | 1.04  | 0.4754 | 1.11  | 0.1816 | 1.07  | 0.3452 | 1.14  | 0.2359 |
| 97308_at   | 1454669_at   | 5730466P16Rik | RIKEN cDNA 5730466P16 gene                     | 1.02  | 0.84 | 1.09  | 0.21   | 1.14  | 0.2094 | 1.06  | 0.4067 | 1.21  | 0.1654 |
| 97309_at   | 1460193_at   | St13          | suppression of tumorigenicity 13               | 1.01  | 0.88 | 1.13  | 0.0769 | 1.07  | 0.4191 | -1    | 0.9721 | 1.26  | 0.2576 |
| 97311_at   | 1423189_at   | 6720456B07Rik | RIKEN cDNA 6720456B07 gene                     | 1.05  | 0.49 | 1.05  | 0.5086 | 1.07  | 0.2978 | 1.01  | 0.9396 | -1.14 | 0.2714 |
| 97312_at   | 1416440_at   | Cd164         | CD164 antigen                                  | -1.67 | 0.11 | 1.04  | 0.7117 | 1.07  | 0.6361 | -1.11 | 0.2005 | -1.73 | 0.0004 |
| 97313_at   | 1451070_at   | Gdi1          | guanosine diphosphate (GDP) dissociation i     | -1.1  | 0.41 | -1.13 | 0.2699 | 1.08  | 0.4627 | -1.09 | 0.4754 | 1.03  | 0.8591 |
| 97315_at   | 1424258_at   | Polr2d        | polymerase (RNA) II (DNA directed) polypep     | 1.13  | 0.73 | -1.06 | 0.4854 | -1.26 | 0.0114 | -1.1  | 0.1222 | -1.2  | 0.0534 |
| 97316_at   | 1448382_at   | Ehhadh        | enoyl-Coenzyme A, hydratase/3-hydroxyacy       | 1.92  | 0.01 | 1.26  | 0.0239 | 1.26  | 0.0376 | 1.46  | 0.0107 | -1.33 | 0.0723 |

|            |              |               |                                                |       |      |       |        |       |        |       |        |       |        |
|------------|--------------|---------------|------------------------------------------------|-------|------|-------|--------|-------|--------|-------|--------|-------|--------|
| 97317_at   | 1448136_at   | Enpp2         | ectonucleotide pyrophosphatase/phosphodi       | 2.51  | 0.01 | 3.75  | 0      | 1.66  | 0.001  | 4.14  | 0      | 5.34  | 0.0016 |
| 97318_at   | 1451040_at   | Hars2         | histidyl tRNA synthetase 2                     | 1.31  | 0.15 | 1.3   | 0.0012 | 1.19  | 0.1015 | 1.26  | 0.0209 | 1.01  | 0.9673 |
| 97319_at   | 1422562_at   | Rrad          | Ras-related associated with diabetes           | 1.05  | 0.91 | 1.2   | 0.3943 | -1.49 | 0.1039 | 1.11  | 0.6627 | 1.04  | 0.8903 |
| 97320_at   | 1451139_at   | Slc39a4       | solute carrier family 39 (zinc transporter), m | -1.22 | 0.01 | 1.1   | 0.1323 | 1.01  | 0.9104 | 1.17  | 0.1528 | -1.59 | 0.0451 |
| 97322_at   | 1418826_at   | Ms4a6b        | membrane-spanning 4-domains, subfamily 4       | -1.63 | 0.22 | 2.4   | 0.4019 | -1.98 | 0.1164 | 3.21  | 0.1916 | 1.04  | 0.9282 |
| 97324_at   | 1424496_at   | 5133401N09Rik | RIKEN cDNA 5133401N09 gene                     | 1.23  | 0.49 | 1.14  | 0.3482 | -1.14 | 0.2325 | 1.21  | 0.165  | -1.07 | 0.8186 |
| 97325_at   | 1451253_at   | ---           | ---                                            | 1.16  | 0.28 | -1.01 | 0.8061 | 1.13  | 0.1719 | 1.2   | 0.1134 | 1.28  | 0.139  |
| 97327_at   | 1421731_a_at | Fen1          | flap structure specific endonuclease 1         | -1.6  | 0.09 | 1.55  | 0.0131 | 1.39  | 0.0068 | 1.57  | 0.0197 | 1.04  | 0.842  |
| 97328_at   | 1456618_at   | ---           | ---                                            | -1.43 | 0.43 | -1.35 | 0.4065 | -1.97 | 0.0907 | -1.27 | 0.5067 | 1.88  | 0.2351 |
| 97329_at   | 1423922_s_at | C77668        | expressed sequence C77668                      | 2.53  | 0.01 | -1.22 | 0.0026 | -1.21 | 0.0465 | -1.18 | 0.0121 | -1.52 | 0.2693 |
| 97330_at   | 1420157_s_at | Abcf1         | ATP-binding cassette, sub-family F (GCN20      | -1.06 | 0.49 | 1.04  | 0.584  | -1.03 | 0.7556 | -1.01 | 0.9487 | 1.14  | 0.2985 |
| 97331_at   | 1416265_at   | Capn10        | calpain 10                                     | -1.01 | 0.98 | -1.02 | 0.8075 | -1.03 | 0.7861 | -1.21 | 0.0056 | -1.44 | 0.0518 |
| 97332_at   | 1416378_at   | Pnkp          | polynucleotide kinase 3'- phosphatase          | 1.18  | 0.43 | 1.02  | 0.7668 | 1.2   | 0.0291 | 1.21  | 0.0037 | -1.48 | 0.0457 |
| 97333_at   | 1416648_at   | Dnchc1        | dynein, cytoplasmic, heavy chain 1             | 1.22  | 0.48 | -1.11 | 0.2285 | 1.09  | 0.3    | -1.01 | 0.8938 | 1.32  | 0.0205 |
| 97334_at   | 1452021_a_at | Hes6          | hairy and enhancer of split 6 (Drosophila)     | -1.4  | 0.02 | -2.37 | 0      | -1.61 | 0.0007 | -2.65 | 0      | -3.42 | 0.0313 |
| 97335_at   | 1418765_at   | Timd2         | T-cell immunoglobulin and mucin domain co      | 1.06  | 0.77 | -1.29 | 0.001  | -1.03 | 0.7563 | -1.56 | 0      | -2.51 | 0      |
| 97336_at   | 1451019_at   | Ctsf          | cathepsin F                                    | 1.47  | 0.04 | 1.2   | 0.0645 | 1.11  | 0.3117 | 1.22  | 0.0068 | 1.41  | 0.1742 |
| 97339_at   | 1454759_at   | Git1          | G protein-coupled receptor kinase-interactor   | 1.41  | 0.15 | 1.21  | 0.0305 | 1.21  | 0.0171 | 1.16  | 0.0285 | 1.42  | 0.0691 |
| 97340_at   | 1417547_at   | Sart3         | squamous cell carcinoma antigen recognize      | 2.39  | 0.2  | 1.05  | 0.6554 | 1.33  | 0.0121 | 1.24  | 0.0671 | 1.41  | 0.0057 |
| 97341_at   | 1416782_s_at | Praf2         | PRA1 domain family 2                           | 1.5   | 0.41 | 1.45  | 0.2582 | -1.12 | 0.7226 | 1.42  | 0.3899 | 1.49  | 0.1389 |
| 97342_at   | 1420489_at   | Mrps14        | mitochondrial ribosomal protein S14            | 1.38  | 0.02 | -1.03 | 0.5467 | 1.07  | 0.1826 | 1.06  | 0.3114 | -1.21 | 0.1037 |
| 97343_at   | 1424288_at   | D5Wsu46e      | DNA segment, Chr 5, Wayne State Universi       | -1.15 | 0.44 | -1.01 | 0.901  | 1.13  | 0.1099 | 1.05  | 0.329  | 1.47  | 0.0179 |
| 97345_at   | 1420592_a_at | Anp32e        | acidic (leucine-rich) nuclear phosphoprotein   | -1.2  | 0.44 | -1.03 | 0.6943 | -1.32 | 0.0237 | -1.35 | 0.0051 | 1.08  | 0.6724 |
| 97346_at   | 1428552_at   | 2610001J05Rik | RIKEN cDNA 2610001J05 gene                     | -1.1  | 0.8  | 1.23  | 0.1004 | 1.08  | 0.6596 | 1.11  | 0.3231 | 1.18  | 0.5739 |
| 97347_at   | 1436665_a_at | Ltbp4         | latent transforming growth factor beta bindin  | 1.3   | 0.32 | -1.15 | 0.195  | 1.06  | 0.6001 | -1.22 | 0.0894 | -1.3  | 0.1709 |
| 97349_at   | 1451264_at   | 4930488L10Rik | RIKEN cDNA 4930488L10 gene                     | -2.11 | 0.24 | 1.22  | 0.3357 | -1.01 | 0.9713 | 1.21  | 0.3246 | 2.59  | 0.0191 |
| 97352_f_at | 1435275_at   | Cox6b2        | cytochrome c oxidase subunit VIb polypeptic    | 3.37  | 0.14 | 1.35  | 0.2623 | 2.36  | 0.0145 | 2.76  | 0.0134 | 1.76  | 0.0562 |
| 97353_at   | 1433558_at   | Dab2ip        | disabled homolog 2 (Drosophila) interacting    | 1.82  | 0.37 | 1.3   | 0.2425 | -1.12 | 0.7303 | 1.53  | 0.0372 | 1.96  | 0.0232 |
| 97354_at   | 1434066_at   | Gtf3c1        | general transcription factor III C 1           | -1.24 | 0.34 | 1.02  | 0.7926 | 1.05  | 0.6156 | 1.03  | 0.769  | 1.14  | 0.3318 |
| 97355_at   | 1437728_at   | AW050020      | expressed sequence AW050020                    | 2.16  | 0.01 | -1.31 | 0.123  | -1.36 | 0.1005 | 1.11  | 0.3959 | -2.05 | 0.0402 |
| 97356_at   | 1460424_at   | 1810008O21Rik | RIKEN cDNA 1810008O21 gene                     | -1.16 | 0.75 | 1.14  | 0.0309 | 1.1   | 0.3477 | 1.11  | 0.0735 | 1.02  | 0.9318 |
| 97357_at   | 1451507_at   | Mef2c         | myocyte enhancer factor 2C                     | 1.24  | 0.7  | -1.36 | 0.3933 | -1.32 | 0.4208 | 1.05  | 0.8559 | 2.03  | 0.0849 |
| 97358_at   | 1428510_at   | Lphn1         | Latrophilin 1                                  | -1.12 | 0.6  | 1.14  | 0.2461 | 1.38  | 0.0141 | 1.26  | 0.0354 | 1.4   | 0.0097 |
| 97359_at   | 1418198_a_at | Tm9sf1        | transmembrane 9 superfamily member 1           | -1.56 | 0.13 | 1.03  | 0.5631 | 1.01  | 0.8376 | -1.06 | 0.2065 | -1.18 | 0.1562 |
| 97360_at   | 1448316_at   | Cklfsf3       | chemokine-like factor super family 3           | -1.34 | 0.64 | 2.2   | 0.0415 | 1.84  | 0.1831 | 1.94  | 0.1513 | 4.25  | 0.0007 |
| 97363_at   | 1423059_at   | Ptk2          | PTK2 protein tyrosine kinase 2                 | 1.15  | 0.33 | -1.05 | 0.6759 | 1.07  | 0.5705 | -1.08 | 0.4695 | 1.05  | 0.5428 |
| 97364_at   | 1423714_at   | Asf1b         | ASF1 anti-silencing function 1 homolog B (S    | -1.45 | 0.07 | -1.14 | 0.7094 | -1.71 | 0.1157 | 1.19  | 0.6006 | 1.07  | 0.8398 |
| 97365_at   | 1434755_at   | Coro2b        | coronin, actin binding protein, 2B             | -1.63 | 0.42 | -1.08 | 0.6186 | 1.15  | 0.1794 | -1.19 | 0.2435 | 2.01  | 0.2365 |
| 97366_at   | 1424326_at   | Lemd2         | LEM domain containing 2                        | -1.33 | 0.08 | 1.04  | 0.5663 | 1.22  | 0.0054 | 1.1   | 0.0515 | 1.09  | 0.2687 |
| 97367_at   | 1449019_at   | Akap1         | A kinase (PRKA) anchor protein 1               | -1.21 | 0.62 | 1.16  | 0.0819 | 1.06  | 0.3838 | 1.12  | 0.1931 | -1.06 | 0.6021 |
| 97369_g_at | 1418279_a_at | Akap1         | A kinase (PRKA) anchor protein 1               | -1.48 | 0.52 | 1.04  | 0.73   | -1.04 | 0.7629 | -1.17 | 0.1041 | -1.05 | 0.9021 |
| 97370_at   | 1452076_at   | 4633402N23Rik | RIKEN cDNA 4633402N23 gene                     | 1.06  | 0.8  | 1.01  | 0.7464 | 1.09  | 0.1312 | 1.09  | 0.1183 | -1    | 0.929  |
| 97371_at   | 1452715_at   | 2310022K01Rik | RIKEN cDNA 2310022K01 gene                     | -1.43 | 0.21 | 1.39  | 0.129  | -1.01 | 0.9568 | 1.49  | 0.1558 | 1.25  | 0.3396 |
| 97373_at   | 1424316_at   | Slc25a19      | solute carrier family 25 (mitochondrial deoxy  | -1.14 | 0.77 | -1.05 | 0.5329 | -1.07 | 0.4619 | -1.19 | 0.054  | 1.11  | 0.2664 |
| 97374_at   | 1428452_at   | 2810025M15Rik | RIKEN cDNA 2810025M15 gene                     | 2.01  | 0.07 | -1.35 | 0.0751 | -1.17 | 0.2725 | -1.3  | 0.0966 | 1.1   | 0.8532 |
| 97375_at   | 1460210_at   | Pkd1          | polycystic kidney disease 1 homolog            | -1.23 | 0    | 1.09  | 0.4831 | -1.02 | 0.8306 | -1.02 | 0.8274 | 1.38  | 0.1035 |
| 97377_at   | 1416692_at   | Coil          | coilin                                         | 1.06  | 0.9  | 1.47  | 0.1577 | 1.37  | 0.273  | 1.28  | 0.353  | -1.26 | 0.4285 |
| 97379_at   | 1449088_at   | Fbp2          | fructose bisphosphatase 2                      | -2.17 | 0.24 | -1.15 | 0.4188 | 1.44  | 0.3479 | 1.1   | 0.7433 | -1.9  | 0.2369 |
| 97380_at   | 1431745_a_at | 2700069A02Rik | RIKEN cDNA 2700069A02 gene                     | 1.3   | 0.49 | 1.2   | 0.0164 | 1.26  | 0.0024 | 1.12  | 0.1678 | -1.03 | 0.893  |
| 97381_s_at | 1420730_a_at | Tcp11         | t-complex protein 11                           | -1.16 | 0.7  | -1.35 | 0.2942 | -1.02 | 0.9424 | -1.53 | 0.1639 | 1.06  | 0.8156 |
| 97385_at   | 1419509_a_at | Nagk          | N-acetylglucosamine kinase                     | 1.28  | 0.52 | 1.01  | 0.8712 | -1.06 | 0.4649 | -1.03 | 0.6096 | 1.47  | 0.0308 |
| 97386_at   | 1436026_at   | MGI:2662729   | ES neuronal differentiation 2                  | -1.12 | 0.53 | -1.26 | 0.0372 | 1.17  | 0.1555 | -1.18 | 0.142  | -1.09 | 0.6893 |
| 97390_at   | 1417132_at   | Cdc25a        | cell division cycle 25 homolog A (S. cerevisi: | -1.35 | 0.17 | 1.1   | 0.1593 | 1.18  | 0.0519 | 1.04  | 0.5426 | 1.73  | 0.0563 |

|            |              |               |                                                |       |      |       |        |       |        |       |        |       |        |
|------------|--------------|---------------|------------------------------------------------|-------|------|-------|--------|-------|--------|-------|--------|-------|--------|
| 97392_at   | 1415715_at   | 2410015J15Rik | RIKEN cDNA 2410015J15 gene                     | -1.39 | 0.11 | 1.16  | 0.1528 | 1.09  | 0.2945 | 1.09  | 0.3314 | 1.12  | 0.3467 |
| 97393_at   | 1425006_a_at | Vrk1          | vaccinia related kinase 1                      | 1.71  | 0.48 | 1.89  | 0.1011 | 1.66  | 0.183  | 2.43  | 0.0169 | 1.2   | 0.4307 |
| 97395_at   | 1460633_at   | Prp19         | PRP19/PSO4 homolog (S. cerevisiae)             | 1.22  | 0.26 | -1.08 | 0.3197 | -1.27 | 0.0119 | -1.26 | 0.0183 | 1.02  | 0.899  |
| 97397_at   | 1417265_s_at | D5Ertcd33e    | DNA segment, Chr 5, ERATO Doi 33, expre        | 1.07  | 0.82 | 1.03  | 0.6058 | -1.09 | 0.3847 | 1.01  | 0.9226 | 1.28  | 0.0465 |
| 97398_at   | 1425615_a_at | Pck2          | phosphoenolpyruvate carboxykinase 2 (mito      | -1.2  | 0.62 | 1.36  | 0.2183 | 1.45  | 0.2    | 1.51  | 0.1324 | 1.35  | 0.2705 |
| 97400_at   | 1424806_s_at | 1110039B18Rik | RIKEN cDNA 1110039B18 gene                     | 1.16  | 0.38 | -1.31 | 0.1566 | -1.01 | 0.9496 | -1.01 | 0.926  | -1.7  | 0.0403 |
| 97401_at   | 1460676_at   | 1300006C06Rik | RIKEN cDNA 1300006C06 gene                     | 1.3   | 0.01 | 1.23  | 0.0017 | 1.13  | 0.0585 | 1.22  | 0.002  | 1.43  | 0.0094 |
| 97402_at   | 1418697_at   | Inmt          | indolethylamine N-methyltransferase            | 1.14  | 0.23 | 1.44  | 0.0006 | 1.19  | 0.0462 | 1.62  | 0      | 1.4   | 0.0083 |
| 97404_at   | 1429038_at   | 1500034J01Rik | RIKEN cDNA 1500034J01 gene                     | 1.85  | 0.19 | 1.23  | 0.016  | 1.03  | 0.808  | 1.25  | 0.0084 | 1.02  | 0.9589 |
| 97405_at   | 1416896_at   | Rps6ka1       | ribosomal protein S6 kinase polypeptide 1      | -1.43 | 0.04 | 1     | 0.9169 | 1.02  | 0.6608 | 1.03  | 0.5698 | -1.13 | 0.5101 |
| 97406_at   | 1434757_at   | Cbfa2t2h      | core-binding factor, runt domain, alpha subu   | 1.23  | 0.06 | 1.08  | 0.3488 | -1    | 0.9661 | 1.04  | 0.5501 | 1.05  | 0.7331 |
| 97407_at   | 1416963_at   | ---           | ---                                            | 1.37  | 0.08 | 1.28  | 0.0602 | 1.28  | 0.0267 | 1.17  | 0.2069 | -1.39 | 0.0524 |
| 97409_at   | 1418825_at   | Ifi1          | interferon inducible protein 1                 | 1.1   | 0.68 | 1.58  | 0.391  | -1.64 | 0.0267 | 1.41  | 0.4398 | -1.75 | 0.009  |
| 97410_at   | 1454712_at   | Mcart1        | mitochondrial carrier triple repeat 1          | 1.26  | 0.49 | -1.26 | 0.0608 | -1.49 | 0.0096 | -1.38 | 0.0121 | -1.16 | 0.4763 |
| 97411_at   | 1419513_a_at | Ect2          | ect2 oncogene                                  | -1.13 | 0.66 | -2.12 | 0.002  | -2    | 0.0039 | -2.4  | 0.0006 | -1.47 | 0.2304 |
| 97412_at   | 1428004_at   | 3300001G02Rik | RIKEN cDNA 3300001G02 gene                     | 1.29  | 0.03 | -1.06 | 0.3223 | 1.06  | 0.1835 | -1.08 | 0.1134 | -1.2  | 0.2218 |
| 97413_at   | 1423933_a_at | 1600029D21Rik | RIKEN cDNA 1600029D21 gene                     | -1.54 | 0.02 | -1.95 | 0.0027 | -1.18 | 0.3102 | -3.04 | 0.0001 | 1.1   | 0.6698 |
| 97414_at   | 1423827_s_at | Al326906      | expressed sequence Al326906                    | 1.24  | 0.19 | 1.15  | 0.1142 | -1.05 | 0.453  | -1.01 | 0.8712 | -1.11 | 0.4159 |
| 97415_at   | 1418890_a_at | Rab3d         | RAB3D, member RAS oncogene family              | 4.79  | 0.01 | 1.39  | 0.0156 | 1.71  | 0.0064 | 1.8   | 0.0017 | 1.32  | 0.5017 |
| 97418_at   | 1418914_s_at | Bhmt2         | betaine-homocysteine methyltransferase 2       | 1.36  | 0.21 | -1.03 | 0.5906 | -1.1  | 0.1304 | -1.04 | 0.3564 | -1.24 | 0.0111 |
| 97419_at   | 1426765_at   | Commnd7       | COMM domain containing 7                       | -1.09 | 0.44 | -1.11 | 0.1139 | -1.19 | 0.0261 | -1.13 | 0.1132 | 1.05  | 0.5381 |
| 97420_at   | 1417290_at   | Lrg1          | leucine-rich alpha-2-glycoprotein 1            | -1.87 | 0.04 | -1.04 | 0.8491 | 1.09  | 0.6104 | 1.23  | 0.3116 | -5.73 | 0.0193 |
| 97421_at   | 1448635_at   | Smc2l1        | SMC2 structural maintenance of chromosom       | 1.54  | 0.43 | 1.16  | 0.3923 | -1.03 | 0.8891 | 1.2   | 0.2489 | 1.05  | 0.8784 |
| 97422_at   | 1426735_at   | 2010002H18Rik | RIKEN cDNA 2010002H18 gene                     | 1.56  | 0.3  | 1.54  | 0      | 1.46  | 0.0076 | 1.72  | 0      | 1.11  | 0.2737 |
| 97423_at   | 1417474_at   | 1500035H01Rik | RIKEN cDNA 1500035H01 gene                     | -1    | 0.99 | 1.09  | 0.1698 | 1.25  | 0.0005 | 1.19  | 0.0083 | 1.44  | 0.0269 |
| 97424_at   | 1417225_at   | Arl6ip5       | ADP-ribosylation factor-like 6 interacting pro | 2.16  | 0    | -1.12 | 0.0719 | -1.18 | 0.0076 | -1.15 | 0.0076 | -1.42 | 0.0458 |
| 97425_at   | 1433645_at   | 2210409B22Rik | RIKEN cDNA 2210409B22 gene                     | -1.17 | 0.6  | -1.01 | 0.9473 | -1.02 | 0.9225 | -1.06 | 0.5256 | -1.21 | 0.2994 |
| 97426_at   | 1416529_at   | Emp1          | epithelial membrane protein 1                  | 1.73  | 0.01 | -1.07 | 0.6732 | -1.32 | 0.2113 | -1.09 | 0.6841 | 2.28  | 0.0259 |
| 97427_at   | 1418787_at   | Mbl2          | mannose binding lectin, serum (C)              | -1.26 | 0.22 | -1.85 | 0      | -1.37 | 0.0014 | -2.22 | 0      | -1.66 | 0.0004 |
| 97428_at   | 1423116_at   | Dom3z         | DOM-3 homolog Z (C. elegans)                   | -1.08 | 0.1  | 1.07  | 0.3539 | -1.07 | 0.4616 | 1.01  | 0.8941 | -1.12 | 0.7001 |
| 97429_at   | 1425678_a_at | Snrk          | SNF related kinase                             | 1.05  | 0.79 | -1.54 | 0.0038 | -1.09 | 0.4045 | -1.46 | 0.0089 | -1.03 | 0.9252 |
| 97430_at   | 1417042_at   | Slc37a4       | solute carrier family 37 (glycerol-6-phosphat  | 1.44  | 0.12 | 1.04  | 0.6093 | 1.51  | 0.001  | 1.34  | 0.0084 | -1.12 | 0.4705 |
| 97431_at   | 1417072_at   | Slc22a6       | solute carrier family 22 (organic anion transp | 1.54  | 0.17 | -1.01 | 0.9502 | 1.07  | 0.5592 | -1.11 | 0.3442 | 1.42  | 0.1676 |
| 97433_at   | 1448711_at   | ---           | ---                                            | 1.14  | 0.52 | 1.11  | 0.2337 | 1.15  | 0.0272 | 1.12  | 0.1922 | -1.07 | 0.6567 |
| 97434_at   | 1424839_a_at | 2810405F18Rik | RIKEN cDNA 2810405F18 gene                     | 1.25  | 0.62 | -1.02 | 0.6976 | 1.17  | 0.0681 | 1.13  | 0.0479 | -1.46 | 0.1319 |
| 97435_at   | 1419131_at   | F13b          | coagulation factor XIII, beta subunit          | -1.19 | 0.37 | 1.11  | 0.1159 | 1.1   | 0.3493 | -1    | 0.9611 | -1.12 | 0.2458 |
| 97436_at   | 1423687_a_at | Man2c1        | mannosidase, alpha, class 2C, member 1         | 1.51  | 0.1  | -1.09 | 0.146  | -1.03 | 0.4314 | 1.04  | 0.2915 | -1.03 | 0.7999 |
| 97437_f_at | 1447985_s_at | ---           | ---                                            | -1.09 | 0.74 | -1.08 | 0.7645 | -1.14 | 0.5144 | -1.01 | 0.9745 | 1.98  | 0.0011 |
| 97438_r_at | 1429193_at   | ---           | ---                                            | 1.09  | 0.81 | 1.22  | 0.3988 | 1.35  | 0.2844 | 1.38  | 0.1385 | -3.09 | 0.1182 |
| 97441_at   | 1421197_a_at | Acin1         | apoptotic chromatin condensation inducer 1     | 1.03  | 0.96 | 1.4   | 0.0457 | 1.26  | 0.3052 | 1.28  | 0.18   | 1.89  | 0.039  |
| 97442_at   | 1416832_at   | Slc39a8       | solute carrier family 39 (metal ion transporte | -1.08 | 0.59 | -1.04 | 0.621  | -1.04 | 0.6001 | -1.17 | 0.0835 | -1.04 | 0.767  |
| 97443_at   | 1460701_a_at | Mrp152        | mitochondrial ribosomal protein L52            | 1.46  | 0.04 | -1.06 | 0.1122 | 1.03  | 0.6183 | 1.04  | 0.1791 | 1.05  | 0.719  |
| 97444_at   | 1422476_at   | Ifi30         | interferon gamma inducible protein 30          | 2.15  | 0.14 | 1.55  | 0.1543 | 1.06  | 0.6907 | 1.54  | 0.2876 | -1.36 | 0.1474 |
| 97446_at   | 1416140_a_at | Dhx30         | DEAH (Asp-Glu-Ala-His) box polypeptide 30      | 1.09  | 0.5  | -1.05 | 0.7787 | 1.11  | 0.5218 | 1.09  | 0.6632 | -1.03 | 0.9073 |
| 97447_at   | 1451290_at   | Map1lc3a      | microtubule-associated protein 1 light chain   | 1.21  | 0.28 | -1.08 | 0.2511 | 1.02  | 0.8499 | -1.21 | 0.0072 | -1.09 | 0.5732 |
| 97450_s_at | 1460167_at   | Aldh7a1       | aldehyde dehydrogenase family 7, member        | 1.02  | 0.94 | 1.07  | 0.2893 | -1.02 | 0.5542 | 1.14  | 0.0161 | -1.42 | 0.0061 |
| 97451_at   | 1424024_at   | Mcfd2         | multiple coagulation factor deficiency 2       | -1.18 | 0.42 | -1.21 | 0.0005 | -1.11 | 0.061  | -1.42 | 0      | -1.6  | 0.0004 |
| 97452_at   | 1424572_a_at | H2afy         | H2A histone family, member Y                   | -1.54 | 0.37 | 1.01  | 0.9149 | -1.18 | 0.0564 | -1.2  | 0.0219 | 1.27  | 0.1623 |
| 97456_at   | 1428082_at   | Acsf5         | acyl-CoA synthetase long-chain family mem      | 1.39  | 0.3  | -1.13 | 0.1157 | 1.04  | 0.7913 | -1.1  | 0.1856 | -1.64 | 0.0013 |
| 97458_at   | 1454696_at   | LOC433812     | LOC433812                                      | 1.12  | 0.49 | -1.05 | 0.5769 | 1.04  | 0.6175 | 1.08  | 0.3588 | -1.74 | 0.1615 |
| 97459_at   | 1460339_at   | Pasma4        | proteasome (prosome, macropain) subunit, ;     | 1.08  | 0.76 | -1.1  | 0.0901 | -1.01 | 0.7141 | 1.05  | 0.3246 | -1.47 | 0.0212 |
| 97463_g_at | 1436687_x_at | 3110006P09Rik | RIKEN cDNA 3110006P09 gene                     | -1.02 | 0.92 | 1.01  | 0.8539 | 1.04  | 0.4926 | -1.04 | 0.5164 | -1.29 | 0.1341 |
| 97464_at   | 1426678_at   | 3110006P09Rik | RIKEN cDNA 3110006P09 gene                     | -1.2  | 0.37 | 1     | 0.9686 | -1.14 | 0.1311 | -1.25 | 0.0031 | -1.81 | 0.0002 |

|            |              |               |                                                 |       |      |       |        |       |        |       |        |       |        |
|------------|--------------|---------------|-------------------------------------------------|-------|------|-------|--------|-------|--------|-------|--------|-------|--------|
| 97465_at   | 1451879_a_at | Slc6a18       | solute carrier family 6 (neurotransmitter tran  | 1.18  | 0.82 | 1.41  | 0.2037 | 1.79  | 0.0671 | 1.46  | 0.1379 | 1.5   | 0.0551 |
| 97468_at   | 1448441_at   | Cks1b         | CDC28 protein kinase 1b                         | 1.75  | 0.17 | 1.48  | 0.0073 | 1.4   | 0.0546 | 1.53  | 0.0006 | -1.3  | 0.1466 |
| 97469_at   | 1452957_at   | Krtap3-3      | keratin associated protein 3-3                  | 1.1   | 0.75 | 1.28  | 0.0471 | 1.29  | 0.0599 | -1.03 | 0.8309 | 1.21  | 0.3203 |
| 97470_at   | 1427366_at   | Krtap3-1      | keratin associated protein 3-1                  | 1.19  | 0.26 | 1.1   | 0.4176 | 1.04  | 0.5045 | 1.09  | 0.5705 | 1.18  | 0.0144 |
| 97471_at   | 1415719_s_at | Armcl         | armadillo repeat containing 1                   | 1.11  | 0.59 | 1.08  | 0.1326 | 1.09  | 0.1682 | 1.15  | 0.0949 | 1.07  | 0.2396 |
| 97472_at   | 1424912_at   | Slc25a17      | solute carrier family 25 (mitochondrial carrie  | 1.03  | 0.89 | 1.03  | 0.6619 | -1.07 | 0.2339 | -1.08 | 0.3881 | -1.33 | 0.0415 |
| 97473_at   | 1448276_at   | Tspan4        | tetraspanin 4                                   | -1.07 | 0.61 | -1.23 | 0.0502 | -1.1  | 0.4708 | -1.17 | 0.1605 | -1.45 | 0.0304 |
| 97474_r_at | 1448254_at   | Ptn           | pleiotrophin                                    | 1.25  | 0.58 | 1.42  | 0.4011 | 1.67  | 0.2665 | 2.07  | 0.0497 | -3    | 0.2144 |
| 97475_at   | 1422843_at   | ---           | ---                                             | 1.43  | 0.55 | 1.15  | 0.3851 | 1.51  | 0.1199 | 1.38  | 0.043  | -1.32 | 0.558  |
| 97477_at   | 1431665_a_at | Timm8b        | translocase of inner mitochondrial membran      | 1.12  | 0.39 | -1.02 | 0.465  | 1.09  | 0.1482 | 1.01  | 0.7792 | -1.07 | 0.5673 |
| 97478_at   | 1460544_at   | Mak10         | MAK10 homolog, amino-acid N-acetyl/transf       | 1.37  | 0.15 | 1.04  | 0.6954 | 1.13  | 0.2135 | 1.11  | 0.2608 | 1.22  | 0.2125 |
| 97479_at   | 1417908_s_at | Ube2l3        | ubiquitin-conjugating enzyme E2L 3              | -1.3  | 0.04 | -1.2  | 0.0105 | -1.18 | 0.0281 | -1.3  | 0.0002 | -1.35 | 0.0012 |
| 97483_at   | 1416219_at   | Rpl19         | ribosomal protein L19                           | 1.15  | 0.37 | 1.12  | 0.024  | 1.15  | 0.0204 | 1.14  | 0.0106 | 1.52  | 0.026  |
| 97484_at   | 1426531_at   | Zmynd11       | zinc finger, MYND domain containing 11          | -1.03 | 0.62 | 1.08  | 0.321  | 1.02  | 0.8219 | 1.07  | 0.4393 | 1.42  | 0.0364 |
| 97486_at   | 1422509_at   | U2af1         | U2 small nuclear ribonucleoprotein auxiliary    | 1.7   | 0.14 | 1.06  | 0.4624 | -1.06 | 0.6072 | -1.02 | 0.791  | 1.17  | 0.3656 |
| 97487_at   | 1416666_at   | Serpine2      | serine (or cysteine) proteinase inhibitor, clac | 2.27  | 0.01 | -1.47 | 0.3854 | -1.88 | 0.1907 | -1.87 | 0.1838 | -3.18 | 0.0069 |
| 97488_at   | 1428144_at   | 1200011O22Rik | RIKEN cDNA 1200011O22 gene                      | -1.27 | 0.24 | 1.12  | 0.3552 | 1.07  | 0.503  | 1.12  | 0.1997 | 1.18  | 0.1176 |
| 97489_at   | 1433504_at   | Pygb          | brain glycogen phosphorylase                    | 2.05  | 0.14 | -1.08 | 0.7852 | -1.46 | 0.1955 | -1.19 | 0.5355 | -1.13 | 0.5505 |
| 97490_at   | 1448247_at   | Bcl7b         | B-cell CLL/lymphoma 7B                          | -1.29 | 0.25 | 1.29  | 0.0138 | 1.47  | 0.0018 | 1.29  | 0.0153 | 1.2   | 0.4611 |
| 97491_at   | 1427129_a_at | Hnrpr         | heterogeneous nuclear ribonucleoprotein R       | 1.25  | 0.36 | -1.07 | 0.3342 | -1.16 | 0.2002 | -1.05 | 0.5476 | -1.4  | 0.0745 |
| 97492_at   | 1415738_at   | 0610040B21Rik | RIKEN cDNA 0610040B21 gene                      | -1.18 | 0.48 | -1.04 | 0.5015 | 1.13  | 0.1975 | -1.06 | 0.3832 | -1.04 | 0.7494 |
| 97496_f_at | 1423771_at   | Prkcdbp       | protein kinase C, delta binding protein         | 4.24  | 0    | 1.04  | 0.893  | -1.79 | 0.1009 | 1.13  | 0.6913 | 2.31  | 0.0167 |
| 97497_at   | 1418634_at   | Notch1        | Notch gene homolog 1 (Drosophila)               | 2.41  | 0.18 | 1.64  | 0.0218 | 1.25  | 0.2857 | 1.41  | 0.0517 | 1.95  | 0.1621 |
| 97498_at   | 1417872_at   | Fhl1          | four and a half LIM domains 1                   | -1.14 | 0.67 | -1.51 | 0.3593 | -1.44 | 0.4019 | -1.43 | 0.4148 | 1.86  | 0.0329 |
| 97504_at   | 1448229_s_at | Ccnd2         | cyclin D2                                       | -1.33 | 0.55 | -1.52 | 0.1341 | -1.8  | 0.0319 | -1.99 | 0.0194 | 1.22  | 0.6779 |
| 97505_at   | 1451025_at   | Arl1          | ADP-ribosylation factor-like 1                  | 1.14  | 0.49 | -1.01 | 0.868  | 1.06  | 0.5355 | 1.14  | 0.0572 | -1.52 | 0.004  |
| 97506_at   | 1424873_at   | Rnf2          | ring finger protein 2                           | 1.39  | 0.35 | 1.16  | 0.4576 | 1.12  | 0.5607 | 1.24  | 0.2229 | -1.37 | 0.5425 |
| 97507_at   | 1448380_at   | Lgals3bp      | lectin, galactoside-binding, soluble, 3 binding | -1.14 | 0.23 | 1.06  | 0.6783 | -1.1  | 0.2254 | 1.22  | 0.3668 | -1.38 | 0.0454 |
| 97509_f_at | 1424050_s_at | Fgfr1         | fibroblast growth factor receptor 1             | -1.24 | 0.42 | 1.19  | 0.3465 | 1.19  | 0.3194 | 1.28  | 0.3472 | 1.83  | 0.069  |
| 97511_at   | 1450391_a_at | Mgll          | monoglyceride lipase                            | -1.02 | 0.94 | -1.58 | 0      | -1.22 | 0.0047 | -1.91 | 0      | -2.6  | 0.0077 |
| 97512_at   | 1428258_at   | 2010107E04Rik | RIKEN cDNA 2010107E04 gene                      | 1.59  | 0.22 | 1.06  | 0.3908 | 1.11  | 0.1377 | 1.08  | 0.3883 | 1.08  | 0.6662 |
| 97514_at   | 1435864_a_at | 1810063B05Rik | RIKEN cDNA 1810063B05 gene                      | 1.54  | 0.05 | -1.05 | 0.5083 | -1.03 | 0.7728 | 1.24  | 0.0021 | -1.02 | 0.8026 |
| 97515_at   | 1417369_at   | Hsd17b4       | hydroxysteroid (17-beta) dehydrogenase 4        | 1.39  | 0.17 | 1.02  | 0.7994 | 1.17  | 0.0501 | -1    | 0.9739 | -2.21 | 0.0001 |
| 97516_at   | 1415787_at   | Ganab         | alpha glucosidase 2 alpha neutral subunit       | -1.09 | 0.58 | -1.21 | 0.0176 | -1.31 | 0.0068 | -1.42 | 0      | -1.12 | 0.0333 |
| 97517_at   | 1460679_at   | Exosc4        | exosome component 4                             | 1.02  | 0.85 | 1.31  | 0.001  | 1.05  | 0.4711 | 1.2   | 0.0171 | 1.22  | 0.2057 |
| 97518_at   | 1448130_at   | Fdft1         | farnesyl diphosphate farnesyl transferase 1     | -1.12 | 0.73 | -1.04 | 0.6876 | 1.12  | 0.3326 | -1.12 | 0.183  | 1.41  | 0.0259 |
| 97519_at   | 1449254_at   | Spp1          | secreted phosphoprotein 1                       | 1.59  | 0    | 1.09  | 0.5274 | 1.23  | 0.2845 | 1.14  | 0.2634 | -1.57 | 0.0867 |
| 97520_s_at | 1423506_a_at | Nnat          | neuronatin                                      | -2.12 | 0.42 | 1.22  | 0.3385 | 1.21  | 0.1643 | 1.21  | 0.1208 | 1.48  | 0.0865 |
| 97524_f_at | 1416055_at   | Amy2          | amylase 2, pancreatic                           | 1.27  | 0.5  | -1.47 | 0.0175 | -1.18 | 0.3557 | -1.35 | 0.0754 | -1.15 | 0.536  |
| 97525_at   | 1422704_at   | Gyk           | glycerol kinase                                 | -1.39 | 0.03 | 1.32  | 0.0003 | 1.27  | 0.0223 | 1.37  | 0      | -1.05 | 0.668  |
| 97526_at   | 1448308_at   | Ap3m1         | adaptor-related protein complex 3, mu 1 sub     | 1.07  | 0.71 | -1.07 | 0.4254 | 1.05  | 0.7006 | -1.02 | 0.8336 | -1.28 | 0.1095 |
| 97527_at   | 1417458_s_at | Cks2          | CDC28 protein kinase regulatory subunit 2       | 1.26  | 0.25 | 1.13  | 0.2424 | -1.09 | 0.5281 | 1.1   | 0.3833 | -1.02 | 0.9257 |
| 97528_at   | 1423727_at   | Cnih          | cornichon homolog (Drosophila)                  | 1.31  | 0.13 | -1.13 | 0.1352 | -1.11 | 0.4015 | -1.28 | 0.0092 | -1.92 | 0      |
| 97529_at   | 1417732_at   | Anxa8         | annexin A8                                      | -1.36 | 0.68 | 1.23  | 0.5485 | 1.34  | 0.3627 | 1.04  | 0.8905 | -1.93 | 0.1006 |
| 97530_at   | 1425478_x_at | Ube2i         | ubiquitin-conjugating enzyme E2i                | 1.52  | 0.09 | -1.15 | 0.1413 | -1.09 | 0.329  | -1.16 | 0.0056 | -1.62 | 0.0902 |
| 97531_at   | 1448700_at   | ---           | ---                                             | -1.31 | 0.56 | -1.04 | 0.883  | -2.26 | 0.0033 | -2.19 | 0.0042 | -1.51 | 0.1441 |
| 97532_at   | 1451242_a_at | Ppp5c         | protein phosphatase 5, catalytic subunit        | 1.95  | 0.04 | 1.23  | 0.0987 | 1.12  | 0.4612 | 1.1   | 0.4022 | -1.32 | 0.4979 |
| 97535_at   | 1416004_at   | Ywhah         | tyrosine 3-monooxygenase/tryptophan 5-mo        | 1.2   | 0.36 | 1.19  | 0.0381 | 1.22  | 0.1772 | 1.27  | 0.0349 | 1.01  | 0.9236 |
| 97536_at   | 1434560_at   | Wdtdc1        | WD and tetratricopeptide repeats 1              | -1.11 | 0.74 | -1.09 | 0.3386 | -1.04 | 0.6854 | -1.04 | 0.6451 | 1.01  | 0.8981 |
| 97538_at   | 1448124_at   | Gusb          | glucuronidase, beta                             | 1.05  | 0.72 | 1.22  | 0.0504 | 1.18  | 0.1563 | 1.37  | 0.0089 | -1.28 | 0.2387 |
| 97539_at   | 1426749_at   | Hrmt1l3       | heterogeneous nuclear ribonucleoprotein m       | -1.01 | 0.99 | -1.1  | 0.7369 | -1.43 | 0.2487 | 1.99  | 0.0019 | 4.83  | 0.0886 |
| 97541_f_at | 1427651_x_at | H2-D1         | histocompatibility 2, D region locus 1          | -1.43 | 0.11 | 1.32  | 0.1923 | -1.05 | 0.5159 | 1.36  | 0.111  | -1.61 | 0.0017 |
| 97543_at   | 1423472_at   | 2-Sep         | septin 2                                        | 1.44  | 0.01 | 1.02  | 0.7903 | -1.12 | 0.3678 | 1.03  | 0.7302 | -1.15 | 0.2851 |



|            |              |                 |                                                |       |      |       |        |       |        |       |        |       |        |
|------------|--------------|-----------------|------------------------------------------------|-------|------|-------|--------|-------|--------|-------|--------|-------|--------|
| 97546_at   | 1450014_at   | Cldn1           | claudin 1                                      | 1.03  | 0.93 | -1.02 | 0.8975 | -1.05 | 0.7707 | -1.34 | 0.1463 | 1.55  | 0.1459 |
| 97548_at   | 1428172_at   | Prpf39          | PRP39 pre-mRNA processing factor 39 hom        | 3.41  | 0.13 | -1.18 | 0.3123 | 1.25  | 0.1564 | 1.16  | 0.2947 | -2.97 | 0.0887 |
| 97549_at   | 1418066_at   | Cfl2            | cofilin 2, muscle                              | -1.11 | 0.81 | -1.16 | 0.1927 | 1.08  | 0.5684 | -1.37 | 0.0095 | -2.5  | 0.0008 |
| 97550_at   | 1420813_at   | Hdac7a          | histone deacetylase 7A                         | 1.08  | 0.85 | 1.07  | 0.2848 | -1    | 0.967  | 1.1   | 0.254  | 1.13  | 0.4177 |
| 97551_at   | 1425553_s_at | Hip1r           | huntingtin interacting protein 1 related       | -1.28 | 0.63 | -1.32 | 0.0609 | -1.14 | 0.3998 | -1.21 | 0.29   | -1.03 | 0.955  |
| 97553_at   | 1452182_at   | Galnt2          | UDP-N-acetyl-alpha-D-galactosamine:polyp       | -1.28 | 0.03 | -1.24 | 0.0004 | -1.02 | 0.7452 | -1.28 | 0.0001 | -1.25 | 0.0891 |
| 97554_at   | 1456016_x_at | BC005624        | CDNA sequence BC005624                         | 1.18  | 0.29 | 1.08  | 0.1954 | 1.05  | 0.5181 | -1.04 | 0.591  | 1.18  | 0.2041 |
| 97556_at   | 1451356_at   | Anp32e          | acidic (leucine-rich) nuclear phosphoprotein   | -1.07 | 0.71 | -1.32 | 0.0265 | -1.41 | 0.0205 | -1.32 | 0.0258 | -1.68 | 0.022  |
| 97557_at   | 1438547_x_at | Tor2a           | torsin family 2, member A                      | 1.53  | 0.05 | -1.04 | 0.7211 | 1.03  | 0.703  | -1.12 | 0.238  | -1.52 | 0.0735 |
| 97559_at   | 1424736_at   | Eef2            | eukaryotic translation elongation factor 2     | 1.08  | 0.78 | -1.05 | 0.2225 | -1.01 | 0.91   | -1.09 | 0.0475 | 1.14  | 0.4069 |
| 97564_f_at | 1460423_x_at | IgM             | Ig kappa chain                                 | -1.99 | 0.19 | 1.54  | 0.1429 | 1.11  | 0.7258 | 1.65  | 0.149  | 1.03  | 0.9161 |
| 97580_at   | 1422048_at   | Trpc5           | transient receptor potential cation channel, s | -1.51 | 0.53 | -1.26 | 0.6232 | -2.19 | 0.039  | -1.33 | 0.434  | 1.64  | 0.176  |
| 97594_r_at | 1448189_a_at | Fliih           | flightless I homolog (Drosophila)              | -1.27 | 0.21 | 1.03  | 0.5656 | 1.01  | 0.8824 | -1.01 | 0.9137 | 1.2   | 0.2592 |
| 97645_f_at | 1447377_at   | LOC433721       | similar to hypothetical protein 4930503F14     | -1.75 | 0.24 | 1.17  | 0.4186 | 1.08  | 0.5805 | -1.04 | 0.7761 | 1.3   | 0.3865 |
| 97647_at   | 1416404_s_at | Rps16           | ribosomal protein S16                          | -1.04 | 0.87 | 1.09  | 0.0042 | 1.2   | 0.0014 | 1.23  | 0.0008 | 1.36  | 0.1985 |
| 97651_at   | 1419501_at   | Polk            | polymerase (DNA directed), kappa               | 1.44  | 0.54 | -1.64 | 0.1152 | -1.71 | 0.0957 | 1.05  | 0.873  | 3.01  | 0.0724 |
| 97652_at   | 1427611_at   | Ghrhr           | growth hormone releasing hormone recepto       | -1.46 | 0.1  | -1.01 | 0.8965 | 1.03  | 0.7506 | -1.06 | 0.5506 | 1.31  | 0.0973 |
| 97653_at   | 1427622_at   | Mem1            | maternal embryonic message 1                   | -1.18 | 0.42 | -1.57 | 0.3116 | -1.34 | 0.4706 | -1.67 | 0.2655 | 1.17  | 0.2568 |
| 97654_at   | 1427563_at   | Dlx6as          | distal-less homeobox 6, antisense              | 1.93  | 0.42 | 1.88  | 0.0339 | 2     | 0.0773 | 1.4   | 0.0592 | 1.52  | 0.3647 |
| 97655_at   | 1427637_a_at | Dsc3            | desmocollin 3                                  | -3.52 | 0.26 | -1.27 | 0.1727 | -1.18 | 0.3892 | -1.26 | 0.128  | -1.21 | 0.5523 |
| 97659_r_at | 1422447_at   | Ins1            | insulin I                                      | -1.48 | 0    | 1.07  | 0.2647 | 1.01  | 0.863  | -1    | 0.9651 | 1.18  | 0.2894 |
| 97661_at   | 1418682_at   | Tenr            | testis nuclear RNA binding protein             | 1.25  | 0.35 | 1     | 0.9998 | 1.23  | 0.1626 | -1.04 | 0.6831 | -1.43 | 0.2101 |
| 97666_r_at | 1457588_at   | C76213          | expressed sequence C76213                      | 2.07  | 0    | -1.29 | 0.4551 | -1.22 | 0.5369 | 1.24  | 0.5279 | 2.04  | 0.0665 |
| 97679_at   | 1421770_a_at | Tlx2            | T-cell leukemia, homeobox 2                    | 1.35  | 0.44 | 1.07  | 0.7422 | -1.04 | 0.8109 | -1.28 | 0.1694 | -1.09 | 0.7643 |
| 97680_at   | 1448854_s_at | Mug-ps1 /// Muç | murinoglobulin, pseudogene 1 /// murinoglot    | -1.62 | 0.03 | 1.16  | 0.068  | 1.11  | 0.2512 | 1.24  | 0.0173 | 1.04  | 0.7472 |
| 97681_f_at | 1427474_s_at | Gstm3           | glutathione S-transferase, mu 3                | 1.12  | 0.74 | 1.64  | 0.0073 | 1.3   | 0.0016 | 1.9   | 0.0001 | 1.75  | 0.0002 |
| 97683_at   | 1421481_at   | Tnfrsf9         | tumor necrosis factor receptor superfamily, r  | -2.25 | 0.43 | 1.24  | 0.4517 | 1.78  | 0.0091 | 1.72  | 0.0043 | -1.1  | 0.7474 |
| 97684_at   | 1419384_at   | Prkcabp         | protein kinase C, alpha binding protein        | -1.15 | 0.55 | 1.02  | 0.8899 | -1.04 | 0.8394 | 1     | 0.9734 | 2.09  | 0.0121 |
| 97688_at   | 1447958_at   | ---             | 16 days neonate thymus cDNA, RIKEN full-I      | -1.58 | 0.18 | 1.11  | 0.3078 | 1.18  | 0.0629 | 1.07  | 0.427  | 1.5   | 0.0028 |
| 97689_at   | 1417408_at   | F3              | coagulation factor III                         | 1.04  | 0.9  | 1.15  | 0.3498 | 1.16  | 0.3968 | 1.33  | 0.0675 | -1.05 | 0.8754 |
| 97690_at   | 1449641_at   | ---             | ---                                            | 1.32  | 0.51 | -1.27 | 0.0892 | -1.45 | 0.0097 | -1.22 | 0.0524 | -1.33 | 0.4572 |
| 97691_at   | 1419799_at   | ---             | Transcribed locus, strongly similar to XP_52   | -1.27 | 0.42 | -1.15 | 0.2042 | -1.19 | 0.2515 | -1.3  | 0.0441 | 1.29  | 0.1263 |
| 97692_at   | 1450477_at   | Htr2c           | 5-hydroxytryptamine (serotonin) receptor 2C    | -2.78 | 0.14 | -1.26 | 0.4893 | -1.05 | 0.869  | -1.15 | 0.6519 | 1.94  | 0.0491 |
| 97693_at   | 1443414_at   | C78513          | EST C78513                                     | -3.11 | 0.2  | -1.35 | 0.3484 | 1.72  | 0.0727 | 1.38  | 0.399  | -1.36 | 0.327  |
| 97695_s_at | 1426163_x_at | Rpl7            | ribosomal protein L7                           | 1.25  | 0.31 | 1.11  | 0.0374 | 1.09  | 0.1467 | 1.17  | 0.0017 | 1.35  | 0.0272 |
| 97697_at   | 1427452_at   | Rpl7            | ribosomal protein L7                           | -1.81 | 0.23 | -1.12 | 0.7656 | -1.4  | 0.4039 | -1.5  | 0.2956 | 1.33  | 0.6342 |
| 97698_at   | 1418548_at   | ---             | ---                                            | -1.39 | 0.55 | -1.48 | 0.1561 | 1.22  | 0.6485 | -1.1  | 0.808  | 1.28  | 0.589  |
| 97699_at   | 1421232_at   | Plxna1          | plexin A1                                      | 1.4   | 0.53 | -1.18 | 0.0444 | -1.01 | 0.8529 | -1.11 | 0.3489 | 1.96  | 0.0156 |
| 97700_at   | 1451593_at   | H2-Q1           | Histocompatibility 2, D region locus 1         | 1.07  | 0.85 | 1.81  | 0.0386 | -1.18 | 0.4989 | 2.07  | 0.1349 | 1.02  | 0.9701 |
| 97701_at   | 1458219_at   | Bcas2           | breast carcinoma amplified sequence 2          | 1.03  | 0.9  | -1.06 | 0.5789 | -1    | 0.9647 | 1.01  | 0.9219 | 1.19  | 0.6653 |
| 97703_at   | 1421945_a_at | Bxdc1           | brix domain containing 1                       | -1.15 | 0.6  | -1.24 | 0.0972 | -1.06 | 0.6625 | -1.12 | 0.3424 | -1.08 | 0.8089 |
| 97705_at   | 1453077_a_at | Snapc3          | small nuclear RNA activating complex, polyr    | 2.05  | 0.18 | 1.19  | 0.3786 | -1.15 | 0.5634 | -1.16 | 0.574  | 1.41  | 0.2024 |
| 97707_at   | 1448073_at   | LOC541456       | hypothetical LOC541456                         | -1.08 | 0.69 | 1.1   | 0.6484 | -1.07 | 0.809  | -1.47 | 0.1598 | 1.66  | 0.2355 |
| 97708_at   | 1459933_at   | ---             | ---                                            | -1.43 | 0.29 | 1.23  | 0.5472 | 1.15  | 0.7169 | 1.13  | 0.688  | 1.32  | 0.606  |
| 97709_at   | 1422080_at   | Il7             | interleukin 7                                  | -1.36 | 0.65 | -1.36 | 0.4308 | -1.34 | 0.439  | -1.3  | 0.4637 | -1.55 | 0.552  |
| 97710_f_at | 1448028_at   | C530046L02Rik   | RIKEN cDNA C530046L02 gene                     | 2.45  | 0.04 | 1.61  | 0.0025 | 2.26  | 0.0012 | 1.97  | 0.0004 | 3.13  | 0.0065 |
| 97711_at   | 1448024_at   | B430320C24Rik   | RIKEN cDNA B430320C24 gene                     | 1.97  | 0.22 | 1.09  | 0.5996 | 1.07  | 0.6335 | 1.11  | 0.5239 | 1.47  | 0.327  |
| 97712_at   | 1422994_at   | ---             | ---                                            | -1.43 | 0    | 1.42  | 0.2859 | 1.22  | 0.563  | 1.6   | 0.1699 | 3.7   | 0.1141 |
| 97713_at   | 1419327_at   | AA415817        | expressed sequence AA415817                    | -1.37 | 0.28 | -1.18 | 0.5285 | -1.38 | 0.1876 | -1.48 | 0.0698 | -1.04 | 0.6927 |
| 97714_r_at | 1457970_at   | Actr1a          | ARP1 actin-related protein 1 homolog A (ye     | 2.08  | 0.06 | 1.2   | 0.5139 | 1.5   | 0.1167 | -1.13 | 0.7133 | 1.35  | 0.5348 |
| 97717_at   | 1449592_at   | Tcf15           | transcription factor 15                        | -1.83 | 0.17 | 1.06  | 0.8428 | 1.03  | 0.9079 | 1.08  | 0.7394 | 1.07  | 0.6403 |
| 97718_at   | 1419334_at   | Ctla4           | cytotoxic T-lymphocyte-associated protein 4    | -1.57 | 0.57 | -1.19 | 0.6683 | 1.45  | 0.2363 | -1.06 | 0.8678 | 1.25  | 0.7271 |
| 97719_at   | 1420461_at   | Mst1r           | macrophage stimulating 1 receptor (c-met-re    | -1.66 | 0.01 | 1.05  | 0.7223 | -1.01 | 0.9553 | -1.06 | 0.7135 | 2.89  | 0.1053 |

|            |              |               |                                                                 |       |      |       |        |       |        |       |        |       |        |
|------------|--------------|---------------|-----------------------------------------------------------------|-------|------|-------|--------|-------|--------|-------|--------|-------|--------|
| 97721_at   | 1418376_at   | Fgf15         | fibroblast growth factor 15                                     | 1.09  | 0.56 | -1.18 | 0.3244 | -1.16 | 0.4151 | -1.02 | 0.8979 | 1.14  | 0.6914 |
| 97722_at   | 1417764_at   | Ssr1          | signal sequence receptor, alpha                                 | -1.25 | 0.38 | -1.18 | 0.3096 | -1.35 | 0.1447 | -1.92 | 0.0004 | -1.25 | 0.3053 |
| 97723_at   | 1422059_at   | Cbx2          | chromobox homolog 2 (Drosophila Pc class)                       | -1.8  | 0.07 | -1.13 | 0.3731 | -1.26 | 0.248  | -1.31 | 0.0707 | 1.36  | 0.1203 |
| 97725_at   | 1422872_at   | Bmpr1b        | bone morphogenetic protein receptor, type 1                     | -1.18 | 0.68 | -1.14 | 0.6197 | 1.36  | 0.1667 | 1     | 0.9917 | 1.4   | 0.2748 |
| 97726_at   | 1449245_at   | Grin2c        | glutamate receptor, ionotropic, NMDA2C (ep                      | -2.11 | 0    | -1.03 | 0.7929 | -1.1  | 0.3579 | -1.18 | 0.2346 | 1.14  | 0.5643 |
| 97727_at   | 1422300_at   | Nog           | noggin                                                          | -1.2  | 0.33 | -1.12 | 0.5651 | 1.04  | 0.7829 | -1.21 | 0.2805 | -1.18 | 0.7324 |
| 97728_at   | 1422987_at   | Ntn1          | netrin 1                                                        | 2.25  | 0.13 | -1.05 | 0.6032 | 1.05  | 0.6518 | -1.03 | 0.8162 | -1.16 | 0.701  |
| 97729_at   | 1420964_at   | Enc1          | ectodermal-neural cortex 1                                      | -3.74 | 0.01 | 1.44  | 0.1829 | 1.17  | 0.6095 | 1.24  | 0.4059 | 1.01  | 0.979  |
| 97730_at   | 1449588_at   | Abca4         | ATP-binding cassette, sub-family A (ABC1),                      | -1.55 | 0.29 | -1.27 | 0.4262 | -1.09 | 0.8228 | -1.53 | 0.2192 | 1.65  | 0.0663 |
| 97731_at   | 1420437_at   | Indo          | indoleamine-pyrrole 2,3 dioxygenase                             | -1.41 | 0.45 | -1.98 | 0.1725 | -1.24 | 0.5885 | -1.38 | 0.3818 | 1.39  | 0.5719 |
| 97732_at   | 1450453_a_at | Pde6g         | phosphodiesterase 6G, cGMP-specific, rod,                       | 1.13  | 0.8  | -1.04 | 0.8371 | 1.08  | 0.6107 | -1.06 | 0.7823 | -1.24 | 0.5076 |
| 97734_at   | 1449569_at   | Thpo          | thrombopoietin                                                  | -1.38 | 0.11 | -1.19 | 0.081  | -1.41 | 0.002  | -1.03 | 0.7721 | 1.23  | 0.5196 |
| 97735_at   | 1449571_at   | Trhr          | thyrotropin releasing hormone receptor                          | -1.02 | 0.97 | 1.03  | 0.9157 | -1.22 | 0.4118 | 1.39  | 0.3177 | -1.44 | 0.326  |
| 97736_at   | 1442384_at   | ---           | Transcribed locus                                               | -1.4  | 0.64 | 1.1   | 0.7257 | 1.04  | 0.9015 | -1.04 | 0.8894 | 2.5   | 0.0861 |
| 97738_r_at | 1433661_at   | BC034204      | cDNA sequence BC034204                                          | -1.1  | 0.62 | -1.03 | 0.6622 | -1    | 0.985  | 1.11  | 0.0968 | 1.01  | 0.8434 |
| 97740_at   | 1418401_a_at | Dusp16        | dual specificity phosphatase 16                                 | 1.4   | 0.26 | 1.08  | 0.2086 | -1.03 | 0.7165 | 1.07  | 0.2903 | 1.18  | 0.1611 |
| 97741_at   | 1450371_at   | Tshb          | thyroid stimulating hormone, beta subunit                       | 1.55  | 0.55 | -1.39 | 0.315  | -1    | 0.9937 | 1.22  | 0.5214 | 1.11  | 0.8557 |
| 97742_s_at | 1451882_a_at | Fgf8          | fibroblast growth factor 8                                      | -1.07 | 0.73 | 1.1   | 0.3678 | 1.36  | 0.0064 | 1.01  | 0.9025 | 1.17  | 0.6462 |
| 97743_at   | 1435949_at   | Zc3hdc3       | zinc finger CCCH type domain containing 3                       | -1.76 | 0.07 | 1.81  | 0.0009 | 1.66  | 0.0666 | 1.54  | 0.1275 | 1.39  | 0.2235 |
| 97745_at   | 1427354_at   | Hoxa4         | homeo box A4                                                    | -1.58 | 0.1  | -1.35 | 0.0262 | -1.29 | 0.0495 | -1.64 | 0.0004 | 1.28  | 0.0541 |
| 97750_at   | 1448245_at   | Lamr1         | laminin receptor 1 (ribosomal protein SA)                       | 1.1   | 0.33 | -1.02 | 0.6805 | 1.07  | 0.4331 | 1.11  | 0.0224 | 1.21  | 0.3031 |
| 97751_f_at | 1447999_x_at | LOC380690 /// | LOC380690 /// similar to glyceraldehyde-3-phosphate dehy        | 1.19  | 0.32 | 1.16  | 0.1676 | 1.15  | 0.0147 | 1.2   | 0.0172 | -1.16 | 0.0679 |
| 97752_at   | 1434292_at   | E130013N09Rii | RIKEN cDNA E130013N09 gene                                      | 2.67  | 0.28 | 2.35  | 0.0005 | 1.62  | 0.0832 | 2.93  | 0      | 3.3   | 0.0227 |
| 97753_at   | 1419392_at   | Pclo          | piccolo (presynaptic cytomatrix protein)                        | -1.29 | 0.35 | 1.1   | 0.4967 | 1.26  | 0.1348 | 1.17  | 0.2909 | 1.52  | 0.3005 |
| 97754_at   | 1456757_at   | G630024C07Rii | RIKEN cDNA G630024C07 gene                                      | -2.45 | 0.18 | -1.22 | 0.3702 | 1.01  | 0.9741 | -1.07 | 0.7359 | -1.28 | 0.3944 |
| 97755_at   | 1422830_s_at | Drd4          | dopamine receptor 4                                             | -2.17 | 0.01 | -1.02 | 0.8742 | 1.08  | 0.6557 | 1.01  | 0.9602 | 1.89  | 0.0267 |
| 97756_s_at | 1451769_s_at | Pcdh4a ///    | Pcdh4a /// Pcdh4a protocadherin alpha 4 /// protocadherin alpha | -1.31 | 0.59 | 1.07  | 0.7047 | 1.27  | 0.1188 | 1.01  | 0.9246 | -1.06 | 0.7637 |
| 97757_at   | 1420359_at   | Sva           | seminal vesicle antigen                                         | -1.16 | 0.81 | -1.21 | 0.4891 | 1.35  | 0.4388 | -1.84 | 0.0175 | -1.01 | 0.988  |
| 97758_at   | 1416000_a_at | Prdx1         | peroxiredoxin 1                                                 | 1.05  | 0.74 | -1.07 | 0.1101 | -1.03 | 0.5351 | -1.09 | 0.0171 | -1.01 | 0.7539 |
| 97760_at   | 1421327_at   | Mtap2         | microtubule-associated protein 2                                | 1.14  | 0.59 | 1.08  | 0.8269 | -1.08 | 0.59   | -1.03 | 0.8987 | 1.12  | 0.6005 |
| 97762_f_at | 1426171_x_at | Klra7         | killer cell lectin-like receptor, subfamily A, m                | -1.16 | 0.56 | -1.06 | 0.7779 | 1.01  | 0.9613 | -1.07 | 0.7418 | 1.44  | 0.1751 |
| 97763_at   | 1451767_at   | Ncf1          | neutrophil cytosolic factor 1                                   | -1.19 | 0.06 | 2.23  | 0.0925 | -1.43 | 0.2114 | 2.35  | 0.2827 | 1.84  | 0.0044 |
| 97765_g_at | 1425970_a_at | Ros1          | Ros1 proto-oncogene                                             | -1.5  | 0.67 | -1.37 | 0.5275 | 1.59  | 0.4116 | 1.47  | 0.4211 | -1.12 | 0.7523 |
| 97767_at   | 1420728_at   | Krt1-2        | keratin complex 1, acidic, gene 2                               | 1.15  | 0.44 | -1.3  | 0.0393 | -1.09 | 0.5195 | -1.11 | 0.338  | 1.53  | 0.0728 |
| 97768_at   | 1421156_a_at | Dsc2          | desmocollin 2                                                   | 1.58  | 0.37 | 1.41  | 0.0211 | 1.68  | 0.0269 | 1.33  | 0.0476 | -1.26 | 0.6451 |
| 97769_at   | 1420349_at   | Ptgrf         | prostaglandin F receptor                                        | -1.25 | 0.21 | 1.59  | 0.1981 | 1.76  | 0.0607 | 1.68  | 0.2012 | 1.59  | 0.3796 |
| 97771_r_at | 1448904_at   | D6Wsu176e     | DNA segment, Chr 6, Wayne State Universi                        | -4.05 | 0.27 | -1.25 | 0.2394 | 1.28  | 0.3778 | -1.6  | 0.0582 | 1.18  | 0.7906 |
| 97772_at   | 1422139_at   | Plau          | plasminogen activator, urokinase                                | -1.08 | 0.62 | -1.02 | 0.8681 | 1.05  | 0.4841 | -1.02 | 0.9068 | -1.1  | 0.7901 |
| 97774_at   | 1425432_at   | Oprm1         | opioid receptor, mu 1                                           | -1.47 | 0.14 | 1.93  | 0.0005 | 1.3   | 0.1111 | 1.47  | 0.0195 | 1.18  | 0.5353 |
| 97775_at   | 1442778_at   | AA511254      | expressed sequence AA511254                                     | -1.17 | 0.62 | -1.33 | 0.0016 | -1.12 | 0.1148 | -1.13 | 0.1592 | 1.39  | 0.4152 |
| 97776_at   | 1418950_at   | Drd2          | dopamine receptor 2                                             | -1.95 | 0.01 | -1.05 | 0.6872 | -1.03 | 0.8031 | -1.03 | 0.7953 | 1.69  | 0.0157 |
| 97777_at   | 1449566_at   | Nkx2-5        | NK2 transcription factor related, locus 5 (Drc                  | -1.63 | 0.22 | 1.1   | 0.4098 | 1.07  | 0.4323 | -1.03 | 0.7529 | 1.39  | 0.0533 |
| 97778_at   | 1421915_a_at | St3gal3       | ST3 beta-galactoside alpha-2,3-sialyltransfe                    | 5.28  | 0.19 | -1.41 | 0.0225 | -2.04 | 0.0018 | -2.06 | 0.0005 | -2.31 | 0.0082 |
| 97779_at   | 1449965_at   | Mcpt8         | mast cell protease 8                                            | -1.46 | 0.25 | 1.09  | 0.7721 | 1.34  | 0.3349 | -1.29 | 0.5026 | 1.14  | 0.7638 |
| 97780_at   | 1459934_at   | Usp42         | ubiquitin specific protease 42                                  | -2.09 | 0.3  | -1.16 | 0.5063 | -1.42 | 0.0949 | -1.07 | 0.6987 | 2.05  | 0.0797 |
| 97781_at   | 1422089_at   | Ncr1          | natural cytotoxicity triggering receptor 1                      | -1.16 | 0.85 | 1.9   | 0.0787 | 1.31  | 0.4835 | 2.45  | 0.0709 | 1.34  | 0.5902 |
| 97782_at   | 1450554_at   | Defb2         | defensin beta 2                                                 | 1.24  | 0.54 | 1.71  | 0.1013 | 1.35  | 0.2337 | 1.7   | 0.1056 | 3.41  | 0.0584 |
| 97783_at   | 1419413_at   | Ccl17         | chemokine (C-C motif) ligand 17                                 | 1.29  | 0.64 | 1.05  | 0.4209 | 1.22  | 0.1038 | 1.1   | 0.2146 | 1.48  | 0.1519 |
| 97784_at   | 1449237_at   | Aloxe3        | arachidonate lipoxygenase 3                                     | -1.24 | 0.25 | -1.05 | 0.6495 | -1.01 | 0.9228 | -1.08 | 0.3683 | 1.23  | 0.1877 |
| 97785_at   | 1419419_at   | D0H6S2654E    | DNA segment, human D6S2654E                                     | 1.11  | 0.8  | -1.03 | 0.805  | -1.06 | 0.5196 | -1.22 | 0.1124 | 1.21  | 0.399  |
| 97786_at   | 1419621_at   | Ankrd2        | ankyrin repeat domain 2 (stretch responsive                     | 1.55  | 0.16 | -1.27 | 0.1688 | -1.22 | 0.2059 | -1.3  | 0.1093 | 2.16  | 0.0074 |
| 97788_at   | 1419231_s_at | ---           | ---                                                             | -1.41 | 0.6  | -1.3  | 0.3228 | -1.22 | 0.4708 | -1.38 | 0.1671 | -1.04 | 0.8097 |
| 97789_at   | 1422213_s_at | ---           | ---                                                             | -1    | 0.96 | 1.03  | 0.6286 | 1.01  | 0.8999 | -1.03 | 0.662  | 1.2   | 0.2931 |

|            |              |                 |                                                |       |      |       |        |       |        |       |        |       |        |
|------------|--------------|-----------------|------------------------------------------------|-------|------|-------|--------|-------|--------|-------|--------|-------|--------|
| 97790_s_at | 1427512_a_at | Lama3           | laminin, alpha 3                               | -1.45 | 0.11 | 1.28  | 0.2376 | 1.13  | 0.5437 | 1.56  | 0.0436 | -1.99 | 0.1672 |
| 97791_at   | 1422146_at   | Sema5b          | sema domain, seven thrombospondin repea        | -2.31 | 0.21 | -1.14 | 0.7386 | 1.19  | 0.6105 | -1.09 | 0.8378 | 1.09  | 0.8363 |
| 97793_at   | 1420563_at   | Gria3           | glutamate receptor, ionotropic, AMPA3 (alph    | 1.11  | 0.67 | -1.19 | 0.501  | -1.1  | 0.6989 | 1.36  | 0.4472 | -1.01 | 0.9871 |
| 97794_at   | 1422040_at   | Sema7a          | sema domain, immunoglobulin domain (Ig),       | -1.38 | 0.52 | -1.15 | 0.3779 | -1.01 | 0.9239 | -1.44 | 0.0281 | -1.1  | 0.6309 |
| 97796_at   | 1450229_at   | Crsp2           | cofactor required for Sp1 transcriptional acti | -1.45 | 0.41 | -1.25 | 0.3704 | 1.09  | 0.722  | -1.04 | 0.8353 | -1.88 | 0.1355 |
| 97797_at   | 1430656_a_at | 2210409M21Rik   | RIKEN cDNA 2210409M21 gene                     | 1.55  | 0.19 | -1.01 | 0.8539 | 1.05  | 0.4354 | 1.08  | 0.205  | -1.06 | 0.6175 |
| 97798_at   | 1426656_at   | 4930504E06Rik   | RIKEN cDNA 4930504E06 gene                     | -1.4  | 0.05 | -1.53 | 0      | -1.14 | 0.1453 | -1.64 | 0      | -1.49 | 0.0047 |
| 97800_at   | 1460635_at   | Fastk           | Fas-activated serine/threonine kinase          | 1.24  | 0.55 | 1.08  | 0.216  | 1.01  | 0.9591 | 1.14  | 0.2226 | 1.13  | 0.5764 |
| 97803_at   | 1450919_at   | Mpp1            | membrane protein, palmitoylated                | 1.98  | 0.06 | 1.22  | 0.0361 | 1.22  | 0.0233 | 1.8   | 0      | 1.82  | 0.0106 |
| 97807_at   | 1416327_at   | 1110021H02Rik   | RIKEN cDNA 1110021H02 gene                     | 1.34  | 0.14 | 1.05  | 0.459  | -1.06 | 0.3724 | 1.09  | 0.11   | -1.17 | 0.0702 |
| 97808_at   | 1418562_at   | Sf3b1           | splicing factor 3b, subunit 1                  | 1.73  | 0.36 | 1.15  | 0.5579 | -2.62 | 0.001  | -1.8  | 0.0234 | 1.13  | 0.2841 |
| 97809_at   | 1460692_at   | Bat8            | HLA-B associated transcript 8                  | 1.17  | 0.28 | 1.16  | 0.0219 | 1.12  | 0.3373 | 1.2   | 0.0525 | 1.03  | 0.752  |
| 97811_at   | 1426534_a_at | Arfgap3         | ADP-ribosylation factor GTPase activating p    | 1.37  | 0.53 | 2.28  | 0.0221 | 2.31  | 0.02   | 2.88  | 0.0116 | 1.31  | 0.5774 |
| 97813_at   | 1419536_a_at | Rela            | v-rel reticuloendotheliosis viral oncogene ho  | -1.49 | 0.12 | -1.16 | 0.019  | -1.08 | 0.3632 | -1.14 | 0.1315 | -1.03 | 0.8025 |
| 97814_at   | 1427179_at   | Krt1-3          | keratin complex 1, acidic, gene 3              | 1.81  | 0.08 | -1.07 | 0.508  | -1.04 | 0.684  | 1     | 0.9932 | 1.16  | 0.3556 |
| 97816_at   | 1428907_at   | 2600011C06Rik   | RIKEN cDNA 2600011C06 gene                     | -1.04 | 0.8  | -1.01 | 0.9656 | -1.08 | 0.7007 | 1.17  | 0.2776 | -1.2  | 0.5759 |
| 97817_at   | 1428131_a_at | Cdc42se1        | CDC42 small effector 1                         | -1.01 | 0.94 | 1.03  | 0.7139 | -1.02 | 0.7249 | 1.12  | 0.205  | 1.26  | 0.0787 |
| 97818_at   | 1460182_at   | Snx4            | sorting nexin 4                                | 1.06  | 0.79 | 1.09  | 0.1241 | 1.09  | 0.4128 | 1.12  | 0.0236 | -1.2  | 0.3403 |
| 97819_at   | 1416531_at   | Gsto1           | glutathione S-transferase omega 1              | 1.34  | 0.16 | -1.07 | 0.1401 | 1.13  | 0.0934 | 1.01  | 0.9238 | 1.32  | 0.0324 |
| 97820_at   | 1417177_at   | Galk1           | galactokinase 1                                | 1.61  | 0.06 | 1.84  | 0.0086 | 1.57  | 0.0018 | 1.86  | 0      | 1.85  | 0.0112 |
| 97823_g_at | 1454887_at   | Pak2            | p21 (CDKN1A)-activated kinase 2                | -1.12 | 0.08 | 1     | 0.9906 | 1.06  | 0.3374 | 1.04  | 0.4765 | 1.24  | 0.057  |
| 97824_at   | 1416606_s_at | Nola2           | nucleolar protein family A, member 2           | 1.38  | 0.1  | -1.25 | 0.0369 | -1.1  | 0.4818 | -1.24 | 0.0578 | -1.03 | 0.7608 |
| 97825_at   | 1416271_at   | Perp            | PERP, TP53 apoptosis effector                  | 1.24  | 0.46 | -1.1  | 0.1667 | 1.11  | 0.2446 | -1.08 | 0.288  | -2.24 | 0.0009 |
| 97826_at   | 1426872_at   | A430096B05Rik   | RIKEN cDNA A430096B05 gene                     | -1.14 | 0.74 | -1.18 | 0.2176 | 1.21  | 0.3125 | -1.15 | 0.2843 | -1.08 | 0.1651 |
| 97828_at   | 1418377_a_at | MGI:1353606     | Cd27 binding protein (Hindu God of destruct    | 1.61  | 0.04 | 1.35  | 0      | -1.01 | 0.7934 | 1.2   | 0.003  | 2.32  | 0.0006 |
| 97829_at   | 1423657_at   | Cdipt           | CDP-diacylglycerol-inositol 3-phosphatidyltr   | -1    | 0.96 | -1.14 | 0.1286 | 1.05  | 0.6247 | -1.05 | 0.4911 | -1.08 | 0.3    |
| 97834_g_at | 1416069_at   | Pfklp           | phosphofructokinase, platelet                  | 2.99  | 0.03 | 3.15  | 0.1048 | 1.61  | 0.2289 | 3.3   | 0.0705 | -1.6  | 0.423  |
| 97835_at   | 1437902_s_at | Rarres2         | retinoic acid receptor responder (tazarotene   | 1.62  | 0.03 | 1.31  | 0      | 1     | 0.9355 | 1.36  | 0      | 1.63  | 0.0011 |
| 97836_at   | 1456600_a_at | Rnf7            | ring finger protein 7                          | 1.5   | 0.04 | 1     | 0.9799 | -1.01 | 0.946  | 1     | 0.9945 | -1.15 | 0.576  |
| 97838_at   | 1454703_x_at | Rnu22           | RNA, U22 small nucleolar                       | 1.8   | 0.01 | 1.22  | 0.0252 | 1.17  | 0.3224 | 1.37  | 0.0031 | 1.64  | 0.0396 |
| 97839_at   | 1429497_s_at | Snx6            | sorting nexin 6                                | 1.05  | 0.45 | 1.05  | 0.2819 | 1.07  | 0.2944 | 1.02  | 0.7634 | 1.13  | 0.0823 |
| 97841_at   | 1425591_a_at | Chmp2a          | chromatin modifying protein 2A                 | 1.65  | 0.12 | 1.2   | 0.1949 | 1.1   | 0.5291 | -1.03 | 0.785  | -1.02 | 0.8793 |
| 97843_at   | 1420808_at   | Ncoa4           | nuclear receptor coactivator 4                 | -1.13 | 0.1  | 1.07  | 0.2208 | 1.08  | 0.3597 | 1.22  | 0.0008 | -1.16 | 0.2042 |
| 97844_at   | 1419248_at   | Rgs2            | regulator of G-protein signaling 2             | 1.39  | 0.37 | 1.81  | 0.2084 | -1.02 | 0.9393 | 1.88  | 0.1628 | 1.41  | 0.2062 |
| 97845_at   | 1416581_at   | Wdr5            | WD repeat domain 5                             | -1.48 | 0.28 | -1.23 | 0.0313 | 1.15  | 0.0364 | -1.31 | 0.0062 | -1.67 | 0.1247 |
| 97846_at   | 1460429_at   | Cdc5l           | cell division cycle 5-like (S. pombe)          | 1.45  | 0.32 | -1.09 | 0.4082 | 1.22  | 0.0139 | -1.06 | 0.5414 | 1.23  | 0.1102 |
| 97847_at   | 1416354_at   | Rbmx            | RNA binding motif protein, X chromosome        | 1.3   | 0.3  | 1.01  | 0.9042 | -1.01 | 0.8511 | -1.04 | 0.706  | 1.51  | 0.0081 |
| 97848_at   | 1426863_at   | Rbmx            | RNA binding motif protein, X chromosome        | 1.68  | 0.12 | 1.38  | 0.0151 | 1.43  | 0.1706 | 1.61  | 0.0009 | 1.03  | 0.9536 |
| 97853_at   | 1417166_at   | Psip1           | PC4 and SFRS1 interacting protein 1            | 1.49  | 0.24 | 1.14  | 0.1589 | 1.16  | 0.0615 | 1.06  | 0.6356 | -1.13 | 0.4131 |
| 97857_at   | 1423646_at   | Zdhhc3          | zinc finger, DHHC domain containing 3          | 1.51  | 0.21 | -1.23 | 0.0878 | 1.08  | 0.4851 | -1.08 | 0.4704 | -1.34 | 0.188  |
| 97859_at   | 1433605_at   | Inpp5a          | inositol polyphosphate-5-phosphatase A         | 1.37  | 0.04 | -1.11 | 0.2958 | 1.15  | 0.0385 | -1.14 | 0.3149 | -1.32 | 0.3251 |
| 97862_s_at | 1451145_s_at | 0610039A15Rik   | RIKEN cDNA 0610039A15 gene                     | 1.42  | 0.07 | 1.01  | 0.9301 | 1.02  | 0.7429 | -1    | 0.9612 | -1.19 | 0.4469 |
| 97863_at   | 1450868_at   | D8ErtD354e      | DNA segment, Chr 8, ERATO Doi 354, expr        | 1.06  | 0.69 | 1.16  | 0.0758 | 1.24  | 0.0049 | 1.29  | 0      | 1.36  | 0.0125 |
| 97866_at   | 1423217_a_at | 2510049I19Rik   | RIKEN cDNA 2510049I19 gene                     | -1.02 | 0.92 | -1.1  | 0.1943 | -1.06 | 0.6781 | -1.11 | 0.0656 | 1.09  | 0.5204 |
| 97867_at   | 1449038_at   | ---             | ---                                            | 1.16  | 0.21 | 1.16  | 0.0156 | 1.11  | 0.0373 | 1.08  | 0.1876 | 1.28  | 0.0193 |
| 97868_at   | 1449935_a_at | Dnaja3          | DnaJ (Hsp40) homolog, subfamily A, membe       | -1.02 | 0.81 | 1.34  | 0.0002 | 1.2   | 0.0365 | 1.36  | 0      | -1.04 | 0.6843 |
| 97869_at   | 1451084_at   | Etfhd           | electron transferring flavoprotein, dehydroge  | 1.45  | 0.11 | 1.19  | 0.0481 | 1.24  | 0.0881 | 1.28  | 0.0246 | -1.22 | 0.3148 |
| 97871_at   | 1449324_at   | Ero11 /// LOC43 | ERO1-like (S. cerevisiae) /// hypothetical gei | -1.12 | 0.43 | 1.09  | 0.2489 | 1.14  | 0.0119 | 1.16  | 0.0221 | 1.22  | 0.0419 |
| 97875_at   | 1419263_a_at | Adrm1           | adhesion regulating molecule 1                 | 1.39  | 0.06 | -1.08 | 0.2455 | 1.08  | 0.1703 | 1.06  | 0.4316 | -1.1  | 0.5735 |
| 97876_at   | 1417660_s_at | Vps29           | vacuolar protein sorting 29 (S. pombe)         | 1.25  | 0.15 | 1.14  | 0.066  | 1.04  | 0.7476 | 1.09  | 0.1004 | 1.09  | 0.3866 |
| 97880_at   | 1423710_at   | Dlst            | dihydrolipoamide S-succinyltransferase (E2     | 1.62  | 0.02 | 1.16  | 0.0969 | -1.01 | 0.9461 | 1     | 0.9869 | -1.71 | 0.0096 |
| 97882_at   | 1448242_at   | Sec61a1         | Sec61 alpha 1 subunit (S. cerevisiae)          | -1.04 | 0.81 | -1.13 | 0.0302 | -1.02 | 0.84   | -1.1  | 0.0347 | -1.19 | 0.1471 |
| 97884_at   | 1460195_at   | Mrps11          | mitochondrial ribosomal protein S11            | 1.53  | 0.23 | 1.07  | 0.2764 | 1.02  | 0.8116 | 1.04  | 0.6307 | -1.3  | 0.1216 |

|            |              |               |                                              |       |      |       |        |       |        |       |        |        |        |
|------------|--------------|---------------|----------------------------------------------|-------|------|-------|--------|-------|--------|-------|--------|--------|--------|
| 97885_at   | 1418004_a_at | 1810009M01Rik | RIKEN cDNA 1810009M01 gene                   | 1.28  | 0.3  | 1.48  | 0.0009 | 1.03  | 0.3168 | 1.49  | 0.0136 | 1.07   | 0.6181 |
| 97886_at   | 1432372_a_at | Spr           | sepiapterin reductase                        | 1.56  | 0.09 | -1.04 | 0.4629 | -1.21 | 0.1731 | -1.1  | 0.3864 | -1.05  | 0.6239 |
| 97887_at   | 1418069_at   | Apoc2         | apolipoprotein C-II                          | 1.37  | 0.18 | 1.45  | 0      | 1.32  | 0.0279 | 1.9   | 0      | -1.27  | 0.1601 |
| 97888_at   | 1424616_s_at | ---           | ---                                          | 2.67  | 0.07 | 1.15  | 0.2064 | -1.47 | 0.0043 | 1.28  | 0.0072 | -1.23  | 0.2196 |
| 97889_at   | 1418438_at   | Fabp2         | fatty acid binding protein 2, intestinal     | -2.76 | 0.03 | -1.92 | 0      | -1.18 | 0.2222 | -2.06 | 0      | -14.57 | 0      |
| 97890_at   | 1416041_at   | Sgk           | serum/glucocorticoid regulated kinase        | 2.32  | 0.08 | 1.3   | 0.0633 | 1.33  | 0.0494 | 1.57  | 0.0023 | 2.69   | 0.0316 |
| 97891_at   | 1417035_at   | Sac3d1        | SAC3 domain containing 1                     | 1.24  | 0.5  | 1.03  | 0.7587 | -1.08 | 0.3865 | -1.05 | 0.5909 | 1.56   | 0.2213 |
| 97892_at   | 1451137_a_at | Brd8          | bromodomain containing 8                     | 1.35  | 0.34 | 1.28  | 0.1033 | 1.48  | 0.0007 | 1.36  | 0.0061 | 1.75   | 0.0027 |
| 97893_at   | 1431415_a_at | Tbpl1         | TATA box binding protein-like 1              | 1.39  | 0.53 | 1.49  | 0.0009 | 1.7   | 0.1007 | 1.41  | 0.0001 | 1.23   | 0.6521 |
| 97894_at   | 1448472_at   | Vars2         | valyl-tRNA synthetase 2                      | -1.02 | 0.94 | -1.32 | 0.0045 | -1.01 | 0.9331 | 1.13  | 0.3945 | -1.16  | 0.4573 |
| 97896_r_at | 1428061_at   | Hat1          | histone aminotransferase 1                   | 1.76  | 0.01 | 1.3   | 0.1228 | 1.07  | 0.6499 | 1.49  | 0.0148 | 1.62   | 0.1849 |
| 97897_at   | 1433476_at   | C78339        | expressed sequence C78339                    | 1.16  | 0.56 | 1.02  | 0.5984 | -1.06 | 0.3966 | 1.05  | 0.3871 | 1.05   | 0.6886 |
| 97901_at   | 1453097_a_at | Ubtf          | upstream binding transcription factor, RNA p | 1.06  | 0.84 | 1.29  | 0      | 1.23  | 0      | 1.27  | 0.0183 | 1.1    | 0.7987 |
| 97903_at   | 1431593_a_at | Leng5         | leukocyte receptor cluster (LRC) member 5    | 1.05  | 0.88 | -1.12 | 0.123  | -1.15 | 0.1518 | -1.17 | 0.0306 | -1.24  | 0.3299 |
| 97904_at   | 1452051_at   | Actr3         | ARP3 actin-related protein 3 homolog (yeas   | -1.24 | 0.26 | 1.08  | 0.4016 | 1.08  | 0.492  | 1.25  | 0.0893 | 1.09   | 0.3718 |
| 97906_at   | 1448170_at   | Siah2         | seven in absentia 2                          | -1.57 | 0.04 | 1.01  | 0.934  | 1.16  | 0.0441 | -1.13 | 0.0766 | 1.27   | 0.0045 |
| 97907_at   | 1417313_at   | Lsm7          | LSM7 homolog, U6 small nuclear RNA asso      | 2.29  | 0.03 | 1.09  | 0.1978 | -1.03 | 0.8259 | 1.02  | 0.7493 | -1.09  | 0.6987 |
| 97908_at   | 1426884_at   | 1110007A06Rik | RIKEN cDNA 1110007A06 gene                   | -1.08 | 0.6  | -1.12 | 0.0958 | 1.06  | 0.4713 | -1.11 | 0.1624 | -1.38  | 0.0196 |
| 97909_at   | 1415849_s_at | Stmn1         | stathmin 1                                   | 1.85  | 0.25 | 1.75  | 0.0188 | 1.25  | 0.1526 | 2.18  | 0.0023 | 1.65   | 0.2248 |
| 97911_at   | 1434214_at   | 0910001L09Rik | RIKEN cDNA 0910001L09 gene                   | 1.13  | 0.75 | -1.03 | 0.5837 | 1.08  | 0.1589 | -1.06 | 0.3813 | -1.41  | 0.0399 |
| 97912_at   | 1416009_at   | Tspan3        | tetraspanin 3                                | -1.03 | 0.96 | -1    | 0.9512 | 1.12  | 0.2013 | 1.18  | 0.1777 | 1.12   | 0.7158 |
| 97914_at   | 1418503_at   | Hspa9a        | heat shock protein 9A                        | 1.55  | 0.08 | 1.19  | 0.0011 | 1.48  | 0.0003 | 1.36  | 0.0003 | 1.46   | 0.0291 |
| 97915_at   | 1460341_at   | Plekhb2       | pleckstrin homology domain containing, fam   | 1.4   | 0.13 | -1.22 | 0.2326 | -1.04 | 0.7679 | -1.15 | 0.3779 | 1.1    | 0.8165 |
| 97916_at   | 1452773_at   | 5730494N06Rik | RIKEN cDNA 5730494N06 gene                   | 1.24  | 0    | 1.04  | 0.6268 | -1.13 | 0.1842 | -1.16 | 0.0507 | 1.08   | 0.4575 |
| 97917_at   | 1422614_s_at | Bloc1s1       | biogenesis of lysosome-related organelles c  | 1.36  | 0.2  | 1.08  | 0.0634 | -1.12 | 0.0242 | 1.07  | 0.2574 | 1.07   | 0.3713 |
| 97918_at   | 1427243_at   | AA536743      | expressed sequence AA536743                  | 1.31  | 0.06 | 1.15  | 0.0903 | -1.16 | 0.0606 | 1.2   | 0.002  | 1.44   | 0.0439 |
| 97919_at   | 1452869_at   | 1110021E09Rik | RIKEN cDNA 1110021E09 gene                   | -1.26 | 0    | 1     | 0.971  | 1.04  | 0.689  | -1.01 | 0.8279 | -1.16  | 0.213  |
| 97920_at   | 1423952_a_at | Krt2-7        | keratin complex 2, basic, gene 7             | 2.31  | 0.18 | 1.05  | 0.756  | -1.06 | 0.7155 | 1.05  | 0.7034 | 1.19   | 0.5507 |
| 97921_at   | 1426670_at   | Agrn          | agrin                                        | 1.12  | 0.47 | -1.08 | 0.2786 | -1.07 | 0.4874 | -1.03 | 0.7014 | 1.1    | 0.5247 |
| 97922_at   | 1426307_at   | ---           | ---                                          | 1.17  | 0.38 | -1.14 | 0.0829 | -1.1  | 0.139  | -1.12 | 0.0309 | -1.12  | 0.1252 |
| 97923_at   | 1434060_at   | Herc1         | hect (homologous to the E6-AP (UBE3A) ca     | 1.05  | 0.84 | 1.08  | 0.3864 | 1.26  | 0.0121 | 1.1   | 0.31   | 1.17   | 0.359  |
| 97924_at   | 1448810_at   | Gne           | glucosamine                                  | 1.15  | 0.08 | -1.17 | 0.0082 | 1.36  | 0.0318 | 1.1   | 0.1501 | -1.19  | 0.3954 |
| 97925_at   | 1417176_at   | Csnk1e        | casein kinase 1, epsilon                     | 1.02  | 0.93 | -1.35 | 0.4305 | -2.99 | 0.0076 | -1.27 | 0.508  | 1.55   | 0.0957 |
| 97926_s_at | 1420715_a_at | Pparg         | peroxisome proliferator activated receptor g | 6.19  | 0.01 | 1.65  | 0.0014 | 1.39  | 0.052  | 1.72  | 0.0002 | 2.68   | 0.0181 |
| 97927_at   | 1422572_at   | Rhog          | ras homolog gene family, member G            | -1.07 | 0.93 | 1.05  | 0.751  | -1.17 | 0.3947 | -1.05 | 0.7321 | 1.71   | 0.2187 |
| 97928_at   | 1454837_at   | Cln6          | ceroid-lipofuscinosis, neuronal 6            | 2.33  | 0.07 | 1.98  | 0.0005 | 2.47  | 0.0058 | 2.1   | 0.0019 | 5.66   | 0.0018 |
| 97930_f_at | 1451232_at   | Cd151         | CD151 antigen                                | -1.37 | 0.03 | -1.05 | 0.5069 | -1.16 | 0.0507 | -1.1  | 0.1711 | -1.46  | 0.011  |
| 97932_f_at | 1420921_at   | Cd151         | CD151 antigen                                | -1.21 | 0.03 | 1.07  | 0.038  | -1.05 | 0.2424 | -1    | 0.9695 | -1.16  | 0.1456 |
| 97933_at   | 1460695_a_at | 2300006M17Rik | RIKEN cDNA 2300006M17 gene                   | 1.05  | 0.81 | -1.12 | 0.2522 | 1.06  | 0.6846 | 1.01  | 0.9667 | 1.27   | 0.0139 |
| 97934_at   | 1423236_at   | Galnt1        | UDP-N-acetyl-alpha-D-galactosamine:polyp     | -1.15 | 0.34 | -1.01 | 0.7975 | 1.12  | 0.0246 | 1.11  | 0.1778 | -1.11  | 0.4926 |
| 97935_at   | 1428871_at   | 4121402D02Rik | RIKEN cDNA 4121402D02 gene                   | 1.08  | 0.46 | 1.22  | 0.0004 | 1.14  | 0.1106 | 1.2   | 0.0174 | 1.17   | 0.0166 |
| 97936_at   | 1435243_at   | 2810407L07Rik | RIKEN cDNA 2810407L07 gene                   | -1.06 | 0.88 | 1.06  | 0.4663 | 1.01  | 0.8701 | 1.11  | 0.2316 | 2.15   | 0.0631 |
| 97937_at   | 1451021_a_at | Klf5          | Kruppel-like factor 5                        | 1.97  | 0.22 | -1.32 | 0.2663 | 1.41  | 0.4419 | -1.12 | 0.6124 | 1.49   | 0.4531 |
| 97939_at   | 1451195_a_at | Txnrc1        | thioredoxin domain containing 1              | 1.25  | 0.21 | 1.23  | 0.0016 | 1.12  | 0.1461 | 1.33  | 0      | 1.36   | 0.1053 |
| 97940_at   | 1415848_at   | Csh1          | chorionic somatomammotropin hormone 1        | -2.07 | 0.28 | 1.56  | 0.196  | -1.05 | 0.8841 | 1.72  | 0.1387 | 1.34   | 0.0284 |
| 97943_at   | 1450429_at   | Capn6         | calpain 6                                    | -1.17 | 0.39 | 1.11  | 0.2839 | 1     | 0.9837 | -1    | 0.9518 | 1.41   | 0.1028 |
| 97944_f_at | 1452405_x_at | Tcra          | T-cell receptor alpha chain                  | -2.52 | 0    | -1.05 | 0.6092 | 1.1   | 0.2904 | -1.07 | 0.5021 | 1.18   | 0.1069 |
| 97945_at   | 1426168_a_at | Tcra          | T-cell receptor alpha chain                  | -1.61 | 0.41 | 3.43  | 0.0089 | 1.79  | 0.1397 | 2.01  | 0.1152 | 1.4    | 0.2316 |
| 97946_at   | 1417905_at   | Prlpf         | prolactin-like protein F                     | -1.59 | 0.18 | -1.42 | 0.2912 | -1.33 | 0.4592 | -1.22 | 0.5573 | -1.55  | 0.3398 |
| 97947_at   | 1428103_at   | ---           | ---                                          | 1.16  | 0.71 | 1.26  | 0.1041 | 1.24  | 0.1021 | 1.36  | 0.0603 | -1.16  | 0.5532 |
| 97948_at   | 1417850_at   | Rb1           | retinoblastoma 1                             | 1.8   | 0.16 | -1.22 | 0.0452 | -1.2  | 0.357  | -1.03 | 0.8242 | -2.12  | 0.0677 |
| 97949_at   | 1421855_at   | Fgl2          | fibrinogen-like protein 2                    | 1.51  | 0.35 | 2.27  | 0.1662 | -1.38 | 0.1382 | 2.92  | 0.1355 | 1.34   | 0.2451 |
| 97950_at   | 1451006_at   | ---           | ---                                          | 1.45  | 0.2  | 1.31  | 0.1836 | -1.05 | 0.6623 | 1.3   | 0.3716 | 1.17   | 0.1623 |

|            |              |             |                                                 |        |      |        |        |       |        |        |        |        |        |
|------------|--------------|-------------|-------------------------------------------------|--------|------|--------|--------|-------|--------|--------|--------|--------|--------|
| 97954_at   | 1415861_at   | Tyrp1       | tyrosinase-related protein 1                    | -2.35  | 0.26 | 1.12   | 0.762  | -1.05 | 0.8177 | 1.04   | 0.8892 | -1.44  | 0.3966 |
| 97957_at   | 1424441_at   | Slc27a4     | solute carrier family 27 (fatty acid transporte | 1.27   | 0.52 | 1.06   | 0.6324 | -1.15 | 0.4863 | -1.63  | 0.0074 | -1.96  | 0.0574 |
| 97958_at   | 1426614_at   | Prkcbp1     | protein kinase C binding protein 1              | 1.46   | 0    | -1.11  | 0.3409 | -1.05 | 0.771  | -1.23  | 0.1928 | -2.28  | 0.3713 |
| 97960_at   | 1456043_at   | Usp22       | ubiquitin specific protease 22                  | -1.08  | 0.62 | 1.11   | 0.3923 | 1.18  | 0.2259 | -1.02  | 0.8114 | 1.17   | 0.5772 |
| 97962_at   | 1452344_at   | Synj2       | synaptojanin 2                                  | 1.24   | 0.6  | 1.01   | 0.9542 | -1.09 | 0.5784 | -1.11  | 0.5794 | -1.2   | 0.4928 |
| 97963_at   | 1416206_at   | Sipa1       | signal-induced proliferation associated gene    | 3.69   | 0.09 | 1      | 0.9992 | 1.08  | 0.7439 | 1.09   | 0.7682 | 2.31   | 0.1909 |
| 97964_at   | 1417267_s_at | Fkbp11      | FK506 binding protein 11                        | -1.09  | 0.69 | -1.05  | 0.8474 | 1.42  | 0.0469 | 1.18   | 0.4341 | -2.06  | 0.0339 |
| 97965_at   | 1422147_a_at | Pla2g6      | phospholipase A2, group VI                      | 4.14   | 0.01 | 1.05   | 0.6432 | -1.47 | 0.0338 | 1.04   | 0.7321 | -1.7   | 0.4926 |
| 97966_at   | 1424055_at   | Ncoa5       | nuclear receptor coactivator 5                  | -1.4   | 0.1  | -1.12  | 0.1611 | -1.01 | 0.8961 | -1.09  | 0.1089 | 1.13   | 0.6389 |
| 97970_at   | 1419755_at   | Mfi2        | antigen p97 (melanoma associated) identifie     | -1.96  | 0.01 | 1.34   | 0.1836 | 1.5   | 0.0594 | 1.29   | 0.092  | 1.79   | 0.1311 |
| 97971_at   | 1428511_at   | Phkg2       | phosphorylase kinase, gamma 2 (testis)          | 1.37   | 0.13 | 1.08   | 0.241  | -1    | 0.9693 | 1.15   | 0.1038 | 1.04   | 0.8214 |
| 97972_at   | 1448434_at   | Rnf103      | ring finger protein 103                         | -1.11  | 0.41 | -1.28  | 0.0344 | -1.11 | 0.4341 | -1.28  | 0.0302 | -1.6   | 0.0016 |
| 97973_at   | 1449389_at   | Tal1        | T-cell acute lymphocytic leukemia 1             | 1.27   | 0.68 | 1.38   | 0.0179 | 1.51  | 0.0901 | 1.06   | 0.7103 | 1.1    | 0.3982 |
| 97974_at   | 1451046_at   | Zfpm1       | zinc finger protein, multitype 1                | -1.4   | 0.07 | 1.06   | 0.4188 | 1.13  | 0.1623 | -1.04  | 0.4831 | 1.49   | 0.0269 |
| 97975_at   | 1452497_a_at | Nfatc3      | nuclear factor of activated T-cells, cytoplasr  | -1.12  | 0.77 | 1.07   | 0.552  | -1.3  | 0.0662 | -1.36  | 0.0194 | -1     | 0.9854 |
| 97976_at   | 1455434_a_at | Ktn1        | kinectin 1                                      | -1.39  | 0.3  | -1.02  | 0.8478 | 1.02  | 0.889  | -1.1   | 0.2155 | -1.18  | 0.2932 |
| 97977_at   | 1454974_at   | Ntn1        | netrin 1                                        | -1.11  | 0.55 | 1.01   | 0.9464 | 1.09  | 0.1336 | -1.14  | 0.1543 | 1.21   | 0.0285 |
| 97979_at   | 1417919_at   | Ppp1r7      | protein phosphatase 1, regulatory (inhibitor)   | 2.24   | 0.01 | 1.07   | 0.4174 | 1.03  | 0.6914 | 1.13   | 0.0335 | 1.03   | 0.9426 |
| 97980_at   | 1416435_at   | Ltbr        | lymphotoxin B receptor                          | -2.01  | 0.01 | -1.84  | 0      | -1.37 | 0.0012 | -1.72  | 0      | -2.71  | 0.0059 |
| 97982_at   | 1425310_a_at | Emid2       | EMI domain containing 2                         | -1.85  | 0    | -1.12  | 0.2683 | -1    | 0.9637 | -1.08  | 0.5185 | 1.31   | 0.1018 |
| 97983_s_at | 1420505_a_at | Stxbp1      | syntaxin binding protein 1                      | 1.41   | 0.45 | 1.17   | 0.1794 | -1.04 | 0.6216 | 1.18   | 0.1824 | 1.39   | 0.032  |
| 97985_f_at | 1428881_at   | Kns2        | kinesin 2                                       | -1.53  | 0.03 | 1.08   | 0.3659 | 1.1   | 0.1652 | 1.04   | 0.531  | 1.12   | 0.4122 |
| 97986_at   | 1418259_a_at | Entpd2      | ectonucleoside triphosphate diphosphohydr       | -1.81  | 0.05 | 1.03   | 0.885  | 1.22  | 0.329  | -1     | 0.9918 | 1.09   | 0.5993 |
| 97987_at   | 1422826_at   | Igfals      | insulin-like growth factor binding protein, aci | -21.66 | 0    | -11.92 | 0      | -1.66 | 0      | -61.92 | 0      | -35.03 | 0      |
| 97990_at   | 1448962_at   | Myh11       | myosin, heavy polypeptide 11, smooth musc       | 1.29   | 0.42 | -1.25  | 0.6125 | 1.06  | 0.9002 | -1.05  | 0.9152 | -2.85  | 0.14   |
| 97991_at   | 1451979_at   | Kras2       | V-Ki-ras2 Kirsten rat sarcoma viral oncogen     | 1.47   | 0.34 | 1.15   | 0.0139 | 1.09  | 0.3121 | 1.28   | 0.0021 | -1.25  | 0.3203 |
| 97992_at   | 1434546_at   | BC024683    | cDNA sequence BC024683                          | -1.06  | 0.43 | 1.07   | 0.7795 | 1.46  | 0.2594 | -1.17  | 0.2485 | 1.14   | 0.0748 |
| 97993_at   | 1423482_at   | Uros        | uroporphyrinogen III synthase                   | 1.07   | 0.68 | -1.44  | 0      | -1.3  | 0      | -1.49  | 0      | -1.39  | 0.0141 |
| 97994_at   | 1433471_at   | Tcf7        | transcription factor 7, T-cell specific         | 1.72   | 0.12 | -1.07  | 0.4035 | 1.27  | 0.0375 | 1.05   | 0.5012 | 1.8    | 0.0304 |
| 97995_at   | 1450461_at   | Tcf7        | transcription factor 7, T-cell specific         | -1.6   | 0.11 | -1.16  | 0.0998 | 1.1   | 0.2341 | -1.13  | 0.2221 | 1.12   | 0.5069 |
| 97996_at   | 1424217_at   | Papola      | poly (A) polymerase alpha                       | -1.25  | 0.56 | -1.06  | 0.5729 | -1.18 | 0.2777 | -1.26  | 0.0404 | 1      | 0.9872 |
| 97997_at   | 1448395_at   | Sfrp1       | secreted frizzled-related sequence protein 1    | -1.34  | 0.33 | -1.13  | 0.4872 | 1.02  | 0.8812 | 1.02   | 0.871  | 1.89   | 0.0257 |
| 97998_at   | 1421149_a_at | Drpla       | dentatorubral pallidoluyasian atrophy           | 1      | 1    | 1.05   | 0.6467 | 1.11  | 0.3531 | 1.09   | 0.2659 | -1.17  | 0.4809 |
| 98000_at   | 1419387_s_at | Ly64        | lymphocyte antigen 64                           | -2.47  | 0.21 | 1.13   | 0.6354 | -1.03 | 0.8977 | -1.25  | 0.3336 | 1.9    | 0.2011 |
| 98001_at   | 1421164_a_at | Arhgef1     | Rho guanine nucleotide exchange factor (GI      | 1.8    | 0.25 | 1.14   | 0.2706 | 1.06  | 0.7578 | 1.13   | 0.3813 | 1.11   | 0.7643 |
| 98002_at   | 1416714_at   | Icbsp1      | interferon consensus sequence binding prot      | 1.25   | 0.19 | 1.37   | 0.2444 | -1.1  | 0.2053 | 1.51   | 0.1563 | 1.28   | 0.1884 |
| 98003_at   | 1424302_at   | Pirb        | paired-Ig-like receptor B                       | 1.35   | 0.23 | 1.18   | 0.4837 | -1.02 | 0.8129 | 1.56   | 0.2161 | 1.33   | 0.0246 |
| 98004_at   | 1420858_at   | Pkia        | protein kinase inhibitor, alpha                 | -1.25  | 0.43 | -1.75  | 0.0435 | -1.61 | 0.0954 | -1.45  | 0.1082 | 1.49   | 0.4697 |
| 98005_at   | 1420859_at   | Pkia        | protein kinase inhibitor, alpha                 | -1.16  | 0.77 | -1.07  | 0.7497 | 1.5   | 0.124  | -1.15  | 0.4283 | 1.79   | 0.2412 |
| 98006_at   | 1448369_at   | Pola2       | polymerase (DNA directed), alpha 2              | 2.24   | 0.08 | 1.19   | 0.0328 | 1.01  | 0.9401 | 1.11   | 0.1231 | 1.17   | 0.6841 |
| 98007_at   | 1417542_at   | Rps6ka2     | ribosomal protein S6 kinase, polypeptide 2      | 3.5    | 0.02 | 1.53   | 0.0827 | 1.94  | 0.1214 | 2.3    | 0.0126 | -1.1   | 0.7731 |
| 98008_at   | 1415803_at   | Cx3cl1      | chemokine (C-X3-C motif) ligand 1               | -1.68  | 0.3  | -1     | 0.9888 | -1.18 | 0.5117 | -1.04  | 0.839  | -1.02  | 0.9593 |
| 98010_at   | 1452001_at   | Nfe2        | nuclear factor, erythroid derived 2             | 1.14   | 0.33 | -1.02  | 0.9247 | 1.05  | 0.6532 | -1.1   | 0.3668 | 1.16   | 0.5564 |
| 98011_at   | 1455021_at   | Gabbr1      | gamma-aminobutyric acid (GABA-B) receptc        | -1.38  | 0.13 | 1.59   | 0.0859 | 1.16  | 0.5317 | 1.21   | 0.3827 | 1.38   | 0.2977 |
| 98013_at   | 1454705_at   | D15Erd621e  | DNA segment, Chr 15, ERATO Doi 621, exp         | 1.45   | 0.17 | 1.18   | 0.1226 | 1.24  | 0.0287 | 1.46   | 0.0054 | 1.09   | 0.5262 |
| 98014_at   | 1417973_at   | lth1        | inter-alpha trypsin inhibitor, heavy chain 1    | -1.52  | 0.08 | -1.48  | 0.0001 | -1.02 | 0.7925 | -1.79  | 0      | -2.57  | 0      |
| 98015_at   | 1416294_at   | Scamp3      | secretory carrier membrane protein 3            | -1.19  | 0.47 | 1.15   | 0.0391 | 1.03  | 0.7368 | 1.15   | 0.0433 | -1.26  | 0.2784 |
| 98016_at   | 1428310_at   | D3Wsu161e   | DNA segment, Chr 3, Wayne State Universi        | 1.96   | 0.07 | 1.04   | 0.7475 | -1.11 | 0.6493 | -1.08  | 0.6573 | -1.26  | 0.3299 |
| 98017_at   | 1434071_a_at | Pelo        | pelota homolog (Drosophila)                     | 2.1    | 0    | 1.01   | 0.9128 | 1.09  | 0.4968 | -1.3   | 0.0259 | -1.58  | 0.1201 |
| 98018_at   | 1420664_s_at | Procr       | protein C receptor, endothelial                 | -1.02  | 0.9  | 1.02   | 0.9517 | -1.04 | 0.8089 | 1.12   | 0.7639 | -1.13  | 0.835  |
| 98019_at   | 1418136_at   | Tgfb1i1     | transforming growth factor beta 1 induced tr    | -1.01  | 0.98 | 1.19   | 0.108  | -1.07 | 0.5705 | 1.02   | 0.8805 | 1.2    | 0.5709 |
| 98020_at   | 1448336_at   | Drg1        | developmentally regulated GTP binding prot      | 1.14   | 0.59 | -1.1   | 0.0123 | -1.1  | 0.0426 | -1.06  | 0.0555 | 1.23   | 0.2752 |
| 98021_at   | 1435057_x_at | MGI:1929022 | RNA polymerase I associated factor              | -1.37  | 0.17 | -1.15  | 0.1226 | 1.18  | 0.1858 | 1.02   | 0.8812 | -1.24  | 0.5169 |

|            |              |                |                                                  |       |      |       |        |       |        |       |        |       |        |
|------------|--------------|----------------|--------------------------------------------------|-------|------|-------|--------|-------|--------|-------|--------|-------|--------|
| 98022_at   | 1417180_at   | Pcsk7          | proprotein convertase subtilisin/kexin type 7    | -1.31 | 0.23 | -1.16 | 0.2096 | 1.11  | 0.2524 | -1.06 | 0.5625 | 1.23  | 0.3964 |
| 98023_r_at | 1460217_at   | Plfr           | proliferin related protein                       | -3.85 | 0.22 | 1.02  | 0.8708 | 1.93  | 0.0725 | 1.29  | 0.1907 | 2.54  | 0.0006 |
| 98024_at   | 1419266_at   | Nfyb           | nuclear transcription factor-Y beta              | 1.18  | 0.22 | 1.18  | 0.0241 | 1.07  | 0.4547 | 1.09  | 0.1157 | -1.16 | 0.198  |
| 98026_g_at | 1450241_a_at | Evi2a          | ecotropic viral integration site 2a              | 1.67  | 0.16 | 1.26  | 0.5003 | -1.17 | 0.3446 | 1.37  | 0.4163 | -1.13 | 0.6978 |
| 98027_at   | 1450673_at   | Col9a2         | procollagen, type IX, alpha 2                    | -1.17 | 0.3  | -1.09 | 0.174  | -1.02 | 0.833  | -1.13 | 0.2695 | 1.58  | 0.0279 |
| 98028_at   | 1418733_at   | Twist1         | twist gene homolog 1 (Drosophila)                | -1.08 | 0.76 | 1.56  | 0.3098 | 1.33  | 0.499  | 1.04  | 0.8719 | 1.68  | 0.4121 |
| 98029_at   | 1434658_at   | 3110056O03Rik  | RIKEN cDNA 3110056O03 gene                       | 1.31  | 0.19 | -1.13 | 0.1906 | -1.21 | 0.0797 | -1.32 | 0.0206 | 1.26  | 0.6787 |
| 98030_at   | 1451860_a_at | Trim30         | tripartite motif protein 30                      | 1.81  | 0.09 | 1.78  | 0.0677 | 1.5   | 0.2094 | 2.35  | 0.0399 | 1.15  | 0.7122 |
| 98031_at   | 1417040_a_at | Bok            | Bcl-2-related ovarian killer protein             | -1.34 | 0.1  | 1.14  | 0.2048 | 1.05  | 0.6791 | 1.25  | 0.0907 | 1.31  | 0.0303 |
| 98032_at   | 1417778_at   | Zfp35          | zinc finger protein 35                           | 2.19  | 0.26 | 1.31  | 0.2374 | 1.35  | 0.1676 | 1.26  | 0.3127 | -1.17 | 0.4679 |
| 98033_at   | 1448786_at   | 1100001H23Rik  | RIKEN cDNA 1100001H23 gene                       | 1.31  | 0.01 | -1.7  | 0.0001 | 1.08  | 0.1909 | -1.46 | 0.0085 | -2.97 | 0.0006 |
| 98035_g_at | 1449580_s_at | H2-DMb1 /// H2 | histocompatibility 2, class II, locus Mb1 /// hi | 1.22  | 0.52 | 2.46  | 0.199  | -1.54 | 0.0775 | 2.37  | 0.2408 | 1.28  | 0.4892 |
| 98036_at   | 1433538_at   | Marveld1       | MARVEL (membrane-associating) domain c           | 1.11  | 0.57 | -1.16 | 0.2086 | 1.04  | 0.5812 | -1.1  | 0.193  | -1.12 | 0.653  |
| 98037_at   | 1415759_a_at | Hbxip          | hepatitis B virus x interacting protein          | 1.09  | 0.71 | 1.01  | 0.8668 | 1.13  | 0.1232 | 1.09  | 0.1482 | -1.11 | 0.2867 |
| 98038_at   | 1416155_at   | Hmgb3          | high mobility group box 3                        | 1.1   | 0.55 | -1.16 | 0.0855 | 1.07  | 0.2421 | -1.13 | 0.0574 | -1.76 | 0.0014 |
| 98039_at   | 1427909_at   | 2410015M20Rik  | RIKEN cDNA 2410015M20 gene                       | 1.28  | 0.07 | 1.14  | 0.0565 | 1.04  | 0.5739 | 1.25  | 0.0107 | -1.07 | 0.3407 |
| 98042_at   | 1426555_at   | Scpep1         | serine carboxypeptidase 1                        | 1.17  | 0.63 | 1.45  | 0.037  | 1.04  | 0.8434 | 1.02  | 0.8979 | -1.08 | 0.6837 |
| 98045_s_at | 1420498_a_at | Dab2           | disabled homolog 2 (Drosophila)                  | -1.02 | 0.96 | -1.05 | 0.7347 | 1.22  | 0.216  | -1.06 | 0.6205 | 1.63  | 0.1756 |
| 98047_at   | 1454616_at   | 5730410I19Rik  | RIKEN cDNA 5730410I19 gene                       | 1.05  | 0.85 | 1.12  | 0.0524 | 1.18  | 0.0054 | 1.09  | 0.3278 | -1.13 | 0.2376 |
| 98048_at   | 1423982_at   | Fusip1         | FUS interacting protein (serine-arginine rich)   | 1.02  | 0.97 | 1.84  | 0.0058 | 1.48  | 0.2051 | 2.16  | 0.0006 | -1.76 | 0.27   |
| 98049_at   | 1423681_at   | 1300018I05Rik  | RIKEN cDNA 1300018I05 gene /// mKIAA06           | -1.13 | 0.54 | -1.11 | 0.1662 | 1.01  | 0.8378 | -1.06 | 0.4543 | -1.17 | 0.3406 |
| 98051_at   | 1424819_a_at | Al114950       | expressed sequence Al114950                      | 1.27  | 0.26 | 1.05  | 0.5077 | 1.13  | 0.0572 | 1.14  | 0.0668 | 1.13  | 0.0938 |
| 98052_at   | 1453570_x_at | Bet1l          | blocked early in transport 1 homolog (S. cere    | 1.6   | 0.05 | 1.11  | 0.2081 | 1.04  | 0.6336 | 1.09  | 0.297  | -1.23 | 0.3235 |
| 98053_at   | 1455815_a_at | Ywhab          | tyrosine 3-monooxygenase/tryptophan 5-mo         | -1.25 | 0.12 | -1.74 | 0      | -1.47 | 0.0083 | -1.75 | 0.0001 | 1.01  | 0.9487 |
| 98055_at   | 1420631_a_at | Blicap         | bladder cancer associated protein homolog        | -1.53 | 0.03 | 1.01  | 0.9656 | -1.03 | 0.8511 | -1.11 | 0.4621 | -1.42 | 0.0799 |
| 98056_at   | 1449002_at   | Phlda3         | pleckstrin homology-like domain, family A, r     | -1.28 | 0.15 | 1.03  | 0.8513 | -1.03 | 0.8622 | 1.24  | 0.3033 | 1.28  | 0.1052 |
| 98057_at   | 1436906_at   | Rnf166         | ring finger protein 166                          | 1.25  | 0.5  | 1.13  | 0.1257 | 1.31  | 0.0022 | 1.15  | 0.1136 | 1.19  | 0.1781 |
| 98059_s_at | 1421654_a_at | Lmna           | lamin A                                          | 1.31  | 0.19 | 1     | 0.9474 | -1.05 | 0.6983 | 1.07  | 0.5016 | -1.31 | 0.3433 |
| 98060_at   | 1425472_a_at | Lmna           | lamin A                                          | 1.05  | 0.73 | -1.02 | 0.8531 | 1.09  | 0.1679 | 1     | 0.9664 | 1.03  | 0.826  |
| 98061_at   | 1428049_a_at | 1110001K21Rik  | RIKEN cDNA 1110001K21 gene                       | -1.05 | 0.85 | -1.2  | 0.0378 | -1.06 | 0.449  | -1.2  | 0.033  | -1.04 | 0.6768 |
| 98063_at   | 1424825_a_at | Glycam1        | glycosylation dependent cell adhesion molec      | -2.59 | 0.13 | 2.38  | 0.4402 | -1.15 | 0.6357 | -1.19 | 0.5053 | 2.32  | 0.0862 |
| 98064_at   | 1454754_a_at | Aamp           | angio-associated migratory protein               | -1.25 | 0.61 | 1.07  | 0.1752 | 1.07  | 0.6233 | 1.02  | 0.7115 | -1.06 | 0.7996 |
| 98066_r_at | 1423502_at   | Brd2           | bromodomain containing 2                         | -1.6  | 0    | -1.03 | 0.8772 | 1.17  | 0.3125 | 1.21  | 0.2857 | -1.14 | 0.7648 |
| 98067_at   | 1421679_a_at | Cdkn1a         | cyclin-dependent kinase inhibitor 1A (P21)       | 1.11  | 0.7  | 1.3   | 0.2024 | -1.14 | 0.3744 | 1.36  | 0.2031 | 1.1   | 0.5365 |
| 98069_s_at | 1427897_s_at | 2400003N08Rik  | RIKEN cDNA 2400003N08 gene                       | -1.11 | 0.4  | -1.01 | 0.8885 | 1.05  | 0.3626 | -1.15 | 0.0863 | -1.06 | 0.341  |
| 98070_at   | 1427896_at   | 2400003N08Rik  | RIKEN cDNA 2400003N08 gene                       | -1.16 | 0.08 | -1.15 | 0.0344 | -1.08 | 0.1707 | -1.25 | 0.0003 | -1.15 | 0.0467 |
| 98072_r_at | 1449176_a_at | Dck            | deoxycytidine kinase                             | -1.11 | 0.48 | 1.2   | 0.4608 | -1.06 | 0.8329 | 1.4   | 0.1451 | -1.08 | 0.855  |
| 98073_at   | 1451435_at   | Cutl1          | cut-like 1 (Drosophila)                          | -1.18 | 0.45 | -1.1  | 0.0679 | 1.1   | 0.3027 | -1.08 | 0.2922 | -1.46 | 0.0812 |
| 98075_at   | 1416763_at   | G431001I09Rik  | RIKEN cDNA G431001I09 gene                       | 1.48  | 0.01 | 1.21  | 0.0007 | 1.03  | 0.5978 | 1.13  | 0.0424 | -1.08 | 0.5102 |
| 98076_at   | 1453634_a_at | Erp29          | endoplasmic reticulum protein 29                 | 1.09  | 0.52 | -1.04 | 0.7268 | -1.12 | 0.1489 | -1.01 | 0.9531 | -1.17 | 0.1347 |
| 98077_at   | 1422884_at   | Snrpd3         | small nuclear ribonucleoprotein D3               | 1.31  | 0.57 | 1.25  | 0.0926 | 1.02  | 0.8838 | 1.16  | 0.2952 | -1.11 | 0.7396 |
| 98078_at   | 1424979_at   | Aph1a          | anterior pharynx defective 1a homolog (C. e      | -1.77 | 0.14 | -1.19 | 0.0239 | -1.19 | 0.0054 | -1.3  | 0.0011 | 1.15  | 0.4473 |
| 98079_at   | 1450725_s_at | Car14          | carbonic anhydrase 14                            | -1.61 | 0.21 | -1.62 | 0.0008 | -1.44 | 0.0003 | -1.98 | 0      | -1.01 | 0.9369 |
| 98081_at   | 1451120_at   | Rpo1-3         | RNA polymerase 1-3                               | 1.76  | 0.12 | 1.06  | 0.5445 | -1.07 | 0.5512 | -1.02 | 0.7952 | 1.06  | 0.8571 |
| 98082_at   | 1448287_at   | Rpo1-3         | RNA polymerase 1-3                               | -1.91 | 0.23 | -1.23 | 0.5038 | -1.31 | 0.3869 | -1.13 | 0.6905 | 1.17  | 0.6602 |
| 98083_at   | 1433508_at   | Copeb          | Kruppel-like factor 6                            | 2.07  | 0.14 | 1.48  | 0.1008 | 1.46  | 0.0013 | 1.89  | 0.0251 | 2.06  | 0.0404 |
| 98084_at   | 1417112_at   | Arl2bp         | ADP-ribosylation factor-like 2 binding protei    | -1.12 | 0.57 | -1.16 | 0.0064 | -1.05 | 0.394  | -1.12 | 0.0583 | -1.08 | 0.6254 |
| 98085_f_at | 1454778_x_at | Rps28          | Ribosomal protein S28                            | -1.05 | 0.74 | -1.04 | 0.652  | -1    | 0.9789 | 1.17  | 0.1058 | 1.6   | 0.0053 |
| 98087_at   | 1460315_s_at | Tbk1           | TANK-binding kinase 1                            | -1.06 | 0.75 | 1.21  | 0.1116 | 1.18  | 0.1177 | 1.23  | 0.0506 | -1.34 | 0.0086 |
| 98088_at   | 1417268_at   | Cd14           | CD14 antigen                                     | -1.42 | 0.03 | 1.2   | 0.3278 | -1.07 | 0.381  | 1.45  | 0.1965 | 1.37  | 0.06   |
| 98092_at   | 1451335_at   | Plac8          | placenta-specific 8                              | 1.09  | 0.81 | 1.46  | 0.3843 | -1.06 | 0.7684 | 2.23  | 0.2197 | 1.06  | 0.7376 |
| 98097_r_at | 1451052_at   | 2610019N19Rik  | RIKEN cDNA 2610019N19 gene                       | 1.19  | 0.16 | -1    | 0.9791 | 1.06  | 0.454  | -1.06 | 0.4998 | -1.06 | 0.6577 |
| 98098_at   | 1416193_at   | Car1           | carbonic anhydrase 1                             | 1.25  | 0.33 | 1.39  | 0.1346 | 1.14  | 0.6143 | 1.12  | 0.6421 | 1.36  | 0.3309 |

|            |              |               |                                                |       |      |       |        |       |        |       |        |       |        |
|------------|--------------|---------------|------------------------------------------------|-------|------|-------|--------|-------|--------|-------|--------|-------|--------|
| 98102_at   | 1418560_at   | Pdha1         | pyruvate dehydrogenase E1 alpha 1              | 1.45  | 0.03 | 1.26  | 0.0264 | 1.31  | 0.0004 | 1.31  | 0.0043 | -1.44 | 0.1801 |
| 98104_at   | 1416769_s_at | Atp6v0b       | ATPase, H+ transporting, V0 subunit B          | 1.39  | 0.47 | -1.01 | 0.9321 | 1.12  | 0.3158 | -1.03 | 0.5654 | -1.14 | 0.4296 |
| 98106_at   | 1448801_a_at | Timm44        | translocator of inner mitochondrial membran    | 1.56  | 0    | 1.06  | 0.3495 | 1.09  | 0.5027 | 1.05  | 0.467  | 1.21  | 0.1025 |
| 98107_at   | 1449660_s_at | Coro1c        | coronin, actin binding protein 1C              | 1.23  | 0.14 | 1.06  | 0.4687 | 1.03  | 0.7612 | 1.03  | 0.6705 | -1.45 | 0.5083 |
| 98108_at   | 1448326_a_at | Crabp1        | cellular retinoic acid binding protein I       | 1.08  | 0.68 | 1.26  | 0.1398 | 1.19  | 0.269  | 1.27  | 0.0761 | 1.19  | 0.7069 |
| 98109_at   | 1429453_a_at | Mrpl55        | mitochondrial ribosomal protein L55            | 1.15  | 0.23 | 1.03  | 0.7647 | 1.01  | 0.9366 | 1.12  | 0.1746 | -1.28 | 0.3032 |
| 98111_at   | 1425993_a_at | Hsp105        | heat shock protein 105                         | 1.24  | 0.4  | -1.63 | 0.0088 | -1.09 | 0.556  | -1.98 | 0.0013 | 1.04  | 0.8509 |
| 98113_at   | 1448166_a_at | Psmb1         | proteasome (prosome, macropain) subunit, l     | 1.41  | 0.12 | 1.16  | 0.0522 | 1.2   | 0.0466 | 1.24  | 0.0089 | -1.03 | 0.769  |
| 98116_at   | 1423944_at   | Hpxn          | hemopexin                                      | -1.44 | 0.11 | 1.05  | 0.3992 | 1.05  | 0.3996 | 1.09  | 0.2544 | -1.15 | 0.0492 |
| 98118_at   | 1422241_a_at | Ndufa1        | NADH dehydrogenase (ubiquinone) 1 alpha        | 1.57  | 0.56 | -1.98 | 0.0278 | -1.13 | 0.6654 | -1.95 | 0.0287 | -1.12 | 0.812  |
| 98119_at   | 1418273_a_at | Rpl30         | ribosomal protein L30                          | 1.27  | 0.18 | 1.07  | 0.0076 | 1.14  | 0.0666 | 1.13  | 0.0002 | 1.5   | 0.0001 |
| 98120_at   | 1415690_at   | Mrpl27        | mitochondrial ribosomal protein L27            | 1.5   | 0    | 1.05  | 0.5386 | 1.01  | 0.9319 | 1.28  | 0.0054 | -1.11 | 0.3447 |
| 98121_at   | 1417465_at   | Fnta          | farnesyltransferase, CAAX box, alpha           | 1.44  | 0.06 | 1.06  | 0.5656 | 1.11  | 0.3025 | 1.15  | 0.1892 | 1.2   | 0.2685 |
| 98123_at   | 1418519_at   | Aadat         | aminoadipate aminotransferase                  | 1.32  | 0.13 | 1.03  | 0.6574 | -1.04 | 0.7365 | 1.11  | 0.2225 | -1.22 | 0.2645 |
| 98125_at   | 1423951_at   | 1110025I09Rik | RIKEN cDNA 1110025I09 gene                     | 1.27  | 0.27 | -1.25 | 0.0025 | -1.12 | 0.0682 | -1.14 | 0.0323 | -1.2  | 0.4092 |
| 98126_s_at | 1419312_at   | Atp2a1        | ATPase, Ca++ transporting, cardiac muscle,     | -1.02 | 0.94 | -2.95 | 0.1089 | -1.76 | 0.2998 | -2.66 | 0.1321 | 1.14  | 0.6002 |
| 98127_at   | 1423057_at   | Capza2        | capping protein (actin filament) muscle Z-link | -1.23 | 0.51 | 1.19  | 0.0022 | 1.16  | 0.2844 | 1.25  | 0.0284 | 1.07  | 0.6695 |
| 98128_at   | 1416143_at   | Atp5j         | ATP synthase, H+ transporting, mitochondri     | 1.09  | 0.69 | -1.03 | 0.6928 | -1    | 0.9959 | 1.02  | 0.8209 | -1.03 | 0.801  |
| 98129_at   | 1417219_s_at | Tmsb10        | thymosin, beta 10                              | 1.82  | 0.03 | 1.96  | 0.085  | 1.13  | 0.4308 | 1.98  | 0.0975 | 1.75  | 0.077  |
| 98130_at   | 1452782_a_at | Txn2          | thioredoxin 2                                  | 1.14  | 0.71 | 1.03  | 0.6408 | 1.09  | 0.2835 | 1.03  | 0.7    | 1.09  | 0.5789 |
| 98131_at   | 1451848_a_at | Cryz          | crystallin, zeta                               | 1.08  | 0.66 | 1.01  | 0.9229 | 1.01  | 0.8859 | -1.01 | 0.8583 | -1.36 | 0.0184 |
| 98132_at   | 1422484_at   | Cycs          | cytochrome c, somatic                          | 1.8   | 0.02 | 1.28  | 0.0862 | 1.38  | 0.0378 | 1.45  | 0.0011 | -1.86 | 0.002  |
| 98133_at   | 1417504_at   | Calb1         | calbindin-28K                                  | -1.03 | 0.93 | 1.02  | 0.8319 | 1.18  | 0.2508 | 1.5   | 0.1152 | -1.04 | 0.7986 |
| 98136_at   | 1421052_a_at | Sms           | spermine synthase                              | 1.91  | 0.09 | 1.07  | 0.3673 | -1.02 | 0.8927 | -1.03 | 0.8635 | 1.03  | 0.5906 |
| 98137_at   | 1419525_at   | Car5a         | carbonic anhydrase 5a, mitochondrial           | 1.44  | 0.12 | -1.33 | 0.0021 | -1.28 | 0.012  | -1.58 | 0.0002 | -1.44 | 0.2462 |
| 98138_at   | 1452049_at   | Rpl7l1        | ribosomal protein L7-like 1                    | 1.2   | 0.31 | 1.1   | 0.2824 | 1.09  | 0.4026 | 1.06  | 0.5494 | 1.1   | 0.4235 |
| 98140_at   | 1448261_at   | Cdh1          | cadherin 1                                     | -1.14 | 0.65 | -1.07 | 0.347  | -1.14 | 0.0281 | -1.11 | 0.0824 | 1.28  | 0.1017 |
| 98142_at   | 1434604_at   | Eif5b         | eukaryotic translation initiation factor 5B    | 1.41  | 0.41 | 1.36  | 0.0146 | 1.39  | 0.0521 | 1.37  | 0.0051 | 1.07  | 0.5378 |
| 98143_at   | 1460319_at   | Fut8          | fucosyltransferase 8                           | 1.11  | 0.76 | -1.61 | 0.0024 | -1.07 | 0.6151 | -2.1  | 0.0002 | -1.55 | 0.1389 |
| 98144_f_at | 1430029_a_at | Sas           | sarcoma amplified sequence                     | -1.45 | 0.04 | -1.04 | 0.6483 | -1.04 | 0.7963 | -1.13 | 0.2419 | -1.74 | 0.0021 |
| 98146_at   | 1428073_a_at | Nup88         | nucleoporin 88                                 | 1.89  | 0.05 | -1.02 | 0.7986 | 1.08  | 0.22   | 1.05  | 0.533  | 1.1   | 0.7047 |
| 98147_at   | 1448311_at   | Usp5          | ubiquitin specific protease 5 (isopeptidase T  | -1.2  | 0.3  | -1.04 | 0.5493 | -1.05 | 0.7454 | 1.01  | 0.9019 | 1.09  | 0.7562 |
| 98149_s_at | 1452730_at   | 1110033J19Rik | RIKEN cDNA 1110033J19 gene                     | -1.25 | 0.43 | -1.26 | 0.1491 | -1.02 | 0.8481 | 1.07  | 0.5474 | -1.83 | 0.0964 |
| 98150_at   | 1423448_at   | Rab11b        | RAB11B, member RAS oncogene family             | 1.01  | 0.97 | 1.15  | 0.0111 | 1.08  | 0.0995 | 1.2   | 0.0153 | 1.14  | 0.1941 |
| 98152_at   | 1422450_at   | Catns         | catenin src                                    | -1.4  | 0.02 | -1.06 | 0.3811 | -1.12 | 0.1547 | -1.12 | 0.0648 | 1.11  | 0.2298 |
| 98153_at   | 1459987_s_at | Cct3          | chaperonin subunit 3 (gamma)                   | 1.16  | 0.43 | -1.13 | 0.0929 | -1.02 | 0.7358 | -1.19 | 0.0111 | -1.16 | 0.1746 |
| 98154_at   | 1452781_a_at | Gtf3c2        | general transcription factor IIIC, polypeptide | 1.3   | 0.15 | 1.02  | 0.8259 | -1.15 | 0.1114 | 1.12  | 0.2298 | 1.2   | 0.3704 |
| 98155_r_at | 1448277_at   | Pold2         | polymerase (DNA directed), delta 2, regulat    | 1.37  | 0.47 | -1.34 | 0.2497 | 1.08  | 0.6855 | -1.61 | 0.0232 | 1.08  | 0.7792 |
| 98168_at   | 1422613_a_at | Rpl7a         | ribosomal protein L7a                          | 1.02  | 0.83 | 1.05  | 0.2863 | 1.1   | 0.0006 | 1.12  | 0.0132 | 1.33  | 0.0245 |
| 98169_s_at | 1449730_s_at | Fzd3          | frizzled homolog 3 (Drosophila)                | 1.22  | 0.18 | 1.18  | 0.1144 | 1.08  | 0.4957 | 1.09  | 0.4324 | 1.1   | 0.4495 |
| 98240_at   | 1418166_at   | ---           | ---                                            | 1.04  | 0.9  | 1.04  | 0.8663 | 1.07  | 0.7902 | 1.29  | 0.2947 | 1.25  | 0.4141 |
| 98245_at   | 1419935_s_at | Csnk2a2       | casein kinase II, alpha 2, polypeptide         | -3.02 | 0.12 | -1.09 | 0.2952 | -1.12 | 0.2855 | -1.34 | 0.0299 | 1.37  | 0.2355 |
| 98247_at   | 1420025_s_at | Aak1          | AP2 associated kinase 1                        | -1.37 | 0.35 | 1.16  | 0.2497 | 1.36  | 0.0236 | 1.31  | 0.0066 | 1.76  | 0.0353 |
| 98254_f_at | 1455316_x_at | Ccrn4l        | CCR4 carbon catabolite repression 4-like (S    | 1.11  | 0.64 | 1.63  | 0.0002 | 1.28  | 0.1272 | 1.71  | 0.0002 | 1.89  | 0.0015 |
| 98276_at   | 1420785_at   | Gab2          | growth factor receptor bound protein 2-asso    | -1.2  | 0.68 | 1.17  | 0.1749 | 1.23  | 0.0419 | 1.19  | 0.1942 | 1.26  | 0.4633 |
| 98277_at   | 1460664_at   | Zfp1a4        | zinc finger protein, subfamily 1A, 4 (Eos)     | -1.6  | 0.03 | -1.4  | 0.0074 | -1.16 | 0.2235 | -1.33 | 0.0298 | 1.23  | 0.2179 |
| 98278_at   | 1422020_at   | Spry4         | sprouty homolog 4 (Drosophila)                 | -1.45 | 0.01 | -1.04 | 0.7588 | -1.16 | 0.1931 | -1.16 | 0.2387 | 1.31  | 0.1222 |
| 98279_at   | 1420564_at   | Insrr         | insulin receptor-related receptor              | -2    | 0.08 | 1.34  | 0.2439 | -1.21 | 0.3934 | 1.03  | 0.9183 | 1.47  | 0.1761 |
| 98280_at   | 1422626_at   | Mmp16         | matrix metalloproteinase 16                    | -1.55 | 0.03 | 1.07  | 0.3879 | 1.18  | 0.1352 | -1    | 0.997  | 1.39  | 0.216  |
| 98281_at   | 1427794_at   | AJ242955      | hypothetical protein, P4(21)n gene             | -2.21 | 0.25 | 1.22  | 0.5052 | 1.62  | 0.2818 | -1.03 | 0.8651 | 1.47  | 0.4396 |
| 98283_at   | 1450308_a_at | Xrn1          | 5'-3' exoribonuclease 1                        | -1.24 | 0.15 | 1.01  | 0.9331 | -1.29 | 0.1026 | -1.11 | 0.516  | 4.53  | 0.0193 |
| 98284_f_at | 1460418_x_at | H2-T18        | histocompatibility 2, T region locus 18        | -1.54 | 0.08 | 1.12  | 0.4779 | -1.2  | 0.2582 | -1.05 | 0.7693 | -1.04 | 0.785  |
| 98285_at   | 1422135_at   | Zfp146        | zinc finger protein 146                        | 2.52  | 0.28 | -1.2  | 0.3382 | -1.2  | 0.4555 | -1.32 | 0.2465 | -1.15 | 0.7705 |

|            |              |                 |                                                 |       |      |        |        |       |        |       |        |        |        |
|------------|--------------|-----------------|-------------------------------------------------|-------|------|--------|--------|-------|--------|-------|--------|--------|--------|
| 98286_at   | 1450774_at   | Ly6g6d          | lymphocyte antigen 6 complex, locus G6D         | -1.42 | 0.65 | -1.92  | 0.1008 | -1.11 | 0.7643 | -1.18 | 0.6183 | -1.29  | 0.5054 |
| 98287_at   | 1451394_at   | Dpp6            | dipeptidylpeptidase 6                           | 1.49  | 0.24 | 1.17   | 0.5348 | 1.39  | 0.0888 | 1.3   | 0.1853 | 1.22   | 0.6637 |
| 98288_at   | 1420763_at   | Klk4            | kallikrein 4 (protease, enamel matrix, prosta   | -1.22 | 0.26 | -1.24  | 0.0539 | -1.16 | 0.1884 | -1.25 | 0.1053 | 1.68   | 0.1059 |
| 98289_at   | 1421337_at   | Elf4            | E74-like factor 4 (ets domain transcription fa  | 1.06  | 0.84 | 1.07   | 0.5915 | 1.04  | 0.7992 | -1.04 | 0.7432 | 1.53   | 0.0675 |
| 98290_at   | 1450360_at   | Plcg1           | phospholipase C, gamma 1                        | -1.14 | 0.54 | -1.18  | 0.0454 | -1.06 | 0.482  | -1.14 | 0.2379 | 1.09   | 0.441  |
| 98291_at   | 1421155_at   | B3galT6         | UDP-Gal:betaGal beta 1,3-galactosyltransfe      | 1.1   | 0.52 | -1.01  | 0.932  | 1.1   | 0.3732 | 1.01  | 0.9453 | -1.15  | 0.1699 |
| 98294_at   | 1419790_at   | ---             | ---                                             | -3.07 | 0.04 | 1.06   | 0.6145 | 1.17  | 0.1606 | -1.03 | 0.8364 | -1.29  | 0.2723 |
| 98295_at   | 1421363_at   | Cyp2c39         | cytochrome P450, family 2, subfamily c, poly    | -1.02 | 0.95 | 1.16   | 0.7376 | -1.32 | 0.5931 | 1.13  | 0.7762 | 3.17   | 0.0024 |
| 98296_at   | 1451582_at   | Tulp1           | tubby like protein 1                            | -1.73 | 0.21 | -1.11  | 0.2306 | 1.04  | 0.6112 | -1.18 | 0.02   | 1.27   | 0.2392 |
| 98297_at   | 1450988_at   | Gpr49           | G protein-coupled receptor 49                   | -1.22 | 0.69 | 2.47   | 0.0473 | -1.21 | 0.3837 | 1.49  | 0.388  | 1.25   | 0.4722 |
| 98298_at   | 1450502_at   | Dpysl2          | dihydropyrimidinase-like 2                      | -1.55 | 0.12 | -1.13  | 0.224  | -1.02 | 0.6827 | -1.15 | 0.0145 | -1.14  | 0.3986 |
| 98299_s_at | 1450322_s_at | Slnf3 /// Slnf4 | schlafen 3 /// schlafen 4                       | -1.15 | 0.89 | 1.89   | 0.297  | 1.29  | 0.4779 | 2.17  | 0.2636 | -1.7   | 0.1735 |
| 98300_at   | 1419225_at   | Cacna2d3        | calcium channel, voltage-dependent, alpha2      | -1.72 | 0.04 | -1.06  | 0.481  | 2.61  | 0.1845 | 1.07  | 0.5756 | 1.11   | 0.5981 |
| 98301_at   | 1430912_a_at | Tectb           | tectorin beta                                   | -1.15 | 0.75 | -1.84  | 0.1078 | -1.61 | 0.2053 | -1.99 | 0.0983 | 1.47   | 0.3526 |
| 98302_at   | 1450266_at   | Scn10a          | sodium channel, voltage-gated, type X, alph     | -1.45 | 0.55 | 1.16   | 0.5834 | 1.6   | 0.3224 | 1.3   | 0.345  | 3.44   | 0.1146 |
| 98303_at   | 1421004_at   | Cep1            | centrosomal protein 1                           | -2.38 | 0.19 | -1.14  | 0.4297 | -1.19 | 0.2462 | 1.06  | 0.5431 | -1.06  | 0.8718 |
| 98304_at   | 1421352_at   | Tlr6            | toll-like receptor 6                            | -1.14 | 0.56 | 1.29   | 0.3598 | 1.17  | 0.4613 | 1.76  | 0.1299 | 1.4    | 0.4572 |
| 98306_g_at | 1448834_at   | Foxm1           | forkhead box M1                                 | -1.63 | 0.01 | -1.16  | 0.1412 | 1.04  | 0.7353 | -1.29 | 0.0234 | 1.42   | 0.0992 |
| 98307_at   | 1421176_at   | Rasgrp1         | RAS guanyl releasing protein 1                  | -1.51 | 0.36 | 1.33   | 0.3113 | 1.04  | 0.8964 | -1.07 | 0.8482 | 1.6    | 0.1835 |
| 98308_at   | 1427868_x_at | Myh1            | myosin, heavy polypeptide 1, skeletal muscl     | -1.74 | 0.41 | -12.67 | 0.1847 | -6.42 | 0.222  | -8.91 | 0.2002 | -2.04  | 0.2111 |
| 98309_at   | 1422112_at   | Ccbp2           | chemokine binding protein 2                     | 1.05  | 0.75 | -1.75  | 0.0056 | -1.61 | 0.0199 | -1.65 | 0.0022 | 1.48   | 0.2137 |
| 98310_at   | 1449535_at   | Znrf4           | zinc and ring finger 4                          | -1.58 | 0.37 | -1.49  | 0.1376 | -1.22 | 0.4456 | 1.08  | 0.7712 | 1.41   | 0.4784 |
| 98311_at   | 1420737_at   | Pmfbp1          | polyamine modulated factor 1 binding protei     | -2.13 | 0.15 | 1.43   | 0.4474 | 1.54  | 0.3341 | 1.61  | 0.3204 | -1.56  | 0.4613 |
| 98312_at   | 1449319_at   | MGI:2183426     | thrombospondin type 1 domain containing g       | -1.06 | 0.91 | -1.11  | 0.5312 | 1.04  | 0.84   | 1.57  | 0.1525 | 2.63   | 0.259  |
| 98314_g_at | 1451888_a_at | Odz4            | odd Oz/ten-m homolog 4 (Drosophila)             | -1.3  | 0.57 | -1.06  | 0.7638 | 1.16  | 0.4393 | 1.16  | 0.4622 | 1.45   | 0.1902 |
| 98315_at   | 1419632_at   | Tecta           | tectorin alpha                                  | -3.16 | 0.05 | -1.26  | 0.0884 | -1.14 | 0.2763 | -1.3  | 0.0311 | 1.2    | 0.5081 |
| 98316_at   | 1427573_at   | Chic1           | cysteine-rich hydrophobic domain 1              | -1.95 | 0.01 | -1.07  | 0.8396 | -1.04 | 0.9293 | -1.93 | 0.1071 | 1.22   | 0.3013 |
| 98317_at   | 1422232_at   | Phox2b          | paired-like homeobox 2b                         | -1.48 | 0.45 | -1.41  | 0.2222 | -1.66 | 0.079  | -1.69 | 0.0802 | 1.11   | 0.794  |
| 98318_at   | 1449926_at   | Tnfsf7          | tumor necrosis factor (ligand) superfamily, r   | 1.37  | 0.3  | -1.87  | 0.0266 | -1.46 | 0.1102 | -1.08 | 0.7854 | 1.32   | 0.1513 |
| 98319_at   | 1460380_at   | Dsg2            | desmoglein 2                                    | -1.96 | 0.02 | -1.39  | 0.0324 | -1.36 | 0.0609 | -1.47 | 0.0086 | -1     | 0.9958 |
| 98320_at   | 1419430_at   | Cyp26a1         | cytochrome P450, family 26, subfamily a, pc     | 1.23  | 0.26 | 1.68   | 0.0705 | -3.38 | 0.0008 | 1.36  | 0.1583 | -1.41  | 0.255  |
| 98322_at   | 1421848_at   | Slc22a5         | solute carrier family 22 (organic cation transp | 1.55  | 0.33 | -1.24  | 0.0856 | -1.18 | 0.2045 | -1.19 | 0.2419 | 1.75   | 0.0575 |
| 98323_at   | 1421919_a_at | Ccr9            | chemokine (C-C motif) receptor 9                | -1.47 | 0.33 | 1.4    | 0.3198 | 1.14  | 0.7211 | 1.31  | 0.3949 | -1.01  | 0.9669 |
| 98324_at   | 1431900_a_at | Foxa3           | forkhead box A3                                 | 1.04  | 0.86 | 1.53   | 0.0033 | 1.64  | 0.0064 | 1.94  | 0      | 1.63   | 0.004  |
| 98325_at   | 1448098_at   | AA517545        | expressed sequence AA517545                     | -1.4  | 0.6  | 1.31   | 0.2229 | 1.46  | 0.1605 | 1.33  | 0.3781 | 1.85   | 0.2059 |
| 98326_f_at | 1419306_at   | 4921513E08Rik   | RIKEN cDNA 4921513E08 gene                      | -1.64 | 0.02 | -1.31  | 0.355  | -1.21 | 0.5648 | -1.59 | 0.14   | 1.24   | 0.4751 |
| 98327_at   | 1457308_at   | ---             | ---                                             | -1.29 | 0.27 | 1.06   | 0.6996 | 1.07  | 0.5623 | -1.11 | 0.3719 | 2.01   | 0.1872 |
| 98328_at   | 1421999_at   | Tshr            | thyroid stimulating hormone receptor            | -2.25 | 0.47 | -1.07  | 0.8551 | 1.17  | 0.6823 | -1.11 | 0.79   | 1.63   | 0.3314 |
| 98329_at   | 1422091_at   | Pfkfb2          | 6-phosphofructo-2-kinase/fructose-2,6-biphc     | -3.63 | 0.2  | 1.22   | 0.3912 | 1.03  | 0.8972 | 1.08  | 0.7464 | 2.16   | 0.1277 |
| 98330_at   | 1423424_at   | Zic3            | zinc finger protein of the cerebellum 3         | -1.26 | 0.58 | -1.11  | 0.4166 | 1.04  | 0.7141 | -1.33 | 0.0522 | -1.22  | 0.4166 |
| 98331_at   | 1427883_a_at | Col3a1          | procollagen, type III, alpha 1                  | -1.05 | 0.86 | 1.29   | 0.2918 | 1.03  | 0.8666 | 1.45  | 0.1888 | 1.12   | 0.3558 |
| 98333_at   | 1448739_x_at | Rps18           | ribosomal protein S18                           | -1.04 | 0.79 | -1.01  | 0.7941 | 1.08  | 0.0839 | 1.18  | 0.0082 | 1.54   | 0.0046 |
| 98334_at   | 1449903_at   | Crtam           | cytotoxic and regulatory T cell molecule        | 1.12  | 0.88 | 1.05   | 0.8691 | 1.25  | 0.3736 | 1.18  | 0.453  | 1.34   | 0.3386 |
| 98335_at   | 1418342_at   | Recc1           | replication factor C 1                          | 1.98  | 0.11 | 1.16   | 0.1919 | 1.11  | 0.2797 | 1.14  | 0.0401 | -1.14  | 0.3453 |
| 98336_s_at | 1451920_a_at | Recc1           | replication factor C 1                          | -1.41 | 0.1  | -1.02  | 0.8753 | -1    | 0.9984 | -1.01 | 0.972  | -1.13  | 0.6016 |
| 98337_at   | 1422049_at   | Nkx1-2          | NK1 transcription factor related, locus 2 (Drc  | -1.4  | 0.53 | -1.67  | 0.0486 | -1.28 | 0.2876 | -1.45 | 0.0594 | -1.09  | 0.6442 |
| 98338_at   | 1418868_at   | En2             | engrailed 2                                     | -1.42 | 0.36 | -1.12  | 0.3519 | -1.2  | 0.1909 | 1.11  | 0.5932 | 1.25   | 0.039  |
| 98339_at   | 1449264_at   | Syt11           | synaptotagmin 11                                | -2.11 | 0.18 | -1.25  | 0.4843 | -1.44 | 0.2699 | -1.63 | 0.0916 | -1.27  | 0.38   |
| 98342_at   | 1448157_s_at | Rpl10           | ribosomal protein 10                            | 1.13  | 0.43 | 1.01   | 0.6911 | 1.08  | 0.0206 | 1.03  | 0.2561 | 1.38   | 0.0008 |
| 98343_s_at | 1449978_at   | Zfy2            | zinc finger protein 2, Y linked                 | -1.17 | 0.87 | -1.03  | 0.9305 | -1.23 | 0.6051 | -1.26 | 0.486  | 2.02   | 0.3872 |
| 98345_at   | 1419895_at   | AA536748        | expressed sequence AA536748                     | 1.25  | 0.57 | 1.1    | 0.8293 | -1.26 | 0.5117 | 1.05  | 0.9203 | 4.76   | 0.0408 |
| 98346_at   | 1440230_at   | 9530051K01Rik   | RIKEN cDNA 9530051K01 gene                      | 1.58  | 0.38 | -1.39  | 0.0312 | -1.16 | 0.2316 | -1.4  | 0.0204 | -12.39 | 0.0014 |
| 98347_at   | 1421552_at   | Cdx4            | caudal type homeo box 4                         | -1.05 | 0.93 | -1.22  | 0.5932 | -1.52 | 0.1971 | -1.96 | 0.0393 | 3.05   | 0.0792 |



|            |              |              |                                                 |       |      |       |        |       |        |       |        |       |        |
|------------|--------------|--------------|-------------------------------------------------|-------|------|-------|--------|-------|--------|-------|--------|-------|--------|
| 98348_at   | 1421157_at   | Fzd3         | frizzled homolog 3 (Drosophila)                 | 1.15  | 0.73 | -1.33 | 0.0138 | -1.2  | 0.0894 | -1.21 | 0.1423 | -1.2  | 0.5736 |
| 98349_at   | 1421239_at   | Il6st        | interleukin 6 signal transducer                 | -1.13 | 0.74 | -1.37 | 0.0208 | -1.27 | 0.1124 | -1.36 | 0.0385 | -1.04 | 0.8815 |
| 98351_g_at | 1422256_at   | Sstr2        | somatostatin receptor 2                         | -1.1  | 0.78 | -1.42 | 0.2417 | -1.4  | 0.3318 | -1.03 | 0.92   | 2.25  | 0.0356 |
| 98354_at   | 1421760_at   | Ptcra        | pre T-cell antigen receptor alpha               | -1.76 | 0.4  | 1.05  | 0.8216 | 1.22  | 0.2345 | 1.09  | 0.6316 | 1.7   | 0.1157 |
| 98355_at   | 1455466_at   | Gpr133       | G protein-coupled receptor 133                  | -1.21 | 0.32 | -1.05 | 0.4574 | -1.26 | 0.0076 | -1.17 | 0.0405 | 1.39  | 0.173  |
| 98356_at   | 1449620_s_at | D16Wsu65e    | DNA segment, Chr 16, Wayne State Univers        | -1.1  | 0.41 | 1.35  | 0.0036 | 1.28  | 0.0092 | 1.52  | 0      | 1.21  | 0.1343 |
| 98357_at   | 1438297_at   | LOC433991    | LOC433991                                       | 1.28  | 0.2  | -1.06 | 0.6991 | 1.24  | 0.157  | -1.11 | 0.4537 | 1.07  | 0.7401 |
| 98360_at   | 1425812_a_at | Cacna1b      | calcium channel, voltage-dependent, N type      | -2.05 | 0.03 | -1.15 | 0.1633 | -1.06 | 0.4646 | -1.24 | 0.0549 | 1.8   | 0.0666 |
| 98361_at   | 1450799_at   | Adcyap1r1    | adenylate cyclase activating polypeptide 1 r    | 1.42  | 0.64 | 1.86  | 0.0326 | 2.14  | 0.0474 | 2.28  | 0.0235 | -1.17 | 0.6749 |
| 98365_at   | 1422949_at   | Nos1         | nitric oxide synthase 1, neuronal               | -1.88 | 0.3  | -1.37 | 0.1363 | 1.09  | 0.7077 | 1.06  | 0.7921 | 1.29  | 0.3486 |
| 98366_at   | 1421198_at   | Itgav        | integrin alpha V                                | -1.07 | 0.83 | -1.04 | 0.7599 | -1.08 | 0.5313 | 1.08  | 0.5916 | 1.05  | 0.9215 |
| 98367_at   | 1421537_at   | Hoxd3        | homeo box D3                                    | -1.07 | 0.84 | -1.14 | 0.4902 | 1.21  | 0.3442 | -1.12 | 0.4863 | -1.28 | 0.4602 |
| 98368_at   | 1421354_at   | Prkg2        | protein kinase, cGMP-dependent, type II         | -1.04 | 0.85 | -1.01 | 0.9079 | -1.35 | 0.0086 | -1.15 | 0.1422 | -1.05 | 0.8807 |
| 98370_at   | 1421781_at   | Upk2         | uropodin 2                                      | -3.05 | 0.13 | -1.2  | 0.41   | -1.3  | 0.2218 | -1.42 | 0.1298 | 1.25  | 0.5926 |
| 98372_at   | 1448789_at   | Aldh1a3      | aldehyde dehydrogenase family 1, subfamily      | -1.75 | 0.16 | 1.17  | 0.5459 | 1.42  | 0.035  | 1.51  | 0.0277 | 2.74  | 0.0065 |
| 98373_at   | 1450291_s_at | Ms4a4c       | membrane-spanning 4-domains, subfamily 4        | 1.1   | 0.78 | 2     | 0.2746 | 1.03  | 0.9263 | 2.83  | 0.2008 | 1.27  | 0.4374 |
| 98374_at   | 1450550_at   | Il5          | interleukin 5                                   | -1.51 | 0.32 | 1.06  | 0.7722 | 1.12  | 0.6924 | 1.19  | 0.4244 | 1.76  | 0.0707 |
| 98376_at   | 1420557_at   | Epha5        | Eph receptor A5                                 | -2.01 | 0.11 | 1.48  | 0.2632 | 1.65  | 0.318  | 1.32  | 0.2124 | 1.54  | 0.2261 |
| 98380_at   | 1418414_at   | Kcnh1        | potassium voltage-gated channel, subfamily      | -1.24 | 0.66 | 1.21  | 0.24   | -1.04 | 0.6883 | 1.13  | 0.4679 | 2.05  | 0.1776 |
| 98383_r_at | 1427745_x_at | MP4 /// Prb1 | proline rich protein MP4 /// proline-rich prote | -1.18 | 0.77 | 1.28  | 0.477  | 1.44  | 0.1329 | 1.18  | 0.6363 | 1.59  | 0.2211 |
| 98384_at   | 1450271_at   | Ptk6         | PTK6 protein tyrosine kinase 6                  | -1.95 | 0.16 | -1.51 | 0.004  | -1.36 | 0.0395 | -2.05 | 0.0007 | 1.08  | 0.818  |
| 98385_at   | 1421499_a_at | Ptpn14       | protein tyrosine phosphatase, non-receptor 1    | -1.74 | 0.05 | -1.24 | 0.0697 | -1.29 | 0.0245 | -1.17 | 0.0952 | 1.35  | 0.1645 |
| 98386_s_at | 1421297_a_at | Cacna1c      | calcium channel, voltage-dependent, L type,     | 2.2   | 0.07 | -1.08 | 0.7065 | -1.15 | 0.3939 | -1.17 | 0.4124 | 1.03  | 0.9235 |
| 98387_at   | 1422263_at   | Bdkrb2       | bradykinin receptor, beta 2                     | -5.07 | 0.09 | 1.13  | 0.287  | 1.18  | 0.3038 | 1.08  | 0.5457 | 1.64  | 0.2375 |
| 98391_at   | 1425144_at   | Klk11        | kallikrein 11                                   | 1.98  | 0.16 | 1.24  | 0.2754 | -1.13 | 0.2566 | 1.22  | 0.2599 | 1.27  | 0.5886 |
| 98392_at   | 1449911_at   | Lag3         | lymphocyte-activation gene 3                    | -1.2  | 0.76 | -1.91 | 0.0115 | -1.33 | 0.2068 | -1.57 | 0.0448 | 1.78  | 0.2345 |
| 98394_at   | 1449470_at   | Dlx1         | distal-less homeobox 1                          | -1.35 | 0.34 | 1     | 0.9488 | 1.15  | 0.0504 | 1.05  | 0.4698 | 1.02  | 0.9343 |
| 98395_at   | 1422012_at   | Crrh2        | corticotropin releasing hormone receptor 2      | -1.53 | 0.15 | -1.51 | 0.2235 | -1.33 | 0.3632 | -1.55 | 0.1891 | 1.82  | 0.0439 |
| 98397_at   | 1418973_at   | Blzf1        | basic leucine zipper nuclear factor 1           | 2.08  | 0.06 | 1.08  | 0.2913 | 1.1   | 0.4317 | 1.15  | 0.1756 | -1.22 | 0.4283 |
| 98398_s_at | 1451755_a_at | Apobec1      | apolipoprotein B editing complex 1              | -1.21 | 0.74 | -1.07 | 0.7298 | -1.41 | 0.0056 | 1.09  | 0.6777 | 1.05  | 0.7315 |
| 98400_at   | 1418264_at   | Solt         | SoxLZ/Sox6 leucine zipper binding protein ir    | 1.7   | 0.21 | -1.06 | 0.7071 | 1.11  | 0.5442 | 1.21  | 0.1319 | 1.45  | 0.3874 |
| 98401_at   | 1427377_x_at | Hsd3b3       | hydroxysteroid dehydrogenase-3, delta<5>-:      | 1.04  | 0.5  | 1.39  | 0.0199 | 1.11  | 0.4005 | 2.14  | 0.0007 | -1.38 | 0.0136 |
| 98402_at   | 1428847_a_at | Macf1        | microtubule-actin crosslinking factor 1         | 1.06  | 0.65 | 1.41  | 0.0004 | 1.25  | 0.1455 | 1.45  | 0.0081 | 1.68  | 0.0106 |
| 98403_at   | 1418646_at   | Gna-rs1      | guanine nucleotide binding protein, related s   | -1.2  | 0.29 | 1.2   | 0.0412 | 1.06  | 0.5824 | -1.01 | 0.8527 | 1.05  | 0.8739 |
| 98404_at   | 1417260_at   | U2af2        | U2 small nuclear ribonucleoprotein auxiliary    | -1.15 | 0.2  | 1.06  | 0.1459 | 1.04  | 0.2959 | -1    | 0.8464 | 1.29  | 0.0004 |
| 98405_at   | 1422601_at   | Serpinb9     | serine (or cysteine) proteinase inhibitor, clac | -1.12 | 0.85 | 1.04  | 0.8238 | -1.23 | 0.0656 | 1.12  | 0.5647 | -1.16 | 0.3985 |
| 98406_at   | 1418126_at   | Ccl5         | chemokine (C-C motif) ligand 5                  | 1.86  | 0.1  | 8.35  | 0.1606 | -1.03 | 0.935  | 15.59 | 0.0989 | 1.24  | 0.3613 |
| 98407_at   | 1418285_at   | Efnb1        | ephrin B1                                       | -1.65 | 0.05 | -1.11 | 0.1324 | -1.28 | 0.0289 | -1.22 | 0.0356 | 1.43  | 0.2124 |
| 98408_at   | 1423319_at   | Hhex         | hematopoietically expressed homeobox            | -1.37 | 0.23 | -1.02 | 0.8334 | 1.25  | 0.0429 | -1.26 | 0.048  | 1.03  | 0.9309 |
| 98410_at   | 1417793_at   | ligp2        | interferon inducible GTPase 2                   | -1.09 | 0.79 | 1.25  | 0.54   | -1.81 | 0.0265 | 1.2   | 0.6274 | -1.53 | 0.2164 |
| 98414_at   | 1418362_at   | Zfp42        | zinc finger protein 42                          | 1.01  | 0.98 | 1.15  | 0.6326 | 1.08  | 0.5644 | -1.14 | 0.2497 | 1.09  | 0.6849 |
| 98416_at   | 1451233_at   | Traf2        | Tnf receptor-associated factor 2                | -1.36 | 0.34 | 1.14  | 0.1813 | 1.09  | 0.3445 | 1.05  | 0.5233 | 1.25  | 0.0704 |
| 98417_at   | 1451905_a_at | Mx1          | myxovirus (influenza virus) resistance 1        | -1.21 | 0.73 | 2.16  | 0.374  | 1.09  | 0.7735 | 3.87  | 0.1187 | -1.15 | 0.7784 |
| 98418_at   | 1450978_at   | Dvl1         | dishevelled, dsh homolog 1 (Drosophila)         | -1.1  | 0.41 | 1.03  | 0.7354 | -1.07 | 0.621  | -1.07 | 0.4844 | 1.42  | 0.0006 |
| 98419_at   | 1417595_at   | Meox1        | mesenchyme homeobox 1                           | -1.45 | 0.35 | -1.1  | 0.6229 | -1.21 | 0.1614 | 1.03  | 0.8718 | 1.14  | 0.6985 |
| 98420_at   | 1459983_at   | Impa2        | inositol (myo)-1(or 4)-monophosphatase 2        | -1.16 | 0.78 | 1.81  | 0.3288 | 1.47  | 0.0027 | 1.06  | 0.6703 | 1.71  | 0.0275 |
| 98421_at   | 1456612_at   | Il17d        | Expressed sequence AU020094                     | -1.83 | 0.34 | 1.03  | 0.9033 | -1.1  | 0.645  | 1.39  | 0.3359 | 1.69  | 0.0142 |
| 98423_at   | 1423271_at   | Gjb2         | gap junction membrane channel protein bet       | -1.22 | 0.32 | -1.51 | 0      | -1.32 | 0.0061 | -2.46 | 0      | -2.62 | 0      |
| 98424_at   | 1452127_a_at | Ptpn13       | protein tyrosine phosphatase, non-receptor 1    | 1.32  | 0.44 | -1.06 | 0.7277 | -1.18 | 0.4352 | -1.2  | 0.3224 | 1.38  | 0.2165 |
| 98426_at   | 1418302_at   | Ppt2         | palmitoyl-protein thioesterase 2                | -1.18 | 0.15 | 1.02  | 0.8034 | -1.05 | 0.5622 | -1.01 | 0.8849 | -1.13 | 0.4765 |
| 98427_s_at | 1427705_a_at | Nfkb1        | nuclear factor of kappa light chain gene enh    | -1.27 | 0.24 | 1.08  | 0.3855 | -1.07 | 0.3138 | 1.12  | 0.1132 | -1.02 | 0.7821 |
| 98428_at   | 1460400_at   | Spg4         | spastic paraplegia 4 homolog (human)            | 1.96  | 0.08 | -1.08 | 0.3946 | 1.22  | 0.0584 | -1.01 | 0.8794 | 1.19  | 0.4044 |
| 98429_at   | 1417433_at   | Lypla2       | lysophospholipase 2                             | -1.27 | 0.14 | -1.02 | 0.8028 | -1    | 0.9864 | -1.1  | 0.3542 | -1.03 | 0.668  |

|            |              |                 |                                                                             |       |      |       |        |       |        |       |        |       |        |
|------------|--------------|-----------------|-----------------------------------------------------------------------------|-------|------|-------|--------|-------|--------|-------|--------|-------|--------|
| 98430_at   | 1421528_a_at | Surf5           | surfeit gene 5                                                              | -1.33 | 0.09 | -1.04 | 0.5945 | -1.08 | 0.2992 | -1.05 | 0.4336 | -1.2  | 0.5984 |
| 98431_at   | 1420636_a_at | Dusp12          | dual specificity phosphatase 12                                             | 1.12  | 0.67 | -1.03 | 0.7608 | -1.01 | 0.932  | -1.11 | 0.2834 | 1.32  | 0.2665 |
| 98432_at   | 1448134_at   | X99384          | cDNA sequence X99384                                                        | 1.09  | 0.49 | -1.26 | 0.0217 | 1.08  | 0.2532 | -1.24 | 0.0166 | 1.03  | 0.8275 |
| 98433_at   | 1417045_at   | Bid             | BH3 interacting domain death agonist                                        | 1.5   | 0.31 | 1.15  | 0.0753 | 1.1   | 0.334  | 1.13  | 0.2045 | -1.05 | 0.8964 |
| 98434_at   | 1449066_a_at | Arhgef7         | Rho guanine nucleotide exchange factor (GI                                  | -1.3  | 0.12 | -1.03 | 0.7918 | 1.09  | 0.3327 | -1    | 0.9952 | 1.28  | 0.3185 |
| 98435_at   | 1449383_at   | Adssl1          | adenylosuccinate synthetase like 1                                          | 3.23  | 0.01 | 1.91  | 0      | 1.2   | 0.1308 | 2.01  | 0      | 2.3   | 0.0006 |
| 98437_at   | 1449839_at   | Casp3           | caspase 3, apoptosis related cysteine protease                              | -1.31 | 0.03 | -1.18 | 0.0519 | -1.05 | 0.5009 | -1.15 | 0.0568 | -1.1  | 0.3772 |
| 98438_f_at | 1418536_at   | H2-Q7           | Histocompatibility 2, Q region locus 6                                      | -1.12 | 0.48 | 1.34  | 0.2054 | -1.12 | 0.0692 | 1.38  | 0.196  | -1.41 | 0.0756 |
| 98440_at   | 1417777_at   | Ltb4dh          | leukotriene B4 12-hydroxydehydrogenase                                      | 2.27  | 0.33 | 1.15  | 0.3602 | 1.69  | 0.0043 | 1.36  | 0.1038 | -1.2  | 0.4145 |
| 98441_at   | 1423369_at   | Fmr1            | fragile X mental retardation syndrome 1 homolog                             | 1.15  | 0.56 | 1.26  | 0.0076 | 1.11  | 0.5575 | 1.25  | 0.0024 | 1.04  | 0.7712 |
| 98444_g_at | 1422582_at   | Lep             | leptin                                                                      | -1.1  | 0.75 | 1.29  | 0.191  | 1.39  | 0.0983 | 1.37  | 0.4167 | 2.37  | 0.1125 |
| 98445_at   | 1423834_s_at | Gga1            | golgi associated, gamma adaptin ear containing                              | 1.33  | 0.46 | 1.09  | 0.3356 | 1.14  | 0.3165 | 1.12  | 0.2145 | 1.65  | 0.2193 |
| 98447_at   | 1418982_at   | Cebpa           | CCAAT/enhancer binding protein (C/EBP), epsilon                             | -1.26 | 0.33 | -1.03 | 0.6038 | -1    | 0.9955 | -1.14 | 0.0227 | -1.11 | 0.4739 |
| 98449_at   | 1448658_at   | Sart1           | squamous cell carcinoma antigen recognize                                   | 1.05  | 0.88 | 1.05  | 0.5673 | 1.14  | 0.155  | 1.12  | 0.1487 | 1.59  | 0.056  |
| 98451_at   | 1448657_a_at | Dnajb10         | DnaJ (Hsp40) homolog, subfamily B, member 10                                | 1.92  | 0.01 | -1.08 | 0.3861 | -1.13 | 0.1118 | -1.17 | 0.1024 | 1.02  | 0.9303 |
| 98452_at   | 1419300_at   | Flt1            | FMS-like tyrosine kinase 1                                                  | -1.09 | 0.19 | -1.15 | 0.1573 | -1.22 | 0.0747 | -1.16 | 0.2749 | 1.39  | 0.0506 |
| 98453_at   | 1451756_at   | Flt1            | FMS-like tyrosine kinase 1                                                  | -1.54 | 0.08 | 1.27  | 0.2248 | -1.01 | 0.9152 | 1.04  | 0.7099 | 1.46  | 0.0393 |
| 98454_at   | 1423967_at   | Palm            | paralemmin                                                                  | -1.09 | 0.62 | -1.13 | 0.1194 | 1.02  | 0.7196 | -1.12 | 0.1825 | -1.17 | 0.4858 |
| 98455_at   | 1452116_s_at | Atf2            | activating transcription factor 2                                           | -1.07 | 0.57 | 1.18  | 0.0433 | 1.24  | 0.1262 | 1.2   | 0.0126 | -1.11 | 0.5174 |
| 98456_at   | 1417334_at   | Stk19           | serine/threonine kinase 19                                                  | 1.61  | 0.36 | -1    | 0.9953 | -1.1  | 0.1938 | -1.07 | 0.32   | -1.16 | 0.6998 |
| 98457_at   | 1421225_a_at | Slc4a4          | solute carrier family 4 (anion exchanger), member 4                         | 2.51  | 0.07 | 1.35  | 0.0309 | -1.47 | 0.0795 | -1.15 | 0.5249 | 1.42  | 0.3253 |
| 98459_at   | 1425179_at   | Shmt1           | serine hydroxymethyl transferase 1 (soluble), cytosolic                     | 1.18  | 0.29 | -1.48 | 0      | -1.19 | 0.0054 | -1.65 | 0      | -1.55 | 0.0039 |
| 98460_at   | 1448223_at   | ---             | ---                                                                         | -1.2  | 0.18 | -1.13 | 0.1961 | -1.09 | 0.3289 | -1.02 | 0.8519 | 1.08  | 0.3687 |
| 98461_at   | 1417108_at   | 1200014P03Rik   | RIKEN cDNA 1200014P03 gene                                                  | 1.03  | 0.75 | -1.24 | 0.0116 | -1.11 | 0.3097 | -1.3  | 0.0015 | -1.2  | 0.1498 |
| 98462_s_at | 1425547_a_at | 1200014P03Rik   | RIKEN cDNA 1200014P03 gene                                                  | 1.16  | 0.73 | -1.1  | 0.3976 | -1.44 | 0.0762 | -1.35 | 0.0437 | 1.3   | 0.5791 |
| 98463_at   | 1426804_at   | Smarca4         | SWI/SNF related, matrix associated, actin dependent, nuclear core protein 4 | 1.24  | 0.35 | -1.07 | 0.2883 | -1.14 | 0.0297 | -1.17 | 0.0131 | -1.54 | 0.0323 |
| 98466_r_at | 1419603_at   | ---             | ---                                                                         | 1.06  | 0.87 | 1.46  | 0.1554 | 1.2   | 0.3712 | 1.44  | 0.3814 | 1.83  | 0.0639 |
| 98467_at   | 1431808_a_at | Itih4           | inter alpha-trypsin inhibitor, heavy chain 4                                | 1.13  | 0.36 | -1.01 | 0.7676 | -1.08 | 0.1479 | -1.16 | 0.0218 | -1.69 | 0.0194 |
| 98468_r_at | 1434821_at   | Brd1            | bromodomain containing 1                                                    | 1.85  | 0.06 | 1.05  | 0.7218 | 1.2   | 0.5136 | 1.34  | 0.0698 | 1.09  | 0.5847 |
| 98469_at   | 1451246_s_at | Aurkb           | aurora kinase B                                                             | 3.3   | 0.33 | 1.08  | 0.3357 | 1.11  | 0.2529 | 1.47  | 0.1518 | 1.58  | 0.1628 |
| 98470_at   | 1417154_at   | Slc25a14        | solute carrier family 25 (mitochondrial carrier), member 14                 | 1.48  | 0.33 | -1.03 | 0.7801 | 1.48  | 0.2379 | -1.01 | 0.9451 | -1.11 | 0.6466 |
| 98471_f_at | 1449877_s_at | Kifc1           | kinesin family member C1                                                    | -1.24 | 0.29 | 1.04  | 0.7841 | 1.08  | 0.4702 | 1     | 0.9952 | 1.03  | 0.7748 |
| 98472_at   | 1449556_at   | H2-T23 /// C92C | histocompatibility 2, T region locus 23 /// RIKEN cDNA 1449556 gene         | 1.01  | 0.92 | 1.16  | 0.4386 | -1.15 | 0.0303 | 1.2   | 0.3582 | 1.17  | 0.1341 |
| 98473_at   | 1438841_s_at | Arg2            | arginase type II                                                            | -1.4  | 0.01 | -1.33 | 0.4194 | 1.38  | 0.5897 | 1.04  | 0.9066 | 2.05  | 0.0289 |
| 98474_r_at | 1418424_at   | Tnfaip6         | tumor necrosis factor alpha induced protein 6                               | -6.72 | 0.07 | -1.04 | 0.9222 | -1.11 | 0.7774 | -1.05 | 0.9015 | 1.85  | 0.3122 |
| 98475_at   | 1419442_at   | Matn2           | matrilin 2                                                                  | 1.42  | 0.39 | 1.08  | 0.6929 | -1.08 | 0.6847 | -1.03 | 0.8879 | -1.46 | 0.287  |
| 98476_at   | 1452124_at   | Ank3 /// 290005 | ankyrin 3, epithelial /// RIKEN cDNA 290005 gene                            | 1.5   | 0.01 | 1.28  | 0.0216 | 1.17  | 0.2278 | 1.35  | 0.0106 | 1.87  | 0.0373 |
| 98478_at   | 1416488_at   | Ccng2           | cyclin G2                                                                   | -1.46 | 0.15 | 1.13  | 0.4764 | -1.15 | 0.4747 | 1.12  | 0.4704 | 1.07  | 0.8279 |
| 98480_s_at | 1448975_s_at | Ren1 /// Ren2   | renin 1 structural /// renin 2 tandem duplication                           | 1.3   | 0.67 | 1.23  | 0.0786 | 1.32  | 0.0475 | 1.1   | 0.4723 | 1.56  | 0.127  |
| 98482_at   | 1417092_at   | Pthr1           | parathyroid hormone receptor 1                                              | 1.6   | 0.43 | -1.08 | 0.5245 | 1.07  | 0.5749 | 1.16  | 0.1913 | 1.1   | 0.7808 |
| 98483_at   | 1448656_at   | Cacnb3          | Calcium channel, voltage-dependent, beta 3 subunit                          | 1.42  | 0.57 | 1.01  | 0.9385 | -1.66 | 0.0268 | -1.1  | 0.6735 | 1.4   | 0.3501 |
| 98484_at   | 1417901_a_at | Ica1            | islet cell autoantigen 1                                                    | 1.17  | 0.35 | 1.21  | 0.2052 | 1.07  | 0.6918 | 1.17  | 0.4487 | -1.05 | 0.7686 |
| 98485_at   | 1431805_a_at | Rhpn2           | rhophilin, Rho GTPase binding protein 2                                     | 1.57  | 0.16 | -1.08 | 0.5763 | 1.05  | 0.7499 | -1.05 | 0.717  | -1.52 | 0.2931 |
| 98486_at   | 1418105_at   | Stmn4           | stathmin-like 4                                                             | -1.09 | 0.58 | -1.17 | 0.1236 | -1.03 | 0.7917 | -1.05 | 0.5166 | 1.53  | 0.0165 |
| 98488_at   | 1427026_at   | Myh4            | myosin, heavy polypeptide 4, skeletal muscle                                | -1.53 | 0.46 | -6.92 | 0.2879 | -2.04 | 0.5354 | -4.05 | 0.3491 | 1.39  | 0.6843 |
| 98489_at   | 1455730_at   | Dlg7            | discs, large homolog 7 (Drosophila)                                         | 1.26  | 0.49 | 1.02  | 0.9403 | 1.16  | 0.603  | -1    | 0.997  | 2.13  | 0.0529 |
| 98492_at   | 1460253_at   | Kkfsf7          | chemokine-like factor super family 7                                        | 1.13  | 0.49 | 1.04  | 0.6326 | 1.08  | 0.4889 | 1.03  | 0.7779 | 1.03  | 0.8151 |
| 98493_at   | 1424328_s_at | 3200002M19Rik   | RIKEN cDNA 3200002M19 gene                                                  | 1.93  | 0.02 | 1.12  | 0.0507 | -1.03 | 0.6101 | 1.06  | 0.2044 | -1.16 | 0.6092 |
| 98495_at   | 1460361_at   | 5033414D02Rik   | RIKEN cDNA 5033414D02 gene                                                  | 1.27  | 0.32 | 1.15  | 0.4285 | -1.27 | 0.1985 | 1.25  | 0.2497 | 1.33  | 0.2221 |
| 98496_at   | 1416737_at   | Gys3            | glycogen synthase 3, brain                                                  | 1     | 1    | 1.16  | 0.1973 | 1.08  | 0.2469 | 1.06  | 0.4525 | 1.53  | 0.0689 |
| 98497_at   | 1449355_a_at | Eps15-rs        | epidermal growth factor receptor pathway substrate 15-related               | 1.07  | 0.61 | 1.23  | 0.1168 | 1.16  | 0.1883 | 1.22  | 0.1003 | 1.17  | 0.328  |
| 98498_at   | 1448659_at   | Casp7           | caspase 7                                                                   | 1     | 0.99 | -1.08 | 0.3839 | 1.01  | 0.8776 | 1.02  | 0.824  | -1.71 | 0.0048 |
| 98499_s_at | 1426062_a_at | Casp7           | caspase 7                                                                   | -1.47 | 0.68 | -1.21 | 0.0852 | -1.31 | 0.0011 | -1.23 | 0.0133 | -4.23 | 0.0042 |

|            |              |               |                                                |       |      |       |        |       |        |       |        |       |        |
|------------|--------------|---------------|------------------------------------------------|-------|------|-------|--------|-------|--------|-------|--------|-------|--------|
| 98500_at   | 1425145_at   | Il1r1         | interleukin 1 receptor-like 1                  | -2.01 | 0.33 | -1.08 | 0.7775 | -1.12 | 0.6287 | 1.1   | 0.6595 | 1.97  | 0.0278 |
| 98501_at   | 1422317_a_at | Il1r1         | interleukin 1 receptor-like 1                  | -2.76 | 0.22 | -1.01 | 0.9644 | 1.46  | 0.1138 | -1.2  | 0.4549 | -1.21 | 0.6302 |
| 98502_at   | 1448922_at   | Dusp19        | dual specificity phosphatase 19                | 1.07  | 0.69 | -1.18 | 0.049  | -1.19 | 0.1281 | -1.27 | 0.0024 | -1.81 | 0.0031 |
| 98503_at   | 1417512_at   | ---           | ---                                            | 1.1   | 0.48 | 1.11  | 0.164  | 1.07  | 0.4281 | 1.17  | 0.0239 | -1.08 | 0.4093 |
| 98506_r_at | 1422492_at   | Cpox          | coproporphyrinogen oxidase                     | -1.12 | 0.63 | 1.06  | 0.6426 | -1.08 | 0.3711 | -1    | 0.9728 | -1.14 | 0.4057 |
| 98508_s_at | 1422620_s_at | Ppap2a        | phosphatidic acid phosphatase 2a               | 1.7   | 0.08 | 1.4   | 0.0026 | 1.23  | 0.0744 | 1.37  | 0.0361 | 1.49  | 0.0358 |
| 98509_at   | 1426234_s_at | BC002199      | cDNA sequence BC002199                         | 1.54  | 0.02 | 1.57  | 0      | 1.31  | 0.008  | 1.45  | 0      | 1.33  | 0.0169 |
| 98511_at   | 1418573_a_at | Raly          | hnRNP-associated with lethal yellow            | 1.45  | 0.4  | 1.05  | 0.7495 | 1.04  | 0.8206 | -1.04 | 0.7961 | 1.19  | 0.5284 |
| 98512_at   | 1452462_a_at | Banp          | Btg3 associated nuclear protein                | -1.1  | 0.75 | 1.2   | 0.0572 | 1.18  | 0.1511 | 1.11  | 0.3935 | 1.89  | 0.0347 |
| 98513_at   | 1415842_at   | MGI:1929514   | G protein beta subunit-like                    | -1.31 | 0.01 | 1.02  | 0.8241 | 1     | 0.9605 | -1.04 | 0.5797 | 1.05  | 0.7441 |
| 98514_at   | 1451791_at   | Tfpi          | tissue factor pathway inhibitor                | 2.73  | 0.02 | 1.3   | 0.3447 | 1.21  | 0.609  | 1.28  | 0.3386 | 3.78  | 0.0037 |
| 98515_at   | 1448884_at   | Gtf2e2        | general transcription factor II E, polypeptide | 1.36  | 0.09 | -1.15 | 0.1791 | 1.07  | 0.447  | -1.05 | 0.6617 | 1.13  | 0.6342 |
| 98516_at   | 1424117_at   | BC056474      | cDNA sequence BC056474                         | -1.34 | 0.11 | -1.12 | 0.0151 | -1.08 | 0.153  | -1.12 | 0.0714 | 1.03  | 0.7977 |
| 98519_r_at | 1453092_at   | 2300002G24Rik | RIKEN cDNA 2300002G24 gene                     | -1.92 | 0.07 | 1.1   | 0.4803 | 1.33  | 0.0149 | 1.28  | 0.2116 | 1.66  | 0.2035 |
| 98521_at   | 1433916_at   | Vamp3         | vesicle-associated membrane protein 3          | 1.08  | 0.71 | 1.04  | 0.7442 | 1     | 0.9854 | 1.08  | 0.3911 | 1.15  | 0.2982 |
| 98524_f_at | 1434278_at   | ---           | ---                                            | 1.72  | 0.14 | 1.57  | 0.0009 | -1.05 | 0.7472 | 1.79  | 0.0007 | 1.65  | 0.015  |
| 98525_f_at | 1452406_x_at | MGI:2384747   | erythroid differentiation regulator 1          | -8.41 | 0.06 | 1.06  | 0.6692 | 1.5   | 0.0017 | 1.44  | 0.0032 | 1     | 0.9897 |
| 98527_at   | 1418321_at   | Dci           | dodecenoyl-Coenzyme A delta isomerase (3       | 1.41  | 0.04 | 1.19  | 0.0543 | 1.25  | 0.0161 | 1.28  | 0.0484 | 1.09  | 0.4006 |
| 98528_at   | 1415763_a_at | ---           | ---                                            | 1.18  | 0.6  | -1.04 | 0.6315 | -1.03 | 0.7076 | -1.07 | 0.399  | -1.1  | 0.3421 |
| 98529_at   | 1448608_at   | Dtprp         | decidual/trophoblast prolactin-related protein | -2.48 | 0.11 | 1.43  | 0.2811 | 1.23  | 0.6006 | -1.17 | 0.6123 | -1.17 | 0.6904 |
| 98531_g_at | 1436222_at   | Gas5          | Growth arrest specific 5                       | 1.74  | 0.01 | 1.21  | 0.0301 | 1.14  | 0.185  | 1.22  | 0.0011 | 1.53  | 0.0076 |
| 98532_at   | 1456314_x_at | Cdk2ap1       | CDK2 (cyclin-dependent kinase 2)-associate     | -1.29 | 0.36 | 1.03  | 0.7146 | 1.05  | 0.5652 | -1.09 | 0.2484 | -1.34 | 0.1667 |
| 98533_at   | 1416727_a_at | Cyb5          | cytochrome b-5                                 | 1.06  | 0.66 | 1.04  | 0.4564 | -1.02 | 0.7295 | 1.07  | 0.2465 | 1.46  | 0.0012 |
| 98534_at   | 1449480_at   | Sap18         | Sin3-associated polypeptide 18                 | 1.04  | 0.87 | 1.08  | 0.5283 | 1.16  | 0.203  | -1.04 | 0.6248 | 1.42  | 0.2395 |
| 98535_at   | 1449183_at   | Comt          | catechol-O-methyltransferase                   | -2.39 | 0    | -1.24 | 0.0004 | -1.1  | 0.2269 | -1.33 | 0.0017 | -1.54 | 0.0013 |
| 98538_at   | 1426820_at   | 2610507B11Rik | RIKEN cDNA 2610507B11 gene                     | 1.17  | 0.33 | -1.18 | 0.0201 | -1.06 | 0.263  | -1.12 | 0.0382 | -1.25 | 0.1184 |
| 98540_g_at | 1437039_at   | ---           | ---                                            | -1.25 | 0.64 | 1.31  | 0.0025 | 1.33  | 0.0982 | 1.44  | 0.0001 | 1.07  | 0.8252 |
| 98543_at   | 1448591_at   | Ctss          | cathepsin S                                    | 1.25  | 0.35 | 1.55  | 0.3448 | -1.18 | 0.1409 | 2     | 0.2564 | 1.16  | 0.4053 |
| 98544_at   | 1416395_at   | Guk1          | guanylate kinase 1                             | 1.23  | 0.2  | -1.09 | 0.3264 | -1.1  | 0.4094 | -1.04 | 0.6614 | -1.06 | 0.3487 |
| 98545_at   | 1416202_at   | Bcap37        | B-cell receptor-associated protein 37          | 1.43  | 0.05 | 1.22  | 0.0013 | 1.08  | 0.5208 | 1.16  | 0.0253 | 1.51  | 0.0964 |
| 98547_at   | 1448799_s_at | Mrps12        | mitochondrial ribosomal protein S12            | 1.06  | 0.67 | -1.17 | 0.0876 | -1.01 | 0.9517 | -1.29 | 0.0094 | -1.18 | 0.5872 |
| 98549_at   | 1420484_a_at | Vtn           | vitronectin                                    | -1.42 | 0.05 | -1.03 | 0.4695 | 1.01  | 0.8462 | -1.05 | 0.289  | -1.28 | 0.0374 |
| 98550_at   | 1426853_at   | Set           | SET translocation                              | 1.34  | 0.02 | 1.11  | 0.1304 | 1.17  | 0.1593 | 1.12  | 0.055  | 1.11  | 0.5512 |
| 98552_at   | 1416707_a_at | Pmf1          | polyamine-modulated factor 1                   | 1.76  | 0.19 | -1.22 | 0.0239 | -1.28 | 0.0678 | -1.28 | 0.0462 | 1.19  | 0.343  |
| 98553_at   | 1426457_at   | Slmap         | sarcolemma associated protein                  | 1.25  | 0.09 | -1.06 | 0.2968 | 1.07  | 0.5313 | 1.08  | 0.3507 | -1.13 | 0.4286 |
| 98554_at   | 1417663_a_at | Ndr3          | N-myc downstream regulated gene 3              | 4.25  | 0.02 | 1.06  | 0.8199 | 1.34  | 0.2543 | 1.31  | 0.2563 | -2.35 | 0.1511 |
| 98555_at   | 1448361_at   | Ttc3          | tetratricopeptide repeat domain 3              | 2.28  | 0.03 | 1.47  | 0.0007 | 1.55  | 0.0056 | 1.54  | 0.0172 | 2.75  | 0.0124 |
| 98558_r_at | 1451205_at   | Psmb4         | proteasome (prosome, macropain) subunit, l     | -5.36 | 0.2  | 1.28  | 0.3169 | 2.66  | 0.1215 | 1.57  | 0.3825 | -1.31 | 0.5841 |
| 98559_at   | 1452469_a_at | Smtn          | smoothelin                                     | -4.02 | 0.29 | 1.09  | 0.1972 | 1.17  | 0.0145 | -1.03 | 0.6705 | 1.26  | 0.4496 |
| 98560_at   | 1460740_at   | Cltb          | clathrin, light polypeptide (Lcb)              | 1.26  | 0.43 | -1.15 | 0.0655 | 1.02  | 0.8477 | -1.13 | 0.0222 | -1.18 | 0.4255 |
| 98561_at   | 1450813_a_at | Tnni1         | troponin I, skeletal, slow 1                   | -1.69 | 0.09 | 1.45  | 0.2014 | 1.32  | 0.3846 | 1.42  | 0.1717 | 1.05  | 0.9121 |
| 98562_at   | 1417381_at   | C1qa          | complement component 1, q subcomponent         | 1.39  | 0.51 | -1.05 | 0.8    | -1.4  | 0.0428 | -1.04 | 0.8908 | -1.13 | 0.6299 |
| 98564_f_at | 1415876_a_at | Rps26         | ribosomal protein S26                          | -1.08 | 0.58 | 1.17  | 0.0001 | 1.28  | 0.0057 | 1.16  | 0.0003 | 1.54  | 0.0159 |
| 98568_at   | 1415835_at   | Csh2          | chorionic somatomammotropin hormone 2          | -1.12 | 0.27 | -1.23 | 0.1352 | -1.02 | 0.9177 | -1.18 | 0.1986 | 1.19  | 0.7133 |
| 98571_s_at | 1416669_s_at | Naca          | nascent polypeptide-associated complex alp     | 1.73  | 0.11 | 1.05  | 0.5265 | 1.05  | 0.6759 | 1.08  | 0.301  | 1.06  | 0.6638 |
| 98574_at   | 1422453_at   | Prpf8         | pre-mRNA processing factor 8                   | 1.4   | 0.15 | -1.03 | 0.6488 | -1.05 | 0.3744 | -1.07 | 0.3618 | 1.14  | 0.1649 |
| 98575_at   | 1423828_at   | Fasn          | fatty acid synthase                            | -1.61 | 0.28 | -3.12 | 0.0009 | -1.9  | 0.016  | -3.97 | 0.0003 | -5.51 | 0.001  |
| 98578_at   | 1455041_at   | Mosg          | mosg protein                                   | -1.17 | 0.42 | 1.03  | 0.7855 | 1.05  | 0.7392 | -1.12 | 0.3733 | 1.17  | 0.6023 |
| 98579_at   | 1417065_at   | Egr1          | early growth response 1                        | 1.53  | 0.08 | 1.65  | 0.0975 | -1.08 | 0.7335 | 1.95  | 0.0045 | 2.51  | 0.0034 |
| 98580_at   | 1415678_at   | Ppm1a         | protein phosphatase 1A, magnesium depend       | 1.4   | 0.25 | -1    | 0.9606 | 1.17  | 0.0412 | 1.03  | 0.8017 | -1.07 | 0.561  |
| 98582_at   | 1452986_at   | Hgd           | homogentisate 1, 2-dioxygenase                 | 1.34  | 0.26 | -1.03 | 0.6171 | 1.03  | 0.7657 | -1.02 | 0.7889 | -1.1  | 0.43   |
| 98583_at   | 1426520_at   | Btg4          | B-cell translocation gene 4                    | -2.4  | 0.39 | 1.32  | 0.4396 | 1.19  | 0.6775 | -1.09 | 0.7407 | 1.01  | 0.9773 |
| 98586_at   | 1420477_at   | Nap111        | nucleosome assembly protein 1-like 1           | 1.04  | 0.92 | -1.08 | 0.5999 | 1.02  | 0.8867 | -1.12 | 0.3369 | 1.45  | 0.3577 |

|            |              |                 |                                                        |       |      |       |        |       |        |       |        |       |        |
|------------|--------------|-----------------|--------------------------------------------------------|-------|------|-------|--------|-------|--------|-------|--------|-------|--------|
| 98587_at   | 1420478_at   | Nap111          | nucleosome assembly protein 1-like 1                   | -1.21 | 0.68 | 1.02  | 0.7424 | 1.09  | 0.3204 | 1     | 0.9514 | -1.19 | 0.4296 |
| 98588_at   | 1417220_at   | Fah             | fumarylacetoacetate hydrolase                          | 1     | 0.95 | -1.07 | 0.0071 | -1.02 | 0.2903 | -1.07 | 0.0534 | -1.01 | 0.9122 |
| 98589_at   | 1448318_at   | Adfp            | adipose differentiation related protein                | -1.03 | 0.89 | -1.52 | 0.0051 | -1.31 | 0.1351 | -1.82 | 0.0004 | -3.16 | 0.0003 |
| 98590_at   | 1417654_at   | Sdc4            | syndecan 4                                             | 1.03  | 0.95 | 1.04  | 0.5119 | 1.17  | 0.3911 | 1.29  | 0.2677 | 1.07  | 0.6066 |
| 98593_at   | 1426662_at   | Cmas            | cytidine monophospho-N-acetylneuraminic acid           | -1.03 | 0.92 | -1.21 | 0.0055 | -1.15 | 0.0671 | -1.15 | 0.0281 | -1.94 | 0.0065 |
| 98594_at   | 1433581_at   | 1190002N15Rik   | RIKEN cDNA 1190002N15 gene                             | 1.46  | 0.36 | 1.61  | 0      | 1.14  | 0.4249 | 1.86  | 0.0001 | -1.25 | 0.4462 |
| 98596_s_at | 1449198_a_at | St3gal5         | ST3 beta-galactoside alpha-2,3-sialyltransferase       | -1.18 | 0.58 | -1.99 | 0.0027 | 1.41  | 0.2064 | -1.61 | 0.0132 | 1.27  | 0.4719 |
| 98597_at   | 1417172_at   | Ube2l6          | ubiquitin-conjugating enzyme E2L 6                     | -1.25 | 0.49 | 1.15  | 0.4113 | -1.01 | 0.9377 | 1.09  | 0.5823 | -1.05 | 0.8193 |
| 98598_at   | 1458854_at   | C78891          | expressed sequence C78891                              | 1.92  | 0.12 | -1.77 | 0.1674 | -1.25 | 0.5347 | -1.63 | 0.2365 | -1.8  | 0.2842 |
| 98599_at   | 1416597_at   | Hdgfrp2         | hepatoma-derived growth factor, related protein        | 1.5   | 0.13 | -1.09 | 0.2311 | -1.03 | 0.751  | 1     | 0.9463 | -1.02 | 0.9457 |
| 98600_at   | 1460351_at   | S100a11         | S100 calcium binding protein A11 (calizzarin)          | 1.46  | 0.1  | 2.02  | 0.2158 | 1.2   | 0.4975 | 2.44  | 0.1533 | 1.44  | 0.0987 |
| 98602_at   | 1423749_s_at | Rangap1         | RAN GTPase activating protein 1                        | -1.64 | 0.05 | -1.76 | 0      | -1.04 | 0.7205 | -1.78 | 0      | -1.58 | 0.0105 |
| 98604_at   | 1427720_a_at | Nnp1            | novel nuclear protein 1                                | 1.87  | 0.05 | 1.03  | 0.7274 | -1.01 | 0.9284 | 1.17  | 0.0137 | 1.16  | 0.27   |
| 98605_at   | 1415694_at   | Wars            | tryptophanyl-tRNA synthetase                           | -1.21 | 0.44 | -1.08 | 0.561  | -1.09 | 0.4695 | -1.12 | 0.3458 | 1.18  | 0.1096 |
| 98606_s_at | 1437832_x_at | Wars            | tryptophanyl-tRNA synthetase                           | 1.08  | 0.8  | 1.01  | 0.9799 | -1.23 | 0.0869 | -1.07 | 0.6927 | -1.08 | 0.3599 |
| 98608_at   | 1420024_s_at | Etf1            | eukaryotic translation termination factor 1            | -1.54 | 0.14 | -1.1  | 0.265  | 1.13  | 0.3348 | -1.07 | 0.3899 | 1.29  | 0.0166 |
| 98609_at   | 1417038_at   | 9-Sep           | septin 9                                               | -1.06 | 0.84 | -1.21 | 0.0002 | -1.45 | 0.0001 | -1.42 | 0      | -1.35 | 0.1475 |
| 98610_at   | 1452585_at   | Mrps28          | mitochondrial ribosomal protein S28                    | 1.22  | 0.51 | 1.08  | 0.2442 | 1.3   | 0.0008 | 1.12  | 0.0645 | -1.05 | 0.7592 |
| 98612_at   | 1418113_at   | Cyp2d10         | cytochrome P450, family 2, subfamily d, polypeptide 10 | -1.07 | 0.76 | -1.03 | 0.6091 | 1.11  | 0.0608 | 1.01  | 0.832  | -1.3  | 0.059  |
| 98613_at   | 1428421_a_at | 2700085E05Rik   | RIKEN cDNA 2700085E05 gene                             | 1.65  | 0.14 | 1.14  | 0.0835 | 1.28  | 0.0027 | 1.05  | 0.5191 | -1.16 | 0.1503 |
| 98614_at   | 1453686_x_at | Nphp1           | nephronophthisis 1 (juvenile) homolog (human)          | 1.13  | 0.7  | -1.01 | 0.9187 | -1.15 | 0.4596 | 1.13  | 0.4167 | 1.44  | 0.2672 |
| 98615_at   | 1425780_a_at | 0610041E09Rik   | RIKEN cDNA 0610041E09 gene                             | 1.28  | 0.01 | 1.12  | 0.4536 | -1.05 | 0.7335 | 1.14  | 0.172  | -1.63 | 0.0011 |
| 98616_f_at | 1448554_s_at | Myh6            | myosin, heavy polypeptide 6, cardiac muscle, isoform 1 | -1.15 | 0.5  | 1.14  | 0.2894 | 1.18  | 0.4193 | 1.1   | 0.4219 | 1.59  | 0.0406 |
| 98617_at   | 1415799_at   | Wbp11           | WW domain binding protein 11                           | -1.01 | 0.96 | 1.2   | 0.0796 | 1.27  | 0.0275 | 1.22  | 0.0364 | 1.02  | 0.839  |
| 98618_at   | 1449116_a_at | Dtymk           | deoxythymidylate kinase                                | -1.15 | 0.27 | -1.1  | 0.2632 | 1.06  | 0.5647 | 1.06  | 0.5933 | -1.15 | 0.2269 |
| 98619_at   | 1452681_at   | Dtymk           | deoxythymidylate kinase                                | 1.18  | 0.44 | -1.1  | 0.319  | -1.16 | 0.1034 | -1.04 | 0.6875 | -1.44 | 0.2975 |
| 98624_at   | 1421265_a_at | Rnpc1           | RNA-binding region (RNP1, RRM) containing protein 1    | -1.08 | 0.7  | 1.13  | 0.3015 | 1.09  | 0.4955 | -1    | 0.9967 | 1.18  | 0.4939 |
| 98625_s_at | 1416185_a_at | Adh5            | alcohol dehydrogenase 5 (class III), chi polypeptide 5 | 1.13  | 0.46 | 1.14  | 0.0045 | 1.08  | 0.1992 | 1.21  | 0      | 1     | 0.9439 |
| 98626_at   | 1417105_at   | 1810017G16Rik   | RIKEN cDNA 1810017G16 gene                             | 1.69  | 0.19 | 1.03  | 0.5531 | 1.25  | 0.0055 | 1.17  | 0.0971 | 1.38  | 0.1168 |
| 98627_at   | 1454159_a_at | Igfbp2          | insulin-like growth factor binding protein 2           | 2.43  | 0.19 | 1.93  | 0.0003 | 1.91  | 0.0027 | 2.68  | 0      | 7.6   | 0.0007 |
| 98629_f_at | 1427418_a_at | Hif1a           | hypoxia inducible factor 1, alpha subunit              | -1.3  | 0.29 | -1.07 | 0.5737 | 1.07  | 0.712  | -1.03 | 0.7983 | -1.25 | 0.1301 |
| 98632_at   | 1417976_at   | Ada             | adenosine deaminase                                    | -1.88 | 0.1  | -1.07 | 0.7956 | 1.05  | 0.8595 | -1.24 | 0.2986 | 2.06  | 0.3049 |
| 98635_at   | 1423949_at   | D11Moh35        | DNA segment, Chr 11, KL Mohlke 35                      | 1.22  | 0.18 | 1.01  | 0.9694 | 1.08  | 0.5303 | -1.07 | 0.5982 | 1.36  | 0.0005 |
| 98726_at   | 1421444_at   | Pgr             | progesterone receptor                                  | -4.27 | 0.11 | -1.3  | 0.4564 | 1.08  | 0.8246 | -1.01 | 0.983  | -1.25 | 0.4793 |
| 98727_at   | 1422193_at   | Gucy2e          | guanylate cyclase 2e                                   | -1.53 | 0.05 | -1.24 | 0.336  | 1.26  | 0.0945 | 1.01  | 0.9751 | 1.13  | 0.5342 |
| 98728_at   | 1421649_at   | Tnfrsf8         | tumor necrosis factor receptor superfamily, member 8   | 1.15  | 0.77 | -1.06 | 0.8219 | -1.2  | 0.4066 | -1.46 | 0.0744 | 1.17  | 0.8059 |
| 98730_at   | 1421523_at   | Fgf17           | fibroblast growth factor 17                            | -1.56 | 0.54 | -1.16 | 0.651  | 1.13  | 0.7421 | 1.29  | 0.5511 | 1.35  | 0.4882 |
| 98731_at   | 1422119_at   | Rab5b           | RAB5B, member RAS oncogene family                      | 1.05  | 0.69 | -1.21 | 0.0026 | -1.26 | 0.1424 | -1.71 | 0      | 1.38  | 0.2453 |
| 98732_at   | 1450549_s_at | Elk4            | ELK4, member of ETS oncogene family                    | -1.96 | 0.34 | 1.19  | 0.3647 | 1.03  | 0.8909 | -1.07 | 0.7452 | 1.63  | 0.0786 |
| 98756_at   | 1430195_at   | 2810043O03Rik   | RIKEN cDNA 2810043O03 gene                             | 1.12  | 0.87 | 1.76  | 0.1795 | 2.09  | 0.129  | 1.62  | 0.1994 | 2.7   | 0.2077 |
| 98758_at   | 1420338_at   | ---             | ---                                                    | -3.02 | 0.29 | 1.14  | 0.6833 | -1.3  | 0.5013 | -1.63 | 0.2077 | -1.52 | 0.3008 |
| 98759_f_at | 1423846_x_at | Tuba2           | tubulin, alpha 2                                       | -1.07 | 0.71 | -1.27 | 0.1337 | -1.05 | 0.6684 | -1.22 | 0.1558 | -1.97 | 0.0011 |
| 98762_f_at | 1449972_s_at | Zfp97 /// BC018 | zinc finger protein 97 /// cDNA sequence BC018         | 2.16  | 0.01 | 1.78  | 0.0132 | 1.56  | 0.137  | 2.06  | 0.0008 | 1.53  | 0.0543 |
| 98764_at   | 1427738_at   | D0Kist2         | DNA segment, KIST 2                                    | -1.02 | 0.95 | 1.02  | 0.9643 | 1.34  | 0.3859 | 1.21  | 0.6685 | -1.94 | 0.4161 |
| 98766_at   | 1421922_at   | ---             | ---                                                    | 2.09  | 0.16 | -1.06 | 0.4567 | -1.25 | 0.1141 | -1.34 | 0.0097 | -1.36 | 0.6343 |
| 98767_at   | 1435824_at   | Yy1             | YY1 transcription factor                               | 1.05  | 0.89 | -1.03 | 0.7386 | 1.43  | 0.0019 | 1.01  | 0.9028 | -1.26 | 0.1978 |
| 98768_at   | 1449310_at   | Ptger2          | prostaglandin E receptor 2 (subtype EP2)               | -1.03 | 0.87 | -1.04 | 0.8698 | 1.28  | 0.2171 | 1.09  | 0.6896 | 1.3   | 0.6557 |
| 98770_at   | 1420441_at   | Cenpc1          | centromere autoantigen C1                              | 1.06  | 0.89 | -1.39 | 0.1265 | -1.11 | 0.7017 | -1.36 | 0.1918 | 1.04  | 0.9203 |
| 98772_at   | 1419728_at   | Cxcl5           | chemokine (C-X-C motif) ligand 5                       | -1.86 | 0.17 | -1.14 | 0.5755 | -1.98 | 0.0221 | -1.41 | 0.1418 | -1.66 | 0.2917 |
| 98774_at   | 1427381_at   | ---             | ---                                                    | -1.2  | 0.64 | 1.26  | 0.6016 | 1.05  | 0.8631 | 1.41  | 0.3437 | 1.43  | 0.4954 |
| 98775_at   | 1418513_at   | Stk3            | serine/threonine kinase 3 (Ste20, yeast homologue)     | 3.24  | 0.09 | -1.31 | 0.1471 | -1.38 | 0.2305 | -1.23 | 0.1757 | -1.07 | 0.9019 |
| 98777_at   | 1423004_at   | Vipr1           | vasoactive intestinal peptide receptor 1               | -1.55 | 0.27 | 1.16  | 0.5922 | -1.15 | 0.4441 | -1.35 | 0.1114 | 2.04  | 0.1437 |
| 98778_at   | 1460626_at   | D5Ert606e       | DNA segment, Chr 5, ERATO Doi 606, expressed           | -1.34 | 0.01 | -1.1  | 0.2822 | -1.13 | 0.2323 | -1.07 | 0.5043 | 1.52  | 0.0239 |

|            |              |         |                                                  |       |      |       |        |       |        |       |        |       |        |
|------------|--------------|---------|--------------------------------------------------|-------|------|-------|--------|-------|--------|-------|--------|-------|--------|
| 98780_at   | 1427605_at   | Hoxb3   | homeo box B3                                     | -2.02 | 0.05 | -1.16 | 0.276  | 1.1   | 0.5247 | -1.02 | 0.8832 | 1.22  | 0.5717 |
| 98781_at   | 1421470_at   | Grpr    | gastrin releasing peptide receptor               | -1.05 | 0.93 | -1.38 | 0.1586 | -1.16 | 0.488  | -1.15 | 0.5574 | 1.54  | 0.4644 |
| 98782_at   | 1421477_at   | Cplx2   | complexin 2                                      | -1.85 | 0    | -1.23 | 0.0734 | -1.26 | 0.0793 | -1.32 | 0.0121 | 1.05  | 0.8498 |
| 98783_at   | 1420786_a_at | Rbmy1a1 | RNA binding motif protein, Y chromosome, f       | 1.12  | 0.63 | 1.23  | 0.0576 | 1.42  | 0.0206 | 1.2   | 0.3967 | -1.62 | 0.1619 |
| 98784_at   | 1449472_at   | Gpr12   | G-protein coupled receptor 12                    | -3.3  | 0    | -1.05 | 0.589  | -1.06 | 0.3903 | -1.19 | 0.0116 | 1.2   | 0.3701 |
| 98786_at   | 1460275_at   | Gpr3    | G-protein coupled receptor 3                     | 1.81  | 0.17 | -1.44 | 0.3128 | -1.19 | 0.5989 | -1.28 | 0.4729 | 1.46  | 0.0964 |
| 98787_at   | 1450515_at   | Kcnj11  | potassium inwardly rectifying channel, subfa     | -2.42 | 0.2  | 1.35  | 0.2947 | 1.1   | 0.6046 | 1.07  | 0.7769 | 1.06  | 0.8877 |
| 98788_at   | 1422220_at   | Pit1    | pituitary specific transcription factor 1        | -2.08 | 0.17 | -1.15 | 0.5689 | -1.13 | 0.6901 | -1.34 | 0.3042 | 1.05  | 0.9092 |
| 98789_at   | 1450140_a_at | Cdkn2a  | cyclin-dependent kinase inhibitor 2A             | -1.37 | 0.54 | -1.1  | 0.7077 | -1.34 | 0.2465 | -1.25 | 0.3994 | 1.74  | 0.2314 |
| 98790_s_at | 1450992_a_at | Meis1   | myeloid ecotropic viral integration site 1       | 4.75  | 0.03 | 1.54  | 0.1466 | 1.45  | 0.3542 | 2.88  | 0      | 3.55  | 0.0989 |
| 98791_at   | 1420454_at   | Rai1    | retinoic acid induced 1                          | -1.51 | 0.13 | -1    | 0.9847 | 1.1   | 0.262  | -1.03 | 0.7159 | -1.03 | 0.7662 |
| 98793_at   | 1419139_at   | Gdf5    | growth differentiation factor 5                  | 1.58  | 0.53 | -1    | 0.9903 | -1.04 | 0.8207 | -1.08 | 0.645  | 1.39  | 0.3751 |
| 98794_at   | 1449287_at   | Srms    | src-related kinase lacking C-terminal regulat    | 1.37  | 0.67 | -1.16 | 0.6261 | 1.09  | 0.8083 | -1.32 | 0.2996 | 2.93  | 0.0242 |
| 98795_at   | 1422202_at   | Thrb    | thyroid hormone receptor beta                    | -1.11 | 0.39 | -1.02 | 0.8438 | -1.24 | 0.1994 | -1.19 | 0.2461 | 1.19  | 0.6291 |
| 98796_at   | 1421039_at   | Mip     | major intrinsic protein of eye lens fiber        | -1.61 | 0.43 | -1.27 | 0.5035 | 1.22  | 0.5813 | -1.45 | 0.3294 | 1.29  | 0.3371 |
| 98797_at   | 1422915_at   | Gast    | gastrin                                          | -1.47 | 0.61 | -1.13 | 0.5264 | 1.23  | 0.2752 | -1.44 | 0.1167 | 1.84  | 0.2376 |
| 98799_g_at | 1423604_at   | Cspg3   | chondroitin sulfate proteoglycan 3               | -1.39 | 0.28 | -1.05 | 0.8846 | -1.44 | 0.1956 | -1.45 | 0.1782 | 2.39  | 0.0701 |
| 98800_at   | 1460042_at   | Slc23a3 | solute carrier family 23 (nucleobase transpo     | -1.49 | 0.14 | -1.38 | 0.0204 | -1.05 | 0.6821 | -1.36 | 0.012  | 1.29  | 0.1085 |
| 98801_at   | 1421304_at   | Klra2   | killer cell lectin-like receptor, subfamily A, m | -1.8  | 0.54 | 1.33  | 0.5904 | 1.02  | 0.9608 | 1.44  | 0.5439 | -1.18 | 0.7262 |
| 98802_at   | 1419431_at   | Ereg    | epiregulin                                       | 1.98  | 0.31 | 1.04  | 0.879  | -1.07 | 0.8313 | -1.18 | 0.5564 | 4.16  | 0.22   |
| 98803_at   | 1420390_s_at | Zfp354a | zinc finger protein 354A                         | -1.39 | 0.65 | 1.78  | 0.0514 | 1.44  | 0.2365 | 1.38  | 0.3283 | 1.99  | 0.0789 |
| 98804_at   | 1420604_at   | Hesx1   | homeo box gene expressed in ES cells             | -1.43 | 0.15 | 1.43  | 0.2823 | 2.15  | 0.1378 | 1.63  | 0.2012 | 3.07  | 0.0224 |
| 98806_s_at | 1450041_a_at | Tub     | tubby candidate gene                             | -1.06 | 0.85 | 1.16  | 0.1527 | 1.19  | 0.1279 | -1.02 | 0.8842 | -1.12 | 0.6352 |
| 98807_at   | 1422907_at   | Gnat2   | guanine nucleotide binding protein, alpha tra    | -1.32 | 0.29 | -1.11 | 0.6237 | -1.02 | 0.912  | -1.13 | 0.5448 | 2.43  | 0.1605 |
| 98808_at   | 1418995_at   | Neurod2 | neurogenic differentiation 2                     | -1.83 | 0.06 | -1.2  | 0.3991 | -1.13 | 0.462  | -1.01 | 0.9286 | -1.15 | 0.6263 |
| 98809_s_at | 1452525_a_at | Nf1     | neurofibromatosis 1                              | -2.36 | 0.17 | -1.09 | 0.701  | -1.03 | 0.9154 | 1.59  | 0.2051 | 1.42  | 0.5662 |
| 98810_at   | 1422196_at   | Htr5b   | 5-hydroxytryptamine (serotonin) receptor 5B      | -1.05 | 0.75 | 1.03  | 0.8317 | 1.04  | 0.7745 | -1.17 | 0.3401 | 1.8   | 0.0687 |
| 98811_at   | 1427313_at   | Ptgir   | prostaglandin I receptor (IP)                    | 1.11  | 0.83 | -1.01 | 0.9695 | -1.29 | 0.1949 | -1.24 | 0.2213 | 1.17  | 0.7304 |
| 98812_at   | 1422283_at   | Tnfsf5  | tumor necrosis factor (ligand) superfamily, r    | 1.12  | 0.83 | 1.32  | 0.2007 | 1.41  | 0.1106 | 1.41  | 0.052  | 1.25  | 0.5514 |
| 98814_at   | 1418221_at   | Csnd    | casein delta                                     | -2.42 | 0.19 | -1.1  | 0.7528 | 1.24  | 0.4899 | -1.13 | 0.7113 | -2.19 | 0.1802 |
| 98815_at   | 1421627_at   | Evx1    | even skipped homeotic gene 1 homolog             | -1.6  | 0.03 | 1.11  | 0.2527 | 1.23  | 0.0235 | 1.06  | 0.4902 | 1.04  | 0.8466 |
| 98817_at   | 1421365_at   | Fst     | follistatin                                      | 1.4   | 0.31 | 1.96  | 0.1098 | 1.27  | 0.4027 | 2.19  | 0.0328 | 1.29  | 0.3739 |
| 98818_at   | 1421866_at   | Nr3c1   | nuclear receptor subfamily 3, group C, mem       | 3.17  | 0    | -1.02 | 0.8676 | -1.22 | 0.338  | -1.24 | 0.1319 | -1.41 | 0.5567 |
| 98820_g_at | 1420573_at   | Hoxd1   | homeo box D1                                     | 1.13  | 0.81 | 1.83  | 0.1369 | -1.11 | 0.8117 | 1.16  | 0.6944 | 1.68  | 0.2451 |
| 98821_at   | 1422173_at   | Ipf1    | insulin promoter factor 1, homeodomain tran      | -3.02 | 0.16 | -1.19 | 0.5193 | 1.68  | 0.2392 | -1.09 | 0.8062 | 1.23  | 0.5895 |
| 98823_at   | 1450503_at   | Kcnj2   | potassium inwardly-rectifying channel, subfa     | -1.44 | 0.62 | -1.15 | 0.381  | 1.09  | 0.5059 | 1.39  | 0.2655 | -1.79 | 0.3391 |
| 98825_at   | 1420672_at   | Kcne1   | potassium voltage-gated channel, Isk-relater     | -2.76 | 0.01 | -1.18 | 0.5611 | 1.04  | 0.8637 | -1.33 | 0.3096 | -1.04 | 0.911  |
| 98826_at   | 1420086_x_at | ---     | ---                                              | -2.85 | 0.16 | 1.25  | 0.4455 | 1.65  | 0.0781 | 1.07  | 0.8224 | -1.32 | 0.4295 |
| 98827_i_at | 1427635_at   | Kif5c   | kinesin family member 5C                         | 1.35  | 0.49 | -1.83 | 0.1561 | 1.08  | 0.8316 | -1.5  | 0.3135 | -1.48 | 0.5531 |
| 98828_at   | 1422046_at   | Iltgam  | integrin alpha M                                 | -1.07 | 0.81 | 1.94  | 0.0605 | 1.09  | 0.5936 | 1.99  | 0.1496 | 1.12  | 0.8143 |
| 98829_at   | 1422871_at   | Kcnj12  | potassium inwardly-rectifying channel, subfa     | -1.06 | 0.92 | 1.47  | 0.1309 | -1.09 | 0.7151 | -1.37 | 0.2154 | -1.15 | 0.6981 |
| 98830_at   | 1418307_a_at | Sbp     | spermine binding protein                         | -1.79 | 0.38 | 1.74  | 0.0139 | 1.75  | 0.123  | 1.67  | 0.0485 | 1.07  | 0.8043 |
| 98831_at   | 1425291_at   | Foxj1   | forkhead box J1                                  | -2.37 | 0.06 | -1.55 | 0.0657 | -1.09 | 0.6211 | -1.35 | 0.147  | 1.28  | 0.4997 |
| 98832_at   | 1420600_at   | Tpo     | thyroid peroxidase                               | 1.21  | 0.69 | -1.14 | 0.5171 | -1.32 | 0.1265 | -1.32 | 0.276  | -1.44 | 0.318  |
| 98833_at   | 1418945_at   | Mmp3    | matrix metalloproteinase 3                       | -2.61 | 0.29 | -1.28 | 0.3246 | -1.41 | 0.2711 | -1.85 | 0.0663 | 1.26  | 0.7328 |
| 98834_at   | 1450501_at   | Iltga2  | integrin alpha 2                                 | -1.74 | 0.14 | 1.19  | 0.3834 | 1.13  | 0.6459 | -1.04 | 0.8442 | 1.35  | 0.067  |
| 98835_at   | 1449865_at   | Sema3a  | sema domain, immunoglobulin domain (Ig),         | -1.79 | 0.36 | 1.35  | 0.1881 | 1.29  | 0.3386 | 1.19  | 0.6303 | -1.23 | 0.5315 |
| 98836_at   | 1449835_at   | Pdcd1   | programmed cell death 1                          | 1.14  | 0.72 | -1.13 | 0.711  | 1.41  | 0.2456 | 1.21  | 0.5738 | 1.44  | 0.3499 |
| 98837_at   | 1448074_at   | Rln1    | Relaxin 1                                        | -1.46 | 0.21 | -1.04 | 0.8107 | 1.16  | 0.372  | 1.19  | 0.1943 | 1.05  | 0.906  |
| 98838_at   | 1421246_at   | Pax9    | paired box gene 9                                | 1.01  | 0.99 | 1.08  | 0.7345 | 1.23  | 0.4319 | -1.11 | 0.7081 | 1.2   | 0.6117 |
| 98839_at   | 1427436_at   | Six2    | sine oculis-related homeobox 2 homolog (D)       | 1.23  | 0.61 | -1.33 | 0.0195 | -1.19 | 0.2399 | -1.37 | 0.0038 | 1     | 0.9791 |
| 98840_at   | 1422084_at   | Bmx     | BMX non-receptor tyrosine kinase                 | -1.15 | 0.64 | -1.05 | 0.8388 | 1.14  | 0.5015 | 1.06  | 0.7871 | 1.25  | 0.6772 |
| 98842_at   | 1456124_x_at | Svs5    | seminal vesicle secretion 5                      | -5.26 | 0.33 | 1.29  | 0.4257 | 1.4   | 0.3284 | -1.02 | 0.8827 | 1.79  | 0.1961 |

|            |              |               |                                               |       |      |       |        |       |        |       |        |       |        |
|------------|--------------|---------------|-----------------------------------------------|-------|------|-------|--------|-------|--------|-------|--------|-------|--------|
| 98843_at   | 1421301_at   | Zic2          | Zic finger protein of the cerebellum 2        | -1.25 | 0.59 | 1.08  | 0.5161 | 2.36  | 0.0947 | 1.37  | 0.446  | 1.47  | 0.3934 |
| 98845_at   | 1426186_a_at | Fgf5          | fibroblast growth factor 5                    | 1.57  | 0.43 | 1.13  | 0.5431 | 1.14  | 0.3255 | 1.17  | 0.3302 | 2.34  | 0.2154 |
| 98846_f_at | 1421638_at   | Psg17         | pregnancy specific glycoprotein 17            | -1.19 | 0.58 | 1.3   | 0.0076 | 1.09  | 0.4868 | 1.14  | 0.2168 | 1.26  | 0.4058 |
| 98847_at   | 1420853_at   | Sdc3          | syndecan 3                                    | -1.56 | 0.23 | -1.04 | 0.8981 | 1.02  | 0.928  | -1.01 | 0.9651 | 1.11  | 0.5566 |
| 98848_at   | 1419329_at   | Sh3d4         | SH3 domain protein 4                          | 1.05  | 0.93 | 2.6   | 0.0345 | 1.46  | 0.4275 | 2.09  | 0.0785 | 1.15  | 0.4028 |
| 98849_at   | 1439964_at   | D8Bwg1414e    | DNA segment, Chr 8, Brigham & Women's C       | -1.25 | 0.41 | 1.13  | 0.18   | 1.32  | 0.0053 | 1     | 0.9935 | 1.29  | 0.1693 |
| 98850_at   | 1420753_at   | Tll1          | tolloid-like                                  | -1.2  | 0.58 | 1.11  | 0.474  | 1.22  | 0.119  | -1.02 | 0.8851 | -1.17 | 0.6036 |
| 98851_at   | 1421409_at   | Msi1h         | Musashi homolog 1(Drosophila)                 | 1.15  | 0.74 | 1     | 0.9961 | 1.04  | 0.8641 | 1.01  | 0.9642 | 1.28  | 0.5908 |
| 98852_at   | 1452386_at   | Sall3         | sal-like 3 (Drosophila)                       | -1.26 | 0.36 | -1.03 | 0.8663 | 1.1   | 0.6671 | -1.1  | 0.7604 | -1.33 | 0.211  |
| 98853_at   | 1450144_at   | Pla2g1br      | phospholipase A2, group IB, pancreas, rece    | -1.4  | 0.39 | 1.24  | 0.2401 | 1.22  | 0.356  | 1.19  | 0.4399 | 2.02  | 0.1391 |
| 98854_at   | 1450499_at   | Sca1          | spinocerebellar ataxia 1 homolog (human)      | -1.5  | 0.26 | -1.12 | 0.4527 | 1.11  | 0.5076 | -1.12 | 0.3333 | 1.87  | 0.0677 |
| 98856_at   | 1422171_at   | Ptgdr         | prostaglandin D receptor                      | 1.37  | 0.5  | -1.12 | 0.686  | -1.17 | 0.7126 | 1.06  | 0.8491 | -1.26 | 0.5797 |
| 98857_at   | 1418047_at   | Neurod6       | neurogenic differentiation 6                  | 3.26  | 0.13 | -1.34 | 0.4845 | -1.69 | 0.1181 | -1.94 | 0.0494 | 1.07  | 0.8607 |
| 98858_at   | 1449908_at   | Gip           | gastric inhibitory polypeptide                | -1.49 | 0.32 | 1.23  | 0.2311 | 1.63  | 0.0021 | 1.29  | 0.0868 | 2.15  | 0.1699 |
| 98859_at   | 1431609_a_at | Acp5          | acid phosphatase 5, tartrate resistant        | 1.06  | 0.77 | -1.09 | 0.1411 | 1.03  | 0.5695 | -1.14 | 0.0153 | -1.13 | 0.322  |
| 98860_at   | 1421500_at   | Sts           | steroid sulfatase                             | -4.54 | 0.14 | 2.04  | 0.0227 | 1.57  | 0.2425 | 1.68  | 0.166  | -1.52 | 0.2879 |
| 98862_at   | 1460657_at   | Wnt10a        | wingless related MMTV integration site 10a    | -1.02 | 0.96 | -1.26 | 0.0075 | -1.09 | 0.1896 | -1.25 | 0.0149 | 1.26  | 0.1007 |
| 98864_s_at | 1423790_a_at | Grik2         | glutamate receptor, ionotropic, kainate 2 (be | -1.79 | 0.03 | -1.25 | 0.4503 | 1.25  | 0.4062 | -1.04 | 0.8976 | 1.22  | 0.4496 |
| 98865_at   | 1418678_at   | Has2          | hyaluronan synthase 2                         | -1.15 | 0.48 | -1.3  | 0.4597 | -1.14 | 0.6562 | -1.6  | 0.2197 | 1.09  | 0.7624 |
| 98866_at   | 1452507_at   | Dlx6          | distal-less homeobox 6                        | -1.53 | 0.37 | -1.55 | 0.1725 | -1.55 | 0.1866 | -1.53 | 0.18   | 1.54  | 0.3528 |
| 98870_at   | 1422938_at   | Bcl2          | B-cell leukemia/lymphoma 2                    | -1.19 | 0.11 | 1.09  | 0.1992 | 1.04  | 0.3992 | 1.08  | 0.0131 | 1.3   | 0.0405 |
| 98871_at   | 1420581_at   | Gpr143        | G protein-coupled receptor 143                | 1.33  | 0.47 | -1.34 | 0.2676 | -1.83 | 0.0246 | -1.17 | 0.53   | -1.79 | 0.1962 |
| 98872_at   | 1419064_a_at | Ugt8          | UDP-glucuronosyltransferase 8                 | -2.59 | 0.31 | 1.21  | 0.567  | -1.03 | 0.941  | -1.51 | 0.2803 | 1.23  | 0.7598 |
| 98873_at   | 1420595_at   | Dlx4          | distal-less homeobox 4                        | 1.93  | 0.1  | -1.29 | 0.4398 | 1.22  | 0.5604 | 1.25  | 0.4511 | -1.23 | 0.6557 |
| 98874_at   | 1421376_at   | Traf6         | Tnf receptor-associated factor 6              | 1.44  | 0.02 | 1.09  | 0.8266 | -1.03 | 0.9267 | 1.22  | 0.5962 | -1.2  | 0.597  |
| 98875_at   | 1423793_at   | D2Ertd391e    | DNA segment, Chr 2, ERATO Doi 391, expr       | 1.19  | 0.35 | 1.1   | 0.0926 | 1.13  | 0.1443 | 1.18  | 0.0252 | -1.19 | 0.2857 |
| 98876_at   | 1417918_at   | Mrpl11        | mitochondrial ribosomal protein L11           | 1.62  | 0.18 | 1.15  | 0.0222 | 1.21  | 0.0355 | 1.14  | 0.0512 | 1.16  | 0.4439 |
| 98880_at   | 1433588_at   | D6Wsu116e     | DNA segment, Chr 6, Wayne State Universi      | -1.14 | 0.42 | -1.14 | 0.1061 | -1.01 | 0.8845 | -1.06 | 0.418  | -1.17 | 0.2135 |
| 98881_at   | 1428507_at   | Hdhd2         | haloacid dehalogenase-like hydrolase doma     | 1.05  | 0.69 | 1.1   | 0.2775 | 1.17  | 0.1096 | 1.08  | 0.2121 | 1.03  | 0.8547 |
| 98884_r_at | 1422568_at   | Ndel1         | nuclear distribution gene E-like homolog 1 (  | 1.54  | 0.18 | 1.82  | 0.0044 | 1.4   | 0.0196 | 1.96  | 0.0051 | 1.37  | 0.243  |
| 98886_at   | 1423767_at   | 2810410M20Rik | RIKEN cDNA 2810410M20 gene                    | -1.3  | 0.07 | 1.05  | 0.6163 | 1.02  | 0.8677 | -1.07 | 0.4676 | 1.4   | 0.0523 |
| 98887_at   | 1448243_at   | Napa          | N-ethylmaleimide sensitive fusion protein att | 1.06  | 0.85 | 1.2   | 0.0212 | 1.11  | 0.2152 | 1.34  | 0      | 1.25  | 0.0362 |
| 98891_at   | 1428217_at   | 1600012H06Rik | RIKEN cDNA 1600012H06 gene                    | 1.67  | 0.39 | -1.12 | 0.2753 | -1.3  | 0.046  | -1.32 | 0.0189 | -1.88 | 0.0669 |
| 98892_at   | 1418288_at   | Lpin1         | lipin 1                                       | 1.39  | 0.12 | -1.87 | 0.0015 | 1.75  | 0.0143 | 1.08  | 0.5811 | 2.04  | 0.0517 |
| 98894_at   | 1426878_at   | 2610016F04Rik | RIKEN cDNA 2610016F04 gene                    | -1.12 | 0.72 | 1.12  | 0.2672 | -1.14 | 0.2248 | 1.06  | 0.5882 | 1.75  | 0.0926 |
| 98896_at   | 1424028_at   | 5830457O10Rik | RIKEN cDNA 5830457O10 gene                    | 1.19  | 0.51 | 1.01  | 0.8447 | -1.02 | 0.7959 | -1.06 | 0.284  | 1.43  | 0.0241 |
| 98905_at   | 1454610_at   | 7-Sep         | septin 7                                      | -1.27 | 0.5  | -1.08 | 0.2203 | -1.05 | 0.6061 | -1.1  | 0.1462 | -1.09 | 0.5915 |
| 98906_at   | 1417480_at   | Fbxo9         | f-box only protein 9                          | 1.1   | 0.58 | -1    | 0.963  | 1.16  | 0.0323 | 1.13  | 0.2912 | -1.03 | 0.7141 |
| 98908_at   | 1451073_at   | Sppl3         | Signal peptide peptidase 3                    | -1.17 | 0.17 | 1.04  | 0.3299 | -1.11 | 0.1653 | -1.1  | 0.1251 | -1.07 | 0.5338 |
| 98909_at   | 1418700_at   | Lias          | lipoic acid synthetase                        | 1.35  | 0.23 | 1.16  | 0.1127 | -1.02 | 0.804  | 1.1   | 0.3265 | -1.07 | 0.7357 |
| 98910_at   | 1436747_at   | 1110014K08Rik | RIKEN cDNA 1110014K08 gene                    | -1.29 | 0.24 | 1.01  | 0.943  | 1.07  | 0.1362 | 1.09  | 0.1443 | -1.15 | 0.0885 |
| 98911_at   | 1433803_at   | Jak1          | Janus kinase 1                                | 1.48  | 0.09 | 1.03  | 0.5936 | -1.03 | 0.3496 | 1.14  | 0.0022 | -1.04 | 0.7359 |
| 98912_at   | 1434597_at   | D13Wsu64e     | DNA segment, Chr 13, Wayne State Univer       | 1.33  | 0.15 | 1.1   | 0.0566 | 1.22  | 0.0775 | 1.13  | 0.0683 | 1.13  | 0.5023 |
| 98914_at   | 1423511_at   | Asf1a         | ASF1 anti-silencing function 1 homolog A (S   | 1.51  | 0.01 | 1.37  | 0.0009 | 1.23  | 0.0885 | 1.36  | 0.0128 | -1.15 | 0.265  |
| 98915_at   | 1429321_at   | Rnf149        | ring finger protein 149                       | -1.39 | 0.34 | 1.04  | 0.6996 | 1.14  | 0.0768 | 1.04  | 0.5362 | 1.36  | 0.2167 |
| 98917_at   | 1416369_at   | 5730414C17Rik | RIKEN cDNA 5730414C17 gene                    | 1.04  | 0.93 | 1.02  | 0.7764 | 1.07  | 0.5102 | -1.03 | 0.62   | -1.17 | 0.2098 |
| 98918_at   | 1451091_at   | Txndc5        | thioredoxin domain containing 5               | -1.31 | 0.06 | -1.07 | 0.4657 | 1.07  | 0.4347 | -1.05 | 0.594  | -1.19 | 0.0332 |
| 98921_at   | 1451134_a_at | 2410018G23Rik | RIKEN cDNA 2410018G23 gene                    | -1.51 | 0.19 | -1.15 | 0.051  | 1.04  | 0.4842 | -1.11 | 0.2459 | -1.19 | 0.0601 |
| 98923_at   | 1416730_at   | Rcl1          | RNA terminal phosphate cyclase-like 1         | 1.42  | 0.05 | 1.3   | 0.0015 | 1.33  | 0      | 1.48  | 0      | 1.33  | 0.0739 |
| 98924_at   | 1452474_a_at | Art3          | ADP-ribosyltransferase 3                      | 1.66  | 0.21 | -1.52 | 0.0122 | -1.24 | 0.2008 | -1.35 | 0.165  | -1.64 | 0.4254 |
| 98926_at   | 1420834_at   | Vamp2         | vesicle-associated membrane protein 2         | 1.21  | 0.53 | 1.31  | 0.0006 | 1.07  | 0.4689 | 1.33  | 0.0034 | 1.12  | 0.2872 |
| 98927_at   | 1448304_a_at | Rab6          | RAB6, member RAS oncogene family              | -1.02 | 0.97 | 1     | 0.9781 | -1.64 | 0.0176 | -1.24 | 0.1583 | 1.17  | 0.3656 |
| 98928_at   | 1448351_at   | Coro1b        | coronin, actin binding protein 1B             | 1.53  | 0.03 | 1.29  | 0.0004 | 1.17  | 0.0734 | 1.45  | 0      | 1.05  | 0.7224 |

|            |              |               |                                                |       |      |       |        |       |        |       |        |       |        |
|------------|--------------|---------------|------------------------------------------------|-------|------|-------|--------|-------|--------|-------|--------|-------|--------|
| 98929_at   | 1423242_at   | Mrps36        | mitochondrial ribosomal protein S36            | 1.77  | 0.05 | -1.13 | 0.08   | 1     | 0.9578 | -1.04 | 0.4816 | 1.08  | 0.536  |
| 98930_at   | 1416384_a_at | Cope          | coatomer protein complex, subunit epsilon      | 1.23  | 0.05 | 1.04  | 0.4024 | 1.1   | 0.1061 | 1.16  | 0.0011 | -1.08 | 0.3956 |
| 98931_at   | 1433546_at   | Gns           | glucosamine (N-acetyl)-6-sulfatase             | 1.76  | 0.1  | 1.03  | 0.7174 | 1.06  | 0.4719 | 1.05  | 0.469  | -1.17 | 0.1283 |
| 98934_at   | 1419352_at   | 0610007P06Rik | RIKEN cDNA 0610007P06 gene                     | -1.04 | 0.77 | -1.18 | 0.1115 | -1.02 | 0.8198 | -1.21 | 0.0418 | -1.39 | 0.2581 |
| 98936_at   | 1452000_s_at | Sars1         | seryl-aminoacyl-tRNA synthetase 1              | 1.59  | 0.1  | 1.09  | 0.3832 | 1.1   | 0.378  | 1.14  | 0.1644 | 1.86  | 0.0569 |
| 98937_at   | 1452648_at   | Tbrg1         | transforming growth factor beta regulated ge   | 1.42  | 0.03 | -1.12 | 0.1009 | -1.17 | 0.0384 | -1.04 | 0.5188 | -1.12 | 0.3899 |
| 98938_at   | 1417427_at   | 1500026D16Rik | RIKEN cDNA 1500026D16 gene                     | 1.31  | 0.53 | 1.01  | 0.8844 | -1.07 | 0.5757 | -1.12 | 0.147  | 1.05  | 0.7554 |
| 98944_at   | 1416059_at   | Sec23b        | SEC23B (S. cerevisiae)                         | -1.17 | 0.52 | -1.26 | 0.0003 | -1.19 | 0.0039 | -1.2  | 0.0056 | -1.35 | 0.002  |
| 98945_at   | 1418010_a_at | Sh3glb1       | SH3-domain GRB2-like B1 (endophilin)           | 1.55  | 0.17 | 1.26  | 0.1667 | 1.17  | 0.3596 | 1.37  | 0.0256 | -1.02 | 0.9373 |
| 98946_at   | 1425241_a_at | Wsb1          | WD repeat and SOCS box-containing 1            | -2.6  | 0.02 | -1.63 | 0.0086 | 1.07  | 0.7326 | -1.51 | 0.0454 | -1.89 | 0.0591 |
| 98948_at   | 1433656_a_at | Gnl3          | guanine nucleotide binding protein-like 3 (nu  | 1.77  | 0.25 | 1.05  | 0.5277 | 1.33  | 0.0038 | 1.08  | 0.3657 | 1.22  | 0.1388 |
| 98950_at   | 1415749_a_at | Rragc         | Ras-related GTP binding C                      | 1.13  | 0.42 | 1.23  | 0.0003 | 1.21  | 0.0004 | 1.34  | 0      | 1.39  | 0.015  |
| 98951_at   | 1437205_at   | ---           | ---                                            | -1.21 | 0.76 | -1.06 | 0.3401 | -1.14 | 0.3231 | -1.22 | 0.1145 | -1.19 | 0.6501 |
| 98952_at   | 1451081_a_at | D8Erdt325e    | DNA segment, Chr 8, ERATO Doi 325, expr        | 1.21  | 0.71 | 1.02  | 0.7683 | 1.01  | 0.9247 | 1.09  | 0.4009 | 1.49  | 0.1598 |
| 98953_at   | 1428272_at   | 1500010M16Rik | RIKEN cDNA 1500010M16 gene                     | -1.02 | 0.88 | -1.05 | 0.5569 | 1.11  | 0.3448 | -1.16 | 0.0674 | 1.11  | 0.3327 |
| 98954_f_at | 1427977_x_at | Oog1          | oogenesis 1                                    | -2.21 | 0.1  | -1.99 | 0.0462 | -1.35 | 0.363  | -1.55 | 0.1485 | 1.02  | 0.9552 |
| 98956_at   | 1423732_at   | Tram1         | translocating chain-associating membrane p     | -1.31 | 0.1  | -1.16 | 0.0057 | -1.06 | 0.2868 | -1.12 | 0.0255 | -2.08 | 0.0048 |
| 98959_at   | 1449821_a_at | 0610016J10Rik | RIKEN cDNA 0610016J10 gene                     | 1.13  | 0.57 | -1    | 0.9802 | 1.15  | 0.2413 | 1.15  | 0.2691 | -1.34 | 0.2019 |
| 98961_at   | 1418736_at   | B3galt3       | UDP-Gal:betaGlcNAc beta 1,3-galactosyltra      | -1.24 | 0.53 | -1.15 | 0.6536 | 1.42  | 0.2775 | 1.34  | 0.2611 | 1.03  | 0.9453 |
| 98962_at   | 1419560_at   | Lipc          | lipase, hepatic                                | -1.26 | 0.25 | -1.72 | 0      | -1.36 | 0.0043 | -2.85 | 0      | -1.76 | 0.0219 |
| 98963_at   | 1416935_at   | Trpv2         | transient receptor potential cation channel, s | -1.01 | 0.99 | 1.43  | 0.0931 | 1.25  | 0.258  | 1.55  | 0.1142 | 1.45  | 0.2902 |
| 98965_at   | 1423960_at   | Groc3f        | gene rich cluster, C3f gene                    | -1.14 | 0.5  | 1.01  | 0.8795 | 1.1   | 0.198  | 1.09  | 0.3685 | -1.18 | 0.1328 |
| 98966_at   | 1449118_at   | Dbt           | dihydrolipoamide branched chain transacyla     | 1.11  | 0.77 | 1.44  | 0.0163 | -1.25 | 0.1488 | 1.34  | 0.0918 | 1.36  | 0.1918 |
| 98967_at   | 1450779_at   | Fabp7         | fatty acid binding protein 7, brain            | 1.54  | 0.26 | -1.66 | 0.0381 | -1.51 | 0.1217 | -2.75 | 0.0007 | -2.24 | 0.3131 |
| 98968_at   | 1419754_at   | Myo5a         | myosin Va                                      | 1.1   | 0.66 | -1.78 | 0.3091 | -1.84 | 0.2916 | -1.33 | 0.6045 | -3.5  | 0.2344 |
| 98969_at   | 1418838_at   | Abcd1         | ATP-binding cassette, sub-family D (ALD), n    | 1.1   | 0.69 | -1.24 | 0.0848 | -1.27 | 0.0201 | -1.27 | 0.0117 | -1.94 | 0.0316 |
| 98970_at   | 1419505_a_at | Ggps1         | geranylgeranyl diphosphate synthase 1          | -1.1  | 0.23 | -1.02 | 0.9203 | -1.17 | 0.4629 | 1.2   | 0.2498 | 1.94  | 0.0664 |
| 98973_at   | 1428390_at   | Wdr43         | WD repeat domain 43                            | -1.41 | 0.41 | 1.19  | 0.1926 | 1.19  | 0.2226 | 1.08  | 0.4794 | 1.08  | 0.8346 |
| 98974_at   | 1455530_at   | Igh-5         | immunoglobulin heavy chain 5 (delta-like he    | -1.83 | 0.51 | 2.78  | 0.0306 | 1.15  | 0.6537 | 2.93  | 0.0209 | 3.75  | 0.1475 |
| 98975_at   | 1424291_at   | Nup93         | nucleoporin 93                                 | -1.4  | 0.64 | 1.09  | 0.6449 | 1.06  | 0.6779 | 1.16  | 0.2548 | 1.2   | 0.6399 |
| 98976_at   | 1419476_at   | Adamdec1      | ADAM-like, decysin 1                           | -1.86 | 0.01 | 2.25  | 0.0822 | 1.3   | 0.4802 | 3.05  | 0.0679 | 2.97  | 0.0018 |
| 98977_at   | 1451163_at   | Tinf2         | Terf1 (TRF1)-interacting nuclear factor 2      | 1.16  | 0.38 | -1.1  | 0.2651 | 1.1   | 0.2796 | -1.03 | 0.7324 | 1.11  | 0.4634 |
| 98979_at   | 1432177_a_at | Mnat1         | menage a trois 1                               | 1.71  | 0.09 | 1.19  | 0.188  | 1.11  | 0.5125 | 1.3   | 0.0589 | 1.66  | 0.0166 |
| 98980_at   | 1419206_at   | Cd37          | CD37 antigen                                   | -1.26 | 0.2  | 1.44  | 0.1317 | 1.32  | 0.1918 | 1.58  | 0.0454 | 1.47  | 0.3354 |
| 98981_s_at | 1427670_a_at | Tcf12         | transcription factor 12                        | 1.74  | 0    | 1.18  | 0.0742 | 1.09  | 0.4616 | 1.2   | 0.0585 | 1.44  | 0.0782 |
| 98982_at   | 1426349_s_at | Tmpo          | thymopoietin                                   | -1.19 | 0.42 | 1.05  | 0.3972 | -1.12 | 0.1371 | -1.05 | 0.4319 | 1.24  | 0.0978 |
| 98983_at   | 1417149_at   | P4ha2         | procollagen-proline, 2-oxoglutarate 4-dioxyg   | -1.26 | 0.19 | -1.07 | 0.2846 | 1.1   | 0.2452 | -1.22 | 0.0202 | 1.91  | 0.0335 |
| 98987_at   | 1418242_at   | Faf1          | Fas-associated factor 1                        | 1.35  | 0.35 | -1.38 | 0.0392 | -1.1  | 0.5137 | -1.23 | 0.1069 | 1.3   | 0.4467 |
| 98988_at   | 1417483_at   | Nfkbiz        | nuclear factor of kappa light polypeptide gen  | 1.2   | 0.43 | 1.31  | 0.0769 | 1.04  | 0.8151 | 1.47  | 0.0233 | 1.33  | 0.418  |
| 98989_at   | 1448619_at   | Dhcr7         | 7-dehydrocholesterol reductase                 | 1.22  | 0.58 | -1.93 | 0.0009 | -1.15 | 0.3811 | -1.68 | 0.0006 | -1.42 | 0.0391 |
| 98990_at   | 1450622_at   | Bcar1         | breast cancer anti-estrogen resistance 1       | 1.39  | 0.36 | 1.05  | 0.7832 | 1.15  | 0.3232 | 1.08  | 0.5183 | -1.31 | 0.5056 |
| 98992_at   | 1417596_at   | Eppb9         | endothelial precursor protein B9               | 1     | 0.99 | -1.29 | 0.3556 | -1.19 | 0.5008 | -1.22 | 0.4894 | 1.5   | 0.3886 |
| 98993_at   | 1425542_a_at | Ppp2r5c       | protein phosphatase 2, regulatory subunit B    | -1.5  | 0.05 | -1.07 | 0.3363 | -1.07 | 0.4204 | -1.13 | 0.1368 | -1.51 | 0.1851 |
| 98994_at   | 1416854_at   | Slc34a2       | solute carrier family 34 (sodium phosphate),   | -4.75 | 0    | -1.73 | 0.1498 | -1.31 | 0.4825 | -1.53 | 0.2472 | -1.09 | 0.7873 |
| 98995_at   | 1460207_s_at | E2f5          | E2F transcription factor 5                     | -1.41 | 0.29 | 1.01  | 0.9445 | 1.14  | 0.2915 | -1    | 0.9839 | 1.1   | 0.7207 |
| 98996_at   | 1419838_s_at | Plk4          | polo-like kinase 4 (Drosophila)                | -1.25 | 0.68 | 1.36  | 0.0845 | 1.21  | 0.3937 | 1.01  | 0.96   | 1.73  | 0.0073 |
| 98998_r_at | 1420409_at   | Krt1-24       | keratin complex 1, acidic, gene 24             | -1.74 | 0.06 | 1.12  | 0.2544 | 1.09  | 0.225  | -1.09 | 0.3563 | 1.61  | 0.016  |
| 98999_at   | 1418372_at   | ---           | ---                                            | 2.03  | 0.04 | 1.05  | 0.5249 | 1.04  | 0.7085 | 1.13  | 0.1591 | -1.17 | 0.2348 |
| 99000_at   | 1418060_a_at | Mapk7         | mitogen activated protein kinase 7             | 1.32  | 0.32 | 1.14  | 0.1854 | 1.47  | 0.0008 | 1.06  | 0.5518 | 1.25  | 0.0656 |
| 99001_at   | 1449515_at   | Zfp292        | zinc finger protein 292                        | -2.16 | 0.33 | -1.23 | 0.0988 | -1.55 | 0.0013 | -1.75 | 0.0001 | 1.17  | 0.4664 |
| 99005_at   | 1448414_at   | Rad1          | RAD1 homolog (S. pombe)                        | 1.92  | 0.17 | 1.12  | 0.5237 | 1.14  | 0.4455 | 1.11  | 0.5087 | -1.01 | 0.9799 |
| 99006_at   | 1430749_at   | 2810040C05Rik | RIKEN cDNA 2810040C05 gene                     | -1.67 | 0.03 | 1.32  | 0.025  | 1.39  | 0.006  | 1.13  | 0.2114 | -1.09 | 0.7978 |
| 99007_at   | 1417544_a_at | Flot2         | flotillin 2                                    | -1.2  | 0.25 | -1.1  | 0.1012 | -1.07 | 0.3921 | -1.11 | 0.0881 | 1.05  | 0.6648 |

|            |              |               |                                                 |       |      |       |        |       |        |       |        |       |        |
|------------|--------------|---------------|-------------------------------------------------|-------|------|-------|--------|-------|--------|-------|--------|-------|--------|
| 99009_at   | 1416105_at   | Nnt           | nicotinamide nucleotide transhydrogenase        | 2.63  | 0.05 | -1.09 | 0.2352 | 1.08  | 0.3773 | 1     | 0.9804 | 1.21  | 0.2336 |
| 99010_at   | 1418450_at   | Islr          | immunoglobulin superfamily containing leuci     | -1.25 | 0.17 | -1.11 | 0.2427 | -1.13 | 0.1815 | -1.11 | 0.2502 | 1.52  | 0.0759 |
| 99011_at   | 1417588_at   | Galnt3        | UDP-N-acetyl-alpha-D-galactosamine:polyp        | 2.77  | 0.03 | -1.06 | 0.8604 | 1.4   | 0.1234 | 1.18  | 0.6241 | 1.46  | 0.2945 |
| 99013_f_at | 1423088_at   | LOC434449     | similar to Ubiquitous tropomodulin (U-Tmod)     | -1.46 | 0.07 | 1.05  | 0.2025 | -1.02 | 0.5619 | 1.01  | 0.8732 | -1    | 0.979  |
| 99014_at   | 1423893_x_at | Apbb1         | amyloid beta (A4) precursor protein-binding,    | -1.85 | 0.07 | -1.41 | 0.0167 | -1.24 | 0.1214 | -1.61 | 0.0055 | -1.87 | 0.02   |
| 99015_at   | 1448757_at   | Pml           | promyelocytic leukemia                          | -1.37 | 0.02 | -1.13 | 0.0875 | -1.12 | 0.0472 | -1.15 | 0.0325 | -1.19 | 0.3264 |
| 99016_at   | 1420103_at   | Sertad2       | SERTA domain containing 2                       | -1.19 | 0.22 | -1.12 | 0.2664 | -1.06 | 0.46   | -1.09 | 0.3712 | 1.16  | 0.3309 |
| 99018_at   | 1428844_a_at | Bclaf1        | BCL2-associated transcription factor 1          | -1.11 | 0.85 | 1.28  | 0.0164 | 1.17  | 0.0652 | 1.19  | 0.1061 | 1.92  | 0.0602 |
| 99019_at   | 1416933_at   | Por           | P450 (cytochrome) oxidoreductase                | 2.1   | 0.02 | -1.15 | 0.0346 | -1.02 | 0.9247 | -1.17 | 0.0929 | 1.82  | 0.163  |
| 99020_at   | 1457834_at   | Yy1           | YY1 transcription factor                        | 2.82  | 0.06 | 1.36  | 0.223  | 1.45  | 0.2471 | 1.27  | 0.3231 | 1.48  | 0.1034 |
| 99021_at   | 1425527_at   | Prrx1         | paired related homeobox 1                       | -1.17 | 0.77 | -1.19 | 0.3105 | -1.01 | 0.9504 | -1.36 | 0.0221 | 1.26  | 0.5066 |
| 99023_at   | 1422791_at   | Pafah1b2      | platelet-activating factor acetylhydrolase, isc | -1.38 | 0.12 | 1.09  | 0.4778 | -1.03 | 0.83   | 1.03  | 0.8294 | 1.01  | 0.9684 |
| 99025_at   | 1417927_at   | Ddx19a        | DEAD (Asp-Glu-Ala-Asp) box polypeptide 1f       | 1.15  | 0    | 1.12  | 0.1158 | 1.14  | 0.1909 | 1.29  | 0.0003 | 1.14  | 0.2191 |
| 99026_at   | 1426050_at   | Bcl2l1        | Bcl2-like 1                                     | -2.69 | 0.34 | -1.3  | 0.3477 | -1.12 | 0.6829 | -1.31 | 0.3754 | 2.01  | 0.1551 |
| 99027_at   | 1420888_at   | Bcl2l1        | Bcl2-like 1                                     | -1.1  | 0.33 | -1.02 | 0.814  | -1.07 | 0.5302 | 1.02  | 0.8344 | -1.09 | 0.4731 |
| 99028_at   | 1424120_at   | Rnf8          | ring finger protein 8                           | 1.57  | 0.15 | 1.04  | 0.6087 | 1.07  | 0.3092 | 1.07  | 0.4562 | -1.03 | 0.8536 |
| 99029_at   | 1422581_at   | Pias1         | protein inhibitor of activated STAT 1           | -1.13 | 0.67 | 1.25  | 0.0299 | 1.13  | 0.133  | 1.2   | 0.1335 | 1.44  | 0.1528 |
| 99030_at   | 1448575_at   | Il7r          | interleukin 7 receptor                          | 1.29  | 0.58 | -1.11 | 0.3419 | 1.03  | 0.8054 | 1.1   | 0.4763 | 2.46  | 0.0225 |
| 99031_at   | 1454763_at   | Ankrd17       | ankyrin repeat domain 17                        | -1.12 | 0.37 | 1.39  | 0.0245 | 1.34  | 0.0978 | 1.38  | 0.0119 | 1.14  | 0.3434 |
| 99033_at   | 1426733_at   | Itpk1         | inositol 1,3,4-triphosphate 5/6 kinase          | -1.07 | 0.34 | 1.05  | 0.2289 | -1.13 | 0.1182 | -1.05 | 0.5462 | -1.06 | 0.5686 |
| 99034_at   | 1418517_at   | Irx3          | Iroquois related homeobox 3 (Drosophila)        | -2.41 | 0.03 | -1.56 | 0.0097 | -1.34 | 0.0692 | -1.54 | 0.0094 | 1.23  | 0.4519 |
| 99036_s_at | 1425393_a_at | Map2k7        | mitogen activated protein kinase kinase 7       | 1.06  | 0.93 | 1.04  | 0.8238 | -1.33 | 0.155  | 1     | 0.9775 | 1.14  | 0.7407 |
| 99037_at   | 1421416_at   | Map2k7        | mitogen activated protein kinase kinase 7       | -1.39 | 0.29 | 1.36  | 0.1044 | 1.12  | 0.398  | 1.42  | 0.2563 | 1.04  | 0.9124 |
| 99039_g_at | 1460726_at   | Adss          | adenylosuccinate synthetase, non muscle         | -1.11 | 0.48 | -1.1  | 0.0148 | -1.14 | 0.0006 | -1.15 | 0.0158 | -1.35 | 0.0319 |
| 99040_at   | 1417150_at   | Slc6a4        | solute carrier family 6 (neurotransmitter tran  | 1.63  | 0.35 | -1.2  | 0.1541 | 1.48  | 0.2743 | -1.17 | 0.0708 | 1.1   | 0.5194 |
| 99043_s_at | 1420559_a_at | Shox2         | short stature homeobox 2                        | -1.48 | 0.06 | -1.17 | 0.1073 | -1.05 | 0.7104 | -1.08 | 0.5087 | 1.43  | 0.2125 |
| 99044_at   | 1451011_at   | Zfp358        | zinc finger protein 358                         | -1.64 | 0.58 | -1.05 | 0.7985 | 1.15  | 0.5281 | 1.06  | 0.7532 | -1.12 | 0.7992 |
| 99045_at   | 1418829_a_at | Eno2          | enolase 2, gamma neuronal                       | -2.3  | 0.12 | -1.28 | 0.3066 | -1.22 | 0.2306 | -1.29 | 0.3178 | -1.05 | 0.8551 |
| 99046_at   | 1421010_at   | Mobp          | myelin-associated oligodendrocytic basic pro    | -1.03 | 0.97 | -2.17 | 0.225  | -2    | 0.2632 | -2.14 | 0.2315 | -1.66 | 0.234  |
| 99048_g_at | 1450088_a_at | Mobp          | myelin-associated oligodendrocytic basic pro    | -1.44 | 0.09 | -1.03 | 0.9378 | -1.56 | 0.213  | -1.61 | 0.1889 | 1.93  | 0.2695 |
| 99049_at   | 1448165_at   | Casp2         | caspase 2                                       | -1.16 | 0.31 | 1.02  | 0.8001 | -1.03 | 0.6642 | 1.08  | 0.3552 | 1.41  | 0.0103 |
| 99050_at   | 1418413_at   | Cav3          | caveolin 3                                      | 1.25  | 0.7  | -1.45 | 0.0816 | 1.12  | 0.5869 | 1.13  | 0.6164 | -1.05 | 0.8754 |
| 99051_at   | 1424542_at   | S100a4        | S100 calcium binding protein A4                 | 1.2   | 0.73 | 2.24  | 0.1208 | 1.33  | 0.4945 | 3.25  | 0.0522 | 1.57  | 0.2688 |
| 99052_at   | 1418926_at   | Zfx1a         | zinc finger homeobox 1a                         | -1.05 | 0.83 | -1.11 | 0.124  | 1.01  | 0.8862 | -1.1  | 0.2364 | 1.22  | 0.1774 |
| 99053_at   | 1448862_at   | Icam2         | intercellular adhesion molecule 2               | -1.09 | 0.8  | 1.13  | 0.5157 | -1.04 | 0.7001 | 1.33  | 0.2469 | 2     | 0.069  |
| 99054_at   | 1416621_at   | Liglh         | lethal giant larvae homolog                     | -1.49 | 0.11 | 1.01  | 0.8622 | -1.06 | 0.4811 | -1.01 | 0.9434 | 1.2   | 0.0122 |
| 99055_at   | 1417616_at   | St6galnac2    | ST6 (alpha-N-acetyl-neuraminylnyl-2,3-beta-ga   | -2.16 | 0.01 | -1.11 | 0.5071 | -1    | 0.9938 | -1.3  | 0.0401 | -1.27 | 0.5347 |
| 99056_at   | 1418713_at   | Pcbd1         | pterin 4 alpha carbinolamine dehydratase/di     | 1.09  | 0.32 | 1.01  | 0.7785 | -1    | 0.9645 | -1.04 | 0.5023 | -1.16 | 0.123  |
| 99057_at   | 1423135_at   | Thy1          | thymus cell antigen 1, theta                    | 3.5   | 0    | -1.31 | 0.4547 | -1.67 | 0.171  | -1.6  | 0.2076 | 1.52  | 0.0892 |
| 99058_at   | 1450780_s_at | Hmga2         | high mobility group AT-hook 2                   | -1.49 | 0.61 | -1.59 | 0.234  | -1.72 | 0.1794 | 1.03  | 0.9497 | 2.8   | 0.1121 |
| 99059_at   | 1416916_at   | Elf3          | E74-like factor 3                               | -1.36 | 0.52 | 1.32  | 0.246  | 1.31  | 0.0227 | 1.53  | 0.0758 | 1.2   | 0.567  |
| 99062_at   | 1417319_at   | Pvrl3         | poliovirus receptor-related 3                   | -1.06 | 0.87 | -1.23 | 0.0395 | 1.11  | 0.3932 | -1.33 | 0.0334 | -1.48 | 0.2069 |
| 99063_at   | 1418089_at   | Stx8          | syntaxin 8                                      | 2.17  | 0.05 | -1.04 | 0.5676 | 1.07  | 0.3761 | 1.01  | 0.8529 | -1.37 | 0.403  |
| 99065_at   | 1419735_at   | Csnk          | casein kappa                                    | -1.88 | 0.3  | 1.09  | 0.8441 | 1.38  | 0.4573 | -1.14 | 0.6687 | 1.03  | 0.9539 |
| 99067_at   | 1417399_at   | Gas6          | growth arrest specific 6                        | 1.15  | 0.59 | -2.15 | 0      | -1.87 | 0      | -2.45 | 0      | -1.77 | 0.0706 |
| 99068_at   | 1415680_at   | Anapc1        | anaphase promoting complex subunit 1            | 1.09  | 0.62 | 1.11  | 0.022  | 1.09  | 0.084  | 1.18  | 0.0024 | 1.02  | 0.8409 |
| 99069_at   | 1420837_at   | Ntrk2         | neurotrophic tyrosine kinase, receptor, type    | -1.17 | 0.57 | -1.14 | 0.2058 | -1.09 | 0.3649 | -1.33 | 0.005  | -1.16 | 0.6568 |
| 99070_at   | 1417091_at   | Chuk          | conserved helix-loop-helix ubiquitous kinase    | -1.08 | 0.75 | -1    | 0.9964 | 1.03  | 0.7152 | -1.06 | 0.4229 | -1.78 | 0.0011 |
| 99071_at   | 1427076_at   | Mpeg1         | macrophage expressed gene 1                     | 1.18  | 0.65 | 1.99  | 0.1774 | -1.33 | 0.0675 | 2.54  | 0.1003 | -1.44 | 0.1679 |
| 99073_at   | 1422513_at   | Ccnf          | cyclin F                                        | -2.17 | 0    | -1    | 0.9951 | -1.05 | 0.2707 | -1.02 | 0.7808 | -1.16 | 0.1022 |
| 99074_at   | 1448837_at   | Vil1          | villin 1                                        | -2.04 | 0.44 | 1.18  | 0.3103 | 4.25  | 0.3672 | 1.6   | 0.2122 | 2.73  | 0.0641 |
| 99077_at   | 1426997_at   | Thra          | thyroid hormone receptor alpha                  | -1.44 | 0.65 | -1.06 | 0.8294 | -1.6  | 0.1253 | 1.15  | 0.5508 | 2.26  | 0.0295 |
| 99078_at   | 1417322_at   | 1110033C18RIk | RIKEN cDNA 1110033C18 gene                      | 1.99  | 0.12 | 1.11  | 0.235  | 1.08  | 0.5575 | 1.02  | 0.8104 | 1.2   | 0.7202 |





|            |              |               |                                                   |       |      |       |        |       |        |       |        |       |        |
|------------|--------------|---------------|---------------------------------------------------|-------|------|-------|--------|-------|--------|-------|--------|-------|--------|
| 99161_at   | 1417423_at   | Grina         | glutamate receptor, ionotropic, N-methyl D-ε      | -1.36 | 0.08 | -1.11 | 0.1515 | -1    | 0.9839 | -1.11 | 0.3558 | -1.23 | 0.0697 |
| 99162_at   | 1429043_at   | Smndc1        | survival motor neuron domain containing 1         | -1.03 | 0.9  | 1.19  | 0.05   | 1.03  | 0.776  | 1.12  | 0.1275 | 1.11  | 0.3475 |
| 99164_at   | 1422797_at   | MGI:1932697   | mitogen activated protein binding protein intr    | 1.38  | 0.25 | 1.03  | 0.6585 | -1.16 | 0.0047 | -1.11 | 0.1209 | -1.06 | 0.736  |
| 99166_at   | 1448540_a_at | 0610012G03Rik | RIKEN cDNA 0610012G03 gene                        | 1.24  | 0.12 | 1.15  | 0.0854 | 1.13  | 0.0046 | 1.19  | 0.0296 | 1.35  | 0.0429 |
| 99167_at   | 1417006_at   | Commd4        | COMM domain containing 4                          | 1.57  | 0.4  | 1.48  | 0.0058 | 1.16  | 0.3244 | 1.41  | 0.0511 | -1.26 | 0.2018 |
| 99168_at   | 1433429_at   | Pigs          | phosphatidylinositol glycan, class S              | -1.37 | 0.04 | -1.02 | 0.7734 | -1.01 | 0.8088 | 1.03  | 0.6643 | -1.2  | 0.0943 |
| 99169_at   | 1419743_s_at | Carm1         | coactivator-associated arginine methyltransf      | 1.07  | 0.73 | -1.1  | 0.2541 | -1.1  | 0.2374 | -1.13 | 0.1619 | 1.05  | 0.7843 |
| 99175_at   | 1450649_at   | Gng10         | guanine nucleotide binding protein (G protei      | -1.12 | 0.67 | -1.29 | 0.0761 | -1.17 | 0.3166 | -1.24 | 0.036  | -1.52 | 0.0045 |
| 99176_at   | 1422516_a_at | Fibp          | fibroblast growth factor (acidic) intracellular l | 1.33  | 0.31 | 1.27  | 0.0002 | 1.27  | 0.0006 | 1.32  | 0.0003 | 1.44  | 0.0845 |
| 99178_at   | 1423091_a_at | Gpm6b         | glycoprotein m6b                                  | -1.18 | 0.81 | 1.37  | 0.0757 | 1.39  | 0.0588 | 1.11  | 0.6089 | 2.21  | 0.1322 |
| 99179_at   | 1431145_a_at | Cuedc2        | CUE domain containing 2                           | 1.47  | 0.06 | 1.14  | 0.1872 | 1.02  | 0.8386 | 1.22  | 0.049  | 1.42  | 0.5587 |
| 99180_at   | 1450873_at   | Gtbbp4        | GTP binding protein 4                             | -1.15 | 0.54 | 1.09  | 0.3683 | 1.08  | 0.347  | 1.12  | 0.1706 | -1.01 | 0.9261 |
| 99182_at   | 1419461_at   | Rpp14         | ribonuclease P 14 subunit (human)                 | -1.7  | 0    | 1.05  | 0.4719 | 1.12  | 0.135  | 1.01  | 0.8585 | 1.03  | 0.7455 |
| 99183_at   | 1433591_at   | AI553587      | expressed sequence AI553587                       | 1.05  | 0.87 | 1.07  | 0.3878 | 1.03  | 0.7223 | 1.05  | 0.3913 | 1.19  | 0.082  |
| 99184_at   | 1427981_a_at | Csdc1         | cysteine sulfinic acid decarboxylase              | -5.05 | 0    | -1.13 | 0.5787 | 2.57  | 0.0238 | -1.38 | 0.1799 | -2.1  | 0.0057 |
| 99185_at   | 1428589_at   | 2810443J12Rik | RIKEN cDNA 2810443J12 gene                        | 1.3   | 0.03 | 1.11  | 0.2202 | 1.2   | 0.0335 | 1.01  | 0.9114 | 1.05  | 0.7778 |
| 99186_at   | 1417910_at   | Ccna2         | cyclin A2                                         | -1.17 | 0.55 | 1.17  | 0.3257 | 1.03  | 0.8463 | 1.15  | 0.3493 | -1.16 | 0.651  |
| 99188_at   | 1451130_at   | 2010315L10Rik | RIKEN cDNA 2010315L10 gene                        | 1.53  | 0.06 | 1.17  | 0.015  | 1.03  | 0.6123 | 1.15  | 0.0836 | 1.31  | 0.0999 |
| 99190_at   | 1434516_at   | Pstk          | phosphoserine-3-kinase                            | 1.51  | 0.13 | 1.11  | 0.2035 | 1.23  | 0.1076 | 1.04  | 0.7229 | 1.05  | 0.918  |
| 99191_at   | 1448405_a_at | Cri1          | CREBBP/EP300 inhibitory protein 1                 | 1.12  | 0.47 | 1.61  | 0.0014 | 1.52  | 0.003  | 1.8   | 0.0007 | 1.97  | 0.0085 |
| 99194_at   | 1452676_a_at | Pnpt1         | polyribonucleotide nucleotidytransferase 1        | 1.55  | 0.02 | 1.02  | 0.8026 | 1.25  | 0.0425 | 1.2   | 0.0132 | -1.07 | 0.5017 |
| 99196_at   | 1428314_at   | Pcnp          | PEST-containing nuclear protein                   | 1.21  | 0.35 | -1.02 | 0.8672 | -1    | 0.9887 | -1.2  | 0.0353 | -1.11 | 0.3    |
| 99197_at   | 1426547_at   | Gc            | group specific component                          | -1.18 | 0.24 | 1.03  | 0.3183 | -1.02 | 0.5535 | -1.03 | 0.3611 | 1.18  | 0.0391 |
| 99236_at   | 1419336_at   | Lcn5          | lipocalin 5                                       | -3.24 | 0.19 | 1.11  | 0.7681 | -1.45 | 0.2772 | 1.67  | 0.2132 | -2    | 0.1667 |
| 99237_at   | 1450362_at   | U55872        | cDNA sequence U55872                              | -1.13 | 0.83 | -1.41 | 0.1607 | 1.1   | 0.7426 | 1.73  | 0.3301 | 1.87  | 0.4654 |
| 99238_at   | 1449159_at   | Gnb3          | guanine nucleotide binding protein, beta 3        | -1.02 | 0.96 | 1.16  | 0.432  | -1.04 | 0.8737 | -1.19 | 0.4914 | 1.55  | 0.319  |
| 99239_at   | 1421341_at   | Axin2         | axin2                                             | -1.26 | 0.66 | -1.13 | 0.4249 | 1.07  | 0.7565 | -1.05 | 0.7434 | 1.16  | 0.6548 |
| 99320_at   | 1421735_a_at | St8sia5       | ST8 alpha-N-acetyl-neuraminide alpha-2,8-s        | -1.57 | 0.22 | -1.5  | 0.0353 | -1.2  | 0.4042 | -1.56 | 0.0358 | -1.35 | 0.2198 |
| 99321_at   | 1421729_a_at | Fert2         | fer (fms/fps related) protein kinase, testis sp   | 1.45  | 0.26 | 1.1   | 0.813  | 1.05  | 0.8869 | -1.13 | 0.7452 | -1.2  | 0.4743 |
| 99322_at   | 1449464_at   | Kcnq1         | potassium voltage-gated channel, subfamily        | 1.12  | 0.86 | -1.54 | 0.0107 | -1.54 | 0.039  | -1.12 | 0.6433 | 1.87  | 0.3519 |
| 99323_at   | 1421623_at   | Il12rb2       | interleukin 12 receptor, beta 2                   | -1.6  | 0.53 | -1.2  | 0.5481 | -1.1  | 0.7471 | -1.01 | 0.9793 | 1.64  | 0.2041 |
| 99324_at   | 1421510_at   | Prss7         | protease, serine, 7 (enterokinase)                | -1.42 | 0.45 | 1.16  | 0.3612 | 1.29  | 0.1425 | -1.09 | 0.7497 | 1.51  | 0.3044 |
| 99326_at   | 1420584_at   | Pla2g2c       | phospholipase A2, group IIC                       | 1.3   | 0.5  | -1.26 | 0.0073 | -1.2  | 0.0232 | -1.18 | 0.0363 | 1.24  | 0.173  |
| 99327_at   | 1419722_at   | Prss19        | protease, serine, 19 (neuropsin)                  | -1.16 | 0.79 | 1.2   | 0.3471 | -1.26 | 0.2507 | 1.02  | 0.8952 | 1.17  | 0.5322 |
| 99328_at   | 1450475_at   | Dlx3          | distal-less homeobox 3                            | 1.3   | 0.59 | -1.3  | 0.3564 | 1.18  | 0.4782 | -1.1  | 0.6731 | -1.49 | 0.1287 |
| 99329_at   | 1421378_s_at | Abcc1         | ATP-binding cassette, sub-family C (CFTR/M        | -1.12 | 0.71 | 1.04  | 0.9027 | -1.06 | 0.8115 | 1.2   | 0.5952 | 1.63  | 0.1401 |
| 99330_at   | 1420703_at   | Csf2ra        | colony stimulating factor 2 receptor, alpha, l    | 1.17  | 0.61 | 1.27  | 0.3332 | 1.01  | 0.9261 | 1.9   | 0.1642 | 1.02  | 0.9506 |
| 99331_at   | 1425968_s_at | Apeg1         | aortic preferentially expressed gene 1            | -1.97 | 0.3  | -1.13 | 0.5832 | 1.04  | 0.9211 | -1.15 | 0.5483 | 3.47  | 0.0212 |
| 99332_at   | 1422121_at   | Oprd1         | opioid receptor, delta 1                          | -2.31 | 0.32 | 1.3   | 0.3022 | 1.12  | 0.7306 | 1.18  | 0.5421 | 1.37  | 0.524  |
| 99333_at   | 1421712_at   | Sele          | selectin, endothelial cell                        | -1.54 | 0.64 | 1.37  | 0.1633 | -1.05 | 0.8281 | 1.48  | 0.054  | 2.23  | 0.4116 |
| 99334_at   | 1425947_at   | Ifng          | interferon gamma                                  | -6.87 | 0.13 | 2.44  | 0.4049 | 1.1   | 0.6577 | 2.07  | 0.3387 | -1.58 | 0.2988 |
| 99335_at   | 1423855_x_at | Rpl17         | ribosomal protein L17                             | 1.31  | 0.47 | 1.18  | 0.2255 | 1.3   | 0.0227 | 1.19  | 0.0678 | 1.32  | 0.0476 |
| 99336_at   | 1416054_at   | Rps5          | ribosomal protein S5                              | 1.19  | 0.05 | 1.19  | 0.0015 | 1.2   | 0.0115 | 1.31  | 0      | 1.73  | 0.0018 |
| 99337_at   | 1435128_at   | Baiap2        | brain-specific angiogenesis inhibitor 1-assoc     | 1.26  | 0.75 | -1.19 | 0.4702 | 1.06  | 0.7251 | 1.06  | 0.7521 | 1.54  | 0.4646 |
| 99339_r_at | 1422835_at   | Kcnd2         | potassium voltage-gated channel, Shal-relat       | -2.21 | 0.37 | 1.79  | 0.2784 | 1.15  | 0.7435 | 1.4   | 0.59   | 2.07  | 0.1665 |
| 99340_at   | 1455168_a_at | Gnb2-rs1      | guanine nucleotide binding protein, beta 2, r     | 1.52  | 0.06 | 1.07  | 0.1919 | 1.21  | 0.0203 | 1.16  | 0.006  | 1.26  | 0.285  |
| 99342_at   | 1449980_a_at | Gabbrd        | gamma-aminobutyric acid (GABA-A) receptc          | -1.62 | 0    | 1.01  | 0.9006 | 1.03  | 0.7208 | 1.02  | 0.8036 | 1.23  | 0.3059 |
| 99345_at   | 1449659_s_at | Mphosph9      | M-phase phosphoprotein 9                          | 1.46  | 0.39 | 1.19  | 0.5864 | 1.26  | 0.4128 | 1.15  | 0.5499 | -1.02 | 0.9377 |
| 99347_f_at | 1419801_x_at | 2700069A02Rik | Echinoderm microtubule associated protein         | 1.08  | 0.87 | 1.09  | 0.4268 | 1.17  | 0.1139 | 1.12  | 0.2552 | -1.04 | 0.8693 |
| 99349_at   | 1421672_at   | Il17          | interleukin 17                                    | -1.5  | 0.54 | 1.08  | 0.8388 | 1     | 0.9973 | 1.25  | 0.5277 | 1.02  | 0.9561 |
| 99350_at   | 1424926_at   | Sec63         | SEC63-like (S. cerevisiae)                        | -2.22 | 0.27 | 1.01  | 0.8975 | -1.14 | 0.3741 | -1.08 | 0.4563 | -1.28 | 0.1156 |
| 99351_at   | 1441146_at   | C76132        | expressed sequence C76132                         | -1.38 | 0.28 | -1.15 | 0.4841 | -1.11 | 0.6648 | -1.49 | 0.1024 | -1.12 | 0.6445 |
| 99354_s_at | 1441394_at   | C76554        | expressed sequence C76554                         | -1.42 | 0.41 | 1.11  | 0.711  | 1.01  | 0.9762 | 1.1   | 0.7456 | 1.39  | 0.3992 |

|            |              |             |                                                  |       |      |       |        |       |        |       |        |       |        |
|------------|--------------|-------------|--------------------------------------------------|-------|------|-------|--------|-------|--------|-------|--------|-------|--------|
| 99356_r_at | 1419864_x_at | Tnpo1       | Transportin 1                                    | 1.07  | 0.77 | -1.21 | 0.4975 | 1.06  | 0.7802 | -1.18 | 0.4829 | 1.47  | 0.094  |
| 99357_at   | 1447956_at   | C76614      | expressed sequence C76614                        | 1.36  | 0.56 | -1.34 | 0.386  | 1.31  | 0.4767 | 1.16  | 0.6113 | 1.31  | 0.4131 |
| 99358_at   | 1442833_at   | D15ErtD30e  | DNA segment, Chr 15, ERATO Doi 30, expr          | -1.34 | 0.35 | 1.22  | 0.1317 | 1.1   | 0.4542 | 1.19  | 0.0917 | 1.42  | 0.5708 |
| 99359_at   | 1440499_at   | D9ErtD26e   | DNA segment, Chr 9, ERATO Doi 26, expr           | 1.31  | 0.29 | 1.35  | 0.0179 | 1.42  | 0.1125 | 1.79  | 0.1025 | 1.34  | 0.2187 |
| 99360_at   | 1440936_at   | D17ErtD141e | DNA segment, Chr 17, ERATO Doi 141, exp          | 1.42  | 0.48 | 1.07  | 0.7238 | 1.1   | 0.6213 | 1.08  | 0.6072 | -1.61 | 0.1078 |
| 99361_at   | 1422228_at   | Wnt8a       | wingless-related MMTV integration site 8A        | -1.02 | 0.94 | 1.14  | 0.6836 | 1.23  | 0.4477 | 1.31  | 0.4244 | 1.46  | 0.1117 |
| 99363_at   | 1443317_at   | D6ErtD47e   | DNA segment, Chr 6, ERATO Doi 47, expr           | -3.01 | 0.2  | -1.95 | 0.1133 | -1.41 | 0.4483 | -2.22 | 0.0467 | 1.32  | 0.3679 |
| 99364_at   | 1425114_at   | Rbbp6       | retinoblastoma binding protein 6                 | 1.41  | 0.38 | 1.06  | 0.5424 | -1.15 | 0.4079 | 1.1   | 0.3335 | 1.83  | 0.3365 |
| 99365_at   | 1436351_at   | Coq3        | coenzyme Q3 homolog, methyltransferase (         | 1.37  | 0.07 | -1.22 | 0.0036 | -1.15 | 0.019  | -1.28 | 0.0009 | -1.39 | 0.0031 |
| 99370_at   | 1426182_a_at | Klrc1       | killer cell lectin-like receptor subfamily C, me | -1.14 | 0.44 | -1.29 | 0.0287 | -1.15 | 0.2168 | -1.08 | 0.4583 | 1.47  | 0.0523 |
| 99371_at   | 1426070_a_at | Kcnd3       | potassium voltage-gated channel, Shal-relat      | -3.01 | 0.26 | 1.3   | 0.4133 | -1.03 | 0.9316 | 1.53  | 0.1482 | -1.44 | 0.5093 |
| 99373_at   | 1422179_at   | Gjb4        | gap junction membrane channel protein bet        | -1.2  | 0.15 | -1.11 | 0.7576 | 1.02  | 0.9333 | -1.1  | 0.7715 | -1.6  | 0.4532 |
| 99375_at   | 1423009_at   | MGI:1928893 | secretory blood group 1                          | 1.43  | 0.27 | -1.5  | 0.0886 | -1.22 | 0.2969 | -1.11 | 0.5519 | 1.23  | 0.6628 |
| 99376_at   | 1421762_at   | Kcnj5       | potassium inwardly-rectifying channel, subfa     | -1.58 | 0.02 | -1.14 | 0.3281 | -1.09 | 0.3541 | -1.08 | 0.4756 | 1.46  | 0.1285 |
| 99377_at   | 1453644_at   | Obp1a       | odorant binding protein 1a                       | -4.37 | 0.37 | -1.52 | 0.4251 | -1.15 | 0.7936 | -1.05 | 0.9136 | 1.36  | 0.7362 |
| 99380_at   | 1422197_at   | Kcna2       | potassium voltage-gated channel, shaker-re       | 1.02  | 0.97 | -1.24 | 0.4026 | -1.14 | 0.6334 | 1.18  | 0.5493 | 2.67  | 0.0835 |
| 99381_at   | 1450359_at   | Fut1        | fucosyltransferase 1                             | 2.39  | 0.24 | 1.33  | 0.0358 | 1.09  | 0.6895 | 1.31  | 0.0536 | 1.34  | 0.1433 |
| 99382_at   | 1421393_at   | Grin2d      | glutamate receptor, ionotropic, NMDA2D (ep       | 1.1   | 0.57 | -1.21 | 0.189  | -1.25 | 0.1009 | -1.21 | 0.1043 | 1.09  | 0.6547 |
| 99384_at   | 1423006_at   | Pim1        | proviral integration site 1                      | -1.09 | 0.78 | 1.04  | 0.711  | -1.28 | 0.0596 | -1.41 | 0.0486 | 1.22  | 0.5625 |
| 99385_at   | 1450831_at   | Pou3f2      | POU domain, class 3, transcription factor 2      | -1.74 | 0.42 | 1.01  | 0.9206 | 1.31  | 0.3282 | -1.07 | 0.3763 | 2.25  | 0.0513 |
| 99386_at   | 1422165_at   | Pou3f4      | POU domain, class 3, transcription factor 4      | -2.7  | 0.39 | 1.04  | 0.7311 | 1.1   | 0.6722 | -1.1  | 0.5395 | -1.15 | 0.4903 |
| 99387_at   | 1450808_at   | Fpr1        | formyl peptide receptor 1                        | 1.11  | 0.77 | -1.08 | 0.7201 | -1.41 | 0.0873 | 1.09  | 0.7447 | 1.32  | 0.6073 |
| 99393_at   | 1421282_at   | Bmp5        | bone morphogenetic protein 5                     | -1.39 | 0.2  | -1.07 | 0.4213 | -1.08 | 0.4664 | -1.36 | 0.0059 | 1.05  | 0.7762 |
| 99398_at   | 1422280_at   | Gzmk        | granzyme K                                       | 1.94  | 0.34 | -1.12 | 0.4441 | 1.18  | 0.5851 | 1.08  | 0.7437 | -1.3  | 0.4618 |
| 99399_at   | 1421690_s_at | Agrp        | agouti related protein                           | -1.4  | 0.09 | 1.18  | 0.0849 | 1.14  | 0.1576 | 1.2   | 0.0652 | 1.24  | 0.2469 |
| 99401_at   | 1422136_at   | Uhmk1       | U2AF homology motif (UHM) kinase 1               | 1.49  | 0.49 | -2.44 | 0.0333 | -1.65 | 0.2645 | -1.59 | 0.2065 | 5.71  | 0.018  |
| 99402_at   | 1420794_at   | Art2b       | ADP-ribosyltransferase 2b                        | -1.43 | 0.66 | -1.59 | 0.2765 | -1.34 | 0.4738 | -2.04 | 0.0743 | 2.53  | 0.1936 |
| 99403_at   | 1423008_at   | Art2a       | ADP-ribosyltransferase 2a                        | -8.75 | 0.24 | -1.33 | 0.4905 | -1.52 | 0.3729 | -2.09 | 0.1212 | 2.62  | 0.2627 |
| 99404_at   | 1422100_at   | Cyp7a1      | cytochrome P450, family 7, subfamily a, poly     | 1.74  | 0.26 | -1.18 | 0.3601 | 1.28  | 0.2664 | -1.87 | 0.0074 | -1.21 | 0.7353 |
| 99405_at   | 1427577_x_at | Igk-V8      | Immunoglobulin kappa chain, constant regio       | -1.05 | 0.74 | -1    | 0.9716 | -1.09 | 0.4588 | -1.02 | 0.8212 | 1.41  | 0.2577 |
| 99406_at   | 1450834_at   | Fut4        | fucosyltransferase 4                             | -1.42 | 0.13 | -1.36 | 0.2853 | -1.46 | 0.2284 | -1.01 | 0.9764 | 1.25  | 0.6322 |
| 99407_at   | 1422199_at   | Omp         | olfactory marker protein                         | -1.25 | 0.15 | -1.4  | 0.3541 | -1.08 | 0.8343 | -1.42 | 0.3343 | 1.07  | 0.7968 |
| 99408_at   | 1421641_at   | Slc6a2      | solute carrier family 6 (neurotransmitter tran   | -2.58 | 0.02 | 1.12  | 0.5744 | -1.43 | 0.1473 | -1.29 | 0.2788 | 1.27  | 0.144  |
| 99410_at   | 1422838_at   | Kcna3       | potassium large conductance pH-sensitive c       | -1.26 | 0.64 | -1.48 | 0.1489 | -1.96 | 0.0389 | -1.51 | 0.1429 | 1.46  | 0.3222 |
| 99411_at   | 1422288_at   | Htr1b       | 5-hydroxytryptamine (serotonin) receptor 1B      | -1.96 | 0.01 | -1.05 | 0.767  | 1.09  | 0.5258 | -1.11 | 0.408  | 1.21  | 0.5962 |
| 99413_at   | 1419609_at   | Ccr1        | chemokine (C-C motif) receptor 1                 | 1.79  | 0.2  | 1.71  | 0.3839 | -1.56 | 0.1811 | 2.49  | 0.1248 | 2.65  | 0.099  |
| 99414_at   | 1450789_at   | Rhpn1       | rhopilin, Rho GTPase binding protein 1           | -1.35 | 0.61 | 1.09  | 0.5196 | 1.47  | 0.089  | 1.08  | 0.5639 | 1.07  | 0.8539 |
| 99415_at   | 1423348_at   | Fzd8        | frizzled homolog 8 (Drosophila)                  | 1.15  | 0.41 | -1.01 | 0.8622 | -1.35 | 0.0059 | -1.15 | 0.0709 | -1.06 | 0.8214 |
| 99416_at   | 1439283_at   | Osbpl9      | Oxysterol binding protein-like 9                 | 2.74  | 0.28 | 2.42  | 0.0076 | -1.51 | 0.3022 | 2.14  | 0.08   | 3.85  | 0.0174 |
| 99417_at   | 1421667_at   | Nmur1       | neuromedin U receptor 1                          | -1.83 | 0.34 | 2.19  | 0.0143 | 1.52  | 0.1886 | 1.75  | 0.0958 | -1.12 | 0.7702 |
| 99419_g_at | 1426334_a_at | Bcl2l11     | BCL2-like 11 (apoptosis facilitator)             | 1.87  | 0.27 | 2.59  | 0.0759 | 2.01  | 0.0476 | 1.87  | 0.0584 | -1.3  | 0.1915 |
| 99423_at   | 1422145_at   | Mgat3       | mannoside acetylglucosaminyltransferase 3        | -1.29 | 0.11 | 1.29  | 0.1686 | 1.13  | 0.2021 | -1.01 | 0.9008 | 1.16  | 0.6442 |
| 99424_at   | 1449958_a_at | Fgf14       | fibroblast growth factor 14                      | -1.47 | 0.55 | -1.09 | 0.3486 | -1.03 | 0.8437 | -1.06 | 0.709  | 1.27  | 0.4379 |
| 99427_at   | 1450553_at   | Hoxd12      | homeo box D12                                    | -2.08 | 0.18 | 1.14  | 0.2024 | 1.53  | 0.0083 | 1.92  | 0.0703 | 1.14  | 0.6516 |
| 99430_at   | 1422942_at   | Galr2       | galanin receptor 2                               | -1.09 | 0.74 | 1.08  | 0.4354 | 1.04  | 0.722  | 1.01  | 0.9021 | 1.36  | 0.0279 |
| 99432_at   | 1422984_at   | ---         | ---                                              | 1.27  | 0.6  | 1.09  | 0.7104 | 1.05  | 0.8869 | 1.89  | 0.0553 | 1.42  | 0.6596 |
| 99433_at   | 1421411_at   | Pstpip2     | proline-serine-threonine phosphatase-intera      | 1.18  | 0.81 | -1.4  | 0.0568 | -1.48 | 0.0508 | -1.65 | 0.006  | -2.3  | 0.0732 |
| 99435_at   | 1422243_at   | Fgf7        | fibroblast growth factor 7                       | -1.34 | 0.25 | -1.01 | 0.9474 | 1.08  | 0.7008 | -1.03 | 0.8733 | 2.07  | 0.1043 |
| 99437_at   | 1450562_at   | Ly6f        | lymphocyte antigen 6 complex, locus F            | -1.43 | 0.37 | -1.2  | 0.6172 | 1.14  | 0.7288 | 1.18  | 0.7322 | 1.53  | 0.3362 |
| 99438_at   | 1457379_at   | C78549      | expressed sequence C78549                        | -1.45 | 0.04 | 1.65  | 0.0291 | 1.16  | 0.5478 | 1.54  | 0.168  | 1.49  | 0.3824 |
| 99440_at   | 1427680_a_at | Nfib        | nuclear factor I/B                               | 1.26  | 0.36 | 1.09  | 0.4035 | -1.08 | 0.3902 | -1.02 | 0.8591 | 1.1   | 0.7503 |
| 99441_at   | 1426462_at   | Gphn        | gephyrin                                         | 1.74  | 0    | 1.01  | 0.8289 | -1.01 | 0.9198 | 1.11  | 0.1054 | -1.38 | 0.0363 |
| 99442_at   | 1417988_at   | Resp18      | regulated endocrine-specific protein 18          | -1.47 | 0.57 | -1.26 | 0.0357 | -1.24 | 0.1558 | -1.28 | 0.0862 | -1.08 | 0.8626 |

|            |              |               |                                                 |        |      |       |        |       |        |       |        |       |        |
|------------|--------------|---------------|-------------------------------------------------|--------|------|-------|--------|-------|--------|-------|--------|-------|--------|
| 99444_at   | 1418187_at   | Ramp2         | receptor (calcitonin) activity modifying protei | 1.02   | 0.8  | -1.19 | 0.2302 | 1.1   | 0.3993 | -1.3  | 0.0759 | 1.88  | 0.0088 |
| 99445_at   | 1428065_at   | 1110028E10Rik | RIKEN cDNA 1110028E10 gene                      | 1.19   | 0.34 | 1.1   | 0.5507 | 1.19  | 0.2253 | 1.11  | 0.5557 | -1.13 | 0.2658 |
| 99446_at   | 1423226_at   | Ms4a1         | membrane-spanning 4-domains, subfamily A        | 1.47   | 0.59 | 1.67  | 0.0437 | 1.18  | 0.6289 | 1.27  | 0.4005 | 2.86  | 0.0277 |
| 99447_at   | 1428528_at   | 1110007L15Rik | RIKEN cDNA 1110007L15 gene                      | -1.9   | 0.24 | 1.13  | 0.2006 | 1.07  | 0.5076 | 1.04  | 0.6933 | 1.4   | 0.1679 |
| 99448_at   | 1448402_at   | Tln1          | talin 1                                         | -1.29  | 0.04 | 1.09  | 0.1502 | -1.09 | 0.4215 | 1.06  | 0.45   | 1.13  | 0.4918 |
| 99449_at   | 1451595_a_at | Kcnq2         | potassium voltage-gated channel, subfamily      | 1.93   | 0.05 | -1.14 | 0.5631 | 1.19  | 0.42   | -1.08 | 0.6992 | 1.17  | 0.6438 |
| 99450_at   | 1420800_a_at | Kcnq2         | potassium voltage-gated channel, subfamily      | -1.71  | 0.03 | -1    | 0.9781 | -1.13 | 0.4445 | -1.63 | 0.0144 | 1.51  | 0.0786 |
| 99451_at   | 1426894_s_at | C230093N12Rik | RIKEN cDNA C230093N12 gene                      | -1.31  | 0.22 | -1.61 | 0.0007 | -1.16 | 0.1173 | -1.38 | 0.0047 | -1.32 | 0.1747 |
| 99452_at   | 1451255_at   | MGI:1927471   | liver-specific bHLH-Zip transcription factor    | -1.36  | 0.03 | -1.75 | 0.0003 | -1.24 | 0.0963 | -1.97 | 0.0001 | -1.26 | 0.0331 |
| 99455_s_at | 1451333_a_at | Acrbp         | proacrosin binding protein                      | -1.18  | 0.62 | 1.01  | 0.9645 | 1.71  | 0.1021 | 1.14  | 0.6971 | 2.06  | 0.0221 |
| 99456_at   | 1422874_at   | Acrbp         | proacrosin binding protein                      | -1.03  | 0.9  | 1.03  | 0.8563 | 1.02  | 0.8507 | 1.02  | 0.8717 | 1.46  | 0.0037 |
| 99457_at   | 1426817_at   | Mki67         | antigen identified by monoclonal antibody Ki    | 11.02  | 0.08 | 2.45  | 0.2058 | 1.11  | 0.7759 | 3.37  | 0.103  | 1.41  | 0.5389 |
| 99460_at   | 1448415_a_at | Sema3b        | sema domain, immunoglobulin domain (Ig),        | -1.35  | 0.25 | -1.09 | 0.4585 | -1.03 | 0.7979 | 1.2   | 0.2806 | 2.46  | 0.3513 |
| 99461_at   | 1418842_at   | Hcls1         | hematopoietic cell specific Lyn substrate 1     | 3.5    | 0.05 | 1.24  | 0.2995 | -1.53 | 0.0244 | 1.2   | 0.5585 | 2.51  | 0.1292 |
| 99462_at   | 1416731_at   | Top2b         | topoisomerase (DNA) II beta                     | 1.69   | 0.11 | -1.07 | 0.3922 | 1.09  | 0.4829 | 1.24  | 0.021  | -1.03 | 0.8493 |
| 99463_at   | 1419523_at   | Cyp3a13       | cytochrome P450, family 3, subfamily a, poly    | 1.54   | 0.11 | -1.14 | 0.1144 | 1     | 0.9644 | 1.04  | 0.6522 | -1.25 | 0.3317 |
| 99464_at   | 1426829_at   | Rxrip110      | retinoid X receptor interacting protein 110     | 1.22   | 0.36 | 1.23  | 0.1646 | 1.29  | 0.0397 | 1.44  | 0.0031 | 1.08  | 0.5284 |
| 99465_at   | 1460246_at   | Mecp2         | methyl CpG binding protein 2                    | 1.42   | 0.3  | 1.07  | 0.3737 | -1.01 | 0.9346 | 1.09  | 0.2928 | 1.74  | 0.0111 |
| 99466_at   | 1452376_at   | 6230401O10Rik | RIKEN cDNA 6230401O10 gene                      | 1.07   | 0.75 | -1.34 | 0.0001 | -1.25 | 0.0285 | -1.43 | 0.0001 | -1.16 | 0.7079 |
| 99467_at   | 1426476_at   | Rasa1         | RAS p21 protein activator 1                     | -1.05  | 0.78 | 1.19  | 0.0761 | 1.19  | 0.2968 | 1.13  | 0.1232 | 1.05  | 0.7772 |
| 99469_at   | 1451226_at   | Pex6          | peroxisomal biogenesis factor 6                 | 1.12   | 0.64 | -1.13 | 0.1673 | 1.02  | 0.826  | -1.23 | 0.0636 | 1.14  | 0.3311 |
| 99471_at   | 1449628_s_at | Stard7        | START domain containing 7                       | 1.33   | 0.37 | 1.12  | 0.0793 | 1.14  | 0.1318 | 1.19  | 0.0661 | -1.05 | 0.6316 |
| 99474_at   | 1424798_a_at | Adam5         | a disintegrin and metalloprotease domain 5      | -3.18  | 0.27 | -1.02 | 0.9748 | -1.22 | 0.4731 | -1.5  | 0.1033 | 1.47  | 0.6053 |
| 99475_at   | 1449109_at   | Socs2         | suppressor of cytokine signaling 2              | -10.57 | 0.05 | -6.98 | 0.0003 | 1.03  | 0.8795 | -7.86 | 0.0003 | -1.98 | 0.0805 |
| 99476_at   | 1427168_a_at | Col14a1       | procollagen, type XIV, alpha 1                  | -1.24  | 0.37 | 1.15  | 0.2501 | 1.11  | 0.381  | 1.08  | 0.5371 | -1.03 | 0.9199 |
| 99478_at   | 1448511_at   | Ptprcap       | protein tyrosine phosphatase, receptor type,    | -1.36  | 0.02 | 1.31  | 0.0015 | 1.1   | 0.2952 | 1.18  | 0.0626 | 1.21  | 0.1095 |
| 99479_at   | 1418287_a_at | Dmbt1         | deleted in malignant brain tumors 1             | -2.22  | 0.38 | -2.2  | 0.3996 | -1.23 | 0.7903 | -2.49 | 0.3457 | 1.96  | 0.0913 |
| 99481_at   | 1427465_at   | Atp1a2        | ATPase, Na+/K+ transporting, alpha 2 polyp      | 1.44   | 0.13 | 1.17  | 0.1916 | 1.02  | 0.8673 | 1.01  | 0.931  | 1.14  | 0.6999 |
| 99485_at   | 1450885_at   | ---           | ---                                             | 1.31   | 0.37 | 1.34  | 0.0036 | 1.25  | 0.0225 | 1.27  | 0.002  | 1.14  | 0.3686 |
| 99488_at   | 1423510_at   | Iapp          | islet amyloid polypeptide                       | -1.45  | 0.31 | 1.28  | 0.1422 | 1.25  | 0.1137 | 1.28  | 0.1497 | -1.17 | 0.2074 |
| 99489_at   | 1418253_a_at | Hspa4l        | heat shock 70kDa protein 4 like                 | 1.57   | 0.33 | -1.64 | 0.0001 | -1.43 | 0.0023 | -1.83 | 0      | -1.21 | 0.2264 |
| 99490_at   | 1423970_at   | Thoc3         | THO complex 3                                   | 1.35   | 0.35 | 1.03  | 0.7714 | -1.16 | 0.2566 | 1.01  | 0.9155 | 1.99  | 0.1569 |
| 99491_at   | 1419455_at   | Il10rb        | interleukin 10 receptor, beta                   | 1.07   | 0.74 | 1.14  | 0.2799 | 1.19  | 0.1081 | 1.29  | 0.2454 | 1.35  | 0.0483 |
| 99493_at   | 1453406_a_at | Rab28         | RAB28, member RAS oncogene family               | 1.03   | 0.89 | 1.18  | 0.0028 | 1.27  | 0.0239 | 1.17  | 0.0477 | 1.13  | 0.5424 |
| 99494_at   | 1448443_at   | Serpini1      | serine (or cysteine) proteinase inhibitor, clac | -1.68  | 0.35 | 1.16  | 0.5427 | -1.27 | 0.3683 | 1.4   | 0.1562 | 1.86  | 0.0675 |
| 99497_at   | 1424240_at   | Arfp2         | ADP-ribosylation factor interacting protein 2   | -1.16  | 0.54 | 1.03  | 0.8459 | 1.08  | 0.4921 | 1.15  | 0.3005 | 1.06  | 0.8277 |
| 99499_at   | 1419122_at   | Mettl1        | methyltransferase-like 1                        | 1.2    | 0.26 | -1.06 | 0.5278 | -1.17 | 0.2998 | -1.12 | 0.4379 | 1.02  | 0.9328 |
| 99500_at   | 1417622_at   | Slc12a2       | solute carrier family 12, member 2              | 1.22   | 0.44 | 1.14  | 0.1497 | -1.13 | 0.4103 | -1.13 | 0.3533 | -1.02 | 0.9259 |
| 99502_at   | 1449069_at   | Zfp148        | zinc finger protein 148                         | -1.47  | 0.59 | 1.1   | 0.5801 | -1.3  | 0.1253 | -1.24 | 0.218  | 1.29  | 0.2434 |
| 99503_at   | 1455958_s_at | 9130017A15Rik | RIKEN cDNA 9130017A15 gene                      | 1.66   | 0.25 | -1.04 | 0.7022 | 1.59  | 0.0302 | 1.25  | 0.164  | 1.93  | 0.0855 |
| 99504_at   | 1451008_at   | St8sia3       | ST8 alpha-N-acetyl-neuraminide alpha-2,8-s      | 1.1    | 0.52 | -1.46 | 0.1153 | 1.05  | 0.8044 | -1.03 | 0.8867 | -1.11 | 0.6653 |
| 99505_at   | 1451643_a_at | Rab4b         | RAB4B, member RAS oncogene family               | 1.12   | 0.78 | -1.05 | 0.3477 | -1.08 | 0.4863 | -1.08 | 0.3504 | 1.14  | 0.5408 |
| 99506_at   | 1451453_at   | Dapk2         | death-associated kinase 2                       | -1.42  | 0.08 | -1.27 | 0.0024 | 1.04  | 0.3906 | -1.29 | 0.0003 | 1.11  | 0.3747 |
| 99507_at   | 1418197_at   | Ucp1          | uncoupling protein 1 (mitochondrial, proton c   | -1.11  | 0.53 | -1.41 | 0.4923 | -1.34 | 0.5731 | -1.6  | 0.3753 | 1.27  | 0.6291 |
| 99508_at   | 1419200_at   | Fxyd7         | FXYP domain-containing ion transport regul      | -1.24  | 0.4  | -1.21 | 0.2002 | -1.04 | 0.8339 | -1.11 | 0.446  | 2.06  | 0.0586 |
| 99509_s_at | 1425750_a_at | Jak3          | Janus kinase 3                                  | -1.97  | 0.11 | 1.08  | 0.1199 | -1.14 | 0.0637 | -1.01 | 0.8007 | -1.37 | 0.0221 |
| 99510_at   | 1460419_a_at | Prkcb1        | protein kinase C, beta 1                        | 1.05   | 0.73 | -1.09 | 0.5313 | -1.09 | 0.2798 | -1.12 | 0.2655 | 1.5   | 0.1228 |
| 99512_at   | 1434251_at   | Cnot1         | CCR4-NOT transcription complex, subunit 1       | 1.1    | 0.5  | 1.15  | 0.1267 | 1.39  | 0.0019 | 1.22  | 0.0594 | -1.1  | 0.5289 |
| 99513_at   | 1448558_a_at | Pla2g4a       | phospholipase A2, group IVA (cytosolic, calc    | 1.98   | 0.11 | 1.48  | 0.2024 | 1.01  | 0.9564 | 1.31  | 0.4462 | -1.56 | 0.2831 |
| 99514_at   | 1428669_at   | Bmyc          | brain expressed myelocytomatosis oncogen        | -1.72  | 0.36 | -1.65 | 0.0071 | -1.11 | 0.3757 | -1.84 | 0.0005 | -4.94 | 0.0002 |
| 99516_at   | 1422522_at   | ---           | ---                                             | 1.01   | 0.99 | -1.01 | 0.9546 | 1.04  | 0.7494 | 1.08  | 0.7141 | -1.67 | 0.1914 |
| 99518_at   | 1418454_at   | Mfap5         | microfibrillar associated protein 5             | -1.16  | 0.76 | 1.09  | 0.6763 | -1.19 | 0.5207 | -1.72 | 0.0596 | 1.07  | 0.9283 |
| 99521_at   | 1421830_at   | Ak3l1         | adenylate kinase 3 alpha-like 1                 | 2.34   | 0.19 | 1.42  | 0.0227 | 1.35  | 0.0143 | 1.67  | 0.0015 | 1.78  | 0.0132 |



|            |              |               |                                               |       |      |       |        |       |        |       |        |       |        |
|------------|--------------|---------------|-----------------------------------------------|-------|------|-------|--------|-------|--------|-------|--------|-------|--------|
| 99607_at   | 1423149_at   | Skp1a         | S-phase kinase-associated protein 1A          | 1.06  | 0.8  | 1.05  | 0.646  | -1.57 | 0.0015 | -1.34 | 0.0658 | -1.41 | 0.0003 |
| 99608_at   | 1430979_a_at | Prdx2         | peroxiredoxin 2                               | 1.94  | 0.01 | 1.58  | 0.0427 | 1.27  | 0.2759 | 1.58  | 0.0265 | 1.36  | 0.3783 |
| 99610_at   | 1419360_a_at | Ss18          | synovial sarcoma translocation, Chromosom     | 1.38  | 0.07 | 1.14  | 0.1948 | 1.09  | 0.4581 | 1.08  | 0.4111 | -1.07 | 0.4455 |
| 99613_at   | 1448486_at   | Mut           | methylmalonyl-Coenzyme A mutase               | 1.15  | 0.12 | 1.32  | 0.0016 | 1.16  | 0.063  | 1.32  | 0.0192 | -1.2  | 0.2289 |
| 99616_s_at | 1423133_at   | 0610040D20Rik | RIKEN cDNA 0610040D20 gene                    | -1.1  | 0.82 | 1.39  | 0.0021 | 1.29  | 0.121  | 1.38  | 0.0036 | 1.17  | 0.4103 |
| 99617_at   | 1452147_at   | Sec24c        | SEC24 related gene family, member C (S. c     | -1.04 | 0.78 | 1.08  | 0.0928 | 1.03  | 0.7011 | 1.09  | 0.038  | 1     | 0.9459 |
| 99618_at   | 1448292_at   | Uqcr          | ubiquinol-cytochrome c reductase (6.4kD) s    | -1.01 | 0.99 | 1.17  | 0.0289 | 1.08  | 0.1089 | 1.16  | 0.0568 | -1.21 | 0.3237 |
| 99619_at   | 1438790_x_at | Tmem41b       | transmembrane protein 41B                     | -1    | 0.98 | -1.31 | 0.0276 | -1.15 | 0.2221 | -1.41 | 0.0077 | -1.37 | 0.0107 |
| 99620_at   | 1423796_at   | Sfpq          | splicing factor proline/glutamine rich (poly  | 1.06  | 0.89 | 1.1   | 0.7244 | 1.11  | 0.7039 | 1.6   | 0.0087 | 1.22  | 0.6788 |
| 99622_at   | 1417394_at   | Klf4          | Kruppel-like factor 4 (gut)                   | -1.26 | 0.58 | 1.07  | 0.6801 | -1.01 | 0.9634 | -1.09 | 0.6269 | 1.51  | 0.324  |
| 99623_s_at | 1426562_a_at | Olfm1         | olfactomedin 1                                | 1.07  | 0.84 | 1.38  | 0.2401 | 1.05  | 0.9073 | 1.28  | 0.3493 | 1.2   | 0.3654 |
| 99624_at   | 1427108_at   | 9530068E07Rik | RIKEN cDNA 9530068E07 gene                    | -1.2  | 0.09 | -1.25 | 0.0002 | -1.16 | 0.0696 | -1.21 | 0.0022 | -1.19 | 0.1091 |
| 99629_at   | 1416555_at   | ---           | ---                                           | 1.41  | 0.19 | -1    | 0.9978 | -1.27 | 0.0089 | -1.23 | 0.0137 | -1.81 | 0.0223 |
| 99630_at   | 1448699_at   | Mrpl54        | mitochondrial ribosomal protein L54           | 1.68  | 0.24 | 1.3   | 0.0393 | 1.22  | 0.1319 | 1.46  | 0.0153 | -1.18 | 0.6123 |
| 99633_at   | 1416853_at   | Ncdn          | neurochondrin                                 | 1.05  | 0.8  | 1.09  | 0.4991 | 1.16  | 0.1951 | 1.16  | 0.2889 | -1.05 | 0.8771 |
| 99635_at   | 1460728_s_at | Ing4          | inhibitor of growth family, member 4          | -1.45 | 0.01 | -1.07 | 0.4574 | -1.1  | 0.3045 | -1.29 | 0.0009 | 1.22  | 0.13   |
| 99636_at   | 1422732_at   | Poldip2       | polymerase (DNA-directed), delta interacti    | 1.24  | 0.12 | 1.1   | 0.0608 | 1.14  | 0.0112 | 1.2   | 0.0049 | 1.05  | 0.3647 |
| 99637_at   | 1448755_at   | Col15a1       | procollagen, type XV                          | 1.12  | 0.75 | -2.28 | 0      | -2.74 | 0      | -5.98 | 0      | -6.9  | 0.0001 |
| 99638_at   | 1426955_at   | Col18a1       | procollagen, type XVIII, alpha 1              | -1.1  | 0.6  | 1.12  | 0.0878 | 1.04  | 0.5143 | 1.07  | 0.0758 | -1.08 | 0.1917 |
| 99639_at   | 1448230_at   | Usp10         | ubiquitin specific protease 10                | -1.16 | 0.22 | 1.41  | 0.0011 | 1.34  | 0.0085 | 1.45  | 0.0003 | -1.32 | 0.0154 |
| 99640_at   | 1423265_at   | Minpp1        | multiple inositol polyphosphate histidine pho | 1.08  | 0.88 | 1.27  | 0.0218 | 1.29  | 0.0051 | 1.42  | 0.0107 | 1.02  | 0.9266 |
| 99641_at   | 1451431_a_at | D2Bwg0891e    | DNA segment, Chr 2, Brigham & Women's C       | 4.01  | 0.01 | -1.09 | 0.4178 | 1.06  | 0.4399 | -1.11 | 0.3294 | 1.05  | 0.8945 |
| 99643_f_at | 1415949_at   | Cpe           | carboxypeptidase E                            | 10.62 | 0.02 | -1.05 | 0.9146 | -2.09 | 0.1814 | 1.1   | 0.8155 | 1.84  | 0.3277 |
| 99644_at   | 1448672_a_at | Zfp289        | zinc finger protein 289                       | -1.09 | 0.66 | 1.02  | 0.7552 | 1.12  | 0.066  | 1.11  | 0.1459 | 1.38  | 0.0159 |
| 99645_at   | 1428125_at   | 4921506J03Rik | RIKEN cDNA 4921506J03 gene                    | -1.03 | 0.93 | -1.03 | 0.6241 | -1.11 | 0.303  | -1.17 | 0.0475 | -1.29 | 0.2414 |
| 99647_at   | 1416705_at   | Rpe           | ribulose-5-phosphate-3-epimerase              | -1.51 | 0.19 | 1.15  | 0.3632 | 1.13  | 0.4351 | -1.07 | 0.7186 | -1.08 | 0.7635 |
| 99649_at   | 1455959_s_at | D9Wsu168e     | DNA segment, Chr 9, Wayne State Universi      | -1.54 | 0.05 | 1.53  | 0      | 1.48  | 0.0024 | 1.72  | 0.0028 | -1.24 | 0.0864 |
| 99650_at   | 1424827_a_at | Csnk1a1       | casein kinase 1, alpha 1                      | 1.01  | 0.93 | -1.02 | 0.7454 | -1.07 | 0.3691 | -1.1  | 0.0817 | -1.07 | 0.3968 |
| 99651_at   | 1460697_s_at | 2610209M04Rik | RIKEN cDNA 2610209M04 gene                    | 1.26  | 0.56 | 1.47  | 0.014  | 1.23  | 0.1864 | 1.82  | 0      | 1.11  | 0.3209 |
| 99652_at   | 1460709_a_at | Bat5          | HLA-B associated transcript 5                 | -1.05 | 0.84 | -1.02 | 0.7144 | -1.07 | 0.4506 | 1.02  | 0.7578 | 1.11  | 0.5387 |
| 99653_at   | 1438626_x_at | Rpl14         | ribosomal protein L14                         | -1.12 | 0.49 | -1.13 | 0.0536 | -1.02 | 0.6642 | -1.12 | 0.0946 | -1.57 | 0.2139 |
| 99654_s_at | 1434227_at   | ---           | ---                                           | -2.14 | 0.21 | -1.65 | 0.0691 | -1.39 | 0.1627 | -1.35 | 0.1165 | 1.18  | 0.3984 |
| 99655_at   | 1418223_at   | Sec1111       | Sec11-like 1 (S. cerevisiae)                  | 1.16  | 0.25 | -1.31 | 0.0001 | -1.07 | 0.1772 | -1.18 | 0.03   | -1.44 | 0.0172 |
| 99656_at   | 1451249_at   | D8Erd812e     | DNA segment, Chr 8, ERATO Doi 812, expr       | -1.12 | 0.79 | 1.04  | 0.3273 | 1.08  | 0.0766 | 1.15  | 0.0308 | -1.01 | 0.9842 |
| 99659_r_at | 1419547_at   | Fahd1         | fumarylacetoacetate hydrolase domain conti    | -1.1  | 0.85 | 1.68  | 0.0152 | 1.71  | 0.0408 | 1.58  | 0.0326 | 1.16  | 0.5401 |
| 99661_r_at | 1448112_at   | Cox7c         | cytochrome c oxidase, subunit VIIc            | -1.22 | 0.33 | -1.02 | 0.7908 | 1.06  | 0.4285 | -1.04 | 0.5263 | 1.22  | 0.031  |
| 99664_at   | 1416073_a_at | Pcnt1         | pericentrin 1                                 | -1.88 | 0.42 | 1.97  | 0.138  | 1.87  | 0.1932 | 1.87  | 0.1991 | 2.14  | 0.215  |
| 99665_at   | 1416007_at   | Satb1         | special AT-rich sequence binding protein 1    | 1.01  | 0.96 | 1.05  | 0.7009 | -1.09 | 0.5199 | 1.16  | 0.2224 | 1.47  | 0.1249 |
| 99666_at   | 1450667_a_at | Cs            | citrate synthase                              | -1.16 | 0.3  | -1.28 | 0.0007 | -1.03 | 0.616  | -1.22 | 0.0058 | -1.54 | 0.0004 |
| 99667_at   | 1417607_at   | Cox6a2        | cytochrome c oxidase, subunit VI a, polypep   | -2.72 | 0.06 | -3.39 | 0.125  | -2.47 | 0.2019 | -3.39 | 0.1234 | 1.51  | 0.2742 |
| 99669_at   | 1419573_a_at | Lgals1        | lectin, galactose binding, soluble 1          | 2.97  | 0.01 | 1.83  | 0.0012 | 1.02  | 0.8461 | 1.83  | 0.0002 | 1.5   | 0.0565 |
| 99670_at   | 1416583_at   | Bad           | Bcl-associated death promoter                 | 1.42  | 0.62 | -1.18 | 0.2981 | -1.05 | 0.806  | -1.09 | 0.4728 | 1.5   | 0.5281 |
| 99671_at   | 1417867_at   | Adn           | adipsin                                       | -2.12 | 0.12 | -5.95 | 0.15   | -4.04 | 0.1914 | -5.52 | 0.1558 | -1.47 | 0.5171 |
| 99672_at   | 1448161_a_at | Clcn4-2       | chloride channel 4-2                          | -1.09 | 0.77 | -1.16 | 0.0443 | -1.07 | 0.438  | -1.35 | 0.01   | -1.42 | 0.4428 |
| 99674_at   | 1415681_at   | Mrpl43        | mitochondrial ribosomal protein L43           | 1.28  | 0.17 | 1.03  | 0.7213 | 1.04  | 0.4897 | 1.02  | 0.7686 | -1.06 | 0.755  |
| 99675_at   | 1423940_at   | Yif1          | Yip1 interacting factor homolog (S. cerevisia | 1.44  | 0.18 | -1.08 | 0.5385 | -1.01 | 0.8995 | -1.26 | 0.0498 | 1.06  | 0.6734 |
| 99677_at   | 1450057_at   | 2610042O14Rik | RIKEN cDNA 2610042O14 gene                    | 1.01  | 0.94 | -1.01 | 0.8486 | -1.02 | 0.6855 | -1.05 | 0.2678 | -1.04 | 0.7994 |
| 99681_at   | 1420223_at   | ---           | ---                                           | 1.13  | 0.74 | 1.37  | 0.2096 | 1.82  | 0.054  | -1.14 | 0.5624 | 1.13  | 0.726  |
| 99699_at   | 1427828_at   | ---           | Murine retrovirus readthrough RNA sequenc     | 1.28  | 0.57 | 1.31  | 0.4041 | 1.12  | 0.3774 | 1.37  | 0.1965 | 1.23  | 0.7818 |
| 99700_at   | 1421719_at   | V2r1b         | vomeroneasal 2, receptor, 1b                  | -1.46 | 0.52 | -1.46 | 0.0468 | -1.3  | 0.206  | -1.74 | 0.0125 | 1.67  | 0.1568 |
| 99702_at   | 1450617_at   | ---           | ---                                           | -1.74 | 0.05 | -1.08 | 0.7735 | 1.09  | 0.7542 | 1.13  | 0.6296 | 1.44  | 0.0746 |
| 99708_at   | 1449805_at   | lsp2          | Implantation serine protease 2                | -3.44 | 0.07 | -1.68 | 0.1603 | 1.14  | 0.7623 | -1.42 | 0.3086 | -1.13 | 0.7837 |
| 99779_at   | 1446244_at   | D6Bwg1452e    | DNA segment, Chr 6, Brigham & Women's C       | -1.06 | 0.55 | -1.05 | 0.7117 | -1.1  | 0.4219 | 1.06  | 0.5657 | 1.33  | 0.4251 |

|            |              |                        |                                                                              |       |      |         |        |       |        |         |        |       |        |
|------------|--------------|------------------------|------------------------------------------------------------------------------|-------|------|---------|--------|-------|--------|---------|--------|-------|--------|
| 99799_at   | 1422932_a_at | Vav1                   | vav 1 oncogene                                                               | -1.02 | 0.95 | 1.87    | 0.1248 | -1.08 | 0.7982 | 2.56    | 0.1872 | 1.45  | 0.1092 |
| 99800_at   | 1421958_at   | L1cam                  | L1 cell adhesion molecule                                                    | -1.01 | 0.98 | 1.05    | 0.8652 | 1.13  | 0.6555 | 1.3     | 0.3863 | 2.16  | 0.0376 |
| 99801_at   | 1422058_at   | Nodal                  | nodal                                                                        | 1.1   | 0.81 | 1.09    | 0.5166 | 1.07  | 0.5242 | 1.04    | 0.6966 | -1.06 | 0.8403 |
| 99802_at   | 1450003_at   | Adra2b                 | adrenergic receptor, alpha 2b                                                | -1.36 | 0.62 | 1.98    | 0.048  | 1.14  | 0.6047 | 1.15    | 0.5588 | 1.03  | 0.9015 |
| 99804_at   | 1422335_at   | Adra2c                 | adrenergic receptor, alpha 2c                                                | -1.48 | 0.45 | -1.09   | 0.3201 | -1.05 | 0.5981 | -1.15   | 0.3105 | 1.96  | 0.0375 |
| 99806_at   | 1450286_at   | Npr3                   | natriuretic peptide receptor 3                                               | -2.77 | 0.23 | -1.34   | 0.3908 | -1.02 | 0.9659 | 1.12    | 0.7752 | -3.59 | 0.2316 |
| 99807_r_at | 1422279_at   | Fv1                    | Friend virus susceptibility 1                                                | -1.29 | 0.62 | -1.16   | 0.6852 | -1.76 | 0.0619 | 1.05    | 0.8589 | 1.14  | 0.7807 |
| 99808_at   | 1419576_at   | Hoxb13                 | homeo box B13                                                                | -1.26 | 0.66 | -1.17   | 0.1494 | -1.07 | 0.5414 | -1.05   | 0.6487 | -1.72 | 0.1383 |
| 99810_at   | 1449279_at   | Gpx2                   | glutathione peroxidase 2                                                     | -1.05 | 0.85 | -1.12   | 0.1602 | -1.08 | 0.3747 | -1.2    | 0.031  | 1.4   | 0.1433 |
| 99811_at   | 1422347_at   | Npy6r                  | neuropeptide Y receptor Y6                                                   | -1.83 | 0.07 | -1.2    | 0.141  | 1.07  | 0.5042 | -1.29   | 0.0446 | -1.24 | 0.468  |
| 99813_g_at | 1426043_a_at | Capn3                  | calpain 3                                                                    | 1.48  | 0.38 | -1.28   | 0.3147 | 1.26  | 0.3151 | 1.17    | 0.3471 | 1.39  | 0.3698 |
| 99814_at   | 1422312_a_at | Neurog3                | neurogenin 3                                                                 | -2.48 | 0.06 | -1.01   | 0.9636 | 1.13  | 0.3067 | -1.1    | 0.3377 | 1.43  | 0.1277 |
| 99816_at   | 1417101_at   | Hspa2                  | heat shock protein 2                                                         | -1.13 | 0.8  | 1.81    | 0.0562 | 1.5   | 0.1393 | 1.98    | 0.0127 | 1.96  | 0.2623 |
| 99817_at   | 1450303_at   | Vax2                   | ventral anterior homeobox containing gene 2                                  | -1.95 | 0.23 | 1.03    | 0.9342 | -1.01 | 0.98   | -1.05   | 0.8803 | 1.06  | 0.9166 |
| 99818_at   | 1442597_at   | C79122                 | expressed sequence C79122                                                    | -2.17 | 0.37 | 1.11    | 0.5058 | -1.12 | 0.4424 | -1.14   | 0.2988 | -1.27 | 0.596  |
| 99819_at   | 1442932_at   | C79709                 | expressed sequence C79709                                                    | -3.77 | 0.12 | -1.66   | 0.0152 | -1.04 | 0.8043 | -1.27   | 0.2584 | 1.59  | 0.1233 |
| 99821_at   | 1443711_at   | Chd8                   | Chromodomain helicase DNA binding protein 8                                  | -1.28 | 0.63 | -1.01   | 0.9256 | -1.01 | 0.9529 | -1.05   | 0.72   | 1.22  | 0.3132 |
| 99824_at   | 1457521_at   | ---                    | ---                                                                          | -1.76 | 0.17 | 1.5     | 0.1647 | 1.19  | 0.5748 | 1.19    | 0.4382 | 1.09  | 0.7501 |
| 99826_at   | 1419861_at   | ---                    | Transcribed locus                                                            | -3.81 | 0.15 | 1.3     | 0.684  | 1.03  | 0.9432 | 1.27    | 0.5496 | -1.06 | 0.9129 |
| 99827_at   | 1429999_at   | 4933403M19RI           | RIKEN cDNA 4933403M19 gene                                                   | -3.58 | 0.02 | -1.43   | 0.2274 | -1.02 | 0.9531 | -1.57   | 0.1319 | -1.39 | 0.4282 |
| 99828_at   | 1456430_at   | D3Ert789e              | DNA segment, Chr 3, ERATO Doi 789, expressed                                 | 1.12  | 0.77 | 1.07    | 0.6958 | 1.68  | 0.0288 | 1.44    | 0.0144 | 1.61  | 0.3056 |
| 99830_at   | 1436066_at   | Kalrn                  | kalirin, RhoGEF kinase                                                       | -1.05 | 0.93 | 1.04    | 0.9153 | -1.29 | 0.4737 | 1.09    | 0.7753 | -1.43 | 0.3605 |
| 99831_at   | 1449820_at   | Cort                   | cortistatin                                                                  | -1.07 | 0.93 | 1.02    | 0.9501 | 1.03  | 0.9305 | -1.13   | 0.6143 | -1.03 | 0.9097 |
| 99832_at   | 1421400_at   | Kcnmb1                 | potassium large conductance calcium-activated                                | 1.2   | 0.58 | -1.57   | 0.0036 | -1.49 | 0.0115 | -1.8    | 0.0007 | 1.72  | 0.2236 |
| 99833_at   | 1422876_at   | Capn9                  | calpain 9 (nCL-4)                                                            | -1.07 | 0.67 | -1.38   | 0.0927 | -1.01 | 0.9192 | -1.45   | 0.0683 | 1.39  | 0.2027 |
| 99834_at   | 1460289_at   | Nrg3                   | neuregulin 3                                                                 | -1.49 | 0.56 | -1.18   | 0.6846 | 1.1   | 0.7914 | -2      | 0.066  | -1.05 | 0.9068 |
| 99835_at   | 1417487_at   | Fosl1                  | fos-like antigen 1                                                           | -2.36 | 0.15 | 1.9     | 0.0487 | 1.24  | 0.2182 | 1.09    | 0.3785 | 1.62  | 0.4196 |
| 99836_at   | 1427372_at   | Cyp27b1                | cytochrome P450, family 27, subfamily b, polypeptide                         | -2.84 | 0.05 | -1.64   | 0.1077 | 1.1   | 0.7656 | 1.2     | 0.5267 | -1.05 | 0.9259 |
| 99837_at   | 1450568_at   | Galr1                  | galanin receptor 1                                                           | -1.44 | 0.5  | 1.07    | 0.6178 | 1.07  | 0.707  | -1.02   | 0.9118 | 1.73  | 0.142  |
| 99839_at   | 1420735_at   | Gabbr2                 | gamma-aminobutyric acid (GABA-C) receptor 2                                  | 1.23  | 0.41 | 1.33    | 0.0761 | 1.12  | 0.3501 | 1.01    | 0.9538 | 1.21  | 0.7164 |
| 99840_at   | 1416266_at   | Pdyn                   | prodynorphin                                                                 | -1.09 | 0.73 | 1.15    | 0.1076 | 1.34  | 0.022  | 1.09    | 0.3202 | -1.03 | 0.9315 |
| 99841_at   | 1422003_at   | Blr1                   | Burkitt lymphoma receptor 1                                                  | 1.71  | 0.02 | -1.09   | 0.8341 | 1.16  | 0.7397 | -1.37   | 0.4094 | 1.73  | 0.1675 |
| 99842_at   | 1421698_a_at | Col19a1                | procollagen, type XIX, alpha 1                                               | 1.39  | 0.51 | -1.06   | 0.7219 | 1.1   | 0.4513 | 1.06    | 0.7036 | 1.96  | 0.0866 |
| 99843_at   | 1449917_at   | Pitx3                  | paired-like homeodomain transcription factor 3                               | -2.38 | 0.15 | -1.1    | 0.2823 | 1.02  | 0.8573 | -1.01   | 0.8905 | -1.03 | 0.8791 |
| 99844_at   | 1427529_at   | Fzd9                   | frizzled homolog 9 (Drosophila)                                              | 1.22  | 0.72 | 1.66    | 0.0227 | 1.48  | 0.0895 | 1.39    | 0.2295 | -1.2  | 0.6818 |
| 99845_at   | 1418933_at   | Slc1a6                 | solute carrier family 1 (high affinity aspartate                             | -1.07 | 0.88 | -1.02   | 0.9346 | -1.69 | 0.0358 | -1.35   | 0.2674 | 1.75  | 0.0861 |
| 99846_at   | 1418220_at   | Foxf2                  | forkhead box F2                                                              | -1.22 | 0.48 | 1.17    | 0.3117 | 1.33  | 0.103  | 1.34    | 0.0392 | -1.24 | 0.5053 |
| 99847_at   | 1418946_at   | St3gal1                | ST3 beta-galactoside alpha-2,3-sialyltransferase                             | -1.18 | 0.12 | -1.32   | 0      | -1.39 | 0      | -1.88   | 0      | -1.03 | 0.8406 |
| 99848_at   | 1425376_at   | Alox15b                | arachidonate 15-lipoxygenase, second type                                    | -1.68 | 0.36 | -1.5    | 0.021  | -1.23 | 0.0453 | -1.32   | 0.0145 | -1.05 | 0.8909 |
| 99851_at   | 1436308_at   | Zfp292                 | zinc finger protein 292                                                      | -1.11 | 0.31 | -1.19   | 0.0213 | -1.18 | 0.0699 | -1.25   | 0.007  | 1.27  | 0.0322 |
| 99854_at   | 1421669_at   | Sult3a1                | sulfotransferase family 3A, member 1                                         | -2.82 | 0.38 | -165.01 | 0      | -4.28 | 0.0001 | -205.69 | 0      | 2.32  | 0.0193 |
| 99855_at   | 1421340_at   | Map3k5                 | mitogen activated protein kinase kinase kinase                               | -1.18 | 0.52 | 1.15    | 0.1859 | 1.32  | 0.06   | 1.19    | 0.1527 | 1.68  | 0.0924 |
| 99856_r_at | 1422592_at   | Catnd2                 | catenin delta 2                                                              | -1.74 | 0.03 | -1.21   | 0.2288 | -1.26 | 0.1312 | -1.27   | 0.1016 | 1.22  | 0.2662 |
| 99861_at   | 1422127_at   | Dhh                    | desert hedgehog                                                              | -1.72 | 0.14 | -1.12   | 0.4569 | -1.06 | 0.7006 | -1.65   | 0.0037 | 1.03  | 0.9382 |
| 99862_at   | 1455093_a_at | Ahsg                   | alpha-2-HS-glycoprotein                                                      | -1.04 | 0.81 | 1.04    | 0.2382 | 1.02  | 0.237  | 1.01    | 0.6327 | 1.38  | 0.0083 |
| 99863_at   | 1433467_at   | Slc7a6                 | solute carrier family 7 (cationic amino acid transporter)                    | -1.37 | 0.42 | 1.07    | 0.4455 | 1.08  | 0.3003 | 1.16    | 0.3    | 1.32  | 0.4863 |
| 99864_at   | 1434772_at   | Adora2b                | adenosine A2b receptor                                                       | -1.2  | 0.59 | -1.06   | 0.8195 | -1.07 | 0.8074 | -1.55   | 0.129  | -1.32 | 0.6191 |
| 99865_at   | 1419616_at   | Bmpr2                  | bone morphogenetic protein receptor, type II (activin)                       | 1.62  | 0.39 | -1.24   | 0.3675 | -1.02 | 0.9429 | -1.18   | 0.4986 | 1.65  | 0.0459 |
| 99866_at   | 1445689_at   | Rbms1                  | RIKEN cDNA 6030432P03 gene                                                   | -2.54 | 0.03 | 1.22    | 0.3957 | -1.52 | 0.0218 | -1.24   | 0.3126 | 1.67  | 0.1879 |
| 99867_at   | 1419800_at   | ---                    | ---                                                                          | -1.06 | 0.88 | 1.59    | 0.0596 | -1.02 | 0.851  | -1.03   | 0.7614 | -1.09 | 0.8147 |
| 99868_at   | 1419875_at   | ---                    | Transcribed locus                                                            | -1.22 | 0.77 | 1.15    | 0.6002 | 1.37  | 0.226  | 1.11    | 0.7561 | 3.35  | 0.0412 |
| 99869_at   | 1421293_at   | Hdgfl1                 | hepatoma derived growth factor-like 1                                        | -1.43 | 0.2  | -1.15   | 0.681  | -1.15 | 0.5801 | -1.7    | 0.0728 | 1.58  | 0.1863 |
| 99872_s_at | 1422302_s_at | Ftl1 /// Ftl2 /// Ftl3 | ferritin light chain 1 /// ferritin light chain 2 /// ferritin light chain 3 | -1.14 | 0.56 | -1.06   | 0.1367 | -1.11 | 0.3581 | -1.07   | 0.1603 | 1.14  | 0.0829 |

|            |              |              |                                                |       |      |       |        |       |        |       |        |       |        |
|------------|--------------|--------------|------------------------------------------------|-------|------|-------|--------|-------|--------|-------|--------|-------|--------|
| 99873_at   | 1452018_at   | Nkx2-6       | NK2 transcription factor related, locus 6 (Drc | 1.17  | 0.61 | 1.26  | 0.0686 | 1.11  | 0.3256 | 1.29  | 0.0218 | 1.41  | 0.0655 |
| 99874_at   | 1439548_at   | Rap2b        | RAP2B, member of RAS oncogene family           | -2.02 | 0.33 | -1.15 | 0.5738 | -1.1  | 0.628  | -1.09 | 0.768  | 2.03  | 0.2183 |
| 99875_at   | 1422110_at   | Hr           | hairless                                       | -2.06 | 0.05 | 1.16  | 0.1848 | 1.12  | 0.3052 | 1.1   | 0.2922 | -1.35 | 0.2696 |
| 99876_at   | 1420818_at   | Sla          | src-like adaptor                               | -1.68 | 0.13 | -1.5  | 0.172  | -1.48 | 0.1947 | -1.08 | 0.8449 | -1.12 | 0.6843 |
| 99880_at   | 1422109_at   | Rfx1         | regulatory factor X, 1 (influences HLA class   | 1.03  | 0.79 | 1.31  | 0.1014 | 1.23  | 0.2945 | 1.45  | 0.2139 | -1.23 | 0.4044 |
| 99881_at   | 1420360_at   | Dkk1         | dickkopf homolog 1 (Xenopus laevis)            | -2.98 | 0.41 | 1.28  | 0.5327 | -1.53 | 0.2172 | -1.34 | 0.3902 | -2.33 | 0.0585 |
| 99883_g_at | 1450166_at   | Ids          | iduronate 2-sulfatase                          | -2.31 | 0.01 | -1.06 | 0.4792 | -1.09 | 0.4389 | -1.13 | 0.1693 | 1.29  | 0.2459 |
| 99884_at   | 1427813_at   | Ids          | iduronate 2-sulfatase                          | -1.32 | 0.28 | 1.1   | 0.6709 | 1.44  | 0.3461 | 1.24  | 0.308  | 1.14  | 0.71   |
| 99885_at   | 1451958_at   | Igh-6        | Immunoglobulin heavy chain 6 (heavy chain      | 2.38  | 0.05 | -1.07 | 0.8525 | -1.11 | 0.7927 | -1.26 | 0.5353 | 2.74  | 0.2731 |
| 99886_at   | 1451813_at   | Oprk1        | opioid receptor, kappa 1                       | -1.56 | 0.32 | -1.44 | 0.1205 | 1.16  | 0.4609 | 1.18  | 0.5039 | 2.82  | 0.0467 |
| 99887_at   | 1421796_a_at | EfnA5        | ephrin A5                                      | -1.42 | 0.67 | -1.52 | 0.1348 | -1.05 | 0.8632 | -1.27 | 0.4138 | 1.02  | 0.9824 |
| 99888_at   | 1421614_at   | Zan          | zonadhesin                                     | -1.93 | 0.01 | 1.06  | 0.5695 | 1.17  | 0.096  | -1.08 | 0.4662 | 1.38  | 0.1647 |
| 99891_at   | 1420749_a_at | Pou6f1       | POU domain, class 6, transcription factor 1    | 1.83  | 0.1  | -1.02 | 0.9264 | 1.29  | 0.3046 | -1.82 | 0.021  | -1.08 | 0.8781 |
| 99892_at   | 1419425_at   | Cnr1         | cannabinoid receptor 1 (brain)                 | -1.63 | 0.08 | -1.42 | 0.0327 | -1.29 | 0.1094 | -1.44 | 0.0406 | -1.17 | 0.1705 |
| 99893_at   | 1418498_at   | Fgf13        | fibroblast growth factor 13                    | -1.48 | 0.54 | 1.03  | 0.8425 | 1.11  | 0.5429 | 1.07  | 0.6422 | 1.43  | 0.0721 |
| 99895_at   | 1422291_at   | Ccr8         | chemokine (C-C motif) receptor 8               | -1.11 | 0.64 | -1.07 | 0.6552 | -1.01 | 0.956  | -1.11 | 0.4925 | 1.07  | 0.643  |
| 99896_at   | 1460723_at   | Mc5r         | melanocortin 5 receptor                        | -1.87 | 0.06 | 1.1   | 0.4924 | -1.02 | 0.8877 | -1.04 | 0.7559 | 1.43  | 0.0188 |
| 99897_at   | 1421189_at   | Gabrb3       | gamma-aminobutyric acid (GABA-A) recepto       | -1.29 | 0.57 | -1.47 | 0.2846 | 1.11  | 0.789  | 1.03  | 0.9272 | 1     | 1      |
| 99898_at   | 1417944_at   | Gng4         | guanine nucleotide binding protein (G protei   | -1.88 | 0.19 | -1.08 | 0.5597 | 1.06  | 0.7725 | -1.14 | 0.1928 | 1.1   | 0.7941 |
| 99899_at   | 1450357_a_at | Ccr6         | chemokine (C-C motif) receptor 6               | -1.1  | 0.49 | 1.25  | 0.2226 | 2.68  | 0.0669 | 2.01  | 0.1718 | 1.07  | 0.773  |
| 99900_at   | 1449185_at   | Crx          | cone-rod homeobox containing gene              | -2.12 | 0.02 | -1.02 | 0.825  | -1.1  | 0.339  | -1.1  | 0.5603 | 1.28  | 0.3043 |
| 99901_at   | 1421431_at   | Ptfrf        | polymerase I and transcript release factor     | -1.43 | 0.21 | -1.05 | 0.5595 | -1.01 | 0.8718 | -1.02 | 0.8805 | 1.37  | 0.0688 |
| 99902_at   | 1450193_at   | Hcn1         | hyperpolarization-activated, cyclic nucleotide | -1.2  | 0.56 | 1.04  | 0.6787 | 1.1   | 0.4188 | 1.03  | 0.7655 | 1.12  | 0.724  |
| 99903_at   | 1426005_at   | Dmp1         | dentin matrix protein 1                        | -3.4  | 0.12 | 1.21  | 0.5697 | 1.01  | 0.9648 | 1.05  | 0.8673 | 1.35  | 0.4029 |
| 99904_at   | 1421511_at   | Itgb3        | integrin beta 3                                | -3.24 | 0.01 | 1.2   | 0.461  | -1.02 | 0.9487 | -1.21 | 0.4311 | 1.33  | 0.2594 |
| 99905_at   | 1450547_x_at | Dub2         | deubiquitinating enzyme 2                      | -1.84 | 0.2  | 1.08  | 0.7049 | -1.13 | 0.4272 | -1.25 | 0.0564 | 1.57  | 0.338  |
| 99906_at   | 1420602_a_at | Esx1         | extraembryonic, spermatogenesis, homeobc       | -1.55 | 0.45 | -2.91 | 0.001  | -2.34 | 0.0099 | -2.19 | 0.0123 | 1.22  | 0.3053 |
| 99907_at   | 1426033_at   | Rgs9         | regulator of G-protein signaling 9             | -2.15 | 0.22 | -1.21 | 0.5119 | -1.28 | 0.271  | -1.54 | 0.1201 | 1.71  | 0.3207 |
| 99908_at   | 1451598_at   | Pax4         | paired box gene 4                              | -1.93 | 0.04 | 1.1   | 0.6668 | 1.14  | 0.6279 | 1.29  | 0.3445 | 1.7   | 0.0407 |
| 99909_at   | 1449431_at   | Trpc6        | transient receptor potential cation channel, s | -4.56 | 0.35 | 1.91  | 0.2245 | 1.61  | 0.2701 | 1.36  | 0.5337 | 2.73  | 0.2007 |
| 99910_at   | 1417994_a_at | Accn1        | amiloride-sensitive cation channel 1, neuron   | 1.32  | 0.51 | 1.34  | 0.3649 | -1.15 | 0.2455 | -1.15 | 0.3256 | 1.61  | 0.1026 |
| 99911_at   | 1448790_at   | Sema6b       | sema domain, transmembrane domain (TM)         | -2.45 | 0.26 | 1.46  | 0.0713 | 1.35  | 0.0971 | 1.34  | 0.0299 | -1.01 | 0.9731 |
| 99912_at   | 1422116_at   | Fmr2         | fragile X mental retardation 2 homolog         | 1.56  | 0.45 | 1.06  | 0.8467 | -1.12 | 0.6872 | -1.1  | 0.8148 | -1.06 | 0.9061 |
| 99913_at   | 1420569_at   | Chad         | chondroadherin                                 | 1.04  | 0.84 | -1.15 | 0.2892 | -1.27 | 0.0972 | -1.17 | 0.2241 | 1.25  | 0.2559 |
| 99914_at   | 1422221_at   | Hand2        | heart and neural crest derivatives expressec   | 1.38  | 0.37 | -1.14 | 0.6937 | 1.25  | 0.4541 | -1.09 | 0.787  | 1.44  | 0.1326 |
| 99915_at   | 1421134_at   | Areg         | amphiregulin                                   | -1.51 | 0.26 | -1.28 | 0.373  | -1.03 | 0.905  | -1.08 | 0.7509 | 1.55  | 0.3967 |
| 99916_at   | 1422079_at   | Prkch        | protein kinase C, eta                          | 1.09  | 0.88 | 2.23  | 0.0128 | 1.71  | 0.1735 | 2.79  | 0.0347 | -1.13 | 0.7899 |
| 99917_at   | 1416544_at   | Ezh2         | enhancer of zeste homolog 2 (Drosophila)       | 1.42  | 0.15 | 1.42  | 0.0138 | 1.22  | 0.0365 | 1.34  | 0.0018 | 1.41  | 0.0605 |
| 99920_at   | 1418380_at   | Terf1        | telomeric repeat binding factor 1              | 1.83  | 0.31 | 1.26  | 0.2125 | 1.37  | 0.021  | 1.31  | 0.0386 | 1.01  | 0.9868 |
| 99922_at   | 1417397_at   | Slc9a1       | solute carrier family 9 (sodium/hydrogen exc   | -1.61 | 0.14 | 1.06  | 0.527  | -1.04 | 0.5333 | -1.03 | 0.5705 | 1.01  | 0.9479 |
| 99923_at   | 1427160_at   | 2500001H09Ri | RIKEN cDNA 2500001H09 gene                     | 1.29  | 0.22 | 1.15  | 0.2532 | 1.21  | 0.3026 | 1.04  | 0.7642 | 1.02  | 0.8723 |
| 99924_at   | 1417144_at   | Tubg1        | tubulin, gamma 1                               | -1.69 | 0.02 | -1.01 | 0.8993 | -1.09 | 0.4462 | 1.11  | 0.3566 | -2.33 | 0.0764 |
| 99926_at   | 1455490_at   | Pigr         | polymeric immunoglobulin receptor              | 1.07  | 0.69 | -1.04 | 0.5582 | 1.02  | 0.6478 | -1.09 | 0.1252 | 1.3   | 0.0807 |
| 99927_at   | 1418724_at   | Cfi          | complement component factor i                  | -1.18 | 0.12 | -1.05 | 0.3072 | -1.08 | 0.2941 | -1.14 | 0.0471 | -1.19 | 0.0434 |
| 99929_at   | 1460170_at   | Ext2         | exostoses (multiple) 2                         | -1.44 | 0.09 | -1.1  | 0.2807 | -1.2  | 0.0321 | -1.07 | 0.3993 | -1.07 | 0.6164 |
| 99931_at   | 1427010_s_at | Lama5        | laminin, alpha 5                               | 1.48  | 0.31 | 1.71  | 0.041  | 1.5   | 0.0693 | 2.13  | 0.0022 | 1.59  | 0.1904 |
| 99932_at   | 1416224_at   | Zbtb17       | zinc finger and BTB domain containing 17       | 1.42  | 0.26 | 1.07  | 0.4777 | 1.19  | 0.0589 | 1.02  | 0.8276 | -1.16 | 0.4621 |
| 99933_at   | 1417703_at   | Pvrl2        | poliovirus receptor-related 2                  | -1.51 | 0.24 | -1.2  | 0.0583 | -1.12 | 0.2625 | 1.06  | 0.5237 | 1.06  | 0.8165 |
| 99934_at   | 1424456_at   | Pvrl2        | poliovirus receptor-related 2                  | -1.21 | 0.14 | -1.08 | 0.1148 | -1.1  | 0.2021 | -1.03 | 0.6303 | -1.2  | 0.4284 |
| 99935_at   | 1417749_a_at | Tjp1         | tight junction protein 1                       | -1.2  | 0.41 | -1.23 | 0.0487 | -1.04 | 0.7844 | -1.2  | 0.0756 | 1.02  | 0.8416 |
| 99936_at   | 1416238_at   | Tie1         | tyrosine kinase receptor 1                     | 2.4   | 0.05 | -1.07 | 0.6273 | -1.03 | 0.8212 | -1.26 | 0.1125 | -1.01 | 0.9728 |
| 99937_at   | 1424234_s_at | Meox2        | mesenchyme homeobox 2                          | -1.42 | 0.3  | 1.05  | 0.7859 | 1.05  | 0.7678 | -1    | 0.9654 | 1.14  | 0.5265 |
| 99938_at   | 1416587_a_at | Xrcc1        | X-ray repair complementing defective repair    | 2.04  | 0.08 | 1.09  | 0.5076 | 1.12  | 0.1965 | 1.16  | 0.1416 | 1.3   | 0.4049 |



|            |              |                 |                                               |       |      |       |        |       |        |       |        |        |        |
|------------|--------------|-----------------|-----------------------------------------------|-------|------|-------|--------|-------|--------|-------|--------|--------|--------|
| 99939_at   | 1417257_at   | Cel             | carboxyl ester lipase                         | 1.37  | 0.32 | 1.01  | 0.8586 | -1.01 | 0.9382 | -1.02 | 0.7445 | -1.29  | 0.3208 |
| 99940_at   | 1416324_s_at | 2410004N11Rik   | RIKEN cDNA 2410004N11 gene                    | 2.75  | 0.03 | 1.06  | 0.41   | 1.08  | 0.3251 | 1.08  | 0.2873 | 1.02   | 0.908  |
| 99941_at   | 1451600_s_at | LOC13909 /// E: | esterase 31-like /// esterase 31              | -6.7  | 0    | -4.54 | 0      | -1.23 | 0.0666 | -4.79 | 0      | -11.48 | 0      |
| 99942_s_at | 1417917_at   | Cnn1            | calponin 1                                    | -4.29 | 0.17 | -1.62 | 0.3295 | -1.13 | 0.7764 | -1.12 | 0.7947 | 1.42   | 0.4501 |
| 99944_at   | 1450930_at   | Hpc             | hippocalcin                                   | -1.41 | 0.49 | 1.34  | 0.0434 | 1.09  | 0.6499 | 1.17  | 0.3371 | 2.01   | 0.096  |
| 99945_at   | 1450570_a_at | Cd19            | CD19 antigen                                  | 1.18  | 0.45 | 1.15  | 0.0388 | -1.03 | 0.6063 | 1.03  | 0.6784 | 1.53   | 0.0018 |
| 99947_at   | 1455676_x_at | Tial1           | Tial1 cytotoxic granule-associated RNA binc   | 1.73  | 0.11 | 1.12  | 0.0025 | 1.32  | 0.0007 | 1.22  | 0.0012 | 1.15   | 0.3897 |
| 99948_at   | 1451347_at   | AI225782        | expressed sequence AI225782                   | 1.74  | 0.14 | 1.13  | 0.5328 | 1.09  | 0.7455 | 1.53  | 0.0224 | 1.34   | 0.2338 |
| 99949_at   | 1424428_at   | AI225782        | expressed sequence AI225782                   | 2.29  | 0.1  | -1.14 | 0.3427 | -1.31 | 0.0941 | -1.23 | 0.1    | -1.52  | 0.0986 |
| 99950_at   | 1426469_a_at | Tbp             | TATA box binding protein                      | 1.64  | 0.03 | 1.71  | 0.0628 | 2.33  | 0.0015 | 1.73  | 0.0292 | 1.93   | 0.1413 |
| 99951_at   | 1425793_a_at | Rorc            | RAR-related orphan receptor gamma             | 1.61  | 0.29 | 1.15  | 0.4533 | -1.23 | 0.1971 | 1.07  | 0.6421 | 1.4    | 0.0593 |
| 99952_at   | 1451537_at   | Chi3l1          | chitinase 3-like 1                            | 8.26  | 0.07 | 22.92 | 0.1169 | 1.48  | 0.1575 | 21.74 | 0.0337 | -3.63  | 0.0018 |
| 99953_at   | 1450688_at   | Rgl2            | ral guanine nucleotide dissociation stimulat  | -1.01 | 0.97 | 1.28  | 0.0125 | 1.15  | 0.1937 | 1.36  | 0.0035 | 1.07   | 0.6641 |
| 99954_at   | 1451293_at   | Rnu3ip2         | RNA, U3 small nucleolar interacting protein : | -1.28 | 0.11 | -1.17 | 0.0211 | -1.06 | 0.5722 | -1.17 | 0.0168 | 1.08   | 0.511  |
| 99955_at   | 1416891_at   | Numb            | numb gene homolog (Drosophila)                | 1.47  | 0.07 | 1.06  | 0.3617 | 1.15  | 0.1875 | 1.11  | 0.076  | -1.32  | 0.0244 |
| 99956_at   | 1452514_a_at | Kit             | kit oncogene                                  | -1.36 | 0.13 | -1.04 | 0.7448 | 1.02  | 0.9196 | -1.16 | 0.3518 | 1.06   | 0.8027 |
| 99957_at   | 1416298_at   | Mmp9            | matrix metalloproteinase 9                    | 1.13  | 0.61 | 1.27  | 0.0598 | 1.11  | 0.2297 | 1.39  | 0.0629 | -1.1   | 0.7195 |
| 99958_at   | 1449989_at   | Mcpt2           | mast cell protease 2                          | -1.99 | 0.32 | -1.81 | 0.0065 | -1.52 | 0.1436 | -1.66 | 0.0128 | 1.4    | 0.5614 |
| 99959_at   | 1450387_s_at | Ak3l1           | adenylate kinase 3 alpha-like 1               | 2.16  | 0.16 | 1.51  | 0.0005 | 1.3   | 0.0249 | 1.6   | 0.0002 | 1.49   | 0.0909 |
| 99960_at   | 1426233_at   | Map2k4          | mitogen activated protein kinase kinase 4     | -1.59 | 0.05 | 1.02  | 0.8092 | 1.05  | 0.5375 | 1.03  | 0.6285 | -1.03  | 0.9402 |
| 99961_s_at | 1418841_s_at | Cdc2l1          | cell division cycle 2-like 1                  | 1.85  | 0.13 | -1.02 | 0.8251 | 1.04  | 0.6384 | 1.17  | 0.0432 | -3.06  | 0.0013 |
| 99962_at   | 1450053_at   | Kif2a           | RIKEN cDNA D930043N17 gene                    | 1.08  | 0.88 | 1.35  | 0.0052 | 1.12  | 0.4009 | 1.43  | 0.0003 | -1.15  | 0.302  |
| 99963_at   | 1450090_at   | Zfp101          | zinc finger protein 101                       | 2.97  | 0.21 | -1.49 | 0.0977 | -2.6  | 0.0043 | -1.49 | 0.1095 | 1.35   | 0.3967 |
| 99964_at   | 1418176_at   | Vdr             | vitamin D receptor                            | -1.55 | 0.22 | 1.15  | 0.2973 | 1.73  | 0.3284 | 1.02  | 0.9027 | 1.77   | 0.3546 |
| 99970_at   | 1419054_a_at | Ptpn21          | protein tyrosine phosphatase, non-receptor 1  | -1.17 | 0.64 | 1.31  | 0.0383 | 1.38  | 0.021  | 1.36  | 0.0222 | 1.75   | 0.0177 |
| 99972_at   | 1419524_at   | Tph1            | tryptophan hydroxylase 1                      | 1.28  | 0.41 | -1.04 | 0.7553 | -1.05 | 0.6678 | -1.11 | 0.4259 | 1.72   | 0.1638 |
| 99973_s_at | 1450185_a_at | Kcnj15          | potassium inwardly-rectifying channel, subfa  | -1.11 | 0.76 | -1    | 0.9965 | -1.13 | 0.7253 | -1.64 | 0.0754 | 1.98   | 0.3614 |
| 99975_at   | 1426483_at   | Prkri           | protein-kinase, interferon-inducible double s | 1     | 0.99 | 1.11  | 0.2339 | -1.06 | 0.5267 | 1.21  | 0.0363 | 1.43   | 0.0295 |
| 99977_at   | 1450682_at   | ---             | ---                                           | -1.81 | 0.09 | -1.11 | 0.4239 | 1.26  | 0.1207 | 1.04  | 0.702  | 1.16   | 0.6717 |
| 99978_s_at | 1416703_at   | Mapk14          | mitogen activated protein kinase 14           | -1.06 | 0.82 | -1.21 | 0.0054 | -1.02 | 0.8303 | -1.19 | 0.0169 | -1.24  | 0.0269 |
| 99979_at   | 1416612_at   | Cyp1b1          | cytochrome P450, family 1, subfamily b, poly  | 1.73  | 0.36 | -1.08 | 0.7889 | -1.02 | 0.9435 | 1.17  | 0.649  | 1.25   | 0.4352 |
| 99980_at   | 1427454_at   | Hoxc6           | homeo box C6                                  | -1.33 | 0.36 | -1.08 | 0.7146 | -1.18 | 0.336  | -1.27 | 0.1648 | 1.25   | 0.597  |
| 99981_at   | 1450115_at   | Gnaq            | guanine nucleotide binding protein, alpha q   | -2.79 | 0.01 | -1.1  | 0.5892 | 1.15  | 0.4013 | -1.17 | 0.4256 | 1.14   | 0.3805 |
| 99982_at   | 1421266_s_at | Nfkbib          | nuclear factor of kappa light chain gene enh: | 1.31  | 0.22 | 1.09  | 0.3266 | -1.02 | 0.7821 | 1.19  | 0.07   | -1.16  | 0.7415 |
| 99984_at   | 1417662_at   | Elk3            | ELK3, member of ETS oncogene family           | -2.34 | 0.36 | -1.11 | 0.5257 | 1.13  | 0.4064 | -1.17 | 0.3446 | 3.1    | 0.0019 |
| 99985_at   | 1421529_a_at | Txnrd1          | thioredoxin reductase 1                       | 1.31  | 0.45 | 1.21  | 0.0054 | 1.1   | 0.1618 | 1.18  | 0.0403 | -1.03  | 0.788  |
| 99986_at   | 1419372_at   | Gosr2           | golgi SNAP receptor complex member 2          | -1.04 | 0.76 | 1.02  | 0.8526 | 1.04  | 0.7721 | -1.08 | 0.3915 | -1.04  | 0.841  |
| 99987_at   | 1456486_at   | Zfp574          | zinc finger protein 574                       | -1.25 | 0.4  | 1.74  | 0.0762 | 1.92  | 0.0581 | 1.66  | 0.1632 | -1.2   | 0.5145 |
| 99988_at   | 1423736_a_at | Dym             | dymeclin                                      | 1.42  | 0.22 | -1.17 | 0.0209 | -1.11 | 0.2549 | -1.02 | 0.7821 | -1.2   | 0.0505 |
| 99990_at   | 1426487_a_at | Rbbp6           | retinoblastoma binding protein 6              | -1.34 | 0.03 | 1.02  | 0.7598 | 1.27  | 0.0467 | -1    | 0.9844 | 1.17   | 0.173  |
| 99991_at   | 1420904_at   | Il17r           | interleukin 17 receptor                       | 1.24  | 0.65 | 1.14  | 0.2136 | 1.09  | 0.4842 | 1.3   | 0.0288 | 2.15   | 0.0027 |
| 99992_at   | 1420905_at   | Il17r           | Interleukin 17 receptor                       | 1.22  | 0.34 | 1.05  | 0.5485 | 1.03  | 0.7725 | 1.11  | 0.2426 | 1.65   | 0.0043 |
| 99993_at   | 1421424_a_at | Anpep           | alanyl (membrane) aminopeptidase              | -1.13 | 0.5  | 1.07  | 0.6568 | 1.01  | 0.9463 | -1    | 0.9871 | 1.07   | 0.7213 |
| 99994_at   | 1417956_at   | Cidea           | cell death-inducing DNA fragmentation facto   | -1.98 | 0.22 | -1.1  | 0.7564 | -1.68 | 0.1998 | -1.43 | 0.3399 | 1.36   | 0.2861 |
| 99995_at   | 1423203_a_at | Cetn1           | centrin 1                                     | 2.39  | 0.04 | -1.15 | 0.5886 | -1.91 | 0.038  | -1.51 | 0.1448 | -1.48  | 0.131  |
| 99996_at   | 1449586_at   | Pkp1            | plakophilin 1                                 | -1.62 | 0.23 | -1.27 | 0.4122 | -1.15 | 0.583  | -1.39 | 0.2516 | -1.01  | 0.9621 |
| 99999_at   | 1417791_a_at | Zfml            | zinc finger, matrin-like                      | -1.19 | 0.4  | 1.08  | 0.347  | 1.15  | 0.2208 | 1.22  | 0.0258 | 1.08   | 0.6771 |
