# Supplementary material for: Delayed and Accelerated Aging Share Common Longevity Assurance Mechanisms
Source: PLoS Genet. 2008 Aug 15;4(8):e1000161. doi: 10.1371/journal.pgen.1000161 (PMC2493043; doi:10.1371/journal.pgen.1000161)
Supplement: Table S4 — Expression changes in the kidney, liver, lung and spleen of 130-week old as compared to 13-week old naturally aged mice. Expression profiles from these tables as well as all previously unpublished microarray data are available in public repository Array Express (www.ebi.ac.uk/arrayexpress/) and comply with the MIAME regulations. (3.7 MB PDF) [file pgen.1000161.s008.pdf]

**Supplementary table S4. Expression changes in the kidney, liver, lung and spleen of 130-week old as compared to 13-week old naturally aging wt mice**

| code         | Gene Symbol             | Gene Title                                                                               | Kidney | p1    | Liver | p2    | Lung  | p3    | Spleen | p4    | av. FC |
|--------------|-------------------------|------------------------------------------------------------------------------------------|--------|-------|-------|-------|-------|-------|--------|-------|--------|
| 1433190_at   | 4933433N18Rik           | RIKEN cDNA 4933433N18 gene                                                               | -2.49  | 0.333 | -4.93 | 0.104 | -3.63 | 0.25  | -1.59  | 0.443 | -3.16  |
| 1447050_at   | ---                     | ---                                                                                      | -3.47  | 0.057 | -3.95 | 0.051 | -2.33 | 0.244 | -1.32  | 0.503 | -2.77  |
| 1459319_at   | Pola1                   | Polymerase (DNA directed), alpha 1                                                       | -4.66  | 0.176 | -3.66 | 0.003 | -2.05 | 0.241 | -1.43  | 0.584 | -2.95  |
| 1443451_at   | ---                     | ---                                                                                      | -5.77  | 0.099 | -2.72 | 0.183 | -1.85 | 0.247 | -3.14  | 0.002 | -3.37  |
| 1460418_x_at | H2-T18                  | histocompatibility 2, T region locus 18                                                  | -2.51  | 0.488 | -3.16 | 0.095 | -2.68 | 0.216 | -1.57  | 0.524 | -2.48  |
| 1427977_x_at | Oog1                    | oogenesin 1                                                                              | -2.26  | 0.393 | -2.97 | 0.146 | -3.15 | 0.123 | -1.2   | 0.672 | -2.39  |
| 1458907_at   | Slco6b1                 | Solute carrier organic anion transporter family, member 6b1                              | -2.78  | 0.284 | -2.54 | 0.02  | -2.8  | 0.014 | -1.56  | 0.34  | -2.42  |
| 1420357_s_at | Xlr3a /// Xlr3b /// Mx1 | X-linked lymphocyte-regulated 3A /// X-linked lymphocyte-regulated 3B /// hypothetical 3 | -4.4   | 0.036 | -1.81 | 0.272 | -2.99 | 0.057 | -3.56  | 0.076 | -3.19  |
| 1459139_at   | ---                     | ---                                                                                      | -2.88  | 0.032 | -1.78 | 0.079 | -3.62 | 0.001 | -1.19  | 0.663 | -2.37  |
| 1419539_at   | Irx4                    | Iroquois related homeobox 4 (Drosophila)                                                 | -3.88  | 0.318 | -3.3  | 0.163 | -1.57 | 0.364 | -2.3   | 0.05  | -2.76  |
| 1443076_at   | D030041N04Rik           | RIKEN cDNA D030041N04 gene                                                               | -2.24  | 0.153 | -3.33 | 0.033 | -2.07 | 0.315 | -1.6   | 0.32  | -2.31  |
| 1416640_at   | Kcne1l                  | potassium voltage-gated channel, Isk-related family, member 1-like                       | -4.63  | 0.096 | -1.78 | 0.196 | -2.17 | 0.206 | -1.15  | 0.848 | -2.43  |
| 1441853_at   | Dpp10                   | Dipeptidylpeptidase 10                                                                   | -1.83  | 0.213 | -2.9  | 0.058 | -2.87 | 0.352 | -1.37  | 0.539 | -2.24  |
| 1443070_at   | Auts2                   | Autism susceptibility candidate 2                                                        | -1.31  | 0.593 | -3.74 | 0.054 | -4.67 | 0.057 | -1.36  | 0.711 | -2.77  |
| 1427800_at   | Krtap16-2               | keratin associated protein 16-2                                                          | -2.61  | 0.101 | -2.03 | 0.077 | -2.65 | 0.169 | -1.59  | 0.301 | -2.22  |
| 1436736_x_at | D0H4S114                | DNA segment, human D4S114                                                                | -1.36  | 0.451 | -3.85 | 0.013 | -3.89 | 0.019 | -1.19  | 0.304 | -2.57  |
| 1443714_at   | C530044N13Rik           | RIKEN cDNA C530044N13 gene                                                               | -2.31  | 0.154 | -3.2  | 0.048 | -1.94 | 0.089 | -1.78  | 0.381 | -2.31  |
| 1437954_at   | ---                     | ---                                                                                      | -2.36  | 0.224 | -2.79 | 0.331 | -2.04 | 0.02  | -1.05  | 0.936 | -2.06  |
| 1432440_at   | 1700111E14Rik           | RIKEN cDNA 1700111E14 gene                                                               | -2.06  | 0.302 | -3.02 | 0.076 | -2.16 | 0.34  | -1.17  | 0.208 | -2.1   |
| 1430938_at   | Zfp64                   | zinc finger protein 64                                                                   | -3.88  | 0.004 | -1.43 | 0.556 | -2.98 | 0.331 | -1.85  | 0.241 | -2.53  |
| 1448964_at   | S100g                   | S100 calcium binding protein G                                                           | -2.46  | 0.048 | -2.14 | 0.029 | -2.32 | 0.093 | -1.63  | 0.511 | -2.14  |
| 1440001_at   | Rian                    | RNA imprinted and accumulated in nucleus                                                 | -2.29  | 0.146 | -3.38 | 0.111 | -1.73 | 0.106 | -1.06  | 0.689 | -2.11  |
| 1444919_at   | ---                     | ---                                                                                      | -2.11  | 0.142 | -3.43 | 0.053 | -1.82 | 0.422 | -1.16  | 0.828 | -2.13  |
| 1456139_at   | Air                     | antisense Igf2r RNA                                                                      | -1.68  | 0.057 | -2.84 | 0.208 | -2.68 | 0.01  | -1.17  | 0.708 | -2.09  |
| 1453507_at   | Mbd5                    | methyl-CpG binding domain protein 5                                                      | -1.69  | 0.243 | -1.92 | 0.43  | -4.65 | 0     | -1.44  | 0.401 | -2.42  |
| 1432627_at   | 5730507A11Rik           | RIKEN cDNA 5730507A11 gene                                                               | -2.65  | 0.182 | -2.57 | 0.029 | -1.75 | 0.212 | -1.71  | 0.407 | -2.17  |
| 1427686_at   | V2r13 /// LOC63261      | vomerolateral 2, receptor, 13 /// similar to vomeronasal 2, receptor, 8                  | -2.05  | 0.434 | -2.21 | 0.272 | -2.49 | 0.299 | -1.27  | 0.809 | -2     |
| 1445745_at   | Rbm17 /// LOC5451       | RNA binding motif protein 17 /// similar to RNA binding motif protein 17                 | -2.82  | 0.182 | -1.81 | 0.237 | -2.29 | 0.026 | -2.46  | 0.043 | -2.34  |
| 1458225_at   | Fkbp14                  | FK506 binding protein 14                                                                 | -3.17  | 0.113 | -2.12 | 0.43  | -1.79 | 0.273 | -1.44  | 0.566 | -2.13  |
| 1458967_at   | ---                     | Transcribed locus                                                                        | -1.48  | 0.685 | -3.42 | 0.004 | -2.58 | 0.009 | -1.07  | 0.865 | -2.14  |
| 1434672_at   | Gpr22                   | G protein-coupled receptor 22                                                            | -2.55  | 0.367 | -2.53 | 0.198 | -1.75 | 0.293 | -2.15  | 0.319 | -2.24  |
| 1450806_at   | Tlx3                    | T-cell leukemia, homeobox 3                                                              | -1.8   | 0.003 | -3.9  | 0.149 | -1.82 | 0.104 | -1.21  | 0.634 | -2.18  |
| 1459025_at   | 1700001J04Rik           | RIKEN cDNA 1700001J04 gene                                                               | -1.43  | 0.677 | -3.7  | 0.039 | -2.54 | 0.122 | -1.78  | 0.284 | -2.36  |
| 1453621_at   | Thoc7 /// LOC6708       | THO complex 7 homolog (Drosophila) /// similar to Ngg1 interacting factor 3 like 1       | -2.45  | 0.487 | -2.42 | 0.25  | -1.84 | 0.375 | -1.68  | 0.274 | -2.1   |
| 1437258_at   | Sprr2a                  | small proline-rich protein 2A                                                            | -3.62  | 0.053 | -1.99 | 0.163 | -1.69 | 0.227 | -1.38  | 0.66  | -2.17  |
| 1433023_at   | 2310068G24Rik           | RIKEN cDNA 2310068G24 gene                                                               | -2.52  | 0.198 | -2.26 | 0.014 | -1.88 | 0.028 | -1.42  | 0.332 | -2.02  |
| 1432950_at   | 5330421F21Rik           | RIKEN cDNA 5330421F21 gene                                                               | -3.67  | 0.206 | -3.31 | 0.144 | -1.25 | 0.347 | -1.42  | 0.622 | -2.41  |
| 1433847_at   | D330017J20Rik           | RIKEN cDNA D330017J20 gene                                                               | -2.14  | 0.144 | -3.2  | 0.194 | -1.65 | 0.058 | -1.39  | 0.178 | -2.09  |
| 1443270_at   | ---                     | Adult male hypothalamus cDNA, RIKEN full-length enriched library, clone:A23002           | -2     | 0.093 | -1.79 | 0.039 | -3.03 | 0.009 | -1.06  | 0.913 | -1.97  |
| 1438483_at   | Nos1                    | nitric oxide synthase 1, neuronal                                                        | -4.83  | 0.108 | -1.55 | 0.411 | -1.85 | 0.271 | -1.93  | 0.262 | -2.54  |
| 1458569_at   | Eli2                    | elongation factor RNA polymerase II 2                                                    | -1.71  | 0.088 | -3.05 | 0.249 | -2.09 | 0.307 | -1.39  | 0.524 | -2.06  |
| 1446261_at   | D1Ert507e               | DNA segment, Chr 1, ERATO Doi 507, expressed                                             | -2.81  | 0.402 | -3.81 | 0.004 | -1.29 | 0.638 | -1.04  | 0.786 | -2.24  |
| 1453453_at   | 1700080O16Rik ///       | RIKEN cDNA 1700080O16 gene /// similar to melanoma antigen family A, 5 /// sir           | -3.29  | 0.05  | -3.29 | 0.102 | -1.27 | 0.698 | -1.03  | 0.961 | -2.22  |
| 1459795_at   | Gpr85                   | G protein-coupled receptor 85                                                            | -2.12  | 0.359 | -2.14 | 0.463 | -2.17 | 0.084 | -1.14  | 0.746 | -1.89  |
| 1447329_at   | ---                     | ---                                                                                      | -1.77  | 0.293 | -2.21 | 0.129 | -2.61 | 0.299 | -2.14  | 0.373 | -2.18  |
| 1447288_at   | ---                     | Transcribed locus                                                                        | -3.95  | 0.049 | -1.32 | 0.569 | -2.55 | 0.101 | -1.14  | 0.854 | -2.24  |
| 1457911_at   | A930002I21Rik           | RIKEN cDNA A930002I21 gene                                                               | -3.61  | 0.081 | -1.51 | 0.367 | -2.12 | 0.113 | -1.18  | 0.626 | -2.1   |
| 1417925_at   | Ccl22                   | chemokine (C-C motif) ligand 22                                                          | -1.18  | 0.588 | -2.84 | 0.029 | -4.61 | 0.072 | -2.31  | 0.043 | -2.74  |
| 1441560_at   | Ctnna3                  | catenin (cadherin associated protein), alpha 3                                           | -2.22  | 0.054 | -2.13 | 0.226 | -2.01 | 0.138 | -1.51  | 0.425 | -1.97  |
| 1419740_at   | Pde6b                   | phosphodiesterase 6B, cGMP, rod receptor, beta polypeptide                               | -4.62  | 0.037 | -1.77 | 0.336 | -1.56 | 0.306 | -1.26  | 0.252 | -2.3   |
| 1450825_at   | Asah3                   | N-acylsphingosine amidohydrolase (alkaline ceramidase) 3                                 | -1.44  | 0.611 | -3.76 | 0.038 | -2.17 | 0.275 | -1.52  | 0.628 | -2.22  |

|              |                       |                                                                                     |       |       |        |       |       |       |       |       |       |
|--------------|-----------------------|-------------------------------------------------------------------------------------|-------|-------|--------|-------|-------|-------|-------|-------|-------|
| 1422588_at   | Krt6b                 | keratin 6B                                                                          | -2.16 | 0.301 | -3.29  | 0.285 | -1.52 | 0.326 | -1.04 | 0.953 | -2    |
| 1446251_at   | 4930565A17            | hypothetical protein 4930565A17                                                     | -2.74 | 0.126 | -2.04  | 0.238 | -1.75 | 0.066 | -1.07 | 0.906 | -1.9  |
| 1429424_at   | Cst13                 | cystatin 13                                                                         | -4.95 | 0.083 | -2.71  | 0.075 | -1.17 | 0.801 | -1.23 | 0.729 | -2.52 |
| 1421623_at   | Il12rb2               | interleukin 12 receptor, beta 2                                                     | -1.97 | 0.293 | -2.66  | 0.022 | -1.84 | 0.029 | -1.6  | 0.07  | -2.02 |
| 1459037_at   | Gm1614                | gene model 1614, (NCBI)                                                             | -2.4  | 0.172 | -1.31  | 0.129 | -4.01 | 0.092 | -1.56 | 0.529 | -2.32 |
| 1438901_at   | BC024814              | cDNA sequence BC024814                                                              | -2.34 | 0.106 | -3.04  | 0.045 | -1.48 | 0.331 | -1.95 | 0.292 | -2.2  |
| 1459171_at   | Emp1                  | Epithelial membrane protein 1                                                       | -1.79 | 0.593 | -2.74  | 0.164 | -1.97 | 0.38  | -1.08 | 0.903 | -1.89 |
| 1443209_at   | Hist1h1e              | Histone 1, H1e                                                                      | -2.02 | 0.385 | -2.07  | 0.285 | -2.19 | 0.193 | -1.12 | 0.829 | -1.85 |
| 1425290_at   | Stx19                 | syntaxin 19                                                                         | -3.1  | 0.232 | -2.25  | 0.061 | -1.47 | 0.143 | -1.2  | 0.772 | -2.01 |
| 1458702_at   | 2610316D01Rik         | RIKEN cDNA 2610316D01 gene                                                          | -1.62 | 0.474 | -2.9   | 0.037 | -2.06 | 0.21  | -2.5  | 0.299 | -2.27 |
| 1447183_at   | Odz3                  | Odd Oz/ten-m homolog 3 (Drosophila)                                                 | -2.12 | 0.269 | -1.94  | 0.341 | -2.18 | 0.334 | -1.52 | 0.667 | -1.94 |
| 1459275_at   | Rnf17                 | ring finger protein 17                                                              | -2.41 | 0.28  | -2.01  | 0.296 | -1.87 | 0.179 | -1.18 | 0.728 | -1.87 |
| 1415808_at   | Tpbpa                 | trophoblast specific protein alpha                                                  | -2.55 | 0.085 | -1.96  | 0.329 | -1.83 | 0.259 | -1.45 | 0.459 | -1.95 |
| 1422196_at   | Htr5b                 | 5-hydroxytryptamine (serotonin) receptor 5B                                         | -1.41 | 0.219 | -2.46  | 0.078 | -2.96 | 0.128 | -1.71 | 0.489 | -2.14 |
| 1439607_at   | ---                   | ---                                                                                 | -2.25 | 0.245 | -2.71  | 0.016 | -1.55 | 0.421 | -1.06 | 0.54  | -1.89 |
| 1420213_x_at | ---                   | ---                                                                                 | -2.5  | 0.095 | -1.72  | 0.504 | -2.09 | 0.083 | -3.31 | 0.252 | -2.4  |
| 1419019_a_at | Akap4                 | A kinase (PRKA) anchor protein 4                                                    | -2.32 | 0.28  | -2.14  | 0.331 | -1.77 | 0.392 | -1.4  | 0.039 | -1.91 |
| 1443618_at   | Pdzd2                 | PDZ domain containing 2                                                             | -1.43 | 0.292 | -2.67  | 0.153 | -2.53 | 0.057 | -1.78 | 0.225 | -2.1  |
| 1420343_at   | Gzmd                  | granzyme D                                                                          | -2.16 | 0.319 | -2.57  | 0.08  | -1.61 | 0.347 | -1.08 | 0.473 | -1.86 |
| 1444192_at   | 9630020C08Rik         | RIKEN cDNA 9630020C08 gene                                                          | -2.9  | 0.283 | -2.67  | 0.083 | -1.33 | 0.307 | -1.95 | 0.404 | -2.21 |
| 1445666_at   | D15Wsu169e            | DNA segment, Chr 15, Wayne State University 169, expressed                          | -1.54 | 0.356 | -2.97  | 0.015 | -2.06 | 0.06  | -1.01 | 0.976 | -1.89 |
| 1457808_at   | LOC432842             | hypothetical LOC432842                                                              | -1.93 | 0.549 | -2.43  | 0.129 | -1.83 | 0.181 | -1.06 | 0.261 | -1.81 |
| 1453079_at   | 5730494M16Rik         | RIKEN cDNA 5730494M16 gene                                                          | -1.92 | 0.168 | -2.56  | 0.03  | -1.76 | 0.165 | -3.49 | 0.02  | -2.43 |
| 1419328_at   | Sema4f                | sema domain, immunoglobulin domain (Ig), TM domain, and short cytoplasmic dc        | -3.99 | 0.172 | -2.92  | 0.236 | -1.13 | 0.079 | -1.45 | 0.415 | -2.37 |
| 1453486_a_at | Scube2                | signal peptide, CUB domain, EGF-like 2                                              | -2.61 | 0.159 | -1.91  | 0.152 | -1.74 | 0.171 | -1.03 | 0.881 | -1.82 |
| 1416905_at   | Guca2a                | guanylate cyclase activator 2a (guanylin)                                           | -2    | 0.205 | -2.58  | 0.028 | -1.67 | 0.201 | -1.98 | 0.377 | -2.06 |
| 1449838_at   | Crisp3                | cysteine-rich secretory protein 3                                                   | -1.4  | 0.388 | -2.34  | 0.215 | -2.9  | 0.209 | -2.89 | 0.156 | -2.38 |
| 1454173_at   | Sh2d4b                | SH2 domain containing 4B                                                            | -2.1  | 0.02  | -1.71  | 0.527 | -2.33 | 0.097 | -1.83 | 0.28  | -1.99 |
| 1447067_at   | ---                   | ---                                                                                 | -3.51 | 0.073 | -2.33  | 0.118 | -1.29 | 0.609 | -1.48 | 0.384 | -2.15 |
| 1427215_at   | Acsm2                 | acyl-CoA synthetase medium-chain family member 2                                    | -1.31 | 0.15  | -4.37  | 0.003 | -2.01 | 0.184 | -2.39 | 0.345 | -2.52 |
| 1429840_at   | 4933439G12Rik         | RIKEN cDNA 4933439G12 gene                                                          | -3.08 | 0.175 | -1.3   | 0.425 | -2.49 | 0.056 | -1.47 | 0.427 | -2.09 |
| 1457558_at   | A330050F15Rik         | RIKEN cDNA A330050F15 gene                                                          | -2.37 | 0.077 | -1.73  | 0.312 | -2.02 | 0.166 | -1.36 | 0.62  | -1.87 |
| 1458593_at   | Fbn1                  | Fibrillin 1                                                                         | -1.79 | 0.12  | -2.61  | 0.191 | -1.8  | 0.361 | -1.36 | 0.527 | -1.89 |
| 1426171_x_at | Klra7                 | killer cell lectin-like receptor, subfamily A, member 7                             | -1.73 | 0.046 | -3.8   | 0.256 | -1.52 | 0.324 | -2.6  | 0.038 | -2.41 |
| 1455925_at   | Prdm8                 | PR domain containing 8                                                              | -3.25 | 0.016 | -2.09  | 0.116 | -1.41 | 0.229 | -2.13 | 0.018 | -2.22 |
| 1445054_at   | Foxn2                 | Forkhead box N2                                                                     | -1.65 | 0.258 | -2.87  | 0.164 | -1.84 | 0.114 | -1.87 | 0.278 | -2.06 |
| 1448107_x_at | Klk1                  | kallikrein 1                                                                        | -1.34 | 0.01  | -10.89 | 0.127 | -1.51 | 0.239 | -2.45 | 0.082 | -4.05 |
| 1443646_at   | Igsf10                | immunoglobulin superfamily, member 10                                               | -2.18 | 0.494 | -1.97  | 0.283 | -1.87 | 0.235 | -1.48 | 0.626 | -1.87 |
| 1450331_s_at | V2r4 /// V2r5 /// LOC | vomeroneasal 2, receptor, 4 /// vomeronasal 2, receptor, 5 /// similar to vomeronas | -1.85 | 0.098 | -2.71  | 0.289 | -1.68 | 0.331 | -1.58 | 0.35  | -1.95 |
| 1445580_at   | Matn2                 | Matrilin 2                                                                          | -2.41 | 0.508 | -2.21  | 0.324 | -1.56 | 0.515 | -2.27 | 0.149 | -2.11 |
| 1429636_at   | 1700010D01Rik ///     | RIKEN cDNA 1700010D01 gene /// similar to hypothetical protein LOC76386             | -2.43 | 0.476 | -1.56  | 0.126 | -2.17 | 0.299 | -1.09 | 0.784 | -1.81 |
| 1446128_at   | Ebf2                  | Early B-cell factor 2                                                               | -1.7  | 0.374 | -1.76  | 0.312 | -2.79 | 0.037 | -1.64 | 0.359 | -1.98 |
| 1439661_at   | Slc16a14              | solute carrier family 16 (monocarboxylic acid transporters), member 14              | -1.98 | 0.414 | -2.63  | 0.176 | -1.59 | 0.357 | -1.76 | 0.018 | -1.99 |
| 1444427_at   | D930038D03Rik         | RIKEN cDNA D930038D03 gene                                                          | -2.81 | 0.432 | -1.66  | 0.238 | -1.8  | 0.21  | -1.68 | 0.339 | -1.99 |
| 1430842_at   | 1500002F19Rik         | RIKEN cDNA 1500002F19 gene                                                          | -3.11 | 0.018 | -1.55  | 0.442 | -1.81 | 0.071 | -1.23 | 0.325 | -1.93 |
| 1459988_at   | Mbd3l2                | methyl-CpG binding domain protein 3-like 2                                          | -2.68 | 0.03  | -3.4   | 0     | -1.18 | 0.593 | -1.12 | 0.513 | -2.1  |
| 1456684_at   | Tmem74                | transmembrane protein 74                                                            | -2.26 | 0.412 | -2.43  | 0.092 | -1.5  | 0.057 | -1.12 | 0.589 | -1.83 |
| 1447552_s_at | Ctnnd2                | Catenin (cadherin associated protein), delta 2                                      | -1.82 | 0.371 | -1.87  | 0.372 | -2.28 | 0.19  | -1.6  | 0.3   | -1.89 |
| 1459841_x_at | Laptm5                | lysosomal-associated protein transmembrane 5                                        | -2.97 | 0.104 | -2.25  | 0.044 | -1.34 | 0.467 | -1.27 | 0.554 | -1.96 |
| 1444492_at   | Ptprd                 | protein tyrosine phosphatase, receptor type, D                                      | -2.17 | 0.131 | -2.5   | 0.034 | -1.51 | 0.514 | -3.16 | 0.02  | -2.33 |
| 1429703_at   | 2900072G11Rik         | RIKEN cDNA 2900072G11 gene                                                          | -1.41 | 0.142 | -2.39  | 0.088 | -2.52 | 0.02  | -1.2  | 0.603 | -1.88 |
| 1420448_at   | Rhox2                 | reproductive homeobox 2                                                             | -2.46 | 0.046 | -2.53  | 0.012 | -1.38 | 0.36  | -1.15 | 0.66  | -1.88 |
| 1446132_at   | ---                   | ---                                                                                 | -2.42 | 0.211 | -1.35  | 0.522 | -2.61 | 0.036 | -1.01 | 0.983 | -1.85 |

|              |                    |                                                                                    |       |       |       |       |       |       |       |       |       |
|--------------|--------------------|------------------------------------------------------------------------------------|-------|-------|-------|-------|-------|-------|-------|-------|-------|
| 1433163_at   | 6230414M07Rik      | RIKEN cDNA 6230414M07 gene                                                         | -2.25 | 0.015 | -3.91 | 0.015 | -1.19 | 0.159 | -1.52 | 0.14  | -2.22 |
| 1455977_x_at | Klk1 /// Klk1b5    | kallikrein 1 /// kallikrein 1-related peptidase b5                                 | -1.42 | 0.048 | -8.54 | 0.101 | -1.4  | 0.424 | -3.26 | 0.203 | -3.65 |
| 1458854_at   | C78891             | expressed sequence C78891                                                          | -1.9  | 0.394 | -4.27 | 0.029 | -1.28 | 0.608 | -1.43 | 0.522 | -2.22 |
| 1422956_at   | D1Pas1             | DNA segment, Chr 1, Pasteur Institute 1                                            | -3.32 | 0.328 | -3.59 | 0.047 | -1.04 | 0.844 | -1.31 | 0.452 | -2.31 |
| 1454585_at   | 1110065P19Rik      | RIKEN cDNA 1110065P19 gene                                                         | -3.72 | 0.008 | -1.9  | 0.427 | -1.34 | 0.491 | -1.02 | 0.983 | -2    |
| 1432992_at   | 4930403L11Rik      | RIKEN cDNA 4930403L11 gene                                                         | -2.43 | 0.332 | -1.56 | 0.308 | -2.04 | 0.064 | -1.21 | 0.763 | -1.81 |
| 1444882_at   | ---                | ---                                                                                | -2.3  | 0.113 | -2.53 | 0.19  | -1.39 | 0.56  | -2.29 | 0.244 | -2.13 |
| 1457589_at   | Fat3               | FAT tumor suppressor homolog 3 (Drosophila)                                        | -2.72 | 0.039 | -2.35 | 0.147 | -1.32 | 0.045 | -1.31 | 0.613 | -1.93 |
| 1430732_at   | 4921525D07Rik      | RIKEN cDNA 4921525D07 gene                                                         | -1.08 | 0.91  | -3.08 | 0.006 | -3.35 | 0.113 | -1.09 | 0.917 | -2.15 |
| 1454821_at   | B3gat1             | beta-1,3-glucuronyltransferase 1 (glucuronosyltransferase P)                       | -2.08 | 0.487 | -1.29 | 0.332 | -3.37 | 0.003 | -1.33 | 0.195 | -2.02 |
| 1443469_at   | ---                | Transcribed locus                                                                  | -2.13 | 0.482 | -2.63 | 0.018 | -1.42 | 0.645 | -1.18 | 0.758 | -1.84 |
| 1442728_at   | Nasp               | Nuclear autoantigenic sperm protein (histone-binding)                              | -2.66 | 0.452 | -1.91 | 0.19  | -1.52 | 0.193 | -1.61 | 0.617 | -1.92 |
| 1430785_at   | Sdro               | orphan short chain dehydrogenase/reductase                                         | -3.07 | 0.069 | -1.33 | 0.232 | -2.07 | 0.082 | -1.15 | 0.717 | -1.9  |
| 1418218_at   | Ceacam9            | CEA-related cell adhesion molecule 9                                               | -3.53 | 0.004 | -1.16 | 0.592 | -2.39 | 0.05  | -1.31 | 0.383 | -2.1  |
| 1433435_at   | AW551984           | expressed sequence AW551984                                                        | -2.88 | 0.05  | -1.37 | 0.039 | -2.04 | 0.148 | -1.55 | 0.236 | -1.96 |
| 1448906_at   | Cdh16              | cadherin 16                                                                        | -1.15 | 0.13  | -2.52 | 0.265 | -3.34 | 0.016 | -1.11 | 0.9   | -2.03 |
| 1444733_at   | ---                | Transcribed locus                                                                  | -1.98 | 0.252 | -1.42 | 0.365 | -2.78 | 0.178 | -2.72 | 0.117 | -2.22 |
| 1420084_at   | ---                | Transcribed locus                                                                  | -1.98 | 0.003 | -1.92 | 0.227 | -1.83 | 0.33  | -1.18 | 0.192 | -1.73 |
| 1424972_at   | ---                | ---                                                                                | -2.21 | 0.129 | -1.59 | 0.447 | -2.03 | 0.056 | -1.19 | 0.571 | -1.76 |
| 1422089_at   | Ncr1               | natural cytotoxicity triggering receptor 1                                         | -2.45 | 0.057 | -1.63 | 0.368 | -1.82 | 0.142 | -1.44 | 0.072 | -1.83 |
| 1430226_at   | Xlr4c              | X-linked lymphocyte-regulated 4C                                                   | -2.27 | 0.497 | -1.96 | 0.29  | -1.61 | 0.311 | -2.9  | 0.031 | -2.18 |
| 1439725_at   | Ptptr              | protein tyrosine phosphatase, receptor type, T                                     | -2.19 | 0.133 | -3.35 | 0     | -1.22 | 0.358 | -1.32 | 0.617 | -2.02 |
| 1421080_at   | Nr4a3              | nuclear receptor subfamily 4, group A, member 3                                    | -2.17 | 0.299 | -2.3  | 0.033 | -1.47 | 0.182 | -1.19 | 0.413 | -1.78 |
| 1458525_at   | App                | Amyloid beta (A4) precursor protein                                                | -1.27 | 0.525 | -3.63 | 0.141 | -1.95 | 0.024 | -1.34 | 0.076 | -2.05 |
| 1458068_at   | 4932417H02Rik      | RIKEN cDNA 4932417H02 gene                                                         | -1.88 | 0.515 | -2.66 | 0.075 | -1.49 | 0.624 | -1.05 | 0.894 | -1.77 |
| 1444081_at   | 5033428A16Rik      | RIKEN cDNA 5033428A16 gene                                                         | -2.12 | 0.11  | -3.76 | 0.139 | -1.19 | 0.827 | -1.05 | 0.933 | -2.03 |
| 1451062_a_at | Pex2               | peroxin 2                                                                          | -1.67 | 0.478 | -2.43 | 0.427 | -1.75 | 0.33  | -1.8  | 0.242 | -1.91 |
| 1434877_at   | Nptx1              | neuronal pentraxin 1                                                               | -1.44 | 0.591 | -4.49 | 0.034 | -1.5  | 0.339 | -1.82 | 0.351 | -2.31 |
| 1445929_at   | Kcnk2              | Potassium channel, subfamily K, member 2                                           | -1.25 | 0.653 | -2.62 | 0.072 | -2.51 | 0.024 | -1.11 | 0.894 | -1.87 |
| 1421774_at   | Vax1               | ventral anterior homeobox containing gene 1                                        | -2.6  | 0.396 | -1.19 | 0.718 | -2.79 | 0.107 | -1.47 | 0.389 | -2.01 |
| 1455891_at   | 4933425K02Rik      | RIKEN cDNA 4933425K02 gene                                                         | -1.75 | 0.324 | -1.96 | 0.494 | -1.98 | 0.139 | -1.03 | 0.957 | -1.68 |
| 1448006_at   | Zc3h7b             | zinc finger CCCH type containing 7B                                                | -1.43 | 0.396 | -2.21 | 0.052 | -2.29 | 0.164 | -1.62 | 0.018 | -1.89 |
| 1459778_at   | Rpn1               | Ribophorin I                                                                       | -2.18 | 0.178 | -1.53 | 0.244 | -2.11 | 0.159 | -2.17 | 0.156 | -1.99 |
| 1427825_at   | ---                | ---                                                                                | -4.13 | 0     | -1.23 | 0.667 | -1.86 | 0.382 | -1.04 | 0.943 | -2.07 |
| 1430405_at   | ---                | ---                                                                                | -2.36 | 0.024 | -1.46 | 0.386 | -2.05 | 0.014 | -1.02 | 0.977 | -1.72 |
| 1444253_at   | Adamts18           | a disintegrin-like and metallopeptidase (reprolysin type) with thrombospondin type | -2.2  | 0.202 | -2.02 | 0.466 | -1.54 | 0.445 | -1.24 | 0.69  | -1.75 |
| 1433036_at   | 4930564B12Rik      | RIKEN cDNA 4930564B12 gene                                                         | -1.79 | 0.303 | -2.4  | 0.044 | -1.61 | 0.378 | -1.15 | 0.828 | -1.74 |
| 1446903_at   | Angpt2             | Angiopoietin 2                                                                     | -2.26 | 0.243 | -1.77 | 0.061 | -1.68 | 0.315 | -3.13 | 0.087 | -2.21 |
| 1430714_at   | 4930451C15Rik      | RIKEN cDNA 4930451C15 gene                                                         | -2.7  | 0.316 | -2.93 | 0.004 | -1.12 | 0.685 | -1.06 | 0.906 | -1.95 |
| 1454435_at   | 5530400N10Rik      | RIKEN cDNA 5530400N10 gene                                                         | -3.34 | 0.396 | -3.07 | 0.225 | -1.02 | 0.899 | -1.07 | 0.666 | -2.13 |
| 1457918_at   | Tnfaip2            | Tumor necrosis factor, alpha-induced protein 2                                     | -2.47 | 0.022 | -1.86 | 0.098 | -1.51 | 0.095 | -1.11 | 0.585 | -1.74 |
| 1432399_a_at | Epha1              | Eph receptor A1                                                                    | -2.14 | 0.337 | -2.52 | 0.379 | -1.35 | 0.405 | -1.53 | 0.657 | -1.89 |
| 1437326_x_at | Ela3 /// LOC638418 | elastase 3, pancreatic /// similar to elastase 3B, pancreatic                      | -2.6  | 0.409 | -2.08 | 0.222 | -1.35 | 0.346 | -2.77 | 0.157 | -2.2  |
| 1427545_at   | Scml4              | sex comb on midleg-like 4 (Drosophila)                                             | -1.74 | 0.183 | -1.97 | 0.363 | -1.91 | 0.154 | -3.18 | 0.018 | -2.2  |
| 1447385_at   | ---                | Adult male corpora quadrigemina cDNA, RIKEN full-length enriched library, clone    | -2.17 | 0.146 | -2.93 | 0.023 | -1.24 | 0.126 | -1.72 | 0.225 | -2.02 |
| 1452028_a_at | Cdh23              | cadherin 23 (otocadherin)                                                          | -1.41 | 0.161 | -3.08 | 0.215 | -1.73 | 0.255 | -1.14 | 0.858 | -1.84 |
| 1422282_at   | Tacr1              | tachykinin receptor 1                                                              | -2.11 | 0.231 | -1.46 | 0.581 | -2.21 | 0.208 | -1.39 | 0.057 | -1.79 |
| 1457077_at   | ---                | 2 days neonate sympathetic ganglion cDNA, RIKEN full-length enriched library, c    | -2.69 | 0.292 | -2.12 | 0.058 | -1.3  | 0.204 | -1.21 | 0.441 | -1.83 |
| 1450524_at   | Cldn9              | claudin 9                                                                          | -1.54 | 0.592 | -2.92 | 0.004 | -1.61 | 0.117 | -1.39 | 0.008 | -1.86 |
| 1457604_x_at | Cyp11a1            | cytochrome P450, family 11, subfamily a, polypeptide 1                             | -1.45 | 0.239 | -3.21 | 0.058 | -1.63 | 0.354 | -2    | 0.244 | -2.07 |
| 1453423_at   | 4933409L14Rik      | RIKEN cDNA 4933409L14 gene                                                         | -3.08 | 0.368 | -1.88 | 0.235 | -1.32 | 0.274 | -1.01 | 0.99  | -1.82 |
| 1447305_at   | Tcba1              | T-cell lymphoma breakpoint associated target 1                                     | -2.73 | 0.021 | -2.14 | 0.112 | -1.28 | 0.357 | -1.16 | 0.687 | -1.83 |
| 1450532_at   | 2310002J15Rik      | RIKEN cDNA 2310002J15 gene                                                         | -3.03 | 0.169 | -1.78 | 0.254 | -1.38 | 0.216 | -1.21 | 0.171 | -1.85 |

|              |               |                                                                                  |       |       |       |       |       |       |       |       |       |
|--------------|---------------|----------------------------------------------------------------------------------|-------|-------|-------|-------|-------|-------|-------|-------|-------|
| 1447081_at   | ---           | ---                                                                              | -2.14 | 0.451 | -3.53 | 0.01  | -1.15 | 0.535 | -2.25 | 0.064 | -2.27 |
| 1456185_at   | Nalp9a        | NACHT, LRR and PYD containing protein 9a                                         | -3.01 | 0.264 | -1.44 | 0.604 | -1.68 | 0.183 | -1.67 | 0.397 | -1.95 |
| 1455148_at   | Tmem130       | transmembrane protein 130                                                        | -3.88 | 0.013 | -1.39 | 0.415 | -1.55 | 0.51  | -2.32 | 0.393 | -2.29 |
| 1431357_a_at | Rpgrip1       | retinitis pigmentosa GTPase regulator interacting protein 1                      | -1.81 | 0.202 | -2.98 | 0.034 | -1.36 | 0.31  | -1.32 | 0.714 | -1.87 |
| 1446841_at   | ---           | 12 days embryo spinal ganglion cDNA, RIKEN full-length enriched library, clone:5 | -1.7  | 0.024 | -2.04 | 0.151 | -1.84 | 0.088 | -1.51 | 0.425 | -1.77 |
| 1432258_at   | 9430014N10Rik | RIKEN cDNA 9430014N10 gene                                                       | -1.76 | 0.017 | -2.08 | 0.385 | -1.74 | 0.363 | -1.54 | 0.17  | -1.78 |
| 1441316_at   | LOC677060     | similar to wingless related MMTV integration site 8b                             | -2.53 | 0.378 | -1.91 | 0.106 | -1.42 | 0.171 | -2.52 | 0.243 | -2.1  |
| 1445131_at   | Fbxl13        | F-box and leucine-rich repeat protein 13                                         | -3.25 | 0.372 | -1.3  | 0.598 | -1.83 | 0.298 | -1.34 | 0.677 | -1.93 |
| 1430779_at   | Ntn1          | netrin 1                                                                         | -1.6  | 0.346 | -3.38 | 0.001 | -1.42 | 0.031 | -1.89 | 0.128 | -2.07 |
| 1437970_at   | BC053401      | CDNA sequence BC053401                                                           | -3.22 | 0.188 | -1.19 | 0.672 | -2.11 | 0.188 | -2.33 | 0.31  | -2.21 |
| 1459056_at   | Rasgrf1       | RAS protein-specific guanine nucleotide-releasing factor 1                       | -3.31 | 0.062 | -1.67 | 0.477 | -1.38 | 0.064 | -1.01 | 0.979 | -1.84 |
| 1444529_at   | LOC666806     | similar to X-linked eukaryotic translation initiation factor 1A                  | -4.85 | 0.005 | -1.12 | 0.901 | -1.9  | 0.192 | -1.46 | 0.69  | -2.33 |
| 1432682_at   | 5530400K19Rik | RIKEN cDNA 5530400K19 gene                                                       | -2.3  | 0.163 | -2.17 | 0.306 | -1.37 | 0.376 | -1.89 | 0.111 | -1.93 |
| 1435974_at   | Arhgef9       | Cdc42 guanine nucleotide exchange factor (GEF) 9                                 | -2.72 | 0.321 | -2.51 | 0.462 | -1.16 | 0.737 | -1.26 | 0.35  | -1.91 |
| 1443533_at   | Ppp2r5e       | Protein phosphatase 2, regulatory subunit B (B56), epsilon isoform               | -1.87 | 0.018 | -1.44 | 0.042 | -2.5  | 0.053 | -1.36 | 0.087 | -1.79 |
| 1446607_at   | Mtap7         | Microtubule-associated protein 7                                                 | -2.89 | 0.466 | -1.31 | 0.59  | -1.91 | 0.071 | -2.57 | 0.434 | -2.17 |
| 1443802_at   | Tnik          | TRAF2 and NCK interacting kinase                                                 | -1.91 | 0.04  | -2.47 | 0.082 | -1.42 | 0.323 | -1.69 | 0.076 | -1.87 |
| 1444652_at   | B830004H01Rik | RIKEN cDNA B830004H01 gene                                                       | -1.52 | 0.515 | -3.64 | 0.058 | -1.42 | 0.587 | -1.55 | 0.592 | -2.03 |
| 1426167_a_at | Camk4         | calcium/calmodulin-dependent protein kinase IV                                   | -2.61 | 0.062 | -2.05 | 0.198 | -1.31 | 0.483 | -1.55 | 0.087 | -1.88 |
| 1438237_at   | Rex2          | reduced expression 2                                                             | -4    | 0.349 | -1.36 | 0.197 | -1.54 | 0.387 | -1.19 | 0.439 | -2.02 |
| 1447988_at   | ---           | ---                                                                              | -1.6  | 0.117 | -1.5  | 0.573 | -2.9  | 0.001 | -1.12 | 0.681 | -1.78 |
| 1457619_at   | BC015286      | cDNA sequence BC015286                                                           | -1.99 | 0.311 | -1.75 | 0.425 | -1.77 | 0.019 | -1.61 | 0.114 | -1.78 |
| 1433399_at   | 2900078I11Rik | RIKEN cDNA 2900078I11 gene                                                       | -1.25 | 0.499 | -2.4  | 0.396 | -2.36 | 0.042 | -1.16 | 0.444 | -1.79 |
| 1460508_at   | Mrpl1         | mitochondrial ribosomal protein L1                                               | -3.42 | 0.018 | -2.13 | 0.211 | -1.14 | 0.758 | -1.26 | 0.711 | -1.99 |
| 1444568_at   | Arpc5         | Actin related protein 2/3 complex, subunit 5                                     | -2.81 | 0.005 | -1.55 | 0.437 | -1.56 | 0.171 | -2.04 | 0.452 | -1.99 |
| 1422396_s_at | Ascl2         | achaete-scute complex homolog-like 2 (Drosophila)                                | -2.52 | 0.395 | -1.14 | 0.815 | -2.72 | 0.089 | -2.93 | 0.369 | -2.33 |
| 1443242_at   | D5Etd121e     | DNA segment, Chr 5, ERATO Doi 121, expressed                                     | -2.53 | 0.181 | -1.68 | 0.062 | -1.53 | 0.051 | -1.55 | 0.173 | -1.82 |
| 1420605_at   | Mtag2         | metastasis associated gene 2                                                     | -2.05 | 0.397 | -1.99 | 0.228 | -1.52 | 0.286 | -1.82 | 0.115 | -1.85 |
| 1458166_at   | Phf21a        | PHD finger protein 21A                                                           | -1.81 | 0.281 | -1.64 | 0.228 | -2.05 | 0.009 | -1.23 | 0.696 | -1.68 |
| 1460219_at   | Mag           | myelin-associated glycoprotein                                                   | -2.7  | 0.154 | -2.33 | 0.247 | -1.17 | 0.368 | -1.07 | 0.515 | -1.82 |
| 1446334_at   | ---           | ---                                                                              | -3.94 | 0.013 | -1.84 | 0.45  | -1.17 | 0.775 | -1.03 | 0.903 | -1.99 |
| 1456654_at   | Paqr5         | progesterone and adipoQ receptor family member V                                 | -1.19 | 0.074 | -3.35 | 0.043 | -1.94 | 0.137 | -1.34 | 0.324 | -1.95 |
| 1436398_at   | Lef1          | Lymphoid enhancer binding factor 1                                               | -1.36 | 0.269 | -2.01 | 0.236 | -2.36 | 0.022 | -6.05 | 0.025 | -2.95 |
| 1442734_at   | ---           | ---                                                                              | -1.89 | 0.185 | -1.46 | 0.607 | -2.26 | 0.084 | -1.44 | 0.591 | -1.76 |
| 1459739_at   | E130308A19Rik | RIKEN cDNA E130308A19 gene                                                       | -2.44 | 0.208 | -1.41 | 0.587 | -1.86 | 0.216 | -1.27 | 0.667 | -1.74 |
| 1420230_at   | AA414993      | expressed sequence AA414993                                                      | -2.76 | 0.043 | -2.01 | 0.028 | -1.25 | 0.502 | -1.95 | 0.039 | -1.99 |
| 1457654_at   | ---           | Transcribed locus, moderately similar to NP_598437.1 O-sialoglycoprotein endop   | -2.07 | 0.018 | -1.29 | 0.659 | -2.5  | 0.007 | -1.25 | 0.648 | -1.78 |
| 1443417_at   | C87122        | expressed sequence C87122                                                        | -1.59 | 0.134 | -2.07 | 0.221 | -1.83 | 0.219 | -1.14 | 0.269 | -1.66 |
| 1454083_at   | 4930440C22Rik | RIKEN cDNA 4930440C22 gene                                                       | -1.27 | 0.767 | -2.29 | 0.064 | -2.31 | 0.376 | -1.26 | 0.673 | -1.78 |
| 1419788_at   | ---           | Transcribed locus                                                                | -1.47 | 0.224 | -2.79 | 0.02  | -1.61 | 0.107 | -2.04 | 0.31  | -1.98 |
| 1440753_at   | ---           | Transcribed locus                                                                | -1.34 | 0.198 | -2.33 | 0.066 | -2.06 | 0.241 | -1.58 | 0.328 | -1.83 |
| 1427402_at   | Polr2f        | polymerase (RNA) II (DNA directed) polypeptide F                                 | -2.12 | 0.094 | -2.69 | 0.283 | -1.22 | 0.105 | -1.07 | 0.704 | -1.78 |
| 1437501_at   | AF529169      | cDNA sequence AF529169                                                           | -3.7  | 0.108 | -1.51 | 0.417 | -1.37 | 0.58  | -1.02 | 0.968 | -1.9  |
| 1459498_at   | ---           | ---                                                                              | -2.95 | 0.137 | -1.6  | 0.506 | -1.43 | 0.498 | -1.34 | 0.435 | -1.83 |
| 1444887_at   | C79015        | expressed sequence C79015                                                        | -1.25 | 0.779 | -2.54 | 0.144 | -2.12 | 0.241 | -1.41 | 0.509 | -1.83 |
| 1447319_at   | ---           | ---                                                                              | -2.77 | 0.222 | -1.17 | 0.689 | -2.22 | 0.016 | -1.74 | 0.413 | -1.98 |
| 1427126_at   | Hspa1b        | heat shock protein 1B                                                            | -1.45 | 0.279 | -1.7  | 0.141 | -2.58 | 0.198 | -1.83 | 0.537 | -1.89 |
| 1422523_at   | Si            | silver                                                                           | -1.46 | 0.013 | -3.07 | 0.022 | -1.53 | 0.141 | -1.82 | 0.334 | -1.97 |
| 1446984_at   | Prtg          | Protogenin homolog (Gallus gallus)                                               | -1.22 | 0.811 | -4.74 | 0.179 | -1.56 | 0.387 | -1.82 | 0.454 | -2.34 |
| 1447236_at   | Kif21a        | kinesin family member 21A                                                        | -3.11 | 0.053 | -2.12 | 0.271 | -1.14 | 0.769 | -2.37 | 0.284 | -2.18 |
| 1446746_at   | Osbpl3        | Oxysterol binding protein-like 3                                                 | -1.92 | 0.292 | -2.7  | 0.191 | -1.28 | 0.504 | -2.33 | 0.4   | -2.06 |
| 1419514_at   | Pitx1         | paired-like homeodomain transcription factor 1                                   | -2.95 | 0.087 | -1.39 | 0.489 | -1.64 | 0.108 | -1.06 | 0.909 | -1.76 |
| 1432132_at   | 4933401D09Rik | RIKEN cDNA 4933401D09 gene                                                       | -1.29 | 0.764 | -1.76 | 0.475 | -3    | 0.108 | -2.08 | 0.292 | -2.03 |

|              |                       |                                                                                        |       |       |       |       |       |       |       |       |       |
|--------------|-----------------------|----------------------------------------------------------------------------------------|-------|-------|-------|-------|-------|-------|-------|-------|-------|
| 1458110_at   | D430030G11Rik         | RIKEN cDNA D430030G11 gene                                                             | -1.87 | 0.052 | -2.05 | 0.06  | -1.53 | 0.254 | -1.16 | 0.628 | -1.65 |
| 1442605_at   | Bach2                 | BTB and CNC homology 2                                                                 | -1.9  | 0.023 | -1.74 | 0.107 | -1.74 | 0.107 | -2.51 | 0.116 | -1.97 |
| 1419011_at   | Cryba2                | crystallin, beta A2                                                                    | -1.88 | 0.357 | -2.33 | 0.119 | -1.39 | 0.469 | -2.14 | 0.335 | -1.93 |
| 1422037_at   | Dlx3                  | distal-less homeobox 3                                                                 | -1.18 | 0.57  | -2.4  | 0.137 | -2.41 | 0.022 | -2.24 | 0.107 | -2.06 |
| 1455277_at   | Hhip                  | Hedgehog-interacting protein                                                           | -1.85 | 0.334 | -1.31 | 0.452 | -2.65 | 0.008 | -1.54 | 0.512 | -1.84 |
| 1439529_at   | A430110N23Rik         | RIKEN cDNA A430110N23 gene                                                             | -4.17 | 0.208 | -2    | 0.146 | -1.06 | 0.872 | -1.28 | 0.636 | -2.13 |
| 1455561_at   | Cndp1                 | carnosine dipeptidase 1 (metallopeptidase M20 family)                                  | -1.28 | 0.265 | -2.23 | 0.057 | -2.22 | 0.1   | -1.18 | 0.651 | -1.73 |
| 1443277_at   | Ndst3                 | N-deacetylase/N-sulfotransferase (heparan glucosaminyl) 3                              | -1.42 | 0.52  | -6.15 | 0.075 | -1.22 | 0.669 | -1.47 | 0.251 | -2.57 |
| 1457667_x_at | Dyrk2                 | dual-specificity tyrosine-(Y)-phosphorylation regulated kinase 2                       | -2.19 | 0.236 | -2.98 | 0.293 | -1.12 | 0.776 | -1.29 | 0.48  | -1.89 |
| 1432022_at   | Cdgap                 | Cdc42 GTPase-activating protein                                                        | -1.3  | 0.048 | -2.41 | 0.053 | -2    | 0.019 | -1.07 | 0.624 | -1.69 |
| 1448030_at   | 1700023D09Rik         | RIKEN cDNA 1700023D09 gene                                                             | -3.97 | 0.067 | -2.19 | 0.083 | -1.02 | 0.921 | -2.92 | 0.181 | -2.53 |
| 1432895_at   | 9030409K20Rik         | RIKEN cDNA 9030409K20 gene                                                             | -2.43 | 0.189 | -1.91 | 0.076 | -1.33 | 0.506 | -1.43 | 0.46  | -1.77 |
| 1432015_a_at | 4933428M03Rik         | RIKEN cDNA 4933428M03 gene                                                             | -2.25 | 0.002 | -1.12 | 0.876 | -2.88 | 0.015 | -1.71 | 0.306 | -1.99 |
| 1433061_at   | 4933423L19Rik         | RIKEN cDNA 4933423L19 gene                                                             | -2.13 | 0.326 | -1.84 | 0.328 | -1.48 | 0.061 | -2.1  | 0.301 | -1.89 |
| 1458231_at   | ---                   | PREDICTED: Mus musculus similar to Zinc finger protein 195 (LOC625519), mR             | -1.29 | 0.406 | -2.55 | 0.185 | -1.93 | 0.348 | -1.04 | 0.931 | -1.7  |
| 1460071_at   | Sap30l                | SAP30-like                                                                             | -1.57 | 0.629 | -1.71 | 0.085 | -2.14 | 0.048 | -4.07 | 0.022 | -2.37 |
| 1427952_at   | Aipl1                 | aryl hydrocarbon receptor-interacting protein-like 1                                   | -1.59 | 0.289 | -2.43 | 0.435 | -1.54 | 0.209 | -1.9  | 0.211 | -1.87 |
| 1432145_at   | 2310026I22Rik         | RIKEN cDNA 2310026I22 gene                                                             | -1.47 | 0.595 | -2.5  | 0.025 | -1.64 | 0.432 | -1.83 | 0.39  | -1.86 |
| 1457982_at   | 1700052M18Rik         | RIKEN cDNA 1700052M18 gene                                                             | -1.94 | 0.044 | -1.47 | 0.329 | -2.02 | 0.134 | -1.22 | 0.632 | -1.66 |
| 1431240_at   | Clec2h                | C-type lectin domain family 2, member h                                                | -1.13 | 0.736 | -4.18 | 0.2   | -1.76 | 0.381 | -1.09 | 0.814 | -2.04 |
| 1442893_at   | Ctnna2                | Catenin (cadherin associated protein), alpha 2                                         | -1.8  | 0.263 | -1.84 | 0.187 | -1.69 | 0.311 | -1.98 | 0.366 | -1.83 |
| 1445279_at   | ---                   | Transcribed locus                                                                      | -1.88 | 0.303 | -3.24 | 0.033 | -1.17 | 0.566 | -2.09 | 0.345 | -2.1  |
| 1459640_at   | ---                   | ---                                                                                    | -1.32 | 0.559 | -2.26 | 0.227 | -2.02 | 0.12  | -1.18 | 0.736 | -1.7  |
| 1422391_at   | V1rc3                 | vomeroneasal 1 receptor, C3                                                            | -1.08 | 0.721 | -3.12 | 0.344 | -2.25 | 0.162 | -2.65 | 0.139 | -2.27 |
| 1453291_at   | Hmgb2l1               | high mobility group box 2-like 1                                                       | -1.93 | 0.01  | -2.27 | 0.138 | -1.36 | 0.102 | -1.11 | 0.524 | -1.66 |
| 1456370_s_at | 0610037L13Rik         | RIKEN cDNA 0610037L13 gene                                                             | -2.14 | 0.14  | -1.75 | 0.326 | -1.52 | 0.136 | -1.68 | 0.168 | -1.77 |
| 1430689_at   | 2810019C22Rik         | RIKEN cDNA 2810019C22 gene                                                             | -1.41 | 0.203 | -2.76 | 0.009 | -1.6  | 0.054 | -1.2  | 0.286 | -1.74 |
| 1456166_at   | ---                   | ---                                                                                    | -2.67 | 0.116 | -1.73 | 0.168 | -1.34 | 0.466 | -1.46 | 0.523 | -1.8  |
| 1422117_s_at | Khdrbs2               | KH domain containing, RNA binding, signal transduction associated 2                    | -2.28 | 0.22  | -1.22 | 0.729 | -2.26 | 0.043 | -1.27 | 0.604 | -1.76 |
| 1444780_at   | 5330421F07Rik         | RIKEN cDNA 5330421F07 gene                                                             | -5.33 | 0.004 | -1.17 | 0.602 | -1.52 | 0.031 | -1.13 | 0.635 | -2.29 |
| 1450989_at   | Tdgf1                 | teratocarcinoma-derived growth factor                                                  | -2.15 | 0.411 | -1.21 | 0.467 | -2.47 | 0.142 | -1.2  | 0.773 | -1.76 |
| 1434163_at   | AU024076              | expressed sequence AU024076                                                            | -1.82 | 0.364 | -2.81 | 0.323 | -1.26 | 0.408 | -1.68 | 0.095 | -1.89 |
| 1460502_at   | 2010007E15Rik         | RIKEN cDNA 2010007E15 gene                                                             | -1.57 | 0.513 | -2.86 | 0.141 | -1.4  | 0.293 | -1.49 | 0.454 | -1.83 |
| 1459606_at   | C79130                | expressed sequence C79130                                                              | -1.35 | 0.58  | -2.51 | 0.043 | -1.78 | 0.319 | -1.91 | 0.309 | -1.89 |
| 1426005_at   | Dmp1                  | dentin matrix protein 1                                                                | -2.16 | 0.331 | -1.18 | 0.807 | -2.57 | 0.214 | -1.01 | 0.992 | -1.73 |
| 1442955_at   | ---                   | ---                                                                                    | -1.35 | 0.579 | -2.76 | 0.126 | -1.67 | 0.291 | -1.11 | 0.848 | -1.72 |
| 1446487_at   | ---                   | ---                                                                                    | -3.98 | 0.289 | -1.17 | 0.819 | -1.67 | 0.276 | -1.03 | 0.936 | -1.96 |
| 1442563_at   | Tmem8                 | Transmembrane protein 8 (five membrane-spanning domains)                               | -2.49 | 0.283 | -1.46 | 0.527 | -1.62 | 0.383 | -1.1  | 0.836 | -1.67 |
| 1445177_at   | ---                   | 4 days neonate male adipose cDNA, RIKEN full-length enriched library, clone:B4         | -2.33 | 0.428 | -2.6  | 0.327 | -1.12 | 0.617 | -1.18 | 0.819 | -1.81 |
| 1445108_at   | Lphn3                 | Latrophilin 3                                                                          | -2.25 | 0.453 | -1.47 | 0.417 | -1.73 | 0.198 | -1.51 | 0.218 | -1.74 |
| 1444823_at   | ---                   | ---                                                                                    | -1.86 | 0.169 | -2.22 | 0.076 | -1.39 | 0.194 | -2    | 0.118 | -1.87 |
| 1456002_at   | Xpa                   | xeroderma pigmentosum, complementation group A                                         | -1.94 | 0.316 | -2.79 | 0.04  | -1.2  | 0.692 | -2.51 | 0.114 | -2.11 |
| 1458657_at   | Antrxr1               | Anthrax toxin receptor 1                                                               | -1.1  | 0.045 | -4.35 | 0.032 | -1.75 | 0.189 | -1.84 | 0.128 | -2.26 |
| 1436927_at   | Cypt4 /// Cypt9 /// C | cysteine-rich perinuclear theca 4 /// cysteine-rich perinuclear theca 9 /// cysteine-r | -2.31 | 0.097 | -2.79 | 0.024 | -1.09 | 0.863 | -1.38 | 0.46  | -1.89 |
| 1459826_at   | Kcnq2                 | Potassium voltage-gated channel, subfamily Q, member 2                                 | -2.77 | 0.314 | -1.5  | 0.025 | -1.47 | 0.09  | -1.58 | 0.594 | -1.83 |
| 1450871_a_at | Bcat1                 | branched chain aminotransferase 1, cytosolic                                           | -1.69 | 0.388 | -2.83 | 0.126 | -1.31 | 0.572 | -1.19 | 0.695 | -1.75 |
| 1422122_at   | Fcer2a                | Fc receptor, IgE, low affinity II, alpha polypeptide                                   | -3.01 | 0.138 | -1.42 | 0.678 | -1.49 | 0.31  | -3.51 | 0.07  | -2.36 |
| 1417923_at   | Pak3                  | p21 (CDKN1A)-activated kinase 3                                                        | -1.56 | 0.35  | -2.49 | 0.019 | -1.5  | 0.037 | -1.46 | 0.038 | -1.75 |
| 1444436_at   | Hsf2 /// 9630030115   | heat shock factor 2 /// RIKEN cDNA 9630030115 gene                                     | -1.65 | 0.094 | -1.76 | 0.025 | -1.86 | 0.005 | -1.2  | 0.453 | -1.62 |
| 1457507_at   | Nrg3                  | Neuregulin 3                                                                           | -1.34 | 0.713 | -2.5  | 0.142 | -1.77 | 0.512 | -1.78 | 0.372 | -1.85 |
| 1441875_at   | 1700063J08Rik         | RIKEN cDNA 1700063J08 gene                                                             | -1.77 | 0.442 | -1.86 | 0.483 | -1.65 | 0.221 | -1.48 | 0.523 | -1.69 |
| 1434728_at   | Gria3                 | glutamate receptor, ionotropic, AMPA3 (alpha 3)                                        | -1.32 | 0.255 | -2.61 | 0.037 | -1.75 | 0.074 | -1.2  | 0.338 | -1.72 |
| 1443927_at   | Ube1l2                | ubiquitin-activating enzyme E1-like 2                                                  | -1.17 | 0.771 | -2.39 | 0.237 | -2.29 | 0.215 | -2.57 | 0.036 | -2.1  |

|              |               |                                                                                |       |       |        |       |       |       |       |       |       |
|--------------|---------------|--------------------------------------------------------------------------------|-------|-------|--------|-------|-------|-------|-------|-------|-------|
| 1450795_at   | Lhb           | luteinizing hormone beta                                                       | -2.82 | 0.008 | -2.46  | 0.189 | -1.05 | 0.878 | -1.6  | 0.62  | -1.98 |
| 1451915_at   | Cct3          | chaperonin subunit 3 (gamma)                                                   | -4.08 | 0.005 | -1.65  | 0.424 | -1.16 | 0.772 | -1.02 | 0.973 | -1.98 |
| 1445288_at   | ---           | ---                                                                            | -2.13 | 0.161 | -1.22  | 0.662 | -2.38 | 0.144 | -1.91 | 0.085 | -1.91 |
| 1446882_at   | ---           | ---                                                                            | -1.61 | 0.493 | -2.04  | 0.01  | -1.66 | 0.349 | -3.29 | 0.034 | -2.15 |
| 1448062_at   | Stk11         | serine/threonine kinase 11                                                     | -3.13 | 0.024 | -1.6   | 0.498 | -1.3  | 0.5   | -1.62 | 0.424 | -1.91 |
| 1454054_at   | 4930459I23Rik | RIKEN cDNA 4930459I23 gene                                                     | -1.98 | 0.469 | -2.05  | 0.282 | -1.39 | 0.475 | -1.1  | 0.873 | -1.63 |
| 1442924_at   | C1stn2        | Calsyntenin 2                                                                  | -1.19 | 0.317 | -1.75  | 0.175 | -3.27 | 0.03  | -1.89 | 0.295 | -2.03 |
| 1457244_at   | D6Ert474e     | DNA segment, Chr 6, ERATO Doi 474, expressed                                   | -3.26 | 0.381 | -1.54  | 0.254 | -1.31 | 0.415 | -2.59 | 0.045 | -2.18 |
| 1453839_a_at | Pi16          | peptidase inhibitor 16                                                         | -1.91 | 0.367 | -3.41  | 0.05  | -1.11 | 0.702 | -1.38 | 0.615 | -1.95 |
| 1456629_at   | Ankrd47       | ankyrin repeat domain 47                                                       | -1.78 | 0.345 | -1.81  | 0.134 | -1.65 | 0.048 | -1.27 | 0.518 | -1.63 |
| 1445703_at   | Al848149      | expressed sequence Al848149                                                    | -3.46 | 0.098 | -1.19  | 0.776 | -1.69 | 0.335 | -1.47 | 0.392 | -1.95 |
| 1459012_at   | A730041O05Rik | RIKEN cDNA A730041O05 gene                                                     | -3.36 | 0.022 | -1.6   | 0.086 | -1.25 | 0.692 | -1.81 | 0.215 | -2    |
| 1457208_at   | Nfxl1         | nuclear transcription factor, X-box binding-like 1                             | -1.64 | 0.612 | -2.15  | 0.309 | -1.54 | 0.203 | -1.01 | 0.991 | -1.58 |
| 1442445_at   | 2610027H17Rik | RIKEN cDNA 2610027H17 gene                                                     | -1.17 | 0.654 | -2.15  | 0.066 | -2.46 | 0.026 | -1.13 | 0.592 | -1.73 |
| 1441732_at   | Tshz1         | Teashirt zinc finger family member 1                                           | -1.58 | 0.076 | -1.7   | 0.159 | -1.98 | 0.081 | -1.41 | 0.227 | -1.67 |
| 1432077_at   | Pot1          | protection of telomeres 1                                                      | -4.67 | 0.137 | -1.41  | 0.415 | -1.24 | 0.489 | -2.63 | 0.247 | -2.49 |
| 1446046_at   | BC023818      | CDNA sequence BC023818                                                         | -2    | 0.099 | -1.38  | 0.376 | -1.99 | 0.022 | -1.77 | 0.328 | -1.79 |
| 1457685_at   | D330034E10Rik | RIKEN cDNA D330034E10 gene                                                     | -1.24 | 0.801 | -1.96  | 0.085 | -2.44 | 0.003 | -1.21 | 0.727 | -1.71 |
| 1451308_at   | Elov4         | elongation of very long chain fatty acids (FEN1/Elo2, SUR4/Elo3, yeast)-like 4 | -2.79 | 0.009 | -1.25  | 0.707 | -1.74 | 0.093 | -2.02 | 0.263 | -1.95 |
| 1433474_at   | Edil3         | EGF-like repeats and discoidin I-like domains 3                                | -1.11 | 0.579 | -1.82  | 0.193 | -3.61 | 0.004 | -1.37 | 0.26  | -1.98 |
| 1433184_at   | 6720477C19Rik | RIKEN cDNA 6720477C19 gene                                                     | -1.29 | 0.222 | -1.47  | 0.425 | -3.66 | 0.062 | -1.13 | 0.158 | -1.88 |
| 1446729_at   | Disp2         | dispatched homolog 2 (Drosophila)                                              | -1.64 | 0.354 | -1.97  | 0.169 | -1.62 | 0.31  | -1.67 | 0.494 | -1.73 |
| 1438399_at   | Pex2          | peroxin 2                                                                      | -3.56 | 0.18  | -2.21  | 0.266 | -1    | 0.997 | -6.27 | 0.051 | -3.26 |
| 1459506_at   | ---           | ---                                                                            | -1.67 | 0.38  | -1.79  | 0.28  | -1.75 | 0.181 | -1.89 | 0.049 | -1.77 |
| 1419314_at   | Tinag         | tubulointerstitial nephritis antigen                                           | -1.18 | 0.11  | -2.9   | 0.067 | -1.85 | 0.002 | -1.3  | 0.646 | -1.81 |
| 1458713_at   | ---           | ---                                                                            | -1.82 | 0.019 | -1.47  | 0.481 | -1.98 | 0.115 | -1.31 | 0.313 | -1.65 |
| 1453907_at   | C030041B07Rik | RIKEN cDNA C030041B07 gene                                                     | -1.33 | 0.712 | -2.09  | 0.233 | -1.99 | 0.302 | -1.8  | 0.536 | -1.8  |
| 1457187_at   | A630071L07Rik | RIKEN cDNA A630071L07 gene                                                     | -2.3  | 0.223 | -1.61  | 0.481 | -1.47 | 0.267 | -1.37 | 0.567 | -1.69 |
| 1433279_at   | 5830440H09Rik | RIKEN cDNA 5830440H09 gene                                                     | -2.24 | 0.063 | -1.85  | 0.133 | -1.33 | 0.191 | -1.58 | 0.181 | -1.75 |
| 1446664_at   | D15Ert154e    | DNA segment, Chr 15, ERATO Doi 154, expressed                                  | -2.12 | 0.264 | -1.7   | 0.32  | -1.48 | 0.487 | -1.62 | 0.448 | -1.73 |
| 1415837_at   | Kik1          | kallikrein 1                                                                   | -1.36 | 0.036 | -10.34 | 0.111 | -1.1  | 0.643 | -1.79 | 0.121 | -3.65 |
| 1433404_at   | 4930423O20Rik | RIKEN cDNA 4930423O20 gene                                                     | -1.38 | 0.677 | -1.79  | 0.248 | -2.2  | 0.018 | -1.66 | 0.049 | -1.76 |
| 1420135_at   | BC021438      | CDNA sequence BC021438                                                         | -1.38 | 0.483 | -1.8   | 0.272 | -2.19 | 0.01  | -1.18 | 0.838 | -1.64 |
| 1444316_at   | ---           | ---                                                                            | -2.91 | 0.119 | -1.41  | 0.28  | -1.46 | 0.325 | -1.06 | 0.852 | -1.71 |
| 1445924_at   | LOC385211     | similar to RIKEN cDNA 1700029I01                                               | -1.57 | 0.1   | -2.44  | 0.018 | -1.44 | 0.523 | -1.76 | 0.464 | -1.8  |
| 1445749_at   | Rnf4          | Ring finger protein 4                                                          | -2.16 | 0.193 | -1.94  | 0.359 | -1.31 | 0.087 | -1.64 | 0.588 | -1.76 |
| 1423415_at   | Gpr83         | G protein-coupled receptor 83                                                  | -2    | 0.03  | -1.46  | 0.3   | -1.79 | 0.242 | -1.9  | 0.304 | -1.79 |
| 1459310_at   | 5330434G04Rik | RIKEN cDNA 5330434G04 gene                                                     | -1.17 | 0.569 | -2.91  | 0.333 | -1.83 | 0.158 | -1.37 | 0.752 | -1.82 |
| 1440724_at   | Al854703      | expressed sequence Al854703                                                    | -1.61 | 0.016 | -1.44  | 0.382 | -2.35 | 0.073 | -2.28 | 0.336 | -1.92 |
| 1442335_at   | ---           | Transcribed locus                                                              | -1.94 | 0.275 | -2.52  | 0.018 | -1.2  | 0.436 | -1.43 | 0.275 | -1.77 |
| 1432901_at   | BC026657      | cDNA sequence BC026657                                                         | -2.07 | 0.038 | -1.52  | 0.104 | -1.66 | 0.011 | -1.24 | 0.579 | -1.62 |
| 1451711_at   | Wnt9b         | wingless-type MMTV integration site 9B                                         | -4.76 | 0.03  | -1.87  | 0.187 | -1    | 0.999 | -1.13 | 0.712 | -2.19 |
| 1457012_at   | Dbx1          | developing brain homeobox 1                                                    | -2.63 | 0.269 | -2.24  | 0.053 | -1.09 | 0.836 | -1.42 | 0.387 | -1.85 |
| 1431910_at   | 5730460C07Rik | RIKEN cDNA 5730460C07 gene                                                     | -1.22 | 0.558 | -2.99  | 0.006 | -1.68 | 0.185 | -1.51 | 0.537 | -1.85 |
| 1441373_at   | Msi2          | Musashi homolog 2 (Drosophila)                                                 | -1.56 | 0.159 | -1.6   | 0.471 | -2.1  | 0.074 | -1.5  | 0.192 | -1.69 |
| 1444605_at   | 1700061F12Rik | RIKEN cDNA 1700061F12 gene                                                     | -1.27 | 0.779 | -1.98  | 0.514 | -2.19 | 0.055 | -2.4  | 0.224 | -1.96 |
| 1422365_at   | Olf17         | olfactory receptor 17                                                          | -3.21 | 0.004 | -1.03  | 0.965 | -2.17 | 0.013 | -1.18 | 0.801 | -1.9  |
| 1439299_at   | Spnb2         | Spectrin beta 2                                                                | -1.58 | 0.023 | -1.54  | 0.043 | -2.15 | 0.051 | -1.22 | 0.501 | -1.62 |
| 1447419_at   | ---           | Transcribed locus                                                              | -2.49 | 0.246 | -1.59  | 0.246 | -1.39 | 0.104 | -1.19 | 0.151 | -1.67 |
| 1425038_at   | Slc22a19      | solute carrier family 22 (organic anion transporter), member 19                | -1.1  | 0.611 | -2.96  | 0.447 | -2.01 | 0.296 | -1.08 | 0.834 | -1.79 |
| 1440780_x_at | 1500015O10Rik | RIKEN cDNA 1500015O10 gene                                                     | -2.07 | 0.086 | -1.86  | 0.093 | -1.37 | 0.205 | -1.57 | 0.294 | -1.72 |
| 1456926_at   | Rims4         | regulating synaptic membrane exocytosis 4                                      | -4.33 | 0.038 | -1.16  | 0.631 | -1.52 | 0.145 | -1.44 | 0.378 | -2.12 |
| 1459532_at   | Grm7          | glutamate receptor, metabotropic 7                                             | -1.2  | 0.851 | -2.37  | 0.214 | -2.02 | 0.269 | -1.99 | 0.484 | -1.9  |

|              |               |                                                                   |       |       |       |       |       |       |       |       |       |
|--------------|---------------|-------------------------------------------------------------------|-------|-------|-------|-------|-------|-------|-------|-------|-------|
| 1449735_at   | ---           | ---                                                               | -3.71 | 0.161 | -1.64 | 0.437 | -1.15 | 0.716 | -1.45 | 0.491 | -1.99 |
| 1429635_at   | Ccdc89        | coiled-coil domain containing 89                                  | -1.6  | 0.492 | -1.68 | 0.064 | -1.9  | 0.411 | -1.39 | 0.423 | -1.64 |
| 1443328_at   | 4921505C17Rik | RIKEN cDNA 4921505C17 gene                                        | -1.92 | 0.071 | -1.81 | 0.266 | -1.48 | 0.165 | -1.64 | 0.223 | -1.71 |
| 1421602_at   | Shbg          | sex hormone binding globulin                                      | -1.89 | 0.09  | -2.33 | 0.019 | -1.26 | 0.475 | -1.46 | 0.243 | -1.73 |
| 1451061_at   | 1700018B24Rik | RIKEN cDNA 1700018B24 gene                                        | -1.29 | 0.752 | -1.44 | 0.571 | -3.5  | 0.006 | -1.44 | 0.04  | -1.92 |
| 1430821_at   | 1700024C24Rik | RIKEN cDNA 1700024C24 gene                                        | -2.19 | 0.064 | -2.48 | 0.216 | -1.12 | 0.602 | -1.35 | 0.386 | -1.79 |
| 1440587_at   | ---           | ---                                                               | -1.41 | 0.038 | -1.77 | 0.135 | -2.08 | 0.019 | -1.96 | 0.162 | -1.8  |
| 1447161_at   | ---           | Transcribed locus                                                 | -2.22 | 0.365 | -1.33 | 0.55  | -1.8  | 0.138 | -2.75 | 0.186 | -2.03 |
| 1445562_at   | Zbtb16        | Zinc finger and BTB domain containing 16                          | -1.66 | 0.394 | -1.37 | 0.322 | -2.38 | 0.154 | -1.21 | 0.59  | -1.65 |
| 1440304_at   | Bach2         | BTB and CNC homology 2                                            | -1.46 | 0.106 | -1.59 | 0.173 | -2.27 | 0.027 | -3.23 | 0.045 | -2.14 |
| 1433262_at   | 9430052A13Rik | RIKEN cDNA 9430052A13 gene                                        | -1.95 | 0.106 | -1.54 | 0.367 | -1.68 | 0.137 | -1    | 0.991 | -1.54 |
| 1430649_at   | Baalc         | brain and acute leukemia, cytoplasmic                             | -2.01 | 0.21  | -2.81 | 0.043 | -1.1  | 0.797 | -1.36 | 0.675 | -1.82 |
| 1440678_at   | Ltbp1         | Latent transforming growth factor beta binding protein 1          | -1.77 | 0.023 | -1.81 | 0.079 | -1.56 | 0.169 | -1.1  | 0.842 | -1.56 |
| 1455233_at   | Mrps11        | mitochondrial ribosomal protein S11                               | -1.28 | 0.552 | -2.06 | 0.164 | -2.01 | 0.044 | -1.04 | 0.873 | -1.6  |
| 1455557_at   | LOC553095     | hypothetical LOC553095                                            | -1.66 | 0.002 | -2.13 | 0.345 | -1.45 | 0.577 | -1.16 | 0.825 | -1.6  |
| 1431044_at   | Thoc1         | THO complex 1                                                     | -1.42 | 0.733 | -2.14 | 0.205 | -1.69 | 0.128 | -1.15 | 0.57  | -1.6  |
| 1431901_a_at | Pfkfb2        | 6-phosphofructo-2-kinase/fructose-2,6-biphosphatase 2             | -4.26 | 0.147 | -1.44 | 0.647 | -1.2  | 0.683 | -1.55 | 0.188 | -2.11 |
| 1442789_at   | ---           | Transcribed locus                                                 | -1.58 | 0.157 | -1.49 | 0.143 | -2.17 | 0.068 | -1.6  | 0.431 | -1.71 |
| 1439823_at   | Ctbp2         | C-terminal binding protein 2                                      | -2.11 | 0.117 | -2.29 | 0.237 | -1.17 | 0.755 | -4.08 | 0.228 | -2.41 |
| 1458383_at   | Idh2          | Isocitrate dehydrogenase 2 (NADP+), mitochondrial                 | -1.61 | 0.347 | -1.3  | 0.617 | -2.69 | 0.022 | -1.07 | 0.864 | -1.67 |
| 1446885_at   | ---           | ---                                                               | -1.63 | 0.557 | -2.1  | 0.285 | -1.47 | 0.321 | -1.3  | 0.316 | -1.63 |
| 1431852_at   | Prdm8         | PR domain containing 8                                            | -2.5  | 0.153 | -2.19 | 0.12  | -1.1  | 0.859 | -1.32 | 0.605 | -1.78 |
| 1459395_at   | ---           | Transcribed locus                                                 | -1.21 | 0.537 | -1.88 | 0.064 | -2.43 | 0.172 | -1.3  | 0.29  | -1.7  |
| 1420263_at   | ---           | ---                                                               | -3.24 | 0.052 | -1.08 | 0.868 | -1.87 | 0.072 | -1.1  | 0.811 | -1.82 |
| 1443156_at   | ---           | ---                                                               | -1.29 | 0.579 | -1.57 | 0.147 | -2.8  | 0.005 | -1.72 | 0.02  | -1.84 |
| 1445819_at   | A830018L16Rik | RIKEN cDNA A830018L16 gene                                        | -3.07 | 0.013 | -1.9  | 0.023 | -1.09 | 0.561 | -1.55 | 0.098 | -1.9  |
| 1445664_at   | Igf1r         | Insulin-like growth factor I receptor                             | -1.35 | 0.224 | -1.36 | 0.716 | -3.35 | 0.052 | -1.07 | 0.626 | -1.78 |
| 1458883_at   | ---           | ---                                                               | -1.32 | 0.724 | -1.95 | 0.302 | -2    | 0.202 | -1.43 | 0.381 | -1.67 |
| 1459721_at   | ---           | CDNA clone IMAGE:6406267                                          | -1.79 | 0.228 | -1.69 | 0.372 | -1.6  | 0.488 | -1.94 | 0.609 | -1.76 |
| 1416643_at   | Tpt1          | tumor protein, translationally-controlled 1                       | -1.53 | 0.704 | -2.75 | 0.092 | -1.32 | 0.117 | -1.24 | 0.606 | -1.71 |
| 1442492_at   | DXErt11e      | DNA segment, Chr X, ERATO Doi 11, expressed                       | -3.23 | 0.061 | -1.16 | 0.704 | -1.66 | 0.106 | -1.14 | 0.574 | -1.8  |
| 1422014_at   | Foxp2         | forkhead box P2                                                   | -2    | 0.255 | -1.57 | 0.22  | -1.57 | 0.32  | -1    | 0.998 | -1.54 |
| 1459259_at   | A030007L22    | hypothetical protein A030007L22                                   | -1.76 | 0.263 | -2.66 | 0.079 | -1.21 | 0.44  | -1.58 | 0.244 | -1.8  |
| 1445533_at   | A630047E20Rik | RIKEN cDNA A630047E20 gene                                        | -2.78 | 0.061 | -1.89 | 0.303 | -1.13 | 0.76  | -3.44 | 0.025 | -2.31 |
| 1443112_at   | Api5          | apoptosis inhibitor 5                                             | -1.41 | 0.263 | -2.47 | 0.026 | -1.51 | 0.055 | -1.31 | 0.388 | -1.67 |
| 1445625_at   | ---           | Transcribed locus                                                 | -1.5  | 0.46  | -1.72 | 0.512 | -1.89 | 0.225 | -1.33 | 0.584 | -1.61 |
| 1437755_at   | Slc5a12       | solute carrier family 5 (sodium/glucose cotransporter), member 12 | -1.02 | 0.945 | -2.46 | 0.268 | -2.57 | 0.004 | -1.22 | 0.577 | -1.82 |
| 1420783_at   | Trpd52l3      | tumor protein D52-like 3                                          | -1.41 | 0.395 | -2.15 | 0.213 | -1.65 | 0.104 | -1.38 | 0.139 | -1.65 |
| 1416966_at   | Slc22a8       | solute carrier family 22 (organic anion transporter), member 8    | -1.29 | 0.253 | -2.59 | 0.126 | -1.62 | 0.293 | -1.68 | 0.194 | -1.79 |
| 1452318_a_at | Hspa1b        | heat shock protein 1B                                             | -1.45 | 0.164 | -1.62 | 0.192 | -2.12 | 0.188 | -2.19 | 0.534 | -1.84 |
| 1460264_at   | Lats1         | large tumor suppressor                                            | -2.01 | 0.036 | -1.35 | 0.693 | -1.84 | 0.113 | -2.6  | 0.066 | -1.95 |
| 1454877_at   | Sertad4       | SERTA domain containing 4                                         | -1.33 | 0.235 | -2.35 | 0.133 | -1.66 | 0.161 | -1.36 | 0.567 | -1.68 |
| 1426042_at   | Fgd4          | FYVE, RhoGEF and PH domain containing 4                           | -1.53 | 0.67  | -1.9  | 0.379 | -1.67 | 0.074 | -1.16 | 0.756 | -1.56 |
| 1436118_at   | Vangl2        | vang-like 2 (van gogh, Drosophila)                                | -1.28 | 0.111 | -2.78 | 0.06  | -1.57 | 0.044 | -1.55 | 0.153 | -1.79 |
| 1459507_at   | ---           | ---                                                               | -2.68 | 0.499 | -1.35 | 0.535 | -1.5  | 0.355 | -3.94 | 0.001 | -2.37 |
| 1420072_s_at | ---           | ---                                                               | -1.22 | 0.638 | -2.13 | 0.034 | -2.02 | 0.039 | -1.63 | 0.255 | -1.75 |
| 1454202_a_at | 1700061J05Rik | RIKEN cDNA 1700061J05 gene                                        | -1.62 | 0.449 | -1.47 | 0.528 | -2.04 | 0.096 | -1.2  | 0.543 | -1.58 |
| 1420627_a_at | Csn1s1        | casein alpha s1                                                   | -2.24 | 0.113 | -1.5  | 0.537 | -1.48 | 0.393 | -1.08 | 0.894 | -1.58 |
| 1447134_at   | Setd5         | SET domain containing 5                                           | -1.54 | 0.572 | -2.17 | 0.098 | -1.48 | 0.452 | -2.02 | 0.036 | -1.8  |
| 1443635_at   | Gm128         | gene model 128, (NCBI)                                            | -1.23 | 0.13  | -2.29 | 0.268 | -1.86 | 0.19  | -2.48 | 0.308 | -1.97 |
| 1433779_at   | Casc4         | cancer susceptibility candidate 4                                 | -1.12 | 0.301 | -2.24 | 0.03  | -2.24 | 0.016 | -1.23 | 0.359 | -1.71 |
| 1420299_at   | Gabra2        | gamma-aminobutyric acid (GABA-A) receptor, subunit alpha 2        | -1.46 | 0.652 | -2.89 | 0.003 | -1.32 | 0.608 | -1.29 | 0.392 | -1.74 |
| 1432643_at   | 4933411E06Rik | RIKEN cDNA 4933411E06 gene                                        | -1.24 | 0.593 | -2.01 | 0.183 | -2.05 | 0.108 | -1.22 | 0.721 | -1.63 |

|              |                     |                                                                                     |       |       |       |       |       |       |       |       |       |
|--------------|---------------------|-------------------------------------------------------------------------------------|-------|-------|-------|-------|-------|-------|-------|-------|-------|
| 1457446_at   | Opcml               | opioid binding protein/cell adhesion molecule-like                                  | -1.46 | 0.173 | -1.67 | 0.527 | -1.96 | 0.094 | -2.59 | 0.338 | -1.92 |
| 1458004_at   | Prrx1               | paired related homeobox 1                                                           | -1.52 | 0.021 | -2.58 | 0.269 | -1.34 | 0.528 | -1.1  | 0.476 | -1.63 |
| 1440276_at   | Gm62                | gene model 62, (NCBI)                                                               | -1.33 | 0.686 | -2.05 | 0.198 | -1.8  | 0.17  | -1.79 | 0.487 | -1.75 |
| 1459825_x_at | Igf2bp1             | insulin-like growth factor 2 mRNA binding protein 1                                 | -2.4  | 0.026 | -1.42 | 0.289 | -1.49 | 0.208 | -1.22 | 0.769 | -1.63 |
| 1440711_at   | C630001G18Rik       | RIKEN cDNA C630001G18 gene                                                          | -2.12 | 0.239 | -1.74 | 0.393 | -1.34 | 0.241 | -1.69 | 0.371 | -1.72 |
| 1440582_at   | Itch /// 8030492O04 | itchy /// RIKEN cDNA 8030492O04 gene                                                | -1.8  | 0.176 | -1.52 | 0.023 | -1.72 | 0.062 | -1.58 | 0.078 | -1.65 |
| 1442040_at   | 6330530A05Rik       | RIKEN cDNA 6330530A05 gene                                                          | -1.55 | 0.311 | -1.65 | 0.189 | -1.84 | 0.121 | -1.7  | 0.064 | -1.69 |
| 1446762_at   | ---                 | Transcribed locus                                                                   | -1.22 | 0.131 | -2.04 | 0.143 | -2.07 | 0.002 | -1.1  | 0.596 | -1.61 |
| 1427127_x_at | Hspa1b              | heat shock protein 1B                                                               | -1.4  | 0.308 | -1.75 | 0.075 | -1.96 | 0.242 | -2.15 | 0.51  | -1.82 |
| 1439480_at   | AU015850            | Expressed sequence AU015850                                                         | -1.91 | 0.244 | -1.34 | 0.594 | -1.89 | 0.372 | -2.45 | 0.157 | -1.9  |
| 1458934_at   | D5ErtD505e          | DNA segment, Chr 5, ERATO Doi 505, expressed                                        | -1.51 | 0.584 | -1.49 | 0.156 | -2.16 | 0.031 | -1.92 | 0.146 | -1.77 |
| 1421405_at   | Zim1                | zinc finger, imprinted 1                                                            | -1.42 | 0.288 | -1.35 | 0.56  | -2.85 | 0.097 | -1.04 | 0.942 | -1.67 |
| 1439086_at   | A930009L07Rik       | RIKEN cDNA A930009L07 gene                                                          | -1.16 | 0.512 | -4.37 | 0.088 | -1.42 | 0.214 | -1.53 | 0.596 | -2.12 |
| 1432330_at   | LOC381294           | complement factor H-like                                                            | -2.38 | 0.116 | -1.06 | 0.662 | -2.33 | 0.166 | -2.18 | 0.277 | -1.98 |
| 1421716_at   | V1rd6               | vomeroneasal 1 receptor, D6                                                         | -2.26 | 0.228 | -1.71 | 0.209 | -1.3  | 0.257 | -1.87 | 0.039 | -1.78 |
| 1432768_at   | 6430710M23Rik       | RIKEN cDNA 6430710M23 gene                                                          | -2.09 | 0.057 | -1.42 | 0.232 | -1.63 | 0.274 | -1.12 | 0.67  | -1.56 |
| 1429632_at   | Trappc4             | trafficking protein particle complex 4                                              | -2.26 | 0.049 | -1.47 | 0.231 | -1.48 | 0.077 | -1.18 | 0.585 | -1.6  |
| 1444044_at   | Nedd4               | Neural precursor cell expressed, developmentally down-regulted gene 4               | -2.33 | 0.02  | -1.36 | 0.581 | -1.57 | 0.167 | -1.28 | 0.725 | -1.64 |
| 1415832_at   | Agtr2               | angiotensin II receptor, type 2                                                     | -1.67 | 0.532 | -1.24 | 0.698 | -2.51 | 0.082 | -1.17 | 0.663 | -1.65 |
| 1455542_at   | C630043F03Rik       | RIKEN cDNA C630043F03 gene                                                          | -1.19 | 0.705 | -2.49 | 0.024 | -1.78 | 0.117 | -1.07 | 0.896 | -1.63 |
| 1447380_at   | Amdhd1              | amidohydrolase domain containing 1                                                  | -1.73 | 0.565 | -1.2  | 0.144 | -2.57 | 0.015 | -1.27 | 0.636 | -1.69 |
| 1456474_at   | ---                 | ---                                                                                 | -1.37 | 0.607 | -1.81 | 0.3   | -1.91 | 0.155 | -2.33 | 0.011 | -1.85 |
| 1425648_at   | Trim60 /// Trim61   | tripartite motif-containing 60 /// tripartite motif-containing 61                   | -2.25 | 0.126 | -1.38 | 0.44  | -1.57 | 0.183 | -1.2  | 0.826 | -1.6  |
| 1451774_at   | LOC435285           | similar to keratin associated protein 4-10; keratin associated protein 4.10         | -1.67 | 0.098 | -1.77 | 0.311 | -1.56 | 0.438 | -1.58 | 0.156 | -1.65 |
| 1425683_at   | ---                 | ---                                                                                 | -1.77 | 0.454 | -2.5  | 0.267 | -1.19 | 0.567 | -1.16 | 0.853 | -1.66 |
| 1428741_at   | Elavl4              | ELAV (embryonic lethal, abnormal vision, Drosophila)-like 4 (Hu antigen D)          | -1.27 | 0.741 | -2.25 | 0.305 | -1.73 | 0.244 | -1.11 | 0.799 | -1.59 |
| 1437558_at   | B130021B11Rik       | RIKEN cDNA B130021B11 gene                                                          | -1.12 | 0.084 | -2.45 | 0.029 | -1.96 | 0.027 | -1.98 | 0.028 | -1.88 |
| 1447458_at   | St3gal4             | ST3 beta-galactoside alpha-2,3-sialyltransferase 4                                  | -3.4  | 0.033 | -1.18 | 0.488 | -1.49 | 0.034 | -1.22 | 0.744 | -1.82 |
| 1439710_at   | Ncoa6ip             | nuclear receptor coactivator 6 interacting protein                                  | -1.3  | 0.414 | -2.72 | 0.006 | -1.49 | 0.112 | -1.31 | 0.387 | -1.7  |
| 1427293_a_at | Aut2                | autism susceptibility candidate 2                                                   | -1.79 | 0.048 | -1.49 | 0.592 | -1.73 | 0.294 | -1.53 | 0.608 | -1.63 |
| 1419779_at   | ---                 | ---                                                                                 | -1.39 | 0.436 | -1.35 | 0.442 | -2.85 | 0.006 | -1.31 | 0.618 | -1.72 |
| 1440910_at   | ---                 | CDNA clone IMAGE:5252333                                                            | -1.89 | 0.189 | -1.45 | 0.117 | -1.68 | 0.008 | -2.41 | 0.267 | -1.86 |
| 1433313_at   | 6720454L07Rik       | RIKEN cDNA 6720454L07 gene                                                          | -1.66 | 0.609 | -1.87 | 0.149 | -1.48 | 0.444 | -1.59 | 0.515 | -1.65 |
| 1439384_at   | Slc13a3             | solute carrier family 13 (sodium-dependent dicarboxylate transporter), member 3     | -1.28 | 0.764 | -3.89 | 0.026 | -1.29 | 0.467 | -1.47 | 0.594 | -1.98 |
| 1453883_at   | 4933425B07Rik       | RIKEN cDNA 4933425B07 gene                                                          | -1.41 | 0.607 | -1.6  | 0.64  | -2.1  | 0.104 | -1.22 | 0.571 | -1.58 |
| 1444959_at   | D1ErtD83e           | DNA segment, Chr 1, ERATO Doi 83, expressed                                         | -2.64 | 0.353 | -1.81 | 0.435 | -1.13 | 0.54  | -1.11 | 0.83  | -1.67 |
| 1446497_at   | Nav1                | Neuron navigator 1                                                                  | -1.2  | 0.556 | -1.65 | 0.223 | -2.68 | 0.011 | -1.25 | 0.479 | -1.7  |
| 1442814_at   | Glcc1               | Glucocorticoid induced transcript 1                                                 | -2.26 | 0.03  | -1.63 | 0.446 | -1.32 | 0.424 | -1.16 | 0.798 | -1.59 |
| 1449678_at   | ---                 | ---                                                                                 | -1.58 | 0.249 | -1.73 | 0.086 | -1.66 | 0.134 | -1.03 | 0.84  | -1.5  |
| 1419200_at   | Fxyd7               | FXFD domain-containing ion transport regulator 7                                    | -1.43 | 0.39  | -1.55 | 0.243 | -2.13 | 0.209 | -1.55 | 0.233 | -1.67 |
| 1437826_at   | Pfpl                | Pore forming protein-like                                                           | -1.32 | 0.489 | -2.14 | 0.163 | -1.7  | 0.338 | -1.64 | 0.417 | -1.7  |
| 1435307_at   | 6430502M16Rik       | RIKEN cDNA 6430502M16 gene                                                          | -1.24 | 0.225 | -1.71 | 0.389 | -2.38 | 0.223 | -1.37 | 0.506 | -1.67 |
| 1440069_at   | Efnb2               | Ephrin B2                                                                           | -1.46 | 0.419 | -1.69 | 0.428 | -1.86 | 0.003 | -1.57 | 0.572 | -1.64 |
| 1439522_at   | ---                 | ---                                                                                 | -1.6  | 0.08  | -2    | 0.089 | -1.45 | 0.253 | -3.16 | 0.063 | -2.05 |
| 1420771_at   | Spr2d               | small proline-rich protein 2D                                                       | -1.63 | 0.381 | -2.44 | 0.028 | -1.26 | 0.544 | -1.59 | 0.409 | -1.73 |
| 1442803_at   | Rad51l3             | RAD51-like 3 (S. cerevisiae)                                                        | -1.73 | 0.131 | -1.51 | 0.355 | -1.73 | 0.532 | -3.47 | 0.254 | -2.11 |
| 1436889_at   | Gabra1              | gamma-aminobutyric acid (GABA-A) receptor, subunit alpha 1                          | -3.83 | 0.015 | -1.19 | 0.745 | -1.4  | 0.202 | -1    | 0.995 | -1.85 |
| 1427421_at   | Tcp10b              | t-complex protein 10b                                                               | -1.88 | 0.242 | -1.59 | 0.353 | -1.52 | 0.514 | -1.67 | 0.397 | -1.67 |
| 1433924_at   | Peg3                | paternally expressed 3                                                              | -1.49 | 0.464 | -1.16 | 0.708 | -3.5  | 0.008 | -2.4  | 0.151 | -2.14 |
| 1454176_at   | Ercc8               | excision repairross-complementing rodent repair deficiency, complementation group 8 | -1.18 | 0.821 | -2.3  | 0.253 | -1.88 | 0.142 | -1.32 | 0.49  | -1.67 |
| 1431268_at   | 1700047117Rik       | RIKEN cDNA 1700047117 gene                                                          | -1.16 | 0.804 | -2.71 | 0.148 | -1.69 | 0.145 | -1.9  | 0.124 | -1.87 |
| 1460214_at   | Pcp4                | Purkinje cell protein 4                                                             | -1.21 | 0.304 | -2.01 | 0.353 | -2.03 | 0.1   | -2.23 | 0.194 | -1.87 |
| 1440644_at   | Parp6               | poly (ADP-ribose) polymerase family, member 6                                       | -1.44 | 0.474 | -1.77 | 0.169 | -1.79 | 0.049 | -1.87 | 0.004 | -1.72 |

|              |                    |                                                                                      |       |       |       |       |       |       |       |       |       |
|--------------|--------------------|--------------------------------------------------------------------------------------|-------|-------|-------|-------|-------|-------|-------|-------|-------|
| 1442516_at   | D2Ert623e          | DNA segment, Chr 2, ERATO Doi 623, expressed                                         | -1.56 | 0.285 | -1.46 | 0.505 | -2.04 | 0.197 | -1.22 | 0.699 | -1.57 |
| 1456988_at   | Al848258           | expressed sequence Al848258                                                          | -2.41 | 0.359 | -1.68 | 0.366 | -1.23 | 0.711 | -1.05 | 0.776 | -1.59 |
| 1447149_at   | ---                | ---                                                                                  | -3.66 | 0.026 | -1.53 | 0.14  | -1.12 | 0.482 | -1.06 | 0.764 | -1.84 |
| 1440064_at   | BC026657           | cDNA sequence BC026657                                                               | -4.41 | 0.102 | -1.08 | 0.846 | -1.5  | 0.254 | -1.31 | 0.087 | -2.07 |
| 1440258_at   | Kcnq2              | Potassium voltage-gated channel, subfamily Q, member 2                               | -2.25 | 0.052 | -1.25 | 0.678 | -1.73 | 0.152 | -1.08 | 0.931 | -1.58 |
| 1426077_at   | Moxd2              | monooxygenase, DBH-like 2                                                            | -1.2  | 0.555 | -1.34 | 0.675 | -4.13 | 0.038 | -1.7  | 0.563 | -2.09 |
| 1417356_at   | Peg3               | paternally expressed 3                                                               | -1.23 | 0.769 | -1.41 | 0.608 | -3.35 | 0.166 | -1.93 | 0.23  | -1.98 |
| 1447791_s_at | Gna14              | guanine nucleotide binding protein, alpha 14                                         | -1.54 | 0.108 | -1.65 | 0.179 | -1.77 | 0.002 | -1.06 | 0.664 | -1.5  |
| 1431459_at   | 9430013L14Rik      | RIKEN cDNA 9430013L14 gene                                                           | -1.13 | 0.865 | -1.62 | 0.244 | -3.14 | 0.111 | -2.06 | 0.044 | -1.99 |
| 1426070_a_at | Kcnd3              | potassium voltage-gated channel, Shal-related family, member 3                       | -1.32 | 0.29  | -5.42 | 0.028 | -1.13 | 0.815 | -1.26 | 0.762 | -2.28 |
| 1456946_at   | 4831416G18Rik      | RIKEN cDNA 4831416G18 gene                                                           | -1.74 | 0.071 | -1.61 | 0.125 | -1.59 | 0.143 | -1.09 | 0.643 | -1.51 |
| 1441537_at   | Recql5             | RecQ protein-like 5                                                                  | -2.13 | 0.044 | -1.26 | 0.526 | -1.77 | 0.147 | -1.05 | 0.935 | -1.55 |
| 1450820_a_at | Ntn2               | netrin G2                                                                            | -1.91 | 0.287 | -2.23 | 0.219 | -1.16 | 0.543 | -1.23 | 0.439 | -1.64 |
| 1432078_at   | 4930453L07Rik      | RIKEN cDNA 4930453L07 gene                                                           | -1.82 | 0.48  | -1.25 | 0.524 | -2.09 | 0.123 | -1.34 | 0.363 | -1.63 |
| 1445169_at   | ---                | ---                                                                                  | -2.56 | 0.031 | -1.26 | 0.677 | -1.54 | 0.041 | -1.1  | 0.616 | -1.62 |
| 1429856_at   | Tspan18            | tetraspanin 18                                                                       | -4.07 | 0.073 | -1.44 | 0.425 | -1.12 | 0.739 | -1.12 | 0.771 | -1.94 |
| 1459083_at   | A330084C13Rik      | RIKEN cDNA A330084C13 gene                                                           | -1.87 | 0.197 | -2.34 | 0.131 | -1.15 | 0.757 | -2.38 | 0.415 | -1.94 |
| 1458867_at   | Edil3              | EGF-like repeats and discoidin I-like domains 3                                      | -1.36 | 0.704 | -2.59 | 0.028 | -1.41 | 0.308 | -1.12 | 0.861 | -1.62 |
| 1456306_a_at | Umod               | uromodulin                                                                           | -1.18 | 0.001 | -9.02 | 0.127 | -1.14 | 0.568 | -3.46 | 0.193 | -3.7  |
| 1459051_at   | 6530418L21Rik      | RIKEN cDNA 6530418L21 gene                                                           | -1.69 | 0.21  | -2.71 | 0.035 | -1.15 | 0.8   | -1.24 | 0.149 | -1.7  |
| 1425182_x_at | Klk1b22 /// Klk1b9 | kallikrein 1-related peptidase b22 /// kallikrein 1-related peptidase b9             | -1.66 | 0.086 | -1.68 | 0.338 | -1.57 | 0.421 | -1.56 | 0.293 | -1.62 |
| 1433395_at   | 4921504P13Rik      | RIKEN cDNA 4921504P13 gene                                                           | -1.85 | 0.041 | -1.22 | 0.685 | -2.13 | 0.135 | -1.22 | 0.774 | -1.6  |
| 1425922_a_at | Mycn               | v-myc myelocytomatosis viral related oncogene, neuroblastoma derived (avian)         | -1.91 | 0.223 | -2.27 | 0.154 | -1.15 | 0.707 | -1.14 | 0.804 | -1.62 |
| 1428077_at   | Tmem163            | transmembrane protein 163                                                            | -3.4  | 0.007 | -1.68 | 0.261 | -1.06 | 0.823 | -1.12 | 0.623 | -1.81 |
| 1458805_at   | ---                | ---                                                                                  | -1.28 | 0.094 | -1.64 | 0.166 | -2.25 | 0.041 | -1.21 | 0.539 | -1.6  |
| 1459550_at   | Syn3               | Synapsin III                                                                         | -2.39 | 0.46  | -1.15 | 0.64  | -1.82 | 0.133 | -1.77 | 0.388 | -1.78 |
| 1421740_at   | Gnas               | GNAS (guanine nucleotide binding protein, alpha stimulating) complex locus           | -2.11 | 0.302 | -2.53 | 0.109 | -1.04 | 0.706 | -1.51 | 0.339 | -1.8  |
| 1439693_a_at | Fbxw16             | F-box and WD-40 domain protein 16                                                    | -1.89 | 0.191 | -1.61 | 0.211 | -1.46 | 0.443 | -1.29 | 0.238 | -1.56 |
| 1442695_at   | C030007I01Rik      | RIKEN cDNA C030007I01 gene                                                           | -1.33 | 0.449 | -1.69 | 0.187 | -2.03 | 0.053 | -2.29 | 0.012 | -1.84 |
| 1443915_at   | Mrpl47             | mitochondrial ribosomal protein L47                                                  | -1.45 | 0.15  | -2.14 | 0.085 | -1.47 | 0.275 | -1.09 | 0.853 | -1.54 |
| 1447098_at   | ---                | ---                                                                                  | -1.38 | 0.616 | -1.67 | 0.284 | -1.93 | 0.179 | -2.64 | 0.184 | -1.91 |
| 1439261_x_at | Mitd1              | MIT, microtubule interacting and transport, domain containing 1                      | -2.19 | 0.122 | -1.1  | 0.691 | -2.11 | 0.125 | -1.23 | 0.41  | -1.66 |
| 1445561_at   | Grip1              | Glutamate receptor interacting protein 1                                             | -1.57 | 0.355 | -1.32 | 0.03  | -2.25 | 0     | -1.51 | 0.023 | -1.66 |
| 1447844_at   | ---                | Transcribed locus                                                                    | -1.84 | 0.205 | -1.93 | 0.133 | -1.29 | 0.336 | -1.52 | 0.248 | -1.64 |
| 1442226_at   | 6430702L12         | hypothetical protein 6430702L12                                                      | -1.22 | 0.539 | -2.56 | 0.272 | -1.59 | 0.013 | -3.9  | 0.148 | -2.32 |
| 1457482_at   | Jarid1b            | jumonji, AT rich interactive domain 1B (Rbp2 like)                                   | -1.46 | 0.153 | -2.33 | 0.123 | -1.38 | 0.369 | -2.29 | 0.047 | -1.87 |
| 1422839_at   | Neurog2            | neurogenin 2                                                                         | -1.26 | 0.453 | -2.15 | 0.156 | -1.72 | 0.37  | -1.73 | 0.543 | -1.72 |
| 1458354_x_at | Krt28              | keratin 28                                                                           | -1.2  | 0.415 | -1.48 | 0.516 | -3    | 0.041 | -2.24 | 0.497 | -1.98 |
| 1442018_at   | Al426953           | expressed sequence Al426953                                                          | -1.27 | 0.605 | -2.42 | 0.091 | -1.57 | 0.184 | -2.84 | 0.219 | -2.02 |
| 1458087_at   | Stac3              | SH3 and cysteine rich domain 3                                                       | -1.46 | 0.183 | -1.82 | 0.29  | -1.65 | 0.422 | -1.71 | 0.557 | -1.66 |
| 1429523_a_at | Slc39a5            | solute carrier family 39 (metal ion transporter), member 5                           | -1.02 | 0.955 | -2.25 | 0.029 | -2.38 | 0.086 | -1.22 | 0.776 | -1.72 |
| 1455423_at   | Ndg1 /// LOC62318  | Nur77 downstream gene 1 /// similar to chromosome 6 open reading frame 148           | -2.19 | 0.437 | -1.12 | 0.732 | -2.01 | 0.434 | -1.6  | 0.466 | -1.73 |
| 1432252_a_at | 4933406K04Rik      | RIKEN cDNA 4933406K04 gene                                                           | -1.91 | 0.224 | -1.78 | 0.376 | -1.32 | 0.275 | -1.36 | 0.295 | -1.59 |
| 1457950_at   | Lphn3              | Latrophilin 3                                                                        | -2.4  | 0.223 | -1.09 | 0.815 | -1.97 | 0.277 | -1.53 | 0.516 | -1.75 |
| 1438918_at   | Fdft1 /// LOC62771 | farnesyl diphosphate farnesyl transferase 1 /// similar to farnesyl diphosphate farr | -2.33 | 0.245 | -1.04 | 0.92  | -2.2  | 0.203 | -1.4  | 0.246 | -1.74 |
| 1435214_at   | Gja12              | gap junction membrane channel protein alpha 12                                       | -1.6  | 0.596 | -4.52 | 0.027 | -1    | 0.998 | -1.12 | 0.827 | -2.06 |
| 1426990_at   | Cubn               | cubilin (intrinsic factor-cobalamin receptor)                                        | -1.03 | 0.708 | -4.84 | 0.108 | -1.51 | 0.386 | -1.03 | 0.971 | -2.1  |
| 1453459_at   | 1700028I16Rik      | RIKEN cDNA 1700028I16 gene                                                           | -1.42 | 0.588 | -1.64 | 0.292 | -1.88 | 0.194 | -1.4  | 0.52  | -1.58 |
| 1445653_at   | BC031361           | cDNA sequence BC031361                                                               | -1.61 | 0.484 | -2.13 | 0.17  | -1.32 | 0.131 | -1.35 | 0.284 | -1.6  |
| 1454049_at   | 4933426G20Rik      | RIKEN cDNA 4933426G20 gene                                                           | -1.28 | 0.237 | -1.68 | 0.312 | -2.14 | 0.4   | -2.08 | 0.179 | -1.79 |
| 1457543_at   | Nsun7              | NOL1/NOP2/Sun domain family, member 7                                                | -5.89 | 0.08  | -1.36 | 0.589 | -1.06 | 0.636 | -1.76 | 0.455 | -2.52 |
| 1419968_at   | C77370             | expressed sequence C77370                                                            | -2.77 | 0.267 | -1.98 | 0.148 | -1.02 | 0.941 | -1.42 | 0.582 | -1.8  |
| 1443510_at   | AW822216           | expressed sequence AW822216                                                          | -1.17 | 0.509 | -2.16 | 0.322 | -1.88 | 0.377 | -3.42 | 0.23  | -2.16 |

|              |               |                                                             |       |       |       |       |       |       |       |       |       |
|--------------|---------------|-------------------------------------------------------------|-------|-------|-------|-------|-------|-------|-------|-------|-------|
| 1444567_at   | 1700066J03Rik | RIKEN cDNA 1700066J03 gene                                  | -1.18 | 0.711 | -1.81 | 0.377 | -2.22 | 0.004 | -1.63 | 0.353 | -1.71 |
| 1431650_at   | 1110054P19Rik | RIKEN cDNA 1110054P19 gene                                  | -3.26 | 0.291 | -1.63 | 0.129 | -1.07 | 0.875 | -1.3  | 0.574 | -1.82 |
| 1447620_at   | Cno           | cappuccino                                                  | -1.22 | 0.381 | -2.64 | 0.232 | -1.53 | 0.185 | -1.96 | 0.389 | -1.84 |
| 1441441_at   | 2010007L08Rik | RIKEN cDNA 2010007L08 gene                                  | -1.79 | 0.002 | -1.39 | 0.494 | -1.74 | 0.012 | -1.2  | 0.493 | -1.53 |
| 1460265_at   | Pa2g4         | Proliferation-associated 2G4                                | -1.39 | 0.451 | -1.85 | 0.333 | -1.69 | 0.052 | -1.86 | 0.205 | -1.7  |
| 1421017_at   | Nrg3          | neuregulin 3                                                | -1.4  | 0.735 | -2.12 | 0.115 | -1.5  | 0.471 | -1.63 | 0.289 | -1.66 |
| 1436931_at   | Rfx4          | regulatory factor X, 4 (influences HLA class II expression) | -2.43 | 0.038 | -1.21 | 0.487 | -1.62 | 0.436 | -2.4  | 0.153 | -1.91 |
| 1429037_at   | 1700019A02Rik | RIKEN cDNA 1700019A02 gene                                  | -2.37 | 0.317 | -1.03 | 0.962 | -2.19 | 0.043 | -1.15 | 0.753 | -1.68 |
| 1432065_at   | 3100003L13Rik | RIKEN cDNA 3100003L13 gene                                  | -1.69 | 0.072 | -2.69 | 0.028 | -1.12 | 0.745 | -1.67 | 0.121 | -1.79 |
| 1419629_at   | Mesp2         | mesoderm posterior 2                                        | -3.45 | 0.134 | -1.19 | 0.838 | -1.38 | 0.031 | -1.66 | 0.256 | -1.92 |
| 1450547_x_at | Dub2          | deubiquitinating enzyme 2                                   | -2.72 | 0.227 | -1.13 | 0.86  | -1.66 | 0.321 | -1.74 | 0.273 | -1.81 |
| 1444023_at   | Ank2          | ankyrin 2, brain                                            | -1.86 | 0.149 | -1.61 | 0.178 | -1.43 | 0.188 | -1.19 | 0.759 | -1.52 |
| 1426338_a_at | Ntn1          | netrin G1                                                   | -1.15 | 0.791 | -2.7  | 0.023 | -1.62 | 0.277 | -1.24 | 0.429 | -1.68 |
| 1422481_at   | Krt1          | keratin 1                                                   | -1.47 | 0.423 | -2.75 | 0.107 | -1.23 | 0.669 | -1.28 | 0.201 | -1.68 |
| 1446849_at   | Auts2         | Autism susceptibility candidate 2                           | -1.16 | 0.727 | -2.04 | 0.123 | -1.98 | 0.048 | -1.24 | 0.218 | -1.61 |
| 1433082_at   | 4930448K20Rik | RIKEN cDNA 4930448K20 gene                                  | -2.09 | 0.346 | -2.04 | 0.285 | -1.13 | 0.809 | -1.41 | 0.427 | -1.66 |
| 1420273_x_at | ---           | ---                                                         | -1.39 | 0.449 | -1.56 | 0.289 | -2.01 | 0.177 | -1.26 | 0.517 | -1.55 |
| 1449447_at   | Cst10         | cystatin 10 (chondrocytes)                                  | -1.31 | 0.515 | -2.02 | 0.26  | -1.67 | 0.358 | -1.16 | 0.577 | -1.54 |
| 1457344_at   | Neto2         | neuropilin (NRP) and tolloid (TLL)-like 2                   | -1.34 | 0.624 | -2.69 | 0.118 | -1.35 | 0.627 | -1.29 | 0.642 | -1.67 |
| 1457786_at   | Siglech       | Sialic acid binding Ig-like lectin H                        | -1.29 | 0.581 | -1.62 | 0.263 | -2.13 | 0.06  | -1.15 | 0.695 | -1.55 |
| 1446892_at   | Lrrc16        | Leucine rich repeat containing 16                           | -1.15 | 0.718 | -2.24 | 0.16  | -1.83 | 0.012 | -3.47 | 0.044 | -2.17 |
| 1422236_at   | 4930560E09Rik | RIKEN cDNA 4930560E09 gene                                  | -1.75 | 0.553 | -1.41 | 0.365 | -1.72 | 0.16  | -1.45 | 0.451 | -1.58 |
| 1430286_s_at | Ppp1r14c      | protein phosphatase 1, regulatory (inhibitor) subunit 14c   | -1.39 | 0.069 | -1.35 | 0.228 | -2.49 | 0.003 | -1.01 | 0.985 | -1.56 |
| 1453888_at   | Cpne4         | copine IV                                                   | -1.23 | 0.693 | -1.79 | 0.164 | -2.03 | 0.223 | -1.2  | 0.764 | -1.56 |
| 1453698_at   | 6030451C04Rik | RIKEN cDNA 6030451C04 gene                                  | -1.03 | 0.943 | -1.64 | 0.229 | -3.6  | 0.004 | -1.54 | 0.002 | -1.95 |
| 1459774_at   | Tspan5        | Tetraspanin 5                                               | -1.28 | 0.256 | -1.62 | 0.479 | -2.17 | 0.057 | -2.03 | 0.173 | -1.77 |
| 1444754_at   | Asxl2         | additional sex combs like 2 (Drosophila)                    | -2.02 | 0.361 | -1.77 | 0.047 | -1.24 | 0.596 | -2.02 | 0.174 | -1.77 |
| 1431259_at   | ---           | ---                                                         | -2.23 | 0.135 | -1.8  | 0.346 | -1.16 | 0.564 | -1.24 | 0.507 | -1.61 |
| 1444846_at   | D15Ert529e    | DNA segment, Chr 15, ERATO Doi 529, expressed               | -2.94 | 0.162 | -1.33 | 0.731 | -1.29 | 0.459 | -1.14 | 0.786 | -1.68 |
| 1430478_at   | 3110043A19Rik | RIKEN cDNA 3110043A19 gene                                  | -1.57 | 0.148 | -2.07 | 0.143 | -1.34 | 0.367 | -1.13 | 0.836 | -1.53 |
| 1457844_a_at | 8430427H17Rik | RIKEN cDNA 8430427H17 gene                                  | -1.92 | 0.513 | -1.25 | 0.641 | -1.85 | 0.268 | -2.2  | 0.194 | -1.8  |
| 1459876_at   | Npr1          | Natriuretic peptide receptor 1                              | -1.4  | 0.08  | -1.6  | 0.145 | -1.9  | 0.063 | -1.3  | 0.145 | -1.55 |
| 1447428_at   | ---           | ---                                                         | -1.73 | 0.557 | -2.05 | 0.154 | -1.25 | 0.481 | -2.29 | 0.227 | -1.83 |
| 1443134_at   | A930005G22Rik | RIKEN cDNA A930005G22 gene                                  | -3.33 | 0.003 | -1.28 | 0.744 | -1.27 | 0.559 | -1.4  | 0.641 | -1.82 |
| 1425604_at   | Crkl          | v-crk sarcoma virus CT10 oncogene homolog (avian)-like      | -1.85 | 0.538 | -1.24 | 0.741 | -1.92 | 0.281 | -1    | 0.998 | -1.5  |
| 1432497_at   | Ccdc93        | coiled-coil domain containing 93                            | -1.3  | 0.723 | -2    | 0.389 | -1.67 | 0.298 | -1.09 | 0.422 | -1.52 |
| 1440935_at   | Grb10         | Growth factor receptor bound protein 10                     | -1.26 | 0.261 | -1.48 | 0.483 | -2.48 | 0.035 | -1.11 | 0.699 | -1.58 |
| 1421532_at   | Rxfp2         | relaxin/insulin-like family peptide receptor 2              | -1.22 | 0.527 | -1.99 | 0.092 | -1.82 | 0.018 | -1.6  | 0.305 | -1.66 |
| 1431685_at   | 4930549O18Rik | RIKEN cDNA 4930549O18 gene                                  | -1.75 | 0.136 | -2.13 | 0.345 | -1.21 | 0.785 | -1.3  | 0.333 | -1.6  |
| 1459191_at   | B130020M22Rik | RIKEN cDNA B130020M22 gene                                  | -1.6  | 0.506 | -2.51 | 0.254 | -1.18 | 0.765 | -1.65 | 0.224 | -1.73 |
| 1442576_at   | Creb5         | CAMP responsive element binding protein 5                   | -1.92 | 0.391 | -1.57 | 0.253 | -1.4  | 0.469 | -1.62 | 0.605 | -1.63 |
| 1456517_at   | Tmem44        | transmembrane protein 44                                    | -2.03 | 0.113 | -2.16 | 0.184 | -1.09 | 0.719 | -1.02 | 0.956 | -1.58 |
| 1456591_x_at | Akap3         | A kinase (PRKA) anchor protein 3                            | -1.49 | 0.698 | -1.92 | 0.367 | -1.47 | 0.409 | -1.21 | 0.76  | -1.52 |
| 1443154_at   | 6030438J01    | hypothetical protein 6030438J01                             | -1.92 | 0.042 | -1.61 | 0.349 | -1.37 | 0.115 | -1.42 | 0.184 | -1.58 |
| 1459000_at   | ---           | ---                                                         | -1.58 | 0.328 | -1.3  | 0.522 | -2.1  | 0.148 | -1.31 | 0.469 | -1.58 |
| 1443772_at   | ---           | ---                                                         | -1.39 | 0.472 | -3.24 | 0.206 | -1.18 | 0.079 | -2.6  | 0.048 | -2.1  |
| 1448608_at   | Dtprp         | decidual/trophoblast prolactin-related protein              | -2.6  | 0.063 | -1.15 | 0.623 | -1.61 | 0.036 | -1.02 | 0.939 | -1.59 |
| 1442262_at   | ---           | ---                                                         | -1.94 | 0.124 | -1.72 | 0.021 | -1.28 | 0.399 | -3.65 | 0.079 | -2.15 |
| 1439468_at   | Bach2         | BTB and CNC homology 2                                      | -1.64 | 0.029 | -1.31 | 0.287 | -1.98 | 0.048 | -2.26 | 0.122 | -1.8  |
| 1458742_at   | Lphn3         | latrophilin 3                                               | -1.27 | 0.777 | -2.96 | 0.051 | -1.33 | 0.297 | -1.69 | 0.405 | -1.81 |
| 1439044_at   | Zfp354c       | zinc finger protein 354C                                    | -1.15 | 0.491 | -2.1  | 0.043 | -1.87 | 0.064 | -2.02 | 0.216 | -1.79 |
| 1443228_at   | ---           | ---                                                         | -1.57 | 0.227 | -1.8  | 0.229 | -1.46 | 0.191 | -1.2  | 0.72  | -1.51 |
| 1440484_at   | Unc5d         | unc-5 homolog D (C. elegans)                                | -1.12 | 0.693 | -2.36 | 0.016 | -1.78 | 0.182 | -1.38 | 0.637 | -1.66 |

|              |                    |                                                                                       |       |       |       |       |       |       |       |       |       |
|--------------|--------------------|---------------------------------------------------------------------------------------|-------|-------|-------|-------|-------|-------|-------|-------|-------|
| 1458804_at   | Slco4c1            | Solute carrier organic anion transporter family, member 4C1                           | -4.56 | 0.025 | -1.03 | 0.962 | -1.46 | 0.493 | -1.54 | 0.489 | -2.14 |
| 1432854_at   | 1700018P08Rik      | RIKEN cDNA 1700018P08 gene                                                            | -1.36 | 0.281 | -1.61 | 0.154 | -1.92 | 0.378 | -1.06 | 0.819 | -1.49 |
| 1445318_at   | Kihl4              | Kelch-like 4 (Drosophila)                                                             | -1.22 | 0.84  | -2.05 | 0.034 | -1.75 | 0.329 | -1.57 | 0.074 | -1.65 |
| 1433192_at   | A430105P17Rik      | RIKEN cDNA A430105P17 gene                                                            | -1.44 | 0.296 | -3.53 | 0.043 | -1.11 | 0.704 | -1.35 | 0.557 | -1.86 |
| 1453218_at   | 1110014K05Rik      | RIKEN cDNA 1110014K05 gene                                                            | -1.55 | 0.091 | -2.25 | 0.233 | -1.26 | 0.35  | -1.68 | 0.026 | -1.69 |
| 1432878_at   | 4930544N03Rik      | RIKEN cDNA 4930544N03 gene                                                            | -1.76 | 0.216 | -2.31 | 0.232 | -1.14 | 0.494 | -3.67 | 0.033 | -2.22 |
| 1458238_at   | Arid5b             | AT rich interactive domain 5B (Mrf1 like)                                             | -1.77 | 0.086 | -2.5  | 0.075 | -1.09 | 0.729 | -1.32 | 0.373 | -1.67 |
| 1431475_a_at | Hoxa10             | homeo box A10                                                                         | -1.23 | 0.318 | -2.36 | 0.052 | -1.55 | 0.002 | -1.09 | 0.875 | -1.56 |
| 1421562_at   | Cd209c             | CD209c antigen                                                                        | -3.06 | 0.023 | -1.15 | 0.68  | -1.45 | 0.208 | -4.73 | 0     | -2.6  |
| 1457517_at   | A730046G19Rik      | RIKEN cDNA A730046G19 gene                                                            | -1.4  | 0.312 | -1.85 | 0.239 | -1.59 | 0.154 | -1.1  | 0.633 | -1.49 |
| 1431195_at   | Rnf170             | ring finger protein 170                                                               | -1.25 | 0.669 | -2    | 0.285 | -1.72 | 0.077 | -1.35 | 0.157 | -1.58 |
| 1459654_at   | ---                | ---                                                                                   | -1.06 | 0.535 | -1.92 | 0.069 | -2.41 | 0.152 | -1.9  | 0.062 | -1.82 |
| 1430460_at   | 5830410F13Rik      | RIKEN cDNA 5830410F13 gene                                                            | -1.45 | 0.201 | -1.97 | 0.034 | -1.45 | 0.003 | -1.52 | 0.151 | -1.6  |
| 1433416_at   | 5430432H19Rik      | RIKEN cDNA 5430432H19 gene                                                            | -1.26 | 0.711 | -2.2  | 0.148 | -1.57 | 0.415 | -1.16 | 0.79  | -1.55 |
| 1431376_at   | Wdr62              | WD repeat domain 62                                                                   | -1.64 | 0.609 | -1.83 | 0.246 | -1.37 | 0.422 | -1.84 | 0.288 | -1.67 |
| 1442541_at   | Oaz2               | Ornithine decarboxylase antizyme 2                                                    | -1.46 | 0.272 | -1.8  | 0.053 | -1.54 | 0.238 | -1.38 | 0.001 | -1.55 |
| 1443593_at   | ---                | ---                                                                                   | -1.79 | 0.189 | -1.12 | 0.834 | -2.29 | 0.067 | -1.35 | 0.632 | -1.64 |
| 1457898_at   | Ga17               | Dendritic cell protein GA17                                                           | -1.13 | 0.635 | -1.41 | 0.362 | -3.45 | 0.008 | -1.89 | 0.123 | -1.97 |
| 1456152_at   | Paqr5              | progesterone and adipoQ receptor family member V                                      | -1.02 | 0.744 | -1.82 | 0.203 | -2.81 | 0.092 | -2.13 | 0.008 | -1.94 |
| 1442992_at   | 130004C03          | hypothetical LOC403343                                                                | -1.3  | 0.199 | -1.58 | 0.026 | -2.05 | 0.094 | -1.68 | 0.058 | -1.65 |
| 1421919_a_at | Ccr9               | chemokine (C-C motif) receptor 9                                                      | -1.69 | 0.303 | -2.48 | 0.166 | -1.12 | 0.718 | -1.63 | 0.12  | -1.73 |
| 1437796_at   | ---                | Transcribed locus                                                                     | -1.58 | 0.006 | -1.21 | 0.584 | -2.33 | 0.055 | -1.74 | 0.087 | -1.71 |
| 1459055_at   | Foxj3              | forkhead box J3                                                                       | -2.59 | 0.167 | -1.16 | 0.763 | -1.56 | 0.248 | -1.29 | 0.563 | -1.65 |
| 1442373_at   | 2610203C20Rik      | RIKEN cDNA 2610203C20 gene                                                            | -1.5  | 0.43  | -1.19 | 0.734 | -2.63 | 0.023 | -1.17 | 0.769 | -1.62 |
| 1447743_x_at | Ext2               | exostoses (multiple) 2                                                                | -2.27 | 0.037 | -1.67 | 0.018 | -1.18 | 0.49  | -1.28 | 0.093 | -1.6  |
| 1447729_s_at | 1700036D21Rik      | RIKEN cDNA 1700036D21 gene                                                            | -1.84 | 0.208 | -1.75 | 0.344 | -1.29 | 0.246 | -1.56 | 0.028 | -1.61 |
| 1454360_at   | 4930418C01Rik      | RIKEN cDNA 4930418C01 gene                                                            | -1.09 | 0.749 | -2.15 | 0.171 | -1.95 | 0.391 | -2.06 | 0.028 | -1.81 |
| 1443456_at   | 6330416L07Rik      | RIKEN cDNA 6330416L07 gene                                                            | -1.45 | 0.082 | -1.62 | 0.055 | -1.72 | 0.081 | -1.08 | 0.683 | -1.46 |
| 1458872_at   | ---                | ---                                                                                   | -1.24 | 0.112 | -2.23 | 0.035 | -1.57 | 0.329 | -1.17 | 0.766 | -1.55 |
| 1423379_at   | Nfatc4 /// LOC6720 | nuclear factor of activated T-cells, cytoplasmic, calcineurin-dependent 4 /// similar | -1.6  | 0.096 | -1.97 | 0.056 | -1.31 | 0.245 | -1.63 | 0.54  | -1.63 |
| 1441369_at   | C030017B01Rik      | RIKEN cDNA C030017B01 gene                                                            | -2.47 | 0.447 | -1.08 | 0.878 | -1.78 | 0.274 | -1.07 | 0.721 | -1.6  |
| 1442667_at   | Cdc40              | cell division cycle 40 homolog (yeast)                                                | -1.45 | 0.696 | -1.24 | 0.559 | -2.52 | 0.032 | -1.28 | 0.544 | -1.62 |
| 1440624_at   | Ptprd              | Protein tyrosine phosphatase, receptor type, D                                        | -1.48 | 0.094 | -1.48 | 0.09  | -1.83 | 0.087 | -1.33 | 0.519 | -1.53 |
| 1420450_at   | Mmp10              | matrix metalloproteinase 10                                                           | -1.56 | 0.059 | -2.57 | 0.29  | -1.16 | 0.603 | -1.3  | 0.381 | -1.65 |
| 1422247_a_at | Uty                | ubiquitously transcribed tetratricopeptide repeat gene, Y chromosome                  | -1.2  | 0.698 | -4.13 | 0.033 | -1.22 | 0.682 | -1.4  | 0.395 | -1.99 |
| 1454691_at   | Nrxn1              | neurexin I                                                                            | -1.43 | 0.607 | -1.15 | 0.5   | -3.06 | 0.091 | -1.24 | 0.516 | -1.72 |
| 1423279_at   | Slc34a1            | solute carrier family 34 (sodium phosphate), member 1                                 | -1.23 | 0.16  | -4.31 | 0.153 | -1.18 | 0.622 | -1.11 | 0.764 | -1.96 |
| 1431407_at   | 2310024H09Rik      | RIKEN cDNA 2310024H09 gene                                                            | -1.94 | 0.424 | -1.19 | 0.696 | -1.85 | 0.222 | -1.23 | 0.709 | -1.55 |
| 1435460_at   | Prkg2              | protein kinase, cGMP-dependent, type II                                               | -1.46 | 0.033 | -1.88 | 0.156 | -1.47 | 0.077 | -1.46 | 0.425 | -1.57 |
| 1458901_at   | Mef2d              | Myocyte enhancer factor 2D                                                            | -1.46 | 0.005 | -3.15 | 0.014 | -1.12 | 0.591 | -1.21 | 0.371 | -1.73 |
| 1441718_at   | Edd1               | E3 ubiquitin protein ligase, HECT domain containing, 1                                | -1.37 | 0.202 | -1.42 | 0.072 | -2.15 | 0.01  | -1.22 | 0.121 | -1.54 |
| 1418726_a_at | Tnnt2              | troponin T2, cardiac                                                                  | -3.58 | 0.191 | -1.61 | 0.154 | -1    | 0.991 | -1.23 | 0.077 | -1.86 |
| 1449967_at   | Sim1               | single-minded homolog 1 (Drosophila)                                                  | -1.09 | 0.513 | -3.21 | 0.005 | -1.5  | 0.143 | -1.62 | 0.407 | -1.86 |
| 1454315_at   | 3300002A11Rik      | RIKEN cDNA 3300002A11 gene                                                            | -1.93 | 0.336 | -2.31 | 0.177 | -1.06 | 0.821 | -1.09 | 0.44  | -1.59 |
| 1441498_at   | Ptprd              | Protein tyrosine phosphatase, receptor type, D                                        | -1.29 | 0.312 | -1.74 | 0.069 | -1.82 | 0.052 | -1.19 | 0.593 | -1.51 |
| 1446967_at   | Fbxl7              | F-box and leucine-rich repeat protein 7                                               | -1.21 | 0.093 | -1.69 | 0.027 | -2.08 | 0.007 | -1.78 | 0.038 | -1.69 |
| 1440549_at   | B230334L07Rik      | RIKEN cDNA B230334L07 gene                                                            | -1.24 | 0.303 | -1.73 | 0.124 | -1.95 | 0.001 | -2.11 | 0.041 | -1.76 |
| 1454394_at   | 4932432N04Rik      | RIKEN cDNA 4932432N04 gene                                                            | -2.11 | 0.501 | -1.18 | 0.706 | -1.73 | 0.385 | -1.68 | 0.496 | -1.68 |
| 1458054_at   | Ext1               | Exostoses (multiple) 1                                                                | -1.35 | 0.457 | -1.68 | 0.121 | -1.76 | 0.046 | -1    | 0.985 | -1.45 |
| 1445682_at   | 2700099C18Rik      | RIKEN cDNA 2700099C18 gene                                                            | -2.14 | 0.253 | -1.36 | 0.194 | -1.43 | 0.446 | -1.24 | 0.304 | -1.54 |
| 1449963_at   | 2310040M23Rik      | RIKEN cDNA 2310040M23 gene                                                            | -2.1  | 0.16  | -1.22 | 0.782 | -1.65 | 0.338 | -2.23 | 0.543 | -1.8  |
| 1445791_at   | ---                | ---                                                                                   | -4.13 | 0.032 | -1.01 | 0.963 | -1.48 | 0.203 | -1.06 | 0.924 | -1.92 |
| 1456564_at   | C030046I01Rik      | RIKEN cDNA C030046I01 gene                                                            | -1.36 | 0.455 | -2.27 | 0.163 | -1.38 | 0.131 | -1.07 | 0.831 | -1.52 |

|              |               |                                                                                 |       |       |       |       |       |       |       |       |       |
|--------------|---------------|---------------------------------------------------------------------------------|-------|-------|-------|-------|-------|-------|-------|-------|-------|
| 1423037_at   | Agtr1l        | angiotensin receptor-like 1                                                     | -1.08 | 0.752 | -1.67 | 0.085 | -2.64 | 0.048 | -1.68 | 0.143 | -1.77 |
| 1441393_at   | ---           | ---                                                                             | -1.15 | 0.848 | -1.92 | 0.122 | -1.93 | 0.133 | -1.25 | 0.517 | -1.56 |
| 1438896_at   | Dnajc6        | DnaJ (Hsp40) homolog, subfamily C, member 6                                     | -1.29 | 0.49  | -2.72 | 0     | -1.31 | 0.585 | -1.08 | 0.8   | -1.6  |
| 1430646_at   | 5830407P18Rik | RIKEN cDNA 5830407P18 gene                                                      | -1.56 | 0.083 | -1.27 | 0.495 | -2.09 | 0.001 | -1.21 | 0.71  | -1.53 |
| 1445842_at   | ---           | ---                                                                             | -1.96 | 0.287 | -1.3  | 0.679 | -1.59 | 0.122 | -1.2  | 0.44  | -1.51 |
| 1439591_at   | Ulk2          | Unc-51 like kinase 2 (C. elegans)                                               | -1.18 | 0.025 | -2.08 | 0.08  | -1.73 | 0.049 | -1.32 | 0.101 | -1.58 |
| 1459344_at   | 9630019E01Rik | RIKEN cDNA 9630019E01 gene                                                      | -1.47 | 0.005 | -1.33 | 0.53  | -2.1  | 0.027 | -1.56 | 0.165 | -1.62 |
| 1443480_at   | ---           | ---                                                                             | -1.15 | 0.808 | -1.8  | 0.136 | -2.07 | 0.036 | -1.29 | 0.253 | -1.58 |
| 1444479_at   | ---           | ---                                                                             | -1.04 | 0.853 | -4.31 | 0.066 | -1.39 | 0.149 | -1.09 | 0.674 | -1.96 |
| 1445594_at   | Hnrpl         | Heterogeneous nuclear ribonucleoprotein L                                       | -1.9  | 0.212 | -1.14 | 0.847 | -1.98 | 0.029 | -1.16 | 0.791 | -1.55 |
| 1453214_at   | Lrrc15        | leucine rich repeat containing 15                                               | -1.74 | 0.504 | -1.39 | 0.48  | -1.63 | 0.436 | -1.11 | 0.849 | -1.47 |
| 1432485_at   | 3110057O12Rik | RIKEN cDNA 3110057O12 gene                                                      | -1.02 | 0.962 | -2.82 | 0.185 | -1.74 | 0.255 | -1.06 | 0.814 | -1.66 |
| 1425661_at   | Cdadc1        | cytidine and dCMP deaminase domain containing 1                                 | -1.32 | 0.228 | -1.14 | 0.816 | -3.65 | 0.01  | -1.42 | 0.659 | -1.88 |
| 1443284_at   | Satb1         | Special AT-rich sequence binding protein 1                                      | -1.17 | 0.552 | -1.44 | 0.281 | -2.77 | 0.073 | -4.26 | 0.04  | -2.41 |
| 1439321_at   | Arid1b        | AT rich interactive domain 1B (Swi1 like)                                       | -1.48 | 0.199 | -1.41 | 0.146 | -1.89 | 0.062 | -1.67 | 0.161 | -1.62 |
| 1441446_at   | ---           | ---                                                                             | -1.13 | 0.837 | -2.97 | 0.128 | -1.44 | 0.197 | -1.63 | 0.276 | -1.8  |
| 1431590_at   | 4930521C21Rik | RIKEN cDNA 4930521C21 gene                                                      | -1.77 | 0.117 | -1.99 | 0.269 | -1.18 | 0.068 | -1.26 | 0.26  | -1.55 |
| 1438697_at   | 4632425D07Rik | RIKEN cDNA 4632425D07 gene                                                      | -1.37 | 0.471 | -1.94 | 0.116 | -1.49 | 0.02  | -1.35 | 0.113 | -1.54 |
| 1440309_at   | 4833430A08Rik | RIKEN cDNA 4833430A08 gene                                                      | -1.87 | 0.135 | -1.13 | 0.727 | -2.01 | 0.006 | -1.5  | 0.051 | -1.63 |
| 1442107_at   | Flnb          | filamin, beta                                                                   | -1.4  | 0.211 | -1.48 | 0.109 | -1.89 | 0.155 | -1.21 | 0.507 | -1.5  |
| 1442854_at   | ---           | Transcribed locus                                                               | -2.12 | 0.081 | -2.11 | 0.408 | -1.03 | 0.961 | -1    | 0.995 | -1.57 |
| 1440097_at   | Mirg          | miRNA containing gene                                                           | -1.75 | 0.035 | -1.29 | 0.269 | -1.76 | 0.129 | -1.01 | 0.992 | -1.45 |
| 1431853_at   | 4933413C19Rik | RIKEN cDNA 4933413C19 gene                                                      | -3.02 | 0.274 | -1.26 | 0.377 | -1.27 | 0.526 | -1.56 | 0.509 | -1.78 |
| 1457922_at   | ---           | ---                                                                             | -2.31 | 0.502 | -1.03 | 0.967 | -1.96 | 0.218 | -1.12 | 0.79  | -1.6  |
| 1429932_at   | 4930566F21Rik | RIKEN cDNA 4930566F21 gene                                                      | -1.34 | 0.509 | -1.76 | 0.159 | -1.65 | 0.013 | -2.07 | 0.127 | -1.71 |
| 1460003_at   | AI956758      | expressed sequence AI956758                                                     | -1.17 | 0.435 | -1.9  | 0.238 | -1.87 | 0.067 | -1.03 | 0.922 | -1.49 |
| 1422275_at   | Gpr44         | G protein-coupled receptor 44                                                   | -1.78 | 0.469 | -1.35 | 0.174 | -1.63 | 0.465 | -1.76 | 0.324 | -1.63 |
| 1423555_a_at | Ifi44         | interferon-induced protein 44                                                   | -1.57 | 0.019 | -1.07 | 0.704 | -2.88 | 0.021 | -1.18 | 0.713 | -1.67 |
| 1432969_at   | 4933423K11Rik | RIKEN cDNA 4933423K11 gene                                                      | -1.67 | 0.572 | -1.24 | 0.284 | -1.94 | 0.038 | -1.38 | 0.282 | -1.56 |
| 1432660_at   | 5830420C07Rik | RIKEN cDNA 5830420C07 gene                                                      | -1.17 | 0.741 | -1.61 | 0.454 | -2.25 | 0.037 | -1.45 | 0.556 | -1.62 |
| 1432684_at   | 4921521C08Rik | RIKEN cDNA 4921521C08 gene                                                      | -1.37 | 0.566 | -1.2  | 0.722 | -2.84 | 0.119 | -2.21 | 0.493 | -1.9  |
| 1422281_at   | Sstr4         | somatostatin receptor 4                                                         | -1.22 | 0.741 | -2.44 | 0.085 | -1.44 | 0.437 | -1.38 | 0.578 | -1.62 |
| 1431756_at   | ---           | Adult male testis cDNA, RIKEN full-length enriched library, clone:4930516B21 pr | -2.05 | 0.446 | -1.81 | 0.451 | -1.14 | 0.788 | -1.52 | 0.474 | -1.63 |
| 1420555_at   | Alx3          | aristaless 3                                                                    | -2.67 | 0.39  | -1.09 | 0.694 | -1.59 | 0.451 | -1.44 | 0.641 | -1.7  |
| 1443204_at   | Rbms3         | RNA binding motif, single stranded interacting protein                          | -1.18 | 0.604 | -1.74 | 0.068 | -2    | 0.044 | -1.1  | 0.739 | -1.51 |
| 1442069_at   | D5Wsu178e     | DNA segment, Chr 5, Wayne State University 178, expressed                       | -1.4  | 0.735 | -2.56 | 0.004 | -1.22 | 0.731 | -1.17 | 0.419 | -1.59 |
| 1440963_at   | AI465270      | expressed sequence AI465270                                                     | -1.2  | 0.732 | -2.45 | 0.1   | -1.47 | 0.147 | -1.17 | 0.547 | -1.57 |
| 1422587_at   | Tmem45a       | transmembrane protein 45a                                                       | -1.03 | 0.896 | -2.14 | 0.038 | -2.05 | 0.006 | -2.6  | 0.521 | -1.96 |
| 1446210_at   | ---           | ---                                                                             | -1.8  | 0.574 | -1.42 | 0.072 | -1.51 | 0.063 | -1.2  | 0.477 | -1.48 |
| 1440119_at   | Sipa1l1       | signal-induced proliferation-associated 1 like 1                                | -1.16 | 0.602 | -3.87 | 0.099 | -1.25 | 0.38  | -1.27 | 0.415 | -1.89 |
| 1453785_at   | Taz           | tafazzin                                                                        | -1.53 | 0.454 | -1.62 | 0.32  | -1.54 | 0.056 | -2    | 0.555 | -1.67 |
| 1459118_at   | D230038C21    | hypothetical protein D230038C21                                                 | -1.5  | 0.36  | -1.91 | 0.147 | -1.36 | 0.188 | -1.1  | 0.495 | -1.47 |
| 1425987_a_at | Kcnma1        | potassium large conductance calcium-activated channel, subfamily M, alpha men   | -1.82 | 0.062 | -2.15 | 0.299 | -1.1  | 0.578 | -1.14 | 0.447 | -1.55 |
| 1458431_at   | Eif4g2        | eukaryotic translation initiation factor 4, gamma 2                             | -2.01 | 0.05  | -1.54 | 0.203 | -1.29 | 0.064 | -1.14 | 0.4   | -1.49 |
| 1446767_at   | Bcl9          | B-cell CLL/lymphoma 9                                                           | -1.36 | 0.643 | -1.93 | 0.085 | -1.5  | 0.477 | -1.91 | 0.147 | -1.67 |
| 1441869_x_at | Aut2          | Autism susceptibility candidate 2                                               | -1.34 | 0.07  | -1.52 | 0.106 | -1.92 | 0.08  | -1.5  | 0.286 | -1.57 |
| 1441744_at   | Cacna1c       | Calcium channel, voltage-dependent, L type, alpha 1C subunit                    | -1.71 | 0.354 | -1.22 | 0.647 | -1.92 | 0.078 | -1.45 | 0.524 | -1.57 |
| 1438398_at   | Rnpc2         | RNA-binding region (RNP1, RRM) containing 2                                     | -2.2  | 0.423 | -1.76 | 0.192 | -1.11 | 0.755 | -2.35 | 0.22  | -1.85 |
| 1454253_at   | 2810452K22Rik | RIKEN cDNA 2810452K22 gene                                                      | -2.29 | 0.249 | -1.74 | 0.054 | -1.09 | 0.671 | -1.28 | 0.522 | -1.6  |
| 1435848_at   | D430041D05Rik | RIKEN cDNA D430041D05 gene                                                      | -1.48 | 0.481 | -1.41 | 0.491 | -1.86 | 0.205 | -1.66 | 0.164 | -1.6  |
| 1457572_at   | Magi1         | Membrane associated guanylate kinase, WW and PDZ domain containing 1            | -2.45 | 0.222 | -1.19 | 0.089 | -1.48 | 0.234 | -1.27 | 0.741 | -1.6  |
| 1445706_x_at | ---           | ---                                                                             | -1.71 | 0.152 | -1.34 | 0.687 | -1.69 | 0.058 | -1.06 | 0.851 | -1.45 |
| 1441337_at   | ---           | Transcribed locus                                                               | -1.29 | 0.413 | -1.14 | 0.826 | -3.7  | 0.006 | -1.9  | 0.25  | -2.01 |

|              |               |                                                                               |       |       |       |       |       |       |       |       |       |
|--------------|---------------|-------------------------------------------------------------------------------|-------|-------|-------|-------|-------|-------|-------|-------|-------|
| 1433015_at   | 6330436F06Rik | RIKEN cDNA 6330436F06 gene                                                    | -1.17 | 0.343 | -1.58 | 0.222 | -2.27 | 0.033 | -1.11 | 0.818 | -1.53 |
| 1453905_at   | 5033415L01Rik | RIKEN cDNA 5033415L01 gene                                                    | -1.41 | 0.031 | -1.24 | 0.763 | -2.41 | 0.021 | -1.15 | 0.558 | -1.55 |
| 1445033_at   | Abca16        | ATP-binding cassette, sub-family A (ABC1), member 16                          | -1.25 | 0.388 | -1.84 | 0.454 | -1.71 | 0.129 | -1.02 | 0.893 | -1.46 |
| 1457203_at   | ---           | Transcribed locus                                                             | -1.39 | 0.678 | -1.79 | 0.174 | -1.54 | 0.088 | -1.27 | 0.768 | -1.5  |
| 1446007_at   | Bmp1          | Bone morphogenetic protein 1                                                  | -1.23 | 0.786 | -1.2  | 0.438 | -3.5  | 0.089 | -1.79 | 0.448 | -1.93 |
| 1444339_at   | ---           | 0 day neonate kidney cDNA, RIKEN full-length enriched library, clone:D630003P | -1.27 | 0.168 | -1.49 | 0.234 | -2.13 | 0.009 | -1.06 | 0.855 | -1.49 |
| 1452561_at   | Lphn3         | Latrophilin 3                                                                 | -1.42 | 0.338 | -1.19 | 0.791 | -2.59 | 0.042 | -1.87 | 0.156 | -1.77 |
| 1450289_at   | Foxd2         | forkhead box D2                                                               | -1.81 | 0.617 | -1.21 | 0.475 | -1.82 | 0.31  | -1.62 | 0.078 | -1.61 |
| 1430083_at   | 2610307P16Rik | RIKEN cDNA 2610307P16 gene                                                    | -1.77 | 0.503 | -1.44 | 0.492 | -1.49 | 0.001 | -1.18 | 0.789 | -1.47 |
| 1430616_at   | 4930528A17Rik | RIKEN cDNA 4930528A17 gene                                                    | -1.49 | 0.043 | -2.55 | 0.406 | -1.16 | 0.728 | -1.06 | 0.819 | -1.57 |
| 1459829_x_at | BC031781      | CDNA sequence BC031781                                                        | -1.74 | 0.209 | -1.49 | 0.135 | -1.46 | 0.116 | -1.19 | 0.504 | -1.47 |
| 1431670_at   | Ndufc2        | NADH dehydrogenase (ubiquinone) 1, subcomplex unknown, 2                      | -2.5  | 0.171 | -1.33 | 0.624 | -1.29 | 0.625 | -2.2  | 0.316 | -1.83 |
| 1440537_at   | Kcnv2         | potassium channel, subfamily V, member 2                                      | -3.01 | 0.003 | -1.27 | 0.393 | -1.24 | 0.386 | -1.55 | 0.019 | -1.77 |
| 1452730_at   | 1110033J19Rik | RIKEN cDNA 1110033J19 gene                                                    | -1.19 | 0.194 | -2.65 | 0.003 | -1.41 | 0.157 | -1.83 | 0.138 | -1.77 |
| 1447997_s_at | Timm8a2       | translocase of inner mitochondrial membrane 8 homolog a2 (yeast)              | -2.72 | 0.133 | -1.26 | 0.73  | -1.3  | 0.555 | -1.23 | 0.762 | -1.63 |
| 1436646_at   | ---           | Transcribed locus                                                             | -1.36 | 0.224 | -3.75 | 0.103 | -1.08 | 0.803 | -1.33 | 0.067 | -1.88 |
| 1433303_at   | 4930483C01Rik | RIKEN cDNA 4930483C01 gene                                                    | -1.63 | 0.634 | -3.05 | 0.253 | -1.01 | 0.975 | -1.15 | 0.643 | -1.71 |
| 1459595_at   | AA516738      | Expressed sequence AA516738                                                   | -1.31 | 0.142 | -1.5  | 0.364 | -2    | 0.041 | -1.77 | 0.046 | -1.64 |
| 1435201_at   | 0610009B10Rik | RIKEN cDNA 0610009B10 gene                                                    | -1.01 | 0.915 | -5.12 | 0.134 | -1.34 | 0.596 | -1.51 | 0.568 | -2.25 |
| 1436406_at   | A930007I19Rik | RIKEN cDNA A930007I19 gene                                                    | -2.11 | 0.249 | -1.3  | 0.042 | -1.46 | 0.298 | -1.37 | 0.34  | -1.56 |
| 1457334_at   | C130057M05Rik | RIKEN cDNA C130057M05 gene                                                    | -1.29 | 0.044 | -1.86 | 0.114 | -1.61 | 0.047 | -1.07 | 0.804 | -1.46 |
| 1441242_at   | Dpp4          | Dipeptidylpeptidase 4                                                         | -1.44 | 0.173 | -1.48 | 0.149 | -1.77 | 0.061 | -2.72 | 0.058 | -1.85 |
| 1420086_x_at | Fgf4          | fibroblast growth factor 4                                                    | -2.39 | 0.302 | -1.09 | 0.822 | -1.67 | 0.232 | -1.48 | 0.294 | -1.66 |
| 1442752_at   | Opcml         | Opioid binding protein/cell adhesion molecule-like                            | -1.56 | 0.283 | -2.09 | 0.259 | -1.23 | 0.753 | -1.06 | 0.886 | -1.49 |
| 1458743_at   | ---           | ---                                                                           | -1.02 | 0.97  | -1.67 | 0.39  | -2.86 | 0.128 | -1.48 | 0.571 | -1.75 |
| 1446187_at   | 4831416G18Rik | RIKEN cDNA 4831416G18 gene                                                    | -2.92 | 0.011 | -1.29 | 0.42  | -1.22 | 0.658 | -1.31 | 0.557 | -1.69 |
| 1440954_at   | Pbx1          | Pre B-cell leukemia transcription factor 1                                    | -1.43 | 0.107 | -1.26 | 0.157 | -2.26 | 0.001 | -1.12 | 0.524 | -1.52 |
| 1459689_at   | Gpd2          | Glycerol phosphate dehydrogenase 2, mitochondrial                             | -1.76 | 0.131 | -1.57 | 0.134 | -1.37 | 0.065 | -1.63 | 0.198 | -1.58 |
| 1437307_at   | Senp8         | SUMO/sentrin specific peptidase 8                                             | -1.15 | 0.205 | -2.71 | 0.396 | -1.43 | 0.161 | -1.19 | 0.305 | -1.62 |
| 1443151_at   | Synj2bp       | Synaptojanin 2 binding protein                                                | -1.41 | 0.027 | -1.51 | 0.075 | -1.77 | 0.027 | -1.72 | 0.122 | -1.6  |
| 1420195_at   | ---           | ---                                                                           | -1.66 | 0.316 | -1.94 | 0.138 | -1.22 | 0.541 | -1.11 | 0.556 | -1.48 |
| 1444185_at   | Stim2         | Stromal interaction molecule 2                                                | -1.28 | 0.121 | -1.68 | 0.16  | -1.79 | 0.009 | -1.63 | 0.132 | -1.6  |
| 1440643_at   | ---           | ---                                                                           | -1.18 | 0.418 | -2.22 | 0.344 | -1.57 | 0.157 | -1.32 | 0.502 | -1.57 |
| 1459157_at   | Stox2         | Storkhead box 2                                                               | -1.35 | 0.358 | -1.7  | 0.11  | -1.64 | 0.494 | -1.14 | 0.601 | -1.46 |
| 1441325_at   | Nkrf          | NF-kappaB repressing factor                                                   | -1.28 | 0.055 | -1.31 | 0.532 | -2.55 | 0.113 | -1.2  | 0.55  | -1.59 |
| 1444939_at   | ---           | ---                                                                           | -1.45 | 0.291 | -1.29 | 0.694 | -2.13 | 0.044 | -2.29 | 0.258 | -1.79 |
| 1443129_at   | ---           | ---                                                                           | -1.74 | 0.431 | -1.53 | 0.251 | -1.42 | 0.188 | -1.22 | 0.595 | -1.48 |
| 1454115_at   | 4930572J10Rik | RIKEN cDNA 4930572J10 gene                                                    | -1.13 | 0.816 | -1.93 | 0.319 | -1.87 | 0.081 | -1.45 | 0.321 | -1.6  |
| 1453143_at   | 4921509F24Rik | RIKEN cDNA 4921509F24 gene                                                    | -3.28 | 0.158 | -1.33 | 0.689 | -1.14 | 0.607 | -1.34 | 0.478 | -1.77 |
| 1436035_at   | 3830431G21Rik | RIKEN cDNA 3830431G21 gene                                                    | -1.28 | 0.047 | -1.91 | 0.268 | -1.59 | 0.02  | -1.29 | 0.637 | -1.52 |
| 1435775_at   | Clock         | circadian locomotor output cycles kaput                                       | -1.32 | 0.123 | -1.66 | 0.031 | -1.74 | 0.151 | -1.01 | 0.975 | -1.43 |
| 1429977_at   | 9030425L15Rik | RIKEN cDNA 9030425L15 gene                                                    | -1.28 | 0.124 | -1.25 | 0.363 | -2.81 | 0.007 | -1.23 | 0.492 | -1.64 |
| 1443302_at   | 6720403M19Rik | RIKEN cDNA 6720403M19 gene                                                    | -1.75 | 0.043 | -1.26 | 0.293 | -1.76 | 0.109 | -1.6  | 0.041 | -1.59 |
| 1444684_at   | 8030475D13Rik | RIKEN cDNA 8030475D13 gene                                                    | -1.36 | 0.498 | -1.67 | 0.16  | -1.66 | 0.461 | -1.24 | 0.603 | -1.48 |
| 1459809_x_at | 1700063D05Rik | RIKEN cDNA 1700063D05 gene                                                    | -1.76 | 0.454 | -1.05 | 0.888 | -2.38 | 0.1   | -1.37 | 0.664 | -1.64 |
| 1439681_at   | Farp2         | FERM, RhoGEF and pleckstrin domain protein 2                                  | -1.8  | 0.462 | -1.49 | 0.427 | -1.4  | 0.484 | -3.04 | 0.067 | -1.93 |
| 1433247_at   | C530007A02Rik | RIKEN cDNA C530007A02 gene                                                    | -1.51 | 0.647 | -2.03 | 0.164 | -1.28 | 0.689 | -1.28 | 0.768 | -1.52 |
| 1424798_a_at | Adam5         | a disintegrin and metallopeptidase domain 5                                   | -1.1  | 0.832 | -1.78 | 0.075 | -2.13 | 0.034 | -1.05 | 0.912 | -1.51 |
| 1446545_at   | Spnb2         | Spectrin beta 2                                                               | -1.57 | 0.331 | -1.36 | 0.213 | -1.75 | 0.181 | -1.06 | 0.92  | -1.44 |
| 1440023_at   | Pcdh12        | protocadherin 12                                                              | -1.36 | 0.524 | -1.44 | 0.158 | -1.97 | 0.327 | -1.37 | 0.528 | -1.53 |
| 1446947_at   | ---           | ---                                                                           | -1.57 | 0.431 | -1.23 | 0.676 | -2.03 | 0.085 | -1.18 | 0.801 | -1.5  |
| 1445893_at   | Plod1         | procollagen-lysine, 2-oxoglutarate 5-dioxygenase 1                            | -2.13 | 0.018 | -1.58 | 0.314 | -1.19 | 0.455 | -1.32 | 0.541 | -1.55 |
| 1433317_at   | 4930477O15Rik | RIKEN cDNA 4930477O15 gene                                                    | -3    | 0.002 | -1.35 | 0.553 | -1.16 | 0.738 | -1.07 | 0.935 | -1.64 |

|              |                   |                                                                                   |       |       |       |       |       |       |       |       |       |
|--------------|-------------------|-----------------------------------------------------------------------------------|-------|-------|-------|-------|-------|-------|-------|-------|-------|
| 1439640_at   | ---               | 16 days neonate thymus cDNA, RIKEN full-length enriched library, clone:A13004     | -1.58 | 0.099 | -1.46 | 0.223 | -1.6  | 0.145 | -1.19 | 0.508 | -1.46 |
| 1442180_at   | Dleu7             | deleted in lymphocytic leukemia, 7                                                | -1.32 | 0.288 | -2.04 | 0.073 | -1.44 | 0.281 | -1.46 | 0.137 | -1.57 |
| 1432744_at   | 4930443G03Rik     | RIKEN cDNA 4930443G03 gene                                                        | -4.41 | 0.379 | -1.38 | 0.569 | -1.01 | 0.977 | -1.94 | 0.36  | -2.18 |
| 1420701_at   | Klk1b1            | kallikrein 1-related peptidase b1                                                 | -1.5  | 0.644 | -1.48 | 0.119 | -1.66 | 0.152 | -1.11 | 0.531 | -1.44 |
| 1430243_at   | 1700058C01Rik     | RIKEN cDNA 1700058C01 gene                                                        | -1.71 | 0.145 | -1.54 | 0.351 | -1.41 | 0.525 | -1.36 | 0.591 | -1.5  |
| 1441562_at   | A230048O21Rik     | RIKEN cDNA A230048O21 gene                                                        | -1.23 | 0.151 | -2.3  | 0.193 | -1.44 | 0.469 | -1.26 | 0.61  | -1.56 |
| 1429894_a_at | Mtap7             | microtubule-associated protein 7                                                  | -1.14 | 0.73  | -2.98 | 0.213 | -1.37 | 0.471 | -1.23 | 0.749 | -1.68 |
| 1449428_at   | Cldn18            | claudin 18                                                                        | -2.65 | 0.165 | -1    | 0.992 | -1.76 | 0.065 | -1.82 | 0.442 | -1.81 |
| 1440107_at   | Smg7              | Smg-7 homolog, nonsense mediated mRNA decay factor (C. elegans)                   | -1.25 | 0.099 | -1.55 | 0.018 | -2.01 | 0.009 | -1.63 | 0.032 | -1.61 |
| 1430380_at   | Hemk2             | HemK methyltransferase family member 2                                            | -1.15 | 0.749 | -1.58 | 0.457 | -2.27 | 0.011 | -2.1  | 0.113 | -1.77 |
| 1447697_at   | Ccdc40            | Coiled-coil domain containing 40                                                  | -1.32 | 0.373 | -1.59 | 0.516 | -1.79 | 0.066 | -1.2  | 0.713 | -1.47 |
| 1439354_at   | LOC668373 /// LOC | region containing RIKEN cDNA 2310008H09 gene; RIKEN cDNA A230094G09 g             | -1.73 | 0.291 | -2.31 | 0.222 | -1.07 | 0.896 | -1.04 | 0.872 | -1.54 |
| 1440598_at   | Sntg1             | syntrophin, gamma 1                                                               | -1.1  | 0.769 | -1.73 | 0.538 | -2.19 | 0.269 | -1.63 | 0.329 | -1.66 |
| 1442829_at   | Rin2              | Ras and Rab interactor 2                                                          | -1.72 | 0.202 | -1.93 | 0.305 | -1.18 | 0.216 | -1.02 | 0.857 | -1.46 |
| 1442863_at   | Cacna2d4          | calcium channel, voltage-dependent, alpha 2/delta subunit 4                       | -1.71 | 0.505 | -1.42 | 0.361 | -1.53 | 0.396 | -1.23 | 0.725 | -1.47 |
| 1435730_at   | D930026N18Rik     | RIKEN cDNA D930026N18 gene                                                        | -1.94 | 0.028 | -1.19 | 0.431 | -1.7  | 0.134 | -1.41 | 0.362 | -1.56 |
| 1446223_at   | Cox10             | COX10 homolog, cytochrome c oxidase assembly protein, heme A: farnesyltransf      | -1.57 | 0.231 | -1.64 | 0.283 | -1.43 | 0.299 | -1.19 | 0.215 | -1.46 |
| 1419776_at   | ---               | ---                                                                               | -1.24 | 0.216 | -2.36 | 0.214 | -1.39 | 0.536 | -1.52 | 0.573 | -1.63 |
| 1433245_at   | 6720475M21Rik     | RIKEN cDNA 6720475M21 gene                                                        | -1.94 | 0.12  | -1.22 | 0.311 | -1.62 | 0.167 | -1.45 | 0.028 | -1.56 |
| 1441051_at   | Trim27            | tripartite motif protein 27                                                       | -2    | 0.163 | -1.6  | 0.153 | -1.22 | 0.26  | -1.32 | 0.221 | -1.53 |
| 1433092_at   | 3110062G12Rik     | RIKEN cDNA 3110062G12 gene                                                        | -3.11 | 0.095 | -1.17 | 0.79  | -1.29 | 0.722 | -1.39 | 0.522 | -1.74 |
| 1457366_at   | Cdc40             | cell division cycle 40 homolog (yeast)                                            | -1.58 | 0.204 | -1.44 | 0.07  | -1.61 | 0.005 | -1.43 | 0.139 | -1.51 |
| 1439943_at   | Vps54             | vacuolar protein sorting 54 (yeast)                                               | -1.29 | 0.446 | -1.82 | 0.248 | -1.6  | 0.008 | -1.61 | 0.062 | -1.58 |
| 1446221_at   | Ein               | Elastin                                                                           | -2.36 | 0.509 | -1.06 | 0.9   | -1.72 | 0.4   | -1.15 | 0.8   | -1.57 |
| 1439355_at   | Plekha5           | Pleckstrin homology domain containing, family A member 5                          | -1.61 | 0.031 | -1.2  | 0.092 | -2.01 | 0.009 | -1.08 | 0.699 | -1.48 |
| 1446335_at   | BC013481          | CDNA sequence BC013481                                                            | -1.86 | 0.089 | -1.61 | 0.207 | -1.26 | 0.081 | -1.04 | 0.558 | -1.44 |
| 1444810_at   | Acaca             | Acetyl-Coenzyme A carboxylase alpha                                               | -1.8  | 0.154 | -1.18 | 0.416 | -1.81 | 0     | -1.06 | 0.527 | -1.47 |
| 1450838_x_at | Rpl37 /// LOC3834 | ribosomal protein L37 /// similar to ribosomal protein L37                        | -1.49 | 0.191 | -1.98 | 0.026 | -1.29 | 0.063 | -1.07 | 0.699 | -1.46 |
| 1440306_at   | Nr3c2             | Nuclear receptor subfamily 3, group C, member 2                                   | -2.12 | 0.47  | -1.35 | 0.496 | -1.35 | 0.66  | -1.83 | 0.517 | -1.66 |
| 1444212_at   | Hip2              | Huntingtin interacting protein 2                                                  | -1.32 | 0.684 | -2.06 | 0.128 | -1.42 | 0.023 | -1.62 | 0.027 | -1.6  |
| 1441506_at   | Dcn               | decorin                                                                           | -1.83 | 0.197 | -1.26 | 0.179 | -1.64 | 0.294 | -1.08 | 0.875 | -1.45 |
| 1447139_at   | Bcl7c             | B-cell CLL/lymphoma 7C                                                            | -1.14 | 0.501 | -1.89 | 0.128 | -1.83 | 0.063 | -1.02 | 0.965 | -1.47 |
| 1430357_at   | H3f3b             | H3 histone, family 3B                                                             | -1.89 | 0.422 | -1.13 | 0.792 | -1.87 | 0.185 | -1.38 | 0.518 | -1.57 |
| 1432757_at   | 2900011L18Rik     | RIKEN cDNA 2900011L18 gene                                                        | -1.13 | 0.413 | -1.61 | 0.007 | -2.26 | 0.001 | -1.3  | 0.429 | -1.57 |
| 1457453_at   | 1700057G04Rik     | RIKEN cDNA 1700057G04 gene                                                        | -1.64 | 0.013 | -1.59 | 0.152 | -1.41 | 0.364 | -1.45 | 0.307 | -1.52 |
| 1446249_at   | Antrxr2           | Anthrax toxin receptor 2                                                          | -1.57 | 0.643 | -2.08 | 0.337 | -1.2  | 0.665 | -1.15 | 0.601 | -1.5  |
| 1460268_at   | ---               | ---                                                                               | -1.66 | 0.081 | -1.27 | 0.389 | -1.78 | 0.189 | -1.82 | 0.153 | -1.63 |
| 1459632_at   | Crim1             | Cysteine rich transmembrane BMP regulator 1 (chordin like)                        | -1.14 | 0.206 | -1.69 | 0.121 | -2.07 | 0.013 | -1.28 | 0.378 | -1.54 |
| 1454236_a_at | C030004A17Rik     | RIKEN cDNA C030004A17 gene                                                        | -1.48 | 0.214 | -1.47 | 0.07  | -1.67 | 0.019 | -1.73 | 0.145 | -1.59 |
| 1428349_s_at | Ebf3              | early B-cell factor 3                                                             | -3.66 | 0.001 | -1.3  | 0.635 | -1.1  | 0.843 | -1.85 | 0.457 | -1.98 |
| 1417607_at   | Cox6a2            | cytochrome c oxidase, subunit VI a, polypeptide 2                                 | -1.84 | 0.044 | -2.15 | 0.075 | -1.06 | 0.811 | -1.47 | 0.078 | -1.63 |
| 1419304_at   | T                 | brachyury                                                                         | -2.07 | 0.306 | -1.16 | 0.745 | -1.64 | 0.313 | -1.88 | 0.259 | -1.69 |
| 1453233_s_at | Calr3             | calreticulin 3                                                                    | -1.74 | 0.508 | -1.65 | 0.359 | -1.29 | 0.534 | -1.36 | 0.028 | -1.51 |
| 1455785_at   | ---               | Transcribed locus                                                                 | -2.55 | 0     | -1.34 | 0.479 | -1.23 | 0.538 | -1.61 | 0.276 | -1.68 |
| 1444135_at   | 6332401O19Rik     | RIKEN cDNA 6332401O19 gene                                                        | -1.27 | 0.261 | -1.24 | 0.53  | -2.77 | 0.135 | -1.5  | 0.361 | -1.69 |
| 1444313_at   | Dym               | Dymeclin                                                                          | -2.7  | 0.178 | -1.43 | 0.517 | -1.13 | 0.737 | -1.57 | 0.257 | -1.71 |
| 1423019_at   | Gja9              | gap junction membrane channel protein alpha 9                                     | -1.47 | 0.568 | -2.4  | 0.172 | -1.16 | 0.475 | -1.28 | 0.699 | -1.58 |
| 1418933_at   | Slc1a6            | solute carrier family 1 (high affinity aspartate/glutamate transporter), member 6 | -1.11 | 0.804 | -2.23 | 0.081 | -1.64 | 0.145 | -1.19 | 0.333 | -1.54 |
| 1459194_at   | 2210408I21Rik     | RIKEN cDNA 2210408I21 gene                                                        | -1.42 | 0.376 | -1.77 | 0.09  | -1.45 | 0.128 | -1.09 | 0.798 | -1.43 |
| 1437713_x_at | 1500010J02Rik     | RIKEN cDNA 1500010J02 gene                                                        | -1.45 | 0.592 | -2.34 | 0.117 | -1.19 | 0.676 | -1.54 | 0.364 | -1.63 |
| 1444869_at   | Gphn              | Gephyrin                                                                          | -1.47 | 0.135 | -1.56 | 0.054 | -1.58 | 0.057 | -1.04 | 0.837 | -1.41 |
| 1438585_at   | Syne2             | synaptic nuclear envelope 2                                                       | -1.32 | 0.562 | -2.59 | 0.192 | -1.23 | 0.611 | -1.17 | 0.626 | -1.58 |
| 1440702_at   | AU022297          | expressed sequence AU022297                                                       | -1.7  | 0.049 | -1.61 | 0.404 | -1.33 | 0.387 | -1.18 | 0.45  | -1.46 |

|              |               |                                                                   |       |       |       |       |       |       |       |       |       |
|--------------|---------------|-------------------------------------------------------------------|-------|-------|-------|-------|-------|-------|-------|-------|-------|
| 1439941_at   | ---           | ---                                                               | -1.11 | 0.859 | -1.5  | 0.561 | -2.54 | 0.016 | -1.01 | 0.987 | -1.54 |
| 1423859_a_at | Ptgds         | prostaglandin D2 synthase (brain)                                 | -1.36 | 0.397 | -3.35 | 0.056 | -1.08 | 0.744 | -1.23 | 0.283 | -1.76 |
| 1440485_at   | ---           | ---                                                               | -1.68 | 0.384 | -1.14 | 0.74  | -2.06 | 0.12  | -1.09 | 0.881 | -1.49 |
| 1443321_at   | Tmtc2         | Transmembrane and tetratricopeptide repeat containing 2           | -1.38 | 0.634 | -1.71 | 0.11  | -1.55 | 0.307 | -1.79 | 0.374 | -1.6  |
| 1433129_at   | 2900040J22Rik | RIKEN cDNA 2900040J22 gene                                        | -2.05 | 0.14  | -1.09 | 0.338 | -1.8  | 0.433 | -1.26 | 0.546 | -1.55 |
| 1459515_at   | 2610037D02Rik | RIKEN cDNA 2610037D02 gene                                        | -1.94 | 0.311 | -1.48 | 0.534 | -1.31 | 0.568 | -1.41 | 0.527 | -1.53 |
| 1447600_at   | Tspan5        | Tetraspanin 5                                                     | -1.27 | 0.362 | -1.59 | 0.228 | -1.85 | 0.144 | -1.35 | 0.175 | -1.51 |
| 1440290_at   | LOC434089     | hypothetical gene supported by AK039686                           | -1.24 | 0.66  | -1.72 | 0.472 | -1.74 | 0.369 | -1.47 | 0.607 | -1.55 |
| 1438114_x_at | Efs           | Embryonal Fyn-associated substrate                                | -1.86 | 0.314 | -1.92 | 0.29  | -1.11 | 0.263 | -1.04 | 0.844 | -1.48 |
| 1433845_x_at | Dusp9         | dual specificity phosphatase 9                                    | -1.21 | 0.66  | -1.69 | 0.421 | -1.84 | 0.088 | -1.92 | 0.118 | -1.67 |
| 1459708_at   | Ube4a         | Ubiquitination factor E4A, UFD2 homolog (S. cerevisiae)           | -3.02 | 0.204 | -1.58 | 0.224 | -1    | 0.957 | -1.52 | 0.453 | -1.78 |
| 1445080_at   | Wwc1          | WW, C2 and coiled-coil domain containing 1                        | -1.32 | 0.319 | -1.78 | 0.189 | -1.56 | 0.004 | -1.95 | 0.21  | -1.65 |
| 1458094_at   | Zfp407        | Zinc finger protein 407                                           | -3.5  | 0.035 | -1.01 | 0.962 | -1.47 | 0.14  | -1.16 | 0.259 | -1.78 |
| 1457994_at   | 4930563J15Rik | RIKEN cDNA 4930563J15 gene                                        | -1.41 | 0.086 | -1.44 | 0.25  | -1.8  | 0.119 | -2.66 | 0.47  | -1.83 |
| 1419642_at   | Purb          | purine rich element binding protein B                             | -1.6  | 0.282 | -1.42 | 0.175 | -1.59 | 0.213 | -1.45 | 0.249 | -1.51 |
| 1457022_at   | Dmd           | Dystrophin, muscular dystrophy                                    | -2.54 | 0.412 | -1.11 | 0.793 | -1.51 | 0.105 | -1.79 | 0.246 | -1.73 |
| 1423608_at   | Itm2a         | integral membrane protein 2A                                      | -1.69 | 0.037 | -1.1  | 0.747 | -2.17 | 0.004 | -2.99 | 0.046 | -1.99 |
| 1447991_at   | Pcsk2         | proprotein convertase subtilisin/kexin type 2                     | -2.05 | 0.508 | -1.6  | 0.31  | -1.18 | 0.811 | -3.01 | 0.471 | -1.96 |
| 1421524_at   | Cfc1          | cripto, FRL-1, cryptic family 1                                   | -3.84 | 0.118 | -1.24 | 0.666 | -1.11 | 0.515 | -1.2  | 0.585 | -1.85 |
| 1422518_at   | Cask          | calcium/calmodulin-dependent serine protein kinase (MAGUK family) | -1.26 | 0.506 | -1.59 | 0.046 | -1.85 | 0.01  | -1.14 | 0.598 | -1.46 |
| 1446184_at   | ---           | ---                                                               | -3.67 | 0.121 | -1.25 | 0.711 | -1.12 | 0.802 | -1.73 | 0.393 | -1.94 |
| 1430625_at   | Krtap3-2      | keratin associated protein 3-2                                    | -1.39 | 0.515 | -1.59 | 0.654 | -1.62 | 0.364 | -3.28 | 0.007 | -1.97 |
| 1440333_at   | Mamdc4        | MAM domain containing 4                                           | -1.19 | 0.049 | -1.87 | 0.052 | -1.69 | 0.089 | -1.5  | 0.163 | -1.56 |
| 1457794_at   | Whsc111       | Wolf-Hirschhorn syndrome candidate 1-like 1 (human)               | -1.5  | 0.104 | -1.39 | 0.42  | -1.73 | 0.005 | -1.12 | 0.571 | -1.44 |
| 1442422_at   | Tmem55a       | Transmembrane protein 55A                                         | -1.27 | 0.175 | -1.62 | 0.076 | -1.8  | 0.006 | -1.57 | 0.014 | -1.56 |
| 1443093_at   | Ajap1         | Adherens junction associated protein 1                            | -2    | 0.401 | -1.25 | 0.771 | -1.5  | 0.237 | -3.06 | 0.025 | -1.95 |
| 1430042_at   | A930012M21Rik | RIKEN cDNA A930012M21 gene                                        | -1.18 | 0.28  | -1.71 | 0.049 | -1.87 | 0.014 | -1.08 | 0.8   | -1.46 |
| 1446806_at   | ---           | ---                                                               | -1.48 | 0.023 | -3.4  | 0.293 | -1    | 0.966 | -1.44 | 0.284 | -1.83 |
| 1459196_at   | Dnmbp         | Dynamin binding protein                                           | -1.49 | 0.498 | -1.66 | 0.124 | -1.45 | 0.398 | -2.91 | 0.095 | -1.88 |
| 1446156_at   | Dmd           | Dystrophin, muscular dystrophy                                    | -2.02 | 0.322 | -1.71 | 0.315 | -1.13 | 0.477 | -2.72 | 0.034 | -1.9  |
| 1435933_at   | Scn2a1        | sodium channel, voltage-gated, type II, alpha 1                   | -1.08 | 0.929 | -1.78 | 0.36  | -2.09 | 0.021 | -1.27 | 0.671 | -1.56 |
| 1443027_at   | 4930523C07Rik | RIKEN cDNA 4930523C07 gene                                        | -1.36 | 0.49  | -1.48 | 0.034 | -1.79 | 0.019 | -2.08 | 0.028 | -1.68 |
| 1445395_at   | Prkca         | Protein kinase C, alpha                                           | -1.22 | 0.206 | -2    | 0.132 | -1.55 | 0.165 | -1.54 | 0.233 | -1.58 |
| 1442340_x_at | Cyr61         | cysteine rich protein 61                                          | -1.51 | 0.302 | -2.28 | 0.198 | -1.15 | 0.67  | -1.12 | 0.736 | -1.52 |
| 1445355_at   | Spata6        | spermatogenesis associated 6                                      | -2.05 | 0.061 | -1.14 | 0.766 | -1.65 | 0.279 | -2    | 0.356 | -1.71 |
| 1453124_at   | Tnpo3         | transportin 3                                                     | -2.14 | 0.453 | -1.62 | 0.3   | -1.14 | 0.831 | -2.7  | 0.202 | -1.9  |
| 1458113_at   | 9530019H20Rik | RIKEN cDNA 9530019H20 gene                                        | -1.23 | 0.749 | -1.73 | 0.238 | -1.74 | 0.003 | -1.35 | 0.494 | -1.51 |
| 1458020_at   | Reln          | Reelin                                                            | -1.87 | 0.271 | -1.91 | 0.087 | -1.1  | 0.732 | -2.92 | 0.221 | -1.95 |
| 1457105_at   | Pkd2l1        | polycystic kidney disease 2-like 1                                | -1.25 | 0.591 | -1.83 | 0.271 | -1.61 | 0.223 | -2.73 | 0.057 | -1.86 |
| 1434722_at   | Ampd1         | adenosine monophosphate deaminase 1 (isoform M)                   | -1.13 | 0.786 | -5.41 | 0.028 | -1.11 | 0.771 | -2.61 | 0.355 | -2.57 |
| 1420070_a_at | Slc9a5        | solute carrier family 9 (sodium/hydrogen exchanger), member 5     | -2.19 | 0.207 | -1.88 | 0.28  | -1.02 | 0.956 | -1.5  | 0.545 | -1.65 |
| 1445792_at   | Ppme1         | Protein phosphatase methylesterase 1                              | -1.74 | 0.59  | -1.03 | 0.958 | -2.34 | 0.114 | -1.41 | 0.633 | -1.63 |
| 1453798_at   | Ccdc93        | coiled-coil domain containing 93                                  | -1.06 | 0.844 | -2.81 | 0.326 | -1.49 | 0.532 | -1.62 | 0.37  | -1.74 |
| 1420248_at   | Tubg2         | tubulin, gamma 2                                                  | -1.28 | 0.363 | -1.84 | 0.251 | -1.55 | 0.208 | -1.25 | 0.375 | -1.48 |
| 1443235_at   | Eif2ak4       | Eukaryotic translation initiation factor 2 alpha kinase 4         | -1.77 | 0.196 | -1.55 | 0.138 | -1.32 | 0.117 | -1.49 | 0.226 | -1.53 |
| 1454482_at   | 5830474E16Rik | RIKEN cDNA 5830474E16 gene                                        | -1.33 | 0.729 | -2.26 | 0.241 | -1.29 | 0.58  | -3.19 | 0.215 | -2.02 |
| 1437798_at   | 6720422M22Rik | RIKEN cDNA 6720422M22 gene                                        | -1.17 | 0.465 | -1.34 | 0.086 | -2.7  | 0.04  | -1.14 | 0.469 | -1.59 |
| 1436683_at   | 1700011M02Rik | RIKEN cDNA 1700011M02 gene                                        | -1.99 | 0.304 | -1.22 | 0.692 | -1.54 | 0.242 | -1.19 | 0.837 | -1.49 |
| 1437934_at   | Tia1          | cytotoxic granule-associated RNA binding protein 1                | -1.47 | 0.04  | -1.68 | 0.075 | -1.43 | 0.014 | -1.34 | 0.261 | -1.48 |
| 1457505_at   | Utrn          | Utrophin                                                          | -1.38 | 0.587 | -1.22 | 0.718 | -2.32 | 0.013 | -1.22 | 0.505 | -1.54 |
| 1444622_at   | Ptprd         | Protein tyrosine phosphatase, receptor type, D                    | -1.3  | 0.224 | -2.08 | 0.021 | -1.39 | 0.121 | -4.71 | 0.023 | -2.37 |
| 1425836_a_at | Limk1         | LIM-domain containing, protein kinase                             | -1.73 | 0.603 | -1.67 | 0.173 | -1.26 | 0.646 | -3.29 | 0.254 | -1.99 |
| 1427470_s_at | Napb          | N-ethylmaleimide sensitive fusion protein attachment protein beta | -1.27 | 0.287 | -1.46 | 0.514 | -1.99 | 0.017 | -1.32 | 0.306 | -1.51 |

|              |                   |                                                                                  |       |       |       |       |       |       |       |       |       |
|--------------|-------------------|----------------------------------------------------------------------------------|-------|-------|-------|-------|-------|-------|-------|-------|-------|
| 1442785_at   | Smyd3             | SET and MYND domain containing 3                                                 | -1.6  | 0.259 | -1.27 | 0.19  | -1.78 | 0.245 | -2.87 | 0.025 | -1.88 |
| 1457823_at   | Cyr61             | cysteine rich protein 61                                                         | -1.68 | 0.133 | -2.17 | 0.138 | -1.09 | 0.794 | -1.18 | 0.722 | -1.53 |
| 1447362_at   | Bub1b             | budding uninhibited by benzimidazoles 1 homolog, beta (S. cerevisiae)            | -3.31 | 0.167 | -1.45 | 0.191 | -1.02 | 0.919 | -1.22 | 0.446 | -1.75 |
| 1424162_at   | Trim29            | tripartite motif protein 29                                                      | -2.54 | 0.035 | -1.51 | 0.256 | -1.09 | 0.669 | -1.98 | 0.22  | -1.78 |
| 1459397_at   | Arih1             | ariadne ubiquitin-conjugating enzyme E2 binding protein homolog 1 (Drosophila)   | -2.01 | 0.208 | -1.14 | 0.722 | -1.66 | 0.238 | -1.36 | 0.603 | -1.54 |
| 1439933_at   | B430316J06Rik     | RIKEN cDNA B430316J06 gene                                                       | -1.62 | 0.208 | -1.12 | 0.515 | -2.14 | 0.011 | -1.88 | 0.223 | -1.69 |
| 1439311_at   | B830012L14Rik     | RIKEN cDNA B830012L14 gene                                                       | -1.31 | 0.728 | -1.37 | 0.394 | -2.09 | 0.02  | -4.26 | 0.194 | -2.26 |
| 1439362_at   | ---               | Adult male urinary bladder cDNA, RIKEN full-length enriched library, clone:95300 | -1.11 | 0.646 | -2.75 | 0.062 | -1.41 | 0.438 | -1.27 | 0.518 | -1.63 |
| 1442388_at   | 2410137F16Rik     | RIKEN cDNA 2410137F16 gene                                                       | -1.63 | 0.455 | -2.26 | 0.171 | -1.08 | 0.829 | -1.51 | 0.555 | -1.62 |
| 1432962_at   | 2610024D14Rik     | RIKEN cDNA 2610024D14 gene                                                       | -1.59 | 0.348 | -1.62 | 0.152 | -1.37 | 0.239 | -1.21 | 0.499 | -1.45 |
| 1456910_at   | ---               | Transcribed locus                                                                | -1.17 | 0.78  | -2.88 | 0.115 | -1.29 | 0.414 | -1.45 | 0.61  | -1.7  |
| 1430642_at   | 2900001G08Rik     | RIKEN cDNA 2900001G08 gene                                                       | -1.48 | 0.072 | -1.62 | 0.35  | -1.46 | 0.291 | -1.96 | 0.331 | -1.63 |
| 1445460_at   | ---               | Transcribed locus                                                                | -1.56 | 0.332 | -1.86 | 0.127 | -1.25 | 0.416 | -1.12 | 0.378 | -1.45 |
| 1435833_at   | ---               | ---                                                                              | -2.43 | 0.448 | -1.74 | 0.313 | -1.01 | 0.988 | -1.49 | 0.507 | -1.67 |
| 1425409_at   | Chrna2            | cholinergic receptor, nicotinic, alpha polypeptide 2 (neuronal)                  | -1.13 | 0.072 | -3.15 | 0.238 | -1.29 | 0.194 | -1.5  | 0.126 | -1.77 |
| 1456188_at   | Svs2              | seminal vesicle protein, secretion 2                                             | -1.08 | 0.392 | -2.69 | 0.216 | -1.47 | 0.015 | -1.37 | 0.295 | -1.65 |
| 1435166_at   | Cntn2             | contactin 2                                                                      | -1.37 | 0.18  | -1.69 | 0.119 | -1.53 | 0.304 | -1.07 | 0.79  | -1.41 |
| 1429342_s_at | 2310021H06Rik     | RIKEN cDNA 2310021H06 gene                                                       | -1.45 | 0.451 | -1.8  | 0.33  | -1.37 | 0.185 | -4.05 | 0.003 | -2.17 |
| 1420800_a_at | Kcnq2             | potassium voltage-gated channel, subfamily Q, member 2                           | -2.74 | 0.073 | -1.21 | 0.584 | -1.27 | 0.563 | -1.35 | 0.182 | -1.64 |
| 1459588_at   | Kit               | Kit oncogene                                                                     | -1.22 | 0.234 | -1.89 | 0.412 | -1.59 | 0.23  | -1.05 | 0.756 | -1.44 |
| 1439566_at   | C030038J10Rik     | RIKEN cDNA C030038J10 gene                                                       | -1.02 | 0.963 | -2.18 | 0.108 | -1.86 | 0.328 | -1.23 | 0.568 | -1.57 |
| 1457870_at   | ---               | Transcribed locus                                                                | -1.1  | 0.822 | -2.76 | 0.106 | -1.41 | 0.519 | -1.23 | 0.292 | -1.63 |
| 1459412_at   | Mfhas1            | Malignant fibrous histiocytoma amplified sequence 1                              | -1.42 | 0.134 | -1.8  | 0.061 | -1.4  | 0.049 | -1.01 | 0.97  | -1.4  |
| 1458546_at   | D18Ert653e        | DNA segment, Chr 18, ERATO Doi 653, expressed                                    | -1.41 | 0.374 | -1.98 | 0.115 | -1.31 | 0.34  | -1.57 | 0.371 | -1.57 |
| 1432612_at   | 9030405F24Rik     | RIKEN cDNA 9030405F24 gene                                                       | -1.94 | 0.154 | -1.32 | 0.522 | -1.41 | 0.397 | -1.3  | 0.56  | -1.49 |
| 1444337_at   | Numb              | Numb gene homolog (Drosophila)                                                   | -1.4  | 0.227 | -1.42 | 0.092 | -1.77 | 0.015 | -1.2  | 0.334 | -1.45 |
| 1458588_at   | Schip1            | Schwannomin interacting protein 1                                                | -1.33 | 0.067 | -1.52 | 0.429 | -1.75 | 0.039 | -1.02 | 0.949 | -1.41 |
| 1460117_at   | ---               | ---                                                                              | -1.12 | 0.317 | -1.49 | 0.175 | -2.43 | 0.008 | -1.14 | 0.356 | -1.54 |
| 1431894_at   | 4833424O12Rik     | RIKEN cDNA 4833424O12 gene                                                       | -1.18 | 0.423 | -1.66 | 0.163 | -1.89 | 0.085 | -1.89 | 0.086 | -1.65 |
| 1421766_at   | Uchl4             | ubiquitin carboxyl-terminal esterase L4                                          | -1.17 | 0.797 | -1.28 | 0.301 | -2.91 | 0.18  | -1.62 | 0.464 | -1.74 |
| 1443536_at   | Slc7a11           | solute carrier family 7 (cationic amino acid transporter, y+ system), member 11  | -1.13 | 0.88  | -3.2  | 0.021 | -1.28 | 0.489 | -1.62 | 0.208 | -1.81 |
| 1447193_at   | ---               | ---                                                                              | -1.79 | 0.286 | -1.27 | 0.584 | -1.57 | 0.033 | -1.17 | 0.453 | -1.45 |
| 1446946_at   | Tgfb1             | Transforming growth factor, beta receptor I                                      | -1.1  | 0.679 | -1.56 | 0.167 | -2.3  | 0.022 | -1.28 | 0.136 | -1.56 |
| 1444070_at   | ---               | ---                                                                              | -1.28 | 0.51  | -1.57 | 0.229 | -1.78 | 0.188 | -1.49 | 0.394 | -1.53 |
| 1443588_at   | ---               | Transcribed locus                                                                | -1.31 | 0.391 | -1.36 | 0.369 | -2.07 | 0.065 | -1.8  | 0.331 | -1.64 |
| 1433411_at   | ---               | ---                                                                              | -1.6  | 0.216 | -1.13 | 0.791 | -2.12 | 0.221 | -1.31 | 0.786 | -1.54 |
| 1438464_at   | Arid4a            | AT rich interactive domain 4A (Rbp1 like)                                        | -1.68 | 0.352 | -1.22 | 0.559 | -1.76 | 0.199 | -1.3  | 0.083 | -1.49 |
| 1445024_at   | Stard7            | START domain containing 7                                                        | -1.66 | 0.027 | -1.44 | 0.388 | -1.46 | 0.041 | -1.44 | 0.368 | -1.5  |
| 1428991_at   | Hrasls            | HRAS-like suppressor                                                             | -1.23 | 0.392 | -2.38 | 0.05  | -1.33 | 0.296 | -1.3  | 0.523 | -1.56 |
| 1431981_at   | Hif1a             | hypoxia inducible factor 1, alpha subunit                                        | -1.53 | 0.339 | -1.78 | 0.463 | -1.3  | 0.438 | -1.05 | 0.843 | -1.41 |
| 1443607_at   | ---               | ---                                                                              | -1.76 | 0.487 | -2.13 | 0.348 | -1.06 | 0.865 | -1.06 | 0.873 | -1.5  |
| 1446484_at   | Mef2c             | Myocyte enhancer factor 2C                                                       | -1.44 | 0.176 | -1.86 | 0.205 | -1.33 | 0.399 | -2.34 | 0.085 | -1.74 |
| 1459947_at   | Bmp6              | Bone morphogenetic protein 6                                                     | -1.38 | 0.199 | -1.4  | 0.144 | -1.83 | 0.027 | -1.01 | 0.929 | -1.41 |
| 1459784_x_at | 1300002A08Rik     | RIKEN cDNA 1300002A08 gene                                                       | -1.68 | 0.042 | -2    | 0.011 | -1.12 | 0.74  | -2.11 | 0.058 | -1.73 |
| 1421094_at   | Zbtb33            | zinc finger and BTB domain containing 33                                         | -1.77 | 0.419 | -2.08 | 0.054 | -1.06 | 0.918 | -1.08 | 0.901 | -1.5  |
| 1459605_at   | Apba1             | amyloid beta (A4) precursor protein binding, family A, member 1                  | -1.19 | 0.851 | -2.27 | 0.165 | -1.42 | 0.299 | -1.03 | 0.955 | -1.48 |
| 1456400_at   | Terf2ip           | telomeric repeat binding factor 2, interacting protein                           | -2.36 | 0.473 | -1.01 | 0.982 | -1.75 | 0.402 | -4.67 | 0.209 | -2.45 |
| 1459442_at   | Gnb1              | Guanine nucleotide binding protein, beta 1                                       | -1.06 | 0.658 | -1.48 | 0.41  | -2.69 | 0.005 | -1.23 | 0.374 | -1.62 |
| 1445171_at   | 1700067C01Rik /// | RIKEN cDNA 1700067C01 gene ///                                                   | -1.22 | 0.615 | -1.46 | 0.501 | -2.07 | 0.127 | -1.52 | 0.31  | -1.57 |
| 1419215_at   | Aox4              | aldehyde oxidase 4                                                               | -1.28 | 0.621 | -1.68 | 0.387 | -1.63 | 0.455 | -1.1  | 0.846 | -1.42 |
| 1453236_at   | 1700054F22Rik     | RIKEN cDNA 1700054F22 gene                                                       | -2.06 | 0.485 | -1.47 | 0.431 | -1.22 | 0.635 | -2.58 | 0.317 | -1.83 |
| 1457169_at   | Ppp1r12b          | Protein phosphatase 1, regulatory (inhibitor) subunit 12B                        | -1.09 | 0.821 | -2.06 | 0.065 | -1.72 | 0.174 | -1.38 | 0.39  | -1.56 |
| 1443535_at   | Rabgap1           | RAB GTPase activating protein 1                                                  | -1.27 | 0.149 | -1.46 | 0.149 | -1.94 | 0.012 | -1.32 | 0.059 | -1.5  |

|              |                    |                                                                                    |       |       |       |       |       |       |       |       |       |
|--------------|--------------------|------------------------------------------------------------------------------------|-------|-------|-------|-------|-------|-------|-------|-------|-------|
| 1439056_at   | LOC636791          | hypothetical protein LOC636791                                                     | -1.61 | 0.628 | -2.42 | 0.115 | -1.05 | 0.818 | -1.09 | 0.822 | -1.54 |
| 1458029_at   | ---                | ---                                                                                | -1.19 | 0.679 | -3.59 | 0.006 | -1.15 | 0.806 | -2.08 | 0.316 | -2    |
| 1458003_at   | Zfp398             | zinc finger protein 398                                                            | -1.61 | 0.492 | -2.26 | 0.044 | -1.08 | 0.679 | -1.42 | 0.286 | -1.59 |
| 1450810_at   | Fshr               | follicle stimulating hormone receptor                                              | -1.92 | 0.207 | -1.21 | 0.657 | -1.56 | 0.157 | -1.16 | 0.756 | -1.46 |
| 1421745_at   | Plag1              | pleiomorphic adenoma gene 1                                                        | -1.1  | 0.823 | -3.94 | 0.037 | -1.21 | 0.74  | -1.11 | 0.768 | -1.84 |
| 1458093_at   | Mtrr               | 5-methyltetrahydrofolate-homocysteine methyltransferase reductase                  | -1.35 | 0.631 | -1.54 | 0.244 | -1.68 | 0.326 | -2.23 | 0.28  | -1.7  |
| 1450215_at   | Rcvrn              | recoverin                                                                          | -1.62 | 0.421 | -1.53 | 0.625 | -1.39 | 0.276 | -1.36 | 0.519 | -1.48 |
| 1444693_at   | Cacnb2             | Calcium channel, voltage-dependent, beta 2 subunit                                 | -1.37 | 0.276 | -1.13 | 0.762 | -2.71 | 0.004 | -1.05 | 0.82  | -1.56 |
| 1453626_at   | 3930402G23Rik      | RIKEN cDNA 3930402G23 gene                                                         | -4.04 | 0.001 | -1.3  | 0.233 | -1.03 | 0.871 | -1.22 | 0.478 | -1.9  |
| 1460060_at   | ---                | ---                                                                                | -1.64 | 0.288 | -1.31 | 0.657 | -1.63 | 0.326 | -1.68 | 0.378 | -1.56 |
| 1440848_at   | 1110028C15Rik      | RIKEN cDNA 1110028C15 gene                                                         | -1.34 | 0.519 | -1.54 | 0.298 | -1.69 | 0.031 | -1.48 | 0.038 | -1.51 |
| 1443961_at   | LOC627488 /// LOC  | similar to THO complex subunit 4 (Tho4) (RNA and export factor binding protein 1   | -1.34 | 0.462 | -1.57 | 0.2   | -1.65 | 0.145 | -1.1  | 0.798 | -1.42 |
| 1444381_at   | A830005F24Rik      | RIKEN cDNA A830005F24 gene                                                         | -2.2  | 0.171 | -1.02 | 0.97  | -1.81 | 0.128 | -1.48 | 0.198 | -1.63 |
| 1420155_at   | AA408954           | expressed sequence AA408954                                                        | -1.39 | 0.541 | -1.41 | 0.6   | -1.77 | 0.28  | -1.48 | 0.552 | -1.51 |
| 1457353_at   | Tomm70a            | Translocase of outer mitochondrial membrane 70 homolog A (yeast)                   | -1.63 | 0.242 | -1.48 | 0.271 | -1.42 | 0.536 | -1.69 | 0.07  | -1.56 |
| 1447296_at   | Fbxo27             | F-box protein 27                                                                   | -1.61 | 0.217 | -1.43 | 0.207 | -1.5  | 0.502 | -1.46 | 0.162 | -1.5  |
| 1427744_at   | Ccnb3              | cyclin B3                                                                          | -1.08 | 0.832 | -2.3  | 0.237 | -1.58 | 0.608 | -1.01 | 0.978 | -1.49 |
| 1457809_at   | Pcaf /// LOC330125 | p300/CBP-associated factor /// similar to p300/CBP-associated factor               | -1.57 | 0.064 | -1.28 | 0.296 | -1.75 | 0.011 | -1.62 | 0.011 | -1.55 |
| 1436408_at   | Rprml              | represso-like                                                                      | -1.67 | 0.211 | -1.41 | 0.715 | -1.46 | 0.039 | -1.07 | 0.918 | -1.4  |
| 1456979_at   | Zhx3               | Zinc fingers and homeoboxes 3                                                      | -1.24 | 0.246 | -1.58 | 0.016 | -1.8  | 0.032 | -1.3  | 0.16  | -1.48 |
| 1440528_at   | ---                | Transcribed locus                                                                  | -1.21 | 0.791 | -2.02 | 0.218 | -1.49 | 0.253 | -1.65 | 0.416 | -1.59 |
| 1432587_at   | 5730596P11Rik      | RIKEN cDNA 5730596P11 gene                                                         | -1.1  | 0.666 | -2.02 | 0.083 | -1.69 | 0.195 | -1.48 | 0.451 | -1.57 |
| 1421752_a_at | Serpib5            | serine (or cysteine) peptidase inhibitor, clade B, member 5                        | -1.39 | 0.741 | -2.01 | 0.29  | -1.29 | 0.343 | -1.09 | 0.751 | -1.44 |
| 1436267_a_at | Frap1              | FK506 binding protein 12-rapamycin associated protein 1                            | -1.3  | 0.308 | -1.68 | 0.046 | -1.58 | 0.099 | -1.13 | 0.649 | -1.42 |
| 1425920_at   | Cuedc1             | CUE domain containing 1                                                            | -1.45 | 0.254 | -2.78 | 0.063 | -1.06 | 0.732 | -1.18 | 0.373 | -1.62 |
| 1442447_at   | ---                | ---                                                                                | -1.26 | 0.135 | -1.84 | 0.119 | -1.52 | 0.19  | -1.05 | 0.302 | -1.42 |
| 1447705_at   | 4833432M17Rik      | RIKEN cDNA 4833432M17 gene                                                         | -2.22 | 0.056 | -1.44 | 0.015 | -1.18 | 0.666 | -1.56 | 0.158 | -1.6  |
| 1438470_at   | Socs2              | suppressor of cytokine signaling 2                                                 | -1.07 | 0.808 | -2.39 | 0.017 | -1.54 | 0.06  | -1.44 | 0.258 | -1.61 |
| 1458578_at   | Rbms1              | RNA binding motif, single stranded interacting protein 1                           | -1.31 | 0.242 | -1.26 | 0.313 | -2.26 | 0.009 | -1.31 | 0.021 | -1.53 |
| 1432971_at   | 4921518B13Rik      | RIKEN cDNA 4921518B13 gene                                                         | -2.03 | 0.117 | -1.27 | 0.614 | -1.4  | 0.092 | -1.02 | 0.922 | -1.43 |
| 1448459_at   | Kcnip1             | Kv channel-interacting protein 1                                                   | -1.57 | 0.518 | -2.67 | 0.026 | -1.01 | 0.967 | -4.31 | 0.029 | -2.39 |
| 1432118_at   | 2410012E07Rik      | RIKEN cDNA 2410012E07 gene                                                         | -1.13 | 0.724 | -2.98 | 0.049 | -1.29 | 0.36  | -1.11 | 0.461 | -1.63 |
| 1431148_at   | ---                | ---                                                                                | -1.85 | 0.121 | -1.47 | 0.114 | -1.28 | 0.637 | -1.15 | 0.759 | -1.44 |
| 1435354_at   | Kcnj15             | potassium inwardly-rectifying channel, subfamily J, member 15                      | -1.01 | 0.925 | -2.7  | 0.132 | -1.57 | 0.017 | -1.24 | 0.711 | -1.63 |
| 1425945_at   | 4933426I21Rik      | RIKEN cDNA 4933426I21 gene                                                         | -3.91 | 0.371 | -1.24 | 0.682 | -1.07 | 0.881 | -2    | 0.455 | -2.05 |
| 1441665_at   | Iars2              | isoleucine-tRNA synthetase 2, mitochondrial                                        | -1.82 | 0.153 | -1.08 | 0.906 | -1.92 | 0.106 | -1.07 | 0.905 | -1.47 |
| 1448097_at   | Ube3c              | Ubiquitin protein ligase E3C                                                       | -1    | 0.988 | -2.78 | 0.089 | -1.56 | 0.449 | -2.57 | 0.404 | -1.98 |
| 1419982_s_at | ---                | ---                                                                                | -1.89 | 0.097 | -1.77 | 0.179 | -1.1  | 0.501 | -1.85 | 0.269 | -1.65 |
| 1433091_at   | 6430514K02Rik      | RIKEN cDNA 6430514K02 gene                                                         | -1.39 | 0.413 | -1.84 | 0.171 | -1.36 | 0.577 | -1.01 | 0.972 | -1.4  |
| 1438186_at   | Pdlim5             | PDZ and LIM domain 5                                                               | -1.16 | 0.762 | -1.66 | 0.19  | -1.87 | 0.309 | -1.67 | 0.328 | -1.59 |
| 1421776_at   | Olfir74            | olfactory receptor 74                                                              | -1.29 | 0.606 | -1.46 | 0.405 | -1.86 | 0.356 | -1.17 | 0.782 | -1.44 |
| 1440599_at   | Olfir658           | olfactory receptor 658                                                             | -1.09 | 0.922 | -1.5  | 0.471 | -2.43 | 0.201 | -2.74 | 0.095 | -1.94 |
| 1437785_at   | Adamts9            | a disintegrin-like and metallopeptidase (reprolysin type) with thrombospondin type | -1.38 | 0.287 | -1.53 | 0.034 | -1.61 | 0.022 | -1.38 | 0.247 | -1.47 |
| 1448421_s_at | Aspn               | asporin                                                                            | -1.71 | 0.441 | -1.39 | 0.661 | -1.44 | 0.188 | -1.04 | 0.914 | -1.39 |
| 1432530_s_at | Boll               | bol, boule-like (Drosophila)                                                       | -1.75 | 0.211 | -1.1  | 0.886 | -1.92 | 0.04  | -1.14 | 0.777 | -1.48 |
| 1447765_at   | Wdr48              | WD repeat domain 48                                                                | -1.99 | 0.274 | -1.34 | 0.627 | -1.33 | 0.246 | -1.78 | 0.495 | -1.61 |
| 1445934_at   | Arih2 /// LOC43256 | ariadne homolog 2 (Drosophila) /// similar to ariadne homolog 2                    | -1.57 | 0.115 | -1.35 | 0.183 | -1.6  | 0.112 | -1.05 | 0.824 | -1.39 |
| 1447706_at   | ---                | ---                                                                                | -1.41 | 0.441 | -1.55 | 0.03  | -1.54 | 0.313 | -1.59 | 0.32  | -1.52 |
| 1445773_at   | Meis1              | Myeloid ecotropic viral integration site 1                                         | -1.12 | 0.836 | -1.5  | 0.123 | -2.26 | 0.01  | -1.19 | 0.17  | -1.52 |
| 1444500_at   | Ahsa1              | AHA1, activator of heat shock protein ATPase homolog 1 (yeast)                     | -1.66 | 0.018 | -1.73 | 0.033 | -1.22 | 0.188 | -1.12 | 0.582 | -1.43 |
| 1445807_at   | Prkg1              | Protein kinase, cGMP-dependent, type I                                             | -1.58 | 0.514 | -1.38 | 0.42  | -1.55 | 0.056 | -1.06 | 0.871 | -1.39 |
| 1454111_at   | 4930404A10Rik      | RIKEN cDNA 4930404A10 gene                                                         | -1.75 | 0.524 | -1.24 | 0.625 | -1.6  | 0.184 | -1.62 | 0.393 | -1.55 |
| 1447103_at   | Cdk5rap2           | CDK5 regulatory subunit associated protein 2                                       | -1.04 | 0.959 | -3.79 | 0.149 | -1.28 | 0.676 | -1.1  | 0.892 | -1.8  |

|              |               |                                                                                  |       |       |       |       |       |       |       |       |       |
|--------------|---------------|----------------------------------------------------------------------------------|-------|-------|-------|-------|-------|-------|-------|-------|-------|
| 1458346_x_at | Atp2b1        | ATPase, Ca+++ transporting, plasma membrane 1                                    | -1.58 | 0.242 | -1.23 | 0.357 | -1.8  | 0.177 | -2.45 | 0.09  | -1.76 |
| 1436474_at   | Mrc1          | mannose receptor-like precursor                                                  | -1.48 | 0.146 | -1.43 | 0.204 | -1.58 | 0.404 | -1.38 | 0.442 | -1.47 |
| 1427871_at   | Ptafr         | platelet-activating factor receptor                                              | -1.79 | 0.444 | -1.59 | 0.568 | -1.22 | 0.766 | -1.56 | 0.483 | -1.54 |
| 1440126_at   | BC037704      | cDNA sequence BC037704                                                           | -1.72 | 0.378 | -1.54 | 0.379 | -1.28 | 0.551 | -1.56 | 0.327 | -1.53 |
| 1417355_at   | Peg3          | paternally expressed 3                                                           | -1.25 | 0.558 | -1.22 | 0.512 | -2.58 | 0.006 | -2.35 | 0.126 | -1.85 |
| 1459644_at   | AU020772      | expressed sequence AU020772                                                      | -1.23 | 0.294 | -1.86 | 0.148 | -1.53 | 0.363 | -1.03 | 0.848 | -1.41 |
| 1437531_at   | Trpm1         | transient receptor potential cation channel, subfamily M, member 1               | -1.07 | 0.823 | -1.88 | 0.127 | -1.84 | 0.26  | -1.8  | 0.296 | -1.65 |
| 1436613_at   | Coro6         | Coronin, actin binding protein 6                                                 | -2.78 | 0.028 | -1.19 | 0.768 | -1.24 | 0.608 | -2.17 | 0.528 | -1.84 |
| 1437599_at   | Chchd3        | Coiled-coil-helix-coiled-coil-helix domain containing 3                          | -1.41 | 0.056 | -1.38 | 0.127 | -1.74 | 0.012 | -1.13 | 0.421 | -1.41 |
| 1450559_at   | 5730559C18Rik | RIKEN cDNA 5730559C18 gene                                                       | -1.72 | 0.107 | -1.46 | 0.432 | -1.35 | 0.405 | -3.22 | 0.105 | -1.94 |
| 1421319_at   | Ptgfrn        | prostaglandin F2 receptor negative regulator                                     | -2.28 | 0.108 | -1.72 | 0.108 | -1.01 | 0.958 | -1.72 | 0.147 | -1.68 |
| 1442399_at   | Xrn1          | 5'-3' exoribonuclease 1                                                          | -1.13 | 0.443 | -1.58 | 0.162 | -2.03 | 0.08  | -1.03 | 0.857 | -1.44 |
| 1445433_at   | Glt8d2        | glycosyltransferase 8 domain containing 2                                        | -3.48 | 0.085 | -1.06 | 0.919 | -1.29 | 0.268 | -1.07 | 0.925 | -1.72 |
| 1439310_at   | A630012P03Rik | RIKEN cDNA A630012P03 gene                                                       | -1.77 | 0.451 | -1.23 | 0.601 | -1.58 | 0.35  | -1.53 | 0.569 | -1.53 |
| 1431855_at   | 4930570E03Rik | RIKEN cDNA 4930570E03 gene                                                       | -1.14 | 0.825 | -1.91 | 0.125 | -1.63 | 0.273 | -1.14 | 0.646 | -1.46 |
| 1453012_at   | Tsc22d2       | TSC22 domain family 2                                                            | -1.43 | 0.403 | -1.47 | 0.284 | -1.59 | 0.049 | -1.14 | 0.414 | -1.41 |
| 1421190_at   | Gabrb3        | gamma-aminobutyric acid (GABA-A) receptor, subunit beta 3                        | -1.32 | 0.487 | -1.26 | 0.602 | -2.19 | 0.203 | -1.46 | 0.316 | -1.56 |
| 1435592_at   | Eif5b         | eukaryotic translation initiation factor 5B                                      | -1.48 | 0.127 | -1.29 | 0.44  | -1.79 | 0.068 | -1.17 | 0.516 | -1.43 |
| 1442491_at   | Dpp10         | Dipeptidylpeptidase 10                                                           | -1.66 | 0.232 | -1.74 | 0.166 | -1.2  | 0.681 | -2.59 | 0.074 | -1.8  |
| 1432293_at   | 4930579G18Rik | RIKEN cDNA 4930579G18 gene                                                       | -1.77 | 0.305 | -1.5  | 0.329 | -1.28 | 0.637 | -1.03 | 0.954 | -1.4  |
| 1433121_at   | 5830490A04Rik | RIKEN cDNA 5830490A04 gene                                                       | -1.16 | 0.745 | -1.71 | 0.462 | -1.76 | 0.258 | -1.33 | 0.691 | -1.49 |
| 1451801_at   | Trdn          | triadin                                                                          | -1.65 | 0.028 | -2.05 | 0.438 | -1.09 | 0.8   | -1.44 | 0.745 | -1.56 |
| 1440201_at   | Mapk10        | mitogen activated protein kinase 10                                              | -1.22 | 0.019 | -2.41 | 0.014 | -1.29 | 0.4   | -1.38 | 0.367 | -1.57 |
| 1448606_at   | Edg2          | endothelial differentiation, lysophosphatidic acid G-protein-coupled receptor, 2 | -1.36 | 0.257 | -1.64 | 0.013 | -1.5  | 0.109 | -1.47 | 0.174 | -1.49 |
| 1454370_at   | 4930557B21Rik | RIKEN cDNA 4930557B21 gene                                                       | -1.6  | 0.553 | -1.72 | 0.404 | -1.24 | 0.681 | -2.52 | 0.15  | -1.77 |
| 1436309_at   | Neto2         | neuropilin (NRP) and tolloid (TLL)-like 2                                        | -2.06 | 0.356 | -1.41 | 0.52  | -1.22 | 0.446 | -1.33 | 0.479 | -1.51 |
| 1446174_at   | LOC245440     | similar to melanoma antigen family A, 10                                         | -1.61 | 0.324 | -2.33 | 0.13  | -1.04 | 0.947 | -1.17 | 0.837 | -1.54 |
| 1458000_at   | Dsg1a         | desmoglein 1 alpha                                                               | -1.85 | 0.364 | -1.63 | 0.356 | -1.16 | 0.717 | -1.95 | 0.318 | -1.65 |
| 1445850_at   | 9530009M10Rik | RIKEN cDNA 9530009M10 gene                                                       | -1.31 | 0.481 | -1.23 | 0.559 | -2.27 | 0.015 | -1.33 | 0.292 | -1.54 |
| 1436138_at   | ---           | ---                                                                              | -1.48 | 0.182 | -1.47 | 0.233 | -1.52 | 0.117 | -1.22 | 0.557 | -1.42 |
| 1440116_at   | D630045J12Rik | RIKEN cDNA D630045J12 gene                                                       | -1.13 | 0.203 | -2.62 | 0.221 | -1.34 | 0.338 | -1.2  | 0.685 | -1.57 |
| 1445966_at   | Igf2r         | Insulin-like growth factor 2 receptor                                            | -1.29 | 0.105 | -1.26 | 0.417 | -2.25 | 0     | -1.07 | 0.638 | -1.47 |
| 1444857_at   | C87312        | expressed sequence C87312                                                        | -1.03 | 0.751 | -1.45 | 0.549 | -2.87 | 0.133 | -1.54 | 0.374 | -1.72 |
| 1425476_at   | Col4a5        | procollagen, type IV, alpha 5                                                    | -1.37 | 0.163 | -1.96 | 0.044 | -1.29 | 0.353 | -1.18 | 0.479 | -1.45 |
| 1446025_at   | AI462493      | Expressed sequence AI462493                                                      | -2.3  | 0.197 | -1.12 | 0.758 | -1.45 | 0.277 | -1.04 | 0.91  | -1.48 |
| 1432938_at   | 5430439C14Rik | RIKEN cDNA 5430439C14 gene                                                       | -2.35 | 0.479 | -1.03 | 0.966 | -1.61 | 0.299 | -4.79 | 0.153 | -2.45 |
| 1457410_at   | Arhgap5       | Rho GTPase activating protein 5                                                  | -1.41 | 0.005 | -1.32 | 0.429 | -1.83 | 0.016 | -1.74 | 0.007 | -1.57 |
| 1441874_x_at | Prlpe         | prolactin-like protein E                                                         | -5.5  | 0.004 | -1.12 | 0.78  | -1.06 | 0.895 | -1.8  | 0.453 | -2.37 |
| 1432582_at   | 3110054G05Rik | RIKEN cDNA 3110054G05 gene                                                       | -1.15 | 0.759 | -1.36 | 0.669 | -2.4  | 0.037 | -1.11 | 0.86  | -1.51 |
| 1441798_at   | ---           | ---                                                                              | -1.26 | 0.782 | -2.94 | 0.184 | -1.13 | 0.661 | -3.1  | 0.224 | -2.11 |
| 1446581_at   | Pcdh11x       | Protocadherin 11 X-linked                                                        | -1.91 | 0.378 | -1.15 | 0.254 | -1.6  | 0.525 | -3.08 | 0.324 | -1.94 |
| 1423400_at   | Kl            | klotho                                                                           | -1.57 | 0.091 | -1.3  | 0.387 | -1.62 | 0.147 | -1.21 | 0.763 | -1.43 |
| 1421691_at   | Krtap16-7     | keratin associated protein 16-7                                                  | -1.48 | 0.408 | -1.3  | 0.673 | -1.73 | 0.241 | -2.47 | 0.201 | -1.75 |
| 1454496_at   | 5031415H12Rik | RIKEN cDNA 5031415H12 gene                                                       | -2.26 | 0.017 | -1.25 | 0.289 | -1.29 | 0.598 | -1.2  | 0.758 | -1.5  |
| 1422305_at   | Ifnb1         | interferon beta 1, fibroblast                                                    | -1.5  | 0.143 | -1.93 | 0.444 | -1.19 | 0.705 | -1.11 | 0.681 | -1.44 |
| 1439250_at   | Slitr3        | SLIT and NTRK-like family, member 3                                              | -1.75 | 0.029 | -1.07 | 0.762 | -1.94 | 0.463 | -1.61 | 0.474 | -1.59 |
| 1424633_at   | Camk1g        | calcium/calmodulin-dependent protein kinase I gamma                              | -1.49 | 0.438 | -1.64 | 0.071 | -1.35 | 0.505 | -1.44 | 0.573 | -1.48 |
| 1460064_at   | BC028789      | cDNA sequence BC028789                                                           | -3.01 | 0.082 | -1.19 | 0.454 | -1.18 | 0.798 | -1.18 | 0.678 | -1.64 |
| 1429836_at   | Ugcgl2        | UDP-glucose ceramide glucosyltransferase-like 2                                  | -1.26 | 0.345 | -1.51 | 0.189 | -1.76 | 0.053 | -1.97 | 0.147 | -1.63 |
| 1436459_at   | Gpr161        | G protein-coupled receptor 161                                                   | -1.11 | 0.831 | -1.95 | 0.202 | -1.63 | 0.338 | -2.03 | 0.503 | -1.68 |
| 1447712_x_at | Ep400         | E1A binding protein p400                                                         | -1.58 | 0.224 | -1.47 | 0.48  | -1.4  | 0.09  | -1.26 | 0.439 | -1.43 |
| 1422378_at   | V1rb7         | vomeroneasal 1 receptor, B7                                                      | -1.14 | 0.853 | -2.7  | 0.034 | -1.29 | 0.662 | -1.36 | 0.684 | -1.62 |
| 1443430_at   | Cradd         | CASP2 and RIPK1 domain containing adaptor with death domain                      | -1.34 | 0.021 | -1.42 | 0.025 | -1.73 | 0.031 | -1.21 | 0.512 | -1.43 |

|              |               |                                                                     |       |       |       |       |       |       |       |       |       |
|--------------|---------------|---------------------------------------------------------------------|-------|-------|-------|-------|-------|-------|-------|-------|-------|
| 1441748_at   | Zzz3          | Zinc finger, ZZ domain containing 3                                 | -1.57 | 0.234 | -1.45 | 0.283 | -1.43 | 0.23  | -1.19 | 0.07  | -1.41 |
| 1430267_at   | 4833422M21Rik | RIKEN cDNA 4833422M21 gene                                          | -2.19 | 0.224 | -1.08 | 0.825 | -1.55 | 0.481 | -3.38 | 0.013 | -2.05 |
| 1416039_x_at | Cyr61         | cysteine rich protein 61                                            | -1.29 | 0.492 | -1.57 | 0.085 | -1.63 | 0.281 | -1.42 | 0.329 | -1.48 |
| 1450490_at   | Kcna7         | potassium voltage-gated channel, shaker-related subfamily, member 7 | -1.39 | 0.674 | -2.42 | 0.148 | -1.12 | 0.787 | -2.45 | 0.046 | -1.85 |
| 1441634_at   | Ntngr1        | netrin G1                                                           | -1.55 | 0.173 | -2    | 0.248 | -1.14 | 0.809 | -1.02 | 0.976 | -1.43 |
| 1453938_at   | 9330198N18Rik | RIKEN cDNA 9330198N18 gene                                          | -1.48 | 0.135 | -1.44 | 0.621 | -1.52 | 0.3   | -1.04 | 0.781 | -1.37 |
| 1446118_at   | D17Ert165e    | DNA segment, Chr 17, ERATO Doi 165, expressed                       | -1.04 | 0.675 | -1.44 | 0.058 | -2.69 | 0.01  | -1.17 | 0.652 | -1.59 |
| 1430673_a_at | 2210009G21Rik | RIKEN cDNA 2210009G21 gene                                          | -1.68 | 0.478 | -1.85 | 0.196 | -1.12 | 0.748 | -1    | 0.997 | -1.41 |
| 1429646_at   | 1700112C13Rik | RIKEN cDNA 1700112C13 gene                                          | -2.07 | 0.317 | -1.16 | 0.81  | -1.46 | 0.239 | -1.45 | 0.565 | -1.54 |
| 1431613_a_at | 1700024D23Rik | RIKEN cDNA 1700024D23 gene                                          | -1.7  | 0.008 | -2.24 | 0.369 | -1.01 | 0.984 | -2.15 | 0.19  | -1.78 |
| 1450758_at   | Cntnap2       | contactin associated protein-like 2                                 | -1.43 | 0.604 | -1.95 | 0.439 | -1.23 | 0.21  | -1.18 | 0.719 | -1.45 |
| 1445151_at   | ---           | ---                                                                 | -1.59 | 0.029 | -1.76 | 0.19  | -1.2  | 0.391 | -1.46 | 0.14  | -1.5  |
| 1423802_at   | Camkv         | CaM kinase-like vesicle-associated                                  | -2.33 | 0.438 | -1.03 | 0.869 | -1.59 | 0.049 | -1.83 | 0.519 | -1.7  |
| 1453221_at   | Gopc          | golgi associated PDZ and coiled-coil motif containing               | -1.55 | 0.1   | -1.54 | 0.007 | -1.36 | 0.106 | -2.14 | 0.076 | -1.65 |
| 1427618_at   | Cdh9          | cadherin 9                                                          | -1.25 | 0.799 | -1.79 | 0.068 | -1.49 | 0.475 | -1.73 | 0.293 | -1.57 |
| 1446723_at   | ---           | ---                                                                 | -2.03 | 0.444 | -1.24 | 0.338 | -1.37 | 0.569 | -2.31 | 0.363 | -1.74 |
| 1420144_x_at | Mnab          | membrane associated DNA binding protein                             | -1.04 | 0.972 | -3.04 | 0.01  | -1.35 | 0.557 | -1.13 | 0.873 | -1.64 |
| 1447523_at   | Zfp294        | Zinc finger protein 294                                             | -1.5  | 0.311 | -2.04 | 0.042 | -1.15 | 0.651 | -1.24 | 0.246 | -1.48 |
| 1430471_at   | 9230110K08Rik | RIKEN cDNA 9230110K08 gene                                          | -1.9  | 0.182 | -1.76 | 0.327 | -1.07 | 0.788 | -1.02 | 0.945 | -1.44 |
| 1443949_at   | Ppp2r5e       | Protein phosphatase 2, regulatory subunit B (B56), epsilon isoform  | -1.2  | 0.347 | -1.4  | 0.089 | -2.07 | 0.004 | -1.19 | 0.478 | -1.46 |
| 1439536_at   | Al846133      | Expressed sequence Al846133                                         | -1.22 | 0.102 | -1.99 | 0.296 | -1.41 | 0.103 | -1.51 | 0.342 | -1.53 |
| 1456644_at   | 5730528L13Rik | RIKEN cDNA 5730528L13 gene                                          | -1.89 | 0.128 | -1.37 | 0.662 | -1.3  | 0.428 | -1.17 | 0.805 | -1.43 |
| 1457332_at   | Prmt3         | protein arginine N-methyltransferase 3                              | -1.74 | 0.208 | -1.92 | 0.416 | -1.07 | 0.587 | -1.2  | 0.443 | -1.48 |
| 1444826_at   | ---           | ---                                                                 | -2.92 | 0.018 | -1.12 | 0.543 | -1.26 | 0.397 | -1.16 | 0.562 | -1.61 |
| 1427133_s_at | Lrp2          | low density lipoprotein receptor-related protein 2                  | -1.12 | 0.196 | -3.89 | 0.125 | -1.13 | 0.534 | -1.46 | 0.457 | -1.9  |
| 1421800_at   | Phxr1         | per-hexamer repeat gene 1                                           | -1.3  | 0.485 | -1.82 | 0.063 | -1.4  | 0.16  | -1.19 | 0.009 | -1.43 |
| 1440401_at   | ---           | ---                                                                 | -1.99 | 0.592 | -1.24 | 0.735 | -1.38 | 0.527 | -1.04 | 0.914 | -1.41 |
| 1421598_at   | ---           | ---                                                                 | -1.13 | 0.529 | -2.34 | 0.058 | -1.39 | 0.233 | -2.2  | 0.089 | -1.77 |
| 1451582_at   | Tulp1         | tubby like protein 1                                                | -1.54 | 0.055 | -1.23 | 0.172 | -1.76 | 0.227 | -1.77 | 0.509 | -1.57 |
| 1441684_at   | Ttc3          | tetratricopeptide repeat domain 3                                   | -1.08 | 0.845 | -1.79 | 0.304 | -1.83 | 0.053 | -1.77 | 0.189 | -1.62 |
| 1433344_at   | 4930448K20Rik | RIKEN cDNA 4930448K20 gene                                          | -1.34 | 0.502 | -1.5  | 0.274 | -1.61 | 0.235 | -1.08 | 0.864 | -1.38 |
| 1457991_at   | Abcd3         | ATP-binding cassette, sub-family D (ALD), member 3                  | -1.23 | 0.673 | -1.77 | 0.111 | -1.52 | 0.152 | -1.95 | 0.406 | -1.62 |
| 1459768_x_at | Rap1gds1      | RAP1, GTP-GDP dissociation stimulator 1                             | -1.09 | 0.776 | -1.85 | 0.12  | -1.75 | 0.158 | -1.04 | 0.909 | -1.43 |
| 1430754_at   | 4930511H11Rik | RIKEN cDNA 4930511H11 gene                                          | -1.82 | 0.111 | -1.68 | 0.337 | -1.13 | 0.794 | -1.28 | 0.104 | -1.48 |
| 1447142_at   | Cts7          | cathepsin 7                                                         | -1.21 | 0.436 | -1.54 | 0.52  | -1.79 | 0.494 | -1.05 | 0.807 | -1.4  |
| 1450625_at   | Col5a2        | procollagen, type V, alpha 2                                        | -1.41 | 0.132 | -1.32 | 0.652 | -1.76 | 0.02  | -1.26 | 0.389 | -1.44 |
| 1455235_x_at | Ldhd          | lactate dehydrogenase B                                             | -1.26 | 0.154 | -2.13 | 0.107 | -1.29 | 0.132 | -1.49 | 0.281 | -1.54 |
| 1432067_at   | 4930473O22Rik | RIKEN cDNA 4930473O22 gene                                          | -2.36 | 0.015 | -1.19 | 0.77  | -1.3  | 0.586 | -1.24 | 0.772 | -1.52 |
| 1446201_at   | 9030420J04Rik | RIKEN cDNA 9030420J04 gene                                          | -1.16 | 0.479 | -1.58 | 0.147 | -1.86 | 0.114 | -1.24 | 0.771 | -1.46 |
| 1450760_a_at | Ing3          | inhibitor of growth family, member 3                                | -1.86 | 0.373 | -1.3  | 0.397 | -1.37 | 0.294 | -2.07 | 0.161 | -1.65 |
| 1438279_at   | Dpp4          | Dipeptidylpeptidase 4                                               | -1.31 | 0.135 | -1.38 | 0.233 | -1.82 | 0.081 | -2.15 | 0.113 | -1.67 |
| 1428948_at   | 5730414M22Rik | RIKEN cDNA 5730414M22 gene                                          | -1.24 | 0.045 | -3.46 | 0.048 | -1.06 | 0.855 | -1.09 | 0.885 | -1.71 |
| 1443817_x_at | Nkx2-6        | NK2 transcription factor related, locus 6 (Drosophila)              | -1.26 | 0.799 | -2.49 | 0.052 | -1.19 | 0.557 | -1.49 | 0.325 | -1.61 |
| 1433213_at   | 2700008E08Rik | RIKEN cDNA 2700008E08 gene                                          | -1.51 | 0.34  | -1.27 | 0.481 | -1.69 | 0.101 | -1.31 | 0.569 | -1.45 |
| 1440111_at   | Fmnl2         | Formin-like 2                                                       | -1.52 | 0.173 | -1.25 | 0.435 | -1.74 | 0.086 | -1.82 | 0.005 | -1.58 |
| 1454762_at   | Xkrx          | X Kell blood group precursor related X linked                       | -1.83 | 0.356 | -1.68 | 0.61  | -1.11 | 0.61  | -2.3  | 0.128 | -1.73 |
| 1445083_at   | ---           | Transcribed locus                                                   | -2.6  | 0.141 | -1.15 | 0.653 | -1.28 | 0.619 | -1.21 | 0.61  | -1.56 |
| 1442592_at   | Ppapdc3       | Phosphatidic acid phosphatase type 2 domain containing 3            | -1.33 | 0.62  | -1.48 | 0.153 | -1.63 | 0.388 | -1.53 | 0.39  | -1.49 |
| 1437676_at   | Spag9         | sperm associated antigen 9                                          | -1.49 | 0.024 | -1.19 | 0.285 | -1.89 | 0.02  | -1.52 | 0.232 | -1.52 |
| 1444677_at   | C77673        | expressed sequence C77673                                           | -1.54 | 0.145 | -1.28 | 0.182 | -1.64 | 0.098 | -1.2  | 0.141 | -1.42 |
| 1447741_x_at | Acad10        | acyl-Coenzyme A dehydrogenase family, member 10                     | -1.95 | 0.29  | -1.44 | 0.563 | -1.2  | 0.724 | -1.52 | 0.601 | -1.53 |
| 1459434_at   | Pdhx          | Pyruvate dehydrogenase complex, component X                         | -1.2  | 0.555 | -1.64 | 0.139 | -1.68 | 0.217 | -1.31 | 0.439 | -1.46 |
| 1452270_s_at | Cubn          | cubilin (intrinsic factor-cobalamin receptor)                       | -1.1  | 0.085 | -3.97 | 0.174 | -1.13 | 0.859 | -1.1  | 0.857 | -1.83 |

|              |                    |                                                                                      |       |       |       |       |       |       |       |       |       |
|--------------|--------------------|--------------------------------------------------------------------------------------|-------|-------|-------|-------|-------|-------|-------|-------|-------|
| 1422134_at   | Fosb               | FBJ osteosarcoma oncogene B                                                          | -2.33 | 0.241 | -1.54 | 0.231 | -1.04 | 0.927 | -1.43 | 0.12  | -1.58 |
| 1441479_at   | Ppm1b              | Protein phosphatase 1B, magnesium dependent, beta isoform                            | -1.35 | 0.399 | -1.36 | 0.298 | -1.77 | 0.022 | -1.18 | 0.29  | -1.41 |
| 1439679_at   | Cct3               | chaperonin subunit 3 (gamma)                                                         | -1.58 | 0.113 | -1.38 | 0.615 | -1.46 | 0.385 | -1.35 | 0.685 | -1.44 |
| 1457712_at   | Chd8               | chromodomain helicase DNA binding protein 8                                          | -1.16 | 0.125 | -1.58 | 0.022 | -1.84 | 0.002 | -1.43 | 0.098 | -1.5  |
| 1445895_at   | Tcrb-V8.2          | T-cell receptor beta, variable 8.2                                                   | -2.22 | 0.279 | -1.18 | 0.723 | -1.34 | 0.259 | -1.43 | 0.029 | -1.54 |
| 1435298_at   | Cog5               | component of oligomeric golgi complex 5                                              | -1.33 | 0.556 | -1.63 | 0.027 | -1.48 | 0.017 | -1.9  | 0.2   | -1.58 |
| 1435673_at   | Al448005           | expressed sequence Al448005                                                          | -1.48 | 0.036 | -1.39 | 0.402 | -1.54 | 0.145 | -1.11 | 0.636 | -1.38 |
| 1441167_at   | ---                | Transcribed locus                                                                    | -1.45 | 0.48  | -1.53 | 0.249 | -1.43 | 0.441 | -1.5  | 0.165 | -1.48 |
| 1438109_at   | Clca5              | chloride channel calcium activated 5                                                 | -1.3  | 0.671 | -1.58 | 0.486 | -1.55 | 0.356 | -1.15 | 0.783 | -1.4  |
| 1447313_at   | ---                | ---                                                                                  | -1.36 | 0.169 | -1.45 | 0.172 | -1.61 | 0.087 | -1.01 | 0.976 | -1.36 |
| 1443299_at   | Pdlim3             | PDZ and LIM domain 3                                                                 | -1.63 | 0.029 | -1.47 | 0.202 | -1.33 | 0.287 | -1.69 | 0.153 | -1.53 |
| 1440638_at   | A230107N01Rik      | RIKEN cDNA A230107N01 gene                                                           | -1    | 0.996 | -1.75 | 0.119 | -2.1  | 0.084 | -2.17 | 0.401 | -1.75 |
| 1428030_at   | Adam34             | a disintegrin and metallopeptidase domain 34                                         | -2.24 | 0.038 | -1.06 | 0.903 | -1.53 | 0.494 | -1.78 | 0.075 | -1.65 |
| 1453494_at   | 4921513H07Rik      | RIKEN cDNA 4921513H07 gene                                                           | -1.48 | 0.591 | -1.32 | 0.662 | -1.64 | 0.026 | -1.02 | 0.97  | -1.36 |
| 1438674_a_at | Sfrs8              | splicing factor, arginine/serine-rich 8                                              | -1.48 | 0.074 | -1.31 | 0.037 | -1.64 | 0.207 | -1.36 | 0.129 | -1.45 |
| 1427648_at   | Rgs3               | Regulator of G-protein signaling 3                                                   | -1.34 | 0.516 | -1.71 | 0.253 | -1.39 | 0.685 | -1.67 | 0.53  | -1.53 |
| 1445914_at   | Nrf1               | Nuclear respiratory factor 1                                                         | -1.34 | 0.119 | -1.32 | 0.327 | -1.85 | 0.04  | -1.01 | 0.88  | -1.38 |
| 1419439_at   | Stk22s1 /// LOC672 | serine/threonine kinase 22 substrate 1 /// similar to serine/threonine kinase 22 sul | -1.71 | 0.205 | -1.23 | 0.171 | -1.56 | 0.155 | -1.84 | 0.055 | -1.58 |
| 1458240_at   | Magi1              | Membrane associated guanylate kinase, WW and PDZ domain containing 1                 | -1.22 | 0.229 | -1.4  | 0.191 | -1.97 | 0.033 | -1.56 | 0.224 | -1.54 |
| 1436629_at   | A830041P22Rik      | RIKEN cDNA A830041P22 gene                                                           | -1.23 | 0.325 | -2.27 | 0.106 | -1.26 | 0.644 | -4.88 | 0.022 | -2.41 |
| 1443416_at   | C79741             | expressed sequence C79741                                                            | -1.48 | 0.266 | -1.42 | 0.113 | -1.5  | 0.002 | -1.06 | 0.673 | -1.36 |
| 1427791_a_at | Adam1a             | a disintegrin and metallopeptidase domain 1a                                         | -1.1  | 0.616 | -1.43 | 0.422 | -2.29 | 0.013 | -1.8  | 0.067 | -1.65 |
| 1441342_at   | Dpp4               | Dipeptidylpeptidase 4                                                                | -1.15 | 0.185 | -1.46 | 0.015 | -2.02 | 0.01  | -2.74 | 0.066 | -1.84 |
| 1421437_x_at | Pcdhb14            | protocadherin beta 14                                                                | -1.48 | 0.6   | -1.19 | 0.471 | -1.87 | 0.196 | -2.39 | 0.229 | -1.73 |
| 1458326_at   | Polr2e             | polymerase (RNA) II (DNA directed) polypeptide E                                     | -1.55 | 0.322 | -1.43 | 0.539 | -1.43 | 0.456 | -1.29 | 0.155 | -1.42 |
| 1440675_at   | Grif1              | Glucocorticoid receptor DNA binding factor 1                                         | -1.34 | 0.039 | -1.43 | 0.02  | -1.67 | 0.143 | -1.53 | 0.395 | -1.49 |
| 1448831_at   | Angpt2             | angiopoietin 2                                                                       | -1.19 | 0.2   | -1.35 | 0.386 | -2.13 | 0.018 | -1.76 | 0.073 | -1.61 |
| 1442067_at   | Ror1               | Receptor tyrosine kinase-like orphan receptor 1                                      | -1.15 | 0.4   | -1.32 | 0.219 | -2.39 | 0.033 | -1.55 | 0.166 | -1.6  |
| 1457544_at   | Ube2w              | ubiquitin-conjugating enzyme E2W (putative)                                          | -1.12 | 0.888 | -3.04 | 0.024 | -1.2  | 0.583 | -1.24 | 0.749 | -1.65 |
| 1446943_at   | Dst                | Dystonin                                                                             | -1.05 | 0.873 | -1.47 | 0.497 | -2.39 | 0.015 | -1.13 | 0.864 | -1.51 |
| 1437919_at   | Bdp1               | B double prime 1, subunit of RNA polymerase III transcription initiation factor IIIB | -1.16 | 0.593 | -1.38 | 0.318 | -2.14 | 0.001 | -1.29 | 0.365 | -1.5  |
| 1459512_at   | Meis1              | Myeloid ecotropic viral integration site 1                                           | -1.03 | 0.889 | -1.68 | 0.215 | -2.05 | 0.057 | -1.13 | 0.629 | -1.47 |
| 1437493_at   | 5230400M03Rik      | RIKEN cDNA 5230400M03 gene                                                           | -1.21 | 0.704 | -1.41 | 0.218 | -1.93 | 0.031 | -2.03 | 0.013 | -1.65 |
| 1441362_at   | Ptprg              | Protein tyrosine phosphatase, receptor type, G                                       | -1.55 | 0.29  | -1.45 | 0.126 | -1.4  | 0.013 | -1.29 | 0.404 | -1.42 |
| 1430185_at   | 5830460E08Rik      | RIKEN cDNA 5830460E08 gene                                                           | -1.43 | 0.087 | -1.28 | 0.177 | -1.76 | 0.009 | -1.22 | 0.555 | -1.42 |
| 1456723_at   | Prr14              | Proline rich 14                                                                      | -1.27 | 0.693 | -1.93 | 0.127 | -1.34 | 0.3   | -1.08 | 0.769 | -1.41 |
| 1446400_at   | Olf558             | olfactory receptor 558                                                               | -1.18 | 0.274 | -1.43 | 0.1   | -1.97 | 0.24  | -2.92 | 0.341 | -1.88 |
| 1445710_x_at | 1110051B16Rik      | RIKEN cDNA 1110051B16 gene                                                           | -1.29 | 0.754 | -1.42 | 0.337 | -1.75 | 0.032 | -1.17 | 0.752 | -1.41 |
| 1444378_at   | Csnk1d             | Casein kinase 1, delta                                                               | -1.55 | 0.161 | -1.58 | 0.014 | -1.29 | 0.366 | -1.11 | 0.033 | -1.38 |
| 1444591_at   | Pik3r1             | Phosphatidylinositol 3-kinase, regulatory subunit, polypeptide 1 (p85 alpha)         | -1.15 | 0.61  | -1.47 | 0.069 | -1.99 | 0.038 | -2.14 | 0.035 | -1.69 |
| 1440432_at   | Lztf1              | Leucine zipper transcription factor-like 1                                           | -1.19 | 0.733 | -2.39 | 0.081 | -1.26 | 0.437 | -2.6  | 0.054 | -1.86 |
| 1423014_at   | Pcdhb6             | protocadherin beta 6                                                                 | -1.41 | 0.68  | -1.67 | 0.226 | -1.34 | 0.171 | -1.03 | 0.937 | -1.36 |
| 1456692_at   | Brd1               | Bromodomain containing 1                                                             | -1.35 | 0.411 | -1.12 | 0.352 | -2.39 | 0.374 | -1.21 | 0.569 | -1.52 |
| 1457742_at   | D9Wsu74e           | DNA segment, Chr 9, Wayne State University 74, expressed                             | -1.04 | 0.581 | -2.52 | 0.219 | -1.43 | 0.123 | -1.06 | 0.913 | -1.51 |
| 1458426_at   | Kif1b              | Kinesin family member 1B                                                             | -1.33 | 0.123 | -1.32 | 0.285 | -1.85 | 0.012 | -1.38 | 0.021 | -1.47 |
| 1420281_at   | ---                | ---                                                                                  | -1.07 | 0.937 | -1.75 | 0.323 | -1.83 | 0.255 | -1.35 | 0.655 | -1.5  |
| 1441657_at   | Bach2              | BTB and CNC homology 2                                                               | -2.05 | 0.012 | -1.48 | 0.35  | -1.12 | 0.703 | -1.89 | 0.142 | -1.64 |
| 1438538_at   | D630021H01Rik      | RIKEN cDNA D630021H01 gene                                                           | -1.31 | 0.291 | -1.32 | 0.081 | -1.88 | 0.05  | -1.17 | 0.562 | -1.42 |
| 1446818_at   | Mib1               | Mindbomb homolog 1 (Drosophila)                                                      | -1.27 | 0.439 | -2.06 | 0.062 | -1.28 | 0.203 | -1.3  | 0.476 | -1.48 |
| 1454413_at   | 4933424H11Rik      | RIKEN cDNA 4933424H11 gene                                                           | -1.09 | 0.495 | -2.02 | 0.334 | -1.55 | 0.346 | -1.33 | 0.651 | -1.5  |
| 1434760_at   | Lrrtm3             | leucine rich repeat transmembrane neuronal 3                                         | -1.19 | 0.758 | -1.72 | 0.332 | -1.59 | 0.36  | -1.97 | 0.09  | -1.62 |
| 1439348_at   | S100a10            | S100 calcium binding protein A10 (calpactin)                                         | -1.3  | 0.553 | -1.48 | 0.077 | -1.65 | 0.157 | -1.5  | 0.214 | -1.48 |
| 1429903_at   | Gja10 /// Dpf2     | gap junction membrane channel protein alpha 10 /// D4, zinc and double PHD finç      | -1.53 | 0.194 | -1.31 | 0.246 | -1.58 | 0.09  | -1.24 | 0.181 | -1.41 |

|              |               |                                                               |       |       |       |       |       |       |       |       |       |
|--------------|---------------|---------------------------------------------------------------|-------|-------|-------|-------|-------|-------|-------|-------|-------|
| 1446110_at   | D3ErtD711e    | DNA segment, Chr 3, ERATO Doi 711, expressed                  | -2.06 | 0.32  | -1.25 | 0.329 | -1.31 | 0.548 | -1.23 | 0.477 | -1.46 |
| 1426129_at   | Brms1         | breast cancer metastasis-suppressor 1                         | -1.82 | 0.197 | -1.15 | 0.574 | -1.57 | 0.057 | -1.19 | 0.492 | -1.43 |
| 1447010_at   | Zfp609        | Zinc finger protein 609                                       | -1.06 | 0.692 | -1.36 | 0.242 | -2.62 | 0.028 | -1.48 | 0.176 | -1.63 |
| 1441452_at   | Lsm1          | LSM1 homolog, U6 small nuclear RNA associated (S. cerevisiae) | -1.07 | 0.235 | -2.17 | 0.121 | -1.51 | 0.095 | -1.43 | 0.061 | -1.55 |
| 1431880_at   | 3100003M19Rik | RIKEN cDNA 3100003M19 gene                                    | -1.14 | 0.805 | -1.48 | 0.318 | -1.99 | 0.103 | -1.06 | 0.886 | -1.42 |
| 1441357_at   | Kirrel3       | kin of IRRE like 3 (Drosophila)                               | -1.22 | 0.395 | -3.16 | 0.169 | -1.09 | 0.696 | -1.06 | 0.876 | -1.63 |
| 1460152_at   | ---           | ---                                                           | -1.7  | 0.194 | -1.54 | 0.556 | -1.22 | 0.675 | -1.64 | 0.417 | -1.53 |
| 1456067_at   | Gli3          | GLI-Kruppel family member GLI3                                | -1.09 | 0.737 | -2.44 | 0.236 | -1.37 | 0.121 | -1.23 | 0.475 | -1.53 |
| 1453672_at   | 2810038L03Rik | RIKEN cDNA 2810038L03 gene                                    | -2.14 | 0.239 | -1    | 0.995 | -1.68 | 0.224 | -1.05 | 0.933 | -1.47 |
| 1441135_at   | Zfp672        | Zinc finger protein 672                                       | -1.5  | 0.227 | -1.24 | 0.539 | -1.7  | 0.224 | -1.13 | 0.585 | -1.39 |
| 1432285_at   | 1700128F08Rik | RIKEN cDNA 1700128F08 gene                                    | -1.49 | 0.63  | -1.12 | 0.748 | -2.02 | 0.036 | -2.1  | 0.554 | -1.68 |
| 1434862_at   | Fut2          | fucosyltransferase 2                                          | -1.44 | 0.563 | -1.56 | 0.614 | -1.38 | 0.476 | -1.43 | 0.382 | -1.45 |
| 1442740_at   | ---           | ---                                                           | -1.62 | 0.407 | -1.04 | 0.868 | -2.09 | 0.081 | -1.16 | 0.321 | -1.48 |
| 1453881_x_at | Cetn1         | centrin 1                                                     | -1.51 | 0.184 | -1.79 | 0.482 | -1.2  | 0.605 | -1.1  | 0.792 | -1.4  |
| 1441614_at   | ---           | ---                                                           | -1.66 | 0.352 | -1.08 | 0.903 | -1.89 | 0.103 | -1.69 | 0.206 | -1.58 |
| 1440615_at   | Dusp16        | dual specificity phosphatase 16                               | -1.13 | 0.489 | -1.32 | 0.465 | -2.38 | 0.105 | -2.56 | 0.021 | -1.85 |
| 1430774_at   | A430106A12Rik | RIKEN cDNA A430106A12 gene                                    | -1.27 | 0.56  | -1.56 | 0.04  | -1.58 | 0.164 | -1.41 | 0.231 | -1.46 |
| 1453387_at   | 4833432E10Rik | RIKEN cDNA 4833432E10 gene                                    | -1.36 | 0.716 | -1.29 | 0.605 | -1.82 | 0.103 | -1.01 | 0.988 | -1.37 |
| 1416687_at   | Plod2         | procollagen lysine, 2-oxoglutarate 5-dioxygenase 2            | -1.15 | 0.656 | -1.44 | 0.442 | -2.01 | 0.008 | -1.16 | 0.095 | -1.44 |
| 1458826_at   | C78809        | expressed sequence C78809                                     | -1.11 | 0.866 | -2.08 | 0.325 | -1.47 | 0.335 | -1.75 | 0.223 | -1.6  |
| 1442017_at   | Nfs1          | nitrogen fixation gene 1 (S. cerevisiae)                      | -1.32 | 0.442 | -1.6  | 0.072 | -1.48 | 0.031 | -1.37 | 0.03  | -1.44 |
| 1445958_at   | ---           | Transcribed locus                                             | -2.27 | 0.142 | -1.57 | 0.273 | -1.02 | 0.966 | -1.47 | 0.472 | -1.58 |
| 1442653_at   | ---           | ---                                                           | -1.62 | 0.451 | -1.49 | 0.284 | -1.29 | 0.284 | -1.25 | 0.544 | -1.41 |
| 1442916_at   | 4931420C21Rik | RIKEN cDNA 4931420C21 gene                                    | -1.37 | 0.414 | -1.39 | 0.074 | -1.63 | 0.02  | -2.62 | 0.064 | -1.75 |
| 1437294_at   | Exosc10       | exosome component 10                                          | -1.06 | 0.051 | -2.03 | 0.027 | -1.6  | 0.136 | -1.42 | 0.037 | -1.53 |
| 1440989_at   | ---           | ---                                                           | -1.78 | 0.198 | -1.41 | 0.045 | -1.27 | 0.386 | -1.2  | 0.441 | -1.41 |
| 1443424_at   | 2210018M11Rik | RIKEN cDNA 2210018M11 gene                                    | -1.78 | 0.245 | -1.82 | 0.007 | -1.06 | 0.871 | -1.14 | 0.514 | -1.45 |
| 1438133_a_at | Cyr61         | cysteine rich protein 61                                      | -1.38 | 0.362 | -1.81 | 0.103 | -1.28 | 0.646 | -1.27 | 0.425 | -1.43 |
| 1460593_at   | Susd4         | sushi domain containing 4                                     | -1.12 | 0.582 | -2.32 | 0.015 | -1.36 | 0.094 | -2.11 | 0.191 | -1.73 |
| 1432306_at   | A930023M06Rik | RIKEN cDNA A930023M06 gene                                    | -1.29 | 0.084 | -1.84 | 0.282 | -1.35 | 0.385 | -1.48 | 0.136 | -1.49 |
| 1430818_at   | Tmc1          | transmembrane channel-like gene family 1                      | -1.47 | 0.136 | -1.4  | 0.335 | -1.5  | 0.245 | -1.7  | 0.08  | -1.52 |
| 1440012_at   | ---           | ---                                                           | -1.17 | 0.385 | -1.66 | 0.028 | -1.65 | 0.088 | -1.19 | 0.599 | -1.42 |
| 1432509_at   | 5033430I15Rik | RIKEN cDNA 5033430I15 gene                                    | -1.27 | 0.357 | -1.78 | 0.112 | -1.4  | 0.188 | -1.59 | 0.293 | -1.51 |
| 1457282_x_at | Tubgcp5       | Tubulin, gamma complex associated protein 5                   | -1.59 | 0.275 | -1.26 | 0.556 | -1.57 | 0.068 | -1.16 | 0.391 | -1.39 |
| 1459049_at   | Rasgrf1       | RAS protein-specific guanine nucleotide-releasing factor 1    | -2.43 | 0.093 | -1.44 | 0.331 | -1.04 | 0.924 | -1.84 | 0.107 | -1.69 |
| 1445996_at   | Plac9         | Placenta specific 9                                           | -1.17 | 0.63  | -1.54 | 0.095 | -1.78 | 0.084 | -1.11 | 0.817 | -1.4  |
| 1430121_at   | 1700006E09Rik | RIKEN cDNA 1700006E09 gene                                    | -1.27 | 0.556 | -1.62 | 0.353 | -1.53 | 0.417 | -1.21 | 0.541 | -1.4  |
| 1458337_at   | Tcf12         | Transcription factor 12                                       | -1.74 | 0.256 | -1.2  | 0.774 | -1.52 | 0.467 | -1.29 | 0.572 | -1.44 |
| 1446850_at   | Ppap2b        | Phosphatidic acid phosphatase type 2B                         | -1.36 | 0.04  | -1.23 | 0.323 | -1.94 | 0.03  | -1.32 | 0.478 | -1.46 |
| 1430685_at   | 6330503C03Rik | RIKEN cDNA 6330503C03 gene                                    | -2.05 | 0.295 | -1.14 | 0.748 | -1.43 | 0.405 | -1.59 | 0.156 | -1.55 |
| 1442755_at   | ---           | Transcribed locus                                             | -1.12 | 0.693 | -2    | 0.051 | -1.49 | 0.26  | -1.26 | 0.235 | -1.47 |
| 1420747_at   | Ppnr          | per-pentamer repeat gene                                      | -1.52 | 0.332 | -1.13 | 0.689 | -1.94 | 0.135 | -1.05 | 0.859 | -1.41 |
| 1433197_at   | 4930445B03Rik | RIKEN cDNA 4930445B03 gene                                    | -1.4  | 0.296 | -1.56 | 0.298 | -1.42 | 0.35  | -1.13 | 0.471 | -1.37 |
| 1455419_at   | D630045J12Rik | RIKEN cDNA D630045J12 gene                                    | -1.44 | 0.084 | -2.07 | 0.313 | -1.12 | 0.327 | -1.14 | 0.823 | -1.44 |
| 1438879_at   | Ddah1         | Dimethylarginine dimethylaminohydrolase 1                     | -1.32 | 0.083 | -2.08 | 0.072 | -1.21 | 0.521 | -2.39 | 0.251 | -1.75 |
| 1456708_at   | 2610028E06Rik | RIKEN cDNA 2610028E06 gene                                    | -2.45 | 0.129 | -1.42 | 0.255 | -1.05 | 0.586 | -1.06 | 0.87  | -1.49 |
| 1442214_at   | Nfib          | Nuclear factor I/B                                            | -1.17 | 0.346 | -1.4  | 0.132 | -2.01 | 0.005 | -1.03 | 0.746 | -1.4  |
| 1446477_at   | Zfp622        | zinc finger protein 622                                       | -1.61 | 0.484 | -1.94 | 0.102 | -1.07 | 0.786 | -1.59 | 0.108 | -1.55 |
| 1425688_a_at | Dpys          | dihydropyrimidinase                                           | -1.33 | 0.496 | -1.28 | 0.035 | -1.88 | 0.2   | -1.88 | 0.221 | -1.59 |
| 1432888_at   | 4930455M05Rik | RIKEN cDNA 4930455M05 gene                                    | -1.35 | 0.112 | -1.86 | 0     | -1.27 | 0.312 | -1.4  | 0.339 | -1.47 |
| 1439131_at   | 4932441K18Rik | RIKEN cDNA 4932441K18 gene                                    | -1.88 | 0.208 | -1.47 | 0.255 | -1.17 | 0.382 | -1.22 | 0.199 | -1.44 |
| 1429597_at   | Dppa4         | developmental pluripotency associated 4                       | -1.79 | 0.027 | -1.32 | 0.499 | -1.33 | 0.448 | -1.16 | 0.309 | -1.4  |
| 1442405_at   | Csrp2bp       | Cysteine and glycine-rich protein 2 binding protein           | -1.29 | 0.619 | -1.6  | 0.039 | -1.5  | 0.232 | -1.53 | 0.063 | -1.48 |

|              |                    |                                                                                    |       |       |       |       |       |       |       |       |       |
|--------------|--------------------|------------------------------------------------------------------------------------|-------|-------|-------|-------|-------|-------|-------|-------|-------|
| 1440794_x_at | 1700029M03Rik      | RIKEN cDNA 1700029M03 gene                                                         | -1.39 | 0.583 | -2.28 | 0.247 | -1.1  | 0.818 | -1.3  | 0.556 | -1.52 |
| 1427790_at   | Mapkapk5 /// Adam  | MAP kinase-activated protein kinase 5 /// a disintegrin and metallopeptidase dom   | -1.75 | 0.136 | -1.56 | 0.188 | -1.16 | 0.676 | -1.29 | 0.385 | -1.44 |
| 1441596_at   | 5730601F06Rik      | RIKEN cDNA 5730601F06 gene                                                         | -1.13 | 0.777 | -1.39 | 0.387 | -2.15 | 0.271 | -1.76 | 0.145 | -1.61 |
| 1441620_at   | Grb10              | Growth factor receptor bound protein 10                                            | -1.44 | 0.282 | -1.31 | 0.494 | -1.63 | 0.082 | -1.28 | 0.686 | -1.42 |
| 1442184_at   | Slc24a3            | Solute carrier family 24 (sodium/potassium/calcium exchanger), member 3            | -1.87 | 0.43  | -1.69 | 0.269 | -1.06 | 0.893 | -1.56 | 0.528 | -1.55 |
| 1458648_at   | AU042950           | expressed sequence AU042950                                                        | -1.3  | 0.2   | -1.21 | 0.638 | -2.1  | 0.002 | -1.21 | 0.569 | -1.46 |
| 1425124_at   | Rnf183             | ring finger protein 183                                                            | -1.33 | 0.33  | -1.45 | 0.273 | -1.59 | 0.168 | -1.38 | 0.694 | -1.44 |
| 1441148_at   | Fcmd               | Fukuyama type congenital muscular dystrophy homolog (human)                        | -1.32 | 0.047 | -1.73 | 0.113 | -1.37 | 0.241 | -1.22 | 0.543 | -1.41 |
| 1431399_at   | Adamts9            | a disintegrin-like and metallopeptidase (reprolysin type) with thrombospondin type | -1.34 | 0.353 | -1.4  | 0.375 | -1.63 | 0.237 | -1.59 | 0.312 | -1.49 |
| 1445225_at   | 2410001C21Rik      | RIKEN cDNA 2410001C21 gene                                                         | -1.32 | 0.437 | -2.33 | 0.053 | -1.13 | 0.352 | -1.2  | 0.09  | -1.5  |
| 1429813_at   | Pank1              | pantothenate kinase 1                                                              | -1.17 | 0.662 | -1.48 | 0.261 | -1.85 | 0.327 | -1.05 | 0.934 | -1.39 |
| 1446220_at   | Gm484              | gene model 484, (NCBI)                                                             | -1.36 | 0.499 | -1.64 | 0.368 | -1.38 | 0.626 | -1.08 | 0.899 | -1.37 |
| 1428662_a_at | Hod                | homeobox only domain                                                               | -1.49 | 0.024 | -1.39 | 0.157 | -1.47 | 0.005 | -1.15 | 0.754 | -1.37 |
| 1430846_at   | 1700061G19Rik      | RIKEN cDNA 1700061G19 gene                                                         | -1.35 | 0.436 | -1.76 | 0.234 | -1.31 | 0.415 | -1.39 | 0.079 | -1.45 |
| 1460421_at   | Zfp133             | zinc finger protein 133                                                            | -1.29 | 0.363 | -2.58 | 0.062 | -1.1  | 0.792 | -1.03 | 0.532 | -1.5  |
| 1445610_at   | BC039093           | CDNA sequence BC039093                                                             | -1.92 | 0.39  | -1.1  | 0.859 | -1.56 | 0.293 | -1.32 | 0.392 | -1.48 |
| 1429068_at   | 2810488G03Rik      | RIKEN cDNA 2810488G03 gene                                                         | -1.12 | 0.675 | -2.19 | 0.111 | -1.39 | 0.142 | -1.2  | 0.558 | -1.48 |
| 1457245_at   | Dirc2              | disrupted in renal carcinoma 2 (human)                                             | -1.08 | 0.66  | -2.13 | 0.132 | -1.48 | 0.151 | -1.17 | 0.143 | -1.46 |
| 1437884_at   | Arl5b              | ADP-ribosylation factor-like 5B                                                    | -1.21 | 0.048 | -1.3  | 0.136 | -2.09 | 0.011 | -1.09 | 0.791 | -1.42 |
| 1458502_at   | Ktn1               | Kinectin 1                                                                         | -1.32 | 0.153 | -3.16 | 0.129 | -1    | 0.994 | -2.16 | 0.039 | -1.91 |
| 1441038_at   | Utrn               | Utrophin                                                                           | -1.12 | 0.501 | -1.19 | 0.194 | -2.97 | 0.028 | -1.71 | 0.135 | -1.75 |
| 1459033_at   | Plxna2             | Plexin A2                                                                          | -1.33 | 0.305 | -1.11 | 0.877 | -2.42 | 0.123 | -1.09 | 0.865 | -1.48 |
| 1430103_at   | 9030607L20Rik      | RIKEN cDNA 9030607L20 gene                                                         | -1.36 | 0.075 | -1.67 | 0.265 | -1.36 | 0.011 | -1.14 | 0.588 | -1.38 |
| 1435603_at   | Sned1              | sushi, nidogen and EGF-like domains 1                                              | -1.14 | 0.034 | -2.11 | 0.061 | -1.38 | 0.278 | -1.3  | 0.609 | -1.48 |
| 1435411_at   | ---                | Transcribed locus                                                                  | -1.35 | 0.59  | -1.36 | 0.098 | -1.68 | 0.26  | -2.14 | 0.181 | -1.63 |
| 1447409_at   | ---                | ---                                                                                | -1.75 | 0.028 | -1.41 | 0.1   | -1.27 | 0.169 | -1.64 | 0.101 | -1.52 |
| 1444208_at   | Dnahc1             | Dynein, axonemal, heavy chain 1                                                    | -1.45 | 0.498 | -1.29 | 0.382 | -1.65 | 0.109 | -1.04 | 0.931 | -1.36 |
| 1442901_at   | Tax1bp1            | Tax1 (human T-cell leukemia virus type I) binding protein 1                        | -1.46 | 0.314 | -1.89 | 0.192 | -1.17 | 0.6   | -1.03 | 0.896 | -1.38 |
| 1456101_at   | LOC640072 /// LOC  | hypothetical protein LOC640072 /// hypothetical protein LOC677194                  | -1.34 | 0.647 | -1.53 | 0.334 | -1.48 | 0.507 | -1.61 | 0.305 | -1.49 |
| 1446386_at   | Tcf4               | Transcription factor 4                                                             | -1.2  | 0.622 | -1.64 | 0.006 | -1.58 | 0.002 | -1.58 | 0.245 | -1.5  |
| 1444917_at   | Ube2w              | Ubiquitin-conjugating enzyme E2W (putative)                                        | -2.16 | 0.012 | -1.19 | 0.823 | -1.3  | 0.072 | -1.86 | 0.163 | -1.63 |
| 1420149_at   | Pcnt               | Pericentrin (kendrin)                                                              | -1.58 | 0.242 | -1.15 | 0.755 | -1.75 | 0.431 | -1.7  | 0.478 | -1.55 |
| 1459142_at   | Spag17             | sperm associated antigen 17                                                        | -1.79 | 0.477 | -1.86 | 0.473 | -1.02 | 0.653 | -1.99 | 0.441 | -1.67 |
| 1441763_at   | Zdhhc6             | zinc finger, DHHC domain containing 6                                              | -1.24 | 0.681 | -1.59 | 0.189 | -1.56 | 0.106 | -1.43 | 0.181 | -1.46 |
| 1430175_at   | 4930588G05Rik      | RIKEN cDNA 4930588G05 gene                                                         | -1.1  | 0.891 | -1.85 | 0.017 | -1.59 | 0.134 | -1.54 | 0.154 | -1.52 |
| 1453847_at   | A930037O16Rik      | RIKEN cDNA A930037O16 gene                                                         | -1.12 | 0.866 | -2.76 | 0.219 | -1.22 | 0.477 | -1.07 | 0.935 | -1.54 |
| 1445720_at   | Sltm               | SAFB-like, transcription modulator                                                 | -1.73 | 0.025 | -1.67 | 0.1   | -1.11 | 0.422 | -1.52 | 0.274 | -1.51 |
| 1421084_at   | Rs1h               | retinoschisis 1 homolog (human)                                                    | -1.14 | 0.771 | -1.69 | 0.287 | -1.65 | 0.093 | -1.46 | 0.204 | -1.49 |
| 1425709_at   | Rnf17              | ring finger protein 17                                                             | -1.53 | 0.638 | -1.53 | 0.575 | -1.3  | 0.583 | -3.87 | 0.122 | -2.06 |
| 1443661_at   | ---                | ---                                                                                | -1.51 | 0.269 | -2.01 | 0.264 | -1.1  | 0.821 | -1.07 | 0.908 | -1.42 |
| 1418188_a_at | Malat1             | Metastasis associated lung adenocarcinoma transcript 1 (non-coding RNA)            | -1.18 | 0.656 | -1.54 | 0.123 | -1.73 | 0.02  | -1.69 | 0.34  | -1.54 |
| 1443376_at   | ---                | Transcribed locus                                                                  | -1.61 | 0.317 | -1.32 | 0.595 | -1.44 | 0.401 | -1.06 | 0.876 | -1.36 |
| 1445834_at   | ---                | Transcribed locus                                                                  | -2.31 | 0.397 | -1.08 | 0.669 | -1.4  | 0.464 | -1.25 | 0.391 | -1.51 |
| 1444318_at   | Chchd7             | Coiled-coil-helix-coiled-coil-helix domain containing 7                            | -1.11 | 0.314 | -2.41 | 0.021 | -1.31 | 0.251 | -1.81 | 0     | -1.66 |
| 1441449_at   | Jarid1c            | jumonji, AT rich interactive domain 1C (Rbp2 like)                                 | -1.05 | 0.949 | -1.44 | 0.25  | -2.33 | 0.01  | -1.02 | 0.92  | -1.46 |
| 1440155_at   | Fstl4              | folliculin-like 4                                                                  | -1.71 | 0.298 | -1.85 | 0.336 | -1.05 | 0.858 | -2.51 | 0.116 | -1.78 |
| 1418660_at   | Clock /// LOC62072 | circadian locomotor output cycles kaput /// hypothetical protein LOC620729         | -1.38 | 0.022 | -1.24 | 0.159 | -1.83 | 0.014 | -1.39 | 0.292 | -1.46 |
| 1433226_at   | 6330403N20Rik      | RIKEN cDNA 6330403N20 gene                                                         | -1.54 | 0.566 | -1.49 | 0.598 | -1.32 | 0.302 | -1.28 | 0.25  | -1.41 |
| 1429302_at   | Csnk2a2            | casein kinase 2, alpha prime polypeptide                                           | -1.29 | 0.193 | -1.38 | 0.079 | -1.73 | 0.086 | -1.16 | 0.045 | -1.39 |
| 1440271_at   | ---                | Transcribed locus                                                                  | -1.51 | 0.446 | -1.55 | 0.17  | -1.3  | 0.052 | -1.52 | 0.147 | -1.47 |
| 1459078_at   | Rbpms              | RNA binding protein gene with multiple splicing                                    | -1.36 | 0.357 | -1.25 | 0.43  | -1.83 | 0.013 | -1.68 | 0.462 | -1.53 |
| 1447038_x_at | Phip               | pleckstrin homology domain interacting protein                                     | -1.37 | 0.283 | -1.89 | 0.202 | -1.22 | 0.222 | -1.67 | 0.308 | -1.54 |
| 1447542_at   | AY702102           | cDNA sequence AY702102                                                             | -1.36 | 0.456 | -2.22 | 0.448 | -1.12 | 0.447 | -1.99 | 0.211 | -1.67 |

|              |               |                                                                               |       |       |       |       |       |       |       |       |       |
|--------------|---------------|-------------------------------------------------------------------------------|-------|-------|-------|-------|-------|-------|-------|-------|-------|
| 1431940_at   | LOC74457      | hypothetical protein LOC74457                                                 | -1.3  | 0.29  | -1.55 | 0.305 | -1.51 | 0.121 | -1.22 | 0.048 | -1.39 |
| 1419065_at   | 5730521E12Rik | RIKEN cDNA 5730521E12 gene                                                    | -1.27 | 0.353 | -1.03 | 0.847 | -3.15 | 0.05  | -1.44 | 0.515 | -1.72 |
| 1445135_at   | ---           | ---                                                                           | -1.02 | 0.988 | -2.9  | 0.153 | -1.34 | 0.428 | -1.5  | 0.635 | -1.69 |
| 1457386_at   | 9530010C24Rik | RIKEN cDNA 9530010C24 gene                                                    | -1.12 | 0.607 | -1.23 | 0.305 | -2.69 | 0.014 | -3.37 | 0.13  | -2.1  |
| 1451529_at   | Sgtb          | small glutamine-rich tetratricopeptide repeat (TPR)-containing, beta          | -1.67 | 0.094 | -1.39 | 0.311 | -1.31 | 0.026 | -3.08 | 0.243 | -1.86 |
| 1438900_at   | Sacm1l        | SAC1 (suppressor of actin mutations 1, homolog)-like (S. cerevisiae)          | -1.27 | 0.553 | -1.37 | 0.197 | -1.77 | 0.016 | -1.09 | 0.781 | -1.38 |
| 1433152_at   | 2900022B07Rik | RIKEN cDNA 2900022B07 gene                                                    | -1.77 | 0.472 | -1.24 | 0.634 | -1.42 | 0.701 | -1.42 | 0.59  | -1.46 |
| 1454649_at   | Srd5a1        | steroid 5 alpha-reductase 1                                                   | -1.18 | 0.438 | -2.27 | 0.008 | -1.26 | 0.53  | -1.63 | 0.21  | -1.59 |
| 1441787_at   | Zc3h12c       | Zinc finger CCCH-type containing 12C                                          | -1.19 | 0.56  | -2.55 | 0.114 | -1.18 | 0.591 | -1.3  | 0.56  | -1.56 |
| 1441267_at   | Rsrc1         | Arginine/serine-rich coiled-coil 1                                            | -1.74 | 0.33  | -1.19 | 0.192 | -1.51 | 0.4   | -2.74 | 0.102 | -1.79 |
| 1456132_x_at | Tsc22d1       | TSC22 domain family, member 1                                                 | -1.28 | 0.741 | -1.37 | 0.258 | -1.75 | 0.278 | -1.01 | 0.987 | -1.35 |
| 1458836_at   | Calb1         | calbindin-28K                                                                 | -1.5  | 0.227 | -1.47 | 0.622 | -1.36 | 0.264 | -1.26 | 0.698 | -1.4  |
| 1440947_at   | Bat2d         | BAT2 domain containing 1                                                      | -1.38 | 0.307 | -1.56 | 0.294 | -1.4  | 0.128 | -1.52 | 0.141 | -1.46 |
| 1449599_at   | ---           | ---                                                                           | -1.77 | 0.544 | -1.1  | 0.844 | -1.64 | 0.115 | -1.81 | 0.362 | -1.58 |
| 1436413_at   | Frk           | fyn-related kinase                                                            | -1.29 | 0.093 | -1.53 | 0.124 | -1.54 | 0.171 | -1.03 | 0.948 | -1.35 |
| 1432182_at   | 4922502B01Rik | RIKEN cDNA 4922502B01 gene                                                    | -1.25 | 0.781 | -1.47 | 0.156 | -1.67 | 0.546 | -1.14 | 0.768 | -1.38 |
| 1456341_a_at | Klf9          | Kruppel-like factor 9                                                         | -1.42 | 0.479 | -1.65 | 0.102 | -1.3  | 0.302 | -1.12 | 0.788 | -1.37 |
| 1432686_at   | 4833406M21Rik | RIKEN cDNA 4833406M21 gene                                                    | -1.43 | 0.097 | -1.1  | 0.806 | -2.11 | 0.016 | -1.2  | 0.232 | -1.46 |
| 1447328_at   | Itpr2         | Inositol 1,4,5-triphosphate receptor 2                                        | -1.12 | 0.692 | -1.74 | 0.164 | -1.63 | 0.184 | -1.35 | 0.436 | -1.46 |
| 1458691_at   | Synpo2l       | Synaptopodin 2-like                                                           | -1.41 | 0.488 | -1.73 | 0.378 | -1.26 | 0.623 | -1.83 | 0.068 | -1.56 |
| 1430955_at   | 2810403A07Rik | RIKEN cDNA 2810403A07 gene                                                    | -1.58 | 0.146 | -1.55 | 0.012 | -1.24 | 0.375 | -1.35 | 0.335 | -1.43 |
| 1451725_a_at | Psmid4        | proteasome (prosome, macropain) 26S subunit, non-ATPase, 4                    | -1.38 | 0.153 | -2.27 | 0.103 | -1.09 | 0.864 | -1.07 | 0.761 | -1.45 |
| 1435269_at   | 2510005D08Rik | RIKEN cDNA 2510005D08 gene                                                    | -1.05 | 0.871 | -2.19 | 0.223 | -1.47 | 0.593 | -1.16 | 0.829 | -1.47 |
| 1447595_x_at | 1810012K16Rik | RIKEN cDNA 1810012K16 gene                                                    | -1.68 | 0.262 | -1.18 | 0.719 | -1.57 | 0.429 | -1.61 | 0.508 | -1.51 |
| 1420212_at   | ---           | ---                                                                           | -1.16 | 0.796 | -1.55 | 0.372 | -1.73 | 0.28  | -3.22 | 0.15  | -1.92 |
| 1456973_at   | Arid5b        | AT rich interactive domain 5B (Mrf1 like)                                     | -1.21 | 0.202 | -1.34 | 0.219 | -1.94 | 0.001 | -1.79 | 0.114 | -1.57 |
| 1446127_at   | Zfx1a         | Zinc finger homeobox 1a                                                       | -1.1  | 0.576 | -1.51 | 0.199 | -1.97 | 0.047 | -1.37 | 0.444 | -1.49 |
| 1453331_at   | 1700013H16Rik | RIKEN cDNA 1700013H16 gene                                                    | -1.44 | 0.515 | -1.44 | 0.397 | -1.44 | 0.461 | -1.38 | 0.663 | -1.42 |
| 1437652_at   | Sema6c        | sema domain, transmembrane domain (TM), and cytoplasmic domain, (semapho      | -2.78 | 0.004 | -1.03 | 0.942 | -1.32 | 0.497 | -3.05 | 0.1   | -2.05 |
| 1440250_at   | Col4a4        | procollagen, type IV, alpha 4                                                 | -1.24 | 0.256 | -1.6  | 0.326 | -1.52 | 0.063 | -2.71 | 0.031 | -1.77 |
| 1427806_at   | ---           | ---                                                                           | -1.42 | 0.141 | -1.65 | 0.031 | -1.29 | 0.526 | -2.48 | 0.021 | -1.71 |
| 1444763_at   | Ptpkr         | protein tyrosine phosphatase, receptor type, K                                | -1.11 | 0.773 | -1.81 | 0.079 | -1.58 | 0.01  | -1.17 | 0.656 | -1.42 |
| 1448024_at   | Npr3          | natriuretic peptide receptor 3                                                | -1.25 | 0.497 | -2.38 | 0.007 | -1.16 | 0.462 | -2.08 | 0.166 | -1.72 |
| 1442778_at   | AA511254      | expressed sequence AA511254                                                   | -1.79 | 0.005 | -1.43 | 0.098 | -1.21 | 0.422 | -1.11 | 0.84  | -1.38 |
| 1454560_at   | 4930519N06Rik | RIKEN cDNA 4930519N06 gene                                                    | -1.02 | 0.958 | -2.69 | 0.175 | -1.35 | 0.441 | -1.28 | 0.722 | -1.59 |
| 1422048_at   | Trpc5         | transient receptor potential cation channel, subfamily C, member 5            | -1.8  | 0.212 | -1.43 | 0.303 | -1.21 | 0.471 | -1.13 | 0.694 | -1.39 |
| 1441799_at   | 6030422H21Rik | RIKEN cDNA 6030422H21 gene                                                    | -1.16 | 0.844 | -1.56 | 0.477 | -1.7  | 0.375 | -1.38 | 0.395 | -1.45 |
| 1442607_a_at | ---           | ---                                                                           | -1.36 | 0.196 | -1.19 | 0.424 | -1.95 | 0.075 | -1.54 | 0.392 | -1.51 |
| 1442821_at   | Tm9sf3        | Transmembrane 9 superfamily member 3                                          | -1.3  | 0.372 | -1.48 | 0.027 | -1.56 | 0.143 | -1.49 | 0.27  | -1.46 |
| 1445802_at   | AU017455      | Expressed sequence AU017455                                                   | -1.95 | 0.229 | -1.38 | 0.381 | -1.18 | 0.482 | -1.07 | 0.664 | -1.39 |
| 1435184_at   | Npr3          | natriuretic peptide receptor 3                                                | -1.28 | 0.408 | -1.5  | 0.262 | -1.57 | 0.253 | -1.59 | 0.278 | -1.48 |
| 1446006_at   | Immp1l        | IMP1 inner mitochondrial membrane peptidase-like (S. cerevisiae)              | -1.3  | 0.155 | -1.45 | 0.043 | -1.59 | 0.027 | -1.34 | 0.349 | -1.42 |
| 1431819_at   | ---           | ---                                                                           | -1.34 | 0.527 | -1.59 | 0.305 | -1.4  | 0.015 | -1.56 | 0.495 | -1.47 |
| 1438338_at   | Mdh1          | malate dehydrogenase 1, NAD (soluble)                                         | -1.23 | 0.305 | -1.84 | 0.022 | -1.36 | 0.047 | -1.72 | 0.147 | -1.54 |
| 1430415_at   | Phf6          | PHD finger protein 6                                                          | -1.22 | 0.591 | -1.62 | 0.051 | -1.53 | 0.009 | -1.5  | 0.154 | -1.47 |
| 1437071_at   | Eif1ay        | eukaryotic translation initiation factor 1A, Y-linked                         | -1.18 | 0.62  | -1.44 | 0.286 | -1.83 | 0.024 | -1.08 | 0.777 | -1.38 |
| 1430792_at   | ---           | ---                                                                           | -1.16 | 0.617 | -1.47 | 0.313 | -1.84 | 0.028 | -1.32 | 0.626 | -1.45 |
| 1438152_at   | Gpaa1         | GPI anchor attachment protein 1                                               | -3.13 | 0.021 | -1.12 | 0.557 | -1.15 | 0.491 | -1.14 | 0.806 | -1.63 |
| 1447268_at   | Nol12         | nucleolar protein 12                                                          | -1.8  | 0.123 | -1.35 | 0.515 | -1.26 | 0.396 | -1.45 | 0.551 | -1.47 |
| 1436650_at   | Filip1        | filamin A interacting protein 1                                               | -1.23 | 0.633 | -2.38 | 0.395 | -1.17 | 0.399 | -1.15 | 0.664 | -1.48 |
| 1434788_at   | D930050A07Rik | RIKEN cDNA D930050A07 gene                                                    | -1.32 | 0.013 | -1.53 | 0.513 | -1.48 | 0.017 | -1.13 | 0.544 | -1.36 |
| 1441738_at   | ---           | ---                                                                           | -2.03 | 0.062 | -1.46 | 0.237 | -1.1  | 0.737 | -1.01 | 0.946 | -1.4  |
| 1445598_at   | Galnt7        | UDP-N-acetyl-alpha-D-galactosamine: polypeptide N-acetylgalactosaminyltransfe | -1.06 | 0.658 | -2.01 | 0.123 | -1.55 | 0.457 | -1.35 | 0.489 | -1.49 |

|              |                   |                                                                                         |       |       |       |       |       |       |       |       |       |
|--------------|-------------------|-----------------------------------------------------------------------------------------|-------|-------|-------|-------|-------|-------|-------|-------|-------|
| 1446672_at   | ---               | ---                                                                                     | -1.33 | 0.798 | -1.39 | 0.505 | -1.62 | 0.303 | -1.34 | 0.588 | -1.42 |
| 1450784_at   | Reck              | reversion-inducing-cysteine-rich protein with kazal motifs                              | -1.11 | 0.384 | -1.81 | 0.054 | -1.58 | 0.015 | -1    | 0.993 | -1.37 |
| 1452989_at   | 2900009J20Rik     | RIKEN cDNA 2900009J20 gene                                                              | -1.23 | 0.151 | -1.28 | 0.355 | -2.02 | 0.016 | -1.69 | 0.167 | -1.56 |
| 1447062_at   | Vps24             | Vacuolar protein sorting 24 (yeast)                                                     | -1.15 | 0.302 | -1.42 | 0.024 | -1.93 | 0.131 | -1.12 | 0.484 | -1.4  |
| 1458134_at   | Gstz1             | Glutathione transferase zeta 1 (maleylacetate isomerase)                                | -1.47 | 0.237 | -1.63 | 0.157 | -1.26 | 0.024 | -1.27 | 0.412 | -1.41 |
| 1446069_at   | Ablim3            | Actin binding LIM protein family, member 3                                              | -1.06 | 0.855 | -2.55 | 0.002 | -1.33 | 0.109 | -1.06 | 0.591 | -1.5  |
| 1446464_at   | Psme4             | Proteasome (prosome, macropain) activator subunit 4                                     | -1.09 | 0.617 | -1.3  | 0.182 | -2.46 | 0.033 | -1.14 | 0.438 | -1.5  |
| 1446609_at   | ---               | ---                                                                                     | -1.07 | 0.832 | -1.51 | 0.124 | -2.01 | 0.049 | -1.37 | 0.421 | -1.49 |
| 1441287_at   | ---               | ---                                                                                     | -1.03 | 0.897 | -3.71 | 0.019 | -1.17 | 0.599 | -1.15 | 0.136 | -1.77 |
| 1443094_at   | BB031773          | expressed sequence BB031773                                                             | -1.21 | 0.109 | -2.58 | 0.253 | -1.14 | 0.238 | -2.28 | 0.471 | -1.8  |
| 1430008_x_at | Speer5-ps1        | spermatogenesis associated glutamate (E)-rich protein 5, pseudogene 1                   | -1.01 | 0.99  | -2.81 | 0.104 | -1.34 | 0.542 | -1.31 | 0.671 | -1.62 |
| 1437971_at   | Skiv2l2           | Superkiller viralicidic activity 2-like 2 (S. cerevisiae)                               | -2.7  | 0.347 | -1.09 | 0.767 | -1.25 | 0.388 | -1.14 | 0.799 | -1.54 |
| 1438831_at   | Crks              | Cdc2-related kinase, arginine/serine-rich                                               | -1.15 | 0.138 | -1.47 | 0.105 | -1.83 | 0.013 | -1.23 | 0.178 | -1.42 |
| 1442613_at   | ---               | ---                                                                                     | -1.3  | 0.15  | -1.99 | 0.183 | -1.22 | 0.304 | -1.38 | 0.128 | -1.47 |
| 1421538_at   | Kcnd1             | potassium voltage-gated channel, Shal-related family, member 1                          | -1.25 | 0.629 | -1.46 | 0.427 | -1.64 | 0.244 | -1.39 | 0.086 | -1.43 |
| 1442168_at   | A230071A22Rik     | RIKEN cDNA A230071A22 gene                                                              | -1.45 | 0.46  | -1.22 | 0.473 | -1.71 | 0.031 | -1.45 | 0.149 | -1.46 |
| 1441633_at   | Nudt9             | Nudix (nucleoside diphosphate linked moiety X)-type motif 9                             | -1.07 | 0.869 | -1.44 | 0.512 | -2.13 | 0.018 | -1.43 | 0.464 | -1.52 |
| 1433431_at   | Pnlip             | pancreatic lipase                                                                       | -1.35 | 0.585 | -1.95 | 0.237 | -1.19 | 0.694 | -2.39 | 0.152 | -1.72 |
| 1421393_at   | Grin2d            | glutamate receptor, ionotropic, NMDA2D (epsilon 4)                                      | -1.98 | 0.3   | -1.05 | 0.83  | -1.56 | 0.236 | -1.48 | 0.52  | -1.52 |
| 1431492_at   | 2210418G03Rik     | RIKEN cDNA 2210418G03 gene                                                              | -2.03 | 0.101 | -1.16 | 0.63  | -1.35 | 0.513 | -1.05 | 0.905 | -1.4  |
| 1418745_at   | Omd               | osteomodulin                                                                            | -1.58 | 0.532 | -1.33 | 0.634 | -1.41 | 0.237 | -2.22 | 0.303 | -1.63 |
| 1432105_at   | Sirt5             | sirtuin 5 (silent mating type information regulation 2 homolog) 5 (S. cerevisiae)       | -1.61 | 0.514 | -1.93 | 0.357 | -1.04 | 0.953 | -1.3  | 0.175 | -1.47 |
| 1459338_at   | Auts2             | Autism susceptibility candidate 2                                                       | -1.18 | 0.613 | -1.56 | 0.187 | -1.65 | 0.113 | -1.73 | 0.112 | -1.53 |
| 1459170_at   | Foxo1             | Forkhead box O1                                                                         | -1.2  | 0.659 | -1.31 | 0.387 | -1.99 | 0.018 | -2.39 | 0.093 | -1.72 |
| 1450349_at   | Stx1b1            | syntaxin 1B1                                                                            | -1.36 | 0.434 | -1.27 | 0.402 | -1.74 | 0.446 | -1.29 | 0.577 | -1.41 |
| 1453217_at   | LOC625508 /// LOC | similar to Xlr-related, meiosis regulated /// similar to Xlr-related, meiosis regulated | -2.13 | 0.179 | -1.58 | 0.479 | -1.01 | 0.991 | -2.11 | 0.169 | -1.71 |
| 1431960_at   | Wwox              | WW domain-containing oxidoreductase                                                     | -1.18 | 0.117 | -1.45 | 0.056 | -1.79 | 0.022 | -1.04 | 0.791 | -1.36 |
| 1458386_at   | C030009J22Rik     | RIKEN cDNA C030009J22 gene                                                              | -1.5  | 0.446 | -1.68 | 0.106 | -1.2  | 0.057 | -1.3  | 0.657 | -1.42 |
| 1445820_at   | ---               | ---                                                                                     | -1.37 | 0.238 | -1.51 | 0.039 | -1.41 | 0.528 | -1.77 | 0.023 | -1.52 |
| 1458065_at   | ---               | ---                                                                                     | -1.38 | 0.147 | -1.25 | 0.512 | -1.75 | 0.145 | -1.68 | 0.1   | -1.51 |
| 1446105_at   | Exoc1             | exocyst complex component 1                                                             | -1.69 | 0.539 | -1.37 | 0.01  | -1.29 | 0.588 | -1.88 | 0.345 | -1.56 |
| 1421599_at   | Hs6st3            | heparan sulfate 6-O-sulfotransferase 3                                                  | -1.69 | 0.457 | -1.48 | 0.018 | -1.2  | 0.448 | -1.01 | 0.934 | -1.35 |
| 1449109_at   | Socs2             | suppressor of cytokine signaling 2                                                      | -1.03 | 0.955 | -2.56 | 0.182 | -1.35 | 0.007 | -1.28 | 0.197 | -1.56 |
| 1442991_at   | B3gat2            | beta-1,3-glucuronyltransferase 2 (glucuronosyltransferase S)                            | -1.04 | 0.929 | -1.69 | 0.498 | -1.84 | 0.308 | -1.13 | 0.732 | -1.42 |
| 1426215_at   | Ddc               | dopa decarboxylase                                                                      | -1.11 | 0.624 | -1.26 | 0.374 | -2.45 | 0     | -1.53 | 0.216 | -1.59 |
| 1430890_at   | 2210010C17Rik     | RIKEN cDNA 2210010C17 gene                                                              | -2.01 | 0.322 | -1.52 | 0.089 | -1.06 | 0.781 | -3.77 | 0.014 | -2.09 |
| 1442090_at   | 8030463A06Rik     | RIKEN cDNA 8030463A06 gene                                                              | -1.97 | 0.502 | -1.23 | 0.623 | -1.28 | 0.617 | -1.14 | 0.625 | -1.4  |
| 1437880_at   | Lbxcor1           | ladybird homeobox 1 homolog (Drosophila) corepressor 1                                  | -1.18 | 0.821 | -1.48 | 0.52  | -1.73 | 0.2   | -1.02 | 0.942 | -1.35 |
| 1446348_at   | Map4k5            | Mitogen-activated protein kinase kinase kinase kinase 5                                 | -1.21 | 0.329 | -2.08 | 0.08  | -1.26 | 0.433 | -1.35 | 0.113 | -1.48 |
| 1441217_at   | Rabgap1           | RAB GTPase activating protein 1                                                         | -1.31 | 0.13  | -1.28 | 0.597 | -1.79 | 0.022 | -1.06 | 0.772 | -1.36 |
| 1447051_at   | Rnf43             | Ring finger protein 43                                                                  | -1.17 | 0.836 | -1.53 | 0.199 | -1.68 | 0.462 | -1.03 | 0.954 | -1.35 |
| 1440513_at   | C80258            | expressed sequence C80258                                                               | -1.29 | 0.033 | -1.28 | 0.166 | -1.83 | 0.047 | -1.29 | 0.057 | -1.42 |
| 1454884_at   | Btbd4             | BTB (POZ) domain containing 4                                                           | -1.91 | 0.038 | -1.24 | 0.277 | -1.29 | 0.335 | -1.5  | 0.038 | -1.49 |
| 1444453_at   | Trp53rk           | Trp53 regulating kinase                                                                 | -1.08 | 0.724 | -1.68 | 0.049 | -1.71 | 0.323 | -3.09 | 0.069 | -1.89 |
| 1459314_at   | Cdkal1            | CDK5 regulatory subunit associated protein 1-like 1                                     | -1.64 | 0.248 | -1.12 | 0.694 | -1.67 | 0.143 | -1.11 | 0.841 | -1.38 |
| 1457360_at   | Cfdp1             | Craniofacial development protein 1                                                      | -1.04 | 0.689 | -1.58 | 0.051 | -1.98 | 0.02  | -1.12 | 0.763 | -1.43 |
| 1417595_at   | Meox1             | mesenchyme homeobox 1                                                                   | -1.38 | 0.16  | -1.12 | 0.861 | -2.07 | 0.029 | -1.25 | 0.743 | -1.45 |
| 1423004_at   | Vipr1             | vasoactive intestinal peptide receptor 1                                                | -1.08 | 0.449 | -2.61 | 0.358 | -1.26 | 0.579 | -1.96 | 0.528 | -1.73 |
| 1459572_at   | C86371            | expressed sequence C86371                                                               | -1.32 | 0.735 | -1.11 | 0.766 | -2.25 | 0.195 | -1.34 | 0.562 | -1.5  |
| 1457230_at   | Gnpda2            | glucosamine-6-phosphate deaminase 2                                                     | -1.34 | 0.135 | -1.82 | 0.319 | -1.23 | 0.457 | -1.29 | 0.248 | -1.42 |
| 1454069_at   | 9030409C19Rik     | RIKEN cDNA 9030409C19 gene                                                              | -2.07 | 0.053 | -1.03 | 0.933 | -1.54 | 0.189 | -1.27 | 0.606 | -1.48 |
| 1416710_at   | Tmem35            | transmembrane protein 35                                                                | -1.35 | 0.013 | -1.77 | 0.358 | -1.25 | 0.634 | -1.14 | 0.62  | -1.38 |
| 1432687_at   | 4833406M21Rik     | RIKEN cDNA 4833406M21 gene                                                              | -1.49 | 0.532 | -1.37 | 0.354 | -1.42 | 0.244 | -1.51 | 0.148 | -1.45 |

|              |                                                                                                                |                                                                                             |       |       |       |       |       |       |       |       |       |
|--------------|----------------------------------------------------------------------------------------------------------------|---------------------------------------------------------------------------------------------|-------|-------|-------|-------|-------|-------|-------|-------|-------|
| 1456451_at   | Ceacam15                                                                                                       | CEA-related cell adhesion molecule 15                                                       | -1.43 | 0.253 | -1.37 | 0.502 | -1.48 | 0.426 | -1.14 | 0.482 | -1.35 |
| 1453606_at   | 4931403G20Rik                                                                                                  | RIKEN cDNA 4931403G20 gene                                                                  | -1.19 | 0.069 | -1.31 | 0.253 | -1.99 | 0.359 | -1.48 | 0.193 | -1.49 |
| 1455635_at   | ---                                                                                                            | Transcribed locus                                                                           | -1.2  | 0.626 | -1.96 | 0.071 | -1.31 | 0.268 | -1.27 | 0.639 | -1.44 |
| 1443231_at   | Magi1                                                                                                          | Membrane associated guanylate kinase, WW and PDZ domain containing 1                        | -1.19 | 0.464 | -1.27 | 0.017 | -2.09 | 0.015 | -1.23 | 0.203 | -1.45 |
| 1457752_at   | AU014876                                                                                                       | expressed sequence AU014876                                                                 | -1.15 | 0.663 | -2.03 | 0.247 | -1.35 | 0.018 | -2.17 | 0.352 | -1.67 |
| 1457548_at   | Adamts6                                                                                                        | A disintegrin-like and metallopeptidase (reprolysin type) with thrombospondin type 1 motifs | -1.76 | 0.152 | -1.41 | 0.542 | -1.2  | 0.497 | -1.63 | 0.207 | -1.5  |
| 1441231_at   | ---                                                                                                            | PREDICTED: Mus musculus hypothetical protein LOC626097 (LOC626097), mR                      | -1.24 | 0.069 | -1.28 | 0.519 | -1.93 | 0.074 | -1.53 | 0.226 | -1.49 |
| 1424211_at   | 5730438N18Rik                                                                                                  | RIKEN cDNA 5730438N18 gene                                                                  | -1.75 | 0.424 | -1.44 | 0.283 | -1.19 | 0.454 | -1.21 | 0.065 | -1.4  |
| 1419698_at   | Cxcl11                                                                                                         | chemokine (C-X-C motif) ligand 11                                                           | -1.83 | 0.273 | -1.51 | 0.11  | -1.11 | 0.546 | -1.19 | 0.468 | -1.41 |
| 1445022_at   | ---                                                                                                            | Transcribed locus                                                                           | -1.19 | 0.653 | -1.85 | 0.311 | -1.38 | 0.591 | -1.02 | 0.954 | -1.36 |
| 1458814_at   | AU022855                                                                                                       | expressed sequence AU022855                                                                 | -1.1  | 0.475 | -2.01 | 0.037 | -1.42 | 0.103 | -1.24 | 0.483 | -1.44 |
| 1439596_at   | ---                                                                                                            | ---                                                                                         | -1.28 | 0.399 | -1.63 | 0.113 | -1.4  | 0.026 | -1.91 | 0.175 | -1.55 |
| 1458124_at   | Iqgap1                                                                                                         | IQ motif containing GTPase activating protein 1                                             | -1.39 | 0.215 | -1.29 | 0.544 | -1.64 | 0.25  | -1.44 | 0.032 | -1.44 |
| 1427029_at   | Htra3                                                                                                          | HtrA serine peptidase 3                                                                     | -2.4  | 0.217 | -1.1  | 0.847 | -1.28 | 0.468 | -1.49 | 0.083 | -1.57 |
| 1435832_at   | Lrrc4                                                                                                          | leucine rich repeat containing 4                                                            | -1.34 | 0.588 | -1.86 | 0.141 | -1.21 | 0.528 | -1.31 | 0.661 | -1.43 |
| 1425077_at   | Dnajc18                                                                                                        | DnaJ (Hsp40) homolog, subfamily C, member 18                                                | -1.32 | 0.088 | -1.46 | 0.138 | -1.5  | 0.13  | -1.02 | 0.949 | -1.33 |
| 1420218_at   | ---                                                                                                            | ---                                                                                         | -1.13 | 0.597 | -1.39 | 0.371 | -1.99 | 0.015 | -2.13 | 0.218 | -1.66 |
| 1430306_a_at | Atp6v1c2                                                                                                       | ATPase, H+ transporting, lysosomal V1 subunit C2                                            | -1.42 | 0.078 | -1.49 | 0.555 | -1.36 | 0.135 | -1.91 | 0.086 | -1.55 |
| 1443595_at   | Cnot6l                                                                                                         | CCR4-NOT transcription complex, subunit 6-like                                              | -1.08 | 0.773 | -1.79 | 0.02  | -1.6  | 0.215 | -1.12 | 0.856 | -1.4  |
| 1446290_at   | 2410129H14Rik                                                                                                  | RIKEN cDNA 2410129H14 gene                                                                  | -1.19 | 0.588 | -1.38 | 0.431 | -1.85 | 0.115 | -1.18 | 0.317 | -1.4  |
| 1452875_at   | Hddc3                                                                                                          | HD domain containing 3                                                                      | -1.26 | 0.607 | -2.33 | 0.145 | -1.13 | 0.639 | -1.49 | 0.123 | -1.55 |
| 1430923_at   | 2610300M13Rik                                                                                                  | RIKEN cDNA 2610300M13 gene                                                                  | -1.14 | 0.71  | -2.13 | 0.237 | -1.31 | 0.569 | -1.13 | 0.837 | -1.43 |
| 1458748_at   | Rbm27                                                                                                          | RNA binding motif protein 27                                                                | -1.05 | 0.745 | -2.1  | 0.006 | -1.47 | 0.101 | -1.17 | 0.449 | -1.45 |
| 1445370_at   | Vapb                                                                                                           | Vesicle-associated membrane protein, associated protein B and C                             | -1.24 | 0.196 | -1.41 | 0.572 | -1.68 | 0.057 | -2    | 0.078 | -1.58 |
| 1445770_at   | ---                                                                                                            | ---                                                                                         | -2.1  | 0.2   | -1.18 | 0.735 | -1.26 | 0.214 | -1.75 | 0.392 | -1.57 |
| 1432107_at   | 2310010M20Rik                                                                                                  | RIKEN cDNA 2310010M20 gene                                                                  | -1.83 | 0.169 | -1.42 | 0.635 | -1.16 | 0.596 | -1.33 | 0.589 | -1.44 |
| 1454212_x_at | Gsdmdc2 /// 49334: gasdermin domain containing 2 /// RIKEN cDNA 4933426G20 gene /// RIKEN cDNA 4933426G20 gene |                                                                                             | -1.4  | 0.674 | -1.74 | 0.517 | -1.21 | 0.151 | -1.9  | 0.155 | -1.56 |
| 1419391_at   | Myog                                                                                                           | myogenin                                                                                    | -1.44 | 0.441 | -1.8  | 0.52  | -1.16 | 0.778 | -1.36 | 0.414 | -1.44 |
| 1442845_at   | C130075A20Rik                                                                                                  | RIKEN cDNA C130075A20 gene                                                                  | -1.21 | 0.117 | -1.03 | 0.82  | -3.16 | 0.009 | -1.4  | 0.077 | -1.7  |
| 1420067_at   | Cd160                                                                                                          | CD160 antigen                                                                               | -1.91 | 0.41  | -1.04 | 0.89  | -1.59 | 0.038 | -1.46 | 0.51  | -1.5  |
| 1456124_x_at | Svs5                                                                                                           | seminal vesicle secretion 5                                                                 | -3.17 | 0.001 | -1.17 | 0.762 | -1.06 | 0.894 | -1.38 | 0.609 | -1.7  |
| 1458050_at   | ---                                                                                                            | ---                                                                                         | -1.12 | 0.844 | -2.88 | 0.01  | -1.14 | 0.475 | -1.41 | 0.165 | -1.64 |
| 1436392_s_at | Tcfap2c                                                                                                        | transcription factor AP-2, gamma                                                            | -1.48 | 0.281 | -1.46 | 0.167 | -1.33 | 0.308 | -1.34 | 0.596 | -1.4  |
| 1440540_at   | Gle1l                                                                                                          | GLE1 RNA export mediator-like (yeast)                                                       | -1.21 | 0.589 | -1.47 | 0.342 | -1.65 | 0.052 | -1.22 | 0.387 | -1.39 |
| 1456816_at   | Rai17                                                                                                          | Retinoic acid induced 17                                                                    | -1.49 | 0.28  | -1.43 | 0.241 | -1.35 | 0.287 | -1.5  | 0.232 | -1.44 |
| 1425935_at   | 2900042B11Rik                                                                                                  | RIKEN cDNA 2900042B11 gene                                                                  | -1.14 | 0.714 | -3.01 | 0.114 | -1.1  | 0.531 | -1.27 | 0.284 | -1.63 |
| 1430277_at   | 9430034F23Rik                                                                                                  | RIKEN cDNA 9430034F23 gene                                                                  | -1.17 | 0.493 | -1.6  | 0.405 | -1.58 | 0.093 | -1.21 | 0.479 | -1.39 |
| 1456050_at   | C80998                                                                                                         | expressed sequence C80998                                                                   | -1.22 | 0.427 | -1.27 | 0.385 | -1.99 | 0.058 | -1.06 | 0.523 | -1.38 |
| 1435656_at   | Gmps                                                                                                           | guanine monphosphate synthetase                                                             | -1.25 | 0.425 | -1.38 | 0.019 | -1.7  | 0.12  | -1.17 | 0.113 | -1.37 |
| 1416505_at   | Nr4a1                                                                                                          | nuclear receptor subfamily 4, group A, member 1                                             | -1.92 | 0.057 | -1.17 | 0.409 | -1.36 | 0.506 | -1.93 | 0.154 | -1.59 |
| 1453841_at   | 2310050P20Rik                                                                                                  | RIKEN cDNA 2310050P20 gene                                                                  | -1.34 | 0.688 | -1.1  | 0.782 | -2.17 | 0.095 | -2.01 | 0.11  | -1.66 |
| 1432375_a_at | Spata3                                                                                                         | spermatogenesis associated 3                                                                | -1.05 | 0.961 | -1.12 | 0.601 | -3.74 | 0.119 | -1.6  | 0.153 | -1.88 |
| 1440693_at   | Palld                                                                                                          | palladin, cytoskeletal associated protein                                                   | -1.01 | 0.963 | -1.65 | 0.254 | -1.92 | 0.083 | -1.05 | 0.923 | -1.41 |
| 1447464_at   | Anks1b                                                                                                         | ankyrin repeat and sterile alpha motif domain containing 1B                                 | -1.19 | 0.697 | -2.71 | 0.01  | -1.1  | 0.805 | -1.07 | 0.721 | -1.52 |
| 1443770_x_at | Auts2                                                                                                          | Autism susceptibility candidate 2                                                           | -1.3  | 0.243 | -1.21 | 0.789 | -1.92 | 0.177 | -1.07 | 0.617 | -1.38 |
| 1453598_at   | 3110082D06Rik                                                                                                  | RIKEN cDNA 3110082D06 gene                                                                  | -2.13 | 0.438 | -1.22 | 0.449 | -1.21 | 0.731 | -1.08 | 0.595 | -1.41 |
| 1454348_at   | 4933407C09Rik                                                                                                  | RIKEN cDNA 4933407C09 gene                                                                  | -2.16 | 0.117 | -1.24 | 0.058 | -1.18 | 0.714 | -1.3  | 0.756 | -1.47 |
| 1433035_at   | 5430430K15Rik                                                                                                  | RIKEN cDNA 5430430K15 gene                                                                  | -1.29 | 0.564 | -1.74 | 0.181 | -1.3  | 0.677 | -1.59 | 0.236 | -1.48 |
| 1433410_at   | C030014O09Rik                                                                                                  | RIKEN cDNA C030014O09 gene                                                                  | -1.57 | 0.412 | -1.14 | 0.841 | -1.66 | 0.209 | -1.67 | 0.418 | -1.51 |
| 1441082_at   | Dscam                                                                                                          | Down syndrome cell adhesion molecule                                                        | -1.36 | 0.116 | -1.86 | 0.086 | -1.18 | 0.674 | -1.91 | 0.39  | -1.58 |
| 1447202_at   | 1200009F10Rik                                                                                                  | RIKEN cDNA 1200009F10 gene                                                                  | -1.6  | 0.359 | -1.4  | 0.438 | -1.28 | 0.162 | -1.19 | 0.462 | -1.37 |
| 1447167_at   | AL033314                                                                                                       | Expressed sequence AL033314                                                                 | -1.33 | 0.327 | -1.2  | 0.363 | -1.87 | 0.031 | -1.36 | 0.237 | -1.44 |
| 1447820_x_at | Cpt2                                                                                                           | carnitine palmitoyltransferase 2                                                            | -1.59 | 0.156 | -1.24 | 0.52  | -1.46 | 0.118 | -1.08 | 0.661 | -1.34 |

|              |                    |                                                                                    |       |       |       |       |       |       |       |       |       |
|--------------|--------------------|------------------------------------------------------------------------------------|-------|-------|-------|-------|-------|-------|-------|-------|-------|
| 1437957_at   | 7030407O06Rik      | RIKEN cDNA 7030407O06 gene                                                         | -1.29 | 0.053 | -1.5  | 0.24  | -1.48 | 0.178 | -1.1  | 0.645 | -1.34 |
| 1430828_at   | Trmu               | tRNA 5-methylaminomethyl-2-thiouridylate methyltransferase                         | -1.26 | 0.478 | -1.79 | 0.483 | -1.31 | 0.526 | -1.67 | 0.155 | -1.51 |
| 1456782_at   | Tada1l             | transcriptional adaptor 1 (HF11 homolog, yeast) like                               | -1.32 | 0.146 | -2.07 | 0.018 | -1.14 | 0.426 | -1    | 0.989 | -1.38 |
| 1455610_at   | Dmn                | desmuslin                                                                          | -1.09 | 0.765 | -1.87 | 0.139 | -1.51 | 0.087 | -1.22 | 0.105 | -1.42 |
| 1452477_at   | 3110057O12Rik      | RIKEN cDNA 3110057O12 gene                                                         | -1.52 | 0.14  | -1.19 | 0.682 | -1.61 | 0.192 | -1    | 0.998 | -1.33 |
| 1460108_at   | Trit1              | TRNA isopentenyltransferase 1                                                      | -1.3  | 0.597 | -1.35 | 0.357 | -1.64 | 0.191 | -1.04 | 0.931 | -1.33 |
| 1438590_at   | Rapgef3            | Rap guanine nucleotide exchange factor (GEF) 3                                     | -1.24 | 0.258 | -1.63 | 0.139 | -1.42 | 0.325 | -1.34 | 0.289 | -1.41 |
| 1440802_at   | Clasp2             | CLIP associating protein 2                                                         | -1.29 | 0.503 | -1.31 | 0.327 | -1.71 | 0.019 | -1.39 | 0.24  | -1.43 |
| 1457567_at   | Nagk               | N-acetylglucosamine kinase                                                         | -1.5  | 0.041 | -1.53 | 0.008 | -1.25 | 0.26  | -1.03 | 0.887 | -1.33 |
| 1437744_at   | Slitrk4            | SLIT and NTRK-like family, member 4                                                | -1.99 | 0.203 | -1.54 | 0.2   | -1.03 | 0.921 | -1.25 | 0.754 | -1.45 |
| 1445637_at   | Dnmt1              | DNA methyltransferase (cytosine-5) 1                                               | -2.73 | 0.357 | -1.23 | 0.772 | -1.06 | 0.931 | -1.28 | 0.733 | -1.57 |
| 1431697_at   | Synj2              | synaptojanin 2                                                                     | -2.64 | 0.03  | -1.2  | 0.516 | -1.1  | 0.698 | -1.03 | 0.891 | -1.49 |
| 1443020_at   | Hmbox1             | Homeobox containing 1                                                              | -1.37 | 0.012 | -1.15 | 0.585 | -1.91 | 0.052 | -1.15 | 0.362 | -1.4  |
| 1455281_at   | Wdr33              | WD repeat domain 33                                                                | -1.2  | 0.338 | -1.51 | 0.153 | -1.59 | 0.025 | -1.29 | 0.352 | -1.4  |
| 1454257_at   | Sptlc2             | serine palmitoyltransferase, long chain base subunit 2                             | -1.33 | 0.413 | -1.25 | 0.512 | -1.77 | 0.083 | -1.11 | 0.31  | -1.36 |
| 1453456_at   | 2900084O13Rik      | RIKEN cDNA 2900084O13 gene                                                         | -1.18 | 0.759 | -1.23 | 0.606 | -2.16 | 0.01  | -2.38 | 0.167 | -1.74 |
| 1459074_at   | ---                | ---                                                                                | -1.67 | 0.352 | -1    | 0.99  | -1.9  | 0.316 | -2.6  | 0.094 | -1.79 |
| 1444377_at   | Psbmb2             | Proteasome (prosome, macropain) subunit, beta type 2                               | -1.41 | 0.258 | -1.42 | 0.103 | -1.42 | 0.405 | -1.51 | 0.124 | -1.44 |
| 1456783_at   | 9330107J05Rik      | RIKEN cDNA 9330107J05 gene                                                         | -1.22 | 0.044 | -1.28 | 0.119 | -1.93 | 0.06  | -3.19 | 0.085 | -1.9  |
| 1459444_at   | Zfp91              | zinc finger protein 91                                                             | -1.52 | 0.029 | -1.14 | 0.785 | -1.71 | 0.017 | -1.6  | 0.012 | -1.49 |
| 1439833_at   | 3-Sep              | septin 3                                                                           | -1.51 | 0.336 | -1.01 | 0.977 | -2.11 | 0.013 | -1.02 | 0.884 | -1.41 |
| 1457247_at   | Al465495           | expressed sequence Al465495                                                        | -1.74 | 0.147 | -1.32 | 0.568 | -1.26 | 0.119 | -1.18 | 0.687 | -1.38 |
| 1436067_at   | Zbtb10 /// LOC6696 | zinc finger and BTB domain containing 10 /// similar to zinc finger and BTB domain | -1.2  | 0.173 | -1.66 | 0.065 | -1.46 | 0.078 | -1.99 | 0.079 | -1.57 |
| 1447736_at   | Fkbp5              | FK506 binding protein 5                                                            | -1.04 | 0.82  | -1.59 | 0.526 | -1.88 | 0.298 | -1.22 | 0.838 | -1.43 |
| 1441771_at   | Atrx               | Alpha thalassemia/mental retardation syndrome X-linked homolog (human)             | -1.2  | 0.53  | -1.38 | 0.171 | -1.77 | 0.065 | -1.11 | 0.727 | -1.36 |
| 1441608_at   | Cacna2d1           | Calcium channel, voltage-dependent, alpha2/delta subunit 1                         | -1.11 | 0.903 | -2.24 | 0.129 | -1.28 | 0.383 | -1.09 | 0.804 | -1.43 |
| 1454138_a_at | Stk31              | serine threonine kinase 31                                                         | -1.14 | 0.757 | -2.9  | 0.04  | -1.11 | 0.471 | -2.04 | 0.416 | -1.8  |
| 1418189_s_at | Malat1             | Metastasis associated lung adenocarcinoma transcript 1 (non-coding RNA)            | -1.17 | 0.582 | -1.63 | 0.15  | -1.51 | 0.057 | -1.41 | 0.248 | -1.43 |
| 1417803_at   | 1110032A04Rik      | RIKEN cDNA 1110032A04 gene                                                         | -1.52 | 0.066 | -1.26 | 0.639 | -1.48 | 0.151 | -2.24 | 0.099 | -1.63 |
| 1457199_at   | ---                | ---                                                                                | -1.12 | 0.554 | -1.68 | 0.102 | -1.57 | 0.014 | -1.19 | 0.285 | -1.39 |
| 1446485_at   | 4930553C11Rik      | RIKEN cDNA 4930553C11 gene                                                         | -1.12 | 0.821 | -1.83 | 0.18  | -1.46 | 0.513 | -1.22 | 0.51  | -1.41 |
| 1458497_at   | Crim1              | Cysteine rich transmembrane BMP regulator 1 (chordin like)                         | -1.2  | 0.023 | -1.31 | 0.24  | -1.89 | 0.014 | -1.36 | 0.058 | -1.44 |
| 1442401_at   | Sorbs1             | Sorbin and SH3 domain containing 1                                                 | -1.62 | 0.464 | -1.29 | 0.454 | -1.37 | 0.517 | -1.73 | 0.199 | -1.5  |
| 1445347_at   | ---                | ---                                                                                | -1.03 | 0.93  | -1.65 | 0.411 | -1.82 | 0.28  | -4.26 | 0.212 | -2.19 |
| 1455846_at   | Aqp11              | aquaporin 11                                                                       | -3.32 | 0.08  | -1.09 | 0.756 | -1.1  | 0.741 | -1.27 | 0.672 | -1.7  |
| 1443622_at   | Dscr3              | Down syndrome critical region gene 3                                               | -1.93 | 0.575 | -1.15 | 0.76  | -1.35 | 0.173 | -1.19 | 0.678 | -1.41 |
| 1447426_at   | Dip3b              | Dip3 beta                                                                          | -1.21 | 0.422 | -1.24 | 0.418 | -2.03 | 0.054 | -1.25 | 0.343 | -1.43 |
| 1427142_s_at | Jarid1b            | jumonji, AT rich interactive domain 1B (Rbp2 like)                                 | -1.39 | 0.155 | -1.44 | 0.02  | -1.41 | 0.051 | -1.07 | 0.524 | -1.33 |
| 1454377_at   | 2700080J24Rik      | RIKEN cDNA 2700080J24 gene                                                         | -1.92 | 0.031 | -1.18 | 0.485 | -1.31 | 0.024 | -1.06 | 0.801 | -1.37 |
| 1427403_at   | Slco1a5            | solute carrier organic anion transporter family, member 1a5                        | -1.19 | 0.775 | -2.03 | 0.455 | -1.26 | 0.63  | -1.28 | 0.69  | -1.44 |
| 1439801_at   | Sunc1              | Sad1 and UNC84 domain containing 1                                                 | -1.16 | 0.674 | -1.81 | 0.189 | -1.41 | 0.5   | -1.73 | 0.361 | -1.52 |
| 1429333_at   | Kif2b              | kinesin family member 2B                                                           | -4.06 | 0.084 | -1.08 | 0.798 | -1.05 | 0.883 | -1.16 | 0.872 | -1.84 |
| 1419881_x_at | ---                | ---                                                                                | -1.18 | 0.57  | -1.19 | 0.825 | -2.25 | 0.134 | -1.27 | 0.761 | -1.47 |
| 1440683_at   | A930004D18Rik      | RIKEN cDNA A930004D18 gene                                                         | -1.27 | 0.689 | -1.54 | 0.279 | -1.44 | 0.368 | -1.05 | 0.838 | -1.33 |
| 1430341_at   | Nudt5              | nudix (nucleoside diphosphate linked moiety X)-type motif 5                        | -1.3  | 0.073 | -1.75 | 0.006 | -1.27 | 0.275 | -1.11 | 0.395 | -1.36 |
| 1455361_at   | Dgkb               | diacylglycerol kinase, beta                                                        | -1.25 | 0.247 | -1.3  | 0.36  | -1.78 | 0.039 | -1.85 | 0.385 | -1.55 |
| 1446703_at   | Rfwd2              | Ring finger and WD repeat domain 2                                                 | -1.53 | 0.531 | -1.26 | 0.637 | -1.47 | 0.406 | -1.05 | 0.935 | -1.33 |
| 1456413_at   | Pde4dip            | phosphodiesterase 4D interacting protein (myomegalin)                              | -1.32 | 0.277 | -1.35 | 0.152 | -1.58 | 0.163 | -1.72 | 0.117 | -1.49 |
| 1447116_at   | Parl               | Presenilin associated, rhomboid-like                                               | -1.42 | 0.439 | -1.95 | 0.076 | -1.09 | 0.758 | -3.27 | 0.029 | -1.94 |
| 1436373_at   | Map3k10            | mitogen activated protein kinase kinase 10                                         | -1.6  | 0.591 | -1.4  | 0.441 | -1.26 | 0.475 | -2.08 | 0.113 | -1.59 |
| 1458096_at   | Nhs                | Nance-Horan syndrome (human)                                                       | -1.02 | 0.885 | -1.59 | 0.003 | -1.91 | 0.009 | -1.12 | 0.621 | -1.41 |
| 1457588_at   | C76213             | expressed sequence C76213                                                          | -1.18 | 0.176 | -1.41 | 0.036 | -1.75 | 0.02  | -1.21 | 0.28  | -1.39 |
| 1454105_at   | ---                | ---                                                                                | -1.43 | 0.586 | -2.03 | 0.264 | -1.07 | 0.911 | -1.85 | 0.594 | -1.59 |

|              |                   |                                                                                 |       |         |       |       |       |       |       |       |       |
|--------------|-------------------|---------------------------------------------------------------------------------|-------|---------|-------|-------|-------|-------|-------|-------|-------|
| 1421647_at   | Cd1d2             | CD1d2 antigen                                                                   | -1.03 | 0.98    | -2.8  | 0.022 | -1.25 | 0.575 | -1.24 | 0.628 | -1.58 |
| 1419498_at   | Tmigd1            | transmembrane and immunoglobulin domain containing 1                            | -1.09 | 0.32    | -2.05 | 0.092 | -1.38 | 0.334 | -1.15 | 0.566 | -1.42 |
| 1445337_at   | Dnajc13           | DnaJ (Hsp40) homolog, subfamily C, member 13                                    | -1.2  | 0.136   | -1.32 | 0.041 | -1.84 | 0.02  | -1.35 | 0.386 | -1.43 |
| 1442698_at   | ---               | 7 days neonate cerebellum cDNA, RIKEN full-length enriched library, clone:A730  | -1.44 | 0.494   | -2.18 | 0.356 | -1.03 | 0.892 | -2.88 | 0.356 | -1.88 |
| 1442364_at   | Mapk14            | Mitogen activated protein kinase 14                                             | -1.08 | 0.909   | -1.83 | 0.175 | -1.53 | 0.29  | -2.69 | 0.026 | -1.78 |
| 1457928_at   | 4930435E12Rik     | RIKEN cDNA 4930435E12 gene                                                      | -1.42 | 0.443   | -1.84 | 0.336 | -1.13 | 0.527 | -1.07 | 0.911 | -1.37 |
| 1439928_at   | Spnb2             | Spectrin beta 2                                                                 | -1.2  | 0.1     | -1.15 | 0.624 | -2.35 | 0.014 | -1.59 | 0.222 | -1.57 |
| 1459540_at   | Cdc26             | Cell division cycle 26                                                          | -1.11 | 0.623   | -1.65 | 0.165 | -1.61 | 0.293 | -1.34 | 0.424 | -1.43 |
| 1442012_at   | AU015791          | expressed sequence AU015791                                                     | -2.56 | 0.518   | -1.18 | 0.195 | -1.12 | 0.655 | -1.44 | 0.425 | -1.57 |
| 1419567_at   | Fank1             | fibronectin type 3 and ankyrin repeat domains 1                                 | -1.68 | 0.056   | -1.61 | 0.208 | -1.09 | 0.784 | -1.59 | 0.542 | -1.49 |
| 1430503_at   | 6330522J23Rik     | RIKEN cDNA 6330522J23 gene                                                      | -1.65 | 0.236   | -1.3  | 0.497 | -1.33 | 0.436 | -1.49 | 0.67  | -1.44 |
| 1439828_at   | Mapkapk5          | MAP kinase-activated protein kinase 5                                           | -1.7  | 0.033   | -1.32 | 0.293 | -1.27 | 0.486 | -1.61 | 0.083 | -1.48 |
| 1432196_a_at | Dscam1            | Down syndrome cell adhesion molecule-like 1                                     | -1.26 | 0.754   | -1.51 | 0.448 | -1.48 | 0.117 | -1.7  | 0.385 | -1.49 |
| 1444933_at   | ---               | Transcribed locus, moderately similar to XP_231006.3 PREDICTED: similar to fo   | -1.14 | 0.685   | -1.26 | 0.623 | -2.16 | 0.184 | -2.08 | 0.297 | -1.66 |
| 1444538_at   | AL033314          | Expressed sequence AL033314                                                     | -1.22 | 0.445   | -1.43 | 0.111 | -1.63 | 0.011 | -1.34 | 0.154 | -1.41 |
| 1422279_at   | Fv1               | Friend virus susceptibility 1                                                   | -2.02 | 0.267   | -1.37 | 0.507 | -1.1  | 0.743 | -2.13 | 0.557 | -1.65 |
| 1452388_at   | Hspa1a            | heat shock protein 1A                                                           | -1.51 | 0.014   | -1.45 | 0.14  | -1.28 | 0.639 | -1.79 | 0.418 | -1.51 |
| 1430433_at   | 4933406J08Rik /// | RIKEN cDNA 4933406J08 gene /// hypothetical protein LOC640572                   | -3.65 | 0.134   | -1.06 | 0.865 | -1.09 | 0.428 | -1.06 | 0.895 | -1.72 |
| 1420446_at   | Odf3              | outer dense fiber of sperm tails 3                                              | -1.63 | 0.044   | -1.33 | 0.138 | -1.3  | 0.095 | -1.39 | 0.312 | -1.41 |
| 1457223_at   | Elmod1            | ELMO domain containing 1                                                        | -1.1  | 0.487   | -1.02 | 0.951 | -4.12 | 0.005 | -1.03 | 0.847 | -1.82 |
| 1430749_at   | 2810040C05Rik     | RIKEN cDNA 2810040C05 gene                                                      | -1.27 | 0.338   | -1.26 | 0.392 | -1.81 | 0.1   | -1.46 | 0.385 | -1.45 |
| 1431732_at   | Spag16            | sperm associated antigen 16                                                     | -1.68 | 0.109   | -1.09 | 0.901 | -1.62 | 0.241 | -2.69 | 0.24  | -1.77 |
| 1458694_at   | Al789011          | expressed sequence Al789011                                                     | -2.43 | 0.113   | -1.14 | 0.796 | -1.18 | 0.263 | -1.03 | 0.813 | -1.45 |
| 1458191_at   | Foxp2             | forkhead box P2                                                                 | -1.27 | 0.454   | -1.54 | 0.023 | -1.43 | 0.088 | -1.08 | 0.821 | -1.33 |
| 1416129_at   | Errfi1            | ERBB receptor feedback inhibitor 1                                              | -1.47 | 0.162   | -1.19 | 0.229 | -1.63 | 0.004 | -2.22 | 0.215 | -1.63 |
| 1450432_s_at | Mus81             | MUS81 endonuclease homolog (yeast)                                              | -1.45 | 0.133   | -2    | 0.011 | -1.06 | 0.819 | -1.34 | 0.271 | -1.46 |
| 1437190_at   | Styk1             | serine/threonine/tyrosine kinase 1                                              | -1.23 | 0.584   | -2.12 | 0.389 | -1.18 | 0.5   | -1.05 | 0.923 | -1.39 |
| 1449392_at   | Hsd17b1           | hydroxysteroid (17-beta) dehydrogenase 1                                        | -1.11 | 0.89    | -2.89 | 0.054 | -1.13 | 0.857 | -1.14 | 0.539 | -1.57 |
| 1439800_at   | Rsn               | restin (Reed-Steinberg cell-expressed intermediate filament-associated protein) | -1.15 | 0.101   | -1.32 | 0.251 | -1.96 | 0.04  | -1.33 | 0.298 | -1.44 |
| 1458763_at   | C78024            | expressed sequence C78024                                                       | -1    | 0.999   | -1.2  | 0.746 | -3.26 | 0.002 | -1.13 | 0.748 | -1.65 |
| 1437367_at   | H2-K1             | Histocompatibility 2, K1, K region                                              | -1.04 | #DIV/0! | -2.72 | 0.099 | -1.24 | 0.413 | -1.35 | 0.268 | -1.59 |
| 1441493_at   | Erc1              | ELKS/RAB6-interacting/CAST family member 1                                      | -1.18 | 0.452   | -1.63 | 0.042 | -1.47 | 0.006 | -1.07 | 0.74  | -1.34 |
| 1456659_at   | LOC552902         | hypothetical LOC552902                                                          | -1.39 | 0.238   | -1.04 | 0.588 | -2.2  | 0.023 | -2.2  | 0.053 | -1.71 |
| 1450936_a_at | Dnase1l2          | deoxyribonuclease 1-like 2                                                      | -1.19 | 0.417   | -2.79 | 0.12  | -1.06 | 0.9   | -1.29 | 0.222 | -1.58 |
| 1440143_at   | Pigz              | phosphatidylinositol glycan anchor biosynthesis, class Z                        | -1.14 | 0.533   | -1.75 | 0.259 | -1.45 | 0.022 | -1.09 | 0.38  | -1.36 |
| 1442772_at   | Ehbp1             | EH domain binding protein 1                                                     | -1.05 | 0.91    | -2.23 | 0.009 | -1.36 | 0.095 | -1.81 | 0.443 | -1.61 |
| 1458542_at   | Msi2              | Musashi homolog 2 (Drosophila)                                                  | -1.08 | 0.912   | -1.71 | 0.319 | -1.59 | 0.155 | -1.42 | 0.475 | -1.45 |
| 1443257_at   | 9630050E16Rik     | RIKEN cDNA 9630050E16 gene                                                      | -1.12 | 0.414   | -1.19 | 0.174 | -2.47 | 0.014 | -1.47 | 0.064 | -1.56 |
| 1425107_a_at | Lifr              | leukemia inhibitory factor receptor                                             | -1.03 | 0.778   | -2.68 | 0.005 | -1.26 | 0.11  | -1.92 | 0.025 | -1.72 |
| 1440977_at   | Akap13            | A kinase (PRKA) anchor protein 13                                               | -1.35 | 0.182   | -1.33 | 0.23  | -1.55 | 0.023 | -1.11 | 0.436 | -1.33 |
| 1433164_at   | 4930570E01Rik     | RIKEN cDNA 4930570E01 gene                                                      | -1.37 | 0.612   | -1.95 | 0.103 | -1.12 | 0.776 | -1.1  | 0.693 | -1.39 |
| 1444130_at   | 1700081L11Rik     | RIKEN cDNA 1700081L11 gene                                                      | -1.27 | 0.076   | -1.34 | 0.017 | -1.65 | 0.042 | -1.79 | 0.069 | -1.51 |
| 1454338_at   | Bat2d             | BAT2 domain containing 1                                                        | -1.35 | 0.313   | -1.32 | 0.672 | -1.55 | 0.22  | -1.26 | 0.578 | -1.37 |
| 1458467_at   | 1110032D16Rik     | RIKEN cDNA 1110032D16 gene                                                      | -2.19 | 0.224   | -1.18 | 0.741 | -1.2  | 0.694 | -1.14 | 0.547 | -1.43 |
| 1446182_at   | Zmynd11           | Zinc finger, MYND domain containing 11                                          | -1.21 | 0.262   | -1.51 | 0.036 | -1.53 | 0.142 | -1.92 | 0.009 | -1.54 |
| 1442052_at   | C330019G07Rik     | RIKEN cDNA C330019G07 gene                                                      | -1.47 | 0.037   | -1.32 | 0.082 | -1.43 | 0.178 | -1.27 | 0.45  | -1.37 |
| 1432887_at   | 3110048L19Rik     | RIKEN cDNA 3110048L19 gene                                                      | -1.19 | 0.386   | -1.41 | 0.14  | -1.69 | 0.112 | -1.47 | 0.537 | -1.44 |
| 1449673_s_at | ---               | ---                                                                             | -1.14 | 0.731   | -1.35 | 0.492 | -1.9  | 0.353 | -1.46 | 0.621 | -1.46 |
| 1459026_at   | Snw1              | SNW domain containing 1                                                         | -1.05 | 0.909   | -1.52 | 0.201 | -1.89 | 0.065 | -1.67 | 0.027 | -1.53 |
| 1431919_at   | Rttm              | rotatin                                                                         | -1.27 | 0.744   | -1.82 | 0.176 | -1.24 | 0.649 | -1.03 | 0.905 | -1.34 |
| 1438682_at   | Plk3r1            | phosphatidylinositol 3-kinase, regulatory subunit, polypeptide 1 (p85 alpha)    | -1.69 | 0.406   | -1.71 | 0.092 | -1.04 | 0.915 | -1.54 | 0.352 | -1.49 |
| 1458482_at   | Tnni3k            | TNNI3 interacting kinase                                                        | -1.01 | 0.973   | -2.52 | 0.123 | -1.32 | 0.646 | -1.26 | 0.661 | -1.53 |
| 1444961_at   | ---               | ---                                                                             | -1.14 | 0.485   | -2.62 | 0.099 | -1.13 | 0.605 | -1.07 | 0.918 | -1.49 |

|              |                   |                                                                                          |       |       |       |       |       |       |       |       |       |
|--------------|-------------------|------------------------------------------------------------------------------------------|-------|-------|-------|-------|-------|-------|-------|-------|-------|
| 1437587_at   | ---               | Transcribed locus                                                                        | -1.76 | 0.075 | -1.41 | 0.255 | -1.15 | 0.382 | -1.13 | 0.523 | -1.37 |
| 1421804_at   | Fabp9             | fatty acid binding protein 9, testis                                                     | -1.87 | 0.415 | -1.45 | 0.44  | -1.09 | 0.503 | -1    | 0.986 | -1.35 |
| 1459427_at   | Stam              | signal transducing adaptor molecule (SH3 domain and ITAM motif) 1                        | -1.32 | 0.703 | -1.73 | 0.148 | -1.24 | 0.648 | -1.62 | 0.604 | -1.48 |
| 1457417_at   | ---               | ---                                                                                      | -1.12 | 0.643 | -1.8  | 0.02  | -1.44 | 0.179 | -2.17 | 0.095 | -1.63 |
| 1457738_at   | Lsm14a            | LSM14 homolog A (SCD6, <i>S. cerevisiae</i> )                                            | -1.71 | 0.609 | -1.01 | 0.924 | -1.75 | 0.432 | -1.86 | 0.41  | -1.58 |
| 1444514_at   | B930096F20Rik     | RIKEN cDNA B930096F20 gene                                                               | -1.23 | 0.668 | -1.29 | 0.695 | -1.81 | 0.079 | -1.17 | 0.39  | -1.37 |
| 1438064_at   | Ybx1              | Y box protein 1                                                                          | -1.43 | 0.165 | -1.24 | 0.621 | -1.57 | 0.126 | -1.28 | 0.225 | -1.38 |
| 1458159_at   | Gnaq              | Guanine nucleotide binding protein, alpha q polypeptide                                  | -1.16 | 0.629 | -1.29 | 0.033 | -1.98 | 0.048 | -1.71 | 0.009 | -1.53 |
| 1457636_x_at | ---               | ---                                                                                      | -1.36 | 0.503 | -1.41 | 0.043 | -1.44 | 0.068 | -1.94 | 0.162 | -1.53 |
| 1430488_at   | 1700066B19Rik     | RIKEN cDNA 1700066B19 gene                                                               | -1.44 | 0.1   | -1.86 | 0.14  | -1.09 | 0.463 | -1.35 | 0.243 | -1.44 |
| 1431121_at   | Amotl1            | angiomin-like 1                                                                          | -1.61 | 0.223 | -1.22 | 0.774 | -1.42 | 0.415 | -1.15 | 0.763 | -1.35 |
| 1457524_at   | Tcf12             | Transcription factor 12                                                                  | -1.07 | 0.834 | -2.59 | 0.085 | -1.21 | 0.314 | -1.6  | 0.259 | -1.62 |
| 1441015_at   | Fut8              | Fucosyltransferase 8                                                                     | -1.61 | 0.219 | -1.55 | 0.604 | -1.14 | 0.363 | -2.34 | 0.183 | -1.66 |
| 1420062_at   | ---               | Transcribed locus                                                                        | -1.69 | 0.185 | -1.33 | 0.093 | -1.25 | 0.428 | -1.14 | 0.429 | -1.35 |
| 1447120_at   | Btrc              | Beta-transducin repeat containing protein                                                | -1.47 | 0.095 | -1.19 | 0.25  | -1.62 | 0.087 | -1.17 | 0.413 | -1.36 |
| 1421342_at   | Kcns2             | K+ voltage-gated channel, subfamily S, 2                                                 | -1.85 | 0.018 | -1.03 | 0.88  | -1.58 | 0.319 | -1.2  | 0.452 | -1.41 |
| 1427819_at   | ---               | ---                                                                                      | -1.52 | 0.113 | -1.68 | 0.355 | -1.12 | 0.834 | -1.29 | 0.526 | -1.4  |
| 1447740_at   | 1700034J05Rik /// | RIKEN cDNA 1700034J05 gene /// hypothetical protein LOC635035                            | -1.97 | 0.371 | -1.31 | 0.671 | -1.14 | 0.633 | -1.07 | 0.935 | -1.37 |
| 1443653_at   | ---               | ---                                                                                      | -1.69 | 0.059 | -1.18 | 0.776 | -1.42 | 0.134 | -1.79 | 0.065 | -1.52 |
| 1444364_at   | Rcor3             | REST corepressor 3                                                                       | -1.29 | 0.549 | -1.34 | 0.103 | -1.61 | 0.139 | -1.19 | 0.514 | -1.36 |
| 1434201_at   | Chrdl1            | Chordin-like 1                                                                           | -1.24 | 0.694 | -1.52 | 0.037 | -1.46 | 0.319 | -1.18 | 0.683 | -1.35 |
| 1440892_at   | BC017647          | CDNA sequence BC017647                                                                   | -1.19 | 0.291 | -1.42 | 0.007 | -1.67 | 0.104 | -1.26 | 0.346 | -1.38 |
| 1437833_at   | Ltbp3             | latent transforming growth factor beta binding protein 3                                 | -2.8  | 0.238 | -1.08 | 0.792 | -1.15 | 0.738 | -1.02 | 0.972 | -1.51 |
| 1447209_at   | Foxp1             | Forkhead box P1                                                                          | -1.37 | 0.183 | -1.22 | 0.263 | -1.67 | 0.147 | -2.59 | 0.114 | -1.71 |
| 1430363_at   | 4933407O12Rik     | RIKEN cDNA 4933407O12 gene                                                               | -3.51 | 0.145 | -1.1  | 0.795 | -1.05 | 0.851 | -1.07 | 0.628 | -1.68 |
| 1441552_at   | A430107P09Rik     | RIKEN cDNA A430107P09 gene                                                               | -1.13 | 0.876 | -1.38 | 0.528 | -1.87 | 0.058 | -1.92 | 0.176 | -1.57 |
| 1439328_at   | Nfat5             | nuclear factor of activated T-cells 5                                                    | -1.23 | 0.464 | -1.64 | 0.016 | -1.39 | 0.086 | -1.41 | 0.159 | -1.42 |
| 1451432_x_at | Alkbh4            | alkB, alkylation repair homolog 4 ( <i>E. coli</i> )                                     | -1.42 | 0.061 | -1.53 | 0.33  | -1.26 | 0.279 | -1.22 | 0.258 | -1.36 |
| 1456843_at   | Yes1              | Yamaguchi sarcoma viral (v-yes) oncogene homolog 1                                       | -1.24 | 0.49  | -1.5  | 0.128 | -1.48 | 0.161 | -1.1  | 0.858 | -1.33 |
| 1447571_at   | Elk4              | ELK4, member of ETS oncogene family                                                      | -1.54 | 0.017 | -1.37 | 0.005 | -1.31 | 0.414 | -1.05 | 0.815 | -1.32 |
| 1430345_at   | 5530402H23Rik     | RIKEN cDNA 5530402H23 gene                                                               | -1.25 | 0.11  | -1.48 | 0.086 | -1.5  | 0.022 | -1.78 | 0.158 | -1.5  |
| 1445686_at   | ---               | 12 days embryo spinal ganglion cDNA, RIKEN full-length enriched library, clone: [        | -1.2  | 0.588 | -1.22 | 0.583 | -2.04 | 0.17  | -2.53 | 0.285 | -1.75 |
| 1445689_at   | ---               | Transcribed locus                                                                        | -1.14 | 0.628 | -1.26 | 0.484 | -2.11 | 0.075 | -1.08 | 0.818 | -1.4  |
| 1444045_at   | ---               | Transcribed locus                                                                        | -1.15 | 0.66  | -1.11 | 0.585 | -2.64 | 0.035 | -1.09 | 0.851 | -1.5  |
| 1439243_x_at | Cops5             | COP9 (constitutive photomorphogenic) homolog, subunit 5 ( <i>Arabidopsis thaliana</i> )  | -1.12 | 0.818 | -1.46 | 0.61  | -1.75 | 0.077 | -1.88 | 0.013 | -1.55 |
| 1452547_s_at | H2-T18 /// LOC633 | histocompatibility 2, T region locus 18 /// similar to histocompatibility 2, T region Ic | -1.52 | 0.657 | -1.23 | 0.681 | -1.48 | 0.426 | -1.02 | 0.962 | -1.31 |
| 1439673_at   | E230008O15Rik     | RIKEN cDNA E230008O15 gene                                                               | -1.54 | 0.162 | -1.23 | 0.35  | -1.46 | 0.086 | -1.02 | 0.906 | -1.31 |
| 1455063_at   | 4921513D11Rik /// | RIKEN cDNA 4921513D11 gene /// expressed sequence AW061290                               | -1.46 | 0.329 | -1.42 | 0.179 | -1.32 | 0.095 | -1.47 | 0.226 | -1.42 |
| 1445535_at   | AA407107          | expressed sequence AA407107                                                              | -1.23 | 0.077 | -1.37 | 0.282 | -1.66 | 0.205 | -2.84 | 0.045 | -1.77 |
| 1446636_at   | Tns3              | tensin 3                                                                                 | -1.3  | 0.065 | -1.21 | 0.326 | -1.81 | 0.005 | -1.09 | 0.215 | -1.35 |
| 1427303_at   | Enpp3             | ectonucleotide pyrophosphatase/phosphodiesterase 3                                       | -1.64 | 0.154 | -1.03 | 0.921 | -1.77 | 0.024 | -2.67 | 0.013 | -1.77 |
| 1458821_at   | Sec24d            | SEC24 related gene family, member D ( <i>S. cerevisiae</i> )                             | -2.22 | 0.231 | -1.24 | 0.777 | -1.12 | 0.816 | -1.34 | 0.279 | -1.48 |
| 1433248_at   | 2310075M01Rik     | RIKEN cDNA 2310075M01 gene                                                               | -1.13 | 0.816 | -2.73 | 0.046 | -1.11 | 0.719 | -1.41 | 0.385 | -1.6  |
| 1430093_at   | 4933406P04Rik     | RIKEN cDNA 4933406P04 gene                                                               | -1.25 | 0.612 | -1.46 | 0.326 | -1.51 | 0.156 | -1.15 | 0.419 | -1.34 |
| 1421053_at   | Kif1a             | kinesin family member 1A                                                                 | -2.13 | 0.395 | -1.3  | 0.314 | -1.1  | 0.696 | -1.08 | 0.777 | -1.4  |
| 1437822_at   | Yme1l1            | YME1-like 1 ( <i>S. cerevisiae</i> )                                                     | -1.34 | 0.176 | -1.22 | 0.637 | -1.71 | 0.172 | -1    | 0.993 | -1.32 |
| 1439233_at   | Tloc1             | Translocation protein 1                                                                  | -1.23 | 0.6   | -1.16 | 0.389 | -2.12 | 0.047 | -1.03 | 0.662 | -1.39 |
| 1420994_at   | B3gnt5            | UDP-GlcNAc:betaGal beta-1,3-N-acetylglucosaminyltransferase 5                            | -1.09 | 0.783 | -2.86 | 0.098 | -1.13 | 0.587 | -2.39 | 0.127 | -1.87 |
| 1422335_at   | Adra2c            | adrenergic receptor, alpha 2c                                                            | -1.52 | 0.544 | -1.64 | 0.339 | -1.13 | 0.861 | -1.03 | 0.968 | -1.33 |
| 1439752_at   | ---               | PREDICTED: Mus musculus similar to O-acyltransferase (membrane bound) don                | -1.01 | 0.981 | -1.22 | 0.602 | -2.95 | 0.047 | -1.65 | 0.454 | -1.71 |
| 1440937_at   | Rbm41             | RNA binding motif protein 41                                                             | -1.23 | 0.473 | -1.59 | 0.415 | -1.41 | 0.527 | -1.06 | 0.901 | -1.32 |
| 1432100_a_at | 4930478P22Rik     | RIKEN cDNA 4930478P22 gene                                                               | -1.42 | 0.266 | -1.39 | 0.361 | -1.38 | 0.106 | -1.13 | 0.472 | -1.33 |
| 1434671_at   | B230337E12Rik     | RIKEN cDNA B230337E12 gene                                                               | -1.15 | 0.32  | -1.46 | 0.025 | -1.68 | 0.003 | -1.31 | 0.275 | -1.4  |

|              |               |                                                                                |       |       |       |       |       |       |       |       |       |
|--------------|---------------|--------------------------------------------------------------------------------|-------|-------|-------|-------|-------|-------|-------|-------|-------|
| 1432834_at   | Cpb2          | carboxypeptidase B2 (plasma)                                                   | -1.39 | 0.329 | -1.69 | 0.307 | -1.19 | 0.693 | -1.46 | 0.664 | -1.43 |
| 1451705_a_at | Oprm1         | opioid receptor, mu 1                                                          | -2.18 | 0.219 | -1.01 | 0.955 | -1.41 | 0.302 | -1.77 | 0.413 | -1.6  |
| 1433731_at   | Igf2bp3       | insulin-like growth factor 2 mRNA binding protein 3                            | -1.59 | 0.005 | -1.38 | 0.095 | -1.25 | 0.431 | -1.08 | 0.603 | -1.33 |
| 1439216_at   | 2900075B16Rik | RIKEN cDNA 2900075B16 gene                                                     | -1.24 | 0.563 | -1.95 | 0.01  | -1.2  | 0.413 | -1.5  | 0.128 | -1.47 |
| 1447168_at   | ---           | Transcribed locus                                                              | -1.73 | 0.106 | -1.08 | 0.868 | -1.54 | 0.319 | -2.07 | 0.194 | -1.61 |
| 1430263_at   | 1700109F18Rik | RIKEN cDNA 1700109F18 gene                                                     | -1.04 | 0.957 | -2.72 | 0.089 | -1.22 | 0.482 | -1.48 | 0.56  | -1.61 |
| 1444019_at   | Lrrc19        | leucine rich repeat containing 19                                              | -1.04 | 0.387 | -1.51 | 0.144 | -1.89 | 0.211 | -1.17 | 0.591 | -1.4  |
| 1440121_at   | St6galnac3    | ST6 (alpha-N-acetyl-neuraminy-2,3-beta-galactosyl-1,3)-N-acetylgalactosaminide | -1.33 | 0.191 | -1.08 | 0.891 | -2.1  | 0.007 | -1.48 | 0.257 | -1.5  |
| 1416288_at   | Dnaja1        | DnaJ (Hsp40) homolog, subfamily A, member 1                                    | -1.2  | 0.106 | -1.58 | 0.014 | -1.46 | 0.026 | -1.6  | 0.292 | -1.46 |
| 1442424_at   | Ctdspl2       | CTD (carboxy-terminal domain, RNA polymerase II, polypeptide A) small phospho  | -1.4  | 0.201 | -1.26 | 0.501 | -1.56 | 0.011 | -1.1  | 0.346 | -1.33 |
| 1428978_at   | 2900009J20Rik | RIKEN cDNA 2900009J20 gene                                                     | -1.24 | 0.577 | -1.45 | 0.186 | -1.52 | 0.212 | -1.21 | 0.055 | -1.36 |
| 1446433_at   | Acbd5         | acyl-Coenzyme A binding domain containing 5                                    | -1.66 | 0.034 | -1.38 | 0.105 | -1.21 | 0.548 | -1.32 | 0.168 | -1.39 |
| 1451406_a_at | Pcsk5         | proprotein convertase subtilisin/kexin type 5                                  | -1.21 | 0.374 | -1.59 | 0.035 | -1.44 | 0.299 | -1.53 | 0.485 | -1.44 |
| 1440041_at   | Tgfb3         | Transforming growth factor, beta receptor III                                  | -1.15 | 0.216 | -1.28 | 0.645 | -2    | 0.074 | -1.49 | 0.057 | -1.48 |
| 1431854_a_at | 4930452B06Rik | RIKEN cDNA 4930452B06 gene                                                     | -2.31 | 0.087 | -1.16 | 0.813 | -1.17 | 0.344 | -1.22 | 0.699 | -1.46 |
| 1455932_at   | Mtdh          | Metadherin                                                                     | -2.99 | 0.332 | -1.03 | 0.952 | -1.18 | 0.662 | -1.03 | 0.952 | -1.56 |
| 1441352_at   | 9430034N14Rik | RIKEN cDNA 9430034N14 gene                                                     | -1.07 | 0.405 | -1.98 | 0.026 | -1.41 | 0.12  | -1.69 | 0.184 | -1.54 |
| 1446437_at   | 9630028H03Rik | RIKEN cDNA 9630028H03 gene                                                     | -2.41 | 0.268 | -1.04 | 0.956 | -1.28 | 0.6   | -2.19 | 0.257 | -1.73 |
| 1440854_at   | 2810403A07Rik | RIKEN cDNA 2810403A07 gene                                                     | -1.06 | 0.826 | -1.49 | 0.05  | -1.85 | 0.033 | -1.49 | 0.193 | -1.47 |
| 1460139_at   | C79256        | expressed sequence C79256                                                      | -1.08 | 0.207 | -2.86 | 0.303 | -1.14 | 0.734 | -1.71 | 0.195 | -1.7  |
| 1441750_x_at | 4930447F24Rik | RIKEN cDNA 4930447F24 gene                                                     | -2.31 | 0.378 | -1.27 | 0.729 | -1.07 | 0.891 | -1.61 | 0.368 | -1.57 |
| 1430146_at   | 4933402N03Rik | RIKEN cDNA 4933402N03 gene                                                     | -1.62 | 0.223 | -1.66 | 0.369 | -1.07 | 0.89  | -1.6  | 0.486 | -1.49 |
| 1454551_at   | 9530034D02Rik | RIKEN cDNA 9530034D02 gene                                                     | -1.18 | 0.664 | -1.58 | 0.031 | -1.49 | 0.058 | -1.13 | 0.829 | -1.34 |
| 1442981_at   | ---           | ---                                                                            | -1.51 | 0.192 | -1.97 | 0.123 | -1.01 | 0.917 | -1.13 | 0.731 | -1.41 |
| 1430330_at   | Wiz           | widely-interspaced zinc finger motifs                                          | -1.33 | 0.314 | -1.77 | 0.194 | -1.19 | 0.642 | -1.07 | 0.809 | -1.34 |
| 1418690_at   | Ptprz1        | protein tyrosine phosphatase, receptor type Z, polypeptide 1                   | -2.22 | 0.159 | -1.11 | 0.835 | -1.24 | 0.554 | -1    | 1     | -1.39 |
| 1436049_at   | 5730589K01Rik | RIKEN cDNA 5730589K01 gene                                                     | -1.25 | 0.491 | -1.48 | 0.029 | -1.48 | 0.017 | -1.32 | 0.461 | -1.38 |
| 1438105_at   | LOC632687     | hypothetical protein LOC632686                                                 | -1.38 | 0.35  | -1.58 | 0.066 | -1.25 | 0.601 | -1.34 | 0.495 | -1.39 |
| 1424928_at   | 2210018M11Rik | RIKEN cDNA 2210018M11 gene                                                     | -1.13 | 0.324 | -1.71 | 0.036 | -1.46 | 0.006 | -1.07 | 0.633 | -1.34 |
| 1455280_at   | Frem1         | Fras1 related extracellular matrix protein 1                                   | -1.38 | 0.044 | -1.08 | 0.91  | -1.96 | 0.008 | -1.25 | 0.394 | -1.42 |
| 1430479_at   | 2010007H06Rik | RIKEN cDNA 2010007H06 gene                                                     | -2.01 | 0.215 | -1.2  | 0.794 | -1.22 | 0.333 | -1.37 | 0.519 | -1.45 |
| 1455260_at   | Lcorl         | ligand dependent nuclear receptor corepressor-like                             | -1.52 | 0.131 | -1.4  | 0.18  | -1.27 | 0.059 | -1.33 | 0.268 | -1.38 |
| 1433131_at   | 5033425B01Rik | RIKEN cDNA 5033425B01 gene                                                     | -1.18 | 0.458 | -1.6  | 0.266 | -1.46 | 0.313 | -1.46 | 0.587 | -1.42 |
| 1445038_at   | ---           | ---                                                                            | -1.26 | 0.768 | -1.24 | 0.555 | -1.78 | 0.312 | -1.42 | 0.313 | -1.43 |
| 1459242_at   | Elovl5        | ELOVL family member 5, elongation of long chain fatty acids (yeast)            | -1.62 | 0.136 | -1.12 | 0.864 | -1.55 | 0.093 | -1.21 | 0.411 | -1.38 |
| 1460101_at   | Nrxn3         | Neurexin III                                                                   | -1.27 | 0.598 | -2.21 | 0.219 | -1.09 | 0.88  | -2.52 | 0.021 | -1.77 |
| 1420278_at   | BC048599      | cDNA sequence BC048599                                                         | -1.83 | 0.462 | -1.04 | 0.909 | -1.54 | 0.516 | -1.1  | 0.76  | -1.38 |
| 1424886_at   | Ptprd         | protein tyrosine phosphatase, receptor type, D                                 | -1.02 | 0.754 | -1.45 | 0.11  | -2.04 | 0.035 | -1.03 | 0.921 | -1.39 |
| 1432997_at   | 5830462P14Rik | RIKEN cDNA 5830462P14 gene                                                     | -1.36 | 0.164 | -1.33 | 0.335 | -1.49 | 0.098 | -2.14 | 0.07  | -1.58 |
| 1441939_x_at | 2410003I16Rik | RIKEN cDNA 2410003I16 gene                                                     | -1.08 | 0.924 | -1.35 | 0.534 | -2.04 | 0.116 | -1.32 | 0.663 | -1.45 |
| 1437570_at   | AI503301      | expressed sequence AI503301                                                    | -1.36 | 0.324 | -1.48 | 0.362 | -1.34 | 0.353 | -1.01 | 0.919 | -1.3  |
| 1429902_at   | 5830443J22Rik | RIKEN cDNA 5830443J22 gene                                                     | -1.42 | 0.022 | -1.19 | 0.161 | -1.63 | 0.002 | -1.55 | 0.038 | -1.45 |
| 1458618_at   | Ireb2         | Iron responsive element binding protein 2                                      | -1.46 | 0.407 | -1.07 | 0.635 | -1.87 | 0.034 | -1.76 | 0.014 | -1.54 |
| 1442775_at   | St13          | Suppression of tumorigenicity 13                                               | -1.28 | 0.481 | -1.63 | 0.022 | -1.31 | 0.329 | -1.71 | 0.238 | -1.48 |
| 1440680_at   | ---           | Transcribed locus                                                              | -1.37 | 0.168 | -1.54 | 0.429 | -1.29 | 0.219 | -1.01 | 0.993 | -1.3  |
| 1439717_at   | B230362M20Rik | RIKEN cDNA B230362M20 gene                                                     | -1.46 | 0.464 | -1.4  | 0.161 | -1.32 | 0.051 | -1.04 | 0.804 | -1.3  |
| 1460073_at   | Prkar1b       | Protein kinase, cAMP dependent regulatory, type I beta                         | -1.29 | 0.453 | -1.5  | 0.509 | -1.39 | 0.029 | -1.21 | 0.651 | -1.35 |
| 1429526_at   | Brd8          | bromodomain containing 8                                                       | -1.05 | 0.324 | -1.89 | 0.056 | -1.48 | 0.061 | -1.01 | 0.978 | -1.36 |
| 1443384_at   | Ptk2          | PTK2 protein tyrosine kinase 2                                                 | -1.39 | 0.405 | -1.12 | 0.74  | -1.82 | 0.006 | -1.86 | 0.008 | -1.55 |
| 1447592_at   | Dbh           | dopamine beta hydroxylase                                                      | -1.67 | 0.396 | -1.06 | 0.773 | -1.62 | 0.476 | -2.99 | 0.23  | -1.84 |
| 1430039_at   | Cdkal1        | CDK5 regulatory subunit associated protein 1-like 1                            | -1.23 | 0.507 | -1.36 | 0.237 | -1.62 | 0.028 | -1.45 | 0.011 | -1.42 |
| 1456906_at   | 4833432P19Rik | RIKEN cDNA 4833432P19 gene                                                     | -1.32 | 0.187 | -1.22 | 0.376 | -1.72 | 0.125 | -1.06 | 0.787 | -1.33 |
| 1447201_at   | ---           | ---                                                                            | -1.25 | 0.724 | -1.57 | 0.229 | -1.38 | 0.441 | -2.85 | 0.117 | -1.76 |

|              |               |                                                                                |       |       |       |       |       |       |       |       |       |
|--------------|---------------|--------------------------------------------------------------------------------|-------|-------|-------|-------|-------|-------|-------|-------|-------|
| 1431902_at   | 4930401A09Rik | RIKEN cDNA 4930401A09 gene                                                     | -1.09 | 0.812 | -1.36 | 0.595 | -1.96 | 0.36  | -1.54 | 0.026 | -1.49 |
| 1456209_x_at | ---           | ---                                                                            | -1.4  | 0.547 | -1.17 | 0.563 | -1.69 | 0.025 | -1.46 | 0.009 | -1.43 |
| 1458019_at   | ---           | ---                                                                            | -2.35 | 0.338 | -1.08 | 0.897 | -1.23 | 0.689 | -1.15 | 0.864 | -1.45 |
| 1433450_at   | Cdk5r1        | cyclin-dependent kinase 5, regulatory subunit (p35) 1                          | -1.33 | 0.51  | -2.39 | 0.024 | -1.01 | 0.97  | -1.58 | 0.044 | -1.58 |
| 1444682_at   | BC037032      | cDNA Sequence BC037032                                                         | -1.09 | 0.404 | -1.91 | 0.233 | -1.38 | 0.052 | -1.07 | 0.878 | -1.37 |
| 1427480_at   | Leap2         | liver-expressed antimicrobial peptide 2                                        | -1.51 | 0.375 | -1.04 | 0.839 | -1.87 | 0.281 | -1.66 | 0.249 | -1.52 |
| 1449682_s_at | Tubb2b        | tubulin, beta 2b                                                               | -1.16 | 0.842 | -1.38 | 0.646 | -1.76 | 0.244 | -1.46 | 0.506 | -1.44 |
| 1445055_at   | ---           | Adult male hypothalamus cDNA, RIKEN full-length enriched library, clone:A23001 | -1.34 | 0.6   | -1.26 | 0.703 | -1.61 | 0.223 | -2.67 | 0.237 | -1.72 |
| 1430418_at   | Tmem57        | transmembrane protein 57                                                       | -1.35 | 0.089 | -1.46 | 0.107 | -1.36 | 0.132 | -1.24 | 0.504 | -1.35 |
| 1459956_at   | ---           | ---                                                                            | -1.1  | 0.314 | -2.83 | 0.078 | -1.11 | 0.21  | -2.49 | 0.058 | -1.88 |
| 1430350_at   | 2610035F20Rik | RIKEN cDNA 2610035F20 gene                                                     | -1.72 | 0.531 | -1.06 | 0.721 | -1.58 | 0.414 | -1.02 | 0.974 | -1.34 |
| 1455092_at   | Zfp207        | zinc finger protein 207                                                        | -1.32 | 0.63  | -1.57 | 0.053 | -1.31 | 0.266 | -1.08 | 0.869 | -1.32 |
| 1417836_at   | Gpx7          | glutathione peroxidase 7                                                       | -1.09 | 0.711 | -1.59 | 0.007 | -1.62 | 0.007 | -1.02 | 0.811 | -1.33 |
| 1425282_at   | Ibrdc2        | IBR domain containing 2                                                        | -2.17 | 0.085 | -1.15 | 0.674 | -1.2  | 0.491 | -1.01 | 0.948 | -1.38 |
| 1432935_at   | 5330433J24Rik | RIKEN cDNA 5330433J24 gene                                                     | -1.8  | 0.24  | -1.04 | 0.935 | -1.55 | 0.457 | -1.51 | 0.141 | -1.48 |
| 1419633_at   | Uncx4.1       | Unc4.1 homeobox (C. elegans)                                                   | -1.09 | 0.846 | -1.48 | 0.623 | -1.77 | 0.003 | -1.02 | 0.967 | -1.34 |
| 1419469_at   | Gnb4          | guanine nucleotide binding protein, beta 4                                     | -1.58 | 0.177 | -1.37 | 0.193 | -1.25 | 0.009 | -1.2  | 0.315 | -1.35 |
| 1436154_at   | ---           | 0 day neonate thymus cDNA, RIKEN full-length enriched library, clone:A430066P  | -1.31 | 0.693 | -1.85 | 0.248 | -1.16 | 0.74  | -1.2  | 0.767 | -1.38 |
| 1442812_at   | LOC433844     | similar to Anapc5 protein                                                      | -1.66 | 0.44  | -1.29 | 0.515 | -1.28 | 0.036 | -1.51 | 0.185 | -1.43 |
| 1457021_x_at | Amhr2         | anti-Mullerian hormone type 2 receptor                                         | -1.15 | 0.79  | -2.51 | 0.33  | -1.12 | 0.297 | -1.08 | 0.897 | -1.46 |
| 1440642_at   | D630042P16Rik | RIKEN cDNA D630042P16 gene                                                     | -1.36 | 0.205 | -1.52 | 0.084 | -1.3  | 0.247 | -1.14 | 0.813 | -1.33 |
| 1437504_at   | Sla2          | Src-like-adaptor 2                                                             | -2    | 0.554 | -1.14 | 0.709 | -1.28 | 0.214 | -1.39 | 0.078 | -1.45 |
| 1443592_at   | AA617406      | expressed sequence AA617406                                                    | -1.31 | 0.261 | -1.19 | 0.671 | -1.79 | 0.155 | -1.71 | 0.212 | -1.5  |
| 1446694_at   | Dnm3          | Dynamin 3                                                                      | -1.19 | 0.506 | -1.81 | 0.433 | -1.3  | 0.552 | -1.06 | 0.512 | -1.34 |
| 1442296_at   | Wdr75         | WD repeat domain 75                                                            | -1.49 | 0.043 | -1.36 | 0.156 | -1.32 | 0.03  | -1.7  | 0.043 | -1.47 |
| 1457813_at   | Mrps18a       | Mitochondrial ribosomal protein S18A                                           | -1.38 | 0.437 | -1.41 | 0.317 | -1.37 | 0.312 | -1.46 | 0.195 | -1.41 |
| 1427193_at   | Brd8          | bromodomain containing 8                                                       | -1.66 | 0.053 | -1.13 | 0.724 | -1.48 | 0.05  | -1.05 | 0.879 | -1.33 |
| 1453967_at   | 1700093J21Rik | RIKEN cDNA 1700093J21 gene                                                     | -1.32 | 0.385 | -1.21 | 0.812 | -1.72 | 0.06  | -3.53 | 0.002 | -1.95 |
| 1433058_at   | 4933411O13Rik | RIKEN cDNA 4933411O13 gene                                                     | -1.29 | 0.741 | -1.18 | 0.789 | -1.85 | 0.117 | -1.76 | 0.439 | -1.52 |
| 1437617_x_at | 1110034G24Rik | RIKEN cDNA 1110034G24 gene                                                     | -1.37 | 0.274 | -1.16 | 0.491 | -1.76 | 0.034 | -1.01 | 0.735 | -1.32 |
| 1442470_at   | ---           | ---                                                                            | -1.08 | 0.568 | -1.41 | 0.11  | -1.88 | 0.058 | -1.12 | 0.157 | -1.37 |
| 1420077_at   | AI452102      | expressed sequence AI452102                                                    | -1.08 | 0.619 | -1.62 | 0.46  | -1.61 | 0.213 | -1.17 | 0.797 | -1.37 |
| 1420092_at   | Morc3         | microorchidia 3                                                                | -1.54 | 0.415 | -1.09 | 0.776 | -1.67 | 0.039 | -1.27 | 0.012 | -1.39 |
| 1451585_x_at | Spsb2         | splA/ryanodine receptor domain and SOCS box containing 2                       | -1.44 | 0.114 | -1.69 | 0.003 | -1.14 | 0.318 | -1.05 | 0.694 | -1.33 |
| 1459451_at   | ---           | ---                                                                            | -2.62 | 0.329 | -1.14 | 0.769 | -1.1  | 0.789 | -1.44 | 0.122 | -1.58 |
| 1421377_at   | Traf6         | Tnf receptor-associated factor 6                                               | -1.65 | 0.043 | -1.25 | 0.73  | -1.32 | 0.652 | -1.54 | 0.571 | -1.44 |
| 1446700_at   | ---           | ---                                                                            | -1.2  | 0.646 | -1.39 | 0.589 | -1.63 | 0.119 | -1.64 | 0.533 | -1.46 |
| 1422144_at   | Inhbe         | inhibin beta E                                                                 | -1.15 | 0.549 | -1.36 | 0.327 | -1.79 | 0.021 | -1.69 | 0.209 | -1.5  |
| 1432875_at   | 4632409D06Rik | RIKEN cDNA 4632409D06 gene                                                     | -1.94 | 0.128 | -1.53 | 0.451 | -1    | 0.998 | -2.31 | 0.221 | -1.7  |
| 1440227_at   | BF642829      | expressed sequence BF642829                                                    | -1    | 0.968 | -1.8  | 0.107 | -1.63 | 0.033 | -1    | 0.993 | -1.36 |
| 1423377_at   | Igfbp1        | insulin-like growth factor binding protein-like 1                              | -1.55 | 0.061 | -1.55 | 0.288 | -1.14 | 0.454 | -1.24 | 0.481 | -1.37 |
| 1457146_at   | Dock4         | dedicator of cytokinesis 4                                                     | -1.2  | 0.077 | -1.1  | 0.247 | -2.35 | 0.012 | -1.17 | 0.333 | -1.45 |
| 1455526_at   | Diras1        | DIRAS family, GTP-binding RAS-like 1                                           | -1.22 | 0.378 | -1.79 | 0.149 | -1.27 | 0.111 | -1.54 | 0.034 | -1.46 |
| 1424387_at   | Prp3          | prolactin-like protein C 3                                                     | -1    | 0.992 | -1.52 | 0.493 | -1.95 | 0.246 | -1.32 | 0.57  | -1.45 |
| 1442620_at   | 4931420C21Rik | RIKEN cDNA 4931420C21 gene                                                     | -1.21 | 0.252 | -1.22 | 0.259 | -1.93 | 0     | -2.25 | 0.088 | -1.65 |
| 1451642_at   | Kif1b         | kinesin family member 1B                                                       | -1.09 | 0.261 | -1.76 | 0     | -1.46 | 0.115 | -1.33 | 0.227 | -1.41 |
| 1459206_at   | ---           | ---                                                                            | -1.02 | 0.934 | -1.44 | 0.132 | -2.05 | 0.146 | -4.61 | 0     | -2.28 |
| 1421479_at   | Zfp318        | zinc finger protein 318                                                        | -1.58 | 0.389 | -1.48 | 0.004 | -1.16 | 0.367 | -3.12 | 0.087 | -1.84 |
| 1439546_at   | 4933417O08Rik | RIKEN cDNA 4933417O08 gene                                                     | -1.27 | 0.426 | -1.22 | 0.213 | -1.79 | 0.437 | -1.47 | 0.316 | -1.44 |
| 1444106_at   | D330012F22Rik | RIKEN cDNA D330012F22 gene                                                     | -1.38 | 0.242 | -1.51 | 0.168 | -1.28 | 0.149 | -1.07 | 0.76  | -1.31 |
| 1440158_x_at | Chchd7        | Coiled-coil-helix-coiled-coil-helix domain containing 7                        | -1.1  | 0.554 | -3.25 | 0.014 | -1.05 | 0.9   | -1.11 | 0.81  | -1.63 |
| 1424529_s_at | Cgref1        | cell growth regulator with EF hand domain 1                                    | -1.01 | 0.775 | -1.82 | 0.168 | -1.59 | 0.015 | -1.04 | 0.886 | -1.36 |
| 1447711_x_at | 4933412E12Rik | RIKEN cDNA 4933412E12 gene                                                     | -1.52 | 0.412 | -1.8  | 0.127 | -1.05 | 0.73  | -1.36 | 0.455 | -1.43 |

|              |                   |                                                                                 |       |       |       |       |       |       |       |       |       |
|--------------|-------------------|---------------------------------------------------------------------------------|-------|-------|-------|-------|-------|-------|-------|-------|-------|
| 1446871_at   | D7Ert481e         | DNA segment, Chr 7, ERATO Doi 481, expressed                                    | -1.01 | 0.987 | -2.35 | 0.141 | -1.33 | 0.361 | -1.4  | 0.192 | -1.52 |
| 1431147_at   | Rint1             | RAD50 interactor 1                                                              | -2.08 | 0.244 | -1.14 | 0.681 | -1.23 | 0.2   | -1.01 | 0.952 | -1.37 |
| 1422177_at   | Il13ra2           | interleukin 13 receptor, alpha 2                                                | -1.24 | 0.642 | -1.69 | 0.198 | -1.3  | 0.145 | -1.36 | 0.322 | -1.4  |
| 1457821_at   | 2610511M17Rik     | RIKEN cDNA 2610511M17 gene                                                      | -1.08 | 0.319 | -1.56 | 0.127 | -1.66 | 0.071 | -2.79 | 0.27  | -1.77 |
| 1430512_a_at | Iggbp1b           | immunoglobulin (CD79A) binding protein 1b                                       | -1.76 | 0.037 | -1.52 | 0.442 | -1.06 | 0.674 | -1.16 | 0.642 | -1.38 |
| 1434499_a_at | Ldhb              | lactate dehydrogenase B                                                         | -1.07 | 0.361 | -2.23 | 0.172 | -1.27 | 0.188 | -1.91 | 0.032 | -1.62 |
| 1443025_at   | ---               | 10 days neonate medulla oblongata cDNA, RIKEN full-length enriched library, clo | -2.43 | 0.083 | -1.03 | 0.85  | -1.26 | 0.711 | -2    | 0.383 | -1.68 |
| 1432811_at   | ---               | ---                                                                             | -1.3  | 0.27  | -1.35 | 0.572 | -1.5  | 0.115 | -1.5  | 0.333 | -1.42 |
| 1459885_s_at | Cox7c             | cytochrome c oxidase, subunit VIIc                                              | -1.4  | 0.215 | -1.4  | 0.123 | -1.35 | 0.122 | -1.16 | 0.41  | -1.33 |
| 1448040_at   | Tfpt              | TCF3 (E2A) fusion partner                                                       | -1.55 | 0.114 | -1.64 | 0.405 | -1.09 | 0.751 | -1.29 | 0.177 | -1.39 |
| 1438999_a_at | Nfat5             | nuclear factor of activated T-cells 5                                           | -1.23 | 0.158 | -1.52 | 0.001 | -1.43 | 0.143 | -1.46 | 0.356 | -1.41 |
| 1421416_at   | Map2k7            | mitogen activated protein kinase kinase 7                                       | -1.63 | 0.026 | -1.11 | 0.839 | -1.51 | 0.377 | -1.15 | 0.358 | -1.35 |
| 1454318_at   | 2810403D21Rik     | RIKEN cDNA 2810403D21 gene                                                      | -1.37 | 0.267 | -1.51 | 0.172 | -1.28 | 0.553 | -1.47 | 0.279 | -1.41 |
| 1427657_at   | 2310042L06Rik     | RIKEN cDNA 2310042L06 gene                                                      | -2.5  | 0.098 | -1.01 | 0.951 | -1.27 | 0.317 | -1.19 | 0.191 | -1.49 |
| 1432002_at   | 2810471M01Rik     | RIKEN cDNA 2810471M01 gene                                                      | -1.68 | 0.572 | -1.62 | 0.364 | -1.04 | 0.917 | -1.54 | 0.313 | -1.47 |
| 1435926_at   | E030003F13Rik     | RIKEN cDNA E030003F13 gene                                                      | -1.2  | 0.165 | -1.29 | 0.182 | -1.77 | 0.005 | -1.39 | 0.132 | -1.41 |
| 1457748_at   | Pogz              | pogo transposable element with ZNF domain                                       | -2.15 | 0.118 | -1.25 | 0.638 | -1.1  | 0.762 | -1.51 | 0.194 | -1.5  |
| 1432715_at   | Lrrn1             | leucine rich repeat protein 1, neuronal                                         | -1.77 | 0.483 | -1.18 | 0.732 | -1.32 | 0.43  | -1.07 | 0.896 | -1.34 |
| 1445552_at   | A830039H10Rik     | RIKEN cDNA A830039H10 gene                                                      | -1.48 | 0.244 | -1.42 | 0.365 | -1.26 | 0.126 | -1.5  | 0.048 | -1.42 |
| 1459959_at   | Gldc              | Glycine decarboxylase                                                           | -1.04 | 0.925 | -1.86 | 0.238 | -1.48 | 0.307 | -1.05 | 0.95  | -1.36 |
| 1440430_at   | A130004G07Rik     | RIKEN cDNA A130004G07 gene                                                      | -1.18 | 0.418 | -1.27 | 0.158 | -1.86 | 0.049 | -1.37 | 0.065 | -1.42 |
| 1457182_at   | Map2k7            | mitogen activated protein kinase kinase 7                                       | -1.91 | 0.172 | -1.1  | 0.839 | -1.35 | 0.281 | -2.01 | 0.434 | -1.59 |
| 1441292_at   | RP23-14F5.7       | Hypothetical gene Rp23-14f5.7                                                   | -1.55 | 0.086 | -1.12 | 0.874 | -1.57 | 0.462 | -5.35 | 0.129 | -2.4  |
| 1448340_at   | Tmem30a           | transmembrane protein 30A                                                       | -1.18 | 0.088 | -1.55 | 0.059 | -1.47 | 0.043 | -1.21 | 0.268 | -1.35 |
| 1454401_at   | 5730488B01Rik     | RIKEN cDNA 5730488B01 gene                                                      | -2.46 | 0.253 | -1.22 | 0.691 | -1.06 | 0.845 | -1.76 | 0.155 | -1.62 |
| 1453540_at   | 5430404G13Rik     | RIKEN cDNA 5430404G13 gene                                                      | -1.3  | 0.245 | -1.03 | 0.877 | -2.33 | 0.021 | -1.43 | 0.243 | -1.52 |
| 1443300_at   | Notch3            | Notch gene homolog 3 (Drosophila)                                               | -1.18 | 0.566 | -1.36 | 0.732 | -1.69 | 0.015 | -2.3  | 0.349 | -1.63 |
| 1419974_at   | Scp2              | sterol carrier protein 2, liver                                                 | -1.8  | 0.082 | -1.46 | 0.111 | -1.07 | 0.776 | -1.1  | 0.523 | -1.36 |
| 1446098_at   | Zfp407            | Zinc finger protein 407                                                         | -1.47 | 0.001 | -1.02 | 0.951 | -1.97 | 0.005 | -1.33 | 0.2   | -1.45 |
| 1457653_at   | A630042L21Rik     | RIKEN cDNA A630042L21 gene                                                      | -1.12 | 0.811 | -1.72 | 0.158 | -1.43 | 0.053 | -1.55 | 0.172 | -1.45 |
| 1459709_at   | ---               | ---                                                                             | -1.15 | 0.486 | -1.07 | 0.895 | -2.74 | 0.098 | -1.71 | 0.502 | -1.67 |
| 1416552_at   | Dppa5             | developmental pluripotency associated 5                                         | -1.5  | 0.092 | -1.44 | 0.303 | -1.23 | 0.251 | -1.14 | 0.51  | -1.33 |
| 1447982_at   | 1110008P14Rik     | RIKEN cDNA 1110008P14 gene                                                      | -1.69 | 0.003 | -1.22 | 0.369 | -1.31 | 0.282 | -1.04 | 0.938 | -1.32 |
| 1433401_at   | 5033405D04Rik     | RIKEN cDNA 5033405D04 gene                                                      | -1.1  | 0.674 | -1.35 | 0.24  | -1.92 | 0.379 | -1.26 | 0.696 | -1.41 |
| 1430404_at   | 4833416J08Rik     | RIKEN cDNA 4833416J08 gene                                                      | -1.02 | 0.931 | -1.63 | 0.108 | -1.73 | 0.009 | -1.13 | 0.325 | -1.38 |
| 1446403_at   | AU022899          | expressed sequence AU022899                                                     | -1.38 | 0.5   | -1.63 | 0.534 | -1.2  | 0.643 | -1.03 | 0.964 | -1.31 |
| 1420758_at   | 5830411J07Rik     | RIKEN cDNA 5830411J07 gene                                                      | -1.28 | 0.442 | -1.11 | 0.83  | -2.03 | 0.155 | -1.35 | 0.7   | -1.44 |
| 1447147_at   | Atg7              | Autophagy-related 7 (yeast)                                                     | -1.59 | 0.165 | -1.1  | 0.769 | -1.57 | 0.176 | -1.55 | 0.236 | -1.45 |
| 1427743_at   | Gm672             | Gene model 672, (NCBI)                                                          | -1.41 | 0.298 | -1.31 | 0.18  | -1.42 | 0.126 | -1.12 | 0.564 | -1.32 |
| 1437958_at   | Xpr1              | xenotropic and polytropic retrovirus receptor 1                                 | -1.48 | 0.015 | -1.37 | 0.45  | -1.3  | 0.048 | -1.06 | 0.749 | -1.3  |
| 1439493_at   | D630040G17Rik /// | RIKEN cDNA D630040G17 gene /// similar to zinc finger protein 64 (predicted)    | -1.36 | 0.075 | -1.42 | 0.456 | -1.36 | 0.161 | -1.91 | 0.044 | -1.51 |
| 1442684_x_at | Hmg20a            | high mobility group 20A                                                         | -1.61 | 0.064 | -1.11 | 0.657 | -1.52 | 0.106 | -1.75 | 0.298 | -1.5  |
| 1437793_at   | Tnks2             | Tankyrase, TRF1-interacting ankyrin-related ADP-ribose polymerase 2             | -1.06 | 0.436 | -1.5  | 0.309 | -1.76 | 0.008 | -1.34 | 0.159 | -1.42 |
| 1440398_at   | ---               | ---                                                                             | -1.53 | 0.072 | -1.51 | 0.08  | -1.16 | 0.586 | -1.22 | 0.015 | -1.36 |
| 1440976_at   | 1110035M17Rik     | RIKEN cDNA 1110035M17 gene                                                      | -1.58 | 0.171 | -1.53 | 0.146 | -1.12 | 0.141 | -1.01 | 0.928 | -1.31 |
| 1439475_at   | AI929863          | expressed sequence AI929863                                                     | -1.58 | 0.072 | -1.69 | 0.055 | -1.05 | 0.75  | -2.13 | 0.016 | -1.61 |
| 1434943_at   | BC023055          | cDNA sequence BC023055                                                          | -1.21 | 0.438 | -2.34 | 0.132 | -1.08 | 0.683 | -1.62 | 0.432 | -1.56 |
| 1439275_s_at | 9530010C24Rik     | RIKEN cDNA 9530010C24 gene                                                      | -1.23 | 0.061 | -1.13 | 0.816 | -2.07 | 0.025 | -2.54 | 0.175 | -1.75 |
| 1441840_x_at | Stno              | Strawberry notch homolog (Drosophila)                                           | -1.66 | 0.466 | -1.05 | 0.791 | -1.59 | 0.002 | -1.47 | 0.206 | -1.44 |
| 1428298_at   | 1700029G01Rik     | RIKEN cDNA 1700029G01 gene                                                      | -1.64 | 0.026 | -1.07 | 0.88  | -1.58 | 0.015 | -1    | 0.998 | -1.32 |
| 1450174_at   | Ptptr             | protein tyrosine phosphatase, receptor type, T                                  | -2.43 | 0.239 | -1.24 | 0.305 | -1.04 | 0.876 | -1.27 | 0.595 | -1.5  |
| 1458182_at   | Rbm18             | RNA binding motif protein 18                                                    | -1.45 | 0.015 | -1.29 | 0.012 | -1.41 | 0.217 | -1.21 | 0.373 | -1.34 |
| 1443128_at   | Ints6             | integrator complex subunit 6                                                    | -1.45 | 0.033 | -1.71 | 0.031 | -1.1  | 0.593 | -1.03 | 0.897 | -1.32 |

|              |               |                                                                                 |       |       |       |       |       |       |       |       |       |
|--------------|---------------|---------------------------------------------------------------------------------|-------|-------|-------|-------|-------|-------|-------|-------|-------|
| 1444522_at   | ---           | Transcribed locus                                                               | -1.29 | 0.481 | -1.93 | 0.182 | -1.13 | 0.801 | -1.32 | 0.607 | -1.42 |
| 1433266_at   | 2810416A17Rik | RIKEN cDNA 2810416A17 gene                                                      | -1.15 | 0.463 | -1.36 | 0.177 | -1.74 | 0.009 | -1.69 | 0.015 | -1.49 |
| 1439316_at   | Rbm39         | RNA binding motif protein 39                                                    | -1.21 | 0.268 | -1.25 | 0.144 | -1.8  | 0.056 | -1.32 | 0.104 | -1.4  |
| 1440010_at   | C230066K19Rik | RIKEN cDNA C230066K19 gene                                                      | -1.57 | 0.243 | -1.36 | 0.289 | -1.24 | 0.172 | -1.62 | 0     | -1.45 |
| 1455492_at   | B330016D10Rik | RIKEN cDNA B330016D10 gene                                                      | -1.19 | 0.043 | -1.96 | 0.016 | -1.2  | 0.245 | -1.41 | 0.149 | -1.44 |
| 1459559_at   | ---           | ---                                                                             | -1.01 | 0.967 | -1.73 | 0.454 | -1.63 | 0.06  | -1.52 | 0.621 | -1.47 |
| 1446200_at   | Dcc           | Deleted in colorectal carcinoma                                                 | -1.98 | 0.233 | -1.05 | 0.942 | -1.38 | 0.477 | -1.12 | 0.86  | -1.38 |
| 1440066_at   | Smardc1       | SWI/SNF-related, matrix-associated actin-dependent regulator of chromatin, subf | -1.41 | 0.068 | -1.26 | 0.142 | -1.46 | 0.058 | -1.03 | 0.867 | -1.29 |
| 1450591_at   | Olf154        | olfactory receptor 154                                                          | -1.05 | 0.823 | -1.86 | 0.534 | -1.44 | 0.129 | -1.58 | 0.092 | -1.48 |
| 1439046_at   | Ccdc55        | coiled-coil domain containing 55                                                | -1.08 | 0.545 | -1.66 | 0.031 | -1.53 | 0.123 | -1.25 | 0.366 | -1.38 |
| 1444400_at   | Rb1           | retinoblastoma 1                                                                | -1    | 0.999 | -2.96 | 0.243 | -1.19 | 0.779 | -1.8  | 0.449 | -1.74 |
| 1422096_at   | 4933434I20Rik | RIKEN cDNA 4933434I20 gene                                                      | -1.4  | 0.035 | -1.78 | 0.363 | -1.1  | 0.702 | -3.04 | 0.203 | -1.83 |
| 1435119_at   | ---           | Adult male medulla oblongata cDNA, RIKEN full-length enriched library, clone:63 | -1.71 | 0.487 | -1.1  | 0.729 | -1.45 | 0.107 | -1.42 | 0.494 | -1.42 |
| 1457449_at   | Lass6         | Longevity assurance homolog 6 (S. cerevisiae)                                   | -2.18 | 0.002 | -1.04 | 0.891 | -1.32 | 0.449 | -1.07 | 0.852 | -1.4  |
| 1421467_at   | Runx3         | runt related transcription factor 3                                             | -1.04 | 0.971 | -3.42 | 0.181 | -1.08 | 0.907 | -1.36 | 0.694 | -1.73 |
| 1443399_at   | AU021001      | expressed sequence AU021001                                                     | -1.31 | 0.249 | -1.45 | 0.47  | -1.38 | 0.297 | -1.57 | 0.006 | -1.43 |
| 1421270_at   | Sh3rf1        | SH3 domain containing ring finger 1                                             | -1.58 | 0.286 | -1.25 | 0.754 | -1.34 | 0.444 | -2.6  | 0.315 | -1.69 |
| 1444188_at   | ---           | ---                                                                             | -1.16 | 0.357 | -1.34 | 0.435 | -1.74 | 0.006 | -2.17 | 0.026 | -1.6  |
| 1452572_at   | Camk4         | calcium/calmodulin-dependent protein kinase IV                                  | -1.39 | 0.236 | -1.27 | 0.532 | -1.47 | 0.169 | -1.09 | 0.849 | -1.31 |
| 1434294_at   | ---           | Transcribed locus                                                               | -1.24 | 0.572 | -1.21 | 0.349 | -1.83 | 0.019 | -1.5  | 0.187 | -1.44 |
| 1449727_x_at | ---           | ---                                                                             | -1.33 | 0.62  | -1.56 | 0.279 | -1.27 | 0.628 | -1.03 | 0.942 | -1.3  |
| 1457399_at   | Elavl4        | ELAV (embryonic lethal, abnormal vision, Drosophila)-like 4 (Hu antigen D)      | -1.37 | 0.1   | -1.17 | 0.488 | -1.68 | 0.135 | -1.06 | 0.715 | -1.32 |
| 1438871_at   | Son           | Son cell proliferation protein                                                  | -1.09 | 0.663 | -1.49 | 0.085 | -1.69 | 0.078 | -1.5  | 0.19  | -1.44 |
| 1441463_at   | ---           | ---                                                                             | -1.48 | 0.46  | -1.19 | 0.414 | -1.49 | 0.076 | -1.21 | 0.378 | -1.34 |
| 1433325_at   | 9330154F10Rik | RIKEN cDNA 9330154F10 gene                                                      | -1.31 | 0.297 | -1.98 | 0.338 | -1.09 | 0.858 | -1.61 | 0.433 | -1.5  |
| 1445814_at   | ---           | Adult male testis cDNA, RIKEN full-length enriched library, clone:4930402N10 pr | -1.95 | 0.365 | -1.39 | 0.631 | -1.05 | 0.898 | -1.37 | 0.653 | -1.44 |
| 1426104_at   | Mapk14        | mitogen activated protein kinase 14                                             | -1.15 | 0.817 | -2.77 | 0.021 | -1.05 | 0.909 | -1.02 | 0.96  | -1.5  |
| 1425883_at   | Smg6          | Smg-6 homolog, nonsense mediated mRNA decay factor (C. elegans)                 | -1.71 | 0.248 | -1.66 | 0.237 | -1    | 0.991 | -1.34 | 0.465 | -1.43 |
| 1440959_s_at | Mynn          | myoneurin                                                                       | -1.25 | 0.519 | -1.26 | 0.163 | -1.69 | 0.013 | -1.15 | 0.455 | -1.34 |
| 1439639_at   | Phc2          | Polyhomeotic-like 2 (Drosophila)                                                | -1.21 | 0.642 | -1.32 | 0.687 | -1.65 | 0.177 | -1.48 | 0.328 | -1.42 |
| 1442375_at   | Ubap2         | Ubiquitin-associated protein 2                                                  | -1.2  | 0.219 | -1.2  | 0.64  | -1.91 | 0.003 | -1.02 | 0.958 | -1.33 |
| 1457608_at   | Gimap8        | GTPase, IMAP family member 8                                                    | -1.42 | 0.411 | -1.18 | 0.667 | -1.58 | 0.142 | -1.92 | 0.346 | -1.52 |
| 1429542_at   | 1700007B14Rik | RIKEN cDNA 1700007B14 gene                                                      | -1.04 | 0.95  | -1.94 | 0.042 | -1.4  | 0.51  | -1.3  | 0.584 | -1.42 |
| 1455421_x_at | 6330503C03Rik | RIKEN cDNA 6330503C03 gene                                                      | -1.21 | 0.786 | -2.06 | 0.031 | -1.15 | 0.718 | -1.94 | 0.334 | -1.59 |
| 1433221_at   | 2610311E24Rik | RIKEN cDNA 2610311E24 gene                                                      | -1.82 | 0.036 | -1.32 | 0.632 | -1.13 | 0.456 | -1.13 | 0.565 | -1.35 |
| 1456812_at   | Abcd2         | ATP-binding cassette, sub-family D (ALD), member 2                              | -1.16 | 0.462 | -1.71 | 0.194 | -1.35 | 0.336 | -1.06 | 0.897 | -1.32 |
| 1427789_s_at | Gnas          | GNAS (guanine nucleotide binding protein, alpha stimulating) complex locus      | -1.55 | 0.088 | -1.46 | 0.44  | -1.17 | 0.734 | -2.09 | 0.115 | -1.57 |
| 1441844_at   | Eps151        | Epidermal growth factor receptor pathway substrate 15-like 1                    | -1.42 | 0.19  | -1.29 | 0.219 | -1.41 | 0.223 | -1.19 | 0.64  | -1.33 |
| 1420059_at   | 2410166I05Rik | RIKEN cDNA 2410166I05 gene                                                      | -1.26 | 0.016 | -1.37 | 0.134 | -1.51 | 0.27  | -1.05 | 0.833 | -1.3  |
| 1439810_s_at | Pramel7       | preferentially expressed antigen in melanoma like 7                             | -1.1  | 0.504 | -1.09 | 0.87  | -2.78 | 0.293 | -3.11 | 0.015 | -2.02 |
| 1436223_at   | Itgb8         | integrin beta 8                                                                 | -1.05 | 0.639 | -2.38 | 0.079 | -1.23 | 0.134 | -1.17 | 0.691 | -1.46 |
| 1447506_at   | ---           | ---                                                                             | -1.35 | 0.246 | -1.37 | 0.156 | -1.39 | 0.254 | -1.04 | 0.908 | -1.29 |
| 1454951_at   | Zfp606        | zinc finger protein 606                                                         | -1.24 | 0.168 | -1.45 | 0.139 | -1.44 | 0.022 | -1.52 | 0.162 | -1.41 |
| 1446066_at   | Zcchc17       | zinc finger, CCHC domain containing 17                                          | -1.47 | 0.204 | -1.09 | 0.746 | -1.69 | 0.118 | -1.3  | 0.42  | -1.39 |
| 1419245_at   | Rab14         | RAB14, member RAS oncogene family                                               | -1.3  | 0.251 | -1.64 | 0.051 | -1.23 | 0.376 | -1.1  | 0.763 | -1.32 |
| 1449500_at   | Serp1nb7      | serine (or cysteine) peptidase inhibitor, clade B, member 7                     | -1.32 | 0.666 | -1.79 | 0.269 | -1.14 | 0.814 | -1.43 | 0.384 | -1.42 |
| 1436818_a_at | Msi2          | Musashi homolog 2 (Drosophila)                                                  | -1.31 | 0.18  | -1.16 | 0.406 | -1.75 | 0.045 | -2.03 | 0.002 | -1.56 |
| 1439818_at   | AI931714      | expressed sequence AI931714                                                     | -1.44 | 0.186 | -1.14 | 0.668 | -1.61 | 0.157 | -1.36 | 0.194 | -1.39 |
| 1432106_at   | 6530403M18Rik | RIKEN cDNA 6530403M18 gene                                                      | -1.31 | 0.624 | -1.42 | 0.598 | -1.38 | 0.51  | -1.34 | 0.39  | -1.36 |
| 1445794_at   | Spag16        | Sperm associated antigen 16                                                     | -1.11 | 0.816 | -1.34 | 0.617 | -1.83 | 0.194 | -2.46 | 0.16  | -1.68 |
| 1450836_at   | Neurog1       | neurogenin 1                                                                    | -1.65 | 0.061 | -1.2  | 0.765 | -1.33 | 0.655 | -1.27 | 0.695 | -1.36 |
| 1440092_at   | Ext1          | Exostoses (multiple) 1                                                          | -1.16 | 0.346 | -1.16 | 0.494 | -2.17 | 0.006 | -1.01 | 0.939 | -1.37 |
| 1455203_at   | A930003A15Rik | RIKEN cDNA A930003A15 gene                                                      | -2.05 | 0.323 | -1.19 | 0.793 | -1.16 | 0.764 | -1.27 | 0.438 | -1.42 |

|              |                    |                                                                                    |       |       |       |       |       |       |       |       |       |
|--------------|--------------------|------------------------------------------------------------------------------------|-------|-------|-------|-------|-------|-------|-------|-------|-------|
| 1443649_at   | Huwe1              | HECT, UBA and WWE domain containing 1                                              | -1.3  | 0.19  | -1.34 | 0.23  | -1.48 | 0.107 | -1.3  | 0.371 | -1.35 |
| 1441588_at   | Kcnq1ot1           | KCNQ1 overlapping transcript 1                                                     | -2.13 | 0.141 | -1.09 | 0.903 | -1.25 | 0.484 | -1.29 | 0.649 | -1.44 |
| 1445432_at   | ---                | ---                                                                                | -1.18 | 0.684 | -1.06 | 0.796 | -2.51 | 0.209 | -1.53 | 0.158 | -1.57 |
| 1441859_x_at | Ccdc64             | Coiled-coil domain containing 64                                                   | -1.25 | 0.707 | -1.46 | 0.349 | -1.41 | 0.384 | -3.48 | 0.007 | -1.9  |
| 1450079_at   | Nrk                | Nik related kinase                                                                 | -1.82 | 0.253 | -1.11 | 0.63  | -1.35 | 0.53  | -1.47 | 0.507 | -1.44 |
| 1443011_at   | Prmt7              | protein arginine N-methyltransferase 7                                             | -3.14 | 0.14  | -1.06 | 0.853 | -1.07 | 0.857 | -1.41 | 0.397 | -1.67 |
| 1419950_s_at | Tnpo3              | transportin 3                                                                      | -2.09 | 0.342 | -1.25 | 0.535 | -1.09 | 0.827 | -1.84 | 0.292 | -1.57 |
| 1430043_at   | Ttc19              | tetratricopeptide repeat domain 19                                                 | -1.3  | 0.483 | -1.23 | 0.178 | -1.65 | 0.015 | -1.19 | 0.516 | -1.34 |
| 1444936_at   | D5ErtD566e         | DNA segment, Chr 5, ERATO Doi 566, expressed                                       | -2.37 | 0.125 | -1.26 | 0.365 | -1.02 | 0.923 | -1.03 | 0.92  | -1.42 |
| 1452958_at   | Asphd2             | aspartate beta-hydroxylase domain containing 2                                     | -1.28 | 0.703 | -1.82 | 0.166 | -1.16 | 0.468 | -1.26 | 0.476 | -1.38 |
| 1438802_at   | Foxp1              | Forkhead box P1                                                                    | -1.37 | 0.366 | -1.23 | 0.384 | -1.54 | 0.166 | -2.58 | 0.091 | -1.68 |
| 1432387_at   | Pgcp               | plasma glutamate carboxypeptidase                                                  | -2.63 | 0.044 | -1.17 | 0.456 | -1.04 | 0.943 | -1.91 | 0.342 | -1.69 |
| 1445178_at   | Sh3rf1             | SH3 domain containing ring finger 1                                                | -1.01 | 0.969 | -1.3  | 0.33  | -2.27 | 0.061 | -1.82 | 0.144 | -1.6  |
| 1458879_at   | C76798             | expressed sequence C76798                                                          | -1.42 | 0.105 | -1.66 | 0.202 | -1.12 | 0.56  | -1.43 | 0.161 | -1.41 |
| 1445838_at   | Galnt5             | UDP-N-acetyl-alpha-D-galactosamine:polypeptide N-acetylglactosaminyltransferase 5  | -1.08 | 0.237 | -2.52 | 0.076 | -1.15 | 0.689 | -1.9  | 0.379 | -1.66 |
| 1434494_at   | Zar1               | zygote arrest 1                                                                    | -1.26 | 0.416 | -1.48 | 0.089 | -1.37 | 0.348 | -1.4  | 0.623 | -1.38 |
| 1458716_at   | Dusp27             | dual specificity phosphatase 27 (putative)                                         | -1.4  | 0.635 | -1.38 | 0.352 | -1.33 | 0.23  | -2.25 | 0.108 | -1.59 |
| 1431528_at   | 5830427D02Rik      | RIKEN cDNA 5830427D02 gene                                                         | -1.31 | 0.355 | -1.25 | 0.066 | -1.59 | 0.032 | -1.61 | 0.123 | -1.44 |
| 1455648_at   | LOC278757 /// LOC  | similar to reduced expression 2 /// similar to reduced expression 2                | -1.47 | 0.268 | -1.19 | 0.466 | -1.49 | 0.049 | -1.45 | 0.233 | -1.4  |
| 1441243_at   | Zfp532             | Zinc finger protein 532                                                            | -1.28 | 0.429 | -1.6  | 0.046 | -1.27 | 0.263 | -1.14 | 0.511 | -1.32 |
| 1455680_at   | 9630025H16Rik      | RIKEN cDNA 9630025H16 gene                                                         | -1.19 | 0.136 | -1.48 | 0.057 | -1.48 | 0.073 | -1.51 | 0.013 | -1.41 |
| 1447838_x_at | Eml4               | echinoderm microtubule associated protein like 4                                   | -1.77 | 0.116 | -1.22 | 0.665 | -1.23 | 0.332 | -1.36 | 0.274 | -1.4  |
| 1460616_at   | Slco4c1            | solute carrier organic anion transporter family, member 4C1                        | -1.09 | 0.858 | -1.57 | 0.204 | -1.57 | 0.203 | -1.16 | 0.889 | -1.35 |
| 1453676_at   | A930041D05Rik      | RIKEN cDNA A930041D05 gene                                                         | -1.31 | 0.157 | -1.27 | 0.481 | -1.56 | 0.2   | -1.26 | 0.347 | -1.35 |
| 1437170_x_at | Pdlim1 /// LOC5457 | PDZ and LIM domain 1 (elfin) /// similar to PDZ and LIM domain protein 1 (Elfin) ( | -1.25 | 0.623 | -1.59 | 0.381 | -1.3  | 0.653 | -2.93 | 0.014 | -1.77 |
| 1453844_at   | Chit1              | chitinase 1 (chitotriosidase)                                                      | -2.13 | 0.45  | -1.3  | 0.426 | -1.04 | 0.891 | -2.75 | 0.009 | -1.81 |
| 1420514_at   | Tmem47             | Transmembrane protein 47                                                           | -1.26 | 0.551 | -1.05 | 0.324 | -2.21 | 0.001 | -2.18 | 0.129 | -1.67 |
| 1451855_at   | Bcl7a              | B-cell CLL/lymphoma 7A                                                             | -1.38 | 0.581 | -1.97 | 0.258 | -1.04 | 0.958 | -1.53 | 0.474 | -1.48 |
| 1436876_at   | D13Bwg1146e        | DNA segment, Chr 13, Brigham & Women's Genetics 1146 expressed                     | -1.6  | 0.047 | -1.4  | 0.058 | -1.17 | 0.126 | -1.78 | 0.179 | -1.49 |
| 1458221_at   | G630014P10Rik      | RIKEN cDNA G630014P10 gene                                                         | -1.35 | 0.234 | -1.52 | 0.068 | -1.25 | 0.04  | -1.38 | 0.244 | -1.38 |
| 1457592_x_at | 2210018M03Rik      | RIKEN cDNA 2210018M03 gene                                                         | -1.39 | 0.287 | -2.08 | 0.002 | -1.01 | 0.978 | -1.21 | 0.299 | -1.42 |
| 1456638_at   | Wdr59              | WD repeat domain 59                                                                | -1.52 | 0.046 | -1.27 | 0.063 | -1.32 | 0.238 | -1.15 | 0.398 | -1.32 |
| 1422226_at   | ---                | ---                                                                                | -1.06 | 0.838 | -1.7  | 0.444 | -1.5  | 0.097 | -1.16 | 0.798 | -1.35 |
| 1440219_at   | Cspp1              | Centrosome and spindle pole associated protein 1                                   | -1.32 | 0.214 | -1.15 | 0.371 | -1.75 | 0.022 | -1.22 | 0.068 | -1.36 |
| 1455877_a_at | Nanos1             | nanos homolog 1 (Drosophila)                                                       | -1.5  | 0.662 | -1.16 | 0.71  | -1.49 | 0.155 | -1.04 | 0.844 | -1.3  |
| 1440651_at   | Dusp16             | Dual specificity phosphatase 16                                                    | -1.02 | 0.888 | -1.67 | 0.03  | -1.61 | 0.132 | -1.69 | 0.038 | -1.5  |
| 1430910_at   | 4930544L04Rik      | RIKEN cDNA 4930544L04 gene                                                         | -2.14 | 0.512 | -1.22 | 0.667 | -1.1  | 0.512 | -1.93 | 0.378 | -1.6  |
| 1422646_at   | Mga                | MAX gene associated                                                                | -1.69 | 0.221 | -1.23 | 0.404 | -1.26 | 0.212 | -1    | 0.987 | -1.3  |
| 1441155_at   | 2810446P07Rik      | RIKEN cDNA 2810446P07 gene                                                         | -1.37 | 0.054 | -1.14 | 0.46  | -1.69 | 0.043 | -1.23 | 0.325 | -1.36 |
| 1444551_at   | Itpr2              | Inositol 1,4,5-triphosphate receptor 2                                             | -1.32 | 0.193 | -1.16 | 0.601 | -1.72 | 0.376 | -1.47 | 0.263 | -1.42 |
| 1449796_at   | Prph1              | Peripherin 1                                                                       | -1.2  | 0.69  | -1.71 | 0.339 | -1.29 | 0.724 | -1.09 | 0.847 | -1.32 |
| 1421703_at   | Zfp59              | zinc finger protein 59                                                             | -1.15 | 0.477 | -2.18 | 0.075 | -1.15 | 0.581 | -1.05 | 0.865 | -1.38 |
| 1451933_a_at | Cts7               | cathepsin 7                                                                        | -1.37 | 0.412 | -1.93 | 0.34  | -1.05 | 0.786 | -1.02 | 0.931 | -1.34 |
| 1447555_at   | Utrn               | Utrophin                                                                           | -1.08 | 0.862 | -1.15 | 0.564 | -2.47 | 0.003 | -1.51 | 0.135 | -1.55 |
| 1454456_at   | 6530413G14Rik      | RIKEN cDNA 6530413G14 gene                                                         | -1.48 | 0.415 | -1.28 | 0.165 | -1.35 | 0.425 | -1.25 | 0.547 | -1.34 |
| 1432352_at   | 5730405I09Rik      | RIKEN cDNA 5730405I09 gene                                                         | -1.16 | 0.055 | -1.12 | 0.203 | -2.24 | 0.008 | -1.59 | 0.151 | -1.53 |
| 1421420_at   | Ccr10              | chemokine (C-C motif) receptor 10                                                  | -1.54 | 0.254 | -1.06 | 0.932 | -1.65 | 0.452 | -1.77 | 0.212 | -1.51 |
| 1437420_at   | Baz1b              | bromodomain adjacent to zinc finger domain, 1B                                     | -1.37 | 0.275 | -1.1  | 0.863 | -1.79 | 0.156 | -1.12 | 0.879 | -1.34 |
| 1454919_at   | AU044698           | Expressed sequence AU044698                                                        | -1.19 | 0.152 | -1.46 | 0.079 | -1.48 | 0.007 | -1.06 | 0.695 | -1.3  |
| 1435639_at   | 2610528A11Rik      | RIKEN cDNA 2610528A11 gene                                                         | -1.01 | 0.965 | -3.14 | 0.037 | -1.12 | 0.131 | -1.53 | 0.48  | -1.7  |
| 1427724_at   | Top2a              | topoisomerase (DNA) II alpha                                                       | -1.33 | 0.477 | -1.56 | 0.017 | -1.23 | 0.315 | -1.13 | 0.229 | -1.32 |
| 1457591_at   | Nol10              | Nucleolar protein 10                                                               | -1.15 | 0.537 | -1.75 | 0.042 | -1.31 | 0.379 | -1.51 | 0.131 | -1.43 |
| 1422091_at   | Pfkfb2             | 6-phosphofructo-2-kinase/fructose-2,6-biphosphatase 2                              | -1.56 | 0.298 | -1.64 | 0.395 | -1.05 | 0.871 | -1.64 | 0.275 | -1.47 |

|              |                       |                                                                                       |       |       |       |       |       |       |       |       |       |
|--------------|-----------------------|---------------------------------------------------------------------------------------|-------|-------|-------|-------|-------|-------|-------|-------|-------|
| 1446014_at   | ---                   | ---                                                                                   | -1.17 | 0.216 | -1.49 | 0.056 | -1.48 | 0.024 | -1.12 | 0.596 | -1.32 |
| 1426073_at   | Twsg1                 | twisted gastrulation homolog 1 (Drosophila)                                           | -1.19 | 0.321 | -1.89 | 0.223 | -1.2  | 0.352 | -1.07 | 0.837 | -1.34 |
| 1458564_at   | ---                   | ---                                                                                   | -1.4  | 0.485 | -1.04 | 0.874 | -1.9  | 0.033 | -1.6  | 0.505 | -1.49 |
| 1419313_at   | Ccnt1                 | cyclin T1                                                                             | -1.19 | 0.017 | -1.25 | 0.333 | -1.79 | 0.05  | -1.06 | 0.837 | -1.32 |
| 1447505_at   | 1700020G03Rik         | RIKEN cDNA 1700020G03 gene                                                            | -1.71 | 0.221 | -1.11 | 0.731 | -1.39 | 0.175 | -1.45 | 0.408 | -1.42 |
| 1440563_at   | 2010111I01Rik         | RIKEN cDNA 2010111I01 gene                                                            | -1.09 | 0.831 | -1.3  | 0.468 | -1.94 | 0.028 | -1.21 | 0.362 | -1.39 |
| 1433140_a_at | Btbd14b               | BTB (POZ) domain containing 14B                                                       | -1.76 | 0.291 | -1.02 | 0.96  | -1.52 | 0.571 | -1    | 0.982 | -1.33 |
| 1458220_at   | Dlc1                  | deleted in liver cancer 1                                                             | -1.16 | 0.59  | -1.07 | 0.847 | -2.48 | 0.063 | -1.18 | 0.555 | -1.47 |
| 1422357_at   | Magea6                | melanoma antigen, family A, 6                                                         | -1.06 | 0.948 | -2.09 | 0.29  | -1.28 | 0.631 | -1.66 | 0.527 | -1.52 |
| 1429898_at   | 2310008M10Rik         | RIKEN cDNA 2310008M10 gene                                                            | -1.19 | 0.616 | -1.51 | 0.087 | -1.44 | 0.139 | -1.12 | 0.246 | -1.31 |
| 1443468_at   | ---                   | ---                                                                                   | -1.38 | 0.165 | -1.15 | 0.559 | -1.66 | 0.113 | -1.5  | 0.184 | -1.42 |
| 1438814_at   | ---                   | ---                                                                                   | -1.43 | 0.111 | -1.28 | 0.178 | -1.38 | 0.453 | -1.37 | 0.292 | -1.37 |
| 1456924_at   | AW492981              | expressed sequence AW492981                                                           | -1.28 | 0.498 | -1.89 | 0.285 | -1.12 | 0.557 | -1.21 | 0.59  | -1.37 |
| 1456550_at   | ---                   | ---                                                                                   | -1.23 | 0.209 | -1.4  | 0.481 | -1.49 | 0.195 | -1.01 | 0.986 | -1.28 |
| 1448329_at   | Adam3                 | a disintegrin and metallopeptidase domain 3 (cyritestin)                              | -1.26 | 0.528 | -1.33 | 0.35  | -1.52 | 0.291 | -1.08 | 0.826 | -1.3  |
| 1459343_at   | 2700008B19Rik         | RIKEN cDNA 2700008B19 gene                                                            | -2.12 | 0.197 | -1.3  | 0.445 | -1.04 | 0.887 | -1.17 | 0.713 | -1.41 |
| 1435392_at   | Wdr17                 | WD repeat domain 17                                                                   | -1.26 | 0.691 | -1.99 | 0.253 | -1.1  | 0.876 | -3.07 | 0.375 | -1.86 |
| 1437916_at   | ---                   | ---                                                                                   | -1.49 | 0.414 | -1.14 | 0.458 | -1.53 | 0.067 | -1.42 | 0.018 | -1.39 |
| 1421079_at   | Nr4a3                 | nuclear receptor subfamily 4, group A, member 3                                       | -1.33 | 0.568 | -1.32 | 0.684 | -1.44 | 0.478 | -1.81 | 0.24  | -1.48 |
| 1447653_x_at | Rpl24 /// LOC62495    | ribosomal protein L24 /// similar to ribosomal protein L24 /// similar to ribosomal p | -1.17 | 0.514 | -1.53 | 0.005 | -1.45 | 0.234 | -1.24 | 0.169 | -1.34 |
| 1422354_at   | Olfir544              | olfactory receptor 544                                                                | -1.48 | 0.38  | -1.78 | 0.153 | -1.03 | 0.918 | -2.01 | 0.09  | -1.58 |
| 1458704_at   | ---                   | Transcribed locus, moderately similar to NP_663461.2 membrane-associated ring         | -1.23 | 0.269 | -1.23 | 0.628 | -1.73 | 0.206 | -2.23 | 0.172 | -1.6  |
| 1457228_x_at | Gle1l                 | GLE1 RNA export mediator-like (yeast                                                  | -1.3  | 0.165 | -1.16 | 0.493 | -1.75 | 0.081 | -1.79 | 0.151 | -1.5  |
| 1427522_at   | Arhgap20              | Rho GTPase activating protein 20                                                      | -1.46 | 0.65  | -1.05 | 0.94  | -1.75 | 0.002 | -1.47 | 0.508 | -1.43 |
| 1445204_at   | Ccdc85a               | Coiled-coil domain containing 85A                                                     | -1.12 | 0.452 | -1.27 | 0.57  | -1.89 | 0.149 | -1.55 | 0.263 | -1.46 |
| 1457781_at   | Kcnq1ot1              | KCNQ1 overlapping transcript 1                                                        | -1.28 | 0.15  | -1.08 | 0.57  | -2.02 | 0.014 | -1.46 | 0.004 | -1.46 |
| 1430902_at   | Ankrd24               | ankyrin repeat domain 24                                                              | -1.02 | 0.929 | -1.23 | 0.631 | -2.43 | 0.041 | -1.83 | 0.051 | -1.63 |
| 1447951_at   | 5730403B10Rik         | RIKEN cDNA 5730403B10 gene                                                            | -1.07 | 0.88  | -1.38 | 0.318 | -1.84 | 0.087 | -1.43 | 0.264 | -1.43 |
| 1422960_at   | Srd5a2                | steroid 5 alpha-reductase 2                                                           | -1.22 | 0.032 | -1    | 0.988 | -2.59 | 0.066 | -1.18 | 0.782 | -1.5  |
| 1445026_at   | Acvr2a                | Activin receptor IIA                                                                  | -1.92 | 0.125 | -1.06 | 0.902 | -1.34 | 0.6   | -1.14 | 0.729 | -1.37 |
| 1447339_at   | ---                   | Transcribed locus                                                                     | -1.16 | 0.625 | -1.68 | 0.447 | -1.34 | 0.227 | -1.7  | 0.263 | -1.47 |
| 1421021_at   | ---                   | ---                                                                                   | -1.01 | 0.926 | -1.58 | 0.184 | -1.7  | 0.052 | -1.72 | 0.177 | -1.51 |
| 1437426_at   | Wac                   | WW domain containing adaptor with coiled-coil                                         | -1.25 | 0.129 | -1.25 | 0.127 | -1.66 | 0.009 | -1.08 | 0.137 | -1.31 |
| 1448125_at   | Rit2                  | Ras-like without CAAX 2                                                               | -1.3  | 0.787 | -1.72 | 0.046 | -1.17 | 0.75  | -1.96 | 0.221 | -1.54 |
| 1432010_at   | 4933408N05Rik         | RIKEN cDNA 4933408N05 gene                                                            | -1.3  | 0.762 | -1.69 | 0.146 | -1.19 | 0.337 | -1.72 | 0.305 | -1.47 |
| 1422402_a_at | Asz1                  | ankyrin repeat, SAM and basic leucine zipper domain containing 1                      | -1.49 | 0.29  | -1.47 | 0.395 | -1.17 | 0.57  | -1.22 | 0.67  | -1.34 |
| 1418091_at   | Tcfcp2l1              | transcription factor CP2-like 1                                                       | -1.31 | 0.143 | -1.16 | 0.66  | -1.72 | 0.061 | -1.27 | 0.615 | -1.37 |
| 1446815_at   | Zcsl3                 | Zinc finger, CSL-type containing 3                                                    | -1.21 | 0.658 | -1.3  | 0.21  | -1.62 | 0.048 | -1.65 | 0.254 | -1.45 |
| 1441618_at   | Arhgap29              | Rho GTPase activating protein 29                                                      | -1.39 | 0.247 | -1.03 | 0.911 | -1.94 | 0.005 | -1.1  | 0.748 | -1.36 |
| 1446840_at   | Thrap1                | Thyroid hormone receptor associated protein 1                                         | -1.27 | 0.142 | -1.32 | 0.484 | -1.51 | 0.071 | -1.29 | 0.289 | -1.35 |
| 1450824_at   | Ptch1                 | patched homolog 1                                                                     | -1.28 | 0.742 | -1.6  | 0.018 | -1.25 | 0.579 | -1.94 | 0.249 | -1.52 |
| 1440162_x_at | A630043P06            | hypothetical protein A630043P06                                                       | -1.46 | 0.147 | -1.45 | 0.407 | -1.21 | 0.654 | -3.38 | 0.04  | -1.87 |
| 1453917_at   | Ifitm7                | interferon induced transmembrane protein 7                                            | -1.39 | 0.328 | -1.37 | 0.589 | -1.32 | 0.074 | -1.3  | 0.461 | -1.34 |
| 1456661_at   | Jarid2                | Jumonji, AT rich interactive domain 2                                                 | -1.47 | 0.042 | -1.17 | 0.333 | -1.49 | 0.068 | -1.69 | 0.044 | -1.46 |
| 1443263_at   | Bach2                 | BTB and CNC homology 2                                                                | -1.08 | 0.669 | -1.4  | 0.369 | -1.77 | 0.062 | -3.87 | 0.039 | -2.03 |
| 1422682_s_at | Prss3 /// Prss1 /// L | protease, serine, 3 /// protease, serine, 1 (trypsin 1) /// trypsinogen 12            | -1.16 | 0.728 | -1.66 | 0.562 | -1.36 | 0.585 | -3.1  | 0.422 | -1.82 |
| 1456787_at   | ---                   | ---                                                                                   | -1.15 | 0.423 | -1.18 | 0.495 | -2.05 | 0.053 | -1.92 | 0.199 | -1.57 |
| 1454426_at   | 4930519E07Rik         | RIKEN cDNA 4930519E07 gene                                                            | -1.03 | 0.973 | -1.89 | 0.358 | -1.42 | 0.527 | -1.18 | 0.549 | -1.38 |
| 1457489_at   | Eif4e                 | Eukaryotic translation initiation factor 4E                                           | -1.4  | 0.33  | -1.14 | 0.689 | -1.63 | 0.028 | -1.31 | 0.033 | -1.37 |
| 1416117_at   | Orc3l                 | origin recognition complex, subunit 3-like (S. cerevisiae)                            | -1.09 | 0.837 | -1.88 | 0.045 | -1.31 | 0.184 | -1.46 | 0.139 | -1.44 |
| 1422644_at   | Sh3bgr                | SH3-binding domain glutamic acid-rich protein                                         | -1.07 | 0.864 | -1.66 | 0.281 | -1.5  | 0.296 | -1.06 | 0.753 | -1.32 |
| 1449590_a_at | Mras                  | muscle and microspikes RAS                                                            | -1.01 | 0.951 | -1.95 | 0.129 | -1.42 | 0.015 | -1.75 | 0.043 | -1.53 |
| 1446365_at   | Vti1a                 | vesicle transport through interaction with t-SNAREs homolog 1A (yeast)                | -1.36 | 0.127 | -1.23 | 0.182 | -1.51 | 0.002 | -1.15 | 0.391 | -1.31 |

|              |                      |                                                                                 |       |       |       |       |       |       |       |       |       |
|--------------|----------------------|---------------------------------------------------------------------------------|-------|-------|-------|-------|-------|-------|-------|-------|-------|
| 1430200_at   | 4930579D07Rik        | RIKEN cDNA 4930579D07 gene                                                      | -1.97 | 0.543 | -1.21 | 0.698 | -1.14 | 0.717 | -1.25 | 0.744 | -1.39 |
| 1440137_at   | Bcl11b               | B-cell leukemia/lymphoma 11B                                                    | -1.97 | 0.553 | -1.13 | 0.24  | -1.23 | 0.333 | -2.11 | 0.235 | -1.61 |
| 1441839_s_at | BC024814             | cDNA sequence BC024814                                                          | -1.87 | 0.12  | -1.34 | 0.405 | -1.08 | 0.664 | -1.45 | 0.165 | -1.43 |
| 1440685_at   | Calcr1               | Calcitonin receptor-like                                                        | -1.36 | 0.182 | -1.32 | 0.431 | -1.4  | 0.478 | -1.32 | 0.091 | -1.35 |
| 1419166_at   | Slc5a2               | solute carrier family 5 (sodium/glucose cotransporter), member 2                | -1.21 | 0.053 | -2.05 | 0.269 | -1.12 | 0.278 | -1.89 | 0.496 | -1.57 |
| 1453397_at   | 9130016M20Rik        | RIKEN cDNA 9130016M20 gene                                                      | -1.31 | 0.021 | -1.1  | 0.498 | -1.87 | 0.122 | -1.36 | 0.541 | -1.41 |
| 1430827_a_at | Ptk2                 | PTK2 protein tyrosine kinase 2                                                  | -1.37 | 0.612 | -1.6  | 0.065 | -1.17 | 0.783 | -1.1  | 0.831 | -1.31 |
| 1423380_s_at | Nfatc4               | nuclear factor of activated T-cells, cytoplasmic, calcineurin-dependent 4       | -1.21 | 0.138 | -1.58 | 0.057 | -1.33 | 0.253 | -1.43 | 0.099 | -1.39 |
| 1445835_at   | ---                  | Transcribed locus                                                               | -1.95 | 0.052 | -1.18 | 0.737 | -1.18 | 0.684 | -1.01 | 0.984 | -1.33 |
| 1438595_at   | Gm546                | gene model 546, (NCBI)                                                          | -1.85 | 0.008 | -1.43 | 0.236 | -1.03 | 0.842 | -1.34 | 0.342 | -1.41 |
| 1423253_at   | Mpz                  | myelin protein zero                                                             | -1.93 | 0.361 | -1.15 | 0.687 | -1.22 | 0.603 | -1.95 | 0.532 | -1.56 |
| 1450374_at   | Tfp39                | tuberoinfundibular peptide of 39 residues (TIP39) preprohormone                 | -2.46 | 0.026 | -1.01 | 0.991 | -1.23 | 0.614 | -3.81 | 0.255 | -2.13 |
| 1444343_at   | A130064L14Rik        | RIKEN cDNA A130064L14 gene                                                      | -1.24 | 0.221 | -1.07 | 0.794 | -2.13 | 0.001 | -1.94 | 0.06  | -1.59 |
| 1426357_at   | Taok1                | TAO kinase 1                                                                    | -1.37 | 0.022 | -1.31 | 0.061 | -1.39 | 0.059 | -1.06 | 0.779 | -1.28 |
| 1459624_at   | ---                  | ---                                                                             | -1.14 | 0.543 | -1.4  | 0.702 | -1.62 | 0.508 | -1.17 | 0.735 | -1.33 |
| 1447213_at   | Sp100                | Nuclear antigen Sp100                                                           | -1.15 | 0.401 | -1.63 | 0.06  | -1.37 | 0.283 | -1.9  | 0.08  | -1.51 |
| 1427317_at   | Kin                  | antigenic determinant of rec-A protein                                          | -1.7  | 0.141 | -1.22 | 0.305 | -1.24 | 0.034 | -1.01 | 0.955 | -1.29 |
| 1456832_at   | Atrx                 | Alpha thalassemia/mental retardation syndrome X-linked homolog (human)          | -1.49 | 0.049 | -1.11 | 0.749 | -1.56 | 0.024 | -1.31 | 0.211 | -1.37 |
| 1453611_at   | Rbbp6                | retinoblastoma binding protein 6                                                | -1.73 | 0.14  | -1.5  | 0.222 | -1.04 | 0.899 | -2.41 | 0.278 | -1.67 |
| 1458928_at   | ---                  | ---                                                                             | -1.32 | 0.056 | -1.16 | 0.739 | -1.7  | 0.324 | -1.63 | 0.427 | -1.45 |
| 1460622_x_at | Wdr18                | WD repeat domain 18                                                             | -1.79 | 0.053 | -1.37 | 0.314 | -1.09 | 0.76  | -1.34 | 0.129 | -1.4  |
| 1432370_at   | 4933411E02Rik        | RIKEN cDNA 4933411E02 gene                                                      | -1.22 | 0.639 | -1.83 | 0.277 | -1.19 | 0.609 | -2.47 | 0.239 | -1.68 |
| 1436918_at   | Dyrk2                | dual-specificity tyrosine-(Y)-phosphorylation regulated kinase 2                | -1.37 | 0.037 | -1.31 | 0.109 | -1.39 | 0.056 | -1.72 | 0.108 | -1.45 |
| 1431040_at   | 6530401N04Rik ///    | RIKEN cDNA 6530401N04 gene ///<br>hypothetical protein LOC638977                | -1.27 | 0.645 | -1.14 | 0.797 | -1.84 | 0.307 | -1.03 | 0.917 | -1.32 |
| 1442706_at   | Nelf                 | nasal embryonic LHRH factor                                                     | -1.6  | 0.156 | -1.02 | 0.972 | -1.64 | 0.395 | -2.31 | 0.373 | -1.64 |
| 1438336_at   | Fbxw11               | F-box and WD-40 domain protein 11                                               | -1.35 | 0.361 | -1.38 | 0.411 | -1.34 | 0.229 | -1.23 | 0.134 | -1.32 |
| 1416515_at   | Fscn1                | fascin homolog 1, actin bundling protein (Strongylocentrotus purpuratus)        | -1.95 | 0.315 | -1.01 | 0.992 | -1.41 | 0.4   | -1.27 | 0.359 | -1.41 |
| 1420702_at   | 1700093K21Rik        | RIKEN cDNA 1700093K21 gene                                                      | -1.22 | 0.858 | -1.07 | 0.911 | -2.2  | 0.132 | -1.28 | 0.318 | -1.44 |
| 1457056_at   | Ftcd                 | Formiminotransferase cyclodeaminase                                             | -1.07 | 0.767 | -1.47 | 0.534 | -1.67 | 0.066 | -1.67 | 0.499 | -1.47 |
| 1421706_at   | Mmp20                | matrix metalloproteinase 20 (enamelysin)                                        | -1.59 | 0.073 | -1.5  | 0.064 | -1.09 | 0.832 | -1.09 | 0.863 | -1.32 |
| 1451779_at   | BC027061             | cDNA sequence BC027061                                                          | -1.47 | 0.381 | -1.02 | 0.832 | -1.81 | 0.061 | -2.22 | 0.151 | -1.63 |
| 1457605_at   | Atxn1                | Ataxin 1                                                                        | -1.13 | 0.691 | -1.37 | 0.257 | -1.67 | 0.018 | -1.51 | 0.144 | -1.42 |
| 1449652_at   | Nudcd1               | NudC domain containing 1                                                        | -1.29 | 0.539 | -1.48 | 0.187 | -1.3  | 0.443 | -1.2  | 0.749 | -1.32 |
| 1452321_at   | Brwd1                | bromodomain and WD repeat domain containing 1                                   | -1.05 | 0.801 | -1.28 | 0.057 | -2.07 | 0.011 | -2.5  | 0.058 | -1.73 |
| 1434368_at   | 1700008K24Rik        | RIKEN cDNA 1700008K24 gene                                                      | -2.47 | 0.214 | -1.23 | 0.489 | -1.01 | 0.982 | -1.18 | 0.775 | -1.47 |
| 1446697_at   | ---                  | ---                                                                             | -1.07 | 0.84  | -1.47 | 0.493 | -1.67 | 0.154 | -1.08 | 0.84  | -1.32 |
| 1460326_at   | Plk3ca               | phosphatidylinositol 3-kinase, catalytic, alpha polypeptide                     | -1.22 | 0.01  | -1.26 | 0.144 | -1.66 | 0.05  | -1.21 | 0.296 | -1.34 |
| 1425905_at   | ---                  | ---                                                                             | -1.16 | 0.868 | -1.29 | 0.684 | -1.72 | 0.274 | -1.99 | 0.144 | -1.54 |
| 1439687_at   | Rab14                | RAB14, member RAS oncogene family                                               | -1.22 | 0.302 | -1.3  | 0     | -1.6  | 0.112 | -1.38 | 0.234 | -1.37 |
| 1439949_at   | Gsk3b                | Glycogen synthase kinase 3 beta                                                 | -1.11 | 0.702 | -1.29 | 0.438 | -1.85 | 0.005 | -1.04 | 0.273 | -1.32 |
| 1455032_at   | 9630037P07Rik        | RIKEN cDNA 9630037P07 gene                                                      | -1.14 | 0.148 | -1.51 | 0.074 | -1.47 | 0.031 | -1.11 | 0.383 | -1.31 |
| 1423104_at   | Irs1                 | insulin receptor substrate 1                                                    | -1.16 | 0.153 | -1.34 | 0.228 | -1.64 | 0.156 | -1.71 | 0.142 | -1.46 |
| 1425673_at   | Lpp                  | LIM domain containing preferred translocation partner in lipoma                 | -1.11 | 0.435 | -1.18 | 0.261 | -2.15 | 0.015 | -1.69 | 0.184 | -1.53 |
| 1445965_at   | ---                  | ---                                                                             | -1.18 | 0.339 | -1.07 | 0.797 | -2.3  | 0.116 | -1.09 | 0.796 | -1.41 |
| 1430683_at   | Dock6 ///<br>LOC6700 | dedicator of cytokinesis 6 ///<br>similar to Dedicator of cytokinesis protein 6 | -1.23 | 0.289 | -1.28 | 0.387 | -1.61 | 0.097 | -1.5  | 0.266 | -1.4  |
| 1443736_at   | Ttll10               | Tubulin tyrosine ligase-like family, member 10                                  | -1.27 | 0.362 | -1.13 | 0.878 | -1.84 | 0.153 | -1.72 | 0.519 | -1.49 |
| 1436084_at   | Scrt1                | scratch homolog 1, zinc finger protein (Drosophila)                             | -1.52 | 0.151 | -1.45 | 0.299 | -1.15 | 0.797 | -1.57 | 0.474 | -1.42 |
| 1458116_at   | 9530079D04Rik        | RIKEN cDNA 9530079D04 gene                                                      | -1.19 | 0.825 | -1.8  | 0.275 | -1.21 | 0.474 | -2.09 | 0.065 | -1.57 |
| 1458335_x_at | 2900073H19Rik        | RIKEN cDNA 2900073H19 gene                                                      | -1.26 | 0.254 | -1.57 | 0.301 | -1.28 | 0.586 | -2.01 | 0.161 | -1.53 |
| 1430665_at   | 5730480H06Rik        | RIKEN cDNA 5730480H06 gene                                                      | -1.47 | 0.008 | -1.43 | 0.104 | -1.2  | 0.191 | -1.43 | 0.183 | -1.38 |
| 1455258_at   | Kcnc2                | potassium voltage gated channel, Shaw-related subfamily, member 2               | -1.12 | 0.513 | -1.13 | 0.824 | -2.24 | 0.34  | -1.71 | 0.297 | -1.55 |
| 1450510_a_at | Cacna1a              | calcium channel, voltage-dependent, P/Q type, alpha 1A subunit                  | -1.06 | 0.569 | -2.44 | 0.099 | -1.16 | 0.485 | -1.22 | 0.253 | -1.47 |
| 1457776_at   | D9Ert720e            | DNA segment, Chr 9, ERATO Doi 720, expressed                                    | -1.48 | 0.463 | -1.15 | 0.623 | -1.48 | 0.038 | -1.35 | 0.329 | -1.37 |

|              |               |                                                                                               |       |       |       |       |       |       |       |       |       |
|--------------|---------------|-----------------------------------------------------------------------------------------------|-------|-------|-------|-------|-------|-------|-------|-------|-------|
| 1456667_at   | Hdh           | Huntington disease gene homolog                                                               | -1.5  | 0.048 | -1.51 | 0.087 | -1.12 | 0.378 | -1.09 | 0.293 | -1.31 |
| 1447371_at   | ---           | ---                                                                                           | -1.67 | 0.161 | -1.42 | 0.191 | -1.1  | 0.784 | -1.23 | 0.617 | -1.35 |
| 1434122_at   | Fbxo27        | F-box protein 27                                                                              | -1.39 | 0.51  | -1.69 | 0.048 | -1.1  | 0.493 | -1.53 | 0.046 | -1.43 |
| 1435670_at   | Tcfap2b       | transcription factor AP-2 beta                                                                | -1.2  | 0.044 | -1.12 | 0.802 | -2.04 | 0.078 | -1.15 | 0.64  | -1.38 |
| 1459567_at   | C77905        | expressed sequence C77905                                                                     | -1.25 | 0.622 | -1.6  | 0.303 | -1.25 | 0.583 | -1.49 | 0.387 | -1.4  |
| 1428815_at   | 4930583C14Rik | RIKEN cDNA 4930583C14 gene                                                                    | -1.03 | 0.962 | -1.83 | 0.343 | -1.42 | 0.117 | -1.74 | 0.386 | -1.51 |
| 1444033_at   | Anapc10       | Anaphase promoting complex subunit 10                                                         | -1.14 | 0.113 | -1.24 | 0.557 | -1.85 | 0.023 | -1.56 | 0.261 | -1.45 |
| 1433801_at   | 9930012K11Rik | RIKEN cDNA 9930012K11 gene                                                                    | -1.1  | 0.733 | -1.83 | 0.052 | -1.3  | 0.307 | -1.71 | 0.111 | -1.49 |
| 1457722_at   | Klrb1f        | killer cell lectin-like receptor subfamily B member 1F                                        | -1.72 | 0.337 | -1.27 | 0.336 | -1.17 | 0.72  | -1.43 | 0.145 | -1.4  |
| 1432906_at   | 1700126A01Rik | RIKEN cDNA 1700126A01 gene                                                                    | -1.29 | 0.707 | -1.56 | 0.421 | -1.24 | 0.47  | -2.39 | 0.204 | -1.62 |
| 1459409_at   | D130073L02Rik | RIKEN cDNA D130073L02 gene                                                                    | -1.14 | 0.036 | -1.52 | 0.222 | -1.46 | 0.062 | -1.22 | 0.558 | -1.34 |
| 1450687_at   | Igf2bp3       | insulin-like growth factor 2 mRNA binding protein 3                                           | -1.21 | 0.634 | -1    | 0.996 | -2.53 | 0.236 | -1.25 | 0.452 | -1.5  |
| 1419255_at   | Spnb2         | spectrin beta 2                                                                               | -1.13 | 0.013 | -1.24 | 0.383 | -1.89 | 0.065 | -1.47 | 0.078 | -1.43 |
| 1459756_at   | Cnot10        | CCR4-NOT transcription complex, subunit 10                                                    | -1.6  | 0.05  | -1.27 | 0.109 | -1.24 | 0.233 | -1.25 | 0.102 | -1.34 |
| 1457806_at   | Dock1         | dedicator of cyto-kinesis 1                                                                   | -1.14 | 0.476 | -1.16 | 0.372 | -2.08 | 0.071 | -1.1  | 0.713 | -1.37 |
| 1441739_at   | Ebf4          | Early B-cell factor 4                                                                         | -1.65 | 0.282 | -1.23 | 0.61  | -1.25 | 0.745 | -1.65 | 0.27  | -1.44 |
| 1446100_at   | Trp53bp1      | Transformation related protein 53 binding protein 1                                           | -2    | 0.033 | -1.26 | 0.382 | -1.08 | 0.871 | -1.12 | 0.155 | -1.36 |
| 1458400_at   | 9630050P21Rik | RIKEN cDNA 9630050P21 gene                                                                    | -1.03 | 0.714 | -1.63 | 0.052 | -1.57 | 0.033 | -1.46 | 0.224 | -1.42 |
| 1452320_at   | Lrp2          | low density lipoprotein receptor-related protein 2                                            | -1    | 0.992 | -4.28 | 0.243 | -1.01 | 0.955 | -1.18 | 0.263 | -1.87 |
| 1455126_x_at | 2310028O11Rik | RIKEN cDNA 2310028O11 gene                                                                    | -1.2  | 0.065 | -1.3  | 0.091 | -1.6  | 0.027 | -1.44 | 0.305 | -1.39 |
| 1440225_at   | Gpr116        | G protein-coupled receptor 116                                                                | -1.32 | 0.431 | -1.49 | 0.088 | -1.26 | 0.371 | -1.67 | 0.076 | -1.43 |
| 1418881_at   | Efcfb2        | EF hand calcium binding protein 2                                                             | -1.78 | 0.138 | -1.07 | 0.721 | -1.38 | 0.107 | -1.18 | 0.616 | -1.35 |
| 1435880_at   | Ankrd50       | ankrin repeat domain 50                                                                       | -1.26 | 0.481 | -1.26 | 0.003 | -1.57 | 0.029 | -1.19 | 0.395 | -1.32 |
| 1423327_at   | 4930517K11Rik | RIKEN cDNA 4930517K11 gene                                                                    | -1.19 | 0.807 | -1.84 | 0.162 | -1.19 | 0.65  | -2.16 | 0.341 | -1.6  |
| 1444872_at   | D3Ert740e     | DNA segment, Chr 3, ERATO Doi 740, expressed                                                  | -1.09 | 0.791 | -1.51 | 0.137 | -1.55 | 0.037 | -1.11 | 0.625 | -1.32 |
| 1430069_at   | 4921517L17Rik | RIKEN cDNA 4921517L17 gene                                                                    | -1.58 | 0.325 | -1.15 | 0.671 | -1.38 | 0.254 | -1.24 | 0.569 | -1.34 |
| 1421305_x_at | Rabep1        | rabaptin, RAB GTPase binding effector protein 1                                               | -1.27 | 0.217 | -1.46 | 0.001 | -1.33 | 0.18  | -1.5  | 0.078 | -1.39 |
| 1458615_at   | Depdc5        | DEP domain containing 5                                                                       | -1.47 | 0.2   | -1.49 | 0.07  | -1.15 | 0.769 | -1.24 | 0.564 | -1.34 |
| 1454536_at   | 4933401B01Rik | RIKEN cDNA 4933401B01 gene                                                                    | -1.29 | 0.05  | -1.53 | 0.498 | -1.26 | 0.144 | -1.52 | 0.032 | -1.4  |
| 1432828_at   | ---           | ---                                                                                           | -1.62 | 0.187 | -1.45 | 0.148 | -1.09 | 0.864 | -1.35 | 0.512 | -1.38 |
| 1421658_x_at | Psg18         | pregnancy specific glycoprotein 18                                                            | -1.65 | 0.233 | -1.07 | 0.886 | -1.47 | 0.455 | -1.82 | 0.321 | -1.5  |
| 1431393_at   | Six6os1       | Six6 opposite strand transcript 1                                                             | -1.66 | 0.198 | -1.01 | 0.992 | -1.59 | 0.441 | -1.29 | 0.554 | -1.39 |
| 1453858_at   | Slc35a2       | solute carrier family 35 (UDP-galactose transporter), member 2                                | -1.06 | 0.778 | -1.51 | 0.224 | -1.62 | 0.082 | -1.01 | 0.954 | -1.3  |
| 1444475_at   | ---           | ---                                                                                           | -1.71 | 0.085 | -1.03 | 0.781 | -1.5  | 0.525 | -1.35 | 0.638 | -1.4  |
| 1447902_at   | 1810013A23Rik | RIKEN cDNA 1810013A23 gene                                                                    | -1.16 | 0.686 | -1.66 | 0.292 | -1.31 | 0.274 | -1    | 0.993 | -1.28 |
| 1458441_at   | Slc6a17       | solute carrier family 6 (neurotransmitter transporter), member 17                             | -1.17 | 0.648 | -1.98 | 0.164 | -1.16 | 0.712 | -2.28 | 0.06  | -1.65 |
| 1456938_at   | Smadcb1       | SWI/SNF related, matrix associated, actin dependent regulator of chromatin, subunit 1         | -1.28 | 0.568 | -1.03 | 0.912 | -2.09 | 0.197 | -1.4  | 0.554 | -1.45 |
| 1441233_at   | Srp54         | Signal recognition particle 54                                                                | -1.03 | 0.796 | -1.38 | 0.241 | -1.91 | 0.002 | -1.46 | 0.094 | -1.44 |
| 1430728_at   | Krtap5-5      | keratin associated protein 5-5                                                                | -1.12 | 0.765 | -1.12 | 0.838 | -2.29 | 0.061 | -1.61 | 0.263 | -1.54 |
| 1443426_at   | Sltn          | SAFB-like, transcription modulator                                                            | -1.11 | 0.309 | -1.54 | 0.069 | -1.48 | 0.012 | -1.5  | 0.173 | -1.41 |
| 1442525_at   | ---           | Transcribed locus                                                                             | -1.13 | 0.683 | -1.56 | 0.088 | -1.43 | 0.272 | -1.33 | 0.374 | -1.36 |
| 1448081_at   | Colq          | Collagen-like tail subunit (single strand of homotrimer) of asymmetric acetylcholine receptor | -1.16 | 0.368 | -1.94 | 0.184 | -1.18 | 0.659 | -1.67 | 0.183 | -1.49 |
| 1453806_at   | Ndufb2        | NADH dehydrogenase (ubiquinone) 1 beta subcomplex, 2                                          | -1.24 | 0.707 | -1.59 | 0.273 | -1.26 | 0.588 | -1.05 | 0.646 | -1.29 |
| 1450252_at   | Onecut1       | one cut domain, family member 1                                                               | -1.07 | 0.742 | -2.14 | 0.265 | -1.21 | 0.065 | -1.25 | 0.426 | -1.42 |
| 1454493_at   | 5033425B01Rik | RIKEN cDNA 5033425B01 gene                                                                    | -1.22 | 0.345 | -1.31 | 0.534 | -1.54 | 0.479 | -1.45 | 0.394 | -1.38 |
| 1455638_at   | Zfp319        | zinc finger protein 319                                                                       | -1    | 0.999 | -1.76 | 0.476 | -1.52 | 0.046 | -2.4  | 0.027 | -1.67 |
| 1453580_at   | 5630401D24Rik | RIKEN cDNA 5630401D24 gene                                                                    | -1.29 | 0.662 | -1.53 | 0.225 | -1.25 | 0.175 | -1.05 | 0.846 | -1.28 |
| 1444653_at   | ---           | 10 days neonate skin cDNA, RIKEN full-length enriched library, clone:4732412F1                | -1.22 | 0.731 | -1.4  | 0.058 | -1.44 | 0.627 | -2.26 | 0.09  | -1.58 |
| 1447314_at   | Tgfb3         | Transforming growth factor, beta receptor III                                                 | -1.24 | 0.384 | -1.1  | 0.752 | -1.95 | 0.071 | -1.35 | 0.247 | -1.41 |
| 1453237_at   | Qars          | glutamyl-tRNA synthetase                                                                      | -1.18 | 0.653 | -1.83 | 0.052 | -1.21 | 0.53  | -2.33 | 0.006 | -1.64 |
| 1455327_at   | Senp2         | SUMO/sentrin specific peptidase 2                                                             | -1.31 | 0.402 | -1.32 | 0.281 | -1.42 | 0     | -1.02 | 0.929 | -1.27 |
| 1437665_at   | Il22ra2       | Interleukin 22 receptor, alpha 2                                                              | -1.94 | 0.178 | -1.04 | 0.932 | -1.34 | 0.487 | -1.84 | 0.249 | -1.54 |
| 1446079_at   | Zmat2         | zinc finger, matrin type 2                                                                    | -1.14 | 0.335 | -1.71 | 0.158 | -1.32 | 0.091 | -1.22 | 0.323 | -1.35 |

|              |                    |                                                                                |       |       |       |       |       |       |       |       |       |
|--------------|--------------------|--------------------------------------------------------------------------------|-------|-------|-------|-------|-------|-------|-------|-------|-------|
| 1443355_at   | ---                | ---                                                                            | -1.03 | 0.925 | -1.25 | 0.346 | -2.21 | 0.006 | -1.28 | 0.444 | -1.44 |
| 1432781_at   | Pdzd6              | PDZ domain containing 6                                                        | -1.01 | 0.984 | -1.31 | 0.413 | -2.11 | 0.34  | -1.24 | 0.443 | -1.42 |
| 1431569_a_at | Lypd1              | Ly6/Plaur domain containing 1                                                  | -1.25 | 0.61  | -1.35 | 0.651 | -1.46 | 0.584 | -1.33 | 0.71  | -1.35 |
| 1440394_at   | ---                | ---                                                                            | -1.64 | 0.229 | -1.32 | 0.166 | -1.17 | 0.494 | -1.31 | 0.458 | -1.36 |
| 1440467_at   | BC028799 /// 49221 | cDNA sequence BC028799 /// RIKEN cDNA 4922501C03 gene                          | -1.39 | 0.546 | -1.58 | 0.411 | -1.14 | 0.509 | -1.11 | 0.663 | -1.3  |
| 1419095_a_at | Apom               | apolipoprotein M                                                               | -1.15 | 0.455 | -1.21 | 0.096 | -1.9  | 0.356 | -1.25 | 0.448 | -1.38 |
| 1428512_at   | Bhlhb9             | basic helix-loop-helix domain containing, class B9                             | -1.12 | 0.196 | -1.71 | 0.086 | -1.34 | 0.035 | -1.36 | 0.189 | -1.38 |
| 1457908_at   | Zfp407             | Zinc finger protein 407                                                        | -1.02 | 0.956 | -1.4  | 0.18  | -1.89 | 0.043 | -1.32 | 0.147 | -1.41 |
| 1456683_at   | Sltn               | SAFB-like, transcription modulator                                             | -1.33 | 0.093 | -1.24 | 0.14  | -1.48 | 0.001 | -1.43 | 0.22  | -1.37 |
| 1431865_a_at | 4933405K07Rik      | RIKEN cDNA 4933405K07 gene                                                     | -1.07 | 0.829 | -1.42 | 0.211 | -1.7  | 0.408 | -1.89 | 0.199 | -1.52 |
| 1442983_at   | Slc23a2            | Solute carrier family 23 (nucleobase transporters), member 2                   | -1.24 | 0.356 | -1.1  | 0.64  | -1.92 | 0.027 | -1.19 | 0.144 | -1.37 |
| 1450514_at   | Zscan2             | zinc finger and SCAN domain containing 2                                       | -1.13 | 0.16  | -1.38 | 0.656 | -1.62 | 0.44  | -1.25 | 0.715 | -1.34 |
| 1424491_at   | ---                | ---                                                                            | -1.02 | 0.943 | -1.61 | 0.338 | -1.6  | 0.208 | -1.19 | 0.391 | -1.35 |
| 1444621_at   | lqsec2             | IQ motif and Sec7 domain 2                                                     | -1.55 | 0.44  | -1.08 | 0.852 | -1.51 | 0.557 | -1.85 | 0.485 | -1.5  |
| 1437775_at   | Dlst               | dihydrolipoamide S-succinyltransferase (E2 component of 2-oxo-glutarate comple | -1.22 | 0.209 | -1.34 | 0.214 | -1.51 | 0.086 | -1.1  | 0.549 | -1.29 |
| 1441378_at   | ---                | ---                                                                            | -1.1  | 0.163 | -1.49 | 0.179 | -1.54 | 0.2   | -1.22 | 0.649 | -1.34 |
| 1442111_at   | D430033H22Rik      | RIKEN cDNA D430033H22 gene                                                     | -1.06 | 0.527 | -1.37 | 0.004 | -1.79 | 0.032 | -1.24 | 0.335 | -1.36 |
| 1446353_at   | Tubb6              | Tubulin, beta 6                                                                | -1.14 | 0.652 | -1.4  | 0.477 | -1.56 | 0.063 | -1.42 | 0.153 | -1.38 |
| 1432676_at   | ---                | ---                                                                            | -1.29 | 0.394 | -1.84 | 0.073 | -1.1  | 0.648 | -1.71 | 0.018 | -1.48 |
| 1451590_at   | Cplx4              | complexin 4                                                                    | -1.99 | 0.073 | -1.19 | 0.735 | -1.13 | 0.783 | -1.6  | 0.532 | -1.48 |
| 1420275_at   | ---                | ---                                                                            | -2.21 | 0.048 | -1.24 | 0.572 | -1.03 | 0.93  | -1.19 | 0.522 | -1.42 |
| 1419167_at   | Prap1              | proline-rich acidic protein 1                                                  | -1.22 | 0.595 | -1.79 | 0.15  | -1.17 | 0.5   | -1.23 | 0.199 | -1.35 |
| 1435904_at   | Eif2c3             | eukaryotic translation initiation factor 2C, 3                                 | -1.31 | 0.015 | -1.3  | 0.037 | -1.44 | 0.187 | -1.17 | 0.564 | -1.3  |
| 1430068_at   | C030011L09Rik      | RIKEN cDNA C030011L09 gene                                                     | -1.4  | 0.411 | -1.4  | 0.555 | -1.25 | 0.4   | -2.08 | 0.33  | -1.53 |
| 1453083_at   | 6430701C03Rik      | RIKEN cDNA 6430701C03 gene                                                     | -1.48 | 0.071 | -1.24 | 0.292 | -1.33 | 0.175 | -1.17 | 0.34  | -1.31 |
| 1452108_at   | Igf1r              | insulin-like growth factor I receptor                                          | -1.74 | 0.01  | -1.5  | 0.344 | -1.01 | 0.934 | -1.02 | 0.979 | -1.32 |
| 1419363_a_at | Mrpl35             | mitochondrial ribosomal protein L35                                            | -1.3  | 0.024 | -1.43 | 0.013 | -1.3  | 0.039 | -1.07 | 0.712 | -1.28 |
| 1449921_s_at | Cpne6              | copine VI                                                                      | -1.45 | 0.128 | -1.21 | 0.448 | -1.4  | 0.468 | -1.12 | 0.488 | -1.29 |
| 1442181_at   | Grllf1             | Glucocorticoid receptor DNA binding factor 1                                   | -1.17 | 0.505 | -1.21 | 0.242 | -1.79 | 0.059 | -1.52 | 0.013 | -1.43 |
| 1443538_at   | ---                | ---                                                                            | -1.09 | 0.806 | -1.19 | 0.75  | -2.08 | 0.174 | -1.06 | 0.8   | -1.36 |
| 1432897_at   | 4930435N07Rik      | RIKEN cDNA 4930435N07 gene                                                     | -1.05 | 0.716 | -2.32 | 0.047 | -1.17 | 0.407 | -1.79 | 0.37  | -1.58 |
| 1420662_at   | 4933439F18Rik      | RIKEN cDNA 4933439F18 gene                                                     | -1.28 | 0.073 | -1.5  | 0.59  | -1.27 | 0.492 | -1.19 | 0.442 | -1.31 |
| 1418207_at   | Fxyd4              | FXFD domain-containing ion transport regulator 4                               | -1.2  | 0.359 | -1.63 | 0.169 | -1.27 | 0.214 | -1.31 | 0.568 | -1.35 |
| 1432656_at   | 3222402N08Rik      | RIKEN cDNA 3222402N08 gene                                                     | -2.16 | 0.391 | -1.27 | 0.548 | -1.02 | 0.711 | -1.02 | 0.971 | -1.37 |
| 1439283_at   | Osbp19             | Oxysterol binding protein-like 9                                               | -1.34 | 0.351 | -1.05 | 0.579 | -1.86 | 0.038 | -1.57 | 0.153 | -1.46 |
| 1454215_at   | 2410007B07Rik      | RIKEN cDNA 2410007B07 gene                                                     | -1.2  | 0.283 | -1.62 | 0.223 | -1.28 | 0.069 | -1.63 | 0.622 | -1.43 |
| 1442206_at   | Mamdc1             | MAM domain containing 1                                                        | -1.83 | 0.343 | -1.11 | 0.639 | -1.27 | 0.024 | -1.43 | 0.066 | -1.41 |
| 1440353_at   | Ntf5               | neurotrophin 5                                                                 | -1.47 | 0.308 | -1.38 | 0.206 | -1.21 | 0.222 | -1.33 | 0.663 | -1.35 |
| 1431302_a_at | Nudt7              | nudix (nucleoside diphosphate linked moiety X)-type motif 7                    | -1.15 | 0.282 | -1.92 | 0.103 | -1.18 | 0.138 | -1.18 | 0.438 | -1.36 |
| 1456712_at   | Lcorl              | ligand dependent nuclear receptor corepressor-like                             | -1.31 | 0.056 | -1.41 | 0.017 | -1.31 | 0.115 | -1.16 | 0.527 | -1.3  |
| 1459322_at   | Syne2              | Synaptic nuclear envelope 2                                                    | -1.21 | 0.405 | -1.32 | 0.432 | -1.55 | 0.119 | -1.05 | 0.741 | -1.28 |
| 1425662_at   | Cdadcl             | cytidine and dCMP deaminase domain containing 1                                | -1.09 | 0.689 | -1.68 | 0.123 | -1.38 | 0.096 | -1.42 | 0.427 | -1.39 |
| 1433337_at   | 6720460K10Rik      | RIKEN cDNA 6720460K10 gene                                                     | -1.63 | 0.411 | -1.05 | 0.812 | -1.5  | 0.288 | -1.22 | 0.73  | -1.35 |
| 1439163_at   | Zbtb16             | zinc finger and BTB domain containing 16                                       | -1.48 | 0.758 | -1.46 | 0.45  | -1.15 | 0.785 | -1.98 | 0.381 | -1.52 |
| 1440274_at   | Rapgef4            | Rap guanine nucleotide exchange factor (GEF) 4                                 | -1.61 | 0.022 | -1    | 0.989 | -1.62 | 0.1   | -2.88 | 0.13  | -1.78 |
| 1445001_at   | ---                | ---                                                                            | -1.1  | 0.536 | -1.29 | 0.185 | -1.81 | 0.03  | -1.15 | 0.547 | -1.34 |
| 1455789_x_at | LOC621284          | similar to heat shock protein 8                                                | -1.35 | 0.114 | -1.31 | 0.266 | -1.36 | 0.056 | -1.17 | 0.139 | -1.3  |
| 1458226_at   | Flnb               | filamin, beta                                                                  | -1.16 | 0.459 | -2.43 | 0.281 | -1.04 | 0.877 | -1.18 | 0.813 | -1.45 |
| 1446790_at   | C78948             | expressed sequence C78948                                                      | -1.55 | 0.469 | -1.13 | 0.737 | -1.42 | 0.125 | -4.34 | 0.063 | -2.11 |
| 1438273_at   | ---                | ---                                                                            | -1.11 | 0.752 | -1.03 | 0.951 | -2.71 | 0.027 | -1.36 | 0.287 | -1.55 |
| 1425083_at   | Otor               | otoraplin                                                                      | -1.5  | 0.494 | -1.29 | 0.609 | -1.26 | 0.572 | -1.73 | 0.405 | -1.45 |
| 1430196_at   | 8430408J09Rik      | RIKEN cDNA 8430408J09 gene                                                     | -1.37 | 0.118 | -1.14 | 0.626 | -1.59 | 0.061 | -1.75 | 0.096 | -1.46 |
| 1437963_at   | C530045E16Rik      | RIKEN cDNA C530045E16 gene                                                     | -1.35 | 0.497 | -1.98 | 0.255 | -1.01 | 0.973 | -1.67 | 0.146 | -1.5  |

|              |                    |                                                                                            |       |       |       |       |       |       |       |       |       |
|--------------|--------------------|--------------------------------------------------------------------------------------------|-------|-------|-------|-------|-------|-------|-------|-------|-------|
| 1458185_at   | Thap4              | THAP domain containing 4                                                                   | -1.38 | 0.111 | -1.3  | 0.338 | -1.35 | 0.121 | -1.25 | 0.082 | -1.32 |
| 1456121_at   | Lrriq2             | leucine-rich repeats and IQ motif containing 2                                             | -1.49 | 0.276 | -1.12 | 0.785 | -1.49 | 0.068 | -1.31 | 0.371 | -1.35 |
| 1452549_at   | Gm1549             | gene model 1549, (NCBI)                                                                    | -3.51 | 0.039 | -1.05 | 0.939 | -1    | 0.994 | -1.8  | 0.007 | -1.84 |
| 1458186_at   | ---                | Transcribed locus                                                                          | -1.42 | 0.036 | -1.09 | 0.729 | -1.63 | 0.064 | -1.29 | 0.513 | -1.36 |
| 1458977_at   | A530021J07         | hypothetical protein A530021J07                                                            | -1.6  | 0.3   | -1.06 | 0.923 | -1.49 | 0.431 | -2.33 | 0.151 | -1.62 |
| 1426320_at   | 4933437K13Rik      | RIKEN cDNA 4933437K13 gene                                                                 | -1.22 | 0.368 | -1.6  | 0.139 | -1.26 | 0.266 | -2.15 | 0.033 | -1.56 |
| 1420577_at   | Aicda              | activation-induced cytidine deaminase                                                      | -1.97 | 0.099 | -1.02 | 0.946 | -1.33 | 0.422 | -1.69 | 0.331 | -1.5  |
| 1422800_at   | Bat2               | HLA-B associated transcript 2                                                              | -1.74 | 0.255 | -1.5  | 0.37  | -1    | 0.993 | -1.54 | 0.252 | -1.45 |
| 1442485_at   | ---                | ---                                                                                        | -1.71 | 0.183 | -1.13 | 0.616 | -1.31 | 0.519 | -1.26 | 0.523 | -1.35 |
| 1439945_at   | Zfp449             | zinc finger protein 449                                                                    | -1.27 | 0.358 | -1.35 | 0.299 | -1.42 | 0.134 | -1.29 | 0.353 | -1.33 |
| 1451614_a_at | Amelx              | amelogenin X chromosome                                                                    | -1.63 | 0.259 | -1.57 | 0.019 | -1.01 | 0.955 | -1.68 | 0.543 | -1.47 |
| 1449793_at   | ---                | ---                                                                                        | -1.2  | 0.525 | -1.31 | 0.581 | -1.55 | 0.101 | -1.94 | 0.155 | -1.5  |
| 1435559_at   | Myo6               | myosin VI                                                                                  | -1.23 | 0.288 | -1.38 | 0.07  | -1.43 | 0.024 | -1.26 | 0.682 | -1.32 |
| 1460081_at   | Syt7               | Synaptotagmin VII                                                                          | -1.84 | 0.051 | -1.14 | 0.321 | -1.22 | 0.337 | -1.83 | 0.253 | -1.51 |
| 1460103_at   | ---                | ---                                                                                        | -2.11 | 0.116 | -1.11 | 0.685 | -1.15 | 0.742 | -1.22 | 0.512 | -1.4  |
| 1431403_a_at | 2900002G04Rik      | RIKEN cDNA 2900002G04 gene                                                                 | -1.19 | 0.2   | -1.58 | 0.254 | -1.31 | 0.417 | -1.07 | 0.897 | -1.29 |
| 1446138_at   | Kifap3             | Kinesin-associated protein 3                                                               | -1.02 | 0.939 | -1.52 | 0.484 | -1.67 | 0.111 | -1.64 | 0.135 | -1.46 |
| 1438285_at   | 2210015D19Rik      | RIKEN cDNA 2210015D19 gene                                                                 | -1.26 | 0.16  | -1.38 | 0.155 | -1.39 | 0.152 | -1.29 | 0.219 | -1.33 |
| 1458881_at   | 9530001P21Rik      | RIKEN cDNA 9530001P21 gene                                                                 | -2.43 | 0.116 | -1.18 | 0.655 | -1.02 | 0.941 | -1.36 | 0.484 | -1.5  |
| 1438127_at   | LOC552906          | hypothetical LOC552906                                                                     | -1.1  | 0.698 | -1.34 | 0.184 | -1.71 | 0.114 | -1.18 | 0.33  | -1.33 |
| 1427944_at   | C1qdc1             | C1q domain containing 1                                                                    | -1.38 | 0.036 | -1.19 | 0.551 | -1.49 | 0.065 | -1.2  | 0.271 | -1.31 |
| 1441046_at   | ---                | ---                                                                                        | -1.26 | 0.429 | -1.3  | 0.243 | -1.49 | 0.144 | -1.27 | 0.244 | -1.33 |
| 1438457_at   | ---                | Transcribed locus, strongly similar to XP_574375.1 PREDICTED: similar to MGC               | -1.82 | 0.178 | -1.38 | 0.386 | -1.04 | 0.83  | -1.03 | 0.965 | -1.31 |
| 1433800_a_at | Pomc1              | pro-opiomelanocortin-alpha                                                                 | -1.42 | 0.019 | -1.36 | 0.545 | -1.25 | 0.395 | -1.73 | 0.021 | -1.44 |
| 1459481_at   | Pcdh11x            | Protocadherin 11 X-linked                                                                  | -2.1  | 0.028 | -1.12 | 0.871 | -1.14 | 0.762 | -1.79 | 0.345 | -1.54 |
| 1434490_at   | Scarf1             | scavenger receptor class F, member 1                                                       | -1.28 | 0.398 | -1.49 | 0.303 | -1.27 | 0.42  | -1.1  | 0.715 | -1.28 |
| 1459276_at   | A530088E08Rik      | RIKEN cDNA A530088E08 gene                                                                 | -2.44 | 0.441 | -1.04 | 0.943 | -1.15 | 0.767 | -1.38 | 0.395 | -1.5  |
| 1455425_at   | BB001228           | expressed sequence BB001228                                                                | -1.29 | 0.087 | -1.24 | 0.717 | -1.52 | 0.083 | -2.25 | 0.032 | -1.58 |
| 1441779_at   | 9530006C21Rik      | RIKEN cDNA 9530006C21 gene                                                                 | -1.29 | 0.191 | -1.09 | 0.694 | -1.84 | 0.055 | -1.92 | 0.124 | -1.53 |
| 1459398_at   | ---                | ---                                                                                        | -1.26 | 0.449 | -1.45 | 0.502 | -1.32 | 0.273 | -1.97 | 0.192 | -1.5  |
| 1445543_at   | 9830124H08Rik      | RIKEN cDNA 9830124H08 gene                                                                 | -1.09 | 0.268 | -1.44 | 0.16  | -1.6  | 0.027 | -1.31 | 0.442 | -1.36 |
| 1439484_at   | 4930431H11Rik      | RIKEN cDNA 4930431H11 gene                                                                 | -1.1  | 0.745 | -1.91 | 0.101 | -1.24 | 0.197 | -1.62 | 0.22  | -1.46 |
| 1423595_at   | Mina               | myc induced nuclear antigen                                                                | -1.32 | 0.087 | -1.47 | 0.05  | -1.25 | 0.084 | -1.22 | 0.118 | -1.31 |
| 1443086_at   | Alcam              | activated leukocyte cell adhesion molecule                                                 | -1.17 | 0.411 | -1.18 | 0.158 | -1.85 | 0.001 | -1.37 | 0.313 | -1.39 |
| 1433863_at   | Btf3 /// LOC640665 | basic transcription factor 3 /// similar to basic transcription factor 3 /// similar to ba | -1.32 | 0.115 | -1.18 | 0.493 | -1.58 | 0.07  | -1.18 | 0.502 | -1.31 |
| 1440247_at   | Phf14              | PHD finger protein 14                                                                      | -1.58 | 0.196 | -1.09 | 0.757 | -1.46 | 0.35  | -2.15 | 0.033 | -1.57 |
| 1435480_at   | Braf               | Braf transforming gene                                                                     | -1.15 | 0.279 | -1.29 | 0.001 | -1.67 | 0.03  | -1.17 | 0.07  | -1.32 |
| 1443862_at   | ---                | ---                                                                                        | -1.02 | 0.892 | -1.39 | 0.049 | -1.84 | 0.025 | -1.58 | 0.169 | -1.46 |
| 1416602_a_at | Rad52              | RAD52 homolog (S. cerevisiae)                                                              | -1.56 | 0.004 | -1.33 | 0.002 | -1.18 | 0.65  | -1.35 | 0.118 | -1.35 |
| 1432222_at   | A930015G24Rik      | RIKEN cDNA A930015G24 gene                                                                 | -1.4  | 0.066 | -1.11 | 0.864 | -1.6  | 0.205 | -1.14 | 0.78  | -1.31 |
| 1456257_at   | C130065N10Rik      | RIKEN cDNA C130065N10 gene                                                                 | -1.09 | 0.628 | -1.45 | 0.346 | -1.58 | 0.047 | -1.24 | 0.38  | -1.34 |
| 1456321_at   | Npal1              | NIPA-like domain containing 1                                                              | -1.73 | 0.673 | -1.04 | 0.933 | -1.43 | 0.247 | -1.98 | 0.019 | -1.54 |
| 1442749_at   | Braf               | Braf transforming gene                                                                     | -1.01 | 0.958 | -1.49 | 0.281 | -1.71 | 0.032 | -1.49 | 0.333 | -1.43 |
| 1444909_at   | ---                | Transcribed locus                                                                          | -2.56 | 0.187 | -1.15 | 0.522 | -1.02 | 0.94  | -1.18 | 0.785 | -1.48 |
| 1445231_at   | B230112C05Rik      | RIKEN cDNA B230112C05 gene                                                                 | -1.58 | 0.114 | -1.07 | 0.642 | -1.48 | 0.42  | -1.71 | 0.229 | -1.46 |
| 1425223_at   | Birc3              | baculoviral IAP repeat-containing 3                                                        | -1.28 | 0.602 | -1.23 | 0.361 | -1.54 | 0.244 | -2.17 | 0.174 | -1.55 |
| 1444345_at   | ---                | Transcribed locus                                                                          | -1.02 | 0.938 | -1.55 | 0.443 | -1.62 | 0.313 | -2.05 | 0.239 | -1.56 |
| 1440365_at   | Actb               | Actin, beta, cytoplasmic                                                                   | -1.24 | 0.292 | -1.19 | 0.557 | -1.68 | 0.016 | -1.14 | 0.347 | -1.31 |
| 1447983_at   | Zfml               | Zinc finger, matrin-like                                                                   | -1.84 | 0.28  | -1.13 | 0.853 | -1.23 | 0.55  | -1.46 | 0.354 | -1.41 |
| 1460546_at   | Lgi3               | leucine-rich repeat LGI family, member 3                                                   | -1.14 | 0.672 | -1.91 | 0.007 | -1.19 | 0.209 | -2.19 | 0.214 | -1.61 |
| 1447387_at   | ---                | ---                                                                                        | -1.23 | 0.464 | -1.26 | 0.573 | -1.58 | 0.261 | -1.41 | 0.674 | -1.37 |
| 1436093_at   | Epha10             | Eph receptor A10                                                                           | -1.12 | 0.598 | -1.23 | 0.453 | -1.85 | 0.202 | -1.22 | 0.175 | -1.36 |
| 1446504_at   | ---                | ---                                                                                        | -1.01 | 0.933 | -1.49 | 0.043 | -1.71 | 0.056 | -1.3  | 0.268 | -1.38 |

|              |                   |                                                                                      |       |       |       |       |       |       |       |       |       |
|--------------|-------------------|--------------------------------------------------------------------------------------|-------|-------|-------|-------|-------|-------|-------|-------|-------|
| 1451980_at   | Casd1             | CAS1 domain containing 1                                                             | -1.3  | 0.351 | -1.24 | 0.105 | -1.5  | 0.002 | -1.47 | 0.09  | -1.38 |
| 1432813_at   | 2900064F13Rik     | RIKEN cDNA 2900064F13 gene                                                           | -1.33 | 0.621 | -1.64 | 0.402 | -1.13 | 0.574 | -1.38 | 0.275 | -1.37 |
| 1434311_at   | Cnot6l            | CCR4-NOT transcription complex, subunit 6-like                                       | -1.22 | 0.176 | -1.26 | 0.289 | -1.59 | 0.049 | -1.28 | 0.289 | -1.34 |
| 1457398_at   | Gdi2              | Guanosine diphosphate (GDP) dissociation inhibitor 2                                 | -1.18 | 0.071 | -1.3  | 0.13  | -1.59 | 0.008 | -1.81 | 0.12  | -1.47 |
| 1438842_at   | Mtch2             | mitochondrial carrier homolog 2 (C. elegans)                                         | -1.19 | 0.399 | -1.59 | 0.348 | -1.3  | 0.431 | -1.34 | 0.415 | -1.35 |
| 1441100_at   | Mbtd1             | mbt domain containing 1                                                              | -1.15 | 0.195 | -1.38 | 0.04  | -1.54 | 0.049 | -1.75 | 0.054 | -1.45 |
| 1446940_at   | Traf6             | Tnf receptor-associated factor 6                                                     | -2.01 | 0.343 | -1.02 | 0.982 | -1.31 | 0.435 | -1.09 | 0.902 | -1.36 |
| 1452646_at   | Trp53inp2         | tumor protein p53 inducible nuclear protein 2                                        | -1.25 | 0.021 | -1.58 | 0.213 | -1.23 | 0.458 | -1.29 | 0.279 | -1.34 |
| 1429721_s_at | 4930579C15Rik     | RIKEN cDNA 4930579C15 gene                                                           | -1.19 | 0.484 | -1.06 | 0.794 | -2.15 | 0.164 | -1.77 | 0.291 | -1.54 |
| 1439689_at   | 9030224M15Rik     | RIKEN cDNA 9030224M15 gene                                                           | -1.29 | 0.255 | -1.12 | 0.839 | -1.74 | 0.042 | -1.29 | 0.464 | -1.36 |
| 1429820_at   | Rutbc2            | RUN and TBC1 domain containing 2                                                     | -1.05 | 0.935 | -2.27 | 0.008 | -1.18 | 0.781 | -2.5  | 0.097 | -1.75 |
| 1438036_x_at | AW061290          | expressed sequence AW061290                                                          | -1.32 | 0.27  | -1.44 | 0.029 | -1.26 | 0.226 | -1.09 | 0.707 | -1.28 |
| 1432915_at   | 5730407I07Rik     | RIKEN cDNA 5730407I07 gene                                                           | -1.31 | 0.742 | -1.25 | 0.591 | -1.47 | 0.4   | -1.89 | 0.317 | -1.48 |
| 1434467_at   | Atcay             | ataxia, cerebellar, Cayman type homolog (human)                                      | -1.16 | 0.563 | -1.71 | 0.17  | -1.26 | 0.619 | -1.52 | 0.468 | -1.41 |
| 1440698_at   | Unc5c             | Unc-5 homolog C (C. elegans)                                                         | -1.27 | 0.109 | -1.35 | 0.621 | -1.39 | 0.309 | -1.01 | 0.988 | -1.25 |
| 1444647_at   | Plaa              | phospholipase A2, activating protein                                                 | -1.05 | 0.248 | -1.34 | 0.327 | -1.83 | 0.046 | -1.18 | 0.296 | -1.35 |
| 1441925_at   | Slc15a4           | solute carrier family 15, member 4                                                   | -1.77 | 0.518 | -1.25 | 0.091 | -1.13 | 0.631 | -2.13 | 0.401 | -1.57 |
| 1445589_at   | Slc23a2           | Solute carrier family 23 (nucleobase transporters), member 2                         | -1.01 | 0.979 | -1.23 | 0.221 | -2.29 | 0.002 | -1.44 | 0.152 | -1.49 |
| 1440653_at   | Phip              | Pleckstrin homology domain interacting protein                                       | -1    | 0.992 | -2.61 | 0.064 | -1.15 | 0.707 | -1.17 | 0.317 | -1.49 |
| 1445733_at   | 2610206G21Rik     | RIKEN cDNA 2610206G21 gene                                                           | -1.29 | 0.115 | -1.1  | 0.82  | -1.77 | 0.269 | -1.22 | 0.697 | -1.35 |
| 1457775_at   | Sacs              | sacsin                                                                               | -2.05 | 0.168 | -1.03 | 0.954 | -1.28 | 0.56  | -1.7  | 0.473 | -1.51 |
| 1447948_at   | A430107O13Rik     | RIKEN cDNA A430107O13 gene                                                           | -1.19 | 0.192 | -1.36 | 0.097 | -1.48 | 0.217 | -1.22 | 0.142 | -1.31 |
| 1437431_at   | ---               | ---                                                                                  | -1.44 | 0.328 | -1.03 | 0.903 | -1.73 | 0.096 | -1.51 | 0.181 | -1.43 |
| 1458790_at   | ---               | ---                                                                                  | -1.45 | 0.484 | -1.22 | 0.691 | -1.35 | 0.642 | -2.33 | 0.36  | -1.59 |
| 1442535_at   | Zfp609            | Zinc finger protein 609                                                              | -1.18 | 0.04  | -1.18 | 0.52  | -1.8  | 0.008 | -1.26 | 0.443 | -1.36 |
| 1440223_at   | Rbm6              | RNA binding motif protein 6                                                          | -1.07 | 0.499 | -1.29 | 0.001 | -1.85 | 0.006 | -1.34 | 0.085 | -1.39 |
| 1418559_at   | Tesp1             | testicular serine protease 1                                                         | -1.3  | 0.728 | -1.61 | 0.445 | -1.17 | 0.756 | -1.31 | 0.701 | -1.35 |
| 1440649_at   | Tes               | Testis derived transcript                                                            | -1.21 | 0.492 | -1.83 | 0.202 | -1.14 | 0.765 | -1.75 | 0.081 | -1.48 |
| 1456771_at   | Zyg11bl           | zyg-11 homolog B (C. elegans)-like                                                   | -1.13 | 0.322 | -2.2  | 0.026 | -1.1  | 0.656 | -1.73 | 0.261 | -1.54 |
| 1456453_at   | Evl               | Ena-vasodilator stimulated phosphoprotein                                            | -2.03 | 0.166 | -1.13 | 0.504 | -1.15 | 0.456 | -2.58 | 0.03  | -1.72 |
| 1444496_at   | 2600011C06Rik     | RIKEN cDNA 2600011C06 gene                                                           | -1.48 | 0.117 | -1.52 | 0.16  | -1.09 | 0.754 | -1.69 | 0.197 | -1.45 |
| 1425292_at   | Dtna              | dystrobrevin alpha                                                                   | -1.17 | 0.048 | -1.21 | 0.643 | -1.75 | 0.043 | -1.47 | 0.6   | -1.4  |
| 1437073_x_at | AV025504          | expressed sequence AV025504                                                          | -1.02 | 0.707 | -2.78 | 0.004 | -1.1  | 0.43  | -1.08 | 0.367 | -1.49 |
| 1447016_at   | Tbc1d1            | TBC1 domain family, member 1                                                         | -1.48 | 0.073 | -1.51 | 0.289 | -1.1  | 0.745 | -2.69 | 0.076 | -1.69 |
| 1460119_at   | ---               | 16 days embryo lung cDNA, RIKEN full-length enriched library, clone:8430415C1        | -1.12 | 0.547 | -1.26 | 0.357 | -1.78 | 0.079 | -1.3  | 0.111 | -1.36 |
| 1449068_at   | Zfp148            | zinc finger protein 148                                                              | -1.16 | 0.212 | -1.32 | 0.022 | -1.59 | 0.054 | -1.36 | 0.114 | -1.36 |
| 1417757_at   | Unc13b            | unc-13 homolog B (C. elegans)                                                        | -1.63 | 0.285 | -1.04 | 0.91  | -1.49 | 0.132 | -1.16 | 0.711 | -1.33 |
| 1424272_at   | Stat3             | signal transducer and activator of transcription 3                                   | -1.57 | 0.302 | -1.52 | 0.36  | -1.05 | 0.757 | -1.32 | 0.54  | -1.36 |
| 1449542_at   | Pbx1              | pre B-cell leukemia transcription factor 1                                           | -1.13 | 0.589 | -1.4  | 0.315 | -1.53 | 0.083 | -1.99 | 0.015 | -1.52 |
| 1440931_at   | Scrt2             | scratch homolog 2, zinc finger protein (Drosophila)                                  | -1.48 | 0.595 | -1.06 | 0.632 | -1.58 | 0.467 | -1.09 | 0.708 | -1.3  |
| 1441490_at   | Tmem39a           | transmembrane protein 39a                                                            | -1.93 | 0.008 | -1.05 | 0.736 | -1.28 | 0.109 | -1.26 | 0.317 | -1.38 |
| 1454229_a_at | Exod1             | exonuclease domain containing 1                                                      | -1.52 | 0.117 | -1.21 | 0.66  | -1.31 | 0.578 | -1.06 | 0.922 | -1.28 |
| 1439958_at   | LOC546257 /// LOC | similar to transcription elongation factor B polypeptide 3 binding protein 1 isoform | -1.69 | 0.464 | -1.08 | 0.828 | -1.37 | 0.285 | -1.26 | 0.609 | -1.35 |
| 1443169_at   | Cnot4             | CCR4-NOT transcription complex, subunit 4                                            | -1.81 | 0.121 | -1.41 | 0.587 | -1.01 | 0.977 | -1.22 | 0.289 | -1.36 |
| 1429131_at   | Ube2v2            | ubiquitin-conjugating enzyme E2 variant 2                                            | -1.45 | 0.089 | -1.13 | 0.517 | -1.49 | 0.112 | -1.1  | 0.253 | -1.29 |
| 1448700_at   | G0s2              | G0/G1 switch gene 2                                                                  | -1.18 | 0.462 | -1.33 | 0.56  | -1.53 | 0.244 | -1.46 | 0.016 | -1.38 |
| 1449125_at   | Tnfaip8l1         | tumor necrosis factor, alpha-induced protein 8-like 1                                | -1.71 | 0.394 | -1.44 | 0.091 | -1.03 | 0.81  | -1.3  | 0.089 | -1.37 |
| 1442750_at   | ---               | Transcribed locus                                                                    | -1.29 | 0.673 | -1.02 | 0.923 | -2    | 0.068 | -1.03 | 0.905 | -1.34 |
| 1442392_at   | ---               | 0 day neonate thymus cDNA, RIKEN full-length enriched library, clone:A430024N        | -1.32 | 0.216 | -1.64 | 0.523 | -1.13 | 0.699 | -1.08 | 0.6   | -1.29 |
| 1459906_at   | Dgkh              | Diacylglycerol kinase, eta                                                           | -1.3  | 0.422 | -1.52 | 0.119 | -1.21 | 0.248 | -1.42 | 0     | -1.36 |
| 1456656_at   | Lin7a             | lin-7 homolog A (C. elegans)                                                         | -1.35 | 0.517 | -1.4  | 0.112 | -1.25 | 0.591 | -1.05 | 0.924 | -1.26 |
| 1460128_at   | Tmed2             | Transmembrane emp24 domain trafficking protein 2                                     | -1.74 | 0.165 | -1.04 | 0.938 | -1.4  | 0.15  | -1.39 | 0.645 | -1.39 |
| 1441964_at   | 1110003F05Rik     | RIKEN cDNA 1110003F05 gene                                                           | -1.24 | 0.265 | -1.29 | 0.116 | -1.5  | 0.103 | -1.17 | 0.771 | -1.3  |

|              |                   |                                                                                   |       |       |       |       |       |       |       |       |       |
|--------------|-------------------|-----------------------------------------------------------------------------------|-------|-------|-------|-------|-------|-------|-------|-------|-------|
| 1441002_at   | Pop1              | processing of precursor 1, ribonuclease P/MRP family, (S. cerevisiae)             | -1.48 | 0.423 | -1.04 | 0.926 | -1.62 | 0.101 | -1.61 | 0.068 | -1.44 |
| 1442907_at   | ---               | Adult male aorta and vein cDNA, RIKEN full-length enriched library, clone:A5300i  | -1.4  | 0.429 | -1.73 | 0.112 | -1.04 | 0.871 | -1.09 | 0.696 | -1.32 |
| 1422148_at   | Matn3             | matrilin 3                                                                        | -1.81 | 0.532 | -1.02 | 0.974 | -1.39 | 0.398 | -1.77 | 0.389 | -1.5  |
| 1428940_at   | Gnaq              | guanine nucleotide binding protein, alpha q polypeptide                           | -1.29 | 0.022 | -1.51 | 0.142 | -1.23 | 0.078 | -1.08 | 0.821 | -1.28 |
| 1447719_at   | ApoH              | Apolipoprotein H                                                                  | -2.01 | 0.185 | -1.14 | 0.486 | -1.14 | 0.733 | -1.33 | 0.471 | -1.4  |
| 1454839_a_at | Ccdc84            | coiled-coil domain containing 84                                                  | -1.31 | 0.287 | -1.41 | 0.029 | -1.29 | 0.02  | -1.44 | 0.087 | -1.36 |
| 1444902_at   | Fbxl10            | F-box and leucine-rich repeat protein 10                                          | -1.36 | 0.037 | -1.23 | 0.243 | -1.42 | 0.179 | -1.25 | 0.245 | -1.32 |
| 1421652_at   | Htr3b             | 5-hydroxytryptamine (serotonin) receptor 3B                                       | -1.65 | 0.334 | -1.21 | 0.799 | -1.22 | 0.708 | -2.5  | 0.164 | -1.65 |
| 1438034_at   | 2410005O16Rik     | RIKEN cDNA 2410005O16 gene                                                        | -1.29 | 0.316 | -1.23 | 0.028 | -1.52 | 0.13  | -1.19 | 0.351 | -1.31 |
| 1431024_a_at | Arid4b            | AT rich interactive domain 4B (Rbp1 like)                                         | -1.41 | 0.298 | -1.36 | 0.109 | -1.24 | 0.345 | -1.18 | 0.543 | -1.3  |
| 1431660_at   | 4930564D02Rik     | RIKEN cDNA 4930564D02 gene                                                        | -1.08 | 0.819 | -1.41 | 0.278 | -1.62 | 0.483 | -1.57 | 0.333 | -1.42 |
| 1430397_at   | Got2 /// LOC64084 | glutamate oxaloacetate transaminase 2, mitochondrial /// similar to Aspartate ami | -1.03 | 0.741 | -1.93 | 0.166 | -1.31 | 0.456 | -1.52 | 0.166 | -1.45 |
| 1437037_x_at | AL033314          | expressed sequence AL033314                                                       | -1.46 | 0.341 | -1.37 | 0.406 | -1.19 | 0.711 | -1.51 | 0.163 | -1.38 |
| 1418863_at   | Gata4             | GATA binding protein 4                                                            | -1.51 | 0.304 | -1.27 | 0.361 | -1.25 | 0.662 | -4.28 | 0     | -2.08 |
| 1454367_at   | 4930413G21Rik     | RIKEN cDNA 4930413G21 gene                                                        | -1.09 | 0.868 | -1.46 | 0.202 | -1.53 | 0.191 | -1.1  | 0.678 | -1.3  |
| 1422419_s_at | Tnp2              | transition protein 2                                                              | -1.38 | 0.004 | -1.12 | 0.825 | -1.58 | 0.141 | -1.23 | 0.165 | -1.33 |
| 1458507_at   | 2810055G22Rik     | RIKEN cDNA 2810055G22 gene                                                        | -1.94 | 0.315 | -1.06 | 0.91  | -1.25 | 0.275 | -1.34 | 0.425 | -1.4  |
| 1449995_at   | 4933421I07Rik     | RIKEN cDNA 4933421I07 gene                                                        | -1.36 | 0.162 | -1.5  | 0.273 | -1.17 | 0.723 | -1.47 | 0.547 | -1.38 |
| 1430014_at   | 5430419D17Rik     | RIKEN cDNA 5430419D17 gene                                                        | -1.5  | 0.506 | -1.12 | 0.715 | -1.44 | 0.216 | -1.63 | 0.236 | -1.42 |
| 1455687_at   | Ick               | intestinal cell kinase                                                            | -1.22 | 0.591 | -1.42 | 0.175 | -1.36 | 0.213 | -1.4  | 0.448 | -1.35 |
| 1454984_at   | AW061234          | expressed sequence AW061234                                                       | -1.12 | 0.656 | -1.63 | 0.093 | -1.34 | 0.163 | -1.49 | 0.126 | -1.4  |
| 1442497_at   | Smchd1            | SMC hinge domain containing 1                                                     | -1.32 | 0.562 | -1.84 | 0.043 | -1.05 | 0.853 | -1.21 | 0.306 | -1.35 |
| 1454233_at   | 2310006M14Rik     | RIKEN cDNA 2310006M14 gene                                                        | -1.45 | 0.381 | -1.39 | 0.273 | -1.18 | 0.548 | -2.69 | 0.06  | -1.68 |
| 1433212_at   | 2700008E08Rik     | RIKEN cDNA 2700008E08 gene                                                        | -1.17 | 0.738 | -1.47 | 0.217 | -1.39 | 0.152 | -1.12 | 0.74  | -1.29 |
| 1438035_at   | AW061290          | expressed sequence AW061290                                                       | -1.32 | 0.237 | -1.43 | 0.019 | -1.26 | 0.289 | -1.18 | 0.235 | -1.3  |
| 1440028_at   | Atg7              | Autophagy-related 7 (yeast)                                                       | -1.19 | 0.294 | -1.16 | 0.669 | -1.83 | 0.135 | -1.77 | 0.08  | -1.48 |
| 1442079_at   | Tmem23            | transmembrane protein 23                                                          | -1.12 | 0.037 | -1.22 | 0.616 | -1.83 | 0.024 | -1.24 | 0.517 | -1.35 |
| 1423934_at   | ---               | ---                                                                               | -1.39 | 0.163 | -1.38 | 0.422 | -1.23 | 0.518 | -1.92 | 0.22  | -1.48 |
| 1443286_at   | AU019754          | expressed sequence AU019754                                                       | -1.24 | 0.564 | -1.23 | 0.648 | -1.57 | 0.163 | -1.06 | 0.893 | -1.28 |
| 1459680_at   | Tomm40            | Translocase of outer mitochondrial membrane 40 homolog (yeast)                    | -1.2  | 0.326 | -1.57 | 0.228 | -1.27 | 0.586 | -1.1  | 0.619 | -1.28 |
| 1417319_at   | Pvrl3             | poliovirus receptor-related 3                                                     | -1.22 | 0.056 | -1.07 | 0.582 | -1.98 | 0.009 | -1.55 | 0.172 | -1.46 |
| 1427714_at   | Smyd1             | SET and MYND domain containing 1                                                  | -1.56 | 0.542 | -1.17 | 0.31  | -1.32 | 0.588 | -1.11 | 0.725 | -1.29 |
| 1429811_at   | 4933424B01Rik     | RIKEN cDNA 4933424B01 gene                                                        | -1.48 | 0.178 | -1.42 | 0.114 | -1.14 | 0.665 | -1.37 | 0.099 | -1.35 |
| 1455878_at   | 2700023E23Rik     | RIKEN cDNA 2700023E23 gene                                                        | -1.27 | 0.164 | -1.44 | 0.141 | -1.29 | 0.191 | -1.24 | 0.528 | -1.31 |
| 1453390_at   | 4930428F12Rik     | RIKEN cDNA 4930428F12 gene                                                        | -1.22 | 0.542 | -1.49 | 0.225 | -1.3  | 0.386 | -2.34 | 0.301 | -1.59 |
| 1431911_at   | 4931423N10Rik     | RIKEN cDNA 4931423N10 gene                                                        | -1.27 | 0.479 | -1.61 | 0.561 | -1.18 | 0.334 | -1    | 0.997 | -1.27 |
| 1430075_at   | Sf3b3             | splicing factor 3b, subunit 3                                                     | -1.25 | 0.254 | -1.16 | 0.563 | -1.67 | 0.022 | -1.38 | 0.2   | -1.37 |
| 1450523_at   | Cntn2             | contactin 2                                                                       | -1.39 | 0.412 | -1.26 | 0.202 | -1.35 | 0.255 | -1.45 | 0.718 | -1.36 |
| 1458643_at   | Dtx1              | deltex 1 homolog (Drosophila)                                                     | -1.92 | 0.424 | -1.33 | 0.513 | -1.02 | 0.847 | -1.25 | 0.698 | -1.38 |
| 1457896_at   | Esrrg             | estrogen-related receptor gamma                                                   | -1.31 | 0.058 | -1.57 | 0.333 | -1.17 | 0.208 | -1.99 | 0.196 | -1.51 |
| 1458464_at   | Hecw2             | HECT, C2 and WW domain containing E3 ubiquitin protein ligase 2                   | -1.07 | 0.91  | -1.23 | 0.538 | -1.95 | 0.073 | -1.84 | 0.082 | -1.52 |
| 1418721_at   | Cops7b            | COP9 (constitutive photomorphogenic) homolog, subunit 7b (Arabidopsis thaliana)   | -1.09 | 0.476 | -1.49 | 0.036 | -1.5  | 0.01  | -1.3  | 0.04  | -1.34 |
| 1452602_a_at | 1700001C19Rik     | RIKEN cDNA 1700001C19 gene                                                        | -2.1  | 0.248 | -1.01 | 0.964 | -1.26 | 0.517 | -1.24 | 0.691 | -1.4  |
| 1439192_at   | Nova2             | neuro-oncological ventral antigen 2                                               | -1.44 | 0.247 | -1.22 | 0.178 | -1.34 | 0.391 | -1.23 | 0.338 | -1.31 |
| 1458632_at   | Dpysl2            | Dihydropyrimidinase-like 2                                                        | -1.55 | 0.335 | -1.2  | 0.776 | -1.28 | 0.328 | -1.38 | 0.029 | -1.35 |
| 1423633_at   | 6530403A03Rik     | RIKEN cDNA 6530403A03 gene                                                        | -1.01 | 0.975 | -1.48 | 0.101 | -1.67 | 0.152 | -1.2  | 0.08  | -1.34 |
| 1459821_x_at | A630082K20Rik     | RIKEN cDNA A630082K20 gene                                                        | -1.31 | 0.257 | -1.58 | 0.605 | -1.16 | 0.643 | -1.63 | 0.496 | -1.42 |
| 1458144_at   | BC031353          | CDNA sequence BC031353                                                            | -1    | 0.997 | -1.81 | 0.105 | -1.42 | 0.341 | -1.31 | 0.57  | -1.38 |
| 1459923_at   | Bex6              | brain expressed gene 6                                                            | -1    | 0.998 | -1.7  | 0.077 | -1.49 | 0.316 | -2.24 | 0.021 | -1.61 |
| 1459743_at   | ---               | Transcribed locus                                                                 | -1.68 | 0.342 | -1.11 | 0.607 | -1.31 | 0.343 | -1.41 | 0.475 | -1.38 |
| 1451375_at   | Ehf               | ets homologous factor                                                             | -1.27 | 0.38  | -1.36 | 0.55  | -1.36 | 0.037 | -1.48 | 0.22  | -1.37 |
| 1456955_at   | ---               | ---                                                                               | -1.21 | 0.383 | -1.43 | 0.026 | -1.36 | 0.227 | -1.25 | 0.553 | -1.31 |
| 1432752_at   | 4930403O18Rik     | RIKEN cDNA 4930403O18 gene                                                        | -1.63 | 0.429 | -1.27 | 0.711 | -1.17 | 0.844 | -1.02 | 0.976 | -1.27 |

|              |                      |                                                                                      |       |       |       |       |       |       |       |       |       |
|--------------|----------------------|--------------------------------------------------------------------------------------|-------|-------|-------|-------|-------|-------|-------|-------|-------|
| 1438828_at   | Rapgef6              | Rap guanine nucleotide exchange factor (GEF) 6                                       | -1.23 | 0.39  | -1.5  | 0.314 | -1.28 | 0.121 | -2.05 | 0.053 | -1.51 |
| 1441880_x_at | MGC30332             | hypothetical protein MGC30332                                                        | -1.3  | 0.42  | -1.24 | 0.288 | -1.46 | 0.069 | -1.65 | 0.104 | -1.41 |
| 1420974_at   | Setdb1               | SET domain, bifurcated 1                                                             | -1.2  | 0.5   | -1.36 | 0.087 | -1.45 | 0.096 | -1.05 | 0.84  | -1.26 |
| 1432852_at   | Phactr1              | phosphatase and actin regulator 1                                                    | -1.28 | 0.621 | -1.22 | 0.189 | -1.51 | 0.162 | -3.66 | 0.13  | -1.92 |
| 1456868_at   | 2900073G15Rik        | RIKEN cDNA 2900073G15 gene                                                           | -1.13 | 0.613 | -1.13 | 0.792 | -2.04 | 0.028 | -1.28 | 0.333 | -1.4  |
| 1420220_x_at | 4930461P20Rik        | RIKEN cDNA 4930461P20 gene                                                           | -1.28 | 0.531 | -1.19 | 0.681 | -1.56 | 0.162 | -1.1  | 0.877 | -1.28 |
| 1420147_at   | AA407331             | expressed sequence AA407331                                                          | -2.18 | 0.42  | -1.12 | 0.805 | -1.1  | 0.851 | -1.79 | 0.386 | -1.55 |
| 1432465_at   | 4933414I06Rik        | RIKEN cDNA 4933414I06 gene                                                           | -1.86 | 0.066 | -1.22 | 0.396 | -1.1  | 0.566 | -1.09 | 0.737 | -1.32 |
| 1450083_at   | Cnot4                | CCR4-NOT transcription complex, subunit 4                                            | -1.18 | 0.396 | -1.39 | 0.214 | -1.45 | 0.312 | -1.02 | 0.939 | -1.26 |
| 1455751_at   | Cand1                | cullin associated and neddylation disassociated 1                                    | -1.28 | 0.736 | -1.84 | 0.298 | -1.07 | 0.662 | -1.08 | 0.78  | -1.32 |
| 1457388_at   | A830080L01Rik        | RIKEN cDNA A830080L01 gene                                                           | -1.15 | 0.829 | -2.26 | 0.252 | -1.05 | 0.914 | -1.19 | 0.656 | -1.41 |
| 1459009_at   | Utrn                 | Utrophin                                                                             | -1.13 | 0.611 | -1.09 | 0.76  | -2.18 | 0.027 | -1.88 | 0.118 | -1.57 |
| 1437440_at   | ---                  | Transcribed locus                                                                    | -1.3  | 0.691 | -1.2  | 0.738 | -1.52 | 0.357 | -1.11 | 0.589 | -1.28 |
| 1430114_at   | 5430420C16Rik        | RIKEN cDNA 5430420C16 gene                                                           | -1.04 | 0.952 | -1.6  | 0.563 | -1.47 | 0.493 | -1.54 | 0.355 | -1.41 |
| 1428923_at   | Ppp1r3g              | protein phosphatase 1, regulatory (inhibitor) subunit 3G                             | -1.5  | 0.494 | -1.14 | 0.847 | -1.39 | 0.183 | -1.57 | 0.196 | -1.4  |
| 1420724_at   | 1700067P10Rik        | RIKEN cDNA 1700067P10 gene                                                           | -1.19 | 0.688 | -1.18 | 0.434 | -1.73 | 0.482 | -2.78 | 0.212 | -1.72 |
| 1424464_s_at | 2210010L05Rik        | RIKEN cDNA 2210010L05 gene                                                           | -1.27 | 0.243 | -1.1  | 0.777 | -1.76 | 0.058 | -1.11 | 0.687 | -1.31 |
| 1438721_a_at | Irf3                 | interferon regulatory factor 3                                                       | -1.59 | 0.24  | -1.14 | 0.723 | -1.32 | 0.044 | -1.55 | 0.281 | -1.4  |
| 1442456_at   | Spata5               | spermatogenesis associated 5                                                         | -1.56 | 0.022 | -1.12 | 0.69  | -1.37 | 0.424 | -1.42 | 0.564 | -1.37 |
| 1442151_at   | D230040A04Rik        | RIKEN cDNA D230040A04 gene                                                           | -1.04 | 0.643 | -1.17 | 0.358 | -2.27 | 0.026 | -1.42 | 0.034 | -1.47 |
| 1438197_at   | Vezt                 | vezatin, adherens junctions transmembrane protein                                    | -1.24 | 0.215 | -1.23 | 0.032 | -1.55 | 0.013 | -1.02 | 0.936 | -1.26 |
| 1429114_at   | Sestd1               | SEC14 and spectrin domains 1                                                         | -1.26 | 0.098 | -1.34 | 0.312 | -1.38 | 0.135 | -1.36 | 0.122 | -1.34 |
| 1425817_a_at | Slc8a1               | solute carrier family 8 (sodium/calcium exchanger), member 1                         | -1.33 | 0.208 | -1.34 | 0.269 | -1.31 | 0.109 | -1.12 | 0.812 | -1.27 |
| 1427549_s_at | Krtap16-10 /// Krtap | keratin associated protein 16-10 /// keratin associated protein 16-3 /// keratin ass | -1.33 | 0.488 | -1.48 | 0.354 | -1.2  | 0.706 | -1.5  | 0.668 | -1.38 |
| 1445975_at   | ---                  | ---                                                                                  | -1.17 | 0.186 | -1.39 | 0.163 | -1.45 | 0.074 | -1.2  | 0.239 | -1.3  |
| 1447344_at   | ---                  | Transcribed locus                                                                    | -1.02 | 0.646 | -1.59 | 0.036 | -1.53 | 0.034 | -1.13 | 0.499 | -1.32 |
| 1456821_at   | 4932439K10Rik        | RIKEN cDNA 4932439K10 gene                                                           | -1.27 | 0.619 | -1.33 | 0.351 | -1.38 | 0.163 | -1.6  | 0.099 | -1.4  |
| 1444248_at   | Rcn2                 | reticulocalbin 2                                                                     | -1.23 | 0.468 | -1.33 | 0.511 | -1.43 | 0.263 | -1.76 | 0.237 | -1.44 |
| 1459862_at   | ---                  | Transcribed locus                                                                    | -1.18 | 0.604 | -1.15 | 0.789 | -1.82 | 0.012 | -1.06 | 0.897 | -1.3  |
| 1430195_at   | 2810043O03Rik        | RIKEN cDNA 2810043O03 gene                                                           | -1.16 | 0.466 | -1.28 | 0.152 | -1.61 | 0.011 | -1.45 | 0.295 | -1.37 |
| 1446584_at   | Txndc4               | Thioredoxin domain containing 4 (endoplasmic reticulum)                              | -1.25 | 0.25  | -1.25 | 0.658 | -1.51 | 0.465 | -2.1  | 0.12  | -1.53 |
| 1424860_at   | D930016D06Rik        | RIKEN cDNA D930016D06 gene                                                           | -1.33 | 0.273 | -1.15 | 0.279 | -1.55 | 0.004 | -1.13 | 0.634 | -1.29 |
| 1459408_at   | Sec22a               | SEC22 vesicle trafficking protein-like A (S. cerevisiae)                             | -2.4  | 0.215 | -1.1  | 0.771 | -1.06 | 0.946 | -1.11 | 0.788 | -1.42 |
| 1445259_at   | Scn2a1               | sodium channel, voltage-gated, type II, alpha 1                                      | -1.4  | 0.582 | -1.18 | 0.698 | -1.41 | 0.297 | -1.47 | 0.374 | -1.37 |
| 1430737_at   | 2810409K11Rik        | RIKEN cDNA 2810409K11 gene                                                           | -1.12 | 0.861 | -1.2  | 0.797 | -1.83 | 0.053 | -1.86 | 0.324 | -1.5  |
| 1444079_at   | Defb8                | defensin beta 8                                                                      | -1.59 | 0.371 | -1.33 | 0.259 | -1.13 | 0.677 | -1.86 | 0.011 | -1.48 |
| 1453356_at   | 5730453I16Rik        | RIKEN cDNA 5730453I16 gene                                                           | -1.01 | 0.967 | -1.29 | 0.435 | -1.99 | 0.069 | -1.64 | 0.213 | -1.48 |
| 1425903_at   | Sema6a               | sema domain, transmembrane domain (TM), and cytoplasmic domain, (semapho             | -1.07 | 0.904 | -1.55 | 0.573 | -1.45 | 0.361 | -1.22 | 0.676 | -1.32 |
| 1436925_at   | Ches1                | checkpoint suppressor 1                                                              | -1.38 | 0.071 | -1.25 | 0.002 | -1.34 | 0.223 | -1.6  | 0.117 | -1.39 |
| 1455166_at   | AW146430             | expressed sequence AW146430                                                          | -1.18 | 0.156 | -1.27 | 0.036 | -1.58 | 0.009 | -1.38 | 0.019 | -1.35 |
| 1428010_at   | Timm9                | translocase of inner mitochondrial membrane 9 homolog (yeast)                        | -1.11 | 0.489 | -1.51 | 0.142 | -1.41 | 0.238 | -1.59 | 0.023 | -1.41 |
| 1435466_at   | A830091I15Rik        | RIKEN cDNA A830091I15 gene                                                           | -1.39 | 0.071 | -1.63 | 0.457 | -1.07 | 0.89  | -1.63 | 0.347 | -1.43 |
| 1443192_at   | ---                  | ---                                                                                  | -2.14 | 0.098 | -1.12 | 0.794 | -1.1  | 0.506 | -2.37 | 0.054 | -1.68 |
| 1420606_at   | Npff                 | neuropeptide FF-amide peptide precursor                                              | -1.48 | 0.529 | -1.03 | 0.954 | -1.61 | 0.093 | -1.39 | 0.292 | -1.38 |
| 1440961_at   | 9130604C24Rik        | RIKEN cDNA 9130604C24 gene                                                           | -1.58 | 0.373 | -1.55 | 0.276 | -1.01 | 0.973 | -1.43 | 0.095 | -1.39 |
| 1458660_at   | AI414330             | expressed sequence AI414330                                                          | -1.28 | 0.559 | -1.75 | 0.207 | -1.09 | 0.725 | -1.12 | 0.723 | -1.31 |
| 1439846_at   | Klf12                | Kruppel-like factor 12                                                               | -1.22 | 0.43  | -1.35 | 0.281 | -1.41 | 0.216 | -1.16 | 0.614 | -1.29 |
| 1443891_at   | Rad51I3              | RAD51-like 3 (S. cerevisiae)                                                         | -1.18 | 0.654 | -1.54 | 0.078 | -1.29 | 0.489 | -1.21 | 0.406 | -1.3  |
| 1425355_at   | BC018371 /// LOC4    | cDNA sequence BC018371 /// hypothetical LOC433604                                    | -1.33 | 0.553 | -1.22 | 0.498 | -1.43 | 0.414 | -1.12 | 0.86  | -1.28 |
| 1441185_at   | Msi2                 | Musashi homolog 2 (Drosophila)                                                       | -1.25 | 0.181 | -1.08 | 0.84  | -1.83 | 0.075 | -1.43 | 0.111 | -1.4  |
| 1456991_at   | Cobl1                | Cobl-like 1                                                                          | -1.14 | 0.603 | -1.18 | 0.218 | -1.83 | 0.009 | -1.97 | 0.119 | -1.53 |
| 1439887_at   | ---                  | 16 days embryo head cDNA, RIKEN full-length enriched library, clone:C130025B         | -1.41 | 0.1   | -1.22 | 0.521 | -1.35 | 0.36  | -1.03 | 0.932 | -1.25 |
| 1432880_at   | 6820402A03Rik        | RIKEN cDNA 6820402A03 gene                                                           | -1.09 | 0.678 | -1.65 | 0.007 | -1.34 | 0.228 | -2.45 | 0.002 | -1.63 |

|              |               |                                                                                |       |       |       |       |       |       |       |       |       |
|--------------|---------------|--------------------------------------------------------------------------------|-------|-------|-------|-------|-------|-------|-------|-------|-------|
| 1429057_at   | Narg1l        | NMDA receptor regulated 1-like                                                 | -1.2  | 0.347 | -1.3  | 0.046 | -1.5  | 0.057 | -1.01 | 0.984 | -1.25 |
| 1435194_at   | ---           | ---                                                                            | -1.41 | 0.119 | -1.34 | 0.543 | -1.23 | 0.509 | -1.03 | 0.879 | -1.25 |
| 1448096_at   | Ogfod1        | 2-oxoglutarate and iron-dependent oxygenase domain containing 1                | -1.39 | 0.045 | -1.21 | 0.124 | -1.38 | 0.162 | -1.34 | 0.167 | -1.33 |
| 1444742_at   | Asb14         | Ankyrin repeat and SOCS box-containing protein 14                              | -1.67 | 0.328 | -1.1  | 0.872 | -1.31 | 0.53  | -1.98 | 0.19  | -1.51 |
| 1447408_at   | Nipbl         | Nipped-B homolog (Drosophila)                                                  | -1.1  | 0.313 | -1.37 | 0.001 | -1.57 | 0.035 | -1.41 | 0.045 | -1.36 |
| 1430555_s_at | Lrig3         | leucine-rich repeats and immunoglobulin-like domains 3                         | -1.2  | 0.283 | -1.44 | 0.088 | -1.34 | 0.303 | -1.11 | 0.889 | -1.27 |
| 1423249_at   | Nktr          | natural killer tumor recognition sequence                                      | -1.51 | 0.298 | -1.36 | 0.216 | -1.14 | 0.565 | -1.53 | 0.127 | -1.38 |
| 1440377_at   | Tigd5         | tigger transposable element derived 5                                          | -1.18 | 0.851 | -1.66 | 0.513 | -1.21 | 0.678 | -1.2  | 0.699 | -1.31 |
| 1438771_at   | Brd1          | bromodomain containing 1                                                       | -1.11 | 0.674 | -1.63 | 0.007 | -1.32 | 0.21  | -1.36 | 0.231 | -1.35 |
| 1443253_at   | Glis3         | GLIS family zinc finger 3                                                      | -1    | 0.993 | -1.14 | 0.567 | -2.49 | 0.008 | -1.4  | 0.272 | -1.51 |
| 1460082_at   | Ing3          | inhibitor of growth family, member 3                                           | -1.33 | 0.563 | -1.56 | 0.101 | -1.14 | 0.316 | -1.55 | 0.267 | -1.39 |
| 1447023_at   | ---           | ---                                                                            | -1.12 | 0.619 | -1.94 | 0.009 | -1.16 | 0.261 | -1.09 | 0.485 | -1.33 |
| 1418777_at   | Ccl25         | chemokine (C-C motif) ligand 25                                                | -1.33 | 0.097 | -1.56 | 0.21  | -1.14 | 0.551 | -1.02 | 0.954 | -1.26 |
| 1447400_at   | Ryk           | receptor-like tyrosine kinase                                                  | -1.08 | 0.855 | -2.29 | 0.191 | -1.09 | 0.765 | -1.61 | 0.542 | -1.52 |
| 1434511_at   | Phkb          | phosphorylase kinase beta                                                      | -1.18 | 0.546 | -1.48 | 0.011 | -1.33 | 0.186 | -1.22 | 0.365 | -1.3  |
| 1460147_at   | A730009E18Rik | RIKEN cDNA A730009E18 gene                                                     | -1.08 | 0.827 | -1.16 | 0.67  | -2.05 | 0.032 | -1.13 | 0.856 | -1.35 |
| 1438363_at   | LOC434128     | similar to KIAA1183 protein                                                    | -1.5  | 0.431 | -1.47 | 0.396 | -1.08 | 0.707 | -2.27 | 0.14  | -1.58 |
| 1459570_at   | Gpr143        | G protein-coupled receptor 143                                                 | -1.38 | 0.567 | -1.49 | 0.596 | -1.14 | 0.823 | -1.05 | 0.886 | -1.27 |
| 1460200_s_at | Lztf1         | leucine zipper transcription factor-like 1                                     | -1.37 | 0.151 | -1.21 | 0.112 | -1.39 | 0.29  | -1.29 | 0.368 | -1.32 |
| 1437387_at   | Susd5         | sushi domain containing 5                                                      | -1.2  | 0.712 | -1.54 | 0.238 | -1.27 | 0.584 | -1.68 | 0.384 | -1.42 |
| 1456526_at   | C130034I24Rik | RIKEN cDNA C130034I24 gene                                                     | -1.07 | 0.349 | -1.24 | 0.385 | -1.86 | 0.007 | -1.43 | 0.124 | -1.4  |
| 1441550_at   | 9330184L24Rik | RIKEN cDNA 9330184L24 gene                                                     | -2.41 | 0.465 | -1    | 1     | -1.16 | 0.832 | -1.84 | 0.322 | -1.6  |
| 1451160_s_at | Pvr           | poliovirus receptor                                                            | -1.55 | 0.095 | -1.17 | 0.586 | -1.29 | 0.346 | -1.19 | 0.317 | -1.3  |
| 1456916_at   | Nsd1          | Nuclear receptor-binding SET-domain protein 1                                  | -1.22 | 0.418 | -1.15 | 0.243 | -1.69 | 0.03  | -1.44 | 0.208 | -1.38 |
| 1454617_at   | Arrdc3        | arrestin domain containing 3                                                   | -1.25 | 0.234 | -1.22 | 0.507 | -1.54 | 0.039 | -1.06 | 0.831 | -1.27 |
| 1446598_at   | Prkca         | Protein kinase C, alpha                                                        | -1.38 | 0.488 | -1.11 | 0.712 | -1.53 | 0.16  | -1.33 | 0.313 | -1.34 |
| 1430220_at   | 4833420G17Rik | RIKEN cDNA 4833420G17 gene                                                     | -1.23 | 0.446 | -1.21 | 0.474 | -1.56 | 0.143 | -1.36 | 0.126 | -1.34 |
| 1445182_at   | Zfp672        | Zinc finger protein 672                                                        | -1.08 | 0.768 | -1.11 | 0.698 | -2.2  | 0.211 | -2.38 | 0.004 | -1.69 |
| 1445941_at   | Atbf1         | AT motif binding factor 1                                                      | -1.18 | 0.489 | -1.3  | 0.257 | -1.51 | 0.103 | -1.3  | 0.456 | -1.32 |
| 1442710_at   | Pdlim5        | PDZ and LIM domain 5                                                           | -1.22 | 0.447 | -1.19 | 0.226 | -1.62 | 0.076 | -1.4  | 0.23  | -1.36 |
| 1445758_at   | BC049816      | CDNA sequence BC049816                                                         | -1.34 | 0.063 | -1.06 | 0.209 | -1.7  | 0.019 | -1.44 | 0.065 | -1.39 |
| 1443126_at   | Slc12a1       | Solute carrier family 12, member 1                                             | -1.25 | 0.027 | -1.08 | 0.838 | -1.83 | 0.249 | -1.64 | 0.444 | -1.45 |
| 1422216_at   | Mid2          | midline 2                                                                      | -1.14 | 0.489 | -1.62 | 0.06  | -1.28 | 0.364 | -1.05 | 0.67  | -1.27 |
| 1459682_at   | LOC434249     | hypothetical LOC434249                                                         | -1.12 | 0.637 | -1.6  | 0.12  | -1.32 | 0.428 | -1.64 | 0.218 | -1.42 |
| 1448673_at   | Pvrl3         | poliovirus receptor-related 3                                                  | -1.23 | 0.179 | -1.14 | 0.01  | -1.7  | 0.007 | -1.41 | 0.108 | -1.37 |
| 1458048_at   | 6720406K03    | hypothetical protein 6720406K03                                                | -1.26 | 0.536 | -1.2  | 0.664 | -1.53 | 0.247 | -1.61 | 0.633 | -1.4  |
| 1457346_at   | ---           | Transcribed locus                                                              | -1.02 | 0.984 | -1.85 | 0.307 | -1.33 | 0.533 | -2.32 | 0.383 | -1.63 |
| 1455987_at   | Sec61a1       | Sec61 alpha 1 subunit (S. cerevisiae)                                          | -1.11 | 0.632 | -1.5  | 0.044 | -1.4  | 0.177 | -1.47 | 0.049 | -1.37 |
| 1442738_at   | Crebl2        | CAMP responsive element binding protein-like 2                                 | -1.15 | 0.438 | -1.1  | 0.871 | -1.99 | 0.286 | -1.95 | 0.062 | -1.55 |
| 1446293_at   | Bcl11a        | B-cell CLL/lymphoma 11A (zinc finger protein)                                  | -1.39 | 0.077 | -1.52 | 0.274 | -1.11 | 0.667 | -1.25 | 0.404 | -1.32 |
| 1438310_at   | ---           | 10 days neonate cerebellum cDNA, RIKEN full-length enriched library, clone:B93 | -1.1  | 0.812 | -1.45 | 0.493 | -1.48 | 0.152 | -1.45 | 0.043 | -1.37 |
| 1445421_at   | ---           | Transcribed locus                                                              | -1.14 | 0.487 | -1.17 | 0.734 | -1.83 | 0.098 | -1.03 | 0.871 | -1.29 |
| 1427818_at   | Bcl2          | B-cell leukemia/lymphoma 2                                                     | -1.71 | 0.411 | -1.13 | 0.764 | -1.24 | 0.577 | -1.14 | 0.589 | -1.3  |
| 1457381_at   | Angpt1        | Angiopoietin 1                                                                 | -1.08 | 0.856 | -1.92 | 0.001 | -1.21 | 0.405 | -4.76 | 0.05  | -2.24 |
| 1428536_at   | Kcng4         | potassium voltage-gated channel, subfamily G, member 4                         | -2.03 | 0.143 | -1.17 | 0.8   | -1.07 | 0.806 | -1.1  | 0.269 | -1.34 |
| 1430247_at   | Daam2         | dishevelled associated activator of morphogenesis 2                            | -1.27 | 0.154 | -1.91 | 0.127 | -1.03 | 0.942 | -1.47 | 0.649 | -1.42 |
| 1455549_at   | Sestd1        | SEC14 and spectrin domains 1                                                   | -1.21 | 0.17  | -1.19 | 0.198 | -1.64 | 0.022 | -1.49 | 0.158 | -1.38 |
| 1445737_at   | 1700057H21Rik | RIKEN cDNA 1700057H21 gene                                                     | -1.41 | 0.617 | -1.35 | 0.107 | -1.2  | 0.359 | -1.12 | 0.793 | -1.27 |
| 1458266_at   | Mad11         | Mitotic arrest deficient 1-like 1                                              | -1.18 | 0.701 | -2.01 | 0.314 | -1.07 | 0.866 | -2.26 | 0.352 | -1.63 |
| 1441956_s_at | ---           | ---                                                                            | -1.3  | 0.447 | -1.12 | 0.634 | -1.62 | 0.126 | -1.68 | 0.086 | -1.43 |
| 1436273_at   | Pms2          | postmeiotic segregation increased 2 (S. cerevisiae)                            | -1.54 | 0.043 | -1.54 | 0.184 | -1.02 | 0.941 | -1.04 | 0.863 | -1.28 |
| 1449241_at   | Klhl1         | kelch-like 1 (Drosophila)                                                      | -1.08 | 0.366 | -1.64 | 0.178 | -1.34 | 0.356 | -1.3  | 0.229 | -1.34 |
| 1431205_at   | Slc9a8        | Solute carrier family 9 (sodium/hydrogen exchanger), member 8                  | -1.4  | 0.58  | -1.04 | 0.957 | -1.65 | 0.08  | -2.77 | 0.056 | -1.71 |

|              |               |                                                                                 |       |       |       |       |       |       |       |       |       |
|--------------|---------------|---------------------------------------------------------------------------------|-------|-------|-------|-------|-------|-------|-------|-------|-------|
| 1442198_at   | Nek7          | NIMA (never in mitosis gene a)-related expressed kinase 7                       | -1.1  | 0.757 | -1.77 | 0.144 | -1.24 | 0.413 | -1.23 | 0.426 | -1.33 |
| 1442241_at   | SrpK2         | Serine/arginine-rich protein specific kinase 2                                  | -1.28 | 0.487 | -1.11 | 0.612 | -1.68 | 0.032 | -1.4  | 0.156 | -1.37 |
| 1447203_at   | ---           | ---                                                                             | -1.35 | 0.541 | -1.44 | 0.069 | -1.18 | 0.363 | -1.05 | 0.931 | -1.25 |
| 1429054_at   | Mrpl47        | mitochondrial ribosomal protein L47                                             | -1.19 | 0.203 | -1.4  | 0.02  | -1.38 | 0.028 | -1.13 | 0.489 | -1.27 |
| 1419457_at   | Rgnef         | Rho-guanine nucleotide exchange factor                                          | -1.1  | 0.202 | -2.44 | 0.001 | -1.04 | 0.813 | -3.45 | 0.054 | -2.01 |
| 1429933_at   | Agtpbp1       | ATP/GTP binding protein 1                                                       | -1.13 | 0.836 | -1.27 | 0.557 | -1.64 | 0.029 | -1.38 | 0.308 | -1.35 |
| 1440046_at   | BC031748      | cDNA sequence BC031748                                                          | -1.03 | 0.969 | -2.9  | 0.211 | -1.03 | 0.939 | -1.13 | 0.75  | -1.52 |
| 1448359_a_at | Higd1a        | HIG1 domain family, member 1A                                                   | -1.31 | 0.059 | -1.28 | 0.136 | -1.35 | 0.172 | -1.23 | 0.616 | -1.29 |
| 1432688_at   | 4631422I05Rik | RIKEN cDNA 4631422I05 gene                                                      | -1.05 | 0.918 | -2.18 | 0.103 | -1.15 | 0.803 | -1.44 | 0.601 | -1.45 |
| 1425162_at   | Rorb          | RAR-related orphan receptor beta                                                | -1.28 | 0.805 | -1.98 | 0.093 | -1    | 1     | -1.15 | 0.773 | -1.35 |
| 1445105_at   | Pcaf          | P300/CBP-associated factor                                                      | -1.05 | 0.899 | -1.44 | 0.299 | -1.58 | 0.082 | -1.41 | 0.351 | -1.37 |
| 1443730_at   | 9130404D14Rik | RIKEN cDNA 9130404D14 gene                                                      | -1.1  | 0.885 | -1.26 | 0.631 | -1.72 | 0.383 | -1.34 | 0.575 | -1.35 |
| 1459224_at   | Ppp1r13b      | Protein phosphatase 1, regulatory (inhibitor) subunit 13B                       | -1.66 | 0.417 | -1.08 | 0.774 | -1.32 | 0.095 | -1.33 | 0.363 | -1.35 |
| 1417740_at   | Cdc37I1       | cell division cycle 37 homolog (S. cerevisiae)-like 1                           | -1.41 | 0.263 | -1.3  | 0.006 | -1.24 | 0.136 | -1.07 | 0.481 | -1.26 |
| 1418659_at   | Clock         | circadian locomotor output cycles kaput                                         | -1.07 | 0.716 | -1.45 | 0.081 | -1.52 | 0.01  | -1.25 | 0.409 | -1.32 |
| 1416183_a_at | Ldhb          | lactate dehydrogenase B                                                         | -1.32 | 0.121 | -1.45 | 0.21  | -1.2  | 0.327 | -1.14 | 0.319 | -1.27 |
| 1457468_at   | Tnks2         | Tankyrase, TRF1-interacting ankyrin-related ADP-ribose polymerase 2             | -1.4  | 0.173 | -1.05 | 0.896 | -1.62 | 0.129 | -2.03 | 0.087 | -1.53 |
| 1433062_at   | Wdr66         | WD repeat domain 66                                                             | -1.44 | 0.17  | -1.22 | 0.465 | -1.3  | 0.075 | -1.31 | 0.414 | -1.32 |
| 1442416_at   | D930001B02    | hypothetical protein D930001B02                                                 | -1.14 | 0.38  | -1.24 | 0.024 | -1.65 | 0.089 | -1.41 | 0.286 | -1.36 |
| 1444876_at   | 2700049A03Rik | RIKEN cDNA 2700049A03 gene                                                      | -1.21 | 0.389 | -1.36 | 0.078 | -1.38 | 0.169 | -1.07 | 0.672 | -1.26 |
| 1418835_at   | Phlda1        | pleckstrin homology-like domain, family A, member 1                             | -1.15 | 0.457 | -1.7  | 0.138 | -1.21 | 0.328 | -1.04 | 0.86  | -1.27 |
| 1432861_at   | 2900046F13Rik | RIKEN cDNA 2900046F13 gene                                                      | -1.56 | 0.472 | -1.31 | 0.451 | -1.14 | 0.548 | -1.08 | 0.764 | -1.27 |
| 1431181_a_at | Luc7I         | Luc7 homolog (S. cerevisiae)-like                                               | -1.49 | 0.038 | -1.5  | 0.095 | -1.06 | 0.735 | -1.3  | 0.003 | -1.34 |
| 1440331_at   | 9430079B08Rik | RIKEN cDNA 9430079B08 gene                                                      | -1.12 | 0.522 | -1.38 | 0.309 | -1.49 | 0.141 | -1.12 | 0.402 | -1.28 |
| 1457587_at   | Ga17          | Dendritic cell protein GA17                                                     | -1.02 | 0.745 | -1.22 | 0.699 | -2.07 | 0.013 | -1.51 | 0.207 | -1.45 |
| 1446875_at   | Il1rapl2      | Interleukin 1 receptor accessory protein-like 2                                 | -1.52 | 0.264 | -1.22 | 0.514 | -1.24 | 0.143 | -1.77 | 0.173 | -1.44 |
| 1441685_at   | Prosc         | proline synthetase co-transcribed                                               | -1.24 | 0.03  | -1.54 | 0.309 | -1.21 | 0.607 | -1.09 | 0.844 | -1.27 |
| 1417485_at   | Ibsp          | integrin binding sialoprotein                                                   | -1.04 | 0.92  | -1.16 | 0.13  | -2.15 | 0.046 | -1.16 | 0.095 | -1.38 |
| 1434449_at   | Aqp4          | aquaporin 4                                                                     | -1.11 | 0.506 | -1.54 | 0.373 | -1.36 | 0.164 | -1.8  | 0.121 | -1.45 |
| 1440679_at   | ---           | Transcribed locus                                                               | -1.26 | 0.182 | -1.42 | 0.156 | -1.27 | 0.164 | -1.37 | 0.226 | -1.33 |
| 1440717_at   | AA407881      | expressed sequence AA407881                                                     | -1.21 | 0.379 | -1.21 | 0.014 | -1.58 | 0.087 | -1.41 | 0.238 | -1.35 |
| 1442732_at   | ---           | ---                                                                             | -1.43 | 0.17  | -1.16 | 0.52  | -1.38 | 0.435 | -1.5  | 0.038 | -1.37 |
| 1458148_at   | D230007K08Rik | RIKEN cDNA D230007K08 gene                                                      | -1.33 | 0.015 | -1.77 | 0.217 | -1.03 | 0.922 | -2.47 | 0.048 | -1.65 |
| 1439569_at   | Gpr83         | G protein-coupled receptor 83                                                   | -1.02 | 0.955 | -1.73 | 0.289 | -1.38 | 0.593 | -4.41 | 0.006 | -2.13 |
| 1437667_a_at | Bach2         | BTB and CNC homology 2                                                          | -1.29 | 0.322 | -1.51 | 0.186 | -1.18 | 0.588 | -2.6  | 0.19  | -1.64 |
| 1430776_s_at | Ankrd24       | ankyrin repeat domain 24                                                        | -1.36 | 0.32  | -1.39 | 0.247 | -1.21 | 0.034 | -1.17 | 0.538 | -1.28 |
| 1459237_at   | Atf2          | Activating transcription factor 2                                               | -1.26 | 0.497 | -1.22 | 0.424 | -1.47 | 0.037 | -1.15 | 0.715 | -1.28 |
| 1440896_at   | Sod1          | Superoxide dismutase 1, soluble                                                 | -1.55 | 0.157 | -1.1  | 0.688 | -1.36 | 0.319 | -1.34 | 0.317 | -1.34 |
| 1418042_a_at | Abcc5         | ATP-binding cassette, sub-family C (CFTR/MRP), member 5                         | -1.17 | 0.496 | -1.95 | 0.099 | -1.08 | 0.254 | -1.13 | 0.669 | -1.33 |
| 1421715_at   | V2rx          | pheromone receptor V2Rx                                                         | -1.13 | 0.237 | -1.95 | 0.285 | -1.12 | 0.741 | -1.38 | 0.568 | -1.4  |
| 1441157_at   | C230006B20    | hypothetical LOC403344                                                          | -1.36 | 0.061 | -1.78 | 0.099 | -1.01 | 0.965 | -1.19 | 0.416 | -1.33 |
| 1435629_at   | ---           | Transcribed locus                                                               | -1.17 | 0.62  | -1.37 | 0.382 | -1.43 | 0.006 | -1.07 | 0.908 | -1.26 |
| 1436096_at   | ---           | Adult male corpora quadrigemina cDNA, RIKEN full-length enriched library, clone | -1.36 | 0.127 | -1.09 | 0.844 | -1.57 | 0.148 | -1.15 | 0.703 | -1.29 |
| 1422207_at   | Htr5a         | 5-hydroxytryptamine (serotonin) receptor 5A                                     | -1.08 | 0.89  | -2.11 | 0.135 | -1.13 | 0.842 | -2.57 | 0.222 | -1.72 |
| 1419413_at   | Ccl17         | chemokine (C-C motif) ligand 17                                                 | -1.08 | 0.705 | -1.07 | 0.843 | -2.35 | 0.116 | -2.46 | 0.063 | -1.74 |
| 1459734_at   | Psm14         | Proteasome (prosome, macropain) 26S subunit, non-ATPase, 14                     | -1.23 | 0.071 | -1.3  | 0.27  | -1.42 | 0.271 | -1.04 | 0.84  | -1.25 |
| 1459710_at   | ---           | Transcribed locus                                                               | -1.16 | 0.588 | -1.89 | 0.006 | -1.11 | 0.652 | -1.1  | 0.272 | -1.32 |
| 1458541_at   | Dctn4         | dynactin 4                                                                      | -1.88 | 0.096 | -1.11 | 0.613 | -1.17 | 0.207 | -1.03 | 0.859 | -1.3  |
| 1460035_at   | Phb2          | prohibitin 2                                                                    | -1.04 | 0.832 | -1.37 | 0.2   | -1.67 | 0.109 | -1.21 | 0.013 | -1.32 |
| 1427643_at   | 1200009O22Rik | RIKEN cDNA 1200009O22 gene                                                      | -1.56 | 0.044 | -1.14 | 0.752 | -1.29 | 0.414 | -1.2  | 0.66  | -1.3  |
| 1451834_at   | Caecn1        | calcium channel, voltage-dependent, beta 1 subunit                              | -1.18 | 0.644 | -1.07 | 0.791 | -1.96 | 0.011 | -1.16 | 0.841 | -1.34 |
| 1427702_at   | Zfp1          | zinc finger protein 1                                                           | -1.22 | 0.564 | -1.78 | 0.31  | -1.1  | 0.475 | -1.68 | 0.248 | -1.45 |
| 1455472_at   | A630071D13Rik | RIKEN cDNA A630071D13 gene                                                      | -1.28 | 0.173 | -1.31 | 0.286 | -1.34 | 0.31  | -1.22 | 0.139 | -1.29 |

|              |               |                                                                                    |       |       |       |       |       |       |       |       |       |
|--------------|---------------|------------------------------------------------------------------------------------|-------|-------|-------|-------|-------|-------|-------|-------|-------|
| 1430928_at   | 2900002J02Rik | RIKEN cDNA 2900002J02 gene                                                         | -1.15 | 0.758 | -1.24 | 0.68  | -1.64 | 0.317 | -1.62 | 0.498 | -1.41 |
| 1439683_at   | ---           | In vitro fertilized eggs cDNA, RIKEN full-length enriched library, clone:7420434EC | -1.25 | 0.784 | -1.67 | 0.456 | -1.12 | 0.883 | -1.19 | 0.774 | -1.31 |
| 1432076_at   | 4933430H16Rik | RIKEN cDNA 4933430H16 gene                                                         | -1.11 | 0.882 | -2.34 | 0.245 | -1.04 | 0.87  | -1.12 | 0.826 | -1.4  |
| 1458547_at   | ---           | Transcribed locus                                                                  | -1.46 | 0.608 | -1.28 | 0.486 | -1.22 | 0.594 | -1.57 | 0.209 | -1.38 |
| 1420040_at   | 5730472N09Rik | RIKEN cDNA 5730472N09 gene                                                         | -1.07 | 0.918 | -1.63 | 0.227 | -1.34 | 0.26  | -1.46 | 0.421 | -1.38 |
| 1453268_at   | 5730409G07Rik | RIKEN cDNA 5730409G07 gene                                                         | -1.19 | 0.616 | -1.94 | 0.115 | -1.07 | 0.468 | -1.16 | 0.458 | -1.34 |
| 1418916_a_at | Spp2          | secreted phosphoprotein 2                                                          | -1.22 | 0.165 | -1.38 | 0.047 | -1.34 | 0.557 | -1.14 | 0.835 | -1.27 |
| 1438488_at   | Esd           | esterase D/formylglutathione hydrolase                                             | -1.65 | 0.191 | -1.36 | 0.594 | -1.05 | 0.883 | -2.14 | 0.046 | -1.55 |
| 1418590_at   | Kpna6         | karyopherin (importin) alpha 6                                                     | -1.38 | 0.144 | -1.4  | 0.107 | -1.17 | 0.57  | -1.27 | 0.425 | -1.31 |
| 1418452_at   | Gng2          | guanine nucleotide binding protein (G protein), gamma 2 subunit                    | -1.33 | 0.671 | -1.82 | 0.506 | -1.01 | 0.985 | -1.4  | 0.306 | -1.39 |
| 1438231_at   | Foxp2         | forkhead box P2                                                                    | -1.06 | 0.802 | -1.22 | 0.341 | -1.89 | 0.022 | -1.38 | 0.382 | -1.39 |
| 1441022_at   | Arih1         | ariadne ubiquitin-conjugating enzyme E2 binding protein homolog 1 (Drosophila)     | -1.15 | 0.74  | -1.43 | 0.349 | -1.39 | 0.081 | -1.18 | 0.629 | -1.29 |
| 1429846_at   | 9030411K21Rik | RIKEN cDNA 9030411K21 gene                                                         | -1.58 | 0.047 | -1.04 | 0.906 | -1.44 | 0.136 | -1.47 | 0.286 | -1.38 |
| 1457832_at   | ---           | 7 days neonate cerebellum cDNA, RIKEN full-length enriched library, clone:A730     | -1.2  | 0.485 | -1.64 | 0.064 | -1.17 | 0.137 | -1.1  | 0.697 | -1.28 |
| 1441522_at   | AW495713      | expressed sequence AW495713                                                        | -1.27 | 0.472 | -1.71 | 0.004 | -1.08 | 0.532 | -1.1  | 0.506 | -1.29 |
| 1443943_at   | Plag1         | pleiomorphic adenoma gene 1                                                        | -1.11 | 0.857 | -2.07 | 0.172 | -1.1  | 0.889 | -2.23 | 0.298 | -1.63 |
| 1460667_at   | U90926        | cDNA sequence U90926                                                               | -1.06 | 0.882 | -2.49 | 0.32  | -1.06 | 0.232 | -1.17 | 0.327 | -1.44 |
| 1431783_at   | 1700010L04Rik | RIKEN cDNA 1700010L04 gene                                                         | -1.58 | 0.276 | -1.28 | 0.697 | -1.14 | 0.58  | -2.02 | 0.313 | -1.5  |
| 1446326_at   | Col1a2        | procollagen, type I, alpha 2                                                       | -1.04 | 0.901 | -1.11 | 0.844 | -2.35 | 0.005 | -1.6  | 0.072 | -1.52 |
| 1421152_a_at | Gnao1         | guanine nucleotide binding protein, alpha o                                        | -1.3  | 0.257 | -1.12 | 0.445 | -1.6  | 0.206 | -1.21 | 0.454 | -1.3  |
| 1445933_at   | Slc12a5       | solute carrier family 12, member 5                                                 | -1.12 | 0.252 | -1.22 | 0.364 | -1.74 | 0.016 | -1.19 | 0.581 | -1.31 |
| 1457488_at   | B230339M05Rik | RIKEN cDNA B230339M05 gene                                                         | -1.11 | 0.89  | -1.67 | 0.111 | -1.26 | 0.305 | -3.03 | 0.09  | -1.77 |
| 1445255_at   | Rapgef5       | Rap guanine nucleotide exchange factor (GEF) 5                                     | -1.03 | 0.842 | -1.73 | 0.344 | -1.34 | 0.623 | -1.05 | 0.94  | -1.29 |
| 1441997_at   | Zfp184        | zinc finger protein 184 (Krueppel-like)                                            | -1.14 | 0.794 | -1.92 | 0.342 | -1.12 | 0.611 | -1.47 | 0.487 | -1.41 |
| 1458719_at   | ---           | Transcribed locus                                                                  | -1.3  | 0.038 | -1.33 | 0.374 | -1.28 | 0.335 | -1.08 | 0.296 | -1.25 |
| 1430145_at   | Lrrc28        | leucine rich repeat containing 28                                                  | -1.59 | 0.024 | -1.22 | 0.592 | -1.18 | 0.59  | -1.08 | 0.799 | -1.27 |
| 1420801_at   | Npas1         | neuronal PAS domain protein 1                                                      | -1.18 | 0.012 | -1.52 | 0.473 | -1.27 | 0.16  | -1.58 | 0.011 | -1.39 |
| 1431281_at   | Dysfip1       | dysferlin interacting protein 1                                                    | -1.49 | 0.29  | -1.51 | 0.427 | -1.04 | 0.911 | -2.62 | 0.114 | -1.67 |
| 1444246_at   | Chd2          | Chromodomain helicase DNA binding protein 2                                        | -1.53 | 0.177 | -1.23 | 0.416 | -1.21 | 0.561 | -1.52 | 0.188 | -1.37 |
| 1445280_at   | Ap3d1         | adaptor-related protein complex 3, delta 1 subunit                                 | -1.05 | 0.923 | -1.45 | 0.322 | -1.54 | 0.009 | -1.02 | 0.899 | -1.26 |
| 1420492_s_at | Smr1 /// Smr3 | submaxillary gland androgen regulated protein 1 /// submaxillary gland androgen    | -1.35 | 0.004 | -1.13 | 0.832 | -1.49 | 0.257 | -2.49 | 0.492 | -1.62 |
| 1444018_at   | B930098A02Rik | RIKEN cDNA B930098A02 gene                                                         | -1.16 | 0.628 | -1.37 | 0.165 | -1.42 | 0.02  | -1.18 | 0.51  | -1.28 |
| 1447249_at   | ---           | Transcribed locus                                                                  | -1.8  | 0.076 | -1.03 | 0.864 | -1.29 | 0.515 | -1.51 | 0.105 | -1.41 |
| 1454380_at   | Phactr4       | phosphatase and actin regulator 4                                                  | -1.32 | 0.655 | -1.54 | 0.093 | -1.12 | 0.615 | -1.31 | 0.74  | -1.32 |
| 1447589_at   | Ppp4r1        | Protein phosphatase 4, regulatory subunit 1                                        | -1.44 | 0.488 | -1.34 | 0.655 | -1.17 | 0.171 | -1.16 | 0.446 | -1.28 |
| 1421012_at   | Srprb         | signal recognition particle receptor, B subunit                                    | -1.32 | 0.392 | -1.67 | 0.016 | -1.07 | 0.708 | -1.16 | 0.509 | -1.3  |
| 1440616_at   | AU042410      | expressed sequence AU042410                                                        | -1.2  | 0.611 | -1.33 | 0.485 | -1.4  | 0.596 | -1.04 | 0.924 | -1.24 |
| 1446835_at   | Ftl1          | Ferritin light chain 1                                                             | -1.18 | 0.143 | -1.22 | 0.128 | -1.58 | 0.165 | -1.95 | 0.091 | -1.48 |
| 1430320_at   | Dmd           | dystrophin, muscular dystrophy                                                     | -1.06 | 0.656 | -1.41 | 0.004 | -1.54 | 0.354 | -1.6  | 0.373 | -1.41 |
| 1441426_at   | BC002230      | CDNA sequence BC002230                                                             | -1.54 | 0.426 | -1.18 | 0.341 | -1.25 | 0.287 | -1.05 | 0.909 | -1.25 |
| 1419640_at   | Purb          | purine rich element binding protein B                                              | -1.27 | 0.32  | -1.18 | 0.485 | -1.51 | 0.096 | -1.14 | 0.188 | -1.28 |
| 1460109_at   | Tcf25         | Transcription factor 25 (basic helix-loop-helix)                                   | -1.29 | 0.576 | -1.61 | 0.002 | -1.12 | 0.366 | -1.1  | 0.283 | -1.28 |
| 1430152_at   | Eps15         | epidermal growth factor receptor pathway substrate 15                              | -1.19 | 0.38  | -1.21 | 0.428 | -1.59 | 0.003 | -1.07 | 0.809 | -1.26 |
| 1445566_at   | Centb2        | Centaurin, beta 2                                                                  | -1.14 | 0.652 | -1.66 | 0.353 | -1.22 | 0.581 | -1.15 | 0.544 | -1.29 |
| 1441769_at   | Arl15         | ADP-ribosylation factor-like 15                                                    | -1.16 | 0.25  | -1.04 | 0.817 | -2.11 | 0.053 | -1.28 | 0.35  | -1.4  |
| 1419218_at   | Vangl2        | vang-like 2 (van gogh, Drosophila)                                                 | -1.89 | 0.033 | -1.13 | 0.322 | -1.13 | 0.698 | -1.39 | 0.031 | -1.38 |
| 1435543_at   | Apc           | adenomatosis polyposis coli                                                        | -1.24 | 0.069 | -1.13 | 0.353 | -1.64 | 0.011 | -1.35 | 0.288 | -1.34 |
| 1417623_at   | Slc12a2       | solute carrier family 12, member 2                                                 | -1.1  | 0.731 | -1.16 | 0.799 | -1.9  | 0.041 | -1.08 | 0.854 | -1.31 |
| 1419224_at   | Cecr6         | cat eye syndrome chromosome region, candidate 6 homolog (human)                    | -1.35 | 0.615 | -1.15 | 0.764 | -1.45 | 0.299 | -1.13 | 0.865 | -1.27 |
| 1446058_at   | ---           | PREDICTED: Mus musculus hypothetical protein LOC628925 (LOC628925), mR             | -1.18 | 0.448 | -1.41 | 0.46  | -1.36 | 0.222 | -1.12 | 0.566 | -1.26 |
| 1453193_s_at | Kif12         | kinesin family member 12                                                           | -1.08 | 0.816 | -1.56 | 0.355 | -1.37 | 0.446 | -1.5  | 0.51  | -1.38 |
| 1455329_at   | ---           | ---                                                                                | -1.5  | 0.359 | -1.27 | 0.131 | -1.18 | 0.314 | -1.4  | 0.137 | -1.34 |
| 1438735_at   | Rsf1          | remodeling and spacing factor 1                                                    | -1.62 | 0.034 | -1.05 | 0.737 | -1.37 | 0.122 | -1.17 | 0.137 | -1.3  |

|              |               |                                                                               |       |       |       |       |       |       |       |       |       |
|--------------|---------------|-------------------------------------------------------------------------------|-------|-------|-------|-------|-------|-------|-------|-------|-------|
| 1432622_a_at | 4930507D05Rik | RIKEN cDNA 4930507D05 gene                                                    | -1.07 | 0.94  | -1.29 | 0.341 | -1.71 | 0.213 | -1.21 | 0.306 | -1.32 |
| 1419115_at   | Alg14         | asparagine-linked glycosylation 14 homolog (yeast)                            | -1.14 | 0.489 | -1.37 | 0.036 | -1.44 | 0.059 | -1.06 | 0.87  | -1.25 |
| 1429634_at   | Zfp580        | zinc finger protein 580                                                       | -1.19 | 0.392 | -1.53 | 0.006 | -1.24 | 0.177 | -1.02 | 0.965 | -1.24 |
| 1450176_at   | Ern1          | endoplasmic reticulum (ER) to nucleus signalling 1                            | -1.16 | 0.529 | -1.64 | 0.075 | -1.2  | 0.65  | -1.31 | 0.626 | -1.33 |
| 1439169_at   | Eif4enif1     | Eukaryotic translation initiation factor 4E nuclear import factor 1           | -1.16 | 0.519 | -1.11 | 0.23  | -1.86 | 0.047 | -1.17 | 0.308 | -1.32 |
| 1437705_at   | Zfp551        | zinc finger protein 551                                                       | -1.09 | 0.723 | -1.39 | 0.562 | -1.5  | 0.043 | -1.06 | 0.9   | -1.26 |
| 1445492_at   | Mapre2        | Microtubule-associated protein, RP/EB family, member 2                        | -1.12 | 0.413 | -1.13 | 0.739 | -1.93 | 0.04  | -1.24 | 0.501 | -1.35 |
| 1438221_at   | C130065N10Rik | RIKEN cDNA C130065N10 gene                                                    | -1.24 | 0.459 | -1.33 | 0.253 | -1.35 | 0.116 | -1.36 | 0.033 | -1.32 |
| 1446705_at   | ---           | ---                                                                           | -1.11 | 0.713 | -1.39 | 0.617 | -1.46 | 0.23  | -1.57 | 0.354 | -1.38 |
| 1442616_at   | Grasp         | GRP1 (general receptor for phosphoinositides 1)-associated scaffold protein   | -1.17 | 0.585 | -1.59 | 0.186 | -1.23 | 0.213 | -1.05 | 0.485 | -1.26 |
| 1443233_at   | Gtf2f2        | General transcription factor IIF, polypeptide 2                               | -1.14 | 0.205 | -1.36 | 0.107 | -1.45 | 0.04  | -1.04 | 0.731 | -1.25 |
| 1434212_at   | Ndufs8        | NADH dehydrogenase (ubiquinone) Fe-S protein 8                                | -1.14 | 0.551 | -1.5  | 0.135 | -1.32 | 0.348 | -1.07 | 0.813 | -1.26 |
| 1446876_at   | Wdr22         | WD repeat domain 22                                                           | -1.06 | 0.877 | -1.23 | 0.509 | -1.82 | 0.183 | -1.86 | 0.162 | -1.49 |
| 1423499_at   | Sncaip        | synuclein, alpha interacting protein (synphilin)                              | -1.77 | 0.018 | -1.06 | 0.843 | -1.25 | 0.197 | -1.73 | 0.307 | -1.45 |
| 1421189_at   | Gabbr3        | gamma-aminobutyric acid (GABA-A) receptor, subunit beta 3                     | -1.4  | 0.067 | -1.28 | 0.107 | -1.24 | 0.559 | -1.16 | 0.815 | -1.27 |
| 1419722_at   | Klk8          | kallikrein 8                                                                  | -1.16 | 0.282 | -1.22 | 0.708 | -1.61 | 0.033 | -2.76 | 0.236 | -1.69 |
| 1427794_at   | AJ242955      | hypothetical protein, P4(21)n gene                                            | -1.16 | 0.623 | -1.73 | 0.274 | -1.16 | 0.703 | -2.18 | 0.207 | -1.56 |
| 1435574_at   | Chordc1       | Cysteine and histidine-rich domain (CHORD)-containing, zinc-binding protein 1 | -1.09 | 0.766 | -1.41 | 0.145 | -1.48 | 0.034 | -1.53 | 0.116 | -1.38 |
| 1456216_at   | Csnk1a1       | Casein kinase 1, alpha 1                                                      | -1.24 | 0.328 | -1.09 | 0.513 | -1.72 | 0.014 | -1.12 | 0.031 | -1.29 |
| 1453635_at   | 4932416N17Rik | RIKEN cDNA 4932416N17 gene                                                    | -1.41 | 0.398 | -1.43 | 0.261 | -1.11 | 0.393 | -1.02 | 0.843 | -1.25 |
| 1425229_a_at | Tcf7l2        | transcription factor 7-like 2, T-cell specific, HMG-box                       | -1.09 | 0.76  | -1.41 | 0.212 | -1.47 | 0.082 | -1.34 | 0.145 | -1.33 |
| 1459324_at   | ---           | ---                                                                           | -1.07 | 0.55  | -1.13 | 0.42  | -2.06 | 0.013 | -1.84 | 0.317 | -1.53 |
| 1440163_at   | 6030490B17Rik | RIKEN cDNA 6030490B17 gene                                                    | -1.36 | 0.274 | -1.08 | 0.619 | -1.57 | 0.044 | -1.12 | 0.709 | -1.28 |
| 1444506_at   | Tram1         | Translocating chain-associating membrane protein 1                            | -1.15 | 0.193 | -1.23 | 0.447 | -1.62 | 0.122 | -1.26 | 0.236 | -1.31 |
| 1440552_at   | Ubr1          | Ubiquitin protein ligase E3 component n-recognin 1                            | -2.95 | 0.02  | -1.03 | 0.939 | -1    | 0.979 | -2.13 | 0.369 | -1.78 |
| 1421368_at   | Scrt1         | scratch homolog 1, zinc finger protein (Drosophila)                           | -1.37 | 0.56  | -1.4  | 0.488 | -1.17 | 0.659 | -1.43 | 0.335 | -1.34 |
| 1426302_at   | Tmprss4       | transmembrane protease, serine 4                                              | -1.21 | 0.415 | -1.31 | 0.624 | -1.39 | 0.019 | -1.35 | 0.57  | -1.32 |
| 1459312_at   | ---           | Transcribed locus                                                             | -1.12 | 0.668 | -1.09 | 0.849 | -2.01 | 0.241 | -1.48 | 0.654 | -1.43 |
| 1451004_at   | Acvr2a        | activin receptor IIA                                                          | -1.05 | 0.897 | -1.61 | 0.103 | -1.37 | 0.073 | -1.09 | 0.883 | -1.28 |
| 1429435_x_at | Pik3ca        | phosphatidylinositol 3-kinase, catalytic, alpha polypeptide                   | -1.26 | 0.248 | -1.18 | 0.363 | -1.5  | 0.065 | -1.09 | 0.469 | -1.26 |
| 1430319_at   | 4833411C07Rik | RIKEN cDNA 4833411C07 gene                                                    | -1.51 | 0.335 | -1.16 | 0.589 | -1.28 | 0.018 | -1.11 | 0.773 | -1.27 |
| 1459109_at   | Sema5a        | sema domain, seven thrombospondin repeats (type 1 and type 1-like), transmeml | -1.65 | 0.65  | -1.29 | 0.635 | -1.08 | 0.841 | -1.46 | 0.464 | -1.37 |
| 1436045_at   | Tsga10        | testis specific 10                                                            | -1.22 | 0.583 | -1.22 | 0.525 | -1.5  | 0.168 | -1.1  | 0.669 | -1.26 |
| 1456302_at   | Pex6          | peroxisomal biogenesis factor 6                                               | -1.33 | 0.125 | -1.56 | 0.033 | -1.1  | 0.811 | -1.42 | 0.3   | -1.35 |
| 1420074_at   | D8Ert738e     | DNA segment, Chr 8, ERATO Doi 738, expressed                                  | -1.28 | 0.315 | -1.06 | 0.686 | -1.72 | 0.142 | -1.18 | 0.771 | -1.31 |
| 1441327_a_at | Ssr1          | signal sequence receptor, alpha                                               | -1.14 | 0.169 | -1.2  | 0.116 | -1.67 | 0.06  | -1.02 | 0.951 | -1.26 |
| 1440950_at   | Akt1          | Thymoma viral proto-oncogene 1                                                | -1.39 | 0.328 | -1.25 | 0.311 | -1.27 | 0.569 | -1.25 | 0.135 | -1.29 |
| 1429413_at   | Cpm           | carboxypeptidase M                                                            | -1.25 | 0.091 | -1.53 | 0.123 | -1.18 | 0.461 | -3    | 0.066 | -1.74 |
| 1455659_at   | ---           | ---                                                                           | -1.41 | 0.222 | -1.19 | 0.315 | -1.33 | 0.072 | -1.01 | 0.982 | -1.23 |
| 1455134_at   | A630051L19Rik | RIKEN cDNA A630051L19 gene                                                    | -1.12 | 0.095 | -1.38 | 0.126 | -1.45 | 0.117 | -1.67 | 0.215 | -1.4  |
| 1436679_at   | 2210010N04Rik | RIKEN cDNA 2210010N04 gene                                                    | -1.18 | 0.59  | -1.19 | 0.704 | -1.61 | 0.488 | -2.15 | 0.21  | -1.53 |
| 1433107_at   | ---           | ---                                                                           | -1.46 | 0.169 | -1.03 | 0.944 | -1.53 | 0.023 | -1.11 | 0.804 | -1.28 |
| 1459746_at   | R3hdm1        | R3H domain 1 (binds single-stranded nucleic acids)                            | -1.27 | 0.369 | -1.28 | 0.34  | -1.36 | 0.017 | -1.08 | 0.825 | -1.25 |
| 1444817_at   | Plekhh2       | Pleckstrin homology domain containing, family H (with MyTH4 domain) member 2  | -1.05 | 0.77  | -1.34 | 0.662 | -1.65 | 0.217 | -1.07 | 0.837 | -1.28 |
| 1436261_at   | Dysf          | Dysferlin                                                                     | -1.46 | 0.565 | -1.05 | 0.898 | -1.5  | 0.476 | -1.35 | 0.675 | -1.34 |
| 1425339_at   | Plcb4         | phospholipase C, beta 4                                                       | -1.41 | 0.497 | -1.43 | 0.356 | -1.11 | 0.562 | -2.25 | 0.314 | -1.55 |
| 1423312_at   | Tpbp          | trophoblast glycoprotein                                                      | -1.05 | 0.595 | -1.52 | 0.551 | -1.43 | 0.353 | -2.76 | 0.169 | -1.69 |
| 1445138_at   | A530083I20Rik | RIKEN cDNA A530083I20 gene                                                    | -1.09 | 0.84  | -1.75 | 0.217 | -1.21 | 0.406 | -2.32 | 0.066 | -1.6  |
| 1440511_at   | Psme4         | Proteasome (prosome, macropain) activator subunit 4                           | -1.19 | 0.546 | -1.41 | 0.074 | -1.31 | 0.28  | -1.13 | 0.588 | -1.26 |
| 1435484_at   | BF642829      | expressed sequence BF642829                                                   | -1.14 | 0.694 | -1.82 | 0.133 | -1.14 | 0.477 | -1.6  | 0.026 | -1.42 |
| 1433729_x_at | Pmpcb         | peptidase (mitochondrial processing) beta                                     | -1.43 | 0.166 | -1.44 | 0.024 | -1.1  | 0.314 | -1.16 | 0.195 | -1.28 |
| 1429345_at   | D2Ert435e     | DNA segment, Chr 2, ERATO Doi 435, expressed                                  | -1.33 | 0.266 | -1.2  | 0.114 | -1.39 | 0.151 | -1.3  | 0.063 | -1.3  |
| 1442240_at   | Ctr9          | Ctr9, Paf1/RNA polymerase II complex component, homolog (S. cerevisiae)       | -1.16 | 0.579 | -1.49 | 0     | -1.29 | 0.384 | -1.35 | 0.144 | -1.32 |

|              |                     |                                                                                  |       |       |       |       |       |       |       |       |       |
|--------------|---------------------|----------------------------------------------------------------------------------|-------|-------|-------|-------|-------|-------|-------|-------|-------|
| 1447560_at   | ---                 | ---                                                                              | -1.39 | 0.696 | -1.31 | 0.166 | -1.21 | 0.306 | -1.15 | 0.649 | -1.27 |
| 1432843_at   | 5730405O12Rik       | RIKEN cDNA 5730405O12 gene                                                       | -1.11 | 0.608 | -1.52 | 0.313 | -1.33 | 0.143 | -1.28 | 0.274 | -1.31 |
| 1447516_at   | ---                 | Transcribed locus                                                                | -1.37 | 0.445 | -1.3  | 0.621 | -1.24 | 0.396 | -1.31 | 0.068 | -1.3  |
| 1446101_at   | ---                 | ---                                                                              | -1.19 | 0.724 | -1.11 | 0.702 | -1.78 | 0.065 | -1.6  | 0.077 | -1.42 |
| 1441354_at   | AU018740            | expressed sequence AU018740                                                      | -1.14 | 0.673 | -1.23 | 0.462 | -1.62 | 0.208 | -1.41 | 0.394 | -1.35 |
| 1430261_at   | ---                 | ---                                                                              | -1.5  | 0.265 | -1    | 0.997 | -1.55 | 0.008 | -1.32 | 0.701 | -1.34 |
| 1456221_at   | Cdh8                | Cadherin 8                                                                       | -2.04 | 0.44  | -1.05 | 0.876 | -1.16 | 0.747 | -1.07 | 0.885 | -1.33 |
| 1443795_at   | Tcf19               | transcription factor 19                                                          | -1.01 | 0.992 | -1.66 | 0.473 | -1.41 | 0.579 | -1.4  | 0.437 | -1.37 |
| 1457154_at   | 6-Mar               | Membrane-associated ring finger (C3HC4) 6                                        | -1.02 | 0.942 | -1.49 | 0.146 | -1.53 | 0.24  | -1.17 | 0.595 | -1.3  |
| 1460179_at   | Dnaja1              | DnaJ (Hsp40) homolog, subfamily A, member 1                                      | -1.15 | 0.193 | -1.31 | 0.053 | -1.48 | 0.014 | -1.43 | 0.274 | -1.34 |
| 1459696_at   | Fry                 | Furry homolog (Drosophila)                                                       | -1.78 | 0.134 | -1.14 | 0.574 | -1.15 | 0.807 | -1.93 | 0.218 | -1.5  |
| 1445148_at   | Plcl1               | Phospholipase C-like 1                                                           | -1.04 | 0.885 | -1.03 | 0.919 | -2.66 | 0.056 | -1.44 | 0.247 | -1.54 |
| 1454210_at   | 4933428M09Rik       | RIKEN cDNA 4933428M09 gene                                                       | -1.94 | 0.307 | -1.25 | 0.603 | -1.01 | 0.978 | -1.66 | 0.319 | -1.46 |
| 1460063_at   | D5Ert798e           | DNA segment, Chr 5, ERATO Doi 798, expressed                                     | -1.07 | 0.675 | -1.33 | 0.073 | -1.59 | 0.015 | -1.32 | 0.357 | -1.33 |
| 1429715_at   | Ppp2r2a             | protein phosphatase 2 (formerly 2A), regulatory subunit B (PR 52), alpha isoform | -1.02 | 0.856 | -1.27 | 0.438 | -1.83 | 0.005 | -1    | 0.987 | -1.28 |
| 1458033_at   | Ubr1                | Ubiquitin protein ligase E3 component n-recogin 1                                | -1.03 | 0.898 | -1.39 | 0.074 | -1.61 | 0.001 | -1.16 | 0.53  | -1.3  |
| 1453565_at   | Ndufab1             | NADH dehydrogenase (ubiquinone) 1, alpha/beta subcomplex, 1                      | -1.29 | 0.112 | -1.33 | 0.525 | -1.27 | 0.159 | -1.22 | 0.299 | -1.28 |
| 1430386_at   | E030024N20Rik       | RIKEN cDNA E030024N20 gene                                                       | -1.14 | 0.313 | -1.13 | 0.414 | -1.83 | 0.03  | -1.07 | 0.623 | -1.29 |
| 1423561_at   | Nell2               | NEL-like 2 (chicken)                                                             | -1.11 | 0.873 | -1.84 | 0.48  | -1.15 | 0.757 | -4.24 | 0.348 | -2.09 |
| 1444195_at   | Rmnd5a              | Required for meiotic nuclear division 5 homolog A (S. cerevisiae)                | -1.04 | 0.76  | -1.13 | 0.368 | -2.17 | 0.079 | -1.1  | 0.667 | -1.36 |
| 1445345_at   | Plekha5             | Pleckstrin homology domain containing, family A member 5                         | -1.51 | 0.024 | -1.08 | 0.648 | -1.39 | 0.058 | -1.38 | 0.639 | -1.34 |
| 1420728_at   | Krt32               | keratin 32                                                                       | -1.28 | 0.17  | -1.48 | 0.332 | -1.17 | 0.472 | -1.01 | 0.964 | -1.23 |
| 1427157_at   | Ccdc85a             | coiled-coil domain containing 85A                                                | -1.26 | 0.397 | -1.33 | 0.669 | -1.3  | 0.229 | -1.31 | 0.573 | -1.3  |
| 1439408_a_at | Pparbp              | peroxisome proliferator activated receptor binding protein                       | -1.42 | 0.362 | -1.37 | 0.147 | -1.14 | 0.689 | -1.09 | 0.784 | -1.25 |
| 1430115_at   | 4833413E03Rik       | RIKEN cDNA 4833413E03 gene                                                       | -1.32 | 0.441 | -1    | 0.992 | -1.79 | 0.143 | -1.07 | 0.72  | -1.29 |
| 1420175_at   | Tax1bp1             | Tax1 (human T-cell leukemia virus type I) binding protein 1                      | -1.18 | 0.773 | -1.45 | 0.293 | -1.29 | 0.289 | -1.03 | 0.89  | -1.24 |
| 1453451_at   | 6820402I19Rik       | RIKEN cDNA 6820402I19 gene                                                       | -1.24 | 0.251 | -1.09 | 0.494 | -1.7  | 0.027 | -1.16 | 0.374 | -1.3  |
| 1449425_at   | Wnt2                | wingless-related MMTV integration site 2                                         | -1.6  | 0.572 | -1.39 | 0.027 | -1.03 | 0.92  | -1.94 | 0.106 | -1.49 |
| 1459873_x_at | Maged2              | Melanoma antigen, family D, 2                                                    | -1.02 | 0.944 | -1.74 | 0.165 | -1.31 | 0.357 | -2.03 | 0.238 | -1.53 |
| 1449571_at   | Trhr                | thyrotropin releasing hormone receptor                                           | -2.02 | 0.291 | -1.08 | 0.727 | -1.12 | 0.702 | -2.59 | 0.001 | -1.7  |
| 1416718_at   | Bcan                | brevican                                                                         | -1.46 | 0.707 | -1.34 | 0.591 | -1.13 | 0.602 | -1.07 | 0.906 | -1.25 |
| 1427656_at   | Tcrb-V13            | T-cell receptor beta, variable 13                                                | -1.52 | 0.635 | -1.06 | 0.892 | -1.41 | 0.367 | -3.71 | 0.148 | -1.92 |
| 1440295_at   | 1110057K04Rik       | RIKEN cDNA 1110057K04 gene                                                       | -1.61 | 0.147 | -1.21 | 0.336 | -1.16 | 0.522 | -1.09 | 0.74  | -1.27 |
| 1457356_at   | Igf2r               | Insulin-like growth factor 2 receptor                                            | -1.11 | 0.68  | -1.06 | 0.86  | -2.14 | 0.038 | -1.27 | 0.41  | -1.39 |
| 1422597_at   | Mmp15               | matrix metalloproteinase 15                                                      | -1.24 | 0.593 | -1.51 | 0.12  | -1.19 | 0.235 | -1.52 | 0.366 | -1.36 |
| 1447824_x_at | Hspa5               | heat shock 70kD protein 5 (glucose-regulated protein)                            | -1.61 | 0.121 | -1.27 | 0.172 | -1.1  | 0.545 | -1.07 | 0.319 | -1.26 |
| 1425489_at   | D11Ert730e          | DNA segment, Chr 11, ERATO Doi 730, expressed                                    | -1.39 | 0.093 | -1.28 | 0.394 | -1.23 | 0.12  | -1.08 | 0.882 | -1.25 |
| 1416679_at   | Abcd3               | ATP-binding cassette, sub-family D (ALD), member 3                               | -1.14 | 0.458 | -1.52 | 0.064 | -1.29 | 0.047 | -1.06 | 0.788 | -1.25 |
| 1422574_at   | Mxd4                | Max dimerization protein 4                                                       | -1.02 | 0.489 | -1.46 | 0.057 | -1.54 | 0.079 | -1.36 | 0.14  | -1.35 |
| 1417261_at   | Mbt1                | mbt domain containing 1                                                          | -1.24 | 0.211 | -1.38 | 0.088 | -1.28 | 0.142 | -1.11 | 0.647 | -1.25 |
| 1455519_at   | Dsg1b               | desmoglein 1 beta                                                                | -1.29 | 0.7   | -1.5  | 0.548 | -1.15 | 0.501 | -2.79 | 0.289 | -1.68 |
| 1425771_at   | Akr1d1              | aldo-keto reductase family 1, member D1                                          | -1.6  | 0.047 | -1.31 | 0.042 | -1.08 | 0.856 | -1.16 | 0.718 | -1.29 |
| 1453863_at   | 3300002P09Rik       | RIKEN cDNA 3300002P09 gene                                                       | -1.25 | 0.745 | -1.63 | 0.43  | -1.11 | 0.394 | -1.04 | 0.907 | -1.26 |
| 1421330_at   | Ptpn4               | protein tyrosine phosphatase, non-receptor type 4                                | -1.17 | 0.841 | -1.54 | 0.041 | -1.23 | 0.411 | -1.27 | 0.291 | -1.3  |
| 1439537_at   | ---                 | ---                                                                              | -1.15 | 0.439 | -1.23 | 0.12  | -1.58 | 0.182 | -1.64 | 0.26  | -1.4  |
| 1442306_at   | ---                 | Transcribed locus                                                                | -1.36 | 0.635 | -1.23 | 0.55  | -1.31 | 0.473 | -2.55 | 0.331 | -1.61 |
| 1445128_at   | ---                 | CDNA clone IMAGE:30463708                                                        | -1.4  | 0.33  | -1.12 | 0.855 | -1.4  | 0.041 | -1.17 | 0.458 | -1.27 |
| 1432310_at   | 6530401F13Rik       | RIKEN cDNA 6530401F13 gene                                                       | -1.45 | 0.579 | -1.24 | 0.68  | -1.22 | 0.723 | -1.82 | 0.428 | -1.43 |
| 1454232_at   | 9430027B09Rik       | RIKEN cDNA 9430027B09 gene                                                       | -1.01 | 0.963 | -1.86 | 0.28  | -1.26 | 0.562 | -1.79 | 0.023 | -1.48 |
| 1437619_x_at | Ddr1                | discoidin domain receptor family, member 1                                       | -1.65 | 0.041 | -1.22 | 0.274 | -1.12 | 0.434 | -1.57 | 0.045 | -1.39 |
| 1418446_at   | Slc16a2             | solute carrier family 16 (monocarboxylic acid transporters), member 2            | -1.32 | 0.15  | -1.21 | 0.357 | -1.37 | 0.069 | -1.51 | 0.243 | -1.35 |
| 1436427_at   | Prpf4b              | PRP4 pre-mRNA processing factor 4 homolog B (yeast)                              | -1.22 | 0.14  | -1.15 | 0.492 | -1.59 | 0.074 | -1.16 | 0.662 | -1.28 |
| 1436857_at   | Defcr21 /// Defcr22 | defensin related cryptdin 21 /// defensin related cryptdin 22                    | -1.1  | 0.254 | -1.53 | 0.532 | -1.33 | 0.336 | -1.1  | 0.568 | -1.26 |

|              |                    |                                                                                    |       |       |       |       |       |       |       |       |       |
|--------------|--------------------|------------------------------------------------------------------------------------|-------|-------|-------|-------|-------|-------|-------|-------|-------|
| 1459270_at   | Abcc1              | ATP-binding cassette, sub-family C (CFTR/MRP), member 1                            | -1.07 | 0.71  | -1.46 | 0.139 | -1.43 | 0.185 | -1.07 | 0.791 | -1.26 |
| 1430659_at   | 4930548H24Rik      | RIKEN cDNA 4930548H24 gene                                                         | -1.28 | 0.142 | -1.06 | 0.867 | -1.69 | 0.162 | -1.22 | 0.271 | -1.31 |
| 1436318_at   | Tardbp             | TAR DNA binding protein                                                            | -1.26 | 0.355 | -1.38 | 0.076 | -1.25 | 0.158 | -1.18 | 0.493 | -1.27 |
| 1442022_at   | E430004N04Rik      | RIKEN cDNA E430004N04 gene                                                         | -1.38 | 0.772 | -1.68 | 0.431 | -1    | 0.996 | -2.07 | 0.331 | -1.53 |
| 1446299_at   | 6720456B07Rik      | RIKEN cDNA 6720456B07 gene                                                         | -1.03 | 0.881 | -1.42 | 0     | -1.56 | 0.118 | -1.2  | 0.518 | -1.3  |
| 1428540_at   | 3321401G04Rik      | RIKEN cDNA 3321401G04 gene                                                         | -1.44 | 0.302 | -1.21 | 0.468 | -1.25 | 0.26  | -1.47 | 0.019 | -1.34 |
| 1419176_at   | Vps37a             | vacuolar protein sorting 37A (yeast)                                               | -1.12 | 0.022 | -1.43 | 0.039 | -1.38 | 0.069 | -1.11 | 0.564 | -1.26 |
| 1445952_at   | Magi1              | Membrane associated guanylate kinase, WW and PDZ domain containing 1               | -1.28 | 0.612 | -1.11 | 0.742 | -1.56 | 0.072 | -2.36 | 0.015 | -1.58 |
| 1457649_x_at | Al848149           | expressed sequence Al848149                                                        | -1.46 | 0.345 | -1.16 | 0.684 | -1.29 | 0.397 | -1.86 | 0.047 | -1.44 |
| 1421274_at   | Socs4              | suppressor of cytokine signaling 4                                                 | -1.39 | 0.464 | -1.08 | 0.79  | -1.48 | 0.416 | -1.07 | 0.784 | -1.26 |
| 1424921_at   | Brd4 /// Bst2      | bromodomain containing 4 /// bone marrow stromal cell antigen 2                    | -1.54 | 0.116 | -1.1  | 0.17  | -1.32 | 0.035 | -2.27 | 0.086 | -1.56 |
| 1457062_at   | 1700081L11Rik      | RIKEN cDNA 1700081L11 gene                                                         | -1.15 | 0.129 | -1.18 | 0     | -1.66 | 0.018 | -1.29 | 0.165 | -1.32 |
| 1430272_at   | Gtpbp5             | GTP binding protein 5                                                              | -1.45 | 0.029 | -1.4  | 0.281 | -1.09 | 0.632 | -1.19 | 0.248 | -1.28 |
| 1441225_at   | Gsn                | Gelsolin                                                                           | -1.08 | 0.619 | -1.21 | 0.504 | -1.78 | 0.361 | -1.1  | 0.827 | -1.29 |
| 1431165_at   | A030009A09Rik      | RIKEN cDNA A030009A09 gene                                                         | -1.6  | 0.207 | -1.15 | 0.539 | -1.22 | 0.096 | -1.2  | 0.748 | -1.29 |
| 1429741_at   | Kcnv1              | potassium channel, subfamily V, member 1                                           | -1    | 0.99  | -1.49 | 0.47  | -1.53 | 0.294 | -1.35 | 0.613 | -1.34 |
| 1447693_s_at | Neo1               | neogenin                                                                           | -1.22 | 0.032 | -1.21 | 0.066 | -1.49 | 0.036 | -1.18 | 0.495 | -1.27 |
| 1440764_at   | Araf               | v-raf murine sarcoma 3611 viral oncogene homolog                                   | -1.04 | 0.701 | -1.22 | 0.046 | -1.86 | 0.016 | -1.44 | 0.36  | -1.39 |
| 1423752_at   | Ddx47              | DEAD (Asp-Glu-Ala-Asp) box polypeptide 47                                          | -1.43 | 0.118 | -1.24 | 0.005 | -1.23 | 0.007 | -1.1  | 0.413 | -1.25 |
| 1433010_at   | 5530400N10Rik      | RIKEN cDNA 5530400N10 gene                                                         | -1.77 | 0.058 | -1.13 | 0.503 | -1.15 | 0.595 | -1.06 | 0.64  | -1.28 |
| 1438121_at   | Sec24a             | SEC24 related gene family, member A (S. cerevisiae)                                | -1.17 | 0.524 | -1.26 | 0.101 | -1.49 | 0.339 | -1    | 0.998 | -1.23 |
| 1459265_at   | Myohd1             | myosin head domain containing 1                                                    | -1.17 | 0.586 | -1.59 | 0.43  | -1.19 | 0.561 | -1.07 | 0.827 | -1.26 |
| 1446298_at   | C630016I17Rik      | RIKEN cDNA C630016I17 gene                                                         | -1.07 | 0.484 | -1.3  | 0.096 | -1.63 | 0.028 | -1.81 | 0.184 | -1.45 |
| 1418291_at   | Zfp87              | zinc finger protein 87                                                             | -1.25 | 0.143 | -1.12 | 0.662 | -1.59 | 0.007 | -1.77 | 0.057 | -1.43 |
| 1453897_at   | C030014A21Rik      | RIKEN cDNA C030014A21 gene                                                         | -1.04 | 0.915 | -2    | 0.036 | -1.16 | 0.622 | -1.02 | 0.963 | -1.31 |
| 1442568_at   | C330002I19Rik      | RIKEN cDNA C330002I19 gene                                                         | -1.46 | 0.02  | -1.16 | 0.398 | -1.28 | 0.186 | -1.6  | 0.04  | -1.38 |
| 1435917_at   | ---                | Transcribed locus                                                                  | -1.36 | 0.093 | -1    | 0.969 | -1.69 | 0.033 | -1.05 | 0.872 | -1.28 |
| 1430958_at   | 4933430N04Rik      | RIKEN cDNA 4933430N04 gene                                                         | -1.64 | 0.527 | -1.11 | 0.862 | -1.24 | 0.669 | -1.35 | 0.716 | -1.33 |
| 1429983_at   | 2010002M09Rik      | RIKEN cDNA 2010002M09 gene                                                         | -1.31 | 0.477 | -1.2  | 0.121 | -1.37 | 0.071 | -1.42 | 0.313 | -1.33 |
| 1424462_at   | Ergic2             | ERGIC and golgi 2                                                                  | -1.09 | 0.369 | -1.38 | 0.011 | -1.46 | 0.021 | -1.07 | 0.431 | -1.25 |
| 1446276_at   | 2310008H04Rik      | RIKEN cDNA 2310008H04 gene                                                         | -1.08 | 0.722 | -1.33 | 0.107 | -1.55 | 0.051 | -1.18 | 0.46  | -1.28 |
| 1455144_s_at | AU040829           | expressed sequence AU040829                                                        | -1.01 | 0.936 | -1.96 | 0.035 | -1.22 | 0.075 | -1.17 | 0.56  | -1.34 |
| 1451271_a_at | Acat1              | acetyl-Coenzyme A acetyltransferase 1                                              | -1.23 | 0.116 | -1.48 | 0.157 | -1.2  | 0.191 | -1.09 | 0.113 | -1.25 |
| 1434951_at   | Armc8              | armadillo repeat containing 8                                                      | -1.36 | 0.047 | -1.44 | 0.065 | -1.12 | 0.247 | -1.41 | 0.133 | -1.33 |
| 1424671_at   | Plekhf1            | pleckstrin homology domain containing, family F (with FYVE domain) member 1        | -1.11 | 0.443 | -1.63 | 0.215 | -1.24 | 0.178 | -1.21 | 0.244 | -1.3  |
| 1442939_at   | Rif1 /// LOC671598 | Rap1 interacting factor 1 homolog (yeast) /// similar to Telomere-associated prote | -1.37 | 0.669 | -1.57 | 0.157 | -1.05 | 0.745 | -1.09 | 0.763 | -1.27 |
| 1436632_at   | D130059P03Rik      | RIKEN cDNA D130059P03 gene                                                         | -1.19 | 0.11  | -1.35 | 0.214 | -1.35 | 0.15  | -1.07 | 0.78  | -1.24 |
| 1417549_at   | Zfp68              | zinc finger protein 68                                                             | -1.17 | 0.091 | -1.2  | 0.581 | -1.56 | 0.102 | -1.22 | 0.311 | -1.29 |
| 1445455_at   | D3Ert270e          | DNA segment, Chr 3, ERATO Doi 270, expressed                                       | -1.1  | 0.89  | -1.96 | 0.08  | -1.1  | 0.847 | -1.02 | 0.93  | -1.3  |
| 1458084_at   | Zdhc17             | Zinc finger, DHHC domain containing 17                                             | -1.31 | 0.02  | -1.25 | 0.07  | -1.31 | 0.277 | -1.26 | 0.288 | -1.28 |
| 1428254_at   | Purb               | Purine rich element binding protein B                                              | -1.15 | 0.64  | -1.19 | 0.143 | -1.61 | 0.025 | -1.08 | 0.397 | -1.26 |
| 1437872_at   | AB112350           | cDNA sequence AB112350                                                             | -1.18 | 0.446 | -1.76 | 0.374 | -1.1  | 0.776 | -1.21 | 0.555 | -1.31 |
| 1457138_x_at | Optc               | Opticin                                                                            | -1.28 | 0.193 | -1.31 | 0.51  | -1.28 | 0.4   | -1.59 | 0.474 | -1.36 |
| 1456156_at   | Lepr               | leptin receptor                                                                    | -1.03 | 0.704 | -1.53 | 0.359 | -1.42 | 0.199 | -1.14 | 0.682 | -1.28 |
| 1435899_at   | 9430079B08Rik      | RIKEN cDNA 9430079B08 gene                                                         | -1.17 | 0.356 | -1.44 | 0.332 | -1.29 | 0.411 | -1.21 | 0.273 | -1.28 |
| 1435691_at   | C630028N24Rik      | RIKEN cDNA C630028N24 gene                                                         | -1.12 | 0.36  | -1.34 | 0.366 | -1.47 | 0.005 | -1.23 | 0.5   | -1.29 |
| 1458921_at   | LOC434348          | hypothetical gene supported by AK043371                                            | -1.18 | 0.571 | -1.33 | 0.483 | -1.38 | 0.047 | -1.03 | 0.946 | -1.23 |
| 1430270_at   | 4933411K05Rik      | RIKEN cDNA 4933411K05 gene                                                         | -1.11 | 0.691 | -1.41 | 0.139 | -1.39 | 0.294 | -1.22 | 0.325 | -1.28 |
| 1439676_at   | Aatf               | apoptosis antagonizing transcription factor                                        | -1.21 | 0.55  | -1.21 | 0.653 | -1.48 | 0.031 | -1.34 | 0.455 | -1.31 |
| 1419888_at   | 1110033M05Rik      | RIKEN cDNA 1110033M05 gene                                                         | -1.19 | 0.168 | -1.28 | 0.549 | -1.41 | 0.128 | -1.59 | 0.27  | -1.37 |
| 1440356_at   | Ciapi1             | cytokine induced apoptosis inhibitor 1                                             | -1.51 | 0.493 | -1    | 0.995 | -1.49 | 0.218 | -1.47 | 0.327 | -1.37 |
| 1442956_at   | Ppp1r13b           | Protein phosphatase 1, regulatory (inhibitor) subunit 13B                          | -1.17 | 0.787 | -1.67 | 0.271 | -1.14 | 0.399 | -1.54 | 0.127 | -1.38 |
| 1436487_x_at | Fbxw2              | F-box and WD-40 domain protein 2                                                   | -1.11 | 0.644 | -1.65 | 0.246 | -1.21 | 0.519 | -1.57 | 0.041 | -1.39 |

|              |                    |                                                                                    |       |       |       |       |       |       |       |       |       |
|--------------|--------------------|------------------------------------------------------------------------------------|-------|-------|-------|-------|-------|-------|-------|-------|-------|
| 1431316_at   | Itch               | itchy                                                                              | -1.08 | 0.587 | -1.18 | 0.273 | -1.81 | 0.005 | -1.33 | 0.482 | -1.35 |
| 1447204_at   | Map4k5             | Mitogen-activated protein kinase kinase kinase 5                                   | -1.04 | 0.889 | -2.46 | 0.067 | -1.04 | 0.911 | -1.58 | 0.007 | -1.53 |
| 1443755_at   | ---                | ---                                                                                | -1.12 | 0.865 | -1.16 | 0.759 | -1.74 | 0.098 | -1.96 | 0.122 | -1.49 |
| 1448008_at   | Ankhd1             | ankyrin repeat and KH domain containing 1                                          | -1.2  | 0.409 | -1.41 | 0.023 | -1.27 | 0.339 | -1.28 | 0.456 | -1.29 |
| 1441140_at   | ---                | ---                                                                                | -1.09 | 0.511 | -1.34 | 0.057 | -1.51 | 0.048 | -1.37 | 0.188 | -1.33 |
| 1442307_at   | ---                | Transcribed locus                                                                  | -1.13 | 0.676 | -1.68 | 0.176 | -1.18 | 0.504 | -1.01 | 0.978 | -1.25 |
| 1439775_at   | Brwd3              | bromodomain and WD repeat domain containing 3                                      | -1.4  | 0.237 | -1.11 | 0.449 | -1.39 | 0.008 | -1.1  | 0.25  | -1.25 |
| 1441385_at   | Rhoh               | ras homolog gene family, member H                                                  | -1.34 | 0.265 | -1.42 | 0.304 | -1.14 | 0.667 | -5.48 | 0.002 | -2.34 |
| 1422218_at   | P2rx7              | purinergic receptor P2X, ligand-gated ion channel, 7                               | -1.04 | 0.877 | -1.61 | 0.247 | -1.34 | 0.289 | -1.46 | 0.057 | -1.36 |
| 1437819_s_at | 9530020G05Rik      | RIKEN cDNA 9530020G05 gene                                                         | -1.19 | 0.675 | -1.63 | 0.072 | -1.15 | 0.272 | -1.21 | 0.323 | -1.29 |
| 1457107_at   | Nmt2               | N-myristoyltransferase 2                                                           | -1.39 | 0.017 | -1.19 | 0.624 | -1.31 | 0.306 | -1.09 | 0.699 | -1.24 |
| 1444444_at   | ---                | Adult male medulla oblongata cDNA, RIKEN full-length enriched library, clone:63    | -1.36 | 0.42  | -1.2  | 0.332 | -1.31 | 0.554 | -1.75 | 0.25  | -1.41 |
| 1432331_a_at | Prrx2              | paired related homeobox 2                                                          | -1.39 | 0.492 | -1.3  | 0.626 | -1.19 | 0.313 | -1.42 | 0.023 | -1.32 |
| 1420098_s_at | D13ErtD787e        | DNA segment, Chr 13, ERATO Doi 787, expressed                                      | -1.14 | 0.418 | -1.18 | 0.404 | -1.65 | 0.022 | -1.76 | 0.139 | -1.43 |
| 1445107_at   | A530064N14Rik      | RIKEN cDNA A530064N14 gene                                                         | -1.64 | 0.031 | -1.11 | 0.767 | -1.22 | 0.575 | -1.2  | 0.384 | -1.29 |
| 1443495_at   | Zfp99              | Zinc finger protein 99                                                             | -1.4  | 0.158 | -1.45 | 0.111 | -1.08 | 0.777 | -1.33 | 0.225 | -1.31 |
| 1422850_at   | Pabpn1             | poly(A) binding protein, nuclear 1                                                 | -1.3  | 0.135 | -1.27 | 0.049 | -1.3  | 0.292 | -1.16 | 0.511 | -1.26 |
| 1421350_a_at | Grip1              | glutamate receptor interacting protein 1                                           | -1.47 | 0.33  | -1.34 | 0.441 | -1.1  | 0.69  | -1.05 | 0.951 | -1.24 |
| 1457593_at   | 2610202C22Rik      | RIKEN cDNA 2610202C22 gene                                                         | -1.11 | 0.799 | -1.15 | 0.289 | -1.79 | 0.065 | -1.18 | 0.583 | -1.31 |
| 1442385_at   | Msra               | Methionine sulfoxide reductase A                                                   | -1.28 | 0.813 | -1.77 | 0.076 | -1.01 | 0.965 | -1.27 | 0.51  | -1.33 |
| 1443023_at   | ---                | Transcribed locus                                                                  | -1.24 | 0.677 | -1.53 | 0.162 | -1.14 | 0.714 | -1.34 | 0.123 | -1.32 |
| 1427177_at   | Fyco1              | FYVE and coiled-coil domain containing 1                                           | -1.03 | 0.917 | -1.36 | 0.103 | -1.61 | 0.017 | -1.28 | 0.431 | -1.32 |
| 1420939_at   | Hs6st2             | heparan sulfate 6-O-sulfotransferase 2                                             | -1.12 | 0.696 | -1.96 | 0.277 | -1.07 | 0.912 | -1.23 | 0.722 | -1.35 |
| 1459323_at   | 1700106N22Rik      | RIKEN cDNA 1700106N22 gene                                                         | -1.55 | 0.183 | -1.27 | 0.183 | -1.11 | 0.676 | -1.07 | 0.848 | -1.25 |
| 1455927_x_at | ---                | ---                                                                                | -1.16 | 0.112 | -1.29 | 0.059 | -1.44 | 0.036 | -1.13 | 0.58  | -1.26 |
| 1438960_at   | ---                | ---                                                                                | -1.41 | 0.632 | -1.15 | 0.836 | -1.32 | 0.561 | -4.11 | 0.024 | -2    |
| 1456272_at   | Setd5              | SET domain containing 5                                                            | -1.04 | 0.887 | -1.22 | 0.321 | -1.81 | 0.001 | -1.11 | 0.709 | -1.3  |
| 1425993_a_at | Hsp110             | heat shock protein 110                                                             | -1.11 | 0.628 | -1.54 | 0.106 | -1.28 | 0.285 | -1.09 | 0.824 | -1.25 |
| 1441644_at   | Ptpkr              | Protein tyrosine phosphatase, receptor type, K                                     | -1.05 | 0.862 | -1.31 | 0.535 | -1.63 | 0.428 | -3.82 | 0.095 | -1.95 |
| 1419915_at   | D10ErtD438e        | DNA segment, Chr 10, ERATO Doi 438, expressed                                      | -1.36 | 0.36  | -1.26 | 0.267 | -1.24 | 0.116 | -1.22 | 0.525 | -1.27 |
| 1433016_s_at | 4933412F11Rik ///  | RIKEN cDNA 4933412F11 gene /// RIKEN cDNA 4930529H12 gene /// hypotheti            | -1.51 | 0.013 | -1.24 | 0.38  | -1.16 | 0.483 | -1.02 | 0.864 | -1.23 |
| 1429434_at   | Pik3ca             | phosphatidylinositol 3-kinase, catalytic, alpha polypeptide                        | -1.11 | 0.57  | -1.25 | 0.437 | -1.57 | 0.101 | -1.14 | 0.488 | -1.27 |
| 1425848_a_at | Dusp26             | dual specificity phosphatase 26 (putative)                                         | -1.15 | 0.706 | -1.67 | 0.36  | -1.16 | 0.587 | -1.17 | 0.635 | -1.29 |
| 1440647_at   | Sipa1l1            | signal-induced proliferation-associated 1 like 1                                   | -1.1  | 0.812 | -1.38 | 0.369 | -1.43 | 0.039 | -1.3  | 0.235 | -1.3  |
| 1459552_at   | ---                | Transcribed locus                                                                  | -1.45 | 0.592 | -1.07 | 0.829 | -1.4  | 0.157 | -1.19 | 0.755 | -1.28 |
| 1447021_at   | ---                | CDNA clone IMAGE:5686051                                                           | -1.08 | 0.877 | -1.31 | 0.679 | -1.54 | 0.379 | -1.2  | 0.833 | -1.28 |
| 1434843_at   | A430041B07Rik      | RIKEN cDNA A430041B07 gene                                                         | -1.3  | 0.173 | -1.19 | 0.033 | -1.38 | 0.073 | -1.34 | 0.064 | -1.3  |
| 1433764_at   | Clec2l /// LOC6651 | C-type lectin domain family, member I /// similar to CD69 antigen (p60, early T-ce | -1.33 | 0.246 | -1.41 | 0.053 | -1.14 | 0.036 | -1.12 | 0.269 | -1.25 |
| 1435779_at   | Cep110             | centrosomal protein 110                                                            | -1.19 | 0.29  | -1.71 | 0.001 | -1.1  | 0.363 | -1.57 | 0.017 | -1.39 |
| 1417568_at   | Ncald              | neurocalcin delta                                                                  | -1.15 | 0.219 | -1.21 | 0.3   | -1.57 | 0.028 | -1.21 | 0.569 | -1.28 |
| 1453434_at   | 1110019D14Rik      | RIKEN cDNA 1110019D14 gene                                                         | -1.25 | 0.105 | -1.19 | 0.104 | -1.43 | 0.092 | -1.1  | 0.515 | -1.25 |
| 1424665_at   | 5430405G24Rik      | RIKEN cDNA 5430405G24 gene                                                         | -1.34 | 0.177 | -1.12 | 0.57  | -1.44 | 0.057 | -1.01 | 0.897 | -1.23 |
| 1432601_at   | MIl5               | myeloid/lymphoid or mixed-lineage leukemia 5                                       | -1.22 | 0.395 | -1.64 | 0.071 | -1.11 | 0.716 | -1.5  | 0.223 | -1.37 |
| 1460527_at   | 4933407C09Rik      | RIKEN cDNA 4933407C09 gene                                                         | -1.05 | 0.767 | -1.33 | 0.658 | -1.6  | 0.129 | -1.14 | 0.423 | -1.28 |
| 1447034_at   | Tnpo1              | Transportin 1                                                                      | -1.05 | 0.748 | -1.13 | 0.492 | -2.02 | 0.052 | -1.53 | 0.036 | -1.43 |
| 1443425_at   | Adamts6            | A disintegrin-like and metallopeptidase (repolysin type) with thrombospondin typ   | -1.3  | 0.209 | -1.73 | 0.068 | -1.01 | 0.979 | -1.4  | 0.127 | -1.36 |
| 1437788_at   | Sp6                | trans-acting transcription factor 6                                                | -1.54 | 0.647 | -1.08 | 0.784 | -1.32 | 0.372 | -1.39 | 0.001 | -1.33 |
| 1430917_at   | 9130401L11Rik      | RIKEN cDNA 9130401L11 gene                                                         | -1.03 | 0.929 | -1.48 | 0.468 | -1.45 | 0.477 | -1.52 | 0.413 | -1.37 |
| 1456899_at   | 1500004F05Rik      | RIKEN cDNA 1500004F05 gene                                                         | -1.23 | 0.078 | -1.65 | 0.609 | -1.09 | 0.744 | -1.5  | 0.302 | -1.37 |
| 1441597_at   | Ankhd1             | Ankyrin repeat and KH domain containing 1                                          | -1.12 | 0.511 | -1.14 | 0.591 | -1.77 | 0.01  | -1.12 | 0.288 | -1.29 |
| 1445570_at   | Nsun4              | NOL1/NOP2/Sun domain family, member 4                                              | -1.36 | 0.277 | -1.1  | 0.74  | -1.43 | 0.001 | -1.62 | 0.113 | -1.38 |
| 1438245_at   | ---                | ---                                                                                | -1.03 | 0.893 | -1.07 | 0.724 | -2.32 | 0.036 | -1.17 | 0.6   | -1.4  |
| 1444387_at   | Nmt2               | N-myristoyltransferase 2                                                           | -1.14 | 0.333 | -1.16 | 0.513 | -1.66 | 0.076 | -1.41 | 0.013 | -1.34 |

|              |               |                                                                                 |       |       |       |       |       |       |       |       |       |
|--------------|---------------|---------------------------------------------------------------------------------|-------|-------|-------|-------|-------|-------|-------|-------|-------|
| 1438708_x_at | Ywhab         | tyrosine 3-monooxygenase/tryptophan 5-monooxygenase activation protein, beta    | -1.25 | 0.303 | -1.05 | 0.774 | -1.7  | 0.108 | -1.71 | 0.099 | -1.43 |
| 1436493_at   | LOC626281     | similar to Cortixin-1                                                           | -1.35 | 0.084 | -1.36 | 0.399 | -1.16 | 0.561 | -1.79 | 0.222 | -1.42 |
| 1453591_at   | 5730437N04Rik | RIKEN cDNA 5730437N04 gene                                                      | -1.74 | 0.107 | -1.14 | 0.48  | -1.13 | 0.059 | -1.09 | 0.607 | -1.28 |
| 1423314_s_at | Pde7a         | phosphodiesterase 7A                                                            | -1.12 | 0.136 | -1.45 | 0.255 | -1.32 | 0.059 | -1.75 | 0.137 | -1.41 |
| 1429937_at   | D530033C11Rik | RIKEN cDNA D530033C11 gene                                                      | -2.14 | 0.063 | -1.06 | 0.833 | -1.08 | 0.675 | -1.04 | 0.883 | -1.33 |
| 1455459_at   | Prdm15        | PR domain containing 15                                                         | -1.17 | 0.564 | -1.35 | 0.158 | -1.34 | 0.075 | -1.36 | 0.121 | -1.31 |
| 1449306_at   | Hsf2          | heat shock factor 2                                                             | -1.16 | 0.835 | -1.37 | 0.297 | -1.34 | 0.585 | -1.18 | 0.799 | -1.26 |
| 1457358_at   | ---           | ---                                                                             | -1.23 | 0.156 | -1.2  | 0.566 | -1.43 | 0.264 | -1.04 | 0.809 | -1.23 |
| 1439992_at   | 2610206G21Rik | RIKEN cDNA 2610206G21 gene                                                      | -1.15 | 0.81  | -1.63 | 0.154 | -1.17 | 0.62  | -2.14 | 0.512 | -1.52 |
| 1419582_at   | Cyp2c55       | cytochrome P450, family 2, subfamily c, polypeptide 55                          | -1.21 | 0.405 | -1.24 | 0.706 | -1.42 | 0.489 | -1.1  | 0.899 | -1.24 |
| 1451859_at   | Krtap6-1      | keratin associated protein 6-1                                                  | -1.16 | 0.799 | -1.46 | 0.393 | -1.27 | 0.451 | -1.66 | 0.302 | -1.38 |
| 1417221_at   | ---           | ---                                                                             | -1.08 | 0.733 | -1.44 | 0.298 | -1.38 | 0.207 | -1.78 | 0.467 | -1.42 |
| 1440429_at   | Arpp21        | cyclic AMP-regulated phosphoprotein, 21                                         | -1.38 | 0.692 | -1.03 | 0.962 | -1.56 | 0.309 | -2.17 | 0.122 | -1.53 |
| 1421093_at   | Slc7a10       | solute carrier family 7 (cationic amino acid transporter, y+ system), member 10 | -1.49 | 0.171 | -1.18 | 0.709 | -1.22 | 0.498 | -1.2  | 0.253 | -1.27 |
| 1437129_at   | E330018D03Rik | RIKEN cDNA E330018D03 gene                                                      | -1.31 | 0.11  | -1.1  | 0.68  | -1.49 | 0.111 | -1.54 | 0.375 | -1.36 |
| 1457174_at   | AU015680      | expressed sequence AU015680                                                     | -1.16 | 0.685 | -1.11 | 0.81  | -1.74 | 0.046 | -3.57 | 0.093 | -1.89 |
| 1450896_at   | Arhgap5       | Rho GTPase activating protein 5                                                 | -1.41 | 0.416 | -1.07 | 0.763 | -1.45 | 0.076 | -1.51 | 0.223 | -1.36 |
| 1447086_at   | Smc6l1        | SMC6 structural maintenance of chromosomes 6-like 1 (yeast)                     | -1.29 | 0.56  | -1.04 | 0.895 | -1.65 | 0.051 | -1.13 | 0.798 | -1.28 |
| 1427564_at   | Diap2         | diaphanous homolog 2 (Drosophila)                                               | -1.08 | 0.708 | -1.31 | 0.037 | -1.53 | 0.04  | -1.3  | 0.583 | -1.31 |
| 1444229_at   | Nr2f2         | nuclear receptor subfamily 2, group F, member 2                                 | -1.15 | 0.391 | -1.57 | 0.174 | -1.2  | 0.507 | -1.1  | 0.806 | -1.26 |
| 1447537_at   | 1500032P08Rik | RIKEN cDNA 1500032P08 gene                                                      | -1.02 | 0.838 | -1.63 | 0.058 | -1.34 | 0.268 | -1.21 | 0.525 | -1.3  |
| 1422289_a_at | Ctsq          | cathepsin Q                                                                     | -1.4  | 0.142 | -1.22 | 0.107 | -1.25 | 0.235 | -1.05 | 0.85  | -1.23 |
| 1431568_at   | 4933427E13Rik | RIKEN cDNA 4933427E13 gene                                                      | -1.03 | 0.734 | -2.37 | 0.377 | -1.05 | 0.825 | -1.22 | 0.507 | -1.42 |
| 1459864_at   | Gpr146        | G protein-coupled receptor 146                                                  | -1.24 | 0.529 | -1.6  | 0.2   | -1.1  | 0.793 | -1.13 | 0.659 | -1.27 |
| 1439167_at   | Pecr          | peroxisomal trans-2-enoyl-CoA reductase                                         | -1.65 | 0.036 | -1.28 | 0.319 | -1.05 | 0.838 | -1.06 | 0.897 | -1.26 |
| 1458097_at   | Cobl1         | Cobl-like 1                                                                     | -1.17 | 0.061 | -1.18 | 0.185 | -1.56 | 0.021 | -1.68 | 0.104 | -1.4  |
| 1432822_at   | 4930557B21Rik | RIKEN cDNA 4930557B21 gene                                                      | -1.85 | 0.43  | -1    | 0.987 | -1.24 | 0.356 | -1.35 | 0.582 | -1.36 |
| 1439980_at   | D14Ert725e    | DNA segment, Chr 14, ERATO Doi 725, expressed                                   | -1.31 | 0.219 | -1.03 | 0.762 | -1.64 | 0.089 | -1.28 | 0.226 | -1.31 |
| 1453534_at   | 2810004I08Rik | RIKEN cDNA 2810004I08 gene                                                      | -1.37 | 0.396 | -1.01 | 0.969 | -1.6  | 0.06  | -1.11 | 0.693 | -1.27 |
| 1417179_at   | Tspan5        | tetraspanin 5                                                                   | -1.01 | 0.984 | -1.51 | 0.159 | -1.46 | 0.156 | -1.14 | 0.408 | -1.28 |
| 1458284_at   | Ptbp1         | polypyrimidine tract binding protein 1                                          | -1.49 | 0.006 | -1.33 | 0.221 | -1.09 | 0.693 | -1.08 | 0.788 | -1.25 |
| 1429358_at   | 4921533L14Rik | RIKEN cDNA 4921533L14 gene                                                      | -1.16 | 0.822 | -1.46 | 0.381 | -1.26 | 0.637 | -3.55 | 0.025 | -1.86 |
| 1448156_at   | Tff1          | trefoil factor 1                                                                | -1.29 | 0.568 | -1.51 | 0.235 | -1.11 | 0.676 | -1.01 | 0.951 | -1.23 |
| 1418008_at   | 1810007M14Rik | RIKEN cDNA 1810007M14 gene                                                      | -1.25 | 0.143 | -1.43 | 0.084 | -1.19 | 0.386 | -1.22 | 0.564 | -1.27 |
| 1444890_at   | AA536749      | Expressed sequence AA536749                                                     | -1.17 | 0.453 | -1.11 | 0.711 | -1.7  | 0.069 | -1.3  | 0.319 | -1.32 |
| 1453353_at   | 1700047I16Rik | RIKEN cDNA 1700047I16 gene                                                      | -2.24 | 0.478 | -1.03 | 0.901 | -1.08 | 0.877 | -1.08 | 0.585 | -1.36 |
| 1436540_at   | 6720427I07Rik | RIKEN cDNA 6720427I07 gene                                                      | -1.39 | 0.334 | -1.17 | 0.56  | -1.29 | 0.254 | -1.35 | 0.219 | -1.3  |
| 1437388_at   | Fut10         | fucosyltransferase 10                                                           | -1.12 | 0.619 | -1.62 | 0.359 | -1.19 | 0.494 | -1.5  | 0.143 | -1.36 |
| 1441462_at   | Dock4         | dedicator of cytokinesis 4                                                      | -1.12 | 0.429 | -1.1  | 0.083 | -1.84 | 0.031 | -1.12 | 0.558 | -1.29 |
| 1437942_x_at | Tube1         | epsilon-tubulin 1                                                               | -1.27 | 0.439 | -1.43 | 0.38  | -1.17 | 0.347 | -1.07 | 0.799 | -1.23 |
| 1442759_at   | Akt1          | thymoma viral proto-oncogene 1                                                  | -1.2  | 0.52  | -1.12 | 0.839 | -1.62 | 0.151 | -1.02 | 0.905 | -1.24 |
| 1457639_at   | Atp6v1h       | ATPase, H+ transporting, lysosomal V1 subunit H                                 | -1.18 | 0.402 | -1    | 0.99  | -2    | 0.039 | -1.99 | 0.186 | -1.54 |
| 1421101_a_at | Ldb2          | LIM domain binding 2                                                            | -1.34 | 0.11  | -1.21 | 0.407 | -1.3  | 0.263 | -1.62 | 0.071 | -1.37 |
| 1420187_at   | C76628        | expressed sequence C76628                                                       | -1.95 | 0.056 | -1.19 | 0.815 | -1.01 | 0.979 | -1.26 | 0.665 | -1.35 |
| 1429784_at   | C130032J12Rik | RIKEN cDNA C130032J12 gene                                                      | -1.15 | 0.392 | -1.22 | 0.16  | -1.53 | 0.006 | -1.23 | 0.245 | -1.28 |
| 1442671_at   | Hip2          | Huntingtin interacting protein 2                                                | -1.41 | 0.214 | -1.05 | 0.795 | -1.46 | 0.075 | -1.02 | 0.872 | -1.24 |
| 1450666_s_at | Atxn10        | ataxin 10                                                                       | -1.5  | 0.066 | -1.09 | 0.679 | -1.31 | 0.362 | -1.28 | 0.277 | -1.3  |
| 1425644_at   | Lepr          | leptin receptor                                                                 | -1.21 | 0.359 | -1.44 | 0.599 | -1.22 | 0.35  | -1.28 | 0.251 | -1.28 |
| 1443362_at   | Zfp277        | zinc finger protein 277                                                         | -1.23 | 0.261 | -1.28 | 0.183 | -1.33 | 0.012 | -1.67 | 0.281 | -1.38 |
| 1440068_at   | Rfxdc2        | Regulatory factor X domain containing 2 homolog (human)                         | -1.38 | 0.183 | -1.47 | 0.092 | -1.07 | 0.607 | -2.08 | 0.13  | -1.5  |
| 1422223_at   | Grin2b        | glutamate receptor, ionotropic, NMDA2B (epsilon 2)                              | -1.43 | 0.476 | -1.06 | 0.906 | -1.42 | 0.572 | -2.74 | 0.2   | -1.66 |
| 1421364_at   | Lrtn1         | leucine rich repeat and fibronectin type III domain containing 1                | -1.6  | 0.055 | -1.25 | 0.279 | -1.09 | 0.663 | -1.22 | 0.259 | -1.29 |
| 1447859_at   | Adck2         | aarF domain containing kinase 2                                                 | -1.06 | 0.861 | -1.28 | 0.71  | -1.6  | 0.277 | -1.28 | 0.167 | -1.31 |

|              |               |                                                                             |       |       |       |       |       |       |       |       |       |
|--------------|---------------|-----------------------------------------------------------------------------|-------|-------|-------|-------|-------|-------|-------|-------|-------|
| 1459086_at   | A430107P09Rik | RIKEN cDNA A430107P09 gene                                                  | -1.09 | 0.867 | -2.06 | 0.373 | -1.06 | 0.882 | -1.35 | 0.474 | -1.39 |
| 1434172_at   | Cnr1          | cannabinoid receptor 1 (brain)                                              | -1.15 | 0.844 | -1.08 | 0.915 | -1.82 | 0.067 | -2.46 | 0.046 | -1.63 |
| 1456514_at   | ---           | ---                                                                         | -1.11 | 0.109 | -1.34 | 0.057 | -1.42 | 0.116 | -1.28 | 0.245 | -1.29 |
| 1419261_at   | Acad8         | acyl-Coenzyme A dehydrogenase family, member 8                              | -1.14 | 0.765 | -1.62 | 0.037 | -1.18 | 0.273 | -1.02 | 0.932 | -1.24 |
| 1459722_at   | Zswim6        | Zinc finger, SWIM domain containing 6                                       | -1.13 | 0.316 | -1.12 | 0.27  | -1.77 | 0.041 | -1.74 | 0.077 | -1.44 |
| 1456822_at   | Rad23b        | RAD23b homolog (S. cerevisiae)                                              | -1.37 | 0.485 | -1.17 | 0.069 | -1.32 | 0.182 | -1.52 | 0.339 | -1.34 |
| 1442703_at   | AK220484      | cDNA sequence AK220484                                                      | -1.59 | 0.312 | -1.31 | 0.552 | -1.05 | 0.913 | -1.23 | 0.594 | -1.29 |
| 1421312_a_at | Kifc2         | kinesin family member C2                                                    | -1.31 | 0.647 | -1.4  | 0.237 | -1.15 | 0.723 | -1.91 | 0.361 | -1.44 |
| 1442494_at   | Ubr2          | Ubiquitin protein ligase E3 component n-recogin 2                           | -1.38 | 0.161 | -1.09 | 0.553 | -1.42 | 0.016 | -1.37 | 0.036 | -1.31 |
| 1437994_x_at | Mier2         | mesoderm induction early response 1, family member 2                        | -1.41 | 0.026 | -1.23 | 0.245 | -1.21 | 0.055 | -1.81 | 0.024 | -1.42 |
| 1450242_at   | Tlr5          | toll-like receptor 5                                                        | -1.22 | 0.684 | -1.83 | 0.162 | -1.02 | 0.91  | -1.17 | 0.435 | -1.31 |
| 1420378_at   | Sftpd         | surfactant associated protein D                                             | -1.34 | 0.418 | -1.09 | 0.884 | -1.46 | 0.003 | -1.08 | 0.801 | -1.24 |
| 1459573_at   | Bxdc5         | brix domain containing 5                                                    | -1.19 | 0.394 | -1.21 | 0.1   | -1.48 | 0.023 | -1.31 | 0.252 | -1.29 |
| 1457197_at   | Prkacb        | protein kinase, cAMP dependent, catalytic, beta                             | -1.09 | 0.933 | -1.14 | 0.733 | -1.81 | 0.064 | -1.02 | 0.945 | -1.27 |
| 1432504_at   | 1700106N22Rik | RIKEN cDNA 1700106N22 gene                                                  | -1.32 | 0.505 | -1.45 | 0.204 | -1.11 | 0.788 | -2.05 | 0.038 | -1.48 |
| 1426061_x_at | ---           | ---                                                                         | -1.79 | 0.373 | -1.21 | 0.473 | -1.04 | 0.831 | -1.59 | 0.182 | -1.41 |
| 1424690_at   | 5930434B04Rik | RIKEN cDNA 5930434B04 gene                                                  | -1.04 | 0.918 | -1.45 | 0.091 | -1.43 | 0.254 | -1.72 | 0.073 | -1.41 |
| 1419581_at   | Dlgh4         | discs, large homolog 4 (Drosophila)                                         | -1.11 | 0.787 | -1.81 | 0.213 | -1.12 | 0.697 | -1.43 | 0.516 | -1.37 |
| 1436873_at   | 4732454E20Rik | RIKEN cDNA 4732454E20 gene                                                  | -1.15 | 0.691 | -1.6  | 0.284 | -1.18 | 0.731 | -1.46 | 0.514 | -1.35 |
| 1426082_a_at | Slc16a4       | solute carrier family 16 (monocarboxylic acid transporters), member 4       | -1.06 | 0.265 | -1.95 | 0.093 | -1.12 | 0.079 | -1.02 | 0.934 | -1.29 |
| 1452227_at   | 2310045A20Rik | RIKEN cDNA 2310045A20 gene                                                  | -1.28 | 0.231 | -1.68 | 0.171 | -1.03 | 0.858 | -1.27 | 0.394 | -1.31 |
| 1440872_at   | BC010304      | CDNA sequence BC010304                                                      | -1.68 | 0.165 | -1.31 | 0.511 | -1.01 | 0.964 | -1.27 | 0.487 | -1.32 |
| 1446244_at   | 2810482G21Rik | RIKEN cDNA 2810482G21 gene                                                  | -1.33 | 0.303 | -1.25 | 0.078 | -1.25 | 0.29  | -1.88 | 0.122 | -1.43 |
| 1444406_at   | Map4k3        | Mitogen-activated protein kinase kinase kinase 3                            | -1.02 | 0.893 | -1.15 | 0.479 | -2.01 | 0.014 | -1.2  | 0.107 | -1.34 |
| 1428412_at   | Tm9sf3        | transmembrane 9 superfamily member 3                                        | -1.14 | 0.385 | -1.26 | 0.055 | -1.48 | 0.033 | -1.26 | 0.162 | -1.28 |
| 1452728_at   | Kirrel3       | kin of IRRE like 3 (Drosophila)                                             | -1.24 | 0.627 | -1.42 | 0.174 | -1.19 | 0.416 | -1.49 | 0.581 | -1.34 |
| 1440374_at   | Pde1c         | Phosphodiesterase 1C                                                        | -1.31 | 0.428 | -1.05 | 0.891 | -1.57 | 0.089 | -1    | 0.996 | -1.23 |
| 1436052_at   | 1700020O03Rik | RIKEN cDNA 1700020O03 gene                                                  | -1.18 | 0.634 | -1.15 | 0.457 | -1.59 | 0.01  | -1.42 | 0.11  | -1.33 |
| 1456171_at   | Rnf190        | ring finger protein 190                                                     | -1.4  | 0.266 | -1.37 | 0.444 | -1.1  | 0.489 | -1.1  | 0.822 | -1.24 |
| 1429900_at   | 5330406M23Rik | RIKEN cDNA 5330406M23 gene                                                  | -1.12 | 0.576 | -1.16 | 0.39  | -1.68 | 0.073 | -1.51 | 0.184 | -1.37 |
| 1437045_at   | Mapk8         | mitogen activated protein kinase 8                                          | -1.18 | 0.126 | -1.21 | 0.298 | -1.47 | 0.057 | -1.33 | 0.292 | -1.3  |
| 1430017_at   | 1600016N20Rik | RIKEN cDNA 1600016N20 gene                                                  | -1.38 | 0.015 | -1.6  | 0.43  | -1    | 0.997 | -1.3  | 0.152 | -1.32 |
| 1446521_at   | Psmc14        | Proteasome (prosome, macropain) 26S subunit, non-ATPase, 14                 | -1.17 | 0.534 | -1.46 | 0.013 | -1.23 | 0.195 | -1.24 | 0.103 | -1.28 |
| 1437339_s_at | Pcsk5         | proprotein convertase subtilisin/kexin type 5                               | -1.1  | 0.393 | -1.13 | 0.68  | -1.8  | 0.012 | -1.58 | 0.333 | -1.4  |
| 1456879_at   | C130022K22Rik | RIKEN cDNA C130022K22 gene                                                  | -1.15 | 0.62  | -1.51 | 0.208 | -1.22 | 0.166 | -1.09 | 0.407 | -1.24 |
| 1446773_at   | E230025N22    | Hypothetical protein E230025N22                                             | -1.12 | 0.897 | -1.07 | 0.874 | -1.93 | 0.045 | -1.29 | 0.449 | -1.35 |
| 1442026_at   | ---           | ---                                                                         | -1.2  | 0.846 | -1.18 | 0.645 | -1.5  | 0.476 | -1.46 | 0.15  | -1.33 |
| 1417406_at   | Sertad1       | SERTA domain containing 1                                                   | -1.1  | 0.575 | -1.3  | 0.004 | -1.48 | 0.106 | -1.16 | 0.338 | -1.26 |
| 1444302_at   | BC049816      | cDNA sequence BC049816                                                      | -1.66 | 0.427 | -1.17 | 0.743 | -1.12 | 0.761 | -2.15 | 0.151 | -1.52 |
| 1440022_at   | Poldip3       | polymerase (DNA-directed), delta interacting protein 3                      | -1.06 | 0.852 | -1.48 | 0.323 | -1.37 | 0.14  | -1.35 | 0.244 | -1.31 |
| 1443260_at   | Meis1         | myeloid ecotropic viral integration site 1                                  | -1.09 | 0.5   | -1.17 | 0.692 | -1.74 | 0.116 | -1.17 | 0.575 | -1.29 |
| 1458510_at   | AU019823      | expressed sequence AU019823                                                 | -1.42 | 0.187 | -1.07 | 0.808 | -1.39 | 0.069 | -1.51 | 0.301 | -1.35 |
| 1442979_at   | ---           | PREDICTED: Mus musculus similar to zinc finger protein 709 (LOC629191), mRf | -1.17 | 0.864 | -1.95 | 0.408 | -1.02 | 0.889 | -1.19 | 0.679 | -1.33 |
| 1459942_at   | ORF34         | Open reading frame 34                                                       | -1.17 | 0.544 | -1.14 | 0.738 | -1.61 | 0.163 | -1    | 0.997 | -1.23 |
| 1447450_at   | Pparbp        | Peroxisome proliferator activated receptor binding protein                  | -1.25 | 0.603 | -1.26 | 0.068 | -1.33 | 0.088 | -1.3  | 0.328 | -1.28 |
| 1427200_at   | Zranb1        | zinc finger, RAN-binding domain containing 1                                | -1.11 | 0.492 | -1.34 | 0.019 | -1.41 | 0.031 | -1.01 | 0.943 | -1.22 |
| 1428583_at   | Nufip2        | nuclear fragile X mental retardation protein interacting protein 2          | -1.06 | 0.734 | -1.42 | 0.088 | -1.42 | 0.093 | -1.09 | 0.67  | -1.25 |
| 1441408_at   | AU044856      | expressed sequence AU044856                                                 | -1.11 | 0.782 | -1.34 | 0.58  | -1.41 | 0.31  | -1.16 | 0.778 | -1.26 |
| 1429963_at   | Mapk6         | mitogen-activated protein kinase 6                                          | -1.24 | 0.722 | -1.2  | 0.74  | -1.41 | 0.03  | -1.23 | 0.319 | -1.27 |
| 1426361_at   | Zc3h11a       | zinc finger CCCH type containing 11A                                        | -1.14 | 0.433 | -1.32 | 0.121 | -1.4  | 0.025 | -1.23 | 0.348 | -1.27 |
| 1444473_at   | Pcaf          | P300/CBP-associated factor                                                  | -1.2  | 0.418 | -1.19 | 0.087 | -1.47 | 0.099 | -1.26 | 0.185 | -1.28 |
| 1446889_at   | D2Ert105e     | DNA segment, Chr 2, ERATO Doi 105, expressed                                | -1.12 | 0.911 | -1.32 | 0.468 | -1.43 | 0.418 | -1.4  | 0.442 | -1.32 |
| 1441169_at   | B4galt6       | UDP-Gal:betaGlcNAc beta 1,4-galactosyltransferase, polypeptide 6            | -1.38 | 0.268 | -1.19 | 0.797 | -1.27 | 0.449 | -1.01 | 0.977 | -1.21 |

|              |                   |                                                                                     |       |       |       |       |       |       |       |       |       |
|--------------|-------------------|-------------------------------------------------------------------------------------|-------|-------|-------|-------|-------|-------|-------|-------|-------|
| 1434081_at   | Ap1g1             | adaptor protein complex AP-1, gamma 1 subunit                                       | -1.16 | 0.567 | -1.3  | 0.143 | -1.39 | 0.061 | -1.31 | 0.399 | -1.29 |
| 1443993_at   | Zc3h12a           | zinc finger CCCH type containing 12A                                                | -1.56 | 0.468 | -1.11 | 0.743 | -1.23 | 0.507 | -1.29 | 0.266 | -1.3  |
| 1438033_at   | Tef               | thyrotroph embryonic factor                                                         | -1.54 | 0.405 | -1.28 | 0.498 | -1.08 | 0.769 | -1.2  | 0.23  | -1.27 |
| 1427512_a_at | Lama3 /// LOC6698 | laminin, alpha 3 /// similar to Laminin alpha-3 chain precursor (Nicein alpha subur | -1.41 | 0.062 | -1.24 | 0.799 | -1.19 | 0.636 | -1.59 | 0.334 | -1.36 |
| 1457218_at   | 6430510M02Rik     | RIKEN cDNA 6430510M02 gene                                                          | -1.02 | 0.837 | -1.47 | 0.162 | -1.44 | 0.233 | -2.02 | 0.193 | -1.49 |
| 1436854_at   | Trpc2             | transient receptor potential cation channel, subfamily C, member 2                  | -1.26 | 0.301 | -1.44 | 0.186 | -1.16 | 0.518 | -1.41 | 0.151 | -1.32 |
| 1459173_at   | Ptprd             | protein tyrosine phosphatase, receptor type, D                                      | -2.17 | 0.018 | -1.06 | 0.865 | -1.05 | 0.924 | -1.8  | 0.015 | -1.52 |
| 1454230_a_at | Slc25a27          | solute carrier family 25, member 27                                                 | -1.04 | 0.921 | -1.59 | 0.392 | -1.3  | 0.44  | -1.66 | 0.389 | -1.4  |
| 1442351_a_at | BC029214          | cDNA sequence BC029214                                                              | -1.03 | 0.934 | -2.05 | 0.097 | -1.12 | 0.554 | -2.52 | 0.081 | -1.68 |
| 1446571_at   | A830039H10Rik     | RIKEN cDNA A830039H10 gene                                                          | -1.03 | 0.724 | -1.28 | 0.118 | -1.64 | 0.007 | -1.16 | 0.237 | -1.28 |
| 1420721_at   | 4921536K21Rik     | RIKEN cDNA 4921536K21 gene                                                          | -1.14 | 0.696 | -1.18 | 0.696 | -1.59 | 0.256 | -1.7  | 0.232 | -1.4  |
| 1431560_at   | Dcakd             | dephospho-CoA kinase domain containing                                              | -1.21 | 0.507 | -1.58 | 0.231 | -1.11 | 0.696 | -1.4  | 0.036 | -1.33 |
| 1417425_at   | Prkrip1           | Prkr interacting protein 1 (IL11 inducible)                                         | -1.02 | 0.932 | -1.41 | 0.027 | -1.49 | 0.015 | -1.15 | 0.667 | -1.27 |
| 1418416_x_at | Psg23             | pregnancy-specific glycoprotein 23                                                  | -1.8  | 0.144 | -1.21 | 0.533 | -1.03 | 0.913 | -1.66 | 0.33  | -1.42 |
| 1446722_at   | Gna13             | Guanine nucleotide binding protein, alpha 13                                        | -1.06 | 0.715 | -1.2  | 0.35  | -1.73 | 0.072 | -1.33 | 0.181 | -1.33 |
| 1450935_at   | Ercc5             | excision repair cross-complementing rodent repair deficiency, complementation g     | -1.21 | 0.43  | -1.36 | 0.002 | -1.26 | 0.256 | -1.39 | 0.069 | -1.31 |
| 1457478_at   | Strbp             | Spermatid perinuclear RNA binding protein                                           | -1.17 | 0.68  | -1.35 | 0.561 | -1.32 | 0.119 | -1.98 | 0.253 | -1.45 |
| 1442683_at   | Hmg20a            | high mobility group 20A                                                             | -1.33 | 0.45  | -1.07 | 0.867 | -1.5  | 0.107 | -2.26 | 0.107 | -1.54 |
| 1440873_at   | ---               | ---                                                                                 | -1.71 | 0.033 | -1.08 | 0.582 | -1.18 | 0.359 | -1.04 | 0.942 | -1.25 |
| 1438987_at   | ---               | ---                                                                                 | -1.63 | 0.042 | -1.24 | 0.618 | -1.06 | 0.802 | -1.15 | 0.675 | -1.27 |
| 1440579_at   | ---               | ---                                                                                 | -1.16 | 0.189 | -1.13 | 0.333 | -1.65 | 0.007 | -1.13 | 0.633 | -1.27 |
| 1457642_at   | 5730507N06Rik     | RIKEN cDNA 5730507N06 gene                                                          | -1.26 | 0.225 | -1.17 | 0.258 | -1.41 | 0.321 | -1.08 | 0.881 | -1.23 |
| 1426899_at   | Tbc1d23           | TBC1 domain family, member 23                                                       | -1.53 | 0.123 | -1.23 | 0.191 | -1.12 | 0.35  | -1.24 | 0.633 | -1.28 |
| 1428288_at   | Klf9              | Kruppel-like factor 9                                                               | -1.2  | 0.651 | -1.25 | 0.229 | -1.38 | 0.166 | -1.05 | 0.883 | -1.22 |
| 1423473_at   | 2-Sep             | septin 2                                                                            | -1.27 | 0.525 | -1.15 | 0.672 | -1.42 | 0.299 | -1    | 0.995 | -1.21 |
| 1457454_at   | Usp47             | ubiquitin specific peptidase 47                                                     | -1.01 | 0.966 | -1.35 | 0.313 | -1.59 | 0.043 | -1.3  | 0.234 | -1.31 |
| 1451568_at   | A630054L15Rik     | RIKEN cDNA A630054L15 gene                                                          | -1.11 | 0.506 | -1.3  | 0.426 | -1.45 | 0.13  | -1.04 | 0.887 | -1.23 |
| 1428651_at   | Kihl24            | kelch-like 24 (Drosophila)                                                          | -1.16 | 0.313 | -1.29 | 0.232 | -1.39 | 0.37  | -1.86 | 0.155 | -1.42 |
| 1453874_at   | 4933401B06Rik     | RIKEN cDNA 4933401B06 gene                                                          | -1.26 | 0.531 | -1    | 0.994 | -1.75 | 0.052 | -1.33 | 0.303 | -1.34 |
| 1459332_at   | Itch              | itchy                                                                               | -1.16 | 0.227 | -1.18 | 0.328 | -1.54 | 0.091 | -1.46 | 0.045 | -1.34 |
| 1429538_a_at | 5730406M06Rik     | RIKEN cDNA 5730406M06 gene                                                          | -1.26 | 0.016 | -1.15 | 0.377 | -1.44 | 0.14  | -1.29 | 0.371 | -1.28 |
| 1448112_at   | Cox7c             | cytochrome c oxidase, subunit VIIc                                                  | -1.18 | 0.027 | -1.33 | 0.013 | -1.31 | 0.019 | -1.12 | 0.16  | -1.24 |
| 1429914_at   | Epc1              | enhancer of polycomb homolog 1 (Drosophila)                                         | -1.08 | 0.313 | -1.62 | 0.134 | -1.22 | 0.098 | -1.13 | 0.66  | -1.26 |
| 1433063_at   | Wdr66             | WD repeat domain 66                                                                 | -1.24 | 0.712 | -1.36 | 0.528 | -1.22 | 0.392 | -1.55 | 0.041 | -1.34 |
| 1428637_at   | Dyrk2             | dual-specificity tyrosine-(Y)-phosphorylation regulated kinase 2                    | -1.04 | 0.803 | -1.25 | 0.062 | -1.67 | 0.024 | -1.72 | 0.122 | -1.42 |
| 1419730_at   | 4631427C17Rik     | RIKEN cDNA 4631427C17 gene                                                          | -1.26 | 0.206 | -1.15 | 0.437 | -1.44 | 0.04  | -1.09 | 0.527 | -1.23 |
| 1441364_at   | Gata4             | GATA binding protein 4                                                              | -1.02 | 0.97  | -1.14 | 0.409 | -1.99 | 0.166 | -1.48 | 0.594 | -1.41 |
| 1431391_at   | Ralgps1           | Ral GEF with PH domain and SH3 binding motif 1                                      | -1.37 | 0.262 | -1.06 | 0.855 | -1.46 | 0.012 | -1.03 | 0.851 | -1.23 |
| 1460487_at   | 1110014L15Rik     | RIKEN cDNA 1110014L15 gene                                                          | -1.44 | 0.599 | -1.13 | 0.871 | -1.28 | 0.164 | -1.16 | 0.538 | -1.25 |
| 1440734_at   | Ttbk2             | tau tubulin kinase 2                                                                | -1.13 | 0.69  | -1.4  | 0.208 | -1.32 | 0.477 | -1.3  | 0.73  | -1.29 |
| 1459008_at   | ---               | ---                                                                                 | -1.12 | 0.32  | -1.13 | 0.177 | -1.72 | 0.021 | -1.11 | 0.098 | -1.27 |
| 1443279_at   | Nlk               | Nemo like kinase                                                                    | -1.3  | 0.36  | -1.04 | 0.903 | -1.59 | 0.059 | -1.33 | 0.289 | -1.32 |
| 1445605_s_at | 4921533L14Rik     | RIKEN cDNA 4921533L14 gene                                                          | -1.39 | 0.213 | -1.14 | 0.789 | -1.32 | 0.435 | -2.44 | 0.238 | -1.57 |
| 1421829_at   | Ak3l1             | adenylate kinase 3 alpha-like 1                                                     | -1.04 | 0.848 | -2.26 | 0.042 | -1.04 | 0.945 | -1.1  | 0.654 | -1.36 |
| 1446802_at   | Atox1             | ATX1 (antioxidant protein 1) homolog 1 (yeast)                                      | -1.09 | 0.205 | -1.1  | 0.639 | -1.86 | 0.021 | -1.08 | 0.717 | -1.28 |
| 1443312_at   | Rfx4              | Regulatory factor X, 4 (influences HLA class II expression)                         | -1.18 | 0.534 | -1.41 | 0.288 | -1.25 | 0.784 | -1.06 | 0.903 | -1.22 |
| 1426192_at   | Smarcd2           | SWI/SNF related, matrix associated, actin dependent regulator of chromatin, subf    | -1.39 | 0.029 | -1.16 | 0.564 | -1.28 | 0.268 | -1.32 | 0.298 | -1.29 |
| 1429565_s_at | Lce5a             | late cornified envelope 5A                                                          | -1.18 | 0.872 | -1.69 | 0.253 | -1.09 | 0.807 | -2.19 | 0.019 | -1.54 |
| 1421951_at   | Lhx1              | LIM homeobox protein 1                                                              | -1.15 | 0.134 | -1.56 | 0.141 | -1.18 | 0.822 | -2.89 | 0.054 | -1.69 |
| 1444396_at   | Trp53inp2         | Tumor protein p53 inducible nuclear protein 2                                       | -1.22 | 0.251 | -1.59 | 0.112 | -1.1  | 0.748 | -1.39 | 0.471 | -1.32 |
| 1428467_at   | Tardbp            | TAR DNA binding protein                                                             | -1.21 | 0.057 | -1.31 | 0.135 | -1.29 | 0.249 | -1.31 | 0.4   | -1.28 |
| 1457895_at   | Kif18a            | kinesin family member 18A                                                           | -1.34 | 0.545 | -1.57 | 0.629 | -1.02 | 0.95  | -1.17 | 0.809 | -1.27 |
| 1449329_at   | Zfp235            | zinc finger protein 235                                                             | -1.14 | 0.769 | -1.7  | 0.079 | -1.12 | 0.723 | -2    | 0.268 | -1.49 |

|              |               |                                                                                |       |       |       |       |       |       |       |       |       |
|--------------|---------------|--------------------------------------------------------------------------------|-------|-------|-------|-------|-------|-------|-------|-------|-------|
| 1444184_at   | Alkbh3        | alkB, alkylation repair homolog 3 (E. coli)                                    | -1.4  | 0.04  | -1.13 | 0.433 | -1.3  | 0.303 | -1.01 | 0.818 | -1.21 |
| 1434770_at   | lqcb1         | IQ calmodulin-binding motif containing 1                                       | -1.25 | 0.321 | -1.39 | 0.105 | -1.19 | 0.092 | -1.13 | 0.601 | -1.24 |
| 1455170_at   | 2810001G20Rik | RIKEN cDNA 2810001G20 gene                                                     | -1.07 | 0.522 | -1.58 | 0.003 | -1.25 | 0.418 | -1.28 | 0.524 | -1.3  |
| 1438429_at   | 2610319H10Rik | RIKEN cDNA 2610319H10 gene                                                     | -1.1  | 0.523 | -1.25 | 0.295 | -1.51 | 0.208 | -1.55 | 0.16  | -1.36 |
| 1454770_at   | Cckbr         | cholecystokinin B receptor                                                     | -1.67 | 0.599 | -1    | 0.993 | -1.3  | 0.167 | -1.08 | 0.606 | -1.26 |
| 1431135_at   | ---           | ---                                                                            | -1.21 | 0.405 | -1.45 | 0.18  | -1.18 | 0.546 | -1.14 | 0.841 | -1.24 |
| 1444934_at   | Zfp276        | zinc finger protein (C2H2 type) 276                                            | -1.15 | 0.414 | -1.38 | 0.103 | -1.3  | 0.192 | -1.25 | 0.063 | -1.27 |
| 1432716_at   | Lrrn1         | leucine rich repeat protein 1, neuronal                                        | -1.23 | 0.772 | -1.07 | 0.829 | -1.63 | 0.212 | -1.44 | 0.567 | -1.34 |
| 1418066_at   | Cfl2          | cofilin 2, muscle                                                              | -1.28 | 0.082 | -1.18 | 0.335 | -1.36 | 0.062 | -1.21 | 0.529 | -1.26 |
| 1455449_at   | Gm468         | gene model 468, (NCBI)                                                         | -1.07 | 0.662 | -1.17 | 0.684 | -1.72 | 0.343 | -1.4  | 0.358 | -1.34 |
| 1445759_at   | Smpd3         | Sphingomyelin phosphodiesterase 3, neutral                                     | -1.21 | 0.336 | -1.18 | 0.705 | -1.44 | 0.044 | -1.48 | 0.024 | -1.33 |
| 1439089_at   | Zbtb41        | zinc finger and BTB domain containing 41 homolog                               | -1.16 | 0.21  | -1.48 | 0.009 | -1.21 | 0.037 | -1.01 | 0.914 | -1.22 |
| 1447690_at   | Lsr           | lipolysis stimulated lipoprotein receptor                                      | -2.36 | 0.415 | -1.05 | 0.863 | -1.01 | 0.971 | -2.27 | 0.181 | -1.67 |
| 1437205_at   | Tcf25         | transcription factor 25 (basic helix-loop-helix)                               | -1.18 | 0.182 | -1.28 | 0.005 | -1.35 | 0.108 | -1.24 | 0.311 | -1.26 |
| 1447442_at   | Helz          | Helicase with zinc finger domain                                               | -1.31 | 0.221 | -1.18 | 0.194 | -1.33 | 0.179 | -1.52 | 0.204 | -1.34 |
| 1442766_at   | ---           | Transcribed locus                                                              | -1.63 | 0.309 | -1.03 | 0.904 | -1.27 | 0.453 | -1.51 | 0.047 | -1.36 |
| 1426568_at   | Slc2a9        | solute carrier family 2 (facilitated glucose transporter), member 9            | -1.44 | 0.349 | -1.44 | 0.247 | -1.02 | 0.895 | -1.77 | 0.268 | -1.42 |
| 1420056_s_at | Ptdsr         | phosphatidylserine receptor                                                    | -1.06 | 0.714 | -1.55 | 0.031 | -1.29 | 0.132 | -1.12 | 0.067 | -1.25 |
| 1456575_at   | Ndn           | Necdin                                                                         | -2.23 | 0.166 | -1.07 | 0.909 | -1.02 | 0.961 | -1.07 | 0.923 | -1.35 |
| 1429284_at   | 8430436F23Rik | RIKEN cDNA 8430436F23 gene                                                     | -1.13 | 0.006 | -1.22 | 0.297 | -1.51 | 0.104 | -1.55 | 0.13  | -1.35 |
| 1455366_at   | Mrpl52        | mitochondrial ribosomal protein L52                                            | -1.59 | 0.348 | -1.29 | 0.177 | -1.04 | 0.88  | -1.25 | 0.478 | -1.29 |
| 1442864_at   | Esrra         | estrogen related receptor, alpha                                               | -1.33 | 0.316 | -1.18 | 0.682 | -1.3  | 0.353 | -1.51 | 0.32  | -1.33 |
| 1454970_at   | ---           | ---                                                                            | -1.35 | 0.364 | -1.59 | 0.207 | -1.01 | 0.981 | -1.02 | 0.879 | -1.24 |
| 1445021_at   | 6030465E24Rik | RIKEN cDNA 6030465E24 gene                                                     | -1.18 | 0.688 | -1.41 | 0.547 | -1.24 | 0.647 | -2.13 | 0.011 | -1.49 |
| 1427666_a_at | Tcrb-J        | T-cell receptor beta, joining region                                           | -1.19 | 0.544 | -1.28 | 0.374 | -1.35 | 0.092 | -3.86 | 0.06  | -1.92 |
| 1448975_s_at | Ren1 /// Ren2 | renin 1 structural /// renin 2 tandem duplication of Ren1                      | -1.69 | 0.307 | -1.09 | 0.777 | -1.16 | 0.239 | -1.42 | 0.502 | -1.34 |
| 1434420_x_at | Tomm22        | translocase of outer mitochondrial membrane 22 homolog (yeast)                 | -1.17 | 0.234 | -1.21 | 0.244 | -1.46 | 0.039 | -1.14 | 0.547 | -1.25 |
| 1453384_at   | 4632404N19Rik | RIKEN cDNA 4632404N19 gene                                                     | -1.05 | 0.87  | -1.47 | 0.021 | -1.37 | 0.081 | -1.7  | 0.2   | -1.4  |
| 1454604_s_at | Tspan12       | tetraspanin 12                                                                 | -1.31 | 0.315 | -1.09 | 0.516 | -1.47 | 0.101 | -1.08 | 0.599 | -1.24 |
| 1458156_at   | E230012J19Rik | RIKEN cDNA E230012J19 gene                                                     | -1.21 | 0.059 | -1.23 | 0.289 | -1.38 | 0.237 | -1.22 | 0.421 | -1.26 |
| 1453710_at   | Tmem116       | transmembrane protein 116                                                      | -1.04 | 0.507 | -1.31 | 0.658 | -1.56 | 0.229 | -2.27 | 0.145 | -1.54 |
| 1434656_at   | B230339M05Rik | RIKEN cDNA B230339M05 gene                                                     | -1.14 | 0.231 | -1.39 | 0.043 | -1.3  | 0.089 | -1.2  | 0.12  | -1.26 |
| 1447913_x_at | Akap9         | A kinase (PRKA) anchor protein (yotiao) 9                                      | -1.18 | 0.144 | -1.6  | 0.165 | -1.12 | 0.714 | -1.42 | 0.333 | -1.33 |
| 1441253_at   | Rfx3          | Regulatory factor X, 3 (influences HLA class II expression)                    | -1.13 | 0.698 | -1.31 | 0.092 | -1.39 | 0.197 | -1.43 | 0.047 | -1.32 |
| 1442692_at   | Mapkap1       | Mitogen-activated protein kinase associated protein 1                          | -1.15 | 0.662 | -1.28 | 0.357 | -1.4  | 0.271 | -1.26 | 0.338 | -1.27 |
| 1434283_at   | Arid5b        | AT rich interactive domain 5B (Mrf1 like)                                      | -1.14 | 0.315 | -1.57 | 0.166 | -1.18 | 0.254 | -1.28 | 0.293 | -1.29 |
| 1439317_at   | Krit1         | KRIT1, ankyrin repeat containing                                               | -1.18 | 0.603 | -1.3  | 0.24  | -1.33 | 0.164 | -1.62 | 0.024 | -1.36 |
| 1439209_at   | Tcf12         | Transcription factor 12                                                        | -1.29 | 0.416 | -1.04 | 0.91  | -1.58 | 0.004 | -1.38 | 0.084 | -1.32 |
| 1434642_at   | Dhrs8         | dehydrogenase/reductase (SDR family) member 8                                  | -1.05 | 0.531 | -1.78 | 0.032 | -1.17 | 0.21  | -1.31 | 0.459 | -1.33 |
| 1421433_at   | Zfhx4         | zinc finger homeodomain 4                                                      | -1.69 | 0.368 | -1.09 | 0.626 | -1.16 | 0.789 | -1.97 | 0.268 | -1.48 |
| 1442358_at   | AA409587      | expressed sequence AA409587                                                    | -1.23 | 0.001 | -1.11 | 0.239 | -1.53 | 0.032 | -1.23 | 0.267 | -1.27 |
| 1454284_at   | Slc25a25      | solute carrier family 25 (mitochondrial carrier, phosphate carrier), member 25 | -1.02 | 0.966 | -1.38 | 0.556 | -1.51 | 0.314 | -1.08 | 0.88  | -1.25 |
| 1445866_at   | Mast4         | microtubule associated serine/threonine kinase family member 4                 | -1.15 | 0.371 | -1.12 | 0.514 | -1.63 | 0.076 | -1.6  | 0.021 | -1.38 |
| 1436673_at   | 2610020H08Rik | RIKEN cDNA 2610020H08 gene                                                     | -1.18 | 0.509 | -1.14 | 0.653 | -1.55 | 0.016 | -1.64 | 0.035 | -1.38 |
| 1454819_at   | ---           | ---                                                                            | -1.04 | 0.814 | -1.49 | 0.101 | -1.36 | 0.041 | -1.03 | 0.875 | -1.23 |
| 1458919_at   | Mkln1         | muskelin 1, intracellular mediator containing kelch motifs                     | -1.14 | 0.194 | -1.08 | 0.503 | -1.77 | 0.024 | -1.03 | 0.862 | -1.26 |
| 1434692_at   | 1110034B05Rik | RIKEN cDNA 1110034B05 gene                                                     | -1.21 | 0.045 | -1.39 | 0.025 | -1.22 | 0.146 | -1.37 | 0.258 | -1.3  |
| 1444877_at   | ---           | ---                                                                            | -1.8  | 0.261 | -1.01 | 0.979 | -1.22 | 0.576 | -2.56 | 0.048 | -1.65 |
| 1431222_at   | Tiam2         | T-cell lymphoma invasion and metastasis 2                                      | -1.17 | 0.494 | -1.31 | 0.099 | -1.33 | 0.241 | -1.04 | 0.819 | -1.21 |
| 1415769_at   | Itch          | itchy                                                                          | -1.28 | 0.249 | -1.23 | 0.23  | -1.29 | 0.049 | -1.57 | 0.012 | -1.34 |
| 1432160_at   | Git2          | G protein-coupled receptor kinase-interactor 2                                 | -1.18 | 0.676 | -1.53 | 0.47  | -1.15 | 0.568 | -1.92 | 0.118 | -1.44 |
| 1454635_at   | Fbxl3         | F-box and leucine-rich repeat protein 3                                        | -1.33 | 0.103 | -1.06 | 0.334 | -1.47 | 0.113 | -1.41 | 0.162 | -1.32 |
| 1440622_at   | Sec15l2       | SEC15-like 2 (S. cerevisiae)                                                   | -1.2  | 0.654 | -1.03 | 0.885 | -1.77 | 0.04  | -1.52 | 0.503 | -1.38 |

|              |                    |                                                                                        |       |       |       |       |       |       |       |       |       |
|--------------|--------------------|----------------------------------------------------------------------------------------|-------|-------|-------|-------|-------|-------|-------|-------|-------|
| 1453321_at   | Fndc1              | fibronectin type III domain containing 1                                               | -1.18 | 0.372 | -1.36 | 0.205 | -1.27 | 0.478 | -1.03 | 0.838 | -1.21 |
| 1430681_at   | Cryl1              | crystallin, lamda 1                                                                    | -1.34 | 0.057 | -1.27 | 0.428 | -1.2  | 0.278 | -1.46 | 0.378 | -1.32 |
| 1432351_at   | 9030625G05Rik      | RIKEN cDNA 9030625G05 gene                                                             | -1.11 | 0.856 | -1.5  | 0.136 | -1.25 | 0.76  | -2.07 | 0.314 | -1.48 |
| 1431961_at   | Dock8              | dedicator of cytokinesis 8                                                             | -1.09 | 0.486 | -1.25 | 0.193 | -1.54 | 0.223 | -2.24 | 0.06  | -1.53 |
| 1429650_at   | Stk40              | serine/threonine kinase 40                                                             | -1.28 | 0.166 | -1.3  | 0.02  | -1.22 | 0.431 | -1.06 | 0.767 | -1.21 |
| 1447153_x_at | Ulk2               | Unc-51 like kinase 2 (C. elegans)                                                      | -1.03 | 0.926 | -1.44 | 0.158 | -1.42 | 0.235 | -1.49 | 0.248 | -1.35 |
| 1430856_at   | Pex11c             | peroxisomal biogenesis factor 11c                                                      | -1.46 | 0.282 | -1.37 | 0.006 | -1.04 | 0.857 | -1.7  | 0.183 | -1.39 |
| 1415731_at   | Angel2             | angel homolog 2 (Drosophila)                                                           | -1.35 | 0.194 | -1.2  | 0.494 | -1.25 | 0.133 | -1.24 | 0.179 | -1.26 |
| 1459143_at   | Chchd3             | coiled-coil-helix-coiled-coil-helix domain containing 3                                | -1.07 | 0.777 | -1.64 | 0.038 | -1.21 | 0.579 | -1.59 | 0.169 | -1.38 |
| 1459150_at   | Lrch1              | Leucine-rich repeats and calponin homology (CH) domain containing 1                    | -1.29 | 0.008 | -1.11 | 0.612 | -1.43 | 0.12  | -1.73 | 0.074 | -1.39 |
| 1423533_a_at | Rhot1              | ras homolog gene family, member T1                                                     | -1.17 | 0.192 | -1.38 | 0.03  | -1.26 | 0.105 | -1.08 | 0.478 | -1.22 |
| 1456439_x_at | Mical1             | microtubule associated monooxygenase, calponin and LIM domain containing 1             | -1.12 | 0.688 | -1.68 | 0.36  | -1.13 | 0.355 | -2.13 | 0.07  | -1.51 |
| 1418563_at   | Serbp1             | Serpine1 mRNA binding protein 1                                                        | -1.15 | 0.099 | -1.26 | 0.032 | -1.4  | 0.02  | -1.06 | 0.38  | -1.22 |
| 1449647_at   | ---                | Transcribed locus                                                                      | -1.65 | 0.226 | -1.28 | 0.626 | -1.02 | 0.978 | -1.03 | 0.86  | -1.25 |
| 1456997_at   | Ncoa5              | Nuclear receptor coactivator 5                                                         | -1.08 | 0.702 | -1.17 | 0.548 | -1.7  | 0.027 | -1.16 | 0.273 | -1.28 |
| 1443068_at   | D130084N16Rik      | RIKEN cDNA D130084N16 gene                                                             | -1.18 | 0.273 | -1.33 | 0.295 | -1.29 | 0.207 | -1.42 | 0.522 | -1.31 |
| 1446269_at   | Hbp1               | high mobility group box transcription factor 1                                         | -1.33 | 0.284 | -1.34 | 0.512 | -1.14 | 0.686 | -1.41 | 0.208 | -1.31 |
| 1437839_x_at | Mrpl11             | mitochondrial ribosomal protein L11                                                    | -1.34 | 0.141 | -1.03 | 0.888 | -1.52 | 0.003 | -1.35 | 0.296 | -1.31 |
| 1433252_at   | 4932703K07Rik      | RIKEN cDNA 4932703K07 gene                                                             | -1.77 | 0.417 | -1.04 | 0.935 | -1.19 | 0.633 | -1.34 | 0.381 | -1.33 |
| 1418374_at   | Fxyd3              | FXVD domain-containing ion transport regulator 3                                       | -1.12 | 0.783 | -1.06 | 0.734 | -1.85 | 0.018 | -1.28 | 0.459 | -1.33 |
| 1454177_at   | 4930597G03Rik      | RIKEN cDNA 4930597G03 gene                                                             | -1.4  | 0.599 | -1.4  | 0.408 | -1.06 | 0.8   | -1.07 | 0.676 | -1.23 |
| 1428996_at   | 4833426J09Rik      | RIKEN cDNA 4833426J09 gene                                                             | -1.09 | 0.78  | -1.64 | 0.217 | -1.19 | 0.542 | -1.07 | 0.746 | -1.25 |
| 1447504_at   | Ghitm              | Growth hormone inducible transmembrane protein                                         | -1.17 | 0.438 | -1.13 | 0.555 | -1.58 | 0.169 | -1.11 | 0.577 | -1.25 |
| 1430833_at   | Itk                | IL2-inducible T-cell kinase                                                            | -1.04 | 0.926 | -1.31 | 0.683 | -1.54 | 0.207 | -1.72 | 0.342 | -1.4  |
| 1422980_a_at | Bet1l              | blocked early in transport 1 homolog (S. cerevisiae)-like                              | -1.24 | 0.265 | -1.22 | 0.029 | -1.35 | 0.058 | -1.45 | 0.016 | -1.31 |
| 1447821_at   | 1700051K22Rik      | RIKEN cDNA 1700051K22 gene                                                             | -1.61 | 0.072 | -1.27 | 0.065 | -1.04 | 0.824 | -1.5  | 0.051 | -1.35 |
| 1441823_at   | Rai17              | retinoic acid induced 17                                                               | -1.18 | 0.475 | -1.16 | 0.464 | -1.5  | 0.101 | -1.62 | 0.088 | -1.37 |
| 1436316_at   | 9430029L20Rik      | RIKEN cDNA 9430029L20 gene                                                             | -1.33 | 0.642 | -1.19 | 0.573 | -1.28 | 0.393 | -1.28 | 0.498 | -1.27 |
| 1435350_at   | Traf6              | Tnf receptor-associated factor 6                                                       | -1.17 | 0.339 | -1.38 | 0.41  | -1.27 | 0.116 | -1.36 | 0.323 | -1.29 |
| 1422575_at   | Mxd4 /// LOC63515  | Max dimerization protein 4 /// similar to Max dimerization protein 4                   | -1.54 | 0.05  | -1.27 | 0.176 | -1.07 | 0.848 | -1.17 | 0.731 | -1.26 |
| 1429356_s_at | Ggps1              | geranylgeranyl diphosphate synthase 1                                                  | -1.11 | 0.408 | -1.99 | 0.038 | -1.04 | 0.746 | -1.07 | 0.629 | -1.3  |
| 1417866_at   | Tnfaip1            | tumor necrosis factor, alpha-induced protein 1 (endothelial)                           | -1.23 | 0.2   | -1.13 | 0.514 | -1.47 | 0.04  | -1.38 | 0.064 | -1.3  |
| 1444726_at   | Krr1               | KRR1, small subunit (SSU) processome component, homolog (yeast)                        | -1.19 | 0.315 | -1.49 | 0.101 | -1.16 | 0.534 | -1.4  | 0.209 | -1.31 |
| 1432719_at   | 4833412K13Rik      | RIKEN cDNA 4833412K13 gene                                                             | -1.19 | 0.019 | -1.2  | 0.031 | -1.43 | 0.124 | -1.17 | 0.594 | -1.25 |
| 1436798_at   | Rpl9 /// LOC43276  | ribosomal protein L9 /// similar to ribosomal protein L9 /// similar to ribosomal prot | -1.25 | 0.018 | -1.34 | 0.066 | -1.2  | 0.233 | -1.36 | 0.141 | -1.29 |
| 1457455_at   | Suhw4              | suppressor of hairy wing homolog 4 (Drosophila)                                        | -1.13 | 0.403 | -1.17 | 0.135 | -1.58 | 0.133 | -1    | 0.972 | -1.22 |
| 1455086_at   | Uchl5              | Ubiquitin carboxyl-terminal esterase L5                                                | -1.12 | 0.724 | -1.36 | 0.437 | -1.34 | 0.338 | -1.83 | 0.174 | -1.41 |
| 1417622_at   | Slc12a2            | solute carrier family 12, member 2                                                     | -1.16 | 0.498 | -1.08 | 0.29  | -1.7  | 0.026 | -1.02 | 0.963 | -1.24 |
| 1441716_at   | ---                | 12 days embryo eyeball cDNA, RIKEN full-length enriched library, clone:D230024         | -1.49 | 0.295 | -1.15 | 0.659 | -1.2  | 0.103 | -1.12 | 0.16  | -1.24 |
| 1431566_at   | ---                | ---                                                                                    | -1.24 | 0.519 | -1.37 | 0.029 | -1.19 | 0.284 | -1.14 | 0.635 | -1.24 |
| 1429463_at   | Prkaa2             | protein kinase, AMP-activated, alpha 2 catalytic subunit                               | -1    | 0.998 | -1.42 | 0.302 | -1.49 | 0.193 | -1.21 | 0.745 | -1.28 |
| 1449775_x_at | Slc35a4 /// LOC545 | solute carrier family 35, member A4 /// similar to solute carrier family 35, member    | -1.56 | 0.536 | -1.28 | 0.686 | -1.05 | 0.918 | -1.02 | 0.952 | -1.23 |
| 1428364_at   | Scnm1              | sodium channel modifier 1                                                              | -1.23 | 0.172 | -1.36 | 0.103 | -1.21 | 0.156 | -1.13 | 0.55  | -1.23 |
| 1437557_at   | D3Erd254e          | DNA segment, Chr 3, ERATO Doi 254, expressed                                           | -1.26 | 0.101 | -1.28 | 0.154 | -1.24 | 0.078 | -1.47 | 0.068 | -1.31 |
| 1425289_a_at | Cr2                | complement receptor 2                                                                  | -1.18 | 0.527 | -1.5  | 0.63  | -1.16 | 0.586 | -4.2  | 0.027 | -2.01 |
| 1449581_at   | Emid1              | EMI domain containing 1                                                                | -1.05 | 0.779 | -1.21 | 0.679 | -1.68 | 0.162 | -2.73 | 0.059 | -1.67 |
| 1443350_at   | Mta3               | metastasis associated 3                                                                | -1.31 | 0.328 | -1.25 | 0.484 | -1.23 | 0.202 | -1.47 | 0.169 | -1.32 |
| 1439262_x_at | 2310001A20Rik      | RIKEN cDNA 2310001A20 gene                                                             | -1.21 | 0.584 | -1.31 | 0.232 | -1.27 | 0.066 | -1.43 | 0.204 | -1.31 |
| 1442704_at   | Baz2b              | Bromodomain adjacent to zinc finger domain, 2B                                         | -1.04 | 0.702 | -1.23 | 0.097 | -1.66 | 0.057 | -1.76 | 0.063 | -1.42 |
| 1417525_at   | Hand1              | heart and neural crest derivatives expressed transcript 1                              | -2.01 | 0.227 | -1.1  | 0.793 | -1.03 | 0.921 | -1.35 | 0.537 | -1.37 |
| 1446470_at   | ---                | ---                                                                                    | -1.5  | 0.088 | -1.21 | 0.543 | -1.13 | 0.613 | -1.21 | 0.496 | -1.26 |
| 1432174_a_at | 4933425K02Rik      | RIKEN cDNA 4933425K02 gene                                                             | -1.26 | 0.64  | -1.36 | 0.553 | -1.18 | 0.628 | -1.28 | 0.679 | -1.27 |
| 1431552_at   | 1810006J02Rik      | RIKEN cDNA 1810006J02 gene                                                             | -1.51 | 0.2   | -1.1  | 0.883 | -1.25 | 0.58  | -1.43 | 0.483 | -1.32 |

|              |                   |                                                                                       |       |       |       |       |       |       |       |       |       |
|--------------|-------------------|---------------------------------------------------------------------------------------|-------|-------|-------|-------|-------|-------|-------|-------|-------|
| 1459995_at   | 1700015G11Rik     | RIKEN cDNA 1700015G11 gene                                                            | -1.21 | 0.831 | -1.01 | 0.925 | -1.79 | 0.154 | -1.61 | 0.507 | -1.4  |
| 1456001_at   | LOC545548         | similar to late cornified envelope protein                                            | -1.27 | 0.362 | -1.38 | 0.409 | -1.16 | 0.471 | -1.51 | 0.496 | -1.33 |
| 1418720_at   | Cops7b            | COP9 (constitutive photomorphogenic) homolog, subunit 7b (Arabidopsis thaliana)       | -1.34 | 0.086 | -1.57 | 0.01  | -1    | 0.979 | -1.07 | 0.722 | -1.25 |
| 1449187_at   | Pdgfa             | platelet derived growth factor, alpha                                                 | -1    | 0.96  | -1.54 | 0.088 | -1.37 | 0.163 | -1.19 | 0.396 | -1.28 |
| 1445695_at   | Atxn1             | Ataxin 1                                                                              | -1.1  | 0.723 | -1.13 | 0.344 | -1.71 | 0.017 | -1.25 | 0.364 | -1.3  |
| 1460085_at   | Zfp281            | Zinc finger protein 281                                                               | -1.73 | 0.049 | -1.14 | 0.418 | -1.08 | 0.462 | -1.3  | 0.224 | -1.31 |
| 1440051_at   | Ppp3ca            | Protein phosphatase 3, catalytic subunit, alpha isoform                               | -1.1  | 0.783 | -1.06 | 0.791 | -1.91 | 0.004 | -1.87 | 0.186 | -1.49 |
| 1457598_at   | Txn12             | Thioredoxin-like 2                                                                    | -1.09 | 0.665 | -1.75 | 0.099 | -1.13 | 0.678 | -1.16 | 0.317 | -1.28 |
| 1440853_at   | Rhot1             | ras homolog gene family, member T1                                                    | -1.12 | 0.829 | -1.61 | 0.046 | -1.16 | 0.239 | -1.06 | 0.82  | -1.24 |
| 1435074_at   | Tmem106b          | transmembrane protein 106B                                                            | -1.23 | 0.294 | -1.24 | 0.106 | -1.31 | 0.231 | -1.6  | 0.238 | -1.35 |
| 1446304_at   | ---               | ---                                                                                   | -1.25 | 0.294 | -1.18 | 0.409 | -1.37 | 0.273 | -1.17 | 0.588 | -1.24 |
| 1443719_x_at | Ddx42             | DEAD (Asp-Glu-Ala-Asp) box polypeptide 42                                             | -1.06 | 0.68  | -1.22 | 0.302 | -1.63 | 0.038 | -1.2  | 0.169 | -1.28 |
| 1434584_a_at | Pramel5 /// LOC38 | preferentially expressed antigen in melanoma like 5 /// Unknown (protein for IMA)     | -1.34 | 0.685 | -1.4  | 0.397 | -1.1  | 0.73  | -2.5  | 0.094 | -1.58 |
| 1455322_at   | Ttc21b            | tetratricopeptide repeat domain 21B                                                   | -1.34 | 0.187 | -1.27 | 0.14  | -1.19 | 0.226 | -1.2  | 0.326 | -1.25 |
| 1433766_at   | C330023M02Rik     | RIKEN cDNA C330023M02 gene                                                            | -1.22 | 0.242 | -1.26 | 0.017 | -1.31 | 0.009 | -1.15 | 0.011 | -1.24 |
| 1451058_at   | Mcts2             | malignant T cell amplified sequence 2                                                 | -1.16 | 0.104 | -1.17 | 0.112 | -1.52 | 0.023 | -1.34 | 0.062 | -1.3  |
| 1447002_at   | ---               | ---                                                                                   | -1.75 | 0.618 | -1.23 | 0.666 | -1.01 | 0.991 | -1.12 | 0.79  | -1.28 |
| 1452899_at   | Rian              | RNA imprinted and accumulated in nucleus                                              | -1.26 | 0.398 | -1.02 | 0.925 | -1.65 | 0.329 | -1.11 | 0.882 | -1.26 |
| 1435218_at   | Rasgef1a          | RasGEF domain family, member 1A                                                       | -1.39 | 0.513 | -1.05 | 0.776 | -1.42 | 0.125 | -1.53 | 0.192 | -1.35 |
| 1418623_at   | Rab2              | RAB2, member RAS oncogene family                                                      | -1.44 | 0.194 | -1.38 | 0.457 | -1.04 | 0.837 | -1.64 | 0.221 | -1.38 |
| 1458994_at   | Csnk1g3           | Casein kinase 1, gamma 3                                                              | -1.16 | 0.101 | -1.13 | 0.487 | -1.58 | 0.016 | -1.98 | 0.089 | -1.46 |
| 1423278_at   | Ptprk             | protein tyrosine phosphatase, receptor type, K                                        | -1.16 | 0.27  | -1.09 | 0.226 | -1.66 | 0.016 | -1.27 | 0.153 | -1.3  |
| 1429996_at   | 6330417A16Rik     | RIKEN cDNA 6330417A16 gene                                                            | -1.14 | 0.405 | -1.27 | 0.184 | -1.4  | 0.179 | -1.26 | 0.299 | -1.27 |
| 1453270_a_at | Phf14             | PHD finger protein 14                                                                 | -1.08 | 0.881 | -1.35 | 0.413 | -1.4  | 0.22  | -1.37 | 0.271 | -1.3  |
| 1442823_at   | ---               | 0 day neonate eyeball cDNA, RIKEN full-length enriched library, clone:E130001F        | -1.04 | 0.588 | -1.8  | 0.203 | -1.16 | 0.515 | -1.29 | 0.711 | -1.32 |
| 1437264_at   | BC051142          | cDNA sequence BC051142                                                                | -1.81 | 0.44  | -1.06 | 0.893 | -1.13 | 0.468 | -1.12 | 0.721 | -1.28 |
| 1457064_at   | D030002E05Rik     | RIKEN cDNA D030002E05 gene                                                            | -1.08 | 0.867 | -1.36 | 0.315 | -1.39 | 0.126 | -1.59 | 0.061 | -1.36 |
| 1429518_at   | Faim2             | Fas apoptotic inhibitory molecule 2                                                   | -1.43 | 0.226 | -1.37 | 0.117 | -1.05 | 0.861 | -1.02 | 0.955 | -1.22 |
| 1435300_at   | ---               | ---                                                                                   | -1.45 | 0.021 | -1.36 | 0.142 | -1.05 | 0.78  | -1.78 | 0.009 | -1.41 |
| 1456913_at   | Tmod3             | Tropomodulin 3                                                                        | -1.09 | 0.776 | -1.18 | 0.373 | -1.63 | 0.02  | -1.59 | 0.132 | -1.37 |
| 1437227_at   | 2900073H19Rik     | RIKEN cDNA 2900073H19 gene                                                            | -1.12 | 0.749 | -1.73 | 0.01  | -1.1  | 0.797 | -1.9  | 0.222 | -1.46 |
| 1446608_at   | Cbl               | Casitas B-lineage lymphoma                                                            | -1.46 | 0.063 | -1.28 | 0.506 | -1.09 | 0.765 | -1.12 | 0.714 | -1.24 |
| 1421569_at   | Grid1             | glutamate receptor, ionotropic, delta 1                                               | -1.32 | 0.586 | -1.23 | 0.734 | -1.24 | 0.618 | -1.25 | 0.198 | -1.26 |
| 1424664_at   | BC017647          | cDNA sequence BC017647                                                                | -1.6  | 0.179 | -1.27 | 0.415 | -1.03 | 0.899 | -1.19 | 0.784 | -1.27 |
| 1443338_at   | Ap2m1             | Adaptor protein complex AP-2, mu1                                                     | -1.06 | 0.826 | -1.27 | 0.118 | -1.54 | 0.027 | -1.19 | 0.029 | -1.26 |
| 1424377_at   | LOC670726         | similar to ribosomal protein L24-like                                                 | -1.14 | 0.17  | -1.39 | 0.061 | -1.28 | 0.128 | -1.01 | 0.885 | -1.2  |
| 1440167_s_at | Lpp               | LIM domain containing preferred translocation partner in lipoma                       | -1.05 | 0.558 | -1.18 | 0.396 | -1.72 | 0.03  | -1.33 | 0.37  | -1.32 |
| 1435788_at   | 2900086B20Rik     | RIKEN cDNA 2900086B20 gene                                                            | -1.13 | 0.035 | -1.33 | 0.135 | -1.34 | 0.129 | -1.13 | 0.394 | -1.23 |
| 1444371_at   | A630007B06Rik     | RIKEN cDNA A630007B06 gene                                                            | -1.11 | 0.564 | -1.22 | 0.558 | -1.51 | 0.07  | -1.54 | 0.017 | -1.35 |
| 1457051_at   | Trim27            | tripartite motif protein 27                                                           | -1.43 | 0.539 | -1.25 | 0.268 | -1.13 | 0.68  | -1.17 | 0.476 | -1.25 |
| 1456952_at   | Arid1b            | AT rich interactive domain 1B (Swi1 like)                                             | -1.2  | 0.38  | -1.14 | 0.255 | -1.49 | 0.071 | -1.79 | 0.042 | -1.4  |
| 1432665_at   | 2210416J07Rik     | RIKEN cDNA 2210416J07 gene                                                            | -1.28 | 0.34  | -1.26 | 0.748 | -1.24 | 0.3   | -1.04 | 0.779 | -1.21 |
| 1423637_at   | Galnt4            | UDP-N-acetyl-alpha-D-galactosamine:polypeptide N-acetylgalactosaminyltransferase      | -1.32 | 0.267 | -1.14 | 0.766 | -1.35 | 0.253 | -1.7  | 0.024 | -1.37 |
| 1452041_at   | Klhl26            | kelch-like 26 (Drosophila)                                                            | -1.44 | 0.201 | -1.25 | 0.058 | -1.13 | 0.58  | -1.45 | 0.01  | -1.32 |
| 1455617_at   | Lmbrd1            | LMBR1 domain containing 1                                                             | -1.13 | 0.143 | -1.33 | 0.254 | -1.34 | 0.204 | -1.41 | 0.02  | -1.3  |
| 1453790_at   | 5730403B10Rik     | RIKEN cDNA 5730403B10 gene                                                            | -1.03 | 0.899 | -1.86 | 0.012 | -1.15 | 0.541 | -1.32 | 0.441 | -1.34 |
| 1439769_at   | Zfp644            | Zinc finger protein 644                                                               | -1.02 | 0.925 | -1.69 | 0.162 | -1.23 | 0.139 | -1.09 | 0.565 | -1.26 |
| 1432536_at   | 1700055M20Rik     | RIKEN cDNA 1700055M20 gene                                                            | -1.43 | 0.682 | -1.04 | 0.947 | -1.39 | 0.292 | -1.06 | 0.75  | -1.23 |
| 1453106_a_at | Rnmt              | RNA (guanine-7-) methyltransferase                                                    | -1.26 | 0.091 | -1.16 | 0.149 | -1.36 | 0.025 | -1.01 | 0.954 | -1.2  |
| 1425895_a_at | Id1               | inhibitor of DNA binding 1                                                            | -1.87 | 0.317 | -1.11 | 0.837 | -1.06 | 0.777 | -1.51 | 0.082 | -1.39 |
| 1455115_a_at | Crb3              | crumbs homolog 3 (Drosophila)                                                         | -1.22 | 0.51  | -1.16 | 0.736 | -1.41 | 0.149 | -1.88 | 0.414 | -1.42 |
| 1439221_s_at | Cd40              | CD40 antigen                                                                          | -1.27 | 0.628 | -1.03 | 0.948 | -1.6  | 0.006 | -2.76 | 0.147 | -1.66 |
| 1448773_at   | Rpl11 /// LOC1941 | ribosomal protein L11 /// similar to 60S ribosomal protein L11 /// similar to 60S rib | -1.39 | 0.325 | -1.14 | 0.314 | -1.26 | 0.334 | -1.22 | 0.201 | -1.25 |

|              |                    |                                                                                        |       |       |       |       |       |       |       |       |       |
|--------------|--------------------|----------------------------------------------------------------------------------------|-------|-------|-------|-------|-------|-------|-------|-------|-------|
| 1418749_at   | Psd3               | pleckstrin and Sec7 domain containing 3                                                | -1.08 | 0.48  | -1.2  | 0.12  | -1.6  | 0.016 | -1.08 | 0.659 | -1.24 |
| 1439583_x_at | D130029J02Rik      | RIKEN cDNA D130029J02 gene                                                             | -1.55 | 0.32  | -1.02 | 0.863 | -1.32 | 0.045 | -1.78 | 0.011 | -1.42 |
| 1443148_at   | Hip2               | huntingtin interacting protein 2                                                       | -1.2  | 0.518 | -1.09 | 0.505 | -1.58 | 0.061 | -1.55 | 0.031 | -1.36 |
| 1450809_at   | Sval2              | seminal vesicle antigen-like 2                                                         | -1.64 | 0.413 | -1.11 | 0.839 | -1.14 | 0.844 | -1.05 | 0.953 | -1.24 |
| 1440013_at   | Trim44             | Tripartite motif-containing 44                                                         | -1.06 | 0.437 | -1.09 | 0.522 | -1.91 | 0.004 | -1.27 | 0.256 | -1.33 |
| 1439010_at   | D330037H05Rik ///  | RIKEN cDNA D330037H05 gene /// similar to La-related protein 4 (La ribonucleoprotein)  | -1.18 | 0.06  | -1.17 | 0.156 | -1.46 | 0.07  | -1.04 | 0.659 | -1.21 |
| 1453286_at   | Plxna2             | plexin A2                                                                              | -1.09 | 0.75  | -1.27 | 0.3   | -1.49 | 0.161 | -1.03 | 0.879 | -1.22 |
| 1458556_at   | Tnrc6c             | Trinucleotide repeat containing 6C                                                     | -1.01 | 0.938 | -1.31 | 0.477 | -1.6  | 0.17  | -2.11 | 0.297 | -1.51 |
| 1458023_at   | DXEtd697e          | DNA segment, Chr X, ERATO Doi 697, expressed                                           | -1.19 | 0.121 | -1.15 | 0.627 | -1.47 | 0.035 | -1.53 | 0.033 | -1.34 |
| 1423342_at   | Barx1              | BarH-like homeobox 1                                                                   | -1.59 | 0.064 | -1.23 | 0.371 | -1.06 | 0.796 | -2.6  | 0.002 | -1.62 |
| 1418116_at   | lfrg15             | interferon alpha responsive gene                                                       | -1.14 | 0.502 | -1.34 | 0.103 | -1.32 | 0.03  | -1.08 | 0.533 | -1.22 |
| 1442415_at   | 5830454E08Rik      | RIKEN cDNA 5830454E08 gene                                                             | -1.01 | 0.973 | -1.91 | 0.019 | -1.16 | 0.408 | -1.38 | 0.269 | -1.36 |
| 1434954_at   | ---                | ---                                                                                    | -1.17 | 0.717 | -1.14 | 0.365 | -1.53 | 0.134 | -1.18 | 0.312 | -1.26 |
| 1456430_at   | Ccdc39             | coiled-coil domain containing 39                                                       | -1.15 | 0.266 | -1.08 | 0.699 | -1.7  | 0.125 | -1.37 | 0.152 | -1.33 |
| 1416483_at   | Ttc3               | tetratricopeptide repeat domain 3                                                      | -1.17 | 0.252 | -1.09 | 0.4   | -1.64 | 0.098 | -1.6  | 0.101 | -1.37 |
| 1445199_at   | ---                | Transcribed locus                                                                      | -1.68 | 0.439 | -1.13 | 0.814 | -1.11 | 0.598 | -1.03 | 0.902 | -1.24 |
| 1436145_at   | Igf2bp3            | Insulin-like growth factor 2, binding protein 3                                        | -1.11 | 0.55  | -1.2  | 0.308 | -1.54 | 0.055 | -1.23 | 0.493 | -1.27 |
| 1435321_at   | 3732412D22Rik      | RIKEN cDNA 3732412D22 gene                                                             | -1.14 | 0.199 | -1.31 | 0.463 | -1.34 | 0.153 | -1.67 | 0.065 | -1.37 |
| 1460151_at   | ---                | ---                                                                                    | -1.04 | 0.912 | -1.2  | 0.331 | -1.68 | 0.066 | -1.21 | 0.081 | -1.29 |
| 1422692_at   | Sub1               | SUB1 homolog (S. cerevisia                                                             | -1.12 | 0.136 | -1.4  | 0.003 | -1.29 | 0.114 | -1.16 | 0.609 | -1.24 |
| 1451552_at   | MGC28431           | Similar to lipoyltransferase                                                           | -1.28 | 0.071 | -1.3  | 0.048 | -1.2  | 0.295 | -1.18 | 0.32  | -1.24 |
| 1419977_s_at | Rbm35b             | RNA binding motif protein 35b                                                          | -1.45 | 0.107 | -1.01 | 0.959 | -1.42 | 0.12  | -1.17 | 0.217 | -1.26 |
| 1455014_at   | AV009015           | expressed sequence AV009015                                                            | -1.21 | 0.157 | -1.12 | 0.067 | -1.5  | 0.013 | -1.28 | 0.103 | -1.28 |
| 1442660_at   | Ypel1              | Yippee-like 1 (Drosophila)                                                             | -1.12 | 0.61  | -1.39 | 0.065 | -1.29 | 0.359 | -1.29 | 0.306 | -1.27 |
| 1441324_at   | Zfp395             | Zinc finger protein 395                                                                | -1.24 | 0.642 | -1.28 | 0.408 | -1.25 | 0.436 | -1.4  | 0.287 | -1.29 |
| 1450657_at   | Ppie               | peptidylprolyl isomerase E (cyclophilin E)                                             | -1.25 | 0.404 | -1    | 0.969 | -1.7  | 0.156 | -1.19 | 0.163 | -1.28 |
| 1439467_at   | Mtap4              | Microtubule-associated protein 4                                                       | -1.11 | 0.651 | -1.09 | 0.117 | -1.77 | 0.022 | -1.49 | 0.133 | -1.36 |
| 1430064_at   | 4933424A20Rik      | RIKEN cDNA 4933424A20 gene                                                             | -1.23 | 0.328 | -1.73 | 0.294 | -1    | 0.988 | -1.2  | 0.201 | -1.29 |
| 1439276_at   | ---                | ---                                                                                    | -1.47 | 0.061 | -1.3  | 0.241 | -1.07 | 0.84  | -1.5  | 0.092 | -1.33 |
| 1427849_a_at | Tcrb-V13           | T-cell receptor beta, variable 13                                                      | -1.07 | 0.923 | -1.23 | 0.604 | -1.58 | 0.41  | -2.15 | 0.041 | -1.5  |
| 1439447_x_at | Rpl37a /// LOC6295 | ribosomal protein L37a /// similar to 60S ribosomal protein L37a /// similar to 60S    | -1.53 | 0.126 | -1.04 | 0.778 | -1.3  | 0.315 | -1.47 | 0.131 | -1.33 |
| 1423873_at   | Lsm1               | LSM1 homolog, U6 small nuclear RNA associated (S. cerevisiae)                          | -1.12 | 0.085 | -1.05 | 0.716 | -1.86 | 0.024 | -1.49 | 0.072 | -1.38 |
| 1429215_at   | 2310058N22Rik      | RIKEN cDNA 2310058N22 gene                                                             | -1.15 | 0.649 | -1.15 | 0.489 | -1.54 | 0.018 | -1.12 | 0.664 | -1.24 |
| 1440650_at   | Slit2              | Slit homolog 2 (Drosophila)                                                            | -1.33 | 0.119 | -1.01 | 0.964 | -1.56 | 0.17  | -1.46 | 0.653 | -1.34 |
| 1419177_at   | Vps37a             | vacuolar protein sorting 37A (yeast)                                                   | -1.06 | 0.669 | -1.23 | 0.2   | -1.58 | 0.045 | -1.27 | 0.442 | -1.29 |
| 1446209_at   | Usp40              | ubiquitin specific peptidase 40                                                        | -1.26 | 0.047 | -1.02 | 0.727 | -1.63 | 0.008 | -1.53 | 0.149 | -1.36 |
| 1420295_x_at | Clcn5              | chloride channel 5                                                                     | -1.12 | 0.359 | -1.4  | 0.216 | -1.27 | 0.43  | -1.24 | 0.694 | -1.26 |
| 1444224_at   | Tnfaip8            | Tumor necrosis factor, alpha-induced protein 8                                         | -1.4  | 0.557 | -1.41 | 0.349 | -1.04 | 0.941 | -1.4  | 0.36  | -1.31 |
| 1437238_x_at | Nmd3               | NMD3 homolog (S. cerevisiae)                                                           | -1.11 | 0.402 | -1.41 | 0.079 | -1.29 | 0.129 | -1.45 | 0.031 | -1.31 |
| 1428658_at   | Pin4 /// LOC628161 | protein (peptidyl-prolyl cis/trans isomerase) NIMA-interacting, 4 (parvulin) /// simil | -1.1  | 0.423 | -1.16 | 0.154 | -1.63 | 0.006 | -1.04 | 0.808 | -1.23 |
| 1455146_at   | C230082I21Rik      | RIKEN cDNA C230082I21 gene                                                             | -1.3  | 0.17  | -1.11 | 0.725 | -1.39 | 0.107 | -1.93 | 0.281 | -1.43 |
| 1442258_at   | ---                | ---                                                                                    | -1.1  | 0.621 | -1.65 | 0     | -1.15 | 0.468 | -1.49 | 0.111 | -1.34 |
| 1459063_at   | ---                | Transcribed locus                                                                      | -1.11 | 0.786 | -1.66 | 0.052 | -1.13 | 0.796 | -1    | 0.998 | -1.23 |
| 1429611_at   | 1700034E13Rik      | RIKEN cDNA 1700034E13 gene                                                             | -1.86 | 0.344 | -1.01 | 0.972 | -1.16 | 0.629 | -1.17 | 0.879 | -1.3  |
| 1453023_at   | Ankhd1             | ankyrin repeat and KH domain containing 1                                              | -1.22 | 0.518 | -1.26 | 0.589 | -1.28 | 0.064 | -1.2  | 0.222 | -1.24 |
| 1444818_at   | ---                | ---                                                                                    | -1.37 | 0.631 | -1.21 | 0.491 | -1.2  | 0.72  | -1.1  | 0.666 | -1.22 |
| 1454439_at   | 4833419G08Rik      | RIKEN cDNA 4833419G08 gene                                                             | -1.14 | 0.615 | -1.58 | 0.181 | -1.13 | 0.745 | -1.48 | 0.035 | -1.34 |
| 1445985_at   | Traf3ip2           | Traf3 interacting protein 2                                                            | -1.02 | 0.981 | -1.28 | 0.716 | -1.59 | 0.158 | -2.06 | 0.236 | -1.49 |
| 1440906_at   | Bcl7c              | B-cell CLL/lymphoma 7C                                                                 | -1.17 | 0.635 | -1.3  | 0.36  | -1.3  | 0.439 | -1.54 | 0.583 | -1.33 |
| 1432933_at   | 4930429N05Rik      | RIKEN cDNA 4930429N05 gene                                                             | -1.08 | 0.502 | -2.14 | 0.158 | -1.01 | 0.993 | -1.69 | 0.43  | -1.48 |
| 1447860_x_at | Cog8               | component of oligomeric golgi complex 8                                                | -1.06 | 0.696 | -1.25 | 0.169 | -1.55 | 0.146 | -1.91 | 0.173 | -1.44 |
| 1460548_a_at | Eral1              | Era (G-protein)-like 1 (E. coli)                                                       | -1.08 | 0.661 | -1.26 | 0.186 | -1.49 | 0.014 | -1.69 | 0.052 | -1.38 |
| 1454678_s_at | A130022J15Rik      | RIKEN cDNA A130022J15 gene                                                             | -1.15 | 0.099 | -1.34 | 0.047 | -1.29 | 0.118 | -1.15 | 0.571 | -1.23 |

|              |                     |                                                                                       |       |       |       |       |       |       |       |       |       |
|--------------|---------------------|---------------------------------------------------------------------------------------|-------|-------|-------|-------|-------|-------|-------|-------|-------|
| 1417984_at   | Ube2v2              | ubiquitin-conjugating enzyme E2 variant 2                                             | -1.34 | 0.326 | -1.34 | 0.109 | -1.11 | 0.319 | -1    | 0.982 | -1.2  |
| 1425087_at   | 2310003F16Rik       | RIKEN cDNA 2310003F16 gene                                                            | -1.22 | 0.58  | -1.71 | 0.164 | -1.01 | 0.962 | -1.32 | 0.267 | -1.32 |
| 1436515_at   | E030004N02Rik       | RIKEN cDNA E030004N02 gene                                                            | -1.21 | 0.017 | -1.33 | 0.485 | -1.23 | 0.428 | -2.55 | 0.085 | -1.58 |
| 1437647_at   | Dido1               | death inducer-obliator 1                                                              | -1.4  | 0.081 | -1.43 | 0.008 | -1.02 | 0.928 | -1.12 | 0.622 | -1.24 |
| 1445513_at   | Vezt                | Vezatin, adherens junctions transmembrane protein                                     | -1.21 | 0.519 | -1.62 | 0.027 | -1.05 | 0.671 | -1.15 | 0.802 | -1.26 |
| 1430216_at   | Zfp292              | zinc finger protein 292                                                               | -1.42 | 0.374 | -1.26 | 0.561 | -1.12 | 0.628 | -1.53 | 0.387 | -1.33 |
| 1453109_at   | Arsk                | arylsulfatase K                                                                       | -1.33 | 0.105 | -1.12 | 0.187 | -1.34 | 0.122 | -1.15 | 0.412 | -1.24 |
| 1423592_at   | Rock2               | Rho-associated coiled-coil containing protein kinase 2                                | -1.12 | 0.465 | -1.13 | 0.565 | -1.63 | 0.105 | -1.3  | 0.352 | -1.3  |
| 1429264_at   | C030044B11Rik       | RIKEN cDNA C030044B11 gene                                                            | -1.04 | 0.182 | -1.36 | 0.109 | -1.44 | 0.088 | -1.12 | 0.383 | -1.24 |
| 1445211_at   | ---                 | PREDICTED: Mus musculus hypothetical protein LOC626411 (LOC626411), mR                | -1.19 | 0.438 | -1.38 | 0.08  | -1.2  | 0.401 | -1.52 | 0.026 | -1.32 |
| 1422074_at   | Cdx2                | caudal type homeo box 2                                                               | -1.03 | 0.957 | -1.25 | 0.326 | -1.61 | 0.015 | -1.17 | 0.522 | -1.27 |
| 1423666_s_at | Rpl5 /// LOC38274   | ribosomal protein L5 /// similar to 60S ribosomal protein L5 /// similar to 60S ribos | -1.03 | 0.783 | -1.17 | 0.216 | -1.75 | 0.015 | -1.15 | 0.322 | -1.28 |
| 1446615_at   | ---                 | ---                                                                                   | -1.25 | 0.208 | -1.17 | 0.704 | -1.36 | 0.141 | -1.51 | 0.153 | -1.32 |
| 1445585_at   | Zfp313              | zinc finger protein 313                                                               | -1.19 | 0.259 | -1.23 | 0.609 | -1.35 | 0.721 | -1.2  | 0.765 | -1.24 |
| 1440658_at   | E230022H04Rik       | RIKEN cDNA E230022H04 gene                                                            | -1.02 | 0.96  | -1.25 | 0.454 | -1.62 | 0.131 | -1.28 | 0.45  | -1.29 |
| 1444432_at   | D330040H18Rik       | RIKEN cDNA D330040H18 gene                                                            | -1.16 | 0.654 | -1.03 | 0.872 | -1.77 | 0.005 | -1.44 | 0.363 | -1.35 |
| 1439097_at   | D10Wsu52e           | DNA segment, Chr 10, Wayne State University 52, expressed                             | -1.23 | 0.219 | -1.31 | 0.152 | -1.23 | 0.435 | -1.8  | 0.064 | -1.39 |
| 1460272_at   | Ubl4b               | ubiquitin-like 4B                                                                     | -1.71 | 0.134 | -1.17 | 0.142 | -1.05 | 0.827 | -1.14 | 0.541 | -1.27 |
| 1428373_at   | lhpk2               | inositol hexaphosphate kinase 2                                                       | -1.42 | 0.199 | -1.14 | 0.554 | -1.23 | 0.281 | -1.69 | 0.186 | -1.37 |
| 1444021_at   | ---                 | ---                                                                                   | -1.23 | 0.513 | -1.33 | 0.617 | -1.2  | 0.115 | -1.35 | 0.285 | -1.28 |
| 1434029_at   | 2410025L10Rik       | RIKEN cDNA 2410025L10 gene                                                            | -1.08 | 0.459 | -1.51 | 0.083 | -1.24 | 0.423 | -1.01 | 0.959 | -1.21 |
| 1429874_at   | Spata17             | spermatogenesis associated 17                                                         | -1.18 | 0.777 | -1.7  | 0.149 | -1.05 | 0.583 | -1.93 | 0.1   | -1.46 |
| 1424813_at   | AA536717            | expressed sequence AA536717                                                           | -1.24 | 0.208 | -1.24 | 0.02  | -1.28 | 0.138 | -1.16 | 0.273 | -1.23 |
| 1446955_at   | Nr2c2               | Nuclear receptor subfamily 2, group C, member 2                                       | -1.1  | 0.652 | -1.3  | 0.024 | -1.39 | 0.244 | -1.04 | 0.86  | -1.21 |
| 1424861_at   | D930016D06Rik       | RIKEN cDNA D930016D06 gene                                                            | -1.11 | 0.622 | -1.14 | 0.153 | -1.62 | 0.002 | -1.45 | 0.028 | -1.33 |
| 1439398_x_at | Nelf                | nasal embryonic LHRH factor                                                           | -1.4  | 0.329 | -1.23 | 0.088 | -1.15 | 0.385 | -1.31 | 0.163 | -1.27 |
| 1427057_at   | C630002B14Rik       | RIKEN cDNA C630002B14 gene                                                            | -1.57 | 0.301 | -1.25 | 0.014 | -1.05 | 0.611 | -1.1  | 0.629 | -1.24 |
| 1438065_at   | ---                 | ---                                                                                   | -1.43 | 0.251 | -1.21 | 0.438 | -1.15 | 0.535 | -1.17 | 0.455 | -1.24 |
| 1435109_at   | 0710007G10Rik ///   | RIKEN cDNA 0710007G10 gene /// RIKEN cDNA 3010001K23 gene                             | -1.14 | 0.411 | -1.25 | 0.317 | -1.39 | 0.122 | -1.27 | 0.154 | -1.26 |
| 1436263_at   | Mobp                | myelin-associated oligodendrocytic basic protein                                      | -1.85 | 0.009 | -1.09 | 0.68  | -1.07 | 0.817 | -1.62 | 0.045 | -1.41 |
| 1460408_at   | Gabrg1              | gamma-aminobutyric acid (GABA-A) receptor, subunit gamma 1                            | -1.37 | 0.627 | -1.26 | 0.739 | -1.15 | 0.739 | -1    | 0.995 | -1.2  |
| 1433409_at   | C030014O09Rik       | RIKEN cDNA C030014O09 gene                                                            | -1.15 | 0.415 | -1.35 | 0.184 | -1.27 | 0.01  | -1.34 | 0.512 | -1.28 |
| 1451195_a_at | Txndc1              | thioredoxin domain containing 1                                                       | -1.94 | 0.368 | -1.1  | 0.831 | -1.03 | 0.937 | -1.13 | 0.76  | -1.3  |
| 1446033_at   | C87882              | expressed sequence C87882                                                             | -1.21 | 0.754 | -1.09 | 0.847 | -1.52 | 0.202 | -1.56 | 0.227 | -1.35 |
| 1451360_at   | Ergic2              | ERGIC and golgi 2                                                                     | -1.21 | 0.091 | -1.09 | 0.404 | -1.53 | 0.007 | -1.14 | 0.447 | -1.24 |
| 1440994_at   | Shprh               | SNF2 histone linker PHD RING helicase                                                 | -1.35 | 0.184 | -1.26 | 0.254 | -1.16 | 0.303 | -1.19 | 0.388 | -1.24 |
| 1450232_at   | Birc4               | baculoviral IAP repeat-containing 4                                                   | -1.07 | 0.854 | -1.28 | 0.067 | -1.47 | 0.091 | -1.11 | 0.687 | -1.23 |
| 1432011_at   | 2900052L18Rik       | RIKEN cDNA 2900052L18 gene                                                            | -1.16 | 0.257 | -1.34 | 0.103 | -1.26 | 0.332 | -1.82 | 0.023 | -1.4  |
| 1431823_at   | Moap1               | modulator of apoptosis 1                                                              | -1.17 | 0.099 | -1.39 | 0.153 | -1.21 | 0.067 | -1.33 | 0.053 | -1.28 |
| 1458490_at   | 9230116N13Rik       | RIKEN cDNA 9230116N13 gene                                                            | -1.09 | 0.798 | -1.38 | 0.175 | -1.33 | 0.177 | -1.42 | 0.243 | -1.31 |
| 1447322_at   | ---                 | ---                                                                                   | -1.11 | 0.561 | -1.13 | 0.58  | -1.64 | 0.019 | -1.39 | 0.132 | -1.32 |
| 1436217_at   | Zfp148              | zinc finger protein 148                                                               | -1.15 | 0.041 | -1.08 | 0.547 | -1.67 | 0.079 | -1.32 | 0.08  | -1.3  |
| 1444271_at   | Anapc1              | anaphase promoting complex subunit 1                                                  | -1.02 | 0.929 | -1.21 | 0.575 | -1.68 | 0.068 | -1.28 | 0.297 | -1.3  |
| 1431158_at   | 8430406H22Rik       | RIKEN cDNA 8430406H22 gene                                                            | -1.04 | 0.94  | -1.31 | 0.213 | -1.49 | 0.018 | -1    | 0.991 | -1.21 |
| 1443039_at   | ---                 | ---                                                                                   | -1.14 | 0.812 | -1.05 | 0.924 | -1.77 | 0.337 | -4.09 | 0.03  | -2.01 |
| 1430077_at   | Sfrs11              | splicing factor, arginine/serine-rich 11                                              | -1.24 | 0.343 | -1.17 | 0.09  | -1.36 | 0.115 | -1.18 | 0.555 | -1.24 |
| 1443798_at   | Pik3cd              | phosphatidylinositol 3-kinase catalytic delta polypeptide                             | -1.61 | 0.095 | -1.03 | 0.794 | -1.24 | 0.358 | -1.02 | 0.902 | -1.23 |
| 1426359_at   | Zc3h11a             | zinc finger CCH type containing 11A                                                   | -1.06 | 0.552 | -1.33 | 0.132 | -1.41 | 0.067 | -1.31 | 0.071 | -1.28 |
| 1440062_at   | 2510009E07Rik       | RIKEN cDNA 2510009E07 gene                                                            | -1.53 | 0.568 | -1.07 | 0.902 | -1.23 | 0.584 | -1.4  | 0.248 | -1.31 |
| 1455605_at   | Rufy3               | RUN and FYVE domain containing 3                                                      | -1.2  | 0.04  | -1.15 | 0.209 | -1.44 | 0.007 | -1.7  | 0.031 | -1.37 |
| 1453951_a_at | D19Erttd652e /// LO | DNA segment, Chr 19, ERATO Doi 652, expressed /// similar to DNA segment, C           | -1.02 | 0.972 | -1.68 | 0.031 | -1.21 | 0.537 | -1.3  | 0.322 | -1.31 |
| 1457161_at   | 9530029O12Rik       | RIKEN cDNA 9530029O12 gene                                                            | -1.02 | 0.904 | -1.22 | 0.143 | -1.69 | 0.005 | -1.16 | 0.373 | -1.27 |
| 1447486_at   | Ppp1r9b             | protein phosphatase 1, regulatory subunit 9B                                          | -1.48 | 0.131 | -1.03 | 0.931 | -1.33 | 0.161 | -1.05 | 0.875 | -1.22 |

|              |                   |                                                                                |       |       |       |       |       |       |       |       |       |
|--------------|-------------------|--------------------------------------------------------------------------------|-------|-------|-------|-------|-------|-------|-------|-------|-------|
| 1452042_a_at | Tmem144           | transmembrane protein 144                                                      | -1.25 | 0.324 | -1.32 | 0.373 | -1.19 | 0.243 | -1.17 | 0.776 | -1.23 |
| 1457480_at   | Pcgf3             | Polycomb group ring finger 3                                                   | -1.03 | 0.911 | -1.32 | 0.083 | -1.49 | 0.041 | -1.22 | 0.336 | -1.27 |
| 1444465_at   | Ube4b             | Ubiquitination factor E4B, UFD2 homolog (S. cerevisiae)                        | -1.11 | 0.828 | -1.45 | 0.531 | -1.24 | 0.491 | -1.63 | 0.163 | -1.36 |
| 1437392_at   | LOC433485         | hypothetical LOC433485                                                         | -1.95 | 0.332 | -1.07 | 0.892 | -1.05 | 0.944 | -1.09 | 0.742 | -1.29 |
| 1419672_at   | Spock1            | sparc/osteonectin, cwcv and kazal-like domains proteoglycan 1                  | -1.1  | 0.742 | -1.19 | 0.599 | -1.53 | 0.38  | -1.74 | 0.271 | -1.39 |
| 1446242_at   | 4930535B03Rik     | RIKEN cDNA 4930535B03 gene                                                     | -1.33 | 0.051 | -1.25 | 0.516 | -1.18 | 0.589 | -1.13 | 0.68  | -1.22 |
| 1443856_at   | ---               | ---                                                                            | -1.12 | 0.123 | -1.22 | 0.059 | -1.46 | 0.191 | -1.3  | 0.306 | -1.27 |
| 1418684_at   | 2310012P17Rik     | RIKEN cDNA 2310012P17 gene                                                     | -1.34 | 0.23  | -1.15 | 0.497 | -1.27 | 0.329 | -1.09 | 0.672 | -1.21 |
| 1439392_x_at | Psmc1 /// LOC386C | protease (prosome, macropain) 26S subunit, ATPase 1 /// hypothetical gene supp | -1.51 | 0.336 | -1.02 | 0.917 | -1.33 | 0.668 | -2.29 | 0.055 | -1.54 |
| 1455728_at   | Pten              | phosphatase and tensin homolog                                                 | -1.25 | 0.069 | -1.14 | 0.143 | -1.39 | 0.135 | -1.56 | 0.122 | -1.33 |
| 1459483_at   | Tmem28            | Transmembrane protein 28                                                       | -1.39 | 0.426 | -1.01 | 0.985 | -1.46 | 0.072 | -1    | 0.928 | -1.21 |
| 1421897_at   | Elk1              | ELK1, member of ETS oncogene family                                            | -2.09 | 0.134 | -1.02 | 0.956 | -1.06 | 0.85  | -1.17 | 0.528 | -1.34 |
| 1457956_at   | 2310058O09Rik     | RIKEN cDNA 2310058O09 gene                                                     | -1.67 | 0.148 | -1.23 | 0.663 | -1.01 | 0.98  | -1.42 | 0.257 | -1.33 |
| 1430219_at   | Fts               | fused toes                                                                     | -1.78 | 0.33  | -1.16 | 0.864 | -1.03 | 0.961 | -1.32 | 0.743 | -1.32 |
| 1459362_at   | ---               | Transcribed locus                                                              | -1.67 | 0.316 | -1.03 | 0.957 | -1.2  | 0.608 | -2.09 | 0.088 | -1.5  |
| 1451776_s_at | Hod               | homeobox only domain                                                           | -1.2  | 0.385 | -1.29 | 0.306 | -1.27 | 0.186 | -1.15 | 0.687 | -1.22 |
| 1445909_at   | ---               | ---                                                                            | -1.03 | 0.885 | -1.8  | 0.133 | -1.14 | 0.323 | -1.03 | 0.965 | -1.25 |
| 1459098_at   | Dst               | Dystonin                                                                       | -1.21 | 0.601 | -1.2  | 0.439 | -1.35 | 0.227 | -1    | 0.994 | -1.19 |
| 1445290_at   | Hunk              | Hormonally upregulated Neu-associated kinase                                   | -1.54 | 0.554 | -1.1  | 0.88  | -1.18 | 0.63  | -1.62 | 0.296 | -1.36 |
| 1448049_at   | Jmjd1c            | jumonji domain containing 1C                                                   | -1.15 | 0.377 | -1.2  | 0.233 | -1.43 | 0.08  | -1.7  | 0.07  | -1.37 |
| 1440590_at   | ---               | ---                                                                            | -1.07 | 0.736 | -1.16 | 0.678 | -1.66 | 0.033 | -1.07 | 0.723 | -1.24 |
| 1427322_at   | Brwd1             | bromodomain and WD repeat domain containing 1                                  | -1.24 | 0.502 | -1.27 | 0.306 | -1.23 | 0.299 | -2.12 | 0.194 | -1.47 |
| 1444096_at   | Zfr               | Zinc finger RNA binding protein                                                | -1.12 | 0.653 | -1.2  | 0.181 | -1.48 | 0.065 | -1.09 | 0.729 | -1.22 |
| 1443095_at   | ---               | ---                                                                            | -1.12 | 0.16  | -1.13 | 0.425 | -1.61 | 0.034 | -1.17 | 0.417 | -1.26 |
| 1441794_at   | 4933437K13Rik     | RIKEN cDNA 4933437K13 gene                                                     | -1.34 | 0.264 | -1.21 | 0.566 | -1.21 | 0.574 | -2.89 | 0.067 | -1.66 |
| 1445242_at   | Gyk               | glycerol kinase                                                                | -1.09 | 0.17  | -1.29 | 0.017 | -1.42 | 0.27  | -1.53 | 0.332 | -1.33 |
| 1460605_at   | Crxos1            | Crx opposite strand transcript 1                                               | -1.3  | 0.704 | -1.25 | 0.586 | -1.2  | 0.813 | -1.22 | 0.738 | -1.24 |
| 1419475_a_at | Ehf               | ets homologous factor                                                          | -1.03 | 0.882 | -2.17 | 0.251 | -1.03 | 0.9   | -1.07 | 0.824 | -1.33 |
| 1447908_x_at | Ttc3              | tetratricopeptide repeat domain 3                                              | -1.57 | 0.106 | -1.07 | 0.354 | -1.21 | 0.323 | -1.11 | 0.442 | -1.24 |
| 1424867_a_at | Glyat             | glycine-N-acyltransferase                                                      | -1.37 | 0.097 | -1.13 | 0.291 | -1.27 | 0.55  | -1.13 | 0.852 | -1.23 |
| 1456576_x_at | Cnot2             | CCR4-NOT transcription complex, subunit 2                                      | -1.14 | 0.477 | -1.18 | 0.226 | -1.47 | 0.09  | -1.54 | 0.123 | -1.33 |
| 1447092_at   | Pecam1            | Platelet/endothelial cell adhesion molecule 1                                  | -1.19 | 0.51  | -1.03 | 0.878 | -1.7  | 0.128 | -1.64 | 0.231 | -1.39 |
| 1433988_s_at | C230098O21Rik     | RIKEN cDNA C230098O21 gene                                                     | -1.29 | 0.032 | -1.32 | 0.147 | -1.15 | 0.424 | -1.62 | 0.023 | -1.34 |
| 1450190_at   | Zfp106            | zinc finger protein 106                                                        | -1.24 | 0.635 | -1.11 | 0.841 | -1.44 | 0.552 | -1.13 | 0.805 | -1.23 |
| 1442679_at   | Map2k4            | Mitogen activated protein kinase kinase 4                                      | -1.33 | 0.378 | -1.1  | 0.724 | -1.36 | 0.477 | -1.35 | 0.2   | -1.28 |
| 1456880_at   | Sfrs8             | Splicing factor, arginine/serine-rich 8                                        | -1.14 | 0.567 | -1.35 | 0.001 | -1.27 | 0.379 | -1.25 | 0.08  | -1.25 |
| 1419506_at   | Ggps1             | geranylgeranyl diphosphate synthase 1                                          | -1.02 | 0.88  | -1.38 | 0.029 | -1.44 | 0.02  | -1.29 | 0.212 | -1.28 |
| 1446709_at   | ---               | ---                                                                            | -1.3  | 0.712 | -1.13 | 0.614 | -1.34 | 0.469 | -1.14 | 0.828 | -1.23 |
| 1453036_at   | 5430439M09Rik     | RIKEN cDNA 5430439M09 gene                                                     | -1.31 | 0.268 | -1.2  | 0.426 | -1.24 | 0.077 | -1.12 | 0.526 | -1.22 |
| 1455035_s_at | Nol5a             | nucleolar protein 5A                                                           | -1.08 | 0.723 | -1.53 | 0.001 | -1.21 | 0.422 | -1.31 | 0.118 | -1.28 |
| 1434471_at   | BC003331          | cDNA sequence BC003331                                                         | -1.09 | 0.616 | -1.15 | 0.398 | -1.63 | 0.062 | -1.12 | 0.588 | -1.25 |
| 1456734_at   | Txn1              | thioredoxin 1                                                                  | -1.09 | 0.791 | -1.63 | 0.243 | -1.14 | 0.701 | -1.19 | 0.758 | -1.26 |
| 1432216_s_at | Mpp7              | membrane protein, palmitoylated 7 (MAGUK p55 subfamily member 7)               | -1.2  | 0.543 | -1.12 | 0.675 | -1.47 | 0.019 | -1.45 | 0.098 | -1.31 |
| 1448094_at   | LOC546100         | hypothetical LOC546100                                                         | -1.39 | 0.728 | -1.45 | 0.474 | -1    | 0.992 | -1.26 | 0.563 | -1.28 |
| 1428654_at   | 1200016B10Rik     | RIKEN cDNA 1200016B10 gene                                                     | -1.05 | 0.766 | -1.22 | 0.13  | -1.6  | 0.034 | -1    | 0.991 | -1.22 |
| 1436756_x_at | Hadhsc            | L-3-hydroxyacyl-Coenzyme A dehydrogenase, short chain                          | -1.85 | 0.05  | -1.05 | 0.847 | -1.09 | 0.531 | -2.34 | 0.153 | -1.58 |
| 1457188_at   | Arhgef11          | Rho guanine nucleotide exchange factor (GEF) 11                                | -1.24 | 0.188 | -1.02 | 0.958 | -1.62 | 0.07  | -1.67 | 0.279 | -1.39 |
| 1437498_at   | ---               | ---                                                                            | -1.1  | 0.629 | -1.27 | 0.265 | -1.4  | 0.168 | -1.35 | 0.513 | -1.28 |
| 1459005_at   | D030051N19Rik     | RIKEN cDNA D030051N19 gene                                                     | -1.23 | 0.317 | -1.01 | 0.972 | -1.66 | 0.006 | -1.59 | 0.028 | -1.37 |
| 1455442_at   | Slc6a19           | solute carrier family 6 (neurotransmitter transporter), member 19              | -1.17 | 0.395 | -1.59 | 0.305 | -1.08 | 0.736 | -2.23 | 0.052 | -1.52 |
| 1424034_at   | Rora              | RAR-related orphan receptor alpha                                              | -1.1  | 0.683 | -1.25 | 0.041 | -1.44 | 0.146 | -1.61 | 0.128 | -1.35 |
| 1420543_at   | ORF28             | open reading frame 28                                                          | -1.23 | 0.217 | -1.13 | 0.506 | -1.4  | 0.138 | -1.05 | 0.701 | -1.21 |
| 1453311_at   | 2310008B10Rik     | RIKEN cDNA 2310008B10 gene                                                     | -1.21 | 0.246 | -1.22 | 0.524 | -1.31 | 0.311 | -1.64 | 0.177 | -1.35 |

|              |               |                                                                               |       |       |       |       |       |       |       |       |       |
|--------------|---------------|-------------------------------------------------------------------------------|-------|-------|-------|-------|-------|-------|-------|-------|-------|
| 1424811_at   | Cml5          | camello-like 5                                                                | -1.03 | 0.975 | -1.8  | 0.059 | -1.14 | 0.845 | -3.03 | 0.182 | -1.75 |
| 1442186_at   | Atxn7         | ataxin 7                                                                      | -1.17 | 0.486 | -1.08 | 0.779 | -1.62 | 0.131 | -1.26 | 0.258 | -1.28 |
| 1438072_at   | Nfib          | Nuclear factor I/B                                                            | -1.03 | 0.85  | -1.08 | 0.549 | -1.94 | 0.016 | -1.22 | 0.561 | -1.32 |
| 1423560_at   | Nell2         | NEL-like 2 (chicken)                                                          | -1.07 | 0.597 | -1.74 | 0.014 | -1.12 | 0.385 | -1.56 | 0.093 | -1.37 |
| 1430328_at   | Polr3f        | polymerase (RNA) III (DNA directed) polypeptide F                             | -1.09 | 0.339 | -1.42 | 0.239 | -1.28 | 0.22  | -1.13 | 0.707 | -1.23 |
| 1460645_at   | Chordc1       | cysteine and histidine-rich domain (CHORD)-containing, zinc-binding protein 1 | -1.06 | 0.742 | -1.32 | 0.176 | -1.41 | 0.012 | -1.29 | 0.279 | -1.27 |
| 1442569_at   | Cct4          | Chaperonin subunit 4 (delta)                                                  | -1.18 | 0.549 | -1.19 | 0.412 | -1.4  | 0.104 | -1.49 | 0.425 | -1.31 |
| 1417814_at   | Pla2g5        | phospholipase A2, group V                                                     | -1.14 | 0.566 | -1.31 | 0.701 | -1.31 | 0.549 | -2.2  | 0.088 | -1.49 |
| 1452984_at   | 5730405I09Rik | RIKEN cDNA 5730405I09 gene                                                    | -1.16 | 0.202 | -1.34 | 0.096 | -1.26 | 0.334 | -1.15 | 0.38  | -1.23 |
| 1442387_at   | Hars          | Histidyl-tRNA synthetase                                                      | -1.36 | 0.578 | -1.33 | 0.522 | -1.08 | 0.737 | -1.08 | 0.726 | -1.22 |
| 1444557_at   | Sumo1         | SMT3 suppressor of mif two 3 homolog 1 (yeast)                                | -1.17 | 0.119 | -1.06 | 0.763 | -1.64 | 0.027 | -1.36 | 0.032 | -1.31 |
| 1429041_at   | 2610005L07Rik | RIKEN cDNA 2610005L07 gene                                                    | -1.5  | 0.016 | -1.18 | 0.302 | -1.12 | 0.453 | -1.23 | 0.272 | -1.26 |
| 1457193_at   | MIl3          | myeloid/lymphoid or mixed-lineage leukemia 3                                  | -1.12 | 0.434 | -1.13 | 0.53  | -1.59 | 0.106 | -1.15 | 0.321 | -1.25 |
| 1432053_at   | Rfx4          | regulatory factor X, 4 (influences HLA class II expression)                   | -1.54 | 0.262 | -1.08 | 0.8   | -1.21 | 0.449 | -1    | 0.971 | -1.21 |
| 1445786_at   | Braf          | Braf transforming gene                                                        | -1.03 | 0.83  | -1.26 | 0.364 | -1.54 | 0.004 | -1.03 | 0.898 | -1.22 |
| 1426455_at   | Sdccag10      | serologically defined colon cancer antigen 10                                 | -1.15 | 0.338 | -1.48 | 0.189 | -1.17 | 0.427 | -1.35 | 0.188 | -1.29 |
| 1419473_a_at | Cck           | cholecystokinin                                                               | -1.12 | 0.356 | -1.66 | 0.37  | -1.09 | 0.501 | -2.74 | 0.078 | -1.65 |
| 1421426_at   | Hhip          | Hedgehog-interacting protein                                                  | -1.11 | 0.893 | -1.83 | 0.355 | -1.04 | 0.905 | -1.01 | 0.973 | -1.25 |
| 1445907_at   | ---           | ---                                                                           | -1.05 | 0.941 | -1.65 | 0.228 | -1.17 | 0.611 | -1.26 | 0.254 | -1.29 |
| 1437990_x_at | Hbb-bh1       | hemoglobin Z, beta-like embryonic chain                                       | -1.03 | 0.937 | -1.31 | 0.687 | -1.49 | 0.376 | -1.53 | 0.526 | -1.34 |
| 1416480_a_at | Higd1a        | HIG1 domain family, member 1A                                                 | -1.06 | 0.608 | -1.46 | 0.005 | -1.29 | 0.02  | -1.06 | 0.742 | -1.22 |
| 1431189_a_at | Fahd2a        | fumarylacetoacetate hydrolase domain containing 2A                            | -1.12 | 0.267 | -1.7  | 0.032 | -1.08 | 0.402 | -1.7  | 0.156 | -1.4  |
| 1429328_at   | Nsfl1c        | NSFL1 (p97) cofactor (p47)                                                    | -1.25 | 0.593 | -1.58 | 0.064 | -1.03 | 0.859 | -1.01 | 0.973 | -1.22 |
| 1459067_at   | 1190002N15Rik | RIKEN cDNA 1190002N15 gene                                                    | -1.1  | 0.603 | -1.3  | 0.45  | -1.37 | 0.691 | -2.76 | 0.02  | -1.63 |
| 1451693_a_at | Fgf12         | fibroblast growth factor 12                                                   | -1.62 | 0.349 | -1.08 | 0.783 | -1.16 | 0.326 | -1.75 | 0.448 | -1.4  |
| 1445034_at   | Coro2a        | Coronin, actin binding protein 2A                                             | -1.38 | 0.041 | -1    | 0.998 | -1.46 | 0.246 | -1.66 | 0.136 | -1.37 |
| 1458126_at   | D030041H20Rik | RIKEN cDNA D030041H20 gene                                                    | -1.02 | 0.927 | -1.14 | 0.585 | -1.82 | 0.124 | -1.29 | 0.415 | -1.32 |
| 1441296_at   | ---           | ---                                                                           | -1.33 | 0.471 | -1.33 | 0.172 | -1.1  | 0.85  | -1.19 | 0.433 | -1.24 |
| 1434394_at   | B3bp          | Bcl3 binding protein                                                          | -1.2  | 0.547 | -1.47 | 0.009 | -1.12 | 0.467 | -1.45 | 0.196 | -1.31 |
| 1429735_at   | 1110003F05Rik | RIKEN cDNA 1110003F05 gene                                                    | -1.06 | 0.236 | -1.1  | 0.013 | -1.8  | 0.003 | -1.06 | 0.131 | -1.25 |
| 1434002_at   | Ches1         | checkpoint suppressor 1                                                       | -1.14 | 0.228 | -1.2  | 0.136 | -1.44 | 0.052 | -1.51 | 0.129 | -1.32 |
| 1426224_x_at | Cmtm2a        | CKLF-like MARVEL transmembrane domain containing 2A                           | -1.51 | 0.41  | -1.29 | 0.592 | -1.03 | 0.96  | -1.02 | 0.975 | -1.21 |
| 1441905_x_at | Snrpn         | Small nuclear ribonucleoprotein N                                             | -1.34 | 0.312 | -1.46 | 0.571 | -1.02 | 0.967 | -1.96 | 0.229 | -1.45 |
| 1420490_at   | Klk1b16       | kallikrein 1-related peptidase b16                                            | -1.14 | 0.789 | -1.71 | 0.304 | -1.05 | 0.938 | -1.49 | 0.338 | -1.35 |
| 1427370_at   | Amdhd1        | amidohydrolase domain containing 1                                            | -1.31 | 0.526 | -1.15 | 0.202 | -1.29 | 0.541 | -1.6  | 0.548 | -1.34 |
| 1450395_at   | Slc22a5       | solute carrier family 22 (organic cation transporter), member 5               | -1.16 | 0.511 | -1.44 | 0.319 | -1.18 | 0.486 | -1.18 | 0.584 | -1.24 |
| 1420614_at   | Dynlt3        | dynein light chain Tctex-type 3                                               | -1.3  | 0.053 | -1.13 | 0.211 | -1.33 | 0.191 | -1.07 | 0.833 | -1.21 |
| 1450873_at   | Gtpbp4        | GTP binding protein 4                                                         | -1.39 | 0.249 | -1.18 | 0.106 | -1.19 | 0.144 | -1.19 | 0.263 | -1.24 |
| 1442150_at   | ---           | ---                                                                           | -1.02 | 0.813 | -1.21 | 0.492 | -1.67 | 0.042 | -1.23 | 0.372 | -1.28 |
| 1447032_at   | Clybl         | Citrate lyase beta like                                                       | -1.1  | 0.36  | -1.04 | 0.91  | -1.83 | 0.03  | -1.48 | 0.606 | -1.37 |
| 1444589_at   | LOC240038     | similar to reduced expression 2                                               | -1.34 | 0.112 | -1.07 | 0.748 | -1.37 | 0.029 | -1.42 | 0.192 | -1.3  |
| 1450356_at   | Trhr2         | thyrotropin releasing hormone receptor 2                                      | -1.26 | 0.333 | -1.05 | 0.95  | -1.51 | 0.068 | -1.01 | 0.986 | -1.21 |
| 1440267_at   | Pex1          | peroxisome biogenesis factor 1                                                | -1.1  | 0.686 | -1.24 | 0.275 | -1.45 | 0.102 | -1.44 | 0.405 | -1.31 |
| 1449923_at   | 1700018F24Rik | RIKEN cDNA 1700018F24 gene                                                    | -1.5  | 0.131 | -1.12 | 0.683 | -1.17 | 0.102 | -1.15 | 0.125 | -1.24 |
| 1459575_at   | D1ErtD704e    | DNA segment, Chr 1, ERATO Doi 704, expressed                                  | -1.5  | 0.388 | -1.23 | 0.612 | -1.07 | 0.875 | -1.81 | 0.39  | -1.4  |
| 1434901_at   | Gm1103        | gene model 1103, (NCBI)                                                       | -1.21 | 0.268 | -1.46 | 0.013 | -1.11 | 0.146 | -1.22 | 0.011 | -1.25 |
| 1455091_at   | 3222402P14Rik | RIKEN cDNA 3222402P14 gene                                                    | -1.11 | 0.394 | -1.27 | 0.125 | -1.38 | 0.131 | -1.43 | 0.178 | -1.3  |
| 1437543_at   | Fubp1         | far upstream element (FUSE) binding protein 1                                 | -1.13 | 0.218 | -1.26 | 0.275 | -1.37 | 0.088 | -1.17 | 0.372 | -1.23 |
| 1447491_at   | Lrrc8d        | Leucine rich repeat containing 8D                                             | -1.39 | 0.016 | -1.28 | 0.191 | -1.1  | 0.722 | -1.26 | 0.39  | -1.26 |
| 1434807_s_at | Mtx3          | metaxin 3                                                                     | -1.28 | 0.092 | -1.08 | 0.724 | -1.42 | 0.058 | -1.19 | 0.578 | -1.24 |
| 1426850_a_at | Map2k6        | mitogen activated protein kinase kinase 6                                     | -1.17 | 0.17  | -1.44 | 0.396 | -1.16 | 0.519 | -1.36 | 0.127 | -1.28 |
| 1442361_at   | Itga2b        | Integrin alpha 2b                                                             | -1.14 | 0.618 | -1.65 | 0.38  | -1.07 | 0.903 | -1.02 | 0.964 | -1.22 |
| 1448095_at   | ---           | Transcribed locus                                                             | -1.15 | 0.232 | -1.46 | 0.447 | -1.16 | 0.37  | -1.42 | 0.281 | -1.3  |

|              |                   |                                                                                           |       |       |       |       |       |       |       |       |       |
|--------------|-------------------|-------------------------------------------------------------------------------------------|-------|-------|-------|-------|-------|-------|-------|-------|-------|
| 1436581_at   | Ccdc39            | coiled-coil domain containing 39                                                          | -1.16 | 0.238 | -1.55 | 0.119 | -1.11 | 0.671 | -1.18 | 0.309 | -1.25 |
| 1435982_at   | Stx12             | syntaxis 12                                                                               | -1.12 | 0.463 | -1.08 | 0.612 | -1.68 | 0.064 | -1.05 | 0.523 | -1.23 |
| 1429819_at   | Nmnat1            | nicotinamide nucleotide adenyltransferase 1                                               | -1.09 | 0.57  | -1.33 | 0.246 | -1.35 | 0.166 | -2.21 | 0.037 | -1.49 |
| 1439837_at   | Tnrc15            | trinucleotide repeat containing 15                                                        | -1.26 | 0.232 | -1.23 | 0.42  | -1.24 | 0.016 | -1.46 | 0.034 | -1.3  |
| 1428214_at   | Tomm7             | translocase of outer mitochondrial membrane 7 homolog (yeast)                             | -1.14 | 0.264 | -1.27 | 0.182 | -1.34 | 0.18  | -1.22 | 0.229 | -1.24 |
| 1457112_at   | A230106N23        | hypothetical protein A230106N23                                                           | -1.1  | 0.805 | -1.45 | 0.162 | -1.23 | 0.226 | -1.18 | 0.366 | -1.24 |
| 1419205_x_at | Gpatc4            | G patch domain containing 4                                                               | -1.02 | 0.704 | -1.27 | 0.332 | -1.55 | 0.11  | -1.19 | 0.234 | -1.26 |
| 1454402_at   | 3110048L19Rik     | RIKEN cDNA 3110048L19 gene                                                                | -1.32 | 0.162 | -1.03 | 0.867 | -1.45 | 0.009 | -1.71 | 0.065 | -1.38 |
| 1421762_at   | Kcnj5             | potassium inwardly-rectifying channel, subfamily J, member 5                              | -1.14 | 0.71  | -1.24 | 0.079 | -1.36 | 0.246 | -1.38 | 0.541 | -1.28 |
| 1456825_at   | Wdr33             | WD repeat domain 33                                                                       | -1.1  | 0.574 | -1.14 | 0.807 | -1.59 | 0.15  | -1.58 | 0.026 | -1.35 |
| 1447522_s_at | Tnks2             | tankyrase, TRF1-interacting ankyrin-related ADP-ribose polymerase 2                       | -1.19 | 0.027 | -1.1  | 0.541 | -1.51 | 0     | -1.29 | 0.123 | -1.27 |
| 1430713_s_at | Ndufa13           | NADH dehydrogenase (ubiquinone) 1 alpha subcomplex, 13                                    | -1.29 | 0.222 | -1.31 | 0.12  | -1.14 | 0.318 | -1.29 | 0.176 | -1.26 |
| 1456142_x_at | Morf41            | mortality factor 4 like 1 /// similar to mortality factor 4 like 1 isoform b /// RIKEN cC | -1.2  | 0.133 | -1.26 | 0.047 | -1.27 | 0.042 | -1.2  | 0.019 | -1.23 |
| 1430476_at   | Srp54             | signal recognition particle 54                                                            | -1.03 | 0.972 | -2.11 | 0.065 | -1.03 | 0.931 | -1.27 | 0.271 | -1.36 |
| 1434062_at   | Rabgap1l          | RAB GTPase activating protein 1-like                                                      | -1.24 | 0.098 | -1.16 | 0.336 | -1.35 | 0.011 | -1.39 | 0.374 | -1.28 |
| 1425358_at   | RioK1             | RIO kinase 1 (yeast)                                                                      | -1.12 | 0.665 | -1.36 | 0.081 | -1.27 | 0.315 | -1.21 | 0.507 | -1.24 |
| 1455630_at   | 1700010H15Rik     | RIKEN cDNA 1700010H15 gene                                                                | -1.23 | 0.216 | -1.26 | 0.601 | -1.23 | 0.092 | -1.41 | 0.256 | -1.29 |
| 1437359_at   | Rnps1             | Ribonucleic acid binding protein S1                                                       | -1.53 | 0.239 | -1.22 | 0.19  | -1.07 | 0.799 | -1.07 | 0.517 | -1.22 |
| 1456928_at   | ---               | ---                                                                                       | -1.06 | 0.887 | -1.44 | 0.066 | -1.29 | 0.119 | -1.08 | 0.846 | -1.22 |
| 1458414_at   | D2ErtD93e         | DNA segment, Chr 2, ERATO Doi 93, expressed                                               | -1.06 | 0.756 | -1.32 | 0.409 | -1.41 | 0.108 | -1.11 | 0.402 | -1.22 |
| 1430180_at   | Map2k5            | mitogen activated protein kinase kinase 5                                                 | -1.16 | 0.644 | -1.32 | 0.29  | -1.26 | 0.223 | -1.73 | 0.039 | -1.37 |
| 1457111_at   | AA415038          | expressed sequence AA415038                                                               | -1.04 | 0.753 | -1.09 | 0.552 | -1.84 | 0.102 | -1.31 | 0.501 | -1.32 |
| 1441063_at   | Eif2c3            | eukaryotic translation initiation factor 2C, 3                                            | -1.11 | 0.541 | -1.1  | 0.552 | -1.67 | 0.087 | -1.14 | 0.318 | -1.25 |
| 1450640_x_at | Atp5k             | ATP synthase, H+ transporting, mitochondrial F1F0 complex, subunit e                      | -1.25 | 0.012 | -1.35 | 0.029 | -1.14 | 0.09  | -1.04 | 0.488 | -1.2  |
| 1434343_at   | 5730403M16Rik     | RIKEN cDNA 5730403M16 gene                                                                | -1.18 | 0.601 | -1.1  | 0.659 | -1.51 | 0.018 | -1.5  | 0.148 | -1.32 |
| 1457510_at   | Phf14             | PHD finger protein 14                                                                     | -1    | 0.998 | -1.19 | 0.325 | -1.74 | 0.081 | -1.56 | 0.195 | -1.37 |
| 1437721_at   | Coro1c            | coronin, actin binding protein 1C                                                         | -1.15 | 0.896 | -1.25 | 0.631 | -1.34 | 0.479 | -1.1  | 0.64  | -1.21 |
| 1429283_at   | 1500009M05Rik     | RIKEN cDNA 1500009M05 gene                                                                | -1.09 | 0.785 | -1.15 | 0.228 | -1.6  | 0.13  | -1.36 | 0.297 | -1.3  |
| 1429940_at   | Cdc73             | Vcell division cycle 73, Paf1/RNA polymerase II complex component, homolog (S             | -1.12 | 0.687 | -1.23 | 0.232 | -1.41 | 0.052 | -1.27 | 0.239 | -1.26 |
| 1439931_at   | Gsk3b             | glycogen synthase kinase 3 beta                                                           | -1.15 | 0.006 | -1.05 | 0.837 | -1.69 | 0.022 | -1.22 | 0.03  | -1.28 |
| 1420982_at   | Rbm39             | RNA binding motif protein 39                                                              | -1.04 | 0.887 | -1.5  | 0.194 | -1.28 | 0.064 | -1.13 | 0.214 | -1.23 |
| 1442510_at   | LOC665792 /// LOC | hypothetical protein LOC665792 /// hypothetical protein LOC669957 /// hypothetic          | -1.07 | 0.757 | -1.32 | 0.278 | -1.38 | 0.562 | -1.47 | 0.196 | -1.31 |
| 1421867_at   | Nr3c1             | nuclear receptor subfamily 3, group C, member 1                                           | -1.25 | 0.104 | -1.1  | 0.122 | -1.41 | 0.202 | -1.55 | 0.109 | -1.33 |
| 1454810_s_at | Al315068          | expressed sequence Al315068                                                               | -1.45 | 0.13  | -1.16 | 0.278 | -1.16 | 0.351 | -1.13 | 0.208 | -1.22 |
| 1419365_at   | Pex11a            | peroxisomal biogenesis factor 11a                                                         | -1.15 | 0.656 | -1.56 | 0.309 | -1.11 | 0.656 | -1.21 | 0.586 | -1.26 |
| 1419886_at   | DXErtD223e        | DNA segment, Chr X, ERATO Doi 223, expressed                                              | -1.1  | 0.721 | -1.27 | 0.158 | -1.4  | 0.148 | -1.01 | 0.973 | -1.19 |
| 1428844_a_at | Bclaf1            | BCL2-associated transcription factor 1                                                    | -1.16 | 0.642 | -1.26 | 0.129 | -1.32 | 0.062 | -1.4  | 0.058 | -1.28 |
| 1425319_s_at | 6530403A03Rik     | RIKEN cDNA 6530403A03 gene                                                                | -1.05 | 0.833 | -1.28 | 0.32  | -1.45 | 0.042 | -1.65 | 0.029 | -1.36 |
| 1444408_at   | B130040O20Rik     | RIKEN cDNA B130040O20 gene                                                                | -1.27 | 0.208 | -1.19 | 0.408 | -1.27 | 0.102 | -1.77 | 0.143 | -1.38 |
| 1428951_at   | Nol8              | nucleolar protein 8                                                                       | -1.07 | 0.8   | -1.3  | 0.115 | -1.4  | 0.042 | -1.09 | 0.57  | -1.22 |
| 1425728_at   | RP23-14F5.7       | hypothetical gene Rp23-14f5.7                                                             | -1.17 | 0.715 | -1.01 | 0.971 | -1.73 | 0.024 | -2.12 | 0.002 | -1.51 |
| 1438675_at   | Sfrs8             | splicing factor, arginine/serine-rich 8                                                   | -1.04 | 0.867 | -1.21 | 0.135 | -1.6  | 0.306 | -1.52 | 0.066 | -1.34 |
| 1445884_at   | 1110007A13Rik     | RIKEN cDNA 1110007A13 gene                                                                | -1.35 | 0.014 | -1.08 | 0.828 | -1.33 | 0.094 | -1.38 | 0.097 | -1.29 |
| 1440260_at   | A930007B11Rik     | RIKEN cDNA A930007B11 gene                                                                | -1.1  | 0.628 | -1.09 | 0.447 | -1.69 | 0.031 | -1.71 | 0.081 | -1.4  |
| 1445091_at   | Atr               | ataxia telangiectasia and Rad3 related                                                    | -1.22 | 0.315 | -1.32 | 0.407 | -1.19 | 0.196 | -1.64 | 0.089 | -1.34 |
| 1424423_at   | Lenep /// Flad1   | lens epithelial protein /// RFad1, flavin adenine dinucleotide synthetase, homolog        | -1.08 | 0.883 | -1.27 | 0.224 | -1.41 | 0.142 | -1.11 | 0.474 | -1.22 |
| 1424276_at   | Snx16             | sorting nexin 16                                                                          | -1.11 | 0.55  | -1.35 | 0.127 | -1.29 | 0.018 | -1.26 | 0.315 | -1.25 |
| 1441901_x_at | Fahd2a            | fumarylacetoacetate hydrolase domain containing 2A                                        | -1.44 | 0.019 | -1.14 | 0.177 | -1.18 | 0.473 | -1.26 | 0.192 | -1.25 |
| 1445484_at   | Cycc              | cytochrome c, somatic                                                                     | -1.05 | 0.826 | -1.63 | 0.491 | -1.18 | 0.536 | -1.13 | 0.839 | -1.25 |
| 1439582_at   | Macf1             | Microtubule-actin crosslinking factor 1                                                   | -1.06 | 0.636 | -1.05 | 0.698 | -1.93 | 0.024 | -1.81 | 0.243 | -1.46 |
| 1437699_at   | E430014B02Rik     | RIKEN cDNA E430014B02 gene                                                                | -1.06 | 0.882 | -1.04 | 0.919 | -1.96 | 0.031 | -3.88 | 0.055 | -1.98 |
| 1452491_at   | 2900060N18Rik     | RIKEN cDNA 2900060N18 gene                                                                | -1.04 | 0.073 | -1.27 | 0.647 | -1.49 | 0.343 | -1.03 | 0.965 | -1.21 |
| 1448047_at   | ---               | Adult male medulla oblongata cDNA, RIKEN full-length enriched library, clone:63           | -1.33 | 0.045 | -1.42 | 0.203 | -1.04 | 0.843 | -1.08 | 0.699 | -1.22 |

|              |                     |                                                                                       |       |       |       |       |       |       |       |       |       |
|--------------|---------------------|---------------------------------------------------------------------------------------|-------|-------|-------|-------|-------|-------|-------|-------|-------|
| 1452642_at   | Tmem16f             | Transmembrane protein 16F                                                             | -1.2  | 0.381 | -1.44 | 0.319 | -1.12 | 0.328 | -1.31 | 0.299 | -1.27 |
| 1420623_x_at | Hspa8 /// LOC6212   | heat shock protein 8 /// similar to heat shock protein 8 /// heat shock protein 8 pse | -1.25 | 0.265 | -1.3  | 0.088 | -1.18 | 0.018 | -1.25 | 0.042 | -1.24 |
| 1433941_at   | Pib5pa              | phosphatidylinositol (4,5) bisphosphate 5-phosphatase, A                              | -1.17 | 0.539 | -1.27 | 0.044 | -1.29 | 0.554 | -1.03 | 0.865 | -1.19 |
| 1450340_a_at | Clcnkb              | chloride channel Kb                                                                   | -1.03 | 0.781 | -1.03 | 0.961 | -2.11 | 0.08  | -1.61 | 0.565 | -1.44 |
| 1425043_s_at | 0610037D15Rik       | RIKEN cDNA 0610037D15 gene                                                            | -1.66 | 0.004 | -1.02 | 0.977 | -1.2  | 0.456 | -1.7  | 0.042 | -1.39 |
| 1420068_at   | ---                 | ---                                                                                   | -1.12 | 0.848 | -1.14 | 0.705 | -1.53 | 0.178 | -1.47 | 0.577 | -1.32 |
| 1437224_at   | Rtn4                | reticulon 4                                                                           | -1.21 | 0.331 | -1.05 | 0.818 | -1.55 | 0.011 | -1.07 | 0.691 | -1.22 |
| 1450966_at   | Crot                | carnitine O-octanoyltransferase                                                       | -1.18 | 0.201 | -1.72 | 0.006 | -1.01 | 0.98  | -1.33 | 0.216 | -1.31 |
| 1444728_at   | Exoc4               | Exocyst complex component 4                                                           | -1.02 | 0.947 | -1.21 | 0.132 | -1.63 | 0.061 | -1.17 | 0.389 | -1.26 |
| 1445556_at   | ---                 | Transcribed locus                                                                     | -1.36 | 0.442 | -1.13 | 0.773 | -1.25 | 0.7   | -1.67 | 0.408 | -1.35 |
| 1446205_at   | ---                 | 0 day neonate thymus cDNA, RIKEN full-length enriched library, clone:A430057L         | -1.05 | 0.729 | -1.51 | 0.335 | -1.25 | 0.41  | -1.34 | 0.196 | -1.28 |
| 1440690_at   | Nipbl               | Nipped-B homolog (Drosophila)                                                         | -1.06 | 0.68  | -1.16 | 0.175 | -1.63 | 0.011 | -1.29 | 0.377 | -1.28 |
| 1433574_at   | Cdc37I1             | cell division cycle 37 homolog (S. cerevisiae)-like 1                                 | -1.11 | 0.591 | -1.11 | 0.146 | -1.63 | 0.006 | -1.41 | 0.061 | -1.31 |
| 1441624_at   | Sorbs2              | sorbin and SH3 domain containing 2                                                    | -1.25 | 0.444 | -1.34 | 0.279 | -1.14 | 0.221 | -1.34 | 0.224 | -1.27 |
| 1417980_a_at | Insig2              | insulin induced gene 2                                                                | -1.03 | 0.861 | -1.46 | 0.071 | -1.32 | 0.016 | -1.46 | 0.054 | -1.31 |
| 1437290_at   | Impad1              | inositol monophosphatase domain containing 1                                          | -1.31 | 0.296 | -1.1  | 0.331 | -1.34 | 0.059 | -1.23 | 0.543 | -1.25 |
| 1420932_at   | Mapk8               | mitogen activated protein kinase 8                                                    | -1.41 | 0.027 | -1.08 | 0.084 | -1.27 | 0     | -1.3  | 0.146 | -1.27 |
| 1428175_at   | Tmem161b            | transmembrane protein 161B                                                            | -1.19 | 0.342 | -1.18 | 0.434 | -1.36 | 0.049 | -1    | 0.989 | -1.18 |
| 1432995_at   | 2900057E15Rik       | RIKEN cDNA 2900057E15 gene                                                            | -1.21 | 0.389 | -1.26 | 0.42  | -1.25 | 0.225 | -1.08 | 0.767 | -1.2  |
| 1447150_at   | Phr1                | pam, highwire, rpm 1                                                                  | -1.23 | 0.173 | -1.41 | 0.125 | -1.11 | 0.462 | -1.85 | 0.075 | -1.4  |
| 1420586_at   | 2900054J07Rik       | RIKEN cDNA 2900054J07 gene                                                            | -1.43 | 0.313 | -1.24 | 0.65  | -1.1  | 0.559 | -1.07 | 0.848 | -1.21 |
| 1416977_at   | Stam2               | signal transducing adaptor molecule (SH3 domain and ITAM motif) 2                     | -1.73 | 0.082 | -1.05 | 0.888 | -1.12 | 0.477 | -1.57 | 0.012 | -1.37 |
| 1459305_at   | Rai17               | Retinoic acid induced 17                                                              | -1.21 | 0.188 | -1.34 | 0.271 | -1.18 | 0.279 | -1.01 | 0.965 | -1.19 |
| 1457679_at   | Dclre1c             | DNA cross-link repair 1C, PSO2 homolog (S. cerevisiae)                                | -1    | 0.995 | -1.41 | 0.454 | -1.4  | 0.03  | -1.4  | 0.409 | -1.3  |
| 1454703_x_at | Snord22             | small nucleolar RNA, C/D box 22                                                       | -1.41 | 0.394 | -1.33 | 0.177 | -1.04 | 0.874 | -1.06 | 0.84  | -1.21 |
| 1434166_at   | 9330151L19Rik       | RIKEN cDNA 9330151L19 gene                                                            | -1.2  | 0.389 | -1.41 | 0.186 | -1.13 | 0.535 | -1.09 | 0.704 | -1.21 |
| 1429595_at   | 2700049A03Rik       | RIKEN cDNA 2700049A03 gene                                                            | -1.38 | 0.03  | -1.23 | 0.513 | -1.13 | 0.549 | -1.04 | 0.835 | -1.2  |
| 1441753_at   | 4921505C17Rik       | RIKEN cDNA 4921505C17 gene                                                            | -1.11 | 0.481 | -1.09 | 0.805 | -1.65 | 0.127 | -1.35 | 0.154 | -1.3  |
| 1428755_at   | Creb1               | cAMP responsive element binding protein 1                                             | -1.34 | 0.022 | -1.13 | 0.254 | -1.26 | 0.007 | -1.39 | 0.13  | -1.28 |
| 1459928_at   | Lcor                | ligand dependent nuclear receptor corepressor                                         | -1.37 | 0.574 | -1.2  | 0.718 | -1.16 | 0.269 | -1.01 | 0.967 | -1.19 |
| 1435565_at   | 1500011H22Rik       | RIKEN cDNA 1500011H22 gene                                                            | -1.2  | 0.323 | -1.09 | 0.559 | -1.49 | 0.052 | -1.41 | 0.015 | -1.3  |
| 1456806_at   | A130010C12Rik       | RIKEN cDNA A130010C12 gene                                                            | -1.55 | 0.283 | -1.14 | 0.77  | -1.11 | 0.671 | -1.22 | 0.183 | -1.26 |
| 1419608_a_at | Mia1                | melanoma inhibitory activity 1                                                        | -1.18 | 0.148 | -1.16 | 0.79  | -1.41 | 0.251 | -1.46 | 0.475 | -1.3  |
| 1458508_at   | Matr3               | matrin 3                                                                              | -1.01 | 0.942 | -1.18 | 0.379 | -1.69 | 0.004 | -1.56 | 0.076 | -1.36 |
| 1437384_at   | 1700015E13Rik       | RIKEN cDNA 1700015E13 gene                                                            | -1.47 | 0.147 | -1.25 | 0.378 | -1.06 | 0.848 | -1.77 | 0.086 | -1.39 |
| 1435274_at   | 4921517N04Rik       | RIKEN cDNA 4921517N04 gene                                                            | -1.14 | 0.142 | -1.17 | 0.097 | -1.44 | 0.036 | -1.16 | 0.478 | -1.23 |
| 1442213_at   | LOC552908           | hypothetical LOC552908                                                                | -1.01 | 0.974 | -1.14 | 0.769 | -1.79 | 0.035 | -1.07 | 0.879 | -1.25 |
| 1430680_a_at | 5830417I10Rik /// L | RIKEN cDNA 5830417I10 gene /// similar to Dingo protein isoform 2 /// similar to I    | -1.19 | 0.111 | -1.69 | 0.08  | -1.01 | 0.914 | -1.35 | 0.291 | -1.31 |
| 1440861_a_at | ---                 | ---                                                                                   | -1.16 | 0.261 | -1.03 | 0.863 | -1.68 | 0.004 | -1.29 | 0.06  | -1.29 |
| 1427208_at   | Zfp451              | zinc finger protein 451                                                               | -1.27 | 0.282 | -1.4  | 0.033 | -1.09 | 0.662 | -1.15 | 0.621 | -1.23 |
| 1454640_at   | Chchd7              | coiled-coil-helix-coiled-coil-helix domain containing 7                               | -1.07 | 0.462 | -1.54 | 0.003 | -1.2  | 0.093 | -1.05 | 0.622 | -1.21 |
| 1443579_s_at | Depdc6              | DEP domain containing 6                                                               | -1.04 | 0.581 | -1.35 | 0.053 | -1.39 | 0.329 | -1.02 | 0.965 | -1.2  |
| 1452322_a_at | Brwd1               | bromodomain and WD repeat domain containing 1                                         | -1.39 | 0.028 | -1.12 | 0.677 | -1.23 | 0.208 | -1.73 | 0.029 | -1.37 |
| 1428920_at   | ---                 | ---                                                                                   | -1.25 | 0.345 | -1.37 | 0.198 | -1.11 | 0.482 | -1.38 | 0.265 | -1.28 |
| 1459011_at   | Uchl5               | Ubiquitin carboxyl-terminal esterase L5                                               | -1.25 | 0.045 | -1.09 | 0.636 | -1.41 | 0.008 | -1.36 | 0.419 | -1.28 |
| 1435980_x_at | Wnt6                | wingless-related MMTV integration site 6                                              | -1.2  | 0.453 | -1.47 | 0.309 | -1.1  | 0.544 | -1.08 | 0.785 | -1.21 |
| 1418211_at   | p                   | pink-eyed dilution                                                                    | -1.49 | 0.284 | -1.3  | 0.102 | -1.01 | 0.946 | -1.05 | 0.85  | -1.21 |
| 1458369_at   | 2310050B05Rik       | RIKEN cDNA 2310050B05 gene                                                            | -1.22 | 0.249 | -1.27 | 0.536 | -1.22 | 0.323 | -1.01 | 0.944 | -1.18 |
| 1420107_at   | Bbs4                | Bardet-Biedl syndrome 4 homolog (human)                                               | -1.01 | 0.971 | -1.55 | 0.416 | -1.26 | 0.089 | -1.19 | 0.348 | -1.25 |
| 1443088_at   | 9930031P18Rik       | RIKEN cDNA 9930031P18 gene                                                            | -1.01 | 0.972 | -1.08 | 0.602 | -1.98 | 0.034 | -1.54 | 0.156 | -1.4  |
| 1424252_at   | Hnrpd1              | heterogeneous nuclear ribonucleoprotein D-like                                        | -1.31 | 0.194 | -1.21 | 0.104 | -1.2  | 0.213 | -1.34 | 0.225 | -1.26 |
| 1445870_at   | Cdc42ep2            | CDC42 effector protein (Rho GTPase binding) 2                                         | -1.12 | 0.426 | -1.34 | 0.395 | -1.26 | 0.473 | -1.29 | 0.388 | -1.26 |
| 1451464_at   | Mfap3               | microfibrillar-associated protein 3                                                   | -1.16 | 0.716 | -1.42 | 0.386 | -1.17 | 0.444 | -1.11 | 0.507 | -1.21 |

|              |                    |                                                                                               |       |       |       |       |       |       |       |       |       |
|--------------|--------------------|-----------------------------------------------------------------------------------------------|-------|-------|-------|-------|-------|-------|-------|-------|-------|
| 1432099_a_at | Prodh2             | proline dehydrogenase (oxidase) 2                                                             | -1.27 | 0.125 | -1.2  | 0.128 | -1.24 | 0.203 | -1.24 | 0.178 | -1.24 |
| 1428084_at   | Krr1               | KRR1, small subunit (SSU) processome component, homolog (yeast)                               | -1.14 | 0.052 | -1.2  | 0.025 | -1.39 | 0.034 | -1.11 | 0.333 | -1.21 |
| 1426232_at   | BC024479           | cDNA sequence BC024479                                                                        | -1.19 | 0.535 | -1.07 | 0.793 | -1.53 | 0.113 | -1.42 | 0.062 | -1.3  |
| 1425788_a_at | Echdc2             | enoyl Coenzyme A hydratase domain containing 2                                                | -1.05 | 0.781 | -1.1  | 0.07  | -1.79 | 0.032 | -2.25 | 0.081 | -1.55 |
| 1454969_at   | Lypd6              | LY6/PLAUR domain containing 6                                                                 | -1.13 | 0.017 | -1.39 | 0.1   | -1.22 | 0.287 | -1.85 | 0.222 | -1.4  |
| 1454921_at   | Gm561              | gene model 561, (NCBI)                                                                        | -1.05 | 0.321 | -1.4  | 0.046 | -1.32 | 0.121 | -1.25 | 0.18  | -1.25 |
| 1437461_s_at | Rnpc3              | RNA-binding region (RNP1, RRM) containing 3                                                   | -1.3  | 0.458 | -1.16 | 0.425 | -1.26 | 0.164 | -1.05 | 0.707 | -1.19 |
| 1429128_x_at | Nfkb2              | nuclear factor of kappa light polypeptide gene enhancer in B-cells 2, p49/p100                | -1.09 | 0.558 | -1.35 | 0.714 | -1.3  | 0.199 | -1.78 | 0.213 | -1.38 |
| 1431239_at   | Nono               | non-POU-domain-containing, octamer binding protein                                            | -1.13 | 0.512 | -1.29 | 0.157 | -1.3  | 0.155 | -1.12 | 0.551 | -1.21 |
| 1437022_at   | D130059P03Rik      | RIKEN cDNA D130059P03 gene                                                                    | -1.05 | 0.114 | -1.16 | 0.394 | -1.63 | 0.018 | -1.18 | 0.263 | -1.25 |
| 1444753_at   | Nek7               | NIMA (never in mitosis gene a)-related expressed kinase 7                                     | -1    | 0.981 | -1.18 | 0.549 | -1.72 | 0.042 | -1.38 | 0.431 | -1.32 |
| 1438497_at   | 2810423E13Rik      | RIKEN cDNA 2810423E13 gene                                                                    | -1.1  | 0.44  | -1.44 | 0.161 | -1.21 | 0.337 | -1.32 | 0.218 | -1.27 |
| 1432073_at   | 1700113I22Rik      | RIKEN cDNA 1700113I22 gene                                                                    | -1.65 | 0.049 | -1.2  | 0.402 | -1.01 | 0.927 | -1.3  | 0.429 | -1.29 |
| 1440254_at   | ---                | Transcribed locus, weakly similar to XP_417295.1 PREDICTED: similar to TAF3                   | -1.08 | 0.685 | -1.22 | 0.013 | -1.45 | 0.196 | -1.21 | 0.249 | -1.24 |
| 1426013_s_at | Plekha4            | pleckstrin homology domain containing, family A (phosphoinositide binding specif              | -1.18 | 0.258 | -1.12 | 0.767 | -1.44 | 0.104 | -1.17 | 0.576 | -1.23 |
| 1435041_at   | Myl6               | myosin, light polypeptide 6, alkali, smooth muscle and non-muscle                             | -1.77 | 0.276 | -1.11 | 0.489 | -1.04 | 0.868 | -1.68 | 0.161 | -1.4  |
| 1433756_at   | S100pbp            | S100P binding protein                                                                         | -1.2  | 0.573 | -1.21 | 0.226 | -1.3  | 0.297 | -1.46 | 0.357 | -1.29 |
| 1437717_x_at | 2610005L07Rik ///  | RIKEN cDNA 2610005L07 gene /// RIKEN cDNA A430108E01 gene /// similar to                      | -1.17 | 0.669 | -1.13 | 0.669 | -1.45 | 0.3   | -1.31 | 0.593 | -1.27 |
| 1460564_at   | Suhw2              | suppressor of hairy wing homolog 2 (Drosophila)                                               | -1.19 | 0.641 | -1.32 | 0.126 | -1.21 | 0.231 | -1.11 | 0.302 | -1.21 |
| 1458419_at   | E130215H24Rik      | RIKEN cDNA E130215H24 gene                                                                    | -1.06 | 0.736 | -1.93 | 0.153 | -1.03 | 0.855 | -1.2  | 0.571 | -1.31 |
| 1455406_at   | ---                | 0 day neonate head cDNA, RIKEN full-length enriched library, clone:4833431M11                 | -1.04 | 0.744 | -1.48 | 0.062 | -1.26 | 0.129 | -1.18 | 0.688 | -1.24 |
| 1458677_at   | Entpd5             | ectonucleoside triphosphate diphosphohydrolase 5                                              | -1.2  | 0.426 | -1.17 | 0.73  | -1.36 | 0.154 | -1.63 | 0.065 | -1.34 |
| 1429760_at   | Rps6ka6            | ribosomal protein S6 kinase polypeptide 6                                                     | -1.27 | 0.497 | -1.53 | 0.461 | -1.01 | 0.957 | -2.39 | 0.058 | -1.55 |
| 1459736_at   | Stk10              | Serine/threonine kinase 10                                                                    | -1.65 | 0.594 | -1.04 | 0.928 | -1.16 | 0.684 | -1.69 | 0.087 | -1.39 |
| 1448959_at   | Ndufs4             | NADH dehydrogenase (ubiquinone) Fe-S protein 4                                                | -1.19 | 0.061 | -1.34 | 0.028 | -1.18 | 0.118 | -1.3  | 0.154 | -1.25 |
| 1440886_at   | Cdc3711            | cell division cycle 37 homolog (S. cerevisiae)-like 1                                         | -1.29 | 0.463 | -1.17 | 0.578 | -1.25 | 0.248 | -1.97 | 0.054 | -1.42 |
| 1438597_x_at | Morf411 /// LOC433 | mortality factor 4 like 1 /// similar to mortality factor 4 like 1 isoform b /// similar to i | -1.34 | 0.122 | -1.09 | 0.779 | -1.31 | 0.01  | -1.16 | 0.076 | -1.22 |
| 1421372_at   | Klk1b4             | kallikrein 1-related peptidase b4                                                             | -1.05 | 0.869 | -1.74 | 0.031 | -1.1  | 0.665 | -1.36 | 0.509 | -1.31 |
| 1436455_at   | Asph               | aspartate-beta-hydroxylase                                                                    | -1.02 | 0.937 | -1.72 | 0.475 | -1.14 | 0.757 | -1.51 | 0.359 | -1.35 |
| 1440636_at   | Mrpl3              | Mitochondrial ribosomal protein L3                                                            | -1.38 | 0.115 | -1.09 | 0.759 | -1.27 | 0.036 | -1.4  | 0.385 | -1.28 |
| 1420177_at   | Igll1              | immunoglobulin lambda-like polypeptide 1                                                      | -1.06 | 0.842 | -1.32 | 0.367 | -1.37 | 0.516 | -1.42 | 0.641 | -1.29 |
| 1439642_at   | 5930403N24Rik      | RIKEN cDNA 5930403N24 gene                                                                    | -1.12 | 0.857 | -1.08 | 0.837 | -1.63 | 0.259 | -1.07 | 0.922 | -1.22 |
| 1454375_at   | 5730458M16Rik      | RIKEN cDNA 5730458M16 gene                                                                    | -1.41 | 0.084 | -1.08 | 0.137 | -1.25 | 0.021 | -1.31 | 0.365 | -1.26 |
| 1452613_at   | Uqcrcq             | ubiquinol-cytochrome c reductase, complex III subunit VII                                     | -1.3  | 0.284 | -1.18 | 0.557 | -1.22 | 0.748 | -1.08 | 0.536 | -1.2  |
| 1438888_at   | Gmcl1              | germ cell-less homolog 1 (Drosophila)                                                         | -1.31 | 0.482 | -1.01 | 0.979 | -1.47 | 0.074 | -1.53 | 0.156 | -1.33 |
| 1430444_at   | 0610006L08Rik      | RIKEN cDNA 0610006L08 gene                                                                    | -1.34 | 0.064 | -1.35 | 0.506 | -1.06 | 0.903 | -1.43 | 0.458 | -1.29 |
| 1432084_at   | 4921515G04Rik      | RIKEN cDNA 4921515G04 gene                                                                    | -1.06 | 0.923 | -1.66 | 0.36  | -1.13 | 0.763 | -2.98 | 0.091 | -1.71 |
| 1447956_at   | C76614             | expressed sequence C76614                                                                     | -1.05 | 0.937 | -1.21 | 0.421 | -1.53 | 0.321 | -1.69 | 0.323 | -1.37 |
| 1457205_at   | Nsf                | N-ethylmaleimide sensitive fusion protein                                                     | -1.11 | 0.769 | -1.16 | 0.161 | -1.49 | 0.179 | -1.49 | 0.087 | -1.31 |
| 1426420_at   | Rbm26              | RNA binding motif protein 26                                                                  | -1.34 | 0.125 | -1.1  | 0.763 | -1.3  | 0.148 | -1.15 | 0.459 | -1.22 |
| 1425001_at   | Rnf146             | ring finger protein 146                                                                       | -1.22 | 0.494 | -1.23 | 0.183 | -1.25 | 0.176 | -1.01 | 0.931 | -1.18 |
| 1430375_a_at | Ccl27              | chemokine (C-C motif) ligand 27                                                               | -1.17 | 0.094 | -1.15 | 0.478 | -1.41 | 0.222 | -1.15 | 0.642 | -1.22 |
| 1422537_a_at | Id2                | inhibitor of DNA binding 2                                                                    | -1.33 | 0.57  | -1.09 | 0.728 | -1.31 | 0.051 | -1.16 | 0.614 | -1.22 |
| 1459791_at   | Dnajc1             | DnaJ (Hsp40) homolog, subfamily C, member 1                                                   | -1.03 | 0.942 | -1.53 | 0.244 | -1.24 | 0.373 | -1.99 | 0.193 | -1.45 |
| 1451347_at   | Ccdc95             | coiled-coil domain containing 95                                                              | -1.37 | 0.109 | -1.4  | 0.351 | -1.01 | 0.958 | -1.07 | 0.515 | -1.21 |
| 1438762_at   | Tcf12              | Transcription factor 12                                                                       | -1.02 | 0.917 | -1.11 | 0.318 | -1.84 | 0.005 | -1.73 | 0.105 | -1.42 |
| 1424658_at   | Taok1              | TAO kinase 1                                                                                  | -1.02 | 0.931 | -1.29 | 0.05  | -1.47 | 0.128 | -1.1  | 0.655 | -1.22 |
| 1438898_at   | ---                | Adult male corpora quadrigemina cDNA, RIKEN full-length enriched library, clone               | -1.26 | 0.669 | -1.45 | 0.392 | -1.05 | 0.936 | -3.56 | 0.016 | -1.83 |
| 1419772_at   | Mllt10             | Myeloid/lymphoid or mixed lineage-leukemia translocation to 10 homolog (Droso                 | -1.3  | 0.441 | -1.23 | 0.406 | -1.18 | 0.621 | -1.28 | 0.635 | -1.25 |
| 1419815_at   | Mett11d1           | methyltransferase 11 domain containing 1                                                      | -1.49 | 0.084 | -1.26 | 0.201 | -1.03 | 0.717 | -2.09 | 0.102 | -1.47 |
| 1446693_at   | ---                | ---                                                                                           | -1.13 | 0.52  | -1.02 | 0.938 | -1.76 | 0.274 | -1.56 | 0.438 | -1.37 |
| 1427352_at   | BC031593           | cDNA sequence BC031593                                                                        | -1.24 | 0.284 | -1.31 | 0.456 | -1.15 | 0.545 | -2.65 | 0.105 | -1.59 |
| 1439466_s_at | Bud31              | BUD31 homolog (yeast)                                                                         | -1.14 | 0.358 | -1.15 | 0.016 | -1.46 | 0.018 | -1.08 | 0.268 | -1.21 |

|              |                    |                                                                                                                                  |       |       |       |       |       |       |       |       |       |
|--------------|--------------------|----------------------------------------------------------------------------------------------------------------------------------|-------|-------|-------|-------|-------|-------|-------|-------|-------|
| 1460728_s_at | Ing4               | inhibitor of growth family, member 4                                                                                             | -1.3  | 0.186 | -1.11 | 0.525 | -1.31 | 0.343 | -1.17 | 0.286 | -1.22 |
| 1449535_at   | Znrf4              | zinc and ring finger 4                                                                                                           | -1.02 | 0.945 | -1.14 | 0.742 | -1.73 | 0.086 | -1.64 | 0.087 | -1.38 |
| 1450226_at   | Prlr               | prolactin receptor                                                                                                               | -1.46 | 0.266 | -1.03 | 0.881 | -1.29 | 0.434 | -2.02 | 0.506 | -1.45 |
| 1444351_at   | Cyfp2              | Cytoplasmic FMR1 interacting protein 2                                                                                           | -1.23 | 0.451 | -1.57 | 0.414 | -1.02 | 0.959 | -1.42 | 0.235 | -1.31 |
| 1416817_at   | Nek7               | NIMA (never in mitosis gene a)-related expressed kinase 7                                                                        | -1.18 | 0.239 | -1.15 | 0.377 | -1.39 | 0.063 | -1.61 | 0.052 | -1.33 |
| 1443654_at   | Ankfy1             | Ankyrin repeat and FYVE domain containing 1                                                                                      | -1.19 | 0.285 | -1.28 | 0.351 | -1.23 | 0.16  | -1.54 | 0.382 | -1.31 |
| 1446489_at   | Sufu               | Suppressor of fused homolog (Drosophila)                                                                                         | -1.29 | 0.232 | -1.22 | 0.359 | -1.19 | 0.454 | -1.76 | 0.06  | -1.36 |
| 1446097_at   | Rbbp8              | Retinoblastoma binding protein 8                                                                                                 | -1.24 | 0.505 | -1.13 | 0.735 | -1.34 | 0.37  | -1    | 0.995 | -1.18 |
| 1438532_at   | Hmcn1              | hemicentin 1                                                                                                                     | -1.19 | 0.323 | -1.11 | 0.697 | -1.45 | 0.24  | -1    | 0.992 | -1.19 |
| 1457690_at   | Kalrn              | kalirin, RhoGEF kinase                                                                                                           | -1.05 | 0.942 | -1.22 | 0.139 | -1.51 | 0.182 | -1.46 | 0.616 | -1.31 |
| 1434307_at   | Tmem64             | transmembrane protein 64                                                                                                         | -1.49 | 0.075 | -1.18 | 0.091 | -1.09 | 0.599 | -1.03 | 0.842 | -1.2  |
| 1430585_at   | 5930436O19Rik      | RIKEN cDNA 5930436O19 gene                                                                                                       | -1.21 | 0.278 | -1.1  | 0.64  | -1.41 | 0.165 | -1.68 | 0.117 | -1.35 |
| 1445651_at   | Atp11b             | ATPase, Class VI, type 11B                                                                                                       | -1.36 | 0.654 | -1.15 | 0.182 | -1.21 | 0.459 | -1.07 | 0.629 | -1.2  |
| 1436602_x_at | Cacna1b            | calcium channel, voltage-dependent, N type, alpha 1B subunit                                                                     | -1.57 | 0.467 | -1.24 | 0.719 | -1    | 0.993 | -2.06 | 0.183 | -1.47 |
| 1443386_at   | C86727             | expressed sequence C86727                                                                                                        | -1.01 | 0.983 | -1.6  | 0.596 | -1.22 | 0.695 | -1.74 | 0.33  | -1.39 |
| 1456583_x_at | Tmem144            | transmembrane protein 144                                                                                                        | -1.34 | 0.392 | -1.08 | 0.809 | -1.31 | 0.6   | -1.02 | 0.959 | -1.19 |
| 1455530_at   | Igh-1a             | Immunoglobulin heavy chain 1a (serum IgG2a)                                                                                      | -1.29 | 0.719 | -1.12 | 0.675 | -1.3  | 0.483 | -2.91 | 0.106 | -1.66 |
| 1438326_at   | 3300001M20Rik      | RIKEN cDNA 3300001M20 gene                                                                                                       | -1.23 | 0.189 | -1.26 | 0.334 | -1.2  | 0.315 | -1.08 | 0.567 | -1.19 |
| 1416665_at   | Coq7               | demethyl-Q 7                                                                                                                     | -1.22 | 0.044 | -1.23 | 0.045 | -1.24 | 0.028 | -1.1  | 0.587 | -1.2  |
| 1449985_at   | 1700072E05Rik      | RIKEN cDNA 1700072E05 gene                                                                                                       | -1.32 | 0.777 | -1.15 | 0.777 | -1.23 | 0.635 | -1.78 | 0.539 | -1.37 |
| 1438887_a_at | Gmcl1              | germ cell-less homolog 1 (Drosophila)                                                                                            | -1.37 | 0.189 | -1.28 | 0.402 | -1.08 | 0.742 | -1.85 | 0.133 | -1.39 |
| 1429108_at   | Msl2l1             | male-specific lethal 2-like 1 (Drosophila)                                                                                       | -1.05 | 0.697 | -1.4  | 0.019 | -1.3  | 0.045 | -1.12 | 0.437 | -1.22 |
| 1460506_s_at | Ndufc2 /// LOC675f | NADH dehydrogenase (ubiquinone) 1, subcomplex unknown, 2 /// similar to NADH dehydrogenase (ubiquinone) 1, subcomplex unknown, 2 | -1.21 | 0.067 | -1.14 | 0.12  | -1.36 | 0.038 | -1.12 | 0.167 | -1.21 |
| 1445534_at   | Flnb               | Filamin, beta                                                                                                                    | -1.08 | 0.762 | -1.3  | 0.245 | -1.36 | 0.321 | -1.42 | 0.318 | -1.29 |
| 1438046_at   | AU019823           | expressed sequence AU019823                                                                                                      | -1.15 | 0.495 | -1.26 | 0.329 | -1.29 | 0.166 | -1.16 | 0.364 | -1.21 |
| 1434942_at   | 2610101J03Rik      | RIKEN cDNA 2610101J03 gene                                                                                                       | -1.18 | 0.144 | -1.11 | 0.311 | -1.45 | 0.003 | -1.12 | 0.577 | -1.22 |
| 1457552_at   | Zfp295             | zinc finger protein 295                                                                                                          | -1.17 | 0.4   | -1.24 | 0.232 | -1.28 | 0.154 | -1.45 | 0.142 | -1.29 |
| 1438247_at   | Klhl15             | kelch-like 15 (Drosophila)                                                                                                       | -1.24 | 0.381 | -1.21 | 0.293 | -1.24 | 0.438 | -1.22 | 0.42  | -1.23 |
| 1459465_at   | 9630020C08Rik      | RIKEN cDNA 9630020C08 gene                                                                                                       | -1.18 | 0.756 | -1.33 | 0.681 | -1.19 | 0.709 | -1.31 | 0.432 | -1.25 |
| 1439341_at   | AK220484           | cDNA sequence AK220484                                                                                                           | -1.21 | 0.646 | -1.55 | 0.105 | -1.03 | 0.707 | -1.72 | 0.15  | -1.38 |
| 1457904_at   | Car8               | carbonic anhydrase 8                                                                                                             | -1    | 0.982 | -1.23 | 0.297 | -1.58 | 0.019 | -1.09 | 0.841 | -1.23 |
| 1423063_at   | Dnmt3a             | DNA methyltransferase 3A                                                                                                         | -1.44 | 0.067 | -1.14 | 0.286 | -1.15 | 0.595 | -1.22 | 0.567 | -1.24 |
| 1451466_at   | D16Ert472e         | DNA segment, Chr 16, ERATO Doi 472, expressed                                                                                    | -1.43 | 0.059 | -1.08 | 0.382 | -1.23 | 0.092 | -1.43 | 0.078 | -1.29 |
| 1457309_at   | AU015228           | expressed sequence AU015228                                                                                                      | -1.09 | 0.885 | -1.13 | 0.804 | -1.58 | 0.369 | -1    | 0.997 | -1.2  |
| 1458032_at   | Tpd52l2            | Tumor protein D52-like 2                                                                                                         | -1.2  | 0.779 | -1.31 | 0.687 | -1.19 | 0.737 | -1.11 | 0.775 | -1.2  |
| 1453303_at   | 4833417J20Rik      | RIKEN cDNA 4833417J20 gene                                                                                                       | -1.11 | 0.663 | -1.41 | 0.379 | -1.21 | 0.516 | -1.26 | 0.45  | -1.25 |
| 1448519_at   | Tead2              | TEA domain family member 2                                                                                                       | -1.11 | 0.92  | -1.35 | 0.714 | -1.25 | 0.185 | -1.18 | 0.693 | -1.22 |
| 1444955_at   | D6Ert469e          | DNA segment, Chr 6, ERATO Doi 469, expressed                                                                                     | -1.05 | 0.931 | -1.23 | 0.556 | -1.48 | 0.213 | -1.18 | 0.698 | -1.24 |
| 1440640_at   | 2010111I01Rik      | RIKEN cDNA 2010111I01 gene                                                                                                       | -1.08 | 0.579 | -1.14 | 0.482 | -1.58 | 0.052 | -1.52 | 0.365 | -1.33 |
| 1428280_at   | Fip1l1             | FIP1 like 1 (S. cerevisiae)                                                                                                      | -1.03 | 0.909 | -1.39 | 0.112 | -1.34 | 0.025 | -1.29 | 0.101 | -1.26 |
| 1447818_x_at | Rheb1              | Ras homolog enriched in brain like 1                                                                                             | -1.3  | 0.22  | -1.11 | 0.69  | -1.31 | 0.388 | -1.54 | 0.221 | -1.31 |
| 1416791_a_at | Nxf1               | nuclear RNA export factor 1 homolog (S. cerevisiae)                                                                              | -1.04 | 0.737 | -1.28 | 0.034 | -1.44 | 0.072 | -1.39 | 0.175 | -1.29 |
| 1455783_at   | ---                | ---                                                                                                                              | -1.15 | 0.066 | -1.23 | 0.763 | -1.32 | 0.556 | -1.67 | 0.242 | -1.34 |
| 1443516_at   | Atxn2              | Ataxin 2                                                                                                                         | -1.03 | 0.933 | -1.08 | 0.67  | -1.85 | 0.032 | -1.01 | 0.984 | -1.24 |
| 1434395_at   | Man1a2             | mannosidase, alpha, class 1A, member 2                                                                                           | -1.17 | 0.488 | -1.08 | 0.635 | -1.51 | 0.119 | -1.15 | 0.552 | -1.23 |
| 1452988_at   | 2610306M01Rik      | RIKEN cDNA 2610306M01 gene                                                                                                       | -1.15 | 0.486 | -1.29 | 0.351 | -1.26 | 0.383 | -1.23 | 0.265 | -1.23 |
| 1436484_at   | C030019I05Rik      | RIKEN cDNA C030019I05 gene                                                                                                       | -1.03 | 0.972 | -1.07 | 0.801 | -1.89 | 0.382 | -2.59 | 0.174 | -1.65 |
| 1440303_at   | Slc7a6os           | Solute carrier family 7, member 6 opposite strand                                                                                | -1.55 | 0.261 | -1.14 | 0.745 | -1.09 | 0.216 | -1.39 | 0.39  | -1.29 |
| 1423246_at   | Txndc4             | thioredoxin domain containing 4 (endoplasmic reticulum)                                                                          | -1.25 | 0.022 | -1.23 | 0.172 | -1.2  | 0.332 | -1.18 | 0.174 | -1.22 |
| 1455997_a_at | Uqcrb              | ubiquinol-cytochrome c reductase binding protein                                                                                 | -1.21 | 0.018 | -1.22 | 0.457 | -1.26 | 0.008 | -1.05 | 0.107 | -1.19 |
| 1444232_at   | Prkg1              | protein kinase, cGMP-dependent, type I                                                                                           | -1.15 | 0.225 | -1.02 | 0.931 | -1.69 | 0.028 | -1    | 0.996 | -1.22 |
| 1455696_a_at | Prpf4b             | PRP4 pre-mRNA processing factor 4 homolog B (yeast)                                                                              | -1.15 | 0.602 | -1.14 | 0.506 | -1.45 | 0.071 | -1.31 | 0.399 | -1.26 |
| 1437274_at   | Copa               | coatomer protein complex subunit alpha                                                                                           | -1.05 | 0.817 | -1.04 | 0.85  | -1.9  | 0     | -2.02 | 0.065 | -1.5  |

|              |                    |                                                                               |       |       |       |       |       |       |       |       |       |
|--------------|--------------------|-------------------------------------------------------------------------------|-------|-------|-------|-------|-------|-------|-------|-------|-------|
| 1434613_at   | 1810013L24Rik      | RIKEN cDNA 1810013L24 gene                                                    | -1.08 | 0.662 | -1.14 | 0.136 | -1.58 | 0.034 | -1.42 | 0.047 | -1.3  |
| 1454532_at   | C030043A13Rik      | RIKEN cDNA C030043A13 gene                                                    | -1    | 0.999 | -1.47 | 0.01  | -1.32 | 0.163 | -1.25 | 0.182 | -1.26 |
| 1454149_a_at | Ccnl2              | cyclin L2                                                                     | -1.32 | 0.452 | -1.18 | 0.399 | -1.19 | 0.222 | -1.3  | 0.142 | -1.25 |
| 1456148_a_at | 1110014K08Rik      | RIKEN cDNA 1110014K08 gene                                                    | -1.22 | 0.55  | -1.19 | 0.231 | -1.28 | 0.368 | -2.22 | 0.167 | -1.48 |
| 1447679_s_at | Bms1l              | BMS1-like, ribosome assembly protein (yeast)                                  | -1.02 | 0.832 | -1.29 | 0.03  | -1.46 | 0.094 | -1.75 | 0.249 | -1.38 |
| 1427935_at   | 2610208E05Rik      | RIKEN cDNA 2610208E05 gene                                                    | -1.03 | 0.837 | -1.32 | 0.044 | -1.4  | 0.188 | -1.3  | 0.508 | -1.26 |
| 1440144_x_at | C330046E03         | hypothetical protein C330046E03                                               | -1.81 | 0.181 | -1.03 | 0.919 | -1.09 | 0.663 | -1.36 | 0.018 | -1.32 |
| 1455165_at   | Rora               | RAR-related orphan receptor alpha                                             | -1.05 | 0.9   | -1.13 | 0.308 | -1.67 | 0.12  | -1.64 | 0.103 | -1.37 |
| 1442078_at   | Ctdspl2            | CTD (carboxy-terminal domain, RNA polymerase II, polypeptide A) small phospho | -1.33 | 0.409 | -1.12 | 0.589 | -1.26 | 0.294 | -1.26 | 0.207 | -1.24 |
| 1428213_at   | 2410003A14Rik      | RIKEN cDNA 2410003A14 gene                                                    | -1.24 | 0.019 | -1.38 | 0.018 | -1.1  | 0.354 | -1.07 | 0.501 | -1.2  |
| 1432806_at   | 9430099H24Rik      | RIKEN cDNA 9430099H24 gene                                                    | -1.46 | 0.08  | -1.09 | 0.643 | -1.19 | 0.484 | -1.47 | 0.14  | -1.3  |
| 1434633_at   | Crebbp             | CREB binding protein                                                          | -1.07 | 0.395 | -1.26 | 0.073 | -1.39 | 0.098 | -1.31 | 0.141 | -1.26 |
| 1460113_at   | B930093H17Rik      | RIKEN cDNA B930093H17 gene                                                    | -1.09 | 0.789 | -1.23 | 0.464 | -1.4  | 0.065 | -1.32 | 0.454 | -1.26 |
| 1441262_at   | Slk                | STE20-like kinase (yeast)                                                     | -1.02 | 0.89  | -1.03 | 0.914 | -2.04 | 0.007 | -1.4  | 0.1   | -1.37 |
| 1435499_at   | D030041N04Rik      | RIKEN cDNA D030041N04 gene                                                    | -1.42 | 0.118 | -1.18 | 0.628 | -1.12 | 0.582 | -1.51 | 0.057 | -1.31 |
| 1437338_x_at | Elp3               | Elongation protein 3 homolog (S. cerevisiae)                                  | -1.18 | 0.15  | -1.26 | 0.152 | -1.25 | 0.136 | -1.47 | 0.075 | -1.29 |
| 1447970_at   | ---                | ---                                                                           | -1.33 | 0.37  | -1.28 | 0.355 | -1.1  | 0.685 | -1.11 | 0.661 | -1.21 |
| 1460430_at   | Rap2c              | RAP2C, member of RAS oncogene family                                          | -1.18 | 0.301 | -1.41 | 0.067 | -1.13 | 0.515 | -1.15 | 0.508 | -1.22 |
| 1439123_at   | Phf21a             | PHD finger protein 21A                                                        | -1.18 | 0.232 | -1.02 | 0.844 | -1.63 | 0.015 | -2.01 | 0.077 | -1.46 |
| 1457214_at   | Ncoa3              | Nuclear receptor coactivator 3                                                | -1.31 | 0.547 | -1.17 | 0.57  | -1.21 | 0.526 | -1.77 | 0.223 | -1.37 |
| 1439080_at   | Erbp2ip            | Erbp2 interacting protein                                                     | -1.14 | 0.36  | -1.15 | 0.588 | -1.42 | 0.142 | -1.55 | 0.203 | -1.32 |
| 1441285_at   | 4833426J09Rik      | RIKEN cDNA 4833426J09 gene                                                    | -1.06 | 0.872 | -1.73 | 0.019 | -1.09 | 0.701 | -1.89 | 0.025 | -1.44 |
| 1458974_at   | Tox                | Thymocyte selection-associated HMG box gene                                   | -1.06 | 0.793 | -1.64 | 0.058 | -1.12 | 0.276 | -1.81 | 0.142 | -1.41 |
| 1428546_at   | Syncrip            | synaptotagmin binding, cytoplasmic RNA interacting protein                    | -1.13 | 0.528 | -1.22 | 0.03  | -1.35 | 0     | -1.03 | 0.876 | -1.18 |
| 1437111_at   | Zc3h12c            | zinc finger CCCH type containing 12C                                          | -1.06 | 0.52  | -1.21 | 0.247 | -1.49 | 0.058 | -1.03 | 0.768 | -1.2  |
| 1438198_at   | Bri3bp             | Bri3 binding protein                                                          | -1.08 | 0.663 | -1.45 | 0.008 | -1.21 | 0.108 | -1.08 | 0.721 | -1.2  |
| 1430603_at   | 4930579K19Rik      | RIKEN cDNA 4930579K19 gene                                                    | -1.05 | 0.717 | -1.65 | 0.295 | -1.13 | 0.706 | -1.27 | 0.213 | -1.27 |
| 1424834_s_at | Itpr2              | inositol 1,4,5-triphosphate receptor 2                                        | -1.39 | 0.052 | -1.29 | 0.095 | -1.05 | 0.791 | -1.59 | 0.31  | -1.33 |
| 1423336_at   | Orc4l              | origin recognition complex, subunit 4-like (S. cerevisiae)                    | -1.12 | 0.545 | -1.23 | 0.134 | -1.36 | 0.024 | -1.23 | 0.055 | -1.24 |
| 1435995_at   | Mrpl22             | mitochondrial ribosomal protein L22                                           | -1.12 | 0.237 | -1.21 | 0.071 | -1.38 | 0.049 | -1.12 | 0.214 | -1.21 |
| 1455644_at   | Vps53              | vacuolar protein sorting 53 (yeast)                                           | -1.25 | 0.032 | -1.24 | 0.197 | -1.19 | 0.251 | -1.28 | 0.117 | -1.24 |
| 1430694_at   | ---                | ---                                                                           | -1.36 | 0.377 | -1.15 | 0.482 | -1.2  | 0.564 | -1.32 | 0.265 | -1.26 |
| 1434931_at   | Neo1               | neogenin                                                                      | -1.24 | 0.056 | -1.4  | 0.06  | -1.08 | 0.709 | -1.63 | 0.52  | -1.34 |
| 1449939_s_at | Dlk1               | delta-like 1 homolog (Drosophila)                                             | -1.48 | 0.229 | -1.01 | 0.978 | -1.29 | 0.664 | -1.04 | 0.759 | -1.2  |
| 1453198_at   | Zfp422-rs1         | zinc finger protein 422, related sequence 1                                   | -1.19 | 0.591 | -1.23 | 0.277 | -1.26 | 0.314 | -1.24 | 0.298 | -1.23 |
| 1434842_s_at | Upf3b              | UPF3 regulator of nonsense transcripts homolog B (yeast)                      | -1.1  | 0.226 | -1.35 | 0.098 | -1.26 | 0.145 | -1.09 | 0.633 | -1.2  |
| 1439329_a_at | Brsk2              | BR serine/threonine kinase 2                                                  | -1.37 | 0.563 | -1.18 | 0.787 | -1.15 | 0.82  | -1.62 | 0.313 | -1.33 |
| 1455103_at   | Ddx46              | DEAD (Asp-Glu-Ala-Asp) box polypeptide 46                                     | -1.32 | 0.121 | -1.21 | 0.249 | -1.17 | 0.235 | -1.29 | 0.137 | -1.24 |
| 1448974_at   | Dcx                | doublecortin                                                                  | -1.04 | 0.95  | -1.51 | 0.099 | -1.22 | 0.297 | -2.84 | 0.174 | -1.65 |
| 1453306_at   | 6330531I01Rik      | RIKEN cDNA 6330531I01 gene                                                    | -1.17 | 0.12  | -1.23 | 0.574 | -1.29 | 0.246 | -1.54 | 0.158 | -1.31 |
| 1441006_at   | Dus4l              | dihydrouridine synthase 4-like (S. cerevisiae)                                | -1.01 | 0.972 | -1.19 | 0.549 | -1.64 | 0.11  | -1.14 | 0.459 | -1.24 |
| 1429016_at   | D1Ert161e /// Glib | DNA segment, Chr 1, ERATO Doi 161, expressed /// galactosidase, beta 1-like   | -1    | 0.997 | -1.64 | 0.194 | -1.2  | 0.505 | -1.02 | 0.926 | -1.21 |
| 1436660_at   | Rrbp1              | ribosome binding protein 1                                                    | -1.1  | 0.371 | -1.18 | 0.474 | -1.45 | 0.289 | -1.39 | 0.277 | -1.28 |
| 1455441_at   | ---                | ---                                                                           | -1.09 | 0.395 | -1.26 | 0.127 | -1.36 | 0.05  | -1.02 | 0.891 | -1.18 |
| 1455986_at   | Zdhhc17            | zinc finger, DHHC domain containing 17                                        | -1.05 | 0.556 | -1.39 | 0.535 | -1.29 | 0.482 | -1.53 | 0.242 | -1.32 |
| 1428273_at   | Abhd13             | abhydrolase domain containing 13                                              | -1.17 | 0.198 | -1.24 | 0.328 | -1.28 | 0.124 | -1.22 | 0.391 | -1.23 |
| 1419222_at   | Tbxa2r             | thromboxane A2 receptor                                                       | -1.34 | 0.398 | -1.32 | 0.135 | -1.06 | 0.767 | -1.58 | 0     | -1.32 |
| 1439170_at   | ---                | ---                                                                           | -1.05 | 0.776 | -1.26 | 0.408 | -1.43 | 0.05  | -1    | 0.97  | -1.19 |
| 1451997_at   | Zfp426             | zinc finger protein 426                                                       | -1.07 | 0.677 | -1.15 | 0.156 | -1.54 | 0.038 | -1.34 | 0.045 | -1.28 |
| 1443037_at   | Nptn               | Neuroplastin                                                                  | -1.02 | 0.923 | -1.15 | 0.479 | -1.69 | 0.031 | -1.16 | 0.189 | -1.25 |
| 1436429_at   | Zfp606             | zinc finger protein 606                                                       | -1.17 | 0.571 | -1.42 | 0.451 | -1.13 | 0.499 | -2.18 | 0.029 | -1.47 |
| 1434629_at   | Zbtb26             | zinc finger and BTB domain containing 26                                      | -1.14 | 0.719 | -1.19 | 0.42  | -1.38 | 0.057 | -1.3  | 0.364 | -1.25 |
| 1454406_at   | 4930453J04Rik      | RIKEN cDNA 4930453J04 gene                                                    | -1.17 | 0.757 | -1.36 | 0.617 | -1.17 | 0.515 | -2.48 | 0.079 | -1.54 |

|              |                   |                                                                                       |       |       |       |       |       |       |       |       |       |
|--------------|-------------------|---------------------------------------------------------------------------------------|-------|-------|-------|-------|-------|-------|-------|-------|-------|
| 1421023_at   | Pik3c2a           | phosphatidylinositol 3-kinase, C2 domain containing, alpha polypeptide                | -1.12 | 0.191 | -1.19 | 0.012 | -1.41 | 0.1   | -1.6  | 0.144 | -1.33 |
| 1434451_at   | ---               | NOD-derived CD11c +ve dendritic cells cDNA, RIKEN full-length enriched library,       | -1.26 | 0.125 | -1.26 | 0.128 | -1.16 | 0.331 | -1.21 | 0.46  | -1.22 |
| 1449750_at   | AA407331          | expressed sequence AA407331                                                           | -1.1  | 0.727 | -1.08 | 0.213 | -1.64 | 0.005 | -1.26 | 0.448 | -1.27 |
| 1446804_at   | Nxn               | nucleoredoxin                                                                         | -1.11 | 0.759 | -1.21 | 0.54  | -1.39 | 0.31  | -1.71 | 0.01  | -1.36 |
| 1425082_s_at | 9030416H16Rik     | RIKEN cDNA 9030416H16 gene                                                            | -1.13 | 0.514 | -1.1  | 0.333 | -1.52 | 0.014 | -1.12 | 0.396 | -1.22 |
| 1457005_at   | Mtfmt             | mitochondrial methionyl-tRNA formyltransferase                                        | -1.13 | 0.203 | -1.38 | 0.231 | -1.19 | 0.357 | -1.28 | 0.493 | -1.25 |
| 1452762_at   | 8430436O14Rik     | RIKEN cDNA 8430436O14 gene                                                            | -1.07 | 0.705 | -1.12 | 0.59  | -1.61 | 0.076 | -1.41 | 0.224 | -1.3  |
| 1452977_at   | Zhx3              | zinc fingers and homeoboxes 3                                                         | -1.16 | 0.53  | -1.27 | 0.109 | -1.26 | 0.259 | -1.62 | 0.086 | -1.33 |
| 1437719_x_at | A230046K03Rik     | RIKEN cDNA A230046K03 gene                                                            | -1.07 | 0.606 | -1.16 | 0.287 | -1.53 | 0.003 | -1.98 | 0.192 | -1.44 |
| 1455653_at   | Ccnj              | cyclin J                                                                              | -1.13 | 0.637 | -1.27 | 0.427 | -1.29 | 0.252 | -1.65 | 0.098 | -1.33 |
| 1438580_at   | Zcchc7            | zinc finger, CCHC domain containing 7                                                 | -1.2  | 0.531 | -1.1  | 0.424 | -1.42 | 0.026 | -1.79 | 0.111 | -1.38 |
| 1431126_a_at | 0610011F06Rik     | RIKEN cDNA 0610011F06 gene                                                            | -1.1  | 0.149 | -1.46 | 0.021 | -1.18 | 0.402 | -1.06 | 0.813 | -1.2  |
| 1455589_at   | 1700100M05Rik     | RIKEN cDNA 1700100M05 gene                                                            | -1.32 | 0.098 | -1.18 | 0.213 | -1.19 | 0.349 | -1.43 | 0.096 | -1.28 |
| 1457020_at   | Gbp111            | GC-rich promoter binding protein 1-like 1                                             | -1.06 | 0.781 | -1.18 | 0.366 | -1.53 | 0.159 | -1.16 | 0.465 | -1.23 |
| 1430366_at   | 5430405H02Rik     | RIKEN cDNA 5430405H02 gene                                                            | -1.21 | 0.342 | -1.08 | 0.864 | -1.45 | 0.249 | -1.01 | 0.984 | -1.18 |
| 1455314_at   | Lpp               | LIM domain containing preferred translocation partner in lipoma                       | -1.1  | 0.578 | -1.07 | 0.504 | -1.65 | 0.016 | -1.58 | 0.088 | -1.35 |
| 1431161_at   | Rgnf              | Rho-guanine nucleotide exchange factor                                                | -1.03 | 0.866 | -1.93 | 0.376 | -1.04 | 0.911 | -2.59 | 0.428 | -1.65 |
| 1434390_at   | Hnrpu             | Heterogeneous nuclear ribonucleoprotein U                                             | -1.2  | 0.535 | -1.28 | 0.349 | -1.2  | 0.455 | -1.13 | 0.702 | -1.2  |
| 1448391_at   | Rab9              | RAB9, member RAS oncogene family                                                      | -1.12 | 0.151 | -1.16 | 0.016 | -1.44 | 0.006 | -1.02 | 0.772 | -1.19 |
| 1440533_at   | Bfar              | Bifunctional apoptosis regulator                                                      | -1.03 | 0.895 | -1.13 | 0.482 | -1.69 | 0.088 | -1.28 | 0.457 | -1.28 |
| 1439705_at   | Ptpn12            | Protein tyrosine phosphatase, non-receptor type 12                                    | -1.14 | 0.469 | -1.02 | 0.911 | -1.69 | 0.007 | -1.08 | 0.355 | -1.23 |
| 1425820_x_at | Gpatc4            | G patch domain containing 4                                                           | -1.44 | 0.216 | -1.12 | 0.702 | -1.16 | 0.287 | -1.26 | 0.282 | -1.25 |
| 1450328_at   | ---               | Adult male testis cDNA, RIKEN full-length enriched library, clone:1700129L04 prc      | -1.01 | 0.983 | -1.85 | 0.39  | -1.09 | 0.455 | -2.92 | 0.215 | -1.72 |
| 1419793_at   | D5Ert615e         | DNA segment, Chr 5, ERATO Doi 615, expressed                                          | -1.47 | 0.073 | -1.06 | 0.875 | -1.21 | 0.384 | -1.23 | 0.714 | -1.24 |
| 1446302_at   | Ccbl1             | Cysteine conjugate-beta lyase 1                                                       | -1.15 | 0.54  | -1.15 | 0.625 | -1.41 | 0.214 | -1.55 | 0.523 | -1.31 |
| 1458712_at   | ---               | ---                                                                                   | -1.02 | 0.957 | -1.42 | 0.345 | -1.31 | 0.38  | -2.55 | 0.129 | -1.57 |
| 1442465_s_at | Strbp             | spermatid perinuclear RNA binding protein                                             | -1.04 | 0.438 | -1.32 | 0.104 | -1.37 | 0.124 | -1.79 | 0.055 | -1.38 |
| 1453934_at   | 4930535C22Rik     | RIKEN cDNA 4930535C22 gene                                                            | -1.86 | 0.247 | -1.06 | 0.799 | -1.03 | 0.827 | -1.51 | 0.256 | -1.37 |
| 1446245_at   | Fmn12             | Formin-like 2                                                                         | -1.04 | 0.904 | -1.06 | 0.826 | -1.83 | 0.014 | -1.4  | 0.098 | -1.33 |
| 1453024_at   | Wdr37             | WD repeat domain 37                                                                   | -1.47 | 0.187 | -1.05 | 0.808 | -1.23 | 0.296 | -1.37 | 0.426 | -1.28 |
| 1424590_at   | Ddx19b            | DEAD (Asp-Glu-Ala-Asp) box polypeptide 19b                                            | -1.36 | 0.059 | -1.32 | 0.147 | -1.04 | 0.875 | -1.52 | 0.136 | -1.31 |
| 1455776_x_at | Bola2             | bolA-like 2 (E. coli)                                                                 | -1.39 | 0.059 | -1.13 | 0.409 | -1.18 | 0.179 | -1.03 | 0.843 | -1.18 |
| 1439820_at   | Ebf1              | Early B-cell factor 1                                                                 | -1.11 | 0.64  | -1.48 | 0.403 | -1.14 | 0.568 | -2.18 | 0.124 | -1.48 |
| 1439293_at   | C130047D21Rik     | RIKEN cDNA C130047D21 gene                                                            | -1.21 | 0.7   | -1.49 | 0.108 | -1.05 | 0.884 | -1.82 | 0.224 | -1.39 |
| 1456320_at   | BC049806          | cDNA sequence BC049806                                                                | -1.04 | 0.824 | -1.5  | 0.022 | -1.21 | 0.349 | -1.12 | 0.537 | -1.22 |
| 1437635_at   | Dcbld2            | discoidin, CUB and LCCL domain containing 2                                           | -1.09 | 0.571 | -1.23 | 0.073 | -1.39 | 0.02  | -1.03 | 0.87  | -1.18 |
| 1415826_at   | Atp6v1h           | ATPase, H+ transporting, lysosomal V1 subunit H                                       | -1.27 | 0.173 | -1.15 | 0.264 | -1.25 | 0.054 | -1.22 | 0.36  | -1.23 |
| 1421318_at   | Ndst4             | N-deacetylase/N-sulfotransferase (heparin glucosaminyl) 4                             | -1.01 | 0.929 | -1.2  | 0.792 | -1.6  | 0.269 | -1.71 | 0.293 | -1.38 |
| 1448237_x_at | Ldhd              | lactate dehydrogenase B                                                               | -1.2  | 0.108 | -1.43 | 0.169 | -1.09 | 0.575 | -1.42 | 0.088 | -1.28 |
| 1416141_a_at | Rps6 /// LOC66657 | ribosomal protein S6 /// similar to 40S ribosomal protein S6 /// similar to 40S ribos | -1.06 | 0.526 | -1.37 | 0.118 | -1.29 | 0.012 | -1.18 | 0.004 | -1.22 |
| 1441549_at   | ---               | ---                                                                                   | -1.32 | 0.111 | -1.19 | 0.283 | -1.18 | 0.377 | -1.36 | 0.367 | -1.26 |
| 1434478_at   | Heca              | headcase homolog (Drosophila)                                                         | -1.17 | 0.383 | -1.3  | 0.098 | -1.2  | 0.358 | -1.6  | 0.236 | -1.32 |
| 1429080_at   | Mphosph10         | M-phase phosphoprotein 10 (U3 small nucleolar ribonucleoprotein)                      | -1.35 | 0.224 | -1.11 | 0.461 | -1.22 | 0.141 | -1.01 | 0.956 | -1.18 |
| 1457033_at   | Gm397 /// XM_486; | gene model 397, (NCBI) /// Mus musculus sequence XM_486399 /// similar to zin         | -1.14 | 0.55  | -1.54 | 0.475 | -1.08 | 0.839 | -1.14 | 0.491 | -1.22 |
| 1456715_at   | Phr1              | Pam, highwire, rpm 1                                                                  | -1.52 | 0.488 | -1.23 | 0.378 | -1.02 | 0.965 | -2.25 | 0.155 | -1.51 |
| 1448018_at   | ---               | ---                                                                                   | -1.1  | 0.704 | -1.11 | 0.593 | -1.56 | 0.142 | -1.3  | 0.571 | -1.27 |
| 1438781_at   | E130014J05Rik     | RIKEN cDNA E130014J05 gene                                                            | -1.21 | 0.12  | -1.07 | 0.669 | -1.44 | 0.08  | -1.38 | 0.239 | -1.27 |
| 1460155_at   | 2410005O16Rik     | RIKEN cDNA 2410005O16 gene                                                            | -1.3  | 0.332 | -1.36 | 0.12  | -1.05 | 0.847 | -1.6  | 0.237 | -1.33 |
| 1423930_at   | Anapc4            | anaphase promoting complex subunit 4                                                  | -1.2  | 0.171 | -1.06 | 0.498 | -1.48 | 0.154 | -1.1  | 0.598 | -1.21 |
| 1453254_at   | 1700034O15Rik     | RIKEN cDNA 1700034O15 gene                                                            | -1.13 | 0.72  | -1.62 | 0.377 | -1.05 | 0.81  | -2.79 | 0.238 | -1.65 |
| 1426148_at   | Gbg1              | globoside alpha-1,3-N-acetylgalactosaminyltransferase 1                               | -1.39 | 0.479 | -1.2  | 0.27  | -1.11 | 0.797 | -1.29 | 0.212 | -1.25 |
| 1442178_at   | Gmgs              | GDP-mannose 4, 6-dehydratase                                                          | -1.21 | 0.476 | -1.11 | 0.705 | -1.37 | 0.226 | -1.39 | 0.01  | -1.27 |
| 1428914_at   | 2310014D11Rik     | RIKEN cDNA 2310014D11 gene                                                            | -1.05 | 0.759 | -1.32 | 0.059 | -1.34 | 0.191 | -1.72 | 0.085 | -1.36 |

|              |                   |                                                                                    |       |       |       |       |       |       |       |       |       |
|--------------|-------------------|------------------------------------------------------------------------------------|-------|-------|-------|-------|-------|-------|-------|-------|-------|
| 1444558_at   | Wdr33             | WD repeat domain 33                                                                | -1.26 | 0.502 | -1.46 | 0.343 | -1.02 | 0.938 | -1.3  | 0.396 | -1.26 |
| 1417886_at   | 1810009A15Rik     | RIKEN cDNA 1810009A15 gene                                                         | -1.14 | 0.023 | -1.23 | 0.011 | -1.3  | 0.213 | -1.15 | 0.234 | -1.21 |
| 1436133_at   | 0610011N22Rik     | RIKEN cDNA 0610011N22 gene                                                         | -1.32 | 0.317 | -1.33 | 0.532 | -1.05 | 0.787 | -1.2  | 0.613 | -1.23 |
| 1428231_at   | Cpsf6             | cleavage and polyadenylation specific factor 6                                     | -1.09 | 0.5   | -1.33 | 0.171 | -1.27 | 0.075 | -1.43 | 0.132 | -1.28 |
| 1446412_at   | Wwox              | WW domain-containing oxidoreductase                                                | -1    | 0.999 | -1.59 | 0.34  | -1.21 | 0.34  | -1.97 | 0.047 | -1.44 |
| 1432800_at   | C030011G24Rik     | RIKEN cDNA C030011G24 gene                                                         | -1.21 | 0.606 | -1.35 | 0.16  | -1.12 | 0.317 | -1.45 | 0.172 | -1.28 |
| 1441843_s_at | 5230400M03Rik     | RIKEN cDNA 5230400M03 gene                                                         | -1.05 | 0.197 | -1.1  | 0.521 | -1.69 | 0.058 | -1.2  | 0.438 | -1.26 |
| 1429640_at   | 1700025F22Rik     | RIKEN cDNA 1700025F22 gene                                                         | -1.44 | 0.705 | -1.2  | 0.429 | -1.08 | 0.698 | -1.03 | 0.822 | -1.18 |
| 1450366_at   | Hrk               | harakiri, BCL2 interacting protein (contains only BH3 domain)                      | -1.44 | 0.589 | -1.02 | 0.918 | -1.27 | 0.205 | -1.53 | 0.553 | -1.32 |
| 1442663_at   | ---               | ---                                                                                | -1.12 | 0.098 | -1.27 | 0.388 | -1.29 | 0.334 | -1.27 | 0.27  | -1.24 |
| 1423903_at   | Pvr               | poliovirus receptor                                                                | -1.32 | 0.006 | -1.42 | 0.003 | -1    | 0.985 | -1.16 | 0.265 | -1.23 |
| 1457717_at   | AI987986          | expressed sequence AI987986                                                        | -1.27 | 0.09  | -1.04 | 0.802 | -1.41 | 0.067 | -1.63 | 0.26  | -1.34 |
| 1441346_at   | 2810421E14Rik     | RIKEN cDNA 2810421E14 gene                                                         | -1.15 | 0.688 | -1.46 | 0.387 | -1.1  | 0.574 | -1.57 | 0.031 | -1.32 |
| 1423470_at   | Ptbp2             | polypyrimidine tract binding protein 2                                             | -1.13 | 0.644 | -1.37 | 0.009 | -1.18 | 0.338 | -1.39 | 0.336 | -1.27 |
| 1458136_at   | Msi2              | Musashi homolog 2 (Drosophila)                                                     | -1.5  | 0.11  | -1.1  | 0.723 | -1.13 | 0.537 | -1.09 | 0.692 | -1.21 |
| 1454980_at   | 4930402E16Rik     | RIKEN cDNA 4930402E16 gene                                                         | -1.16 | 0.184 | -1.32 | 0.144 | -1.19 | 0.24  | -1.37 | 0.235 | -1.26 |
| 1441402_at   | LOC674229         | similar to cysteine and glycine-rich protein 2 binding protein                     | -1.21 | 0.489 | -1.48 | 0.081 | -1.04 | 0.916 | -1.25 | 0.187 | -1.25 |
| 1455564_at   | Bcr               | breakpoint cluster region homolog                                                  | -1.29 | 0.071 | -1.1  | 0.303 | -1.29 | 0.312 | -1.12 | 0.064 | -1.2  |
| 1423432_at   | Phip              | pleckstrin homology domain interacting protein                                     | -1.17 | 0.398 | -1.14 | 0.407 | -1.38 | 0.148 | -1.42 | 0.174 | -1.28 |
| 1460579_at   | Dnpep             | aspartyl aminopeptidase                                                            | -1.32 | 0.586 | -1.1  | 0.397 | -1.26 | 0.422 | -1.31 | 0.125 | -1.25 |
| 1451732_at   | Prpf4b            | PRP4 pre-mRNA processing factor 4 homolog B (yeast)                                | -1.12 | 0.47  | -1.44 | 0.049 | -1.14 | 0.3   | -1.26 | 0.363 | -1.24 |
| 1460425_at   | 1700001C19Rik     | RIKEN cDNA 1700001C19 gene                                                         | -1.66 | 0.003 | -1.12 | 0.062 | -1.04 | 0.871 | -1.22 | 0.152 | -1.26 |
| 1443052_at   | C330019L16Rik     | RIKEN cDNA C330019L16 gene                                                         | -1.58 | 0.15  | -1.12 | 0.73  | -1.07 | 0.697 | -1.35 | 0.472 | -1.28 |
| 1416320_at   | Sec22a            | SEC22 vesicle trafficking protein-like A (S. cerevisiae)                           | -1.19 | 0.001 | -1.11 | 0.464 | -1.39 | 0.031 | -1.16 | 0.257 | -1.21 |
| 1438895_at   | A430102J17Rik     | RIKEN cDNA A430102J17 gene                                                         | -1.18 | 0.217 | -1.19 | 0.193 | -1.3  | 0.212 | -1.15 | 0.068 | -1.2  |
| 1435595_at   | 1810011O10Rik     | RIKEN cDNA 1810011O10 gene                                                         | -1.26 | 0.425 | -1.19 | 0.43  | -1.21 | 0.165 | -1.58 | 0.205 | -1.31 |
| 1436001_at   | 2310028O11Rik     | RIKEN cDNA 2310028O11 gene                                                         | -1.35 | 0.11  | -1.07 | 0.774 | -1.27 | 0.043 | -1.34 | 0.119 | -1.26 |
| 1428593_at   | 1700029F09Rik     | RIKEN cDNA 1700029F09 gene                                                         | -1.22 | 0.126 | -1.26 | 0.018 | -1.18 | 0.166 | -1    | 0.986 | -1.17 |
| 1457464_at   | C130015C19        | hypothetical LOC403342                                                             | -1.05 | 0.855 | -1.36 | 0.01  | -1.3  | 0.299 | -1.71 | 0.041 | -1.35 |
| 1434632_at   | ---               | Transcribed locus                                                                  | -1.19 | 0.325 | -1.18 | 0.524 | -1.29 | 0.364 | -1.43 | 0.233 | -1.27 |
| 1418582_at   | Cbfa2t3h          | core-binding factor, runt domain, alpha subunit 2, translocated to, 3 homolog (hur | -1.23 | 0.106 | -1.4  | 0.121 | -1.07 | 0.784 | -1.15 | 0.275 | -1.21 |
| 1453171_s_at | Ppm1a             | protein phosphatase 1A, magnesium dependent, alpha isoform                         | -1.03 | 0.566 | -1.22 | 0.064 | -1.49 | 0.034 | -1.04 | 0.476 | -1.2  |
| 1441077_at   | AW124847          | expressed sequence AW124847                                                        | -1.5  | 0.179 | -1.14 | 0.455 | -1.09 | 0.855 | -1.47 | 0.097 | -1.3  |
| 1454166_at   | 1700040N02Rik     | RIKEN cDNA 1700040N02 gene                                                         | -1.23 | 0.335 | -1.24 | 0.071 | -1.19 | 0.464 | -1.61 | 0.415 | -1.32 |
| 1441318_at   | Jarid1a           | jumonji, AT rich interactive domain 1A (Rbp2 like)                                 | -1.46 | 0.037 | -1.04 | 0.924 | -1.22 | 0.253 | -1.25 | 0.377 | -1.25 |
| 1456663_x_at | Tm2d2             | TM2 domain containing 2                                                            | -1    | 0.97  | -1.34 | 0.126 | -1.39 | 0.021 | -1.36 | 0.091 | -1.27 |
| 1457528_at   | Slc4a7            | solute carrier family 4, sodium bicarbonate cotransporter, member 7                | -1.15 | 0.705 | -1.18 | 0.217 | -1.35 | 0.148 | -2.49 | 0.129 | -1.54 |
| 1431594_at   | Dpp3              | dipeptidylpeptidase 3                                                              | -1.02 | 0.969 | -1.38 | 0.652 | -1.32 | 0.566 | -1.7  | 0.004 | -1.36 |
| 1422109_at   | Rfx1              | regulatory factor X, 1 (influences HLA class II expression)                        | -1.36 | 0.125 | -1.25 | 0.56  | -1.08 | 0.735 | -1.73 | 0.087 | -1.35 |
| 1435695_a_at | A030007L17Rik     | RIKEN cDNA A030007L17 gene                                                         | -1.37 | 0.13  | -1.21 | 0.3   | -1.11 | 0.103 | -2.23 | 0.064 | -1.48 |
| 1453596_at   | Id2               | inhibitor of DNA binding 2                                                         | -1.23 | 0.597 | -1.45 | 0.371 | -1.04 | 0.747 | -1.22 | 0.338 | -1.24 |
| 1418801_at   | Zkscan1           | zinc finger with KRAB and SCAN domains 1                                           | -1.15 | 0.184 | -1.21 | 0.146 | -1.3  | 0.208 | -1.06 | 0.76  | -1.18 |
| 1443339_at   | 2310056P07Rik     | RIKEN cDNA 2310056P07 gene                                                         | -1.04 | 0.917 | -1.76 | 0.037 | -1.07 | 0.882 | -1.63 | 0.262 | -1.38 |
| 1459731_at   | ---               | ---                                                                                | -1.19 | 0.826 | -1.21 | 0.608 | -1.26 | 0.463 | -1.58 | 0.539 | -1.31 |
| 1422322_at   | Chml              | choroideremia-like                                                                 | -1.38 | 0.548 | -1.13 | 0.705 | -1.17 | 0.655 | -1.6  | 0.192 | -1.32 |
| 1441371_at   | Plxna4            | plexin A4                                                                          | -1.08 | 0.769 | -1.33 | 0.01  | -1.28 | 0.09  | -1.07 | 0.566 | -1.19 |
| 1438405_at   | Fgf7              | fibroblast growth factor 7                                                         | -1.12 | 0.505 | -1.37 | 0.538 | -1.19 | 0.014 | -1.07 | 0.686 | -1.19 |
| 1449472_at   | Gpr12             | G-protein coupled receptor 12                                                      | -1.08 | 0.881 | -1.81 | 0.236 | -1.02 | 0.867 | -1.26 | 0.181 | -1.29 |
| 1448521_at   | Brd7 /// LOC63432 | bromodomain containing 7 /// similar to bromodomain containing 7                   | -1.13 | 0.496 | -1.32 | 0.087 | -1.23 | 0.18  | -1.36 | 0.069 | -1.26 |
| 1432224_at   | 4831407H17Rik     | RIKEN cDNA 4831407H17 gene                                                         | -1.06 | 0.852 | -1.4  | 0.045 | -1.24 | 0.29  | -1.21 | 0.517 | -1.23 |
| 1452759_s_at | Ppfbp1            | PTPRF interacting protein, binding protein 1 (liprin beta 1)                       | -1.05 | 0.36  | -1.16 | 0.251 | -1.55 | 0.03  | -1.6  | 0.056 | -1.34 |
| 1446511_at   | Msh3              | mutS homolog 3 (E. coli)                                                           | -1.24 | 0.426 | -1.06 | 0.631 | -1.41 | 0.194 | -1.37 | 0.379 | -1.27 |
| 1455113_at   | Armc8             | armadillo repeat containing 8                                                      | -1.21 | 0.149 | -1.18 | 0.12  | -1.26 | 0.175 | -1.06 | 0.514 | -1.18 |

|              |                    |                                                                                      |       |       |       |       |       |       |       |       |       |
|--------------|--------------------|--------------------------------------------------------------------------------------|-------|-------|-------|-------|-------|-------|-------|-------|-------|
| 1420209_at   | Dus4l              | Dihydrouridine synthase 4-like (S. cerevisiae)                                       | -1.34 | 0.423 | -1.28 | 0.404 | -1.07 | 0.728 | -2.21 | 0.487 | -1.47 |
| 1448203_at   | Atp5l              | ATP synthase, H+ transporting, mitochondrial F0 complex, subunit g                   | -1.24 | 0.02  | -1.23 | 0.043 | -1.18 | 0.013 | -1.14 | 0.352 | -1.2  |
| 1459835_s_at | Dnaja1             | DnaJ (Hsp40) homolog, subfamily A, member 1                                          | -1.24 | 0.294 | -1.13 | 0.302 | -1.29 | 0.001 | -1.68 | 0.327 | -1.34 |
| 1419765_at   | Cul2               | cullin 2                                                                             | -1.01 | 0.924 | -1.24 | 0.515 | -1.51 | 0.302 | -1.59 | 0.125 | -1.34 |
| 1435608_at   | Znrf3 /// LOC63180 | zinc and ring finger 3 /// similar to Goliath homolog precursor (Ring finger protein | -1.12 | 0.351 | -1.4  | 0.204 | -1.17 | 0.492 | -1.02 | 0.609 | -1.18 |
| 1424333_at   | Rg9mtd1            | RNA (guanine-9-) methyltransferase domain containing 1                               | -1.13 | 0.455 | -1.3  | 0.112 | -1.24 | 0.026 | -1.22 | 0.356 | -1.22 |
| 1456234_at   | Limk1              | LIM-domain containing, protein kinase                                                | -1.22 | 0.153 | -1.34 | 0.237 | -1.12 | 0.543 | -1.29 | 0.268 | -1.24 |
| 1442164_at   | Blzf1              | basic leucine zipper nuclear factor 1                                                | -1.06 | 0.772 | -1.07 | 0.87  | -1.7  | 0.032 | -1.29 | 0.238 | -1.28 |
| 1441946_at   | Itih5              | inter-alpha (globulin) inhibitor H5                                                  | -1.23 | 0.118 | -1.44 | 0.298 | -1.05 | 0.808 | -3.69 | 0.057 | -1.85 |
| 1426259_at   | Pank3              | pantothenate kinase 3                                                                | -1.01 | 0.937 | -1.15 | 0.389 | -1.66 | 0.044 | -1.05 | 0.827 | -1.22 |
| 1455831_at   | Fus                | fusion, derived from t(12;16) malignant liposarcoma (human)                          | -1.47 | 0.497 | -1.08 | 0.815 | -1.17 | 0.178 | -1.35 | 0.136 | -1.27 |
| 1449075_at   | Exdl2              | exonuclease 3"-5" domain-like 2                                                      | -1.16 | 0.303 | -1.33 | 0.089 | -1.18 | 0.396 | -1    | 0.987 | -1.17 |
| 1438678_at   | 1500011K16Rik      | RIKEN cDNA 1500011K16 gene                                                           | -1.3  | 0.142 | -1.17 | 0.187 | -1.19 | 0.053 | -1.36 | 0.245 | -1.25 |
| 1458281_at   | Ar5b               | Arylsulfatase B                                                                      | -1.22 | 0.277 | -1.28 | 0.579 | -1.16 | 0.121 | -1.96 | 0.043 | -1.4  |
| 1452596_at   | Polr2k             | polymerase (RNA) II (DNA directed) polypeptide K                                     | -1.08 | 0.733 | -1.25 | 0.342 | -1.36 | 0.001 | -1.25 | 0.314 | -1.24 |
| 1441099_at   | Plekhg3            | Pleckstrin homology domain containing, family G (with RhoGef domain) member          | -1.22 | 0.761 | -1.2  | 0.232 | -1.23 | 0.308 | -1.03 | 0.922 | -1.17 |
| 1428474_at   | Ppp3cb             | protein phosphatase 3, catalytic subunit, beta isoform                               | -1.12 | 0.777 | -1.24 | 0.202 | -1.31 | 0.014 | -1.14 | 0.251 | -1.2  |
| 1434834_at   | Socs7              | suppressor of cytokine signaling 7                                                   | -1.23 | 0.166 | -1.53 | 0.05  | -1    | 0.989 | -1.26 | 0.11  | -1.25 |
| 1419204_at   | Dll1               | delta-like 1 (Drosophila)                                                            | -1.47 | 0.171 | -1.25 | 0.334 | -1.01 | 0.97  | -1.48 | 0.155 | -1.3  |
| 1453583_at   | Zzef1              | zinc finger, ZZ-type with EF hand domain 1                                           | -1.27 | 0.26  | -1.03 | 0.794 | -1.4  | 0.089 | -1.32 | 0.184 | -1.26 |
| 1454132_at   | 7630402F16Rik      | RIKEN cDNA 7630402F16 gene                                                           | -1.11 | 0.873 | -1.06 | 0.802 | -1.6  | 0.433 | -1.24 | 0.776 | -1.25 |
| 1434194_at   | Mtap2              | microtubule-associated protein 2                                                     | -1.44 | 0.007 | -1.08 | 0.911 | -1.19 | 0.418 | -1.97 | 0.036 | -1.42 |
| 1456282_at   | ---                | CDNA clone IMAGE:30014192                                                            | -1.02 | 0.88  | -1.44 | 0.256 | -1.26 | 0.408 | -1.42 | 0.113 | -1.29 |
| 1435239_at   | Gria1              | glutamate receptor, ionotropic, AMPA1 (alpha 1)                                      | -1.13 | 0.803 | -1.64 | 0.458 | -1.03 | 0.861 | -1.04 | 0.834 | -1.21 |
| 1440719_at   | Gle1l              | GLE1 RNA export mediator-like (yeast                                                 | -1.07 | 0.803 | -1.2  | 0.444 | -1.43 | 0.249 | -1.79 | 0.036 | -1.37 |
| 1454554_at   | 9330159N22Rik      | RIKEN cDNA 9330159N22 gene                                                           | -1.32 | 0.62  | -1.29 | 0.603 | -1.07 | 0.733 | -1.22 | 0.768 | -1.22 |
| 1439817_at   | 2900064A13Rik      | RIKEN cDNA 2900064A13 gene                                                           | -1.21 | 0.034 | -1.1  | 0.381 | -1.37 | 0.143 | -1.34 | 0.388 | -1.25 |
| 1429624_at   | Sltm               | SAFB-like, transcription modulator                                                   | -1.23 | 0.288 | -1.14 | 0.506 | -1.29 | 0.093 | -1.34 | 0.291 | -1.25 |
| 1437182_at   | Dido1              | death inducer-oblierator 1                                                           | -1.13 | 0.375 | -1.19 | 0.358 | -1.34 | 0.098 | -1.58 | 0.101 | -1.31 |
| 1436157_at   | Ccar1              | cell division cycle and apoptosis regulator 1                                        | -1.19 | 0.487 | -1.1  | 0.188 | -1.39 | 0.043 | -1.02 | 0.909 | -1.17 |
| 1419575_s_at | Zfp292             | zinc finger protein 292                                                              | -1.21 | 0.201 | -1.01 | 0.939 | -1.53 | 0.101 | -1.39 | 0.205 | -1.29 |
| 1434105_at   | Epm2aip1           | EPM2A (laforin) interacting protein 1                                                | -1.1  | 0.228 | -1.2  | 0.116 | -1.37 | 0.172 | -1.19 | 0.469 | -1.22 |
| 1442656_at   | ---                | ---                                                                                  | -1.13 | 0.771 | -1.24 | 0.231 | -1.29 | 0.588 | -1.01 | 0.959 | -1.17 |
| 1424546_at   | BC003965           | cDNA sequence BC003965                                                               | -1.14 | 0.631 | -1.49 | 0.14  | -1.09 | 0.275 | -1.02 | 0.9   | -1.18 |
| 1418664_at   | Mpdz               | multiple PDZ domain protein                                                          | -1.2  | 0.595 | -1.26 | 0.106 | -1.19 | 0.524 | -1.61 | 0.032 | -1.31 |
| 1416630_at   | Id3                | inhibitor of DNA binding 3                                                           | -1.46 | 0.132 | -1.06 | 0.806 | -1.19 | 0.436 | -2.42 | 0.047 | -1.53 |
| 1445862_at   | 4921513D23Rik      | RIKEN cDNA 4921513D23 gene                                                           | -1.15 | 0.119 | -1.02 | 0.755 | -1.6  | 0.072 | -1.32 | 0.237 | -1.28 |
| 1459517_at   | Cdc14a             | CDC14 cell division cycle 14 homolog A (S. cerevisiae)                               | -1.32 | 0.56  | -1.02 | 0.961 | -1.37 | 0.137 | -1.13 | 0.678 | -1.21 |
| 1452799_at   | 2310009E04Rik      | RIKEN cDNA 2310009E04 gene                                                           | -1.2  | 0.138 | -1.15 | 0.015 | -1.3  | 0.042 | -1.17 | 0.668 | -1.2  |
| 1428257_s_at | Dynlrb1            | dynein light chain roadblock-type 1                                                  | -1.14 | 0.194 | -1.2  | 0.003 | -1.31 | 0.044 | -1.39 | 0.15  | -1.26 |
| 1457303_at   | Anks3              | Ankyrin repeat and sterile alpha motif domain containing 3                           | -1.24 | 0.274 | -1.17 | 0.592 | -1.24 | 0.128 | -1.5  | 0.299 | -1.29 |
| 1456855_at   | ---                | ---                                                                                  | -1.32 | 0.485 | -1.06 | 0.226 | -1.3  | 0.235 | -1.2  | 0.422 | -1.22 |
| 1437490_x_at | Uap1 /// LOC64050  | UDP-N-acetylglucosamine pyrophosphorylase 1 /// similar to UDP-N-acetylhexos-        | -1.17 | 0.492 | -1.21 | 0.124 | -1.27 | 0.042 | -1.21 | 0.349 | -1.21 |
| 1435283_s_at | Gm967              | gene model 967, (NCBI)                                                               | -1.03 | 0.854 | -1.45 | 0.158 | -1.24 | 0.198 | -1.09 | 0.637 | -1.2  |
| 1456662_at   | LOC546058          | Hypothetical protein LOC546058                                                       | -1.15 | 0.55  | -1.04 | 0.865 | -1.56 | 0.039 | -1.61 | 0.083 | -1.34 |
| 1444237_at   | C330019G07Rik      | RIKEN cDNA C330019G07 gene                                                           | -1.19 | 0.542 | -1.11 | 0.382 | -1.37 | 0.011 | -1.15 | 0.357 | -1.2  |
| 1449108_at   | Fdx1               | ferredoxin 1                                                                         | -1.07 | 0.429 | -1.2  | 0.208 | -1.43 | 0.065 | -1.43 | 0.144 | -1.28 |
| 1457785_at   | Zswim3             | Zinc finger, SWIM domain containing 3                                                | -1.31 | 0.619 | -1.12 | 0.832 | -1.23 | 0.549 | -1.29 | 0.685 | -1.24 |
| 1446166_at   | ---                | ---                                                                                  | -1.03 | 0.755 | -1.86 | 0.193 | -1.04 | 0.812 | -1.14 | 0.851 | -1.27 |
| 1457129_at   | Zfp458             | Zinc finger protein 458                                                              | -1.45 | 0.348 | -1.02 | 0.926 | -1.25 | 0.019 | -1.19 | 0.61  | -1.23 |
| 1443115_at   | Tgfr2              | Transforming growth factor, beta receptor II                                         | -1.12 | 0.737 | -1.13 | 0.798 | -1.46 | 0.252 | -1.88 | 0.146 | -1.39 |
| 1443464_at   | Sntb1              | Syntrophin, basic 1                                                                  | -1.11 | 0.742 | -1.18 | 0.693 | -1.38 | 0.258 | -1.67 | 0.374 | -1.34 |
| 1443099_at   | BC087945           | CDNA sequence BC087945                                                               | -1.22 | 0.666 | -1.36 | 0.367 | -1.09 | 0.644 | -1.11 | 0.462 | -1.2  |

|              |                   |                                                                                   |       |       |       |       |       |       |       |       |       |
|--------------|-------------------|-----------------------------------------------------------------------------------|-------|-------|-------|-------|-------|-------|-------|-------|-------|
| 1455196_s_at | AA987161          | expressed sequence AA987161                                                       | -1.3  | 0.445 | -1.11 | 0.599 | -1.25 | 0.205 | -1.41 | 0.2   | -1.27 |
| 1417254_at   | Spata5            | spermatogenesis associated 5                                                      | -1.35 | 0.073 | -1.21 | 0.287 | -1.11 | 0.407 | -1.5  | 0.186 | -1.29 |
| 1438110_at   | Zbtb1             | Zinc finger and BTB domain containing 1                                           | -1.05 | 0.893 | -1.39 | 0.352 | -1.25 | 0.364 | -1.23 | 0.355 | -1.23 |
| 1453134_at   | Pik3ca            | phosphatidylinositol 3-kinase, catalytic, alpha polypeptide                       | -1.04 | 0.915 | -1.1  | 0.585 | -1.66 | 0.007 | -1.67 | 0.039 | -1.37 |
| 1439940_at   | 2900019G14Rik     | RIKEN cDNA 2900019G14 gene                                                        | -1.63 | 0.468 | -1.16 | 0.522 | -1.01 | 0.985 | -1.2  | 0.706 | -1.25 |
| 1427158_at   | Mrps30            | mitochondrial ribosomal protein S30                                               | -1.3  | 0.059 | -1.27 | 0.009 | -1.09 | 0.527 | -1.11 | 0.382 | -1.19 |
| 1445959_at   | ---               | ---                                                                               | -1.05 | 0.782 | -1.27 | 0.274 | -1.36 | 0.668 | -1.75 | 0.616 | -1.36 |
| 1443643_at   | ---               | ---                                                                               | -1.45 | 0.467 | -1.09 | 0.838 | -1.16 | 0.459 | -1.13 | 0.802 | -1.21 |
| 1452854_at   | ---               | ---                                                                               | -1.08 | 0.224 | -1.2  | 0.029 | -1.41 | 0.128 | -1.65 | 0.259 | -1.33 |
| 1440736_at   | AI131651          | expressed sequence AI131651                                                       | -1.22 | 0.021 | -1.03 | 0.884 | -1.47 | 0.057 | -1.61 | 0.112 | -1.33 |
| 1459154_at   | ---               | Transcribed locus                                                                 | -1.21 | 0.568 | -1.06 | 0.852 | -1.43 | 0.35  | -1.47 | 0.153 | -1.29 |
| 1420593_a_at | Tead3             | TEA domain family member 3                                                        | -1.39 | 0.172 | -1.07 | 0.762 | -1.23 | 0.458 | -1.06 | 0.841 | -1.19 |
| 1429625_at   | 2900054C01Rik     | RIKEN cDNA 2900054C01 gene                                                        | -1.1  | 0.28  | -1.04 | 0.77  | -1.65 | 0.011 | -1.28 | 0.389 | -1.27 |
| 1452774_at   | Hnrpa3            | heterogeneous nuclear ribonucleoprotein A3                                        | -1.07 | 0.741 | -1.31 | 0.084 | -1.29 | 0.19  | -1.39 | 0.136 | -1.26 |
| 1445529_at   | ---               | ---                                                                               | -1.03 | 0.857 | -1.51 | 0.373 | -1.19 | 0.689 | -1.26 | 0.667 | -1.25 |
| 1434207_at   | 2900057K09Rik     | RIKEN cDNA 2900057K09 gene                                                        | -1.19 | 0.579 | -1.15 | 0.447 | -1.31 | 0.223 | -1.55 | 0.097 | -1.3  |
| 1440607_at   | Ches1             | Checkpoint suppressor 1                                                           | -1.06 | 0.63  | -1.3  | 0.169 | -1.31 | 0.511 | -1.72 | 0.162 | -1.35 |
| 1453302_at   | Tmem81            | transmembrane protein 81                                                          | -1.01 | 0.965 | -1.99 | 0.16  | -1.02 | 0.928 | -1.34 | 0.12  | -1.34 |
| 1446195_at   | LOC632689         | similar to WD repeat and SOCS box containing protein 2 (WSB-2) (SOCS box-co       | -1.45 | 0.636 | -1.02 | 0.954 | -1.25 | 0.693 | -1.06 | 0.234 | -1.19 |
| 1418301_at   | Irf6              | interferon regulatory factor 6                                                    | -1.15 | 0.317 | -1.18 | 0.299 | -1.31 | 0.19  | -1.76 | 0.216 | -1.35 |
| 1460017_at   | LOC434179         | hypothetical LOC434179                                                            | -1.29 | 0.246 | -1.02 | 0.919 | -1.39 | 0.207 | -1.54 | 0.164 | -1.31 |
| 1448136_at   | Enpp2             | ectonucleotide pyrophosphatase/phosphodiesterase 2                                | -1.24 | 0.229 | -1.13 | 0.22  | -1.28 | 0.237 | -1.51 | 0.425 | -1.29 |
| 1432974_at   | 4933421H12Rik     | RIKEN cDNA 4933421H12 gene                                                        | -1.09 | 0.706 | -1.21 | 0.77  | -1.37 | 0.579 | -1.7  | 0.393 | -1.34 |
| 1438961_s_at | Blimh             | bleomycin hydrolase                                                               | -1.19 | 0.322 | -1.19 | 0.047 | -1.27 | 0.044 | -1.49 | 0.034 | -1.28 |
| 1439090_at   | D030022P07Rik     | RIKEN cDNA D030022P07 gene                                                        | -1.15 | 0.003 | -1.11 | 0.436 | -1.42 | 0.149 | -1.63 | 0.082 | -1.33 |
| 1458228_at   | Opclm             | Opioid binding protein/cell adhesion molecule-like                                | -1.48 | 0.295 | -1.14 | 0.25  | -1.08 | 0.82  | -1.58 | 0.508 | -1.32 |
| 1452158_at   | Eprs /// LOC63367 | glutamyl-prolyl-tRNA synthetase /// similar to Bifunctional aminoacyl-tRNA synthe | -1.28 | 0.161 | -1.03 | 0.802 | -1.39 | 0.08  | -1.05 | 0.853 | -1.18 |
| 1452107_s_at | Npnt              | Nephronectin                                                                      | -1.09 | 0.535 | -1.13 | 0.85  | -1.48 | 0.253 | -2.1  | 0.157 | -1.45 |
| 1454449_at   | Rabepk            | Rab9 effector protein with kelch motifs                                           | -1.11 | 0.592 | -1.19 | 0.699 | -1.37 | 0.029 | -1.07 | 0.839 | -1.18 |
| 1416766_at   | Mosc2             | MOCO sulphurase C-terminal domain containing 2                                    | -1.04 | 0.702 | -1.36 | 0.126 | -1.28 | 0.059 | -1.17 | 0.228 | -1.21 |
| 1446284_at   | Mtss1             | metastasis suppressor 1                                                           | -1.09 | 0.804 | -1.09 | 0.777 | -1.55 | 0.39  | -2.17 | 0.132 | -1.48 |
| 1445490_at   | C77805            | expressed sequence C77805                                                         | -1.19 | 0.59  | -1.03 | 0.915 | -1.5  | 0.154 | -1.77 | 0.053 | -1.37 |
| 1446621_at   | Chd7              | Chromodomain helicase DNA binding protein 7                                       | -1.03 | 0.941 | -1.36 | 0.441 | -1.31 | 0.077 | -1.88 | 0.097 | -1.39 |
| 1435614_s_at | Rasgrf1           | RAS protein-specific guanine nucleotide-releasing factor 1                        | -1.56 | 0.479 | -1.02 | 0.895 | -1.17 | 0.474 | -1    | 0.993 | -1.19 |
| 1439388_s_at | Bcar1             | breast cancer anti-estrogen resistance 1                                          | -1.09 | 0.42  | -1.22 | 0.23  | -1.35 | 0.121 | -1.35 | 0.379 | -1.25 |
| 1457522_at   | 1110034C04Rik     | RIKEN cDNA 1110034C04 gene                                                        | -1.09 | 0.286 | -1.25 | 0.271 | -1.33 | 0.36  | -1.33 | 0.223 | -1.25 |
| 1456856_at   | Ppfia2            | protein tyrosine phosphatase, receptor type, f polypeptide (PTPRF), interacting p | -1.2  | 0.685 | -1.34 | 0.353 | -1.12 | 0.751 | -1.22 | 0.535 | -1.22 |
| 1457503_at   | 2310035C23Rik     | RIKEN cDNA 2310035C23 gene                                                        | -1.26 | 0.124 | -1.15 | 0.542 | -1.22 | 0.17  | -1.68 | 0.057 | -1.33 |
| 1441010_at   | ---               | Adult male vesicular gland cDNA, RIKEN full-length enriched library, clone:G630(  | -1.3  | 0.039 | -1.02 | 0.966 | -1.37 | 0.328 | -1.1  | 0.76  | -1.2  |
| 1430335_a_at | Pax3              | paired box gene 3                                                                 | -1.09 | 0.867 | -1.68 | 0.378 | -1.04 | 0.946 | -1.02 | 0.946 | -1.21 |
| 1432312_a_at | 4931440B09Rik     | RIKEN cDNA 4931440B09 gene                                                        | -1.26 | 0.051 | -1.18 | 0.75  | -1.2  | 0.705 | -1.29 | 0.215 | -1.23 |
| 1433951_at   | Arl5a             | ADP-ribosylation factor-like 5A                                                   | -1.06 | 0.474 | -1.2  | 0.004 | -1.42 | 0.042 | -1.47 | 0.148 | -1.29 |
| 1456516_x_at | Uap1 /// LOC64050 | UDP-N-acetylglucosamine pyrophosphorylase 1 /// similar to UDP-N-acetylhexos      | -1.25 | 0.468 | -1.15 | 0.167 | -1.24 | 0.007 | -1.34 | 0.186 | -1.24 |
| 1426147_s_at | Cldn10            | claudin 10                                                                        | -1.25 | 0.112 | -1.32 | 0.693 | -1.09 | 0.748 | -1.47 | 0.005 | -1.28 |
| 1431023_at   | C030046E11Rik     | RIKEN cDNA C030046E11 gene                                                        | -1.06 | 0.861 | -1.36 | 0.634 | -1.25 | 0.447 | -1.72 | 0.302 | -1.35 |
| 1444806_at   | 6720456B07Rik     | RIKEN cDNA 6720456B07 gene                                                        | -1.22 | 0.563 | -1.07 | 0.785 | -1.39 | 0.1   | -1.42 | 0.13  | -1.27 |
| 1426807_at   | Lta4h             | Leukotriene A4 hydrolase                                                          | -1.12 | 0.129 | -1.16 | 0.519 | -1.39 | 0.131 | -1.11 | 0.694 | -1.19 |
| 1429480_at   | 1700011N24Rik     | RIKEN cDNA 1700011N24 gene                                                        | -1.09 | 0.845 | -1.5  | 0.071 | -1.12 | 0.435 | -2.22 | 0.301 | -1.48 |
| 1457938_at   | Ncor1             | Nuclear receptor co-repressor 1                                                   | -1.44 | 0.39  | -1.02 | 0.92  | -1.25 | 0.356 | -1.47 | 0.211 | -1.29 |
| 1431913_a_at | Pde3a             | phosphodiesterase 3A, cGMP inhibited                                              | -1.02 | 0.971 | -1.64 | 0.456 | -1.13 | 0.801 | -1.26 | 0.027 | -1.26 |
| 1435157_at   | 5830454D03Rik     | RIKEN cDNA 5830454D03 gene                                                        | -1.29 | 0.183 | -1.16 | 0.211 | -1.19 | 0.293 | -1.06 | 0.85  | -1.17 |
| 1420996_at   | Plxna3            | plexin A3                                                                         | -1.61 | 0.048 | -1.07 | 0.725 | -1.08 | 0.339 | -1.15 | 0.048 | -1.23 |
| 1424632_a_at | Rev3l             | REV3-like, catalytic subunit of DNA polymerase zeta RAD54 like (S. cerevisiae)    | -1.22 | 0.393 | -1.15 | 0.189 | -1.27 | 0.023 | -1.18 | 0.228 | -1.21 |

|              |               |                                                                                |       |       |       |       |       |       |       |       |       |
|--------------|---------------|--------------------------------------------------------------------------------|-------|-------|-------|-------|-------|-------|-------|-------|-------|
| 1440317_at   | C130068B02Rik | RIKEN cDNA C130068B02 gene                                                     | -1.15 | 0.355 | -1.01 | 0.941 | -1.63 | 0.113 | -1.34 | 0.157 | -1.28 |
| 1430808_at   | Tbc1d5        | TBC1 domain family, member 5                                                   | -1.02 | 0.943 | -1.45 | 0.013 | -1.24 | 0.266 | -1.53 | 0.248 | -1.31 |
| 1436775_a_at | Ankrd17       | ankyrin repeat domain 17                                                       | -1.16 | 0.412 | -1.16 | 0.097 | -1.33 | 0.092 | -1.45 | 0.028 | -1.27 |
| 1455676_x_at | Tial1         | Tial1 cytotoxic granule-associated RNA binding protein-like 1                  | -1.36 | 0.081 | -1.08 | 0.588 | -1.22 | 0.367 | -1.01 | 0.921 | -1.17 |
| 1458292_at   | Pasma1        | proteasome (prosome, macropain) subunit, alpha type 1                          | -1.08 | 0.759 | -1.47 | 0.183 | -1.15 | 0.123 | -1.16 | 0.271 | -1.21 |
| 1459981_s_at | Rsnb1         | rosbin, round spermatid basic protein 1                                        | -1.24 | 0.451 | -1.14 | 0.504 | -1.26 | 0.126 | -1.28 | 0.058 | -1.23 |
| 1415785_a_at | Cct8          | chaperonin subunit 8 (theta)                                                   | -1.27 | 0.167 | -1.14 | 0.086 | -1.23 | 0.053 | -1.11 | 0.324 | -1.19 |
| 1445042_at   | Aass          | Aminoadipate-semialdehyde synthase                                             | -1.09 | 0.008 | -1.59 | 0.386 | -1.07 | 0.853 | -1.22 | 0.668 | -1.24 |
| 1428729_at   | Krit1         | KRIT1, ankyrin repeat containing                                               | -1.21 | 0.004 | -1.15 | 0.275 | -1.27 | 0.333 | -1.23 | 0.347 | -1.22 |
| 1434966_at   | Sfrs8         | splicing factor, arginine/serine-rich 8                                        | -1.16 | 0.431 | -1.46 | 0.063 | -1.08 | 0.221 | -1.31 | 0.256 | -1.25 |
| 1440856_at   | Mapk8         | mitogen activated protein kinase 8                                             | -1.16 | 0.087 | -1.12 | 0.289 | -1.38 | 0.058 | -1.32 | 0.256 | -1.25 |
| 1433937_at   | Trp53bp2      | transformation related protein 53 binding protein 2                            | -1.38 | 0.352 | -1.26 | 0.247 | -1.04 | 0.597 | -1.4  | 0.229 | -1.27 |
| 1428210_s_at | Chuk          | conserved helix-loop-helix ubiquitous kinase                                   | -1.3  | 0.069 | -1.15 | 0.308 | -1.18 | 0.313 | -1.63 | 0.06  | -1.32 |
| 1442585_at   | B230220N19Rik | RIKEN cDNA B230220N19 gene                                                     | -1.42 | 0.326 | -1.12 | 0.843 | -1.14 | 0.61  | -1    | 0.989 | -1.17 |
| 1419972_at   | Slc35a5       | Solute carrier family 35, member A5                                            | -1.02 | 0.914 | -1.31 | 0.55  | -1.35 | 0.213 | -1.58 | 0.399 | -1.32 |
| 1416547_at   | Ndufb3        | NADH dehydrogenase (ubiquinone) 1 beta subcomplex 3                            | -1.14 | 0.257 | -1.22 | 0.065 | -1.28 | 0.042 | -1.23 | 0.072 | -1.22 |
| 1428226_at   | Ngdn          | neuroguidin, EIF4E binding protein                                             | -1.07 | 0.14  | -1.35 | 0.065 | -1.24 | 0.071 | -1.38 | 0.017 | -1.26 |
| 1419778_at   | ---           | ---                                                                            | -1.06 | 0.935 | -1.22 | 0.586 | -1.4  | 0.139 | -2.89 | 0.165 | -1.64 |
| 1429779_at   | Eif2c4        | eukaryotic translation initiation factor 2C, 4                                 | -1.32 | 0.453 | -1.11 | 0.258 | -1.22 | 0.349 | -1.37 | 0.385 | -1.25 |
| 1423248_at   | Nktr          | natural killer tumor recognition sequence                                      | -1.18 | 0.366 | -1.1  | 0.368 | -1.38 | 0.216 | -1.25 | 0.446 | -1.23 |
| 1444273_at   | AW555355      | expressed sequence AW555355                                                    | -1.03 | 0.901 | -1.33 | 0.006 | -1.32 | 0.428 | -1.73 | 0.175 | -1.35 |
| 1443065_at   | Rhbdd1        | Rhomboid domain containing 1                                                   | -1.49 | 0.624 | -1.15 | 0.603 | -1.06 | 0.726 | -1.04 | 0.839 | -1.19 |
| 1448803_at   | Golga4        | golgi autoantigen, golgin subfamily a, 4                                       | -1.02 | 0.823 | -1.34 | 0.063 | -1.32 | 0.191 | -1.25 | 0.562 | -1.23 |
| 1441705_at   | AU015680      | expressed sequence AU015680                                                    | -1.17 | 0.693 | -1.25 | 0.619 | -1.21 | 0.596 | -1.91 | 0.116 | -1.39 |
| 1435632_at   | Nufip2        | nuclear fragile X mental retardation protein interacting protein 2             | -1.11 | 0.31  | -1.15 | 0.224 | -1.39 | 0.043 | -1.2  | 0.379 | -1.21 |
| 1428616_at   | Zfp131        | zinc finger protein 131                                                        | -1.03 | 0.833 | -1.21 | 0.072 | -1.45 | 0.004 | -1.12 | 0.104 | -1.2  |
| 1425346_at   | Zfp318        | zinc finger protein 318                                                        | -1.02 | 0.806 | -1.21 | 0.025 | -1.48 | 0.005 | -2.12 | 0.123 | -1.46 |
| 1451234_at   | BC021381      | cDNA sequence BC021381                                                         | -1.09 | 0.416 | -1.18 | 0.275 | -1.38 | 0.159 | -1.29 | 0.457 | -1.24 |
| 1418982_at   | Cebpa         | CCAAT/enhancer binding protein (C/EBP), alpha                                  | -1.4  | 0.29  | -1.09 | 0.747 | -1.18 | 0.424 | -1.21 | 0.427 | -1.22 |
| 1441208_at   | Hdhd2         | Haloacid dehalogenase-like hydrolase domain containing 2                       | -1.13 | 0.491 | -1.26 | 0.255 | -1.25 | 0.228 | -1.28 | 0.249 | -1.23 |
| 1451953_at   | Smr2          | submaxillary gland androgen regulated protein 2                                | -1.4  | 0.294 | -1.06 | 0.93  | -1.22 | 0.736 | -1.13 | 0.772 | -1.2  |
| 1428831_at   | 6230429P13Rik | RIKEN cDNA 6230429P13 gene                                                     | -1.03 | 0.84  | -1.32 | 0.04  | -1.33 | 0.058 | -1.12 | 0.472 | -1.2  |
| 1434999_at   | Suv420h1      | suppressor of variegation 4-20 homolog 1 (Drosophila)                          | -1.11 | 0.536 | -1.15 | 0.38  | -1.41 | 0.036 | -1.49 | 0.086 | -1.29 |
| 1433640_at   | Fubp1         | Far upstream element (FUSE) binding protein 1                                  | -1.37 | 0.312 | -1.2  | 0.563 | -1.09 | 0.6   | -1.26 | 0.37  | -1.23 |
| 1417488_at   | Fosl1         | fos-like antigen 1                                                             | -1.15 | 0.728 | -1.4  | 0.167 | -1.11 | 0.674 | -1.67 | 0.365 | -1.33 |
| 1433888_at   | Atp2b2        | ATPase, Ca++ transporting, plasma membrane 2                                   | -1.46 | 0.305 | -1.18 | 0.711 | -1.06 | 0.805 | -1    | 0.931 | -1.17 |
| 1442089_at   | ---           | ---                                                                            | -1.37 | 0.584 | -1.1  | 0.855 | -1.19 | 0.759 | -2.39 | 0.064 | -1.51 |
| 1454826_at   | Zbtb11        | zinc finger and BTB domain containing 11                                       | -1.27 | 0.28  | -1.21 | 0.152 | -1.15 | 0.14  | -1.32 | 0.07  | -1.24 |
| 1443450_at   | ---           | 7 days neonate cerebellum cDNA, RIKEN full-length enriched library, clone:A730 | -1.29 | 0.621 | -1.22 | 0.668 | -1.12 | 0.761 | -1.2  | 0.498 | -1.21 |
| 1437763_at   | Dcun1d3       | DCN1, defective in cullin neddylation 1, domain containing 3 (S. cerevisiae)   | -1.2  | 0.44  | -1.24 | 0.432 | -1.18 | 0.281 | -1.02 | 0.882 | -1.16 |
| 1419114_at   | Alg14         | asparagine-linked glycosylation 14 homolog (yeast)                             | -1.08 | 0.511 | -1.31 | 0.014 | -1.25 | 0.104 | -1.04 | 0.723 | -1.17 |
| 1430317_at   | Ube2j2        | ubiquitin-conjugating enzyme E2, J2 homolog (yeast)                            | -1.09 | 0.818 | -1.17 | 0.392 | -1.4  | 0.208 | -1.46 | 0.054 | -1.28 |
| 1441604_at   | Esd           | Esterase D/formylglutathione hydrolase                                         | -1.09 | 0.602 | -1.2  | 0.403 | -1.36 | 0.083 | -1.28 | 0.214 | -1.23 |
| 1460625_at   | Gm1568        | gene model 1568, (NCBI)                                                        | -1.24 | 0.799 | -1.27 | 0.607 | -1.12 | 0.78  | -1.42 | 0.251 | -1.26 |
| 1451391_at   | 2700050L05Rik | RIKEN cDNA 2700050L05 gene                                                     | -1.17 | 0.389 | -1.14 | 0.475 | -1.33 | 0.192 | -1.08 | 0.648 | -1.18 |
| 1439826_at   | Hspa14        | heat shock protein 14                                                          | -1.07 | 0.708 | -1.73 | 0.012 | -1.02 | 0.929 | -1.36 | 0.304 | -1.3  |
| 1444560_at   | ---           | Transcribed locus                                                              | -1.13 | 0.497 | -1.39 | 0.154 | -1.14 | 0.287 | -1.27 | 0.372 | -1.23 |
| 1416694_at   | Gk2           | glycerol kinase 2                                                              | -1.64 | 0.216 | -1.12 | 0.679 | -1.02 | 0.974 | -1.45 | 0.405 | -1.31 |
| 1434749_at   | BC067068      | cDNA sequence BC067068                                                         | -1.5  | 0.002 | -1.03 | 0.875 | -1.18 | 0.206 | -1.21 | 0.441 | -1.23 |
| 1445831_at   | ---           | ---                                                                            | -1.12 | 0.429 | -1.04 | 0.73  | -1.58 | 0.008 | -1.1  | 0.685 | -1.21 |
| 1427044_a_at | Amph          | amphiphysin                                                                    | -1.36 | 0.293 | -1.15 | 0.762 | -1.13 | 0.48  | -2.17 | 0.115 | -1.45 |
| 1436085_at   | Zbtb34        | zinc finger and BTB domain containing 34                                       | -1.57 | 0.209 | -1.18 | 0.458 | -1    | 0.997 | -1.23 | 0.522 | -1.24 |
| 1422366_at   | V1ra9         | vomeroneasal 1 receptor, A9                                                    | -1.23 | 0.119 | -1.21 | 0.611 | -1.18 | 0.588 | -1.28 | 0.628 | -1.23 |

|                    |                   |                                                                                      |       |       |       |       |       |       |       |       |       |
|--------------------|-------------------|--------------------------------------------------------------------------------------|-------|-------|-------|-------|-------|-------|-------|-------|-------|
| 1459966_at         | Osbpl7            | Oxysterol binding protein-like 7                                                     | -1.17 | 0.677 | -1.05 | 0.905 | -1.48 | 0.018 | -1.54 | 0.314 | -1.31 |
| 1434284_at         | Bdp1              | B double prime 1, subunit of RNA polymerase III transcription initiation factor IIIB | -1.13 | 0.632 | -1.32 | 0.022 | -1.19 | 0.091 | -1.07 | 0.642 | -1.18 |
| 1449217_at         | Casp8ap2          | caspase 8 associated protein 2                                                       | -1.17 | 0.371 | -1.04 | 0.762 | -1.48 | 0.011 | -1.07 | 0.734 | -1.19 |
| 1433417_at         | 8030497O21Rik     | RIKEN cDNA 8030497O21 gene                                                           | -1.23 | 0.24  | -1.23 | 0.312 | -1.16 | 0.713 | -1.51 | 0.405 | -1.28 |
| 1436980_x_at       | Cnot2             | CCR4-NOT transcription complex, subunit 2                                            | -1.03 | 0.734 | -1.16 | 0.363 | -1.53 | 0.042 | -1.4  | 0.085 | -1.28 |
| 1450486_a_at       | Oprl1             | opioid receptor-like 1                                                               | -1.29 | 0.583 | -1.25 | 0.498 | -1.1  | 0.874 | -2.75 | 0.085 | -1.6  |
| 1437643_at         | Cenpj             | centromere protein J                                                                 | -1.29 | 0.149 | -1.11 | 0.608 | -1.23 | 0.433 | -1.07 | 0.752 | -1.18 |
| 1433740_at         | 2610301K12Rik     | RIKEN cDNA 2610301K12 gene                                                           | -1.38 | 0.115 | -1.07 | 0.588 | -1.2  | 0.141 | -1.27 | 0.263 | -1.23 |
| AFFX-MURINE_B2_--- | ---               | ---                                                                                  | -1.11 | 0.039 | -1.2  | 0.457 | -1.33 | 0.001 | -1.2  | 0.046 | -1.21 |
| 1436032_at         | ---               | Bone marrow macrophage cDNA, RIKEN full-length enriched library, clone:18300         | -1.19 | 0.509 | -1.28 | 0.26  | -1.15 | 0.359 | -2.01 | 0.099 | -1.41 |
| 1446235_at         | BC002199          | cDNA sequence BC002199                                                               | -1.16 | 0.066 | -1.1  | 0.536 | -1.39 | 0.031 | -1.22 | 0.52  | -1.22 |
| 1442381_at         | Mkln1             | Muskelin 1, intracellular mediator containing kelch motifs                           | -1.12 | 0.271 | -1.08 | 0.605 | -1.51 | 0.024 | -1.16 | 0.544 | -1.21 |
| 1416275_at         | Slc26a6           | solute carrier family 26, member 6                                                   | -1.56 | 0.02  | -1.02 | 0.929 | -1.15 | 0.373 | -1.53 | 0.094 | -1.32 |
| 1446183_at         | Als2              | Amyotrophic lateral sclerosis 2 (juvenile) homolog (human)                           | -1.31 | 0.183 | -1.03 | 0.961 | -1.32 | 0.386 | -1.21 | 0.054 | -1.22 |
| 1416006_at         | Mdk               | midkine                                                                              | -1.15 | 0.281 | -1.05 | 0.814 | -1.51 | 0.001 | -1.43 | 0.311 | -1.28 |
| 1454521_at         | 2810421E14Rik     | RIKEN cDNA 2810421E14 gene                                                           | -1.05 | 0.87  | -1.34 | 0.409 | -1.27 | 0.384 | -1.35 | 0.48  | -1.25 |
| 1453421_at         | Srr               | serine racemase                                                                      | -1.05 | 0.78  | -1.23 | 0.347 | -1.38 | 0.138 | -1.2  | 0.575 | -1.22 |
| 1447406_at         | ---               | PREDICTED: Mus musculus similar to Hemoglobin alpha subunit (Hemoglobin al           | -1.45 | 0.331 | -1.22 | 0.696 | -1.02 | 0.955 | -1.14 | 0.625 | -1.21 |
| 1447947_at         | Zfyve16           | zinc finger, FYVE domain containing 16                                               | -1.19 | 0.393 | -1.13 | 0.67  | -1.32 | 0.241 | -1.18 | 0.585 | -1.2  |
| 1440604_at         | 8030494B02Rik     | Riken cDNA 8030494B02 gene                                                           | -1.01 | 0.916 | -1.1  | 0.41  | -1.68 | 0.224 | -1.27 | 0.25  | -1.27 |
| 1419555_at         | Elf5              | E74-like factor 5                                                                    | -1.07 | 0.771 | -1.24 | 0.103 | -1.33 | 0.194 | -1.12 | 0.826 | -1.19 |
| 1439059_at         | BC031748          | CDNA sequence BC031748                                                               | -1.06 | 0.735 | -1.12 | 0.505 | -1.52 | 0.065 | -1.56 | 0.111 | -1.32 |
| 1446830_at         | AU015892          | expressed sequence AU015892                                                          | -1.22 | 0.739 | -1.25 | 0.478 | -1.15 | 0.783 | -1.43 | 0.208 | -1.26 |
| 1440369_at         | Ptger3            | Prostaglandin E receptor 3 (subtype EP3)                                             | -1.21 | 0.637 | -1.06 | 0.857 | -1.4  | 0.018 | -1.36 | 0.131 | -1.26 |
| 1440551_at         | Dnajc1            | DnaJ (Hsp40) homolog, subfamily C, member 1                                          | -1.1  | 0.199 | -1.07 | 0.442 | -1.54 | 0.003 | -1.3  | 0.095 | -1.25 |
| 1429823_at         | 5430420E18Rik     | RIKEN cDNA 5430420E18 gene                                                           | -1.08 | 0.876 | -1.33 | 0.685 | -1.23 | 0.605 | -2.39 | 0.128 | -1.51 |
| 1439771_s_at       | D13Ert608e        | DNA segment, Chr 13, ERATO Doi 608, expressed                                        | -1.33 | 0.462 | -1.21 | 0.481 | -1.1  | 0.692 | -2.62 | 0.025 | -1.56 |
| 1459238_at         | ---               | ---                                                                                  | -1.19 | 0.017 | -1.11 | 0.416 | -1.33 | 0.039 | -1.3  | 0.309 | -1.23 |
| 1433961_at         | BC023814          | cDNA sequence BC023814                                                               | -1.54 | 0.028 | -1.01 | 0.93  | -1.17 | 0.143 | -1.44 | 0.012 | -1.29 |
| 1453824_at         | A930028L21Rik     | RIKEN cDNA A930028L21 gene                                                           | -1.27 | 0.095 | -1.26 | 0.252 | -1.1  | 0.648 | -1.36 | 0.373 | -1.25 |
| 1429226_at         | 2310014F06Rik     | RIKEN cDNA 2310014F06 gene                                                           | -1.19 | 0.489 | -1.29 | 0.099 | -1.15 | 0.301 | -1.07 | 0.808 | -1.17 |
| 1457677_at         | BC057593          | CDNA sequence BC057593                                                               | -1.2  | 0.135 | -1.18 | 0.153 | -1.24 | 0.435 | -1.41 | 0.065 | -1.26 |
| 1417154_at         | Slc25a14          | solute carrier family 25 (mitochondrial carrier, brain), member 14                   | -1.41 | 0.419 | -1.09 | 0.84  | -1.15 | 0.606 | -1.29 | 0.318 | -1.24 |
| 1426088_at         | ---               | ---                                                                                  | -1.04 | 0.746 | -1.24 | 0.364 | -1.37 | 0.144 | -1.21 | 0.487 | -1.22 |
| 1433757_a_at       | Nisch             | nischarin                                                                            | -1.25 | 0.473 | -1.01 | 0.933 | -1.43 | 0.125 | -1.65 | 0.143 | -1.33 |
| 1428409_at         | Nat13             | N-acetyltransferase 13                                                               | -1.16 | 0.408 | -1.12 | 0.057 | -1.36 | 0.1   | -1.29 | 0.193 | -1.23 |
| 1416375_at         | Ap3m1             | adaptor-related protein complex 3, mu 1 subunit                                      | -1.02 | 0.906 | -1.41 | 0.066 | -1.25 | 0.125 | -1.38 | 0.002 | -1.26 |
| 1420861_at         | Dctn4             | dynactin 4                                                                           | -1.07 | 0.638 | -1.04 | 0.741 | -1.68 | 0.036 | -1.05 | 0.536 | -1.21 |
| 1451847_s_at       | Arid4b            | AT rich interactive domain 4B (Rbp1 like)                                            | -1.31 | 0.706 | -1.11 | 0.734 | -1.2  | 0.335 | -1.79 | 0.215 | -1.36 |
| 1439161_at         | Saps3             | SAPS domain family, member 3                                                         | -1.13 | 0.356 | -1.06 | 0.337 | -1.51 | 0.029 | -1.31 | 0.056 | -1.25 |
| 1449374_at         | Pipox             | pipecolic acid oxidase                                                               | -1.06 | 0.726 | -1.17 | 0.108 | -1.44 | 0.161 | -1.9  | 0.378 | -1.39 |
| 1434631_at         | D3Ert751e         | DNA segment, Chr 3, ERATO Doi 751, expressed                                         | -1.2  | 0.554 | -1.45 | 0.008 | -1.03 | 0.854 | -1.42 | 0.205 | -1.28 |
| 1426719_at         | Apbb2             | amyloid beta (A4) precursor protein-binding, family B, member 2                      | -1.13 | 0.065 | -1.2  | 0.111 | -1.3  | 0.33  | -1.33 | 0.058 | -1.24 |
| 1453381_at         | C030033M12Rik     | RIKEN cDNA C030033M12 gene                                                           | -1.04 | 0.845 | -1.26 | 0.067 | -1.35 | 0.229 | -1.34 | 0.277 | -1.25 |
| 1432792_at         | 4930401B11Rik     | RIKEN cDNA 4930401B11 gene                                                           | -1.16 | 0.871 | -1.3  | 0.631 | -1.16 | 0.792 | -1.15 | 0.826 | -1.19 |
| 1458747_at         | Fbxo45            | F-box protein 45                                                                     | -1.37 | 0.696 | -1.05 | 0.946 | -1.23 | 0.641 | -1.11 | 0.638 | -1.19 |
| 1433992_at         | Shroom2 /// LOC67 | shroom family member 2 /// similar to Apical-like protein (APXL protein)             | -1.04 | 0.682 | -1.33 | 0.027 | -1.29 | 0.226 | -1.19 | 0.665 | -1.21 |
| 1451757_at         | BC003883          | cDNA sequence BC003883                                                               | -1.42 | 0.072 | -1.12 | 0.748 | -1.12 | 0.681 | -1.92 | 0.019 | -1.39 |
| 1434708_at         | Vhlh              | von Hippel-Lindau syndrome homolog                                                   | -1.24 | 0.097 | -1.24 | 0.235 | -1.14 | 0.422 | -1.32 | 0.054 | -1.23 |
| 1432548_at         | Parp14            | poly (ADP-ribose) polymerase family, member 14                                       | -1.05 | 0.115 | -1.16 | 0.757 | -1.47 | 0.181 | -1.7  | 0.117 | -1.35 |
| 1451211_a_at       | Lgtn              | ligatin                                                                              | -1.14 | 0.407 | -1.21 | 0.028 | -1.27 | 0.179 | -1.11 | 0.347 | -1.18 |
| 1446062_at         | B830028B13Rik     | RIKEN cDNA B830028B13 gene                                                           | -1.13 | 0.851 | -1.2  | 0.65  | -1.29 | 0.201 | -1.46 | 0.389 | -1.27 |
| 1417943_at         | Gng4              | guanine nucleotide binding protein (G protein), gamma 4 subunit                      | -1.92 | 0.283 | -1.03 | 0.962 | -1    | 0.998 | -1.78 | 0.41  | -1.43 |

|              |                   |                                                                               |       |       |       |       |       |       |       |       |       |
|--------------|-------------------|-------------------------------------------------------------------------------|-------|-------|-------|-------|-------|-------|-------|-------|-------|
| 1422435_at   | 2210010C04Rik     | RIKEN cDNA 2210010C04 gene                                                    | -1.06 | 0.823 | -1.02 | 0.946 | -1.75 | 0.26  | -1.58 | 0.4   | -1.35 |
| 1419445_s_at | Sap18             | Sin3-associated polypeptide 18                                                | -1.14 | 0.144 | -1.41 | 0.015 | -1.1  | 0.572 | -1.26 | 0.504 | -1.23 |
| 1427055_at   | Them4             | thioesterase superfamily member 4                                             | -1.05 | 0.803 | -1.33 | 0.136 | -1.27 | 0.179 | -1.9  | 0.222 | -1.39 |
| 1458311_at   | Usp36             | ubiquitin specific peptidase 36                                               | -1.2  | 0.499 | -1.06 | 0.8   | -1.4  | 0.105 | -1.08 | 0.838 | -1.19 |
| 1428219_at   | Rybp /// LOC62874 | RING1 and YY1 binding protein /// similar to RING1 and YY1 binding protein    | -1.12 | 0.234 | -1.22 | 0.093 | -1.28 | 0.04  | -1.11 | 0.069 | -1.18 |
| 1445827_at   | Prkcbp1           | Protein kinase C binding protein 1                                            | -1.22 | 0.306 | -1.17 | 0.279 | -1.22 | 0.374 | -1.05 | 0.788 | -1.17 |
| 1455121_at   | Lcor              | ligand dependent nuclear receptor corepressor                                 | -1.2  | 0.039 | -1.13 | 0.193 | -1.29 | 0.009 | -1.01 | 0.956 | -1.16 |
| 1439005_x_at | Ywhaz             | tyrosine 3-monooxygenase/tryptophan 5-monooxygenase activation protein, zeta  | -1.25 | 0.511 | -1.22 | 0.485 | -1.14 | 0.29  | -1.08 | 0.456 | -1.17 |
| 1423551_at   | Cdh13             | cadherin 13                                                                   | -1.22 | 0.06  | -1.11 | 0.644 | -1.28 | 0.495 | -1.72 | 0.309 | -1.33 |
| 1434957_at   | Cdon              | cell adhesion molecule-related/down-regulated by oncogenes                    | -1.3  | 0.046 | -1.17 | 0.605 | -1.16 | 0.713 | -1.97 | 0.078 | -1.4  |
| 1455668_at   | Whsc111           | Wolf-Hirschhorn syndrome candidate 1-like 1 (human)                           | -1.16 | 0.252 | -1.33 | 0.073 | -1.14 | 0.248 | -1.15 | 0.201 | -1.19 |
| 1430376_at   | Lrrc9             | leucine rich repeat containing 9                                              | -1.04 | 0.95  | -1.45 | 0.524 | -1.19 | 0.772 | -1.33 | 0.556 | -1.25 |
| 1426695_at   | 9030624J02Rik     | RIKEN cDNA 9030624J02 gene                                                    | -1.39 | 0.159 | -1.06 | 0.845 | -1.2  | 0.371 | -1.28 | 0.351 | -1.23 |
| 1443526_at   | ---               | ---                                                                           | -1.12 | 0.414 | -1.05 | 0.593 | -1.53 | 0.101 | -1.76 | 0.117 | -1.37 |
| 1428507_at   | Hdhd2             | haloacid dehalogenase-like hydrolase domain containing 2                      | -1.24 | 0.014 | -1.25 | 0.003 | -1.12 | 0.425 | -1.07 | 0.674 | -1.17 |
| 1454697_at   | Tloc1             | translocation protein 1                                                       | -1.05 | 0.731 | -1.14 | 0.111 | -1.5  | 0.03  | -1.05 | 0.595 | -1.19 |
| 1434890_at   | Opa1              | optic atrophy 1 homolog (human)                                               | -1.19 | 0.192 | -1.15 | 0.066 | -1.28 | 0.03  | -1.32 | 0.121 | -1.23 |
| 1420451_at   | Accn5             | amiloride-sensitive cation channel 5, intestinal                              | -1.22 | 0.693 | -1.36 | 0.249 | -1.06 | 0.909 | -1.28 | 0.755 | -1.23 |
| 1429675_at   | 1700023A16Rik     | RIKEN cDNA 1700023A16 gene                                                    | -1.2  | 0.747 | -1.29 | 0.641 | -1.13 | 0.862 | -2.11 | 0.449 | -1.43 |
| 1428453_at   | Nat12             | N-acetyltransferase 12                                                        | -1.12 | 0.353 | -1.15 | 0.033 | -1.36 | 0.005 | -1.21 | 0.152 | -1.21 |
| 1450901_a_at | AW011752          | expressed sequence AW011752                                                   | -1.16 | 0.31  | -1.33 | 0.043 | -1.14 | 0.26  | -1.24 | 0.227 | -1.21 |
| 1445374_at   | Vti1a             | Vesicle transport through interaction with t-SNAREs homolog 1A (yeast)        | -1.14 | 0.08  | -1.13 | 0.59  | -1.35 | 0.141 | -1.2  | 0.329 | -1.21 |
| 1446219_at   | D930015E06Rik     | RIKEN cDNA D930015E06 gene                                                    | -1.41 | 0.096 | -1.15 | 0.736 | -1.09 | 0.72  | -1.06 | 0.607 | -1.18 |
| 1454612_at   | Rkhd2             | ring finger and KH domain containing 2                                        | -1.21 | 0.268 | -1.03 | 0.82  | -1.43 | 0.13  | -1.13 | 0.444 | -1.2  |
| 1424693_at   | 4933407N01Rik     | RIKEN cDNA 4933407N01 gene                                                    | -1.19 | 0.038 | -1.17 | 0.179 | -1.24 | 0.388 | -1.1  | 0.53  | -1.18 |
| 1449630_s_at | Mark1             | MAP/microtubule affinity-regulating kinase 1                                  | -1.1  | 0.028 | -1.47 | 0.219 | -1.11 | 0.534 | -1.31 | 0.117 | -1.25 |
| 1420188_at   | Syt6              | synaptotagmin VI                                                              | -1.31 | 0.736 | -1.34 | 0.52  | -1.01 | 0.978 | -1.1  | 0.728 | -1.19 |
| 1440364_a_at | A230062G08Rik     | RIKEN cDNA A230062G08 gene                                                    | -1.04 | 0.943 | -1.59 | 0.035 | -1.11 | 0.632 | -1.73 | 0.029 | -1.37 |
| 1422621_at   | Ranbp2            | RAN binding protein 2                                                         | -1.19 | 0.537 | -1.21 | 0.109 | -1.21 | 0.209 | -1.04 | 0.839 | -1.16 |
| 1454195_at   | 4933433G19Rik     | RIKEN cDNA 4933433G19 gene                                                    | -1.12 | 0.674 | -1.51 | 0.328 | -1.06 | 0.819 | -1.02 | 0.899 | -1.18 |
| 1429060_at   | ---               | ---                                                                           | -1.26 | 0.325 | -1.34 | 0.061 | -1.04 | 0.724 | -1.29 | 0.372 | -1.23 |
| 1423286_at   | Cbln1             | cerebellin 1 precursor protein                                                | -1.63 | 0.089 | -1.11 | 0.754 | -1.02 | 0.942 | -1.22 | 0.611 | -1.24 |
| 1416947_s_at | Acaa1a /// Acaa1b | acetyl-Coenzyme A acyltransferase 1A /// acetyl-Coenzyme A acyltransferase 1B | -1.05 | 0.867 | -1.73 | 0.235 | -1.03 | 0.739 | -1.38 | 0.241 | -1.3  |
| 1443610_at   | ---               | Transcribed locus                                                             | -1.73 | 0.015 | -1.05 | 0.881 | -1.04 | 0.876 | -1.61 | 0.012 | -1.36 |
| 1421664_a_at | Styx              | phosphoserine/threonine/tyrosine interaction protein                          | -1.14 | 0.145 | -1.1  | 0.619 | -1.4  | 0.007 | -1.21 | 0.041 | -1.21 |
| 1425217_a_at | Synj2             | synaptojanin 2                                                                | -1.38 | 0.751 | -1.14 | 0.841 | -1.12 | 0.811 | -1.55 | 0.515 | -1.3  |
| 1435198_at   | LOC545228         | hypothetical protein LOC545228                                                | -1.27 | 0.128 | -1.29 | 0.314 | -1.07 | 0.712 | -1.25 | 0.328 | -1.22 |
| 1419637_s_at | 4833420G17Rik     | RIKEN cDNA 4833420G17 gene                                                    | -1.12 | 0.57  | -1.41 | 0.069 | -1.12 | 0.516 | -1.37 | 0.204 | -1.25 |
| 1419845_at   | Dlx1as            | distal-less homeobox 1, antisense                                             | -1.55 | 0.136 | -1.02 | 0.952 | -1.15 | 0.792 | -1.03 | 0.937 | -1.19 |
| 1438783_at   | LOC637870         | similar to Nedd4 WW binding protein 4                                         | -1.1  | 0.859 | -1.3  | 0.527 | -1.23 | 0.64  | -1.93 | 0.184 | -1.39 |
| 1437869_at   | 3222402P14Rik     | RIKEN cDNA 3222402P14 gene                                                    | -1.04 | 0.84  | -1.4  | 0.279 | -1.22 | 0.438 | -1.22 | 0.545 | -1.22 |
| 1433331_at   | C030046M01Rik     | RIKEN cDNA C030046M01 gene                                                    | -1.15 | 0.821 | -1.45 | 0.547 | -1.07 | 0.937 | -1.5  | 0.456 | -1.29 |
| 1430131_at   | Crry              | complement receptor related protein                                           | -1.07 | 0.777 | -1.17 | 0.551 | -1.41 | 0.222 | -1.7  | 0.003 | -1.34 |
| 1434787_at   | Arf3              | ADP-ribosylation factor 3                                                     | -1.11 | 0.555 | -1.26 | 0.055 | -1.25 | 0.375 | -1.38 | 0.13  | -1.25 |
| 1443758_at   | Wdr18             | WD repeat domain 18                                                           | -1.29 | 0.776 | -1.25 | 0.623 | -1.09 | 0.865 | -1.58 | 0.331 | -1.3  |
| 1416143_at   | Atp5j             | ATP synthase, H+ transporting, mitochondrial F0 complex, subunit F            | -1.13 | 0.177 | -1.23 | 0.097 | -1.25 | 0.028 | -1.03 | 0.809 | -1.16 |
| 1443444_at   | Mgat5             | Mannoside acetylglucosaminyltransferase 5                                     | -1.1  | 0.829 | -1.19 | 0.683 | -1.33 | 0.39  | -1.48 | 0.127 | -1.28 |
| 1452122_at   | AI314180          | expressed sequence AI314180                                                   | -1.14 | 0     | -1.33 | 0.036 | -1.15 | 0.583 | -1.18 | 0.44  | -1.2  |
| 1425287_at   | Zfp189            | zinc finger protein 189                                                       | -1.37 | 0.213 | -1.15 | 0.334 | -1.11 | 0.526 | -1.4  | 0.11  | -1.26 |
| 1459704_at   | Dnajc7            | DnaJ (Hsp40) homolog, subfamily C, member 7                                   | -1.25 | 0.128 | -1.32 | 0.414 | -1.06 | 0.859 | -1.18 | 0.226 | -1.2  |
| 1431381_at   | 3110005L24Rik     | RIKEN cDNA 3110005L24 gene                                                    | -1.01 | 0.857 | -1.45 | 0.115 | -1.21 | 0.422 | -1.51 | 0.011 | -1.3  |
| 1460311_at   | Srst              | simple repeat sequence-containing transcript                                  | -1.52 | 0.176 | -1.12 | 0.855 | -1.05 | 0.893 | -2.78 | 0.111 | -1.62 |
| 1444662_at   | Pla2g4c           | phospholipase A2, group IVC (cytosolic, calcium-independent)                  | -1.37 | 0.158 | -1.16 | 0.257 | -1.1  | 0.69  | -1.14 | 0.402 | -1.19 |

|              |               |                                                                                  |       |       |       |       |       |       |       |       |       |
|--------------|---------------|----------------------------------------------------------------------------------|-------|-------|-------|-------|-------|-------|-------|-------|-------|
| 1434010_at   | Als2cr13      | amyotrophic lateral sclerosis 2 (juvenile) chromosome region, candidate 13 (hum: | -1.1  | 0.599 | -1.22 | 0.095 | -1.29 | 0.292 | -1.21 | 0.28  | -1.21 |
| 1439847_s_at | Klf12         | Kruppel-like factor 12                                                           | -1.05 | 0.861 | -1.01 | 0.967 | -1.8  | 0.036 | -1.63 | 0.292 | -1.37 |
| 1421075_s_at | Cyp7b1        | cytochrome P450, family 7, subfamily b, polypeptide 1                            | -1.13 | 0.496 | -1.54 | 0.075 | -1.03 | 0.705 | -1.43 | 0.158 | -1.29 |
| 1434389_at   | AI449023      | expressed sequence AI449023                                                      | -1.18 | 0.299 | -1.15 | 0.303 | -1.28 | 0.31  | -1.19 | 0.176 | -1.2  |
| 1451383_a_at | Chuk          | conserved helix-loop-helix ubiquitous kinase                                     | -1.15 | 0.057 | -1.24 | 0.001 | -1.21 | 0.03  | -1.44 | 0.021 | -1.26 |
| 1453191_at   | Col27a1       | procollagen, type XXVII, alpha 1                                                 | -1.19 | 0.195 | -1.04 | 0.828 | -1.44 | 0.035 | -1.25 | 0.182 | -1.23 |
| 1434100_x_at | Ppargc1a      | Peroxisome proliferative activated receptor, gamma, coactivator 1 alpha          | -1.19 | 0.536 | -1.25 | 0.514 | -1.17 | 0.37  | -1.13 | 0.856 | -1.18 |
| 1428374_at   | Glce          | glucuronyl C5-epimerase                                                          | -1.03 | 0.85  | -1.17 | 0.269 | -1.49 | 0.046 | -1.16 | 0.382 | -1.21 |
| 1434933_at   | 5730557L09Rik | RIKEN cDNA 5730557L09 gene                                                       | -1.13 | 0.105 | -1.06 | 0.394 | -1.49 | 0.048 | -1.12 | 0.338 | -1.2  |
| 1440952_at   | Smad7         | MAD homolog 7 (Drosophila)                                                       | -1.41 | 0.236 | -1.07 | 0.867 | -1.17 | 0.658 | -2.13 | 0.037 | -1.45 |
| 1418322_at   | Crem          | cAMP responsive element modulator                                                | -1.1  | 0.654 | -1.21 | 0.305 | -1.31 | 0.08  | -1.17 | 0.409 | -1.2  |
| 1436757_a_at | Cox6b1        | cytochrome c oxidase, subunit VIb polypeptide 1                                  | -1.12 | 0.213 | -1.24 | 0.258 | -1.25 | 0     | -1.01 | 0.857 | -1.15 |
| 1444995_at   | Cdy12         | Chromodomain protein, Y chromosome-like 2                                        | -1.05 | 0.959 | -1.66 | 0.311 | -1.06 | 0.838 | -1.12 | 0.603 | -1.22 |
| 1453108_at   | Arsk          | arylsulfatase K                                                                  | -1.19 | 0.114 | -1.13 | 0.244 | -1.3  | 0.164 | -1.17 | 0.011 | -1.19 |
| 1435333_at   | 1110007M04Rik | RIKEN cDNA 1110007M04 gene                                                       | -1.25 | 0.425 | -1.09 | 0.597 | -1.28 | 0.165 | -1.04 | 0.884 | -1.16 |
| 1444284_at   | A130050O07Rik | RIKEN cDNA A130050O07 gene                                                       | -1.03 | 0.967 | -1.85 | 0.316 | -1.01 | 0.955 | -3.92 | 0.327 | -1.95 |
| 1446516_at   | Bcl7c         | B-cell CLL/lymphoma 7C                                                           | -1.42 | 0.413 | -1.25 | 0.766 | -1    | 0.98  | -1.04 | 0.891 | -1.18 |
| 1439121_at   | H2-T22        | histocompatibility 2, T region locus 22                                          | -1.51 | 0.419 | -1.05 | 0.925 | -1.12 | 0.737 | -1.93 | 0.097 | -1.4  |
| 1459625_at   | Frap1         | FK506 binding protein 12-rapamycin associated protein 1                          | -1.01 | 0.955 | -1.29 | 0.211 | -1.36 | 0.224 | -1.12 | 0.156 | -1.19 |
| 1424361_at   | BC019943      | cDNA sequence BC019943                                                           | -1.24 | 0.245 | -1.17 | 0.248 | -1.19 | 0.319 | -1.25 | 0.568 | -1.21 |
| 1445844_at   | ---           | Adult male testis cDNA, RIKEN full-length enriched library, clone:4930547H19 pr  | -1.24 | 0.683 | -1.19 | 0.658 | -1.16 | 0.636 | -1.05 | 0.908 | -1.16 |
| 1423869_s_at | Txnrd3        | thioredoxin reductase 3                                                          | -1.12 | 0.579 | -1.32 | 0.329 | -1.18 | 0.458 | -1.18 | 0.501 | -1.2  |
| 1433342_at   | 5730416F02Rik | RIKEN cDNA 5730416F02 gene                                                       | -1.17 | 0.795 | -1.48 | 0.394 | -1.03 | 0.833 | -1.82 | 0.23  | -1.37 |
| 1417194_at   | Sod2          | superoxide dismutase 2, mitochondrial                                            | -1.1  | 0.741 | -1.04 | 0.846 | -1.58 | 0.056 | -1.75 | 0.017 | -1.37 |
| 1440042_at   | Ank2          | ankyrin 2, brain                                                                 | -1.12 | 0.492 | -1.3  | 0.691 | -1.19 | 0.14  | -1.28 | 0.273 | -1.22 |
| 1434723_at   | AI426748      | expressed sequence AI426748                                                      | -1.1  | 0.696 | -1.45 | 0.378 | -1.11 | 0.262 | -1.34 | 0.074 | -1.25 |
| 1416201_at   | Crk           | v-crk sarcoma virus CT10 oncogene homolog (avian)                                | -1.21 | 0.314 | -1.21 | 0.151 | -1.18 | 0.068 | -1.09 | 0.693 | -1.17 |
| 1446324_at   | Cacna2d1      | Calcium channel, voltage-dependent, alpha2/delta subunit 1                       | -1.04 | 0.715 | -1.11 | 0.785 | -1.57 | 0.029 | -1.28 | 0.282 | -1.25 |
| 1421765_at   | Pax5          | paired box gene 5                                                                | -1.35 | 0.328 | -1.23 | 0.598 | -1.05 | 0.909 | -5.14 | 0.051 | -2.19 |
| 1449867_at   | Hoxc9         | homeo box C9                                                                     | -1.07 | 0.504 | -1.35 | 0.161 | -1.21 | 0.384 | -2.47 | 0.415 | -1.53 |
| 1459875_x_at | 5730494M16Rik | RIKEN cDNA 5730494M16 gene                                                       | -1.36 | 0.129 | -1.17 | 0.373 | -1.1  | 0.369 | -1.21 | 0.398 | -1.21 |
| 1448830_at   | Dusp1         | dual specificity phosphatase 1                                                   | -1.18 | 0.674 | -1.32 | 0.28  | -1.11 | 0.631 | -1.13 | 0.726 | -1.18 |
| 1459460_at   | ---           | ---                                                                              | -1.05 | 0.905 | -1.19 | 0.519 | -1.41 | 0.418 | -1.16 | 0.72  | -1.2  |
| 1427224_at   | Acsm2         | Acyl-CoA synthetase medium-chain family member 2                                 | -1.12 | 0.863 | -1.25 | 0.741 | -1.23 | 0.611 | -1.89 | 0.056 | -1.37 |
| 1441970_at   | E430010N07Rik | RIKEN cDNA E430010N07 gene                                                       | -1.05 | 0.746 | -1.02 | 0.93  | -1.78 | 0.035 | -1.13 | 0.606 | -1.24 |
| 1446188_at   | Lrriq2        | leucine-rich repeats and IQ motif containing 2                                   | -1.54 | 0.381 | -1.12 | 0.467 | -1.04 | 0.853 | -1.3  | 0.299 | -1.25 |
| 1457715_at   | 1010001B22Rik | RIKEN cDNA 1010001B22 gene                                                       | -1.25 | 0.778 | -1.21 | 0.432 | -1.14 | 0.49  | -1.16 | 0.756 | -1.19 |
| 1435461_at   | Magi3         | membrane associated guanylate kinase, WW and PDZ domain containing 3             | -1.07 | 0.271 | -1.08 | 0.301 | -1.57 | 0.08  | -1.37 | 0.216 | -1.27 |
| 1424372_at   | Mrpl32        | mitochondrial ribosomal protein L32                                              | -1.21 | 0.017 | -1.09 | 0.137 | -1.32 | 0.128 | -1.11 | 0.639 | -1.18 |
| 1427043_s_at | Cova1         | cytosolic ovarian carcinoma antigen 1                                            | -1.2  | 0.019 | -1.1  | 0.514 | -1.32 | 0.014 | -1.25 | 0.426 | -1.22 |
| 1456397_at   | Cdh4          | cadherin 4                                                                       | -1.27 | 0.09  | -1.09 | 0.716 | -1.25 | 0.243 | -1.62 | 0.004 | -1.31 |
| 1419183_at   | Papd4         | PAP associated domain containing 4                                               | -1.28 | 0.263 | -1.11 | 0.323 | -1.22 | 0.061 | -1.03 | 0.828 | -1.16 |
| 1439721_at   | C85627        | expressed sequence C85627                                                        | -1.18 | 0.641 | -1.19 | 0.702 | -1.23 | 0.542 | -1    | 0.999 | -1.15 |
| 1456274_at   | C230071H18Rik | RIKEN cDNA C230071H18 gene                                                       | -1.58 | 0.319 | -1.11 | 0.684 | -1.03 | 0.888 | -2.53 | 0.053 | -1.56 |
| 1442195_at   | BB283564      | expressed sequence BB283564                                                      | -1.05 | 0.93  | -1.2  | 0.474 | -1.39 | 0.049 | -1.27 | 0.263 | -1.23 |
| 1454369_a_at | Nfatc4        | nuclear factor of activated T-cells, cytoplasmic, calcineurin-dependent 4        | -1.25 | 0.34  | -1.26 | 0.695 | -1.1  | 0.667 | -1.08 | 0.763 | -1.17 |
| 1442053_at   | Phkb          | Phosphorylase kinase beta                                                        | -1.15 | 0.713 | -1.3  | 0.206 | -1.15 | 0.527 | -1.56 | 0.365 | -1.29 |
| 1455160_at   | 2610203C20Rik | RIKEN cDNA 2610203C20 gene                                                       | -1.28 | 0.32  | -1.13 | 0.472 | -1.19 | 0.479 | -1.08 | 0.793 | -1.17 |
| 1422442_at   | Smu1          | smu-1 suppressor of mec-8 and unc-52 homolog (C. elegans)                        | -1.18 | 0.014 | -1.21 | 0.003 | -1.2  | 0.033 | -1.2  | 0.213 | -1.2  |
| 1428563_at   | Ddx10         | DEAD (Asp-Glu-Ala-Asp) box polypeptide 10                                        | -1.01 | 0.907 | -1.68 | 0.044 | -1.09 | 0.716 | -1.38 | 0.207 | -1.29 |
| 1433749_at   | Gna13         | guanine nucleotide binding protein, alpha 13                                     | -1.08 | 0.597 | -1.26 | 0.084 | -1.27 | 0.101 | -1.1  | 0.598 | -1.18 |
| 1420952_at   | Son           | Son cell proliferation protein                                                   | -1.06 | 0.578 | -1.18 | 0.221 | -1.41 | 0.09  | -1.29 | 0.198 | -1.23 |
| 1439292_at   | 2210408F21Rik | RIKEN cDNA 2210408F21 gene                                                       | -1.04 | 0.865 | -1.17 | 0.556 | -1.45 | 0.139 | -1.41 | 0.21  | -1.27 |

|              |                    |                                                             |       |       |       |       |       |       |       |       |       |
|--------------|--------------------|-------------------------------------------------------------|-------|-------|-------|-------|-------|-------|-------|-------|-------|
| 1438805_at   | 9230106B05Rik      | RIKEN cDNA 9230106B05 gene                                  | -1    | 0.991 | -1.76 | 0.262 | -1.06 | 0.865 | -2.32 | 0.273 | -1.54 |
| 1425309_at   | Catsper2           | cation channel, sperm associated 2                          | -1.29 | 0.096 | -1.28 | 0.088 | -1.05 | 0.833 | -1.09 | 0.437 | -1.18 |
| 1455637_x_at | LOC245305          | Similar to hypothetical protein FLJ38281                    | -1.05 | 0.867 | -1.23 | 0.165 | -1.34 | 0.22  | -1.37 | 0.222 | -1.25 |
| 1455070_at   | Dcp2               | DCP2 decapping enzyme homolog (S. cerevisiae)               | -1.19 | 0.023 | -1.14 | 0.061 | -1.26 | 0.129 | -1.28 | 0.056 | -1.22 |
| 1457298_at   | ---                | ---                                                         | -1.03 | 0.944 | -1.27 | 0.646 | -1.34 | 0.127 | -1.39 | 0.385 | -1.26 |
| 1442281_at   | D4ErtD796e         | DNA segment, Chr 4, ERATO Doi 796, expressed                | -1.14 | 0.084 | -1.49 | 0.404 | -1.04 | 0.858 | -1.94 | 0.127 | -1.4  |
| 1443187_at   | ---                | ---                                                         | -1.89 | 0.383 | -1.02 | 0.971 | -1.01 | 0.987 | -1.97 | 0.094 | -1.47 |
| 1434609_at   | B930007L02Rik      | RIKEN cDNA B930007L02 gene                                  | -1.23 | 0.156 | -1.25 | 0.004 | -1.11 | 0.447 | -1.04 | 0.349 | -1.16 |
| 1446720_at   | Alcam              | Activated leukocyte cell adhesion molecule                  | -1.07 | 0.87  | -1.12 | 0.576 | -1.47 | 0.144 | -1.32 | 0.144 | -1.25 |
| 1435251_at   | Snx13              | sorting nexin 13                                            | -1.21 | 0.142 | -1.14 | 0.048 | -1.25 | 0.179 | -1.35 | 0.258 | -1.24 |
| 1455702_at   | ---                | ---                                                         | -1.03 | 0.925 | -1.38 | 0.257 | -1.23 | 0.543 | -1.29 | 0.317 | -1.23 |
| 1452502_at   | Serf1              | small EDRK-rich factor 1                                    | -1.27 | 0.438 | -1.07 | 0.454 | -1.28 | 0.341 | -1.11 | 0.774 | -1.18 |
| 1419180_at   | Bcl9l              | B-cell CLL/lymphoma 9-like                                  | -1.15 | 0.202 | -1.2  | 0.251 | -1.25 | 0.304 | -1.17 | 0.557 | -1.19 |
| 1435511_at   | Syn2               | synapsin II                                                 | -1.2  | 0.111 | -1.16 | 0.702 | -1.23 | 0.501 | -1.53 | 0.097 | -1.28 |
| 1459119_at   | Cenpo              | centromere protein O                                        | -1.21 | 0.566 | -1    | 0.998 | -1.47 | 0.148 | -1.17 | 0.547 | -1.21 |
| 1455681_at   | Zfp369             | zinc finger protein 369                                     | -1.22 | 0.066 | -1.14 | 0.294 | -1.23 | 0.293 | -1.27 | 0.455 | -1.22 |
| 1429004_at   | Phip               | pleckstrin homology domain interacting protein              | -1.16 | 0.245 | -1.1  | 0.367 | -1.36 | 0.063 | -1.38 | 0.104 | -1.25 |
| 1456162_x_at | Add3               | adducin 3 (gamma)                                           | -1.26 | 0.394 | -1.07 | 0.527 | -1.29 | 0.281 | -1.7  | 0.234 | -1.33 |
| 1442643_at   | Jmjd3              | jumonji domain containing 3                                 | -1.29 | 0.692 | -1.36 | 0.038 | -1    | 0.99  | -1.77 | 0.231 | -1.36 |
| 1429137_at   | 2810422O20Rik      | RIKEN cDNA 2810422O20 gene                                  | -1.13 | 0.696 | -1.22 | 0.036 | -1.25 | 0.22  | -1.76 | 0.049 | -1.34 |
| 1429868_at   | ---                | ---                                                         | -1.11 | 0.605 | -1.34 | 0.235 | -1.16 | 0.29  | -1.4  | 0.545 | -1.25 |
| 1416642_a_at | Tpt1               | tumor protein, translationally-controlled 1                 | -1.13 | 0.015 | -1.16 | 0.481 | -1.31 | 0.01  | -1.2  | 0.013 | -1.2  |
| 1444149_at   | Zfp96              | zinc finger protein 96                                      | -1.02 | 0.925 | -1.07 | 0.869 | -1.69 | 0.073 | -1.15 | 0.39  | -1.23 |
| 1439486_at   | Kcnt1              | potassium channel, subfamily T, member 1                    | -1.18 | 0.451 | -1.18 | 0.698 | -1.22 | 0.369 | -1.57 | 0.352 | -1.29 |
| 1456116_at   | Ctnnd2             | catenin (cadherin associated protein), delta 2              | -1.02 | 0.924 | -1.14 | 0.751 | -1.52 | 0.08  | -1.28 | 0.476 | -1.24 |
| 1447575_at   | ---                | ---                                                         | -1.01 | 0.808 | -1.12 | 0.738 | -1.59 | 0.268 | -1.13 | 0.383 | -1.21 |
| 1443779_s_at | Lcor               | ligand dependent nuclear receptor corepressor               | -1.02 | 0.826 | -1.17 | 0.038 | -1.49 | 0.012 | -1.26 | 0.003 | -1.23 |
| 1455158_at   | Itga3              | integrin alpha 3                                            | -1.25 | 0.052 | -1.17 | 0.124 | -1.17 | 0.421 | -1.07 | 0.819 | -1.16 |
| 1449410_a_at | Gas5               | growth arrest specific 5                                    | -1.14 | 0.102 | -1.14 | 0.337 | -1.33 | 0.179 | -1.46 | 0.004 | -1.27 |
| 1419916_at   | Rnf20              | Ring finger protein 20                                      | -1.43 | 0.496 | -1.05 | 0.897 | -1.16 | 0.412 | -1.08 | 0.668 | -1.18 |
| 1431425_a_at | 4930535B03Rik      | RIKEN cDNA 4930535B03 gene                                  | -1.18 | 0.245 | -1.27 | 0.697 | -1.13 | 0.44  | -1.18 | 0.537 | -1.19 |
| 1443899_at   | BC028799 /// 4922t | cDNA sequence BC028799 /// RIKEN cDNA 4922501C03 gene       | -1.15 | 0.327 | -1.08 | 0.628 | -1.4  | 0.069 | -1.15 | 0.409 | -1.19 |
| 1444772_at   | Smyd3              | SET and MYND domain containing 3                            | -1.33 | 0.31  | -1.13 | 0.522 | -1.15 | 0.328 | -1.4  | 0.119 | -1.25 |
| 1441359_at   | 9230115F04Rik      | RIKEN cDNA 9230115F04 gene                                  | -1.1  | 0.641 | -1.28 | 0.503 | -1.22 | 0.102 | -2.71 | 0.062 | -1.58 |
| 1429806_at   | Eral1              | Era (G-protein)-like 1 (E. coli)                            | -1.01 | 0.968 | -1.27 | 0.292 | -1.37 | 0.363 | -1.24 | 0.36  | -1.22 |
| 1421742_at   | Gdi2               | guanosine diphosphate (GDP) dissociation inhibitor 2        | -1.16 | 0.194 | -1.12 | 0.725 | -1.33 | 0.513 | -1.89 | 0.099 | -1.37 |
| 1416064_a_at | Hspa5              | heat shock 70kD protein 5 (glucose-regulated protein)       | -1.12 | 0.591 | -1.09 | 0.647 | -1.43 | 0.088 | -1.28 | 0.063 | -1.23 |
| 1436344_at   | ---                | ---                                                         | -1.2  | 0.324 | -1.3  | 0.084 | -1.1  | 0.646 | -1.29 | 0.063 | -1.22 |
| 1460317_s_at | Gna13              | guanine nucleotide binding protein, alpha 13                | -1.33 | 0.221 | -1.12 | 0.362 | -1.16 | 0.592 | -1.22 | 0.15  | -1.21 |
| 1447700_x_at | Ss18l1             | synovial sarcoma translocation gene on chromosome 18-like 1 | -1.15 | 0.323 | -1.18 | 0.775 | -1.26 | 0.247 | -1.51 | 0.269 | -1.27 |
| 1417747_at   | Cplx1              | complexin 1                                                 | -1.16 | 0.39  | -1.39 | 0.101 | -1.07 | 0.679 | -1.57 | 0.011 | -1.3  |
| 1438876_at   | A130014A01Rik      | RIKEN cDNA A130014A01 gene                                  | -1.43 | 0.081 | -1.12 | 0.686 | -1.09 | 0.725 | -1.24 | 0.584 | -1.22 |
| 1437706_x_at | Rps14 /// LOC6728  | ribosomal protein S14 /// similar to ribosomal protein S14  | -1.13 | 0.057 | -1.17 | 0.186 | -1.3  | 0.007 | -1.19 | 0.039 | -1.2  |
| 1433732_x_at | Igf2bp3            | insulin-like growth factor 2 mRNA binding protein 3         | -1.09 | 0.655 | -1.29 | 0.216 | -1.22 | 0.336 | -1.23 | 0.352 | -1.21 |
| 1417388_at   | Bex2               | brain expressed X-linked 2                                  | -1.01 | 0.968 | -1.11 | 0.806 | -1.61 | 0.163 | -1.14 | 0.709 | -1.22 |
| 1447432_s_at | Zfp263             | zinc finger protein 263                                     | -1.16 | 0.37  | -1.07 | 0.651 | -1.39 | 0.057 | -1.71 | 0.117 | -1.33 |
| 1452061_s_at | Strbp              | spermatid perinuclear RNA binding protein                   | -1.28 | 0.123 | -1.22 | 0.104 | -1.1  | 0.39  | -1.94 | 0.152 | -1.38 |
| 1443843_x_at | LOC433546          | similar to ribosomal protein L9                             | -1.15 | 0.061 | -1.14 | 0.536 | -1.31 | 0.001 | -1.25 | 0.004 | -1.21 |
| 1418433_at   | Cab39              | calcium binding protein 39                                  | -1.14 | 0.388 | -1.19 | 0.112 | -1.26 | 0.116 | -1.07 | 0.688 | -1.16 |
| 1452141_a_at | Sepp1              | selenoprotein P, plasma, 1                                  | -1.07 | 0.045 | -1.17 | 0.435 | -1.38 | 0.001 | -1.13 | 0.338 | -1.19 |
| 1429503_at   | 2900024C23Rik      | RIKEN cDNA 2900024C23 gene                                  | -1.36 | 0.111 | -1.15 | 0.347 | -1.1  | 0.505 | -1.68 | 0.134 | -1.32 |
| 1458079_at   | Usp40              | ubiquitin specific peptidase 40                             | -1.11 | 0.096 | -1.16 | 0.388 | -1.33 | 0.315 | -1.7  | 0.065 | -1.33 |
| 1439804_at   | 2310015A10Rik      | RIKEN cDNA 2310015A10 gene                                  | -1.69 | 0.204 | -1.05 | 0.814 | -1.03 | 0.902 | -1.24 | 0.53  | -1.25 |

|              |                   |                                                                        |       |       |       |       |       |       |       |       |       |
|--------------|-------------------|------------------------------------------------------------------------|-------|-------|-------|-------|-------|-------|-------|-------|-------|
| 1422626_at   | Mmp16             | matrix metalloproteinase 16                                            | -1.46 | 0.436 | -1.13 | 0.72  | -1.05 | 0.878 | -1.28 | 0.136 | -1.23 |
| 1436506_a_at | 1110008H02Rik     | RIKEN cDNA 1110008H02 gene                                             | -1.3  | 0.026 | -1.05 | 0.534 | -1.26 | 0.154 | -1.42 | 0.003 | -1.26 |
| 1430245_at   | ---               | ---                                                                    | -1.23 | 0.262 | -1.07 | 0.64  | -1.3  | 0.116 | -1.16 | 0.632 | -1.19 |
| 1428495_at   | 2410003K15Rik     | RIKEN cDNA 2410003K15 gene                                             | -1.13 | 0.126 | -1.23 | 0.023 | -1.23 | 0.153 | -1.17 | 0.368 | -1.19 |
| 1456702_x_at | Mat2a             | methionine adenosyltransferase II, alpha                               | -1.24 | 0.523 | -1.13 | 0.479 | -1.22 | 0.189 | -1.21 | 0.11  | -1.2  |
| 1455073_at   | Cdadc1            | cytidine and dCMP deaminase domain containing 1                        | -1.1  | 0.503 | -1.08 | 0.349 | -1.48 | 0.099 | -1.21 | 0.301 | -1.22 |
| 1418607_at   | Zfp99             | zinc finger protein 99                                                 | -1.12 | 0.205 | -1.27 | 0.152 | -1.19 | 0.349 | -1.23 | 0.201 | -1.2  |
| 1431190_x_at | Fahd2a            | fumarylacetoacetate hydrolase domain containing 2A                     | -1.17 | 0.156 | -1.28 | 0.107 | -1.14 | 0.262 | -1.16 | 0.379 | -1.19 |
| 1442715_at   | ---               | ---                                                                    | -1.48 | 0.124 | -1.14 | 0.859 | -1.03 | 0.887 | -1.04 | 0.907 | -1.17 |
| 1434596_at   | ---               | PREDICTED: Mus musculus hypothetical protein LOC625568 (LOC625568), mR | -1.09 | 0.429 | -1.08 | 0.907 | -1.49 | 0.273 | -1.88 | 0.22  | -1.38 |
| 1452501_at   | Cyp2c38           | cytochrome P450, family 2, subfamily c, polypeptide 38                 | -1.13 | 0.439 | -1.11 | 0.54  | -1.37 | 0.109 | -1.92 | 0.169 | -1.38 |
| 1445998_at   | Prkg1             | Protein kinase, cGMP-dependent, type I                                 | -1.01 | 0.907 | -1.1  | 0.886 | -1.61 | 0.06  | -1.36 | 0.578 | -1.27 |
| 1430065_at   | A930005N03Rik     | RIKEN cDNA A930005N03 gene                                             | -1.25 | 0.743 | -1.19 | 0.759 | -1.14 | 0.588 | -2.3  | 0.122 | -1.47 |
| 1453158_at   | Zfp622            | zinc finger protein 622                                                | -1.19 | 0.814 | -1.22 | 0.749 | -1.17 | 0.579 | -1.25 | 0.658 | -1.21 |
| 1416841_at   | 1110059E24Rik     | RIKEN cDNA 1110059E24 gene                                             | -1.27 | 0.113 | -1.19 | 0.001 | -1.12 | 0.374 | -1.77 | 0.11  | -1.34 |
| 1453804_a_at | Orc4l             | origin recognition complex, subunit 4-like (S. cerevisiae)             | -1.09 | 0.361 | -1.29 | 0.038 | -1.21 | 0.094 | -1.21 | 0.18  | -1.2  |
| 1416795_at   | Cryl1             | crystallin, lamda 1                                                    | -1.32 | 0.077 | -1.31 | 0.497 | -1    | 0.985 | -1.02 | 0.925 | -1.16 |
| 1415970_at   | Cox6c             | cytochrome c oxidase, subunit VIc                                      | -1.22 | 0.057 | -1.19 | 0.08  | -1.16 | 0.133 | -1.08 | 0.156 | -1.17 |
| 1438555_x_at | 4933405I11Rik /// | RIKEN cDNA 4933405I11 gene /// mucin 4                                 | -1.32 | 0.468 | -1.11 | 0.849 | -1.16 | 0.157 | -3.29 | 0.292 | -1.72 |
| 1443528_at   | Ttbk1             | tau tubulin kinase 1                                                   | -1.22 | 0.54  | -1.41 | 0.266 | -1.01 | 0.951 | -1.02 | 0.775 | -1.17 |
| 1436960_at   | Brd3              | bromodomain containing 3                                               | -1.1  | 0.104 | -1.18 | 0.514 | -1.32 | 0.202 | -1.09 | 0.022 | -1.17 |
| 1433856_at   | Hisppd1           | histidine acid phosphatase domain containing 1                         | -1.3  | 0.067 | -1.19 | 0.434 | -1.1  | 0.185 | -1.07 | 0.328 | -1.17 |
| 1452961_at   | 1200009O22Rik     | RIKEN cDNA 1200009O22 gene                                             | -1.29 | 0.278 | -1.2  | 0.434 | -1.1  | 0.541 | -1.17 | 0.218 | -1.19 |
| 1416446_at   | Tmem30a           | transmembrane protein 30A                                              | -1.02 | 0.749 | -1.28 | 0.036 | -1.32 | 0.073 | -1.38 | 0.239 | -1.25 |
| 1451133_s_at | Tmem168           | transmembrane protein 168                                              | -1.07 | 0.779 | -1.11 | 0.529 | -1.45 | 0.034 | -1.48 | 0.181 | -1.28 |
| 1452206_at   | Suc1a2            | succinate-Coenzyme A ligase, ADP-forming, beta subunit                 | -1.15 | 0.24  | -1.24 | 0.026 | -1.19 | 0.181 | -1.13 | 0.08  | -1.18 |
| 1434485_a_at | Ugp2              | UDP-glucose pyrophosphorylase 2                                        | -1.19 | 0.077 | -1.34 | 0.206 | -1.08 | 0.527 | -1.16 | 0.556 | -1.19 |
| 1451199_at   | Qtrtd1            | queuine tRNA-ribosyltransferase domain containing 1                    | -1.29 | 0.094 | -1.27 | 0.487 | -1.05 | 0.724 | -1.35 | 0.117 | -1.24 |
| 1438736_at   | Thoc2             | THO complex 2                                                          | -1.1  | 0.557 | -1.13 | 0.125 | -1.38 | 0.045 | -1.07 | 0.815 | -1.17 |
| 1433942_at   | Myo6              | myosin VI                                                              | -1.1  | 0.299 | -1.34 | 0.01  | -1.16 | 0.491 | -1.17 | 0.015 | -1.19 |
| 1453776_at   | 5730407K14Rik     | RIKEN cDNA 5730407K14 gene                                             | -1.1  | 0.399 | -1.18 | 0.449 | -1.32 | 0.176 | -1.38 | 0.002 | -1.24 |
| 1447423_at   | ---               | ---                                                                    | -1.24 | 0.46  | -1.01 | 0.98  | -1.39 | 0.145 | -1.06 | 0.906 | -1.17 |
| 1453701_at   | 4921515E04Rik     | RIKEN cDNA 4921515E04 gene                                             | -1.33 | 0.693 | -1.17 | 0.789 | -1.09 | 0.667 | -3.04 | 0.02  | -1.66 |
| 1456761_at   | D630030B22Rik     | RIKEN cDNA D630030B22 gene                                             | -1.37 | 0.433 | -1.16 | 0.674 | -1.08 | 0.807 | -1.06 | 0.892 | -1.17 |
| 1450043_at   | Fzd7              | frizzled homolog 7 (Drosophila)                                        | -1.04 | 0.889 | -1.51 | 0.502 | -1.12 | 0.557 | -1.5  | 0.195 | -1.29 |
| 1441331_at   | A230061C15Rik     | RIKEN cDNA A230061C15 gene                                             | -1.13 | 0.256 | -1.06 | 0.595 | -1.46 | 0.077 | -1.84 | 0.172 | -1.37 |
| 1454822_x_at | Apccdd1           | adenomatosis polyposis coli down-regulated 1                           | -1.35 | 0.313 | -1.01 | 0.968 | -1.27 | 0.587 | -1.24 | 0.385 | -1.22 |
| 1458607_at   | Tgfb2             | Transforming growth factor, beta receptor II                           | -1.05 | 0.933 | -1.18 | 0.754 | -1.39 | 0.088 | -1.61 | 0.136 | -1.31 |
| 1452708_a_at | Luc7l             | Luc7 homolog (S. cerevisiae)-like                                      | -1.16 | 0.723 | -1.13 | 0.509 | -1.29 | 0.083 | -1.13 | 0.668 | -1.18 |
| 1427269_at   | Sfrs11            | splicing factor, arginine/serine-rich 11                               | -1.21 | 0.451 | -1.24 | 0.088 | -1.13 | 0.222 | -1.14 | 0.35  | -1.18 |
| 1424519_at   | Mtg1              | mitochondrial GTPase 1 homolog (S. cerevisiae)                         | -1.12 | 0.354 | -1.38 | 0.009 | -1.11 | 0.462 | -1.02 | 0.788 | -1.16 |
| 1446483_at   | Akr1e1            | aldo-keto reductase family 1, member E1                                | -1.08 | 0.657 | -1.32 | 0.195 | -1.2  | 0.491 | -1.8  | 0.344 | -1.35 |
| 1417007_a_at | Vps4b             | vacuolar protein sorting 4b (yeast)                                    | -1.2  | 0.438 | -1.25 | 0.05  | -1.13 | 0.252 | -1.48 | 0.114 | -1.26 |
| 1416978_at   | Fcgrt             | Fc receptor, IgG, alpha chain transporter                              | -1.1  | 0.437 | -1.15 | 0.096 | -1.36 | 0.204 | -1.03 | 0.932 | -1.16 |
| 1449055_x_at | Pcbp4             | poly(rC) binding protein 4                                             | -1.29 | 0.119 | -1.08 | 0.645 | -1.22 | 0.002 | -1.59 | 0.121 | -1.3  |
| 1427484_at   | Eml5              | echinoderm microtubule associated protein like 5                       | -1.26 | 0.004 | -1.15 | 0.476 | -1.17 | 0.726 | -1.11 | 0.594 | -1.17 |
| 1445163_at   | ---               | ---                                                                    | -1.25 | 0.808 | -1.27 | 0.416 | -1.07 | 0.655 | -1.04 | 0.964 | -1.16 |
| 1457082_at   | Foxp3             | forkhead box P3                                                        | -1.38 | 0.688 | -1.05 | 0.929 | -1.19 | 0.552 | -2.4  | 0.068 | -1.5  |
| 1457176_at   | Garnl1            | GTPase activating RANGAP domain-like 1                                 | -1.07 | 0.521 | -1.23 | 0.382 | -1.29 | 0.238 | -1.44 | 0.18  | -1.26 |
| 1431638_at   | 4930592A05Rik     | RIKEN cDNA 4930592A05 gene                                             | -1.01 | 0.824 | -1.35 | 0.194 | -1.26 | 0.552 | -1.77 | 0.247 | -1.35 |
| 1460411_s_at | AW548124          | expressed sequence AW548124                                            | -1.24 | 0.232 | -1.35 | 0.163 | -1.02 | 0.904 | -1.35 | 0.424 | -1.24 |
| 1438283_at   | 3110057O12Rik     | RIKEN cDNA 3110057O12 gene                                             | -1.39 | 0.301 | -1.05 | 0.89  | -1.18 | 0.429 | -1    | 0.99  | -1.16 |
| 1422595_s_at | 5730470L24Rik     | RIKEN cDNA 5730470L24 gene                                             | -1.06 | 0.736 | -1.13 | 0.163 | -1.44 | 0.009 | -1.52 | 0.207 | -1.29 |

|              |                    |                                                                                           |       |       |       |       |       |       |       |       |       |
|--------------|--------------------|-------------------------------------------------------------------------------------------|-------|-------|-------|-------|-------|-------|-------|-------|-------|
| 1460663_at   | Cckbr              | cholecystokinin B receptor                                                                | -1.15 | 0.109 | -1.05 | 0.677 | -1.43 | 0.554 | -1.24 | 0.487 | -1.22 |
| 1456548_at   | Mtdh               | Metadherin                                                                                | -1.04 | 0.951 | -1.28 | 0.166 | -1.28 | 0.285 | -1.15 | 0.528 | -1.19 |
| 1448271_a_at | Ddx21              | DEAD (Asp-Glu-Ala-Asp) box polypeptide 21                                                 | -1.36 | 0.043 | -1.18 | 0.01  | -1.07 | 0.659 | -1.09 | 0.719 | -1.17 |
| 1438868_at   | D14Ert668e         | DNA segment, Chr 14, ERATO Doi 668, expressed                                             | -1.43 | 0.052 | -1.08 | 0.317 | -1.12 | 0.497 | -1.79 | 0.053 | -1.35 |
| 1416056_a_at | Ndufb11            | NADH dehydrogenase (ubiquinone) 1 beta subcomplex, 11                                     | -1.1  | 0.135 | -1.17 | 0.069 | -1.31 | 0.025 | -1.26 | 0.265 | -1.21 |
| 1460391_at   | 2810409H07Rik      | RIKEN cDNA 2810409H07 gene                                                                | -1.18 | 0.436 | -1.19 | 0.028 | -1.19 | 0.51  | -1.07 | 0.809 | -1.16 |
| 1457889_at   | AU014972           | expressed sequence AU014972                                                               | -1.01 | 0.974 | -1.18 | 0.687 | -1.47 | 0.124 | -1.14 | 0.469 | -1.2  |
| 1441003_at   | Ercc4              | excision repair cross-complementing rodent repair deficiency, complementation g           | -1.26 | 0.437 | -1.08 | 0.775 | -1.24 | 0.257 | -1.22 | 0.569 | -1.2  |
| 1455729_at   | Gnaq               | guanine nucleotide binding protein, alpha q polypeptide                                   | -1.11 | 0.535 | -1.08 | 0.573 | -1.44 | 0.011 | -1.2  | 0.582 | -1.21 |
| 1455717_s_at | Daam2              | dishevelled associated activator of morphogenesis 2                                       | -1.11 | 0.546 | -1.07 | 0.635 | -1.45 | 0.333 | -1.06 | 0.636 | -1.17 |
| 1450937_at   | Lin7c              | lin-7 homolog C (C. elegans)                                                              | -1.29 | 0.12  | -1.05 | 0.659 | -1.26 | 0.128 | -1.4  | 0.132 | -1.25 |
| 1421852_at   | Kcnk5              | potassium channel, subfamily K, member 5                                                  | -1.31 | 0.379 | -1.31 | 0.484 | -1    | 0.983 | -1.48 | 0.26  | -1.28 |
| 1437240_at   | Pgm2               | phosphoglucomutase 2                                                                      | -1.16 | 0.542 | -1.38 | 0.211 | -1.06 | 0.833 | -1.67 | 0.272 | -1.32 |
| 1456383_at   | Rsl1d1             | ribosomal L1 domain containing 1                                                          | -1.29 | 0.146 | -1.27 | 0.004 | -1.05 | 0.813 | -1.1  | 0.763 | -1.17 |
| 1438506_s_at | Pdss1              | Prenyl (solanesyl) diphosphate synthase, subunit 1                                        | -1.25 | 0.49  | -1.06 | 0.708 | -1.29 | 0.224 | -1.77 | 0.113 | -1.34 |
| 1428921_at   | 2810021B07Rik      | RIKEN cDNA 2810021B07 gene                                                                | -1.05 | 0.625 | -1.2  | 0.348 | -1.36 | 0.023 | -1.24 | 0.382 | -1.21 |
| 1417766_at   | Cyb5b              | cytochrome b5 type B                                                                      | -1.2  | 0.12  | -1.1  | 0.402 | -1.28 | 0.041 | -1.3  | 0.238 | -1.22 |
| 1458077_at   | Baz2b              | Bromodomain adjacent to zinc finger domain, 2B                                            | -1.11 | 0.678 | -1.25 | 0.134 | -1.22 | 0.353 | -1.74 | 0.192 | -1.33 |
| 1427097_at   | Wwp1               | WW domain containing E3 ubiquitin protein ligase 1                                        | -1.21 | 0.135 | -1.17 | 0.044 | -1.18 | 0.294 | -1.17 | 0.44  | -1.18 |
| 1418007_at   | 1810007M14Rik      | RIKEN cDNA 1810007M14 gene                                                                | -1.33 | 0.309 | -1.15 | 0.328 | -1.11 | 0.59  | -1.23 | 0.432 | -1.2  |
| 1447964_at   | Ttl                | tubulin tyrosine ligase                                                                   | -1.25 | 0.436 | -1.28 | 0.541 | -1.06 | 0.873 | -1.34 | 0.582 | -1.23 |
| 1435106_at   | 3732412D22Rik      | RIKEN cDNA 3732412D22 gene                                                                | -1.19 | 0.19  | -1.02 | 0.912 | -1.42 | 0.102 | -1.67 | 0.168 | -1.33 |
| 1451495_at   | Wac                | WW domain containing adaptor with coiled-coil                                             | -1.18 | 0.292 | -1.14 | 0.242 | -1.25 | 0.125 | -1.12 | 0.106 | -1.17 |
| 1431467_at   | 4931402G19Rik      | RIKEN cDNA 4931402G19 gene                                                                | -1.43 | 0     | -1.16 | 0.656 | -1.04 | 0.684 | -1.73 | 0.533 | -1.34 |
| 1435164_s_at | Ube1c              | ubiquitin-activating enzyme E1C                                                           | -1.32 | 0.171 | -1.08 | 0.507 | -1.2  | 0.229 | -1.19 | 0.413 | -1.19 |
| 1438390_s_at | Pttg1              | pituitary tumor-transforming 1                                                            | -1.09 | 0.342 | -1.28 | 0.147 | -1.21 | 0.037 | -1.17 | 0.33  | -1.19 |
| 1427542_at   | 5330439J01Rik      | RIKEN cDNA 5330439J01 gene                                                                | -1.08 | 0.663 | -1.4  | 0.224 | -1.14 | 0.655 | -1.24 | 0.22  | -1.21 |
| 1448702_at   | Ier3ip1            | immediate early response 3 interacting protein 1                                          | -1.18 | 0.087 | -1.03 | 0.642 | -1.42 | 0.001 | -1.08 | 0.618 | -1.18 |
| 1430318_at   | Sat2               | spermidine/spermine N1-acetyl transferase 2                                               | -1.24 | 0.299 | -1.11 | 0.009 | -1.22 | 0.269 | -1.23 | 0.277 | -1.2  |
| 1418515_at   | Mtf2               | metal response element binding transcription factor 2                                     | -1.07 | 0.636 | -1.28 | 0.091 | -1.24 | 0.299 | -1.02 | 0.884 | -1.15 |
| 1455387_at   | Nufip2             | nuclear fragile X mental retardation protein interacting protein 2                        | -1.14 | 0.352 | -1.04 | 0.695 | -1.46 | 0.078 | -1.25 | 0.576 | -1.22 |
| 1428826_at   | Nr6a1              | nuclear receptor subfamily 6, group A, member 1                                           | -1.02 | 0.705 | -1.51 | 0.051 | -1.13 | 0.375 | -1.1  | 0.843 | -1.19 |
| 1456729_x_at | Rtel1              | regulator of telomere elongation helicase 1                                               | -1.14 | 0.698 | -1.42 | 0.094 | -1.06 | 0.773 | -1.23 | 0.196 | -1.21 |
| 1441981_at   | Tmprss11f          | transmembrane protease, serine 11f                                                        | -1.08 | 0.922 | -1.36 | 0.646 | -1.16 | 0.721 | -2.24 | 0.117 | -1.46 |
| 1421089_a_at | 2610028A01Rik      | RIKEN cDNA 2610028A01 gene                                                                | -1.11 | 0.431 | -1.24 | 0.509 | -1.22 | 0.506 | -1.26 | 0.116 | -1.21 |
| 1455077_a_at | Morf4l1 /// LOC433 | mortality factor 4 like 1 /// similar to mortality factor 4 like 1 isoform b /// RIKEN cD | -1.14 | 0.043 | -1.07 | 0.154 | -1.4  | 0.005 | -1.24 | 0.05  | -1.21 |
| 1423504_at   | Jam3               | junction adhesion molecule 3                                                              | -1.05 | 0.782 | -1.01 | 0.977 | -1.72 | 0.109 | -1.35 | 0.531 | -1.28 |
| 1434481_at   | 4121402D02Rik      | RIKEN cDNA 4121402D02 gene                                                                | -1.09 | 0.606 | -1.31 | 0.084 | -1.19 | 0.039 | -1.14 | 0.323 | -1.18 |
| 1421993_a_at | Tmem134            | transmembrane protein 134                                                                 | -1.23 | 0.459 | -1.25 | 0.36  | -1.09 | 0.789 | -1.24 | 0.605 | -1.2  |
| 1418313_at   | Zfp276             | zinc finger protein (C2H2 type) 276                                                       | -1.31 | 0.375 | -1.25 | 0.344 | -1.04 | 0.729 | -1.14 | 0.704 | -1.19 |
| 1428282_at   | Tbce               | tubulin-specific chaperone e                                                              | -1.18 | 0.384 | -1.11 | 0.316 | -1.29 | 0.069 | -1.23 | 0.216 | -1.2  |
| 1431726_a_at | Tmem80             | transmembrane protein 80                                                                  | -1.12 | 0.645 | -1.25 | 0.021 | -1.19 | 0.237 | -1.06 | 0.25  | -1.16 |
| 1445321_at   | E430025E21Rik      | RIKEN cDNA E430025E21 gene                                                                | -1.03 | 0.907 | -1.49 | 0.01  | -1.13 | 0.47  | -1.33 | 0.426 | -1.25 |
| 1437322_at   | Rbm4               | RNA binding motif protein 4                                                               | -1.08 | 0.582 | -1.21 | 0.394 | -1.29 | 0.304 | -1.09 | 0.183 | -1.17 |
| 1428149_at   | Coro7              | coronin 7                                                                                 | -1.03 | 0.93  | -1.29 | 0.04  | -1.29 | 0.137 | -1.71 | 0.121 | -1.33 |
| 1453518_at   | Pdzd11             | PDZ domain containing 11                                                                  | -1.57 | 0.056 | -1.01 | 0.988 | -1.12 | 0.778 | -1.32 | 0.441 | -1.25 |
| 1435302_at   | Taf4b              | TAF4B RNA polymerase II, TATA box binding protein (TBP)-associated factor                 | -1.23 | 0.607 | -1.07 | 0.775 | -1.29 | 0.101 | -1.14 | 0.303 | -1.18 |
| 1417285_a_at | Ndufa5             | NADH dehydrogenase (ubiquinone) 1 alpha subcomplex, 5                                     | -1.11 | 0.082 | -1.15 | 0.234 | -1.32 | 0.009 | -1.11 | 0.434 | -1.17 |
| 1443205_at   | D5Buc30e           | DNA segment, Chr 5, Bucan 30 expressed                                                    | -1.5  | 0.291 | -1.06 | 0.858 | -1.09 | 0.846 | -1.18 | 0.714 | -1.21 |
| 1438591_at   | 2610019A05Rik      | RIKEN cDNA 2610019A05 gene                                                                | -1.33 | 0.278 | -1.11 | 0.76  | -1.14 | 0.63  | -1.32 | 0.11  | -1.23 |
| 1436667_at   | Slc6a20            | solute carrier family 6 (neurotransmitter transporter), member 20                         | -1.09 | 0.502 | -1.06 | 0.853 | -1.51 | 0.397 | -1.23 | 0.166 | -1.22 |
| 1435070_at   | Aebp2              | AE binding protein 2                                                                      | -1.1  | 0.602 | -1.1  | 0.328 | -1.41 | 0.068 | -1.28 | 0.162 | -1.22 |
| 1443520_at   | AU022870           | Expressed sequence AU022870                                                               | -1.02 | 0.936 | -1.23 | 0.469 | -1.36 | 0.32  | -1.15 | 0.669 | -1.19 |

|              |               |                                                                                 |       |       |       |       |       |       |       |       |       |
|--------------|---------------|---------------------------------------------------------------------------------|-------|-------|-------|-------|-------|-------|-------|-------|-------|
| 1460744_at   | 2810002I04Rik | RIKEN cDNA 2810002I04 gene                                                      | -1.11 | 0.61  | -1.02 | 0.968 | -1.55 | 0.184 | -1.53 | 0.307 | -1.3  |
| 1438296_at   | C430010C01    | hypothetical protein C430010C01                                                 | -1.2  | 0.576 | -1.41 | 0.501 | -1.02 | 0.963 | -2.11 | 0.165 | -1.43 |
| 1420023_at   | Etf1          | eukaryotic translation termination factor 1                                     | -1.39 | 0.03  | -1.09 | 0.739 | -1.12 | 0.566 | -1.01 | 0.958 | -1.15 |
| 1434941_s_at | 2610101J03Rik | RIKEN cDNA 2610101J03 gene                                                      | -1.06 | 0.766 | -1.09 | 0.531 | -1.5  | 0.021 | -1.06 | 0.716 | -1.18 |
| 1442355_at   | LOC546100     | hypothetical LOC546100                                                          | -1.05 | 0.653 | -1.59 | 0.535 | -1.06 | 0.823 | -1.26 | 0.053 | -1.24 |
| 1440909_at   | Irgc1         | immunity-related GTPase family, cinema 1                                        | -1.07 | 0.826 | -1.47 | 0.476 | -1.1  | 0.542 | -1.01 | 0.965 | -1.16 |
| 1416107_at   | Nsg2          | neuron specific gene family member 2                                            | -1.29 | 0.255 | -1.11 | 0.857 | -1.18 | 0.685 | -2.66 | 0.037 | -1.56 |
| 1435689_at   | 9030025P20Rik | RIKEN cDNA 9030025P20 gene                                                      | -1.21 | 0.269 | -1.28 | 0.059 | -1.08 | 0.632 | -1.65 | 0.075 | -1.31 |
| 1441613_at   | 1110033F14Rik | RIKEN cDNA 1110033F14 gene                                                      | -1.23 | 0.458 | -1.24 | 0.724 | -1.1  | 0.714 | -1.57 | 0.304 | -1.28 |
| 1454945_at   | Lrriq2        | leucine-rich repeats and IQ motif containing 2                                  | -1.07 | 0.425 | -1.34 | 0.367 | -1.18 | 0.382 | -1.37 | 0.183 | -1.24 |
| 1456220_at   | Fbxl7         | F-box and leucine-rich repeat protein 7                                         | -1.27 | 0.407 | -1.14 | 0.767 | -1.16 | 0.347 | -1.6  | 0.07  | -1.29 |
| 1446053_at   | Gpkow         | G patch domain and KOW motifs                                                   | -1.3  | 0.177 | -1.2  | 0.678 | -1.08 | 0.69  | -1.25 | 0.173 | -1.21 |
| 1438668_x_at | Atxn2l        | ataxin 2-like                                                                   | -1.35 | 0.022 | -1.19 | 0.145 | -1.06 | 0.389 | -1.04 | 0.794 | -1.16 |
| 1449515_at   | Zfp292        | zinc finger protein 292                                                         | -1.18 | 0.275 | -1.05 | 0.752 | -1.37 | 0.038 | -1.69 | 0.136 | -1.32 |
| 1428038_at   | Gm568         | gene model 568, (NCBI)                                                          | -1.16 | 0.872 | -1.18 | 0.745 | -1.22 | 0.651 | -1.31 | 0.313 | -1.22 |
| 1437131_x_at | Mrpl11        | mitochondrial ribosomal protein L11                                             | -1.01 | 0.892 | -1.44 | 0.089 | -1.18 | 0.716 | -1.27 | 0.228 | -1.22 |
| 1447689_at   | Gprasp1       | G protein-coupled receptor associated sorting protein 1                         | -1.5  | 0.696 | -1.15 | 0.6   | -1.01 | 0.977 | -1.76 | 0.399 | -1.36 |
| 1416971_at   | Cox7a2        | cytochrome c oxidase, subunit VIIa 2                                            | -1.13 | 0.06  | -1.25 | 0.012 | -1.18 | 0.012 | -1.1  | 0.529 | -1.16 |
| 1453702_at   | Ccdc105       | coiled-coil domain containing 105                                               | -1.03 | 0.971 | -1.51 | 0.482 | -1.11 | 0.865 | -1.6  | 0.465 | -1.31 |
| 1418390_at   | Phf21a        | PHD finger protein 21A                                                          | -1.07 | 0.444 | -1.29 | 0.268 | -1.22 | 0.129 | -1.81 | 0.121 | -1.35 |
| 1443038_at   | ---           | ---                                                                             | -1.31 | 0.547 | -1.05 | 0.873 | -1.22 | 0.109 | -1.35 | 0.108 | -1.23 |
| 1453420_at   | 1700013G10Rik | RIKEN cDNA 1700013G10 gene                                                      | -1.15 | 0.454 | -1.06 | 0.869 | -1.4  | 0.078 | -1.53 | 0.34  | -1.28 |
| 1448063_at   | lqsec2        | IQ motif and Sec7 domain 2                                                      | -1.1  | 0.542 | -1.22 | 0.367 | -1.24 | 0.486 | -2.12 | 0.123 | -1.42 |
| 1421295_at   | Chrdl1        | chordin-like 1                                                                  | -1.27 | 0.475 | -1.34 | 0.509 | -1.01 | 0.985 | -1.42 | 0.157 | -1.26 |
| 1431494_at   | A930008B05Rik | RIKEN cDNA A930008B05 gene                                                      | -1.06 | 0.885 | -1.68 | 0.366 | -1.01 | 0.953 | -1.83 | 0.122 | -1.39 |
| 1444638_at   | Ttn           | titin                                                                           | -1.59 | 0.116 | -1.02 | 0.941 | -1.09 | 0.692 | -1.21 | 0.444 | -1.23 |
| 1435541_at   | Btc           | betacellulin, epidermal growth factor family member                             | -1.37 | 0.295 | -1.17 | 0.661 | -1.06 | 0.714 | -1.08 | 0.845 | -1.17 |
| 1452867_at   | Col4a3bp      | procollagen, type IV, alpha 3 (Goodpasture antigen) binding protein             | -1.24 | 0.237 | -1.11 | 0.25  | -1.22 | 0.074 | -1.19 | 0.348 | -1.19 |
| 1452335_at   | 2810423E13Rik | RIKEN cDNA 2810423E13 gene                                                      | -1.22 | 0.278 | -1.37 | 0.166 | -1.02 | 0.935 | -1.42 | 0.347 | -1.26 |
| 1417102_a_at | Ndufb5        | NADH dehydrogenase (ubiquinone) 1 beta subcomplex, 5                            | -1.08 | 0.221 | -1.2  | 0.144 | -1.29 | 0.033 | -1.38 | 0.221 | -1.24 |
| 1449745_at   | ---           | Transcribed locus                                                               | -1.17 | 0.598 | -1.2  | 0.401 | -1.19 | 0.453 | -1.24 | 0.354 | -1.2  |
| 1427984_at   | Senp6         | SUMO/sentrin specific peptidase 6                                               | -1.11 | 0.774 | -1.47 | 0.499 | -1.06 | 0.794 | -1.01 | 0.965 | -1.16 |
| 1420608_at   | Rbm18         | RNA binding motif protein 18                                                    | -1.27 | 0.258 | -1.06 | 0.453 | -1.24 | 0.005 | -1.19 | 0.381 | -1.19 |
| 1426829_at   | Rxrip110      | retinoid X receptor interacting protein 110                                     | -1.16 | 0.514 | -1.17 | 0.058 | -1.22 | 0.099 | -1.28 | 0.184 | -1.21 |
| 1459080_at   | ---           | ---                                                                             | -1.26 | 0.611 | -1.08 | 0.761 | -1.23 | 0.646 | -1.05 | 0.901 | -1.16 |
| 1457746_at   | 2610028H07Rik | RIKEN cDNA 2610028H07 gene                                                      | -1.08 | 0.6   | -1.26 | 0.022 | -1.23 | 0.406 | -1.57 | 0.044 | -1.29 |
| 1437158_at   | Nipbl         | Nipped-B homolog (Drosophila)                                                   | -1.11 | 0.409 | -1.17 | 0.324 | -1.29 | 0.232 | -1.16 | 0.4   | -1.18 |
| 1451275_at   | E030041M21Rik | RIKEN cDNA E030041M21 gene                                                      | -1.25 | 0.124 | -1.12 | 0.385 | -1.19 | 0.103 | -1.27 | 0.358 | -1.21 |
| 1434106_at   | Epm2aip1      | EPM2A (laforin) interacting protein 1                                           | -1.13 | 0.232 | -1.14 | 0.462 | -1.3  | 0.114 | -1.31 | 0.211 | -1.22 |
| 1451153_a_at | Cyhr1         | cysteine and histidine rich 1                                                   | -1.17 | 0.442 | -1.19 | 0.296 | -1.19 | 0.267 | -1.31 | 0.08  | -1.22 |
| 1416979_at   | Pomp          | proteasome maturation protein                                                   | -1.23 | 0.031 | -1.16 | 0.019 | -1.17 | 0.278 | -1.29 | 0.147 | -1.21 |
| 1443942_at   | Gabpb2        | GA repeat binding protein, beta 2                                               | -1.36 | 0.306 | -1.19 | 0.663 | -1.05 | 0.841 | -1.38 | 0.25  | -1.24 |
| 1434796_at   | Vamp4         | vesicle-associated membrane protein 4                                           | -1.19 | 0.26  | -1.12 | 0.31  | -1.25 | 0.335 | -1.72 | 0.105 | -1.32 |
| 1416379_at   | Panx1         | pannexin 1                                                                      | -1.33 | 0.045 | -1.23 | 0.766 | -1.04 | 0.86  | -2.11 | 0.142 | -1.43 |
| 1433654_at   | Mgea5         | meningioma expressed antigen 5 (hyaluronidase)                                  | -1.13 | 0.557 | -1.32 | 0.14  | -1.12 | 0.391 | -1.33 | 0.285 | -1.23 |
| 1421022_x_at | Acyp1         | acylphosphatase 1, erythrocyte (common) type                                    | -1.39 | 0.097 | -1.14 | 0.2   | -1.07 | 0.534 | -1.2  | 0.531 | -1.2  |
| 1459117_at   | ---           | Transcribed locus                                                               | -1.11 | 0.591 | -1.35 | 0.512 | -1.12 | 0.685 | -2.14 | 0.077 | -1.43 |
| 1444173_at   | ---           | 8 days neonate male testis cDNA, RIKEN full-length enriched library, clone:G630 | -1.26 | 0.752 | -1.22 | 0.655 | -1.09 | 0.818 | -1.18 | 0.709 | -1.19 |
| 1459623_at   | ---           | ---                                                                             | -1.12 | 0.777 | -1.53 | 0.439 | -1.01 | 0.986 | -1.23 | 0.784 | -1.22 |
| 1451403_at   | BC024868      | cDNA sequence BC024868                                                          | -1.03 | 0.905 | -1.4  | 0.01  | -1.18 | 0.443 | -1.18 | 0.592 | -1.2  |
| 1417555_at   | Atad1         | ATPase family, AAA domain containing 1                                          | -1.15 | 0.555 | -1.17 | 0.453 | -1.23 | 0.237 | -1.19 | 0.404 | -1.19 |
| 1434806_at   | Mtx3          | metaxin 3                                                                       | -1.4  | 0.238 | -1.1  | 0.561 | -1.1  | 0.627 | -1.34 | 0.57  | -1.24 |
| 1420532_at   | Magi2         | membrane associated guanylate kinase, WW and PDZ domain containing 2            | -1.21 | 0.422 | -1.2  | 0.725 | -1.14 | 0.33  | -1.48 | 0.2   | -1.26 |

|              |                   |                                                                                 |       |       |       |       |       |       |       |       |       |
|--------------|-------------------|---------------------------------------------------------------------------------|-------|-------|-------|-------|-------|-------|-------|-------|-------|
| 1437981_x_at | 1110057K04Rik     | RIKEN cDNA 1110057K04 gene                                                      | -1.14 | 0.581 | -1.3  | 0.61  | -1.13 | 0.254 | -1.03 | 0.94  | -1.15 |
| 1455502_at   | Madd              | MAP-kinase activating death domain                                              | -1.14 | 0.596 | -1.46 | 0.1   | -1.03 | 0.887 | -1.67 | 0.059 | -1.32 |
| 1433957_at   | C030048B08Rik     | RIKEN cDNA C030048B08 gene                                                      | -1.08 | 0.573 | -1.1  | 0.597 | -1.42 | 0.237 | -1.46 | 0.061 | -1.27 |
| 1438971_x_at | Ube2h             | ubiquitin-conjugating enzyme E2H                                                | -1.31 | 0.004 | -1.21 | 0.25  | -1.06 | 0.725 | -1.06 | 0.562 | -1.16 |
| 1424398_at   | Dhx36             | DEAH (Asp-Glu-Ala-His) box polypeptide 36                                       | -1.01 | 0.988 | -1.36 | 0.038 | -1.24 | 0.391 | -1.14 | 0.682 | -1.19 |
| 1456303_at   | Phf14             | PHD finger protein 14                                                           | -1.01 | 0.954 | -1.11 | 0.311 | -1.55 | 0.026 | -1.22 | 0.071 | -1.22 |
| 1452986_at   | Hgd               | homogentisate 1, 2-dioxygenase                                                  | -1.16 | 0.309 | -1.24 | 0.242 | -1.15 | 0.683 | -1.13 | 0.819 | -1.17 |
| 1455483_at   | Zfp148            | zinc finger protein 148                                                         | -1.23 | 0.184 | -1.08 | 0.334 | -1.26 | 0.215 | -1.07 | 0.367 | -1.16 |
| 1428240_at   | Nrxn1             | neurexin I                                                                      | -1.17 | 0.77  | -1.17 | 0.517 | -1.21 | 0.259 | -1.16 | 0.091 | -1.18 |
| 1459062_x_at | AU041133          | Expressed sequence AU041133                                                     | -1.1  | 0.906 | -1.18 | 0.699 | -1.29 | 0.107 | -1.35 | 0.312 | -1.23 |
| 1440183_x_at | Coq9              | Coenzyme Q9 homolog (yeast)                                                     | -1.19 | 0.254 | -1.18 | 0.154 | -1.18 | 0.452 | -1.35 | 0.263 | -1.23 |
| 1432784_at   | 4930556A17Rik     | RIKEN cDNA 4930556A17 gene                                                      | -1.33 | 0.456 | -1.21 | 0.745 | -1.05 | 0.935 | -1.34 | 0.536 | -1.23 |
| 1450954_at   | Yme11             | YME1-like 1 (S. cerevisiae)                                                     | -1.15 | 0.256 | -1.2  | 0.185 | -1.2  | 0.117 | -1    | 0.966 | -1.14 |
| 1436656_at   | BC062109          | cDNA sequence BC062109                                                          | -1.04 | 0.848 | -1.37 | 0.646 | -1.19 | 0.377 | -1.48 | 0.312 | -1.27 |
| 1416000_a_at | Prdx1             | peroxiredoxin 1                                                                 | -1.22 | 0.13  | -1.13 | 0.44  | -1.21 | 0.018 | -1.2  | 0.147 | -1.19 |
| 1427075_s_at | Pcmtd2            | protein-L-isoaspartate (D-aspartate) O-methyltransferase domain containing 2    | -1.34 | 0.223 | -1.04 | 0.775 | -1.21 | 0.193 | -1.28 | 0.061 | -1.22 |
| 1436284_s_at | Zfp319            | zinc finger protein 319                                                         | -1.11 | 0.377 | -1.15 | 0.502 | -1.3  | 0.111 | -1.17 | 0.466 | -1.18 |
| 1432403_at   | 4933402C06Rik     | RIKEN cDNA 4933402C06 gene                                                      | -1    | 1     | -1.38 | 0.675 | -1.23 | 0.249 | -1.42 | 0.458 | -1.26 |
| 1430222_at   | 9130007G19Rik     | RIKEN cDNA 9130007G19 gene                                                      | -1.27 | 0.385 | -1    | 0.998 | -1.34 | 0.153 | -2.76 | 0.001 | -1.59 |
| 1451442_at   | Ccdc104           | coiled-coil domain containing 104                                               | -1.1  | 0.502 | -1.34 | 0.09  | -1.14 | 0.301 | -1.05 | 0.54  | -1.16 |
| 1433643_at   | Cacna2d1          | calcium channel, voltage-dependent, alpha2/delta subunit 1                      | -1.1  | 0.603 | -1.08 | 0.665 | -1.43 | 0.219 | -1.02 | 0.952 | -1.16 |
| 1456204_at   | 2010107H07Rik     | RIKEN cDNA 2010107H07 gene                                                      | -1.02 | 0.527 | -1.17 | 0.385 | -1.41 | 0.077 | -1.03 | 0.892 | -1.16 |
| 1446481_at   | Apbb2             | Amyloid beta (A4) precursor protein-binding, family B, member 2                 | -1.04 | 0.907 | -1.04 | 0.912 | -1.62 | 0.165 | -1.58 | 0.211 | -1.32 |
| 1447853_x_at | Kif13a            | Kinesin family member 13A                                                       | -1.03 | 0.303 | -1.35 | 0.554 | -1.21 | 0.168 | -1.02 | 0.955 | -1.15 |
| 1438756_at   | Ankrd29           | ankyrin repeat domain 29                                                        | -1.08 | 0.749 | -1.15 | 0.605 | -1.35 | 0.278 | -1.66 | 0.178 | -1.31 |
| 1431701_a_at | Pdzk1             | PDZ domain containing 1                                                         | -1.12 | 0.339 | -1.26 | 0.06  | -1.18 | 0.436 | -2.05 | 0.306 | -1.4  |
| 1448518_at   | Timm22            | translocase of inner mitochondrial membrane 22 homolog (yeast)                  | -1.27 | 0.388 | -1.28 | 0.423 | -1.03 | 0.766 | -1.05 | 0.741 | -1.16 |
| 1441796_at   | 2010309E21Rik     | RIKEN cDNA 2010309E21 gene                                                      | -1.27 | 0.576 | -1.31 | 0.004 | -1.02 | 0.959 | -1.11 | 0.76  | -1.18 |
| 1449664_s_at | Rnf20             | ring finger protein 20                                                          | -1.33 | 0.088 | -1.04 | 0.688 | -1.21 | 0.206 | -1.1  | 0.398 | -1.17 |
| 1457472_at   | Tnrc15            | trinucleotide repeat containing 15                                              | -1.14 | 0.476 | -1.11 | 0.536 | -1.32 | 0.155 | -1.1  | 0.61  | -1.17 |
| 1438080_at   | Mrpl11            | mitochondrial ribosomal protein L11                                             | -1.13 | 0.858 | -1.53 | 0.029 | -1    | 1     | -1.29 | 0.354 | -1.24 |
| 1434732_x_at | Tomm7             | Translocase of outer mitochondrial membrane 7 homolog (yeast)                   | -1.26 | 0.196 | -1.08 | 0.654 | -1.23 | 0.358 | -1.17 | 0.499 | -1.18 |
| 1443335_at   | Pdzn3             | PDZ domain containing RING finger 3                                             | -1.06 | 0.792 | -1.13 | 0.589 | -1.41 | 0.088 | -1.2  | 0.549 | -1.2  |
| 1437924_at   | ---               | ---                                                                             | -1.24 | 0.143 | -1.33 | 0.045 | -1.02 | 0.856 | -1.03 | 0.653 | -1.16 |
| 1456120_at   | 3110001I20Rik     | RIKEN cDNA 3110001I20 gene                                                      | -1.05 | 0.757 | -1.38 | 0.452 | -1.17 | 0.724 | -1.37 | 0.495 | -1.24 |
| 1433597_at   | 9430010O03Rik     | RIKEN cDNA 9430010O03 gene                                                      | -1.23 | 0.386 | -1.11 | 0.525 | -1.21 | 0.401 | -1.08 | 0.724 | -1.16 |
| 1439210_at   | Mrps9             | mitochondrial ribosomal protein S9                                              | -1.21 | 0.062 | -1.02 | 0.861 | -1.36 | 0.335 | -1.27 | 0.318 | -1.22 |
| 1436115_at   | Gm266             | gene model 266, (NCBI)                                                          | -1.45 | 0.262 | -1.05 | 0.905 | -1.11 | 0.808 | -3.02 | 0.042 | -1.66 |
| 1444679_at   | Phf21a            | PHD finger protein 21A                                                          | -1.04 | 0.901 | -1.05 | 0.739 | -1.6  | 0.07  | -1.19 | 0.439 | -1.22 |
| 1455664_at   | Rtn4rl1           | reticulon 4 receptor-like 1                                                     | -1.17 | 0.445 | -1.37 | 0.352 | -1.05 | 0.823 | -1.77 | 0.121 | -1.34 |
| 1442528_at   | Xpo4              | exportin 4                                                                      | -1.28 | 0.112 | -1.13 | 0.665 | -1.14 | 0.733 | -1.16 | 0.686 | -1.18 |
| 1457696_at   | Rilp              | Rab interacting lysosomal protein                                               | -1.17 | 0.152 | -1.24 | 0.15  | -1.14 | 0.387 | -1.43 | 0.364 | -1.24 |
| 1450066_at   | Ubr1              | ubiquitin protein ligase E3 component n-recognin 1                              | -1.18 | 0.368 | -1.06 | 0.577 | -1.33 | 0.126 | -1.3  | 0.217 | -1.22 |
| 1431009_at   | B230219D22Rik     | RIKEN cDNA B230219D22 gene                                                      | -1.03 | 0.652 | -1.21 | 0.687 | -1.35 | 0.11  | -1.1  | 0.781 | -1.17 |
| 1419702_at   | Taf1a             | TATA box binding protein (Tbp)-associated factor, RNA polymerase I, A           | -1.21 | 0.183 | -1.26 | 0.167 | -1.09 | 0.532 | -1.48 | 0.012 | -1.26 |
| 1419006_s_at | Peli2             | pellino 2                                                                       | -1.46 | 0.474 | -1.03 | 0.933 | -1.14 | 0.299 | -1.74 | 0.2   | -1.34 |
| 1422026_at   | Pl16              | peptidase inhibitor 16                                                          | -1.09 | 0.755 | -1.39 | 0.412 | -1.1  | 0.776 | -1.78 | 0.591 | -1.34 |
| 1429027_at   | 0610007N19Rik     | RIKEN cDNA 0610007N19 gene                                                      | -1.07 | 0.692 | -1.12 | 0.759 | -1.4  | 0.042 | -1.34 | 0.211 | -1.23 |
| 1444004_at   | Thoc2             | THO complex 2                                                                   | -1.03 | 0.898 | -1.1  | 0.118 | -1.52 | 0.081 | -1.04 | 0.867 | -1.17 |
| 1436516_at   | Abhd13            | abhydrolase domain containing 13                                                | -1.07 | 0.818 | -1.28 | 0.013 | -1.22 | 0.108 | -1.31 | 0.094 | -1.22 |
| 1421052_a_at | Sms /// LOC671878 | spermine synthase /// similar to Spermine synthase (Spermidine aminopropyltran- | -1.26 | 0.231 | -1.15 | 0.505 | -1.15 | 0.152 | -1.28 | 0.004 | -1.21 |
| 1447112_s_at | Cryl1             | crystallin, lamda 1                                                             | -1.29 | 0.188 | -1.16 | 0.525 | -1.1  | 0.377 | -1.11 | 0.729 | -1.17 |
| 1454890_at   | Amot              | angiomin                                                                        | -1.02 | 0.803 | -1.17 | 0.099 | -1.42 | 0.078 | -1.28 | 0.53  | -1.22 |

|              |               |                                                                                         |       |       |       |       |       |       |       |       |       |
|--------------|---------------|-----------------------------------------------------------------------------------------|-------|-------|-------|-------|-------|-------|-------|-------|-------|
| 1419158_a_at | Harsl         | histidyl-tRNA synthetase-like                                                           | -1.14 | 0.313 | -1.34 | 0.01  | -1.09 | 0.55  | -1.19 | 0.383 | -1.19 |
| 1440835_at   | Zfp27         | zinc finger protein 27                                                                  | -1.03 | 0.813 | -1.34 | 0.3   | -1.21 | 0.251 | -1.37 | 0.024 | -1.24 |
| 1416810_at   | Mea1          | male enhanced antigen 1                                                                 | -1.08 | 0.102 | -1.15 | 0.264 | -1.34 | 0.062 | -1.28 | 0.13  | -1.21 |
| 1449655_a_at | ---           | CDNA clone IMAGE:5690974                                                                | -1.03 | 0.532 | -1.6  | 0.171 | -1.05 | 0.867 | -1.87 | 0.155 | -1.39 |
| 1444366_at   | Taok3         | TAO kinase 3                                                                            | -1.11 | 0.758 | -1.17 | 0.617 | -1.28 | 0.432 | -1.26 | 0.449 | -1.2  |
| 1457944_at   | Etv6          | Ets variant gene 6 (TEL oncogene)                                                       | -1.03 | 0.864 | -1.06 | 0.439 | -1.59 | 0.234 | -1.51 | 0.082 | -1.3  |
| 1421256_at   | Gzmc          | granzyme C                                                                              | -1.01 | 0.999 | -1.02 | 0.975 | -1.79 | 0.155 | -3    | 0.351 | -1.7  |
| 1415776_at   | Aldh3a2       | aldehyde dehydrogenase family 3, subfamily A2                                           | -1.01 | 0.848 | -1.41 | 0.386 | -1.19 | 0.204 | -1.51 | 0.178 | -1.28 |
| 1459856_at   | Mrpl13        | Mitochondrial ribosomal protein L13                                                     | -1.32 | 0.278 | -1.01 | 0.971 | -1.26 | 0.523 | -1.11 | 0.101 | -1.18 |
| 1417842_at   | Cam1          | calcium modulating ligand                                                               | -1.29 | 0.119 | -1.09 | 0.162 | -1.18 | 0.168 | -1.14 | 0.444 | -1.17 |
| 1456896_at   | 6720462K09Rik | RIKEN cDNA 6720462K09 gene                                                              | -1.02 | 0.657 | -1.02 | 0.933 | -1.73 | 0.019 | -1.04 | 0.722 | -1.2  |
| 1424456_at   | Pvrl2         | poliovirus receptor-related 2                                                           | -1.09 | 0.647 | -1.45 | 0.011 | -1.07 | 0.392 | -1.28 | 0.316 | -1.22 |
| 1439345_at   | Gpnmb         | glycoprotein (transmembrane) nmb                                                        | -1.26 | 0.53  | -1.32 | 0.519 | -1    | 0.983 | -1.07 | 0.804 | -1.17 |
| 1440840_at   | D630004K10Rik | RIKEN cDNA D630004K10 gene                                                              | -1.12 | 0.008 | -1.15 | 0.563 | -1.28 | 0.289 | -1    | 0.993 | -1.14 |
| 1442288_at   | Anxa6         | Annexin A6                                                                              | -1.04 | 0.861 | -1.11 | 0.674 | -1.46 | 0.068 | -1.33 | 0.588 | -1.24 |
| 1418966_a_at | Dcbld1        | discoidin, CUB and LCCL domain containing 1                                             | -1.13 | 0.61  | -1.13 | 0.368 | -1.3  | 0.149 | -1.28 | 0.071 | -1.21 |
| 1416471_at   | Cept1         | choline/ethanolaminephosphotransferase 1                                                | -1.35 | 0.064 | -1.15 | 0.176 | -1.07 | 0.463 | -1.59 | 0.078 | -1.29 |
| 1442166_at   | Cpne5         | copine V                                                                                | -1.33 | 0.097 | -1.2  | 0.508 | -1.04 | 0.819 | -1.14 | 0.228 | -1.18 |
| 1417736_at   | Smc6          | structural maintenance of chromosomes 6                                                 | -1.24 | 0.134 | -1.11 | 0.593 | -1.19 | 0.076 | -1.01 | 0.968 | -1.14 |
| 1442784_at   | Zfp608        | Zinc finger protein 608                                                                 | -1.03 | 0.732 | -1.19 | 0.775 | -1.37 | 0.397 | -2.78 | 0.024 | -1.59 |
| 1416370_at   | Zipro1        | zinc finger proliferation 1                                                             | -1.21 | 0.201 | -1.05 | 0.719 | -1.31 | 0.093 | -1.24 | 0.493 | -1.2  |
| 1428919_at   | Fgfr1op       | Fgfr1 oncogene partner                                                                  | -1.17 | 0.081 | -1.1  | 0.464 | -1.28 | 0.122 | -1.38 | 0.251 | -1.23 |
| 1427978_at   | 4732418C07Rik | RIKEN cDNA 4732418C07 gene                                                              | -1.12 | 0.501 | -1.14 | 0.509 | -1.29 | 0.274 | -1.17 | 0.533 | -1.18 |
| 1420590_at   | Has1          | hyaluronan synthase1                                                                    | -1.23 | 0.605 | -1.13 | 0.653 | -1.17 | 0.565 | -1.01 | 0.991 | -1.14 |
| 1428067_at   | Ras12         | RAS-like, family 12                                                                     | -1.22 | 0.449 | -1.07 | 0.598 | -1.27 | 0.214 | -1    | 0.994 | -1.14 |
| 1436222_at   | Gas5          | growth arrest specific 5                                                                | -1.32 | 0.416 | -1.24 | 0.45  | -1.02 | 0.929 | -1.2  | 0.467 | -1.19 |
| 1446550_at   | Gspt1         | G1 to S phase transition 1                                                              | -1.06 | 0.423 | -1.07 | 0.748 | -1.5  | 0.019 | -1.12 | 0.519 | -1.19 |
| 1456851_at   | Foxp1         | Forkhead box P1                                                                         | -1.02 | 0.974 | -1.28 | 0.354 | -1.27 | 0.376 | -2.66 | 0.1   | -1.56 |
| 1434175_s_at | 2210010N04Rik | RIKEN cDNA 2210010N04 gene                                                              | -1.28 | 0.294 | -1.22 | 0.669 | -1.06 | 0.772 | -1.7  | 0.314 | -1.31 |
| 1416874_a_at | Paf1          | Paf1, RNA polymerase II associated factor, homolog (S. cerevisiae)                      | -1.39 | 0.3   | -1.07 | 0.546 | -1.13 | 0.654 | -1.64 | 0.175 | -1.3  |
| 1433672_at   | 4732479N06Rik | RIKEN cDNA 4732479N06 gene                                                              | -1.15 | 0.066 | -1.33 | 0.027 | -1.09 | 0.301 | -1.2  | 0.271 | -1.19 |
| 1456763_at   | AA536749      | expressed sequence AA536749                                                             | -1.01 | 0.912 | -1.15 | 0.339 | -1.45 | 0.094 | -1.22 | 0.342 | -1.21 |
| 1420964_at   | Enc1          | ectodermal-neural cortex 1                                                              | -1.27 | 0.019 | -1.2  | 0.8   | -1.09 | 0.886 | -1.22 | 0.848 | -1.19 |
| 1426559_at   | Sbno1         | sno, strawberry notch homolog 1 (Drosophila)                                            | -1.16 | 0.319 | -1.2  | 0.01  | -1.17 | 0.04  | -1.15 | 0.149 | -1.17 |
| 1449303_at   | Sesn3         | sestrin 3                                                                               | -1.32 | 0.044 | -1.15 | 0.378 | -1.09 | 0.779 | -2.24 | 0.068 | -1.45 |
| 1417673_at   | Grb14         | growth factor receptor bound protein 14                                                 | -1.13 | 0.342 | -1.31 | 0.013 | -1.12 | 0.475 | -1.66 | 0.518 | -1.3  |
| 1457508_at   | C430003N24Rik | RIKEN cDNA C430003N24 gene                                                              | -1.03 | 0.908 | -1.08 | 0.678 | -1.54 | 0.071 | -1.36 | 0.367 | -1.25 |
| 1450482_a_at | Pitx2         | paired-like homeodomain transcription factor 2                                          | -1.14 | 0.717 | -1.15 | 0.699 | -1.25 | 0.477 | -1.04 | 0.942 | -1.15 |
| 1452765_at   | LOC674308     | similar to solute carrier family 39 (zinc transporter), member 9                        | -1.18 | 0.249 | -1.16 | 0.226 | -1.19 | 0.077 | -1.12 | 0.453 | -1.16 |
| 1421478_a_at | Zfp318        | zinc finger protein 318                                                                 | -1.07 | 0.599 | -1.36 | 0.043 | -1.14 | 0.052 | -2.25 | 0.131 | -1.46 |
| 1447990_at   | C76332        | expressed sequence C76332                                                               | -1.27 | 0.487 | -1.03 | 0.954 | -1.27 | 0.622 | -3.94 | 0.023 | -1.88 |
| 1452333_at   | Smarca2       | SWI/SNF related, matrix associated, actin dependent regulator of chromatin, subunit 2   | -1.02 | 0.952 | -1.26 | 0.436 | -1.3  | 0.092 | -1.8  | 0.273 | -1.34 |
| 1433752_s_at | D030016E14Rik | RIKEN cDNA D030016E14 gene                                                              | -1.14 | 0.315 | -1.35 | 0.007 | -1.07 | 0.649 | -1.27 | 0.094 | -1.21 |
| 1427475_a_at | LOC669660     | similar to PDZ and LIM domain protein 5 (Enigma homolog) (Enigma-like PDZ ankyrin-like) | -1.17 | 0.203 | -1.23 | 0.078 | -1.13 | 0.335 | -1.07 | 0.679 | -1.15 |
| 1436993_x_at | Pfn2          | profilin 2                                                                              | -1.28 | 0.137 | -1.22 | 0.507 | -1.05 | 0.754 | -1.52 | 0.175 | -1.27 |
| 1417390_at   | Xab1          | XPA binding protein 1                                                                   | -1.41 | 0.04  | -1.16 | 0.124 | -1.02 | 0.838 | -1.43 | 0.114 | -1.26 |
| 1428388_at   | Tnks2         | tankyrase, TRF1-interacting ankyrin-related ADP-ribose polymerase 2                     | -1.1  | 0.133 | -1.03 | 0.818 | -1.48 | 0.297 | -1.53 | 0.226 | -1.29 |
| 1446520_at   | Il1rapl2      | interleukin 1 receptor accessory protein-like 2                                         | -1.05 | 0.937 | -1.12 | 0.777 | -1.43 | 0.373 | -1.07 | 0.898 | -1.17 |
| 1453636_at   | Pcgf5         | polycomb group ring finger 5                                                            | -1.09 | 0.467 | -1.12 | 0.633 | -1.36 | 0.232 | -1.91 | 0.156 | -1.37 |
| 1451556_a_at | 2700078E11Rik | RIKEN cDNA 2700078E11 gene                                                              | -1.28 | 0.044 | -1.11 | 0.704 | -1.16 | 0.094 | -1.16 | 0.055 | -1.18 |
| 1438104_at   | ---           | ---                                                                                     | -1.01 | 0.898 | -1.06 | 0.678 | -1.63 | 0.275 | -1.16 | 0.03  | -1.21 |
| 1416281_at   | Wdr45l        | Wdr45 like                                                                              | -1.11 | 0.639 | -1.09 | 0.352 | -1.37 | 0.037 | -1.24 | 0.177 | -1.2  |
| 1444310_at   | Polr3a        | polymerase (RNA) III (DNA directed) polypeptide A                                       | -1.13 | 0.799 | -1.23 | 0.661 | -1.18 | 0.748 | -1.01 | 0.894 | -1.14 |

|                |                   |                                                                                   |       |       |       |       |       |       |       |       |       |
|----------------|-------------------|-----------------------------------------------------------------------------------|-------|-------|-------|-------|-------|-------|-------|-------|-------|
| 1434379_at     | Mxd4              | Max dimerization protein 4                                                        | -1.01 | 0.988 | -1.13 | 0.505 | -1.49 | 0.058 | -1.56 | 0.169 | -1.3  |
| 1417834_at     | Synj2bp           | synaptojanin 2 binding protein                                                    | -1.1  | 0.358 | -1.19 | 0.058 | -1.24 | 0.054 | -1.18 | 0.11  | -1.18 |
| 1436226_at     | Tceb1             | transcription elongation factor B (SIII), polypeptide 1                           | -1.06 | 0.388 | -1.07 | 0.33  | -1.48 | 0     | -1.11 | 0.602 | -1.18 |
| 1456460_at     | BC068281          | cDNA sequence BC068281                                                            | -1.39 | 0.431 | -1.17 | 0.492 | -1.02 | 0.949 | -1.31 | 0.412 | -1.22 |
| AFFX-MUR_b2_at | ---               | ---                                                                               | -1.13 | 0.334 | -1.09 | 0.255 | -1.35 | 0.111 | -1.08 | 0.706 | -1.16 |
| 1428180_at     | 2810422J05Rik     | RIKEN cDNA 2810422J05 gene                                                        | -1.15 | 0.452 | -1.15 | 0.311 | -1.23 | 0.181 | -1.36 | 0.051 | -1.22 |
| 1442911_at     | RioK2             | RIO kinase 2 (yeast)                                                              | -1.05 | 0.809 | -1.09 | 0.801 | -1.47 | 0.073 | -1.44 | 0.098 | -1.26 |
| 1425892_a_at   | Prnoc             | prepronociceptin                                                                  | -1.28 | 0.716 | -1.11 | 0.744 | -1.15 | 0.699 | -1.2  | 0.552 | -1.18 |
| 1424873_at     | Rnf2              | ring finger protein 2                                                             | -1.16 | 0.391 | -1.1  | 0.154 | -1.28 | 0.004 | -1.59 | 0.069 | -1.28 |
| 1434823_x_at   | Myeov2            | myeloma overexpressed 2                                                           | -1.16 | 0.209 | -1.1  | 0.026 | -1.28 | 0.176 | -1.49 | 0.117 | -1.26 |
| 1426861_at     | Aftph             | aftiphilin                                                                        | -1.23 | 0.3   | -1.05 | 0.64  | -1.27 | 0.072 | -1.16 | 0.553 | -1.18 |
| 1428500_at     | 2210419D22Rik     | RIKEN cDNA 2210419D22 gene                                                        | -1.14 | 0.358 | -1.04 | 0.659 | -1.41 | 0.112 | -1.1  | 0.729 | -1.17 |
| 1428248_at     | Nfx1              | nuclear transcription factor, X-box binding 1                                     | -1.13 | 0.639 | -1.15 | 0.442 | -1.26 | 0.178 | -1.34 | 0.149 | -1.22 |
| 1439901_at     | 2610208M17Rik     | RIKEN cDNA 2610208M17 gene                                                        | -1.12 | 0.681 | -1.05 | 0.833 | -1.42 | 0.008 | -1.34 | 0.127 | -1.23 |
| 1460420_a_at   | Egfr              | epidermal growth factor receptor                                                  | -1.28 | 0.225 | -1.16 | 0.685 | -1.1  | 0.663 | -1.1  | 0.64  | -1.16 |
| 1446938_at     | AA408213          | expressed sequence AA408213                                                       | -1.07 | 0.791 | -1.06 | 0.845 | -1.48 | 0.19  | -1.44 | 0.36  | -1.26 |
| 1423331_a_at   | Pvrl3             | poliovirus receptor-related 3                                                     | -1.11 | 0.508 | -1.13 | 0.427 | -1.32 | 0.18  | -1.4  | 0.005 | -1.24 |
| 1428825_at     | Nr6a1             | nuclear receptor subfamily 6, group A, member 1                                   | -1.29 | 0.167 | -1.18 | 0.61  | -1.08 | 0.572 | -1.69 | 0.323 | -1.31 |
| 1428853_at     | Ptch1             | patched homolog 1                                                                 | -1.01 | 0.933 | -1.19 | 0.143 | -1.39 | 0.226 | -1.29 | 0.056 | -1.22 |
| 1449025_at     | Ifit3             | interferon-induced protein with tetratricopeptide repeats 3                       | -1.18 | 0.43  | -1.13 | 0.681 | -1.22 | 0.444 | -1.55 | 0.3   | -1.27 |
| 1419660_at     | 1600012F09Rik     | RIKEN cDNA 1600012F09 gene                                                        | -1.17 | 0.038 | -1.17 | 0.205 | -1.19 | 0.122 | -1.07 | 0.748 | -1.15 |
| 1419007_at     | Zp3               | zona pellucida glycoprotein 3                                                     | -1.05 | 0.95  | -1.25 | 0.647 | -1.25 | 0.308 | -2.79 | 0.496 | -1.59 |
| 1450780_s_at   | Hmga2             | high mobility group AT-hook 2                                                     | -1.02 | 0.939 | -1.46 | 0.053 | -1.12 | 0.595 | -1.6  | 0.219 | -1.3  |
| 1425577_at     | 9830124H08Rik     | RIKEN cDNA 9830124H08 gene                                                        | -1.07 | 0.437 | -1.16 | 0.112 | -1.33 | 0.067 | -1.55 | 0.119 | -1.28 |
| 1443001_at     | C78344            | expressed sequence C78344                                                         | -1.07 | 0.883 | -1.16 | 0.821 | -1.32 | 0.585 | -1.03 | 0.961 | -1.15 |
| 1432171_at     | 4933409F18Rik     | RIKEN cDNA 4933409F18 gene                                                        | -1.15 | 0.603 | -1.09 | 0.859 | -1.31 | 0.48  | -1.27 | 0.577 | -1.2  |
| 1440846_at     | A930041I02Rik     | RIKEN cDNA A930041I02 gene                                                        | -1.38 | 0.406 | -1.12 | 0.481 | -1.07 | 0.797 | -1.42 | 0.027 | -1.25 |
| 1454422_at     | 4930456J16Rik     | RIKEN cDNA 4930456J16 gene                                                        | -1.02 | 0.842 | -1.22 | 0.573 | -1.34 | 0.011 | -1.01 | 0.975 | -1.14 |
| 1415872_at     | Hnrph1            | heterogeneous nuclear ribonucleoprotein H1                                        | -1.07 | 0.325 | -1.17 | 0.142 | -1.3  | 0.118 | -1.15 | 0.571 | -1.17 |
| 1427020_at     | Scara3            | scavenger receptor class A, member 3                                              | -1.03 | 0.838 | -1.43 | 0.191 | -1.14 | 0.64  | -1.42 | 0.45  | -1.25 |
| 1426803_at     | Rbm26             | RNA binding motif protein 26                                                      | -1.29 | 0.315 | -1.22 | 0.102 | -1.04 | 0.754 | -1.17 | 0.588 | -1.18 |
| 1422532_at     | Xpc               |                                                                                   | -1.21 | 0.095 | -1.22 | 0.069 | -1.11 | 0.508 | -1.38 | 0.151 | -1.23 |
| 1438766_at     | Pnrc2             | proline-rich nuclear receptor coactivator 2                                       | -1.03 | 0.858 | -1.35 | 0.139 | -1.19 | 0.494 | -1.46 | 0.079 | -1.26 |
| 1442002_at     | 7030402D04Rik     | RIKEN cDNA 7030402D04 gene                                                        | -1.08 | 0.643 | -1.13 | 0.356 | -1.35 | 0.153 | -1.1  | 0.405 | -1.16 |
| 1433810_x_at   | Ddx5              | DEAD (Asp-Glu-Ala-Asp) box polypeptide 5                                          | -1.21 | 0.215 | -1.13 | 0.397 | -1.19 | 0.507 | -1.18 | 0.709 | -1.18 |
| 1424047_at     | Dera              | 2-deoxyribose-5-phosphate aldolase homolog (C. elegans)                           | -1.28 | 0.106 | -1.22 | 0.103 | -1.05 | 0.717 | -1.17 | 0.323 | -1.18 |
| 1460544_at     | Mak10             | MAK10 homolog, amino-acid N-acetyltransferase subunit, (S. cerevisiae)            | -1.23 | 0.102 | -1.29 | 0.277 | -1.04 | 0.873 | -1.65 | 0.003 | -1.3  |
| 1419105_at     | Nr1h4             | nuclear receptor subfamily 1, group H, member 4                                   | -1.32 | 0.382 | -1.18 | 0.048 | -1.06 | 0.89  | -1.93 | 0.06  | -1.37 |
| 1444231_at     | Zdhhc6            | Zinc finger, DHHC domain containing 6                                             | -1.09 | 0.3   | -1    | 0.994 | -1.56 | 0.053 | -1.15 | 0.51  | -1.2  |
| 1416067_at     | lfrd1             | interferon-related developmental regulator 1                                      | -1.05 | 0.878 | -1.29 | 0.156 | -1.21 | 0.116 | -1.03 | 0.696 | -1.14 |
| 1453123_at     | Sf3b2             | splicing factor 3b, subunit 2                                                     | -1.21 | 0.072 | -1.28 | 0.207 | -1.06 | 0.67  | -1.16 | 0.234 | -1.18 |
| 1436248_at     | ---               | Adult male spinal cord cDNA, RIKEN full-length enriched library, clone:A330033L   | -1.11 | 0.572 | -1.2  | 0.016 | -1.23 | 0.22  | -1.04 | 0.792 | -1.14 |
| 1441144_at     | Arr3              | arrestin 3, retinal                                                               | -1.44 | 0.316 | -1.04 | 0.884 | -1.11 | 0.76  | -1.53 | 0.156 | -1.28 |
| 1440893_at     | ---               | ---                                                                               | -1.04 | 0.88  | -1.09 | 0.735 | -1.48 | 0.155 | -1.11 | 0.673 | -1.18 |
| 1427876_at     | 2610312B22Rik     | RIKEN cDNA 2610312B22 gene                                                        | -1.11 | 0.483 | -1.2  | 0.154 | -1.22 | 0.054 | -1.16 | 0.044 | -1.17 |
| 1438843_x_at   | Mtch2             | mitochondrial carrier homolog 2 (C. elegans)                                      | -1.28 | 0.117 | -1.19 | 0.041 | -1.07 | 0.758 | -1.16 | 0.318 | -1.18 |
| 1426429_at     | Thap7             | THAP domain containing 7                                                          | -1.26 | 0.729 | -1.12 | 0.629 | -1.16 | 0.712 | -1.24 | 0.091 | -1.19 |
| 1429556_at     | 2610024B07Rik     | RIKEN cDNA 2610024B07 gene                                                        | -1.22 | 0.424 | -1    | 0.986 | -1.36 | 0.411 | -1.17 | 0.546 | -1.19 |
| 1422806_x_at   | Ing3              | inhibitor of growth family, member 3                                              | -1.28 | 0.49  | -1.15 | 0.307 | -1.1  | 0.503 | -1.79 | 0.13  | -1.33 |
| 1417321_at     | D4Wsu132e         | DNA segment, Chr 4, Wayne State University 132, expressed                         | -1.21 | 0.385 | -1.1  | 0.324 | -1.22 | 0.32  | -1.63 | 0.204 | -1.29 |
| 1428321_at     | Emi1 /// LOC63410 | echinoderm microtubule associated protein like 1 /// similar to echinoderm microt | -1.02 | 0.955 | -1.45 | 0.618 | -1.13 | 0.602 | -1.7  | 0.144 | -1.32 |
| 1416154_at     | Srp54 /// LOC6651 | signal recognition particle 54 /// similar to signal recognition particle 54      | -1.32 | 0.732 | -1.18 | 0.698 | -1.05 | 0.806 | -1.1  | 0.342 | -1.16 |
| 1429733_at     | Ccdc94            | coiled-coil domain containing 94                                                  | -1.2  | 0.269 | -1.11 | 0.758 | -1.21 | 0.08  | -1.32 | 0.156 | -1.21 |

|              |               |                                                                                 |       |       |       |       |       |       |       |       |       |
|--------------|---------------|---------------------------------------------------------------------------------|-------|-------|-------|-------|-------|-------|-------|-------|-------|
| 1438695_at   | C230091D08Rik | RIKEN cDNA C230091D08 gene                                                      | -1.06 | 0.725 | -1.1  | 0.132 | -1.42 | 0.068 | -1.13 | 0.327 | -1.18 |
| 1418117_at   | Ndufs4        | NADH dehydrogenase (ubiquinone) Fe-S protein 4                                  | -1.09 | 0.564 | -1.54 | 0.005 | -1.01 | 0.942 | -1.13 | 0.49  | -1.19 |
| 1417451_a_at | Ppia          | peptidylprolyl isomerase A                                                      | -1.17 | 0.151 | -1.13 | 0.342 | -1.22 | 0.006 | -1.23 | 0.016 | -1.19 |
| 1434550_at   | 3830406C13Rik | RIKEN cDNA 3830406C13 gene                                                      | -1.12 | 0.059 | -1.1  | 0.528 | -1.32 | 0.108 | -1.46 | 0.157 | -1.25 |
| 1429000_at   | Phf3          | PHD finger protein 3                                                            | -1.1  | 0.454 | -1.18 | 0.313 | -1.25 | 0.157 | -1.01 | 0.968 | -1.13 |
| 1420626_at   | 2410016F19Rik | RIKEN cDNA 2410016F19 gene                                                      | -1.1  | 0.276 | -1.1  | 0.386 | -1.35 | 0.017 | -1.07 | 0.653 | -1.16 |
| 1442231_at   | Al616248      | expressed sequence Al616248                                                     | -1.38 | 0.562 | -1.1  | 0.837 | -1.08 | 0.669 | -1.6  | 0.424 | -1.29 |
| 1455958_s_at | Pptc7         | PTC7 protein phosphatase homolog (S. cerevisiae)                                | -1.17 | 0.345 | -1.2  | 0.449 | -1.15 | 0.304 | -1.62 | 0.124 | -1.28 |
| 1428556_at   | Pigy          | phosphatidylinositol glycan anchor biosynthesis, class Y                        | -1.14 | 0.293 | -1.23 | 0.034 | -1.16 | 0.061 | -1.03 | 0.75  | -1.14 |
| 1437538_at   | 2610002F03Rik | RIKEN cDNA 2610002F03 gene                                                      | -1.12 | 0.526 | -1.45 | 0.083 | -1.03 | 0.814 | -1.05 | 0.914 | -1.16 |
| 1449800_x_at | Phf7          | PHD finger protein 7                                                            | -1.13 | 0.403 | -1.1  | 0.582 | -1.32 | 0.134 | -1.48 | 0.256 | -1.26 |
| 1435781_at   | Cand1         | cullin associated and neddylation disassociated 1                               | -1.03 | 0.873 | -1.15 | 0.31  | -1.38 | 0.117 | -1.19 | 0.05  | -1.19 |
| 1439071_at   | 5430416N02Rik | RIKEN cDNA 5430416N02 gene                                                      | -1.09 | 0.743 | -1.12 | 0.661 | -1.33 | 0.074 | -1.34 | 0.117 | -1.22 |
| 1417250_at   | Rnf12         | ring finger protein 12                                                          | -1.05 | 0.716 | -1    | 0.976 | -1.65 | 0.05  | -1.06 | 0.787 | -1.19 |
| 1426489_s_at | Bfar          | bifunctional apoptosis regulator                                                | -1.25 | 0.077 | -1.13 | 0.264 | -1.15 | 0.148 | -1.48 | 0.112 | -1.25 |
| 1424489_a_at | Trit1         | tRNA isopentenyltransferase 1                                                   | -1.26 | 0.284 | -1.19 | 0.188 | -1.09 | 0.627 | -1.86 | 0.065 | -1.35 |
| 1423451_at   | Pgrmc1        | progesterone receptor membrane component 1                                      | -1.19 | 0.337 | -1.22 | 0.223 | -1.11 | 0.315 | -1.18 | 0.385 | -1.18 |
| 1443212_at   | Large         | Like-glycosyltransferase                                                        | -1.07 | 0.579 | -1.06 | 0.875 | -1.46 | 0.249 | -1.11 | 0.825 | -1.17 |
| 1428022_at   | Lcn13         | lipocalin 13                                                                    | -1.11 | 0.735 | -1.26 | 0.599 | -1.15 | 0.456 | -1.37 | 0.17  | -1.22 |
| 1428785_at   | Amotl1        | angiomin-like 1                                                                 | -1.09 | 0.29  | -1.23 | 0.34  | -1.2  | 0.391 | -1.12 | 0.464 | -1.16 |
| 1452047_at   | Cacybp        | calcyclin binding protein                                                       | -1.12 | 0.285 | -1.18 | 0.134 | -1.22 | 0.026 | -1.16 | 0.645 | -1.17 |
| 1434851_s_at | Crb3          | crumbs homolog 3 (Drosophila)                                                   | -1.03 | 0.794 | -1.18 | 0.103 | -1.34 | 0.088 | -1.46 | 0.134 | -1.25 |
| 1438041_at   | ---           | ---                                                                             | -1.01 | 0.973 | -1.14 | 0.598 | -1.45 | 0.115 | -1.93 | 0.133 | -1.38 |
| 1445843_at   | Chd2          | chromodomain helicase DNA binding protein 2                                     | -1.08 | 0.695 | -1.06 | 0.228 | -1.44 | 0.01  | -1.6  | 0.185 | -1.3  |
| 1434555_at   | Anp32a        | acidic (leucine-rich) nuclear phosphoprotein 32 family, member A                | -1.06 | 0.46  | -1.17 | 0.298 | -1.31 | 0.031 | -1.37 | 0.035 | -1.23 |
| 1458870_x_at | Phr1          | pam, highwire, rpm 1                                                            | -1.29 | 0.496 | -1.09 | 0.809 | -1.15 | 0.476 | -1.02 | 0.96  | -1.14 |
| 1428725_at   | Pias2         | protein inhibitor of activated STAT 2                                           | -1.12 | 0.553 | -1.19 | 0.182 | -1.21 | 0.09  | -1.26 | 0.151 | -1.2  |
| 1449291_a_at | Dcbld1        | discoordin, CUB and LCCL domain containing 1                                    | -1.09 | 0.272 | -1.07 | 0.778 | -1.42 | 0.105 | -1.78 | 0.107 | -1.34 |
| 1433482_a_at | Fubp1         | far upstream element (FUSE) binding protein 1                                   | -1.09 | 0.684 | -1.5  | 0.13  | -1.03 | 0.871 | -1.67 | 0.2   | -1.32 |
| 1434180_at   | Plekhc1       | pleckstrin homology domain containing, family C (with FERM domain) member 1     | -1.02 | 0.608 | -1.15 | 0.351 | -1.41 | 0.062 | -1.48 | 0.216 | -1.26 |
| 1416278_a_at | Atp5o         | ATP synthase, H+ transporting, mitochondrial F1 complex, O subunit              | -1.15 | 0.191 | -1.23 | 0.081 | -1.15 | 0.389 | -1.06 | 0.525 | -1.14 |
| 1437041_at   | 5730406M06Rik | RIKEN cDNA 5730406M06 gene                                                      | -1.19 | 0.375 | -1.14 | 0.518 | -1.18 | 0.347 | -1.37 | 0.355 | -1.22 |
| 1418578_at   | Dgka          | diacylglycerol kinase, alpha                                                    | -1.1  | 0.14  | -1.36 | 0.047 | -1.09 | 0.592 | -3.33 | 0.023 | -1.72 |
| 1459537_at   | 4631427C17Rik | RIKEN cDNA 4631427C17 gene                                                      | -1.54 | 0.004 | -1.03 | 0.921 | -1.06 | 0.718 | -1.44 | 0.112 | -1.27 |
| 1435221_at   | ---           | Adult male corpora quadrigemina cDNA, RIKEN full-length enriched library, clone | -1.15 | 0.428 | -1.27 | 0.112 | -1.11 | 0.6   | -1.98 | 0.141 | -1.38 |
| 1445056_at   | 9230102K24Rik | RIKEN cDNA 9230102K24 gene                                                      | -1.36 | 0.595 | -1.06 | 0.889 | -1.14 | 0.78  | -1.18 | 0.475 | -1.18 |
| 1436505_at   | Ppig          | peptidyl-prolyl isomerase G (cyclophilin G)                                     | -1    | 0.997 | -1.22 | 0.135 | -1.35 | 0.165 | -1.13 | 0.615 | -1.17 |
| 1426365_at   | 2810403A07Rik | RIKEN cDNA 2810403A07 gene                                                      | -1.22 | 0.416 | -1.27 | 0.057 | -1.04 | 0.833 | -1.24 | 0.214 | -1.19 |
| 1416058_s_at | Atp5c1        | ATP synthase, H+ transporting, mitochondrial F1 complex, gamma polypeptide 1    | -1.25 | 0.008 | -1.3  | 0.011 | -1.01 | 0.849 | -1.05 | 0.675 | -1.15 |
| 1454888_at   | Pfdn4         | prefoldin 4                                                                     | -1.02 | 0.689 | -1.14 | 0.019 | -1.42 | 0.034 | -1.23 | 0.219 | -1.2  |
| 1438478_a_at | Ppp3ca        | protein phosphatase 3, catalytic subunit, alpha isoform                         | -1.15 | 0.019 | -1.21 | 0.277 | -1.15 | 0.447 | -1.48 | 0.176 | -1.25 |
| 1420456_at   | Gcm2          | glial cells missing homolog 2 (Drosophila)                                      | -1.34 | 0.341 | -1.13 | 0.712 | -1.08 | 0.723 | -1.16 | 0.79  | -1.18 |
| 1420628_at   | Pura          | purine rich element binding protein A                                           | -1.05 | 0.166 | -1.2  | 0.026 | -1.3  | 0.054 | -1.4  | 0.169 | -1.24 |
| 1452611_at   | Zfp294        | zinc finger protein 294                                                         | -1.09 | 0.46  | -1.33 | 0.12  | -1.12 | 0.561 | -1.09 | 0.655 | -1.16 |
| 1423781_at   | Appbp1        | amyloid beta precursor protein binding protein 1                                | -1.17 | 0.446 | -1.03 | 0.663 | -1.36 | 0.039 | -1.43 | 0.016 | -1.25 |
| 1442666_at   | D9ErtD12e     | DNA segment, Chr 9, ERATO Doi 12, expressed                                     | -1.08 | 0.632 | -1.24 | 0.758 | -1.21 | 0.597 | -1.43 | 0.52  | -1.24 |
| 1423442_a_at | Fbxw2         | F-box and WD-40 domain protein 2                                                | -1.2  | 0.497 | -1.22 | 0.106 | -1.1  | 0.61  | -1.04 | 0.881 | -1.14 |
| 1415894_at   | Enpp2         | ectonucleotide pyrophosphatase/phosphodiesterase 2                              | -1.25 | 0.011 | -1.02 | 0.835 | -1.27 | 0.168 | -1.14 | 0.335 | -1.17 |
| 1458900_at   | Slc24a3       | Solute carrier family 24 (sodium/potassium/calcium exchanger), member 3         | -1.04 | 0.907 | -1.13 | 0.764 | -1.41 | 0.044 | -1.19 | 0.588 | -1.19 |
| 1429202_at   | 2610019N06Rik | RIKEN cDNA 2610019N06 gene                                                      | -1.12 | 0.135 | -1.37 | 0.374 | -1.07 | 0.722 | -1.36 | 0.095 | -1.23 |
| 1440348_at   | Zfyve9        | zinc finger, FYVE domain containing 9                                           | -1.16 | 0.439 | -1.13 | 0.284 | -1.23 | 0.183 | -1.27 | 0.263 | -1.2  |
| 1434306_at   | Rab3ip        | RAB3A interacting protein                                                       | -1.07 | 0.304 | -1.13 | 0.449 | -1.35 | 0.007 | -1.65 | 0.023 | -1.3  |
| 1457635_s_at | Nr3c1         | nuclear receptor subfamily 3, group C, member 1                                 | -1.16 | 0.314 | -1.01 | 0.958 | -1.41 | 0.022 | -1.28 | 0.301 | -1.22 |

|                    |                   |                                                                                         |       |       |       |       |       |       |       |       |       |
|--------------------|-------------------|-----------------------------------------------------------------------------------------|-------|-------|-------|-------|-------|-------|-------|-------|-------|
| 1424016_at         | 2310007F21Rik     | RIKEN cDNA 2310007F21 gene                                                              | -1.11 | 0.21  | -1.29 | 0.183 | -1.13 | 0.378 | -1.16 | 0.586 | -1.17 |
| 1439524_at         | Dnajb4            | DnaJ (Hsp40) homolog, subfamily B, member 4                                             | -1.09 | 0.807 | -1.15 | 0.667 | -1.3  | 0.445 | -1.24 | 0.253 | -1.19 |
| 1418407_at         | Pde8a             | phosphodiesterase 8A                                                                    | -1.07 | 0.717 | -1.5  | 0.315 | -1.04 | 0.896 | -1.36 | 0.478 | -1.24 |
| 1437288_at         | Impad1            | inositol monophosphatase domain containing 1                                            | -1.03 | 0.611 | -1.07 | 0.577 | -1.53 | 0.058 | -1.08 | 0.577 | -1.18 |
| 1453886_a_at       | Slc25a26          | solute carrier family 25 (mitochondrial carrier, phosphate carrier), member 26          | -1.23 | 0.009 | -1.22 | 0.357 | -1.08 | 0.76  | -1.3  | 0.358 | -1.21 |
| 1422525_at         | Atp5k             | ATP synthase, H+ transporting, mitochondrial F1F0 complex, subunit e                    | -1.18 | 0.007 | -1.31 | 0.024 | -1.05 | 0.593 | -1.05 | 0.599 | -1.15 |
| 1452153_at         | Fbxo18            | F-box protein 18                                                                        | -1.12 | 0.291 | -1.2  | 0.083 | -1.19 | 0.129 | -1.22 | 0.383 | -1.18 |
| 1442519_at         | Ga17              | Dendritic cell protein GA17                                                             | -1.07 | 0.687 | -1.35 | 0.079 | -1.12 | 0.427 | -1.05 | 0.776 | -1.15 |
| 1454852_at         | Sp1               | trans-acting transcription factor 1                                                     | -1.13 | 0.173 | -1.06 | 0.618 | -1.36 | 0.024 | -1.13 | 0.54  | -1.17 |
| 1460052_at         | Acsm1             | Acyl-CoA synthetase medium-chain family member 1                                        | -1.02 | 0.896 | -1.22 | 0.297 | -1.31 | 0.632 | -1.58 | 0.345 | -1.28 |
| 1423298_at         | Add3              | adducin 3 (gamma)                                                                       | -1.23 | 0.134 | -1.1  | 0.688 | -1.19 | 0.327 | -1.78 | 0.169 | -1.33 |
| 1431996_at         | ---               | ---                                                                                     | -1.13 | 0.413 | -1.14 | 0.548 | -1.25 | 0.517 | -1.03 | 0.932 | -1.14 |
| 1453419_at         | 2900078C09Rik     | RIKEN cDNA 2900078C09 gene                                                              | -1.15 | 0.64  | -1.44 | 0.129 | -1    | 0.972 | -1.55 | 0.201 | -1.28 |
| 1432519_at         | 1810059H22Rik     | RIKEN cDNA 1810059H22 gene                                                              | -1.34 | 0.207 | -1.15 | 0.746 | -1.05 | 0.919 | -1.52 | 0.118 | -1.27 |
| 1417280_at         | Slc17a1           | solute carrier family 17 (sodium phosphate), member 1                                   | -1.05 | 0.261 | -1.2  | 0.192 | -1.28 | 0.674 | -1.28 | 0.327 | -1.2  |
| 1441190_at         | Arpc5l            | actin related protein 2/3 complex, subunit 5-like                                       | -1.01 | 0.981 | -1.53 | 0.131 | -1.09 | 0.776 | -1.11 | 0.784 | -1.19 |
| 1441944_s_at       | Gpr135            | G protein-coupled receptor 135                                                          | -1.31 | 0.448 | -1.15 | 0.789 | -1.08 | 0.896 | -1.36 | 0.332 | -1.22 |
| 1451287_s_at       | 2810003C17Rik     | RIKEN cDNA 2810003C17 gene                                                              | -1.21 | 0.239 | -1.17 | 0.755 | -1.13 | 0.562 | -1.54 | 0.501 | -1.26 |
| 1456594_at         | ---               | ---                                                                                     | -1.29 | 0.216 | -1.13 | 0.466 | -1.11 | 0.788 | -1.69 | 0.425 | -1.3  |
| 1428681_at         | Gm608             | gene model 608, (NCBI)                                                                  | -1.08 | 0.064 | -1.13 | 0.186 | -1.33 | 0.012 | -1.19 | 0.117 | -1.18 |
| 1460575_at         | Eif2a             | eukaryotic translation initiation factor 2a                                             | -1.18 | 0.486 | -1.16 | 0.286 | -1.16 | 0     | -1.14 | 0.297 | -1.16 |
| 1439979_at         | Zfp398            | zinc finger protein 398                                                                 | -1.35 | 0.185 | -1.18 | 0.587 | -1.02 | 0.891 | -1.42 | 0.351 | -1.24 |
| 1416624_a_at       | Uba52 /// LOC6665 | ubiquitin A-52 residue ribosomal protein fusion product 1 /// similar to ubiquitin A-52 | -1.06 | 0.271 | -1.19 | 0.395 | -1.28 | 0.007 | -1.23 | 0.058 | -1.19 |
| 1416482_at         | Ttc3              | tetratricopeptide repeat domain 3                                                       | -1.37 | 0.327 | -1.19 | 0.367 | -1.01 | 0.981 | -1.92 | 0.067 | -1.37 |
| 1426760_at         | Ipo8              | importin 8                                                                              | -1.02 | 0.757 | -1.31 | 0.055 | -1.21 | 0.095 | -1.06 | 0.798 | -1.15 |
| 1429165_at         | 3110001I22Rik     | RIKEN cDNA 3110001I22 gene                                                              | -1.06 | 0.737 | -1.37 | 0.092 | -1.12 | 0.309 | -1.34 | 0.183 | -1.22 |
| 1424493_s_at       | Ugt3a1            | UDP glycosyltransferases 3 family, polypeptide A1                                       | -1.03 | 0.827 | -1.22 | 0.152 | -1.29 | 0.503 | -1.02 | 0.943 | -1.14 |
| 1458242_at         | Gphn              | Gephyrin                                                                                | -1.43 | 0.521 | -1.04 | 0.943 | -1.1  | 0.786 | -1.31 | 0.759 | -1.22 |
| 1450897_at         | Arhgap5           | Rho GTPase activating protein 5                                                         | -1.18 | 0.503 | -1.14 | 0.39  | -1.18 | 0.065 | -1.37 | 0.314 | -1.22 |
| 1430546_at         | Cryz1l            | crystallin, zeta (quinone reductase)-like 1                                             | -1.3  | 0.297 | -1.02 | 0.934 | -1.22 | 0.34  | -1.21 | 0.588 | -1.19 |
| 1434178_at         | MLI3              | myeloid/lymphoid or mixed-lineage leukemia 3                                            | -1.08 | 0.509 | -1.1  | 0.498 | -1.36 | 0.114 | -1.06 | 0.576 | -1.15 |
| 1435088_at         | Nsd1              | nuclear receptor-binding SET-domain protein 1                                           | -1.06 | 0.588 | -1.1  | 0.304 | -1.39 | 0.069 | -1.69 | 0.065 | -1.31 |
| 1456154_at         | Zfp444            | Zinc finger protein 444                                                                 | -1.27 | 0.773 | -1.07 | 0.924 | -1.18 | 0.526 | -1.05 | 0.862 | -1.14 |
| 1426709_a_at       | Usp33             | ubiquitin specific peptidase 33                                                         | -1.23 | 0.458 | -1.07 | 0.473 | -1.21 | 0.185 | -1.19 | 0.281 | -1.18 |
| 1455646_at         | 2010004M13Rik     | RIKEN cDNA 2010004M13 gene                                                              | -1.07 | 0.485 | -1.34 | 0.525 | -1.12 | 0.501 | -1.78 | 0.066 | -1.33 |
| 1438986_x_at       | Rps17             | ribosomal protein S17                                                                   | -1.11 | 0.027 | -1.06 | 0.567 | -1.38 | 0     | -1.36 | 0.008 | -1.23 |
| 1437271_at         | Cicf1             | cardiotrophin-like cytokine factor 1                                                    | -1.06 | 0.572 | -1.16 | 0.451 | -1.31 | 0.242 | -2.04 | 0.078 | -1.39 |
| AFFX-r2-P1-cre-3_a | ---               | ---                                                                                     | -1.01 | 0.9   | -1.17 | 0.553 | -1.38 | 0.043 | -1.23 | 0.082 | -1.2  |
| 1428819_at         | Mapre1            | microtubule-associated protein, RP/EB family, member 1                                  | -1.14 | 0.358 | -1.08 | 0.769 | -1.3  | 0.289 | -1.11 | 0.815 | -1.16 |
| 1430703_at         | ---               | ---                                                                                     | -1.05 | 0.869 | -1.52 | 0.378 | -1.05 | 0.806 | -1.11 | 0.877 | -1.18 |
| 1424324_at         | Esco1             | establishment of cohesion 1 homolog 1 (S. cerevisiae)                                   | -1.15 | 0.065 | -1.06 | 0.438 | -1.33 | 0.026 | -1.5  | 0.04  | -1.26 |
| 1420967_at         | Slc25a15          | solute carrier family 25 (mitochondrial carrier ornithine transporter), member 15       | -1.19 | 0.027 | -1.09 | 0.289 | -1.24 | 0.203 | -1.14 | 0.349 | -1.16 |
| 1424912_at         | Slc25a17          | solute carrier family 25 (mitochondrial carrier, peroxisomal membrane protein), m       | -1.24 | 0.003 | -1.27 | 0.047 | -1.03 | 0.857 | -1.03 | 0.576 | -1.14 |
| 1428845_at         | Bclaf1            | BCL2-associated transcription factor 1                                                  | -1.19 | 0.318 | -1.14 | 0.246 | -1.17 | 0.353 | -1.18 | 0.233 | -1.17 |
| 1424526_a_at       | Tgds              | TDP-glucose 4,6-dehydratase                                                             | -1.07 | 0.149 | -1.05 | 0.654 | -1.49 | 0.026 | -1.69 | 0.106 | -1.32 |
| 1417720_at         | Polr2j            | polymerase (RNA) II (DNA directed) polypeptide J                                        | -1.15 | 0.39  | -1.14 | 0.009 | -1.21 | 0.106 | -1.01 | 0.952 | -1.13 |
| 1452261_at         | Shprh             | SNF2 histone linker PHD RING helicase                                                   | -1.1  | 0.417 | -1.23 | 0.229 | -1.18 | 0.034 | -1.29 | 0.108 | -1.2  |
| 1433649_at         | Aof1              | amine oxidase, flavin containing 1                                                      | -1.18 | 0.328 | -1.07 | 0.601 | -1.27 | 0.145 | -1.77 | 0.177 | -1.32 |
| 1425102_a_at       | Ace2              | angiotensin I converting enzyme (peptidyl-dipeptidase A) 2                              | -1.08 | 0.692 | -1.22 | 0.746 | -1.22 | 0.469 | -2.01 | 0.224 | -1.38 |
| 1424635_at         | Eef1a1            | eukaryotic translation elongation factor 1 alpha 1                                      | -1.13 | 0.034 | -1.18 | 0.447 | -1.2  | 0.01  | -1.23 | 0.052 | -1.19 |
| 1426477_at         | Rasa1             | RAS p21 protein activator 1                                                             | -1.04 | 0.05  | -1.02 | 0.703 | -1.58 | 0     | -1.47 | 0.132 | -1.28 |
| 1431689_at         | 5830400J07Rik     | RIKEN cDNA 5830400J07 gene                                                              | -1.28 | 0.169 | -1.06 | 0.864 | -1.18 | 0.604 | -1.2  | 0.167 | -1.18 |
| 1451649_a_at       | Wdr75             | WD repeat domain 75                                                                     | -1.18 | 0.411 | -1.05 | 0.296 | -1.31 | 0.05  | -1.4  | 0.131 | -1.23 |

|              |                    |                                                                                               |       |       |       |       |       |       |       |       |       |
|--------------|--------------------|-----------------------------------------------------------------------------------------------|-------|-------|-------|-------|-------|-------|-------|-------|-------|
| 1427254_at   | Zfp445             | zinc finger protein 445                                                                       | -1.07 | 0.718 | -1.06 | 0.795 | -1.45 | 0.13  | -1.39 | 0.322 | -1.24 |
| 1441062_at   | Ddx11              | DEAD/H (Asp-Glu-Ala-Asp/His) box polypeptide 11 (CHL1-like helicase homolog,                  | -1.1  | 0.747 | -1.08 | 0.891 | -1.37 | 0.461 | -1.12 | 0.72  | -1.17 |
| 1452101_at   | Blmh               | bleomycin hydrolase                                                                           | -1.35 | 0.113 | -1.14 | 0.297 | -1.05 | 0.749 | -1.03 | 0.919 | -1.14 |
| 1423112_at   | Ube2d3             | ubiquitin-conjugating enzyme E2D 3 (UBC4/5 homolog, yeast)                                    | -1.23 | 0.524 | -1.27 | 0.079 | -1.03 | 0.909 | -1.09 | 0.698 | -1.15 |
| 1455491_at   | Hnrph3 /// LOC669  | heterogeneous nuclear ribonucleoprotein H3 /// similar to heterogeneous nuclear               | -1.25 | 0.295 | -1.18 | 0.363 | -1.08 | 0.531 | -1.38 | 0.189 | -1.22 |
| 1457743_at   | D13Bwg1146e        | DNA segment, Chr 13, Brigham & Women's Genetics 1146 expressed                                | -1.07 | 0.928 | -1.34 | 0.718 | -1.13 | 0.674 | -1.24 | 0.534 | -1.19 |
| 1417981_at   | Insig2             | insulin induced gene 2                                                                        | -1.04 | 0.562 | -1.22 | 0.367 | -1.27 | 0.07  | -1.31 | 0.119 | -1.21 |
| 1424603_at   | Sumf1              | sulfatase modifying factor 1                                                                  | -1.25 | 0.488 | -1.01 | 0.971 | -1.29 | 0.464 | -1.72 | 0.319 | -1.32 |
| 1429882_at   | 2610005L07Rik      | RIKEN cDNA 2610005L07 gene                                                                    | -1.1  | 0.679 | -1.16 | 0.429 | -1.25 | 0.268 | -1.74 | 0.159 | -1.31 |
| 1428998_at   | Phf3               | PHD finger protein 3                                                                          | -1.1  | 0.135 | -1.17 | 0.145 | -1.25 | 0.11  | -1.04 | 0.77  | -1.14 |
| 1457751_at   | 4832420A03Rik      | RIKEN cDNA 4832420A03 gene                                                                    | -1.01 | 0.54  | -1.11 | 0.553 | -1.47 | 0.019 | -1.12 | 0.474 | -1.18 |
| 1460207_s_at | E2f5               | E2F transcription factor 5                                                                    | -1.24 | 0.079 | -1.12 | 0.361 | -1.15 | 0.092 | -1.16 | 0.47  | -1.17 |
| 1451554_a_at | Aph1a              | anterior pharynx defective 1a homolog (C. elegans)                                            | -1.05 | 0.627 | -1.29 | 0.043 | -1.19 | 0.329 | -1.54 | 0.093 | -1.27 |
| 1437050_s_at | Angel2             | angel homolog 2 (Drosophila)                                                                  | -1.05 | 0.494 | -1.01 | 0.939 | -1.58 | 0.043 | -1.53 | 0.003 | -1.29 |
| 1424564_at   | 2410001C21Rik      | RIKEN cDNA 2410001C21 gene                                                                    | -1.06 | 0.537 | -1.41 | 0.113 | -1.08 | 0.608 | -1.05 | 0.221 | -1.15 |
| 1448248_at   | Crk                | v-crk sarcoma virus CT10 oncogene homolog (avian)                                             | -1.07 | 0.664 | -1.14 | 0.004 | -1.33 | 0.064 | -1.39 | 0.005 | -1.23 |
| 1452992_at   | LOC668450 /// LOC  | similar to cell division cycle 26 /// similar to cell division cycle 26 /// similar to cell c | -1.35 | 0.256 | -1.11 | 0.393 | -1.08 | 0.446 | -1.21 | 0.391 | -1.19 |
| 1419141_at   | Crygd              | crystallin, gamma D                                                                           | -1.04 | 0.946 | -1.18 | 0.272 | -1.3  | 0.106 | -1.15 | 0.778 | -1.17 |
| 1436740_at   | A430108E01Rik      | RIKEN cDNA A430108E01 gene                                                                    | -1.09 | 0.357 | -1.16 | 0.03  | -1.27 | 0.182 | -1.53 | 0.097 | -1.26 |
| 1417465_at   | Fnta               | farnesyltransferase, CAAAX box, alpha                                                         | -1.11 | 0.113 | -1.09 | 0.432 | -1.32 | 0     | -1.25 | 0.108 | -1.19 |
| 1452422_a_at | Snrpb2             | U2 small nuclear ribonucleoprotein B                                                          | -1.16 | 0.15  | -1.07 | 0.497 | -1.29 | 0.008 | -1.28 | 0.21  | -1.2  |
| 1430398_at   | 4921517O11Rik      | RIKEN cDNA 4921517O11 gene                                                                    | -1.1  | 0.733 | -1.47 | 0.45  | -1.02 | 0.895 | -1.13 | 0.869 | -1.18 |
| 1455273_at   | ---                | ---                                                                                           | -1.13 | 0.732 | -1.07 | 0.736 | -1.32 | 0.142 | -1.1  | 0.727 | -1.16 |
| 1415788_at   | Ublcp1             | ubiquitin-like domain containing CTD phosphatase 1                                            | -1.16 | 0.197 | -1.15 | 0.154 | -1.19 | 0.14  | -1.18 | 0.307 | -1.17 |
| 1437456_x_at | Ythdf1             | YTH domain family 1                                                                           | -1.11 | 0.2   | -1.22 | 0.039 | -1.18 | 0.079 | -1.05 | 0.509 | -1.14 |
| 1455290_at   | Znrf2              | zinc and ring finger 2                                                                        | -1.22 | 0.244 | -1.19 | 0.309 | -1.1  | 0.561 | -1.4  | 0.212 | -1.23 |
| 1448828_at   | Smc6               | structural maintenance of chromosomes 6                                                       | -1.18 | 0.231 | -1.26 | 0.135 | -1.07 | 0.636 | -1.05 | 0.766 | -1.14 |
| 1445440_at   | A430106J12Rik      | RIKEN cDNA A430106J12 gene                                                                    | -1.34 | 0.023 | -1.05 | 0.81  | -1.14 | 0.467 | -1.02 | 0.852 | -1.14 |
| 1424033_at   | Sfrs7              | splicing factor, arginine/serine-rich 7                                                       | -1.2  | 0.372 | -1.15 | 0.106 | -1.15 | 0.248 | -1.32 | 0.124 | -1.21 |
| 1431465_s_at | Fyttd1             | forty-two-three domain containing 1                                                           | -1.27 | 0.509 | -1.18 | 0.599 | -1.07 | 0.802 | -1.19 | 0.294 | -1.18 |
| 1428302_at   | Mrpl48             | mitochondrial ribosomal protein L48                                                           | -1.22 | 0.016 | -1.13 | 0.122 | -1.15 | 0.25  | -1.09 | 0.683 | -1.15 |
| 1454989_at   | Cssp1              | centrosome and spindle pole associated protein 1                                              | -1.35 | 0.164 | -1.14 | 0.319 | -1.04 | 0.785 | -1.1  | 0.734 | -1.16 |
| 1431610_at   | 5330439A09Rik      | RIKEN cDNA 5330439A09 gene                                                                    | -1.06 | 0.926 | -1.1  | 0.851 | -1.39 | 0.206 | -1.07 | 0.869 | -1.16 |
| 1434328_at   | Rpl15              | ribosomal protein L15                                                                         | -1.15 | 0.295 | -1.05 | 0.351 | -1.34 | 0.099 | -1.58 | 0.078 | -1.28 |
| 1435341_at   | Ppig               | peptidyl-prolyl isomerase G (cyclophilin G)                                                   | -1.13 | 0.452 | -1.03 | 0.832 | -1.39 | 0.065 | -1.15 | 0.325 | -1.18 |
| 1451325_at   | Fyttd1             | forty-two-three domain containing 1                                                           | -1.21 | 0.496 | -1.06 | 0.854 | -1.25 | 0.131 | -1.25 | 0.36  | -1.19 |
| 1423149_at   | Skp1a              | S-phase kinase-associated protein 1A                                                          | -1.02 | 0.865 | -1.11 | 0.419 | -1.43 | 0.002 | -1    | 0.989 | -1.14 |
| 1423108_at   | Slc25a20           | solute carrier family 25 (mitochondrial carnitine/acylcarnitine translocase), memb            | -1.04 | 0.921 | -1.45 | 0.186 | -1.09 | 0.568 | -1.4  | 0.271 | -1.24 |
| 1426954_at   | Trim33 /// 8030451 | tripartite motif protein 33 /// RIKEN cDNA 8030451N04 gene                                    | -1.3  | 0.101 | -1.12 | 0.264 | -1.1  | 0.283 | -1.28 | 0.011 | -1.2  |
| 1445239_at   | Gatad2a            | GATA zinc finger domain containing 2A                                                         | -1.13 | 0.682 | -1.17 | 0.442 | -1.2  | 0.417 | -1.22 | 0.109 | -1.18 |
| 1428589_at   | Mrpl41             | mitochondrial ribosomal protein L41                                                           | -1.13 | 0.201 | -1.16 | 0.042 | -1.21 | 0.153 | -1.12 | 0.323 | -1.15 |
| 1436371_at   | Recql              | RecQ protein-like                                                                             | -1.19 | 0.576 | -1.1  | 0.733 | -1.22 | 0.436 | -1.5  | 0.16  | -1.25 |
| 1452825_at   | 5330410G16Rik      | RIKEN cDNA 5330410G16 gene                                                                    | -1.2  | 0.61  | -1.29 | 0.595 | -1.03 | 0.796 | -1.02 | 0.869 | -1.14 |
| 1427406_at   | Trip11             | thyroid hormone receptor interactor 11                                                        | -1.15 | 0.707 | -1.02 | 0.942 | -1.39 | 0.232 | -1.6  | 0.26  | -1.29 |
| 1417557_at   | Ubx1               | UBX domain containing 1                                                                       | -1.09 | 0.286 | -1.18 | 0.138 | -1.23 | 0.021 | -1.6  | 0.082 | -1.28 |
| 1435001_at   | Pla2               | phospholipase A2, activating protein                                                          | -1.24 | 0.167 | -1.13 | 0.508 | -1.14 | 0.037 | -1.07 | 0.793 | -1.14 |
| 1429633_at   | Lcor               | ligand dependent nuclear receptor corepressor                                                 | -1.05 | 0.467 | -1.16 | 0.078 | -1.31 | 0.07  | -1.17 | 0.235 | -1.17 |
| 1454894_at   | Smurf2             | SMAD specific E3 ubiquitin protein ligase 2                                                   | -1.17 | 0.087 | -1.13 | 0.021 | -1.21 | 0.094 | -1.42 | 0.182 | -1.23 |
| 1417846_at   | Ulk2               | Unc-51 like kinase 2 (C. elegans)                                                             | -1.08 | 0.575 | -1.17 | 0.089 | -1.26 | 0.111 | -1.4  | 0.287 | -1.23 |
| 1436995_a_at | Rpl26              | ribosomal protein L26                                                                         | -1.17 | 0.094 | -1.04 | 0.635 | -1.31 | 0.004 | -1.32 | 0.013 | -1.21 |
| 1444049_at   | Adat1              | adenosine deaminase, tRNA-specific 1                                                          | -1.48 | 0.34  | -1.09 | 0.733 | -1.02 | 0.959 | -1.08 | 0.541 | -1.17 |
| 1418934_at   | Mab21l2            | mab-21-like 2 (C. elegans)                                                                    | -1.04 | 0.846 | -1.26 | 0.388 | -1.22 | 0.637 | -1.06 | 0.818 | -1.14 |
| 1437406_x_at | Igfbp4             | insulin-like growth factor binding protein 4                                                  | -1.08 | 0.437 | -1.13 | 0.439 | -1.31 | 0.55  | -1.17 | 0.765 | -1.17 |

|              |               |                                                                                       |       |       |       |       |       |       |       |       |       |
|--------------|---------------|---------------------------------------------------------------------------------------|-------|-------|-------|-------|-------|-------|-------|-------|-------|
| 1416210_at   | Imp3          | IMP3, U3 small nucleolar ribonucleoprotein, homolog (yeast)                           | -1.09 | 0.512 | -1.26 | 0.034 | -1.16 | 0.254 | -1.36 | 0.077 | -1.22 |
| 1457241_at   | Lrrc48        | Leucine rich repeat containing 48                                                     | -1.16 | 0.406 | -1.03 | 0.898 | -1.34 | 0.207 | -1.47 | 0.223 | -1.25 |
| 1446306_at   | ---           | ---                                                                                   | -1.14 | 0.531 | -1.08 | 0.861 | -1.29 | 0.56  | -1.08 | 0.819 | -1.15 |
| 1427088_at   | Ccnt2         | cyclin T2                                                                             | -1.17 | 0.348 | -1.18 | 0.3   | -1.15 | 0.458 | -1.21 | 0.34  | -1.18 |
| 1446562_at   | Sh3kbp1       | SH3-domain kinase binding protein 1                                                   | -1.41 | 0.2   | -1.09 | 0.88  | -1.05 | 0.879 | -1.5  | 0.028 | -1.26 |
| 1429698_at   | Mterf         | mitochondrial transcription termination factor                                        | -1.31 | 0.492 | -1.03 | 0.838 | -1.19 | 0.277 | -1.37 | 0.139 | -1.22 |
| 1457349_at   | LOC639426     | similar to Tetratricopeptide repeat protein 6 (TPR repeat protein 6)                  | -1.03 | 0.953 | -1.28 | 0.387 | -1.21 | 0.12  | -3.33 | 0.036 | -1.71 |
| 1455538_at   | 6330403M23Rik | RIKEN cDNA 6330403M23 gene                                                            | -1.13 | 0.2   | -1.06 | 0.525 | -1.34 | 0.024 | -1.36 | 0.182 | -1.22 |
| 1427949_at   | Zfp294        | zinc finger protein 294                                                               | -1.15 | 0.096 | -1.14 | 0.049 | -1.21 | 0.109 | -1.05 | 0.593 | -1.14 |
| 1435531_at   | Usp3          | ubiquitin specific peptidase 3                                                        | -1.11 | 0.446 | -1.28 | 0.011 | -1.12 | 0.247 | -1.71 | 0.012 | -1.3  |
| 1454740_at   | Mib1          | mindbomb homolog 1 (Drosophila)                                                       | -1.14 | 0.637 | -1.01 | 0.925 | -1.41 | 0.044 | -1.13 | 0.676 | -1.17 |
| 1444585_at   | Adc           | arginine decarboxylase                                                                | -1.17 | 0.285 | -1.06 | 0.639 | -1.28 | 0.175 | -1.1  | 0.36  | -1.15 |
| 1436698_x_at | BC054438      | cDNA sequence BC054438                                                                | -1.07 | 0.81  | -1.01 | 0.935 | -1.54 | 0.026 | -1.77 | 0.252 | -1.35 |
| 1429159_at   | 4631408O11Rik | RIKEN cDNA 4631408O11 gene                                                            | -1.16 | 0.61  | -1.26 | 0.054 | -1.09 | 0.821 | -2.06 | 0.103 | -1.39 |
| 1424282_at   | Pet112l       | PET112-like (yeast)                                                                   | -1.08 | 0.696 | -1.23 | 0.416 | -1.2  | 0.382 | -1.22 | 0.088 | -1.18 |
| 1429890_at   | A930007D18Rik | RIKEN cDNA A930007D18 gene                                                            | -1.12 | 0.615 | -1.07 | 0.849 | -1.32 | 0.51  | -1.7  | 0.112 | -1.3  |
| 1435843_x_at | Mrps9         | mitochondrial ribosomal protein S9                                                    | -1.12 | 0.186 | -1.07 | 0.28  | -1.34 | 0.247 | -1.25 | 0.014 | -1.19 |
| 1424197_s_at | Fance         | Fanconi anemia, complementation group E                                               | -1.16 | 0.57  | -1.25 | 0.308 | -1.09 | 0.691 | -1.6  | 0.271 | -1.27 |
| 1454987_a_at | H2-Ke6        | H2-K region expressed gene 6                                                          | -1.02 | 0.904 | -1.25 | 0.247 | -1.25 | 0.053 | -1.77 | 0.215 | -1.32 |
| 1452692_a_at | Ndufv2        | NADH dehydrogenase (ubiquinone) flavoprotein 2                                        | -1.04 | 0.649 | -1.21 | 0.114 | -1.27 | 0.064 | -1.08 | 0.499 | -1.15 |
| 1426841_at   | Ythdf3        | YTH domain family 3                                                                   | -1.05 | 0.013 | -1.25 | 0.008 | -1.2  | 0.04  | -1.15 | 0.342 | -1.16 |
| 1456803_at   | Polr3c        | Polymerase (RNA) III (DNA directed) polypeptide C                                     | -1.01 | 0.977 | -1.16 | 0.535 | -1.37 | 0.287 | -1.29 | 0.211 | -1.21 |
| 1432458_at   | 1700011F14Rik | RIKEN cDNA 1700011F14 gene                                                            | -1.07 | 0.178 | -1.08 | 0.654 | -1.39 | 0.111 | -1.29 | 0.185 | -1.21 |
| 1437055_x_at | Mfsd1         | Major facilitator superfamily domain containing 1                                     | -1.52 | 0.06  | -1.04 | 0.757 | -1.04 | 0.845 | -1.26 | 0.203 | -1.21 |
| 1418316_a_at | Mark3         | MAP/microtubule affinity-regulating kinase 3                                          | -1.07 | 0.783 | -1.22 | 0.112 | -1.22 | 0.361 | -1.01 | 0.96  | -1.13 |
| 1416655_at   | C1galt1c1     | C1GALT1-specific chaperone 1                                                          | -1.06 | 0.095 | -1.12 | 0.248 | -1.35 | 0.008 | -1.01 | 0.889 | -1.13 |
| 1425482_s_at | Ankmy2        | ankyrin repeat and MYND domain containing 2                                           | -1.16 | 0.033 | -1.11 | 0.459 | -1.23 | 0.191 | -1.37 | 0.164 | -1.22 |
| 1434718_at   | Cul3          | cullin 3                                                                              | -1.19 | 0.57  | -1.21 | 0.3   | -1.1  | 0.591 | -1.15 | 0.417 | -1.16 |
| 1418704_at   | S100a13       | S100 calcium binding protein A13                                                      | -1.03 | 0.714 | -1.07 | 0.638 | -1.49 | 0.025 | -1.11 | 0.677 | -1.17 |
| 1418101_a_at | Rtn3          | reticulin 3                                                                           | -1.09 | 0.383 | -1.25 | 0.094 | -1.16 | 0.075 | -1.04 | 0.77  | -1.14 |
| 1432423_a_at | C530008M17Rik | RIKEN cDNA C530008M17 gene                                                            | -1.27 | 0.468 | -1.2  | 0.349 | -1.04 | 0.778 | -1.17 | 0.382 | -1.17 |
| 1451901_at   | Smarca3       | SWI/SNF related, matrix associated, actin dependent regulator of chromatin, subunit 3 | -1.25 | 0.023 | -1.03 | 0.937 | -1.25 | 0.15  | -1.31 | 0.331 | -1.21 |
| 1429709_at   | Pmpcb         | peptidase (mitochondrial processing) beta                                             | -1.1  | 0.233 | -1.26 | 0.042 | -1.14 | 0.039 | -1.07 | 0.577 | -1.14 |
| 1435139_at   | Narg1         | NMDA receptor-regulated gene 1                                                        | -1.19 | 0.26  | -1.15 | 0.122 | -1.15 | 0.258 | -1.02 | 0.948 | -1.13 |
| 1448998_at   | Lpo           | lactoperoxidase                                                                       | -1.33 | 0.588 | -1.13 | 0.499 | -1.06 | 0.635 | -2    | 0.12  | -1.38 |
| 1451902_at   | Zfp758        | zinc finger protein 758                                                               | -1.15 | 0.011 | -1.19 | 0.019 | -1.14 | 0.066 | -1.39 | 0.061 | -1.22 |
| 1435901_at   | Usp40         | ubiquitin specific peptidase 40                                                       | -1.06 | 0.693 | -1.14 | 0.336 | -1.32 | 0.063 | -1.34 | 0.324 | -1.21 |
| 1423065_at   | Dnmt3a        | DNA methyltransferase 3A                                                              | -1.07 | 0.575 | -1.18 | 0.344 | -1.24 | 0.386 | -1.19 | 0.274 | -1.17 |
| 1434099_at   | Ppargc1a      | Peroxisome proliferative activated receptor, gamma, coactivator 1 alpha               | -1.23 | 0.456 | -1.26 | 0.499 | -1.03 | 0.918 | -2.55 | 0.422 | -1.52 |
| 1436691_x_at | Prdx1         | peroxiredoxin 1                                                                       | -1.16 | 0.07  | -1.11 | 0.411 | -1.22 | 0.011 | -1.32 | 0.053 | -1.2  |
| 1449623_at   | Txnrd3        | thioredoxin reductase 3                                                               | -1.11 | 0.092 | -1.06 | 0.741 | -1.35 | 0.069 | -1.27 | 0.218 | -1.2  |
| 1434065_at   | Cwf19l1       | CWF19-like 1, cell cycle control (S. pombe)                                           | -1.27 | 0.01  | -1.17 | 0.386 | -1.07 | 0.388 | -1.17 | 0.003 | -1.17 |
| 1418038_s_at | Dusp19        | dual specificity phosphatase 19                                                       | -1.08 | 0.021 | -1.16 | 0.186 | -1.26 | 0.063 | -1.18 | 0.385 | -1.17 |
| 1451968_at   | Xrcc5         | X-ray repair complementing defective repair in Chinese hamster cells 5                | -1.32 | 0.017 | -1.05 | 0.692 | -1.15 | 0.339 | -1.28 | 0.049 | -1.2  |
| 1452234_s_at | D16Bwg1494e   | DNA segment, Chr 16, Brigham & Women's Genetics 1494 expressed                        | -1.1  | 0.695 | -1.24 | 0.416 | -1.16 | 0.637 | -1.35 | 0.102 | -1.21 |
| 1434618_at   | ---           | ---                                                                                   | -1.21 | 0.075 | -1.18 | 0.083 | -1.1  | 0.573 | -1.3  | 0.094 | -1.2  |
| 1447066_at   | ---           | Adult inner ear cDNA, RIKEN full-length enriched library, clone:F930039H20 proc       | -1.35 | 0.745 | -1.07 | 0.891 | -1.11 | 0.734 | -2.69 | 0.434 | -1.55 |
| 1455682_at   | AA536808      | expressed sequence AA536808                                                           | -1.17 | 0.027 | -1.16 | 0.288 | -1.16 | 0.322 | -1.35 | 0.082 | -1.21 |
| 1433302_at   | Cdh10         | cadherin 10                                                                           | -1.23 | 0.504 | -1.1  | 0.812 | -1.17 | 0.586 | -1.48 | 0.209 | -1.24 |
| 1428236_at   | Acbd5         | acyl-Coenzyme A binding domain containing 5                                           | -1.07 | 0.671 | -1.16 | 0.067 | -1.27 | 0.025 | -1.21 | 0.144 | -1.18 |
| 1457302_at   | Slc20a2       | Solute carrier family 20, member 2                                                    | -1.23 | 0.107 | -1.17 | 0.351 | -1.09 | 0.592 | -1.39 | 0.246 | -1.22 |
| 1457735_at   | ---           | Transcribed locus                                                                     | -1.16 | 0.168 | -1.03 | 0.965 | -1.34 | 0.538 | -1.02 | 0.708 | -1.14 |
| 1444402_at   | Zc3h12c       | zinc finger CCCH type containing 12C                                                  | -1.12 | 0.125 | -1.32 | 0.029 | -1.07 | 0.698 | -1.31 | 0.149 | -1.21 |

|              |                   |                                                                                       |       |       |       |       |       |       |       |       |       |
|--------------|-------------------|---------------------------------------------------------------------------------------|-------|-------|-------|-------|-------|-------|-------|-------|-------|
| 1448488_at   | Mrps5             | mitochondrial ribosomal protein S5                                                    | -1.06 | 0.738 | -1.13 | 0.132 | -1.32 | 0.019 | -1.11 | 0.515 | -1.15 |
| 1427031_s_at | Ccdc52            | coiled-coil domain containing 52                                                      | -1.19 | 0.44  | -1.29 | 0.213 | -1.03 | 0.53  | -1.33 | 0.054 | -1.21 |
| 1420870_at   | Mllt10            | myeloid/lymphoid or mixed lineage-leukemia translocation to 10 homolog (Drosophila)   | -1.21 | 0.401 | -1.29 | 0.048 | -1.02 | 0.918 | -1.12 | 0.41  | -1.16 |
| 1457070_at   | Uhrf2             | Ubiquitin-like, containing PHD and RING finger domains 2                              | -1.1  | 0.628 | -1.18 | 0.62  | -1.21 | 0.313 | -1.2  | 0.689 | -1.17 |
| 1423622_a_at | Ccnl1             | cyclin L1                                                                             | -1.04 | 0.849 | -1.13 | 0.188 | -1.37 | 0.097 | -1.31 | 0.199 | -1.21 |
| 1453475_at   | 4930445K14Rik     | RIKEN cDNA 4930445K14 gene                                                            | -1.18 | 0.045 | -1.08 | 0.622 | -1.23 | 0.382 | -1.26 | 0.004 | -1.19 |
| 1424634_at   | Tceal1            | transcription elongation factor A (SII)-like 1                                        | -1.06 | 0.808 | -1.15 | 0.623 | -1.31 | 0.115 | -1.15 | 0.346 | -1.17 |
| 1453774_at   | 2810002O09Rik     | RIKEN cDNA 2810002O09 gene                                                            | -1.06 | 0.63  | -1.12 | 0.597 | -1.34 | 0.209 | -1.32 | 0.371 | -1.21 |
| 1448858_at   | Ulk2              | Unc-51 like kinase 2 (C. elegans)                                                     | -1.09 | 0.262 | -1.29 | 0.191 | -1.12 | 0.56  | -1.13 | 0.217 | -1.16 |
| 1459359_at   | ---               | 0 day neonate cerebellum cDNA, RIKEN full-length enriched library, clone:C2300        | -1.09 | 0.552 | -1.26 | 0.662 | -1.14 | 0.75  | -1.76 | 0.315 | -1.31 |
| 1434949_at   | Armc8             | armadillo repeat containing 8                                                         | -1.16 | 0.529 | -1.08 | 0.501 | -1.25 | 0.103 | -1.24 | 0.413 | -1.18 |
| 1416668_at   | 4921531G14Rik     | RIKEN cDNA 4921531G14 gene                                                            | -1.1  | 0.254 | -1.02 | 0.591 | -1.44 | 0.001 | -1.38 | 0.247 | -1.24 |
| 1426152_a_at | Kitl              | kit ligand                                                                            | -1.03 | 0.862 | -1.26 | 0.473 | -1.22 | 0.454 | -1.01 | 0.924 | -1.13 |
| 1435096_at   | Ric8b             | resistance to inhibitors of cholinesterase 8 homolog B (C. elegans)                   | -1.13 | 0.424 | -1.28 | 0.067 | -1.09 | 0.499 | -1.37 | 0.054 | -1.22 |
| 1449056_at   | E330009J07Rik     | RIKEN cDNA E330009J07 gene                                                            | -1.03 | 0.846 | -1.16 | 0.236 | -1.32 | 0.145 | -1.83 | 0.013 | -1.34 |
| 1438821_at   | Rfwd2             | Ring finger and WD repeat domain 2                                                    | -1.22 | 0.678 | -1.07 | 0.801 | -1.2  | 0.379 | -1.26 | 0.251 | -1.19 |
| 1425480_at   | Cnot6l            | CCR4-NOT transcription complex, subunit 6-like                                        | -1    | 0.995 | -1.25 | 0.04  | -1.27 | 0.041 | -1.26 | 0.512 | -1.2  |
| 1423324_at   | Pnn               | pinin                                                                                 | -1.16 | 0.453 | -1.11 | 0.543 | -1.21 | 0.468 | -1.33 | 0.414 | -1.2  |
| 1450973_s_at | Mapkbp1           | mitogen activated protein kinase binding protein 1                                    | -1.06 | 0.738 | -1.16 | 0.256 | -1.29 | 0.207 | -1.27 | 0.29  | -1.19 |
| 1436436_at   | Cnih4             | cornichon homolog 4 (Drosophila)                                                      | -1.03 | 0.748 | -1.26 | 0.129 | -1.21 | 0.086 | -1.12 | 0.28  | -1.16 |
| 1439962_at   | 2310010J17Rik     | RIKEN cDNA 2310010J17 gene                                                            | -1.26 | 0.256 | -1.03 | 0.862 | -1.22 | 0.424 | -1.18 | 0.767 | -1.17 |
| 1416926_at   | Trp53inp1         | transformation related protein 53 inducible nuclear protein 1                         | -1.06 | 0.784 | -1.12 | 0.478 | -1.33 | 0.287 | -1.06 | 0.883 | -1.14 |
| 1443534_at   | ---               | ---                                                                                   | -1.03 | 0.629 | -1.04 | 0.831 | -1.54 | 0.099 | -1.81 | 0.129 | -1.35 |
| 1422126_a_at | Nudt13            | nudix (nucleoside diphosphate linked moiety X)-type motif 13                          | -1.28 | 0.328 | -1.01 | 0.958 | -1.23 | 0.119 | -1.35 | 0.214 | -1.22 |
| 1430578_at   | Eif4g3            | eukaryotic translation initiation factor 4 gamma, 3                                   | -1.05 | 0.943 | -1.13 | 0.598 | -1.34 | 0.076 | -1.08 | 0.804 | -1.15 |
| 1450840_a_at | Rpl39             | ribosomal protein L39                                                                 | -1.04 | 0.753 | -1.08 | 0.638 | -1.43 | 0.017 | -1.24 | 0.008 | -1.2  |
| 1452133_at   | Uqcrrh            | ubiquinol-cytochrome c reductase hinge protein                                        | -1.13 | 0.094 | -1.2  | 0.029 | -1.15 | 0.381 | -1.15 | 0.39  | -1.16 |
| 1430344_at   | 2900064P18Rik     | RIKEN cDNA 2900064P18 gene                                                            | -1.01 | 0.949 | -1.3  | 0.474 | -1.21 | 0.72  | -1.6  | 0.385 | -1.28 |
| 1448032_at   | Azi2              | 5-azacytidine induced gene 2                                                          | -1.04 | 0.851 | -1.19 | 0.104 | -1.27 | 0.234 | -1.17 | 0.185 | -1.17 |
| 1453160_at   | Thrap1            | thyroid hormone receptor associated protein 1                                         | -1.06 | 0.351 | -1.06 | 0.699 | -1.43 | 0.06  | -1.12 | 0.353 | -1.17 |
| 1441642_at   | Large             | Like-glycosyltransferase                                                              | -1.36 | 0.328 | -1.01 | 0.976 | -1.16 | 0.669 | -1.2  | 0.412 | -1.18 |
| 1431198_x_at | 9430038I01Rik     | RIKEN cDNA 9430038I01 gene                                                            | -1.09 | 0.61  | -1.43 | 0.272 | -1.03 | 0.871 | -1.3  | 0.284 | -1.21 |
| 1435977_at   | Hdgfrp3           | hepatoma-derived growth factor, related protein 3                                     | -1.1  | 0.467 | -1.11 | 0.802 | -1.28 | 0.3   | -1.22 | 0.594 | -1.18 |
| 1453186_at   | 5730406M06Rik     | RIKEN cDNA 5730406M06 gene                                                            | -1.09 | 0.53  | -1.12 | 0.619 | -1.29 | 0.181 | -1.19 | 0.645 | -1.17 |
| 1437751_at   | Ppargc1a          | peroxisome proliferative activated receptor, gamma, coactivator 1 alpha               | -1.11 | 0.362 | -1.24 | 0.36  | -1.13 | 0.195 | -1.95 | 0.146 | -1.36 |
| 1435462_at   | LOC433022         | hypothetical LOC433022                                                                | -1.05 | 0.549 | -1.27 | 0.304 | -1.17 | 0.499 | -1.62 | 0.166 | -1.28 |
| 1442093_at   | Adc               | Arginine decarboxylase                                                                | -1.27 | 0.68  | -1.02 | 0.962 | -1.22 | 0.364 | -1.34 | 0.529 | -1.21 |
| 1421560_at   | Snai3             | snail homolog 3 (Drosophila)                                                          | -1.23 | 0.153 | -1.04 | 0.89  | -1.24 | 0.304 | -1.29 | 0.491 | -1.2  |
| 1438859_x_at | Rps29 /// LOC6299 | ribosomal protein S29 /// similar to 40S ribosomal protein S29 /// similar to 40S rib | -1.18 | 0.068 | -1.03 | 0.856 | -1.29 | 0.013 | -1.22 | 0.051 | -1.18 |
| 1448598_at   | Mmp17             | matrix metalloproteinase 17                                                           | -1.24 | 0.337 | -1.17 | 0.754 | -1.08 | 0.767 | -1.13 | 0.049 | -1.15 |
| 1426675_at   | Tomm70a           | translocase of outer mitochondrial membrane 70 homolog A (yeast)                      | -1.08 | 0.694 | -1.07 | 0.101 | -1.37 | 0.074 | -1.04 | 0.688 | -1.14 |
| 1433738_at   | 5730445M16Rik     | RIKEN cDNA 5730445M16 gene                                                            | -1.02 | 0.752 | -1.16 | 0.201 | -1.33 | 0.036 | -1.29 | 0.089 | -1.2  |
| 1429050_at   | Chic2             | cysteine-rich hydrophobic domain 2                                                    | -1.03 | 0.709 | -1.23 | 0.25  | -1.25 | 0.077 | -1.06 | 0.509 | -1.14 |
| 1428161_a_at | Chchd2            | coiled-coil-helix-coiled-coil-helix domain containing 2                               | -1.13 | 0.045 | -1.19 | 0.163 | -1.15 | 0.033 | -1.13 | 0.027 | -1.15 |
| 1453229_s_at | Uqcrrh            | ubiquinol-cytochrome c reductase hinge protein                                        | -1.21 | 0.046 | -1.11 | 0.191 | -1.16 | 0.207 | -1.59 | 0.083 | -1.27 |
| 1434041_at   | Appbp2            | amyloid beta precursor protein (cytoplasmic tail) binding protein 2                   | -1.12 | 0.327 | -1.06 | 0.67  | -1.34 | 0.134 | -1.28 | 0.135 | -1.2  |
| 1441973_at   | Zfp295            | zinc finger protein 295                                                               | -1.04 | 0.178 | -1.17 | 0.596 | -1.3  | 0.413 | -1.16 | 0.157 | -1.17 |
| 1434562_at   | Mfap3             | microfibrillar-associated protein 3                                                   | -1.15 | 0.305 | -1.05 | 0.639 | -1.31 | 0.03  | -1.1  | 0.505 | -1.15 |
| 1418544_at   | Kcnip3            | Kv channel interacting protein 3, calsenilin                                          | -1.26 | 0.375 | -1.12 | 0.142 | -1.11 | 0.516 | -1.24 | 0.446 | -1.18 |
| 1457355_at   | ---               | ---                                                                                   | -1.23 | 0.329 | -1.19 | 0.384 | -1.07 | 0.555 | -1.19 | 0.518 | -1.17 |
| 1441339_at   | Chd9              | chromodomain helicase DNA binding protein 9                                           | -1.26 | 0.346 | -1.1  | 0.288 | -1.13 | 0.443 | -1.38 | 0.101 | -1.22 |
| 1453399_at   | Ccnt2             | Cyclin T2                                                                             | -1.1  | 0.577 | -1.09 | 0.494 | -1.31 | 0.24  | -1.55 | 0.004 | -1.26 |
| 1426776_at   | Wasl              | Wiskott-Aldrich syndrome-like (human)                                                 | -1.07 | 0.264 | -1.08 | 0.097 | -1.36 | 0.182 | -1    | 0.995 | -1.13 |

|              |                    |                                                                                                                                  |       |       |       |       |       |       |       |       |       |
|--------------|--------------------|----------------------------------------------------------------------------------------------------------------------------------|-------|-------|-------|-------|-------|-------|-------|-------|-------|
| 1419945_s_at | Rab2               | RAB2, member RAS oncogene family                                                                                                 | -1.14 | 0.194 | -1.05 | 0.207 | -1.3  | 0.019 | -1.18 | 0.383 | -1.17 |
| 1445317_at   | Sdha               | Succinate dehydrogenase complex, subunit A, flavoprotein (Fp)                                                                    | -1    | 0.909 | -1.09 | 0.547 | -1.49 | 0.065 | -1.36 | 0.224 | -1.23 |
| 1455036_s_at | Ndufc2 /// LOC6756 | NADH dehydrogenase (ubiquinone) 1, subcomplex unknown, 2 /// similar to NADH dehydrogenase (ubiquinone) 1, subcomplex unknown, 2 | -1.17 | 0.017 | -1.1  | 0.219 | -1.21 | 0.039 | -1.06 | 0.212 | -1.14 |
| 1459773_x_at | Snip1              | Smad nuclear interacting protein 1                                                                                               | -1.1  | 0.228 | -1.23 | 0.107 | -1.15 | 0.373 | -1.29 | 0.146 | -1.19 |
| 1426531_at   | Zmynd11            | zinc finger, MYND domain containing 11                                                                                           | -1.08 | 0.258 | -1.14 | 0.329 | -1.27 | 0.075 | -1.52 | 0.242 | -1.25 |
| 1423696_a_at | Psm6               | proteasome (prosome, macropain) 26S subunit, non-ATPase, 6                                                                       | -1.18 | 0.104 | -1.04 | 0.764 | -1.27 | 0.02  | -1.19 | 0.362 | -1.17 |
| 1435207_at   | Dixdc1             | DIX domain containing 1                                                                                                          | -1.23 | 0.421 | -1.11 | 0.564 | -1.14 | 0.055 | -1.64 | 0.039 | -1.28 |
| 1455543_at   | Klhl18             | kelch-like 18 (Drosophila)                                                                                                       | -1.24 | 0.423 | -1.25 | 0.348 | -1.01 | 0.942 | -1.47 | 0.234 | -1.24 |
| 1423211_at   | Nola3              | nucleolar protein family A, member 3                                                                                             | -1.22 | 0.226 | -1.09 | 0.151 | -1.17 | 0.276 | -1.16 | 0.271 | -1.16 |
| 1424577_at   | Msto1              | misato homolog 1 (Drosophila)                                                                                                    | -1.13 | 0.222 | -1.13 | 0.661 | -1.22 | 0     | -1.14 | 0.477 | -1.15 |
| 1431745_a_at | Zc3h14             | zinc finger CCCH type containing 14                                                                                              | -1.21 | 0.133 | -1.27 | 0.005 | -1.02 | 0.824 | -1.02 | 0.861 | -1.13 |
| 1428505_at   | 2310015N07Rik      | RIKEN cDNA 2310015N07 gene                                                                                                       | -1.17 | 0.107 | -1.07 | 0.19  | -1.25 | 0.002 | -1.18 | 0.071 | -1.17 |
| 1422581_at   | Pias1              | protein inhibitor of activated STAT 1                                                                                            | -1.18 | 0.223 | -1.05 | 0.648 | -1.26 | 0.152 | -1.43 | 0.048 | -1.23 |
| 1435803_a_at | Eif4e2             | eukaryotic translation initiation factor 4E member 2                                                                             | -1.16 | 0.223 | -1.18 | 0.246 | -1.14 | 0.243 | -1.1  | 0.381 | -1.14 |
| 1428594_at   | Garn1              | GTPase activating RANGAP domain-like 1                                                                                           | -1.21 | 0.08  | -1.09 | 0.452 | -1.17 | 0.247 | -1.2  | 0.353 | -1.17 |
| 1448689_at   | Rras2              | related RAS viral (r-ras) oncogene homolog 2                                                                                     | -1.05 | 0.52  | -1.07 | 0.013 | -1.42 | 0.038 | -2.29 | 0.097 | -1.46 |
| 1428760_at   | Snapp3             | small nuclear RNA activating complex, polypeptide 3                                                                              | -1.3  | 0.016 | -1.09 | 0.571 | -1.1  | 0.379 | -1.24 | 0.437 | -1.18 |
| 1443167_at   | Rnf12              | Ring finger protein 12                                                                                                           | -1    | 0.999 | -1.05 | 0.739 | -1.56 | 0     | -1.21 | 0.071 | -1.21 |
| 1429512_at   | Zbbp2              | zona pellucida binding protein 2                                                                                                 | -1.11 | 0.821 | -1.37 | 0.533 | -1.04 | 0.877 | -1.24 | 0.489 | -1.19 |
| 1428230_at   | Prkn               | protein kinase C, nu                                                                                                             | -1.12 | 0.457 | -1.24 | 0.213 | -1.12 | 0.295 | -1.89 | 0.082 | -1.34 |
| 1424430_at   | Mterfd2            | MTERF domain containing 2                                                                                                        | -1.19 | 0.215 | -1.19 | 0.171 | -1.1  | 0.615 | -1.14 | 0.438 | -1.15 |
| 1420139_s_at | Krr1               | KRR1, small subunit (SSU) processome component, homolog (yeast)                                                                  | -1.15 | 0.38  | -1.14 | 0.133 | -1.17 | 0.059 | -1.12 | 0.169 | -1.15 |
| 1419188_s_at | Ccl27              | chemokine (C-C motif) ligand 27                                                                                                  | -1.11 | 0.188 | -1.17 | 0.343 | -1.2  | 0.317 | -1.31 | 0.511 | -1.2  |
| 1429087_at   | 1110054O05Rik      | RIKEN cDNA 1110054O05 gene                                                                                                       | -1.3  | 0.625 | -1.21 | 0.329 | -1    | 0.997 | -1.06 | 0.589 | -1.14 |
| 1458656_at   | AW050198           | expressed sequence AW050198                                                                                                      | -1.13 | 0.489 | -1.08 | 0.478 | -1.28 | 0.141 | -1.32 | 0.061 | -1.2  |
| 1446616_at   | Gltscr1            | Glioma tumor suppressor candidate region gene 1                                                                                  | -1.09 | 0.872 | -1.2  | 0.512 | -1.19 | 0.272 | -1.08 | 0.831 | -1.14 |
| 1444315_at   | D630024D03Rik      | RIKEN cDNA D630024D03 gene                                                                                                       | -1.14 | 0.316 | -1.28 | 0.499 | -1.07 | 0.701 | -1.68 | 0.42  | -1.29 |
| 1417264_at   | Coq5               | coenzyme Q5 homolog, methyltransferase (yeast)                                                                                   | -1.07 | 0.312 | -1.15 | 0.335 | -1.27 | 0.283 | -1    | 0.999 | -1.12 |
| 1425534_at   | Stau2              | staufer (RNA binding protein) homolog 2 (Drosophila)                                                                             | -1.06 | 0.292 | -1.22 | 0.347 | -1.2  | 0.407 | -1.61 | 0.114 | -1.27 |
| 1453322_at   | Wdr33              | WD repeat domain 33                                                                                                              | -1.14 | 0.089 | -1.04 | 0.797 | -1.32 | 0.161 | -1.18 | 0.205 | -1.17 |
| 1449702_at   | Zfand2a            | zinc finger, AN1-type domain 2A                                                                                                  | -1.07 | 0.629 | -1.2  | 0.364 | -1.2  | 0.118 | -1.36 | 0.105 | -1.21 |
| 1428086_at   | Dnm1l              | dynamitin 1-like                                                                                                                 | -1.2  | 0.443 | -1.13 | 0.205 | -1.14 | 0.324 | -1.24 | 0.153 | -1.18 |
| 1439738_at   | ---                | ---                                                                                                                              | -1.21 | 0.488 | -1.04 | 0.84  | -1.23 | 0.571 | -1.23 | 0.623 | -1.18 |
| 1419489_at   | AW049604           | expressed sequence AW049604                                                                                                      | -1.11 | 0.04  | -1.05 | 0.897 | -1.35 | 0.42  | -1.61 | 0.368 | -1.28 |
| 1440384_at   | Tmcc1              | transmembrane and coiled coil domains 1                                                                                          | -1.32 | 0.13  | -1.04 | 0.49  | -1.15 | 0.136 | -1.01 | 0.973 | -1.13 |
| 1422508_at   | Atp6v1a            | ATPase, H <sup>+</sup> transporting, lysosomal V1 subunit A                                                                      | -1.2  | 0.314 | -1.09 | 0.424 | -1.19 | 0.213 | -1.15 | 0.277 | -1.16 |
| 1424893_at   | Ndel1              | nuclear distribution gene E-like homolog 1 (A. nidulans)                                                                         | -1.06 | 0.796 | -1.03 | 0.724 | -1.46 | 0.209 | -1.14 | 0.456 | -1.17 |
| 1452632_at   | LOC637741          | hypothetical protein LOC637741                                                                                                   | -1.08 | 0.531 | -1.36 | 0.141 | -1.07 | 0.786 | -1.43 | 0.103 | -1.24 |
| 1452056_s_at | Ppp3ca             | protein phosphatase 3, catalytic subunit, alpha isoform                                                                          | -1.09 | 0.274 | -1.1  | 0.255 | -1.3  | 0.019 | -1.5  | 0.107 | -1.25 |
| 1436051_at   | 9630007J19Rik      | RIKEN cDNA 9630007J19 gene                                                                                                       | -1.31 | 0.05  | -1.14 | 0.493 | -1.05 | 0.848 | -1.41 | 0.311 | -1.23 |
| 1434401_at   | Zcchc2             | zinc finger, CCHC domain containing 2                                                                                            | -1.08 | 0.492 | -1.3  | 0.094 | -1.11 | 0.459 | -1.65 | 0.058 | -1.29 |
| 1418312_at   | Zfp276             | zinc finger protein (C2H2 type) 276                                                                                              | -1.13 | 0.485 | -1.27 | 0.178 | -1.08 | 0.334 | -1.02 | 0.891 | -1.13 |
| 1436317_at   | D230012E17Rik      | RIKEN cDNA D230012E17 gene                                                                                                       | -1.1  | 0.67  | -1.15 | 0.258 | -1.22 | 0.271 | -2.35 | 0.054 | -1.46 |
| 1432749_at   | ---                | ---                                                                                                                              | -1.51 | 0.154 | -1.06 | 0.543 | -1.01 | 0.97  | -1.47 | 0.654 | -1.26 |
| 1441536_at   | Hmgcs1             | 3-hydroxy-3-methylglutaryl-Coenzyme A synthase 1                                                                                 | -1.26 | 0.136 | -1.03 | 0.927 | -1.2  | 0.065 | -1.56 | 0.43  | -1.26 |
| 1417553_at   | Plac1              | placental specific protein 1                                                                                                     | -1.25 | 0.663 | -1.01 | 0.964 | -1.23 | 0.401 | -1.04 | 0.844 | -1.14 |
| 1453145_at   | 4933439C20Rik      | RIKEN cDNA 4933439C20 gene                                                                                                       | -1.08 | 0.161 | -1.03 | 0.916 | -1.44 | 0.071 | -1.55 | 0.261 | -1.27 |
| 1446375_at   | Exoc6              | Exocyst complex component 6                                                                                                      | -1.06 | 0.91  | -1.1  | 0.149 | -1.34 | 0.628 | -1.09 | 0.871 | -1.15 |
| 1429923_x_at | Spata3             | spermatogenesis associated 3                                                                                                     | -1.22 | 0.715 | -1.19 | 0.329 | -1.06 | 0.525 | -2.37 | 0.124 | -1.46 |
| 1448337_at   | 2410003P15Rik      | RIKEN cDNA 2410003P15 gene                                                                                                       | -1.05 | 0.717 | -1.39 | 0.13  | -1.08 | 0.576 | -1.06 | 0.532 | -1.15 |
| 1433478_at   | Parl               | presenilin associated, rhomboid-like                                                                                             | -1.24 | 0.161 | -1.21 | 0.024 | -1.04 | 0.745 | -1.53 | 0.056 | -1.25 |
| 1452256_at   | 1110002N22Rik      | RIKEN cDNA 1110002N22 gene                                                                                                       | -1.18 | 0.146 | -1.1  | 0.21  | -1.19 | 0.238 | -1.17 | 0.253 | -1.16 |
| 1441203_at   | ---                | CDNA clone IMAGE:30543871                                                                                                        | -1.32 | 0.04  | -1.13 | 0.731 | -1.04 | 0.806 | -1.07 | 0.767 | -1.14 |

|              |                   |                                                                                  |       |       |       |       |       |       |       |       |       |
|--------------|-------------------|----------------------------------------------------------------------------------|-------|-------|-------|-------|-------|-------|-------|-------|-------|
| 1420487_at   | Nol7              | nucleolar protein 7                                                              | -1.25 | 0.473 | -1.13 | 0.628 | -1.1  | 0.508 | -1.37 | 0.26  | -1.21 |
| 1447158_at   | ---               | ---                                                                              | -1.23 | 0.547 | -1.1  | 0.69  | -1.15 | 0.407 | -1.55 | 0.506 | -1.25 |
| 1437070_at   | Cdc14b            | CDC14 cell division cycle 14 homolog B (S. cerevisiae)                           | -1.21 | 0.317 | -1.23 | 0.056 | -1.04 | 0.832 | -1.34 | 0.294 | -1.21 |
| 1456820_at   | ---               | 9 days embryo whole body cDNA, RIKEN full-length enriched library, clone:D030    | -1.09 | 0.701 | -1.04 | 0.933 | -1.4  | 0.47  | -1.19 | 0.592 | -1.18 |
| 1424001_at   | Mki67ip           | Mki67 (FHA domain) interacting nucleolar phosphoprotein                          | -1.07 | 0.733 | -1.12 | 0.123 | -1.3  | 0.096 | -1.03 | 0.761 | -1.13 |
| 1417157_at   | Actr10            | ARP10 actin-related protein 10 homolog (S. cerevisiae)                           | -1.16 | 0.093 | -1.15 | 0.245 | -1.16 | 0.102 | -1.18 | 0.375 | -1.16 |
| 1437446_at   | Rab5b             | RAB5B, member RAS oncogene family                                                | -1.06 | 0.565 | -1.07 | 0.802 | -1.38 | 0.11  | -1.3  | 0.059 | -1.2  |
| 1435557_at   | Fhod1             | formin homology 2 domain containing 1                                            | -1.42 | 0.208 | -1.06 | 0.862 | -1.05 | 0.879 | -1.14 | 0.714 | -1.17 |
| 1443677_at   | E030011O05Rik     | RIKEN cDNA E030011O05 gene                                                       | -1.35 | 0.441 | -1.02 | 0.962 | -1.14 | 0.623 | -1.42 | 0.081 | -1.23 |
| 1454705_at   | D15Erttd621e      | DNA segment, Chr 15, ERATO Doi 621, expressed                                    | -1.21 | 0.031 | -1.08 | 0.065 | -1.18 | 0.172 | -1.15 | 0.519 | -1.16 |
| 1456798_at   | 9330118A15Rik     | RIKEN cDNA 9330118A15 gene                                                       | -1.02 | 0.944 | -1.05 | 0.947 | -1.5  | 0.222 | -1.45 | 0.674 | -1.26 |
| 1425178_s_at | Shmt1             | serine hydroxymethyl transferase 1 (soluble)                                     | -1.3  | 0.093 | -1.06 | 0.725 | -1.13 | 0.487 | -1.1  | 0.358 | -1.15 |
| 1436117_at   | A830010M20Rik     | RIKEN cDNA A830010M20 gene                                                       | -1.31 | 0.006 | -1.06 | 0.082 | -1.12 | 0.382 | -1.28 | 0.524 | -1.19 |
| 1424188_at   | Rabgap1           | RAB GTPase activating protein 1                                                  | -1.04 | 0.089 | -1.13 | 0.04  | -1.33 | 0.122 | -1.22 | 0.319 | -1.18 |
| 1436767_at   | Luc7l2            | LUC7-like 2 (S. cerevisiae)                                                      | -1.1  | 0.536 | -1.12 | 0.305 | -1.26 | 0.19  | -1.21 | 0.246 | -1.17 |
| 1433562_s_at | Atp5f1            | ATP synthase, H+ transporting, mitochondrial F0 complex, subunit b, isoform 1    | -1.16 | 0.267 | -1.19 | 0.071 | -1.12 | 0.121 | -1.03 | 0.745 | -1.12 |
| 1456975_at   | Taok1             | TAO kinase 1                                                                     | -1.08 | 0.837 | -1.14 | 0.638 | -1.26 | 0.307 | -1.33 | 0.265 | -1.2  |
| 1421643_at   | Zfpn1a2           | zinc finger protein, subfamily 1A, 2 (Helios)                                    | -1.38 | 0.28  | -1.02 | 0.955 | -1.12 | 0.448 | -1.57 | 0.604 | -1.27 |
| 1455418_at   | ---               | Transcribed locus                                                                | -1.04 | 0.752 | -1.05 | 0.872 | -1.47 | 0.11  | -1.29 | 0.145 | -1.21 |
| 1417663_a_at | Ndrp3             | N-myc downstream regulated gene 3                                                | -1.1  | 0.31  | -1.09 | 0.414 | -1.31 | 0.104 | -1.24 | 0.038 | -1.18 |
| 1416212_at   | Magoh             | mago-nashi homolog, proliferation-associated (Drosophila)                        | -1.14 | 0.058 | -1.13 | 0.023 | -1.2  | 0.095 | -1.16 | 0.326 | -1.16 |
| 1435295_at   | Dopey1            | dopey family member 1                                                            | -1.28 | 0.152 | -1.05 | 0.748 | -1.16 | 0.515 | -1.28 | 0.196 | -1.19 |
| 1460123_at   | Gpr1              | G protein-coupled receptor 1                                                     | -1.21 | 0.561 | -1.22 | 0.699 | -1.05 | 0.837 | -1.02 | 0.915 | -1.13 |
| 1436040_at   | 2310005L22Rik     | RIKEN cDNA 2310005L22 gene                                                       | -1.3  | 0.298 | -1.2  | 0.265 | -1.01 | 0.954 | -1.23 | 0.152 | -1.18 |
| 1442086_at   | Mta3              | Metastasis associated 3                                                          | -1.32 | 0.065 | -1.17 | 0.793 | -1.02 | 0.952 | -1.31 | 0.253 | -1.2  |
| 1444010_at   | LOC668879 /// LOC | hypothetical protein LOC668879 /// hypothetical protein LOC669500                | -1.05 | 0.853 | -1.36 | 0.413 | -1.1  | 0.315 | -1.62 | 0.144 | -1.28 |
| 1458887_at   | Tcf21             | transcription factor 21                                                          | -1.09 | 0.718 | -1.23 | 0.658 | -1.15 | 0.529 | -1.45 | 0.172 | -1.23 |
| 1428258_at   | 2010107E04Rik     | RIKEN cDNA 2010107E04 gene                                                       | -1.19 | 0.079 | -1.15 | 0.123 | -1.13 | 0.473 | -1.02 | 0.91  | -1.12 |
| 1434839_s_at | Tbl1xr1           | transducin (beta)-like 1X-linked receptor 1                                      | -1.27 | 0.103 | -1.13 | 0.221 | -1.08 | 0.496 | -1.24 | 0.371 | -1.18 |
| 1422893_at   | Sfmbt1            | Scm-like with four mbt domains 1                                                 | -1.07 | 0.589 | -1.35 | 0.032 | -1.08 | 0.61  | -1.11 | 0.644 | -1.15 |
| 1436191_at   | Arid4a            | AT rich interactive domain 4A (Rbp1 like)                                        | -1.16 | 0.338 | -1.04 | 0.746 | -1.3  | 0.138 | -1.29 | 0.354 | -1.19 |
| 1428798_s_at | 0610039J04Rik     | RIKEN cDNA 0610039J04 gene                                                       | -1.19 | 0.361 | -1.16 | 0.438 | -1.12 | 0.497 | -1.17 | 0.376 | -1.16 |
| 1418983_at   | Inadl             | InaD-like (Drosophila)                                                           | -1.05 | 0.76  | -1.37 | 0.153 | -1.09 | 0.626 | -1.86 | 0.052 | -1.34 |
| 1452342_at   | Apbb2             | amyloid beta (A4) precursor protein-binding, family B, member 2                  | -1.04 | 0.705 | -1    | 0.986 | -1.55 | 0.082 | -2.02 | 0.036 | -1.4  |
| 1416057_at   | Ndufb11           | NADH dehydrogenase (ubiquinone) 1 beta subcomplex, 11                            | -1.15 | 0.296 | -1.24 | 0.104 | -1.09 | 0.427 | -1    | 0.956 | -1.12 |
| 1433641_at   | Smad5             | MAD homolog 5 (Drosophila)                                                       | -1.04 | 0.111 | -1.05 | 0.541 | -1.46 | 0.03  | -1.25 | 0.039 | -1.2  |
| 1449446_at   | Ccdc59            | coiled-coil domain containing 59                                                 | -1.16 | 0.349 | -1.16 | 0.177 | -1.14 | 0.407 | -1.3  | 0.241 | -1.19 |
| 1435161_at   | D5Erttd135e       | DNA segment, Chr 5, ERATO Doi 135, expressed                                     | -1.08 | 0.68  | -1.24 | 0.202 | -1.15 | 0.394 | -1.03 | 0.751 | -1.13 |
| 1434181_at   | Plekhc1           | pleckstrin homology domain containing, family C (with FERM domain) member 1      | -1.05 | 0.415 | -1.19 | 0.577 | -1.23 | 0.343 | -1.77 | 0.209 | -1.31 |
| 1418495_at   | Zc3h8             | zinc finger CCCH type containing 8                                               | -1.45 | 0.043 | -1.06 | 0.818 | -1.03 | 0.852 | -1.39 | 0.111 | -1.23 |
| 1436128_at   | Plekha8           | pleckstrin homology domain containing, family A (phosphoinositide binding specif | -1.05 | 0.783 | -1.07 | 0.621 | -1.4  | 0.18  | -1.03 | 0.928 | -1.14 |
| 1422486_a_at | Smad4             | MAD homolog 4 (Drosophila)                                                       | -1.04 | 0.752 | -1.21 | 0.002 | -1.24 | 0.014 | -2.01 | 0.057 | -1.37 |
| 1426879_at   | 1190005F20Rik     | RIKEN cDNA 1190005F20 gene                                                       | -1.06 | 0.394 | -1.28 | 0.095 | -1.14 | 0.458 | -1.44 | 0.023 | -1.23 |
| 1417733_at   | Rnf146            | ring finger protein 146                                                          | -1.11 | 0.436 | -1.09 | 0.099 | -1.27 | 0.014 | -1.27 | 0.053 | -1.19 |
| 1419914_s_at | D10Erttd438e      | DNA segment, Chr 10, ERATO Doi 438, expressed                                    | -1.13 | 0.525 | -1.1  | 0.197 | -1.23 | 0.12  | -1.2  | 0.2   | -1.17 |
| 1433784_at   | AI265322          | expressed sequence AI265322                                                      | -1.09 | 0.161 | -1.1  | 0.397 | -1.29 | 0.092 | -1.19 | 0.346 | -1.17 |
| 1452113_a_at | Rab23             | RAB23, member RAS oncogene family                                                | -1.3  | 0.241 | -1.18 | 0.436 | -1.01 | 0.934 | -1.01 | 0.903 | -1.13 |
| 1454574_at   | C430049A07Rik     | RIKEN cDNA C430049A07 gene                                                       | -1.47 | 0.635 | -1.06 | 0.927 | -1.02 | 0.883 | -1.19 | 0.64  | -1.18 |
| 1427416_x_at | LOC674944         | similar to dual specificity phosphatase 7                                        | -1.17 | 0.572 | -1.12 | 0.692 | -1.16 | 0.458 | -1.48 | 0.244 | -1.24 |
| 1429504_at   | Rnpc3             | RNA-binding region (RNP1, RRM) containing 3                                      | -1.3  | 0.218 | -1.1  | 0.693 | -1.08 | 0.8   | -1.32 | 0.259 | -1.2  |
| 1420999_at   | Cnot4             | CCR4-NOT transcription complex, subunit 4                                        | -1.01 | 0.739 | -1.32 | 0.075 | -1.17 | 0.157 | -1.08 | 0.277 | -1.14 |
| 1435329_at   | Fbxl11            | F-box and leucine-rich repeat protein 11                                         | -1.11 | 0.464 | -1.37 | 0.07  | -1.03 | 0.9   | -1.23 | 0.162 | -1.19 |
| 1452633_s_at | LOC637741         | hypothetical protein LOC637741                                                   | -1.19 | 0.258 | -1.05 | 0.833 | -1.24 | 0.272 | -1.23 | 0.236 | -1.18 |

|              |                   |                                                                        |       |       |       |       |       |       |       |       |       |
|--------------|-------------------|------------------------------------------------------------------------|-------|-------|-------|-------|-------|-------|-------|-------|-------|
| 1452309_at   | Cgnl1 /// LOC6774 | cingulin-like 1 /// similar to cingulin-like 1 isoform 1               | -1.09 | 0.137 | -1.03 | 0.782 | -1.39 | 0.109 | -1.22 | 0.385 | -1.18 |
| 1448020_at   | Rap1a             | RAS-related protein-1a                                                 | -1.2  | 0.107 | -1.07 | 0.575 | -1.2  | 0.233 | -1.1  | 0.703 | -1.14 |
| 1437987_at   | ---               | ---                                                                    | -1.09 | 0.47  | -1.14 | 0.748 | -1.23 | 0.315 | -1.67 | 0.097 | -1.28 |
| 1454880_s_at | Bmf               | Bcl2 modifying factor                                                  | -1.19 | 0.497 | -1.27 | 0.322 | -1.03 | 0.899 | -2    | 0.136 | -1.37 |
| 1434468_at   | Otd4              | OTU domain containing 4                                                | -1.11 | 0.544 | -1.12 | 0.229 | -1.22 | 0.029 | -1.27 | 0.296 | -1.18 |
| 1435927_at   | Dennd3            | DENN/MADD domain containing 3                                          | -1.28 | 0.006 | -1    | 0.997 | -1.21 | 0.16  | -2.07 | 0.082 | -1.39 |
| 1419454_x_at | Pias2             | protein inhibitor of activated STAT 2                                  | -1.18 | 0.341 | -1.08 | 0.634 | -1.21 | 0.059 | -1.02 | 0.909 | -1.12 |
| 1452627_at   | Senp6             | SUMO/sentrin specific peptidase 6                                      | -1.08 | 0.576 | -1.09 | 0.377 | -1.32 | 0.078 | -1.19 | 0.26  | -1.17 |
| 1443760_at   | Dock1             | Dedicator of cyto-kinesis 1                                            | -1.24 | 0.729 | -1.08 | 0.827 | -1.15 | 0.734 | -2.01 | 0.202 | -1.37 |
| 1418016_at   | Pum2              | pumilio 2 (Drosophila)                                                 | -1.16 | 0.054 | -1    | 0.97  | -1.34 | 0.086 | -1.15 | 0.175 | -1.16 |
| 1435470_at   | LOC547150         | similar to p47 protein isoform a                                       | -1.35 | 0.034 | -1.01 | 0.977 | -1.15 | 0.25  | -1.2  | 0.487 | -1.18 |
| 1448753_at   | Srp9              | signal recognition particle 9                                          | -1.12 | 0.342 | -1.03 | 0.518 | -1.34 | 0.121 | -1.38 | 0.196 | -1.22 |
| 1423715_a_at | Nedd8             | neural precursor cell expressed, developmentally down-regulated gene 8 | -1.07 | 0.627 | -1.14 | 0.001 | -1.25 | 0.021 | -1.36 | 0.213 | -1.21 |
| 1439278_at   | Zbtb20            | zinc finger and BTB domain containing 20                               | -1.26 | 0.317 | -1    | 0.95  | -1.23 | 0.392 | -1.12 | 0.782 | -1.15 |
| 1428631_a_at | Uqcrc2            | ubiquinol cytochrome c reductase core protein 2                        | -1.18 | 0.017 | -1.29 | 0.079 | -1.02 | 0.901 | -1.2  | 0.289 | -1.17 |
| 1433527_at   | Ireb2             | iron responsive element binding protein 2                              | -1.17 | 0.367 | -1.05 | 0.354 | -1.26 | 0.075 | -1.13 | 0.496 | -1.15 |
| 1422925_s_at | Acot3             | acyl-CoA thioesterase 3                                                | -1.21 | 0.583 | -1.22 | 0.788 | -1.04 | 0.827 | -1.11 | 0.833 | -1.15 |
| 1435966_x_at | Mrp13             | mitochondrial ribosomal protein L13                                    | -1.13 | 0.51  | -1.08 | 0.642 | -1.27 | 0.066 | -1.17 | 0.437 | -1.16 |
| 1459677_at   | ---               | ---                                                                    | -1.17 | 0.67  | -1.03 | 0.892 | -1.29 | 0.246 | -1.39 | 0.246 | -1.22 |
| 1420374_at   | Foxj2             | forkhead box J2                                                        | -1.09 | 0.188 | -1.06 | 0.783 | -1.33 | 0.059 | -1.3  | 0.146 | -1.2  |
| 1423868_at   | Txnrd3            | thioredoxin reductase 3                                                | -1.07 | 0.591 | -1.23 | 0.086 | -1.17 | 0.417 | -1.47 | 0.54  | -1.23 |
| 1422068_at   | Pou3f1            | POU domain, class 3, transcription factor 1                            | -1.09 | 0.481 | -1.1  | 0.822 | -1.29 | 0.29  | -1.38 | 0.558 | -1.21 |
| 1455911_x_at | Ndufb11           | NADH dehydrogenase (ubiquinone) 1 beta subcomplex, 11                  | -1.07 | 0.294 | -1.14 | 0.152 | -1.26 | 0.036 | -1.19 | 0.259 | -1.17 |
| 1426485_at   | Ubx2              | UBX domain containing 2                                                | -1.08 | 0.638 | -1.27 | 0.254 | -1.12 | 0.457 | -1.08 | 0.78  | -1.14 |
| 1447919_x_at | Ndufab1           | NADH dehydrogenase (ubiquinone) 1, alpha/beta subcomplex, 1            | -1.07 | 0.52  | -1.39 | 0.07  | -1.05 | 0.655 | -1.27 | 0.435 | -1.2  |
| 1438069_a_at | Rbm5              | RNA binding motif protein 5                                            | -1.06 | 0.863 | -1.04 | 0.803 | -1.43 | 0.273 | -1.1  | 0.702 | -1.16 |
| 1434397_at   | Zdhhc17           | zinc finger, DHHC domain containing 17                                 | -1.08 | 0.254 | -1.05 | 0.476 | -1.37 | 0.034 | -1.32 | 0.429 | -1.21 |
| 1442995_at   | Ndst1             | N-deacetylase/N-sulfotransferase (heparan glucosaminy) 1               | -1.23 | 0.088 | -1.11 | 0.617 | -1.12 | 0.719 | -1.4  | 0.278 | -1.22 |
| 1436681_x_at | 0610009D07Rik     | RIKEN cDNA 0610009D07 gene                                             | -1.44 | 0.069 | -1.01 | 0.957 | -1.08 | 0.634 | -1.02 | 0.801 | -1.14 |
| 1455574_at   | Smg7              | Smg-7 homolog, nonsense mediated mRNA decay factor (C. elegans)        | -1.13 | 0.652 | -1.01 | 0.97  | -1.37 | 0.087 | -1.09 | 0.526 | -1.15 |
| 1436122_at   | Zfp667            | zinc finger protein 667                                                | -1.15 | 0.442 | -1.14 | 0.622 | -1.16 | 0.26  | -1.34 | 0.129 | -1.2  |
| 1425134_a_at | Pigx              | phosphatidylinositol glycan anchor biosynthesis, class X               | -1.11 | 0.369 | -1.2  | 0.109 | -1.14 | 0.365 | -1.66 | 0.046 | -1.28 |
| 1434125_at   | Utp15             | UTP15, U3 small nucleolar ribonucleoprotein, homolog (yeast)           | -1.07 | 0.444 | -1.24 | 0.016 | -1.15 | 0.367 | -1.07 | 0.719 | -1.13 |
| 1450505_a_at | 1810015C04Rik     | RIKEN cDNA 1810015C04 gene                                             | -1.2  | 0.565 | -1.15 | 0.364 | -1.11 | 0.657 | -1.86 | 0.136 | -1.33 |
| 1453524_at   | 5530401D11Rik     | RIKEN cDNA 5530401D11 gene                                             | -1.15 | 0.52  | -1.09 | 0.806 | -1.22 | 0.164 | -1.46 | 0.217 | -1.23 |
| 1459836_x_at | Sf3b2             | splicing factor 3b, subunit 2                                          | -1.21 | 0.815 | -1.04 | 0.915 | -1.22 | 0.022 | -1.24 | 0.438 | -1.18 |
| 1423273_at   | Polg              | polymerase (DNA directed), gamma                                       | -1.16 | 0.542 | -1.12 | 0.498 | -1.17 | 0.01  | -1.34 | 0.004 | -1.2  |
| 1455554_at   | A830039N20Rik     | RIKEN cDNA A830039N20 gene                                             | -1.15 | 0.705 | -1.25 | 0.491 | -1.06 | 0.86  | -1.5  | 0.446 | -1.24 |
| 1434994_at   | Dedd              | death effector domain-containing                                       | -1.13 | 0.332 | -1.21 | 0.213 | -1.12 | 0.661 | -1.11 | 0.575 | -1.14 |
| 1428877_at   | Srp72             | signal recognition particle 72                                         | -1.14 | 0.33  | -1.2  | 0.004 | -1.11 | 0.137 | -1.05 | 0.53  | -1.13 |
| 1418244_at   | Nat5              | N-acetyltransferase 5 (ARD1 homolog, S. cerevisiae)                    | -1.19 | 0.042 | -1.06 | 0.46  | -1.21 | 0.178 | -1.01 | 0.792 | -1.12 |
| 1427342_at   | Fastkd1           | FAST kinase domains 1                                                  | -1.17 | 0.32  | -1.14 | 0.455 | -1.14 | 0.415 | -1.27 | 0.267 | -1.18 |
| 1457681_at   | 2610301F02Rik     | RIKEN cDNA 2610301F02 gene                                             | -1.04 | 0.908 | -1.29 | 0.11  | -1.15 | 0.439 | -1.01 | 0.873 | -1.12 |
| 1418520_at   | Tgoln1            | trans-golgi network protein                                            | -1.02 | 0.822 | -1.45 | 0.018 | -1.07 | 0.791 | -1.06 | 0.784 | -1.15 |
| 1456343_at   | Slc35f1           | solute carrier family 35, member F1                                    | -1.19 | 0.493 | -1.07 | 0.872 | -1.2  | 0.433 | -1.36 | 0.351 | -1.2  |
| 1435280_at   | AI452195          | expressed sequence AI452195                                            | -1.07 | 0.848 | -1.05 | 0.853 | -1.38 | 0.046 | -1.23 | 0.329 | -1.18 |
| 1441491_at   | A330068G13Rik     | RIKEN cDNA A330068G13 gene                                             | -1.06 | 0.865 | -1.09 | 0.854 | -1.34 | 0.435 | -1.29 | 0.185 | -1.2  |
| 1430251_at   | D330022H12Rik     | RIKEN cDNA D330022H12 gene                                             | -1.01 | 0.846 | -1.05 | 0.9   | -1.49 | 0.089 | -1.08 | 0.894 | -1.16 |
| 1438501_at   | Rps17             | Ribosomal protein S17                                                  | -1.17 | 0.029 | -1.24 | 0.509 | -1.06 | 0.804 | -1.53 | 0.045 | -1.25 |
| 1434604_at   | Eif5b             | eukaryotic translation initiation factor 5B                            | -1.16 | 0.452 | -1.07 | 0.444 | -1.23 | 0.182 | -1.16 | 0.259 | -1.16 |
| 1444057_at   | ---               | Transcribed locus                                                      | -1.28 | 0.131 | -1.09 | 0.142 | -1.1  | 0.704 | -1.32 | 0.163 | -1.2  |
| 1460303_at   | Nr3c1             | nuclear receptor subfamily 3, group C, member 1                        | -1.09 | 0.6   | -1.03 | 0.687 | -1.38 | 0.103 | -1.23 | 0.375 | -1.18 |
| 1436256_at   | Grpel2            | GrpE-like 2, mitochondrial                                             | -1.08 | 0.531 | -1.21 | 0.452 | -1.17 | 0.446 | -1.28 | 0.162 | -1.18 |

|              |                       |                                                                                      |       |       |       |       |       |       |       |       |       |
|--------------|-----------------------|--------------------------------------------------------------------------------------|-------|-------|-------|-------|-------|-------|-------|-------|-------|
| 1428360_x_at | Ndufa7                | NADH dehydrogenase (ubiquinone) 1 alpha subcomplex, 7 (B14.5a)                       | -1.09 | 0.19  | -1.16 | 0.291 | -1.2  | 0.098 | -1.12 | 0.341 | -1.14 |
| 1439780_at   | Rpl7l1                | ribosomal protein L7-like 1                                                          | -1.08 | 0.649 | -1.14 | 0.217 | -1.24 | 0.22  | -1.26 | 0.133 | -1.18 |
| 1434126_at   | 4930402H24Rik         | RIKEN cDNA 4930402H24 gene                                                           | -1.25 | 0.429 | -1.2  | 0.221 | -1.02 | 0.937 | -1.25 | 0.542 | -1.18 |
| 1417674_s_at | Golga4                | golgi autoantigen, golgin subfamily a, 4                                             | -1.15 | 0.266 | -1.17 | 0.148 | -1.13 | 0.261 | -1.12 | 0.404 | -1.14 |
| 1422475_a_at | Rps3a                 | ribosomal protein S3a                                                                | -1.11 | 0.156 | -1.05 | 0.202 | -1.32 | 0.001 | -1.36 | 0.024 | -1.21 |
| 1433502_s_at | Tsr1                  | TSR1, 20S rRNA accumulation, homolog (yeast)                                         | -1.03 | 0.884 | -1.17 | 0.421 | -1.28 | 0.062 | -1.38 | 0.533 | -1.21 |
| 1447936_at   | 2410006H16Rik         | RIKEN cDNA 2410006H16 gene                                                           | -1.07 | 0.591 | -1.26 | 0.111 | -1.13 | 0.66  | -2.45 | 0.034 | -1.48 |
| 1431972_a_at | Gcap14                | granule cell antiserum positive 14                                                   | -1.09 | 0.761 | -1.3  | 0.361 | -1.08 | 0.746 | -1.64 | 0.175 | -1.28 |
| 1458979_at   | ---                   | ---                                                                                  | -1.04 | 0.968 | -1.41 | 0.22  | -1.06 | 0.901 | -1.5  | 0.497 | -1.25 |
| 1460096_at   | Lamp1                 | Lysosomal membrane glycoprotein 1                                                    | -1.1  | 0.387 | -1.08 | 0.355 | -1.29 | 0.261 | -1.04 | 0.895 | -1.13 |
| 1449371_at   | Harsl                 | histidyl-tRNA synthetase-like                                                        | -1.35 | 0.171 | -1.07 | 0.595 | -1.07 | 0.775 | -1.21 | 0.183 | -1.18 |
| 1418118_at   | Slc22a1               | solute carrier family 22 (organic cation transporter), member 1                      | -1.18 | 0.33  | -1.26 | 0.002 | -1.03 | 0.861 | -1.39 | 0.283 | -1.22 |
| 1424455_at   | Gprasp1               | G protein-coupled receptor associated sorting protein 1                              | -1.07 | 0.605 | -1.12 | 0.376 | -1.27 | 0.178 | -1.39 | 0.322 | -1.21 |
| 1433895_at   | Tmem127               | transmembrane protein 127                                                            | -1.05 | 0.825 | -1.13 | 0.334 | -1.3  | 0.222 | -1.41 | 0.066 | -1.22 |
| 1438560_x_at | Cct4                  | chaperonin subunit 4 (delta)                                                         | -1.2  | 0.326 | -1.03 | 0.82  | -1.24 | 0.072 | -1.22 | 0.078 | -1.17 |
| 1419244_a_at | Rab14                 | RAB14, member RAS oncogene family                                                    | -1.06 | 0.621 | -1.21 | 0.2   | -1.19 | 0.266 | -1.62 | 0.085 | -1.27 |
| 1428309_s_at | Pdrg1                 | p53 and DNA damage regulated 1                                                       | -1.02 | 0.806 | -1.2  | 0.385 | -1.25 | 0.19  | -1.86 | 0.084 | -1.33 |
| 1427078_at   | Snx19                 | sorting nexin 19                                                                     | -1.15 | 0.387 | -1.26 | 0.096 | -1.05 | 0.652 | -1.13 | 0.387 | -1.15 |
| 1451324_s_at | Fytd1                 | forty-two-three domain containing 1                                                  | -1.28 | 0.424 | -1.08 | 0.437 | -1.1  | 0.068 | -1.39 | 0.152 | -1.21 |
| 1454781_x_at | Commdd9               | COMM domain containing 9                                                             | -1.05 | 0.375 | -1.09 | 0.435 | -1.36 | 0.267 | -1.11 | 0.541 | -1.15 |
| 1457011_at   | ---                   | Transcribed locus                                                                    | -1.15 | 0.771 | -1.18 | 0.492 | -1.12 | 0.778 | -3.13 | 0.072 | -1.64 |
| 1429666_at   | Kctd16                | potassium channel tetramerisation domain containing 16                               | -1.16 | 0.771 | -1.09 | 0.812 | -1.2  | 0.576 | -1.01 | 0.963 | -1.11 |
| 1417847_at   | Ulk2                  | Unc-51 like kinase 2 (C. elegans)                                                    | -1.06 | 0.752 | -1.29 | 0.007 | -1.12 | 0.362 | -1.14 | 0.609 | -1.15 |
| 1427997_at   | 1110007M04Rik         | RIKEN cDNA 1110007M04 gene                                                           | -1.06 | 0.778 | -1.34 | 0.035 | -1.08 | 0.347 | -1.03 | 0.879 | -1.13 |
| 1444403_at   | Cbfa2t2h              | Core-binding factor, runt domain, alpha subunit 2, translocated to, 2 homolog (hu)   | -1.15 | 0.725 | -1.15 | 0.396 | -1.14 | 0.681 | -1.31 | 0.218 | -1.19 |
| 1452901_at   | Creb1                 | cAMP responsive element binding protein 1                                            | -1.04 | 0.815 | -1.06 | 0.353 | -1.4  | 0.018 | -1.36 | 0.24  | -1.22 |
| 1428633_at   | Twistnb /// LOC627    | TWIST neighbor /// similar to TWIST neighbor /// similar to TWIST neighbor           | -1.18 | 0.31  | -1.03 | 0.935 | -1.26 | 0.228 | -1.23 | 0.375 | -1.17 |
| 1441139_at   | B330003H21            | hypothetical protein B330003H21                                                      | -1.45 | 0.227 | -1.03 | 0.92  | -1.05 | 0.841 | -1.09 | 0.74  | -1.15 |
| 1440332_at   | Cdv3                  | carnitine deficiency-associated gene expressed in ventricle 3                        | -1.01 | 0.907 | -1.13 | 0.386 | -1.36 | 0.138 | -1.32 | 0.396 | -1.2  |
| 1436636_at   | ---                   | ---                                                                                  | -1.03 | 0.806 | -1.37 | 0.068 | -1.1  | 0.682 | -1.07 | 0.679 | -1.14 |
| 1422490_at   | Bnip2                 | BCL2/adenovirus E1B interacting protein 1, NIP2                                      | -1.1  | 0.287 | -1.02 | 0.81  | -1.37 | 0.032 | -1.32 | 0.141 | -1.21 |
| 1456758_at   | 9930017N22Rik         | RIKEN cDNA 9930017N22 gene                                                           | -1.05 | 0.199 | -1.14 | 0.215 | -1.26 | 0.167 | -1.46 | 0.095 | -1.23 |
| 1436924_x_at | Ero1l /// Rpl31 /// L | ERO1-like (S. cerevisiae) /// ribosomal protein L31 /// similar to ribosomal protein | -1.1  | 0.186 | -1.07 | 0.449 | -1.3  | 0.003 | -1.31 | 0     | -1.19 |
| 1424637_s_at | 2610204L23Rik         | RIKEN cDNA 2610204L23 gene                                                           | -1.03 | 0.919 | -1.08 | 0.254 | -1.39 | 0.043 | -1.1  | 0.741 | -1.15 |
| 1453741_x_at | Angel2                | angel homolog 2 (Drosophila)                                                         | -1.16 | 0.7   | -1.1  | 0.758 | -1.19 | 0.714 | -2.14 | 0.111 | -1.4  |
| 1416669_s_at | Naca                  | nascent polypeptide-associated complex alpha polypeptide                             | -1.07 | 0.258 | -1.22 | 0.131 | -1.16 | 0.098 | -1.32 | 0.038 | -1.19 |
| 1451399_at   | Pnkd                  | paroxysmal nonkinesinogenic dyskinesia                                               | -1.03 | 0.785 | -1.2  | 0.096 | -1.22 | 0.134 | -1.34 | 0.23  | -1.2  |
| 1415734_at   | Rab7                  | RAB7, member RAS oncogene family                                                     | -1.15 | 0.052 | -1.09 | 0.014 | -1.21 | 0.186 | -1.28 | 0.293 | -1.18 |
| 1437100_x_at | Pim3                  | proviral integration site 3                                                          | -1.11 | 0.64  | -1.32 | 0.289 | -1.04 | 0.765 | -1.2  | 0.194 | -1.17 |
| 1438025_at   | Mtrf1l                | mitochondrial translational release factor 1-like                                    | -1.11 | 0.082 | -1.12 | 0.459 | -1.21 | 0.239 | -1.01 | 0.96  | -1.11 |
| 1456633_at   | Trpm3                 | transient receptor potential cation channel, subfamily M, member 3                   | -1.08 | 0.729 | -1.3  | 0.591 | -1.08 | 0.775 | -1.48 | 0.227 | -1.24 |
| 1454859_a_at | Rpl23                 | ribosomal protein L23                                                                | -1.08 | 0.476 | -1.06 | 0.646 | -1.35 | 0.001 | -1.38 | 0.026 | -1.21 |
| 1442886_at   | Tra2a                 | transformer 2 alpha homolog (Drosophila)                                             | -1.09 | 0.689 | -1.06 | 0.726 | -1.32 | 0.19  | -1.17 | 0.474 | -1.16 |
| 1451570_a_at | 6720467C03Rik         | RIKEN cDNA 6720467C03 gene                                                           | -1.34 | 0.032 | -1.06 | 0.43  | -1.08 | 0.427 | -1.07 | 0.385 | -1.14 |
| 1423142_a_at | Gtpbp4                | GTP binding protein 4                                                                | -1.26 | 0.516 | -1.11 | 0.433 | -1.08 | 0.569 | -1.32 | 0.166 | -1.19 |
| 1451113_a_at | Ik                    | IK cytokine                                                                          | -1.15 | 0.362 | -1.03 | 0.254 | -1.28 | 0.048 | -1.32 | 0.254 | -1.2  |
| 1456018_at   | AL022779              | expressed sequence AL022779                                                          | -1.15 | 0.218 | -1.15 | 0.116 | -1.14 | 0.216 | -1.14 | 0.227 | -1.14 |
| 1448909_a_at | Mrpl39                | mitochondrial ribosomal protein L39                                                  | -1.03 | 0.85  | -1.35 | 0.104 | -1.1  | 0.383 | -1.37 | 0.1   | -1.21 |
| 1441069_at   | Zdhhc23               | zinc finger, DHHC domain containing 23                                               | -1.15 | 0.603 | -1.2  | 0.8   | -1.09 | 0.698 | -1.28 | 0.385 | -1.18 |
| 1443199_at   | Lrch3                 | Leucine-rich repeats and calponin homology (CH) domain containing 3                  | -1.14 | 0.555 | -1.02 | 0.949 | -1.32 | 0.247 | -1.01 | 0.973 | -1.12 |
| 1416577_a_at | Rbx1                  | ring-box 1                                                                           | -1.11 | 0.495 | -1.1  | 0.052 | -1.23 | 0.262 | -1.02 | 0.841 | -1.12 |
| 1452594_at   | Dusp11                | dual specificity phosphatase 11 (RNA/RNP complex 1-interacting)                      | -1.1  | 0.738 | -1.05 | 0.661 | -1.32 | 0.098 | -1.76 | 0.025 | -1.31 |
| 1437375_at   | ---                   | 0 day neonate thymus cDNA, RIKEN full-length enriched library, clone:A430010E        | -1.13 | 0.686 | -1.15 | 0.645 | -1.16 | 0.307 | -1.32 | 0.358 | -1.19 |

|              |                   |                                                                                       |       |       |       |       |       |       |       |       |       |
|--------------|-------------------|---------------------------------------------------------------------------------------|-------|-------|-------|-------|-------|-------|-------|-------|-------|
| 1419805_s_at | Ggps1             | geranylgeranyl diphosphate synthase 1                                                 | -1.2  | 0.003 | -1.11 | 0.48  | -1.13 | 0.303 | -1.56 | 0.022 | -1.25 |
| 1430123_a_at | Akr1a4            | aldo-keto reductase family 1, member A4 (aldehyde reductase)                          | -1.22 | 0.053 | -1.13 | 0.576 | -1.09 | 0.16  | -1.16 | 0.212 | -1.15 |
| 1434681_at   | 4932441K18Rik     | RIKEN cDNA 4932441K18 gene                                                            | -1.28 | 0.169 | -1.02 | 0.878 | -1.17 | 0.359 | -1.16 | 0.54  | -1.16 |
| 1434793_at   | Wdr78             | WD repeat domain 78                                                                   | -1.25 | 0.263 | -1.21 | 0.572 | -1.01 | 0.968 | -1.19 | 0.579 | -1.16 |
| 1448050_s_at | Map4k4            | mitogen-activated protein kinase kinase kinase kinase 4                               | -1.25 | 0.561 | -1.13 | 0.838 | -1.07 | 0.36  | -1.94 | 0.023 | -1.35 |
| 1454568_at   | 6030460B20Rik     | RIKEN cDNA 6030460B20 gene                                                            | -1.14 | 0.703 | -1.13 | 0.739 | -1.17 | 0.277 | -1.47 | 0.01  | -1.23 |
| 1449929_at   | Dynlt3            | dynein light chain Tctex-type 3                                                       | -1.07 | 0.375 | -1.06 | 0.127 | -1.35 | 0.029 | -1.17 | 0.37  | -1.16 |
| 1450084_s_at | Ivns1abp          | influenza virus NS1A binding protein                                                  | -1.19 | 0.052 | -1.11 | 0.603 | -1.14 | 0.402 | -1.24 | 0.438 | -1.17 |
| 1428033_at   | LOC245174         | hypothetical protein LOC245174                                                        | -1.08 | 0.55  | -1.23 | 0.654 | -1.14 | 0.447 | -1.17 | 0.5   | -1.15 |
| 1443074_at   | ---               | ---                                                                                   | -1.09 | 0.075 | -1.32 | 0.444 | -1.06 | 0.768 | -1.36 | 0.626 | -1.21 |
| 1451494_at   | Wac               | WW domain containing adaptor with coiled-coil                                         | -1.05 | 0.436 | -1.07 | 0.327 | -1.37 | 0.016 | -1.33 | 0.052 | -1.21 |
| 1437413_x_at | Rps29 /// LOC6299 | ribosomal protein S29 /// similar to 40S ribosomal protein S29 /// similar to 40S rib | -1.15 | 0.011 | -1.03 | 0.78  | -1.29 | 0.009 | -1.25 | 0.025 | -1.18 |
| 1429608_at   | Adh6a             | alcohol dehydrogenase 6A (class V)                                                    | -1.13 | 0.866 | -1.19 | 0.784 | -1.12 | 0.876 | -1.81 | 0.391 | -1.31 |
| 1457537_at   | Rab1              | RAB1, member RAS oncogene family                                                      | -1.02 | 0.945 | -1.16 | 0.677 | -1.29 | 0.227 | -1.19 | 0.233 | -1.16 |
| 1455749_x_at | Ndufa7            | NADH dehydrogenase (ubiquinone) 1 alpha subcomplex, 7 (B14.5a)                        | -1.05 | 0.606 | -1.13 | 0.128 | -1.27 | 0.169 | -1.03 | 0.911 | -1.12 |
| 1428339_at   | Nudt21            | nudix (nucleoside diphosphate linked moiety X)-type motif 21                          | -1.09 | 0.537 | -1.15 | 0.161 | -1.2  | 0.247 | -1.03 | 0.881 | -1.12 |
| 1455949_at   | Atp1b1            | ATPase, Na+/K+ transporting, beta 1 polypeptide                                       | -1.28 | 0.002 | -1.14 | 0.829 | -1.04 | 0.795 | -1.01 | 0.988 | -1.12 |
| 1460543_x_at | Rpl37a            | ribosomal protein L37a                                                                | -1.11 | 0.077 | -1.04 | 0.69  | -1.33 | 0.001 | -1.32 | 0.023 | -1.2  |
| 1423898_a_at | Trip12            | thyroid hormone receptor interactor 12                                                | -1.2  | 0.265 | -1.09 | 0.141 | -1.15 | 0.304 | -1.3  | 0.06  | -1.19 |
| 1435696_s_at | 3110031B13Rik     | RIKEN cDNA 3110031B13 gene                                                            | -1.24 | 0.014 | -1.04 | 0.661 | -1.17 | 0.347 | -1.02 | 0.848 | -1.12 |
| 1426577_a_at | 1810054G18Rik     | RIKEN cDNA 1810054G18 gene                                                            | -1.15 | 0.539 | -1.12 | 0.189 | -1.16 | 0.137 | -1.28 | 0.324 | -1.18 |
| 1431202_at   | Herc3             | hect domain and RLD 3                                                                 | -1.35 | 0.346 | -1.13 | 0.838 | -1.01 | 0.979 | -1.13 | 0.483 | -1.15 |
| 1457658_x_at | Anxa4             | annexin A4                                                                            | -1.22 | 0.32  | -1.15 | 0.382 | -1.07 | 0.769 | -1.4  | 0.429 | -1.21 |
| 1455021_at   | Gabbr1            | gamma-aminobutyric acid (GABA-B) receptor, 1                                          | -1.01 | 0.901 | -1.4  | 0.322 | -1.09 | 0.682 | -1.03 | 0.948 | -1.13 |
| 1427916_at   | St7l              | suppression of tumorigenicity 7-like                                                  | -1.19 | 0.281 | -1.06 | 0.661 | -1.19 | 0.06  | -1.08 | 0.497 | -1.13 |
| 1426486_at   | Ubx2              | UBX domain containing 2                                                               | -1.13 | 0.168 | -1.1  | 0.214 | -1.21 | 0.067 | -1.06 | 0.674 | -1.13 |
| 1423874_at   | Wdr33             | WD repeat domain 33                                                                   | -1.28 | 0.199 | -1.1  | 0.684 | -1.08 | 0.538 | -1.42 | 0.45  | -1.22 |
| 1430526_a_at | Smarca2           | SWI/SNF related, matrix associated, actin dependent regulator of chromatin, subf      | -1.13 | 0.475 | -1.03 | 0.881 | -1.32 | 0.19  | -1.4  | 0.342 | -1.22 |
| 1451276_at   | E030041M21Rik     | RIKEN cDNA E030041M21 gene                                                            | -1.08 | 0.188 | -1.12 | 0.145 | -1.25 | 0.119 | -1.35 | 0.295 | -1.2  |
| 1416938_at   | Chchd1            | coiled-coil-helix-coiled-coil-helix domain containing 1                               | -1.06 | 0.124 | -1.08 | 0.087 | -1.34 | 0.01  | -1.29 | 0.324 | -1.19 |
| 1441351_at   | Ankib1            | Ankyrin repeat and IBR domain containing 1                                            | -1.28 | 0.446 | -1.02 | 0.963 | -1.17 | 0.36  | -1.56 | 0.136 | -1.26 |
| 1424488_a_at | Ppa2              | pyrophosphatase (inorganic) 2                                                         | -1.08 | 0.017 | -1.14 | 0.085 | -1.21 | 0.046 | -1.03 | 0.868 | -1.12 |
| 1453545_at   | 5730492I20Rik     | RIKEN cDNA 5730492I20 gene                                                            | -1.08 | 0.892 | -1.1  | 0.425 | -1.28 | 0.679 | -1.68 | 0.074 | -1.28 |
| 1438456_at   | H13               | histocompatibility 13                                                                 | -1    | 0.981 | -1.41 | 0.138 | -1.09 | 0.549 | -1.23 | 0.484 | -1.18 |
| 1439859_at   | 9630033F20Rik     | RIKEN cDNA 9630033F20 gene                                                            | -1.18 | 0.086 | -1.11 | 0.576 | -1.14 | 0.437 | -1.14 | 0.464 | -1.14 |
| 1436103_at   | Rab3ip            | RAB3A interacting protein                                                             | -1.07 | 0.563 | -1.16 | 0.417 | -1.2  | 0.118 | -1.9  | 0.1   | -1.34 |
| 1443496_at   | Elmod1            | ELMO domain containing 1                                                              | -1.53 | 0.104 | -1.01 | 0.985 | -1.02 | 0.955 | -1.46 | 0.58  | -1.26 |
| 1436234_at   | 4732471D19Rik     | RIKEN cDNA 4732471D19 gene                                                            | -1.12 | 0.52  | -1.36 | 0.074 | -1    | 0.98  | -1.2  | 0.475 | -1.17 |
| 1430978_at   | Rps25             | ribosomal protein S25                                                                 | -1.14 | 0.021 | -1.2  | 0.34  | -1.1  | 0.728 | -1.47 | 0.073 | -1.23 |
| 1425207_at   | BC026439          | cDNA sequence BC026439                                                                | -1.2  | 0.292 | -1.22 | 0.636 | -1.04 | 0.803 | -2.37 | 0.289 | -1.45 |
| 1437770_at   | AW557046          | expressed sequence AW557046                                                           | -1.02 | 0.489 | -1.36 | 0.545 | -1.11 | 0.8   | -1    | 0.986 | -1.12 |
| 1428503_a_at | Nkiras1           | NFKB inhibitor interacting Ras-like protein 1                                         | -1.12 | 0.381 | -1.16 | 0.099 | -1.15 | 0.399 | -1.4  | 0.17  | -1.21 |
| 1448584_at   | Rsrc1             | arginine/serine-rich coiled-coil 1                                                    | -1.08 | 0.549 | -1.03 | 0.651 | -1.37 | 0.064 | -1.31 | 0.062 | -1.2  |
| 1434919_at   | ---               | Transcribed locus                                                                     | -1.18 | 0.597 | -1.1  | 0.767 | -1.15 | 0.484 | -1.13 | 0.707 | -1.14 |
| 1457323_at   | LOC632191         | hypothetical protein LOC632191                                                        | -1.05 | 0.109 | -1.05 | 0.726 | -1.4  | 0.466 | -1.16 | 0.644 | -1.16 |
| 1444268_at   | BC004004          | cDNA sequence BC004004                                                                | -1.14 | 0.683 | -1.28 | 0.27  | -1.04 | 0.892 | -1.24 | 0.47  | -1.17 |
| 1452586_at   | Anapc13           | anaphase promoting complex subunit 13                                                 | -1.14 | 0.148 | -1.08 | 0.084 | -1.21 | 0.172 | -1.14 | 0.318 | -1.14 |
| 1419081_at   | Atg10             | autophagy-related 10 (yeast)                                                          | -1.1  | 0.469 | -1.18 | 0.319 | -1.15 | 0.039 | -1.33 | 0.23  | -1.19 |
| 1428830_at   | Atm               | ataxia telangiectasia mutated homolog (human)                                         | -1.14 | 0.201 | -1.18 | 0.093 | -1.11 | 0.636 | -1.89 | 0.143 | -1.33 |
| 1424578_at   | Arrdc1            | arrestin domain containing 1                                                          | -1.14 | 0.516 | -1.06 | 0.651 | -1.24 | 0.096 | -1.72 | 0.038 | -1.29 |
| 1433068_at   | 6330582A15Rik     | RIKEN cDNA 6330582A15 gene                                                            | -1.11 | 0.691 | -1.25 | 0.238 | -1.09 | 0.667 | -1.1  | 0.804 | -1.14 |
| 1426863_at   | RbmX              | RNA binding motif protein, X chromosome                                               | -1.16 | 0.586 | -1    | 0.964 | -1.3  | 0.385 | -1.33 | 0.37  | -1.2  |
| 1417704_a_at | Arhgap6           | Rho GTPase activating protein 6                                                       | -1.2  | 0.4   | -1.15 | 0.249 | -1.09 | 0.526 | -1.07 | 0.818 | -1.13 |

|              |                     |                                                                                      |       |       |       |       |       |       |       |       |       |
|--------------|---------------------|--------------------------------------------------------------------------------------|-------|-------|-------|-------|-------|-------|-------|-------|-------|
| 1429163_at   | Dchs1               | dachsous 1 (Drosophila)                                                              | -1.11 | 0.725 | -1.13 | 0.661 | -1.2  | 0.395 | -1.74 | 0.032 | -1.29 |
| 1434070_at   | Jag1                | jagged 1                                                                             | -1.22 | 0.056 | -1.19 | 0.541 | -1.04 | 0.769 | -1.66 | 0.103 | -1.28 |
| 1451903_at   | Kynu                | kynureninase (L-kynurenine hydrolase)                                                | -1.18 | 0.811 | -1.08 | 0.801 | -1.17 | 0.576 | -1.34 | 0.223 | -1.19 |
| 1418092_s_at | Trip10              | thyroid hormone receptor interactor 10                                               | -1.07 | 0.672 | -1.28 | 0.105 | -1.1  | 0.512 | -1.38 | 0.046 | -1.21 |
| 1419291_x_at | Gas5                | growth arrest specific 5                                                             | -1.02 | 0.715 | -1.11 | 0.426 | -1.34 | 0.158 | -1.52 | 0.008 | -1.25 |
| 1433594_at   | Commd2              | COMM domain containing 2                                                             | -1.12 | 0.535 | -1.03 | 0.552 | -1.32 | 0.168 | -1.58 | 0.164 | -1.26 |
| 1429456_a_at | Polr3e              | polymerase (RNA) III (DNA directed) polypeptide E                                    | -1.21 | 0.722 | -1.19 | 0.322 | -1.04 | 0.784 | -1.2  | 0.13  | -1.16 |
| 1451217_a_at | Immp1l              | IMP1 inner mitochondrial membrane peptidase-like (S. cerevisiae)                     | -1.06 | 0.231 | -1.27 | 0.031 | -1.12 | 0.377 | -1.17 | 0.457 | -1.15 |
| 1459630_at   | ---                 | Transcribed locus                                                                    | -1.14 | 0.658 | -1.06 | 0.8   | -1.25 | 0.218 | -1.09 | 0.52  | -1.13 |
| 1434474_at   | Abca5               | ATP-binding cassette, sub-family A (ABC1), member 5                                  | -1.09 | 0.529 | -1.06 | 0.613 | -1.31 | 0.177 | -1.5  | 0.344 | -1.24 |
| 1438673_at   | ---                 | ---                                                                                  | -1.13 | 0.588 | -1.17 | 0.068 | -1.13 | 0.087 | -1.51 | 0.133 | -1.24 |
| 1446060_at   | 9230109A22Rik       | RIKEN cDNA 9230109A22 gene                                                           | -1.2  | 0.817 | -1.06 | 0.915 | -1.18 | 0.575 | -1.38 | 0.23  | -1.2  |
| 1460572_a_at | Zfp511              | zinc finger protein 511                                                              | -1.07 | 0.763 | -1.11 | 0.571 | -1.27 | 0.315 | -1.48 | 0.034 | -1.23 |
| 1425159_at   | Golt1a              | golgi transport 1 homolog A (S. cerevisiae)                                          | -1.42 | 0.217 | -1.04 | 0.636 | -1.04 | 0.815 | -1.35 | 0.536 | -1.21 |
| 1418622_at   | Rab2                | RAB2, member RAS oncogene family                                                     | -1.1  | 0.238 | -1.1  | 0.225 | -1.24 | 0.088 | -1.13 | 0.596 | -1.14 |
| 1457086_at   | LOC434147           | hypothetical LOC434147                                                               | -1.13 | 0.509 | -1.09 | 0.788 | -1.22 | 0.622 | -1.3  | 0.597 | -1.18 |
| 1439049_at   | Dph5                | DPH5 homolog (S. cerevisiae)                                                         | -1.14 | 0.579 | -1.03 | 0.837 | -1.29 | 0.256 | -2.48 | 0.056 | -1.49 |
| 1448497_at   | Ercc3               | excision repair cross-complementing rodent repair deficiency, complementation g      | -1.04 | 0.791 | -1.22 | 0.122 | -1.19 | 0.289 | -1.18 | 0.339 | -1.16 |
| 1422561_at   | Adamts5             | a disintegrin-like and metallopeptidase (repolysin type) with thrombospondin type    | -1.05 | 0.216 | -1.42 | 0.153 | -1.03 | 0.739 | -1.39 | 0.269 | -1.22 |
| 1434410_at   | BC043118            | cDNA sequence BC043118                                                               | -1.18 | 0.49  | -1.18 | 0.153 | -1.08 | 0.643 | -1    | 0.989 | -1.11 |
| 1436175_at   | A430107N12Rik       | RIKEN cDNA A430107N12 gene                                                           | -1.09 | 0.536 | -1.02 | 0.858 | -1.36 | 0.044 | -1.43 | 0.212 | -1.23 |
| 1423876_at   | AI450540            | expressed sequence AI450540                                                          | -1.1  | 0.52  | -1.08 | 0.689 | -1.26 | 0.183 | -1.18 | 0.605 | -1.16 |
| 1416015_s_at | Abce1               | ATP-binding cassette, sub-family E (OABP), member 1                                  | -1.1  | 0.47  | -1.11 | 0.222 | -1.23 | 0.019 | -1.02 | 0.883 | -1.11 |
| 1456349_x_at | Sumo1               | SMT3 suppressor of mif two 3 homolog 1 (yeast)                                       | -1.13 | 0.435 | -1.03 | 0.805 | -1.3  | 0.007 | -1.35 | 0.107 | -1.2  |
| 1430300_at   | Sco1                | SCO cytochrome oxidase deficient homolog 1 (yeast)                                   | -1.15 | 0.386 | -1.16 | 0.292 | -1.12 | 0.257 | -1.12 | 0.469 | -1.14 |
| 1434392_at   | Usp34               | ubiquitin specific peptidase 34                                                      | -1.08 | 0.734 | -1.09 | 0.436 | -1.28 | 0.059 | -1.13 | 0.545 | -1.14 |
| 1419351_a_at | 0610007P06Rik       | RIKEN cDNA 0610007P06 gene                                                           | -1.13 | 0.041 | -1.23 | 0.204 | -1.07 | 0.639 | -1.12 | 0.41  | -1.14 |
| 1428115_a_at | Rab2b               | RAB2B, member RAS oncogene family                                                    | -1.16 | 0.397 | -1.2  | 0.522 | -1.07 | 0.586 | -1.65 | 0.152 | -1.27 |
| 1418000_a_at | Itn2b               | integral membrane protein 2B                                                         | -1.08 | 0.066 | -1.23 | 0.336 | -1.13 | 0.084 | -1.04 | 0.531 | -1.12 |
| 1435128_at   | Baiap2              | brain-specific angiogenesis inhibitor 1-associated protein 2                         | -1    | 0.994 | -1.5  | 0.249 | -1.04 | 0.913 | -1.09 | 0.761 | -1.16 |
| 1441837_at   | Chrm2               | cholinergic receptor, nicotinic, beta polypeptide 2 (neuronal)                       | -1.16 | 0.637 | -1.04 | 0.899 | -1.24 | 0.597 | -4.29 | 0.002 | -1.93 |
| 1449436_s_at | Ubb /// LOC218963   | ubiquitin B /// ubiquitin pseudogene /// gene model 1821, (NCBI) /// similar to poly | -1.08 | 0.351 | -1.15 | 0.22  | -1.2  | 0.031 | -1.11 | 0.132 | -1.14 |
| 1417340_at   | Txn12               | thioredoxin-like 2                                                                   | -1.18 | 0.123 | -1.1  | 0.1   | -1.15 | 0.142 | -1.34 | 0.26  | -1.19 |
| 1455403_at   | Manea               | mannosidase, endo-alpha                                                              | -1.23 | 0.041 | -1.09 | 0.165 | -1.11 | 0.163 | -1.04 | 0.877 | -1.12 |
| 1430575_a_at | Tpp2                | tripeptidyl peptidase II                                                             | -1.02 | 0.84  | -1.14 | 0.531 | -1.3  | 0.07  | -1.49 | 0.083 | -1.24 |
| 1428461_at   | Ppp2r5e             | protein phosphatase 2, regulatory subunit B (B56), epsilon isoform                   | -1.19 | 0.587 | -1.14 | 0.35  | -1.09 | 0.224 | -1.03 | 0.774 | -1.12 |
| 1452970_at   | Zmym2               | zinc finger, MYM-type 2                                                              | -1.17 | 0.16  | -1.09 | 0.337 | -1.16 | 0.134 | -1.2  | 0.089 | -1.16 |
| 1446313_at   | Zfp30               | zinc finger protein 30                                                               | -1.05 | 0.707 | -1.35 | 0.513 | -1.07 | 0.87  | -1.71 | 0.183 | -1.3  |
| 1428898_at   | Mon1a               | MON1 homolog A (yeast)                                                               | -1.1  | 0.657 | -1.17 | 0.298 | -1.16 | 0.203 | -1.2  | 0.298 | -1.16 |
| 1443262_at   | Mrps14              | mitochondrial ribosomal protein S14                                                  | -1.18 | 0.196 | -1.22 | 0.23  | -1.04 | 0.827 | -1.65 | 0.206 | -1.27 |
| 1434568_at   | ---                 | Transcribed locus                                                                    | -1.01 | 0.924 | -1.13 | 0.643 | -1.32 | 0.003 | -1.21 | 0.509 | -1.17 |
| 1460448_s_at | Ttc14               | tetratricopeptide repeat domain 14                                                   | -1.06 | 0.85  | -1.18 | 0.365 | -1.2  | 0.361 | -1.23 | 0.091 | -1.17 |
| 1439788_at   | Ccdc111             | coiled-coil domain containing 111                                                    | -1.31 | 0.404 | -1.12 | 0.193 | -1.03 | 0.904 | -1.2  | 0.2   | -1.16 |
| 1416472_at   | Syap1               | synapse associated protein 1                                                         | -1.1  | 0.05  | -1.12 | 0.211 | -1.22 | 0.077 | -1.08 | 0.708 | -1.13 |
| 1454955_at   | Ipo7                | importin 7                                                                           | -1.13 | 0.515 | -1.18 | 0.21  | -1.11 | 0.263 | -1.06 | 0.829 | -1.12 |
| 1454874_at   | Btbd7               | BTB (POZ) domain containing 7                                                        | -1.14 | 0.075 | -1.1  | 0.548 | -1.18 | 0.132 | -1.21 | 0.323 | -1.16 |
| 1427913_at   | Rwdd1               | RWD domain containing 1                                                              | -1.07 | 0.56  | -1.09 | 0.272 | -1.29 | 0.048 | -1.3  | 0.113 | -1.19 |
| 1430287_s_at | Hemk1               | HemK methyltransferase family member 1                                               | -1.09 | 0.758 | -1.13 | 0.453 | -1.21 | 0.524 | -1.33 | 0.355 | -1.19 |
| 1424604_s_at | Sumf1               | sulfatase modifying factor 1                                                         | -1.04 | 0.742 | -1.1  | 0.375 | -1.32 | 0.085 | -1.11 | 0.667 | -1.14 |
| 1455742_x_at | Morf4l1 /// A730098 | mortality factor 4 like 1 /// RIKEN cDNA A730098P11 gene /// similar to mortality f  | -1.08 | 0.057 | -1.07 | 0.08  | -1.3  | 0.001 | -1.18 | 0.034 | -1.16 |
| 1428172_at   | Prpf39              | PRP39 pre-mRNA processing factor 39 homolog (yeast)                                  | -1.03 | 0.725 | -1.12 | 0.633 | -1.31 | 0.147 | -1.45 | 0.314 | -1.23 |
| 1453520_at   | Ttc21b              | tetratricopeptide repeat domain 21B                                                  | -1.02 | 0.987 | -1.09 | 0.918 | -1.37 | 0.258 | -2.47 | 0.099 | -1.49 |
| 1437489_x_at | Sdhb                | succinate dehydrogenase complex, subunit D, integral membrane protein                | -1.3  | 0.086 | -1.04 | 0.753 | -1.11 | 0.388 | -1.16 | 0.328 | -1.15 |

|              |                   |                                                                                       |       |       |       |       |       |       |       |       |       |
|--------------|-------------------|---------------------------------------------------------------------------------------|-------|-------|-------|-------|-------|-------|-------|-------|-------|
| 1437993_x_at | Qdpr              | quininoid dihydropteridine reductase                                                  | -1.16 | 0.035 | -1.13 | 0.44  | -1.13 | 0.191 | -1.2  | 0.461 | -1.15 |
| 1441980_at   | C030007I09Rik     | RIKEN cDNA C030007I09 gene                                                            | -1.19 | 0.326 | -1.01 | 0.87  | -1.24 | 0.179 | -1.23 | 0.377 | -1.17 |
| 1457814_at   | 1110014D18Rik     | RIKEN cDNA 1110014D18 gene                                                            | -1.01 | 0.974 | -1.45 | 0.056 | -1.05 | 0.797 | -1.18 | 0.369 | -1.17 |
| 1455072_at   | Cep350            | centrosomal protein 350                                                               | -1.2  | 0.101 | -1.07 | 0.499 | -1.16 | 0.335 | -1.12 | 0.467 | -1.14 |
| 1435501_at   | C030004M05Rik     | RIKEN cDNA C030004M05 gene                                                            | -1.17 | 0.597 | -1.24 | 0.222 | -1.03 | 0.909 | -1.24 | 0.417 | -1.17 |
| 1429116_at   | Slc17a5           | solute carrier family 17 (anion/sugar transporter), member 5                          | -1.13 | 0.401 | -1.03 | 0.873 | -1.29 | 0.231 | -1.04 | 0.91  | -1.12 |
| 1458453_at   | Lmo7              | LIM domain only 7                                                                     | -1.11 | 0.164 | -1.31 | 0.651 | -1.03 | 0.883 | -1.91 | 0.044 | -1.34 |
| 1428431_at   | 2310047A01Rik     | RIKEN cDNA 2310047A01 gene                                                            | -1.17 | 0.264 | -1.02 | 0.82  | -1.26 | 0.235 | -1.43 | 0.088 | -1.22 |
| 1416943_at   | Ube2e1 /// LOC631 | ubiquitin-conjugating enzyme E2E 1, UBC4/5 homolog (yeast) /// similar to Ubiqui      | -1.26 | 0     | -1.1  | 0.021 | -1.07 | 0.407 | -1.45 | 0.088 | -1.22 |
| 1434396_a_at | Myl6 /// LOC43329 | myosin, light polypeptide 6, alkali, smooth muscle and non-muscle /// similar to m    | -1.01 | 0.922 | -1.02 | 0.881 | -1.53 | 0.003 | -1.27 | 0.05  | -1.21 |
| 1437405_a_at | Igfbp4            | insulin-like growth factor binding protein 4                                          | -1.13 | 0.39  | -1.17 | 0.382 | -1.12 | 0.599 | -1.21 | 0.41  | -1.16 |
| 1426124_a_at | Clk1              | CDC-like kinase 1                                                                     | -1.13 | 0.333 | -1.16 | 0.377 | -1.13 | 0.411 | -1.44 | 0.182 | -1.22 |
| 1438348_x_at | Ccbl1             | cysteine conjugate-beta lyase 1                                                       | -1.06 | 0.891 | -1.03 | 0.928 | -1.39 | 0.396 | -1.37 | 0.236 | -1.21 |
| 1431333_at   | Hist1h4h          | histone 1, H4h                                                                        | -1.23 | 0.806 | -1.15 | 0.471 | -1.06 | 0.814 | -1.01 | 0.977 | -1.11 |
| 1444883_at   | Tmem19            | transmembrane protein 19                                                              | -1    | 0.989 | -1.01 | 0.977 | -1.55 | 0.043 | -1.59 | 0.23  | -1.29 |
| 1434659_at   | 5830411G16Rik     | RIKEN cDNA 5830411G16 gene                                                            | -1.05 | 0.535 | -1.11 | 0.083 | -1.27 | 0.065 | -1.44 | 0.17  | -1.22 |
| 1417935_at   | Mkrn2             | makorin, ring finger protein, 2                                                       | -1.22 | 0.054 | -1.1  | 0.374 | -1.11 | 0.421 | -1.2  | 0.027 | -1.16 |
| 1452239_at   | Gt(ROSA)26Sor     | gene trap ROSA 26, Philippe Soriano                                                   | -1.25 | 0.106 | -1.06 | 0.746 | -1.13 | 0.407 | -1.28 | 0.062 | -1.18 |
| 1429988_at   | Zfp235            | zinc finger protein 235                                                               | -1.15 | 0.46  | -1.18 | 0.219 | -1.09 | 0.526 | -1    | 0.998 | -1.11 |
| 1424681_a_at | Psma5             | proteasome (prosome, macropain) subunit, alpha type 5                                 | -1.17 | 0.025 | -1.13 | 0.137 | -1.12 | 0.299 | -1.04 | 0.879 | -1.11 |
| 1434162_at   | 2700078E11Rik     | RIKEN cDNA 2700078E11 gene                                                            | -1.07 | 0.525 | -1.13 | 0.155 | -1.23 | 0.07  | -1.19 | 0.231 | -1.16 |
| 1434756_at   | 5430421B17        | hypothetical protein 5430421B17                                                       | -1.05 | 0.632 | -1.01 | 0.954 | -1.43 | 0.132 | -1.27 | 0.229 | -1.19 |
| 1456540_s_at | Mtmr6             | myotubularin related protein 6                                                        | -1.17 | 0.528 | -1.06 | 0.704 | -1.19 | 0.089 | -1.42 | 0.103 | -1.21 |
| 1459013_at   | ---               | ---                                                                                   | -1.16 | 0.61  | -1.15 | 0.78  | -1.11 | 0.823 | -1.01 | 0.989 | -1.11 |
| 1435662_at   | 2610020O08Rik     | RIKEN cDNA 2610020O08 gene                                                            | -1.08 | 0.501 | -1.1  | 0.464 | -1.25 | 0.016 | -1.28 | 0.307 | -1.18 |
| 1434520_at   | Sc5d              | sterol-C5-desaturase (fungal ERG3, delta-5-desaturase) homolog (S. cerevisiae)        | -1.08 | 0.46  | -1.17 | 0.528 | -1.17 | 0.358 | -1.27 | 0.006 | -1.17 |
| 1441119_at   | Garnl1            | GTPase activating RANGAP domain-like 1                                                | -1.21 | 0.034 | -1.06 | 0.84  | -1.15 | 0.396 | -1.09 | 0.667 | -1.13 |
| 1426598_at   | Uty               | ubiquitously transcribed tetratricopeptide repeat gene, Y chromosome                  | -1.14 | 0.861 | -1.19 | 0.838 | -1.09 | 0.723 | -1.36 | 0.639 | -1.2  |
| 1427089_at   | Ccnt2             | cyclin T2                                                                             | -1.1  | 0.564 | -1.23 | 0.155 | -1.09 | 0.59  | -1.15 | 0.551 | -1.14 |
| 1433669_at   | Akap8             | A kinase (PRKA) anchor protein 8                                                      | -1.12 | 0.229 | -1.13 | 0.413 | -1.17 | 0.205 | -1.28 | 0.228 | -1.17 |
| 1429549_at   | Col27a1           | procollagen, type XXVII, alpha 1                                                      | -1.06 | 0.607 | -1.4  | 0.307 | -1.03 | 0.952 | -1.33 | 0.158 | -1.2  |
| 1446548_at   | Gltscr1           | Glioma tumor suppressor candidate region gene 1                                       | -1.04 | 0.927 | -1.37 | 0.143 | -1.06 | 0.874 | -1.2  | 0.512 | -1.17 |
| 1425533_a_at | Stau2             | staufer (RNA binding protein) homolog 2 (Drosophila)                                  | -1.07 | 0.639 | -1.35 | 0.099 | -1.04 | 0.718 | -1.03 | 0.894 | -1.12 |
| 1446194_at   | Nr2c1             | nuclear receptor subfamily 2, group C, member 1                                       | -1.24 | 0.419 | -1.04 | 0.857 | -1.15 | 0.625 | -1.17 | 0.336 | -1.15 |
| 1447703_x_at | Zfp593            | zinc finger protein 593                                                               | -1.21 | 0.083 | -1.22 | 0.144 | -1.02 | 0.953 | -1.68 | 0.236 | -1.28 |
| 1427319_at   | A230046K03Rik     | RIKEN cDNA A230046K03 gene                                                            | -1.16 | 0.49  | -1.28 | 0.091 | -1    | 0.987 | -1.48 | 0.271 | -1.23 |
| 1415833_x_at | Rps29 /// LOC6299 | ribosomal protein S29 /// similar to 40S ribosomal protein S29 /// similar to 40S rit | -1.12 | 0.101 | -1.02 | 0.824 | -1.32 | 0.007 | -1.33 | 0.05  | -1.2  |
| 1451219_at   | Ormdl1            | ORM1-like 1 (S. cerevisiae)                                                           | -1.03 | 0.861 | -1.38 | 0.135 | -1.07 | 0.719 | -1.24 | 0.171 | -1.18 |
| 1448137_at   | Aldh7a1           | aldehyde dehydrogenase family 7, member A1                                            | -1.16 | 0.553 | -1.15 | 0.664 | -1.1  | 0.621 | -1.24 | 0.29  | -1.16 |
| 1455613_at   | E130308A19Rik     | RIKEN cDNA E130308A19 gene                                                            | -1.22 | 0.225 | -1.21 | 0.323 | -1    | 0.966 | -1.02 | 0.857 | -1.11 |
| 1439704_at   | Hdac2             | histone deacetylase 2                                                                 | -1.08 | 0.814 | -1.24 | 0.62  | -1.1  | 0.61  | -1.31 | 0.4   | -1.18 |
| 1434078_at   | D7Wsu128e         | DNA segment, Chr 7, Wayne State University 128, expressed                             | -1.09 | 0.621 | -1.15 | 0.235 | -1.18 | 0.52  | -1.11 | 0.114 | -1.13 |
| 1456871_a_at | Phf20l1           | PHD finger protein 20-like 1                                                          | -1.02 | 0.792 | -1    | 0.979 | -1.51 | 0.02  | -1.12 | 0.446 | -1.16 |
| 1417918_at   | Mrpl11            | mitochondrial ribosomal protein L11                                                   | -1.22 | 0.062 | -1.16 | 0.023 | -1.05 | 0.827 | -1.39 | 0.052 | -1.2  |
| 1434404_at   | C030011O14Rik     | RIKEN cDNA C030011O14 gene                                                            | -1.11 | 0.547 | -1.19 | 0.583 | -1.11 | 0.491 | -1.26 | 0.447 | -1.17 |
| 1456038_at   | Fbxl4             | F-box and leucine-rich repeat protein 4                                               | -1.24 | 0.146 | -1.08 | 0.154 | -1.11 | 0.385 | -1.11 | 0.724 | -1.13 |
| 1436276_at   | ---               | Transcribed locus                                                                     | -1.01 | 0.94  | -1.52 | 0.176 | -1.01 | 0.959 | -1.13 | 0.435 | -1.17 |
| 1426518_at   | Tubgcp5           | tubulin, gamma complex associated protein 5                                           | -1.12 | 0.43  | -1.16 | 0.33  | -1.13 | 0.5   | -1.26 | 0.451 | -1.17 |
| 1428152_a_at | Rpl18a            | Ribosomal protein L18A                                                                | -1.02 | 0.887 | -1.12 | 0.065 | -1.31 | 0.007 | -1.26 | 0.034 | -1.18 |
| 1437704_at   | 2900024O10Rik     | RIKEN cDNA 2900024O10 gene                                                            | -1.15 | 0.301 | -1.07 | 0.685 | -1.2  | 0.013 | -1.5  | 0.072 | -1.23 |
| 1438430_at   | Hbp1              | high mobility group box transcription factor 1                                        | -1.05 | 0.094 | -1.1  | 0.317 | -1.29 | 0.007 | -1.36 | 0.151 | -1.2  |
| 1426844_a_at | Pdcd2l            | programmed cell death 2-like                                                          | -1.29 | 0.139 | -1.14 | 0.371 | -1.02 | 0.915 | -1.78 | 0.012 | -1.3  |
| 1456429_at   | Malt1             | mucosa associated lymphoid tissue lymphoma translocation gene 1                       | -1.23 | 0.384 | -1.13 | 0.518 | -1.06 | 0.842 | -1.84 | 0.143 | -1.32 |

|              |               |                                                                          |       |       |       |       |       |       |       |       |       |
|--------------|---------------|--------------------------------------------------------------------------|-------|-------|-------|-------|-------|-------|-------|-------|-------|
| 1426216_at   | Cog6          | component of oligomeric golgi complex 6                                  | -1.22 | 0.009 | -1.21 | 0.169 | -1.01 | 0.9   | -1.07 | 0.649 | -1.13 |
| 1457606_x_at | AU015228      | expressed sequence AU015228                                              | -1.02 | 0.947 | -1.07 | 0.432 | -1.38 | 0.005 | -1.42 | 0.289 | -1.22 |
| 1442858_at   | Phr1          | Pam, highwire, rpm 1                                                     | -1.17 | 0.469 | -1.05 | 0.895 | -1.2  | 0.294 | -1.53 | 0.148 | -1.24 |
| 1459638_at   | Ptpre         | Protein tyrosine phosphatase, receptor type, E                           | -1.12 | 0.673 | -1.14 | 0.649 | -1.15 | 0.535 | -1.21 | 0.532 | -1.16 |
| 1441982_at   | Taf7          | TAF7 RNA polymerase II, TATA box binding protein (TBP)-associated factor | -1.1  | 0.549 | -1.27 | 0.516 | -1.07 | 0.871 | -1.28 | 0.749 | -1.18 |
| 1425343_at   | Hdhd3         | haloacid dehalogenase-like hydrolase domain containing 3                 | -1.24 | 0.379 | -1.04 | 0.77  | -1.15 | 0.418 | -1.27 | 0.69  | -1.17 |
| 1425523_at   | 2600011C06Rik | RIKEN cDNA 2600011C06 gene                                               | -1.2  | 0.12  | -1.15 | 0.095 | -1.06 | 0.5   | -1.03 | 0.857 | -1.11 |
| 1446239_at   | 4930444F02Rik | RIKEN cDNA 4930444F02 gene                                               | -1.09 | 0.878 | -1.18 | 0.472 | -1.15 | 0.702 | -1.27 | 0.348 | -1.17 |
| 1445796_at   | AI315068      | Expressed sequence AI315068                                              | -1.32 | 0.251 | -1.02 | 0.954 | -1.11 | 0.544 | -1.08 | 0.653 | -1.13 |
| 1447320_x_at | Rpo1-3        | RNA polymerase 1-3                                                       | -1.08 | 0.735 | -1.1  | 0.451 | -1.25 | 0.174 | -1.2  | 0.179 | -1.16 |
| 1423444_at   | Rock1         | Rho-associated coiled-coil containing protein kinase 1                   | -1.1  | 0.561 | -1.09 | 0.207 | -1.23 | 0.062 | -1.02 | 0.866 | -1.11 |
| 1431150_at   | 1700110M21Rik | RIKEN cDNA 1700110M21 gene                                               | -1.05 | 0.889 | -1.19 | 0.729 | -1.18 | 0.696 | -1.61 | 0.494 | -1.26 |
| 1422886_a_at | Clk4          | CDC like kinase 4                                                        | -1.14 | 0.434 | -1.08 | 0.606 | -1.2  | 0.443 | -1.12 | 0.633 | -1.13 |
| 1451035_a_at | Akr1a4        | aldo-keto reductase family 1, member A4 (aldehyde reductase)             | -1.24 | 0.021 | -1.09 | 0.224 | -1.09 | 0.323 | -1.19 | 0.291 | -1.15 |
| 1450047_at   | Hs6st2        | heparan sulfate 6-O-sulfotransferase 2                                   | -1.11 | 0.725 | -1.19 | 0.675 | -1.12 | 0.538 | -1.24 | 0.501 | -1.16 |
| 1448853_at   | Synj2bp       | synaptojanin 2 binding protein                                           | -1.05 | 0.616 | -1.12 | 0.15  | -1.25 | 0.135 | -1.58 | 0.068 | -1.25 |
| 1454750_a_at | BC057552      | cDNA sequence BC057552                                                   | -1.03 | 0.803 | -1.36 | 0.231 | -1.07 | 0.725 | -1.2  | 0.135 | -1.17 |
| 1437180_at   | 6530403A03Rik | RIKEN cDNA 6530403A03 gene                                               | -1.26 | 0.075 | -1    | 0.991 | -1.18 | 0.328 | -1.38 | 0.185 | -1.2  |
| 1431784_a_at | Bxdc5         | brix domain containing 5                                                 | -1.13 | 0.369 | -1.26 | 0.195 | -1.04 | 0.764 | -1.33 | 0.229 | -1.19 |
| 1423322_at   | Lin7c         | lin-7 homolog C (C. elegans)                                             | -1.09 | 0.026 | -1.15 | 0.097 | -1.17 | 0.009 | -1.16 | 0.393 | -1.14 |
| 1457219_at   | Arhgef18      | rho/rac guanine nucleotide exchange factor (GEF) 18                      | -1.04 | 0.69  | -1.21 | 0.712 | -1.16 | 0.306 | -2.12 | 0.084 | -1.39 |
| 1445609_at   | ---           | Transcribed locus                                                        | -1.02 | 0.889 | -1.15 | 0.699 | -1.26 | 0.69  | -1.63 | 0.451 | -1.27 |
| 1428777_at   | Spred1        | sprouty protein with EVH-1 domain 1, related sequence                    | -1.05 | 0.564 | -1.37 | 0.149 | -1.05 | 0.829 | -1.03 | 0.86  | -1.12 |
| 1455916_at   | AI931714      | expressed sequence AI931714                                              | -1.13 | 0.517 | -1.01 | 0.887 | -1.3  | 0.197 | -1.22 | 0.257 | -1.17 |
| 1416174_at   | Rbbp9         | retinoblastoma binding protein 9                                         | -1.1  | 0.374 | -1.06 | 0.141 | -1.26 | 0.147 | -1.54 | 0.104 | -1.24 |
| 1443693_at   | AU022332      | expressed sequence AU022332                                              | -1.08 | 0.912 | -1.28 | 0.651 | -1.07 | 0.851 | -1.03 | 0.921 | -1.12 |
| 1429107_at   | 1110059H15Rik | RIKEN cDNA 1110059H15 gene                                               | -1.12 | 0.357 | -1.19 | 0.086 | -1.1  | 0.459 | -1.02 | 0.933 | -1.11 |
| 1445905_at   | C79206        | expressed sequence C79206                                                | -1.3  | 0.693 | -1.04 | 0.928 | -1.1  | 0.77  | -1.04 | 0.935 | -1.12 |
| 1422485_at   | Smad4         | MAD homolog 4 (Drosophila)                                               | -1.11 | 0.057 | -1.19 | 0.121 | -1.12 | 0.451 | -1.75 | 0.152 | -1.29 |
| 1429193_at   | Ankib1        | ankyrin repeat and IBR domain containing 1                               | -1.15 | 0.144 | -1.1  | 0.39  | -1.16 | 0.313 | -1.3  | 0.076 | -1.18 |
| 1423756_s_at | Igfbp4        | insulin-like growth factor binding protein 4                             | -1.21 | 0.453 | -1.16 | 0.392 | -1.05 | 0.87  | -1.29 | 0.441 | -1.18 |
| 1439100_s_at | ---           | ---                                                                      | -1.02 | 0.962 | -1.11 | 0.796 | -1.32 | 0.105 | -2.17 | 0.432 | -1.41 |
| 1423577_at   | Ankrd32       | ankyrin repeat domain 32                                                 | -1.14 | 0.591 | -1.11 | 0.306 | -1.15 | 0.176 | -1    | 0.998 | -1.1  |
| 1448109_a_at | Rpl26         | ribosomal protein L26                                                    | -1.06 | 0.167 | -1.07 | 0.499 | -1.32 | 0.025 | -1.26 | 0.001 | -1.18 |
| 1427599_at   | Boll          | bol, boule-like (Drosophila)                                             | -1.14 | 0.749 | -1.3  | 0.416 | -1    | 0.993 | -1.1  | 0.729 | -1.14 |
| 1451231_a_at | Cul2          | cullin 2                                                                 | -1.1  | 0.405 | -1.14 | 0.195 | -1.17 | 0.033 | -1.02 | 0.879 | -1.11 |
| 1433457_s_at | Grsf1         | G-rich RNA sequence binding factor 1                                     | -1.1  | 0.405 | -1.22 | 0.102 | -1.09 | 0.585 | -1.04 | 0.851 | -1.11 |
| 1430028_at   | 2210018M11Rik | RIKEN cDNA 2210018M11 gene                                               | -1.01 | 0.966 | -1.35 | 0.239 | -1.1  | 0.121 | -1.05 | 0.603 | -1.13 |
| 1434935_at   | LOC637741     | hypothetical protein LOC637741                                           | -1.12 | 0.237 | -1.1  | 0.099 | -1.18 | 0.183 | -1.72 | 0.037 | -1.28 |
| 1417974_at   | Kpna4         | karyopherin (importin) alpha 4                                           | -1.07 | 0.662 | -1.06 | 0.598 | -1.31 | 0.053 | -1.46 | 0.131 | -1.22 |
| 1446868_at   | Hcfc1         | host cell factor C1                                                      | -1.12 | 0.477 | -1.17 | 0.721 | -1.11 | 0.731 | -1.97 | 0.249 | -1.35 |
| 1452039_a_at | Bap1          | Brca1 associated protein 1                                               | -1.13 | 0.322 | -1.05 | 0.713 | -1.24 | 0.087 | -1.15 | 0.097 | -1.14 |
| 1428007_at   | Krtap13-1     | keratin associated protein 13-1                                          | -1.09 | 0.893 | -1.2  | 0.617 | -1.11 | 0.768 | -1.07 | 0.846 | -1.12 |
| 1422266_at   | Mycs          | myc-like oncogene, s-myc protein                                         | -1.23 | 0.704 | -1.08 | 0.883 | -1.11 | 0.771 | -1.57 | 0.08  | -1.24 |
| 1423450_a_at | Hs3st1        | heparan sulfate (glucosamine) 3-O-sulfotransferase 1                     | -1.23 | 0.422 | -1.05 | 0.908 | -1.14 | 0.279 | -2.76 | 0.048 | -1.54 |
| 1417670_at   | Timm44        | translocase of inner mitochondrial membrane 44                           | -1.16 | 0.405 | -1.2  | 0.205 | -1.06 | 0.149 | -1.06 | 0.706 | -1.12 |
| 1442161_at   | Igfbp1        | immunoglobulin (CD79A) binding protein 1                                 | -1.21 | 0.672 | -1.21 | 0.218 | -1.01 | 0.987 | -1.26 | 0.329 | -1.17 |
| 1445443_at   | ---           | ---                                                                      | -1.05 | 0.527 | -1.05 | 0.843 | -1.35 | 0.147 | -1.11 | 0.553 | -1.14 |
| 1456109_a_at | Mrps15        | mitochondrial ribosomal protein S15                                      | -1.07 | 0.499 | -1.18 | 0.014 | -1.16 | 0.232 | -1.39 | 0.059 | -1.2  |
| 1416270_at   | Polr2g        | polymerase (RNA) II (DNA directed) polypeptide G                         | -1.18 | 0.051 | -1.11 | 0.055 | -1.11 | 0.142 | -1.31 | 0.064 | -1.18 |
| 1425972_a_at | Zfx           | zinc finger protein X-linked                                             | -1.08 | 0.386 | -1    | 0.982 | -1.38 | 0.074 | -1.24 | 0.249 | -1.18 |
| 1423757_x_at | Igfbp4        | insulin-like growth factor binding protein 4                             | -1.13 | 0.759 | -1.2  | 0.401 | -1.08 | 0.684 | -1.24 | 0.45  | -1.16 |
| 1426457_at   | Slmap         | sarcolemma associated protein                                            | -1.09 | 0.595 | -1.13 | 0.07  | -1.19 | 0.12  | -1.09 | 0.589 | -1.13 |

|              |                        |                                                                                      |       |       |       |       |       |       |       |       |       |
|--------------|------------------------|--------------------------------------------------------------------------------------|-------|-------|-------|-------|-------|-------|-------|-------|-------|
| 1428911_at   | Ttl4                   | tubulin tyrosine ligase-like family, member 4                                        | -1.15 | 0.601 | -1.18 | 0.188 | -1.08 | 0.581 | -1.2  | 0.341 | -1.15 |
| 1436219_at   | 4933403F05Rik          | RIKEN cDNA 4933403F05 gene                                                           | -1.17 | 0.421 | -1.02 | 0.897 | -1.23 | 0.054 | -1.01 | 0.925 | -1.11 |
| 1436165_at   | Luc7l2                 | LUC7-like 2 (S. cerevisiae)                                                          | -1.11 | 0.031 | -1.06 | 0.459 | -1.26 | 0.15  | -1.03 | 0.867 | -1.11 |
| 1433781_a_at | Cldn12                 | claudin 12                                                                           | -1    | 0.97  | -1.22 | 0.163 | -1.21 | 0.126 | -1.37 | 0.42  | -1.2  |
| 1456600_a_at | Rnf7                   | ring finger protein 7                                                                | -1.07 | 0.659 | -1.01 | 0.939 | -1.38 | 0.02  | -1.1  | 0.706 | -1.14 |
| 1446508_at   | ---                    | ---                                                                                  | -1.07 | 0.553 | -1.08 | 0.749 | -1.28 | 0.446 | -1.01 | 0.937 | -1.11 |
| 1431507_a_at | Synj2bp /// 181002     | (synaptojanin 2 binding protein /// RIKEN cDNA 181002G14 gene                        | -1.18 | 0.382 | -1.22 | 0.143 | -1.03 | 0.757 | -1.29 | 0.488 | -1.18 |
| 1434476_at   | Crtc1                  | CREB regulated transcription coactivator 1                                           | -1.19 | 0.246 | -1.04 | 0.652 | -1.19 | 0.1   | -1.22 | 0.417 | -1.16 |
| 1423195_at   | Hiat1                  | hippocampus abundant gene transcript 1                                               | -1.21 | 0.243 | -1.1  | 0.42  | -1.09 | 0.259 | -1.33 | 0.204 | -1.18 |
| 1424311_at   | 0710008K08Rik          | RIKEN cDNA 0710008K08 gene                                                           | -1.13 | 0.498 | -1.1  | 0.105 | -1.17 | 0.533 | -1.56 | 0.094 | -1.24 |
| 1424800_at   | Enah                   | enabled homolog (Drosophila)                                                         | -1.04 | 0.855 | -1.15 | 0.752 | -1.23 | 0.169 | -1.35 | 0.247 | -1.19 |
| 1449099_at   | Lrba                   | LPS-responsive beige-like anchor                                                     | -1.03 | 0.802 | -1.33 | 0.015 | -1.08 | 0.399 | -1.16 | 0.028 | -1.15 |
| 1424517_at   | Ccdc12                 | coiled-coil domain containing 12                                                     | -1.25 | 0.269 | -1.16 | 0.036 | -1.02 | 0.935 | -1.43 | 0.094 | -1.21 |
| 1418185_at   | 4733401H18Rik          | RIKEN cDNA 4733401H18 gene                                                           | -1.16 | 0.066 | -1.2  | 0.002 | -1.06 | 0.736 | -1.09 | 0.671 | -1.13 |
| 1425063_at   | ---                    | ---                                                                                  | -1.42 | 0.643 | -1.04 | 0.859 | -1.02 | 0.972 | -2.92 | 0.098 | -1.6  |
| 1456722_at   | Chrdl1                 | chordin-like 1                                                                       | -1.32 | 0.198 | -1.05 | 0.9   | -1.07 | 0.835 | -1.58 | 0.319 | -1.26 |
| 1427894_at   | Vasn                   | vasorin                                                                              | -1.12 | 0.563 | -1.17 | 0.313 | -1.11 | 0.674 | -1.48 | 0.335 | -1.22 |
| 1439722_at   | ---                    | ---                                                                                  | -1.22 | 0.377 | -1.02 | 0.924 | -1.18 | 0.358 | -1.59 | 0.086 | -1.25 |
| 1417594_at   | Gkap1                  | G kinase anchoring protein 1                                                         | -1.08 | 0.69  | -1.08 | 0.681 | -1.27 | 0.246 | -1.12 | 0.765 | -1.13 |
| 1416217_a_at | Rpl37a                 | ribosomal protein L37a                                                               | -1.01 | 0.953 | -1.14 | 0.202 | -1.29 | 0.001 | -1.25 | 0.027 | -1.17 |
| 1434757_at   | Cbfa2t2h               | core-binding factor, runt domain, alpha subunit 2, translocated to, 2 homolog (hur   | -1.11 | 0.384 | -1.02 | 0.91  | -1.31 | 0.089 | -1.13 | 0.113 | -1.14 |
| 1443385_at   | A930012N16Rik          | RIKEN cDNA A930012N16 gene                                                           | -1.09 | 0.916 | -1.23 | 0.582 | -1.09 | 0.865 | -1.08 | 0.914 | -1.12 |
| 1455596_a_at | BC029214               | cDNA sequence BC029214                                                               | -1.03 | 0.81  | -1.32 | 0.108 | -1.09 | 0.374 | -1.24 | 0.313 | -1.17 |
| 1416765_s_at | Magmas                 | mitochondria-associated protein involved in granulocyte-macrophage colony-stim       | -1.03 | 0.375 | -1.13 | 0.226 | -1.26 | 0.157 | -1.2  | 0.237 | -1.15 |
| 1453794_at   | Fer1l4                 | fer-1-like 4 (C. elegans)                                                            | -1.14 | 0.826 | -1.01 | 0.975 | -1.28 | 0.416 | -1.09 | 0.652 | -1.13 |
| 1448866_at   | Senp3                  | SUMO/sentrin specific peptidase 3                                                    | -1.24 | 0.213 | -1    | 0.994 | -1.19 | 0.032 | -1.21 | 0.248 | -1.16 |
| 1441440_at   | Atg4c                  | autophagy-related 4C (yeast)                                                         | -1.06 | 0.627 | -1.01 | 0.966 | -1.4  | 0.006 | -1.57 | 0.097 | -1.26 |
| 1456403_at   | Pag1                   | phosphoprotein associated with glycosphingolipid microdomains 1                      | -1.17 | 0.643 | -1.24 | 0.654 | -1.02 | 0.951 | -1.39 | 0.28  | -1.2  |
| 1442567_at   | Zbtb24                 | zinc finger and BTB domain containing 24                                             | -1.25 | 0.542 | -1.13 | 0.758 | -1.04 | 0.811 | -1.02 | 0.944 | -1.11 |
| 1440150_at   | Tgm3                   | Transglutaminase 3, E polypeptide                                                    | -1.17 | 0.63  | -1.11 | 0.777 | -1.12 | 0.803 | -1.28 | 0.737 | -1.17 |
| 1436555_at   | Slc7a2                 | solute carrier family 7 (cationic amino acid transporter, y+ system), member 2       | -1.1  | 0.089 | -1.2  | 0.464 | -1.11 | 0.608 | -1.11 | 0.703 | -1.13 |
| 1456201_at   | 4632427E13Rik          | RIKEN cDNA 4632427E13 gene                                                           | -1.04 | 0.865 | -1.07 | 0.403 | -1.32 | 0.161 | -1.04 | 0.674 | -1.12 |
| 1429707_at   | Plaa                   | phospholipase A2, activating protein                                                 | -1.18 | 0.223 | -1.14 | 0.211 | -1.08 | 0.576 | -1.06 | 0.294 | -1.12 |
| 1437977_at   | Sgtb                   | Small glutamine-rich tetratricopeptide repeat (TPR)-containing, beta                 | -1.23 | 0.29  | -1.14 | 0.506 | -1.05 | 0.852 | -1.04 | 0.852 | -1.11 |
| 1422130_at   | Nptx1                  | neuronal pentraxin 1                                                                 | -1.16 | 0.421 | -1.08 | 0.615 | -1.16 | 0.27  | -1.67 | 0.091 | -1.27 |
| 1450730_at   | Hs2st1                 | heparan sulfate 2-O-sulfotransferase 1                                               | -1.08 | 0.462 | -1.1  | 0.571 | -1.23 | 0.45  | -1.08 | 0.801 | -1.12 |
| 1436056_at   | Kif13b                 | kinesin family member 13B                                                            | -1.13 | 0.266 | -1.12 | 0.267 | -1.16 | 0.328 | -1.03 | 0.874 | -1.11 |
| 1431515_at   | 4932414N04Rik          | RIKEN cDNA 4932414N04 gene                                                           | -1.04 | 0.947 | -1.41 | 0.488 | -1.02 | 0.964 | -1.83 | 0.337 | -1.32 |
| 1418503_at   | Hspa9a                 | heat shock protein 9A                                                                | -1.11 | 0.373 | -1.15 | 0.206 | -1.14 | 0.169 | -1.31 | 0.267 | -1.18 |
| 1435250_at   | Ints8                  | integrator complex subunit 8                                                         | -1.09 | 0.593 | -1.13 | 0.282 | -1.18 | 0.268 | -1.13 | 0.572 | -1.13 |
| 1452770_at   | Vkorc1                 | vitamin K epoxide reductase complex, subunit 1                                       | -1.04 | 0.625 | -1.15 | 0.004 | -1.22 | 0.03  | -1.12 | 0.387 | -1.13 |
| 1436008_at   | Tpd52                  | Tumor protein D52                                                                    | -1.19 | 0.354 | -1.12 | 0.697 | -1.09 | 0.766 | -1.21 | 0.132 | -1.15 |
| 1436848_x_at | Impa1                  | inositol (myo)-1(or 4)-monophosphatase 1                                             | -1.07 | 0.625 | -1.17 | 0.251 | -1.16 | 0.108 | -1.06 | 0.374 | -1.12 |
| 1452580_a_at | Mrpl21                 | mitochondrial ribosomal protein L21                                                  | -1.16 | 0.008 | -1.18 | 0.018 | -1.06 | 0.63  | -1.26 | 0.205 | -1.17 |
| 1438330_at   | BC065397               | cDNA sequence BC065397                                                               | -1.19 | 0.375 | -1.15 | 0.307 | -1.06 | 0.812 | -1.17 | 0.554 | -1.14 |
| 1417510_at   | Vps4a                  | vacuolar protein sorting 4a (yeast)                                                  | -1.05 | 0.573 | -1.06 | 0.2   | -1.31 | 0.046 | -1.28 | 0.201 | -1.18 |
| 1417538_at   | Slc35a1                | solute carrier family 35 (CMP-sialic acid transporter), member 1                     | -1.06 | 0.503 | -1.04 | 0.718 | -1.34 | 0.009 | -1.05 | 0.778 | -1.12 |
| 1460008_x_at | Ero1l /// Rpl31 /// LC | ERO1-like (S. cerevisiae) /// ribosomal protein L31 /// similar to ribosomal protein | -1.13 | 0.025 | -1.02 | 0.73  | -1.26 | 0.021 | -1.27 | 0.001 | -1.17 |
| 1428829_at   | 6820401H01Rik          | RIKEN cDNA 6820401H01 gene                                                           | -1.1  | 0.624 | -1.21 | 0.11  | -1.1  | 0.361 | -1.55 | 0.214 | -1.24 |
| 1445729_at   | Dnaj1                  | DnaJ (Hsp40) homolog, subfamily A, member 1                                          | -1.27 | 0.072 | -1.15 | 0.316 | -1    | 0.975 | -1.05 | 0.838 | -1.12 |
| 1445396_at   | Lrch1                  | leucine-rich repeats and calponin homology (CH) domain containing 1                  | -1.12 | 0.792 | -1.03 | 0.934 | -1.26 | 0.427 | -1.61 | 0.287 | -1.26 |
| 1437508_at   | Sp4                    | trans-acting transcription factor 4                                                  | -1.08 | 0.766 | -1.05 | 0.858 | -1.3  | 0.067 | -1.01 | 0.963 | -1.11 |
| 1434921_at   | Nr2e1                  | nuclear receptor subfamily 2, group E, member 1                                      | -1.11 | 0.887 | -1.08 | 0.838 | -1.21 | 0.772 | -1.06 | 0.815 | -1.11 |

|              |               |                                                                                   |       |       |       |       |       |       |       |       |       |
|--------------|---------------|-----------------------------------------------------------------------------------|-------|-------|-------|-------|-------|-------|-------|-------|-------|
| 1443830_x_at | Rnf103        | ring finger protein 103                                                           | -1.08 | 0.708 | -1.1  | 0.392 | -1.22 | 0.245 | -1.17 | 0.748 | -1.14 |
| 1429017_at   | Smcr8         | Smith-Magenis syndrome chromosome region, candidate 8 homolog (human)             | -1.07 | 0.634 | -1.2  | 0.245 | -1.13 | 0.404 | -1.19 | 0.119 | -1.15 |
| 1428421_a_at | 2700085E05Rik | RIKEN cDNA 2700085E05 gene                                                        | -1.1  | 0.018 | -1.23 | 0.099 | -1.07 | 0.557 | -1.05 | 0.686 | -1.11 |
| 1442937_at   | C77190        | expressed sequence C77190                                                         | -1.12 | 0.889 | -1.18 | 0.779 | -1.1  | 0.836 | -1.17 | 0.844 | -1.14 |
| 1456358_at   | Etv3          | Ets variant gene 3                                                                | -1.06 | 0.625 | -1.16 | 0.377 | -1.18 | 0.624 | -1.93 | 0.102 | -1.33 |
| 1420855_at   | Eln           | elastin                                                                           | -1.06 | 0.514 | -1.08 | 0.534 | -1.27 | 0.138 | -1.39 | 0.291 | -1.2  |
| 1423654_a_at | Rnf4          | ring finger protein 4                                                             | -1.17 | 0.489 | -1.09 | 0.02  | -1.14 | 0.152 | -1.07 | 0.372 | -1.12 |
| 1445181_at   | Eml5          | echinoderm microtubule associated protein like 5                                  | -1.08 | 0.659 | -1.02 | 0.95  | -1.34 | 0.009 | -1.15 | 0.15  | -1.15 |
| 1450543_at   | Myo1h         | myosin 1H                                                                         | -1.19 | 0.807 | -1.11 | 0.818 | -1.09 | 0.731 | -1.25 | 0.471 | -1.16 |
| 1455420_at   | Rad23b        | RAD23b homolog (S. cerevisiae)                                                    | -1.2  | 0.071 | -1.02 | 0.912 | -1.19 | 0.247 | -1.25 | 0.305 | -1.17 |
| 1446410_at   | Cept1         | Choline/ethanolaminephosphotransferase 1                                          | -1.05 | 0.594 | -1.07 | 0.777 | -1.31 | 0.123 | -1.57 | 0.083 | -1.25 |
| 1450859_s_at | Ube2d3        | ubiquitin-conjugating enzyme E2D 3 (UBC4/5 homolog, yeast)                        | -1.1  | 0.504 | -1.06 | 0.563 | -1.25 | 0.364 | -1.31 | 0.072 | -1.18 |
| 1419174_at   | 2410004B18Rik | RIKEN cDNA 2410004B18 gene                                                        | -1.09 | 0.093 | -1.11 | 0.242 | -1.2  | 0.021 | -1.27 | 0.028 | -1.17 |
| 1434274_at   | Phr1          | pam, highwire, rpm 1                                                              | -1.15 | 0.194 | -1.04 | 0.76  | -1.22 | 0.134 | -1.63 | 0.09  | -1.26 |
| 1439271_x_at | Ik            | IK cytokine                                                                       | -1.12 | 0.482 | -1.09 | 0.288 | -1.19 | 0.067 | -1.18 | 0.292 | -1.14 |
| 1433101_at   | 9030419F21Rik | RIKEN cDNA 9030419F21 gene                                                        | -1.19 | 0.193 | -1.05 | 0.735 | -1.16 | 0.44  | -1.29 | 0.389 | -1.17 |
| 1458095_at   | Gtl2          | GTL2, imprinted maternally expressed untranslated mRNA                            | -1.09 | 0.484 | -1.27 | 0.752 | -1.06 | 0.869 | -1.95 | 0.184 | -1.34 |
| 1431951_a_at | Usp16         | ubiquitin specific peptidase 16                                                   | -1.13 | 0.585 | -1.04 | 0.682 | -1.24 | 0.109 | -1.21 | 0.216 | -1.16 |
| 1436580_at   | ---           | ---                                                                               | -1.14 | 0.327 | -1.17 | 0.627 | -1.09 | 0.393 | -1.02 | 0.959 | -1.1  |
| 1429485_a_at | Utp11l        | UTP11-like, U3 small nucleolar ribonucleoprotein, (yeast)                         | -1.13 | 0.177 | -1.07 | 0.167 | -1.2  | 0.036 | -1.21 | 0.069 | -1.15 |
| 1447333_at   | Slc11a2       | Solute carrier family 11 (proton-coupled divalent metal ion transporters), member | -1.23 | 0.695 | -1.04 | 0.94  | -1.13 | 0.805 | -1.09 | 0.876 | -1.13 |
| 1423890_x_at | Atp1b1        | ATPase, Na+/K+ transporting, beta 1 polypeptide                                   | -1.07 | 0.065 | -1.28 | 0.126 | -1.07 | 0.698 | -2.21 | 0.073 | -1.41 |
| 1423046_s_at | Ncbp2         | nuclear cap binding protein subunit 2                                             | -1.04 | 0.691 | -1.11 | 0.466 | -1.26 | 0.052 | -1.3  | 0.114 | -1.18 |
| 1424295_at   | Dppa3         | developmental pluripotency-associated 3                                           | -1.35 | 0.614 | -1    | 0.994 | -1.09 | 0.808 | -1.09 | 0.787 | -1.13 |
| 1427134_at   | Sfrs12        | splicing factor, arginine/serine-rich 12                                          | -1.02 | 0.883 | -1.13 | 0.317 | -1.27 | 0.019 | -1.02 | 0.937 | -1.11 |
| 1456153_at   | Ssh2          | slingshot homolog 2 (Drosophila)                                                  | -1.05 | 0.866 | -1.16 | 0.334 | -1.19 | 0.068 | -1.46 | 0.118 | -1.21 |
| 1426556_at   | Suhw4         | suppressor of hairy wing homolog 4 (Drosophila)                                   | -1.07 | 0.629 | -1.15 | 0.264 | -1.18 | 0.143 | -1.27 | 0.006 | -1.17 |
| 1417982_at   | Insig2        | insulin induced gene 2                                                            | -1.02 | 0.867 | -1.35 | 0.207 | -1.07 | 0.693 | -1.17 | 0.37  | -1.15 |
| 1425068_a_at | Tex264        | testis expressed gene 264                                                         | -1.01 | 0.931 | -1.19 | 0.272 | -1.22 | 0.249 | -1.48 | 0.185 | -1.22 |
| 1449004_at   | Mrpl46        | mitochondrial ribosomal protein L46                                               | -1.06 | 0.577 | -1.11 | 0.284 | -1.25 | 0.047 | -1.07 | 0.738 | -1.12 |
| 1454851_at   | Nr2c2         | nuclear receptor subfamily 2, group C, member 2                                   | -1.1  | 0.219 | -1.06 | 0.598 | -1.24 | 0.282 | -1.1  | 0.65  | -1.13 |
| 1452721_a_at | Ccdc53        | coiled-coil domain containing 53                                                  | -1.12 | 0.366 | -1.2  | 0.18  | -1.07 | 0.568 | -1.46 | 0.077 | -1.22 |
| 1454602_s_at | Cnot2         | CCR4-NOT transcription complex, subunit 2                                         | -1.06 | 0.188 | -1.17 | 0.07  | -1.17 | 0.268 | -1.12 | 0.315 | -1.13 |
| 1421881_a_at | Elavl2        | ELAV (embryonic lethal, abnormal vision, Drosophila)-like 2 (Hu antigen B)        | -1.21 | 0.808 | -1.09 | 0.858 | -1.1  | 0.73  | -1.01 | 0.971 | -1.1  |
| 1424052_at   | Thap4         | THAP domain containing 4                                                          | -1.08 | 0.008 | -1.18 | 0.51  | -1.14 | 0.4   | -1.15 | 0.047 | -1.14 |
| 1455565_at   | Bcl9          | B-cell CLL/lymphoma 9                                                             | -1.23 | 0.777 | -1.04 | 0.93  | -1.14 | 0.667 | -1.94 | 0.065 | -1.34 |
| 1460213_at   | Golga4        | golgi autoantigen, golgin subfamily a, 4                                          | -1.05 | 0.718 | -1.25 | 0.125 | -1.11 | 0.744 | -1.06 | 0.828 | -1.12 |
| 1417405_at   | Stard3        | START domain containing 3                                                         | -1.11 | 0.157 | -1.08 | 0.435 | -1.21 | 0.127 | -1.35 | 0.206 | -1.19 |
| 1444456_at   | 9030425P06Rik | RIKEN cDNA 9030425P06 gene                                                        | -1.06 | 0.661 | -1.04 | 0.761 | -1.33 | 0.149 | -1.44 | 0.146 | -1.22 |
| 1434192_at   | Zzef1         | zinc finger, ZZ-type with EF hand domain 1                                        | -1.12 | 0.3   | -1.15 | 0.297 | -1.13 | 0.462 | -1.25 | 0.305 | -1.16 |
| 1433882_at   | Cnot10        | CCR4-NOT transcription complex, subunit 10                                        | -1.12 | 0.439 | -1.09 | 0.101 | -1.18 | 0.107 | -1.04 | 0.677 | -1.11 |
| 1426840_at   | Ythdf3        | YTH domain family 3                                                               | -1.15 | 0.578 | -1.03 | 0.739 | -1.23 | 0.072 | -1.38 | 0.124 | -1.2  |
| 1419287_at   | Hspc171       | HSPC171 protein                                                                   | -1.05 | 0.041 | -1.1  | 0.176 | -1.27 | 0.139 | -1.01 | 0.925 | -1.11 |
| 1428448_a_at | Gtf3c2        | general transcription factor IIIC, polypeptide 2, beta                            | -1.19 | 0.099 | -1.13 | 0.39  | -1.07 | 0.563 | -1.08 | 0.108 | -1.12 |
| 1430293_a_at | B230118G17Rik | RIKEN cDNA B230118G17 gene                                                        | -1.16 | 0.294 | -1.12 | 0.183 | -1.11 | 0.508 | -1.11 | 0.251 | -1.12 |
| 1448589_at   | Ndufb5        | NADH dehydrogenase (ubiquinone) 1 beta subcomplex, 5                              | -1.1  | 0.158 | -1.28 | 0.043 | -1.03 | 0.788 | -1.48 | 0.144 | -1.23 |
| 1447507_at   | C80406        | expressed sequence C80406                                                         | -1.2  | 0.113 | -1.1  | 0.499 | -1.1  | 0.433 | -1.38 | 0.176 | -1.19 |
| 1416996_at   | Tbc1d8        | TBC1 domain family, member 8                                                      | -1.07 | 0.8   | -1.31 | 0.39  | -1.05 | 0.595 | -1.32 | 0.091 | -1.19 |
| 1450785_at   | Trip4         | thyroid hormone receptor interactor 4                                             | -1.12 | 0.348 | -1.15 | 0.57  | -1.12 | 0.68  | -1.19 | 0.457 | -1.14 |
| 1448483_a_at | Ndufb2        | NADH dehydrogenase (ubiquinone) 1 beta subcomplex, 2                              | -1.09 | 0.26  | -1.08 | 0.224 | -1.23 | 0.203 | -1.01 | 0.959 | -1.1  |
| 1451385_at   | 2310056P07Rik | RIKEN cDNA 2310056P07 gene                                                        | -1.1  | 0.197 | -1.12 | 0.054 | -1.17 | 0.271 | -1.32 | 0.112 | -1.18 |
| 1419111_at   | Ing2          | inhibitor of growth family, member 2                                              | -1.18 | 0.249 | -1.03 | 0.711 | -1.19 | 0.105 | -1.17 | 0.575 | -1.14 |
| 1434340_at   | ---           | ---                                                                               | -1.08 | 0.335 | -1.34 | 0.018 | -1.02 | 0.953 | -1.04 | 0.677 | -1.12 |

|              |                     |                                                                                       |       |       |       |       |       |       |       |       |       |
|--------------|---------------------|---------------------------------------------------------------------------------------|-------|-------|-------|-------|-------|-------|-------|-------|-------|
| 1435769_at   | Akap9               | A kinase (PRKA) anchor protein (yotiao) 9                                             | -1.08 | 0.506 | -1.12 | 0.106 | -1.19 | 0.023 | -1.24 | 0.447 | -1.16 |
| 1455762_at   | C33000219Rik        | RIKEN cDNA C33000219 gene                                                             | -1.1  | 0.287 | -1.13 | 0.423 | -1.16 | 0.503 | -1.31 | 0.504 | -1.18 |
| 1455189_at   | Trim33 /// 80304511 | tripartite motif protein 33 /// RIKEN cDNA 8030451N04 gene                            | -1.2  | 0.082 | -1.02 | 0.916 | -1.18 | 0.196 | -1.07 | 0.456 | -1.12 |
| 1438409_at   | Cep63               | centrosomal protein 63                                                                | -1.01 | 0.884 | -1.02 | 0.915 | -1.45 | 0.024 | -1.38 | 0.119 | -1.22 |
| 1416096_at   | AI413782            | expressed sequence AI413782                                                           | -1.19 | 0.313 | -1.05 | 0.573 | -1.16 | 0.251 | -1.19 | 0.35  | -1.15 |
| 1427519_at   | Adora2a             | adenosine A2a receptor                                                                | -1.31 | 0.411 | -1.04 | 0.92  | -1.08 | 0.719 | -1.04 | 0.928 | -1.12 |
| 1417410_s_at | Prkci               | protein kinase C, iota                                                                | -1.05 | 0.629 | -1.1  | 0.289 | -1.26 | 0.196 | -1.48 | 0.17  | -1.22 |
| 1458404_at   | Ndufb8              | NADH dehydrogenase (ubiquinone) 1 beta subcomplex 8                                   | -1.15 | 0.183 | -1.26 | 0.43  | -1.01 | 0.978 | -1.18 | 0.034 | -1.15 |
| 1447195_at   | Elp4                | Elongation protein 4 homolog (S. cerevisiae)                                          | -1.11 | 0.5   | -1    | 0.997 | -1.32 | 0.282 | -1.34 | 0.092 | -1.19 |
| 1416721_s_at | Sfrs6               | splicing factor, arginine/serine-rich 6                                               | -1    | 0.983 | -1.25 | 0.018 | -1.16 | 0.162 | -1.01 | 0.967 | -1.11 |
| 1423070_at   | Rpl21               | ribosomal protein L21                                                                 | -1.1  | 0.694 | -1.03 | 0.879 | -1.29 | 0.245 | -1.14 | 0.532 | -1.14 |
| 1424017_a_at | Hint1               | histidine triad nucleotide binding protein 1                                          | -1.11 | 0.133 | -1.13 | 0.556 | -1.15 | 0.065 | -1.18 | 0.153 | -1.14 |
| 1458202_at   | 6330500D04Rik       | RIKEN cDNA 6330500D04 gene                                                            | -1.06 | 0.885 | -1.3  | 0.195 | -1.06 | 0.844 | -2.68 | 0.038 | -1.53 |
| 1420500_at   | Dnajc1              | DnaJ (Hsp40) homolog, subfamily C, member 1                                           | -1.04 | 0.795 | -1.05 | 0.714 | -1.35 | 0.091 | -1.5  | 0.166 | -1.24 |
| 1416488_at   | Ccng2               | cyclin G2                                                                             | -1.11 | 0.667 | -1.12 | 0.512 | -1.15 | 0.255 | -1.57 | 0.084 | -1.24 |
| 1454774_at   | Zfp445              | zinc finger protein 445                                                               | -1.18 | 0.531 | -1.05 | 0.292 | -1.16 | 0.235 | -1.44 | 0.118 | -1.21 |
| 1416420_a_at | Rpl9 /// LOC637375  | ribosomal protein L9 /// similar to ribosomal protein L9                              | -1.11 | 0.082 | -1.07 | 0.281 | -1.22 | 0.003 | -1.25 | 0.003 | -1.16 |
| 1438391_x_at | Hadh2               | hydroxyacyl-Coenzyme A dehydrogenase type II                                          | -1.04 | 0.698 | -1.16 | 0.175 | -1.2  | 0.052 | -1.1  | 0.708 | -1.13 |
| 1424025_at   | BC013529            | cDNA sequence BC013529                                                                | -1.17 | 0.014 | -1.11 | 0.491 | -1.1  | 0.251 | -1.08 | 0.556 | -1.12 |
| 1456063_at   | ORF34               | open reading frame 34                                                                 | -1.09 | 0.338 | -1.13 | 0.519 | -1.17 | 0.316 | -1.07 | 0.837 | -1.11 |
| 1448442_a_at | Psma3               | proteasome (prosome, macropain) subunit, alpha type 3                                 | -1.04 | 0.51  | -1.16 | 0.007 | -1.19 | 0.027 | -1.19 | 0.049 | -1.15 |
| 1426924_at   | Mnab                | membrane associated DNA binding protein                                               | -1.07 | 0.8   | -1.02 | 0.813 | -1.34 | 0.023 | -1.01 | 0.824 | -1.11 |
| 1416463_at   | Gpiap1              | GPI-anchored membrane protein 1                                                       | -1.01 | 0.941 | -1.48 | 0.346 | -1    | 0.993 | -1.06 | 0.709 | -1.14 |
| 1450357_a_at | Ccr6                | chemokine (C-C motif) receptor 6                                                      | -1.08 | 0.814 | -1.32 | 0.575 | -1.02 | 0.795 | -3.17 | 0.046 | -1.65 |
| 1440020_at   | Rlf                 | Rearranged L-myc fusion sequence                                                      | -1.09 | 0.775 | -1.07 | 0.761 | -1.24 | 0.12  | -1.08 | 0.45  | -1.12 |
| 1450895_a_at | 1810020G14Rik       | RIKEN cDNA 1810020G14 gene                                                            | -1.25 | 0.062 | -1.06 | 0.406 | -1.09 | 0.519 | -1.63 | 0.202 | -1.26 |
| 1438018_at   | Hook1               | hook homolog 1 (Drosophila)                                                           | -1.08 | 0.586 | -1.1  | 0.203 | -1.22 | 0.122 | -1.86 | 0.087 | -1.31 |
| 1424251_a_at | Hnrpd1              | heterogeneous nuclear ribonucleoprotein D-like                                        | -1.07 | 0.705 | -1.25 | 0.074 | -1.08 | 0.426 | -1.11 | 0.509 | -1.13 |
| 1425018_at   | Mcts1               | malignant T cell amplified sequence 1                                                 | -1.18 | 0.007 | -1.17 | 0.041 | -1.04 | 0.669 | -1.23 | 0.25  | -1.16 |
| 1457248_x_at | Hsd17b7             | hydroxysteroid (17-beta) dehydrogenase 7                                              | -1.06 | 0.631 | -1.03 | 0.872 | -1.34 | 0.001 | -1.36 | 0.307 | -1.2  |
| 1427073_at   | Lace1               | lactation elevated 1                                                                  | -1.12 | 0.103 | -1.22 | 0.278 | -1.05 | 0.698 | -1.21 | 0.125 | -1.15 |
| 1459986_a_at | Rps17               | ribosomal protein S17                                                                 | -1.1  | 0.211 | -1.06 | 0.576 | -1.23 | 0.005 | -1.24 | 0.003 | -1.16 |
| 1432195_s_at | Ccnl2               | cyclin L2                                                                             | -1.33 | 0.003 | -1.01 | 0.913 | -1.08 | 0.545 | -1.26 | 0.226 | -1.17 |
| 1439470_at   | 2410025L10Rik       | RIKEN cDNA 2410025L10 gene                                                            | -1.19 | 0.534 | -1.06 | 0.73  | -1.14 | 0.421 | -1.15 | 0.266 | -1.14 |
| 1434406_at   | Srgap2              | SLIT-ROBO Rho GTPase activating protein 2                                             | -1.23 | 0.057 | -1.13 | 0.368 | -1.04 | 0.827 | -1.07 | 0.157 | -1.12 |
| 1428908_at   | 2600011C06Rik       | RIKEN cDNA 2600011C06 gene                                                            | -1.16 | 0.415 | -1.12 | 0.143 | -1.1  | 0.374 | -1.1  | 0.783 | -1.12 |
| 1430875_a_at | Pak1ip1             | PAK1 interacting protein 1                                                            | -1.02 | 0.896 | -1.36 | 0.043 | -1.06 | 0.68  | -1.11 | 0.732 | -1.14 |
| 1452286_at   | 5033405K12Rik       | RIKEN cDNA 5033405K12 gene                                                            | -1.13 | 0.668 | -1.19 | 0.076 | -1.06 | 0.664 | -1.16 | 0.078 | -1.14 |
| 1460182_at   | Snx4                | sorting nexin 4                                                                       | -1.09 | 0.347 | -1.04 | 0.267 | -1.27 | 0.028 | -1.33 | 0.204 | -1.18 |
| 1434009_at   | Grif1               | glucocorticoid receptor DNA binding factor 1                                          | -1.04 | 0.524 | -1.21 | 0.013 | -1.14 | 0.389 | -1.56 | 0.018 | -1.24 |
| 1437435_at   | 1700061G19Rik ///   | RIKEN cDNA 1700061G19 gene /// similar to gonadotropin-regulated long chain s         | -1.08 | 0.508 | -1.24 | 0.562 | -1.07 | 0.601 | -1.73 | 0.206 | -1.28 |
| 1454657_s_at | Mak10               | MAK10 homolog, amino-acid N-acetyltransferase subunit, (S. cerevisiae)                | -1.13 | 0.12  | -1.16 | 0.218 | -1.09 | 0.082 | -1.19 | 0.218 | -1.14 |
| 1418205_at   | ---                 | ---                                                                                   | -1.2  | 0.358 | -1.17 | 0.647 | -1.02 | 0.872 | -1.39 | 0.143 | -1.2  |
| 1453928_a_at | Ssb                 | Sjogren syndrome antigen B                                                            | -1.05 | 0.725 | -1.04 | 0.544 | -1.34 | 0.088 | -1.31 | 0.205 | -1.18 |
| 1433472_x_at | Rpl38 /// LOC62564  | ribosomal protein L38 /// similar to ribosomal protein L38 /// similar to ribosomal p | -1.11 | 0.048 | -1.02 | 0.832 | -1.28 | 0.02  | -1.29 | 0.015 | -1.18 |
| 1418150_at   | Mtmr4               | myotubularin related protein 4                                                        | -1.07 | 0.781 | -1.26 | 0.044 | -1.07 | 0.851 | -1.03 | 0.946 | -1.11 |
| 1419818_x_at | D1Ert161e           | DNA segment, Chr 1, ERATO Doi 161, expressed                                          | -1.3  | 0.288 | -1.05 | 0.674 | -1.06 | 0.684 | -1.03 | 0.893 | -1.11 |
| 1448308_at   | Ap3m1               | adaptor-related protein complex 3, mu 1 subunit                                       | -1.07 | 0.279 | -1.15 | 0.481 | -1.17 | 0.139 | -1.01 | 0.917 | -1.1  |
| 1455152_at   | AI462493            | expressed sequence AI462493                                                           | -1.02 | 0.854 | -1.15 | 0.072 | -1.22 | 0.092 | -1.5  | 0.128 | -1.22 |
| 1452749_at   | Papd1               | PAP associated domain containing 1                                                    | -1.17 | 0.049 | -1.1  | 0.267 | -1.12 | 0.348 | -1.37 | 0.009 | -1.19 |
| 1443438_at   | Ncoa1               | Nuclear receptor coactivator 1                                                        | -1.02 | 0.915 | -1.11 | 0.75  | -1.28 | 0.038 | -1.83 | 0.068 | -1.31 |
| 1449083_at   | Ccdc91              | coiled-coil domain containing 91                                                      | -1.2  | 0.014 | -1.02 | 0.92  | -1.18 | 0.155 | -1.22 | 0.41  | -1.15 |
| 1426915_at   | Dapk1               | death associated protein kinase 1                                                     | -1.15 | 0.046 | -1    | 0.999 | -1.25 | 0.014 | -1.16 | 0.486 | -1.14 |

|              |                   |                                                                                       |       |       |       |       |       |       |       |       |       |
|--------------|-------------------|---------------------------------------------------------------------------------------|-------|-------|-------|-------|-------|-------|-------|-------|-------|
| 1451283_at   | 1810073G14Rik     | RIKEN cDNA 1810073G14 gene                                                            | -1.08 | 0.169 | -1.24 | 0.017 | -1.07 | 0.647 | -1.32 | 0.003 | -1.18 |
| 1425956_a_at | Cdadc1            | cytidine and dCMP deaminase domain containing 1                                       | -1.11 | 0.636 | -1.15 | 0.045 | -1.11 | 0.336 | -1.13 | 0.364 | -1.13 |
| 1442432_x_at | Atxn7l1           | ataxin 7-like 1                                                                       | -1.13 | 0.432 | -1.22 | 0.568 | -1.04 | 0.92  | -1.12 | 0.665 | -1.13 |
| 1435247_at   | Ube1dc1           | ubiquitin-activating enzyme E1-domain containing 1                                    | -1.09 | 0.273 | -1    | 0.962 | -1.33 | 0.106 | -1.36 | 0.055 | -1.2  |
| 1450804_at   | Kif5c             | kinesin family member 5C                                                              | -1.23 | 0.049 | -1.07 | 0.853 | -1.09 | 0.811 | -1    | 0.986 | -1.1  |
| 1435347_at   | Stau1             | staufen (RNA binding protein) homolog 1 (Drosophila)                                  | -1.08 | 0.425 | -1.17 | 0.123 | -1.12 | 0.475 | -1.09 | 0.732 | -1.12 |
| 1438082_at   | 2310028N02Rik     | RIKEN cDNA 2310028N02 gene                                                            | -1.05 | 0.789 | -1.25 | 0.206 | -1.1  | 0.755 | -1.29 | 0.214 | -1.17 |
| 1453723_x_at | Ubb /// Gm1821    | ubiquitin B /// gene model 1821, (NCBI)                                               | -1.06 | 0.065 | -1.15 | 0.222 | -1.18 | 0.031 | -1.12 | 0.035 | -1.12 |
| 1444028_s_at | Dock9 /// LOC6703 | dedicator of cytokinesis 9 /// similar to Dedicator of cytokinesis protein 9 (Cdc42 g | -1.16 | 0.449 | -1.19 | 0.283 | -1.03 | 0.866 | -1.38 | 0.158 | -1.19 |
| 1445375_at   | Itsn2             | intersectin 2                                                                         | -1.09 | 0.611 | -1.04 | 0.524 | -1.27 | 0.154 | -1.48 | 0.166 | -1.22 |
| 1417402_at   | 1190017O12Rik     | RIKEN cDNA 1190017O12 gene                                                            | -1.11 | 0.669 | -1.05 | 0.453 | -1.23 | 0.229 | -1.29 | 0.262 | -1.17 |
| 1455740_at   | Hnrpa1            | heterogeneous nuclear ribonucleoprotein A1                                            | -1.16 | 0.808 | -1.09 | 0.711 | -1.12 | 0.648 | -1.34 | 0.595 | -1.18 |
| 1456467_s_at | Nlk               | nemo like kinase                                                                      | -1.15 | 0.608 | -1.06 | 0.805 | -1.18 | 0.153 | -1.47 | 0.027 | -1.21 |
| 1429418_at   | Cdc14b            | CDC14 cell division cycle 14 homolog B (S. cerevisiae)                                | -1.1  | 0.652 | -1.14 | 0.213 | -1.14 | 0.47  | -1.29 | 0.446 | -1.17 |
| 1452116_s_at | Atf2              | activating transcription factor 2                                                     | -1.07 | 0.477 | -1.08 | 0.256 | -1.23 | 0.091 | -1.01 | 0.811 | -1.1  |
| 1439973_at   | Crxos1            | Crx opposite strand transcript 1                                                      | -1.29 | 0.085 | -1.01 | 0.965 | -1.11 | 0.55  | -1.45 | 0.104 | -1.21 |
| 1417369_at   | Hsd17b4           | hydroxysteroid (17-beta) dehydrogenase 4                                              | -1.05 | 0.813 | -1.36 | 0.098 | -1.03 | 0.868 | -1.13 | 0.692 | -1.14 |
| 1443970_at   | Ntrk3             | neurotrophic tyrosine kinase, receptor, type 3                                        | -1.02 | 0.965 | -1.35 | 0.145 | -1.06 | 0.875 | -1.17 | 0.602 | -1.15 |
| 1415684_at   | Atg5              | autophagy-related 5 (yeast)                                                           | -1.12 | 0.436 | -1.06 | 0.721 | -1.21 | 0.491 | -1.08 | 0.231 | -1.12 |
| 1435099_at   | Utp14a            | UTP14, U3 small nucleolar ribonucleoprotein, homolog A (yeast)                        | -1.23 | 0.268 | -1.05 | 0.478 | -1.1  | 0.353 | -1.26 | 0.073 | -1.16 |
| 1415738_at   | Txndc12           | thioredoxin domain containing 12 (endoplasmic reticulum)                              | -1.29 | 0.076 | -1.03 | 0.701 | -1.09 | 0.596 | -1.45 | 0.101 | -1.21 |
| 1455252_at   | Tsc1              | tuberous sclerosis 1                                                                  | -1.06 | 0.251 | -1.08 | 0.561 | -1.26 | 0.175 | -1.16 | 0.013 | -1.14 |
| 1430702_at   | 5830427D03Rik     | RIKEN cDNA 5830427D03 gene                                                            | -1.08 | 0.504 | -1.01 | 0.971 | -1.34 | 0.349 | -1.35 | 0.34  | -1.19 |
| 1457559_at   | Wac               | VW domain containing adaptor with coiled-coil                                         | -1.05 | 0.746 | -1.08 | 0.219 | -1.27 | 0.116 | -1.04 | 0.755 | -1.11 |
| 1423033_at   | Stt3a             | STT3, subunit of the oligosaccharyltransferase complex, homolog A (S. cerevisiae)     | -1.13 | 0.528 | -1.13 | 0.578 | -1.12 | 0.542 | -1.12 | 0.615 | -1.12 |
| 1425554_a_at | Cdc16             | CDC16 cell division cycle 16 homolog (S. cerevisiae)                                  | -1.17 | 0.128 | -1.07 | 0.627 | -1.14 | 0.145 | -1.1  | 0.458 | -1.12 |
| 1427050_at   | 5730420B22Rik     | RIKEN cDNA 5730420B22 gene                                                            | -1.09 | 0.673 | -1.24 | 0.315 | -1.06 | 0.281 | -1.87 | 0.077 | -1.32 |
| 1420709_s_at | Dao1              | D-amino acid oxidase 1                                                                | -1.09 | 0.805 | -1.21 | 0.616 | -1.09 | 0.761 | -1.15 | 0.596 | -1.13 |
| 1450642_at   | 3110001I20Rik     | RIKEN cDNA 3110001I20 gene                                                            | -1.1  | 0.679 | -1.14 | 0.19  | -1.13 | 0.257 | -1.17 | 0.468 | -1.14 |
| 1444159_at   | Pip5k2a           | Phosphatidylinositol-4-phosphate 5-kinase, type II, alpha                             | -1.09 | 0.315 | -1.04 | 0.863 | -1.27 | 0.433 | -1.13 | 0.732 | -1.13 |
| 1428188_at   | 2610019A05Rik     | RIKEN cDNA 2610019A05 gene                                                            | -1.09 | 0.74  | -1.12 | 0.791 | -1.16 | 0.64  | -1.43 | 0.275 | -1.2  |
| 1459874_s_at | Mtmr4             | myotubularin related protein 4                                                        | -1.02 | 0.934 | -1.13 | 0.51  | -1.24 | 0.013 | -1.33 | 0.07  | -1.18 |
| 1448958_at   | lfrg15            | interferon alpha responsive gene                                                      | -1.2  | 0.205 | -1.08 | 0.729 | -1.1  | 0.676 | -1.15 | 0.57  | -1.13 |
| 1434215_at   | B230308N11Rik     | RIKEN cDNA B230308N11 gene                                                            | -1.11 | 0.281 | -1.1  | 0.387 | -1.16 | 0.1   | -1.04 | 0.402 | -1.1  |
| 1432984_at   | 1700026H06Rik     | RIKEN cDNA 1700026H06 gene                                                            | -1.09 | 0.665 | -1.07 | 0.609 | -1.23 | 0.129 | -1.14 | 0.612 | -1.13 |
| 1438993_a_at | Atp6v1d           | ATPase, H+ transporting, lysosomal V1 subunit D                                       | -1.06 | 0.711 | -1.15 | 0.1   | -1.16 | 0.1   | -1.25 | 0.083 | -1.16 |
| 1437470_at   | Pknox1            | Pbx/knotted 1 homeobox                                                                | -1.1  | 0.696 | -1.19 | 0.338 | -1.09 | 0.732 | -1.06 | 0.596 | -1.11 |
| 1456395_at   | Ppargc1a          | peroxisome proliferative activated receptor, gamma, coactivator 1 alpha               | -1.11 | 0.599 | -1.29 | 0.358 | -1.01 | 0.921 | -1.68 | 0.346 | -1.27 |
| 1451576_at   | Prkdc             | protein kinase, DNA activated, catalytic polypeptide                                  | -1.14 | 0.549 | -1.18 | 0.288 | -1.05 | 0.681 | -1.07 | 0.708 | -1.11 |
| 1426527_at   | Toe1              | target of EGR1, member 1 (nuclear)                                                    | -1.12 | 0.541 | -1.04 | 0.859 | -1.23 | 0.103 | -1.29 | 0.046 | -1.17 |
| 1454620_x_at | Rps6 /// LOC43440 | ribosomal protein S6 /// similar to 40S ribosomal protein S6 /// similar to 40S ribos | -1.01 | 0.88  | -1.09 | 0.368 | -1.31 | 0.002 | -1.32 | 0.006 | -1.18 |
| 1444031_at   | ---               | ---                                                                                   | -1.12 | 0.756 | -1.13 | 0.525 | -1.12 | 0.682 | -1.34 | 0.522 | -1.18 |
| 1433768_at   | Palld             | palladin, cytoskeletal associated protein                                             | -1.06 | 0.681 | -1.31 | 0.064 | -1.04 | 0.854 | -1.27 | 0.463 | -1.17 |
| 1460571_at   | Dicer1            | Dicer1, Dcr-1 homolog (Drosophila)                                                    | -1.08 | 0.03  | -1.1  | 0.124 | -1.2  | 0.31  | -1.54 | 0.153 | -1.23 |
| 1444858_at   | Inoc1             | INO80 complex homolog 1 (S. cerevisiae)                                               | -1.11 | 0.136 | -1.11 | 0.645 | -1.15 | 0.442 | -1.5  | 0.1   | -1.22 |
| 1420883_at   | Sln               | sarcolipin                                                                            | -1.03 | 0.896 | -1.17 | 0.665 | -1.18 | 0.669 | -1.1  | 0.84  | -1.12 |
| 1416312_at   | Rars              | arginyl-tRNA synthetase                                                               | -1.1  | 0.593 | -1.17 | 0.053 | -1.11 | 0.045 | -1.08 | 0.553 | -1.11 |
| 1448990_a_at | Myo1b             | myosin IB                                                                             | -1.13 | 0.769 | -1.18 | 0.301 | -1.07 | 0.739 | -1.75 | 0.057 | -1.28 |
| 1438051_at   | Ttc14             | tetratricopeptide repeat domain 14                                                    | -1.16 | 0.659 | -1.11 | 0.736 | -1.1  | 0.331 | -1.2  | 0.38  | -1.14 |
| 1459854_s_at | Dynl13            | dynein light chain Tctex-type 3                                                       | -1.14 | 0.374 | -1.05 | 0.608 | -1.19 | 0.032 | -1.14 | 0.57  | -1.13 |
| 1446107_at   | Stk24             | Serine/threonine kinase 24 (STE20 homolog, yeast)                                     | -1.19 | 0.621 | -1.08 | 0.578 | -1.1  | 0.755 | -1.33 | 0.247 | -1.18 |
| 1434214_at   | 0910001L09Rik     | RIKEN cDNA 0910001L09 gene                                                            | -1.06 | 0.696 | -1.14 | 0.115 | -1.18 | 0.339 | -1.52 | 0.081 | -1.22 |
| 1455434_a_at | Ktn1              | kinectin 1                                                                            | -1.1  | 0.672 | -1.16 | 0.199 | -1.11 | 0.196 | -1.47 | 0.247 | -1.21 |

|              |                    |                                                                                         |       |       |       |       |       |       |       |       |       |
|--------------|--------------------|-----------------------------------------------------------------------------------------|-------|-------|-------|-------|-------|-------|-------|-------|-------|
| 1418209_a_at | Pfn2               | profilin 2                                                                              | -1.09 | 0.303 | -1.03 | 0.921 | -1.28 | 0.202 | -1.38 | 0.237 | -1.2  |
| 1439795_at   | Gpr64              | G protein-coupled receptor 64                                                           | -1.02 | 0.974 | -1.28 | 0.695 | -1.1  | 0.605 | -1.42 | 0.371 | -1.21 |
| 1424721_at   | Mfap3              | microfibrillar-associated protein 3                                                     | -1.07 | 0.759 | -1.05 | 0.769 | -1.28 | 0.061 | -1.36 | 0.037 | -1.19 |
| 1437791_s_at | Emi5               | echinoderm microtubule associated protein like 5                                        | -1.05 | 0.786 | -1.08 | 0.713 | -1.27 | 0.246 | -1.26 | 0.121 | -1.16 |
| 1449533_at   | Tmem100            | transmembrane protein 100                                                               | -1.06 | 0.873 | -1.3  | 0.567 | -1.04 | 0.608 | -1.37 | 0.42  | -1.19 |
| 1431665_a_at | Timm8b             | translocase of inner mitochondrial membrane 8 homolog b (yeast)                         | -1.06 | 0.593 | -1.05 | 0.596 | -1.29 | 0.012 | -1.02 | 0.946 | -1.1  |
| 1459457_at   | Camk2d             | calcium/calmodulin-dependent protein kinase II, delta                                   | -1.09 | 0.254 | -1.13 | 0.648 | -1.15 | 0.543 | -1    | 0.989 | -1.09 |
| 1417791_a_at | Zfml               | zinc finger, matrin-like                                                                | -1.09 | 0.599 | -1.09 | 0.623 | -1.19 | 0.369 | -1.4  | 0.174 | -1.19 |
| 1436539_at   | Clmn               | calmin                                                                                  | -1.3  | 0.094 | -1.05 | 0.862 | -1.05 | 0.932 | -1.18 | 0.147 | -1.15 |
| 1433846_s_at | C430003P19Rik      | RIKEN cDNA C430003P19 gene                                                              | -1.15 | 0.019 | -1.04 | 0.477 | -1.19 | 0.09  | -1.31 | 0.103 | -1.17 |
| 1435011_x_at | Akr1a4             | aldo-keto reductase family 1, member A4 (aldehyde reductase)                            | -1.23 | 0.026 | -1.07 | 0.246 | -1.08 | 0.209 | -1.2  | 0.341 | -1.15 |
| 1428394_at   | Phyh1 /// Lrrc8a   | phytanoyl-CoA dioxygenase domain containing 1 /// leucine rich repeat containing        | -1.08 | 0.301 | -1.17 | 0.054 | -1.12 | 0.629 | -1.35 | 0.215 | -1.18 |
| 1457672_at   | Chd9               | chromodomain helicase DNA binding protein 9                                             | -1    | 0.972 | -1.23 | 0.126 | -1.16 | 0.237 | -1.41 | 0.23  | -1.2  |
| 1423272_at   | Polg               | polymerase (DNA directed), gamma                                                        | -1.1  | 0.236 | -1.21 | 0.011 | -1.07 | 0.727 | -1.32 | 0.011 | -1.17 |
| 1435158_at   | Rbm12b             | RNA binding motif protein 12B                                                           | -1.3  | 0.475 | -1.01 | 0.953 | -1.09 | 0.649 | -1.77 | 0.039 | -1.29 |
| 1419046_at   | Brp16              | brain protein 16                                                                        | -1.06 | 0.685 | -1.23 | 0.143 | -1.09 | 0.643 | -1.32 | 0.242 | -1.18 |
| 1455139_at   | Al851716           | expressed sequence Al851716                                                             | -1.08 | 0.69  | -1.3  | 0.294 | -1.02 | 0.823 | -1.1  | 0.647 | -1.13 |
| 1448794_s_at | Dnajc2             | DnaJ (Hsp40) homolog, subfamily C, member 2                                             | -1.02 | 0.896 | -1.18 | 0.326 | -1.18 | 0.344 | -1.12 | 0.71  | -1.13 |
| 1427407_s_at | Trip11             | thyroid hormone receptor interactor 11                                                  | -1.13 | 0.333 | -1.01 | 0.894 | -1.25 | 0.075 | -1.3  | 0.263 | -1.17 |
| 1440966_at   | 7-Mar              | membrane-associated ring finger (C3HC4) 7                                               | -1.01 | 0.966 | -1.08 | 0.659 | -1.33 | 0.129 | -1.58 | 0.131 | -1.25 |
| 1434232_a_at | 2610030H06Rik      | RIKEN cDNA 2610030H06 gene                                                              | -1.07 | 0.675 | -1.25 | 0.151 | -1.07 | 0.703 | -1.06 | 0.847 | -1.11 |
| 1448448_a_at | Chkb               | choline kinase beta                                                                     | -1.1  | 0.526 | -1.27 | 0.045 | -1.02 | 0.775 | -1.44 | 0.134 | -1.21 |
| 1424299_at   | Oma1               | OMA1 homolog, zinc metallopeptidase (S. cerevisiae)                                     | -1.13 | 0.246 | -1.1  | 0.242 | -1.14 | 0.262 | -1.39 | 0.076 | -1.19 |
| 1438418_at   | 4932432K03Rik      | RIKEN cDNA 4932432K03 gene                                                              | -1.12 | 0.086 | -1.06 | 0.797 | -1.19 | 0.345 | -1.32 | 0.307 | -1.17 |
| 1426862_at   | Aftph              | aftiphilin                                                                              | -1.12 | 0.308 | -1.08 | 0.333 | -1.17 | 0.205 | -1.07 | 0.642 | -1.11 |
| 1427881_at   | Dnttip2            | deoxynucleotidyltransferase, terminal, interacting protein 2                            | -1.08 | 0.745 | -1.19 | 0.118 | -1.11 | 0.586 | -1.21 | 0.206 | -1.15 |
| 1441229_at   | D230019N24Rik      | RIKEN cDNA D230019N24 gene                                                              | -1.03 | 0.614 | -1.32 | 0.113 | -1.06 | 0.708 | -1.59 | 0.123 | -1.25 |
| 1434952_at   | Cox4nb             | COX4 neighbor                                                                           | -1.03 | 0.853 | -1.24 | 0.426 | -1.12 | 0.585 | -1.08 | 0.884 | -1.12 |
| 1446096_at   | 2310001H17Rik      | RIKEN cDNA 2310001H17 gene                                                              | -1.14 | 0.499 | -1.19 | 0.117 | -1.04 | 0.916 | -1.43 | 0.124 | -1.2  |
| 1416616_s_at | Clpp               | caseinolytic peptidase, ATP-dependent, proteolytic subunit homolog (E. coli)            | -1.1  | 0.401 | -1.09 | 0.523 | -1.18 | 0.201 | -1.03 | 0.739 | -1.1  |
| 1434179_at   | MLI3               | myeloid/lymphoid or mixed-lineage leukemia 3                                            | -1.06 | 0.374 | -1.16 | 0.093 | -1.16 | 0.431 | -1.24 | 0.273 | -1.15 |
| 1435568_at   | AK129128           | cDNA sequence AK129128                                                                  | -1.16 | 0.275 | -1.09 | 0.483 | -1.11 | 0.334 | -1.03 | 0.848 | -1.1  |
| 1428406_s_at | Hcfc1r1            | host cell factor C1 regulator 1 (XPO1-dependent)                                        | -1.12 | 0.578 | -1.18 | 0.456 | -1.07 | 0.633 | -1.04 | 0.747 | -1.1  |
| 1423301_at   | Copb1              | coatamer protein complex, subunit beta 1                                                | -1.11 | 0.524 | -1.16 | 0.015 | -1.09 | 0.371 | -1.24 | 0.072 | -1.15 |
| 1433852_at   | C330002I19Rik      | RIKEN cDNA C330002I19 gene                                                              | -1.15 | 0.164 | -1.03 | 0.596 | -1.2  | 0.304 | -1.25 | 0.419 | -1.16 |
| 1459715_at   | 1500011J06Rik      | RIKEN cDNA 1500011J06 gene                                                              | -1.12 | 0.71  | -1.09 | 0.48  | -1.16 | 0.597 | -1.23 | 0.494 | -1.15 |
| 1434884_at   | Mtdh               | Metadherin                                                                              | -1.18 | 0.483 | -1.09 | 0.575 | -1.1  | 0.415 | -1.01 | 0.969 | -1.09 |
| 1426536_at   | Narg2              | NMDA receptor-regulated gene 2                                                          | -1.12 | 0.479 | -1.03 | 0.718 | -1.23 | 0.118 | -1.42 | 0.121 | -1.2  |
| 1445244_at   | Tm2d1              | TM2 domain containing 1                                                                 | -1.11 | 0.808 | -1.07 | 0.914 | -1.19 | 0.484 | -1.13 | 0.778 | -1.12 |
| 1426741_a_at | Fastkd2            | FAST kinase domains 2                                                                   | -1.23 | 0.352 | -1.12 | 0.137 | -1.03 | 0.411 | -1.04 | 0.47  | -1.1  |
| 1422888_at   | Rnf5               | ring finger protein 5                                                                   | -1.36 | 0.207 | -1.06 | 0.709 | -1    | 0.995 | -1.03 | 0.766 | -1.11 |
| 1428177_at   | Trappc6b /// LOC45 | trafficking protein particle complex 6B /// similar to Trafficking protein particle com | -1.18 | 0.066 | -1.17 | 0.017 | -1.03 | 0.764 | -1.03 | 0.847 | -1.1  |
| 1430678_at   | 5730457N03Rik      | RIKEN cDNA 5730457N03 gene                                                              | -1.17 | 0.843 | -1.17 | 0.604 | -1.03 | 0.945 | -2.37 | 0.284 | -1.44 |
| 1439558_at   | Zfp75              | zinc finger protein 75                                                                  | -1.23 | 0.735 | -1.08 | 0.784 | -1.06 | 0.489 | -1.2  | 0.568 | -1.14 |
| 1457787_at   | ---                | ---                                                                                     | -1.24 | 0.341 | -1.02 | 0.917 | -1.12 | 0.531 | -1.18 | 0.238 | -1.14 |
| 1456058_at   | Rbm27              | RNA binding motif protein 27                                                            | -1.02 | 0.883 | -1.02 | 0.846 | -1.38 | 0.014 | -1.12 | 0.045 | -1.14 |
| 1433778_at   | Tnks               | tankyrase, TRF1-interacting ankyrin-related ADP-ribose polymerase                       | -1.01 | 0.916 | -1.21 | 0.059 | -1.16 | 0.42  | -1    | 0.989 | -1.1  |
| 1454794_at   | Spast              | spastin                                                                                 | -1.04 | 0.77  | -1.17 | 0.234 | -1.16 | 0.152 | -1.03 | 0.609 | -1.1  |
| 1428170_at   | Zfp180             | zinc finger protein 180                                                                 | -1.02 | 0.914 | -1.11 | 0.503 | -1.27 | 0.06  | -1.06 | 0.769 | -1.11 |
| 1454116_a_at | Mterfd1            | MTERF domain containing 1                                                               | -1.19 | 0.412 | -1.01 | 0.898 | -1.18 | 0.074 | -1.64 | 0.062 | -1.25 |
| 1438972_x_at | 2810410L24Rik      | RIKEN cDNA 2810410L24 gene                                                              | -1.15 | 0.414 | -1.07 | 0.77  | -1.15 | 0.502 | -1.26 | 0.462 | -1.16 |
| 1447883_x_at | Map1lc3a           | microtubule-associated protein 1 light chain 3 alpha                                    | -1.09 | 0.38  | -1.11 | 0.525 | -1.17 | 0.206 | -1.01 | 0.931 | -1.09 |
| 1420895_at   | Tgfb1              | transforming growth factor, beta receptor I                                             | -1.03 | 0.751 | -1.04 | 0.698 | -1.35 | 0.014 | -1.36 | 0.192 | -1.19 |

|              |               |                                                                                     |       |       |       |       |       |       |       |       |       |
|--------------|---------------|-------------------------------------------------------------------------------------|-------|-------|-------|-------|-------|-------|-------|-------|-------|
| 1448641_at   | Mbtd1         | mbt domain containing 1                                                             | -1.05 | 0.513 | -1.08 | 0.311 | -1.25 | 0.141 | -1.26 | 0.041 | -1.16 |
| 1456553_at   | Zcchc11       | Zinc finger, CCHC domain containing 11                                              | -1.02 | 0.922 | -1.15 | 0.484 | -1.21 | 0.264 | -2.37 | 0.112 | -1.44 |
| 1448403_at   | Lars          | leucyl-tRNA synthetase                                                              | -1.15 | 0.467 | -1.04 | 0.32  | -1.18 | 0.256 | -1.01 | 0.953 | -1.09 |
| 1426432_a_at | Slc4a4        | solute carrier family 4 (anion exchanger), member 4                                 | -1.08 | 0.496 | -1.03 | 0.696 | -1.28 | 0.111 | -1.09 | 0.896 | -1.12 |
| 1448707_at   | Taf13         | TAF13 RNA polymerase II, TATA box binding protein (TBP)-associated factor           | -1.05 | 0.712 | -1.03 | 0.661 | -1.31 | 0.042 | -1.28 | 0.167 | -1.17 |
| 1418479_at   | Vps54         | vacuolar protein sorting 54 (yeast)                                                 | -1.16 | 0.375 | -1.2  | 0.043 | -1.02 | 0.749 | -1.1  | 0.341 | -1.12 |
| 1432119_at   | 4933405111Rik | RIKEN cDNA 4933405111 gene                                                          | -1.21 | 0.701 | -1.03 | 0.911 | -1.13 | 0.405 | -1.32 | 0.62  | -1.17 |
| 1426763_at   | Oaz2          | ornithine decarboxylase antizyme 2                                                  | -1.22 | 0.081 | -1    | 0.976 | -1.16 | 0.218 | -1.26 | 0.104 | -1.16 |
| 1448179_at   | Usmg5         | upregulated during skeletal muscle growth 5                                         | -1.22 | 0.005 | -1.13 | 0.692 | -1.03 | 0.923 | -1.33 | 0.21  | -1.18 |
| 1428155_at   | Commd9        | COMM domain containing 9                                                            | -1.12 | 0.697 | -1.09 | 0.457 | -1.16 | 0.255 | -1.05 | 0.687 | -1.1  |
| 1422627_a_at | Mkks          | McKusick-Kaufman syndrome protein                                                   | -1.08 | 0.55  | -1.05 | 0.63  | -1.24 | 0.016 | -1.2  | 0.345 | -1.14 |
| 1429473_at   | 1200003I07Rik | RIKEN cDNA 1200003I07 gene                                                          | -1.17 | 0.499 | -1.08 | 0.057 | -1.11 | 0.172 | -1.58 | 0.063 | -1.23 |
| 1443932_at   | Klhdc1        | kelch domain containing 1                                                           | -1.27 | 0.059 | -1.03 | 0.966 | -1.09 | 0.481 | -1.66 | 0.089 | -1.26 |
| 1437020_at   | Ep400         | E1A binding protein p400                                                            | -1.08 | 0.665 | -1.16 | 0.716 | -1.13 | 0.433 | -1.09 | 0.75  | -1.11 |
| 1435637_at   | Itfg1         | integrin alpha FG-GAP repeat containing 1                                           | -1.11 | 0.085 | -1.12 | 0.081 | -1.13 | 0.144 | -1.16 | 0.427 | -1.13 |
| 1437441_at   | AA388235      | expressed sequence AA388235                                                         | -1.3  | 0.161 | -1.03 | 0.954 | -1.07 | 0.716 | -1.51 | 0.239 | -1.23 |
| 1428337_at   | 1810034K20Rik | RIKEN cDNA 1810034K20 gene                                                          | -1.15 | 0.038 | -1.06 | 0.612 | -1.16 | 0.223 | -1.53 | 0.123 | -1.22 |
| 1427733_a_at | Nfia          | nuclear factor I/A                                                                  | -1.17 | 0.415 | -1.01 | 0.966 | -1.2  | 0.385 | -1.23 | 0.309 | -1.15 |
| 1433953_at   | Zfp277        | zinc finger protein 277                                                             | -1.07 | 0.424 | -1.14 | 0.15  | -1.15 | 0.221 | -1.93 | 0.071 | -1.32 |
| 1441998_at   | ---           | Transcribed locus                                                                   | -1.14 | 0.517 | -1.18 | 0.485 | -1.05 | 0.616 | -1.23 | 0.437 | -1.15 |
| 1424384_a_at | Znrf1         | zinc and ring finger 1                                                              | -1.01 | 0.939 | -1.08 | 0.648 | -1.31 | 0.044 | -2.09 | 0.053 | -1.37 |
| 1437212_at   | B230312I18Rik | RIKEN cDNA B230312I18 gene                                                          | -1.14 | 0.388 | -1    | 0.996 | -1.25 | 0.169 | -1.85 | 0.095 | -1.31 |
| 1422698_s_at | Jarid2        | jumonji, AT rich interactive domain 2                                               | -1.11 | 0.562 | -1.12 | 0.521 | -1.12 | 0.248 | -1.29 | 0.024 | -1.16 |
| 1426241_a_at | Scmh1         | sex comb on midleg homolog 1                                                        | -1.22 | 0.298 | -1.15 | 0.358 | -1.01 | 0.948 | -1.13 | 0.185 | -1.13 |
| 1460429_at   | Cdc5l         | cell division cycle 5-like 5 (S. pombe)                                             | -1.25 | 0.132 | -1.04 | 0.446 | -1.09 | 0.306 | -1.21 | 0.129 | -1.15 |
| 1433648_at   | Spag9         | sperm associated antigen 9                                                          | -1.09 | 0.64  | -1.03 | 0.76  | -1.25 | 0.139 | -1.38 | 0.404 | -1.19 |
| 1417598_a_at | Fxr1h         | fragile X mental retardation gene 1, autosomal homolog                              | -1.12 | 0.544 | -1.27 | 0.006 | -1    | 0.983 | -1.13 | 0.399 | -1.13 |
| 1437447_s_at | Ercc1         | excision repair cross-complementing rodent repair deficiency, complementation g     | -1.11 | 0.537 | -1.07 | 0.775 | -1.19 | 0.067 | -1.37 | 0.272 | -1.18 |
| 1450775_at   | Mos           | Moloney sarcoma oncogene                                                            | -1.25 | 0.597 | -1.11 | 0.502 | -1.02 | 0.926 | -1.51 | 0.018 | -1.22 |
| 1415729_at   | Pdpk1         | 3-phosphoinositide dependent protein kinase-1                                       | -1.1  | 0.482 | -1.13 | 0.302 | -1.12 | 0.37  | -1.06 | 0.672 | -1.1  |
| 1420731_a_at | Csrp2         | cysteine and glycine-rich protein 2                                                 | -1.03 | 0.394 | -1.11 | 0.209 | -1.23 | 0.284 | -1.64 | 0.078 | -1.25 |
| 1429699_at   | Oxsm          | 3-oxoacyl-ACP synthase, mitochondrial                                               | -1.01 | 0.966 | -1.33 | 0.025 | -1.07 | 0.823 | -1.04 | 0.845 | -1.11 |
| 1452897_at   | Cdc2l5        | cell division cycle 2-like 5 (cholinesterase-related cell division controller)      | -1.18 | 0.002 | -1.13 | 0.278 | -1.05 | 0.643 | -1.35 | 0.056 | -1.18 |
| 1432902_at   | 9130414P19Rik | RIKEN cDNA 9130414P19 gene                                                          | -1.24 | 0.669 | -1.02 | 0.901 | -1.11 | 0.549 | -1.4  | 0.653 | -1.19 |
| 1452710_at   | Rpsd4         | RNA pseudouridylation synthase domain containing 4                                  | -1.12 | 0.224 | -1.11 | 0.603 | -1.12 | 0.434 | -1.3  | 0.08  | -1.16 |
| 1441052_at   | 2310035C23Rik | RIKEN cDNA 2310035C23 gene                                                          | -1.06 | 0.329 | -1.09 | 0.614 | -1.22 | 0.082 | -1.37 | 0.055 | -1.19 |
| 1435746_at   | Srpk2         | serine/arginine-rich protein specific kinase 2                                      | -1    | 0.999 | -1.03 | 0.768 | -1.41 | 0.098 | -1.69 | 0.099 | -1.28 |
| 1418440_at   | Col8a1        | procollagen, type VIII, alpha 1                                                     | -1.22 | 0.543 | -1.11 | 0.776 | -1.04 | 0.855 | -1.01 | 0.966 | -1.1  |
| 1425201_a_at | Hyl           | hydroxypyruvate isomerase homolog (E. coli)                                         | -1.02 | 0.927 | -1.28 | 0.453 | -1.09 | 0.67  | -1.7  | 0.004 | -1.27 |
| 1426494_at   | Rg9mtd3       | RNA (guanine-9-) methyltransferase domain containing 3                              | -1.08 | 0.593 | -1.08 | 0.355 | -1.2  | 0.134 | -1.28 | 0.211 | -1.16 |
| 1437196_x_at | Rps16         | ribosomal protein S16                                                               | -1    | 0.974 | -1.05 | 0.694 | -1.36 | 0.006 | -1.32 | 0.007 | -1.18 |
| 1424792_at   | Rpp40         | ribonuclease P 40 subunit (human)                                                   | -1.25 | 0.184 | -1.06 | 0.765 | -1.07 | 0.538 | -1.27 | 0.369 | -1.16 |
| 1426424_at   | Sugt1         | SGT1, suppressor of G2 allele of SKP1 (S. cerevisiae)                               | -1.07 | 0.434 | -1.15 | 0.536 | -1.14 | 0.034 | -1.15 | 0.308 | -1.13 |
| 1453846_at   | 2810013C04Rik | RIKEN cDNA 2810013C04 gene                                                          | -1.19 | 0.718 | -1.03 | 0.937 | -1.15 | 0.16  | -1.78 | 0.035 | -1.29 |
| 1459952_at   | Ankrd17       | Ankyrin repeat domain 17                                                            | -1.04 | 0.618 | -1.04 | 0.833 | -1.32 | 0.223 | -1.5  | 0.073 | -1.22 |
| 1446923_at   | Ptplb         | Protein tyrosine phosphatase-like (proline instead of catalytic arginine), member t | -1.09 | 0.484 | -1.11 | 0.758 | -1.16 | 0.549 | -1.41 | 0.403 | -1.19 |
| 1455180_at   | AA407270      | expressed sequence AA407270                                                         | -1.01 | 0.959 | -1.16 | 0.716 | -1.21 | 0.197 | -1.48 | 0.261 | -1.21 |
| 1449118_at   | Dbt           | dihydrolipoamide branched chain transacylase E2                                     | -1.14 | 0.027 | -1.17 | 0.133 | -1.06 | 0.575 | -1.14 | 0.444 | -1.13 |
| 1437203_at   | Cbl1          | Casitas B-lineage lymphoma-like 1                                                   | -1.12 | 0.146 | -1.07 | 0.562 | -1.16 | 0.078 | -1.3  | 0.267 | -1.16 |
| 1417683_at   | Diablo        | diablo homolog (Drosophila)                                                         | -1.14 | 0.124 | -1.09 | 0.057 | -1.12 | 0.109 | -1.09 | 0.291 | -1.11 |
| 1455006_at   | 2310016M24Rik | RIKEN cDNA 2310016M24 gene                                                          | -1.06 | 0.432 | -1.17 | 0.163 | -1.13 | 0.311 | -1.27 | 0.298 | -1.16 |
| 1426490_at   | Bfar          | bifunctional apoptosis regulator                                                    | -1.03 | 0.503 | -1.19 | 0.118 | -1.16 | 0.266 | -1.37 | 0.153 | -1.18 |
| 1423641_s_at | Cnot7         | CCR4-NOT transcription complex, subunit 7                                           | -1.13 | 0.249 | -1.06 | 0.436 | -1.17 | 0.049 | -1.12 | 0.449 | -1.12 |

|              |                     |                                                                                |       |       |       |       |       |       |       |       |       |
|--------------|---------------------|--------------------------------------------------------------------------------|-------|-------|-------|-------|-------|-------|-------|-------|-------|
| 1419979_s_at | Creb3               | cAMP responsive element binding protein 3                                      | -1.05 | 0.033 | -1.03 | 0.68  | -1.3  | 0.012 | -1.06 | 0.626 | -1.11 |
| 1422805_a_at | Ing3                | inhibitor of growth family, member 3                                           | -1.2  | 0.018 | -1.07 | 0.547 | -1.09 | 0.641 | -1.52 | 0.177 | -1.22 |
| 1422697_s_at | ---                 | ---                                                                            | -1.14 | 0.339 | -1.07 | 0.165 | -1.14 | 0.121 | -1.27 | 0.048 | -1.16 |
| 1415774_at   | Statip1             | signal transducer and activator of transcription interacting protein 1         | -1.15 | 0.69  | -1.05 | 0.746 | -1.16 | 0.279 | -1.22 | 0.418 | -1.15 |
| 1433516_a_at | Myeov2              | myeloma overexpressed 2                                                        | -1.06 | 0.524 | -1.01 | 0.879 | -1.34 | 0.097 | -1.62 | 0.106 | -1.26 |
| 1428083_at   | 2310043N10Rik       | RIKEN cDNA 2310043N10 gene                                                     | -1.11 | 0.597 | -1.24 | 0.386 | -1.02 | 0.918 | -1.18 | 0.48  | -1.14 |
| 1433726_at   | ---                 | ---                                                                            | -1.11 | 0.397 | -1.08 | 0.548 | -1.17 | 0.004 | -1.24 | 0.368 | -1.15 |
| 1454785_at   | Dusp11              | dual specificity phosphatase 11 (RNA/RNP complex 1-interacting)                | -1.07 | 0.689 | -1.17 | 0.08  | -1.12 | 0.31  | -1.24 | 0.238 | -1.15 |
| 1435174_at   | Rsbm1               | rosbin, round spermatid basic protein 1                                        | -1.14 | 0.464 | -1.01 | 0.934 | -1.21 | 0.009 | -1.23 | 0.276 | -1.15 |
| 1444051_at   | 5830405N20Rik       | RIKEN cDNA 5830405N20 gene                                                     | -1.21 | 0.507 | -1.14 | 0.423 | -1.02 | 0.93  | -2.05 | 0.087 | -1.35 |
| 1423665_a_at | Rpl5                | ribosomal protein L5                                                           | -1.11 | 0.212 | -1.05 | 0.372 | -1.19 | 0.01  | -1.21 | 0.005 | -1.14 |
| 1448157_s_at | Rpl10               | ribosomal protein 10                                                           | -1.04 | 0.239 | -1.06 | 0.65  | -1.28 | 0     | -1.24 | 0.032 | -1.15 |
| 1429400_at   | Clcn5               | chloride channel 5                                                             | -1.18 | 0.33  | -1.08 | 0.277 | -1.09 | 0.186 | -1.11 | 0.721 | -1.12 |
| 1452604_at   | Stard13             | serologically defined colon cancer antigen 13                                  | -1.3  | 0.026 | -1.04 | 0.859 | -1.04 | 0.869 | -1.68 | 0.081 | -1.27 |
| 1454747_a_at | Klhdc3              | kelch domain containing 3                                                      | -1.22 | 0.001 | -1.12 | 0.218 | -1.03 | 0.832 | -1.07 | 0.684 | -1.11 |
| 1424358_at   | Ube2e2              | ubiquitin-conjugating enzyme E2E 2 (UBC4/5 homolog, yeast)                     | -1    | 0.975 | -1.05 | 0.536 | -1.35 | 0.119 | -2.41 | 0.024 | -1.45 |
| 1452083_a_at | Pja1                | praja1, RING-H2 motif containing                                               | -1.12 | 0.594 | -1.11 | 0.537 | -1.12 | 0.387 | -1.25 | 0.545 | -1.15 |
| 1448801_a_at | Timm44              | translocase of inner mitochondrial membrane 44                                 | -1.19 | 0.141 | -1.12 | 0.107 | -1.05 | 0.775 | -1.09 | 0.462 | -1.11 |
| 1450664_at   | Gabpa               | GA repeat binding protein, alpha                                               | -1.27 | 0.077 | -1.03 | 0.524 | -1.08 | 0.302 | -1.07 | 0.423 | -1.11 |
| 1420489_at   | Mrps14              | mitochondrial ribosomal protein S14                                            | -1.13 | 0.267 | -1.15 | 0.008 | -1.08 | 0.224 | -1.14 | 0.419 | -1.12 |
| 1449686_s_at | Scp2                | sterol carrier protein 2, liver                                                | -1.09 | 0.476 | -1.09 | 0.363 | -1.18 | 0.181 | -1.53 | 0.164 | -1.22 |
| 1434742_s_at | 2810401C16Rik       | RIKEN cDNA 2810401C16 gene                                                     | -1.17 | 0.599 | -1.09 | 0.719 | -1.09 | 0.788 | -1.05 | 0.931 | -1.1  |
| 1458501_at   | Vapb                | vesicle-associated membrane protein, associated protein B and C                | -1.04 | 0.897 | -1.06 | 0.781 | -1.28 | 0.052 | -1.04 | 0.853 | -1.1  |
| 1426870_at   | Fbxo33              | F-box only protein 33                                                          | -1.15 | 0.252 | -1.08 | 0.544 | -1.12 | 0.33  | -1.06 | 0.733 | -1.1  |
| 1448356_at   | Ube2d2              | ubiquitin-conjugating enzyme E2D 2                                             | -1.01 | 0.818 | -1.16 | 0.02  | -1.2  | 0.002 | -1.31 | 0.132 | -1.17 |
| 1423893_x_at | Apbb1               | amyloid beta (A4) precursor protein-binding, family B, member 1                | -1.07 | 0.74  | -1.26 | 0.584 | -1.04 | 0.556 | -1.34 | 0.163 | -1.18 |
| 1437696_at   | BC049807            | cDNA sequence BC049807                                                         | -1.05 | 0.906 | -1.07 | 0.786 | -1.25 | 0.344 | -1.07 | 0.765 | -1.11 |
| 1436597_at   | Ankhd1              | ankyrin repeat and KH domain containing 1                                      | -1.15 | 0.645 | -1.09 | 0.417 | -1.12 | 0.367 | -1.43 | 0.073 | -1.2  |
| 1454722_at   | Pten                | phosphatase and tensin homolog                                                 | -1.06 | 0.635 | -1.02 | 0.085 | -1.3  | 0.132 | -1.44 | 0.278 | -1.21 |
| 1435317_x_at | Psma6               | proteasome (prosome, macropain) subunit, alpha type 6                          | -1.16 | 0.258 | -1.01 | 0.938 | -1.19 | 0.379 | -1.33 | 0.252 | -1.17 |
| 1452878_at   | Prkce               | protein kinase C, epsilon                                                      | -1.26 | 0.12  | -1    | 0.986 | -1.12 | 0.492 | -1.2  | 0.448 | -1.14 |
| 1443573_at   | Parp1               | poly (ADP-ribose) polymerase family, member 1                                  | -1.08 | 0.817 | -1.1  | 0.748 | -1.17 | 0.468 | -1.39 | 0.289 | -1.19 |
| 1445960_at   | ---                 | ---                                                                            | -1.13 | 0.813 | -1.13 | 0.768 | -1.09 | 0.627 | -1.64 | 0.303 | -1.25 |
| 1430060_at   | 1700034G24Rik       | RIKEN cDNA 1700034G24 gene                                                     | -1.02 | 0.922 | -1.2  | 0.384 | -1.14 | 0.339 | -1.25 | 0.262 | -1.15 |
| 1426558_x_at | 3100002L24Rik /// I | RIKEN cDNA 3100002L24 gene /// similar to zinc finger protein 14 /// RIKEN cDN | -1.22 | 0.218 | -1.14 | 0.11  | -1.01 | 0.946 | -1.13 | 0.468 | -1.12 |
| 1439108_at   | MLI5                | myeloid/lymphoid or mixed-lineage leukemia 5                                   | -1.05 | 0.859 | -1.33 | 0.022 | -1.02 | 0.946 | -1.32 | 0.243 | -1.18 |
| 1431500_at   | 4933406J10Rik       | RIKEN cDNA 4933406J10 gene                                                     | -1.01 | 0.962 | -1.08 | 0.708 | -1.3  | 0.345 | -1.23 | 0.202 | -1.15 |
| 1416244_a_at | Cnbp                | cellular nucleic acid binding protein                                          | -1.06 | 0.224 | -1.19 | 0.108 | -1.1  | 0.228 | -1.15 | 0.074 | -1.13 |
| 1423911_at   | Ppp2r5a             | protein phosphatase 2, regulatory subunit B (B56), alpha isoform               | -1.17 | 0.199 | -1.1  | 0.432 | -1.08 | 0.154 | -1.29 | 0.29  | -1.16 |
| 1438626_x_at | Rpl14               | ribosomal protein L14                                                          | -1.19 | 0.264 | -1.05 | 0.633 | -1.12 | 0.411 | -1.31 | 0.024 | -1.17 |
| 1430045_at   | Tsnax               | translin-associated factor X                                                   | -1.03 | 0.884 | -1.02 | 0.828 | -1.35 | 0.139 | -1.23 | 0.247 | -1.16 |
| 1434332_at   | Zzz3                | zinc finger, ZZ domain containing 3                                            | -1.05 | 0.314 | -1.17 | 0.067 | -1.12 | 0.026 | -1.1  | 0.298 | -1.11 |
| 1437256_at   | ---                 | ---                                                                            | -1.1  | 0.821 | -1.26 | 0.648 | -1.02 | 0.957 | -2.06 | 0.184 | -1.36 |
| 1449679_s_at | Stx5a               | syntaxin 5A                                                                    | -1.06 | 0.092 | -1.06 | 0.615 | -1.24 | 0.076 | -1.14 | 0.199 | -1.13 |
| 1452790_x_at | Ndufa3              | NADH dehydrogenase (ubiquinone) 1 alpha subcomplex, 3                          | -1.04 | 0.755 | -1.21 | 0.028 | -1.11 | 0.448 | -1.13 | 0.353 | -1.12 |
| 1426578_s_at | Snapap              | SNAP-associated protein                                                        | -1.01 | 0.932 | -1.22 | 0.344 | -1.13 | 0.639 | -1.1  | 0.596 | -1.12 |
| 1449585_at   | Il1rap              | interleukin 1 receptor accessory protein                                       | -1.07 | 0.903 | -1.29 | 0.104 | -1.01 | 0.961 | -1    | 0.993 | -1.1  |
| 1454595_at   | 4930451E06Rik       | RIKEN cDNA 4930451E06 gene                                                     | -1.1  | 0.876 | -1.13 | 0.699 | -1.11 | 0.82  | -1.39 | 0.194 | -1.18 |
| 1434486_x_at | Ugp2                | UDP-glucose pyrophosphorylase 2                                                | -1.09 | 0.263 | -1.15 | 0.404 | -1.1  | 0.334 | -1.13 | 0.681 | -1.12 |
| 1434402_at   | Samd8               | sterile alpha motif domain containing 8                                        | -1.19 | 0.265 | -1.09 | 0.434 | -1.07 | 0.666 | -1.22 | 0.307 | -1.14 |
| 1438563_s_at | Mrps24              | mitochondrial ribosomal protein S24                                            | -1.01 | 0.944 | -1.06 | 0.646 | -1.32 | 0.131 | -1.13 | 0.532 | -1.13 |
| 1424862_s_at | Mib2                | mindbomb homolog 2 (Drosophila)                                                | -1.04 | 0.894 | -1.19 | 0.354 | -1.13 | 0.46  | -1.21 | 0.437 | -1.14 |
| 1435440_at   | Pdzd8               | PDZ domain containing 8                                                        | -1.01 | 0.932 | -1.18 | 0.017 | -1.17 | 0.186 | -1.07 | 0.255 | -1.11 |

|              |                   |                                                                                       |       |       |       |       |       |       |       |       |       |
|--------------|-------------------|---------------------------------------------------------------------------------------|-------|-------|-------|-------|-------|-------|-------|-------|-------|
| 1420583_a_at | Rora              | RAR-related orphan receptor alpha                                                     | -1.06 | 0.746 | -1.11 | 0.46  | -1.18 | 0.181 | -1.26 | 0.114 | -1.15 |
| 1439998_at   | Jmjd1c            | jumonji domain containing 1C                                                          | -1.02 | 0.943 | -1.04 | 0.773 | -1.33 | 0.214 | -1.6  | 0.11  | -1.25 |
| 1422517_a_at | Znrd1             | zinc ribbon domain containing, 1                                                      | -1.03 | 0.498 | -1.01 | 0.726 | -1.36 | 0.017 | -1.58 | 0.134 | -1.25 |
| 1452266_at   | Las1l             | LAS1-like (S. cerevisiae)                                                             | -1.05 | 0.335 | -1.17 | 0.056 | -1.13 | 0.541 | -1.13 | 0.27  | -1.12 |
| 1454064_a_at | Rnf138            | ring finger protein 138                                                               | -1.16 | 0.408 | -1.11 | 0.269 | -1.08 | 0.479 | -1.55 | 0.073 | -1.22 |
| 1452188_at   | Maml1             | mastermind like 1 (Drosophila)                                                        | -1.19 | 0.005 | -1.14 | 0.311 | -1.02 | 0.859 | -1.38 | 0.087 | -1.18 |
| 1423338_at   | Ccdc16            | coiled-coil domain containing 16                                                      | -1.14 | 0.308 | -1.19 | 0.067 | -1.03 | 0.855 | -1.15 | 0.311 | -1.13 |
| 1416153_at   | Srp54 /// LOC6651 | signal recognition particle 54 /// similar to signal recognition particle 54          | -1.19 | 0.032 | -1.05 | 0.348 | -1.11 | 0.396 | -1.08 | 0.37  | -1.11 |
| 1456726_x_at | Qars              | glutamyl-tRNA synthetase                                                              | -1.13 | 0.158 | -1.17 | 0.16  | -1.05 | 0.688 | -1.38 | 0.043 | -1.18 |
| 1429351_at   | Klhl24            | kelch-like 24 (Drosophila)                                                            | -1.16 | 0.477 | -1.11 | 0.13  | -1.07 | 0.65  | -1.78 | 0.229 | -1.28 |
| 1415942_at   | Rpl10 /// LOC2347 | ribosomal protein 10 /// similar to ribosomal protein L10 /// similar to ribosomal pr | -1.02 | 0.871 | -1.14 | 0.328 | -1.2  | 0.004 | -1.18 | 0.013 | -1.13 |
| 1448427_at   | Ndufa6            | NADH dehydrogenase (ubiquinone) 1 alpha subcomplex, 6 (B14)                           | -1.06 | 0.394 | -1.17 | 0.099 | -1.11 | 0.181 | -1.4  | 0.128 | -1.19 |
| 1418815_at   | Cdh2              | cadherin 2                                                                            | -1.02 | 0.795 | -1    | 0.974 | -1.39 | 0.377 | -1.2  | 0.72  | -1.15 |
| 1424545_at   | BC003965          | cDNA sequence BC003965                                                                | -1.05 | 0.391 | -1.14 | 0.047 | -1.16 | 0.154 | -1.07 | 0.466 | -1.11 |
| 1425085_at   | 6330416L07Rik     | RIKEN cDNA 6330416L07 gene                                                            | -1.35 | 0.338 | -1.03 | 0.81  | -1.02 | 0.951 | -1    | 0.992 | -1.1  |
| 1448760_at   | Zfp68             | zinc finger protein 68                                                                | -1.02 | 0.885 | -1.06 | 0.143 | -1.3  | 0.067 | -1.41 | 0.214 | -1.2  |
| 1419374_at   | Wbp4              | VW domain binding protein 4                                                           | -1.08 | 0.602 | -1.08 | 0.216 | -1.18 | 0.187 | -1.02 | 0.929 | -1.09 |
| 1419112_at   | Nlk               | nemo like kinase                                                                      | -1.16 | 0.175 | -1.06 | 0.643 | -1.12 | 0.302 | -1.74 | 0.045 | -1.27 |
| 1417934_at   | Dnajc4            | DnaJ (Hsp40) homolog, subfamily C, member 4                                           | -1.19 | 0.052 | -1.17 | 0.184 | -1    | 0.965 | -1.34 | 0.044 | -1.17 |
| 1419352_at   | 0610007P06Rik     | RIKEN cDNA 0610007P06 gene                                                            | -1.17 | 0.247 | -1.15 | 0.175 | -1.03 | 0.847 | -1.05 | 0.742 | -1.1  |
| 1451804_a_at | Lrrc16            | leucine rich repeat containing 16                                                     | -1    | 0.983 | -1.39 | 0.265 | -1.02 | 0.953 | -2.18 | 0.073 | -1.4  |
| 1434683_at   | Cutl1             | Cut-like 1 (Drosophila)                                                               | -1.19 | 0.144 | -1.03 | 0.887 | -1.13 | 0.376 | -1.18 | 0.565 | -1.13 |
| 1430264_at   | 2610030P05Rik     | RIKEN cDNA 2610030P05 gene                                                            | -1.1  | 0.789 | -1.04 | 0.815 | -1.22 | 0.13  | -1.19 | 0.191 | -1.14 |
| 1423840_at   | Ccdc56            | coiled-coil domain containing 56                                                      | -1.19 | 0.325 | -1.08 | 0.52  | -1.08 | 0.782 | -1.53 | 0.209 | -1.22 |
| 1453491_at   | 4833409A17Rik     | RIKEN cDNA 4833409A17 gene                                                            | -1.14 | 0.689 | -1.21 | 0.646 | -1.01 | 0.984 | -2.33 | 0.048 | -1.42 |
| 1433831_at   | 4833418A01Rik     | RIKEN cDNA 4833418A01 gene                                                            | -1.04 | 0.718 | -1.01 | 0.928 | -1.35 | 0.044 | -1.66 | 0.021 | -1.26 |
| 1422858_at   | Trip4             | thyroid hormone receptor interactor 4                                                 | -1.12 | 0.188 | -1.05 | 0.584 | -1.17 | 0.418 | -1.17 | 0.154 | -1.13 |
| 1424607_a_at | BC003993 /// LOC5 | cDNA sequence BC003993 /// hypothetical LOC544818                                     | -1.04 | 0.859 | -1.14 | 0.013 | -1.17 | 0.322 | -1.05 | 0.526 | -1.1  |
| 1416751_a_at | Ddx20             | DEAD (Asp-Glu-Ala-Asp) box polypeptide 20                                             | -1.12 | 0.535 | -1.23 | 0.22  | -1.01 | 0.859 | -1.01 | 0.955 | -1.09 |
| 1419360_a_at | Ss18              | synovial sarcoma translocation, Chromosome 18                                         | -1.05 | 0.69  | -1.09 | 0.128 | -1.2  | 0.11  | -1.24 | 0.341 | -1.15 |
| 1438288_x_at | 1110059G02Rik     | RIKEN cDNA 1110059G02 gene                                                            | -1.24 | 0.178 | -1.11 | 0.664 | -1.01 | 0.951 | -1.27 | 0.244 | -1.16 |
| 1460716_a_at | Cbfb              | core binding factor beta                                                              | -1.04 | 0.429 | -1.11 | 0.491 | -1.2  | 0.124 | -1.53 | 0.168 | -1.22 |
| 1439504_s_at | Zfp28             | zinc finger protein 28                                                                | -1.18 | 0.562 | -1.17 | 0.803 | -1.01 | 0.986 | -1.78 | 0.303 | -1.28 |
| 1415722_a_at | 1110059P08Rik     | RIKEN cDNA 1110059P08 gene                                                            | -1.11 | 0.232 | -1.11 | 0.176 | -1.11 | 0.351 | -1.19 | 0.268 | -1.13 |
| 1455402_at   | Socs7             | suppressor of cytokine signaling 7                                                    | -1.25 | 0.102 | -1.05 | 0.659 | -1.06 | 0.637 | -1.17 | 0.183 | -1.13 |
| 1434551_at   | Hnrp12            | heterogeneous nuclear ribonucleoprotein U-like 2                                      | -1.15 | 0.457 | -1.15 | 0.395 | -1.04 | 0.831 | -1.02 | 0.928 | -1.09 |
| 1423923_a_at | Wdr8              | WD repeat domain 8                                                                    | -1    | 0.986 | -1.25 | 0.222 | -1.11 | 0.095 | -1.1  | 0.528 | -1.12 |
| 1452048_at   | Mrpl12            | mitochondrial ribosomal protein L12                                                   | -1.06 | 0.455 | -1.1  | 0.1   | -1.18 | 0.029 | -1.14 | 0.472 | -1.12 |
| 1435442_at   | Wdsof1            | WD repeats and SOF domain containing 1                                                | -1.09 | 0.437 | -1.16 | 0.187 | -1.09 | 0.589 | -1.17 | 0.205 | -1.13 |
| 1433934_at   | Sec24a            | SEC24 related gene family, member A (S. cerevisiae)                                   | -1.22 | 0.287 | -1.04 | 0.678 | -1.09 | 0.493 | -1.08 | 0.781 | -1.11 |
| 1425672_a_at | Trpc2             | transient receptor potential cation channel, subfamily C, member 2                    | -1.06 | 0.746 | -1.1  | 0.54  | -1.18 | 0.582 | -1.35 | 0.648 | -1.17 |
| 1429160_at   | 2810012L14Rik     | RIKEN cDNA 2810012L14 gene                                                            | -1    | 0.982 | -1.27 | 0.137 | -1.09 | 0.657 | -1.85 | 0.112 | -1.3  |
| 1424309_a_at | Mocs2             | molybdenum cofactor synthesis 2                                                       | -1.06 | 0.372 | -1.18 | 0.095 | -1.09 | 0.233 | -1.12 | 0.052 | -1.12 |
| 1424209_at   | Rarsl             | arginyl-tRNA synthetase-like                                                          | -1.26 | 0.167 | -1.09 | 0.293 | -1.01 | 0.922 | -1.04 | 0.713 | -1.1  |
| 1454641_at   | Cggbp1            | CGG triplet repeat binding protein 1                                                  | -1.1  | 0.02  | -1.03 | 0.546 | -1.22 | 0.016 | -1.04 | 0.042 | -1.1  |
| 1435590_at   | D430047L21Rik     | RIKEN cDNA D430047L21 gene                                                            | -1.02 | 0.953 | -1.09 | 0.7   | -1.26 | 0.353 | -1.18 | 0.446 | -1.14 |
| 1448965_at   | Inoc1             | INO80 complex homolog 1 (S. cerevisiae)                                               | -1.1  | 0.722 | -1.22 | 0.24  | -1.03 | 0.926 | -1.12 | 0.74  | -1.12 |
| 1454756_at   | Lrch3             | leucine-rich repeats and calponin homology (CH) domain containing 3                   | -1.19 | 0.357 | -1.05 | 0.629 | -1.1  | 0.652 | -1.62 | 0.081 | -1.24 |
| 1424703_at   | Hemk1             | HemK methyltransferase family member 1                                                | -1.07 | 0.65  | -1.26 | 0.152 | -1.03 | 0.941 | -1.62 | 0.123 | -1.24 |
| 1460339_at   | Pasma4            | proteasome (prosome, macropain) subunit, alpha type 4                                 | -1.12 | 0.098 | -1.12 | 0.246 | -1.1  | 0.272 | -1.17 | 0.483 | -1.13 |
| 1457046_s_at | C77370            | expressed sequence C77370                                                             | -1.15 | 0.779 | -1.12 | 0.717 | -1.06 | 0.888 | -1.93 | 0.435 | -1.32 |
| 1420265_x_at | Cog8              | component of oligomeric golgi complex 8                                               | -1.23 | 0.268 | -1.09 | 0.478 | -1.04 | 0.898 | -1.73 | 0.02  | -1.27 |
| 1422797_at   | Mapbpip           | mitogen activated protein binding protein interacting protein                         | -1.11 | 0.203 | -1.18 | 0.141 | -1.05 | 0.209 | -1.63 | 0.063 | -1.24 |

|              |                    |                                                                                       |       |       |       |       |       |       |       |       |       |
|--------------|--------------------|---------------------------------------------------------------------------------------|-------|-------|-------|-------|-------|-------|-------|-------|-------|
| 1452166_a_at | Krt10              | keratin 10                                                                            | -1.04 | 0.027 | -1.06 | 0.67  | -1.26 | 0.071 | -1.21 | 0.503 | -1.14 |
| 1431028_a_at | Pank1              | pantothenate kinase 1                                                                 | -1.06 | 0.849 | -1.09 | 0.55  | -1.19 | 0.26  | -1.24 | 0.354 | -1.15 |
| 1433830_at   | Hnrpa2b1           | heterogeneous nuclear ribonucleoprotein A2/B1                                         | -1.22 | 0.152 | -1.04 | 0.562 | -1.09 | 0.488 | -1.15 | 0.407 | -1.12 |
| 1416983_s_at | Foxo1              | forkhead box O1                                                                       | -1.07 | 0.801 | -1.17 | 0.495 | -1.1  | 0.587 | -2.06 | 0.101 | -1.35 |
| 1434841_at   | BC010584           | CDNA sequence BC010584                                                                | -1.14 | 0.259 | -1.02 | 0.905 | -1.2  | 0.255 | -1.41 | 0.143 | -1.19 |
| 1456253_s_at | Plekhn1 /// Kihl17 | pleckstrin homology domain containing, family N member 1 /// kelch-like 17 (Dros      | -1.02 | 0.919 | -1.19 | 0.17  | -1.13 | 0.287 | -1.05 | 0.676 | -1.1  |
| 1435149_at   | Plcg1              | phospholipase C, gamma 1                                                              | -1.02 | 0.895 | -1.14 | 0.332 | -1.18 | 0.437 | -1.55 | 0.278 | -1.22 |
| 1454217_at   | 4930556N09Rik      | RIKEN cDNA 4930556N09 gene                                                            | -1.24 | 0.776 | -1.04 | 0.794 | -1.07 | 0.875 | -1.4  | 0.079 | -1.19 |
| 1433397_at   | 9430012M22Rik      | RIKEN cDNA 9430012M22 gene                                                            | -1.19 | 0.534 | -1.14 | 0.769 | -1.01 | 0.972 | -2.13 | 0.051 | -1.37 |
| 1440130_at   | BB116930           | expressed sequence BB116930                                                           | -1.36 | 0.133 | -1.03 | 0.932 | -1    | 0.994 | -1.31 | 0.346 | -1.18 |
| 1424839_a_at | Nsun4              | NOL1/NOP2/Sun domain family, member 4                                                 | -1.21 | 0.269 | -1.11 | 0.512 | -1.03 | 0.827 | -1.11 | 0.302 | -1.11 |
| 1460680_a_at | Rpl23              | ribosomal protein L23                                                                 | -1.15 | 0.237 | -1.05 | 0.381 | -1.15 | 0.087 | -1.34 | 0.011 | -1.17 |
| 1433824_x_at | Grsf1              | G-rich RNA sequence binding factor 1                                                  | -1.18 | 0.298 | -1.16 | 0.057 | -1.01 | 0.857 | -1.25 | 0.127 | -1.15 |
| 1436121_a_at | Nsmce1             | non-SMC element 1 homolog (S. cerevisiae)                                             | -1.08 | 0.154 | -1.09 | 0.009 | -1.16 | 0.201 | -1.31 | 0.277 | -1.16 |
| 1454022_at   | Ephb2              | Eph receptor B2                                                                       | -1.22 | 0.434 | -1.05 | 0.722 | -1.07 | 0.534 | -1.07 | 0.719 | -1.1  |
| 1419636_at   | 4833420G17Rik      | RIKEN cDNA 4833420G17 gene                                                            | -1.05 | 0.813 | -1.11 | 0.475 | -1.17 | 0.457 | -1.65 | 0.052 | -1.25 |
| 1432271_a_at | Dcun1d5            | DCN1, defective in cullin neddylation 1, domain containing 5 (S. cerevisiae)          | -1.12 | 0.321 | -1.11 | 0.204 | -1.1  | 0.442 | -1.19 | 0.274 | -1.13 |
| 1417792_at   | Zfml               | zinc finger, matrin-like                                                              | -1.02 | 0.829 | -1.26 | 0.272 | -1.08 | 0.679 | -1.08 | 0.749 | -1.11 |
| 1447923_at   | 2810013C04Rik      | RIKEN cDNA 2810013C04 gene                                                            | -1.17 | 0.543 | -1.03 | 0.744 | -1.14 | 0.206 | -2.02 | 0.063 | -1.34 |
| 1423625_a_at | Dnajc19            | DnaJ (Hsp40) homolog, subfamily C, member 19                                          | -1.08 | 0.63  | -1.11 | 0.368 | -1.14 | 0.459 | -1.23 | 0.492 | -1.14 |
| 1436982_at   | Tnrc6b             | trinucleotide repeat containing 6b                                                    | -1.12 | 0.334 | -1.07 | 0.529 | -1.14 | 0.464 | -1.03 | 0.606 | -1.09 |
| 1416857_at   | Sdf2               | stromal cell derived factor 2                                                         | -1.06 | 0.144 | -1.09 | 0.018 | -1.19 | 0.031 | -1.24 | 0.337 | -1.14 |
| 1416764_at   | Fis1               | fission 1 (mitochondrial outer membrane) homolog (yeast)                              | -1.09 | 0.532 | -1.02 | 0.698 | -1.24 | 0.08  | -1.19 | 0.375 | -1.14 |
| 1455195_at   | Rps24              | ribosomal protein S24                                                                 | -1.16 | 0.055 | -1.07 | 0.502 | -1.1  | 0.641 | -1.49 | 0.038 | -1.21 |
| 1437776_at   | Tmcc1              | transmembrane and coiled coil domains 1                                               | -1.07 | 0.688 | -1.11 | 0.619 | -1.16 | 0.089 | -1.29 | 0.023 | -1.16 |
| 1427095_at   | Cdcp1              | CUB domain containing protein 1                                                       | -1.18 | 0.245 | -1.01 | 0.938 | -1.15 | 0.203 | -1.21 | 0.507 | -1.14 |
| 1429949_at   | 6530415H11Rik      | RIKEN cDNA 6530415H11 gene                                                            | -1.07 | 0.747 | -1.29 | 0.302 | -1.01 | 0.977 | -1.01 | 0.909 | -1.1  |
| 1428357_at   | 2610019F03Rik      | RIKEN cDNA 2610019F03 gene                                                            | -1.06 | 0.642 | -1.17 | 0.385 | -1.1  | 0.723 | -2.74 | 0.126 | -1.52 |
| 1427544_a_at | Papola             | poly (A) polymerase alpha                                                             | -1.03 | 0.937 | -1.23 | 0.27  | -1.1  | 0.684 | -1.06 | 0.797 | -1.1  |
| 1434377_x_at | Rps6 /// LOC66773  | ribosomal protein S6 /// similar to 40S ribosomal protein S6 /// similar to 40S ribos | -1.07 | 0.14  | -1.04 | 0.574 | -1.24 | 0.003 | -1.25 | 0.004 | -1.15 |
| 1416981_at   | Foxo1              | forkhead box O1                                                                       | -1.03 | 0.848 | -1.2  | 0.294 | -1.1  | 0.493 | -2.31 | 0.052 | -1.41 |
| 1450949_at   | Katna1             | katanin p60 (ATPase-containing) subunit A1                                            | -1.09 | 0.568 | -1.23 | 0.019 | -1.03 | 0.82  | -1.06 | 0.693 | -1.1  |
| 1429711_at   | Styx               | phosphoserine/threonine/tyrosine interaction protein                                  | -1.04 | 0.547 | -1.02 | 0.838 | -1.3  | 0.099 | -1.15 | 0.122 | -1.13 |
| 1426810_at   | Jmjd1a             | jumonji domain containing 1A                                                          | -1.15 | 0.388 | -1.09 | 0.443 | -1.09 | 0.39  | -1.15 | 0.002 | -1.12 |
| 1420862_at   | Dctn4              | dynactin 4                                                                            | -1.07 | 0.444 | -1.2  | 0.129 | -1.07 | 0.527 | -1.11 | 0.559 | -1.11 |
| 1428163_at   | Sar1b              | SAR1 gene homolog B (S. cerevisiae)                                                   | -1.05 | 0.588 | -1.14 | 0.415 | -1.14 | 0.135 | -1.03 | 0.778 | -1.09 |
| 1448347_a_at | Gpiap1             | GPI-anchored membrane protein 1                                                       | -1.07 | 0.679 | -1.05 | 0.708 | -1.22 | 0.085 | -1.02 | 0.742 | -1.09 |
| 1442243_at   | Per3               | period homolog 3 (Drosophila)                                                         | -1.05 | 0.903 | -1.09 | 0.865 | -1.19 | 0.733 | -1.06 | 0.376 | -1.1  |
| 1448286_at   | Hadh2              | hydroxyacyl-Coenzyme A dehydrogenase type II                                          | -1.13 | 0.238 | -1.12 | 0.062 | -1.08 | 0.655 | -1.11 | 0.666 | -1.11 |
| 1417474_at   | 1500035H01Rik      | RIKEN cDNA 1500035H01 gene                                                            | -1    | 0.88  | -1.14 | 0.259 | -1.2  | 0.277 | -1.3  | 0.032 | -1.16 |
| 1460581_a_at | Rpl13 /// LOC28004 | ribosomal protein L13 /// similar to 60S ribosomal protein L13 /// similar to 60S rib | -1.05 | 0.412 | -1.06 | 0.663 | -1.23 | 0.042 | -1.3  | 0.07  | -1.16 |
| 1443762_s_at | Sbf2               | SET binding factor 2                                                                  | -1.08 | 0.526 | -1.09 | 0.535 | -1.16 | 0.253 | -1.11 | 0.527 | -1.11 |
| 1426845_at   | Pdcd2l             | programmed cell death 2-like                                                          | -1.13 | 0.273 | -1.19 | 0.028 | -1.02 | 0.866 | -1.28 | 0.095 | -1.15 |
| 1424105_a_at | Pttg1              | pituitary tumor-transforming 1                                                        | -1.11 | 0.229 | -1.23 | 0.035 | -1.01 | 0.94  | -1.01 | 0.946 | -1.09 |
| 1433927_at   | Usp1               | ubiquitin specific peptidase like 1                                                   | -1.03 | 0.731 | -1.08 | 0.401 | -1.24 | 0.178 | -1.29 | 0.019 | -1.16 |
| 1453929_at   | Rnf24              | ring finger protein 24                                                                | -1.27 | 0.417 | -1.07 | 0.708 | -1.01 | 0.807 | -1.03 | 0.616 | -1.1  |
| 1423793_at   | D2Ert391e          | DNA segment, Chr 2, ERATO Doi 391, expressed                                          | -1.05 | 0.564 | -1.31 | 0.183 | -1.01 | 0.964 | -1.17 | 0.481 | -1.13 |
| 1451076_s_at | Ga17               | dendritic cell protein GA17                                                           | -1.07 | 0.604 | -1.12 | 0.017 | -1.14 | 0.068 | -1.38 | 0.112 | -1.18 |
| 1415699_a_at | Gps1               | G protein pathway suppressor 1                                                        | -1.01 | 0.934 | -1.08 | 0.013 | -1.26 | 0.047 | -1.13 | 0.148 | -1.12 |
| 1442098_at   | AU022434           | expressed sequence AU022434                                                           | -1.17 | 0.364 | -1.14 | 0.225 | -1.02 | 0.863 | -1.83 | 0.089 | -1.29 |
| 1426084_a_at | Tor1aip1           | torsin A interacting protein 1                                                        | -1.11 | 0.061 | -1.19 | 0.122 | -1.03 | 0.633 | -1.29 | 0.25  | -1.16 |
| 1419308_at   | Invs               | inversin                                                                              | -1.09 | 0.264 | -1.25 | 0.061 | -1.01 | 0.966 | -1.62 | 0.13  | -1.24 |
| 1437210_a_at | Brd2               | bromodomain containing 2                                                              | -1    | 0.987 | -1.23 | 0.136 | -1.11 | 0.685 | -1.14 | 0.443 | -1.12 |

|              |                    |                                                                                         |       |       |       |       |       |       |       |       |       |
|--------------|--------------------|-----------------------------------------------------------------------------------------|-------|-------|-------|-------|-------|-------|-------|-------|-------|
| 1445747_at   | ---                | 15 days embryo male testis cDNA, RIKEN full-length enriched library, clone:8030         | -1.18 | 0.5   | -1    | 0.998 | -1.16 | 0.47  | -1.36 | 0.307 | -1.17 |
| 1457432_at   | Prox1              | prospero-related homeobox 1                                                             | -1.09 | 0.796 | -1.05 | 0.588 | -1.2  | 0.189 | -1.33 | 0.237 | -1.16 |
| 1422451_at   | Mrps21             | mitochondrial ribosomal protein S21                                                     | -1.04 | 0.534 | -1.12 | 0.143 | -1.17 | 0.168 | -1.25 | 0.275 | -1.14 |
| 1427878_at   | 0610010O12Rik      | RIKEN cDNA 0610010O12 gene                                                              | -1.15 | 0.189 | -1.02 | 0.881 | -1.15 | 0.254 | -1.21 | 0.52  | -1.14 |
| 1432263_a_at | Cox7a2l            | cytochrome c oxidase subunit VIIa polypeptide 2-like                                    | -1.12 | 0.048 | -1.12 | 0.093 | -1.08 | 0.645 | -1.96 | 0.131 | -1.32 |
| 1440830_at   | Gpr116             | G protein-coupled receptor 116                                                          | -1.01 | 0.948 | -1.01 | 0.864 | -1.37 | 0.104 | -1.32 | 0.382 | -1.18 |
| 1451146_at   | Zfp386 /// LOC6765 | zinc finger protein 386 (Kruppel-like) /// similar to zinc finger protein 386 (Kruppel- | -1.14 | 0.389 | -1.14 | 0.33  | -1.04 | 0.835 | -1.93 | 0.041 | -1.31 |
| 1423989_at   | 2210010N04Rik      | RIKEN cDNA 2210010N04 gene                                                              | -1.02 | 0.916 | -1.25 | 0.417 | -1.08 | 0.687 | -2.4  | 0.071 | -1.44 |
| 1455227_at   | Aadacl1            | arylacetamide deacetylase-like 1                                                        | -1.04 | 0.486 | -1.29 | 0.178 | -1.02 | 0.889 | -1.13 | 0.668 | -1.12 |
| 1448398_s_at | Rpl22              | ribosomal protein L22                                                                   | -1.14 | 0.57  | -1.04 | 0.793 | -1.15 | 0.306 | -1.38 | 0.159 | -1.18 |
| 1448493_at   | Paip2              | polyadenylate-binding protein-interacting protein 2                                     | -1.04 | 0.695 | -1.08 | 0.184 | -1.21 | 0.093 | -1.25 | 0.181 | -1.15 |
| 1452075_at   | 4933435A13Rik      | RIKEN cDNA 4933435A13 gene                                                              | -1.17 | 0.295 | -1.11 | 0.532 | -1.05 | 0.773 | -1.02 | 0.823 | -1.09 |
| 1422471_at   | Pex13              | peroxisomal biogenesis factor 13                                                        | -1.1  | 0.01  | -1.14 | 0.135 | -1.09 | 0.484 | -1.17 | 0.347 | -1.12 |
| 1424005_at   | B230219D22Rik      | RIKEN cDNA B230219D22 gene                                                              | -1.02 | 0.644 | -1.14 | 0.109 | -1.17 | 0.388 | -1.04 | 0.76  | -1.09 |
| 1426830_a_at | Ahcyl1             | S-adenosylhomocysteine hydrolase-like 1                                                 | -1.02 | 0.875 | -1.04 | 0.176 | -1.3  | 0.071 | -1.1  | 0.493 | -1.11 |
| 1417885_at   | Mapt               | microtubule-associated protein tau                                                      | -1.07 | 0.781 | -1.15 | 0.751 | -1.1  | 0.264 | -2.25 | 0.478 | -1.39 |
| 1439841_at   | Zfyve27            | zinc finger, FYVE domain containing 27                                                  | -1.22 | 0.288 | -1.08 | 0.805 | -1.03 | 0.879 | -1.08 | 0.729 | -1.1  |
| 1421212_at   | Abcc6              | ATP-binding cassette, sub-family C (CFTR/MRP), member 6                                 | -1.01 | 0.954 | -1.13 | 0.416 | -1.2  | 0.111 | -1.15 | 0.686 | -1.12 |
| 1451294_s_at | Snrpe              | small nuclear ribonucleoprotein E                                                       | -1.03 | 0.728 | -1.1  | 0.175 | -1.2  | 0.214 | -1.2  | 0.17  | -1.13 |
| 1418516_at   | Mtf2               | metal response element binding transcription factor 2                                   | -1.05 | 0.767 | -1.17 | 0.227 | -1.11 | 0.362 | -1.29 | 0.227 | -1.15 |
| 1417113_at   | Gmcl1              | germ cell-less homolog 1 (Drosophila)                                                   | -1.1  | 0.061 | -1.07 | 0.412 | -1.16 | 0.039 | -1.27 | 0.205 | -1.15 |
| 1428215_x_at | Tomm7              | translocase of outer mitochondrial membrane 7 homolog (yeast)                           | -1.03 | 0.713 | -1.08 | 0.351 | -1.22 | 0.137 | -1.29 | 0.304 | -1.16 |
| 1457674_at   | Vps13a             | vacuolar protein sorting 13A (yeast)                                                    | -1.25 | 0.289 | -1.02 | 0.947 | -1.08 | 0.582 | -1.43 | 0.004 | -1.19 |
| 1424463_at   | 2210010L05Rik      | RIKEN cDNA 2210010L05 gene                                                              | -1.03 | 0.554 | -1.11 | 0.699 | -1.2  | 0.016 | -1.24 | 0.186 | -1.14 |
| 1459433_at   | C130051F05Rik      | RIKEN cDNA C130051F05 gene                                                              | -1.06 | 0.847 | -1.02 | 0.891 | -1.27 | 0.159 | -1.68 | 0.056 | -1.26 |
| 1416439_at   | 2410015N17Rik      | RIKEN cDNA 2410015N17 gene                                                              | -1.1  | 0.682 | -1.15 | 0.333 | -1.07 | 0.741 | -1.28 | 0.5   | -1.15 |
| 1449386_at   | Hsd17b9            | hydroxysteroid (17-beta) dehydrogenase 9                                                | -1.07 | 0.938 | -1.15 | 0.703 | -1.1  | 0.504 | -2.08 | 0.25  | -1.35 |
| 1430417_s_at | 0610025P10Rik      | RIKEN cDNA 0610025P10 gene                                                              | -1.02 | 0.782 | -1.14 | 0.318 | -1.17 | 0.267 | -1.1  | 0.616 | -1.11 |
| 1433570_s_at | Mak10              | MAK10 homolog, amino-acid N-acetyltransferase subunit, (S. cerevisiae)                  | -1.06 | 0.751 | -1.27 | 0.03  | -1.02 | 0.904 | -1.14 | 0.384 | -1.12 |
| 1416762_at   | S100a10            | S100 calcium binding protein A10 (calpactin)                                            | -1.02 | 0.638 | -1.09 | 0.425 | -1.24 | 0.046 | -1.57 | 0.302 | -1.23 |
| 1434344_at   | Gpkow              | G patch domain and KOW motifs                                                           | -1.13 | 0.268 | -1.17 | 0.01  | -1.03 | 0.473 | -1.07 | 0.557 | -1.1  |
| 1426820_at   | 2610507B11Rik      | RIKEN cDNA 2610507B11 gene                                                              | -1.01 | 0.728 | -1.23 | 0.08  | -1.1  | 0.406 | -1.23 | 0.138 | -1.14 |
| 1455153_at   | Zfp236             | zinc finger protein 236                                                                 | -1.11 | 0.435 | -1.21 | 0.117 | -1.02 | 0.859 | -1.31 | 0.092 | -1.16 |
| 1416465_a_at | Vapa               | vesicle-associated membrane protein, associated protein A                               | -1.04 | 0.801 | -1.29 | 0.037 | -1.03 | 0.791 | -1.13 | 0.291 | -1.12 |
| 1422613_a_at | Rpl7a              | ribosomal protein L7a                                                                   | -1.08 | 0.146 | -1.1  | 0.204 | -1.14 | 0.088 | -1.29 | 0.002 | -1.15 |
| 1433464_at   | Ipo13              | importin 13                                                                             | -1.12 | 0.248 | -1.13 | 0.224 | -1.07 | 0.662 | -1.17 | 0.2   | -1.12 |
| 1426724_at   | Cnn3               | calponin 3, acidic                                                                      | -1.03 | 0.606 | -1.08 | 0.531 | -1.22 | 0.225 | -2.32 | 0.04  | -1.41 |
| 1453032_at   | 2610109B12Rik      | RIKEN cDNA 2610109B12 gene                                                              | -1.04 | 0.412 | -1.02 | 0.744 | -1.29 | 0.012 | -1.18 | 0.024 | -1.13 |
| 1416171_at   | 2310037I24Rik      | RIKEN cDNA 2310037I24 gene                                                              | -1.03 | 0.759 | -1.15 | 0.224 | -1.14 | 0.377 | -1.26 | 0.013 | -1.15 |
| 1447483_s_at | 2610002F03Rik      | RIKEN cDNA 2610002F03 gene                                                              | -1.02 | 0.898 | -1.27 | 0.392 | -1.05 | 0.642 | -1    | 0.993 | -1.09 |
| 1427898_at   | Rnf6               | ring finger protein (C3H2C3 type) 6                                                     | -1.05 | 0.413 | -1.08 | 0.452 | -1.2  | 0.156 | -1.17 | 0.034 | -1.12 |
| 1437657_at   | Zfp291             | zinc finger protein 291                                                                 | -1.03 | 0.917 | -1.15 | 0.675 | -1.14 | 0.598 | -1.48 | 0.283 | -1.2  |
| 1417590_at   | Cyp27a1            | cytochrome P450, family 27, subfamily a, polypeptide 1                                  | -1.01 | 0.946 | -1.21 | 0.174 | -1.11 | 0.637 | -2.13 | 0.123 | -1.36 |
| 1424706_at   | Zfp51              | zinc finger protein 51                                                                  | -1.11 | 0.683 | -1.1  | 0.476 | -1.1  | 0.469 | -1.73 | 0.083 | -1.26 |
| 1453729_a_at | Rpl37              | ribosomal protein L37                                                                   | -1.06 | 0.076 | -1    | 0.906 | -1.29 | 0.018 | -1.22 | 0.012 | -1.14 |
| 1428449_at   | Gtf3c2             | general transcription factor IIIC, polypeptide 2, beta                                  | -1.14 | 0.312 | -1.13 | 0.417 | -1.05 | 0.806 | -1.03 | 0.93  | -1.09 |
| 1448921_a_at | Mrps9              | mitochondrial ribosomal protein S9                                                      | -1.1  | 0.643 | -1.11 | 0.526 | -1.1  | 0.031 | -1.14 | 0.191 | -1.11 |
| 1451388_a_at | Atp11b             | ATPase, Class VI, type 11B                                                              | -1.06 | 0.574 | -1.22 | 0.276 | -1.05 | 0.696 | -1.02 | 0.909 | -1.09 |
| 1443089_at   | 4930506C02Rik      | RIKEN cDNA 4930506C02 gene                                                              | -1.02 | 0.919 | -1.32 | 0.27  | -1.02 | 0.974 | -1.46 | 0.365 | -1.21 |
| 1443453_at   | Zfp651             | zinc finger protein 651                                                                 | -1    | 0.994 | -1.13 | 0.876 | -1.19 | 0.649 | -1.56 | 0.396 | -1.22 |
| 1451096_at   | Ndufs2             | NADH dehydrogenase (ubiquinone) Fe-S protein 2                                          | -1.11 | 0.401 | -1.16 | 0.234 | -1.05 | 0.734 | -1.43 | 0.068 | -1.19 |
| 1436936_s_at | Xist               | inactive X specific transcripts                                                         | -1.05 | 0.792 | -1.15 | 0.26  | -1.12 | 0.425 | -1.07 | 0.615 | -1.1  |
| 1424782_at   | Tmem77             | transmembrane protein 77                                                                | -1.13 | 0.364 | -1.03 | 0.613 | -1.16 | 0.036 | -1.28 | 0.102 | -1.15 |

|              |                    |                                                                                         |       |       |       |       |       |       |       |       |       |
|--------------|--------------------|-----------------------------------------------------------------------------------------|-------|-------|-------|-------|-------|-------|-------|-------|-------|
| 1451905_a_at | Mx1                | myxovirus (influenza virus) resistance 1                                                | -1.13 | 0.737 | -1.02 | 0.965 | -1.18 | 0.523 | -2.34 | 0.147 | -1.42 |
| 1452701_x_at | Uba52 /// LOC6665  | ubiquitin A-52 residue ribosomal protein fusion product 1 /// similar to ubiquitin A-   | -1.07 | 0.049 | -1.04 | 0.723 | -1.21 | 0.024 | -1.28 | 0.017 | -1.15 |
| 1450601_at   | V1rb8              | vomeroneasal 1 receptor, B8                                                             | -1.14 | 0.519 | -1.05 | 0.902 | -1.13 | 0.854 | -1.19 | 0.766 | -1.13 |
| 1424218_a_at | Creb3l4            | cAMP responsive element binding protein 3-like 4                                        | -1.02 | 0.967 | -1.24 | 0.56  | -1.07 | 0.895 | -1.95 | 0.443 | -1.32 |
| 1433550_at   | Chfr               | checkpoint with forkhead and ring finger domains                                        | -1.27 | 0.149 | -1.04 | 0.481 | -1.03 | 0.726 | -1.14 | 0.125 | -1.12 |
| 1429043_at   | Smndc1             | survival motor neuron domain containing 1                                               | -1.17 | 0.275 | -1.08 | 0.453 | -1.06 | 0.554 | -1.11 | 0.422 | -1.11 |
| 1422608_at   | Arpp19 /// 2700024 | cAMP-regulated phosphoprotein 19 /// RIKEN cDNA 2700024H10 gene                         | -1.03 | 0.753 | -1.01 | 0.902 | -1.33 | 0.205 | -1.04 | 0.804 | -1.1  |
| 1428709_a_at | Mrpl24             | mitochondrial ribosomal protein L24                                                     | -1.12 | 0.133 | -1.16 | 0.002 | -1.04 | 0.598 | -1.63 | 0.073 | -1.24 |
| 1435171_at   | 2810416G20Rik      | RIKEN cDNA 2810416G20 gene                                                              | -1.16 | 0.413 | -1.08 | 0.751 | -1.07 | 0.76  | -1.27 | 0.113 | -1.15 |
| 1422601_at   | Serpinb9           | serine (or cysteine) peptidase inhibitor, clade B, member 9                             | -1.01 | 0.956 | -1.1  | 0.418 | -1.22 | 0.006 | -1.05 | 0.428 | -1.1  |
| 1415841_at   | Dync1i2            | dynein cytoplasmic 1 intermediate chain 2                                               | -1.03 | 0.817 | -1.08 | 0.355 | -1.21 | 0.012 | -1.12 | 0.074 | -1.11 |
| 1451302_at   | 1110012L19Rik      | RIKEN cDNA 1110012L19 gene                                                              | -1.07 | 0.666 | -1.04 | 0.711 | -1.22 | 0.234 | -1.12 | 0.568 | -1.11 |
| 1415711_at   | Arfgef1            | ADP-ribosylation factor guanine nucleotide-exchange factor 1(brefeldin A-inhibite       | -1.11 | 0.342 | -1.09 | 0.195 | -1.1  | 0.406 | -1.28 | 0.119 | -1.15 |
| 1416447_at   | Tmem30a            | transmembrane protein 30A                                                               | -1.09 | 0.499 | -1.16 | 0.446 | -1.07 | 0.655 | -1.37 | 0.149 | -1.17 |
| 1430171_at   | Fibp               | fibroblast growth factor (acidic) intracellular binding protein                         | -1.15 | 0.478 | -1.05 | 0.66  | -1.12 | 0.52  | -1.4  | 0.22  | -1.18 |
| 1457304_at   | D13ErtD787e        | DNA segment, Chr 13, ERATO Doi 787, expressed                                           | -1.06 | 0.902 | -1.02 | 0.932 | -1.26 | 0.468 | -1.52 | 0.122 | -1.21 |
| 1428327_at   | Trak1              | trafficking protein, kinesin binding 1                                                  | -1.11 | 0.672 | -1.18 | 0.345 | -1.03 | 0.859 | -1.14 | 0.392 | -1.12 |
| 1434127_a_at | H3f3a /// LOC5449  | H3 histone, family 3A /// similar to H3 histone, family 3B /// similar to H3 histone, f | -1.06 | 0.701 | -1.05 | 0.334 | -1.21 | 0.043 | -1.12 | 0.152 | -1.11 |
| 1426290_at   | Dimt1              | DIM1 dimethyladenosine transferase 1-like (S. cerevisiae)                               | -1.18 | 0.422 | -1.07 | 0.829 | -1.06 | 0.532 | -1.13 | 0.498 | -1.11 |
| 1436079_s_at | Vapb               | vesicle-associated membrane protein, associated protein B and C                         | -1.04 | 0.881 | -1.11 | 0.235 | -1.16 | 0.292 | -1.33 | 0.389 | -1.16 |
| 1425781_a_at | Plcb1              | phospholipase C, beta 1                                                                 | -1.15 | 0.476 | -1.13 | 0.372 | -1.04 | 0.875 | -1.21 | 0.323 | -1.13 |
| 1455662_x_at | Rps17              | ribosomal protein S17                                                                   | -1.11 | 0.123 | -1.01 | 0.802 | -1.2  | 0.017 | -1.31 | 0.003 | -1.16 |
| 1444167_at   | ---                | Transcribed locus                                                                       | -1.15 | 0.432 | -1.16 | 0.64  | -1.01 | 0.945 | -1.07 | 0.678 | -1.1  |
| 1455429_at   | Al450540           | expressed sequence Al450540                                                             | -1.01 | 0.939 | -1.15 | 0.407 | -1.16 | 0.199 | -1.26 | 0.021 | -1.15 |
| 1444507_at   | Usp53              | ubiquitin specific peptidase 53                                                         | -1.09 | 0.553 | -1.04 | 0.814 | -1.18 | 0.204 | -1.82 | 0.112 | -1.28 |
| 1418564_s_at | Serbp1             | Serpine1 mRNA binding protein 1                                                         | -1.06 | 0.276 | -1.05 | 0.262 | -1.22 | 0.104 | -1.1  | 0.356 | -1.1  |
| 1429436_at   | Prpf40a            | PRP40 pre-mRNA processing factor 40 homolog A (yeast)                                   | -1.02 | 0.712 | -1.03 | 0.795 | -1.29 | 0.082 | -1.08 | 0.718 | -1.11 |
| 1418501_a_at | Oxr1               | oxidation resistance 1                                                                  | -1.05 | 0.604 | -1.08 | 0.106 | -1.19 | 0.129 | -1.14 | 0.456 | -1.11 |
| 1433723_s_at | Serf2              | small EDRK-rich factor 2                                                                | -1.15 | 0.236 | -1.09 | 0.02  | -1.06 | 0.542 | -1.37 | 0.04  | -1.17 |
| 1453207_at   | 2900053A13Rik      | RIKEN cDNA 2900053A13 gene                                                              | -1.08 | 0.462 | -1.02 | 0.786 | -1.23 | 0.331 | -1.05 | 0.802 | -1.09 |
| 1433603_at   | Ndufs6             | NADH dehydrogenase (ubiquinone) Fe-S protein 6                                          | -1.08 | 0.376 | -1.1  | 0.211 | -1.13 | 0.328 | -1.05 | 0.816 | -1.09 |
| 1416372_at   | Ptdss1             | phosphatidylserine synthase 1                                                           | -1.02 | 0.391 | -1.09 | 0.48  | -1.2  | 0.033 | -1.06 | 0.343 | -1.1  |
| 1419013_at   | Gpatc1             | G patch domain containing 1                                                             | -1.18 | 0.293 | -1.05 | 0.445 | -1.08 | 0.629 | -1.04 | 0.777 | -1.09 |
| 1438386_x_at | Mat2a              | methionine adenosyltransferase II, alpha                                                | -1.02 | 0.94  | -1.07 | 0.681 | -1.23 | 0.125 | -1.18 | 0.136 | -1.13 |
| 1416344_at   | Lamp2              | lysosomal membrane glycoprotein 2                                                       | -1.07 | 0.43  | -1.03 | 0.484 | -1.22 | 0.086 | -1.03 | 0.829 | -1.09 |
| 1450444_a_at | Nr1h3              | nuclear receptor subfamily 1, group H, member 3                                         | -1.08 | 0.523 | -1.01 | 0.884 | -1.23 | 0.127 | -1.04 | 0.891 | -1.09 |
| 1451135_at   | Gtf2b              | general transcription factor IIB                                                        | -1.2  | 0.015 | -1.03 | 0.708 | -1.09 | 0.426 | -1.27 | 0.075 | -1.15 |
| 1436967_at   | Ankrd11            | ankyrin repeat domain 11                                                                | -1.07 | 0.454 | -1.07 | 0.597 | -1.17 | 0.55  | -1.43 | 0.299 | -1.18 |
| 1449973_a_at | Pelp1              | proline, glutamic acid and leucine rich protein 1                                       | -1.31 | 0.463 | -1.04 | 0.948 | -1    | 0.991 | -1.77 | 0.311 | -1.28 |
| 1431544_at   | 4930524B17Rik      | RIKEN cDNA 4930524B17 gene                                                              | -1.15 | 0.837 | -1.04 | 0.932 | -1.12 | 0.664 | -1.26 | 0.232 | -1.14 |
| 1455500_at   | D11ErtD759e /// LO | DNA segment, Chr 11, ERATO Doi 759, expressed /// similar to chromosome 17              | -1.09 | 0.629 | -1.11 | 0.28  | -1.11 | 0.59  | -1.27 | 0.318 | -1.14 |
| 1431428_a_at | Nosip              | nitric oxide synthase interacting protein                                               | -1.01 | 0.934 | -1.15 | 0.282 | -1.16 | 0.213 | -1.11 | 0.66  | -1.11 |
| 1425354_a_at | Aggf1              | angiogenic factor with G patch and FHA domains 1                                        | -1.04 | 0.776 | -1.03 | 0.723 | -1.26 | 0.016 | -1.04 | 0.775 | -1.09 |
| 1418715_at   | Pank1              | pantothenate kinase 1                                                                   | -1.05 | 0.87  | -1.04 | 0.752 | -1.24 | 0.091 | -1.06 | 0.412 | -1.1  |
| 1432444_a_at | 1810011O16Rik      | RIKEN cDNA 1810011O16 gene                                                              | -1.01 | 0.916 | -1.21 | 0.026 | -1.09 | 0.477 | -1.33 | 0.281 | -1.16 |
| 1417075_at   | 2010309E21Rik      | RIKEN cDNA 2010309E21 gene                                                              | -1.08 | 0.545 | -1.04 | 0.493 | -1.2  | 0.312 | -1.04 | 0.815 | -1.09 |
| 1416356_at   | Gmpr2              | guanosine monophosphate reductase 2                                                     | -1.07 | 0.245 | -1.11 | 0.141 | -1.12 | 0.317 | -1.21 | 0.028 | -1.13 |
| 1433537_at   | 4833408C14Rik      | RIKEN cDNA 4833408C14 gene                                                              | -1.02 | 0.94  | -1.01 | 0.881 | -1.33 | 0.024 | -1.12 | 0.661 | -1.12 |
| 1425266_a_at | Rap1gds1           | RAP1, GTP-GDP dissociation stimulator 1                                                 | -1.05 | 0.477 | -1.16 | 0.285 | -1.1  | 0.488 | -1.43 | 0.248 | -1.18 |
| 1454301_at   | 2900073C17Rik      | RIKEN cDNA 2900073C17 gene                                                              | -1.03 | 0.964 | -1.13 | 0.811 | -1.16 | 0.803 | -2.17 | 0.074 | -1.37 |
| 1447388_at   | 5830484A20Rik      | RIKEN cDNA 5830484A20 gene                                                              | -1.15 | 0.804 | -1.1  | 0.864 | -1.05 | 0.893 | -1.01 | 0.972 | -1.08 |
| 1422994_at   | Pip5k3             | phosphatidylinositol-3-phosphate/phosphatidylinositol 5-kinase, type III                | -1.21 | 0.55  | -1.08 | 0.881 | -1.03 | 0.919 | -2.24 | 0.032 | -1.39 |
| 1418319_at   | 1810047C23Rik      | RIKEN cDNA 1810047C23 gene                                                              | -1.09 | 0.446 | -1.08 | 0.04  | -1.14 | 0.366 | -1.21 | 0.066 | -1.13 |

|              |                   |                                                                                       |       |       |       |       |       |       |       |       |       |
|--------------|-------------------|---------------------------------------------------------------------------------------|-------|-------|-------|-------|-------|-------|-------|-------|-------|
| 1429421_at   | 2610203E10Rik     | RIKEN cDNA 2610203E10 gene                                                            | -1.14 | 0.588 | -1.17 | 0.525 | -1.01 | 0.957 | -1.05 | 0.809 | -1.09 |
| 1460578_at   | Fgd5              | FYVE, RhoGEF and PH domain containing 5                                               | -1.18 | 0.433 | -1.05 | 0.827 | -1.08 | 0.494 | -1.07 | 0.592 | -1.1  |
| 1455693_x_at | Rps6 /// LOC43440 | ribosomal protein S6 /// similar to 40S ribosomal protein S6 /// similar to 40S ribos | -1.04 | 0.753 | -1.07 | 0.561 | -1.21 | 0.014 | -1.28 | 0.006 | -1.15 |
| 1415688_at   | Ube2g1            | ubiquitin-conjugating enzyme E2G 1 (UBC7 homolog, C. elegans)                         | -1.12 | 0.297 | -1.14 | 0.076 | -1.05 | 0.343 | -1.02 | 0.781 | -1.08 |
| 1427074_at   | Pcmt2             | protein-L-isoaspartate (D-aspartate) O-methyltransferase domain containing 2          | -1.18 | 0.416 | -1.07 | 0.345 | -1.06 | 0.644 | -1.03 | 0.821 | -1.09 |
| 1452583_s_at | Galm              | galactose mutarotase                                                                  | -1.13 | 0.132 | -1.17 | 0.43  | -1.02 | 0.92  | -1.61 | 0.196 | -1.23 |
| 1452249_at   | Prickle1          | prickle like 1 (Drosophila)                                                           | -1.06 | 0.171 | -1.05 | 0.725 | -1.2  | 0.546 | -1.2  | 0.247 | -1.13 |
| 1450858_a_at | Ube2d3            | ubiquitin-conjugating enzyme E2D 3 (UBC4/5 homolog, yeast)                            | -1.06 | 0.438 | -1.15 | 0.001 | -1.09 | 0.321 | -1.16 | 0.201 | -1.11 |
| 1426513_at   | Rbm28             | RNA binding motif protein 28                                                          | -1    | 0.972 | -1.13 | 0.326 | -1.18 | 0.556 | -1.2  | 0.493 | -1.13 |
| 1436187_at   | 1110054M08Rik     | RIKEN cDNA 1110054M08 gene                                                            | -1.11 | 0.37  | -1.18 | 0.101 | -1.03 | 0.844 | -1.45 | 0.305 | -1.19 |
| 1451645_at   | Fbs1              | fibrosin 1                                                                            | -1    | 0.989 | -1.37 | 0.017 | -1    | 0.968 | -1.38 | 0.017 | -1.19 |
| 1450921_at   | Aptx              | aprataxin                                                                             | -1.11 | 0.262 | -1.08 | 0.529 | -1.11 | 0.372 | -1.29 | 0.254 | -1.15 |
| 1448373_at   | Mrpl18            | mitochondrial ribosomal protein L18                                                   | -1.09 | 0.251 | -1.12 | 0.278 | -1.09 | 0.24  | -1.01 | 0.945 | -1.08 |
| 1432158_a_at | Trappc2           | trafficking protein particle complex 2                                                | -1.1  | 0.112 | -1.04 | 0.505 | -1.17 | 0.01  | -1.21 | 0.027 | -1.13 |
| 1417999_at   | Itm2b             | integral membrane protein 2B                                                          | -1.1  | 0.588 | -1.08 | 0.513 | -1.13 | 0.05  | -1.08 | 0.368 | -1.09 |
| 1419803_s_at | Ccdc12            | coiled-coil domain containing 12                                                      | -1.14 | 0.402 | -1.03 | 0.779 | -1.14 | 0.174 | -1.62 | 0.019 | -1.23 |
| 1451238_at   | 1200003C05Rik     | RIKEN cDNA 1200003C05 gene                                                            | -1.1  | 0.549 | -1.11 | 0.238 | -1.09 | 0.436 | -1.13 | 0.18  | -1.11 |
| 1436163_at   | Kcnj16            | potassium inwardly-rectifying channel, subfamily J, member 16                         | -1.03 | 0.74  | -1.26 | 0.255 | -1.04 | 0.777 | -1.29 | 0.564 | -1.15 |
| 1440044_at   | Ttf1              | Transcription termination factor 1                                                    | -1.06 | 0.657 | -1.28 | 0.432 | -1    | 0.988 | -1.36 | 0.486 | -1.17 |
| 1420668_a_at | Yipf2             | Yip1 domain family, member 2                                                          | -1.06 | 0.797 | -1.15 | 0.49  | -1.1  | 0.771 | -1.02 | 0.937 | -1.08 |
| 1422996_at   | Acot2             | acyl-CoA thioesterase 2                                                               | -1    | 0.995 | -1.14 | 0.809 | -1.17 | 0.538 | -1.12 | 0.672 | -1.11 |
| 1455283_x_at | Ndufs8            | NADH dehydrogenase (ubiquinone) Fe-S protein 8                                        | -1.05 | 0.636 | -1.07 | 0.23  | -1.2  | 0.056 | -1.04 | 0.691 | -1.09 |
| 1437013_x_at | Atp6v0b           | ATPase, H+ transporting, lysosomal V0 subunit B                                       | -1.02 | 0.853 | -1.19 | 0.052 | -1.1  | 0.477 | -1.29 | 0.025 | -1.15 |
| 1436153_a_at | Zmynd11           | zinc finger, MYND domain containing 11                                                | -1.13 | 0.518 | -1.08 | 0.421 | -1.09 | 0.674 | -2.18 | 0.161 | -1.37 |
| 1418255_s_at | Srf               | serum response factor                                                                 | -1.2  | 0.496 | -1.06 | 0.803 | -1.05 | 0.833 | -1.66 | 0.09  | -1.24 |
| 1455312_at   | Phc3              | polyhomeotic-like 3 (Drosophila)                                                      | -1.01 | 0.793 | -1.01 | 0.957 | -1.33 | 0.119 | -1.28 | 0.257 | -1.16 |
| 1452312_at   | 2810002D19Rik     | RIKEN cDNA 2810002D19 gene                                                            | -1.07 | 0.376 | -1.02 | 0.802 | -1.22 | 0.016 | -1.42 | 0.126 | -1.18 |
| 1455700_at   | Mterfd3           | MTERF domain containing 3                                                             | -1.12 | 0.717 | -1.05 | 0.856 | -1.14 | 0.428 | -2.11 | 0.11  | -1.35 |
| 1416095_x_at | 1110005A23Rik     | RIKEN cDNA 1110005A23 gene                                                            | -1.1  | 0.032 | -1.01 | 0.908 | -1.2  | 0.094 | -1.03 | 0.795 | -1.09 |
| 1419077_at   | Mpp3              | membrane protein, palmitoylated 3 (MAGUK p55 subfamily member 3)                      | -1.16 | 0.316 | -1.07 | 0.891 | -1.07 | 0.728 | -1.23 | 0.611 | -1.13 |
| 1423127_at   | Impa1             | inositol (myo)-1(or 4)-monophosphatase 1                                              | -1.03 | 0.713 | -1.13 | 0.028 | -1.15 | 0.155 | -1.15 | 0.251 | -1.11 |
| 1449014_at   | Lactb             | lactamase, beta                                                                       | -1.02 | 0.832 | -1.15 | 0.237 | -1.15 | 0.397 | -1.7  | 0.049 | -1.25 |
| 1433463_at   | 0610010K06Rik     | RIKEN cDNA 0610010K06 gene                                                            | -1.06 | 0.287 | -1.01 | 0.744 | -1.26 | 0.119 | -1.1  | 0.386 | -1.11 |
| 1424458_at   | Jmjd2c            | jumonji domain containing 2C                                                          | -1.16 | 0.48  | -1.01 | 0.91  | -1.15 | 0.291 | -1.27 | 0.192 | -1.15 |
| 1417002_at   | 0610012G03Rik     | RIKEN cDNA 0610012G03 gene                                                            | -1.08 | 0.452 | -1.2  | 0.046 | -1.03 | 0.708 | -1.06 | 0.503 | -1.09 |
| 1449444_a_at | Mfap1             | microfibrillar-associated protein 1                                                   | -1    | 0.978 | -1.2  | 0.181 | -1.11 | 0.113 | -1.13 | 0.45  | -1.11 |
| 1428954_at   | Slc9a3r2          | solute carrier family 9 (sodium/hydrogen exchanger), isoform 3 regulator 2            | -1.09 | 0.802 | -1.09 | 0.789 | -1.12 | 0.653 | -1.41 | 0.204 | -1.18 |
| 1424496_at   | 5133401N09Rik     | RIKEN cDNA 5133401N09 gene                                                            | -1.06 | 0.694 | -1.19 | 0.034 | -1.06 | 0.545 | -1.5  | 0.048 | -1.2  |
| 1435717_at   | 4833428C12Rik     | RIKEN cDNA 4833428C12 gene                                                            | -1.06 | 0.83  | -1.03 | 0.779 | -1.23 | 0.36  | -1.44 | 0.303 | -1.19 |
| 1451783_a_at | Kifap3            | kinesin-associated protein 3                                                          | -1.15 | 0.4   | -1.02 | 0.837 | -1.13 | 0.238 | -1.07 | 0.827 | -1.09 |
| 1437306_at   | C130092O11Rik     | RIKEN cDNA C130092O11 gene                                                            | -1.01 | 0.913 | -1.14 | 0.805 | -1.15 | 0.19  | -1.37 | 0.356 | -1.17 |
| 1428708_x_at | Ptms              | parathymosin                                                                          | -1.07 | 0.86  | -1.07 | 0.76  | -1.17 | 0.246 | -1.05 | 0.896 | -1.09 |
| 1427173_a_at | Mrps33            | mitochondrial ribosomal protein S33                                                   | -1.23 | 0.079 | -1.05 | 0.532 | -1.03 | 0.737 | -1.28 | 0.103 | -1.15 |
| 1450900_at   | AW011752          | expressed sequence AW011752                                                           | -1.01 | 0.884 | -1.09 | 0.491 | -1.21 | 0.182 | -1.34 | 0.056 | -1.16 |
| 1448762_at   | Rad17             | RAD17 homolog (S. pombe)                                                              | -1.27 | 0.311 | -1    | 0.96  | -1.06 | 0.695 | -1.25 | 0.104 | -1.15 |
| 1417344_at   | 2900064A13Rik     | RIKEN cDNA 2900064A13 gene                                                            | -1.06 | 0.121 | -1.03 | 0.634 | -1.23 | 0.006 | -1    | 0.976 | -1.08 |
| 1424104_at   | Syf2              | SYF2 homolog, RNA splicing factor (S. cerevisiae)                                     | -1.13 | 0.207 | -1.07 | 0.34  | -1.09 | 0.26  | -1.12 | 0.151 | -1.1  |
| 1442446_at   | Zfp523            | Zinc finger protein 523                                                               | -1.04 | 0.911 | -1.09 | 0.756 | -1.17 | 0.525 | -1.29 | 0.603 | -1.15 |
| 1451244_a_at | Zfp422            | zinc finger protein 422                                                               | -1.16 | 0.372 | -1.11 | 0.238 | -1.03 | 0.807 | -1.19 | 0.35  | -1.12 |
| 1424821_at   | Ndfip1            | Nedd4 family interacting protein 1                                                    | -1.07 | 0.414 | -1.14 | 0.123 | -1.09 | 0.343 | -1.34 | 0.344 | -1.16 |
| 1443203_at   | Zfx1a             | Zinc finger homeobox 1a                                                               | -1.05 | 0.949 | -1.05 | 0.796 | -1.22 | 0.053 | -1.07 | 0.701 | -1.1  |
| 1435757_a_at | Uqcrc2            | ubiquinol cytochrome c reductase core protein 2                                       | -1.05 | 0.245 | -1.11 | 0.357 | -1.14 | 0.152 | -1.43 | 0.216 | -1.18 |
| 1418100_at   | A030009H04Rik     | RIKEN cDNA A030009H04 gene                                                            | -1.11 | 0.378 | -1.16 | 0.847 | -1.03 | 0.898 | -1.13 | 0.657 | -1.11 |

|              |               |                                                                                    |       |       |       |       |       |       |       |       |       |
|--------------|---------------|------------------------------------------------------------------------------------|-------|-------|-------|-------|-------|-------|-------|-------|-------|
| 1448425_at   | Eif3s10       | eukaryotic translation initiation factor 3, subunit 10 (theta)                     | -1.02 | 0.925 | -1.1  | 0.121 | -1.19 | 0.297 | -1.02 | 0.782 | -1.08 |
| 1416277_a_at | Rplp1         | ribosomal protein, large, P1                                                       | -1.08 | 0.231 | -1.03 | 0.714 | -1.2  | 0.095 | -1.3  | 0.029 | -1.15 |
| 1455727_at   | U2af1-rs2     | U2 small nuclear ribonucleoprotein auxiliary factor (U2AF) 1, related sequence 2   | -1.08 | 0.525 | -1.05 | 0.715 | -1.17 | 0.238 | -1    | 0.998 | -1.08 |
| 1416280_at   | Uble1b        | ubiquitin-like 1 (sentrin) activating enzyme E1B                                   | -1.13 | 0.182 | -1.13 | 0.464 | -1.04 | 0.524 | -1.04 | 0.752 | -1.08 |
| 1423773_at   | Gbp1          | GC-rich promoter binding protein 1                                                 | -1.02 | 0.84  | -1.03 | 0.461 | -1.29 | 0.074 | -1.09 | 0.394 | -1.1  |
| 1419512_at   | Prpf40b       | PRP40 pre-mRNA processing factor 40 homolog B (yeast)                              | -1.06 | 0.781 | -1.04 | 0.693 | -1.21 | 0.34  | -1.51 | 0.173 | -1.2  |
| 1448799_s_at | Mrps12        | mitochondrial ribosomal protein S12                                                | -1.1  | 0.141 | -1.03 | 0.687 | -1.17 | 0.165 | -1.15 | 0.484 | -1.11 |
| 1427941_at   | Dicer1        | Dicer1, Dcr-1 homolog (Drosophila)                                                 | -1.11 | 0.798 | -1.11 | 0.642 | -1.08 | 0.662 | -1.16 | 0.628 | -1.11 |
| 1424241_at   | Slc30a6       | solute carrier family 30 (zinc transporter), member 6                              | -1.05 | 0.676 | -1.16 | 0.011 | -1.09 | 0.433 | -1.03 | 0.369 | -1.08 |
| 1420113_s_at | 2410022L05Rik | RIKEN cDNA 2410022L05 gene                                                         | -1    | 0.959 | -1    | 0.989 | -1.36 | 0.003 | -1.28 | 0.044 | -1.16 |
| 1435571_at   | A530065I17Rik | RIKEN cDNA A530065I17 gene                                                         | -1.04 | 0.921 | -1.2  | 0.265 | -1.07 | 0.745 | -1.02 | 0.872 | -1.08 |
| 1455291_s_at | Znrf2         | zinc and ring finger 2                                                             | -1.1  | 0.542 | -1.04 | 0.734 | -1.16 | 0.268 | -1.68 | 0.163 | -1.24 |
| 1434493_at   | 1810022K09Rik | RIKEN cDNA 1810022K09 gene                                                         | -1.01 | 0.964 | -1.28 | 0.063 | -1.04 | 0.572 | -1.63 | 0.146 | -1.24 |
| 1430992_s_at | 1500009M05Rik | RIKEN cDNA 1500009M05 gene                                                         | -1.16 | 0.189 | -1.04 | 0.684 | -1.1  | 0.755 | -1.1  | 0.689 | -1.1  |
| 1435680_a_at | Dpp7          | dipeptidylpeptidase 7                                                              | -1.17 | 0.228 | -1.02 | 0.932 | -1.12 | 0.374 | -1.27 | 0.13  | -1.14 |
| 1423707_at   | Tmem50b       | transmembrane protein 50B                                                          | -1.07 | 0.469 | -1.06 | 0.201 | -1.17 | 0.072 | -1.1  | 0.549 | -1.1  |
| 1455941_s_at | Map2k5        | mitogen activated protein kinase kinase 5                                          | -1    | 0.995 | -1.3  | 0.198 | -1.03 | 0.871 | -1.39 | 0.257 | -1.18 |
| 1429255_at   | 2010007H12Rik | RIKEN cDNA 2010007H12 gene                                                         | -1.07 | 0.682 | -1.05 | 0.708 | -1.18 | 0.312 | -1.24 | 0.441 | -1.14 |
| 1452451_at   | Bean          | brain expressed, associated with Nedd4                                             | -1.01 | 0.989 | -1.14 | 0.684 | -1.16 | 0.519 | -3.12 | 0.091 | -1.61 |
| 1427108_at   | 9530068E07Rik | RIKEN cDNA 9530068E07 gene                                                         | -1    | 0.946 | -1.26 | 0.008 | -1.06 | 0.661 | -1.18 | 0.226 | -1.13 |
| 1416858_a_at | Fkbp3         | FK506 binding protein 3                                                            | -1.11 | 0.284 | -1.04 | 0.735 | -1.15 | 0.136 | -1.65 | 0.065 | -1.24 |
| 1428619_at   | 2310005N03Rik | RIKEN cDNA 2310005N03 gene                                                         | -1.1  | 0.156 | -1    | 0.999 | -1.21 | 0.019 | -1.14 | 0.263 | -1.11 |
| 1423197_a_at | AW011752      | expressed sequence AW011752                                                        | -1    | 0.965 | -1.01 | 0.913 | -1.34 | 0.175 | -1.39 | 0.084 | -1.19 |
| 1452775_at   | Csrp2bp       | cysteine and glycine-rich protein 2 binding protein                                | -1.18 | 0.368 | -1.11 | 0.145 | -1.01 | 0.957 | -1.07 | 0.575 | -1.09 |
| 1452186_at   | Rbm5          | RNA binding motif protein 5                                                        | -1.23 | 0.154 | -1.05 | 0.628 | -1.03 | 0.852 | -1.41 | 0.171 | -1.18 |
| 1423131_at   | LOC433230     | similar to TGF beta-inducible nuclear protein 1 (L-name-related protein 42) (LNR4) | -1.05 | 0.33  | -1.11 | 0.509 | -1.12 | 0.222 | -1.45 | 0.157 | -1.19 |
| 1454863_at   | Ankrd11       | ankyrin repeat domain 11                                                           | -1.02 | 0.937 | -1.17 | 0.135 | -1.11 | 0.19  | -1.18 | 0.4   | -1.12 |
| 1455507_s_at | D8Ert587e     | DNA segment, Chr 8, ERATO Doi 587, expressed                                       | -1.01 | 0.929 | -1.03 | 0.635 | -1.28 | 0.152 | -1.34 | 0.329 | -1.17 |
| 1428539_at   | 2610207I05Rik | RIKEN cDNA 2610207I05 gene                                                         | -1.06 | 0.776 | -1.06 | 0.824 | -1.19 | 0.579 | -1.26 | 0.607 | -1.14 |
| 1425486_s_at | Mtmr6         | myotubularin related protein 6                                                     | -1.11 | 0.522 | -1.01 | 0.834 | -1.18 | 0.243 | -1.29 | 0.193 | -1.15 |
| 1424189_at   | Pigc          | phosphatidylinositol glycan anchor biosynthesis, class C                           | -1.07 | 0.416 | -1.1  | 0.384 | -1.12 | 0.202 | -1.28 | 0.037 | -1.14 |
| 1456194_a_at | Park7         | Parkinson disease (autosomal recessive, early onset) 7                             | -1.1  | 0.097 | -1.07 | 0.564 | -1.12 | 0.024 | -1.2  | 0.315 | -1.12 |
| 1456332_at   | Tmem17        | transmembrane protein 17                                                           | -1.03 | 0.963 | -1.28 | 0.136 | -1.02 | 0.929 | -1.57 | 0.492 | -1.22 |
| 1426087_at   | Icosl         | icos ligand                                                                        | -1.05 | 0.661 | -1.15 | 0.662 | -1.09 | 0.459 | -1.15 | 0.59  | -1.11 |
| 1436545_at   | Dtx4          | deltex 4 homolog (Drosophila)                                                      | -1.08 | 0.844 | -1.07 | 0.696 | -1.14 | 0.432 | -1.05 | 0.706 | -1.09 |
| 1445499_at   | Zc3h13        | zinc finger CCCH type containing 13                                                | -1.1  | 0.75  | -1.13 | 0.656 | -1.06 | 0.776 | -1.23 | 0.409 | -1.13 |
| 1448505_at   | C1d           | nuclear DNA binding protein                                                        | -1.15 | 0.099 | -1.07 | 0.338 | -1.07 | 0.645 | -1.05 | 0.444 | -1.08 |
| 1454772_at   | Ascc3l1       | activating signal cointegrator 1 complex subunit 3-like 1                          | -1.04 | 0.614 | -1.19 | 0.327 | -1.07 | 0.488 | -1.42 | 0.139 | -1.18 |
| 1428466_at   | Chd3          | chromodomain helicase DNA binding protein 3                                        | -1.13 | 0.441 | -1.07 | 0.688 | -1.09 | 0.669 | -1.41 | 0.162 | -1.17 |
| 1420631_a_at | Blcap         | bladder cancer associated protein homolog (human)                                  | -1.04 | 0.846 | -1.1  | 0.177 | -1.15 | 0.261 | -1.36 | 0.406 | -1.16 |
| 1450934_at   | Eif4a2        | eukaryotic translation initiation factor 4A2                                       | -1.04 | 0.415 | -1.14 | 0.017 | -1.11 | 0.307 | -1.45 | 0.22  | -1.19 |
| 1451223_a_at | Btf3l4        | basic transcription factor 3-like 4                                                | -1.06 | 0.698 | -1.06 | 0.325 | -1.17 | 0.374 | -1.18 | 0.194 | -1.12 |
| 1448251_at   | 9030425E11Rik | RIKEN cDNA 9030425E11 gene                                                         | -1.05 | 0.772 | -1.07 | 0.923 | -1.17 | 0.264 | -1.23 | 0.219 | -1.13 |
| 1460621_x_at | Ywhaq         | tyrosine 3-monooxygenase/tryptophan 5-monooxygenase activation protein, theta      | -1.03 | 0.656 | -1.08 | 0.163 | -1.18 | 0.044 | -1.18 | 0.316 | -1.12 |
| 1416911_a_at | 6330407G11Rik | RIKEN cDNA 6330407G11 gene                                                         | -1.21 | 0.526 | -1.03 | 0.874 | -1.06 | 0.664 | -1.32 | 0.094 | -1.16 |
| 1427212_at   | Mapkap1       | mitogen-activated protein kinase associated protein 1                              | -1.02 | 0.917 | -1.2  | 0.137 | -1.09 | 0.379 | -1.06 | 0.307 | -1.09 |
| 1419635_at   | 4833420G17Rik | RIKEN cDNA 4833420G17 gene                                                         | -1    | 0.974 | -1.25 | 0.331 | -1.06 | 0.539 | -1.57 | 0.003 | -1.22 |
| 1428218_a_at | 1600012H06Rik | RIKEN cDNA 1600012H06 gene                                                         | -1.03 | 0.829 | -1.13 | 0.391 | -1.12 | 0.453 | -1.21 | 0.213 | -1.12 |
| 1420530_at   | Neud4         | neuronal d4 domain family member                                                   | -1.07 | 0.908 | -1.01 | 0.984 | -1.23 | 0.516 | -1.15 | 0.016 | -1.11 |
| 1418223_at   | Sec11l1       | Sec11-like 1 (S. cerevisiae)                                                       | -1.13 | 0.501 | -1.05 | 0.468 | -1.1  | 0.329 | -1.14 | 0.098 | -1.11 |
| 1456873_at   | Clic5         | chloride intracellular channel 5                                                   | -1.04 | 0.728 | -1.12 | 0.858 | -1.13 | 0.531 | -1.63 | 0.13  | -1.23 |
| 1427132_at   | Sbf2          | SET binding factor 2                                                               | -1.09 | 0.477 | -1.05 | 0.487 | -1.15 | 0.639 | -1.01 | 0.947 | -1.08 |
| 1448697_s_at | Rpl36al       | ribosomal protein L36a-like                                                        | -1.03 | 0.606 | -1.04 | 0.611 | -1.24 | 0.02  | -1.44 | 0.028 | -1.19 |

|              |                   |                                                                                          |       |       |       |       |       |       |       |       |       |
|--------------|-------------------|------------------------------------------------------------------------------------------|-------|-------|-------|-------|-------|-------|-------|-------|-------|
| 1423043_s_at | Ddx3x             | DEAD/H (Asp-Glu-Ala-Asp/His) box polypeptide 3, X-linked                                 | -1.04 | 0.395 | -1.04 | 0.642 | -1.22 | 0.008 | -1.07 | 0.314 | -1.09 |
| 1433039_at   | 4930555B11Rik     | RIKEN cDNA 4930555B11 gene                                                               | -1.11 | 0.543 | -1.03 | 0.924 | -1.15 | 0.815 | -1.05 | 0.942 | -1.08 |
| 1450778_a_at | Rnuxa             | RNA U, small nuclear RNA export adaptor                                                  | -1.1  | 0.711 | -1.07 | 0.435 | -1.11 | 0.551 | -1.41 | 0.032 | -1.17 |
| 1428441_at   | 1500009M05Rik     | RIKEN cDNA 1500009M05 gene                                                               | -1.03 | 0.761 | -1.05 | 0.496 | -1.22 | 0     | -1.21 | 0.288 | -1.13 |
| 1417098_s_at | Mecr              | mitochondrial trans-2-enoyl-CoA reductase                                                | -1.15 | 0.597 | -1.1  | 0.083 | -1.03 | 0.845 | -1.03 | 0.863 | -1.08 |
| 1435900_at   | Zfp297b           | zinc finger protein 297B                                                                 | -1.11 | 0.338 | -1.03 | 0.82  | -1.15 | 0.134 | -1.2  | 0.021 | -1.12 |
| 1415701_x_at | Rpl23             | ribosomal protein L23                                                                    | -1.08 | 0.444 | -1.02 | 0.591 | -1.2  | 0.019 | -1.25 | 0.009 | -1.14 |
| 1425462_at   | Fbxw11            | F-box and WD-40 domain protein 11                                                        | -1.14 | 0.156 | -1.03 | 0.78  | -1.12 | 0.371 | -1.13 | 0.188 | -1.11 |
| 1438491_x_at | A530054K11Rik     | RIKEN cDNA A530054K11 gene                                                               | -1.11 | 0.326 | -1.03 | 0.93  | -1.15 | 0.688 | -1.73 | 0.267 | -1.25 |
| 1439452_x_at | Dnpep             | aspartyl aminopeptidase                                                                  | -1.21 | 0.19  | -1.08 | 0.19  | -1.01 | 0.962 | -1.09 | 0.262 | -1.1  |
| 1438983_x_at | Al413782          | expressed sequence Al413782                                                              | -1.11 | 0.481 | -1.08 | 0.076 | -1.08 | 0.15  | -1.46 | 0.133 | -1.19 |
| 1450818_a_at | Ndufa7            | NADH dehydrogenase (ubiquinone) 1 alpha subcomplex, 7 (B14.5a)                           | -1.07 | 0.474 | -1.09 | 0.287 | -1.12 | 0.46  | -1.16 | 0.34  | -1.11 |
| 1426219_at   | Scp2              | sterol carrier protein 2, liver                                                          | -1.03 | 0.64  | -1.27 | 0.221 | -1.02 | 0.9   | -1.33 | 0.076 | -1.16 |
| 1415736_at   | Pfdn5             | prefoldin 5                                                                              | -1.06 | 0.691 | -1.01 | 0.827 | -1.23 | 0.058 | -2.28 | 0.205 | -1.4  |
| 1448712_at   | Chm               | choroideremia                                                                            | -1.11 | 0.241 | -1.08 | 0.033 | -1.09 | 0.033 | -1.19 | 0.604 | -1.12 |
| 1436949_a_at | Tceb2 /// LOC6685 | transcription elongation factor B (SIII), polypeptide 2 /// similar to transcription elo | -1.01 | 0.877 | -1.05 | 0.13  | -1.25 | 0.056 | -1.09 | 0.638 | -1.1  |
| 1437005_a_at | Rpl18             | ribosomal protein L18                                                                    | -1    | 0.977 | -1.06 | 0.446 | -1.25 | 0.012 | -1.26 | 0.008 | -1.14 |
| 1418077_at   | Trim21            | tripartite motif protein 21                                                              | -1.14 | 0.528 | -1.09 | 0.552 | -1.05 | 0.628 | -1.43 | 0.209 | -1.18 |
| 1446371_at   | ---               | ---                                                                                      | -1.02 | 0.957 | -1.04 | 0.868 | -1.25 | 0.146 | -1.23 | 0.309 | -1.14 |
| 1448540_a_at | 0610012G03Rik /// | RIKEN cDNA 0610012G03 gene /// hypothetical protein LOC638521                            | -1.06 | 0.503 | -1.14 | 0.056 | -1.08 | 0.542 | -1.38 | 0.331 | -1.17 |
| 1436034_at   | Cep68             | centrosomal protein 68                                                                   | -1.09 | 0.428 | -1.09 | 0.571 | -1.1  | 0.087 | -1.43 | 0.097 | -1.18 |
| 1440500_at   | Map3k10           | Mitogen activated protein kinase kinase kinase 10                                        | -1.01 | 0.923 | -1.2  | 0.542 | -1.09 | 0.585 | -1.07 | 0.653 | -1.09 |
| 1445693_at   | Araf              | v-raf murine sarcoma 3611 viral oncogene homolog                                         | -1.09 | 0.713 | -1.02 | 0.917 | -1.19 | 0.397 | -1.13 | 0.632 | -1.11 |
| 1449956_at   | Prkce             | protein kinase C, epsilon                                                                | -1.17 | 0.37  | -1.04 | 0.783 | -1.07 | 0.479 | -1.3  | 0.119 | -1.15 |
| 1448763_at   | Atad1             | ATPase family, AAA domain containing 1                                                   | -1.11 | 0.038 | -1.08 | 0.23  | -1.09 | 0.242 | -1.22 | 0.147 | -1.13 |
| 1455976_x_at | Dbi               | diazepam binding inhibitor                                                               | -1.16 | 0.243 | -1.03 | 0.798 | -1.1  | 0.405 | -1.06 | 0.621 | -1.09 |
| 1434703_at   | Extl3             | exostoses (multiple)-like 3                                                              | -1.02 | 0.887 | -1.14 | 0.177 | -1.13 | 0.392 | -1.02 | 0.847 | -1.08 |
| 1459749_s_at | Fat4              | FAT tumor suppressor homolog 4 (Drosophila)                                              | -1.05 | 0.926 | -1.06 | 0.672 | -1.18 | 0.396 | -1.26 | 0.463 | -1.14 |
| 1434219_at   | Stim2             | stromal interaction molecule 2                                                           | -1.06 | 0.77  | -1.12 | 0.12  | -1.1  | 0.258 | -1.4  | 0.108 | -1.17 |
| 1425321_a_at | Clmn              | calmin                                                                                   | -1.08 | 0.603 | -1.16 | 0.411 | -1.05 | 0.772 | -1.57 | 0.164 | -1.21 |
| 1424355_a_at | Sin3b             | transcriptional regulator, SIN3B (yeast)                                                 | -1.11 | 0.341 | -1.17 | 0.192 | -1.01 | 0.926 | -1.22 | 0.124 | -1.13 |
| 1435862_at   | Son               | Son cell proliferation protein                                                           | -1.02 | 0.869 | -1.07 | 0.509 | -1.21 | 0.387 | -1.43 | 0.107 | -1.18 |
| 1417684_at   | Thumpd3           | THUMP domain containing 3                                                                | -1.1  | 0.17  | -1.09 | 0.354 | -1.09 | 0.53  | -1.21 | 0.141 | -1.12 |
| 1424277_at   | 1110020L19Rik     | RIKEN cDNA 1110020L19 gene                                                               | -1.14 | 0.66  | -1.13 | 0.661 | -1.02 | 0.749 | -1.08 | 0.673 | -1.09 |
| 1428303_at   | 1500005I02Rik     | RIKEN cDNA 1500005I02 gene                                                               | -1    | 0.997 | -1.14 | 0.865 | -1.15 | 0.73  | -1.32 | 0.728 | -1.15 |
| 1426978_at   | Klhl2             | kelch-like 2, Mayven (Drosophila)                                                        | -1.07 | 0.643 | -1.08 | 0.402 | -1.13 | 0.586 | -1.09 | 0.818 | -1.09 |
| 1449272_at   | Igsf4b            | immunoglobulin superfamily, member 4B                                                    | -1.03 | 0.969 | -1.06 | 0.913 | -1.2  | 0.609 | -1.18 | 0.686 | -1.12 |
| 1459227_at   | ---               | Transcribed locus                                                                        | -1.02 | 0.895 | -1.07 | 0.734 | -1.19 | 0.558 | -1.23 | 0.293 | -1.13 |
| 1417317_s_at | Rpl35a            | ribosomal protein L35a                                                                   | -1.03 | 0.304 | -1.01 | 0.83  | -1.27 | 0.001 | -1.42 | 0.016 | -1.18 |
| 1428465_at   | Tmem147           | transmembrane protein 147                                                                | -1.06 | 0.668 | -1.13 | 0.122 | -1.1  | 0.452 | -1.01 | 0.928 | -1.07 |
| 1439455_x_at | Capza1            | capping protein (actin filament) muscle Z-line, alpha 1                                  | -1.06 | 0.588 | -1.16 | 0.16  | -1.07 | 0.621 | -1.34 | 0.091 | -1.16 |
| 1415761_at   | Mrpl52            | mitochondrial ribosomal protein L52                                                      | -1.03 | 0.652 | -1.01 | 0.865 | -1.26 | 0.162 | -1.22 | 0.445 | -1.13 |
| 1426660_x_at | Rpl23a            | ribosomal protein L23a                                                                   | -1.02 | 0.679 | -1    | 0.914 | -1.3  | 0.006 | -1.28 | 0.005 | -1.15 |
| 1450889_at   | Smarca3           | SWI/SNF related, matrix associated, actin dependent regulator of chromatin, sub          | -1.1  | 0.48  | -1.13 | 0.292 | -1.05 | 0.671 | -1.75 | 0.064 | -1.26 |
| 1437773_x_at | Ddx17             | DEAD (Asp-Glu-Ala-Asp) box polypeptide 17                                                | -1.14 | 0.348 | -1.02 | 0.852 | -1.12 | 0.273 | -1.28 | 0.117 | -1.14 |
| 1437016_x_at | Rap2c             | RAP2C, member of RAS oncogene family                                                     | -1.12 | 0.703 | -1.15 | 0.344 | -1.02 | 0.78  | -1.09 | 0.711 | -1.09 |
| 1436272_at   | Rab3gap2          | RAB3 GTPase activating protein subunit 2                                                 | -1.15 | 0.062 | -1.01 | 0.979 | -1.13 | 0.384 | -1.02 | 0.769 | -1.08 |
| 1431614_at   | 2810049E08Rik     | RIKEN cDNA 2810049E08 gene                                                               | -1.06 | 0.835 | -1.03 | 0.87  | -1.2  | 0.32  | -1.2  | 0.36  | -1.12 |
| 1450031_at   | Aff4              | AF4/FMR2 family, member 4                                                                | -1.12 | 0.176 | -1.04 | 0.733 | -1.12 | 0.066 | -1.35 | 0.096 | -1.16 |
| 1426484_at   | Ubx2              | UBX domain containing 2                                                                  | -1.1  | 0.315 | -1.07 | 0.426 | -1.11 | 0.098 | -1.14 | 0.342 | -1.1  |
| 1426487_a_at | Rbbp6             | retinoblastoma binding protein 6                                                         | -1.08 | 0.689 | -1    | 0.985 | -1.21 | 0.144 | -1.33 | 0.041 | -1.16 |
| 1418134_at   | 1200007B05Rik     | RIKEN cDNA 1200007B05 gene                                                               | -1.08 | 0.648 | -1.16 | 0.047 | -1.04 | 0.736 | -1.02 | 0.889 | -1.08 |
| 1444433_at   | Auh               | AU RNA binding protein/enoyl-coenzyme A hydratase                                        | -1.07 | 0.742 | -1.12 | 0.564 | -1.09 | 0.529 | -1.02 | 0.913 | -1.07 |

|              |                   |                                                                                     |       |       |       |       |       |       |       |       |       |
|--------------|-------------------|-------------------------------------------------------------------------------------|-------|-------|-------|-------|-------|-------|-------|-------|-------|
| 1426968_a_at | Rdh10             | retinol dehydrogenase 10 (all-trans)                                                | -1.13 | 0.513 | -1.11 | 0.078 | -1.04 | 0.808 | -1.03 | 0.898 | -1.08 |
| 1422340_a_at | Actg2             | actin, gamma 2, smooth muscle, enteric                                              | -1.24 | 0.606 | -1.01 | 0.958 | -1.04 | 0.87  | -1.46 | 0.057 | -1.19 |
| 1418419_at   | Fbxl20            | F-box and leucine-rich repeat protein 20                                            | -1.15 | 0.189 | -1.1  | 0.012 | -1.03 | 0.58  | -1.16 | 0.393 | -1.11 |
| 1425262_at   | Cebpg             | CCAAT/enhancer binding protein (C/EBP), gamma                                       | -1.05 | 0.753 | -1.01 | 0.846 | -1.23 | 0.228 | -1.06 | 0.389 | -1.09 |
| 1451005_at   | Sumo1             | SMT3 suppressor of mif two 3 homolog 1 (yeast)                                      | -1.06 | 0.554 | -1.01 | 0.905 | -1.23 | 0.105 | -1.21 | 0.15  | -1.13 |
| 1452985_at   | Uaca              | uveal autoantigen with coiled-coil domains and ankyrin repeats                      | -1.05 | 0.75  | -1.11 | 0.572 | -1.11 | 0.722 | -1.05 | 0.912 | -1.08 |
| 1417526_at   | Pcbp3             | poly(rC) binding protein 3                                                          | -1.08 | 0.635 | -1.03 | 0.933 | -1.17 | 0.536 | -1.19 | 0.561 | -1.12 |
| 1434516_at   | Pstk              | phosphoseryl-tRNA kinase                                                            | -1.17 | 0.018 | -1.1  | 0.467 | -1.02 | 0.909 | -1.07 | 0.337 | -1.09 |
| 1438684_at   | Nuak1             | NUAK family, SNF1-like kinase, 1                                                    | -1.18 | 0.041 | -1.02 | 0.936 | -1.08 | 0.774 | -1.25 | 0.334 | -1.13 |
| 1433879_a_at | C130032J12Rik     | RIKEN cDNA C130032J12 gene                                                          | -1.1  | 0.512 | -1.15 | 0.124 | -1.03 | 0.895 | -1.03 | 0.576 | -1.08 |
| 1441878_s_at | 1810049H13Rik     | RIKEN cDNA 1810049H13 gene                                                          | -1.02 | 0.887 | -1.14 | 0.441 | -1.12 | 0.316 | -1.41 | 0.035 | -1.17 |
| 1437253_at   | A630054L15Rik     | RIKEN cDNA A630054L15 gene                                                          | -1.14 | 0.353 | -1.02 | 0.793 | -1.11 | 0.4   | -1.08 | 0.499 | -1.09 |
| 1457594_at   | ---               | Transcribed locus                                                                   | -1.07 | 0.843 | -1.07 | 0.791 | -1.13 | 0.191 | -1.27 | 0.478 | -1.14 |
| 1428985_at   | Ints12            | integrator complex subunit 12                                                       | -1.06 | 0.567 | -1.08 | 0.516 | -1.13 | 0.127 | -1.31 | 0.045 | -1.15 |
| 1418040_at   | 4432406C05Rik     | RIKEN cDNA 4432406C05 gene                                                          | -1.04 | 0.885 | -1.18 | 0.47  | -1.06 | 0.506 | -1.13 | 0.622 | -1.1  |
| 1455323_at   | Rbak              | RB-associated KRAB repressor                                                        | -1.07 | 0.814 | -1.02 | 0.848 | -1.2  | 0.389 | -1.08 | 0.768 | -1.09 |
| 1418401_a_at | Dusp16            | dual specificity phosphatase 16                                                     | -1.06 | 0.87  | -1    | 0.976 | -1.23 | 0.166 | -1.72 | 0.021 | -1.26 |
| 1448430_a_at | Naca /// LOC62827 | nascent polypeptide-associated complex alpha polypeptide /// similar to nascent p   | -1.09 | 0.476 | -1.11 | 0.068 | -1.07 | 0.091 | -1.41 | 0.027 | -1.17 |
| 1416103_at   | Ywhaz             | tyrosine 3-monooxygenase/tryptophan 5-monooxygenase activation protein, zeta        | -1.01 | 0.816 | -1.29 | 0.247 | -1.02 | 0.911 | -1.05 | 0.644 | -1.09 |
| 1434521_at   | Rfxdc2            | regulatory factor X domain containing 2 homolog (human)                             | -1.15 | 0.296 | -1.11 | 0.201 | -1.02 | 0.927 | -1.53 | 0.163 | -1.2  |
| 1434301_at   | D330050I23Rik     | RIKEN cDNA D330050I23 gene                                                          | -1.09 | 0.513 | -1.19 | 0.321 | -1    | 0.965 | -2.04 | 0.056 | -1.33 |
| 1420129_s_at | D10Wsu52e         | DNA segment, Chr 10, Wayne State University 52, expressed                           | -1.1  | 0.475 | -1.15 | 0.16  | -1.03 | 0.791 | -1.53 | 0.041 | -1.2  |
| 1450668_s_at | Hspe1             | heat shock protein 1 (chaperonin 10)                                                | -1.11 | 0.065 | -1.13 | 0.186 | -1.03 | 0.816 | -1.47 | 0.005 | -1.19 |
| 1446865_at   | Sema5a            | Sema domain, seven thrombospondin repeats (type 1 and type 1-like), transmem        | -1.1  | 0.659 | -1    | 0.997 | -1.18 | 0.753 | -2.66 | 0.043 | -1.49 |
| 1449951_at   | Nfkbi1            | nuclear factor of kappa light polypeptide gene enhancer in B-cells inhibitor-like 1 | -1.14 | 0.268 | -1.09 | 0.713 | -1.05 | 0.738 | -1.68 | 0.127 | -1.24 |
| 1415867_at   | Cct4              | chaperonin subunit 4 (delta)                                                        | -1.12 | 0.097 | -1.09 | 0.275 | -1.06 | 0.736 | -1.12 | 0.352 | -1.1  |
| 1427236_a_at | MLI5              | myeloid/lymphoid or mixed-lineage leukemia 5                                        | -1.06 | 0.51  | -1.18 | 0.087 | -1.04 | 0.773 | -1.43 | 0.206 | -1.18 |
| 1422059_at   | Cbx2              | chromobox homolog 2 (Drosophila Pc class)                                           | -1.01 | 0.99  | -1.16 | 0.799 | -1.11 | 0.65  | -1.52 | 0.736 | -1.2  |
| 1427321_s_at | Cxadr             | coxsackievirus and adenovirus receptor                                              | -1.06 | 0.718 | -1.1  | 0.794 | -1.11 | 0.6   | -1.14 | 0.663 | -1.1  |
| 1437521_s_at | E230022H04Rik     | RIKEN cDNA E230022H04 gene                                                          | -1.02 | 0.905 | -1.01 | 0.777 | -1.28 | 0.132 | -1.34 | 0.044 | -1.16 |
| 1428293_at   | 2310022M17Rik     | RIKEN cDNA 2310022M17 gene                                                          | -1.05 | 0.295 | -1.03 | 0.664 | -1.2  | 0.056 | -1.6  | 0.113 | -1.22 |
| 1433690_at   | 2210016L21Rik     | RIKEN cDNA 2210016L21 gene                                                          | -1.17 | 0.292 | -1.08 | 0.565 | -1.03 | 0.754 | -1.48 | 0.112 | -1.19 |
| 1448645_at   | Msl31             | male-specific lethal-3 homolog 1 (Drosophila)                                       | -1.01 | 0.943 | -1.06 | 0.585 | -1.22 | 0.063 | -1.12 | 0.452 | -1.1  |
| 1429141_at   | Neurl2            | neuralized-like 2 (Drosophila)                                                      | -1.27 | 0.068 | -1.01 | 0.953 | -1.02 | 0.882 | -1.66 | 0.028 | -1.24 |
| 1428944_at   | Ube1l2            | ubiquitin-activating enzyme E1-like 2                                               | -1.02 | 0.843 | -1.05 | 0.715 | -1.22 | 0.247 | -1.17 | 0.344 | -1.11 |
| 1455320_at   | ---               | ---                                                                                 | -1.04 | 0.871 | -1.04 | 0.817 | -1.21 | 0.341 | -1.02 | 0.88  | -1.08 |
| 1451200_at   | Kif1b             | kinesin family member 1B                                                            | -1.05 | 0.292 | -1.19 | 0.109 | -1.03 | 0.819 | -1.32 | 0.162 | -1.15 |
| 1450892_a_at | Usp4              | ubiquitin specific peptidase 4 (proto-oncogene)                                     | -1.05 | 0.586 | -1.09 | 0.079 | -1.13 | 0.293 | -1.07 | 0.647 | -1.09 |
| 1423568_at   | Psma7             | proteasome (prosome, macropain) subunit, alpha type 7                               | -1.07 | 0.358 | -1.15 | 0.014 | -1.05 | 0.701 | -1.34 | 0.196 | -1.15 |
| 1415818_at   | Anxa6             | annexin A6                                                                          | -1.08 | 0.753 | -1.09 | 0.375 | -1.1  | 0.457 | -1.59 | 0.255 | -1.21 |
| 1416207_at   | Taz               | tafazzin                                                                            | -1.14 | 0.085 | -1.09 | 0.411 | -1.04 | 0.328 | -1.41 | 0.22  | -1.17 |
| 1427162_a_at | Elk4              | ELK4, member of ETS oncogene family                                                 | -1.07 | 0.64  | -1.01 | 0.917 | -1.2  | 0.256 | -1.37 | 0.144 | -1.16 |
| 1425058_at   | Zfp472            | zinc finger protein 472                                                             | -1.17 | 0.305 | -1.02 | 0.932 | -1.09 | 0.592 | -1.9  | 0.088 | -1.29 |
| 1416393_at   | Emg1              | EMG1 nucleolar protein homolog (S. cerevisiae)                                      | -1.04 | 0.51  | -1.04 | 0.387 | -1.2  | 0.308 | -1.05 | 0.604 | -1.08 |
| 1446661_at   | ---               | ---                                                                                 | -1.06 | 0.923 | -1.08 | 0.834 | -1.13 | 0.624 | -1.61 | 0.32  | -1.22 |
| 1453833_a_at | Rnaseh1           | ribonuclease H1                                                                     | -1.2  | 0.625 | -1.06 | 0.706 | -1.02 | 0.917 | -1.28 | 0.114 | -1.14 |
| 1423202_a_at | Ncor1             | nuclear receptor co-repressor 1                                                     | -1.05 | 0.482 | -1.12 | 0.054 | -1.09 | 0.501 | -1.14 | 0.231 | -1.1  |
| 1419760_a_at | ORF5              | open reading frame 5                                                                | -1.03 | 0.811 | -1.11 | 0.193 | -1.14 | 0.503 | -1.04 | 0.643 | -1.08 |
| 1419041_at   | Itfg1             | integrin alpha FG-GAP repeat containing 1                                           | -1.02 | 0.766 | -1.08 | 0.124 | -1.17 | 0.134 | -1.09 | 0.606 | -1.09 |
| 1422569_at   | Yy1               | YY1 transcription factor                                                            | -1.15 | 0.186 | -1.02 | 0.514 | -1.1  | 0.169 | -1.09 | 0.277 | -1.09 |
| 1434018_at   | BC043098          | cDNA sequence BC043098                                                              | -1.02 | 0.951 | -1.12 | 0.463 | -1.14 | 0.667 | -1.72 | 0.058 | -1.25 |
| 1416245_at   | Aurkaip1          | aurora kinase A interacting protein 1                                               | -1.07 | 0.451 | -1.11 | 0.194 | -1.09 | 0.454 | -1.04 | 0.77  | -1.08 |
| 1451089_a_at | Arcn1             | archain 1                                                                           | -1.1  | 0.107 | -1    | 0.946 | -1.18 | 0.009 | -1.21 | 0.048 | -1.12 |

|              |                    |                                                                                  |       |       |       |       |       |       |       |       |       |
|--------------|--------------------|----------------------------------------------------------------------------------|-------|-------|-------|-------|-------|-------|-------|-------|-------|
| 1428428_at   | Abhd11             | abhydrolase domain containing 11                                                 | -1.1  | 0.123 | -1.09 | 0.209 | -1.07 | 0.672 | -1.31 | 0.043 | -1.14 |
| 1427877_at   | 2610312B22Rik      | RIKEN cDNA 2610312B22 gene                                                       | -1.05 | 0.557 | -1.07 | 0.667 | -1.14 | 0.432 | -1.23 | 0.417 | -1.12 |
| 1440281_at   | 0610042C05Rik      | RIKEN cDNA 0610042C05 gene                                                       | -1.03 | 0.853 | -1.2  | 0.236 | -1.04 | 0.855 | -1.68 | 0.081 | -1.24 |
| 1454853_s_at | AW146154 /// AI987 | expressed sequence AW146154 /// expressed sequence AI987944                      | -1.13 | 0.432 | -1.08 | 0.491 | -1.06 | 0.82  | -1.51 | 0.152 | -1.19 |
| 1452621_at   | Pcbd2              | pterin 4 alpha carbinolamine dehydratase/dimerization cofactor of hepatocyte nuc | -1.04 | 0.72  | -1.18 | 0.252 | -1.06 | 0.472 | -1.06 | 0.054 | -1.08 |
| 1418125_at   | Inoc1              | INO80 complex homolog 1 (S. cerevisiae)                                          | -1.15 | 0.514 | -1.08 | 0.613 | -1.03 | 0.77  | -1.15 | 0.259 | -1.1  |
| 1428470_at   | Exoc2              | exocyst complex component 2                                                      | -1.05 | 0.516 | -1.16 | 0.264 | -1.05 | 0.651 | -1.08 | 0.409 | -1.09 |
| 1438208_at   | Taok2              | TAO kinase 2                                                                     | -1.04 | 0.829 | -1.23 | 0.239 | -1.01 | 0.941 | -1.07 | 0.852 | -1.09 |
| 1439235_x_at | Tm2d2              | TM2 domain containing 2                                                          | -1.07 | 0.676 | -1.06 | 0.607 | -1.13 | 0.037 | -1.06 | 0.316 | -1.08 |
| 1416821_at   | Es2el              | expressed sequence 2 embryonic lethal                                            | -1.08 | 0.666 | -1.19 | 0.69  | -1    | 0.989 | -1.21 | 0.198 | -1.12 |
| 1424095_at   | Rtcd1              | RNA terminal phosphate cyclase domain 1                                          | -1.04 | 0.742 | -1.18 | 0.001 | -1.06 | 0.564 | -1.05 | 0.67  | -1.08 |
| 1422498_at   | Mageh1             | melanoma antigen, family H, 1                                                    | -1.12 | 0.518 | -1.05 | 0.725 | -1.09 | 0.761 | -1.12 | 0.748 | -1.1  |
| 1448808_a_at | Nme2               | expressed in non-metastatic cells 2, protein                                     | -1.17 | 0.035 | -1.04 | 0.687 | -1.06 | 0.427 | -1.54 | 0.139 | -1.2  |
| 1421914_s_at | Mrp19              | mitochondrial ribosomal protein L19                                              | -1.06 | 0.506 | -1.13 | 0.15  | -1.07 | 0.542 | -1.06 | 0.67  | -1.08 |
| 1457002_at   | Zfp408             | zinc finger protein 408                                                          | -1.18 | 0.24  | -1.06 | 0.716 | -1.03 | 0.818 | -1.25 | 0.288 | -1.13 |
| 1426748_s_at | Abcf3              | ATP-binding cassette, sub-family F (GCN20), member 3                             | -1.14 | 0.484 | -1.02 | 0.929 | -1.11 | 0.062 | -1.07 | 0.47  | -1.09 |
| 1424319_at   | Oraov1             | oral cancer overexpressed 1                                                      | -1.05 | 0.627 | -1.17 | 0.242 | -1.06 | 0.786 | -1.35 | 0.017 | -1.15 |
| 1452798_s_at | Mapk1p1            | mitogen activated protein kinase 1 interacting protein 1                         | -1.1  | 0.454 | -1.11 | 0.18  | -1.05 | 0.732 | -1.6  | 0.071 | -1.22 |
| 1416775_at   | 2310004L02Rik      | RIKEN cDNA 2310004L02 gene                                                       | -1.16 | 0.622 | -1.09 | 0.669 | -1.02 | 0.898 | -2.04 | 0.078 | -1.33 |
| 1435232_x_at | ---                | ---                                                                              | -1.11 | 0.069 | -1.05 | 0.41  | -1.09 | 0.543 | -1.07 | 0.615 | -1.08 |
| 1437976_x_at | Rpl23a             | ribosomal protein L23a                                                           | -1.03 | 0.306 | -1    | 0.957 | -1.26 | 0.017 | -1.23 | 0     | -1.13 |
| 1418737_at   | Nudt2              | nudix (nucleoside diphosphate linked moiety X)-type motif 2                      | -1.23 | 0.385 | -1.03 | 0.842 | -1.02 | 0.781 | -1.26 | 0.143 | -1.14 |
| 1454690_at   | Ikbgk              | inhibitor of kappaB kinase gamma                                                 | -1.01 | 0.923 | -1.2  | 0.072 | -1.07 | 0.401 | -1.08 | 0.755 | -1.09 |
| 1435437_at   | Setd7              | SET domain containing (lysine methyltransferase) 7                               | -1.18 | 0.249 | -1.05 | 0.81  | -1.04 | 0.855 | -1.4  | 0.195 | -1.17 |
| 1419002_s_at | Baat               | bile acid-Coenzyme A: amino acid N-acyltransferase                               | -1.03 | 0.108 | -1.22 | 0.098 | -1.03 | 0.893 | -1.77 | 0.321 | -1.26 |
| 1418462_at   | Exosc9             | exosome component 9                                                              | -1.18 | 0.338 | -1.03 | 0.785 | -1.06 | 0.45  | -1.11 | 0.467 | -1.1  |
| 1422356_at   | V1rb10             | vomeranase 1 receptor, B10                                                       | -1.18 | 0.462 | -1.02 | 0.863 | -1.07 | 0.338 | -1.18 | 0.507 | -1.11 |
| 1426515_a_at | Tor1a              | torsin family 1, member A (torsin A)                                             | -1.09 | 0.524 | -1.14 | 0.336 | -1.03 | 0.745 | -1.46 | 0.002 | -1.18 |
| 1455110_at   | Gabpb2             | GA repeat binding protein, beta 2                                                | -1.01 | 0.926 | -1.09 | 0.152 | -1.17 | 0.254 | -1.06 | 0.724 | -1.08 |
| 1455169_at   | Rab11fip2          | RAB11 family interacting protein 2 (class I)                                     | -1.05 | 0.739 | -1.13 | 0.034 | -1.08 | 0.309 | -1.2  | 0.34  | -1.11 |
| 1452462_a_at | Banp               | Btg3 associated nuclear protein                                                  | -1.12 | 0.244 | -1.06 | 0.697 | -1.08 | 0.655 | -1.22 | 0.46  | -1.12 |
| 1441239_at   | Kctd18             | potassium channel tetramerisation domain containing 18                           | -1    | 0.999 | -1.14 | 0.417 | -1.13 | 0.581 | -1.44 | 0.22  | -1.18 |
| 1455284_x_at | Pigx               | phosphatidylinositol glycan anchor biosynthesis, class X                         | -1.02 | 0.958 | -1.03 | 0.938 | -1.23 | 0.368 | -1.09 | 0.781 | -1.09 |
| 1437181_at   | Peli2              | pellino 2                                                                        | -1.17 | 0.578 | -1.05 | 0.454 | -1.05 | 0.825 | -1.57 | 0.288 | -1.21 |
| 1435002_at   | zfp507             | zinc finger protein 507                                                          | -1.09 | 0.641 | -1.06 | 0.531 | -1.12 | 0.384 | -1.26 | 0.092 | -1.13 |
| 1426853_at   | Set                | SET translocation                                                                | -1.05 | 0.775 | -1.01 | 0.881 | -1.22 | 0.106 | -1.19 | 0.313 | -1.12 |
| 1420497_a_at | Cebpz              | CCAAT/enhancer binding protein zeta                                              | -1.03 | 0.885 | -1.07 | 0.24  | -1.17 | 0.334 | -1.37 | 0.191 | -1.16 |
| 1415759_a_at | Hbxip              | hepatitis B virus x interacting protein                                          | -1.12 | 0.359 | -1.08 | 0.383 | -1.06 | 0.631 | -1.38 | 0.081 | -1.16 |
| 1419976_s_at | Nfatc3             | nuclear factor of activated T-cells, cytoplasmic, calcineurin-dependent 3        | -1.1  | 0.246 | -1.01 | 0.901 | -1.16 | 0.113 | -1.62 | 0.06  | -1.22 |
| 1451448_a_at | 1110005A03Rik      | RIKEN cDNA 1110005A03 gene                                                       | -1.08 | 0.323 | -1.03 | 0.657 | -1.16 | 0.397 | -1.96 | 0.101 | -1.31 |
| 1433666_s_at | Vps41              | vacuolar protein sorting 41 (yeast)                                              | -1.08 | 0.497 | -1.08 | 0.039 | -1.09 | 0.153 | -1.19 | 0.43  | -1.11 |
| 1438568_at   | Mrgpre             | MAS-related GPR, member E                                                        | -1.02 | 0.985 | -1.06 | 0.818 | -1.2  | 0.368 | -1.21 | 0.037 | -1.12 |
| 1448480_at   | Nip7               | nuclear import 7 homolog (S. cerevisiae)                                         | -1.13 | 0.241 | -1.04 | 0.759 | -1.09 | 0.497 | -1.21 | 0.441 | -1.12 |
| 1448387_at   | Rbx1               | ring-box 1                                                                       | -1.1  | 0.149 | -1.1  | 0.043 | -1.05 | 0.553 | -1.1  | 0.331 | -1.09 |
| 1436804_s_at | Scyl1              | SCY1-like 1 (S. cerevisiae)                                                      | -1.04 | 0.827 | -1.14 | 0.273 | -1.08 | 0.701 | -1.28 | 0.045 | -1.14 |
| 1428746_a_at | Trspap1            | tRNA selenocysteine associated protein 1                                         | -1.04 | 0.758 | -1.01 | 0.813 | -1.23 | 0.24  | -1.32 | 0.248 | -1.15 |
| 1434254_at   | Gna11              | guanine nucleotide binding protein, alpha 11                                     | -1    | 0.978 | -1.02 | 0.77  | -1.26 | 0.028 | -1.38 | 0.139 | -1.17 |
| 1438610_x_at | Cryz               | Crystallin, zeta                                                                 | -1.04 | 0.491 | -1.08 | 0.631 | -1.14 | 0.386 | -1.02 | 0.829 | -1.07 |
| 1424106_at   | 1200003C05Rik      | RIKEN cDNA 1200003C05 gene                                                       | -1.03 | 0.634 | -1.03 | 0.55  | -1.22 | 0.071 | -1.14 | 0.359 | -1.1  |
| 1444998_at   | ---                | Transcribed locus                                                                | -1.04 | 0.234 | -1.22 | 0.146 | -1.02 | 0.893 | -1.29 | 0.494 | -1.14 |
| 1433794_at   | Setx               | senataxin                                                                        | -1.09 | 0.585 | -1.01 | 0.811 | -1.17 | 0.173 | -1.51 | 0.082 | -1.19 |
| 1455474_at   | D6Wsu116e          | DNA segment, Chr 6, Wayne State University 116, expressed                        | -1.19 | 0.22  | -1.02 | 0.925 | -1.05 | 0.789 | -1.46 | 0.455 | -1.18 |
| 1417823_at   | Gcat               | glycine C-acetyltransferase (2-amino-3-ketobutyrate-coenzyme A ligase)           | -1.23 | 0.53  | -1.05 | 0.875 | -1    | 0.985 | -1.59 | 0.415 | -1.22 |

|              |                   |                                                                                          |       |       |       |       |       |       |       |       |       |
|--------------|-------------------|------------------------------------------------------------------------------------------|-------|-------|-------|-------|-------|-------|-------|-------|-------|
| 1452756_at   | 0610009J22Rik     | RIKEN cDNA 0610009J22 gene                                                               | -1.07 | 0.71  | -1.14 | 0.396 | -1.04 | 0.758 | -1.16 | 0.569 | -1.1  |
| 1457285_at   | Zfp187            | zinc finger protein 187                                                                  | -1.02 | 0.613 | -1.09 | 0.337 | -1.15 | 0.23  | -1.28 | 0.474 | -1.13 |
| 1433976_at   | D10Ucla1          | DNA segment, Chr 10, University of California at Los Angeles 1                           | -1.04 | 0.241 | -1.13 | 0.208 | -1.09 | 0.35  | -1.19 | 0.487 | -1.11 |
| 1436899_at   | 2700019D07Rik     | RIKEN cDNA 2700019D07 gene                                                               | -1.1  | 0.747 | -1.01 | 0.881 | -1.15 | 0.115 | -1.81 | 0.027 | -1.27 |
| 1435734_x_at | Dus1l             | dihydrouridine synthase 1-like (S. cerevisiae)                                           | -1.02 | 0.467 | -1.17 | 0.086 | -1.07 | 0.667 | -1.07 | 0.628 | -1.08 |
| 1428667_at   | Maoa              | monoamine oxidase A                                                                      | -1.03 | 0.846 | -1.07 | 0.004 | -1.16 | 0.341 | -1.01 | 0.953 | -1.07 |
| 1434213_x_at | Ndufs8            | NADH dehydrogenase (ubiquinone) Fe-S protein 8                                           | -1.11 | 0.501 | -1.03 | 0.721 | -1.11 | 0.267 | -1.35 | 0.175 | -1.15 |
| 1416486_at   | Scye1             | small inducible cytokine subfamily E, member 1                                           | -1.01 | 0.967 | -1.14 | 0.154 | -1.12 | 0.24  | -1.28 | 0.053 | -1.14 |
| 1417372_a_at | Peli1             | pellino 1                                                                                | -1.14 | 0.555 | -1.01 | 0.922 | -1.11 | 0.354 | -2.02 | 0.073 | -1.32 |
| 1455042_at   | Tbl1x             | Transducin (beta)-like 1 X-linked                                                        | -1.09 | 0.524 | -1.13 | 0.241 | -1.04 | 0.723 | -1.14 | 0.388 | -1.1  |
| 1434617_x_at | 1810073N04Rik     | RIKEN cDNA 1810073N04 gene                                                               | -1.07 | 0.661 | -1    | 0.97  | -1.2  | 0.643 | -1.26 | 0.229 | -1.13 |
| 1434145_s_at | Serhl             | serine hydrolase-like                                                                    | -1.02 | 0.906 | -1.17 | 0.41  | -1.07 | 0.767 | -1.31 | 0.117 | -1.14 |
| 1420850_at   | Crnk1             | Crn, crooked neck-like 1 (Drosophila)                                                    | -1.05 | 0.347 | -1.18 | 0.293 | -1.04 | 0.814 | -1.15 | 0.615 | -1.1  |
| 1435205_at   | Tcfap2e           | transcription factor AP-2, epsilon                                                       | -1.01 | 0.942 | -1.18 | 0.532 | -1.07 | 0.304 | -1.29 | 0.233 | -1.14 |
| 1427136_s_at | Sfrs12            | splicing factor, arginine/serine-rich 12                                                 | -1.08 | 0.819 | -1.02 | 0.924 | -1.16 | 0.463 | -1.19 | 0.404 | -1.11 |
| 1433677_at   | Sfrs8             | splicing factor, arginine/serine-rich 8                                                  | -1.15 | 0.206 | -1.04 | 0.678 | -1.06 | 0.432 | -1.03 | 0.796 | -1.07 |
| 1435377_at   | ---               | ---                                                                                      | -1.03 | 0.882 | -1.08 | 0.348 | -1.15 | 0.317 | -1.11 | 0.279 | -1.09 |
| 1459396_at   | 6030446N20Rik     | RIKEN cDNA 6030446N20 gene                                                               | -1.07 | 0.897 | -1.17 | 0.69  | -1.02 | 0.972 | -2.11 | 0.114 | -1.34 |
| 1452155_a_at | Ddx17             | DEAD (Asp-Glu-Ala-Asp) box polypeptide 17                                                | -1.06 | 0.712 | -1.03 | 0.519 | -1.16 | 0.386 | -1.33 | 0.19  | -1.15 |
| 1427192_a_at | Brd8              | bromodomain containing 8                                                                 | -1.12 | 0.476 | -1.01 | 0.927 | -1.13 | 0.274 | -1.15 | 0.232 | -1.1  |
| 1440689_at   | Foxk2             | forkhead box K2                                                                          | -1.1  | 0.665 | -1.04 | 0.573 | -1.12 | 0.422 | -1.25 | 0.155 | -1.12 |
| 1430401_at   | 3110045C21Rik     | RIKEN cDNA 3110045C21 gene                                                               | -1.14 | 0.51  | -1.02 | 0.975 | -1.09 | 0.857 | -1.37 | 0.616 | -1.16 |
| 1425183_a_at | Rpl4              | ribosomal protein L4                                                                     | -1.06 | 0.476 | -1.05 | 0.171 | -1.14 | 0.013 | -1.31 | 0.004 | -1.14 |
| 1455268_at   | Zcs12             | zinc finger, CSL domain containing 2                                                     | -1.02 | 0.905 | -1.01 | 0.954 | -1.24 | 0.065 | -1.14 | 0.676 | -1.11 |
| 1437984_x_at | Bat1a             | HLA-B-associated transcript 1A                                                           | -1.13 | 0.016 | -1.09 | 0.537 | -1.04 | 0.805 | -1.3  | 0.087 | -1.14 |
| 1434571_at   | Vps13b /// LOC666 | vacuolar protein sorting 13B (yeast) /// similar to vacuolar protein sorting 13B isoform | -1.21 | 0.339 | -1.04 | 0.689 | -1.02 | 0.695 | -1.12 | 0.309 | -1.1  |
| 1460338_a_at | Cr1f3             | cytokine receptor-like factor 3                                                          | -1.16 | 0.025 | -1.08 | 0.314 | -1.02 | 0.888 | -1.68 | 0.017 | -1.24 |
| 1436315_at   | Myst3             | MYST histone acetyltransferase (monocytic leukemia) 3                                    | -1.04 | 0.482 | -1    | 0.983 | -1.23 | 0.106 | -1.09 | 0.311 | -1.09 |
| 1453379_at   | 4930519P11Rik     | RIKEN cDNA 4930519P11 gene                                                               | -1.18 | 0.846 | -1.04 | 0.921 | -1.04 | 0.926 | -2.25 | 0.291 | -1.38 |
| 1428464_at   | Ndufa3            | NADH dehydrogenase (ubiquinone) 1 alpha subcomplex, 3                                    | -1.01 | 0.97  | -1.17 | 0.121 | -1.09 | 0.525 | -1.14 | 0.38  | -1.1  |
| 1456581_x_at | Gdi2              | guanosine diphosphate (GDP) dissociation inhibitor 2                                     | -1.03 | 0.529 | -1.07 | 0.01  | -1.16 | 0.027 | -1.3  | 0.161 | -1.14 |
| 1420611_at   | Prkacb            | protein kinase, cAMP dependent, catalytic, beta                                          | -1.11 | 0.3   | -1.09 | 0.461 | -1.05 | 0.73  | -1.43 | 0.224 | -1.17 |
| 1426949_s_at | Tpr               | translocated promoter region                                                             | -1.08 | 0.485 | -1.03 | 0.615 | -1.13 | 0.349 | -1    | 0.974 | -1.06 |
| 1433591_at   | Ppp3r1            | protein phosphatase 3, regulatory subunit B, alpha isoform (calcineurin B, type I)       | -1.06 | 0.823 | -1.05 | 0.674 | -1.13 | 0.359 | -1.02 | 0.904 | -1.07 |
| 1423099_a_at | Mettl3            | methyltransferase-like 3                                                                 | -1.09 | 0.309 | -1.01 | 0.81  | -1.15 | 0.113 | -1.41 | 0.1   | -1.17 |
| 1418850_at   | Epc1              | enhancer of polycomb homolog 1 (Drosophila)                                              | -1.05 | 0.57  | -1.06 | 0.33  | -1.14 | 0.468 | -1.29 | 0.253 | -1.13 |
| 1449445_x_at | Mfap1             | microfibrillar-associated protein 1                                                      | -1.06 | 0.552 | -1.07 | 0.323 | -1.12 | 0.007 | -1.2  | 0.127 | -1.11 |
| 1452169_a_at | Dgkz              | diacylglycerol kinase zeta                                                               | -1.05 | 0.804 | -1.13 | 0.399 | -1.07 | 0.755 | -2.36 | 0.026 | -1.4  |
| 1435186_s_at | Lrrcc1            | leucine rich repeat and coiled-coil domain containing 1                                  | -1.03 | 0.817 | -1.16 | 0.532 | -1.06 | 0.499 | -1.19 | 0.165 | -1.11 |
| 1436113_a_at | St13              | suppression of tumorigenicity 13                                                         | -1.07 | 0.408 | -1.16 | 0.337 | -1.02 | 0.881 | -1.13 | 0.435 | -1.09 |
| 1424080_at   | Dcps              | decapping enzyme, scavenger                                                              | -1.11 | 0.541 | -1.12 | 0.293 | -1.02 | 0.922 | -1.07 | 0.592 | -1.08 |
| 1424388_at   | Cluap1            | clusterin associated protein 1                                                           | -1.02 | 0.936 | -1.16 | 0.16  | -1.07 | 0.689 | -1.36 | 0.19  | -1.15 |
| 1441940_x_at | Klhdc8a           | kelch domain containing 8A                                                               | -1.1  | 0.658 | -1.08 | 0.88  | -1.06 | 0.774 | -1.37 | 0.552 | -1.15 |
| 1417794_at   | Zmym3             | zinc finger, MYM-type 3                                                                  | -1.18 | 0.199 | -1    | 0.997 | -1.07 | 0.623 | -1.13 | 0.375 | -1.1  |
| 1423763_x_at | Tia1              | Cytotoxic granule-associated RNA binding protein 1                                       | -1.02 | 0.685 | -1.01 | 0.89  | -1.23 | 0.06  | -1.21 | 0.044 | -1.12 |
| 1416327_at   | Ufc1              | ubiquitin-fold modifier conjugating enzyme 1                                             | -1.11 | 0.369 | -1.09 | 0.064 | -1.05 | 0.713 | -1.09 | 0.373 | -1.08 |
| 1440151_s_at | Edf1              | endothelial differentiation-related factor 1                                             | -1.05 | 0.045 | -1.13 | 0.268 | -1.07 | 0.169 | -1.29 | 0.19  | -1.13 |
| 1416506_at   | Psmab6            | proteasome (prosome, macropain) subunit, alpha type 6                                    | -1.09 | 0.04  | -1.09 | 0.041 | -1.06 | 0.644 | -1.11 | 0.507 | -1.09 |
| 1436546_at   | Lix1l             | Lix1-like                                                                                | -1.21 | 0.064 | -1.03 | 0.862 | -1.03 | 0.892 | -1.12 | 0.62  | -1.09 |
| 1431289_at   | Tspan32           | tetraspanin 32                                                                           | -1.22 | 0.726 | -1    | 0.999 | -1.04 | 0.906 | -1.1  | 0.501 | -1.09 |
| 1448722_s_at | Ppcs              | phosphopantothencysteine synthetase                                                      | -1.05 | 0.428 | -1.19 | 0.118 | -1.01 | 0.881 | -1.56 | 0.122 | -1.2  |
| 1430605_at   | Ccdc101           | coiled-coil domain containing 101                                                        | -1.08 | 0.724 | -1.05 | 0.796 | -1.12 | 0.355 | -1.02 | 0.946 | -1.07 |
| 1452625_at   | Kctd2             | potassium channel tetramerisation domain containing 2                                    | -1.1  | 0.319 | -1.08 | 0.639 | -1.06 | 0.738 | -1.35 | 0.268 | -1.15 |

|              |                    |                                                                                        |       |       |       |       |       |       |       |       |       |
|--------------|--------------------|----------------------------------------------------------------------------------------|-------|-------|-------|-------|-------|-------|-------|-------|-------|
| 1434085_at   | Zfp523             | zinc finger protein 523                                                                | -1.14 | 0.463 | -1.04 | 0.645 | -1.06 | 0.556 | -1.25 | 0.321 | -1.12 |
| 1449323_at   | Rpl3 /// LOC668215 | ribosomal protein L3 /// similar to ribosomal protein L3 isoform b /// similar to 60S  | -1.03 | 0.606 | -1.04 | 0.573 | -1.18 | 0.057 | -1.26 | 0.015 | -1.13 |
| 1440235_at   | Itga10             | integrin, alpha 10                                                                     | -1.09 | 0.596 | -1.15 | 0.752 | -1.01 | 0.977 | -1.09 | 0.621 | -1.09 |
| 1460352_s_at | Pik3r4             | phosphatidylinositol 3 kinase, regulatory subunit, polypeptide 4, p150                 | -1.05 | 0.573 | -1.09 | 0.125 | -1.1  | 0.59  | -2.89 | 0.021 | -1.53 |
| 1420089_at   | Nfkbia             | Nuclear factor of kappa light chain gene enhancer in B-cells inhibitor, alpha          | -1.06 | 0.679 | -1.01 | 0.923 | -1.18 | 0.275 | -1.34 | 0.157 | -1.15 |
| 1427966_at   | BC087945           | cDNA sequence BC087945                                                                 | -1.03 | 0.779 | -1.15 | 0.307 | -1.06 | 0.67  | -1.73 | 0.145 | -1.24 |
| 1427442_a_at | App                | amyloid beta (A4) precursor protein                                                    | -1.05 | 0.207 | -1.08 | 0.345 | -1.11 | 0.345 | -1.07 | 0.673 | -1.08 |
| 1424342_at   | Fyttd1             | forty-two-three domain containing 1                                                    | -1.05 | 0.768 | -1.08 | 0.384 | -1.1  | 0.703 | -1.31 | 0.216 | -1.14 |
| 1439799_at   | ---                | Transcribed locus                                                                      | -1.13 | 0.211 | -1.07 | 0.78  | -1.04 | 0.88  | -1.54 | 0.306 | -1.2  |
| 1422669_at   | Ebag9              | estrogen receptor-binding fragment-associated gene 9                                   | -1.13 | 0.021 | -1.11 | 0.046 | -1.01 | 0.918 | -1.14 | 0.2   | -1.1  |
| 1435739_at   | AW208599           | expressed sequence AW208599                                                            | -1.03 | 0.555 | -1.11 | 0.321 | -1.1  | 0.412 | -1.04 | 0.687 | -1.07 |
| 1451550_at   | Ephb3              | Eph receptor B3                                                                        | -1.22 | 0.661 | -1.03 | 0.94  | -1.01 | 0.932 | -1.2  | 0.709 | -1.12 |
| 1416883_at   | Clptm1             | cleft lip and palate associated transmembrane protein 1                                | -1.09 | 0.543 | -1.06 | 0.434 | -1.09 | 0.563 | -1.06 | 0.468 | -1.07 |
| 1418628_at   | Khdrbs1            | KH domain containing, RNA binding, signal transduction associated 1                    | -1.01 | 0.959 | -1.18 | 0.134 | -1.06 | 0.722 | -1.02 | 0.922 | -1.07 |
| 1438318_x_at | Ngdn               | neuroguidin, EIF4E binding protein                                                     | -1.01 | 0.895 | -1.04 | 0.601 | -1.21 | 0.212 | -1.39 | 0.019 | -1.16 |
| 1426296_at   | Rad52              | RAD52 homolog (S. cerevisiae)                                                          | -1.04 | 0.828 | -1.03 | 0.85  | -1.18 | 0.022 | -1.11 | 0.658 | -1.09 |
| 1420119_s_at | Phf3               | PHD finger protein 3                                                                   | -1.12 | 0.732 | -1.11 | 0.683 | -1.01 | 0.894 | -1.13 | 0.606 | -1.09 |
| 1439531_at   | E130311K13Rik      | RIKEN cDNA E130311K13 gene                                                             | -1.02 | 0.841 | -1.04 | 0.638 | -1.19 | 0.306 | -1.45 | 0.211 | -1.18 |
| 1438032_at   | Lrch1              | leucine-rich repeats and calponin homology (CH) domain containing 1                    | -1.02 | 0.949 | -1.04 | 0.757 | -1.19 | 0.181 | -1.43 | 0.02  | -1.17 |
| 1439563_at   | Zfp3               | zinc finger protein 3                                                                  | -1.08 | 0.85  | -1.11 | 0.638 | -1.05 | 0.563 | -1.23 | 0.471 | -1.12 |
| 1418960_at   | Phf20l1            | PHD finger protein 20-like 1                                                           | -1.11 | 0.517 | -1.02 | 0.931 | -1.12 | 0.416 | -1.45 | 0.031 | -1.17 |
| 1416647_at   | Bckdha             | branched chain ketoacid dehydrogenase E1, alpha polypeptide                            | -1.05 | 0.798 | -1.2  | 0.23  | -1.01 | 0.96  | -1.29 | 0.309 | -1.14 |
| 1454350_at   | Pdzd6              | PDZ domain containing 6                                                                | -1.04 | 0.894 | -1.14 | 0.378 | -1.06 | 0.753 | -1.28 | 0.225 | -1.13 |
| 1426789_s_at | Ssrp1              | structure specific recognition protein 1                                               | -1.21 | 0.04  | -1.03 | 0.657 | -1.01 | 0.938 | -1    | 0.987 | -1.06 |
| 1423130_a_at | Sfrs5 /// LOC62246 | splicing factor, arginine/serine-rich 5 (SRp40, HRS) /// similar to Splicing factor, a | -1.1  | 0.747 | -1.05 | 0.746 | -1.08 | 0.556 | -1.17 | 0.581 | -1.1  |
| 1429103_at   | Tomm22             | translocase of outer mitochondrial membrane 22 homolog (yeast)                         | -1.01 | 0.956 | -1.22 | 0.049 | -1.03 | 0.809 | -1.01 | 0.966 | -1.07 |
| 1434251_at   | Cnot1              | CCR4-NOT transcription complex, subunit 1                                              | -1.06 | 0.363 | -1.03 | 0.798 | -1.15 | 0.079 | -1.19 | 0.111 | -1.11 |
| 1423045_at   | Ncbp2              | nuclear cap binding protein subunit 2                                                  | -1.05 | 0.134 | -1.04 | 0.694 | -1.15 | 0.203 | -1.17 | 0.199 | -1.1  |
| 1432629_at   | ---                | ---                                                                                    | -1.08 | 0.92  | -1.14 | 0.232 | -1.02 | 0.953 | -1.32 | 0.258 | -1.14 |
| 1416708_a_at | Gramd1a            | GRAM domain containing 1A                                                              | -1.18 | 0.156 | -1.03 | 0.855 | -1.04 | 0.757 | -2.39 | 0.023 | -1.41 |
| 1440076_at   | Sqstm1             | Sequestosome 1                                                                         | -1.06 | 0.132 | -1.09 | 0.496 | -1.08 | 0.522 | -1.12 | 0.699 | -1.09 |
| 1422555_s_at | Gna13              | guanine nucleotide binding protein, alpha 13                                           | -1.02 | 0.744 | -1    | 0.96  | -1.23 | 0.076 | -1.28 | 0.435 | -1.13 |
| 1416291_at   | Psmc4              | proteasome (prosome, macropain) 26S subunit, ATPase, 4                                 | -1.07 | 0.33  | -1.11 | 0.02  | -1.05 | 0.659 | -1.17 | 0.372 | -1.1  |
| 1428950_s_at | Nol8               | nucleolar protein 8                                                                    | -1.05 | 0.912 | -1.07 | 0.565 | -1.12 | 0.63  | -1.05 | 0.77  | -1.07 |
| 1434019_at   | Pdap1              | PDGFA associated protein 1                                                             | -1.09 | 0.124 | -1.1  | 0.401 | -1.05 | 0.768 | -1.02 | 0.904 | -1.06 |
| 1451134_a_at | Tm2d2              | TM2 domain containing 2                                                                | -1.12 | 0.437 | -1.05 | 0.598 | -1.06 | 0.557 | -1.2  | 0.301 | -1.11 |
| 1436595_at   | Rbm34              | RNA binding motif protein 34                                                           | -1.08 | 0.603 | -1.07 | 0.329 | -1.08 | 0.554 | -1.12 | 0.122 | -1.09 |
| 1449294_at   | Mrps15             | mitochondrial ribosomal protein S15                                                    | -1.04 | 0.644 | -1.02 | 0.887 | -1.19 | 0.077 | -1.32 | 0.384 | -1.14 |
| 1428367_at   | Ndst1              | N-deacetylase/N-sulfotransferase (heparan glucosaminyl) 1                              | -1.13 | 0.678 | -1.01 | 0.954 | -1.09 | 0.825 | -1.37 | 0.47  | -1.15 |
| 1460726_at   | Adss               | adenylosuccinate synthetase, non muscle                                                | -1.01 | 0.926 | -1.22 | 0.022 | -1.02 | 0.881 | -1.04 | 0.683 | -1.07 |
| 1415751_at   | Hp1bp3             | heterochromatin protein 1, binding protein 3                                           | -1.04 | 0.666 | -1.16 | 0.079 | -1.04 | 0.709 | -1.08 | 0.522 | -1.08 |
| 1423361_at   | Yme1l1             | YME1-like 1 (S. cerevisiae)                                                            | -1.08 | 0.718 | -1.07 | 0.313 | -1.08 | 0.484 | -1.12 | 0.539 | -1.09 |
| 1433761_at   | Pde4dip            | phosphodiesterase 4D interacting protein (myomegalin)                                  | -1.21 | 0.521 | -1.02 | 0.902 | -1.02 | 0.946 | -1.63 | 0.161 | -1.22 |
| 1428855_at   | H13                | histocompatibility 13                                                                  | -1.12 | 0.638 | -1.09 | 0.885 | -1.02 | 0.929 | -3.5  | 0.096 | -1.68 |
| 1429194_at   | Tigd2              | tigger transposable element derived 2                                                  | -1.04 | 0.751 | -1    | 0.971 | -1.21 | 0.183 | -1.9  | 0.095 | -1.29 |
| 1417979_at   | Tnmd               | tenomodulin                                                                            | -1.04 | 0.936 | -1.02 | 0.947 | -1.18 | 0.697 | -1.22 | 0.699 | -1.12 |
| 1441089_at   | Eif2c3             | eukaryotic translation initiation factor 2C, 3                                         | -1.05 | 0.915 | -1.04 | 0.863 | -1.14 | 0.416 | -1.31 | 0.438 | -1.14 |
| 1418568_x_at | Srp14              | signal recognition particle 14                                                         | -1.02 | 0.702 | -1.04 | 0.216 | -1.18 | 0.026 | -1.28 | 0.081 | -1.13 |
| 1428520_at   | 1110032A13Rik      | RIKEN cDNA 1110032A13 gene                                                             | -1.05 | 0.556 | -1.13 | 0.088 | -1.05 | 0.764 | -1.08 | 0.315 | -1.08 |
| 1454947_a_at | Ublcp1 /// LOC6655 | ubiquitin-like domain containing CTD phosphatase 1 /// similar to ubiquitin-like do    | -1.07 | 0.784 | -1.04 | 0.845 | -1.12 | 0.543 | -1.19 | 0.253 | -1.11 |
| 1435278_at   | Sft2d3             | SFT2 domain containing 3                                                               | -1.02 | 0.902 | -1.15 | 0.263 | -1.06 | 0.705 | -1.27 | 0.284 | -1.13 |
| 1416500_at   | Sacm1l             | SAC1 (suppressor of actin mutations 1, homolog)-like (S. cerevisiae)                   | -1.04 | 0.545 | -1.03 | 0.653 | -1.17 | 0.125 | -1.08 | 0.177 | -1.08 |
| 1417812_a_at | Lamb3              | laminin, beta 3                                                                        | -1.06 | 0.925 | -1.15 | 0.881 | -1.03 | 0.944 | -1.47 | 0.295 | -1.18 |

|              |               |                                                                               |       |       |       |       |       |       |       |       |       |
|--------------|---------------|-------------------------------------------------------------------------------|-------|-------|-------|-------|-------|-------|-------|-------|-------|
| 1451185_at   | Sf3b5         | splicing factor 3b, subunit 5                                                 | -1.04 | 0.444 | -1.09 | 0.144 | -1.1  | 0.501 | -1.06 | 0.667 | -1.07 |
| 1423441_at   | Tfb2m         | transcription factor B2, mitochondrial                                        | -1.07 | 0.066 | -1.06 | 0.409 | -1.1  | 0.355 | -1.11 | 0.574 | -1.08 |
| 1426890_a_at | Rpap1         | RNA polymerase II associated protein 1                                        | -1.1  | 0.496 | -1.09 | 0.598 | -1.03 | 0.9   | -1.19 | 0.209 | -1.1  |
| 1451487_at   | Rabepk        | Rab9 effector protein with kelch motifs                                       | -1.03 | 0.698 | -1.02 | 0.878 | -1.19 | 0.406 | -1.25 | 0.362 | -1.12 |
| 1423567_a_at | PsmA7         | proteasome (prosome, macropain) subunit, alpha type 7                         | -1.16 | 0.022 | -1.05 | 0.438 | -1.03 | 0.778 | -1.16 | 0.442 | -1.1  |
| 1443955_at   | ---           | ---                                                                           | -1.13 | 0.467 | -1.01 | 0.835 | -1.1  | 0.723 | -1.18 | 0.333 | -1.1  |
| 1416495_s_at | Ndufs5        | NADH dehydrogenase (ubiquinone) Fe-S protein 5                                | -1.02 | 0.716 | -1.12 | 0.03  | -1.09 | 0.189 | -1.12 | 0.554 | -1.09 |
| 1457501_at   | LOC622665     | hypothetical protein LOC622665                                                | -1.05 | 0.896 | -1.15 | 0.738 | -1.03 | 0.907 | -1.55 | 0.177 | -1.2  |
| 1424078_s_at | Pex6          | peroxisomal biogenesis factor 6                                               | -1    | 0.986 | -1.21 | 0.168 | -1.03 | 0.599 | -1.33 | 0.152 | -1.14 |
| 1452953_at   | Fam18b        | family with sequence similarity 18, member B                                  | -1.08 | 0.22  | -1.01 | 0.873 | -1.15 | 0.192 | -1.04 | 0.794 | -1.07 |
| 1417827_at   | Ngly1         | N-glycanase 1                                                                 | -1.21 | 0.076 | -1.03 | 0.66  | -1    | 0.959 | -1.1  | 0.278 | -1.09 |
| 1434057_at   | Ndubf6        | NADH dehydrogenase (ubiquinone) 1 beta subcomplex, 6                          | -1.03 | 0.802 | -1.17 | 0.12  | -1.03 | 0.435 | -1.02 | 0.909 | -1.06 |
| 1435017_at   | Mel13         | melanoma nuclear protein 13                                                   | -1.04 | 0.483 | -1.05 | 0.492 | -1.14 | 0.141 | -1.53 | 0.142 | -1.19 |
| 1437391_x_at | Mrp144        | mitochondrial ribosomal protein L44                                           | -1.01 | 0.837 | -1.19 | 0.063 | -1.04 | 0.782 | -1.17 | 0.195 | -1.1  |
| 1448027_at   | 2010305B15Rik | RIKEN cDNA 2010305B15 gene                                                    | -1.02 | 0.904 | -1.13 | 0.454 | -1.08 | 0.632 | -1.42 | 0.372 | -1.16 |
| 1455175_at   | Phf13         | PHD finger protein 13                                                         | -1.06 | 0.363 | -1.1  | 0.658 | -1.07 | 0.476 | -1.52 | 0.246 | -1.19 |
| 1460436_at   | Ndst1         | N-deacetylase/N-sulfotransferase (heparan glucosaminyl) 1                     | -1.07 | 0.464 | -1.13 | 0.148 | -1.02 | 0.945 | -1.93 | 0.085 | -1.29 |
| 1420088_at   | Nfkb1a        | nuclear factor of kappa light chain gene enhancer in B-cells inhibitor, alpha | -1.07 | 0.845 | -1.03 | 0.783 | -1.13 | 0.069 | -1.51 | 0.096 | -1.18 |
| 1423791_at   | Ik            | IK cytokine                                                                   | -1.1  | 0.6   | -1.03 | 0.576 | -1.1  | 0.425 | -1.13 | 0.605 | -1.09 |
| 1419490_at   | AW049604      | expressed sequence AW049604                                                   | -1.22 | 0.338 | -1.01 | 0.974 | -1.02 | 0.914 | -1.4  | 0.651 | -1.16 |
| 1430969_at   | Mtch2         | mitochondrial carrier homolog 2 (C. elegans)                                  | -1.05 | 0.926 | -1.09 | 0.843 | -1.09 | 0.77  | -1.05 | 0.892 | -1.07 |
| 1426716_at   | Tdrd7         | tudor domain containing 7                                                     | -1.05 | 0.735 | -1.15 | 0.224 | -1.03 | 0.804 | -1.36 | 0.049 | -1.15 |
| 1425023_at   | Usp3          | ubiquitin specific peptidase 3                                                | -1.08 | 0.552 | -1.15 | 0.357 | -1    | 0.99  | -1.7  | 0.041 | -1.23 |
| 1442593_at   | ---           | ---                                                                           | -1.05 | 0.857 | -1.15 | 0.184 | -1.02 | 0.949 | -2.13 | 0.109 | -1.34 |
| 1448241_at   | Gm2a          | GM2 ganglioside activator protein                                             | -1.1  | 0.022 | -1.01 | 0.92  | -1.12 | 0.352 | -1.38 | 0.322 | -1.15 |
| 1434946_at   | C330021A05Rik | RIKEN cDNA C330021A05 gene                                                    | -1.22 | 0.448 | -1.01 | 0.983 | -1.02 | 0.925 | -1.15 | 0.521 | -1.1  |
| 1452066_a_at | Ndfip2        | Nedd4 family interacting protein 2                                            | -1.07 | 0.318 | -1.1  | 0.12  | -1.05 | 0.649 | -1.36 | 0.155 | -1.15 |
| 1435617_at   | AI480743      | expressed sequence AI480743                                                   | -1    | 0.999 | -1.19 | 0.226 | -1.05 | 0.765 | -1.44 | 0.111 | -1.17 |
| 1433447_x_at | Cct4          | chaperonin subunit 4 (delta)                                                  | -1.05 | 0.594 | -1.07 | 0.552 | -1.1  | 0.405 | -1.22 | 0.022 | -1.11 |
| 1447805_s_at | D11ErtD730e   | DNA segment, Chr 11, ERATO Doi 730, expressed                                 | -1.02 | 0.664 | -1.08 | 0.469 | -1.12 | 0.496 | -1.16 | 0.244 | -1.1  |
| 1448639_a_at | Spata5        | spermatogenesis associated 5                                                  | -1    | 0.968 | -1.2  | 0.406 | -1.03 | 0.648 | -1.1  | 0.611 | -1.09 |
| 1436178_at   | Leprel1       | leprecan-like 1                                                               | -1.05 | 0.677 | -1.02 | 0.975 | -1.16 | 0.607 | -1.27 | 0.172 | -1.12 |
| 1454704_at   | Scarb2        | scavenger receptor class B, member 2                                          | -1.01 | 0.95  | -1.02 | 0.849 | -1.2  | 0.46  | -1.25 | 0.481 | -1.12 |
| 1423335_at   | 1110004F10Rik | RIKEN cDNA 1110004F10 gene                                                    | -1.11 | 0.256 | -1.07 | 0.564 | -1.03 | 0.711 | -1.01 | 0.946 | -1.06 |
| 1448867_at   | Tmem9b        | TMEM9 domain family, member B                                                 | -1    | 0.971 | -1.02 | 0.805 | -1.22 | 0.106 | -1.15 | 0.274 | -1.1  |
| 1424616_s_at | Frag1         | FGF receptor activating protein 1                                             | -1.13 | 0.13  | -1.01 | 0.865 | -1.08 | 0.426 | -1.57 | 0.083 | -1.2  |
| 1451049_at   | Bcap31        | B-cell receptor-associated protein 31                                         | -1.03 | 0.544 | -1.08 | 0.266 | -1.11 | 0.153 | -1.03 | 0.862 | -1.06 |
| 1448178_a_at | Cct3          | chaperonin subunit 3 (gamma)                                                  | -1.13 | 0.243 | -1.08 | 0.437 | -1.01 | 0.91  | -1.13 | 0.1   | -1.09 |
| 1438289_a_at | Sumo1         | SMT3 suppressor of mif two 3 homolog 1 (yeast)                                | -1.01 | 0.938 | -1.02 | 0.858 | -1.22 | 0.028 | -1.39 | 0.092 | -1.16 |
| 1454776_at   | Ehmt1         | euchromatic histone methyltransferase 1                                       | -1.08 | 0.392 | -1.14 | 0.129 | -1.01 | 0.915 | -1.05 | 0.615 | -1.07 |
| 1436004_at   | Usp27x        | ubiquitin specific peptidase 27, X chromosome                                 | -1.19 | 0.546 | -1.02 | 0.947 | -1.03 | 0.849 | -1.08 | 0.714 | -1.08 |
| 1434056_a_at | Ndubf6        | NADH dehydrogenase (ubiquinone) 1 beta subcomplex, 6                          | -1.1  | 0.11  | -1.07 | 0.277 | -1.04 | 0.605 | -1.16 | 0.228 | -1.1  |
| 1454480_at   | 4933439N06Rik | RIKEN cDNA 4933439N06 gene                                                    | -1.02 | 0.949 | -1.16 | 0.787 | -1.05 | 0.845 | -1.26 | 0.653 | -1.12 |
| 1451051_a_at | Scyl1         | SCY1-like 1 (S. cerevisiae)                                                   | -1.11 | 0.161 | -1.09 | 0.234 | -1.02 | 0.901 | -1.18 | 0.179 | -1.1  |
| 1460235_at   | Scarb2        | scavenger receptor class B, member 2                                          | -1.04 | 0.884 | -1.07 | 0.626 | -1.12 | 0.346 | -1.16 | 0.535 | -1.09 |
| 1430594_at   | Rab11fip1     | RAB11 family interacting protein 1 (class I)                                  | -1.11 | 0.474 | -1.09 | 0.618 | -1.02 | 0.944 | -1.33 | 0.533 | -1.14 |
| 1416179_a_at | Rdx           | radixin                                                                       | -1.06 | 0.489 | -1.04 | 0.561 | -1.12 | 0.151 | -1.08 | 0.168 | -1.07 |
| 1428078_at   | 0610013E23Rik | RIKEN cDNA 0610013E23 gene                                                    | -1.18 | 0.459 | -1.05 | 0.727 | -1    | 1     | -1.33 | 0.171 | -1.14 |
| 1439268_x_at | Eif3s6        | eukaryotic translation initiation factor 3, subunit 6                         | -1.03 | 0.763 | -1.05 | 0.491 | -1.15 | 0.381 | -1.36 | 0.073 | -1.15 |
| 1421446_at   | Prkcc         | protein kinase C, gamma                                                       | -1    | 0.996 | -1.16 | 0.67  | -1.06 | 0.798 | -1.22 | 0.693 | -1.11 |
| 1433712_at   | AW555464      | expressed sequence AW555464                                                   | -1.05 | 0.787 | -1.09 | 0.348 | -1.07 | 0.342 | -1.04 | 0.79  | -1.06 |
| 1416522_a_at | Grcc10        | gene rich cluster, C10 gene                                                   | -1    | 0.977 | -1.1  | 0.234 | -1.12 | 0.46  | -1.7  | 0.194 | -1.23 |
| 1426307_at   | Cyb5r4        | cytochrome b5 reductase 4                                                     | -1.15 | 0.35  | -1.04 | 0.48  | -1.03 | 0.786 | -1.29 | 0.012 | -1.13 |

|              |               |                                                                                  |       |       |       |       |       |       |       |       |       |
|--------------|---------------|----------------------------------------------------------------------------------|-------|-------|-------|-------|-------|-------|-------|-------|-------|
| 1460135_at   | A930005H10Rik | RIKEN cDNA A930005H10 gene                                                       | -1.01 | 0.977 | -1.23 | 0.294 | -1    | 0.998 | -2.65 | 0.06  | -1.47 |
| 1424313_a_at | Ndufs7        | NADH dehydrogenase (ubiquinone) Fe-S protein 7                                   | -1.02 | 0.764 | -1.14 | 0.3   | -1.06 | 0.52  | -1.12 | 0.089 | -1.09 |
| 1442278_at   | Jarid1b       | Jumonji, AT rich interactive domain 1B (Rbp2 like)                               | -1.12 | 0.811 | -1.01 | 0.968 | -1.09 | 0.861 | -1.04 | 0.885 | -1.07 |
| 1460432_a_at | Eif3s6        | eukaryotic translation initiation factor 3, subunit 6                            | -1.1  | 0.002 | -1.01 | 0.847 | -1.11 | 0.446 | -1.29 | 0.155 | -1.13 |
| 1415920_at   | Cstf2t        | cleavage stimulation factor, 3' pre-RNA subunit 2, tau                           | -1.1  | 0.18  | -1.01 | 0.86  | -1.1  | 0.024 | -1.56 | 0.048 | -1.19 |
| 1418521_a_at | Mtx1          | metaxin 1                                                                        | -1.14 | 0.127 | -1.07 | 0.411 | -1.01 | 0.937 | -1.11 | 0.218 | -1.08 |
| 1432487_at   | 4930405H06Rik | RIKEN cDNA 4930405H06 gene                                                       | -1.02 | 0.958 | -1.06 | 0.873 | -1.13 | 0.576 | -1.31 | 0.317 | -1.13 |
| 1456324_at   | Zfp748        | zinc finger protein 748                                                          | -1.03 | 0.847 | -1.05 | 0.793 | -1.13 | 0.087 | -1.63 | 0.059 | -1.21 |
| 1460308_a_at | Ict1          | immature colon carcinoma transcript 1                                            | -1.03 | 0.826 | -1.11 | 0.02  | -1.07 | 0.67  | -1.37 | 0.146 | -1.14 |
| 1448363_at   | Yap1          | yes-associated protein 1                                                         | -1.02 | 0.494 | -1.18 | 0.068 | -1.02 | 0.859 | -1.15 | 0.643 | -1.09 |
| 1420473_at   | Mtpn          | myotrophin                                                                       | -1.02 | 0.902 | -1.03 | 0.7   | -1.17 | 0.135 | -1.37 | 0.195 | -1.15 |
| 1426111_x_at | Irf3          | interferon regulatory factor 3                                                   | -1.09 | 0.556 | -1.12 | 0.05  | -1.01 | 0.931 | -1.55 | 0.167 | -1.19 |
| 1457259_at   | ---           | ---                                                                              | -1.12 | 0.452 | -1.07 | 0.76  | -1.02 | 0.85  | -1.22 | 0.399 | -1.11 |
| 1436400_at   | ---           | ---                                                                              | -1.04 | 0.845 | -1.08 | 0.717 | -1.08 | 0.707 | -1.11 | 0.388 | -1.08 |
| 1433753_x_at | Eral1         | Era (G-protein)-like 1 (E. coli)                                                 | -1.03 | 0.831 | -1.09 | 0.502 | -1.09 | 0.609 | -1.38 | 0.147 | -1.15 |
| 1452852_at   | Twistnb       | TWIST neighbor                                                                   | -1.06 | 0.213 | -1.04 | 0.422 | -1.11 | 0.414 | -1.24 | 0.325 | -1.11 |
| 1437734_at   | Ppp1r12a      | protein phosphatase 1, regulatory (inhibitor) subunit 12A                        | -1.16 | 0.186 | -1    | 0.992 | -1.06 | 0.566 | -1.08 | 0.509 | -1.07 |
| 1426289_at   | 2610028H07Rik | RIKEN cDNA 2610028H07 gene                                                       | -1.07 | 0.492 | -1.1  | 0.348 | -1.04 | 0.82  | -1.1  | 0.567 | -1.08 |
| 1420834_at   | Vamp2         | vesicle-associated membrane protein 2                                            | -1.03 | 0.894 | -1.13 | 0.573 | -1.05 | 0.849 | -1.11 | 0.629 | -1.08 |
| 1454074_a_at | 1500011J06Rik | RIKEN cDNA 1500011J06 gene                                                       | -1.03 | 0.885 | -1.03 | 0.715 | -1.15 | 0.087 | -1.14 | 0.162 | -1.09 |
| 1418841_s_at | Cdc2l1        | cell division cycle 2-like 1                                                     | -1.06 | 0.73  | -1.12 | 0.03  | -1.03 | 0.753 | -1.29 | 0.089 | -1.12 |
| 1417844_at   | Med4          | mediator of RNA polymerase II transcription, subunit 4 homolog (yeast)           | -1.01 | 0.797 | -1.08 | 0.402 | -1.11 | 0.424 | -1.15 | 0.134 | -1.09 |
| 1455942_at   | Fbxl11        | F-box and leucine-rich repeat protein 11                                         | -1.01 | 0.927 | -1.09 | 0.6   | -1.11 | 0.552 | -1.13 | 0.221 | -1.09 |
| 1434844_at   | Hexdc         | hexosaminidase (glycosyl hydrolase family 20, catalytic domain) containing       | -1.13 | 0.551 | -1.08 | 0.515 | -1    | 0.982 | -1.54 | 0.188 | -1.19 |
| 1426537_at   | Narg2         | NMDA receptor-regulated gene 2                                                   | -1.04 | 0.918 | -1.09 | 0.617 | -1.07 | 0.712 | -1.75 | 0.085 | -1.24 |
| 1423096_at   | Capn7         | calpain 7                                                                        | -1.05 | 0.792 | -1.09 | 0.274 | -1.06 | 0.608 | -1.21 | 0.197 | -1.1  |
| 1456011_x_at | Acaa1a        | acetyl-Coenzyme A acyltransferase 1A                                             | -1.07 | 0.878 | -1.05 | 0.874 | -1.08 | 0.709 | -1.8  | 0.088 | -1.25 |
| 1454765_at   | Gtf3c3        | general transcription factor IIIC, polypeptide 3                                 | -1.11 | 0.546 | -1.09 | 0.591 | -1.01 | 0.984 | -1.05 | 0.352 | -1.06 |
| 1444607_at   | Cdsn          | Corneodesmosin                                                                   | -1    | 0.985 | -1.1  | 0.657 | -1.1  | 0.661 | -1.43 | 0.315 | -1.16 |
| 1424196_at   | Yipf1         | Yip1 domain family, member 1                                                     | -1.01 | 0.858 | -1.04 | 0.393 | -1.16 | 0.35  | -1.18 | 0.24  | -1.1  |
| 1436179_a_at | Dnajc5        | DnaJ (Hsp40) homolog, subfamily C, member 5                                      | -1.1  | 0.579 | -1.03 | 0.688 | -1.08 | 0.775 | -1.27 | 0.214 | -1.12 |
| 1455211_a_at | Timm13        | translocase of inner mitochondrial membrane 13 homolog (yeast)                   | -1    | 0.963 | -1.17 | 0.065 | -1.04 | 0.653 | -1.18 | 0.45  | -1.1  |
| 1451573_a_at | Stx4a         | syntaxin 4A (placental)                                                          | -1.1  | 0.641 | -1.01 | 0.947 | -1.1  | 0.486 | -1.3  | 0.222 | -1.12 |
| 1449842_at   | 1810059G22Rik | RIKEN cDNA 1810059G22 gene                                                       | -1.09 | 0.41  | -1.1  | 0.499 | -1.01 | 0.879 | -1.02 | 0.797 | -1.05 |
| 1416867_at   | Bet1          | blocked early in transport 1 homolog (S. cerevisiae)                             | -1.06 | 0.597 | -1.06 | 0.742 | -1.07 | 0.724 | -1.07 | 0.756 | -1.07 |
| 1435271_at   | Irf3          | interferon regulatory factor 3                                                   | -1.04 | 0.753 | -1.04 | 0.891 | -1.13 | 0.773 | -1.7  | 0.259 | -1.23 |
| 1452973_at   | Ppm1k         | protein phosphatase 1K (PP2C domain containing)                                  | -1.05 | 0.616 | -1.05 | 0.523 | -1.1  | 0.558 | -1.85 | 0.154 | -1.26 |
| 1455022_at   | Strn          | striatin, calmodulin binding protein                                             | -1.03 | 0.667 | -1.01 | 0.872 | -1.17 | 0.243 | -1.03 | 0.889 | -1.06 |
| 1418577_at   | Trim8         | tripartite motif protein 8                                                       | -1.1  | 0.68  | -1.07 | 0.767 | -1.03 | 0.856 | -1.3  | 0.23  | -1.12 |
| 1434441_at   | 1110018J18Rik | RIKEN cDNA 1110018J18 gene                                                       | -1.04 | 0.598 | -1.01 | 0.919 | -1.15 | 0.035 | -1.35 | 0.127 | -1.14 |
| 1428405_at   | Hcfc1r1       | host cell factor C1 regulator 1 (XPO1-dependent)                                 | -1.07 | 0.269 | -1.06 | 0.479 | -1.07 | 0.238 | -1.18 | 0.434 | -1.09 |
| 1430292_a_at | 1810030N24Rik | RIKEN cDNA 1810030N24 gene                                                       | -1.13 | 0.054 | -1.01 | 0.896 | -1.07 | 0.554 | -1.01 | 0.935 | -1.05 |
| 1423958_a_at | 2900001O04Rik | RIKEN cDNA 2900001O04 gene                                                       | -1.07 | 0.516 | -1.03 | 0.674 | -1.1  | 0.426 | -1.16 | 0.139 | -1.09 |
| 1436069_at   | Ing5          | inhibitor of growth family, member 5                                             | -1.16 | 0.416 | -1.04 | 0.775 | -1.01 | 0.91  | -1.03 | 0.839 | -1.06 |
| 1438631_x_at | Ttc13         | tetratricopeptide repeat domain 13                                               | -1.01 | 0.965 | -1    | 0.998 | -1.21 | 0.285 | -1.53 | 0.02  | -1.19 |
| 1418502_a_at | Oxr1          | oxidation resistance 1                                                           | -1.14 | 0.372 | -1.05 | 0.629 | -1.01 | 0.9   | -1.12 | 0.272 | -1.08 |
| 1434791_at   | Atp6v0a2      | ATPase, H+ transporting, lysosomal V0 subunit A2                                 | -1.08 | 0.53  | -1.11 | 0.404 | -1.02 | 0.932 | -1.03 | 0.901 | -1.06 |
| 1445059_at   | C80435        | expressed sequence C80435                                                        | -1.13 | 0.811 | -1.01 | 0.987 | -1.07 | 0.86  | -2.04 | 0.072 | -1.31 |
| 1460637_s_at | Pfdn5         | prefoldin 5                                                                      | -1.03 | 0.745 | -1.06 | 0.352 | -1.12 | 0.279 | -1.75 | 0.129 | -1.24 |
| 1437297_at   | Chd8          | chromodomain helicase DNA binding protein 8                                      | -1.02 | 0.873 | -1.03 | 0.769 | -1.16 | 0.237 | -1.39 | 0.159 | -1.15 |
| 1437730_at   | Ppp2r2a       | protein phosphatase 2 (formerly 2A), regulatory subunit B (PR 52), alpha isoform | -1.05 | 0.287 | -1.05 | 0.637 | -1.09 | 0.137 | -1.17 | 0.219 | -1.09 |
| 1433511_at   | 6330549H03Rik | RIKEN cDNA 6330549H03 gene                                                       | -1.08 | 0.726 | -1.11 | 0.757 | -1.01 | 0.922 | -1.16 | 0.326 | -1.09 |
| 1434022_at   | Zbtb33        | zinc finger and BTB domain containing 33                                         | -1.02 | 0.807 | -1.05 | 0.47  | -1.13 | 0.045 | -1.24 | 0.331 | -1.11 |

|              |               |                                                                                   |       |       |       |       |       |       |       |       |       |
|--------------|---------------|-----------------------------------------------------------------------------------|-------|-------|-------|-------|-------|-------|-------|-------|-------|
| 1423486_at   | Cript         | cysteine-rich PDZ-binding protein                                                 | -1.07 | 0.231 | -1.11 | 0.214 | -1.02 | 0.891 | -1.17 | 0.447 | -1.09 |
| 1428634_at   | Twistnb       | TWIST neighbor                                                                    | -1.05 | 0.563 | -1.08 | 0.551 | -1.07 | 0.687 | -1.12 | 0.426 | -1.08 |
| 1450904_at   | Tmem167       | transmembrane protein 167                                                         | -1.09 | 0.619 | -1.01 | 0.975 | -1.11 | 0.626 | -1.2  | 0.525 | -1.1  |
| 1418742_at   | Krt34         | keratin 34                                                                        | -1.01 | 0.959 | -1.16 | 0.669 | -1.03 | 0.835 | -1.16 | 0.549 | -1.09 |
| 1438071_at   | Pms1          | postmeiotic segregation increased 1 (S. cerevisiae)                               | -1.03 | 0.038 | -1.17 | 0.638 | -1    | 0.992 | -1.4  | 0.062 | -1.15 |
| 1421870_at   | Trim44        | tripartite motif-containing 44                                                    | -1.04 | 0.507 | -1.13 | 0.085 | -1.03 | 0.809 | -1.02 | 0.901 | -1.05 |
| 1423167_at   | Prei3         | preimplantation protein 3                                                         | -1.05 | 0.765 | -1.04 | 0.833 | -1.1  | 0.634 | -1.2  | 0.492 | -1.1  |
| 1444113_at   | ---           | Transcribed locus                                                                 | -1.06 | 0.796 | -1.05 | 0.734 | -1.09 | 0.587 | -1.57 | 0.044 | -1.19 |
| 1440268_at   | Trim41        | tripartite motif-containing 41                                                    | -1.1  | 0.49  | -1.01 | 0.97  | -1.09 | 0.602 | -1.03 | 0.892 | -1.06 |
| 1416813_at   | Tia1          | cytotoxic granule-associated RNA binding protein 1                                | -1.06 | 0.604 | -1.08 | 0.599 | -1.05 | 0.661 | -1.49 | 0.208 | -1.17 |
| 1443382_s_at | Btbd14b       | BTB (POZ) domain containing 14B                                                   | -1.03 | 0.846 | -1.17 | 0.757 | -1.01 | 0.966 | -1    | 0.984 | -1.05 |
| 1415980_at   | Atp5g2        | ATP synthase, H+ transporting, mitochondrial F0 complex, subunit c (subunit 9), i | -1.03 | 0.899 | -1.05 | 0.689 | -1.11 | 0.55  | -1.29 | 0.271 | -1.12 |
| 1426995_a_at | Gfer          | growth factor, erv1 (S. cerevisiae)-like (augmenter of liver regeneration)        | -1.02 | 0.907 | -1.1  | 0.183 | -1.07 | 0.653 | -1.01 | 0.908 | -1.05 |
| 1436027_at   | Osbpl11       | oxysterol binding protein-like 11                                                 | -1.1  | 0.705 | -1.01 | 0.942 | -1.09 | 0.583 | -1.37 | 0.054 | -1.14 |
| 1451020_at   | Gsk3b         | glycogen synthase kinase 3 beta                                                   | -1.11 | 0.581 | -1.05 | 0.649 | -1.03 | 0.779 | -1    | 0.992 | -1.05 |
| 1454614_at   | 1810013D10Rik | RIKEN cDNA 1810013D10 gene                                                        | -1.09 | 0.271 | -1.01 | 0.921 | -1.09 | 0.471 | -1.19 | 0.169 | -1.09 |
| 1424883_s_at | Sfrs7         | splicing factor, arginine/serine-rich 7                                           | -1.05 | 0.827 | -1.07 | 0.55  | -1.07 | 0.636 | -1.19 | 0.123 | -1.09 |
| 1428178_s_at | Trappc6b      | trafficking protein particle complex 6B                                           | -1.15 | 0.086 | -1.01 | 0.815 | -1.04 | 0.672 | -1.21 | 0.209 | -1.1  |
| 1426602_at   | Araf          | v-raf murine sarcoma 3611 viral oncogene homolog                                  | -1.01 | 0.96  | -1.07 | 0.575 | -1.11 | 0.348 | -1.08 | 0.671 | -1.07 |
| 1416538_at   | Siae          | sialic acid acetyltransferase                                                     | -1.1  | 0.232 | -1.08 | 0.521 | -1.02 | 0.932 | -1.05 | 0.798 | -1.06 |
| 1421859_at   | Adam17        | a disintegrin and metalloproteinase domain 17                                     | -1.11 | 0.188 | -1.03 | 0.841 | -1.05 | 0.819 | -1.36 | 0.107 | -1.14 |
| 1422849_a_at | Pabpn1        | poly(A) binding protein, nuclear 1                                                | -1.03 | 0.862 | -1.03 | 0.859 | -1.13 | 0.297 | -1.16 | 0.236 | -1.09 |
| 1417010_at   | Zfp238        | zinc finger protein 238                                                           | -1.03 | 0.491 | -1.02 | 0.862 | -1.15 | 0.049 | -1.75 | 0.051 | -1.24 |
| 1416526_a_at | Park7         | Parkinson disease (autosomal recessive, early onset) 7                            | -1.05 | 0.36  | -1.13 | 0.252 | -1.01 | 0.803 | -1.12 | 0.407 | -1.08 |
| 1417054_a_at | 0610009D07Rik | RIKEN cDNA 0610009D07 gene                                                        | -1.09 | 0.036 | -1.07 | 0.187 | -1.03 | 0.854 | -1.11 | 0.35  | -1.07 |
| 1451525_at   | Arhgap12      | Rho GTPase activating protein 12                                                  | -1.06 | 0.42  | -1.04 | 0.711 | -1.09 | 0.516 | -1.21 | 0.603 | -1.1  |
| 1450865_s_at | Mrps24        | mitochondrial ribosomal protein S24                                               | -1.08 | 0.5   | -1.01 | 0.77  | -1.1  | 0.618 | -1.04 | 0.788 | -1.06 |
| 1417029_a_at | Trim2         | tripartite motif protein 2                                                        | -1.16 | 0.603 | -1.01 | 0.981 | -1.02 | 0.918 | -1.08 | 0.818 | -1.07 |
| 1440799_s_at | Farp2         | FERM, RhoGEF and pleckstrin domain protein 2                                      | -1.03 | 0.89  | -1.05 | 0.741 | -1.11 | 0.662 | -1.09 | 0.815 | -1.07 |
| 1449343_s_at | Sin3a         | transcriptional regulator, SIN3A (yeast)                                          | -1.02 | 0.828 | -1.09 | 0.489 | -1.07 | 0.636 | -1.17 | 0.25  | -1.09 |
| 1450811_at   | Sprr2j        | small proline-rich protein 2J                                                     | -1.03 | 0.704 | -1.04 | 0.906 | -1.12 | 0.536 | -1.3  | 0.496 | -1.12 |
| 1421261_at   | Lipg          | lipase, endothelial                                                               | -1.02 | 0.961 | -1.04 | 0.847 | -1.12 | 0.697 | -1.27 | 0.231 | -1.11 |
| 1455141_at   | Tnrc6a        | trinucleotide repeat containing 6a                                                | -1.11 | 0.094 | -1.01 | 0.913 | -1.06 | 0.605 | -1.59 | 0.063 | -1.19 |
| 1447960_at   | 9630017O17    | hypothetical protein 9630017O17                                                   | -1.09 | 0.418 | -1.04 | 0.887 | -1.05 | 0.829 | -1.17 | 0.276 | -1.09 |
| 1448993_at   | Atg3          | autophagy-related 3 (yeast)                                                       | -1.07 | 0.243 | -1.11 | 0.262 | -1    | 0.979 | -1.29 | 0.262 | -1.12 |
| 1426999_at   | Zc3h14        | zinc finger CCCH type containing 14                                               | -1.06 | 0.529 | -1.08 | 0.081 | -1.04 | 0.81  | -1.11 | 0.439 | -1.07 |
| 1428874_at   | 1110019N10Rik | RIKEN cDNA 1110019N10 gene                                                        | -1.05 | 0.835 | -1.13 | 0.312 | -1    | 0.98  | -1.11 | 0.507 | -1.07 |
| 1451220_at   | 2310040A13Rik | RIKEN cDNA 2310040A13 gene                                                        | -1.08 | 0.575 | -1.09 | 0.258 | -1.01 | 0.835 | -1.34 | 0.095 | -1.13 |
| 1428645_at   | Gnai3         | guanine nucleotide binding protein, alpha inhibiting 3                            | -1.06 | 0.164 | -1.07 | 0.235 | -1.05 | 0.658 | -1.45 | 0.074 | -1.16 |
| 1417452_a_at | Fau           | Finkel-Biskis-Reilly murine sarcoma virus (FBR-MuSV) ubiquitously expressed (f    | -1.04 | 0.703 | -1.03 | 0.756 | -1.11 | 0.417 | -1.46 | 0.052 | -1.16 |
| 1426749_at   | Prmt3         | protein arginine N-methyltransferase 3                                            | -1.03 | 0.709 | -1.06 | 0.38  | -1.09 | 0.306 | -1.34 | 0.146 | -1.13 |
| 1418017_at   | Pum2          | pumilio 2 (Drosophila)                                                            | -1.12 | 0.146 | -1.01 | 0.952 | -1.05 | 0.681 | -1.05 | 0.597 | -1.06 |
| 1451520_at   | ---           | ---                                                                               | -1.02 | 0.869 | -1.09 | 0.394 | -1.07 | 0.836 | -1.32 | 0.435 | -1.12 |
| 1442830_at   | Nusap1        | Nucleolar and spindle associated protein 1                                        | -1.02 | 0.893 | -1.06 | 0.937 | -1.1  | 0.801 | -1.97 | 0.171 | -1.29 |
| 1427449_a_at | Adprhl2       | ADP-ribosylhydrolase like 2                                                       | -1.03 | 0.849 | -1.11 | 0.574 | -1.03 | 0.846 | -1.15 | 0.135 | -1.08 |
| 1455534_s_at | Osbpl11       | oxysterol binding protein-like 11                                                 | -1.08 | 0.542 | -1.05 | 0.676 | -1.05 | 0.747 | -1.31 | 0.042 | -1.12 |
| 1417348_at   | 2310039H08Rik | RIKEN cDNA 2310039H08 gene                                                        | -1.05 | 0.516 | -1.04 | 0.537 | -1.08 | 0.567 | -1.17 | 0.391 | -1.09 |
| 1452044_at   | Arpc5l        | actin related protein 2/3 complex, subunit 5-like                                 | -1.01 | 0.924 | -1.13 | 0.087 | -1.04 | 0.715 | -1.81 | 0.104 | -1.25 |
| 1436016_x_at | Gdi2          | guanosine diphosphate (GDP) dissociation inhibitor 2                              | -1.04 | 0.163 | -1    | 0.934 | -1.15 | 0.129 | -1.3  | 0.122 | -1.12 |
| 1449642_at   | Phgdhl1       | Phosphoglycerate dehydrogenase like 1                                             | -1.06 | 0.708 | -1.03 | 0.936 | -1.08 | 0.837 | -1.3  | 0.529 | -1.12 |
| 1424541_at   | Tmem70        | transmembrane protein 70                                                          | -1.1  | 0.168 | -1.02 | 0.805 | -1.05 | 0.592 | -1.01 | 0.929 | -1.05 |
| 1448224_at   | Tfam          | transcription factor A, mitochondrial                                             | -1.04 | 0.887 | -1.04 | 0.772 | -1.1  | 0.004 | -1.78 | 0.069 | -1.24 |
| 1417798_at   | 1810019J16Rik | RIKEN cDNA 1810019J16 gene                                                        | -1.01 | 0.966 | -1.02 | 0.951 | -1.16 | 0.278 | -1.45 | 0.535 | -1.16 |

|              |                    |                                                                                       |       |       |       |       |       |       |       |       |       |
|--------------|--------------------|---------------------------------------------------------------------------------------|-------|-------|-------|-------|-------|-------|-------|-------|-------|
| 1436783_x_at | Ywhab              | tyrosine 3-monooxygenase/tryptophan 5-monooxygenase activation protein, beta          | -1.05 | 0.428 | -1    | 0.958 | -1.12 | 0.429 | -1.07 | 0.512 | -1.06 |
| 1442372_at   | ---                | Transcribed locus                                                                     | -1.06 | 0.758 | -1.03 | 0.825 | -1.08 | 0.547 | -1.05 | 0.831 | -1.05 |
| 1436652_at   | 5830418K08Rik      | RIKEN cDNA 5830418K08 gene                                                            | -1.03 | 0.669 | -1.12 | 0.717 | -1.02 | 0.959 | -1.01 | 0.942 | -1.05 |
| 1426643_at   | Elp3               | elongation protein 3 homolog (S. cerevisiae)                                          | -1.11 | 0.13  | -1.02 | 0.701 | -1.04 | 0.525 | -1.28 | 0.04  | -1.11 |
| 1435865_at   | Hist3h2a           | histone 3, H2a                                                                        | -1.15 | 0.463 | -1.02 | 0.882 | -1.01 | 0.866 | -1.06 | 0.711 | -1.06 |
| 1428526_at   | Lsmd1              | LSM domain containing 1                                                               | -1.1  | 0.582 | -1.01 | 0.884 | -1.06 | 0.634 | -1.03 | 0.87  | -1.05 |
| 1424018_at   | Hint1              | histidine triad nucleotide binding protein 1                                          | -1.03 | 0.825 | -1.03 | 0.686 | -1.1  | 0.482 | -1.12 | 0.37  | -1.07 |
| 1450726_at   | Asah2              | N-acylsphingosine amidohydrolase 2                                                    | -1.03 | 0.777 | -1.06 | 0.593 | -1.08 | 0.626 | -1.04 | 0.775 | -1.05 |
| 1448240_at   | Mbtps1             | membrane-bound transcription factor peptidase, site 1                                 | -1.07 | 0.351 | -1.04 | 0.318 | -1.06 | 0.66  | -1.35 | 0.046 | -1.13 |
| 1454964_at   | BC021395           | cDNA sequence BC021395                                                                | -1.1  | 0.413 | -1.01 | 0.908 | -1.06 | 0.641 | -1.04 | 0.894 | -1.05 |
| 1435085_at   | Crebl2             | cAMP responsive element binding protein-like 2                                        | -1.04 | 0.867 | -1.08 | 0.646 | -1.05 | 0.622 | -1.23 | 0.501 | -1.1  |
| 1417032_at   | Ube2g2             | ubiquitin-conjugating enzyme E2G 2                                                    | -1.01 | 0.862 | -1.08 | 0.508 | -1.07 | 0.166 | -1.02 | 0.859 | -1.05 |
| 1426762_s_at | Aof2               | amine oxidase (flavin containing) domain 2                                            | -1.13 | 0.169 | -1.02 | 0.601 | -1.02 | 0.7   | -1.2  | 0.184 | -1.09 |
| 1426979_at   | MLXip              | MLX interacting protein                                                               | -1.09 | 0.792 | -1.06 | 0.584 | -1.01 | 0.953 | -1.58 | 0.247 | -1.19 |
| 1448917_at   | Thrap6             | thyroid hormone receptor associated protein 6                                         | -1.04 | 0.648 | -1.08 | 0.57  | -1.05 | 0.698 | -1.06 | 0.263 | -1.06 |
| 1425719_a_at | Nmi                | N-myc (and STAT) interactor                                                           | -1.07 | 0.499 | -1.02 | 0.839 | -1.08 | 0.349 | -1.52 | 0.19  | -1.17 |
| 1417136_s_at | Srpk2              | serine/arginine-rich protein specific kinase 2                                        | -1.06 | 0.511 | -1.06 | 0.747 | -1.04 | 0.657 | -1.47 | 0.397 | -1.16 |
| 1432094_a_at | 1700034M03Rik      | RIKEN cDNA 1700034M03 gene                                                            | -1.12 | 0.379 | -1    | 0.939 | -1.04 | 0.828 | -1.07 | 0.665 | -1.06 |
| 1423645_a_at | Ddx5               | DEAD (Asp-Glu-Ala-Asp) box polypeptide 5                                              | -1.07 | 0.782 | -1.01 | 0.908 | -1.08 | 0.353 | -1.33 | 0.253 | -1.12 |
| 1455058_at   | Mtmr9              | myotubularin related protein 9                                                        | -1.05 | 0.649 | -1.05 | 0.605 | -1.06 | 0.541 | -1.26 | 0.288 | -1.11 |
| 1420609_at   | 7-Mar              | membrane-associated ring finger (C3HC4) 7                                             | -1.08 | 0.741 | -1.08 | 0.336 | -1    | 0.989 | -1.37 | 0.21  | -1.13 |
| 1451184_at   | Hnrpa3 /// LOC5451 | heterogeneous nuclear ribonucleoprotein A3 /// similar to heterogeneous nuclear       | -1.05 | 0.259 | -1.03 | 0.677 | -1.09 | 0.336 | -1.2  | 0.038 | -1.09 |
| 1453342_at   | Cdc40              | cell division cycle 40 homolog (yeast)                                                | -1.06 | 0.076 | -1.09 | 0.267 | -1.02 | 0.865 | -1.34 | 0.068 | -1.13 |
| 1417468_at   | Nit1               | nitrilase 1                                                                           | -1.06 | 0.412 | -1.07 | 0.403 | -1.03 | 0.748 | -1.11 | 0.404 | -1.07 |
| 1428769_at   | Tatdn3             | TatD DNase domain containing 3                                                        | -1.12 | 0.268 | -1.02 | 0.899 | -1.02 | 0.875 | -1.03 | 0.88  | -1.05 |
| 1451025_at   | Arl1               | ADP-ribosylation factor-like 1                                                        | -1.08 | 0.225 | -1.03 | 0.424 | -1.05 | 0.485 | -1.31 | 0.16  | -1.12 |
| 1426481_at   | Klhl22             | kelch-like 22 (Drosophila)                                                            | -1.1  | 0.022 | -1.02 | 0.803 | -1.05 | 0.595 | -1.06 | 0.571 | -1.05 |
| 1429429_s_at | Pcmt1              | protein-L-isoaspartate (D-aspartate) O-methyltransferase domain containing 1          | -1    | 0.99  | -1.09 | 0.098 | -1.07 | 0.615 | -1.17 | 0.491 | -1.08 |
| 1438030_at   | Rasgrp3            | RAS, guanyl releasing protein 3                                                       | -1.07 | 0.607 | -1.03 | 0.904 | -1.06 | 0.847 | -1.5  | 0.294 | -1.16 |
| 1415727_at   | Apoa1bp            | apolipoprotein A-I binding protein                                                    | -1    | 0.996 | -1.08 | 0.61  | -1.08 | 0.492 | -1.14 | 0.573 | -1.08 |
| 1452023_at   | Asb16              | ankyrin repeat and SOCS box-containing 16                                             | -1.02 | 0.839 | -1.04 | 0.927 | -1.1  | 0.634 | -1.54 | 0.202 | -1.17 |
| 1435153_at   | Btbd6              | BTB (POZ) domain containing 6                                                         | -1.12 | 0.358 | -1.01 | 0.936 | -1.04 | 0.682 | -1.18 | 0.519 | -1.09 |
| 1434680_at   | Plekhg3            | pleckstrin homology domain containing, family G (with RhoGef domain) member 3         | -1.06 | 0.463 | -1.02 | 0.886 | -1.08 | 0.565 | -1.2  | 0.22  | -1.09 |
| 1455340_at   | AI852444           | Expressed sequence AI852444                                                           | -1.09 | 0.616 | -1.06 | 0.522 | -1.01 | 0.92  | -1.12 | 0.748 | -1.07 |
| 1437284_at   | Fzd1               | frizzled homolog 1 (Drosophila)                                                       | -1.09 | 0.257 | -1.07 | 0.691 | -1    | 0.995 | -1.1  | 0.769 | -1.06 |
| 1448287_at   | Rpo1-3             | RNA polymerase 1-3                                                                    | -1.12 | 0.444 | -1.02 | 0.716 | -1.02 | 0.907 | -1.15 | 0.468 | -1.08 |
| 1431766_x_at | Rps2               | ribosomal protein S2                                                                  | -1.1  | 0.218 | -1.03 | 0.859 | -1.03 | 0.486 | -1.2  | 0.003 | -1.09 |
| 1433475_a_at | C78339             | expressed sequence C78339                                                             | -1.01 | 0.703 | -1.01 | 0.941 | -1.15 | 0.146 | -1.38 | 0.013 | -1.14 |
| 1453206_at   | Acad9              | acyl-Coenzyme A dehydrogenase family, member 9                                        | -1.08 | 0.428 | -1.04 | 0.756 | -1.03 | 0.666 | -1.2  | 0.461 | -1.09 |
| 1431825_at   | Srpk3              | serine/arginine-rich protein specific kinase 3                                        | -1.04 | 0.73  | -1.04 | 0.91  | -1.07 | 0.746 | -1.93 | 0.151 | -1.27 |
| 1423789_at   | BC005624           | cDNA sequence BC005624                                                                | -1.06 | 0.65  | -1.03 | 0.642 | -1.06 | 0.667 | -1.41 | 0.031 | -1.14 |
| 1455348_x_at | Rpl29 /// LOC43335 | ribosomal protein L29 /// similar to 60S ribosomal protein L29 /// similar to 60S rib | -1    | 0.968 | -1.01 | 0.87  | -1.15 | 0.063 | -1.31 | 0.044 | -1.12 |
| 1425459_at   | Mtmr2              | myotubularin related protein 2                                                        | -1.08 | 0.715 | -1.02 | 0.885 | -1.05 | 0.776 | -1.08 | 0.695 | -1.06 |
| 1428080_at   | Pgam5              | phosphoglycerate mutase family member 5                                               | -1.04 | 0.686 | -1.04 | 0.48  | -1.06 | 0.607 | -1.14 | 0.294 | -1.07 |
| 1429596_at   | Slc7a6os           | solute carrier family 7, member 6 opposite strand                                     | -1.03 | 0.848 | -1.03 | 0.805 | -1.09 | 0.687 | -1.72 | 0.04  | -1.22 |
| 1454922_at   | AI553587           | expressed sequence AI553587                                                           | -1.01 | 0.848 | -1.11 | 0.294 | -1.04 | 0.855 | -1.03 | 0.802 | -1.05 |
| 1424275_s_at | Trim41             | tripartite motif-containing 41                                                        | -1.11 | 0.57  | -1.01 | 0.935 | -1.03 | 0.292 | -1.18 | 0.481 | -1.08 |
| 1421773_at   | Etv2               | ets variant gene 2                                                                    | -1.03 | 0.934 | -1.1  | 0.801 | -1.02 | 0.92  | -1.81 | 0.298 | -1.24 |
| 1418695_a_at | Kcmf1              | potassium channel modulatory factor 1                                                 | -1.02 | 0.817 | -1    | 0.858 | -1.13 | 0.054 | -1.04 | 0.48  | -1.05 |
| 1452971_at   | Upf3a              | UPF3 regulator of nonsense transcripts homolog A (yeast)                              | -1.02 | 0.929 | -1.1  | 0.706 | -1.03 | 0.867 | -1.14 | 0.269 | -1.07 |
| 1427022_at   | Ddx42              | DEAD (Asp-Glu-Ala-Asp) box polypeptide 42                                             | -1.01 | 0.944 | -1.02 | 0.898 | -1.12 | 0.387 | -1.04 | 0.825 | -1.05 |
| 1448295_at   | D13Wsu50e          | DNA segment, Chr 13, Wayne State University 50, expressed                             | -1.06 | 0.332 | -1.01 | 0.945 | -1.08 | 0.025 | -1.37 | 0.123 | -1.13 |
| 1421810_at   | Dgcr2              | DiGeorge syndrome critical region gene 2                                              | -1.15 | 0.264 | -1.01 | 0.936 | -1    | 0.994 | -1.21 | 0.292 | -1.09 |

|              |               |                                                                              |       |       |       |       |       |       |       |       |       |
|--------------|---------------|------------------------------------------------------------------------------|-------|-------|-------|-------|-------|-------|-------|-------|-------|
| 1423838_s_at | 2400003C14Rik | RIKEN cDNA 2400003C14 gene                                                   | -1.01 | 0.728 | -1.02 | 0.755 | -1.12 | 0.161 | -1.32 | 0.203 | -1.12 |
| 1420829_a_at | Ywhaq         | tyrosine 3-monooxygenase/tryptophan 5-monooxygenase activation protein, thet | -1.04 | 0.685 | -1.02 | 0.84  | -1.09 | 0.204 | -1.08 | 0.621 | -1.06 |
| 1427185_at   | Mef2a         | myocyte enhancer factor 2A                                                   | -1.05 | 0.791 | -1.02 | 0.659 | -1.07 | 0.703 | -1.31 | 0.292 | -1.11 |
| 1437852_x_at | Cpsf3         | cleavage and polyadenylation specificity factor 3                            | -1.02 | 0.928 | -1.1  | 0.202 | -1.02 | 0.846 | -1.68 | 0.133 | -1.21 |
| 1424473_at   | Polr2h        | polymerase (RNA) II (DNA directed) polypeptide H                             | -1.09 | 0.626 | -1.01 | 0.952 | -1.05 | 0.817 | -1.03 | 0.896 | -1.04 |
| 1456538_at   | Sdccag8       | serologically defined colon cancer antigen 8                                 | -1.01 | 0.933 | -1.06 | 0.534 | -1.08 | 0.568 | -1.5  | 0.088 | -1.16 |
| 1456748_a_at | Nipsnap1      | 4-nitrophenylphosphatase domain and non-neuronal SNAP25-like protein homolc  | -1.01 | 0.454 | -1.13 | 0.377 | -1.01 | 0.875 | -1.24 | 0.039 | -1.1  |
| 1433823_at   | AW456874      | expressed sequence AW456874                                                  | -1.02 | 0.872 | -1    | 1     | -1.13 | 0.726 | -1.13 | 0.708 | -1.07 |
| 1453380_a_at | Xrcc6bp1      | XRCC6 binding protein 1                                                      | -1.05 | 0.702 | -1.08 | 0.454 | -1.01 | 0.957 | -1.34 | 0.045 | -1.12 |
| 1437225_x_at | Gnai3         | guanine nucleotide binding protein, alpha inhibiting 3                       | -1.13 | 0.619 | -1    | 0.976 | -1.02 | 0.871 | -1.34 | 0.039 | -1.12 |
| 1460547_a_at | Hnrpk         | heterogeneous nuclear ribonucleoprotein K                                    | -1.02 | 0.747 | -1.01 | 0.896 | -1.12 | 0.014 | -1.05 | 0.128 | -1.05 |
| 1448115_at   | Htf9c         | HpalI tiny fragments locus 9c                                                | -1.02 | 0.381 | -1.01 | 0.926 | -1.12 | 0.498 | -1.18 | 0.086 | -1.08 |
| 1435230_at   | Ankrd12       | ankyrin repeat domain 12                                                     | -1.07 | 0.681 | -1.01 | 0.964 | -1.05 | 0.849 | -1.18 | 0.402 | -1.08 |
| 1441121_at   | Pcid2         | PCI domain containing 2                                                      | -1.01 | 0.985 | -1.01 | 0.902 | -1.13 | 0.505 | -1.1  | 0.562 | -1.06 |
| 1417174_at   | 1810021J13Rik | RIKEN cDNA 1810021J13 gene                                                   | -1.01 | 0.893 | -1.03 | 0.795 | -1.09 | 0.626 | -1.46 | 0.168 | -1.15 |
| 1450816_at   | Polg2         | polymerase (DNA directed), gamma 2, accessory subunit                        | -1.01 | 0.976 | -1.04 | 0.812 | -1.1  | 0.492 | -1.57 | 0.02  | -1.18 |
| 1460363_at   | Tnrc6c        | trinucleotide repeat containing 6C                                           | -1.04 | 0.729 | -1    | 0.987 | -1.1  | 0.622 | -1.56 | 0.082 | -1.18 |
| 1448495_at   | Tsta3         | tissue specific transplantation antigen P35B                                 | -1.02 | 0.87  | -1.02 | 0.803 | -1.09 | 0.479 | -1.33 | 0.086 | -1.12 |
| 1426903_at   | Fndc3a        | fibronectin type III domain containing 3a                                    | -1.01 | 0.952 | -1.05 | 0.569 | -1.08 | 0.559 | -1.43 | 0.383 | -1.14 |
| 1425323_a_at | BC008155      | cDNA sequence BC008155                                                       | -1.02 | 0.666 | -1.02 | 0.73  | -1.1  | 0.375 | -1.29 | 0.129 | -1.11 |
| 1426347_at   | 2010321M09Rik | RIKEN cDNA 2010321M09 gene                                                   | -1.03 | 0.87  | -1.08 | 0.155 | -1.03 | 0.708 | -1.15 | 0.178 | -1.07 |
| 1448345_at   | Tomm34        | translocase of outer mitochondrial membrane 34                               | -1.12 | 0.022 | -1    | 0.992 | -1.02 | 0.705 | -1.37 | 0.249 | -1.13 |
| 1451728_at   | Wdr13         | WD repeat domain 13                                                          | -1.08 | 0.427 | -1.01 | 0.908 | -1.04 | 0.795 | -1.14 | 0.546 | -1.07 |
| 1454998_at   | 120001118Rik  | RIKEN cDNA 120001118 gene                                                    | -1.06 | 0.568 | -1    | 0.999 | -1.07 | 0.645 | -1.07 | 0.496 | -1.05 |
| 1431704_a_at | Ralgs2        | Ral GEF with PH domain and SH3 binding motif 2                               | -1.07 | 0.768 | -1.06 | 0.557 | -1    | 0.988 | -2.48 | 0.143 | -1.4  |
| 1429476_s_at | Dnaj2         | DnaJ (Hsp40) homolog, subfamily A, member 2                                  | -1.08 | 0.227 | -1.04 | 0.465 | -1.01 | 0.874 | -1.1  | 0.223 | -1.06 |
| 1452587_at   | Actr2         | ARP2 actin-related protein 2 homolog (yeast)                                 | -1.06 | 0.484 | -1.04 | 0.515 | -1.03 | 0.726 | -1.43 | 0.15  | -1.14 |
| 1420633_a_at | Csn1s2a       | casein alpha s2-like A                                                       | -1    | 0.985 | -1.03 | 0.943 | -1.1  | 0.561 | -1.08 | 0.671 | -1.05 |
| 1439105_at   | Cdadcl1       | cytidine and dCMP deaminase domain containing 1                              | -1.08 | 0.609 | -1.04 | 0.91  | -1.01 | 0.964 | -1.18 | 0.382 | -1.08 |
| 1437838_x_at | Grsf1         | G-rich RNA sequence binding factor 1                                         | -1.06 | 0.684 | -1.05 | 0.309 | -1.01 | 0.738 | -1.04 | 0.568 | -1.04 |
| 1424652_at   | Tmem166       | transmembrane protein 166                                                    | -1.1  | 0.549 | -1    | 0.992 | -1.03 | 0.843 | -1.18 | 0.761 | -1.08 |
| 1422184_a_at | Ak1           | adenylate kinase 1                                                           | -1.06 | 0.818 | -1.03 | 0.901 | -1.03 | 0.846 | -1.59 | 0.053 | -1.18 |
| 1452084_at   | Zcchc17       | zinc finger, CCHC domain containing 17                                       | -1.05 | 0.381 | -1.02 | 0.799 | -1.05 | 0.798 | -1.08 | 0.54  | -1.05 |
| 1429155_at   | 4933411K20Rik | RIKEN cDNA 4933411K20 gene                                                   | -1    | 0.976 | -1.03 | 0.429 | -1.09 | 0.541 | -1.09 | 0.644 | -1.05 |
| 1448418_s_at | Wdr23         | WD repeat domain 23                                                          | -1.06 | 0.5   | -1.06 | 0.611 | -1    | 0.966 | -1.27 | 0.01  | -1.1  |
| 1426700_a_at | Usp52         | ubiquitin specific peptidase 52                                              | -1.04 | 0.015 | -1.04 | 0.623 | -1.04 | 0.9   | -1.11 | 0.544 | -1.06 |
| 1425936_a_at | Ankmy2        | ankyrin repeat and MYND domain containing 2                                  | -1.01 | 0.977 | -1.06 | 0.867 | -1.05 | 0.737 | -1.21 | 0.309 | -1.08 |
| 1434082_at   | ---           | ---                                                                          | -1.07 | 0.631 | -1.04 | 0.371 | -1    | 0.979 | -1.05 | 0.578 | -1.04 |
| 1455357_x_at | Tomm20        | translocase of outer mitochondrial membrane 20 homolog (yeast)               | -1.01 | 0.939 | -1.01 | 0.818 | -1.1  | 0.52  | -1.32 | 0.232 | -1.11 |
| 1431112_at   | Ulk3          | unc-51-like kinase 3 (C. elegans)                                            | -1.01 | 0.979 | -1.09 | 0.697 | -1.01 | 0.944 | -1.18 | 0.2   | -1.08 |
| 1433476_at   | C78339        | expressed sequence C78339                                                    | -1    | 0.999 | -1.04 | 0.135 | -1.08 | 0.478 | -1.38 | 0.033 | -1.12 |
| 1423455_at   | Ptma          | prothymosin alpha                                                            | -1.02 | 0.878 | -1.02 | 0.816 | -1.07 | 0.417 | -1.07 | 0.013 | -1.05 |
| 1441276_at   | Ptpkr         | protein tyrosine phosphatase, receptor type, K                               | -1.06 | 0.865 | -1.04 | 0.881 | -1.02 | 0.953 | -1.61 | 0.402 | -1.18 |
| 1419435_at   | Aox1          | aldehyde oxidase 1                                                           | -1.04 | 0.911 | -1.07 | 0.688 | -1.01 | 0.941 | -1.51 | 0.437 | -1.15 |
| 1426426_at   | Rbm13         | RNA binding motif protein 13                                                 | -1.02 | 0.533 | -1.03 | 0.779 | -1.06 | 0.635 | -1.25 | 0.125 | -1.09 |
| 1432430_a_at | 1700081L11Rik | RIKEN cDNA 1700081L11 gene                                                   | -1.03 | 0.947 | -1.02 | 0.95  | -1.06 | 0.89  | -1.44 | 0.025 | -1.14 |
| 1424753_at   | Nudt14        | nudix (nucleoside diphosphate linked moiety X)-type motif 14                 | -1.01 | 0.957 | -1.09 | 0.329 | -1.01 | 0.962 | -1.55 | 0.177 | -1.16 |
| 1437423_s_at | Sra1          | steroid receptor RNA activator 1                                             | -1.04 | 0.059 | -1.02 | 0.862 | -1.05 | 0.664 | -1.18 | 0.26  | -1.07 |
| 1423181_s_at | Clns1a        | chloride channel, nucleotide-sensitive, 1A                                   | -1.05 | 0.671 | -1.01 | 0.903 | -1.05 | 0.155 | -1.12 | 0.045 | -1.06 |
| 1436710_at   | Zswim4        | zinc finger, SWIM domain containing 4                                        | -1.05 | 0.864 | -1.03 | 0.823 | -1.02 | 0.904 | -1.04 | 0.723 | -1.04 |
| 1423114_at   | Ube2d3        | ubiquitin-conjugating enzyme E2D 3 (UBC4/5 homolog, yeast)                   | -1.04 | 0.697 | -1.06 | 0.533 | -1.01 | 0.959 | -1.08 | 0.292 | -1.05 |
| 1433040_at   | 2900018E21Rik | RIKEN cDNA 2900018E21 gene                                                   | -1.01 | 0.971 | -1.04 | 0.852 | -1.05 | 0.756 | -1.01 | 0.963 | -1.03 |
| 1418583_at   | Hint3         | histidine triad nucleotide binding protein 3                                 | -1.05 | 0.56  | -1.05 | 0.706 | -1.01 | 0.93  | -1.51 | 0.174 | -1.15 |

|              |                       |                                                                                               |       |       |       |       |       |       |       |       |       |
|--------------|-----------------------|-----------------------------------------------------------------------------------------------|-------|-------|-------|-------|-------|-------|-------|-------|-------|
| 1447302_at   | ---                   | Transcribed locus                                                                             | -1.01 | 0.929 | -1.03 | 0.939 | -1.06 | 0.889 | -1.77 | 0.394 | -1.22 |
| 1425528_at   | Prrx1                 | paired related homeobox 1                                                                     | -1.05 | 0.875 | -1    | 0.993 | -1.05 | 0.86  | -1.46 | 0.34  | -1.14 |
| 1425674_a_at | Ssu72                 | Ssu72 RNA polymerase II CTD phosphatase homolog (yeast)                                       | -1.03 | 0.515 | -1.07 | 0.411 | -1    | 1     | -1.48 | 0.135 | -1.15 |
| 1458181_at   | 9030624J02Rik         | RIKEN cDNA 9030624J02 gene                                                                    | -1.09 | 0.151 | -1    | 0.99  | -1.01 | 0.969 | -1.16 | 0.235 | -1.07 |
| 1454669_at   | Tmem11                | transmembrane protein 11                                                                      | -1.04 | 0.735 | -1.05 | 0.513 | -1    | 0.988 | -1.13 | 0.315 | -1.06 |
| 1416440_at   | Cd164                 | CD164 antigen                                                                                 | -1.08 | 0.422 | -1.01 | 0.945 | -1.01 | 0.748 | -1.06 | 0.779 | -1.04 |
| 1452734_at   | Rnaset2               | ribonuclease T2                                                                               | -1.05 | 0.445 | -1.04 | 0.696 | -1.01 | 0.898 | -1.37 | 0.149 | -1.12 |
| 1450988_at   | Lgr5                  | leucine rich repeat containing G protein coupled receptor 5                                   | -1.05 | 0.101 | -1.01 | 0.966 | -1.04 | 0.825 | -1.16 | 0.709 | -1.06 |
| 1422449_s_at | Rcn2                  | reticulocalbin 2                                                                              | -1.06 | 0.572 | -1.03 | 0.684 | -1    | 0.973 | -1.42 | 0.143 | -1.13 |
| 1449138_at   | Sf3b1                 | splicing factor 3b, subunit 1                                                                 | -1.07 | 0.254 | -1.01 | 0.939 | -1.02 | 0.931 | -1.28 | 0.307 | -1.09 |
| 1455581_x_at | 9530028C05            | hypothetical protein 9530028C05                                                               | -1.06 | 0.735 | -1.02 | 0.894 | -1.01 | 0.885 | -2.56 | 0.057 | -1.41 |
| 1452009_at   | 9130422G05Rik         | RIKEN cDNA 9130422G05 gene                                                                    | -1    | 0.999 | -1.02 | 0.742 | -1.06 | 0.688 | -1.28 | 0.372 | -1.09 |
| 1419317_x_at | 2310002A05Rik ///     | RIKEN cDNA 2310002A05 gene ///<br>small proline rich-like 1 ///<br>similar to late cornil     | -1    | 0.998 | -1.07 | 0.621 | -1.01 | 0.906 | -2.2  | 0.47  | -1.32 |
| 1429690_at   | 1300003B13Rik         | RIKEN cDNA 1300003B13 gene                                                                    | -1.06 | 0.69  | -1.01 | 0.964 | -1.01 | 0.933 | -1.99 | 0.144 | -1.27 |
| 1448353_x_at | Rpn1                  | ribophorin I                                                                                  | -1.03 | 0.845 | -1.03 | 0.805 | -1.02 | 0.774 | -1.04 | 0.725 | -1.03 |
| 1423880_at   | D10Wsu52e             | DNA segment, Chr 10, Wayne State University 52, expressed                                     | -1.02 | 0.821 | -1.06 | 0.307 | -1    | 0.977 | -1.65 | 0.057 | -1.18 |
| 1423132_a_at | 5730427N09Rik ///     | RIKEN cDNA 5730427N09 gene ///<br>similar to TGF beta-inducible nuclear protein               | -1.07 | 0.688 | -1.01 | 0.852 | -1    | 0.987 | -1.97 | 0.108 | -1.26 |
| 1429311_at   | Ube2q                 | ubiquitin-conjugating enzyme E2Q (putative)                                                   | -1.02 | 0.795 | -1.03 | 0.614 | -1.03 | 0.663 | -1.48 | 0.057 | -1.14 |
| 1430995_at   | ---                   | ---                                                                                           | -1.06 | 0.775 | -1    | 0.994 | -1.02 | 0.922 | -1.26 | 0.141 | -1.09 |
| 1416466_at   | Vapa                  | vesicle-associated membrane protein, associated protein A                                     | -1.06 | 0.282 | -1    | 0.975 | -1.02 | 0.873 | -1.03 | 0.787 | -1.03 |
| 1451216_at   | Zfp330                | zinc finger protein 330                                                                       | -1    | 0.965 | -1.06 | 0.57  | -1.02 | 0.849 | -1.33 | 0.079 | -1.1  |
| 1435223_at   | Spfh2                 | SPFH domain family, member 2                                                                  | -1.02 | 0.795 | -1.02 | 0.782 | -1.04 | 0.61  | -1.03 | 0.841 | -1.03 |
| 1416796_at   | Nck2                  | non-catalytic region of tyrosine kinase adaptor protein 2                                     | -1.01 | 0.889 | -1.04 | 0.836 | -1.03 | 0.752 | -1.29 | 0.116 | -1.09 |
| 1424139_at   | Rap1a                 | RAS-related protein-1a                                                                        | -1.04 | 0.746 | -1.03 | 0.559 | -1.01 | 0.93  | -1    | 0.962 | -1.02 |
| 1420321_at   | Rsad1                 | Radical S-adenosyl methionine domain containing 1                                             | -1.07 | 0.84  | -1    | 0.994 | -1.01 | 0.986 | -1.24 | 0.266 | -1.08 |
| 1435273_at   | Wars2                 | tryptophanyl tRNA synthetase 2 (mitochondrial)                                                | -1.01 | 0.973 | -1.01 | 0.925 | -1.05 | 0.718 | -1.05 | 0.662 | -1.03 |
| 1433542_at   | Inpp5f                | inositol polyphosphate-5-phosphatase F                                                        | -1.01 | 0.869 | -1.04 | 0.692 | -1.02 | 0.771 | -2    | 0.027 | -1.27 |
| 1436956_at   | Bace1                 | Beta-site APP cleaving enzyme 1                                                               | -1.02 | 0.672 | -1.04 | 0.69  | -1.01 | 0.95  | -1.08 | 0.494 | -1.04 |
| 1415737_at   | Rfk                   | riboflavin kinase                                                                             | -1.02 | 0.745 | -1.02 | 0.718 | -1.03 | 0.738 | -1.01 | 0.969 | -1.02 |
| 1415796_at   | Dazap2                | DAZ associated protein 2                                                                      | -1.02 | 0.783 | -1.02 | 0.776 | -1.01 | 0.885 | -1.29 | 0.071 | -1.09 |
| 1451036_at   | Spg21                 | spastic paraplegia 21 homolog (human)                                                         | -1.01 | 0.758 | -1.02 | 0.856 | -1.01 | 0.941 | -1.27 | 0.408 | -1.08 |
| 1455435_s_at | ---                   | ---                                                                                           | -1    | 0.995 | -1.03 | 0.562 | -1    | 0.997 | -1.37 | 0.199 | -1.1  |
| 1423262_a_at | H3f3a ///<br>LOC6233f | H3 histone, family 3A ///<br>similar to H3 histone, family 3B ///<br>similar to H3 histone, f | -1.01 | 0.946 | -1    | 0.886 | -1.02 | 0.822 | -1.03 | 0.834 | -1.02 |
| 1416094_at   | Adam9                 | a disintegrin and metallopeptidase domain 9 (meltrin gamma)                                   | -1.01 | 0.95  | -1.01 | 0.778 | -1    | 0.997 | -1.22 | 0.248 | -1.06 |
| 1437952_at   | AU040096              | expressed sequence AU040096                                                                   | -3.88 | 0.026 | -2.67 | 0.016 | -2.28 | 0.229 | 1.21  | 0.676 | -1.9  |
| 1441825_x_at | Ighmbp2               | Immunoglobulin mu binding protein 2                                                           | -2.78 | 0.041 | -3.42 | 0.02  | -2.36 | 0.079 | 1.32  | 0.594 | -1.81 |
| 1444636_at   | 4930592I03Rik         | RIKEN cDNA 4930592I03 gene                                                                    | -3.53 | 0.386 | -3.32 | 0.354 | -1.92 | 0.098 | 1.44  | 0.46  | -1.83 |
| 1454342_at   | C030007D22Rik         | RIKEN cDNA C030007D22 gene                                                                    | -3.06 | 0.064 | -3.29 | 0.111 | -2.08 | 0.142 | 1.56  | 0.489 | -1.72 |
| 1458434_at   | A730009L09Rik         | RIKEN cDNA A730009L09 gene                                                                    | -2.39 | 0.347 | -2.49 | 0.246 | -3.36 | 0.094 | 1.26  | 0.348 | -1.75 |
| 1421554_at   | Lmx1a                 | LIM homeobox transcription factor 1 alpha                                                     | -2.52 | 0.339 | -3.31 | 0.365 | -2.08 | 0.2   | 2.04  | 0.214 | -1.47 |
| 1432648_at   | 4930466F19Rik         | RIKEN cDNA 4930466F19 gene                                                                    | -4.79 | 0.161 | -1.85 | 0.233 | -2.26 | 0.29  | 1.29  | 0.745 | -1.9  |
| 1446030_at   | ---                   | Transcribed locus                                                                             | -1.98 | 0.162 | -2.62 | 0.019 | -2.92 | 0.001 | 3.54  | 0     | -1    |
| 1459633_at   | ---                   | ---                                                                                           | -2.29 | 0.394 | -3.99 | 0.072 | -1.81 | 0.229 | 2.03  | 0.255 | -1.51 |
| 1433153_at   | 9030201C23Rik         | RIKEN cDNA 9030201C23 gene                                                                    | -3.07 | 0.034 | -1.59 | 0.16  | -3.44 | 0.009 | 1.2   | 0.794 | -1.72 |
| 1450839_at   | D0H4S114              | DNA segment, human D4S114                                                                     | -1.16 | 0.748 | -4.7  | 0.021 | -5.42 | 0.005 | 1.06  | 0.729 | -2.56 |
| 1440705_at   | AU021720              | expressed sequence AU021720                                                                   | -3.05 | 0.029 | -4.24 | 0.009 | -1.44 | 0.499 | 1.73  | 0.464 | -1.75 |
| 1445454_at   | D2Ert282e             | DNA segment, Chr 2, ERATO Doi 282, expressed                                                  | -2.22 | 0.107 | -2.94 | 0.17  | -2.14 | 0.114 | 1.68  | 0.147 | -1.4  |
| 1432680_at   | 9130009M17Rik         | RIKEN cDNA 9130009M17 gene                                                                    | -2.48 | 0.008 | -2    | 0.336 | -2.78 | 0.064 | 2.83  | 0.339 | -1.11 |
| 1457261_at   | A930025H08Rik         | RIKEN cDNA A930025H08 gene                                                                    | -2.49 | 0.413 | -2.52 | 0.046 | -2.07 | 0.226 | 3.84  | 0.002 | -0.81 |
| 1458612_at   | A930006A01Rik         | RIKEN cDNA A930006A01 gene                                                                    | -4.1  | 0.009 | -2.92 | 0.021 | -1.4  | 0.493 | 1.23  | 0.566 | -1.8  |
| 1445496_at   | Auh                   | AU RNA binding protein/enoyl-coenzyme A hydratase                                             | -2.12 | 0.015 | -2.36 | 0.031 | -2.39 | 0.032 | 1.19  | 0.254 | -1.42 |
| 1457104_at   | D930036F22Rik         | RIKEN cDNA D930036F22 gene                                                                    | -2.66 | 0.154 | -2.38 | 0.028 | -1.92 | 0.149 | 1.04  | 0.918 | -1.48 |
| 1422328_at   | Gja10                 | gap junction membrane channel protein alpha 10                                                | -3.43 | 0.01  | -1.6  | 0.507 | -2.38 | 0.12  | 1.65  | 0.165 | -1.44 |

|              |                    |                                                                                  |       |       |       |       |       |       |       |       |       |
|--------------|--------------------|----------------------------------------------------------------------------------|-------|-------|-------|-------|-------|-------|-------|-------|-------|
| 1454228_a_at | Ccdc77             | coiled-coil domain containing 77                                                 | -2.51 | 0.009 | -3.06 | 0.137 | -1.63 | 0.485 | 1.31  | 0.441 | -1.47 |
| 1441012_at   | Hip2               | Huntingtin interacting protein 2                                                 | -4.03 | 0.092 | -2.13 | 0.519 | -1.6  | 0.197 | 2.54  | 0.326 | -1.3  |
| 1453503_at   | 9230117E20Rik      | RIKEN cDNA 9230117E20 gene                                                       | -3.09 | 0.052 | -2.84 | 0.097 | -1.48 | 0.149 | 1.14  | 0.572 | -1.57 |
| 1417899_at   | Zp3r               | zona pellucida 3 receptor                                                        | -2.52 | 0.065 | -4.09 | 0.087 | -1.4  | 0.43  | 3.65  | 0.004 | -1.09 |
| 1442589_at   | Trpc5              | Transient receptor potential cation channel, subfamily C, member 5               | -3.2  | 0.096 | -3.74 | 0.024 | -1.28 | 0.474 | 1.38  | 0.419 | -1.71 |
| 1458699_at   | Ccrn4l             | CCR4 carbon catabolite repression 4-like (S. cerevisiae)                         | -2.98 | 0.38  | -2    | 0.221 | -1.89 | 0.123 | 4.28  | 0.168 | -0.65 |
| 1442097_at   | ---                | 0 day neonate kidney cDNA, RIKEN full-length enriched library, clone:D630011L    | -2.29 | 0.128 | -3.07 | 0.002 | -1.65 | 0.5   | 1.15  | 0.814 | -1.46 |
| 1446492_at   | Tmem132d           | transmembrane protein 132D                                                       | -3.38 | 0.095 | -1.86 | 0.344 | -1.86 | 0.03  | 1.29  | 0.211 | -1.45 |
| 1421984_at   | Stc1               | stanniocalcin 1                                                                  | -2.07 | 0.102 | -2.55 | 0.012 | -1.99 | 0.101 | 3.82  | 0.008 | -0.7  |
| 1444327_at   | Edd1               | E3 ubiquitin protein ligase, HECT domain containing, 1                           | -2.41 | 0.43  | -3.91 | 0.001 | -1.4  | 0.278 | 1.27  | 0.712 | -1.61 |
| 1430973_at   | Zfp558             | zinc finger protein 558                                                          | -3.82 | 0.002 | -1.66 | 0.331 | -1.89 | 0.246 | 1.37  | 0.664 | -1.5  |
| 1453935_a_at | Ccdc7              | coiled-coil domain containing 7                                                  | -2.07 | 0.156 | -2.1  | 0.413 | -2.32 | 0.017 | 2.02  | 0.121 | -1.12 |
| 1432980_at   | 5730420F10Rik      | RIKEN cDNA 5730420F10 gene                                                       | -1.39 | 0.526 | -2.37 | 0.242 | -3.97 | 0.055 | 2.22  | 0.265 | -1.38 |
| 1451898_a_at | Sema6c             | sema domain, transmembrane domain (TM), and cytoplasmic domain, (semapho         | -4.47 | 0.002 | -1.58 | 0.233 | -1.87 | 0.169 | 2.39  | 0.064 | -1.38 |
| 1449493_at   | Ins15              | insulin-like 5                                                                   | -1.96 | 0.126 | -2.49 | 0.004 | -2.05 | 0.395 | 1.29  | 0.58  | -1.3  |
| 1447769_x_at | Amigo2             | adhesion molecule with Ig like domain 2                                          | -1.37 | 0.282 | -1.89 | 0.348 | -7.1  | 0.067 | 1.12  | 0.759 | -2.31 |
| 1419229_at   | Rhox4b /// Rhox4e  | reproductive homeobox 4B /// reproductive homeobox 4E /// reproductive homeot    | -3.61 | 0.054 | -2.39 | 0.039 | -1.41 | 0.119 | 1.15  | 0.796 | -1.56 |
| 1433276_at   | 4930556A12Rik      | RIKEN cDNA 4930556A12 gene                                                       | -4.14 | 0.341 | -2.09 | 0.099 | -1.44 | 0.461 | 1.06  | 0.904 | -1.65 |
| 1421591_at   | Cylc1              | cylicin, basic protein of sperm head cytoskeleton 1                              | -2.27 | 0.471 | -2.19 | 0.178 | -1.93 | 0.297 | 1.38  | 0.567 | -1.25 |
| 1433346_at   | 5830432F11Rik      | RIKEN cDNA 5830432F11 gene                                                       | -2.24 | 0.449 | -1.87 | 0.067 | -2.26 | 0.388 | 1.72  | 0.23  | -1.16 |
| 1438909_at   | Scppdh             | saccharopine dehydrogenase (putative)                                            | -1.79 | 0.269 | -2.44 | 0.171 | -2.19 | 0.037 | 1.78  | 0.101 | -1.16 |
| 1422248_at   | Irs4 /// LOC669982 | insulin receptor substrate 4 /// similar to insulin receptor substrate 4         | -2.35 | 0.344 | -2.05 | 0.088 | -1.95 | 0.172 | 2.78  | 0.375 | -0.89 |
| 1439720_at   | Ralgs1             | Ral GEF with PH domain and SH3 binding motif 1                                   | -3.83 | 0.393 | -2.39 | 0.2   | -1.33 | 0.563 | 1.56  | 0.373 | -1.5  |
| 1454190_at   | 9630013K17Rik      | RIKEN cDNA 9630013K17 gene                                                       | -1.66 | 0.055 | -2.79 | 0.026 | -2.13 | 0.258 | 1.03  | 0.943 | -1.39 |
| 1460368_at   | Mpp4               | membrane protein, palmitoylated 4 (MAGUK p55 subfamily member 4)                 | -2.42 | 0.171 | -2.2  | 0.187 | -1.77 | 0.389 | 1.84  | 0.282 | -1.14 |
| 1442559_at   | ---                | 10 days neonate cerebellum cDNA, RIKEN full-length enriched library, clone:B93   | -2.78 | 0.26  | -1.4  | 0.299 | -2.78 | 0     | 1.12  | 0.828 | -1.46 |
| 1431373_at   | Pop5               | processing of precursor 5, ribonuclease P/MRP family (S. cerevisiae)             | -5.01 | 0.005 | -1.57 | 0.608 | -1.67 | 0.172 | 2.73  | 0.287 | -1.38 |
| 1436643_x_at | Hamp2              | hepcidin antimicrobial peptide 2                                                 | -2.77 | 0.027 | -2.13 | 0.321 | -1.65 | 0.034 | 16.19 | 0.142 | 2.41  |
| 1445262_at   | ---                | ---                                                                              | -2.97 | 0.064 | -1.45 | 0.572 | -2.43 | 0.03  | 1.64  | 0.573 | -1.3  |
| 1442565_at   | Pcdh10             | protocadherin 10                                                                 | -1.97 | 0.312 | -2.25 | 0.113 | -2.03 | 0.298 | 2.56  | 0.223 | -0.92 |
| 1417746_at   | Cplx1              | complexin 1                                                                      | -1.34 | 0.532 | -4.87 | 0.001 | -2    | 0.392 | 1.09  | 0.726 | -1.78 |
| 1439409_x_at | Tyrp1              | tyrosinase-related protein 1                                                     | -1.44 | 0.316 | -3.14 | 0.035 | -2.28 | 0.267 | 1.27  | 0.336 | -1.4  |
| 1419904_at   | ---                | Adult male corpora quadrigemina cDNA, RIKEN full-length enriched library, clone  | -2.07 | 0.24  | -1.93 | 0.174 | -2.18 | 0.016 | 1.9   | 0.13  | -1.07 |
| 1447044_at   | ---                | ---                                                                              | -2.2  | 0.123 | -2.11 | 0.38  | -1.87 | 0.371 | 2.25  | 0.345 | -0.98 |
| 1440118_at   | D11Ert333e         | DNA segment, Chr 11, ERATO Doi 333, expressed                                    | -3.82 | 0.443 | -2.72 | 0.138 | -1.2  | 0.134 | 1.2   | 0.524 | -1.63 |
| 1459081_at   | 1700007B14Rik      | RIKEN cDNA 1700007B14 gene                                                       | -3.23 | 0.068 | -3.54 | 0.024 | -1.15 | 0.764 | 2.49  | 0.294 | -1.36 |
| 1431438_at   | C530001K22Rik      | RIKEN cDNA C530001K22 gene                                                       | -1.72 | 0.191 | -2.52 | 0.057 | -2.05 | 0.231 | 1.18  | 0.281 | -1.28 |
| 1440232_at   | LOC622645 /// LOC  | similar to KIAA1913 /// similar to KIAA1913                                      | -3.39 | 0.014 | -1.82 | 0.072 | -1.6  | 0.226 | 1.64  | 0.041 | -1.29 |
| 1446263_at   | AU015619           | expressed sequence AU015619                                                      | -2.77 | 0.38  | -1.29 | 0.66  | -2.91 | 0.151 | 1.27  | 0.61  | -1.43 |
| 1460470_at   | Acoxl              | acyl-Coenzyme A oxidase-like                                                     | -1.56 | 0.569 | -2.68 | 0.031 | -2.15 | 0.005 | 1.07  | 0.918 | -1.33 |
| 1446686_at   | Dnajc11            | DnaJ (Hsp40) homolog, subfamily C, member 11                                     | -1.75 | 0.374 | -2.45 | 0.161 | -1.98 | 0.074 | 1.54  | 0.339 | -1.16 |
| 1454308_at   | LOC385154 /// LOC  | similar to development- and differentiation-enhancing factor 2; PYK2 C terminus- | -3.63 | 0.136 | -1.19 | 0.627 | -2.7  | 0.048 | 1.32  | 0.411 | -1.55 |
| 1431581_at   | 4922502B01Rik      | RIKEN cDNA 4922502B01 gene                                                       | -1.59 | 0.12  | -2.7  | 0.08  | -2.03 | 0.279 | 1.92  | 0.069 | -1.1  |
| 1428055_at   | Rian               | RNA imprinted and accumulated in nucleus                                         | -1.85 | 0.504 | -4.59 | 0.145 | -1.35 | 0.627 | 1.51  | 0.615 | -1.57 |
| 1442081_at   | AU017455           | Expressed sequence AU017455                                                      | -2.27 | 0.116 | -2.04 | 0.239 | -1.74 | 0.201 | 2.03  | 0.097 | -1    |
| 1456268_at   | Cks1b              | CDC28 protein kinase 1b                                                          | -2.68 | 0.054 | -1.39 | 0.419 | -2.42 | 0.225 | 1.12  | 0.776 | -1.34 |
| 1429997_at   | 4832441B07Rik      | RIKEN cDNA 4832441B07 gene                                                       | -2.1  | 0.101 | -1.96 | 0.479 | -1.93 | 0.042 | 1.48  | 0.507 | -1.13 |
| 1420137_at   | ---                | ---                                                                              | -2.56 | 0.17  | -2.14 | 0.047 | -1.53 | 0.365 | 2.04  | 0.249 | -1.05 |
| 1420759_s_at | Zfy1 /// Zfy2      | zinc finger protein 1, Y linked /// zinc finger protein 2, Y linked              | -2.35 | 0.488 | -2.72 | 0.205 | -1.39 | 0.275 | 1.18  | 0.631 | -1.32 |
| 1442091_at   | ---                | Transcribed locus                                                                | -3.53 | 0.028 | -1.42 | 0.467 | -1.9  | 0.032 | 1.36  | 0.424 | -1.37 |
| 1442318_at   | ---                | Transcribed locus                                                                | -2.39 | 0.293 | -2.73 | 0.085 | -1.37 | 0.381 | 1.35  | 0.62  | -1.28 |
| 1439854_at   | Hrk                | harakiri, BCL2 interacting protein (contains only BH3 domain)                    | -2.6  | 0.473 | -1.9  | 0.143 | -1.65 | 0.415 | 1.85  | 0.521 | -1.07 |
| 1449703_at   | Zfand2a            | Zinc finger, AN1-type domain 2A                                                  | -1.93 | 0.512 | -1.54 | 0.471 | -2.85 | 0.138 | 2.08  | 0.032 | -1.06 |

|              |                   |                                                                                  |       |       |       |       |       |       |       |       |       |
|--------------|-------------------|----------------------------------------------------------------------------------|-------|-------|-------|-------|-------|-------|-------|-------|-------|
| 1433323_at   | 4930529F21Rik     | RIKEN cDNA 4930529F21 gene                                                       | -1.48 | 0.108 | -3.04 | 0.166 | -1.94 | 0.164 | 1.45  | 0.46  | -1.25 |
| 1453637_at   | 5430410E06Rik     | RIKEN cDNA 5430410E06 gene                                                       | -1.74 | 0.255 | -2.53 | 0.048 | -1.79 | 0.183 | 1.7   | 0.267 | -1.09 |
| 1440949_at   | ---               | ---                                                                              | -2.51 | 0.2   | -1.85 | 0.161 | -1.69 | 0.088 | 1.02  | 0.974 | -1.26 |
| 1442600_at   | ---               | ---                                                                              | -2.81 | 0.069 | -2.19 | 0.125 | -1.39 | 0.33  | 1.07  | 0.615 | -1.33 |
| 1458687_at   | LOC668172 /// LOC | hypothetical protein LOC668172 /// hypothetical protein LOC672498 /// hypothetic | -3.63 | 0.299 | -1.84 | 0.406 | -1.4  | 0.347 | 1.05  | 0.871 | -1.46 |
| 1454600_at   | 9530086P17Rik     | RIKEN cDNA 9530086P17 gene                                                       | -3.06 | 0.026 | -2.71 | 0.18  | -1.19 | 0.665 | 1.18  | 0.776 | -1.44 |
| 1441602_at   | 1110005A03Rik     | RIKEN cDNA 1110005A03 gene                                                       | -4.24 | 0.022 | -3.05 | 0.187 | -1.03 | 0.943 | 1.13  | 0.841 | -1.8  |
| 1446009_at   | LOC240444         | Similar to Potassium voltage-gated channel subfamily G member 2 (Voltage-gate    | -2.58 | 0.163 | -1.91 | 0.028 | -1.59 | 0.334 | 1.27  | 0.423 | -1.2  |
| 1432175_at   | 5430434I15Rik     | RIKEN cDNA 5430434I15 gene                                                       | -1.43 | 0.467 | -3.21 | 0.006 | -1.89 | 0.133 | 1.83  | 0.028 | -1.17 |
| 1432364_at   | 4930556N13Rik     | RIKEN cDNA 4930556N13 gene                                                       | -1.35 | 0.75  | -2.2  | 0.002 | -2.84 | 0.148 | 1.36  | 0.642 | -1.26 |
| 1444964_at   | Csnk1g1           | casein kinase 1, gamma 1                                                         | -5.44 | 0.054 | -1.24 | 0.738 | -1.79 | 0.043 | 1.55  | 0.157 | -1.73 |
| 1444957_at   | Pspc1             | Paraspeckle protein 1                                                            | -3.47 | 0.123 | -1.08 | 0.908 | -2.95 | 0.077 | 1.3   | 0.618 | -1.55 |
| 1445851_at   | ---               | ---                                                                              | -2.23 | 0.092 | -1.88 | 0.103 | -1.75 | 0.258 | 1.27  | 0.679 | -1.15 |
| 1456982_at   | 6430562O15Rik     | RIKEN cDNA 6430562O15 gene                                                       | -2.01 | 0.219 | -1.5  | 0.031 | -2.53 | 0.085 | 1.08  | 0.896 | -1.24 |
| 1444146_at   | Rnf20             | ring finger protein 20                                                           | -2.26 | 0.182 | -2.42 | 0.005 | -1.42 | 0.503 | 1.1   | 0.75  | -1.25 |
| 1437011_x_at | Oaz3              | ornithine decarboxylase antizyme 3                                               | -1.7  | 0.446 | -2.27 | 0.174 | -1.88 | 0.271 | 1.71  | 0.513 | -1.03 |
| 1457778_at   | Stox2             | storkhead box 2                                                                  | -2.68 | 0.062 | -2.16 | 0.302 | -1.38 | 0.607 | 1.01  | 0.989 | -1.3  |
| 1431483_at   | 4930544M13Rik     | RIKEN cDNA 4930544M13 gene                                                       | -1.72 | 0.574 | -1.7  | 0.351 | -2.54 | 0.273 | 1.41  | 0.614 | -1.14 |
| 1435215_at   | Ap1gbp1           | AP1 gamma subunit binding protein 1                                              | -4.08 | 0.067 | -1.54 | 0.396 | -1.49 | 0.388 | 1.46  | 0.331 | -1.41 |
| 1451808_at   | Kcnj4             | potassium inwardly-rectifying channel, subfamily J, member 4                     | -3.12 | 0.35  | -1.6  | 0.472 | -1.6  | 0.075 | 1.56  | 0.435 | -1.19 |
| 1442345_at   | 1700031L13Rik     | RIKEN cDNA 1700031L13 gene                                                       | -2.07 | 0.531 | -2.01 | 0.431 | -1.7  | 0.371 | 1.26  | 0.692 | -1.13 |
| 1440749_at   | Map3k13           | Mitogen-activated protein kinase kinase 13                                       | -2.44 | 0.085 | -1.96 | 0.019 | -1.53 | 0.428 | 1.12  | 0.876 | -1.2  |
| 1429388_at   | Nanog             | Nanog homeobox                                                                   | -1.51 | 0.562 | -1.72 | 0.231 | -3.01 | 0     | 1.06  | 0.758 | -1.29 |
| 1419411_at   | Tac2              | tachykinin 2                                                                     | -2.12 | 0.358 | -1.59 | 0.071 | -2.08 | 0.24  | 11.54 | 0.237 | 1.43  |
| 1456725_x_at | Vil2              | villin 2                                                                         | -6.99 | 0.019 | -1.65 | 0.147 | -1.2  | 0.579 | 2.07  | 0.077 | -1.94 |
| 1430760_a_at | Usp50             | ubiquitin specific peptidase 50                                                  | -2.42 | 0.046 | -2.12 | 0.172 | -1.43 | 0.538 | 1.47  | 0.598 | -1.13 |
| 1420805_at   | Mylc2pl           | myosin light chain 2, precursor lymphocyte-specific                              | -3.46 | 0.407 | -1.09 | 0.486 | -2.68 | 0.015 | 1.65  | 0.101 | -1.39 |
| 1445754_at   | Acacb             | Acetyl-Coenzyme A carboxylase beta                                               | -1.45 | 0.08  | -1.89 | 0.149 | -2.73 | 0.044 | 1.35  | 0.512 | -1.18 |
| 1432702_at   | 2810403G07Rik     | RIKEN cDNA 2810403G07 gene                                                       | -2.76 | 0.078 | -1.52 | 0.507 | -1.76 | 0.127 | 1.32  | 0.592 | -1.18 |
| 1428525_at   | 4930488B01Rik     | RIKEN cDNA 4930488B01 gene                                                       | -4.63 | 0.004 | -1.11 | 0.734 | -2.11 | 0.156 | 1.18  | 0.803 | -1.67 |
| 1440109_at   | D7Etd413e         | DNA segment, Chr 7, ERATO Doi 413, expressed                                     | -1.43 | 0.642 | -3.41 | 0.071 | -1.67 | 0.24  | 1.71  | 0.202 | -1.2  |
| 1449540_at   | Rhox9             | reproductive homeobox 9                                                          | -3.32 | 0.023 | -1.44 | 0.24  | -1.69 | 0.301 | 1.03  | 0.958 | -1.35 |
| 1451772_at   | Tpcn1             | two pore channel 1                                                               | -3.08 | 0.271 | -1.76 | 0.444 | -1.42 | 0.378 | 2.5   | 0.036 | -0.94 |
| 1449873_at   | Bmp8a             | bone morphogenetic protein 8a                                                    | -1.45 | 0.29  | -1.6  | 0.597 | -3.6  | 0.099 | 1.07  | 0.93  | -1.39 |
| 1446777_at   | Spp2              | Secreted phosphoprotein 2                                                        | -2.24 | 0.313 | -1.96 | 0.309 | -1.55 | 0.231 | 2.8   | 0.001 | -0.74 |
| 1437081_at   | Timp2             | Tissue inhibitor of metalloproteinase 2                                          | -1.78 | 0.26  | -2.61 | 0.361 | -1.52 | 0.325 | 2.04  | 0.012 | -0.97 |
| 1432979_at   | Gata2b            | GATA zinc finger domain containing 2B                                            | -2.48 | 0.457 | -2.6  | 0.112 | -1.23 | 0.748 | 1.51  | 0.61  | -1.2  |
| 1460059_at   | Upp2              | uridine phosphorylase 2                                                          | -1.36 | 0.018 | -2.46 | 0.27  | -2.17 | 0.288 | 1.16  | 0.088 | -1.21 |
| 1447482_at   | 5830457H20Rik     | RIKEN cDNA 5830457H20 gene                                                       | -2.23 | 0.046 | -2.63 | 0.139 | -1.29 | 0.615 | 1.06  | 0.926 | -1.27 |
| 1446401_at   | Atrnl1            | Attractin like 1                                                                 | -2    | 0.459 | -1.77 | 0.175 | -1.85 | 0.42  | 2.78  | 0.037 | -0.71 |
| 1460504_at   | ---               | ---                                                                              | -2.19 | 0.463 | -1.6  | 0.523 | -1.91 | 0.161 | 1.12  | 0.732 | -1.15 |
| 1447607_at   | ---               | ---                                                                              | -2.41 | 0.228 | -1.57 | 0.163 | -1.79 | 0.086 | 1.39  | 0.373 | -1.1  |
| 1439756_at   | 4933406J04Rik     | RIKEN cDNA 4933406J04 gene                                                       | -1.71 | 0.425 | -1.79 | 0.421 | -2.16 | 0.217 | 1.72  | 0.377 | -0.98 |
| 1446629_at   | C85938            | expressed sequence C85938                                                        | -1.29 | 0.63  | -2.52 | 0.181 | -2.27 | 0.068 | 1.5   | 0.629 | -1.14 |
| 1441000_at   | ---               | PREDICTED: Mus musculus similar to T-cell immunoglobulin and mucin domain        | -2.06 | 0.158 | -1.81 | 0.227 | -1.72 | 0.181 | 1.03  | 0.843 | -1.14 |
| 1442670_at   | 6430517E21Rik     | RIKEN cDNA 6430517E21 gene                                                       | -2.09 | 0.033 | -3.82 | 0.262 | -1.14 | 0.815 | 1.73  | 0.25  | -1.33 |
| 1420955_at   | Vsnl1             | visinin-like 1                                                                   | -1.73 | 0.472 | -1.47 | 0.05  | -2.74 | 0.012 | 1.55  | 0.195 | -1.1  |
| 1450352_at   | Mtnr1a            | melatonin receptor 1A                                                            | -2.13 | 0.45  | -1.98 | 0.237 | -1.53 | 0.343 | 1.46  | 0.527 | -1.05 |
| 1443548_at   | Ank2              | Ankyrin 2, brain                                                                 | -2.1  | 0.138 | -1.81 | 0.415 | -1.67 | 0.018 | 1.51  | 0.526 | -1.02 |
| 1420145_at   | ---               | Transcribed locus                                                                | -2.92 | 0.106 | -1.51 | 0.254 | -1.6  | 0.097 | 1.04  | 0.969 | -1.25 |
| 1430240_a_at | Clgn              | calmegin                                                                         | -3.03 | 0.013 | -2.11 | 0.314 | -1.21 | 0.201 | 1.68  | 0.535 | -1.17 |
| 1457103_at   | AU046084          | expressed sequence AU046084                                                      | -1.87 | 0.351 | -1.7  | 0.194 | -1.97 | 0.193 | 1.41  | 0.219 | -1.03 |
| 1460038_at   | Pou3f1            | POU domain, class 3, transcription factor 1                                      | -1.82 | 0.278 | -3.27 | 0.022 | -1.29 | 0.717 | 1.45  | 0.485 | -1.23 |

|              |                   |                                                                                  |       |       |       |       |       |       |       |       |       |
|--------------|-------------------|----------------------------------------------------------------------------------|-------|-------|-------|-------|-------|-------|-------|-------|-------|
| 1459183_at   | ---               | PREDICTED: Mus musculus similar to C05G5.5 (LOC230628), mRNA                     | -1.41 | 0.38  | -2.43 | 0.109 | -1.97 | 0.032 | 1.14  | 0.666 | -1.16 |
| 1443364_at   | ---               | Transcribed locus                                                                | -1.19 | 0.011 | -2.35 | 0.158 | -2.71 | 0.013 | 1.41  | 0.235 | -1.21 |
| 1459565_at   | Uty               | ubiquitously transcribed tetratricopeptide repeat gene, Y chromosome             | -3.21 | 0.008 | -1.76 | 0.245 | -1.33 | 0.065 | 1.65  | 0.415 | -1.16 |
| 1441777_at   | Emx1              | empty spiracles homolog 1 (Drosophila)                                           | -1.43 | 0.027 | -1.8  | 0.147 | -2.64 | 0.116 | 1.17  | 0.785 | -1.18 |
| 1445472_at   | 2210412E05Rik /// | RIKEN cDNA 2210412E05 gene /// similar to Carcinoembryonic antigen-related c     | -3.69 | 0.005 | -1.9  | 0.135 | -1.19 | 0.641 | 1.01  | 0.985 | -1.44 |
| 1441961_at   | Mtap9             | microtubule-associated protein 9                                                 | -1.92 | 0.252 | -1.95 | 0.096 | -1.65 | 0.205 | 1.66  | 0.067 | -0.97 |
| 1442515_at   | ---               | ---                                                                              | -2.54 | 0.234 | -1.67 | 0.438 | -1.55 | 0.368 | 1.29  | 0.501 | -1.12 |
| 1441421_at   | C530030P08Rik     | RIKEN cDNA C530030P08 gene                                                       | -1.97 | 0.421 | -1.72 | 0.331 | -1.83 | 0.078 | 1.74  | 0.495 | -0.94 |
| 1419958_at   | C330003B14Rik     | RIKEN cDNA C330003B14 gene                                                       | -3.01 | 0.295 | -1.84 | 0.494 | -1.31 | 0.4   | 1.04  | 0.915 | -1.28 |
| 1420432_at   | Tas1r1            | taste receptor, type 1, member 1                                                 | -1.47 | 0.241 | -3.26 | 0.284 | -1.52 | 0.355 | 1.39  | 0.384 | -1.22 |
| 1454508_at   | 4930485E13Rik     | RIKEN cDNA 4930485E13 gene                                                       | -2.74 | 0.102 | -1.35 | 0.646 | -1.87 | 0.246 | 1.15  | 0.774 | -1.2  |
| 1441628_at   | Diap3             | Diaphanous homolog 3 (Drosophila)                                                | -3.56 | 0.05  | -1.64 | 0.476 | -1.33 | 0.491 | 3.57  | 0.197 | -0.74 |
| 1454293_at   | Rbl1              | retinoblastoma-like 1 (p107)                                                     | -1.27 | 0.802 | -2.6  | 0.24  | -2.11 | 0.186 | 1.12  | 0.86  | -1.22 |
| 1433286_at   | 4833417J16Rik     | RIKEN cDNA 4833417J16 gene                                                       | -1.43 | 0.166 | -2.01 | 0.099 | -2.22 | 0.028 | 1.49  | 0.236 | -1.04 |
| 1418306_at   | Crybb1            | crystallin, beta B1                                                              | -1.96 | 0.531 | -1.64 | 0.457 | -1.9  | 0.155 | 1.34  | 0.665 | -1.04 |
| 1420468_at   | Asb17             | ankyrin repeat and SOCS box-containing protein 17                                | -1.65 | 0.176 | -2.38 | 0.022 | -1.61 | 0.204 | 5.42  | 0.158 | -0.05 |
| 1437700_at   | Schip1            | Schwannomin interacting protein 1                                                | -1.63 | 0.03  | -2.09 | 0.132 | -1.79 | 0.044 | 1.35  | 0.093 | -1.04 |
| 1435308_at   | Fut9              | fucosyltransferase 9                                                             | -1.28 | 0.025 | -4.33 | 0.01  | -1.57 | 0.291 | 1.21  | 0.494 | -1.49 |
| 1459620_at   | 9130004C02Rik     | RIKEN cDNA 9130004C02 gene                                                       | -2.59 | 0.457 | -1.76 | 0.286 | -1.43 | 0.397 | 1.86  | 0.144 | -0.98 |
| 1443211_at   | ---               | ---                                                                              | -1.87 | 0.634 | -4.69 | 0     | -1.1  | 0.377 | 1.84  | 0.401 | -1.45 |
| 1431297_a_at | 4933436C20Rik     | RIKEN cDNA 4933436C20 gene                                                       | -1.58 | 0.219 | -3.04 | 0.083 | -1.44 | 0.072 | 1.58  | 0.238 | -1.12 |
| 1444069_at   | Aut2              | Autism susceptibility candidate 2                                                | -1.19 | 0.709 | -4.63 | 0.191 | -1.68 | 0.464 | 1.28  | 0.493 | -1.55 |
| 1442713_at   | Osbpl10           | Oxysterol binding protein-like 10                                                | -2.28 | 0.27  | -1.6  | 0.043 | -1.69 | 0.246 | 1.01  | 0.972 | -1.14 |
| 1454520_at   | 5830415B17Rik     | RIKEN cDNA 5830415B17 gene                                                       | -2.49 | 0.141 | -2.38 | 0.06  | -1.2  | 0.469 | 1.11  | 0.764 | -1.24 |
| 1432441_at   | 4933413J09Rik     | RIKEN cDNA 4933413J09 gene                                                       | -2.13 | 0.092 | -1.62 | 0.114 | -1.76 | 0.104 | 1     | 0.999 | -1.13 |
| 1419930_at   | D15Ert55e         | DNA segment, Chr 15, ERATO Doi 55, expressed                                     | -1.92 | 0.523 | -2.49 | 0.04  | -1.36 | 0.581 | 1.96  | 0.22  | -0.95 |
| 1444470_x_at | Bmp5              | Bone morphogenetic protein 5                                                     | -4.18 | 0.07  | 1.1   | 0.838 | -3.1  | 0.003 | -3.45 | 0.091 | -2.41 |
| 1456838_at   | BC072620          | cDNA sequence BC072620                                                           | -1.88 | 0.319 | -1.57 | 0.434 | -2.03 | 0.432 | 2.62  | 0.057 | -0.72 |
| 1444649_at   | Prkce             | Protein kinase C, epsilon                                                        | -1.62 | 0.646 | -1.63 | 0.438 | -2.32 | 0.117 | 1.51  | 0.559 | -1.02 |
| 1460232_s_at | Hsd3b2 /// Hsd3b3 | hydroxy-delta-5-steroid dehydrogenase, 3 beta- and steroid delta-isomerase 2 /// | -1.19 | 0.127 | -2.2  | 0.004 | -2.71 | 0.064 | 1.29  | 0.71  | -1.2  |
| 1431379_a_at | Slc13a1           | solute carrier family 13 (sodium/sulphate symporters), member 1                  | -1.03 | 0.833 | -5.14 | 0.115 | -2.04 | 0.254 | 1.49  | 0.461 | -1.68 |
| 1449064_at   | Tdh               | L-threonine dehydrogenase                                                        | -1.65 | 0.372 | -2.49 | 0.08  | -1.53 | 0.469 | 1.42  | 0.419 | -1.06 |
| 1430709_at   | 4833405L11Rik     | RIKEN cDNA 4833405L11 gene                                                       | -2.42 | 0.002 | -2.68 | 0.188 | -1.14 | 0.822 | 2.86  | 0.223 | -0.84 |
| 1431695_at   | Rph3al            | rabphilin 3A-like (without C2 domains)                                           | -1.7  | 0.11  | -1.63 | 0.407 | -2.16 | 0.245 | 1.25  | 0.622 | -1.06 |
| 1433123_at   | 2900069G24Rik     | RIKEN cDNA 2900069G24 gene                                                       | -1.82 | 0.291 | -1.76 | 0.382 | -1.82 | 0.334 | 1.85  | 0.216 | -0.89 |
| 1432690_at   | 9030407C09Rik     | RIKEN cDNA 9030407C09 gene                                                       | -2.16 | 0.451 | -2.15 | 0.083 | -1.35 | 0.445 | 1.9   | 0.047 | -0.94 |
| 1429231_at   | ---               | ---                                                                              | -1.82 | 0.041 | -1.27 | 0.542 | -3.01 | 0.155 | 1.11  | 0.858 | -1.24 |
| 1450302_at   | 4930470P17Rik     | RIKEN cDNA 4930470P17 gene                                                       | -1.31 | 0.105 | -3.32 | 0.028 | -1.64 | 0.115 | 1.81  | 0.165 | -1.12 |
| 1446026_at   | Kif13a            | Kinesin family member 13A                                                        | -1.66 | 0.439 | -1.18 | 0.767 | -4.5  | 0.012 | 1.79  | 0.078 | -1.39 |
| 1460383_at   | Gnao1             | guanine nucleotide binding protein, alpha o                                      | -3.17 | 0.466 | -1.12 | 0.875 | -2.12 | 0.183 | 1.18  | 0.208 | -1.31 |
| 1426028_a_at | Cit               | citron                                                                           | -1.91 | 0.405 | -2.34 | 0.287 | -1.37 | 0.471 | 2.53  | 0.307 | -0.77 |
| 1426203_at   | Krtap16-4         | keratin associated protein 16-4                                                  | -4.42 | 0.12  | -1.23 | 0.699 | -1.56 | 0.3   | 1.84  | 0.202 | -1.34 |
| 1457221_at   | Igsf11            | Immunoglobulin superfamily, member 11                                            | -1.22 | 0.51  | -3.05 | 0.013 | -1.88 | 0.141 | 1.23  | 0.633 | -1.23 |
| 1449559_at   | Msx2              | homeo box, msh-like 2                                                            | -2.5  | 0.212 | -1.28 | 0.679 | -2    | 0.031 | 1.07  | 0.895 | -1.18 |
| 1444540_at   | ---               | ---                                                                              | -1.46 | 0.468 | -2.82 | 0.252 | -1.56 | 0.31  | 1.02  | 0.931 | -1.2  |
| 1432005_at   | Dnm2              | dynamitin 2                                                                      | -2.11 | 0.156 | -2.3  | 0     | -1.29 | 0.651 | 1.57  | 0.515 | -1.03 |
| 1441256_at   | Wdr45l            | Wdr45 like                                                                       | -2.32 | 0.031 | -1.52 | 0.534 | -1.68 | 0.383 | 1.49  | 0.45  | -1.01 |
| 1441775_at   | Wdr7              | WD repeat domain 7                                                               | -2.14 | 0.149 | -1.26 | 0.485 | -2.34 | 0.013 | 1.25  | 0.362 | -1.12 |
| 1443705_at   | D14Ert171e        | DNA segment, Chr 14, ERATO Doi 171, expressed                                    | -1.76 | 0.276 | -2.2  | 0.006 | -1.51 | 0.318 | 1.81  | 0.382 | -0.91 |
| 1458728_at   | ---               | ---                                                                              | -1.55 | 0.482 | -2.45 | 0.35  | -1.57 | 0.106 | 1.19  | 0.531 | -1.1  |
| 1420672_at   | Kcne1             | potassium voltage-gated channel, Isk-related subfamily, member 1                 | -2.79 | 0.065 | -2.06 | 0.387 | -1.18 | 0.415 | 1.01  | 0.986 | -1.26 |
| 1424561_at   | Ece2              | endothelin converting enzyme 2                                                   | -1.97 | 0.267 | -1.43 | 0.503 | -2.06 | 0.171 | 1.24  | 0.738 | -1.06 |
| 1442650_at   | ---               | Transcribed locus                                                                | -3.08 | 0.014 | -1.32 | 0.487 | -1.63 | 0.137 | 1.1   | 0.701 | -1.23 |

|              |                   |                                                                                   |       |       |       |       |       |       |       |       |       |
|--------------|-------------------|-----------------------------------------------------------------------------------|-------|-------|-------|-------|-------|-------|-------|-------|-------|
| 1458539_at   | R3hdm1            | R3H domain 1 (binds single-stranded nucleic acids)                                | -1.18 | 0.485 | -2.56 | 0.048 | -2.2  | 0.096 | 2.06  | 0.201 | -0.97 |
| 1439990_at   | ---               | 12 days embryo spinal ganglion cDNA, RIKEN full-length enriched library, clone: F | -1.45 | 0.348 | -1.87 | 0.356 | -2.12 | 0.313 | 1.01  | 0.98  | -1.11 |
| 1453088_at   | 6430628N08Rik     | RIKEN cDNA 6430628N08 gene                                                        | -1.9  | 0.066 | -1.59 | 0.202 | -1.84 | 0.182 | 1.06  | 0.86  | -1.07 |
| 1427669_a_at | Cit               | citron                                                                            | -2.11 | 0.113 | -2.47 | 0.208 | -1.22 | 0.504 | 3.26  | 0.077 | -0.64 |
| 1426139_a_at | Ccr11             | chemokine (C-C motif) receptor-like 1                                             | -1.27 | 0.723 | -1.69 | 0.111 | -3.1  | 0.237 | 1.13  | 0.804 | -1.23 |
| 1433240_at   | 9430013L17Rik     | RIKEN cDNA 9430013L17 gene                                                        | -3.79 | 0.063 | 1.05  | 0.92  | -2.62 | 0.017 | -3.01 | 0.06  | -2.09 |
| 1456035_at   | Nxf3              | nuclear RNA export factor 3                                                       | -1.43 | 0.608 | -2.25 | 0.256 | -1.81 | 0.107 | 1.31  | 0.7   | -1.05 |
| 1439265_at   | Xkr6              | X Kell blood group precursor related family member 6 homolog                      | -1.54 | 0.137 | -1.34 | 0.72  | -3.3  | 0.049 | 1.16  | 0.832 | -1.26 |
| 1427751_a_at | Krt36             | keratin 36                                                                        | -1.82 | 0.206 | -1.5  | 0.411 | -2.07 | 0.002 | 1.12  | 0.829 | -1.07 |
| 1424606_at   | Cplx3             | complexin 3                                                                       | -3.58 | 0.166 | -3.58 | 0.007 | 1.14  | 0.652 | -1.53 | 0.235 | -1.89 |
| 1446065_at   | Kcnd2             | Potassium voltage-gated channel, Shal-related family, member 2                    | -1.02 | 0.953 | -2.84 | 0.053 | -2.7  | 0.056 | 1.69  | 0.503 | -1.22 |
| 1446287_at   | 4931440B09Rik     | RIKEN cDNA 4931440B09 gene                                                        | -1.2  | 0.237 | -3.64 | 0.001 | -1.69 | 0.211 | 1.6   | 0.38  | -1.23 |
| 1436202_at   | ---               | ---                                                                               | -1.76 | 0.129 | -1.79 | 0.053 | -1.73 | 0.025 | 1.16  | 0.382 | -1.03 |
| 1436437_at   | Gm97              | gene model 97, (NCBI)                                                             | -4.09 | 0.047 | -1.85 | 0.099 | -1.09 | 0.754 | 1.38  | 0.52  | -1.41 |
| 1419576_at   | Hoxb13            | homeo box B13                                                                     | -1.57 | 0.486 | -1.73 | 0.271 | -2.04 | 0.071 | 1.01  | 0.989 | -1.08 |
| 1452570_at   | D0Kist5           | DNA segment, KIST 5                                                               | -2.18 | 0.225 | -1.82 | 0.227 | -1.43 | 0.384 | 1.2   | 0.791 | -1.06 |
| 1454100_at   | 4930480E11Rik     | RIKEN cDNA 4930480E11 gene                                                        | -1.73 | 0.411 | -1.63 | 0.4   | -1.93 | 0.136 | 1.59  | 0.304 | -0.93 |
| 1434074_x_at | Arf4              | ADP-ribosylation factor 4                                                         | -3.04 | 0.145 | -1.62 | 0.63  | -1.32 | 0.278 | 1.28  | 0.666 | -1.17 |
| 1456123_at   | AI481121          | expressed sequence AI481121                                                       | -1.35 | 0.232 | -1.52 | 0.491 | -3.26 | 0.004 | 2.01  | 0.1   | -1.03 |
| 1429020_at   | Pon2              | paraoxonase 2                                                                     | -2.41 | 0.259 | -1.36 | 0.404 | -1.8  | 0.005 | 1.56  | 0.362 | -1    |
| 1446528_at   | Scyl2             | SCY1-like 2 (S. cerevisiae)                                                       | -1.59 | 0.272 | -2.01 | 0.073 | -1.72 | 0.226 | 1.12  | 0.493 | -1.05 |
| 1422108_at   | Ppp1r3a           | protein phosphatase 1, regulatory (inhibitor) subunit 3A                          | -3.23 | 0.143 | -1.48 | 0.29  | -1.38 | 0.27  | 1.55  | 0.446 | -1.13 |
| 1419432_at   | Spam1             | sperm adhesion molecule 1                                                         | -2.29 | 0.059 | -1.38 | 0.366 | -1.82 | 0.252 | 1.1   | 0.836 | -1.1  |
| 1460512_a_at | 4930558O21Rik     | RIKEN cDNA 4930558O21 gene                                                        | -3.06 | 0.347 | 1.03  | 0.919 | -2.85 | 0.025 | -1.08 | 0.893 | -1.49 |
| 1453900_at   | 1700018A14Rik     | RIKEN cDNA 1700018A14 gene                                                        | -2.41 | 0.098 | -1.8  | 0.458 | -1.35 | 0.668 | 2.67  | 0.046 | -0.72 |
| 1430493_at   | 2310061G22Rik     | RIKEN cDNA 2310061G22 gene                                                        | -2.27 | 0.146 | -1.2  | 0.539 | -2.29 | 0.035 | 1.16  | 0.524 | -1.15 |
| 1430420_at   | Alg9              | asparagine-linked glycosylation 9 homolog (yeast, alpha 1,2 mannosyltransferase   | -2.73 | 0.06  | -2.19 | 0.293 | -1.12 | 0.807 | 1.77  | 0.302 | -1.07 |
| 1440618_at   | 9130416B15        | hypothetical protein 9130416B15                                                   | -1.57 | 0.541 | -1.33 | 0.467 | -3.13 | 0.07  | 1.11  | 0.832 | -1.23 |
| 1443317_at   | D6Ert47e          | DNA segment, Chr 6, ERATO Doi 47, expressed                                       | -4.07 | 0.259 | -1.12 | 0.885 | -1.74 | 0.121 | 1.47  | 0.182 | -1.37 |
| 1432890_at   | 2610011E03Rik     | RIKEN cDNA 2610011E03 gene                                                        | -2.1  | 0.365 | -1.29 | 0.586 | -2.17 | 0.28  | 1.02  | 0.973 | -1.13 |
| 1439003_s_at | 1700008F21Rik /// | RIKEN cDNA 1700008F21 gene /// similar to coiled-coil domain containing 7         | -1.47 | 0.579 | -1.81 | 0.376 | -2.09 | 0.372 | 1.33  | 0.53  | -1.01 |
| 1427547_a_at | Slc26a3           | solute carrier family 26, member 3                                                | -1.6  | 0.15  | -1.78 | 0.348 | -1.9  | 0.064 | 1.71  | 0.287 | -0.89 |
| 1456391_at   | Tdrd5             | tudor domain containing 5                                                         | -1.07 | 0.836 | -3.55 | 0.091 | -1.97 | 0.129 | 1.12  | 0.767 | -1.37 |
| 1436612_at   | 2410004I01Rik     | RIKEN cDNA 2410004I01 gene                                                        | -4.42 | 0.011 | -1.3  | 0.762 | -1.37 | 0.233 | 1.25  | 0.763 | -1.46 |
| 1442545_at   | ---               | ---                                                                               | -3.05 | 0.064 | -2.32 | 0.307 | -1.04 | 0.943 | 1.38  | 0.373 | -1.26 |
| 1458498_at   | ---               | ---                                                                               | -1.52 | 0.519 | -1.75 | 0.409 | -2.02 | 0.169 | 1.06  | 0.896 | -1.06 |
| 1442552_at   | Thsd4             | thrombospondin, type I, domain containing 4                                       | -2.63 | 0.359 | -1.25 | 0.368 | -1.84 | 0.077 | 2.8   | 0.282 | -0.73 |
| 1431451_at   | Glt6d1            | glycosyltransferase 6 domain containing 1                                         | -3.42 | 0.04  | -2.15 | 0.123 | -1.03 | 0.934 | 1.05  | 0.895 | -1.39 |
| 1438086_at   | Npy6r             | neuropeptide Y receptor Y6                                                        | -1.82 | 0.187 | -3.63 | 0.071 | -1.11 | 0.889 | 2.94  | 0.021 | -0.9  |
| 1447768_at   | Got2 /// LOC64084 | glutamate oxaloacetate transaminase 2, mitochondrial /// similar to Aspartate ami | -1.67 | 0.058 | -2.12 | 0.074 | -1.53 | 0.059 | 1.39  | 0.58  | -0.98 |
| 1440945_at   | ---               | ---                                                                               | -1.26 | 0.694 | -2.72 | 0.023 | -1.74 | 0.15  | 1.41  | 0.299 | -1.08 |
| 1459421_at   | Hkdc1             | hexokinase domain containing 1                                                    | -1.68 | 0.539 | -1.92 | 0.298 | -1.62 | 0.263 | 1.63  | 0.437 | -0.9  |
| 1450636_s_at | Akp5              | alkaline phosphatase 5                                                            | -2.07 | 0.146 | -1.81 | 0.166 | -1.43 | 0.421 | 1.65  | 0.221 | -0.92 |
| 1443812_x_at | Prkg1             | Protein kinase, cGMP-dependent, type I                                            | -1.91 | 0.193 | -1.67 | 0.157 | -1.63 | 0.15  | 1.5   | 0.324 | -0.93 |
| 1442729_at   | D12Ert4553e       | DNA segment, Chr 12, ERATO Doi 553, expressed                                     | -5.96 | 0.003 | -1.76 | 0.468 | 1     | 0.996 | -1.2  | 0.364 | -1.98 |
| 1457853_at   | BC021785          | CDNA sequence BC021785                                                            | -1.25 | 0.123 | -2.27 | 0.383 | -2.02 | 0.291 | 1.23  | 0.317 | -1.08 |
| 1459577_at   | ---               | ---                                                                               | -2.07 | 0.011 | -1.67 | 0.288 | -1.52 | 0.329 | 1.16  | 0.809 | -1.03 |
| 1450188_s_at | Lipg              | lipase, endothelial                                                               | -1.29 | 0.704 | -2.07 | 0.198 | -2.07 | 0.005 | 5     | 0.276 | -0.11 |
| 1446753_at   | ---               | ---                                                                               | -2.28 | 0.169 | -1.81 | 0.167 | -1.34 | 0.686 | 1.09  | 0.891 | -1.08 |
| 1440453_at   | 1700012C15Rik     | RIKEN cDNA 1700012C15 gene                                                        | -1.83 | 0.453 | -2.52 | 0.348 | -1.25 | 0.064 | 1.19  | 0.401 | -1.1  |
| 1432675_at   | Mdn1              | midasin homolog (yeast)                                                           | -1.92 | 0.048 | -1.56 | 0.556 | -1.72 | 0.213 | 1.54  | 0.142 | -0.92 |
| 1450162_at   | Dpf3              | D4, zinc and double PHD fingers, family 3                                         | -3.23 | 0.082 | -1.26 | 0.596 | -1.56 | 0.282 | 2.39  | 0.126 | -0.92 |
| 1438997_at   | Ern1              | Endoplasmic reticulum (ER) to nucleus signalling 1                                | -1.88 | 0.179 | -1.99 | 0.189 | -1.41 | 0.485 | 1.47  | 0.121 | -0.95 |

|              |                   |                                                                                 |       |       |       |       |       |       |       |       |       |
|--------------|-------------------|---------------------------------------------------------------------------------|-------|-------|-------|-------|-------|-------|-------|-------|-------|
| 1432354_at   | 1700003H04Rik     | RIKEN cDNA 1700003H04 gene                                                      | -1.52 | 0.346 | -2.27 | 0.203 | -1.55 | 0.259 | 1.52  | 0.464 | -0.96 |
| 1453383_at   | 1700022F17Rik     | RIKEN cDNA 1700022F17 gene                                                      | -1.19 | 0.677 | -2.91 | 0.097 | -1.77 | 0.501 | 1.35  | 0.593 | -1.13 |
| 1445287_at   | ---               | Adult male spinal cord cDNA, RIKEN full-length enriched library, clone:A330010P | -1.14 | 0.882 | -1.98 | 0.228 | -2.71 | 0.149 | 1.59  | 0.439 | -1.06 |
| 1432148_at   | 4930533K18Rik     | RIKEN cDNA 4930533K18 gene                                                      | -2.23 | 0.364 | -2.09 | 0.36  | -1.22 | 0.609 | 1.27  | 0.09  | -1.07 |
| 1439139_at   | D2Ert640e         | DNA segment, Chr 2, ERATO Doi 640, expressed                                    | -1.33 | 0.37  | -1.58 | 0.202 | -2.76 | 0.007 | 1.72  | 0.034 | -0.99 |
| 1444423_at   | ---               | Transcribed locus                                                               | -2.77 | 0.472 | -1.67 | 0.229 | -1.27 | 0.602 | 1.88  | 0.338 | -0.96 |
| 1453856_at   | Btbd4             | BTB (POZ) domain containing 4                                                   | -2.07 | 0.369 | -3.36 | 0.004 | -1.03 | 0.959 | 2.75  | 0.02  | -0.93 |
| 1442794_at   | Col8a1            | procollagen, type VIII, alpha 1                                                 | -1.35 | 0.569 | -1.89 | 0.311 | -2.09 | 0.057 | 1.16  | 0.839 | -1.04 |
| 1458954_at   | ---               | ---                                                                             | -2.38 | 0.059 | -2.31 | 0.266 | -1.12 | 0.802 | 1.02  | 0.977 | -1.2  |
| 1437753_at   | AW742931          | Expressed sequence AW742931                                                     | -1.72 | 0.395 | -1.6  | 0.041 | -1.85 | 0.121 | 1.21  | 0.647 | -0.99 |
| 1421483_at   | Lhx4              | LIM homeobox protein 4                                                          | -2.48 | 0.348 | -1.29 | 0.426 | -1.74 | 0.284 | 1.05  | 0.947 | -1.12 |
| 1447129_at   | ---               | ---                                                                             | -1.25 | 0.425 | -2.13 | 0.261 | -2.06 | 0.143 | 1.02  | 0.936 | -1.11 |
| 1438613_at   | Kcna4             | potassium voltage-gated channel, shaker-related subfamily, member 4             | -1.49 | 0.541 | -1.62 | 0.312 | -2.16 | 0.122 | 1.41  | 0.624 | -0.96 |
| 1438341_at   | Tgm4              | transglutaminase 4 (prostate)                                                   | -2.67 | 0.083 | -1.33 | 0.644 | -1.6  | 0.423 | 1.04  | 0.946 | -1.14 |
| 1441189_at   | ---               | Transcribed locus                                                               | -1.39 | 0.679 | -1.83 | 0.181 | -2.05 | 0.114 | 1.29  | 0.751 | -0.99 |
| 1426704_at   | Gak               | cyclin G associated kinase                                                      | -2.17 | 0.173 | -1.3  | 0.454 | -1.91 | 0.012 | 1.32  | 0.736 | -1.01 |
| 1431122_at   | Armc9             | armadillo repeat containing 9                                                   | -1.74 | 0.376 | -2.49 | 0.173 | -1.28 | 0.435 | 1.84  | 0.3   | -0.92 |
| 1456508_at   | A030001H23Rik     | RIKEN cDNA A030001H23 gene                                                      | -1.21 | 0.594 | -2.22 | 0.1   | -2.08 | 0.379 | 3.93  | 0.315 | -0.4  |
| 1444142_at   | LOC432591 /// LOC | hypothetical LOC432591 /// hypothetical protein LOC639155                       | -1.26 | 0.543 | -1.81 | 0.24  | -2.45 | 0.082 | 1.6   | 0.398 | -0.98 |
| 1433254_at   | 5033423K11Rik     | RIKEN cDNA 5033423K11 gene                                                      | -2.24 | 0.396 | -1.05 | 0.946 | -2.76 | 0.181 | 2.49  | 0.045 | -0.89 |
| 1446734_at   | C77438            | expressed sequence C77438                                                       | -1.97 | 0.071 | -1.4  | 0.494 | -1.86 | 0.151 | 2.11  | 0.102 | -0.78 |
| 1432529_at   | Boll              | bol, boule-like (Drosophila)                                                    | -1.95 | 0.029 | -1.29 | 0.603 | -2.14 | 0.016 | 1.35  | 0.535 | -1.01 |
| 1442211_at   | C78893            | expressed sequence C78893                                                       | -1.92 | 0.166 | -2.49 | 0.169 | -1.19 | 0.674 | 1.1   | 0.809 | -1.13 |
| 1418093_a_at | Egf               | epidermal growth factor                                                         | -1.36 | 0.12  | -4.43 | 0.077 | -1.25 | 0.263 | 1.16  | 0.564 | -1.47 |
| 1430203_at   | Usp16             | ubiquitin specific peptidase 16                                                 | -2.09 | 0.054 | -2.71 | 0.03  | -1.1  | 0.757 | 1.12  | 0.703 | -1.19 |
| 1446170_at   | Abcc12            | ATP-binding cassette, sub-family C (CFTR/MRP), member 12                        | -1.35 | 0.168 | -2.26 | 0.377 | -1.72 | 0.264 | 1.05  | 0.956 | -1.07 |
| 1456570_at   | ---               | ---                                                                             | -1.92 | 0.247 | -1.82 | 0.265 | -1.44 | 0.502 | 1.32  | 0.734 | -0.97 |
| 1437575_at   | Mcmcdc1           | minichromosome maintenance deficient domain containing 1                        | -1.35 | 0.695 | -1.42 | 0.426 | -3.09 | 0.027 | 1.14  | 0.803 | -1.18 |
| 1442285_at   | Syne2             | synaptic nuclear envelope 2                                                     | 1.01  | 0.917 | -1.79 | 0.095 | -5.07 | 0.085 | -1.17 | 0.622 | -1.76 |
| 1421443_at   | Gpr110            | G protein-coupled receptor 110                                                  | -1.03 | 0.965 | -2.99 | 0.156 | -2.18 | 0.112 | 1.81  | 0.076 | -1.1  |
| 1430174_at   | A930010G16Rik     | RIKEN cDNA A930010G16 gene                                                      | -1.68 | 0.37  | -1.68 | 0.616 | -1.74 | 0.049 | 2.86  | 0.094 | -0.56 |
| 1428053_at   | Gprc6a            | G protein-coupled receptor, family C, group 6, member A                         | -1.25 | 0.666 | -1.41 | 0.575 | -3.88 | 0.014 | 1.53  | 0.182 | -1.25 |
| 1447875_x_at | AA407452          | EST AA407452                                                                    | -1.32 | 0.698 | -1.42 | 0.507 | -3.29 | 0.011 | 1.42  | 0.509 | -1.15 |
| 1445409_at   | Lrba              | LPS-responsive beige-like anchor                                                | -1.42 | 0.277 | -3.91 | 0.03  | -1.24 | 0.709 | 1.4   | 0.653 | -1.29 |
| 1428363_at   | Elf4g2            | eukaryotic translation initiation factor 4, gamma 2                             | -1.27 | 0.632 | -3.94 | 0.168 | -1.38 | 0.489 | 1.2   | 0.591 | -1.34 |
| 1430904_at   | Arfgap3           | ADP-ribosylation factor GTPase activating protein 3                             | -1.34 | 0.137 | -2.09 | 0.291 | -1.84 | 0.016 | 1.34  | 0.108 | -0.98 |
| 1445908_at   | Elf2b5            | Eukaryotic translation initiation factor 2B, subunit 5 epsilon                  | -1.18 | 0.219 | -2.44 | 0.194 | -1.96 | 0.038 | 1.3   | 0.588 | -1.07 |
| 1445202_at   | ---               | 0 day neonate cerebellum cDNA, RIKEN full-length enriched library, clone:C2300  | -3.04 | 0.266 | -1.7  | 0.267 | -1.17 | 0.83  | 2.03  | 0.023 | -0.97 |
| 1453705_at   | B230110C06Rik     | RIKEN cDNA B230110C06 gene                                                      | -2.15 | 0.457 | -1.35 | 0.57  | -1.78 | 0.004 | 1.12  | 0.706 | -1.04 |
| 1449739_at   | Ptdss1            | Phosphatidylserine synthase 1                                                   | 1.23  | 0.638 | -2.71 | 0.058 | -5.7  | 0.012 | -2.11 | 0.098 | -2.32 |
| 1418697_at   | Inmt              | indoethylamine N-methyltransferase                                              | -2.02 | 0.225 | -1.95 | 0.161 | -1.31 | 0.003 | 2.6   | 0.314 | -0.67 |
| 1458942_at   | C230037E05Rik     | RIKEN cDNA C230037E05 gene                                                      | -1.47 | 0.168 | -1.85 | 0.318 | -1.81 | 0.057 | 1.43  | 0.462 | -0.93 |
| 1445887_at   | ---               | ---                                                                             | -1.7  | 0.08  | -1.28 | 0.587 | -2.49 | 0.008 | 1.65  | 0.114 | -0.95 |
| 1421428_at   | Slc5a7            | solute carrier family 5 (choline transporter), member 7                         | -3.19 | 0.302 | -1.41 | 0.394 | -1.34 | 0.105 | 1.27  | 0.622 | -1.17 |
| 1453697_at   | 6530402F18Rik     | RIKEN cDNA 6530402F18 gene                                                      | -3.28 | 0.059 | -2.18 | 0.014 | 1.01  | 0.981 | -1.74 | 0.177 | -1.55 |
| 1419895_at   | AA536748          | expressed sequence AA536748                                                     | -1.55 | 0.445 | -2.89 | 0.11  | -1.27 | 0.499 | 1.23  | 0.671 | -1.12 |
| 1436010_at   | BC036313          | cDNA sequence BC036313                                                          | -1.77 | 0.17  | -1.89 | 0.085 | -1.47 | 0.144 | 1.14  | 0.663 | -1    |
| 1445352_at   | ---               | Transcribed locus                                                               | -1.35 | 0.18  | -6.02 | 0.024 | -1.15 | 0.579 | 2.56  | 0.047 | -1.49 |
| 1420169_at   | AA517841          | expressed sequence AA517841                                                     | -2.51 | 0.352 | -1.34 | 0.214 | -1.58 | 0.276 | 1.18  | 0.27  | -1.06 |
| 1442220_at   | ---               | ---                                                                             | -2.46 | 0.153 | -1.16 | 0.619 | -1.96 | 0.306 | 1.69  | 0.257 | -0.97 |
| 1419919_at   | 4833422M21Rik     | RIKEN cDNA 4833422M21 gene                                                      | -2.66 | 0.091 | -1.9  | 0.141 | -1.14 | 0.789 | 1.82  | 0.155 | -0.97 |
| 1440621_at   | Kitl              | Kit ligand                                                                      | -1.02 | 0.851 | -2.2  | 0.127 | -2.94 | 0.002 | 1.16  | 0.522 | -1.25 |
| 1459470_at   | Runx1             | Runt related transcription factor 1                                             | -1.74 | 0.076 | -1.78 | 0.087 | -1.56 | 0.137 | 1.16  | 0.252 | -0.98 |

|              |               |                                                                              |       |       |       |       |       |       |       |       |       |
|--------------|---------------|------------------------------------------------------------------------------|-------|-------|-------|-------|-------|-------|-------|-------|-------|
| 1457651_x_at | Rem2          | rad and gem related GTP binding protein 2                                    | -2.04 | 0.532 | -1.23 | 0.562 | -2.11 | 0.227 | 1.33  | 0.547 | -1.01 |
| 1423562_at   | Prrt1         | proline-rich transmembrane protein 1                                         | -3.27 | 0.097 | -1.49 | 0.015 | -1.25 | 0.604 | 1.19  | 0.757 | -1.21 |
| 1439877_at   | Ext1          | Exostos (multiple) 1                                                         | -1.65 | 0.188 | -1.46 | 0.082 | -2.05 | 0.001 | 1.24  | 0.398 | -0.98 |
| 1441425_at   | ---           | Transcribed locus                                                            | -1.34 | 0.219 | -2.05 | 0.106 | -1.84 | 0.141 | 1.13  | 0.247 | -1.02 |
| 1441283_at   | 5730405I09Rik | RIKEN cDNA 5730405I09 gene                                                   | 1.04  | 0.723 | -4.38 | 0.089 | -1.95 | 0.108 | -2.16 | 0.129 | -1.86 |
| 1421979_at   | Phex          | phosphate regulating gene with homologies to endopeptidases on the X chromos | -1.35 | 0.711 | -1.23 | 0.748 | -4.44 | 0.002 | 1     | 0.996 | -1.5  |
| 1417429_at   | Fmo1          | flavin containing monooxygenase 1                                            | -1.58 | 0.124 | -1.6  | 0.01  | -1.92 | 0.006 | 1.38  | 0.257 | -0.93 |
| 1445328_at   | Col4a4        | procollagen, type IV, alpha 4                                                | -1.23 | 0.419 | -2.18 | 0.452 | -1.96 | 0.039 | 1.02  | 0.961 | -1.09 |
| 1447819_x_at | Col8a1        | procollagen, type VIII, alpha 1                                              | -1.52 | 0.135 | -4.58 | 0.042 | -1.11 | 0.625 | 1.86  | 0.208 | -1.34 |
| 1449792_at   | ---           | ---                                                                          | -1.12 | 0.858 | -2.27 | 0.282 | -2.23 | 0.208 | 1.2   | 0.19  | -1.11 |
| 1425758_a_at | Impg1         | interphotoreceptor matrix proteoglycan 1                                     | -1.42 | 0.184 | -1.44 | 0.014 | -2.58 | 0.113 | 1.14  | 0.403 | -1.08 |
| 1431918_at   | 1700036A12Rik | RIKEN cDNA 1700036A12 gene                                                   | -2.08 | 0.137 | -1.11 | 0.856 | -2.47 | 0.055 | 1.48  | 0.395 | -1.05 |
| 1443075_at   | Ptprd         | Protein tyrosine phosphatase, receptor type, D                               | -1.28 | 0.319 | -2.27 | 0.105 | -1.78 | 0.223 | 1.2   | 0.808 | -1.03 |
| 1455034_at   | Nr4a2         | Nuclear receptor subfamily 4, group A, member 2                              | -1.53 | 0.055 | -2.2  | 0.103 | -1.47 | 0.367 | 2.35  | 0.053 | -0.71 |
| 1447684_at   | Lzic          | Leucine zipper and CTNNBIP1 domain containing                                | -1.67 | 0.403 | -1.62 | 0.379 | -1.74 | 0.052 | 1.49  | 0.301 | -0.89 |
| 1446264_at   | ---           | ---                                                                          | -1.44 | 0.256 | -2.47 | 0.01  | -1.45 | 0.095 | 1.55  | 0.32  | -0.95 |
| 1432071_at   | 6330437I11Rik | RIKEN cDNA 6330437I11 gene                                                   | -1.15 | 0.452 | -2.83 | 0.259 | -1.77 | 0.226 | 1.44  | 0.319 | -1.08 |
| 1449654_s_at | C77545        | expressed sequence C77545                                                    | -1.61 | 0.003 | -1.82 | 0.412 | -1.61 | 0.215 | 1.08  | 0.859 | -0.99 |
| 1459468_at   | C79743        | expressed sequence C79743                                                    | -2.08 | 0.189 | -1.88 | 0.101 | -1.28 | 0.582 | 1.26  | 0.434 | -0.99 |
| 1432956_at   | 4930444K16Rik | RIKEN cDNA 4930444K16 gene                                                   | -1.53 | 0.636 | -2.66 | 0.306 | -1.31 | 0.178 | 1.1   | 0.923 | -1.1  |
| 1453465_x_at | Ppp1r14c      | protein phosphatase 1, regulatory (inhibitor) subunit 14c                    | -1.44 | 0.153 | -2.46 | 0.004 | -1.44 | 0.202 | 1.26  | 0.572 | -1.02 |
| 1446929_at   | Bach2         | BTB and CNC homology 2                                                       | 1.05  | 0.942 | -3.44 | 0.019 | -2.21 | 0.012 | -3.06 | 0.05  | -1.91 |
| 1416193_at   | Car1          | carbonic anhydrase 1                                                         | -2.32 | 0.173 | -1.53 | 0.394 | -1.41 | 0.602 | 4.83  | 0.089 | -0.11 |
| 1444901_at   | ---           | ---                                                                          | 1.01  | 0.991 | -2.26 | 0.199 | -2.94 | 0.122 | -1.79 | 0.258 | -1.49 |
| 1432412_at   | 9530004P13Rik | RIKEN cDNA 9530004P13 gene                                                   | -2.55 | 0.089 | -1.58 | 0.363 | -1.3  | 0.359 | 1.58  | 0.215 | -0.96 |
| 1443239_at   | Mtap2         | Microtubule-associated protein 2                                             | -2.14 | 0.317 | -2.75 | 0.141 | -1.04 | 0.934 | 1.38  | 0.494 | -1.14 |
| 1453644_at   | Obp1a         | odorant binding protein 1a                                                   | -1.71 | 0.506 | -2.83 | 0.135 | -1.17 | 0.292 | 1.96  | 0.083 | -0.94 |
| 1453624_at   | C430046K18Rik | RIKEN cDNA C430046K18 gene                                                   | -1.48 | 0.169 | -1.39 | 0.544 | -2.5  | 0.051 | 1.68  | 0.302 | -0.92 |
| 1435849_at   | 6330417G02Rik | RIKEN cDNA 6330417G02 gene                                                   | -1.56 | 0.513 | -1.3  | 0.696 | -2.59 | 0.252 | 1.12  | 0.829 | -1.08 |
| 1444975_at   | Chchd6        | Coiled-coil-helix-coiled-coil-helix domain containing 6                      | -1.77 | 0.18  | -1.77 | 0.321 | -1.5  | 0.164 | 1.16  | 0.626 | -0.97 |
| 1430941_at   | Bbs7          | Bardet-Biedl syndrome 7                                                      | -1.93 | 0.387 | -1.19 | 0.747 | -2.3  | 0.195 | 1.3   | 0.742 | -1.03 |
| 1446469_at   | A030008J09    | hypothetical protein A030008J09                                              | -2.56 | 0.028 | -1.2  | 0.754 | -1.74 | 0.358 | 1.49  | 0.574 | -1    |
| 1430717_at   | 4930403C10Rik | RIKEN cDNA 4930403C10 gene                                                   | -2.19 | 0.103 | -1.9  | 0.19  | -1.23 | 0.312 | 1.34  | 0.707 | -0.99 |
| 1435310_at   | Fbxo7         | F-box only protein 7                                                         | -1.78 | 0.312 | -1.56 | 0.286 | -1.68 | 0.067 | 1.14  | 0.781 | -0.97 |
| 1453334_at   | B230216N24Rik | RIKEN cDNA B230216N24 gene                                                   | -1.71 | 0.186 | -1.46 | 0.439 | -1.88 | 0.001 | 1.36  | 0.601 | -0.93 |
| 1440541_at   | 2810442I21Rik | RIKEN cDNA 2810442I21 gene                                                   | -1.27 | 0.524 | -2.12 | 0.24  | -1.84 | 0.264 | 1.6   | 0.322 | -0.91 |
| 1420536_at   | Crybb2        | crystallin, beta B2                                                          | -1.92 | 0.294 | -1.86 | 0.152 | -1.35 | 0.389 | 1.36  | 0.462 | -0.94 |
| 1453573_at   | Hist1h3d      | histone1, H3d                                                                | -1.96 | 0.003 | -1.84 | 0.123 | -1.34 | 0.173 | 1.57  | 0.223 | -0.89 |
| 1432393_a_at | 5730409G07Rik | RIKEN cDNA 5730409G07 gene                                                   | -1.2  | 0.608 | -2.69 | 0.018 | -1.68 | 0.014 | 1.07  | 0.9   | -1.12 |
| 1432408_a_at | D0Kist2       | DNA segment, KIST 2                                                          | -2.25 | 0.155 | -1.5  | 0.192 | -1.45 | 0.555 | 1.33  | 0.452 | -0.97 |
| 1439996_at   | Tatdn1        | TatD DNase domain containing 1                                               | -2    | 0.013 | -1.52 | 0.194 | -1.54 | 0.181 | 1.4   | 0.004 | -0.92 |
| 1438210_at   | Gpr149        | G protein-coupled receptor 149                                               | -3.9  | 0.007 | -1.88 | 0.063 | 1.02  | 0.979 | -1.17 | 0.336 | -1.49 |
| 1425952_a_at | Gcg           | glucagon                                                                     | -3.72 | 0.348 | -1.91 | 0.321 | 1.01  | 0.983 | -2.78 | 0.155 | -1.85 |
| 1425056_s_at | Saps2         | SAPS domain family, member 2                                                 | -1.66 | 0.021 | -1.73 | 0.156 | -1.59 | 0.145 | 1.72  | 0.281 | -0.82 |
| 1432928_at   | 4921507K24Rik | RIKEN cDNA 4921507K24 gene                                                   | -3.35 | 0.043 | -1.5  | 0.467 | -1.18 | 0.684 | 1.32  | 0.127 | -1.18 |
| 1443443_at   | ---           | ---                                                                          | -1.51 | 0.281 | -3.16 | 0.033 | -1.2  | 0.139 | 1.37  | 0.61  | -1.13 |
| 1449458_at   | Foxi1         | forkhead box I1                                                              | -1.63 | 0.182 | -2.16 | 0.375 | -1.37 | 0.454 | 2.14  | 0.004 | -0.75 |
| 1431300_at   | Sgip1         | SH3-domain GRB2-like (endophilin) interacting protein 1                      | -1.36 | 0.215 | -1.67 | 0.21  | -2.11 | 0.018 | 1.91  | 0.158 | -0.81 |
| 1446884_at   | AU022554      | expressed sequence AU022554                                                  | -2.57 | 0.067 | -1.16 | 0.68  | -1.8  | 0.15  | 1.12  | 0.836 | -1.1  |
| 1431489_at   | 4933432K03Rik | RIKEN cDNA 4933432K03 gene                                                   | -2.71 | 0.094 | -1.79 | 0.438 | -1.13 | 0.815 | 2.22  | 0.14  | -0.85 |
| 1419995_at   | D10Ert641e    | DNA segment, Chr 10, ERATO Doi 641, expressed                                | -1.4  | 0.283 | -2.04 | 0.411 | -1.64 | 0.11  | 1.16  | 0.773 | -0.98 |
| 1433119_at   | 4930456G14Rik | RIKEN cDNA 4930456G14 gene                                                   | -3.13 | 0.013 | -1.38 | 0.462 | -1.3  | 0.562 | 1.85  | 0.114 | -0.99 |
| 1420689_at   | 4933415F23Rik | RIKEN cDNA 4933415F23 gene                                                   | -1.96 | 0.43  | -1.53 | 0.581 | -1.54 | 0.335 | 1.09  | 0.887 | -0.99 |

|              |               |                                                                                   |       |       |       |       |       |       |       |       |       |
|--------------|---------------|-----------------------------------------------------------------------------------|-------|-------|-------|-------|-------|-------|-------|-------|-------|
| 1426150_at   | Gipc3         | GIPC PDZ domain containing family, member 3                                       | -1.43 | 0.564 | -1.66 | 0.078 | -1.95 | 0.173 | 1.37  | 0.373 | -0.92 |
| 1420252_at   | ---           | ---                                                                               | -1.56 | 0.442 | -1.64 | 0.208 | -1.78 | 0.136 | 1.65  | 0.12  | -0.83 |
| 1431877_a_at | Grhl2         | grainyhead-like 2 (Drosophila)                                                    | -1.79 | 0.375 | -1.35 | 0.275 | -1.93 | 0     | 2.3   | 0.286 | -0.69 |
| 1458356_at   | ---           | ---                                                                               | -1.24 | 0.033 | -4.28 | 0.095 | -1.29 | 0.596 | 1.03  | 0.676 | -1.44 |
| 1425013_at   | Slc25a2       | solute carrier family 25 (mitochondrial carrier, ornithine transporter) member 2  | -1.67 | 0.216 | -2.06 | 0.024 | -1.36 | 0.29  | 1.09  | 0.798 | -1    |
| 1444778_at   | 3-Sep         | septin 3                                                                          | -2.06 | 0.238 | -1.02 | 0.96  | -2.83 | 0.016 | 1.02  | 0.966 | -1.22 |
| 1450584_at   | Hoxd11        | homeo box D11                                                                     | -1.83 | 0.01  | -2.05 | 0.085 | -1.28 | 0.639 | 1.03  | 0.972 | -1.03 |
| 1455907_x_at | Phox2b        | paired-like homeobox 2b                                                           | -2.34 | 0.249 | -1.21 | 0.51  | -1.76 | 0.265 | 1.45  | 0.492 | -0.97 |
| 1440425_at   | ---           | ---                                                                               | -2.72 | 0.027 | -1.62 | 0.031 | -1.2  | 0.741 | 1.84  | 0.443 | -0.92 |
| 1432808_at   | 5830426K05Rik | RIKEN cDNA 5830426K05 gene                                                        | -1.43 | 0.634 | -2.39 | 0.18  | -1.42 | 0.464 | 4.19  | 0.357 | -0.26 |
| 1430666_at   | LOC665270     | similar to phospholipase B                                                        | -2.01 | 0.351 | -1.46 | 0.494 | -1.57 | 0.204 | 1.32  | 0.199 | -0.93 |
| 1440009_at   | Olf78         | olfactory receptor 78                                                             | -2.96 | 0.342 | 1.13  | 0.814 | -2.85 | 0.297 | -1.65 | 0.566 | -1.58 |
| 1433175_at   | ---           | ---                                                                               | -1.84 | 0.184 | -1.16 | 0.823 | -2.39 | 0.236 | 1.92  | 0.179 | -0.87 |
| 1442904_at   | LOC622118     | similar to RNA (guanine-9-) methyltransferase domain containing 2                 | -1.82 | 0.496 | -2.37 | 0.406 | -1.17 | 0.339 | 1.43  | 0.526 | -0.98 |
| 1444639_at   | Nphp4         | Nephronophthisis 4 (juvenile) homolog (human)                                     | -4.13 | 0.012 | -2.34 | 0.406 | 1.15  | 0.776 | -1.52 | 0.529 | -1.71 |
| 1418917_at   | Hebp2         | heme binding protein 2                                                            | -1.28 | 0.659 | -2.47 | 0.23  | -1.57 | 0.152 | 1.15  | 0.692 | -1.04 |
| 1421218_at   | Bche          | butyrylcholinesterase                                                             | -1.51 | 0.382 | -1.96 | 0.188 | -1.53 | 0.344 | 1.16  | 0.681 | -0.96 |
| 1449605_at   | ---           | Transcribed locus                                                                 | -1.93 | 0.248 | -1.45 | 0.224 | -1.62 | 0.51  | 1.03  | 0.86  | -0.99 |
| 1456364_at   | C230057M02Rik | RIKEN cDNA C230057M02 gene                                                        | -2.75 | 0.118 | -2.56 | 0.117 | 1.07  | 0.87  | -2.51 | 0.067 | -1.69 |
| 1446742_at   | Nfia          | Nuclear factor I/A                                                                | -2.24 | 0.539 | -2.42 | 0.034 | -1.04 | 0.907 | 1.62  | 0.423 | -1.02 |
| 1456417_at   | Zic4          | zinc finger protein of the cerebellum 4                                           | -1.73 | 0.173 | -1.73 | 0.475 | -1.5  | 0.508 | 4.62  | 0.011 | -0.08 |
| 1424437_s_at | Abcg4         | ATP-binding cassette, sub-family G (WHITE), member 4                              | -2.96 | 0.037 | -1.2  | 0.49  | -1.52 | 0.377 | 7     | 0.162 | 0.33  |
| 1450979_at   | Ceacam14      | CEA-related cell adhesion molecule 14                                             | -1.7  | 0.169 | -2.63 | 0.118 | -1.16 | 0.801 | 1     | 0.995 | -1.12 |
| 1457798_at   | C130039O16Rik | RIKEN cDNA C130039O16 gene                                                        | -1.5  | 0.275 | -2.55 | 0.002 | -1.29 | 0.594 | 1.22  | 0.716 | -1.03 |
| 1438779_at   | Col4a3        | procollagen, type IV, alpha 3                                                     | -1.37 | 0.284 | -1.82 | 0.009 | -1.8  | 0.095 | 1.28  | 0.294 | -0.93 |
| 1458775_at   | 1700041E20Rik | RIKEN cDNA 1700041E20 gene                                                        | -1.75 | 0.44  | -1.18 | 0.791 | -2.39 | 0.149 | 2.29  | 0.31  | -0.76 |
| 1437778_at   | Rbm15b        | RNA binding motif protein 15B                                                     | -3.42 | 0.029 | -1.29 | 0.58  | -1.3  | 0.393 | 1.67  | 0.406 | -1.08 |
| 1445675_at   | ---           | Transcribed locus                                                                 | -2.09 | 0.448 | -1.81 | 0.197 | -1.24 | 0.29  | 1.46  | 0.471 | -0.92 |
| 1446181_at   | C85699        | expressed sequence C85699                                                         | -3.7  | 0.462 | -1.07 | 0.733 | -1.58 | 0.084 | 1.52  | 0.49  | -1.21 |
| 1420988_at   | Polh          | polymerase (DNA directed), eta (RAD 30 related)                                   | -1.86 | 0.311 | -1.42 | 0.606 | -1.68 | 0.166 | 2.65  | 0.134 | -0.58 |
| 1444481_at   | ---           | ---                                                                               | -1.8  | 0.569 | -1.62 | 0.182 | -1.5  | 0.188 | 1.45  | 0.357 | -0.87 |
| 1450794_at   | Avp           | arginine vasopressin                                                              | -2.43 | 0.13  | -1.14 | 0.758 | -1.82 | 0.164 | 1.3   | 0.505 | -1.02 |
| 1433217_at   | 4930566N20Rik | RIKEN cDNA 4930566N20 gene                                                        | -1.79 | 0.549 | -2.11 | 0.515 | -1.24 | 0.696 | 1.22  | 0.636 | -0.98 |
| 1453610_at   | 4931406B18Rik | RIKEN cDNA 4931406B18 gene                                                        | -1.43 | 0.085 | -1.82 | 0.114 | -1.69 | 0.239 | 1.39  | 0.091 | -0.89 |
| 1445633_at   | Rex2          | Reduced expression 2                                                              | -1.81 | 0.315 | -2.45 | 0.05  | -1.13 | 0.797 | 1.51  | 0.226 | -0.97 |
| 1448000_at   | Cdca3         | cell division cycle associated 3                                                  | -1.7  | 0.202 | -1.97 | 0.223 | -1.34 | 0.154 | 1.81  | 0.188 | -0.8  |
| 1446665_at   | C80918        | expressed sequence C80918                                                         | -1.12 | 0.517 | -2.12 | 0.102 | -2.09 | 0.122 | 1.02  | 0.969 | -1.08 |
| 1432166_at   | E130018N17Rik | RIKEN cDNA E130018N17 gene                                                        | -4.48 | 0.066 | -1.15 | 0.672 | -1.32 | 0.468 | 3.2   | 0.219 | -0.94 |
| 1420358_at   | Krtap13       | keratin associated protein 13                                                     | -4.46 | 0.008 | -3.2  | 0.003 | 1.31  | 0.701 | -2.05 | 0.109 | -2.1  |
| 1417518_at   | Plagl2        | pleiomorphic adenoma gene-like 2                                                  | -2.87 | 0.015 | -1.31 | 0.524 | -1.35 | 0.502 | 1.08  | 0.782 | -1.11 |
| 1445873_at   | Tfdp2         | Transcription factor Dp 2                                                         | -2.07 | 0.132 | -1.34 | 0.269 | -1.62 | 0.097 | 3.8   | 0.158 | -0.31 |
| 1443332_at   | Slc12a2       | Solute carrier family 12, member 2                                                | -1.33 | 0.225 | -1.95 | 0.482 | -1.71 | 0.179 | 1.33  | 0.523 | -0.91 |
| 1425741_at   | Srgap3        | SLIT-ROBO Rho GTPase activating protein 3                                         | -2.05 | 0.191 | -1.02 | 0.958 | -2.63 | 0.182 | 1.01  | 0.99  | -1.17 |
| 1425563_s_at | Pcdh10        | protocadherin 10                                                                  | -2.8  | 0.031 | -3.63 | 0.277 | 1.22  | 0.659 | -1.33 | 0.297 | -1.63 |
| 1422100_at   | Cyp7a1        | cytochrome P450, family 7, subfamily a, polypeptide 1                             | -3.16 | 0.414 | -1.34 | 0.473 | -1.27 | 0.702 | 2.46  | 0.098 | -0.83 |
| 1441205_at   | ---           | ---                                                                               | -1.56 | 0.298 | -1.02 | 0.942 | -4.25 | 0.027 | 1.19  | 0.683 | -1.41 |
| 1423001_at   | Spred2        | sprouty-related, EVH1 domain containing 2                                         | -1.28 | 0.65  | -1.93 | 0.408 | -1.8  | 0.445 | 2.03  | 0.191 | -0.75 |
| 1459075_at   | AU022479      | expressed sequence AU022479                                                       | -1.14 | 0.676 | -1.42 | 0.312 | -3.69 | 0.031 | 1.38  | 0.678 | -1.22 |
| 1418754_at   | Adcy8         | adenylate cyclase 8                                                               | -1.37 | 0.375 | -1.49 | 0.439 | -2.2  | 0.025 | 2.92  | 0.134 | -0.54 |
| 1444874_at   | Atp5g1        | ATP synthase, H+ transporting, mitochondrial F0 complex, subunit c (subunit 9), i | -1.27 | 0.122 | -2.47 | 0.137 | -1.51 | 0.109 | 2.09  | 0.084 | -0.79 |
| 1444047_at   | Kctd8         | Potassium channel tetramerisation domain containing 8                             | -1.81 | 0.284 | -1.11 | 0.644 | -2.48 | 0.023 | 1.04  | 0.94  | -1.09 |
| 1458725_at   | ---           | ---                                                                               | -1.89 | 0.498 | -2.09 | 0.192 | -1.18 | 0.753 | 2.89  | 0     | -0.57 |
| 1423434_at   | Tead1         | TEA domain family member 1                                                        | -3.22 | 0.085 | -1.69 | 0.343 | -1.05 | 0.912 | 1.93  | 0.362 | -1.01 |

|              |               |                                                                                |       |       |       |       |       |       |       |       |       |
|--------------|---------------|--------------------------------------------------------------------------------|-------|-------|-------|-------|-------|-------|-------|-------|-------|
| 1433284_at   | 4921522E08Rik | RIKEN cDNA 4921522E08 gene                                                     | -3.29 | 0.002 | -2.04 | 0.027 | 1.06  | 0.886 | -1.32 | 0.564 | -1.4  |
| 1429744_at   | 4931407G18Rik | RIKEN cDNA 4931407G18 gene                                                     | -1.48 | 0.297 | -2.49 | 0.337 | -1.29 | 0.396 | 1.1   | 0.715 | -1.04 |
| 1418094_s_at | Car4          | carbonic anhydrase 4                                                           | -1.27 | 0.078 | -1.92 | 0.09  | -1.82 | 0.006 | 1.41  | 0.213 | -0.9  |
| 1418139_at   | Dcx           | doublecortin                                                                   | -1.52 | 0.607 | -1.64 | 0.421 | -1.7  | 0.525 | 1.04  | 0.936 | -0.95 |
| 1432319_at   | 1700085C21Rik | RIKEN cDNA 1700085C21 gene                                                     | -4.18 | 0.002 | 1.34  | 0.523 | -3.54 | 0.07  | -1.02 | 0.953 | -1.85 |
| 1457979_at   | ---           | Adult male hypothalamus cDNA, RIKEN full-length enriched library, clone:A23007 | -2.39 | 0.503 | -3.36 | 0.198 | 1.14  | 0.741 | -1.06 | 0.922 | -1.42 |
| 1426603_at   | Rnasel        | ribonuclease L (2', 5'-oligoadenylate synthetase-dependent)                    | -1.94 | 0.302 | -1.63 | 0.428 | -1.36 | 0.331 | 1.55  | 0.134 | -0.85 |
| 1431486_at   | 4930503E24Rik | RIKEN cDNA 4930503E24 gene                                                     | -1.37 | 0.681 | -2.46 | 0.247 | -1.37 | 0.59  | 1.07  | 0.928 | -1.03 |
| 1422361_at   | Tlm           | T lymphoma oncogene                                                            | -1.44 | 0.588 | -1.5  | 0.389 | -1.97 | 0.01  | 1.5   | 0.139 | -0.85 |
| 1457804_at   | Stx8          | Syntaxin 8                                                                     | -1.34 | 0.004 | -1.19 | 0.722 | -3.61 | 0.008 | 1.71  | 0.43  | -1.11 |
| 1445089_at   | D16ErtD778e   | DNA segment, Chr 16, ERATO Doi 778, expressed                                  | -2.03 | 0.334 | -1.45 | 0.05  | -1.47 | 0.185 | 2.04  | 0.045 | -0.73 |
| 1432812_at   | 4930554P06Rik | RIKEN cDNA 4930554P06 gene                                                     | -1.96 | 0.46  | -1.13 | 0.441 | -2.12 | 0.213 | 1.41  | 0.433 | -0.95 |
| 1445548_at   | Rdx           | Radixin                                                                        | -2.69 | 0.034 | -1.67 | 0.492 | -1.12 | 0.552 | 1.72  | 0.269 | -0.94 |
| 1440601_at   | ---           | Transcribed locus                                                              | -1.19 | 0.337 | -1.72 | 0.144 | -2.23 | 0.216 | 1.14  | 0.831 | -1    |
| 1449717_at   | ---           | ---                                                                            | -1.38 | 0.57  | -1.41 | 0.069 | -2.31 | 0.226 | 1.16  | 0.331 | -0.98 |
| 1456190_a_at | Acsm2         | Acyl-CoA synthetase medium-chain family member 2                               | -1.16 | 0.043 | -3.01 | 0.059 | -1.48 | 0.104 | 1.16  | 0.566 | -1.12 |
| 1436238_at   | Lgi3          | leucine-rich repeat LGI family, member 3                                       | -2.34 | 0.484 | -1.39 | 0.518 | -1.39 | 0.332 | 1.01  | 0.97  | -1.03 |
| 1445139_at   | AV312086      | Expressed sequence AV312086                                                    | -4.17 | 0.231 | -1.37 | 0.256 | -1.11 | 0.731 | 1.08  | 0.9   | -1.39 |
| 1452229_at   | Camta2        | Calmodulin binding transcription activator 2                                   | -1.62 | 0.346 | -1.61 | 0.384 | -1.59 | 0.233 | 1.08  | 0.913 | -0.93 |
| 1420437_at   | Indo          | indoleamine-pyrrole 2,3 dioxygenase                                            | -1.36 | 0.384 | -2.63 | 0.007 | -1.33 | 0.34  | 1.03  | 0.932 | -1.07 |
| 1426034_a_at | Runx2         | runt related transcription factor 2                                            | -1.14 | 0.863 | -3.42 | 0.21  | -1.43 | 0.306 | 1.31  | 0.483 | -1.17 |
| 1443828_x_at | Herpud2       | HERPUD family member 2                                                         | -1.67 | 0.207 | -1.99 | 0.138 | -1.3  | 0.667 | 1.6   | 0.53  | -0.84 |
| 1428209_at   | Bex4          | brain expressed gene 4                                                         | -1.45 | 0.068 | -1.36 | 0.277 | -2.23 | 0.013 | 5.13  | 0.218 | 0.02  |
| 1444515_at   | Myo1d         | Myosin ID                                                                      | -1.71 | 0.159 | -1.45 | 0.185 | -1.67 | 0.036 | 3.16  | 0.14  | -0.42 |
| 1457640_x_at | ---           | Transcribed locus                                                              | -1.8  | 0.153 | -1.73 | 0.267 | -1.35 | 0.265 | 1.41  | 0.433 | -0.87 |
| 1438077_at   | Nalp4a        | NACHT, leucine rich repeat and PYD containing 4A                               | -1.95 | 0.402 | -1.12 | 0.863 | -2.13 | 0.088 | 1.18  | 0.792 | -1    |
| 1443374_at   | ---           | Transcribed locus                                                              | -1.21 | 0.739 | -2.4  | 0.207 | -1.59 | 0.012 | 1.18  | 0.158 | -1    |
| 1417504_at   | Calb1         | calbindin-28K                                                                  | -1.43 | 0.039 | -6.69 | 0.123 | 1.03  | 0.944 | -1.21 | 0.619 | -2.07 |
| 1457931_at   | ---           | ---                                                                            | -1.84 | 0.367 | -1.27 | 0.361 | -1.85 | 0.192 | 1.77  | 0.242 | -0.79 |
| 1442696_at   | Dhcr7         | 7-dehydrocholesterol reductase                                                 | 1.17  | 0.773 | -2.89 | 0.028 | -2.76 | 0.12  | -1.03 | 0.948 | -1.38 |
| 1428002_at   | Saal1         | serum amyloid A-like 1                                                         | -2.1  | 0.078 | -1.26 | 0.651 | -1.65 | 0.227 | 1.39  | 0.419 | -0.9  |
| 1458670_at   | Adarb2        | Adenosine deaminase, RNA-specific, B2                                          | -2.03 | 0.064 | 1.09  | 0.919 | -3.46 | 0     | -1.56 | 0.593 | -1.49 |
| 1421696_at   | Pkhd1l1       | polycystic kidney and hepatic disease 1-like 1                                 | -1.16 | 0.668 | -1.72 | 0.426 | -2.3  | 0.196 | 4.78  | 0.157 | -0.1  |
| 1460531_at   | 2900069M18Rik | RIKEN cDNA 2900069M18 gene                                                     | -1.19 | 0.54  | -2.07 | 0.248 | -1.8  | 0.019 | 1.4   | 0.384 | -0.92 |
| 1446675_at   | Adk           | adenosine kinase                                                               | -1.68 | 0.51  | -1.42 | 0.314 | -1.73 | 0.383 | 1.19  | 0.771 | -0.91 |
| 1418875_at   | Syngn4        | synaptogyrin 4                                                                 | -2.35 | 0.187 | -1.04 | 0.94  | -2.02 | 0.014 | 1.22  | 0.627 | -1.05 |
| 1430859_at   | 5330427O13Rik | RIKEN cDNA 5330427O13 gene                                                     | -1.57 | 0.339 | -1.41 | 0.495 | -1.89 | 0.176 | 1.32  | 0.492 | -0.89 |
| 1441114_at   | 9330156P08Rik | RIKEN cDNA 9330156P08 gene                                                     | -1.1  | 0.385 | -1.8  | 0.011 | -2.39 | 0.031 | 2.43  | 0.252 | -0.72 |
| 1438332_at   | Slc22a6       | solute carrier family 22 (organic anion transporter), member 6                 | -1.19 | 0.445 | -1.62 | 0.482 | -2.37 | 0.219 | 2.14  | 0.19  | -0.76 |
| 1450550_at   | Il5           | interleukin 5                                                                  | -1.83 | 0.229 | -1.39 | 0.23  | -1.62 | 0.344 | 1.89  | 0.188 | -0.74 |
| 1447216_at   | Nrxn1         | neurexin I                                                                     | -1.51 | 0.722 | -1.42 | 0.419 | -1.95 | 0.009 | 1.23  | 0.393 | -0.91 |
| 1458341_x_at | ---           | ---                                                                            | 1.04  | 0.732 | -1.85 | 0.047 | -3.38 | 0.033 | -2.18 | 0.153 | -1.59 |
| 1444694_at   | Tuft1         | Tuftelin 1                                                                     | -1.37 | 0.705 | -2.46 | 0.174 | -1.35 | 0.615 | 1.38  | 0.413 | -0.95 |
| 1458348_at   | ---           | Transcribed locus                                                              | -1.42 | 0.15  | -1.5  | 0.326 | -1.97 | 0.167 | 1.09  | 0.823 | -0.95 |
| 1458272_at   | ---           | Transcribed locus                                                              | -1.53 | 0.448 | -5.25 | 0.002 | 1.04  | 0.945 | -1.35 | 0.342 | -1.77 |
| 1420019_at   | Tspan8        | Tetraspanin 8                                                                  | -1.12 | 0.717 | -2.06 | 0.208 | -1.97 | 0.017 | 2.14  | 0.219 | -0.75 |
| 1454158_at   | Mpp7          | membrane protein, palmitoylated 7 (MAGUK p55 subfamily member 7)               | -1.46 | 0.526 | -1.64 | 0.011 | -1.7  | 0.033 | 1.83  | 0.314 | -0.74 |
| 1456823_at   | Gm70          | gene model 70, (NCBI)                                                          | -2.22 | 0.259 | -2.4  | 0.146 | 1.02  | 0.961 | -1.49 | 0.124 | -1.27 |
| 1439809_at   | Pramel7       | preferentially expressed antigen in melanoma like 7                            | -1.7  | 0.305 | -2.43 | 0.08  | -1.13 | 0.85  | 1.65  | 0.218 | -0.9  |
| 1441715_at   | B130055D15Rik | RIKEN cDNA B130055D15 gene                                                     | -1.85 | 0.209 | -2.06 | 0.341 | -1.16 | 0.413 | 1.07  | 0.829 | -1    |
| 1449989_at   | Mcpt2         | mast cell protease 2                                                           | -3.39 | 0.001 | -1.05 | 0.954 | -1.58 | 0.483 | 1.25  | 0.69  | -1.19 |
| 1420211_at   | ---           | ---                                                                            | -1.64 | 0.475 | -1.81 | 0.255 | -1.38 | 0.441 | 1.35  | 0.246 | -0.87 |
| 1444295_at   | Neo1          | neogenin                                                                       | -1.15 | 0.739 | -2.07 | 0.229 | -1.88 | 0.132 | 1.6   | 0.036 | -0.87 |

|              |                   |                                                                               |       |       |       |       |       |       |       |       |       |
|--------------|-------------------|-------------------------------------------------------------------------------|-------|-------|-------|-------|-------|-------|-------|-------|-------|
| 1445811_at   | Nedd8             | Neural precursor cell expressed, developmentally down-regulated gene 8        | -1.37 | 0.369 | -1.77 | 0.086 | -1.69 | 0.388 | 1.21  | 0.553 | -0.91 |
| 1441179_at   | 9530020O07Rik     | RIKEN cDNA 9530020O07 gene                                                    | -1.36 | 0.538 | -1.58 | 0.287 | -1.93 | 0.205 | 1.41  | 0.648 | -0.86 |
| 1460296_a_at | Fgf22             | fibroblast growth factor 22                                                   | -1.54 | 0.674 | -1.36 | 0.658 | -1.99 | 0.165 | 1.02  | 0.935 | -0.97 |
| 1444225_at   | Sgip1             | SH3-domain GRB2-like (endophilin) interacting protein 1                       | -1.22 | 0.457 | -2.92 | 0.21  | -1.38 | 0.438 | 1.18  | 0.734 | -1.08 |
| 1418882_at   | Nalp5             | NACHT, leucine rich repeat and PYD containing 5                               | -3.05 | 0.329 | -2.17 | 0.249 | 1.1   | 0.685 | -1.1  | 0.816 | -1.3  |
| 1429263_at   | 4933425D22Rik     | RIKEN cDNA 4933425D22 gene                                                    | -1.88 | 0.108 | -2.05 | 0.12  | -1.15 | 0.135 | 1.34  | 0.608 | -0.94 |
| 1429975_at   | 4931432M23Rik /// | RIKEN cDNA 4931432M23 gene ///<br>similar to plasma kallikrein-like protein 4 | -1.18 | 0.605 | -3.7  | 0.001 | -1.3  | 0.626 | 1.48  | 0.07  | -1.17 |
| 1430803_at   | Lin28b            | lin-28 homolog B (C. elegans)                                                 | -1.11 | 0.901 | -2.39 | 0.123 | -1.76 | 0.228 | 2.45  | 0.098 | -0.7  |
| 1420146_at   | ---               | ---                                                                           | -2.03 | 0.348 | -1.55 | 0.392 | -1.33 | 0.141 | 1.34  | 0.565 | -0.89 |
| 1447661_at   | ---               | Transcribed locus                                                             | -1.37 | 0.704 | -1.94 | 0.337 | -1.56 | 0.251 | 2.23  | 0.012 | -0.66 |
| 1438851_x_at | Cldn1             | claudin 1                                                                     | -1.39 | 0.632 | -3.07 | 0.018 | -1.18 | 0.725 | 2.32  | 0.023 | -0.83 |
| 1420698_at   | Gpx5              | glutathione peroxidase 5                                                      | -1.76 | 0.455 | -3.73 | 0.297 | 1.05  | 0.663 | -1.22 | 0.185 | -1.42 |
| 1422890_at   | Pcdh18            | protocadherin 18                                                              | -1.51 | 0.026 | -1.39 | 0.266 | -1.97 | 0.278 | 1.11  | 0.802 | -0.94 |
| 1434136_at   | 6332401O19Rik     | RIKEN cDNA 6332401O19 gene                                                    | -1.27 | 0.31  | -1.47 | 0.448 | -2.35 | 0.139 | 1.78  | 0.255 | -0.83 |
| 1443652_x_at | Spred1            | sprouty protein with EVH-1 domain 1, related sequence                         | -2.47 | 0.244 | -1.56 | 0.179 | -1.18 | 0.816 | 2.32  | 0.344 | -0.72 |
| 1444630_at   | D2Etd127e         | DNA segment, Chr 2, ERATO Doi 127, expressed                                  | -1.52 | 0.334 | -2.3  | 0.246 | -1.25 | 0.511 | 1.51  | 0.058 | -0.89 |
| 1446197_at   | Lphn3             | Latrophilin 3                                                                 | -1.16 | 0.532 | -4.48 | 0.034 | -1.24 | 0.688 | 1.29  | 0.776 | -1.4  |
| 1446763_at   | Kcnh1             | Potassium voltage-gated channel, subfamily H (eag-related), member 1          | -1.99 | 0.348 | -1.49 | 0.467 | -1.39 | 0.117 | 1.1   | 0.647 | -0.94 |
| 1446104_at   | Srgap3            | SLIT-ROBO Rho GTPase activating protein 3                                     | -1.58 | 0.205 | -1.4  | 0.121 | -1.84 | 0.198 | 1.03  | 0.78  | -0.95 |
| 1445190_at   | Golph4            | golgi phosphoprotein 4                                                        | -1.79 | 0.563 | -2.11 | 0.117 | -1.16 | 0.661 | 1.06  | 0.939 | -1    |
| 1445309_at   | ---               | ---                                                                           | -2.4  | 0.015 | -2.16 | 0.013 | 1.01  | 0.966 | -1.51 | 0.417 | -1.26 |
| 1444953_at   | Nucks1            | Nuclear casein kinase and cyclin-dependent kinase substrate 1                 | -2.72 | 0.098 | -1.21 | 0.728 | -1.43 | 0.337 | 1.1   | 0.847 | -1.07 |
| 1458492_x_at | Hnt               | neurotrimin                                                                   | -1.58 | 0.543 | -1.83 | 0.084 | -1.4  | 0.242 | 1.29  | 0.569 | -0.88 |
| 1458244_at   | Tmco5             | transmembrane and coiled-coil domains 5                                       | -1.25 | 0.716 | -1.91 | 0.069 | -1.75 | 0.174 | 1.78  | 0.23  | -0.78 |
| 1444168_at   | Xpr1              | xenotropic and polytropic retrovirus receptor 1                               | -1.1  | 0.876 | -2.68 | 0.051 | -1.63 | 0.168 | 1.01  | 0.97  | -1.1  |
| 1429697_at   | 1700023D19Rik     | RIKEN cDNA 1700023D19 gene                                                    | -1.51 | 0.434 | -1.45 | 0.188 | -1.85 | 0.213 | 1.7   | 0.465 | -0.78 |
| 1446419_at   | ---               | ---                                                                           | 1.16  | 0.548 | -3.41 | 0.168 | -2.28 | 0.367 | -1.57 | 0.187 | -1.52 |
| 1443912_at   | ---               | ---                                                                           | -2.4  | 0.089 | -1.3  | 0.606 | -1.41 | 0.41  | 2.81  | 0.188 | -0.58 |
| 1433483_s_at | C86187            | expressed sequence C86187                                                     | -1.07 | 0.866 | -1.79 | 0.268 | -2.46 | 0.035 | 1.11  | 0.343 | -1.05 |
| 1459149_at   | ---               | ---                                                                           | -1.37 | 0.141 | -1.84 | 0.23  | -1.6  | 0.15  | 1.65  | 0.355 | -0.79 |
| 1447572_at   | 1700052I22Rik     | RIKEN cDNA 1700052I22 gene                                                    | -3.33 | 0.027 | -1.01 | 0.981 | -1.63 | 0.325 | 1.51  | 0.61  | -1.12 |
| 1442632_at   | Centg2            | Centaurin, gamma 2                                                            | -1.66 | 0.166 | -1.44 | 0.189 | -1.66 | 0.148 | 1.25  | 0.375 | -0.88 |
| 1460746_at   | Fignl1            | fidgetin-like 1                                                               | -1.49 | 0.002 | -2.01 | 0.049 | -1.37 | 0.156 | 1.73  | 0.335 | -0.79 |
| 1454513_at   | 9430031J08Rik     | RIKEN cDNA 9430031J08 gene                                                    | -2.39 | 0.174 | -1.29 | 0.616 | -1.41 | 0.123 | 1.41  | 0.49  | -0.92 |
| 1422722_at   | 1700001K19Rik     | RIKEN cDNA 1700001K19 gene                                                    | -1.76 | 0.466 | -1.57 | 0.386 | -1.44 | 0.452 | 1.07  | 0.836 | -0.92 |
| 1458930_at   | A4gnt             | alpha-1,4-N-acetylglucosaminyltransferase                                     | -1.31 | 0.094 | -1.83 | 0.168 | -1.7  | 0.184 | 1.41  | 0.14  | -0.86 |
| 1425770_at   | A730028G07Rik     | RIKEN cDNA A730028G07 gene                                                    | -4.91 | 0.359 | -1.86 | 0.248 | 1.16  | 0.283 | -1.06 | 0.777 | -1.67 |
| 1442742_at   | Atp2c1            | ATPase, Ca++-sequestering                                                     | -1.27 | 0.222 | -3.17 | 0.113 | -1.26 | 0.249 | 1.25  | 0.325 | -1.11 |
| 1441752_at   | Art3              | ADP-ribosyltransferase 3                                                      | -1.7  | 0.481 | -1.52 | 0.437 | -1.53 | 0.182 | 1.74  | 0.259 | -0.75 |
| 1445795_at   | Chka              | choline kinase alpha                                                          | -3.08 | 0.246 | 1.15  | 0.646 | -2.33 | 0.034 | -1.12 | 0.857 | -1.34 |
| 1443725_at   | ---               | ---                                                                           | -2.31 | 0.12  | -1.22 | 0.606 | -1.54 | 0.35  | 2.56  | 0.154 | -0.62 |
| 1421764_at   | V1rd9             | vomeroneasal 1 receptor, D9                                                   | -2.02 | 0.472 | -1.7  | 0.122 | -1.22 | 0.239 | 1.76  | 0.244 | -0.79 |
| 1425218_a_at | Scgb3a2           | secretoglobulin, family 3A, member 2                                          | -1.94 | 0.006 | -1.53 | 0.344 | -1.36 | 0.005 | 1.2   | 0.303 | -0.91 |
| 1429663_at   | Katnal2           | katanin p60 subunit A-like 2                                                  | -2.43 | 0.209 | -1.72 | 0.161 | -1.1  | 0.593 | 1.15  | 0.764 | -1.02 |
| 1458982_at   | AU014965          | expressed sequence AU014965                                                   | -2.24 | 0.034 | -2.13 | 0.081 | -1.01 | 0.985 | 2.85  | 0.324 | -0.63 |
| 1456549_at   | Gm550             | gene model 550, (NCBI)                                                        | -1.27 | 0.614 | -1.47 | 0.33  | -2.28 | 0.013 | 1.42  | 0.313 | -0.9  |
| 1443865_at   | Gabra2            | gamma-aminobutyric acid (GABA-A) receptor, subunit alpha 2                    | 1.07  | 0.931 | -3.79 | 0.016 | -1.76 | 0.043 | -3.58 | 0.011 | -2.01 |
| 1447899_x_at | Tacstd1           | tumor-associated calcium signal transducer 1                                  | -1.5  | 0.136 | -1.85 | 0.178 | -1.43 | 0.095 | 1.11  | 0.743 | -0.92 |
| 1446656_at   | Angpt1            | Angiopoietin 1                                                                | -1.64 | 0.05  | -1.44 | 0.035 | -1.66 | 0.05  | 1.02  | 0.961 | -0.93 |
| 1429200_at   | Saal1             | serum amyloid A-like 1                                                        | -1.09 | 0.927 | -2.55 | 0.151 | -1.67 | 0.012 | 1.04  | 0.931 | -1.07 |
| 1419822_at   | Eif3s6            | Eukaryotic translation initiation factor 3, subunit 6                         | -1.55 | 0.161 | -1.33 | 0.587 | -1.96 | 0.043 | 1.11  | 0.886 | -0.93 |
| 1430765_at   | 5730521K06Rik     | RIKEN cDNA 5730521K06 gene                                                    | -1.69 | 0.535 | -2.13 | 0.052 | -1.18 | 0.613 | 1.01  | 0.948 | -1    |
| 1443194_at   | ---               | ---                                                                           | -1.09 | 0.919 | -1.56 | 0.514 | -2.84 | 0.015 | 1.04  | 0.929 | -1.11 |

|              |                    |                                                                                         |       |       |       |       |       |       |       |       |       |
|--------------|--------------------|-----------------------------------------------------------------------------------------|-------|-------|-------|-------|-------|-------|-------|-------|-------|
| 1421293_at   | Hdgfl1             | hepatoma derived growth factor-like 1                                                   | 1.02  | 0.976 | -2.29 | 0.034 | -2.19 | 0.045 | -1.05 | 0.944 | -1.13 |
| 1430877_at   | 8030425K09Rik      | RIKEN cDNA 8030425K09 gene                                                              | -2.25 | 0.477 | -1.33 | 0.052 | -1.4  | 0.471 | 1.3   | 0.069 | -0.92 |
| 1443876_at   | Camk2a             | Calcium/calmodulin-dependent protein kinase II alpha                                    | -1.45 | 0.528 | -3.95 | 0.027 | -1.03 | 0.921 | 1.82  | 0.28  | -1.15 |
| 1444990_at   | Hivep2             | Human immunodeficiency virus type I enhancer binding protein 2                          | -1.72 | 0.255 | -1.38 | 0.347 | -1.65 | 0.051 | 1.41  | 0.462 | -0.83 |
| 1442936_at   | Dsg3               | Desmoglein 3                                                                            | -3.46 | 0.028 | -1.8  | 0.069 | 1.07  | 0.743 | -1.68 | 0.481 | -1.47 |
| 1429791_at   | A930004D18Rik      | RIKEN cDNA A930004D18 gene                                                              | -1.86 | 0.299 | -1.01 | 0.947 | -2.56 | 0.038 | 1.05  | 0.932 | -1.1  |
| 1450094_at   | Ranbp17            | RAN binding protein 17                                                                  | -3.13 | 0.447 | -1.37 | 0.401 | -1.16 | 0.785 | 1.69  | 0.447 | -0.99 |
| 1460111_at   | Myt1l              | myelin transcription factor 1-like                                                      | -2.87 | 0.002 | 1.03  | 0.948 | -1.86 | 0.051 | -2.73 | 0.069 | -1.61 |
| 1442457_at   | ---                | ---                                                                                     | -2.98 | 0.334 | -1.1  | 0.803 | -1.48 | 0.397 | 1.57  | 0.413 | -1    |
| 1435054_at   | Eme1               | essential meiotic endonuclease 1 homolog 1 (S. pombe)                                   | -1.6  | 0.606 | -1.48 | 0.488 | -1.62 | 0.223 | 2.47  | 0.276 | -0.56 |
| 1426309_at   | Asb9               | ankyrin repeat and SOCS box-containing protein 9                                        | -1.47 | 0.033 | -1.38 | 0.102 | -1.97 | 0.297 | 1.1   | 0.846 | -0.93 |
| 1435895_at   | D930023J12Rik      | RIKEN cDNA D930023J12 gene                                                              | -2.57 | 0.165 | -1.35 | 0.556 | -1.27 | 0.376 | 1.14  | 0.691 | -1.01 |
| 1440212_at   | ---                | ---                                                                                     | -1.23 | 0.287 | -2.27 | 0.339 | -1.5  | 0.483 | 1.04  | 0.961 | -0.99 |
| 1439598_at   | Foxo3a             | Forkhead box O3a                                                                        | -1.61 | 0.181 | -1.28 | 0.031 | -1.94 | 0.05  | 1.64  | 0.254 | -0.8  |
| 1458635_at   | 4832428D23Rik      | RIKEN cDNA 4832428D23 gene                                                              | -1.92 | 0.516 | 1     | 0.999 | -2.53 | 0.148 | -1.39 | 0.678 | -1.21 |
| 1454417_at   | 4933408M05Rik      | RIKEN cDNA 4933408M05 gene                                                              | -1.79 | 0.495 | -2    | 0.262 | -1.17 | 0.638 | 1.01  | 0.983 | -0.98 |
| 1429657_at   | Zfand5             | zinc finger, AN1-type domain 5                                                          | -2.75 | 0.051 | -1.16 | 0.832 | -1.45 | 0.188 | 1.76  | 0.317 | -0.9  |
| 1430824_at   | Arhgap23           | Rho GTPase activating protein 23                                                        | -1.76 | 0.055 | -1.09 | 0.749 | -2.32 | 0.042 | 1.85  | 0.396 | -0.83 |
| 1430874_at   | 9430085M18Rik      | RIKEN cDNA 9430085M18 gene                                                              | -1.14 | 0.663 | -2.03 | 0.504 | -1.82 | 0.19  | 1.49  | 0.191 | -0.87 |
| 1449479_at   | Cyp2b13            | cytochrome P450, family 2, subfamily b, polypeptide 13                                  | -2.74 | 0.07  | -1.55 | 0.471 | -1.1  | 0.681 | 1.93  | 0.017 | -0.87 |
| 1443658_at   | D8Ert457e          | DNA segment, Chr 8, ERATO Doi 457, expressed                                            | 1.17  | 0.741 | -2.54 | 0.016 | -2.85 | 0.047 | -1.05 | 0.163 | -1.32 |
| 1459692_at   | Al661323           | expressed sequence Al661323                                                             | -2.27 | 0.025 | -1.26 | 0.757 | -1.45 | 0.115 | 8.85  | 0.156 | 0.97  |
| 1444631_at   | Zfp410             | Zinc finger protein 410                                                                 | -1.54 | 0.575 | -1.59 | 0.443 | -1.56 | 0.403 | 2.31  | 0.327 | -0.59 |
| 1429992_at   | Speer4b            | spermatogenesis associated glutamate (E)-rich protein 4b                                | -1.88 | 0.538 | -2.09 | 0.233 | -1.1  | 0.653 | 1.11  | 0.859 | -0.99 |
| 1446202_at   | ---                | Transcribed locus                                                                       | -2.56 | 0.155 | -1.07 | 0.931 | -1.69 | 0.357 | 1.23  | 0.656 | -1.02 |
| 1423915_at   | Olfml2b            | olfactomedin-like 2B                                                                    | -2.36 | 0.266 | -1.33 | 0.376 | -1.34 | 0.154 | 1.8   | 0.284 | -0.81 |
| 1456456_x_at | Mela               | Melanoma antigen                                                                        | -1.84 | 0.329 | -1.25 | 0.635 | -1.73 | 0.388 | 1.97  | 0.499 | -0.71 |
| 1424146_at   | Gpr37l1            | G protein-coupled receptor 37-like 1                                                    | -1.18 | 0.528 | -2.14 | 0.152 | -1.64 | 0.381 | 1.15  | 0.678 | -0.95 |
| 1448911_at   | Atp4b              | ATPase, H+/K+ exchanging, beta polypeptide                                              | -5.87 | 0.006 | -1.68 | 0.074 | 1.16  | 0.427 | -1.7  | 0.41  | -2.02 |
| 1420354_at   | Cnnm1              | cyclin M1                                                                               | -1.43 | 0.462 | -1.94 | 0.342 | -1.41 | 0.566 | 1.21  | 0.803 | -0.89 |
| 1420418_at   | Syt2               | synaptotagmin II                                                                        | -1.79 | 0.425 | -1.89 | 0.337 | -1.2  | 0.604 | 1.42  | 0.57  | -0.86 |
| 1428460_at   | Syn2               | synapsin II                                                                             | -1.45 | 0.224 | -3.47 | 0.327 | -1.06 | 0.885 | 1.12  | 0.836 | -1.21 |
| 1444262_at   | 1110017F19Rik      | RIKEN cDNA 1110017F19 gene                                                              | -1.21 | 0.286 | -1.9  | 0.072 | -1.74 | 0.021 | 3.08  | 0.295 | -0.44 |
| 1441398_at   | ---                | ---                                                                                     | -1.97 | 0.339 | -1.04 | 0.93  | -2.19 | 0.05  | 1.28  | 0.364 | -0.98 |
| 1440256_at   | Rgs9bp             | regulator of G-protein signalling 9 binding protein                                     | -1.22 | 0.727 | -1.82 | 0.15  | -1.8  | 0.368 | 1.21  | 0.106 | -0.91 |
| 1433186_at   | 2610019A05Rik      | RIKEN cDNA 2610019A05 gene                                                              | -2.17 | 0.182 | -1.35 | 0.357 | -1.38 | 0.335 | 1.41  | 0.229 | -0.87 |
| 1456289_at   | Hamp2 /// Hamp1    | hepcidin antimicrobial peptide 2 /// hepcidin antimicrobial peptide 1                   | -1.86 | 0.315 | -1.32 | 0.355 | -1.58 | 0.21  | 2.61  | 0.376 | -0.54 |
| 1460480_at   | 1600014E20Rik      | RIKEN cDNA 1600014E20 gene                                                              | -1.26 | 0.743 | -1.73 | 0.018 | -1.79 | 0.037 | 1.34  | 0.657 | -0.86 |
| 1447110_at   | 4921513D23Rik      | RIKEN cDNA 4921513D23 gene                                                              | -2.55 | 0.011 | -1.03 | 0.933 | -1.77 | 0.181 | 1.15  | 0.493 | -1.05 |
| 1419214_at   | Tnfrsf11a          | tumor necrosis factor receptor superfamily, member 11a                                  | -1.83 | 0.32  | -1.49 | 0.204 | -1.41 | 0.189 | 1.83  | 0.12  | -0.72 |
| 1447714_x_at | ---                | Transcribed locus                                                                       | -2.35 | 0.127 | -2.1  | 0.298 | 1.03  | 0.958 | -2.17 | 0.097 | -1.4  |
| 1460683_at   | Tead4              | TEA domain family member 4                                                              | -1.26 | 0.32  | -1.37 | 0.281 | -2.46 | 0.232 | 1.44  | 0.135 | -0.91 |
| 1434324_x_at | Eif3s3 /// LOC6250 | eukaryotic translation initiation factor 3, subunit 3 (gamma) /// similar to eukaryotic | -2.08 | 0.219 | -1.18 | 0.42  | -1.66 | 0.38  | 1.03  | 0.93  | -0.97 |
| 1448039_at   | LOC622175          | Similar to gonadotropin inducible ovarian transcription factor 2                        | -3.06 | 0.444 | 1.07  | 0.928 | -1.87 | 0.292 | -1.04 | 0.878 | -1.23 |
| 1445679_at   | Atp2b3             | ATPase, Ca++ transporting, plasma membrane 3                                            | -2.48 | 0.124 | 1.11  | 0.527 | -2.41 | 0.015 | -2.09 | 0.255 | -1.47 |
| 1446668_at   | ---                | PREDICTED: Mus musculus similar to sidekick homolog 1 (LOC620969), mRNA                 | -3.6  | 0.255 | -2.02 | 0.335 | 1.16  | 0.801 | -1.41 | 0.366 | -1.47 |
| 1443580_at   | Stxbp6             | Syntaxin binding protein 6 (amisyn)                                                     | -1.98 | 0.467 | -1.33 | 0.662 | -1.49 | 0.546 | 2.22  | 0.055 | -0.65 |
| 1441847_at   | Mast2              | Microtubule associated serine/threonine kinase 2                                        | -1.2  | 0.831 | -1.96 | 0.047 | -1.72 | 0.337 | 2.81  | 0.313 | -0.51 |
| 1439865_at   | Kbtbd7             | kelch repeat and BTB (POZ) domain containing 7                                          | -2.72 | 0.337 | -1.4  | 0.005 | -1.18 | 0.063 | 1.46  | 0.43  | -0.96 |
| 1421975_a_at | Add2               | adducin 2 (beta)                                                                        | -1.74 | 0.269 | -1.11 | 0.863 | -2.18 | 0.331 | 5.63  | 0.172 | 0.15  |
| 1446355_at   | 9530085L11Rik      | RIKEN cDNA 9530085L11 gene                                                              | -2.01 | 0.319 | -1.82 | 0.25  | -1.13 | 0.606 | 1.55  | 0.447 | -0.85 |
| 1457830_at   | Net1               | Neuroepithelial cell transforming gene 1                                                | -1.74 | 0.058 | -1.3  | 0.287 | -1.71 | 0.039 | 1.75  | 0.322 | -0.75 |
| 1436786_at   | 1110069O07Rik      | RIKEN cDNA 1110069O07 gene                                                              | -1.95 | 0.243 | -1.61 | 0.324 | -1.26 | 0.007 | 1.16  | 0.794 | -0.91 |

|              |               |                                                                                 |       |       |        |       |       |       |       |       |       |
|--------------|---------------|---------------------------------------------------------------------------------|-------|-------|--------|-------|-------|-------|-------|-------|-------|
| 1441776_at   | Tspan11       | tetraspanin 11                                                                  | -1.79 | 0.381 | -1.54  | 0.056 | -1.38 | 0.401 | 1.1   | 0.836 | -0.9  |
| 1456931_at   | C85363        | expressed sequence C85363                                                       | -1.22 | 0.061 | -1.71  | 0.264 | -1.89 | 0.093 | 1.02  | 0.942 | -0.95 |
| 1424679_at   | Mab2111       | mab-21-like 1 (C. elegans)                                                      | -1.59 | 0.496 | -3.21  | 0.137 | -1.01 | 0.987 | 1.59  | 0.118 | -1.05 |
| 1420807_a_at | Egfl9         | EGF-like-domain, multiple 9                                                     | -1.54 | 0.088 | -2.09  | 0.196 | -1.25 | 0.625 | 1.64  | 0.563 | -0.81 |
| 1421349_x_at | Cend1         | cell cycle exit and neuronal differentiation 1                                  | -1.08 | 0.829 | -2.36  | 0.217 | -1.7  | 0.357 | 1.01  | 0.99  | -1.04 |
| 1457409_at   | Fut9          | fucosyltransferase 9                                                            | -1.05 | 0.912 | -3.3   | 0.152 | -1.47 | 0.576 | 1.04  | 0.902 | -1.2  |
| 1444784_at   | 4930564K09Rik | RIKEN cDNA 4930564K09 gene                                                      | -1.81 | 0.141 | -1.18  | 0.805 | -1.88 | 0.139 | 1.24  | 0.467 | -0.91 |
| 1444190_at   | E030049G20Rik | RIKEN cDNA E030049G20 gene                                                      | -1.79 | 0.012 | -1.26  | 0.491 | -1.73 | 0.088 | 1.03  | 0.953 | -0.94 |
| 1446920_at   | E130308A19Rik | RIKEN cDNA E130308A19 gene                                                      | -1.49 | 0.096 | -1.37  | 0.324 | -1.88 | 0.005 | 1.75  | 0.271 | -0.75 |
| 1446641_at   | Syt7          | Synaptotagmin VII                                                               | -2.22 | 0.139 | -1.67  | 0.033 | -1.13 | 0.778 | 1.16  | 0.722 | -0.97 |
| 1445614_at   | ---           | ---                                                                             | -1.81 | 0.177 | -1.28  | 0.678 | -1.67 | 0.23  | 1.29  | 0.692 | -0.87 |
| 1427122_at   | Copg2as2      | coatomer protein complex, subunit gamma 2, antisense 2                          | -2.43 | 0.454 | -1.17  | 0.766 | -1.49 | 0.116 | 1.28  | 0.762 | -0.95 |
| 1447269_at   | 9630031F12Rik | RIKEN cDNA 9630031F12 gene                                                      | -1.09 | 0.727 | -2.88  | 0.087 | -1.49 | 0.139 | 1.04  | 0.934 | -1.11 |
| 1445977_at   | AU022793      | expressed sequence AU022793                                                     | -1.21 | 0.798 | -1.7   | 0.202 | -1.9  | 0.403 | 1.64  | 0.227 | -0.79 |
| 1426252_a_at | Umod          | uromodulin                                                                      | -1.13 | 0.049 | -11.04 | 0.133 | -1.04 | 0.95  | 1.73  | 0.23  | -2.87 |
| 1446926_at   | Pycard        | PYD and CARD domain containing                                                  | -1.27 | 0.445 | -2.56  | 0.01  | -1.31 | 0.103 | 1.11  | 0.609 | -1.01 |
| 1432045_at   | Tssk5         | testis-specific serine kinase 5                                                 | -1.83 | 0.323 | -2.09  | 0.366 | -1.1  | 0.765 | 2.34  | 0.005 | -0.67 |
| 1449522_at   | Unc5c         | unc-5 homolog C (C. elegans)                                                    | -1.59 | 0.004 | -1.49  | 0.428 | -1.57 | 0.054 | 1.05  | 0.786 | -0.9  |
| 1426166_at   | Mup5          | major urinary protein 5                                                         | -1.44 | 0.496 | -1.56  | 0.087 | -1.66 | 0.047 | 1.37  | 0.58  | -0.82 |
| 1430470_at   | 5730411F24Rik | RIKEN cDNA 5730411F24 gene                                                      | -1.63 | 0.236 | -1.64  | 0.062 | -1.4  | 0.008 | 1.08  | 0.617 | -0.9  |
| 1433347_at   | A930036A04Rik | RIKEN cDNA A930036A04 gene                                                      | -1.5  | 0.553 | -1.08  | 0.893 | -2.89 | 0.04  | 1.33  | 0.659 | -1.04 |
| 1428089_at   | Slitrk1       | SLIT and NTRK-like family, member 1                                             | -2.4  | 0.155 | -1.93  | 0.293 | 1     | 0.996 | -1.39 | 0.245 | -1.18 |
| 1457546_at   | Cnot1         | CCR4-NOT transcription complex, subunit 1                                       | -1.56 | 0.403 | -1.26  | 0.634 | -1.99 | 0.11  | 1.43  | 0.271 | -0.84 |
| 1457894_at   | ---           | ---                                                                             | -2.29 | 0.026 | -1.08  | 0.852 | -1.72 | 0.209 | 2.31  | 0.141 | -0.69 |
| 1444707_at   | ---           | Transcribed locus                                                               | 1.01  | 0.987 | -3.16  | 0.056 | -1.62 | 0.351 | -1.26 | 0.412 | -1.26 |
| 1432838_at   | 6430598H11Rik | RIKEN cDNA 6430598H11 gene                                                      | 1     | 0.99  | -3.08  | 0.091 | -1.63 | 0.412 | -2.5  | 0.299 | -1.55 |
| 1431683_at   | 4930473H19Rik | RIKEN cDNA 4930473H19 gene                                                      | 1.08  | 0.893 | -2.01  | 0.349 | -2.72 | 0.07  | -1.22 | 0.622 | -1.22 |
| 1453660_at   | 5430420F09Rik | RIKEN cDNA 5430420F09 gene                                                      | -1.02 | 0.919 | -2.53  | 0.005 | -1.76 | 0.067 | 1.26  | 0.604 | -1.01 |
| 1439385_x_at | Slc13a3       | Solute carrier family 13 (sodium-dependent dicarboxylate transporter), member 3 | -1.87 | 0.377 | -1.44  | 0.355 | -1.4  | 0.325 | 3.19  | 0.004 | -0.38 |
| 1424855_at   | Olah          | oleoyl-ACP hydrolase                                                            | -1.87 | 0.074 | -1.84  | 0.525 | -1.15 | 0.752 | 1.06  | 0.731 | -0.95 |
| 1422312_a_at | Neurog3       | neurogenin 3                                                                    | -1.44 | 0.34  | -1.73  | 0.436 | -1.48 | 0.431 | 1.52  | 0.465 | -0.78 |
| 1437219_at   | Igf1r         | Insulin-like growth factor I receptor                                           | -1.5  | 0.028 | -1.41  | 0.29  | -1.75 | 0.02  | 1.09  | 0.706 | -0.89 |
| 1449378_at   | Krt27         | keratin 27                                                                      | -3.08 | 0.351 | 1.1    | 0.107 | -1.91 | 0.2   | -1.22 | 0.74  | -1.28 |
| 1444756_at   | ---           | Transcribed locus                                                               | -1.18 | 0.532 | -1.54  | 0.44  | -2.2  | 0.353 | 1.02  | 0.946 | -0.98 |
| 1421711_at   | Zfp109        | zinc finger protein 109                                                         | -2.59 | 0.218 | -1.77  | 0.067 | -1    | 0.988 | 1.15  | 0.768 | -1.05 |
| 1432294_at   | 9330177L23Rik | RIKEN cDNA 9330177L23 gene                                                      | -1.23 | 0.58  | -2.6   | 0.292 | -1.34 | 0.277 | 1.19  | 0.829 | -0.99 |
| 1438387_x_at | Top3b         | topoisomerase (DNA) III beta                                                    | -1.75 | 0.078 | -1.5   | 0.066 | -1.41 | 0.444 | 1.73  | 0.27  | -0.73 |
| 1444414_at   | Apod          | Apolipoprotein D                                                                | -2.28 | 0.356 | -1.02  | 0.961 | -1.88 | 0.121 | 1.26  | 0.738 | -0.98 |
| 1424848_at   | Kcnma1        | potassium large conductance calcium-activated channel, subfamily M, alpha men   | -1.05 | 0.938 | -1.69  | 0.381 | -2.49 | 0.03  | 2.55  | 0.062 | -0.67 |
| 1449513_at   | Adam24        | a disintegrin and metallopeptidase domain 24 (testase 1)                        | -1.7  | 0.248 | -1.17  | 0.487 | -1.98 | 0.31  | 1.01  | 0.95  | -0.96 |
| 1450553_at   | Hoxd12        | homeo box D12                                                                   | -1.17 | 0.65  | -2.99  | 0.259 | -1.32 | 0.421 | 1.01  | 0.977 | -1.12 |
| 1444565_at   | BB166591      | expressed sequence BB166591                                                     | -1.29 | 0.093 | -1.3   | 0.227 | -2.45 | 0.013 | 2.6   | 0.238 | -0.61 |
| 1438333_at   | Prtg          | protogenin homolog (Gallus gallus)                                              | -2.36 | 0.431 | -2.86  | 0.041 | 1.18  | 0.783 | -1.51 | 0.341 | -1.39 |
| 1434501_at   | ---           | ---                                                                             | -1.51 | 0.316 | -1.11  | 0.872 | -2.61 | 0.101 | 5.44  | 0.191 | 0.05  |
| 1447487_at   | ---           | ---                                                                             | -3.59 | 0.322 | -2.24  | 0.129 | 1.22  | 0.648 | -1.03 | 0.962 | -1.41 |
| 1425976_x_at | Zfp353        | zinc finger protein 353                                                         | -3.27 | 0.081 | 1.04   | 0.953 | -1.67 | 0.465 | -1.06 | 0.849 | -1.24 |
| 1432945_at   | 5230400M06Rik | RIKEN cDNA 5230400M06 gene                                                      | -3.04 | 0.12  | -2.42  | 0.141 | 1.21  | 0.639 | -1.29 | 0.354 | -1.39 |
| 1444297_at   | Serpina4-ps1  | serine (or cysteine) peptidase inhibitor, clade A, member 4, pseudogene 1       | 1.39  | 0.597 | -24.88 | 0.181 | -1.91 | 0.278 | -1.08 | 0.538 | -6.62 |
| 1453094_at   | Ches1         | checkpoint suppressor 1                                                         | -1.47 | 0.06  | -2.41  | 0     | -1.17 | 0.323 | 1.24  | 0.634 | -0.95 |
| 1456305_x_at | LOC666466     | similar to oocyte specific homeobox 2                                           | -1.4  | 0.355 | -1.53  | 0.208 | -1.71 | 0.559 | 1.43  | 0.536 | -0.8  |
| 1433578_at   | Slc10a4       | solute carrier family 10 (sodium/bile acid cotransporter family), member 4      | -1.44 | 0.722 | -2.79  | 0.017 | -1.11 | 0.276 | 1.02  | 0.912 | -1.08 |
| 1459222_x_at | ---           | ---                                                                             | -2.45 | 0.029 | -1.02  | 0.957 | -1.78 | 0.229 | 1.5   | 0.428 | -0.94 |
| 1428804_at   | Mfap3l        | microfibrillar-associated protein 3-like                                        | -1.13 | 0.513 | -1.61  | 0.256 | -2.23 | 0.001 | 1.65  | 0.414 | -0.83 |

|              |                    |                                                                                |       |       |       |       |       |       |       |       |       |
|--------------|--------------------|--------------------------------------------------------------------------------|-------|-------|-------|-------|-------|-------|-------|-------|-------|
| 1440199_at   | AU042651           | expressed sequence AU042651                                                    | -1.46 | 0.245 | -1.11 | 0.844 | -2.73 | 0.085 | 1.1   | 0.902 | -1.05 |
| 1421695_at   | Strc               | stereocilin                                                                    | -1.26 | 0.636 | -1.93 | 0.256 | -1.56 | 0.226 | 1.69  | 0.257 | -0.76 |
| 1446382_at   | ---                | 0 day neonate cerebellum cDNA, RIKEN full-length enriched library, clone:C2300 | -1.86 | 0.32  | -1.48 | 0.209 | -1.35 | 0.06  | 1     | 0.996 | -0.92 |
| 1458102_at   | Plxna2             | Plexin A2                                                                      | -1.1  | 0.62  | -1.68 | 0.231 | -2.24 | 0.002 | 1.93  | 0.098 | -0.77 |
| 1421202_at   | Chrna4             | cholinergic receptor, nicotinic, alpha polypeptide 4                           | -1.16 | 0.765 | -1.71 | 0.333 | -1.97 | 0.276 | 2.09  | 0.055 | -0.69 |
| 1439627_at   | Zic1               | zinc finger protein of the cerebellum 1                                        | -1.2  | 0.718 | -1.68 | 0.56  | -1.9  | 0.305 | 1.22  | 0.729 | -0.89 |
| 1423012_at   | Syt7               | synaptotagmin VII                                                              | -3.29 | 0.029 | -1.28 | 0.507 | -1.15 | 0.804 | 1.08  | 0.414 | -1.16 |
| 1441527_at   | 4930558J18Rik      | RIKEN cDNA 4930558J18 gene                                                     | -1.25 | 0.603 | -1.73 | 0.379 | -1.73 | 0.355 | 1.71  | 0.065 | -0.75 |
| 1456239_at   | Fgf17              | fibroblast growth factor 17                                                    | -2.45 | 0.507 | 1.05  | 0.776 | -1.99 | 0.081 | -2.12 | 0.449 | -1.38 |
| 1418297_at   | Dpysl4             | dihydropyrimidinase-like 4                                                     | -1.75 | 0.417 | -1.44 | 0.348 | -1.44 | 0.499 | 1.16  | 0.405 | -0.87 |
| 1458732_at   | ---                | ---                                                                            | -2.73 | 0.331 | 1.02  | 0.975 | -1.75 | 0.127 | -1.55 | 0.358 | -1.25 |
| 1425564_at   | Rest               | RE1-silencing transcription factor                                             | -1.33 | 0.389 | -2.31 | 0.256 | -1.3  | 0.498 | 1.18  | 0.718 | -0.94 |
| 1432362_at   | Cenpp              | centromere protein P                                                           | -1.38 | 0.404 | -1.96 | 0.119 | -1.39 | 0.444 | 2.48  | 0.299 | -0.56 |
| 1432340_at   | 1700121N20Rik      | RIKEN cDNA 1700121N20 gene                                                     | -1.86 | 0.54  | -1.67 | 0.55  | -1.21 | 0.417 | 1.16  | 0.191 | -0.9  |
| 1458046_at   | ---                | 0 day neonate kidney cDNA, RIKEN full-length enriched library, clone:D630027M  | -1.05 | 0.819 | -2.1  | 0.033 | -1.88 | 0.005 | 1.53  | 0.073 | -0.87 |
| 1421806_at   | Defb3              | defensin beta 3                                                                | -1.16 | 0.6   | -3.55 | 0.132 | -1.22 | 0.707 | 1.24  | 0.696 | -1.18 |
| 1439728_at   | D330027H18Rik      | RIKEN cDNA D330027H18 gene                                                     | -2.24 | 0.116 | -1.88 | 0.207 | -1.02 | 0.892 | 1.1   | 0.746 | -1.01 |
| 1435963_at   | ---                | ---                                                                            | -1.74 | 0.358 | -2.19 | 0.065 | -1.08 | 0.733 | 1.27  | 0.266 | -0.93 |
| 1425541_at   | Ddx27              | DEAD (Asp-Glu-Ala-Asp) box polypeptide 27                                      | -2.26 | 0.339 | -1.17 | 0.5   | -1.5  | 0.125 | 2.48  | 0.105 | -0.61 |
| 1440960_at   | ---                | 3 days neonate thymus cDNA, RIKEN full-length enriched library, clone:A630060  | -2.74 | 0.464 | -2.96 | 0.256 | 1.26  | 0.634 | -2.22 | 0.405 | -1.66 |
| 1441125_at   | Setd5              | SET domain containing 5                                                        | -1.65 | 0.525 | -2.93 | 0.045 | 1.02  | 0.981 | -2.03 | 0.559 | -1.4  |
| 1444265_at   | ---                | ---                                                                            | -1.43 | 0.51  | -7.62 | 0     | 1.13  | 0.276 | -1.65 | 0.486 | -2.39 |
| 1431585_at   | 1700034P13Rik      | RIKEN cDNA 1700034P13 gene                                                     | -1.53 | 0.267 | -2.13 | 0.005 | -1.19 | 0.714 | 1.31  | 0.514 | -0.88 |
| 1420268_x_at | Npm1               | Nucleophosmin 1                                                                | -1.1  | 0.86  | -1.36 | 0.599 | -3.18 | 0.006 | 1.18  | 0.658 | -1.11 |
| 1455272_at   | Grm5               | glutamate receptor, metabotropic 5                                             | -2.07 | 0.426 | -2.56 | 0.318 | 1.09  | 0.807 | -1.06 | 0.819 | -1.15 |
| 1421382_at   | Prlr               | prolactin receptor                                                             | -1.62 | 0.017 | -1.1  | 0.481 | -2.29 | 0.233 | 1.13  | 0.701 | -0.97 |
| 1460459_at   | Paqr5              | progesterone and adipoQ receptor family member V                               | 1.02  | 0.954 | -2.59 | 0.172 | -1.77 | 0.208 | -2.51 | 0.011 | -1.47 |
| 1432277_at   | 4930565D16Rik      | RIKEN cDNA 4930565D16 gene                                                     | -1.87 | 0.021 | -1.24 | 0.634 | -1.6  | 0.383 | 1.22  | 0.439 | -0.87 |
| 1459562_at   | ---                | ---                                                                            | -1.12 | 0.779 | -1.83 | 0.095 | -1.9  | 0.047 | 1.29  | 0.396 | -0.89 |
| 1423477_at   | Zic1               | zinc finger protein of the cerebellum 1                                        | -4.35 | 0.029 | 1.03  | 0.972 | -1.41 | 0.552 | -2.83 | 0.259 | -1.89 |
| 1440100_at   | 4930527D15Rik      | RIKEN cDNA 4930527D15 gene                                                     | -1.42 | 0.644 | -1.8  | 0.509 | -1.41 | 0.571 | 1.17  | 0.755 | -0.87 |
| 1438189_s_at | Epb4.9             | erythrocyte protein band 4.9                                                   | -1.01 | 0.994 | -1.75 | 0.119 | -2.51 | 0.228 | 8.82  | 0.263 | 0.89  |
| 1449249_at   | Pcdh7              | protocadherin 7                                                                | -1.8  | 0.056 | -1.54 | 0.466 | -1.32 | 0.422 | 2.1   | 0.074 | -0.64 |
| 1447702_x_at | Igsl1              | immunoglobulin superfamily, member 1                                           | -1.5  | 0.535 | -1.62 | 0.436 | -1.47 | 0.178 | 1.54  | 0.408 | -0.76 |
| 1429833_at   | Ly6g6e             | lymphocyte antigen 6 complex, locus G6E                                        | -1.88 | 0.218 | -1.3  | 0.473 | -1.49 | 0.145 | 1.08  | 0.708 | -0.9  |
| 1424941_at   | BC016579           | cDNA sequence, BC016579                                                        | -1.14 | 0.733 | -2.4  | 0.212 | -1.48 | 0.476 | 3.35  | 0.027 | -0.42 |
| 1459181_at   | ---                | PREDICTED: Mus musculus similar to Tubulin alpha-1 chain (LOC629601), mRNA     | -1.46 | 0.625 | -1.29 | 0.635 | -1.96 | 0.08  | 2.04  | 0.284 | -0.67 |
| 1433418_at   | ---                | ---                                                                            | -1.54 | 0.461 | -1.63 | 0.304 | -1.41 | 0.308 | 1     | 1     | -0.9  |
| 1426189_at   | Dusp15             | dual specificity phosphatase-like 15                                           | -1.06 | 0.512 | -2.74 | 0.125 | -1.52 | 0.187 | 1.85  | 0.378 | -0.87 |
| 1454150_at   | 4930453O03Rik      | RIKEN cDNA 4930453O03 gene                                                     | -1.7  | 0.22  | -1.6  | 0.423 | -1.31 | 0.154 | 1.09  | 0.82  | -0.88 |
| 1444854_at   | ---                | PREDICTED: Mus musculus similar to gonadotropin inducible ovarian transcript   | -1.44 | 0.265 | -2.07 | 0.146 | -1.26 | 0.19  | 1.56  | 0.31  | -0.8  |
| 1444968_at   | ---                | ---                                                                            | -1.45 | 0.623 | -2.34 | 0.324 | -1.17 | 0.581 | 1.12  | 0.673 | -0.96 |
| 1430712_at   | Arhgap24           | Rho GTPase activating protein 24                                               | -1.33 | 0.464 | -2.34 | 0.092 | -1.26 | 0.316 | 1.07  | 0.775 | -0.97 |
| 1432063_at   | 4833427F10Rik      | RIKEN cDNA 4833427F10 gene                                                     | -1.99 | 0.08  | -1.16 | 0.747 | -1.65 | 0.378 | 2.01  | 0.194 | -0.7  |
| 1439172_at   | Atp13a5            | ATPase type 13A5                                                               | -2.62 | 0.255 | -1.41 | 0.604 | -1.14 | 0.705 | 1.41  | 0.462 | -0.94 |
| 1418065_at   | Rag2               | recombination activating gene 2                                                | -1.19 | 0.199 | -1.63 | 0.359 | -1.92 | 0.247 | 1.1   | 0.685 | -0.91 |
| 1432961_at   | 2610024D14Rik      | RIKEN cDNA 2610024D14 gene                                                     | -1.84 | 0.256 | -1.51 | 0.4   | -1.3  | 0.443 | 1.32  | 0.45  | -0.83 |
| 1438357_at   | Pfdn5 /// LOC43486 | prefoldin 5 /// prefoldin 5 pseudogene                                         | -2.32 | 0.004 | 1.1   | 0.857 | -2.26 | 0.141 | -1.48 | 0.33  | -1.24 |
| 1433274_at   | 2610200G18Rik      | RIKEN cDNA 2610200G18 gene                                                     | -1.37 | 0.597 | -2.15 | 0.038 | -1.28 | 0.741 | 2.62  | 0.225 | -0.55 |
| 1451900_at   | Mfn2               | mitofusin 2                                                                    | -1.37 | 0.243 | -1.74 | 0.283 | -1.49 | 0.12  | 1.14  | 0.727 | -0.86 |
| 1440108_at   | Foxp2              | forkhead box P2                                                                | -1.38 | 0.495 | -1.6  | 0.027 | -1.59 | 0.008 | 1.35  | 0.361 | -0.81 |
| 1438307_at   | Hmgb2              | High mobility group box 2                                                      | -1.91 | 0.177 | -1.39 | 0.595 | -1.36 | 0.201 | 2.48  | 0.249 | -0.55 |
| 1459169_at   | Coro1c             | Coronin, actin binding protein 1C                                              | -1.77 | 0.439 | -1.39 | 0.668 | -1.44 | 0.496 | 1.45  | 0.391 | -0.79 |

|              |                    |                                                                                     |       |       |        |       |       |       |       |       |       |
|--------------|--------------------|-------------------------------------------------------------------------------------|-------|-------|--------|-------|-------|-------|-------|-------|-------|
| 1442443_at   | Rbbp4              | Retinoblastoma binding protein 4                                                    | -1.04 | 0.285 | -1.77  | 0.121 | -2.19 | 0.032 | 1.09  | 0.539 | -0.98 |
| 1432449_at   | 4930564B18Rik      | RIKEN cDNA 4930564B18 gene                                                          | -2.49 | 0.216 | -1.99  | 0.019 | 1.07  | 0.796 | -2.05 | 0.317 | -1.36 |
| 1445179_at   | D10Ertd494e        | DNA segment, Chr 10, ERATO Doi 494, expressed                                       | -1.19 | 0.791 | -1.29  | 0.682 | -2.75 | 0.034 | 1.16  | 0.79  | -1.02 |
| 1446482_at   | Cep63              | centrosomal protein 63                                                              | -1.83 | 0.354 | -1.65  | 0.601 | -1.21 | 0.636 | 1.25  | 0.698 | -0.86 |
| 1444490_at   | ---                | ---                                                                                 | -1.63 | 0.198 | -2.68  | 0.078 | -1.01 | 0.977 | 1.73  | 0.376 | -0.9  |
| 1453542_at   | 2610007B07Rik      | RIKEN cDNA 2610007B07 gene                                                          | -1.36 | 0.479 | -1.56  | 0.225 | -1.65 | 0.074 | 1.78  | 0.008 | -0.7  |
| 1431508_at   | 4930423M02Rik      | RIKEN cDNA 4930423M02 gene                                                          | -1.57 | 0.206 | -2.8   | 0.037 | -1.01 | 0.964 | 1.04  | 0.954 | -1.09 |
| 1447123_at   | ---                | ---                                                                                 | -1.08 | 0.937 | -1.7   | 0.23  | -2.15 | 0.199 | 1.37  | 0.589 | -0.89 |
| 1432018_at   | Ascl2              | achaete-scute complex homolog-like 2 (Drosophila)                                   | -1.5  | 0.226 | -1.63  | 0.4   | -1.43 | 0.306 | 1.15  | 0.698 | -0.85 |
| 1449610_at   | Ep400              | E1A binding protein p400                                                            | -2.62 | 0.055 | -1.4   | 0.357 | -1.13 | 0.798 | 1.18  | 0.455 | -0.99 |
| 1445643_at   | ---                | PREDICTED: Mus musculus similar to spindle assembly associated Sfi1 homolog         | -1.87 | 0.337 | -1.86  | 0.081 | -1.1  | 0.479 | 1.17  | 0.543 | -0.92 |
| 1458893_at   | ---                | Transcribed locus                                                                   | -2.2  | 0.022 | -1.94  | 0.122 | 1.01  | 0.977 | -1.76 | 0.545 | -1.22 |
| 1439437_x_at | Cpe /// LOC677374  | carboxypeptidase E /// similar to carboxypeptidase E                                | -1.99 | 0.237 | 1.01   | 0.982 | -2.14 | 0     | -1.86 | 0.4   | -1.24 |
| 1447921_at   | ---                | Transcribed locus                                                                   | -1.24 | 0.782 | -3.34  | 0.173 | -1.14 | 0.73  | 1.62  | 0.273 | -1.03 |
| 1435743_at   | Klhl23             | kelch-like 23 (Drosophila)                                                          | -1.48 | 0.199 | -1.23  | 0.661 | -2.03 | 0.005 | 3.11  | 0.185 | -0.41 |
| 1432389_at   | 4933438A12Rik      | RIKEN cDNA 4933438A12 gene                                                          | -1.67 | 0.097 | -2.39  | 0.09  | -1.03 | 0.936 | 1.04  | 0.947 | -1.02 |
| 1438537_at   | ---                | ---                                                                                 | 1.2   | 0.365 | -2.66  | 0.053 | -2.48 | 0.32  | -1.33 | 0.615 | -1.32 |
| 1458561_at   | Neurl              | neuralized-like homolog (Drosophila)                                                | -1.62 | 0.311 | -1.32  | 0.102 | -1.65 | 0.23  | 1.35  | 0.185 | -0.81 |
| 1447429_at   | ---                | Transcribed locus                                                                   | 1.08  | 0.912 | -2.32  | 0.205 | -2.14 | 0.287 | -1.05 | 0.921 | -1.1  |
| 1418507_s_at | Socs2              | suppressor of cytokine signaling 2                                                  | -1.19 | 0.763 | -1.93  | 0.269 | -1.6  | 0.003 | 1.03  | 0.904 | -0.92 |
| 1432936_at   | 5330433J24Rik      | RIKEN cDNA 5330433J24 gene                                                          | -1.16 | 0.387 | -1.44  | 0.133 | -2.33 | 0.231 | 1.1   | 0.721 | -0.96 |
| 1450207_at   | Lifr               | leukemia inhibitory factor receptor                                                 | -1.05 | 0.71  | -5.04  | 0.006 | -1.2  | 0.661 | 1.05  | 0.925 | -1.56 |
| 1459124_at   | Pcsk5              | Proprotein convertase subtilisin/kexin type 5                                       | -2.12 | 0.225 | -1.32  | 0.557 | -1.32 | 0.158 | 1.32  | 0.325 | -0.86 |
| 1456690_at   | ---                | ---                                                                                 | -3.2  | 0.446 | -2.75  | 0.157 | 1.31  | 0.245 | -1.38 | 0.68  | -1.51 |
| 1458058_at   | 7030407E18Rik      | RIKEN cDNA 7030407E18 gene                                                          | -1.27 | 0.619 | -1.86  | 0.011 | -1.51 | 0.016 | 1.09  | 0.394 | -0.89 |
| 1439227_at   | Uhrf1              | ubiquitin-like, containing PHD and RING finger domains, 1                           | -1.82 | 0.084 | -1.79  | 0.078 | -1.14 | 0.196 | 2.01  | 0.308 | -0.68 |
| 1457160_at   | Fjx1               | four jointed box 1 (Drosophila)                                                     | -1.8  | 0.559 | -2.03  | 0.239 | -1.06 | 0.907 | 1.4   | 0.456 | -0.87 |
| 1420228_at   | ---                | ---                                                                                 | -1.26 | 0.033 | -3.61  | 0.035 | -1.09 | 0.777 | 1.27  | 0.486 | -1.17 |
| 1454744_at   | F630043A04Rik      | RIKEN cDNA F630043A04 gene                                                          | -1.95 | 0.194 | -1.89  | 0.371 | -1.06 | 0.866 | 2.38  | 0.198 | -0.63 |
| 1439822_at   | ---                | ---                                                                                 | -1.12 | 0.314 | -1.25  | 0.406 | -3.34 | 0.075 | 1.28  | 0.453 | -1.11 |
| 1438589_at   | Igsl1              | immunoglobulin superfamily, member 1                                                | 1.02  | 0.95  | -1.99  | 0.153 | -2.15 | 0.257 | -1.13 | 0.797 | -1.06 |
| 1438158_at   | ---                | ---                                                                                 | -1.94 | 0.301 | -1.58  | 0.49  | -1.19 | 0.728 | 1.09  | 0.659 | -0.91 |
| 1440535_at   | Uros               | uroporphyrinogen III synthase                                                       | -1.76 | 0.231 | -1.6   | 0.409 | -1.26 | 0.542 | 3.58  | 0.244 | -0.26 |
| 1418425_at   | Sp7                | trans-acting transcription factor 7                                                 | -1.68 | 0.27  | -1.74  | 0.009 | -1.22 | 0.644 | 1.1   | 0.694 | -0.88 |
| 1433146_at   | Cald1              | caldesmon 1                                                                         | -1.28 | 0.455 | -1.79  | 0.059 | -1.53 | 0.08  | 1.03  | 0.942 | -0.89 |
| 1422448_at   | Tff2               | trefoil factor 2 (spasmolytic protein 1)                                            | -1.3  | 0.756 | -2     | 0.205 | -1.39 | 0.337 | 1.13  | 0.575 | -0.89 |
| 1437401_at   | ---                | ---                                                                                 | -1.32 | 0.38  | -1.18  | 0.026 | -2.56 | 0.041 | 1.32  | 0.368 | -0.94 |
| 1431856_a_at | C1qtnf6            | C1q and tumor necrosis factor related protein 6                                     | -2.1  | 0.47  | -1.67  | 0.551 | -1.09 | 0.831 | 1.11  | 0.328 | -0.94 |
| 1423412_at   | BC013481           | cDNA sequence BC013481                                                              | -1.92 | 0.313 | -1.51  | 0.294 | -1.24 | 0.257 | 1.01  | 0.989 | -0.91 |
| 1421458_at   | Zfp112             | zinc finger protein 112                                                             | -1.99 | 0.231 | -2.11  | 0.191 | 1.01  | 0.956 | -1.02 | 0.916 | -1.02 |
| 1438651_a_at | Agtr1              | angiotensin receptor-like 1                                                         | -1.37 | 0.443 | 1.05   | 0.942 | -4.79 | 0.035 | -1.98 | 0.098 | -1.77 |
| 1440843_at   | A230051N06Rik      | RIKEN cDNA A230051N06 gene                                                          | -1.9  | 0.024 | -1.79  | 0.01  | -1.1  | 0.601 | 1.11  | 0.696 | -0.92 |
| 1442963_at   | Zhx3               | zinc fingers and homeoboxes 3                                                       | -1.13 | 0.456 | -1.59  | 0.006 | -2.09 | 0.038 | 1.47  | 0.174 | -0.83 |
| 1427676_a_at | Grik1              | glutamate receptor, ionotropic, kainate 1                                           | -1.32 | 0.714 | -1.94  | 0.148 | -1.38 | 0.595 | 3.05  | 0.002 | -0.4  |
| 1430362_at   | 5730409N24Rik      | RIKEN cDNA 5730409N24 gene                                                          | -1.64 | 0.083 | -1.23  | 0.64  | -1.75 | 0.146 | 1.58  | 0.32  | -0.76 |
| 1444296_a_at | Serpina4-ps1       | serine (or cysteine) peptidase inhibitor, clade A, member 4, pseudogene 1           | 1.39  | 0.56  | -22.47 | 0.142 | -1.77 | 0.019 | -1.07 | 0.9   | -5.98 |
| 1445019_at   | ---                | ---                                                                                 | -1.2  | 0.822 | -1.41  | 0.511 | -2.22 | 0.244 | 1.87  | 0.502 | -0.74 |
| 1446471_at   | ---                | ---                                                                                 | 1.02  | 0.901 | -1.84  | 0.533 | -2.3  | 0.026 | -1.81 | 0.316 | -1.23 |
| 1416623_at   | Thbs3              | thrombospondin 3                                                                    | 1.06  | 0.872 | -1.85  | 0.041 | -2.53 | 0.029 | -1.32 | 0.095 | -1.16 |
| 1458211_at   | Nek1               | NIMA (never in mitosis gene a)-related expressed kinase 1                           | -1.13 | 0.765 | -1.45  | 0.631 | -2.36 | 0.01  | 1.18  | 0.83  | -0.94 |
| 1428208_at   | Bcl7a              | B-cell CLL/lymphoma 7A                                                              | -1.62 | 0.29  | -1.67  | 0.127 | -1.28 | 0.067 | 1.02  | 0.922 | -0.89 |
| 1444654_at   | Trerf1             | Transcriptional regulating factor 1                                                 | -3.31 | 0.024 | -1.18  | 0.728 | -1.18 | 0.66  | 1.09  | 0.806 | -1.14 |
| 1429790_at   | Brunol6 /// LOC669 | bruno-like 6, RNA binding protein (Drosophila) /// similar to bruno-like 6, RNA bin | -2.52 | 0.137 | -1.03  | 0.948 | -1.58 | 0.1   | 1.21  | 0.822 | -0.98 |

|              |                    |                                                                                 |       |       |       |       |       |       |       |       |       |
|--------------|--------------------|---------------------------------------------------------------------------------|-------|-------|-------|-------|-------|-------|-------|-------|-------|
| 1459912_at   | Map4k4             | mitogen-activated protein kinase kinase kinase kinase 4                         | -1.75 | 0.323 | -1.2  | 0.686 | -1.68 | 0.325 | 1.69  | 0.175 | -0.74 |
| 1440415_at   | ---                | 0 day neonate thymus cDNA, RIKEN full-length enriched library, clone:A430095E   | -1.4  | 0.533 | -1.54 | 0.037 | -1.58 | 0.213 | 1.29  | 0.508 | -0.81 |
| 1446588_at   | ---                | ---                                                                             | -4.2  | 0.006 | -1.1  | 0.807 | -1.17 | 0.739 | 1.15  | 0.721 | -1.33 |
| 1422984_at   | Cyln2              | cytoplasmic linker 2                                                            | -1.25 | 0.811 | -2.21 | 0.304 | -1.34 | 0.672 | 1.59  | 0.099 | -0.8  |
| 1417898_a_at | Gzma               | granzyme A                                                                      | -1.81 | 0.521 | 1.09  | 0.749 | -2.78 | 0.054 | -5.15 | 0.032 | -2.16 |
| 1431946_a_at | Apba2bp            | amyloid beta (A4) precursor protein-binding, family A, member 1 binding protein | -1.47 | 0.382 | -2.01 | 0.009 | -1.22 | 0.497 | 1.7   | 0.144 | -0.75 |
| 1446320_at   | 231001016Rik       | RIKEN cDNA 231001016 gene                                                       | -1.95 | 0.249 | -1.69 | 0.163 | -1.12 | 0.455 | 1.05  | 0.893 | -0.93 |
| 1448992_at   | Ina                | interneuron neuronal intermediate filament protein, alpha                       | -1.01 | 0.994 | -1.6  | 0.246 | -2.64 | 0.065 | 4.75  | 0.079 | -0.12 |
| 1444807_at   | ---                | ---                                                                             | -2.11 | 0.035 | -1.24 | 0.594 | -1.39 | 0.499 | 1.57  | 0.403 | -0.79 |
| 1419707_at   | Krtap14            | keratin associated protein 14                                                   | -1.49 | 0.508 | -1.42 | 0.339 | -1.59 | 0.311 | 1.08  | 0.883 | -0.86 |
| 1440468_at   | D630023F18Rik      | RIKEN cDNA D630023F18 gene                                                      | -1.45 | 0.081 | -1.11 | 0.862 | -2.43 | 0.149 | 1.03  | 0.959 | -0.99 |
| 1441103_at   | D12Etd551e         | DNA segment, Chr 12, ERATO Doi 551, expressed                                   | -3.29 | 0.066 | -1.03 | 0.964 | -1.39 | 0.262 | 1.7   | 0.204 | -1    |
| 1441269_at   | Hydin              | Hydrocephalus inducing                                                          | -1.4  | 0.698 | -1.29 | 0.649 | -1.96 | 0.147 | 1.4   | 0.43  | -0.81 |
| 1439889_at   | Scn8a              | sodium channel, voltage-gated, type VIII, alpha                                 | -1.83 | 0.042 | -1.42 | 0.308 | -1.33 | 0.016 | 1.28  | 0.08  | -0.82 |
| 1429886_at   | Zfp294             | zinc finger protein 294                                                         | -2.54 | 0.156 | -1.88 | 0.036 | 1.08  | 0.879 | -1.34 | 0.538 | -1.17 |
| 1450797_a_at | Cbx1               | chromobox homolog 1 (Drosophila HP1 beta)                                       | -1.58 | 0.388 | -1.79 | 0.334 | -1.23 | 0.347 | 1.38  | 0.654 | -0.81 |
| 1444055_at   | Hs3st3b1           | Heparan sulfate (glucosamine) 3-O-sulfotransferase 3B1                          | -1.54 | 0.511 | -1.51 | 0.129 | -1.45 | 0.454 | 1.68  | 0.052 | -0.7  |
| 1441655_at   | Gm884              | gene model 884, (NCBI)                                                          | -2.03 | 0.446 | -1.68 | 0.524 | -1.09 | 0.885 | 1.68  | 0.435 | -0.78 |
| 1456075_at   | Prkd2              | protein kinase D2                                                               | -2    | 0.225 | -1.27 | 0.656 | -1.39 | 0.513 | 1.2   | 0.769 | -0.87 |
| 1445102_at   | B930096M23Rik      | RIKEN cDNA B930096M23 gene                                                      | -3.17 | 0.028 | -1.35 | 0.517 | -1.06 | 0.908 | 1.9   | 0.229 | -0.92 |
| 1438854_x_at | Pitpnm1            | phosphatidylinositol membrane-associated 1                                      | -3.36 | 0.43  | -1.64 | 0.268 | 1.1   | 0.646 | -1    | 0.944 | -1.23 |
| 1459535_at   | Cdh13              | Cadherin 13                                                                     | -1.74 | 0.377 | -1.37 | 0.551 | -1.43 | 0.459 | 1.26  | 0.62  | -0.82 |
| 1432193_at   | 4930412L05Rik      | RIKEN cDNA 4930412L05 gene                                                      | -1.55 | 0.027 | -1.83 | 0.27  | -1.23 | 0.462 | 1.13  | 0.795 | -0.87 |
| 1458700_at   | Lrrc8c             | Leucine rich repeat containing 8 family, member C                               | -1.23 | 0.355 | -1.64 | 0.15  | -1.71 | 0.166 | 1.03  | 0.803 | -0.89 |
| 1415969_s_at | Kap                | kidney androgen regulated protein                                               | -1.27 | 0.008 | -27.5 | 0.13  | 1.19  | 0.864 | -3.01 | 0.211 | -7.65 |
| 1432219_at   | Nol9               | nucleolar protein 9                                                             | -3.39 | 0.06  | -1.76 | 0.28  | 1.14  | 0.788 | -1.25 | 0.569 | -1.31 |
| 1440473_at   | Rap2a              | RAS related protein 2a                                                          | -1.67 | 0.49  | -1.33 | 0.424 | -1.52 | 0.335 | 1.27  | 0.72  | -0.81 |
| 1458570_at   | Aspscr1            | Alveolar soft part sarcoma chromosome region, candidate 1 (human)               | -1.32 | 0.387 | -1.28 | 0.777 | -2.11 | 0.152 | 1.58  | 0.065 | -0.78 |
| 1441735_at   | ---                | ---                                                                             | -2.57 | 0.008 | -1.06 | 0.893 | -1.48 | 0.355 | 1.52  | 0.348 | -0.9  |
| 1424939_at   | Asz1               | ankyrin repeat, SAM and basic leucine zipper domain containing 1                | -1.62 | 0.405 | -1.87 | 0.069 | -1.17 | 0.648 | 1.06  | 0.848 | -0.9  |
| 1448068_at   | Soat1              | sterol O-acyltransferase 1                                                      | -1.41 | 0.271 | -2.07 | 0.166 | -1.23 | 0.416 | 1.75  | 0.017 | -0.74 |
| 1438707_at   | Atp13a4            | ATPase type 13A4                                                                | -1.11 | 0.748 | -1.69 | 0.584 | -1.95 | 0.04  | 1.14  | 0.848 | -0.9  |
| 1431816_at   | Tex9               | testis expressed gene 9                                                         | -3.16 | 0.097 | -1.71 | 0.289 | 1.11  | 0.59  | -1.35 | 0.421 | -1.28 |
| 1441353_at   | 5330421F07Rik      | RIKEN cDNA 5330421F07 gene                                                      | 1.11  | 0.205 | -1.9  | 0.26  | -2.67 | 0.094 | -1.16 | 0.475 | -1.15 |
| 1432346_a_at | Cdh23              | cadherin 23 (otocadherin)                                                       | -5.22 | 0.021 | -1.48 | 0.486 | 1.14  | 0.329 | -1.39 | 0.264 | -1.73 |
| 1437145_s_at | 2310002J15Rik      | RIKEN cDNA 2310002J15 gene                                                      | -3.77 | 0.131 | -1.5  | 0.167 | 1.08  | 0.612 | -1.14 | 0.376 | -1.33 |
| 1444922_at   | ---                | PREDICTED: Mus musculus similar to microtubule-associated protein, RP/EB far    | 1.08  | 0.832 | -2.38 | 0.043 | -1.97 | 0.293 | -2.06 | 0.449 | -1.33 |
| 1432923_at   | 2810404I24Rik      | RIKEN cDNA 2810404I24 gene                                                      | -1.14 | 0.617 | -1.97 | 0.274 | -1.59 | 0.316 | 1.11  | 0.788 | -0.9  |
| 1419379_x_at | Fxyd2              | FXD domain-containing ion transport regulator 2                                 | -1.26 | 0.01  | -4.69 | 0.201 | 1.01  | 0.986 | -1.61 | 0.392 | -1.64 |
| 1419395_at   | Acot12             | acyl-CoA thioesterase 12                                                        | -1.14 | 0.423 | -1.44 | 0.033 | -2.25 | 0.185 | 1.76  | 0.112 | -0.77 |
| 1416689_at   | Tuft1              | tuftelin 1                                                                      | -1.5  | 0.136 | -1.9  | 0.102 | -1.22 | 0.149 | 1.42  | 0.31  | -0.8  |
| 1418475_at   | Scnn1b             | sodium channel, nonvoltage-gated 1 beta                                         | -1.52 | 0.115 | -2.52 | 0.002 | -1.04 | 0.795 | 1.23  | 0.309 | -0.96 |
| 1446084_at   | Nexn               | Nexilin                                                                         | -2.26 | 0.243 | -1.89 | 0.289 | 1.04  | 0.916 | -1.46 | 0.33  | -1.14 |
| 1452851_at   | Tnrc4              | trinucleotide repeat containing 4                                               | -1.46 | 0.063 | -1.74 | 0.291 | -1.33 | 0.349 | 1.3   | 0.427 | -0.81 |
| 1452460_at   | Ankrd26 /// LOC665 | ankyrin repeat domain 26 /// similar to ankyrin repeat domain 26                | -1.56 | 0.305 | -1.51 | 0.055 | -1.41 | 0.238 | 1.43  | 0.025 | -0.76 |
| 1457801_at   | 9930024M15Rik      | RIKEN cDNA 9930024M15 gene                                                      | -1.51 | 0.028 | -1.5  | 0.229 | -1.46 | 0.146 | 1.04  | 0.888 | -0.86 |
| 1444813_at   | Mast2              | Microtubule associated serine/threonine kinase 2                                | -2.38 | 0.017 | -1.4  | 0.63  | -1.13 | 0.677 | 1.29  | 0.619 | -0.91 |
| 1447030_at   | ---                | ---                                                                             | 1.16  | 0.427 | -2.52 | 0.08  | -2.18 | 0.224 | -1.01 | 0.982 | -1.14 |
| 1453930_at   | 1110015M06Rik      | RIKEN cDNA 1110015M06 gene                                                      | -2.98 | 0.01  | -1.5  | 0.139 | 1.01  | 0.939 | -2.11 | 0.206 | -1.39 |
| 1446246_at   | Gm438              | gene model 438, (NCBI)                                                          | -1.31 | 0.66  | -1.86 | 0.018 | -1.39 | 0.099 | 1     | 0.992 | -0.89 |
| 1445936_at   | Skiv2l2            | Superkiller viralicidic activity 2-like 2 (S. cerevisiae)                       | -1.69 | 0.063 | -1.74 | 0.027 | -1.17 | 0.518 | 1.03  | 0.89  | -0.89 |
| 1433673_at   | E130309D14Rik      | RIKEN cDNA E130309D14 gene                                                      | -1.84 | 0.291 | -1.84 | 0.005 | -1.07 | 0.744 | 4.53  | 0.112 | -0.06 |
| 1442556_at   | ---                | ---                                                                             | 1     | 0.976 | -1.67 | 0.185 | -2.42 | 0.024 | -1.11 | 0.342 | -1.05 |

|              |               |                                                                                 |       |       |       |       |       |       |       |       |       |
|--------------|---------------|---------------------------------------------------------------------------------|-------|-------|-------|-------|-------|-------|-------|-------|-------|
| 1419928_at   | Lrig1         | leucine-rich repeats and immunoglobulin-like domains 1                          | -1.36 | 0.288 | -1.9  | 0.075 | -1.33 | 0.423 | 1.02  | 0.933 | -0.89 |
| 1430269_at   | Mybphl        | myosin binding protein H-like                                                   | -5.5  | 0.027 | -1.79 | 0.144 | 1.28  | 0.379 | -1.79 | 0.388 | -1.95 |
| 1441279_at   | C430002E04Rik | RIKEN cDNA C430002E04 gene                                                      | -1.5  | 0.458 | -2.11 | 0.001 | -1.14 | 0.735 | 1.02  | 0.969 | -0.93 |
| 1453706_at   | 2900042A17Rik | RIKEN cDNA 2900042A17 gene                                                      | -1.45 | 0.443 | -1.7  | 0.237 | -1.35 | 0.576 | 1.04  | 0.895 | -0.87 |
| 1454429_at   | 5830462O15Rik | RIKEN cDNA 5830462O15 gene                                                      | -1.45 | 0.346 | -1.68 | 0.161 | -1.36 | 0.289 | 1.16  | 0.706 | -0.83 |
| 1430224_at   | Wfdc3         | WAP four-disulfide core domain 3                                                | -1.7  | 0.145 | -1.95 | 0.045 | -1.09 | 0.784 | 2.26  | 0.183 | -0.62 |
| 1442602_at   | ---           | ---                                                                             | -1.5  | 0.335 | -1.02 | 0.977 | -2.67 | 0     | 1.57  | 0.609 | -0.91 |
| 1440789_at   | Neo1          | neogenin                                                                        | -1.45 | 0.287 | -1.55 | 0.379 | -1.45 | 0.055 | 1.26  | 0.721 | -0.8  |
| 1443053_at   | Ptprd         | Protein tyrosine phosphatase, receptor type, D                                  | -1.09 | 0.769 | -2.79 | 0.026 | -1.34 | 0.354 | 1.76  | 0.216 | -0.87 |
| 1420111_at   | Zfp334        | Zinc finger protein 334                                                         | -1.6  | 0.355 | -1.82 | 0.145 | -1.18 | 0.431 | 1.62  | 0.2   | -0.74 |
| 1445377_at   | Als2cr19      | Amyotrophic lateral sclerosis 2 (juvenile) chromosome region, candidate 19 (hum | -1.49 | 0.086 | -1.24 | 0.344 | -1.82 | 0.001 | 1.27  | 0.016 | -0.82 |
| 1456965_at   | ---           | ---                                                                             | -2.58 | 0.162 | 1.05  | 0.911 | -1.72 | 0.117 | -1.24 | 0.552 | -1.12 |
| 1431762_at   | Htra3         | HtrA serine peptidase 3                                                         | -2.04 | 0.253 | -1.46 | 0.161 | -1.18 | 0.467 | 1.63  | 0.212 | -0.76 |
| 1434428_at   | D330028D13Rik | RIKEN cDNA D330028D13 gene                                                      | -1.41 | 0.382 | -1.57 | 0.026 | -1.47 | 0.021 | 1.01  | 0.975 | -0.86 |
| 1453410_at   | Angptl4       | angiopoietin-like 4                                                             | -1.14 | 0.804 | -1.95 | 0.038 | -1.57 | 0.218 | 1.75  | 0.111 | -0.73 |
| 1455344_at   | Efna3         | ephrin A3                                                                       | -2.09 | 0.219 | -1.99 | 0.082 | 1.04  | 0.834 | -1.94 | 0.291 | -1.25 |
| 1437966_at   | Prnt3         | proline-rich transmembrane protein 3                                            | -2.53 | 0.014 | -1.22 | 0.554 | -1.24 | 0.615 | 1.21  | 0.81  | -0.95 |
| 1443336_at   | Fbxl11        | F-box and leucine-rich repeat protein 11                                        | -2.1  | 0.472 | 1.15  | 0.783 | -2.55 | 0.178 | -1.26 | 0.797 | -1.19 |
| 1428371_at   | 2610507N02Rik | RIKEN cDNA 2610507N02 gene                                                      | -1.41 | 0.224 | -1.45 | 0.014 | -1.59 | 0.146 | 1.2   | 0.261 | -0.81 |
| 1446254_at   | Depdc6        | DEP domain containing 6                                                         | -1.23 | 0.252 | -1.51 | 0.019 | -1.83 | 0.074 | 1.43  | 0.548 | -0.78 |
| 1440652_at   | Ankrd44       | ankyrin repeat domain 44                                                        | 1.06  | 0.942 | -2.79 | 0.256 | -1.66 | 0.151 | -2.05 | 0.228 | -1.36 |
| 1456072_at   | Ppp1r9a       | protein phosphatase 1, regulatory (inhibitor) subunit 9A                        | -1.34 | 0.06  | -1.42 | 0.058 | -1.75 | 0.004 | 1.31  | 0.597 | -0.8  |
| 1441158_at   | Chn2          | Chimerin (chimaerin) 2                                                          | -1.27 | 0.489 | -2.03 | 0.005 | -1.34 | 0.49  | 1.39  | 0.228 | -0.81 |
| 1441078_at   | 1700023F02Rik | RIKEN cDNA 1700023F02 gene                                                      | -3.22 | 0.298 | -1.96 | 0.486 | 1.21  | 0.622 | -1.04 | 0.948 | -1.26 |
| 1454443_at   | 4833411I10Rik | RIKEN cDNA 4833411I10 gene                                                      | -1.98 | 0.062 | -1.17 | 0.763 | -1.51 | 0.01  | 1.41  | 0.345 | -0.81 |
| 1447087_at   | Cgrrf1        | Cell growth regulator with ring finger domain 1                                 | -2.22 | 0.006 | -1.39 | 0.17  | -1.17 | 0.526 | 1.13  | 0.683 | -0.91 |
| 1459581_at   | Trp63         | transformation related protein 63                                               | 1.25  | 0.679 | -2.2  | 0.036 | -3.07 | 0.034 | -1.03 | 0.963 | -1.26 |
| 1421473_at   | Il1a          | interleukin 1 alpha                                                             | -1.84 | 0.023 | -1.48 | 0.465 | -1.24 | 0.464 | 1.14  | 0.639 | -0.85 |
| 1444794_at   | ---           | ---                                                                             | -1.53 | 0.158 | -1.2  | 0.781 | -1.85 | 0.002 | 1.19  | 0.517 | -0.85 |
| 1431534_at   | Paccin3       | protein kinase C and casein kinase substrate in neurons 3                       | -2.45 | 0.11  | -1.03 | 0.952 | -1.53 | 0.442 | 1.31  | 0.582 | -0.93 |
| 1447630_x_at | Gnb5          | guanine nucleotide binding protein, beta 5                                      | -1.18 | 0.402 | -2.36 | 0.121 | -1.32 | 0.224 | 1.88  | 0.05  | -0.74 |
| 1417701_at   | Ppp1r14c      | protein phosphatase 1, regulatory (inhibitor) subunit 14c                       | -1.36 | 0.31  | -1.52 | 0.21  | -1.57 | 0.044 | 1.1   | 0.585 | -0.84 |
| 1433371_at   | 5430427N15Rik | RIKEN cDNA 5430427N15 gene                                                      | -1.18 | 0.495 | -1.38 | 0.66  | -2.18 | 0.279 | 1.05  | 0.945 | -0.92 |
| 1432611_at   | 4932430A15Rik | RIKEN cDNA 4932430A15 gene                                                      | -1.13 | 0.77  | -2.2  | 0.128 | -1.44 | 0.352 | 1.15  | 0.799 | -0.91 |
| 1445830_at   | Ctnnd1        | catenin (cadherin associated protein), delta 1                                  | 1     | 0.991 | -1.95 | 0.074 | -1.94 | 0.09  | -1.07 | 0.901 | -0.99 |
| 1447793_x_at | Rbx1          | Ring-box 1                                                                      | -1.45 | 0.426 | -1.48 | 0.006 | -1.5  | 0.115 | 1.1   | 0.77  | -0.83 |
| 1431172_at   | Orc4l         | origin recognition complex, subunit 4-like (S. cerevisiae)                      | 1.03  | 0.743 | -1.84 | 0.131 | -2.17 | 0.012 | -1.15 | 0.504 | -1.03 |
| 1447642_x_at | Dmwd          | dystrophia myotonica-containing WD repeat motif                                 | -1.38 | 0.64  | -1.41 | 0.595 | -1.67 | 0.234 | 1.5   | 0.206 | -0.74 |
| 1450469_at   | Ddc8          | testis specific protein, Ddc8                                                   | -1.1  | 0.922 | -2.42 | 0.102 | -1.42 | 0.307 | 1.39  | 0.317 | -0.89 |
| 1433326_at   | 4930488N24Rik | RIKEN cDNA 4930488N24 gene                                                      | -3.98 | 0.425 | 1.19  | 0.663 | -1.7  | 0.532 | -2.23 | 0.033 | -1.68 |
| 1442550_at   | 1110033M05Rik | RIKEN cDNA 1110033M05 gene                                                      | -3.07 | 0.255 | -1.33 | 0.649 | -1.04 | 0.895 | 1     | 0.998 | -1.11 |
| 1453801_at   | Them5         | thioesterase superfamily member 5                                               | -1.98 | 0.268 | -1.47 | 0.432 | -1.18 | 0.543 | 1.9   | 0.428 | -0.68 |
| 1429343_at   | 1700012H05Rik | RIKEN cDNA 1700012H05 gene                                                      | -1.36 | 0.457 | -1.49 | 0.121 | -1.59 | 0.126 | 1.1   | 0.712 | -0.84 |
| 1440809_at   | Swap70        | SWA-70 protein                                                                  | -3.03 | 0.229 | -1.48 | 0.383 | 1.03  | 0.959 | -1.44 | 0.392 | -1.23 |
| 1438891_at   | Ctnnd2        | Catenin (cadherin associated protein), delta 2                                  | -1.12 | 0.756 | -2.32 | 0.148 | -1.4  | 0.382 | 1.57  | 0.108 | -0.82 |
| 1420746_at   | Prpi          | prolactin-like protein I                                                        | -2.22 | 0.017 | -1.76 | 0.222 | 1.02  | 0.879 | -1.08 | 0.81  | -1.01 |
| 1432535_at   | 5530400C23Rik | RIKEN cDNA 5530400C23 gene                                                      | -1.14 | 0.533 | -2.19 | 0.28  | -1.44 | 0.104 | 1.6   | 0.453 | -0.79 |
| 1456327_at   | ---           | Transcribed locus                                                               | -2.03 | 0.006 | -1.06 | 0.882 | -1.66 | 0.048 | 1.35  | 0.654 | -0.85 |
| 1458215_at   | Setdb1        | SET domain, bifurcated 1                                                        | -1.23 | 0.752 | -1.65 | 0.194 | -1.61 | 0.025 | 1.32  | 0.038 | -0.79 |
| 1457318_at   | A330008L17Rik | RIKEN cDNA A330008L17 gene                                                      | -2.84 | 0.017 | -1.27 | 0.313 | -1.11 | 0.777 | 1.99  | 0.098 | -0.81 |
| 1457767_at   | Nischarin     | Nischarin                                                                       | -2.38 | 0.204 | -1.51 | 0.348 | -1.05 | 0.92  | 1.34  | 0.366 | -0.9  |
| 1443744_at   | Dcc           | Deleted in colorectal carcinoma                                                 | -1.7  | 0.358 | -1.19 | 0.693 | -1.64 | 0.501 | 1.28  | 0.52  | -0.81 |
| 1443315_at   | ---           | ---                                                                             | -2.8  | 0.216 | -1.68 | 0.162 | 1.08  | 0.443 | -1.05 | 0.691 | -1.11 |

|              |                      |                                                                                        |       |       |        |       |       |       |       |       |       |
|--------------|----------------------|----------------------------------------------------------------------------------------|-------|-------|--------|-------|-------|-------|-------|-------|-------|
| 1442842_at   | Hspbap1              | Hspb associated protein 1                                                              | -1.24 | 0.815 | -1.93  | 0.073 | -1.4  | 0.575 | 1.96  | 0.294 | -0.65 |
| 1417554_at   | Hsd3b4               | hydroxy-delta-5-steroid dehydrogenase, 3 beta- and steroid delta-isomerase 4           | -1.02 | 0.725 | -12.17 | 0.124 | -1.02 | 0.832 | 1.15  | 0.656 | -3.26 |
| 1437967_at   | ---                  | Transcribed locus                                                                      | -1.4  | 0.033 | -1.36  | 0.097 | -1.7  | 0.063 | 1.3   | 0.396 | -0.79 |
| 1458540_at   | ---                  | Transcribed locus                                                                      | -1.75 | 0.252 | -1.39  | 0.583 | -1.34 | 0.242 | 1.15  | 0.801 | -0.83 |
| 1457004_at   | D15Wsu169e           | DNA segment, Chr 15, Wayne State University 169, expressed                             | -2.95 | 0.002 | -1.42  | 0.315 | -1    | 0.994 | 2.3   | 0.012 | -0.77 |
| 1435770_at   | Txndc13              | thioredoxin domain containing 13                                                       | -1.26 | 0.529 | -1.96  | 0.151 | -1.36 | 0.301 | 1.34  | 0.589 | -0.81 |
| 1426758_s_at | Gtl2                 | GTL2, imprinted maternally expressed untranslated mRNA                                 | -1.18 | 0.34  | -2.38  | 0.192 | -1.29 | 0.427 | 1.29  | 0.398 | -0.89 |
| 1446080_at   | Cutl2                | Cut-like 2 (Drosophila)                                                                | -1.54 | 0.299 | -1.55  | 0.388 | -1.34 | 0.329 | 1.02  | 0.889 | -0.85 |
| 1425181_at   | Sgip1                | SH3-domain GRB2-like (endophilin) interacting protein 1                                | -1.22 | 0.725 | -2.38  | 0.104 | -1.25 | 0.395 | 2.04  | 0.045 | -0.7  |
| 1446859_at   | ---                  | ---                                                                                    | -1.51 | 0.407 | -1.5   | 0.439 | -1.4  | 0.039 | 1.74  | 0.109 | -0.67 |
| 1440285_at   | Ppp1r9a              | protein phosphatase 1, regulatory (inhibitor) subunit 9A                               | -1.41 | 0.012 | -1.39  | 0.098 | -1.63 | 0.029 | 1.55  | 0.228 | -0.72 |
| 1458495_at   | Ppp3ca               | Protein phosphatase 3, catalytic subunit, alpha isoform                                | -1.21 | 0.346 | -1.53  | 0.216 | -1.77 | 0.201 | 1     | 0.909 | -0.88 |
| 1430920_at   | 2410075D05Rik        | RIKEN cDNA 2410075D05 gene                                                             | -1.34 | 0.469 | -1.89  | 0.035 | -1.31 | 0.397 | 1.06  | 0.53  | -0.87 |
| 1421549_at   | Pcdhb15              | protocadherin beta 15                                                                  | -1.38 | 0.298 | -1.74  | 0.127 | -1.35 | 0.561 | 2.01  | 0.399 | -0.61 |
| 1423671_at   | Dner                 | delta/notch-like EGF-related receptor                                                  | -1.96 | 0.237 | -1.17  | 0.707 | -1.47 | 0.086 | 1.36  | 0.411 | -0.81 |
| 1442028_at   | AI593864             | expressed sequence AI593864                                                            | -1.96 | 0.177 | -1.37  | 0.101 | -1.24 | 0.679 | 1.03  | 0.943 | -0.89 |
| 1441563_at   | 2410017P07Rik        | RIKEN cDNA 2410017P07 gene                                                             | -1.26 | 0.333 | -1.35  | 0.333 | -1.95 | 0.116 | 1.2   | 0.737 | -0.84 |
| 1443363_at   | A430107O13Rik        | RIKEN cDNA A430107O13 gene                                                             | -1.46 | 0.447 | -1.13  | 0.784 | -2.12 | 0.072 | 1.03  | 0.95  | -0.92 |
| 1436550_at   | Fbxo30               | F-box protein 30                                                                       | -1.14 | 0.511 | -1.59  | 0.07  | -1.87 | 0.014 | 2.65  | 0.264 | -0.49 |
| 1442952_at   | Shrm                 | Shroom                                                                                 | 1.13  | 0.377 | -2.43  | 0.058 | -1.98 | 0.005 | -1.95 | 0.069 | -1.31 |
| 1446316_at   | Lpin2                | Lipin 2                                                                                | -1    | 0.995 | -2.12  | 0.095 | -1.74 | 0.227 | 2.59  | 0.147 | -0.57 |
| 1431867_a_at | 1700007B13Rik        | RIKEN cDNA 1700007B13 gene                                                             | -1.64 | 0.089 | -1.85  | 0.193 | -1.12 | 0.6   | 1.38  | 0.611 | -0.81 |
| 1435012_x_at | Ela3 /// LOC638416   | elastase 3, pancreatic /// similar to elastase 3B, pancreatic                          | -3.75 | 0.043 | -1.36  | 0.583 | 1.04  | 0.909 | -1.9  | 0.644 | -1.49 |
| 1459485_at   | Neo1                 | Neogenin                                                                               | -1.23 | 0.619 | -1.51  | 0.239 | -1.76 | 0.004 | 1.14  | 0.8   | -0.84 |
| 1444384_at   | AI591476             | Expressed sequence AI591476                                                            | -2.42 | 0.353 | 1.02   | 0.977 | -1.63 | 0.005 | -1.26 | 0.322 | -1.07 |
| 1460274_at   | 4921530G04Rik        | RIKEN cDNA 4921530G04 gene                                                             | -1.18 | 0.575 | -1.83  | 0.234 | -1.54 | 0.45  | 1.16  | 0.618 | -0.85 |
| 1437233_x_at | 1110049F12Rik        | RIKEN cDNA 1110049F12 gene                                                             | -1.87 | 0.318 | -1.28  | 0.705 | -1.38 | 0.588 | 1.34  | 0.348 | -0.8  |
| 1438726_at   | Mical2               | microtubule associated monooxygenase, calponin and LIM domain containing 2             | -1.53 | 0.073 | -1.3   | 0.324 | -1.6  | 0.152 | 1.41  | 0.242 | -0.76 |
| 1456249_x_at | Syp                  | Synaptophysin                                                                          | -1.41 | 0.605 | -1.45  | 0.261 | -1.55 | 0.315 | 1.07  | 0.778 | -0.83 |
| 1454618_at   | ---                  | ---                                                                                    | -1.5  | 0.701 | -3.48  | 0.137 | 1.09  | 0.855 | -1.21 | 0.004 | -1.28 |
| 1458520_at   | Hipk2                | Homeodomain interacting protein kinase 2                                               | -1.4  | 0.144 | -1.27  | 0.446 | -1.84 | 0.055 | 1.79  | 0.397 | -0.68 |
| 1453245_at   | 9130024F11Rik        | RIKEN cDNA 9130024F11 gene                                                             | -1.17 | 0.713 | -1.78  | 0.312 | -1.6  | 0.397 | 1.4   | 0.495 | -0.79 |
| 1431231_at   | Hist2h3c1 /// Hist1h | histone 2, H3c1 /// histone 1, H3f /// histone1, H3d /// histone 1, H3b /// histone 1, | -1.32 | 0.567 | -2.2   | 0.035 | -1.2  | 0.381 | 1.76  | 0.037 | -0.74 |
| 1441585_at   | Spg7                 | Spastic paraplegia 7 homolog (human)                                                   | -1.19 | 0.779 | -1.5   | 0.064 | -1.84 | 0.337 | 1.52  | 0.487 | -0.75 |
| 1443938_at   | ---                  | Transcribed locus                                                                      | -1.97 | 0.48  | -1.16  | 0.272 | -1.48 | 0.233 | 1.5   | 0.217 | -0.78 |
| 1430916_at   | Fancd2               | Fanconi anemia, complementation group D2                                               | -3.34 | 0.062 | -1.12  | 0.699 | -1.17 | 0.509 | 1.23  | 0.085 | -1.1  |
| 1447574_s_at | Slc32a1              | Solute carrier family 32 (GABA vesicular transporter), member 1                        | -1.74 | 0.133 | -1.08  | 0.779 | -1.83 | 0.155 | 1.39  | 0.435 | -0.82 |
| 1453957_a_at | Igf2bp3              | insulin-like growth factor 2 mRNA binding protein 3                                    | 1.01  | 0.974 | -1.73  | 0.353 | -2.19 | 0.282 | -1.18 | 0.746 | -1.02 |
| 1436201_x_at | Mbp                  | myelin basic protein                                                                   | -1.28 | 0.28  | -2.7   | 0.147 | -1.11 | 0.841 | 1.81  | 0.522 | -0.82 |
| 1432247_at   | 4633402D09Rik        | RIKEN cDNA 4633402D09 gene                                                             | 1.16  | 0.689 | -2.15  | 0.163 | -2.37 | 0.294 | -1.07 | 0.804 | -1.11 |
| 1429368_at   | Lrig3                | leucine-rich repeats and immunoglobulin-like domains 3                                 | -1.17 | 0.227 | -1.4   | 0.265 | -2.07 | 0.1   | 1.18  | 0.731 | -0.86 |
| 1440648_at   | Coq10a               | Coenzyme Q10 homolog A (yeast)                                                         | -1.51 | 0.393 | -1.56  | 0.279 | -1.34 | 0.438 | 1.04  | 0.78  | -0.84 |
| 1439280_at   | B230396O12Rik        | RIKEN cDNA B230396O12 gene                                                             | -1.83 | 0.463 | -2.03  | 0.22  | 1.01  | 0.961 | -1.19 | 0.418 | -1.01 |
| 1419378_a_at | Fxyd2                | FXYD domain-containing ion transport regulator 2                                       | -1.24 | 0.015 | -4.83  | 0.168 | 1.04  | 0.888 | -1.64 | 0.292 | -1.67 |
| 1438485_at   | E130112L23Rik        | RIKEN cDNA E130112L23 gene                                                             | -1.43 | 0.421 | -1.97  | 0.105 | -1.19 | 0.653 | 1.5   | 0.444 | -0.77 |
| 1424543_at   | Nck1                 | non-catalytic region of tyrosine kinase adaptor protein 1                              | -1.81 | 0.052 | -1.17  | 0.556 | -1.55 | 0.148 | 1.17  | 0.519 | -0.84 |
| 1439929_at   | Mfhas1               | Malignant fibrous histiocytoma amplified sequence 1                                    | -1.25 | 0.082 | -1.32  | 0.037 | -2.01 | 0.042 | 1.2   | 0.478 | -0.85 |
| 1454465_at   | 5830435N06Rik        | RIKEN cDNA 5830435N06 gene                                                             | -1.91 | 0.044 | -2.09  | 0.058 | 1.05  | 0.877 | -1.04 | 0.945 | -1    |
| 1416492_at   | Ccne1                | cyclin E1                                                                              | -2.22 | 0.4   | -1.2   | 0.772 | -1.31 | 0.579 | 4.06  | 0.152 | -0.16 |
| 1438911_at   | 7-Sep                | Septin 7                                                                               | -1.46 | 0.108 | -1.41  | 0.044 | -1.52 | 0.121 | 1.09  | 0.772 | -0.82 |
| 1419986_at   | Ccdc69               | Coiled-coil domain containing 69                                                       | -2.56 | 0.069 | -1.79  | 0.369 | 1.1   | 0.874 | -3.12 | 0.022 | -1.59 |
| 1419510_at   | Es22                 | esterase 22                                                                            | -1.96 | 0.106 | -1.17  | 0.719 | -1.46 | 0.125 | 2.59  | 0.017 | -0.5  |
| 1458707_at   | E430016F16Rik        | RIKEN cDNA E430016F16 gene                                                             | -1.85 | 0.45  | -1.34  | 0.212 | -1.3  | 0.4   | 3.29  | 0.012 | -0.3  |

|              |                        |                                                                                        |       |       |       |       |       |       |       |       |       |
|--------------|------------------------|----------------------------------------------------------------------------------------|-------|-------|-------|-------|-------|-------|-------|-------|-------|
| 1422239_at   | Hoxd13                 | homeo box D13                                                                          | -1.1  | 0.171 | -1.93 | 0.098 | -1.59 | 0.422 | 1.29  | 0.741 | -0.83 |
| 1458841_at   | Nudcd1                 | NudC domain containing 1                                                               | -1.36 | 0.415 | -1.51 | 0.195 | -1.53 | 0.187 | 1     | 0.992 | -0.85 |
| 1425818_at   | ---                    | ---                                                                                    | -1.26 | 0.113 | -1.53 | 0.009 | -1.65 | 0.203 | 1.34  | 0.495 | -0.77 |
| 1431550_at   | 4930488B22Rik          | RIKEN cDNA 4930488B22 gene                                                             | 1.23  | 0.697 | -1.98 | 0.232 | -3.18 | 0.231 | -1.34 | 0.744 | -1.32 |
| 1427223_a_at | AcsM2                  | acyl-CoA synthetase medium-chain family member 2                                       | -1.31 | 0.085 | -1.3  | 0.584 | -1.9  | 0.004 | 1.48  | 0.293 | -0.76 |
| 1425167_a_at | Gngt1                  | guanine nucleotide binding protein (G protein), gamma transducing activity polypeptide | -1.63 | 0.515 | -1.56 | 0.309 | -1.25 | 0.634 | 1.02  | 0.973 | -0.86 |
| 1459401_at   | LOC545191              | Similar to zinc finger protein 616                                                     | -1.8  | 0.378 | -1.24 | 0.759 | -1.44 | 0.231 | 1.06  | 0.85  | -0.86 |
| 1456655_at   | Ext1                   | Exostoses (multiple) 1                                                                 | -1.3  | 0.315 | -1.28 | 0.047 | -1.98 | 0.037 | 1.47  | 0.143 | -0.77 |
| 1433380_at   | 4921509A06Rik          | RIKEN cDNA 4921509A06 gene                                                             | -2.18 | 0.201 | -1.6  | 0.266 | -1.03 | 0.939 | 1.23  | 0.687 | -0.89 |
| 1426273_at   | Lmbr1                  | limb region 1                                                                          | -1.64 | 0.067 | -1.64 | 0.009 | -1.2  | 0.284 | 1.64  | 0.053 | -0.71 |
| 1439291_at   | ---                    | Adult male corpus striatum cDNA, RIKEN full-length enriched library, clone:C0301       | -1.64 | 0.514 | -1.63 | 0.093 | -1.21 | 0.643 | 1.36  | 0.52  | -0.78 |
| 1438374_x_at | App                    | amyloid beta (A4) precursor protein                                                    | -1.45 | 0.286 | -1.99 | 0.363 | -1.16 | 0.516 | 1.7   | 0.298 | -0.73 |
| 1459578_at   | AA407175               | expressed sequence AA407175                                                            | -1.4  | 0.577 | -1.88 | 0.132 | -1.24 | 0.549 | 3.12  | 0.246 | -0.35 |
| 1427023_at   | Phyhlpl                | phytanoyl-CoA hydroxylase interacting protein-like                                     | -1.43 | 0.117 | -4.29 | 0.161 | 1.13  | 0.616 | -4.32 | 0.184 | -2.23 |
| 1428665_at   | ---                    | ---                                                                                    | -3.23 | 0.019 | -1.12 | 0.852 | -1.17 | 0.686 | 1.16  | 0.793 | -1.09 |
| 1423072_at   | 6720475J19Rik ///      | RIKEN cDNA 6720475J19 gene /// similar to putative retrovirus-related gag protein      | -1.5  | 0.346 | -2.57 | 0.005 | 1     | 0.996 | -1.18 | 0.593 | -1.06 |
| 1457114_at   | Tor1b                  | torsin family 1, member B                                                              | -1.25 | 0.838 | -1.41 | 0.628 | -1.82 | 0.106 | 1.17  | 0.72  | -0.83 |
| 1437562_at   | 4932422M17Rik          | RIKEN cDNA 4932422M17 gene                                                             | -2.32 | 0.332 | -1.34 | 0.749 | -1.13 | 0.829 | 2.09  | 0.118 | -0.68 |
| 1430572_at   | 1810042K04Rik          | RIKEN cDNA 1810042K04 gene                                                             | -1.28 | 0.237 | -1.45 | 0.337 | -1.71 | 0.204 | 1.28  | 0.422 | -0.79 |
| 1459511_at   | 3110004L20Rik          | RIKEN cDNA 3110004L20 gene                                                             | -1.31 | 0.155 | -1.42 | 0.23  | -1.68 | 0.009 | 3.97  | 0.135 | -0.11 |
| 1433085_at   | 5930427J20Rik          | RIKEN cDNA 5930427J20 gene                                                             | -5.21 | 0.01  | 1.19  | 0.588 | -1.48 | 0.276 | -1.97 | 0.37  | -1.86 |
| 1425752_at   | BC014805               | cDNA sequence BC014805                                                                 | -4.16 | 0.035 | 1.04  | 0.827 | -1.28 | 0.516 | -1.3  | 0.19  | -1.43 |
| 1447746_at   | Lrch1                  | Leucine-rich repeats and calponin homology (CH) domain containing 1                    | -1.37 | 0.115 | -2.56 | 0.363 | -1.07 | 0.793 | 1.63  | 0.294 | -0.84 |
| 1429406_at   | Slco6c1                | solute carrier organic anion transporter family, member 6c1                            | -1.5  | 0.668 | -1.06 | 0.906 | -2.21 | 0.137 | 1.09  | 0.879 | -0.92 |
| 1437897_at   | Klhl21                 | kelch-like 21 (Drosophila)                                                             | -2.02 | 0.467 | -1.79 | 0.242 | 1.01  | 0.987 | -1.22 | 0.663 | -1.01 |
| 1446216_at   | ---                    | Adult male cecum cDNA, RIKEN full-length enriched library, clone:9130202G13            | -1.78 | 0.2   | -1.24 | 0.616 | -1.44 | 0.465 | 1.24  | 0.688 | -0.81 |
| 1440452_at   | Drp2                   | dystrophin related protein 2                                                           | -1.33 | 0.491 | -1.46 | 0.557 | -1.59 | 0.338 | 1.1   | 0.62  | -0.82 |
| 1460263_at   | Pdcd6ip                | Programmed cell death 6 interacting protein                                            | -1.08 | 0.44  | -2.17 | 0.166 | -1.49 | 0.215 | 1.28  | 0.144 | -0.86 |
| 1436754_at   | A1839735 /// LOC638311 | expressed sequence A1839735 /// hypothetical protein LOC638311                         | -1.89 | 0.001 | -1.48 | 0.149 | -1.17 | 0.606 | 1.91  | 0.172 | -0.66 |
| 1419579_at   | Slc7a12                | solute carrier family 7 (cationic amino acid transporter, y+ system), member 12        | -1.07 | 0.822 | -7.37 | 0.145 | -1.01 | 0.977 | 1.29  | 0.501 | -2.04 |
| 1458180_at   | ---                    | ---                                                                                    | -1.7  | 0.091 | -1.44 | 0.032 | -1.28 | 0.038 | 1.07  | 0.781 | -0.84 |
| 1419496_at   | Slco1a6                | solute carrier organic anion transporter family, member 1a6                            | 1.08  | 0.728 | -5.64 | 0.156 | -1.24 | 0.707 | -1.3  | 0.559 | -1.78 |
| 1430708_a_at | Usp45                  | ubiquitin specific peptidase 45                                                        | -1.32 | 0.324 | -2.27 | 0.144 | -1.16 | 0.721 | 1.08  | 0.761 | -0.92 |
| 1445099_at   | ---                    | Transcribed locus                                                                      | -2.09 | 0.47  | -1.4  | 0.215 | -1.15 | 0.14  | 1.32  | 0.62  | -0.83 |
| 1453477_at   | Zc3h6                  | zinc finger CCCH type containing 6                                                     | -1.8  | 0.099 | -1.45 | 0.484 | -1.22 | 0.638 | 1.12  | 0.79  | -0.84 |
| 1432342_at   | Nmnat3                 | nicotinamide nucleotide adenyltransferase 3                                            | -4.04 | 0.008 | 1.45  | 0.336 | -2.75 | 0.135 | -1.05 | 0.921 | -1.59 |
| 1455709_at   | 4930422I22Rik          | RIKEN cDNA 4930422I22 gene                                                             | -1.19 | 0.689 | -1.45 | 0.528 | -1.88 | 0.202 | 2.71  | 0.104 | -0.45 |
| 1449759_at   | D11Erd326e             | DNA segment, Chr 11, ERATO Doi 326, expressed                                          | -2.17 | 0.207 | -1.36 | 0.662 | -1.16 | 0.846 | 1.42  | 0.457 | -0.82 |
| 1453549_at   | 4930500G05Rik          | RIKEN cDNA 4930500G05 gene                                                             | -1.55 | 0.064 | -1.45 | 0.199 | -1.37 | 0.124 | 1.48  | 0.557 | -0.72 |
| 1439632_at   | ---                    | 12 days embryo spinal ganglion cDNA, RIKEN full-length enriched library, clone:1       | 1.06  | 0.729 | -1.82 | 0.12  | -2.18 | 0.017 | -1.5  | 0.346 | -1.11 |
| 1453478_at   | Pou3f2                 | POU domain, class 3, transcription factor 2                                            | -1.38 | 0.369 | -2.75 | 0.084 | -1.03 | 0.935 | 1.06  | 0.91  | -1.02 |
| 1455501_at   | Slc2a12                | solute carrier family 2 (facilitated glucose transporter), member 12                   | -1.35 | 0.133 | -2.37 | 0.245 | -1.11 | 0.726 | 1.03  | 0.975 | -0.95 |
| 1435506_at   | ---                    | ---                                                                                    | -1.81 | 0.47  | -1.21 | 0.32  | -1.46 | 0.487 | 1.12  | 0.858 | -0.84 |
| 1458765_at   | Rbm10                  | RNA binding motif protein 10                                                           | 1.02  | 0.897 | -1.85 | 0.377 | -1.98 | 0.159 | -1.25 | 0.157 | -1.02 |
| 1451438_s_at | Clec2h                 | C-type lectin domain family 2, member h                                                | -1.13 | 0.767 | -3.04 | 0.032 | -1.17 | 0.647 | 1.23  | 0.301 | -1.03 |
| 1445516_at   | ---                    | ---                                                                                    | -1.16 | 0.549 | -1.81 | 0.077 | -1.53 | 0.306 | 1.25  | 0.663 | -0.81 |
| 1458902_at   | ---                    | ---                                                                                    | -2.33 | 0.136 | -1.17 | 0.54  | -1.28 | 0.382 | 2.2   | 0.237 | -0.64 |
| 1444768_at   | ---                    | Transcribed locus                                                                      | -1.09 | 0.914 | -3.44 | 0.078 | -1.16 | 0.693 | 1.5   | 0.092 | -1.05 |
| 1447399_at   | A330019N05Rik          | RIKEN cDNA A330019N05 gene                                                             | -1.58 | 0.149 | -1.21 | 0.395 | -1.65 | 0.038 | 1.07  | 0.705 | -0.84 |
| 1450278_at   | Tacr3                  | tachykinin receptor 3                                                                  | -1.28 | 0.803 | -1.01 | 0.986 | -3.38 | 0.126 | 1.56  | 0.433 | -1.03 |
| 1449166_at   | S100a14                | S100 calcium binding protein A14                                                       | -3.56 | 0.055 | -1.22 | 0.735 | -1.03 | 0.81  | 1.15  | 0.68  | -1.17 |
| 1449908_at   | Gip                    | gastric inhibitory polypeptide                                                         | -2.14 | 0.042 | 1.16  | 0.685 | -2.27 | 0.309 | -3.35 | 0.182 | -1.65 |
| 1418055_at   | Neurod4                | neurogenic differentiation 4                                                           | -1.28 | 0.721 | -1.36 | 0.521 | -1.81 | 0.228 | 1.31  | 0.396 | -0.79 |

|              |               |                                                                       |       |       |       |       |       |       |       |       |       |
|--------------|---------------|-----------------------------------------------------------------------|-------|-------|-------|-------|-------|-------|-------|-------|-------|
| 1433219_at   | 6720482G16Rik | RIKEN cDNA 6720482G16 gene                                            | -1.42 | 0.576 | -1.42 | 0.205 | -1.52 | 0.348 | 1.9   | 0.291 | -0.61 |
| 1456140_at   | LOC624168     | similar to zinc finger protein of the cerebellum 5                    | -1.61 | 0.159 | -2.62 | 0.273 | 1.07  | 0.91  | -2.51 | 0.323 | -1.42 |
| 1458296_at   | Ext1          | Exostoses (multiple) 1                                                | -1.34 | 0.162 | -1.17 | 0.062 | -2.14 | 0.063 | 1.15  | 0.089 | -0.87 |
| 1431572_at   | 2310015K22Rik | RIKEN cDNA 2310015K22 gene                                            | -4.87 | 0.123 | 1.03  | 0.874 | -1.2  | 0.657 | -1.83 | 0.339 | -1.72 |
| 1458630_at   | Vav3          | Vav 3 oncogene                                                        | 1.15  | 0.861 | -2.11 | 0.242 | -2.27 | 0.127 | -1.72 | 0.22  | -1.24 |
| 1444875_at   | Ppp2ca        | Protein phosphatase 2 (formerly 2A), catalytic subunit, alpha isoform | -1.95 | 0.028 | 1.06  | 0.879 | -2.03 | 0.045 | -1.14 | 0.638 | -1.01 |
| 1421085_at   | Rs1h          | retinoschisis 1 homolog (human)                                       | -7.02 | 0.001 | -1.16 | 0.557 | 1.07  | 0.624 | -1.07 | 0.83  | -2.05 |
| 1441481_at   | Mfap3l        | microfibrillar-associated protein 3-like                              | -1.13 | 0.65  | -3.17 | 0.147 | -1.15 | 0.442 | 1.18  | 0.579 | -1.07 |
| 1427594_at   | Zfp697        | zinc finger protein 697                                               | -1.56 | 0.387 | -1.12 | 0.69  | -1.87 | 0.113 | 1.27  | 0.622 | -0.82 |
| 1440422_at   | Htr1f         | 5-hydroxytryptamine (serotonin) receptor 1F                           | -1.45 | 0.527 | -1.12 | 0.695 | -2.05 | 0.356 | 1.3   | 0.402 | -0.83 |
| 1450995_at   | Folr1         | folate receptor 1 (adult)                                             | -1.07 | 0.572 | -2.35 | 0.303 | -1.4  | 0.296 | 1.59  | 0.251 | -0.81 |
| 1431235_at   | ---           | ---                                                                   | -1.08 | 0.86  | -2.6  | 0.208 | -1.32 | 0.338 | 1.44  | 0.48  | -0.89 |
| 1446333_at   | ---           | ---                                                                   | -2.77 | 0.307 | -1.17 | 0.363 | -1.16 | 0.781 | 1.54  | 0.472 | -0.89 |
| 1442451_at   | Ttc15         | Tetratricopeptide repeat domain 15                                    | 1.02  | 0.925 | -1.71 | 0.166 | -2.16 | 0.011 | -2.22 | 0.048 | -1.27 |
| 1446167_at   | Hipk2         | Homeodomain interacting protein kinase 2                              | -1.28 | 0.044 | -1.22 | 0.308 | -2.12 | 0.014 | 2.44  | 0.247 | -0.55 |
| 1425841_at   | Slc26a7       | solute carrier family 26, member 7                                    | -1.8  | 0.591 | -2.52 | 0.192 | 1.12  | 0.583 | -1.1  | 0.872 | -1.08 |
| 1457561_at   | Itga5         | integrin alpha 5 (fibronectin receptor alpha)                         | -1.41 | 0.399 | -1.71 | 0.21  | -1.29 | 0.25  | 1.18  | 0.691 | -0.81 |
| 1431078_at   | Fbxo3         | F-box only protein 3                                                  | -1.56 | 0.309 | -1.28 | 0.405 | -1.53 | 0.212 | 1.39  | 0.577 | -0.75 |
| 1442439_at   | W91776        | expressed sequence W91776                                             | 1.01  | 0.97  | -2.02 | 0.333 | -1.77 | 0.136 | -1.74 | 0.296 | -1.13 |
| 1424592_a_at | Dnase1        | deoxyribonuclease I                                                   | 1.17  | 0.545 | -2.22 | 0.293 | -2.22 | 0.227 | -1.86 | 0.141 | -1.28 |
| 1432990_at   | 5830495A06Rik | RIKEN cDNA 5830495A06 gene                                            | 1.08  | 0.876 | -3.28 | 0.009 | -1.45 | 0.047 | -1.13 | 0.798 | -1.2  |
| 1453069_at   | Pik3cb        | phosphatidylinositol 3-kinase, catalytic, beta polypeptide            | -1.58 | 0.02  | -1.35 | 0.177 | -1.42 | 0.064 | 1.52  | 0.283 | -0.71 |
| 1446867_at   | ---           | ---                                                                   | 1.01  | 0.99  | -3    | 0.087 | -1.36 | 0.519 | -1.82 | 0.023 | -1.29 |
| 1442815_at   | Pex19         | Peroxisome biogenesis factor 19                                       | -1.94 | 0.092 | -1.26 | 0.303 | -1.3  | 0.381 | 1.01  | 0.974 | -0.87 |
| 1447524_at   | Ap3m2         | adaptor-related protein complex 3, mu 2 subunit                       | -1.35 | 0.642 | -1.32 | 0.586 | -1.74 | 0.078 | 1.78  | 0.183 | -0.66 |
| 1450292_a_at | Hormad1       | HORMA domain containing 1                                             | -1.6  | 0.377 | -2.02 | 0.154 | -1.05 | 0.948 | 1.09  | 0.858 | -0.89 |
| 1443810_at   | Tssk4         | testis-specific serine kinase 4                                       | -1.33 | 0.743 | -1.15 | 0.51  | -2.21 | 0.006 | 1.05  | 0.945 | -0.91 |
| 1429736_at   | 1110003F05Rik | RIKEN cDNA 1110003F05 gene                                            | -1.44 | 0.367 | -1.47 | 0.082 | -1.43 | 0.125 | 1.53  | 0.18  | -0.7  |
| 1424659_at   | Slit2         | slit homolog 2 (Drosophila)                                           | -1.26 | 0.222 | -1.88 | 0.288 | -1.33 | 0.285 | 1.59  | 0.129 | -0.72 |
| 1442450_at   | D2Ert501e     | DNA segment, Chr 2, ERATO Doi 501, expressed                          | -1.78 | 0.515 | -2.23 | 0.314 | 1.07  | 0.876 | -1.9  | 0.062 | -1.21 |
| 1436978_at   | Wnt9a         | wingless-type MMTV integration site 9A                                | -1.56 | 0.217 | -3.14 | 0.056 | 1.12  | 0.753 | -1.32 | 0.701 | -1.23 |
| 1438137_at   | 2810055G22Rik | RIKEN cDNA 2810055G22 gene                                            | -1.64 | 0.376 | -1.67 | 0.155 | -1.15 | 0.723 | 1.1   | 0.843 | -0.84 |
| 1459425_at   | ---           | ---                                                                   | -2.11 | 0.047 | -1.16 | 0.616 | -1.35 | 0.137 | 1.08  | 0.66  | -0.89 |
| 1442875_at   | ---           | ---                                                                   | -1.92 | 0.455 | -2.18 | 0.06  | 1.1   | 0.83  | -1.76 | 0.11  | -1.19 |
| 1432633_at   | 9430063H18Rik | RIKEN cDNA 9430063H18 gene                                            | -1.01 | 0.979 | -1.82 | 0.088 | -1.86 | 0.324 | 2.92  | 0.006 | -0.44 |
| 1435983_at   | 1700019P01Rik | RIKEN cDNA 1700019P01 gene                                            | -2.82 | 0.303 | -2.7  | 0.116 | 1.35  | 0.408 | -1.31 | 0.613 | -1.37 |
| 1451440_at   | Chodl         | chondrolectin                                                         | -1.23 | 0.433 | -1.87 | 0.295 | -1.37 | 0.476 | 2.17  | 0.007 | -0.57 |
| 1453501_at   | Hoxb1         | homeo box B1                                                          | -2.04 | 0.148 | 1.03  | 0.929 | -1.8  | 0.093 | -1.22 | 0.693 | -1.01 |
| 1440000_at   | E330013P04Rik | RIKEN cDNA E330013P04 gene                                            | -2.76 | 0.065 | -1.34 | 0.615 | -1.03 | 0.954 | 1.01  | 0.982 | -1.03 |
| 1458859_at   | ---           | ---                                                                   | -1.06 | 0.906 | -1.38 | 0.525 | -2.41 | 0.068 | 1.94  | 0.457 | -0.73 |
| 1427616_at   | ---           | Mus musculus, clone IMAGE:5362978                                     | -2.32 | 0.138 | -1.32 | 0.681 | -1.12 | 0.805 | 1.22  | 0.337 | -0.89 |
| 1444992_at   | Al120166      | expressed sequence Al120166                                           | -1.24 | 0.058 | -1.49 | 0.434 | -1.67 | 0.019 | 1.65  | 0.075 | -0.69 |
| 1457822_at   | ---           | ---                                                                   | -1.04 | 0.684 | -2.24 | 0.034 | -1.49 | 0.074 | 1.76  | 0.1   | -0.75 |
| 1445793_at   | 1700011I03Rik | RIKEN cDNA 1700011I03 gene                                            | -1.58 | 0.652 | -1.6  | 0.404 | -1.22 | 0.748 | 1.44  | 0.618 | -0.74 |
| 1437191_at   | BC050789      | cDNA sequence BC050789                                                | -1.89 | 0.548 | -3.45 | 0.109 | 1.26  | 0.316 | -2    | 0.101 | -1.52 |
| 1432120_at   | 4921513D11Rik | RIKEN cDNA 4921513D11 gene                                            | -1.4  | 0.187 | -1.8  | 0.226 | -1.23 | 0.152 | 1.6   | 0.221 | -0.71 |
| 1432014_at   | 6530409C15Rik | RIKEN cDNA 6530409C15 gene                                            | -1.49 | 0.476 | -1.41 | 0.566 | -1.42 | 0.181 | 1.23  | 0.338 | -0.77 |
| 1445257_at   | AU022531      | expressed sequence AU022531                                           | -2.45 | 0.062 | -2.69 | 0.139 | 1.3   | 0.73  | -2.73 | 0.21  | -1.64 |
| 1426339_at   | Ak5           | adenylate kinase 5                                                    | 1.14  | 0.601 | -2.44 | 0.025 | -1.87 | 0.123 | -1.66 | 0.309 | -1.21 |
| 1446157_at   | A330019N05Rik | RIKEN cDNA A330019N05 gene                                            | -2.51 | 0.11  | -1.53 | 0.482 | 1.03  | 0.949 | -1.39 | 0.485 | -1.1  |
| 1433283_s_at | ---           | ---                                                                   | -1.29 | 0.56  | -1.22 | 0.653 | -2.05 | 0.116 | 1.76  | 0.249 | -0.7  |
| 1429410_at   | Eny2          | enhancer of yellow 2 homolog (Drosophila)                             | -1.25 | 0.088 | -1.32 | 0.261 | -1.89 | 0.009 | 1.33  | 0.234 | -0.78 |
| 1437739_a_at | 5430432N15Rik | RIKEN cDNA 5430432N15 gene                                            | -1.9  | 0.336 | -1.45 | 0.34  | -1.15 | 0.748 | 1.05  | 0.949 | -0.87 |

|              |                        |                                                                                            |       |       |       |       |       |       |       |       |       |
|--------------|------------------------|--------------------------------------------------------------------------------------------|-------|-------|-------|-------|-------|-------|-------|-------|-------|
| 1459477_at   | Gabarapl2              | Gamma-aminobutyric acid (GABA-A) receptor-associated protein-like 2                        | -4.63 | 0.075 | -1.02 | 0.916 | -1.12 | 0.457 | 1.16  | 0.763 | -1.4  |
| 1447407_at   | Centd3                 | centaurin, delta 3                                                                         | -1.21 | 0.743 | -1.57 | 0.437 | -1.6  | 0.119 | 1.16  | 0.692 | -0.81 |
| 1443583_at   | C030010B13Rik          | RIKEN cDNA C030010B13 gene                                                                 | -1.29 | 0.051 | -1.53 | 0.045 | -1.53 | 0.15  | 1.49  | 0.057 | -0.71 |
| 1442895_at   | ---                    | PREDICTED: Mus musculus similar to zinc finger protein 547 (LOC628043), mRf                | -1.26 | 0.72  | -1.36 | 0.371 | -1.79 | 0.17  | 1.83  | 0.117 | -0.65 |
| 1427638_at   | Zbtb16                 | zinc finger and BTB domain containing 16                                                   | -1.59 | 0.532 | -1.45 | 0.513 | -1.3  | 0.696 | 1.16  | 0.883 | -0.8  |
| 1441161_at   | B230216G23Rik          | RIKEN cDNA B230216G23 gene                                                                 | -1.14 | 0.847 | -2.31 | 0.19  | -1.28 | 0.016 | 1.21  | 0.575 | -0.88 |
| 1444600_at   | Nrbp                   | nuclear receptor binding protein                                                           | -1.95 | 0.07  | -1.16 | 0.833 | -1.4  | 0.542 | 1.09  | 0.738 | -0.86 |
| 1441340_at   | Cep68                  | centrosomal protein 68                                                                     | -1.51 | 0.107 | -4.16 | 0.075 | 1.18  | 0.75  | -1.45 | 0.067 | -1.48 |
| 1433876_at   | Lrrc24                 | leucine rich repeat containing 24                                                          | -1.29 | 0.271 | -1.63 | 0.407 | -1.43 | 0.233 | 1.65  | 0.377 | -0.68 |
| 1431654_at   | 1700112M01Rik          | RIKEN cDNA 1700112M01 gene                                                                 | -2.02 | 0.036 | -1.12 | 0.79  | -1.43 | 0.39  | 1.01  | 0.95  | -0.89 |
| 1422060_at   | Parvb /// LOC67602     | parvin, beta /// similar to parvin, beta                                                   | -2.39 | 0.018 | -1.2  | 0.468 | -1.19 | 0.753 | 2.99  | 0.339 | -0.45 |
| 1442504_at   | D18Etd653e             | DNA segment, Chr 18, ERATO Doi 653, expressed                                              | 1.13  | 0.693 | -2.3  | 0.013 | -1.91 | 0.028 | -1.18 | 0.026 | -1.06 |
| 1422320_x_at | Phxr5                  | per-hexamer repeat gene 5                                                                  | -2.11 | 0.101 | -1.22 | 0.227 | -1.26 | 0.274 | 1.05  | 0.802 | -0.88 |
| 1438345_at   | ---                    | ---                                                                                        | -1.28 | 0.13  | -1.52 | 0.151 | -1.54 | 0.052 | 1.51  | 0.216 | -0.71 |
| 1442954_at   | ---                    | Transcribed locus                                                                          | -1.23 | 0.383 | -1.75 | 0.226 | -1.42 | 0.145 | 1.51  | 0.168 | -0.72 |
| 1431735_at   | 4930469G21Rik          | RIKEN cDNA 4930469G21 gene                                                                 | -2.4  | 0.117 | -1.05 | 0.949 | -1.39 | 0.386 | 1.18  | 0.645 | -0.92 |
| 1453765_at   | A330106J01Rik          | RIKEN cDNA A330106J01 gene                                                                 | -1.01 | 0.994 | -1.59 | 0.412 | -2.15 | 0.077 | 3.39  | 0.038 | -0.34 |
| 1440433_at   | Nmt2                   | N-myristoyltransferase 2                                                                   | -1.15 | 0.872 | -1.69 | 0.318 | -1.59 | 0.075 | 1.11  | 0.633 | -0.83 |
| 1440553_at   | Mecr                   | mitochondrial trans-2-enoyl-CoA reductase                                                  | -1.39 | 0.525 | -2.73 | 0.067 | 1     | 0.984 | -1.99 | 0.238 | -1.28 |
| 1447225_at   | Slc16a5                | solute carrier family 16 (monocarboxylic acid transporters), member 5                      | -1.89 | 0.122 | -2.45 | 0.056 | 1.15  | 0.409 | -1.15 | 0.719 | -1.09 |
| 1429946_at   | 2610301F02Rik          | RIKEN cDNA 2610301F02 gene                                                                 | -1.19 | 0.577 | -1.28 | 0.435 | -2.13 | 0.089 | 1.36  | 0.389 | -0.81 |
| 1443491_at   | Ptprk                  | Protein tyrosine phosphatase, receptor type, K                                             | -1.45 | 0.258 | -1.15 | 0.645 | -1.89 | 0.007 | 1     | 0.988 | -0.87 |
| 1457921_at   | 1810037C20Rik          | RIKEN cDNA 1810037C20 gene                                                                 | -1.36 | 0.107 | -1.73 | 0.301 | -1.29 | 0.526 | 1.13  | 0.366 | -0.81 |
| 1458803_at   | Slfn9 /// LOC67761     | schlafen 9 /// similar to schlafen 9                                                       | -1.55 | 0.457 | -1.47 | 0.271 | -1.31 | 0.542 | 1.23  | 0.209 | -0.77 |
| 1458553_at   | Plat                   | plasminogen activator, tissue                                                              | -1.45 | 0.286 | -1.78 | 0.076 | -1.19 | 0.246 | 1.36  | 0.471 | -0.77 |
| 1457251_x_at | Adcy1                  | Adenylate cyclase 1                                                                        | 1.05  | 0.939 | -4.78 | 0     | -1.21 | 0.712 | -1.14 | 0.843 | -1.52 |
| 1440713_at   | 4933407H18Rik          | RIKEN cDNA 4933407H18 gene                                                                 | -1.06 | 0.928 | -1.74 | 0.337 | -1.76 | 0.432 | 1.25  | 0.728 | -0.82 |
| 1446327_at   | ---                    | ---                                                                                        | -1.04 | 0.884 | -1.25 | 0.429 | -3.08 | 0.003 | 1.48  | 0.088 | -0.97 |
| 1441134_at   | 6820424L24Rik          | RIKEN cDNA 6820424L24 gene                                                                 | -2.27 | 0.101 | -1.4  | 0.612 | -1.07 | 0.85  | 1.46  | 0.301 | -0.82 |
| 1444578_at   | Spop                   | Speckle-type POZ protein                                                                   | -3.91 | 0.049 | 1.2   | 0.498 | -1.57 | 0.371 | -1.36 | 0.024 | -1.41 |
| 1443611_at   | Dnajb4                 | DnaJ (Hsp40) homolog, subfamily B, member 4                                                | -1.5  | 0.196 | -2.02 | 0.077 | -1.08 | 0.805 | 1.74  | 0.087 | -0.72 |
| 1442777_at   | ---                    | Transcribed locus                                                                          | -1.22 | 0.612 | -2.18 | 0.139 | -1.23 | 0.559 | 1.39  | 0.083 | -0.81 |
| 1424260_at   | Slc12a1                | solute carrier family 12, member 1                                                         | -1.06 | 0.583 | -5.43 | 0.185 | -1.03 | 0.945 | 1.3   | 0.43  | -1.56 |
| 1454586_at   | 1500002K03Rik          | RIKEN cDNA 1500002K03 gene                                                                 | -2.21 | 0.253 | -1.94 | 0.126 | 1.12  | 0.777 | -2.14 | 0.461 | -1.29 |
| 1456974_at   | Onecut1                | one cut domain, family member 1                                                            | -1.19 | 0.734 | -2.83 | 0.005 | -1.11 | 0.888 | 1.62  | 0.452 | -0.88 |
| 1441778_at   | Adcyap1                | adenylate cyclase activating polypeptide 1                                                 | -1.26 | 0.646 | -1.68 | 0.159 | -1.43 | 0.399 | 1.55  | 0.067 | -0.7  |
| 1454397_at   | 4632418H02Rik          | RIKEN cDNA 4632418H02 gene                                                                 | 1.01  | 0.901 | -1.78 | 0.067 | -1.94 | 0.015 | -1.41 | 0.022 | -1.03 |
| 1421505_at   | Mixl1                  | Mix1 homeobox-like 1 (Xenopus laevis)                                                      | -2.95 | 0.001 | -2.38 | 0.292 | 1.33  | 0.551 | -3.54 | 0.19  | -1.88 |
| 1416617_at   | Acss1                  | acyl-CoA synthetase short-chain family member 1                                            | -1.58 | 0.028 | -2.02 | 0.324 | -1.04 | 0.372 | 1.15  | 0.489 | -0.87 |
| 1444771_at   | Abtb2                  | ankyrin repeat and BTB (POZ) domain containing 2                                           | 1.06  | 0.819 | -2.57 | 0.02  | -1.56 | 0.289 | -1.01 | 0.99  | -1.02 |
| 1460461_at   | 4921521K07Rik          | RIKEN cDNA 4921521K07 gene                                                                 | -2.29 | 0.152 | -2.6  | 0.016 | 1.27  | 0.642 | -1.86 | 0.088 | -1.37 |
| 1432046_at   | 4930404K06Rik          | RIKEN cDNA 4930404K06 gene                                                                 | 1.24  | 0.404 | -4.32 | 0.005 | -1.61 | 0.353 | -1.52 | 0.291 | -1.55 |
| 1440635_at   | Palld                  | palladin, cytoskeletal associated protein                                                  | -2.7  | 0.117 | -1.32 | 0.54  | -1.04 | 0.934 | 1.91  | 0.304 | -0.79 |
| 1444697_at   | 4732490B19Rik          | RIKEN cDNA 4732490B19 gene                                                                 | -1.56 | 0.483 | -1.29 | 0.636 | -1.48 | 0.385 | 1.53  | 0.508 | -0.7  |
| 1425959_x_at | Klra1 /// Klra12 /// K | killer cell lectin-like receptor, subfamily A, member 1 /// killer cell lectin-like recept | -1.36 | 0.193 | -2.2  | 0.271 | -1.11 | 0.847 | 1.23  | 0.776 | -0.86 |
| 1442409_at   | D9Wsu90e               | DNA segment, Chr 9, Wayne State University 90, expressed                                   | 1     | 1     | -1.78 | 0.531 | -1.88 | 0.03  | -2.53 | 0.014 | -1.3  |
| 1458115_at   | 4930512H18Rik          | RIKEN cDNA 4930512H18 gene                                                                 | -1.42 | 0.542 | -1.87 | 0.476 | -1.17 | 0.564 | 1.16  | 0.789 | -0.83 |
| 1449475_at   | Atp12a                 | ATPase, H+/K+ transporting, nongastric, alpha polypeptide                                  | 1.08  | 0.758 | -1.88 | 0.295 | -2.07 | 0.169 | -2.21 | 0.282 | -1.27 |
| 1442892_at   | Mcc                    | Mutated in colorectal cancers                                                              | -1.91 | 0.351 | -1.33 | 0.385 | -1.22 | 0.45  | 1.2   | 0.766 | -0.82 |
| 1446267_at   | D17Etd657e             | DNA segment, Chr 17, ERATO Doi 657, expressed                                              | 1.05  | 0.961 | -2.3  | 0.418 | -1.63 | 0.083 | -2.55 | 0.408 | -1.36 |
| 1447461_at   | ---                    | ---                                                                                        | -1.49 | 0.675 | -1.43 | 0.541 | -1.38 | 0.402 | 1.23  | 0.765 | -0.77 |
| 1456923_at   | Trpm3                  | transient receptor potential cation channel, subfamily M, member 3                         | -1.45 | 0.05  | -1.66 | 0.161 | -1.24 | 0.671 | 1.8   | 0.457 | -0.64 |
| 1421596_s_at | H28                    | histocompatibility 28                                                                      | -1.41 | 0.47  | -1.22 | 0.427 | -1.78 | 0.192 | 2.8   | 0.304 | -0.4  |

|              |                |                                                                               |       |       |       |       |       |       |       |       |       |
|--------------|----------------|-------------------------------------------------------------------------------|-------|-------|-------|-------|-------|-------|-------|-------|-------|
| 1437823_at   | 2310040A07Rik  | RIKEN cDNA 2310040A07 gene                                                    | -1.04 | 0.94  | -2.63 | 0.198 | -1.33 | 0.367 | 1.31  | 0.207 | -0.92 |
| 1431435_at   | ---            | ---                                                                           | -2.94 | 0.026 | -1.65 | 0.228 | 1.15  | 0.649 | -1.86 | 0.151 | -1.32 |
| 1452905_at   | Gtl2 /// Lphn1 | GTL2, imprinted maternally expressed untranslated mRNA /// latrophilin 1      | -1.15 | 0.521 | -3.42 | 0.028 | -1.07 | 0.657 | 1.39  | 0.239 | -1.06 |
| 1439380_x_at | Gtl2           | GTL2, imprinted maternally expressed untranslated mRNA                        | -1.23 | 0.406 | -2.19 | 0.15  | -1.22 | 0.133 | 1.79  | 0.197 | -0.71 |
| 1444469_at   | 1110059H15Rik  | RIKEN cDNA 1110059H15 gene                                                    | -1.39 | 0.472 | -2.04 | 0.073 | -1.13 | 0.654 | 1.35  | 0.445 | -0.8  |
| 1442735_at   | Oaz2           | Ornithine decarboxylase antizyme 2                                            | -1.07 | 0.225 | -1.42 | 0.699 | -2.18 | 0.062 | 1.03  | 0.961 | -0.91 |
| 1459068_at   | Tmem109        | Transmembrane protein 109                                                     | 1.08  | 0.814 | -2.21 | 0.168 | -1.76 | 0.077 | -1.44 | 0.459 | -1.08 |
| 1449237_at   | Aloxe3         | arachidonate lipoxygenase 3                                                   | -1.55 | 0.281 | -1.37 | 0.141 | -1.38 | 0.219 | 1.02  | 0.893 | -0.82 |
| 1439991_a_at | Pabpn1         | poly(A)binding protein nuclear-like 1                                         | -1.73 | 0.188 | 1.05  | 0.828 | -2.13 | 0.177 | -2.45 | 0.076 | -1.31 |
| 1442498_at   | C78662         | EST C78662                                                                    | -1.64 | 0.141 | -1.12 | 0.752 | -1.68 | 0.194 | 1.18  | 0.366 | -0.81 |
| 1419376_at   | 1110018M03Rik  | RIKEN cDNA 1110018M03 gene                                                    | -1.25 | 0.113 | -1.17 | 0.45  | -2.23 | 0.016 | 1.04  | 0.942 | -0.9  |
| 1433005_at   | 4833446E11Rik  | RIKEN cDNA 4833446E11 gene                                                    | -1.85 | 0.116 | -1.4  | 0.479 | -1.18 | 0.534 | 1.89  | 0.144 | -0.64 |
| 1443428_at   | ---            | ---                                                                           | -1.21 | 0.667 | -1.86 | 0.252 | -1.37 | 0.621 | 1.04  | 0.951 | -0.85 |
| 1439042_at   | Adcyap1r1      | adenylate cyclase activating polypeptide 1 receptor 1                         | -1.62 | 0.58  | -1.59 | 0.278 | -1.18 | 0.772 | 1.07  | 0.408 | -0.83 |
| 1442824_at   | 8030497I03Rik  | RIKEN cDNA 8030497I03 gene                                                    | -1.24 | 0.222 | -1.24 | 0.335 | -2.05 | 0.033 | 1.14  | 0.651 | -0.85 |
| 1440350_at   | ---            | ---                                                                           | -1.77 | 0.219 | -1.4  | 0.475 | -1.22 | 0.575 | 1.05  | 0.885 | -0.83 |
| 1438775_at   | Ppargc1b       | Peroxisome proliferative activated receptor, gamma, coactivator 1 beta        | -1.2  | 0.436 | -2.01 | 0.152 | -1.29 | 0.584 | 2.1   | 0.251 | -0.6  |
| 1441377_at   | Kif6           | kinesin family member 6                                                       | -2.48 | 0.146 | -1.21 | 0.533 | -1.15 | 0.563 | 1.98  | 0.373 | -0.71 |
| 1443803_x_at | Hoxa5          | homeo box A5                                                                  | -1.06 | 0.667 | -2.1  | 0.145 | -1.46 | 0.227 | 1.12  | 0.451 | -0.88 |
| 1422310_at   | Snn            | stannin                                                                       | -1.63 | 0.339 | -1.62 | 0.242 | -1.15 | 0.399 | 1.98  | 0.15  | -0.61 |
| 1445780_at   | ---            | ---                                                                           | 1.23  | 0.29  | -2.1  | 0.24  | -2.52 | 0.178 | -2.07 | 0.311 | -1.36 |
| 1442689_at   | D9Ert278e      | DNA segment, Chr 9, ERATO Doi 278, expressed                                  | -1.58 | 0.239 | -1.94 | 0.36  | -1.05 | 0.839 | 1.4   | 0.125 | -0.79 |
| 1441578_at   | ---            | ---                                                                           | -1.78 | 0.081 | -1.91 | 0.023 | 1.02  | 0.941 | -1.21 | 0.539 | -0.97 |
| 1438438_at   | 2900002H16Rik  | RIKEN cDNA 2900002H16 gene                                                    | -1.65 | 0.123 | -1.23 | 0.303 | -1.46 | 0.047 | 1.09  | 0.684 | -0.81 |
| 1424471_at   | Rapgef3        | Rap guanine nucleotide exchange factor (GEF) 3                                | -1.12 | 0.594 | -2.9  | 0.183 | -1.16 | 0.521 | 1.01  | 0.974 | -1.04 |
| 1446599_at   | ---            | ---                                                                           | -1.17 | 0.484 | -1.27 | 0.606 | -2.15 | 0.029 | 2.99  | 0.012 | -0.4  |
| 1457933_at   | Gm1964         | Gene model 1964, (NCBI)                                                       | -1.1  | 0.829 | -2.16 | 0.126 | -1.37 | 0.074 | 5.35  | 0.198 | 0.18  |
| 1421482_at   | Bsnd           | Bartter syndrome, infantile, with sensorineural deafness (Barttin)            | -1.08 | 0.823 | -1.58 | 0.406 | -1.83 | 0.381 | 1.38  | 0.551 | -0.78 |
| 1443035_at   | ---            | ---                                                                           | -1.72 | 0.082 | -1.15 | 0.731 | -1.54 | 0.208 | 1.18  | 0.724 | -0.81 |
| 1432468_at   | Lcn9           | lipocalin 9                                                                   | -1.88 | 0.286 | -1.81 | 0.39  | 1.02  | 0.975 | -1.03 | 0.945 | -0.93 |
| 1436432_at   | B230343J05Rik  | RIKEN cDNA B230343J05 gene                                                    | -1.5  | 0.574 | -1.38 | 0.494 | -1.41 | 0.144 | 1.03  | 0.974 | -0.81 |
| 1445699_at   | ---            | ---                                                                           | -1.38 | 0.093 | -1.65 | 0.437 | -1.29 | 0.481 | 1.44  | 0.353 | -0.72 |
| 1428601_at   | 1700003E16Rik  | RIKEN cDNA 1700003E16 gene                                                    | -2.27 | 0.232 | -1.6  | 0.042 | 1.04  | 0.903 | -1.95 | 0.333 | -1.19 |
| 1458378_at   | Grin3a         | glutamate receptor ionotropic, NMDA3A                                         | -2.22 | 0.124 | -1.97 | 0.171 | 1.15  | 0.814 | -2.12 | 0.343 | -1.29 |
| 1444533_at   | Cugbp2         | CUG triplet repeat, RNA binding protein 2                                     | 1.13  | 0.607 | -3.96 | 0.182 | -1.38 | 0.391 | -1.15 | 0.867 | -1.34 |
| 1451526_at   | Arhgap12       | Rho GTPase activating protein 12                                              | -1.39 | 0.147 | -1.37 | 0.204 | -1.52 | 0.037 | 1.11  | 0.751 | -0.79 |
| 1421548_at   | Pcdhb2         | protocadherin beta 2                                                          | -1.61 | 0.5   | -2.74 | 0.056 | 1.12  | 0.806 | -1.13 | 0.849 | -1.09 |
| 1457637_at   | Prickle1       | Prickle like 1 (Drosophila)                                                   | -1.01 | 0.884 | -1.63 | 0.239 | -1.99 | 0.059 | 1.04  | 0.89  | -0.89 |
| 1421470_at   | Grpr           | gastrin releasing peptide receptor                                            | -2.53 | 0.401 | -1.73 | 0.132 | 1.14  | 0.86  | -1.16 | 0.782 | -1.07 |
| 1442816_at   | Hs3st3b1       | heparan sulfate (glucosamine) 3-O-sulfotransferase 3B1                        | -1.51 | 0.239 | -1.16 | 0.665 | -1.72 | 0.397 | 1.42  | 0.481 | -0.74 |
| 1442193_at   | A430028G04Rik  | RIKEN cDNA A430028G04 gene                                                    | -2.46 | 0.095 | -1.42 | 0.538 | -1    | 0.998 | 1.87  | 0.392 | -0.75 |
| 1441236_at   | Slc9a3         | solute carrier family 9 (sodium/hydrogen exchanger), member 3                 | -1.26 | 0.265 | -2.1  | 0.082 | -1.19 | 0.559 | 1.08  | 0.558 | -0.87 |
| 1456418_at   | ---            | PREDICTED: Mus musculus similar to Inward rectifier potassium channel 13 (Poi | -1.48 | 0.02  | -1.34 | 0.527 | -1.46 | 0.084 | 1.05  | 0.72  | -0.81 |
| 1431679_at   | 2510042H12Rik  | RIKEN cDNA 2510042H12 gene                                                    | -1.07 | 0.91  | -3.17 | 0.13  | -1.16 | 0.767 | 1.44  | 0.357 | -0.99 |
| 1427528_a_at | Epha7          | Eph receptor A7                                                               | -2.33 | 0.228 | -1.48 | 0.438 | 1.01  | 0.979 | -3.17 | 0.221 | -1.5  |
| 1429938_at   | A930009E05Rik  | RIKEN cDNA A930009E05 gene                                                    | -1.49 | 0.033 | -2.53 | 0.29  | 1.04  | 0.934 | -1.3  | 0.551 | -1.07 |
| 1457758_at   | Eny2           | enhancer of yellow 2 homolog (Drosophila)                                     | -1.14 | 0.876 | -1.41 | 0.362 | -1.9  | 0.084 | 1.06  | 0.758 | -0.85 |
| 1424063_at   | Abpa           | androgen binding protein alpha                                                | -2.33 | 0.028 | -1.15 | 0.695 | -1.24 | 0.333 | 1.2   | 0.464 | -0.88 |
| 1427817_at   | LOC641050      | hypothetical protein LOC641050                                                | -1.05 | 0.957 | -1.88 | 0.295 | -1.6  | 0.203 | 1.42  | 0.565 | -0.78 |
| 1454737_at   | Dusp9          | dual specificity phosphatase 9                                                | -1.27 | 0.503 | -1.55 | 0.06  | -1.47 | 0.016 | 1.05  | 0.703 | -0.81 |
| 1450343_at   | V1rd1          | vomerionasal 1 receptor, D1                                                   | -2    | 0.301 | -1.47 | 0.547 | -1.07 | 0.846 | 1.19  | 0.812 | -0.84 |
| 1447115_at   | C78409         | Expressed sequence C78409                                                     | -1.13 | 0.883 | -2.41 | 0.071 | -1.23 | 0.574 | 1.53  | 0.546 | -0.81 |
| 1421573_at   | 4930533N22Rik  | RIKEN cDNA 4930533N22 gene                                                    | -2    | 0.066 | -1.33 | 0.722 | -1.16 | 0.518 | 1.16  | 0.843 | -0.83 |

|              |                   |                                                                                       |       |       |       |       |       |       |       |       |       |
|--------------|-------------------|---------------------------------------------------------------------------------------|-------|-------|-------|-------|-------|-------|-------|-------|-------|
| 1443726_at   | Smyd1             | SET and MYND domain containing 1                                                      | -1.86 | 0.14  | -1.59 | 0.123 | -1.06 | 0.918 | 1.43  | 0.061 | -0.77 |
| 1421091_at   | Serpina12         | serine (or cysteine) peptidase inhibitor, clade A (alpha-1 antiproteinase, antitrypsi | -1.12 | 0.766 | -2.08 | 0.422 | -1.36 | 0.134 | 3     | 0.121 | -0.39 |
| 1427775_at   | Defb10            | defensin beta 10                                                                      | -1.42 | 0.193 | -2.3  | 0.026 | -1.03 | 0.907 | 1.36  | 0.079 | -0.85 |
| 1449701_at   | D6Ert109e         | DNA segment, Chr 6, ERATO Doi 109, expressed                                          | -1.42 | 0.557 | -1.17 | 0.708 | -1.79 | 0.354 | 1.27  | 0.544 | -0.78 |
| 1444005_at   | ---               | ---                                                                                   | -1.38 | 0.334 | -1.44 | 0.468 | -1.44 | 0.095 | 1.5   | 0.439 | -0.69 |
| 1446323_at   | ---               | ---                                                                                   | -1.37 | 0.227 | -1.6  | 0.191 | -1.32 | 0.16  | 1.31  | 0.253 | -0.74 |
| 1439379_x_at | Prm1              | protamine 1                                                                           | -2.62 | 0.459 | -1.3  | 0.351 | -1.04 | 0.694 | 1.95  | 0.076 | -0.75 |
| 1417641_at   | Galnt15           | UDP-N-acetyl-alpha-D-galactosamine:polypeptide N-acetylglactosaminyltransfe           | -1.34 | 0.562 | -3.4  | 0.235 | 1.07  | 0.817 | -1.59 | 0.337 | -1.31 |
| 1457294_at   | Tmtc3             | Transmembrane and tetratricopeptide repeat containing 3                               | -1.27 | 0.144 | -1.37 | 0.128 | -1.68 | 0.063 | 1.37  | 0.064 | -0.74 |
| 1459443_at   | Kcnq1             | Potassium voltage-gated channel, subfamily Q, member 1                                | -1.3  | 0.21  | -1.16 | 0.633 | -2.07 | 0.06  | 3.37  | 0.006 | -0.29 |
| 1430285_at   | Ppp1r14c          | protein phosphatase 1, regulatory (inhibitor) subunit 14c                             | -1.27 | 0.604 | -1.35 | 0.316 | -1.71 | 0.099 | 2.28  | 0.224 | -0.51 |
| 1441380_at   | 2810439F02Rik     | RIKEN cDNA 2810439F02 gene                                                            | -1.17 | 0.567 | -1.8  | 0.027 | -1.42 | 0.184 | 2.14  | 0.395 | -0.56 |
| 1448393_at   | Cldn7             | claudin 7                                                                             | -1.2  | 0.099 | -2.77 | 0.178 | -1.08 | 0.481 | 1.84  | 0.088 | -0.81 |
| 1447242_at   | Parl              | Presenilin associated, rhomboid-like                                                  | 1     | 0.977 | -1.62 | 0.167 | -2.01 | 0.16  | -1.83 | 0.334 | -1.11 |
| 1439620_at   | Car13             | carbonic anhydrase 13                                                                 | -2.08 | 0.295 | -1.17 | 0.708 | -1.28 | 0.528 | 1.74  | 0.118 | -0.7  |
| 1424596_s_at | Lmcd1             | LIM and cysteine-rich domains 1                                                       | 1.1   | 0.726 | -3.15 | 0.19  | -1.42 | 0.02  | -1.08 | 0.433 | -1.14 |
| 1427436_at   | Six2              | sine oculis-related homeobox 2 homolog (Drosophila)                                   | -1.87 | 0.277 | -1.45 | 0.371 | -1.12 | 0.636 | 1.04  | 0.913 | -0.85 |
| 1435136_at   | Whsc1             | Wolf-Hirschhorn syndrome candidate 1 (human)                                          | -1.24 | 0.468 | -1.48 | 0.13  | -1.58 | 0.011 | 1.93  | 0.227 | -0.59 |
| 1438240_at   | Ccin              | calicin                                                                               | -5    | 0.317 | 1.26  | 0.694 | -1.52 | 0.259 | -1.21 | 0.558 | -1.62 |
| 1459287_at   | Wdfy3             | WD repeat and FYVE domain containing 3                                                | -1.89 | 0.057 | -1.91 | 0.188 | 1.07  | 0.91  | -1.21 | 0.619 | -0.99 |
| 1449892_at   | Lyz11             | lysozyme-like 1                                                                       | -1.17 | 0.048 | -1.6  | 0.582 | -1.57 | 0.406 | 3.66  | 0.242 | -0.17 |
| 1452900_at   | LOC671160         | similar to Proline oxidase, mitochondrial precursor (Proline dehydrogenase)           | -1.83 | 0.149 | -1    | 0.996 | -1.74 | 0.058 | 1.15  | 0.449 | -0.85 |
| 1442259_at   | ---               | ---                                                                                   | -1.42 | 0.478 | -1.27 | 0.701 | -1.59 | 0.038 | 1.14  | 0.787 | -0.79 |
| 1442780_at   | 2610002J02Rik     | RIKEN cDNA 2610002J02 gene                                                            | 1.13  | 0.854 | -2.87 | 0.137 | -1.56 | 0.417 | -1.69 | 0.358 | -1.25 |
| 1433630_at   | Map6d1            | MAP6 domain containing 1                                                              | 1.2   | 0.844 | -3.72 | 0.196 | -1.53 | 0.164 | -1.1  | 0.867 | -1.29 |
| 1446832_at   | ---               | ---                                                                                   | 1.04  | 0.864 | -1.48 | 0.182 | -2.46 | 0.052 | -1.11 | 0.707 | -1    |
| 1433289_at   | 9530078B04Rik     | RIKEN cDNA 9530078B04 gene                                                            | -1.59 | 0.37  | -1.06 | 0.906 | -1.83 | 0.042 | 1.02  | 0.944 | -0.86 |
| 1427356_at   | 2310031A18Rik     | RIKEN cDNA 2310031A18 gene                                                            | -1.29 | 0.544 | -1.62 | 0.156 | -1.38 | 0.343 | 1.26  | 0.778 | -0.76 |
| 1417569_at   | Ncald             | neurocalcin delta                                                                     | -1.31 | 0.372 | -1.36 | 0.093 | -1.61 | 0.15  | 1.05  | 0.794 | -0.81 |
| 1441626_at   | ---               | ---                                                                                   | -1.14 | 0.727 | -2.24 | 0.261 | -1.26 | 0.652 | 1.16  | 0.615 | -0.87 |
| 1442244_at   | Inadl             | InaD-like (Drosophila)                                                                | 1.34  | 0.241 | -3.12 | 0.286 | -2.17 | 0.007 | -2.02 | 0.037 | -1.49 |
| 1438877_at   | Trpm6             | transient receptor potential cation channel, subfamily M, member 6                    | -1.06 | 0.859 | -2.12 | 0.006 | -1.41 | 0.007 | 1.11  | 0.747 | -0.87 |
| 1446643_at   | 5330409N07Rik     | RIKEN cDNA 5330409N07 gene                                                            | -1.75 | 0.585 | -2.56 | 0.01  | 1.16  | 0.827 | -1.26 | 0.66  | -1.1  |
| 1419997_at   | ---               | ---                                                                                   | -1.2  | 0.692 | -2.72 | 0.069 | -1.09 | 0.765 | 1.25  | 0.7   | -0.94 |
| 1435700_at   | Tln2              | talín 2                                                                               | -1.12 | 0.728 | -1.74 | 0.075 | -1.53 | 0.023 | 1.29  | 0.074 | -0.78 |
| 1429906_at   | A930035E12Rik     | RIKEN cDNA A930035E12 gene                                                            | -1.18 | 0.716 | -1.73 | 0.374 | -1.43 | 0.19  | 1.22  | 0.513 | -0.78 |
| 1456568_at   | Gsn               | Gelsolin                                                                              | -2.07 | 0.384 | -1.1  | 0.56  | -1.38 | 0.581 | 1.54  | 0.535 | -0.75 |
| 1451991_at   | Epha7             | Eph receptor A7                                                                       | -1.85 | 0.357 | -1.08 | 0.852 | -1.52 | 0.455 | 1.28  | 0.73  | -0.79 |
| 1425852_at   | A230107C01Rik     | RIKEN cDNA A230107C01 gene                                                            | -1.3  | 0.445 | -2.14 | 0.517 | -1.13 | 0.783 | 1.18  | 0.795 | -0.85 |
| 1445470_at   | LOC235580 /// LOC | similar to alpha 3 type VI collagen isoform 4 precursor /// similar to alpha 3 type V | -1.79 | 0.155 | -1.31 | 0.083 | -1.25 | 0.679 | 1.71  | 0.399 | -0.66 |
| 1446644_at   | Brd3              | Bromodomain containing 3                                                              | -1.34 | 0.206 | -1.3  | 0.44  | -1.64 | 0.175 | 1.06  | 0.715 | -0.81 |
| 1438906_at   | ---               | ---                                                                                   | -1.37 | 0.218 | -1.29 | 0.074 | -1.61 | 0.013 | 1.14  | 0.108 | -0.78 |
| 1436369_at   | 2900076A07Rik     | RIKEN cDNA 2900076A07 gene                                                            | -1.38 | 0.421 | -2.61 | 0.23  | 1.02  | 0.973 | -1.55 | 0.102 | -1.13 |
| 1419230_at   | Krt12             | keratin 12                                                                            | 1.07  | 0.903 | -2.36 | 0.193 | -1.58 | 0.518 | -1.88 | 0.452 | -1.19 |
| 1441365_at   | Foxp2             | forkhead box P2                                                                       | -2.15 | 0.055 | -1.17 | 0.12  | -1.24 | 0.649 | 1.19  | 0.618 | -0.84 |
| 1442897_at   | 2610024E20Rik     | RIKEN cDNA 2610024E20 gene                                                            | -1.3  | 0.694 | -1.5  | 0.371 | -1.45 | 0.324 | 1.4   | 0.412 | -0.71 |
| 1446395_at   | Robo2             | Roundabout homolog 2 (Drosophila)                                                     | -1.21 | 0.467 | -1.74 | 0.068 | -1.39 | 0.354 | 1.28  | 0.701 | -0.76 |
| 1427703_at   | Pafah1b1          | platelet-activating factor acetylhydrolase, isoform 1b, beta1 subunit                 | -1.03 | 0.915 | -1.42 | 0.24  | -2.22 | 0.026 | 1.24  | 0.425 | -0.86 |
| 1431478_at   | 3110035G12Rik     | RIKEN cDNA 3110035G12 gene                                                            | -1.07 | 0.918 | -1.3  | 0.616 | -2.37 | 0.057 | 1.52  | 0.402 | -0.81 |
| 1459883_at   | ---               | Adult male epididymis cDNA, RIKEN full-length enriched library, clone:9230001K1       | 1.01  | 0.948 | -2.58 | 0.164 | -1.37 | 0.379 | -1.02 | 0.913 | -0.99 |
| 1421856_at   | S100a3            | S100 calcium binding protein A3                                                       | 1.36  | 0.6   | -2.76 | 0.205 | -2.48 | 0.036 | -1.32 | 0.387 | -1.3  |
| 1444873_at   | Hip1              | Huntingtin interacting protein 1                                                      | -2.9  | 0.065 | -1.02 | 0.97  | -1.25 | 0.637 | 1.16  | 0.449 | -1    |
| 1428036_at   | ---               | MRNA similar to phosphatidylinositol glycan, class S (cDNA clone MGC:41618 IV         | -1.21 | 0.493 | -1.44 | 0.512 | -1.64 | 0.237 | 1.09  | 0.836 | -0.8  |

|              |                   |                                                                                      |       |       |       |       |       |       |       |       |       |
|--------------|-------------------|--------------------------------------------------------------------------------------|-------|-------|-------|-------|-------|-------|-------|-------|-------|
| 1459293_at   | C030038J10Rik     | RIKEN cDNA C030038J10 gene                                                           | 1.02  | 0.955 | -1.35 | 0.027 | -2.69 | 0.003 | -1.27 | 0.66  | -1.07 |
| 1446848_at   | ---               | ---                                                                                  | 1.28  | 0.662 | -2.6  | 0.023 | -2.16 | 0.033 | -2.28 | 0.095 | -1.44 |
| 1443966_at   | ---               | 3 days neonate thymus cDNA, RIKEN full-length enriched library, clone:A630040        | -1.44 | 0.151 | -1.5  | 0.011 | -1.3  | 0.154 | 1.01  | 0.941 | -0.81 |
| 1430606_at   | 2310020F24Rik     | RIKEN cDNA 2310020F24 gene                                                           | -1.62 | 0.374 | -2.12 | 0.303 | 1.04  | 0.823 | -1.03 | 0.914 | -0.93 |
| 1450567_a_at | Col2a1            | procollagen, type II, alpha 1                                                        | -1.16 | 0.219 | -2.02 | 0.425 | -1.29 | 0.146 | 1.48  | 0.453 | -0.75 |
| 1431979_at   | 4930444M15Rik     | RIKEN cDNA 4930444M15 gene                                                           | -1.61 | 0.679 | -1.19 | 0.833 | -1.51 | 0.36  | 2.17  | 0.21  | -0.53 |
| 1449722_at   | ---               | Transcribed locus                                                                    | -1.22 | 0.19  | -1.69 | 0.085 | -1.4  | 0.145 | 1.79  | 0.011 | -0.63 |
| 1459533_at   | D19Ertd79e        | DNA segment, Chr 19, ERATO Doi 79, expressed                                         | -1.49 | 0.322 | -1    | 0.999 | -2.19 | 0.316 | 1.06  | 0.873 | -0.9  |
| 1443018_at   | Ncam1             | Neural cell adhesion molecule 1                                                      | -1.42 | 0.601 | -1.22 | 0.701 | -1.66 | 0.05  | 1.01  | 0.971 | -0.82 |
| 1443546_at   | Hdlbp             | High density lipoprotein (HDL) binding protein                                       | -1.41 | 0.172 | -1.3  | 0.3   | -1.54 | 0.003 | 1.25  | 0.19  | -0.75 |
| 1458603_at   | ---               | ---                                                                                  | -1.44 | 0.01  | -1.29 | 0.191 | -1.51 | 0.083 | 1.08  | 0.651 | -0.79 |
| 1442560_at   | ---               | Adult male testis cDNA, RIKEN full-length enriched library, clone:4933433O05 pr      | -1.22 | 0.124 | -1.9  | 0.104 | -1.27 | 0.439 | 2.02  | 0.113 | -0.59 |
| 1449601_x_at | ---               | Transcribed locus                                                                    | -1.18 | 0.605 | -1.62 | 0.434 | -1.5  | 0.219 | 1.04  | 0.897 | -0.82 |
| 1439816_at   | LOC433270         | Hypothetical gene supported by AK087915                                              | -1.79 | 0.043 | -1.74 | 0.101 | -1    | 0.984 | 1.43  | 0.334 | -0.78 |
| 1436099_at   | AI836003          | expressed sequence AI836003                                                          | -1.94 | 0.016 | -1.5  | 0.018 | -1.06 | 0.658 | 1.17  | 0.615 | -0.83 |
| 1449167_at   | Epb4.1I4a         | erythrocyte protein band 4.1-like 4a                                                 | -1.38 | 0.199 | -1.78 | 0.472 | -1.19 | 0.251 | 2.09  | 0.08  | -0.56 |
| 1455624_at   | ---               | ---                                                                                  | 1.06  | 0.651 | -2.18 | 0.09  | -1.64 | 0.542 | -1.71 | 0.331 | -1.12 |
| 1419981_at   | Riok3             | RIO kinase 3 (yeast)                                                                 | -1.38 | 0.605 | -1.6  | 0.226 | -1.28 | 0.21  | 1.11  | 0.569 | -0.79 |
| 1444675_at   | AL023051          | expressed sequence AL023051                                                          | -1.09 | 0.626 | -1.24 | 0.613 | -2.46 | 0.047 | 1.52  | 0.273 | -0.82 |
| 1420452_at   | Krtap5-2          | keratin associated protein 5-2                                                       | -2.37 | 0.067 | -1.24 | 0.241 | -1.11 | 0.609 | 2.22  | 0.039 | -0.63 |
| 1458279_at   | Foxo3a            | Forkhead box O3a                                                                     | -1.19 | 0.592 | -1.44 | 0.191 | -1.69 | 0.044 | 1.62  | 0.249 | -0.67 |
| 1459816_x_at | ---               | ---                                                                                  | -2.44 | 0.064 | -1.14 | 0.71  | -1.19 | 0.557 | 1.06  | 0.922 | -0.93 |
| 1457843_at   | Lypd6             | LY6/PLAUR domain containing 6                                                        | -1.32 | 0.395 | -1.3  | 0.592 | -1.65 | 0.403 | 1.07  | 0.874 | -0.8  |
| 1457881_at   | Osbpl6            | oxysterol binding protein-like 6                                                     | -1.1  | 0.313 | -2.65 | 0.197 | -1.18 | 0.252 | 1.01  | 0.956 | -0.98 |
| 1422840_at   | 1700013N18Rik     | RIKEN cDNA 1700013N18 gene                                                           | -2.66 | 0.415 | -1.19 | 0.754 | -1.09 | 0.845 | 1.49  | 0.539 | -0.87 |
| 1422339_at   | Gja3              | gap junction membrane channel protein alpha 3                                        | -1.28 | 0.634 | -1.65 | 0.228 | -1.34 | 0.592 | 1.84  | 0.122 | -0.61 |
| 1442658_at   | Ndufb2            | NADH dehydrogenase (ubiquinone) 1 beta subcomplex, 2                                 | 1.01  | 0.969 | -1.78 | 0.056 | -1.78 | 0.064 | -1.23 | 0.435 | -0.95 |
| 1457441_at   | Ebf1              | early B-cell factor 1                                                                | -2.53 | 0.095 | 1.11  | 0.738 | -1.59 | 0.342 | -2.3  | 0.012 | -1.33 |
| 1450574_at   | Cyp11b2           | cytochrome P450, family 11, subfamily b, polypeptide 2                               | -1.42 | 0.583 | -2.19 | 0.052 | -1.03 | 0.953 | 1.09  | 0.824 | -0.89 |
| 1457520_at   | Grhl2             | Grainyhead-like 2 (Drosophila)                                                       | -1.64 | 0.162 | -1.32 | 0.385 | -1.31 | 0.353 | 1.07  | 0.764 | -0.8  |
| 1456601_x_at | Fxyd2             | FXD domain-containing ion transport regulator 2                                      | -1.09 | 0.251 | -7.07 | 0.163 | 1.08  | 0.857 | -1.62 | 0.42  | -2.18 |
| 1420236_at   | ---               | Transcribed locus                                                                    | -2.56 | 0.47  | 1.03  | 0.887 | -1.4  | 0.609 | -1    | 0.996 | -0.98 |
| 1447937_a_at | 4933409K07Rik /// | RIKEN cDNA 4933409K07 gene ///<br>similar to 4933409K07Rik protein ///<br>similar to | -2.04 | 0.271 | -1.53 | 0.131 | -1.01 | 0.967 | 2.25  | 0.075 | -0.58 |
| 1425449_at   | Ppap2a            | phosphatidic acid phosphatase 2a                                                     | -2.78 | 0.178 | -1.02 | 0.957 | -1.26 | 0.54  | 1.2   | 0.586 | -0.96 |
| 1445441_at   | LOC380907         | similar to RIKEN cDNA 1700129C05                                                     | -2.23 | 0.026 | -1.29 | 0.583 | -1.1  | 0.767 | 1.3   | 0.296 | -0.83 |
| 1422358_at   | Fpr-rs4           | formyl peptide receptor, related sequence 4                                          | -1.42 | 0.095 | -1.03 | 0.88  | -2.19 | 0.006 | 1.11  | 0.422 | -0.88 |
| 1458251_at   | AU022166          | expressed sequence AU022166                                                          | -2.02 | 0.221 | -1.57 | 0.073 | 1     | 0.999 | -1.45 | 0.058 | -1.01 |
| 1434013_at   | Ablim3            | actin binding LIM protein family, member 3                                           | -1.65 | 0.344 | -2.04 | 0.054 | 1.04  | 0.899 | -1.47 | 0.409 | -1.03 |
| 1428358_at   | 1810010M01Rik     | RIKEN cDNA 1810010M01 gene                                                           | -1.13 | 0.184 | -2.14 | 0.024 | -1.27 | 0.453 | 1.91  | 0.074 | -0.66 |
| 1457867_at   | Sgpp2             | sphingosine-1-phosphate phosphatase 2                                                | -1.05 | 0.281 | -2.18 | 0.111 | -1.38 | 0.144 | 2.43  | 0.167 | -0.54 |
| 1456344_at   | Tnc               | Tenascin C                                                                           | -1.18 | 0.337 | -1.06 | 0.867 | -2.9  | 0.299 | 1.06  | 0.88  | -1.02 |
| 1457412_at   | Scn8a             | sodium channel, voltage-gated, type VIII, alpha                                      | 1     | 0.996 | -1.45 | 0.45  | -2.25 | 0.094 | -1.01 | 0.988 | -0.93 |
| 1456491_at   | AI606861          | Expressed sequence AI606861                                                          | -1.98 | 0.101 | -1.47 | 0.334 | -1.05 | 0.304 | 1.1   | 0.757 | -0.85 |
| 1458800_at   | Tnrc6c            | Trinucleotide repeat containing 6C                                                   | 1.1   | 0.729 | -1.89 | 0.15  | -1.97 | 0.056 | -1.06 | 0.896 | -0.95 |
| 1453376_at   | 4921524J06Rik     | RIKEN cDNA 4921524J06 gene                                                           | -1.45 | 0.572 | -3.37 | 0     | 1.15  | 0.775 | -1.86 | 0.473 | -1.38 |
| 1441649_at   | Sesn1             | Sestrin 1                                                                            | 1.08  | 0.724 | -1.75 | 0.035 | -2.06 | 0.007 | -1.21 | 0.386 | -0.99 |
| 1442536_at   | LOC619719         | hypothetical protein LOC619719                                                       | -1.13 | 0.803 | -2.04 | 0.044 | -1.32 | 0.445 | 1.03  | 0.817 | -0.86 |
| 1438248_at   | Pcsk5             | proprotein convertase subtilisin/kexin type 5                                        | -1.17 | 0.595 | -1.45 | 0.233 | -1.69 | 0.004 | 1.15  | 0.739 | -0.79 |
| 1450618_a_at | Sprp2a            | small proline-rich protein 2A                                                        | -1.86 | 0.321 | -1.08 | 0.878 | -1.48 | 0.081 | 1.09  | 0.74  | -0.83 |
| 1435121_at   | Dio3as            | deiodinase, iodothyronine type III, antisense                                        | -1.43 | 0.499 | -1.18 | 0.699 | -1.69 | 0.004 | 1.2   | 0.636 | -0.77 |
| 1439757_s_at | Epha4             | Eph receptor A4                                                                      | -1.58 | 0.635 | -2.02 | 0.379 | 1.01  | 0.981 | -1.17 | 0.736 | -0.94 |
| 1456130_at   | LOC553091         | hypothetical LOC553091                                                               | -1.58 | 0.3   | -1.01 | 0.989 | -1.95 | 0.031 | 1.01  | 0.974 | -0.88 |
| 1449766_at   | Syt6              | synaptotagmin VI                                                                     | -1.2  | 0.282 | -1.85 | 0.252 | -1.31 | 0.129 | 1.59  | 0.157 | -0.69 |

|              |               |                                                                            |       |       |       |       |       |       |       |       |       |
|--------------|---------------|----------------------------------------------------------------------------|-------|-------|-------|-------|-------|-------|-------|-------|-------|
| 1439870_at   | A330008L17Rik | RIKEN cDNA A330008L17 gene                                                 | -3.23 | 0.021 | 1.33  | 0.676 | -1.99 | 0.173 | -1.04 | 0.948 | -1.23 |
| 1457879_at   | A230107O07Rik | RIKEN cDNA A230107O07 gene                                                 | -1.06 | 0.875 | -2.06 | 0.002 | -1.42 | 0.449 | 1.89  | 0.191 | -0.66 |
| 1418979_at   | Akr1c14       | aldo-keto reductase family 1, member C14                                   | -3.56 | 0.021 | -1.45 | 0.149 | 1.17  | 0.602 | -1.22 | 0.826 | -1.27 |
| 1446225_at   | Ssu72         | Ssu72 RNA polymerase II CTD phosphatase homolog (yeast)                    | -1.62 | 0.013 | -2.45 | 0.091 | 1.11  | 0.256 | -1.31 | 0.172 | -1.07 |
| 1457395_at   | 5330421F07Rik | RIKEN cDNA 5330421F07 gene                                                 | -1.49 | 0.101 | -2.17 | 0.067 | 1     | 0.988 | -1.01 | 0.989 | -0.91 |
| 1429809_at   | Tmtc2         | transmembrane and tetratricopeptide repeat containing 2                    | -1.27 | 0.522 | -1.54 | 0.157 | -1.42 | 0.186 | 1.23  | 0.616 | -0.75 |
| 1427513_at   | BC024137      | cDNA sequence BC024137                                                     | -1.35 | 0.52  | -1.93 | 0.025 | -1.13 | 0.622 | 1     | 0.999 | -0.85 |
| 1431729_at   | Spata17       | spermatogenesis associated 17                                              | -1.69 | 0.015 | -1.54 | 0.42  | -1.12 | 0.678 | 1.07  | 0.897 | -0.82 |
| 1442672_at   | 0610040F04Rik | RIKEN cDNA 0610040F04 gene                                                 | -1.7  | 0.329 | -1.87 | 0.22  | 1.01  | 0.972 | -1.42 | 0.49  | -0.99 |
| 1438057_at   | ---           | Transcribed locus                                                          | -2.68 | 0.096 | -1.01 | 0.985 | -1.29 | 0.291 | 1.08  | 0.848 | -0.97 |
| 1447526_at   | D5Ert255e     | DNA segment, Chr 5, ERATO Doi 255, expressed                               | -1.54 | 0.017 | -1.2  | 0.377 | -1.52 | 0.036 | 1.31  | 0.426 | -0.74 |
| 1431241_at   | Chchd3        | coiled-coil-helix-coiled-coil-helix domain containing 3                    | -1.63 | 0.088 | -1.39 | 0.128 | -1.24 | 0.154 | 1.16  | 0.676 | -0.77 |
| 1449547_at   | Asb14         | ankyrin repeat and SOCS box-containing protein 14                          | -2.19 | 0.398 | -1.4  | 0.527 | -1.03 | 0.869 | 1.29  | 0.627 | -0.83 |
| 1432966_at   | 4921507H08Rik | RIKEN cDNA 4921507H08 gene                                                 | -1.05 | 0.922 | -1.11 | 0.879 | -3.45 | 0.014 | 1.1   | 0.681 | -1.13 |
| 1458034_at   | 1200016B10Rik | RIKEN cDNA 1200016B10 gene                                                 | -1.08 | 0.839 | -1.69 | 0.379 | -1.6  | 0.386 | 1.03  | 0.919 | -0.84 |
| 1460098_at   | ---           | ---                                                                        | -1.53 | 0.067 | -1.26 | 0.315 | -1.45 | 0.244 | 1.16  | 0.42  | -0.77 |
| 1438284_at   | Ocrl          | oculocerebrorenal syndrome of Lowe                                         | -1.38 | 0.158 | -1.27 | 0.459 | -1.59 | 0.021 | 1.34  | 0.001 | -0.73 |
| 1421693_a_at | Gpr98         | G protein-coupled receptor 98                                              | -1.43 | 0.254 | 1.02  | 0.955 | -2.38 | 0.164 | -1.26 | 0.768 | -1.01 |
| 1454140_at   | Ncam1         | Neural cell adhesion molecule 1                                            | -1.59 | 0.088 | -1.35 | 0.608 | -1.3  | 0.636 | 1.06  | 0.893 | -0.79 |
| 1432457_at   | 4930448F12Rik | RIKEN cDNA 4930448F12 gene                                                 | -1.79 | 0.549 | -1.58 | 0.433 | -1.05 | 0.233 | 1.08  | 0.863 | -0.84 |
| 1447144_at   | 9130011E15Rik | RIKEN cDNA 9130011E15 gene                                                 | -1.11 | 0.389 | -1.08 | 0.884 | -3.2  | 0.022 | 1.45  | 0.143 | -0.98 |
| 1454530_at   | ---           | ---                                                                        | 1.09  | 0.84  | -2.77 | 0.156 | -1.45 | 0.375 | -1.15 | 0.664 | -1.07 |
| 1437157_at   | Atp1b1        | ATPase, Na+/K+ transporting, beta 1 polypeptide                            | -2.69 | 0.049 | -2.02 | 0.141 | 1.28  | 0.665 | -1.45 | 0.694 | -1.22 |
| 1440747_at   | Cpox          | coproporphyrinogen oxidase                                                 | -1.52 | 0.386 | -1.79 | 0.119 | -1.08 | 0.709 | 5.48  | 0.153 | 0.27  |
| 1458729_at   | Fkbp4         | FK506 binding protein 4                                                    | 1.06  | 0.191 | -2.12 | 0.078 | -1.64 | 0.127 | -1.33 | 0.64  | -1.01 |
| 1447911_at   | Tead1         | TEA domain family member 1                                                 | -1.37 | 0.482 | -1.85 | 0.164 | -1.15 | 0.669 | 1.79  | 0.046 | -0.64 |
| 1419955_at   | Zfand3        | Zinc finger, AN1-type domain 3                                             | -1.23 | 0.818 | -2.25 | 0.428 | -1.13 | 0.815 | 1.54  | 0.201 | -0.77 |
| 1425583_at   | ---           | Mammary gland RCB-0526 Jyg-MC(A) cDNA, RIKEN full-length enriched library, | -1.63 | 0.163 | -1.84 | 0.069 | -1.01 | 0.977 | 1.21  | 0.756 | -0.82 |
| 1455934_at   | Ndufb9        | NADH dehydrogenase (ubiquinone) 1 beta subcomplex, 9                       | -1    | 0.997 | -2.55 | 0.025 | -1.32 | 0.434 | 1.16  | 0.77  | -0.93 |
| 1447094_at   | ---           | ---                                                                        | -1.2  | 0.497 | -1.25 | 0.203 | -1.95 | 0.038 | 1.79  | 0.152 | -0.65 |
| 1440094_at   | BC030870      | cDNA sequence BC030870                                                     | -2.53 | 0.304 | 1.07  | 0.795 | -1.46 | 0.261 | -1.62 | 0.227 | -1.14 |
| 1447906_at   | Ptprg         | Protein tyrosine phosphatase, receptor type, G                             | 1.12  | 0.819 | -1.56 | 0.111 | -2.57 | 0.11  | -1.44 | 0.317 | -1.11 |
| 1459436_at   | Zranb3        | Zinc finger, RAN-binding domain containing 3                               | -1.51 | 0.589 | -1.05 | 0.946 | -1.86 | 0.354 | 1.19  | 0.798 | -0.81 |
| 1440129_at   | Aurka         | Aurora kinase A                                                            | -1.16 | 0.756 | -2.07 | 0.16  | -1.25 | 0.572 | 1.86  | 0.314 | -0.65 |
| 1454564_at   | 4933401J01Rik | RIKEN cDNA 4933401J01 gene                                                 | -1.48 | 0.623 | -1.32 | 0.637 | -1.4  | 0.392 | 1.25  | 0.272 | -0.74 |
| 1457727_at   | LOC544864     | hypothetical protein LOC544864                                             | -1.33 | 0.133 | -2.09 | 0.3   | -1.09 | 0.757 | 1.39  | 0.27  | -0.78 |
| 1431850_at   | 3200001D21Rik | RIKEN cDNA 3200001D21 gene                                                 | -1.67 | 0.359 | 1.07  | 0.857 | -2.1  | 0.099 | -1.99 | 0.064 | -1.17 |
| 1454999_at   | Phf21b        | PHD finger protein 21B                                                     | -2.78 | 0     | -2.55 | 0.393 | 1.4   | 0.505 | -2.02 | 0.44  | -1.49 |
| 1450467_at   | Bsn           | bassoon                                                                    | -1.32 | 0.395 | -1.37 | 0.262 | -1.52 | 0.462 | 1.01  | 0.961 | -0.8  |
| 1443334_at   | D430042O09Rik | RIKEN cDNA D430042O09 gene                                                 | -1.55 | 0.366 | -1.41 | 0.629 | -1.27 | 0.598 | 1.06  | 0.921 | -0.79 |
| 1444641_at   | Adcy3         | Adenylate cyclase 3                                                        | -1.32 | 0.045 | -1.43 | 0.117 | -1.45 | 0.183 | 1.15  | 0.614 | -0.76 |
| 1432733_at   | 4933402E15Rik | RIKEN cDNA 4933402E15 gene                                                 | -3.44 | 0.071 | -1.2  | 0.746 | 1.03  | 0.954 | -1.08 | 0.785 | -1.18 |
| 1446932_at   | ---           | ---                                                                        | -1.17 | 0.739 | -1.2  | 0.687 | -2.17 | 0.036 | 1.9   | 0.146 | -0.66 |
| 1440542_at   | 7420416P09Rik | RIKEN cDNA 7420416P09 gene                                                 | -2.19 | 0.012 | -1.03 | 0.908 | -1.39 | 0.478 | 1.49  | 0.201 | -0.78 |
| 1419387_s_at | Muc13         | mucin 13, epithelial transmembrane                                         | -1.37 | 0.327 | -1.51 | 0.128 | -1.32 | 0.195 | 1.87  | 0.304 | -0.58 |
| 1443511_at   | Rora          | RAR-related orphan receptor alpha                                          | 1.01  | 0.934 | -1.41 | 0.571 | -2.33 | 0.09  | -1.02 | 0.946 | -0.94 |
| 1446478_at   | D130067I03Rik | RIKEN cDNA D130067I03 gene                                                 | 1.03  | 0.952 | -1.97 | 0.357 | -1.63 | 0.494 | -1.11 | 0.703 | -0.92 |
| 1454404_at   | 2610011E03Rik | RIKEN cDNA 2610011E03 gene                                                 | 1.05  | 0.818 | -3.07 | 0.08  | -1.29 | 0.397 | -2.28 | 0.072 | -1.4  |
| 1459697_at   | Thada         | Thyroid adenoma associated                                                 | -2.97 | 0.264 | -1.22 | 0.757 | -1.01 | 0.98  | 1.4   | 0.269 | -0.95 |
| 1443142_at   | Btrc          | Beta-transducin repeat containing protein                                  | -1.51 | 0.053 | -1.54 | 0.148 | -1.2  | 0.101 | 3.99  | 0.196 | -0.06 |
| 1443241_at   | Pus7          | Pseudouridylate synthase 7 homolog (S. cerevisiae)                         | -1.22 | 0.79  | -2.05 | 0.245 | -1.19 | 0.367 | 1.14  | 0.405 | -0.83 |
| 1441390_at   | Spdya         | speedy homolog A (Drosophila)                                              | -2.28 | 0.156 | -1.54 | 0.479 | 1.06  | 0.929 | -1.1  | 0.709 | -0.96 |
| 1430111_a_at | Bcat1         | branched chain aminotransferase 1, cytosolic                               | -1.59 | 0.55  | -1.88 | 0.08  | -1.01 | 0.889 | 1.2   | 0.564 | -0.82 |

|              |                   |                                                                                       |       |       |       |       |       |       |       |       |       |
|--------------|-------------------|---------------------------------------------------------------------------------------|-------|-------|-------|-------|-------|-------|-------|-------|-------|
| 1435094_at   | Kcnj16            | potassium inwardly-rectifying channel, subfamily J, member 16                         | 1.15  | 0.073 | -1.97 | 0.357 | -2.03 | 0.255 | -1.52 | 0.289 | -1.09 |
| 1446473_at   | ---               | ---                                                                                   | -1.21 | 0.063 | -1.42 | 0.441 | -1.6  | 0.27  | 1.03  | 0.821 | -0.8  |
| 1444422_at   | Pcdh19            | protocadherin 19                                                                      | -1.77 | 0.169 | -1.42 | 0.237 | -1.13 | 0.671 | 1.55  | 0.37  | -0.69 |
| 1458074_at   | Rslcan24          | Regulator of sex-limitation candidate 24                                              | -1.42 | 0.251 | -1.32 | 0.363 | -1.45 | 0.418 | 1.15  | 0.809 | -0.76 |
| 1441252_at   | 2010001A14Rik     | RIKEN cDNA 2010001A14 gene                                                            | -1.17 | 0.72  | -1.47 | 0.309 | -1.61 | 0.071 | 1.15  | 0.574 | -0.78 |
| 1436988_at   | 5430433G21Rik     | RIKEN cDNA 5430433G21 gene                                                            | -1.07 | 0.782 | -2.73 | 0.128 | -1.18 | 0.616 | 1.09  | 0.81  | -0.97 |
| 1420055_at   | Slc35c2           | solute carrier family 35, member C2                                                   | -1.11 | 0.526 | -2.08 | 0.086 | -1.29 | 0.159 | 1.6   | 0.229 | -0.72 |
| 1455356_at   | Camsap1           | calmodulin regulated spectrin-associated protein 1                                    | -1.41 | 0.042 | -1.24 | 0.157 | -1.58 | 0.07  | 1.02  | 0.931 | -0.8  |
| 1450549_s_at | Elk4              | ELK4, member of ETS oncogene family                                                   | -1.13 | 0.655 | -2.7  | 0.078 | -1.12 | 0.816 | 2     | 0.154 | -0.74 |
| 1420009_at   | Wwc1              | WW, C2 and coiled-coil domain containing 1                                            | -1.29 | 0.202 | -1.95 | 0.292 | -1.16 | 0.729 | 3.3   | 0.094 | -0.27 |
| 1433387_at   | 2900022M07Rik     | RIKEN cDNA 2900022M07 gene                                                            | -2.04 | 0.424 | 1.11  | 0.627 | -1.81 | 0.06  | -1.01 | 0.984 | -0.94 |
| 1443006_at   | Syn3              | Synapsin III                                                                          | -1.46 | 0.243 | -1.53 | 0.034 | -1.23 | 0.438 | 1.46  | 0.072 | -0.69 |
| 1443983_at   | Sorbs1            | Sorbin and SH3 domain containing 1                                                    | -1.22 | 0.569 | -1.18 | 0.601 | -2.07 | 0.12  | 1.18  | 0.554 | -0.82 |
| 1419965_at   | C79445            | expressed sequence C79445                                                             | -3.12 | 0.29  | 1.06  | 0.842 | -1.3  | 0.662 | -1.13 | 0.65  | -1.12 |
| 1435962_at   | Rps6 /// LOC21473 | ribosomal protein S6 /// similar to 40S ribosomal protein S6 /// similar to 40S ribos | -1.28 | 0.696 | -1.51 | 0.126 | -1.41 | 0.238 | 1.12  | 0.745 | -0.77 |
| 1448724_at   | Cish              | cytokine inducible SH2-containing protein                                             | -1.39 | 0.028 | -1.72 | 0.321 | -1.18 | 0.213 | 2.31  | 0.254 | -0.49 |
| 1457902_at   | ---               | Transcribed locus, moderately similar to XP_576460.1 PREDICTED: similar to hy         | 1.17  | 0.641 | -1.73 | 0.439 | -2.48 | 0.26  | -1.19 | 0.461 | -1.06 |
| 1430169_at   | 1700007K09Rik     | RIKEN cDNA 1700007K09 gene                                                            | -1.45 | 0.495 | -1.21 | 0.463 | -1.57 | 0.176 | 2.28  | 0.16  | -0.49 |
| 1446356_at   | Ppp2r5e           | Protein phosphatase 2, regulatory subunit B (B56), epsilon isoform                    | -1.15 | 0.103 | -1.47 | 0.151 | -1.65 | 0.019 | 1.26  | 0.463 | -0.75 |
| 1432677_at   | Gbf1              | Golgi-specific brefeldin A-resistance factor 1                                        | -1.06 | 0.701 | -1.17 | 0.664 | -2.85 | 0.086 | 1.08  | 0.48  | -1    |
| 1438782_at   | Cntn4             | contactin 4                                                                           | 1.01  | 0.986 | -1.55 | 0.304 | -2    | 0.095 | -2.63 | 0.177 | -1.29 |
| 1445676_at   | Kcnn2             | Potassium intermediate/small conductance calcium-activated channel, subfamily         | -1.98 | 0.031 | -1.11 | 0.699 | -1.33 | 0.297 | 2.16  | 0.156 | -0.57 |
| 1422906_at   | Abcg2             | ATP-binding cassette, sub-family G (WHITE), member 2                                  | -1.22 | 0.03  | -1.38 | 0.008 | -1.63 | 0.204 | 3.99  | 0.179 | -0.06 |
| 1432750_at   | 2810409C01Rik     | RIKEN cDNA 2810409C01 gene                                                            | 1.01  | 0.967 | -1.52 | 0.424 | -2.07 | 0.022 | -1.63 | 0.299 | -1.05 |
| 1443656_at   | Fut8              | fucosyltransferase 8                                                                  | -1.2  | 0.798 | -2.08 | 0.273 | -1.19 | 0.589 | 1.67  | 0.367 | -0.7  |
| 1447126_at   | Cdy12             | Chromodomain protein, Y chromosome-like 2                                             | -1.01 | 0.911 | -1.89 | 0.114 | -1.56 | 0.018 | 1.09  | 0.505 | -0.84 |
| 1437797_at   | Atp2a2            | ATPase, Ca++ transporting, cardiac muscle, slow twitch 2                              | -1.54 | 0.056 | -1.23 | 0.359 | -1.44 | 0.186 | 1.03  | 0.798 | -0.8  |
| 1444706_at   | E430014L09Rik     | RIKEN cDNA E430014L09 gene                                                            | -1.19 | 0.238 | -1.3  | 0.404 | -1.84 | 0.035 | 1.07  | 0.81  | -0.81 |
| 1456969_at   | 9530092O11Rik     | RIKEN cDNA 9530092O11 gene                                                            | -1.64 | 0.617 | -1.01 | 0.975 | -1.78 | 0.311 | 1.34  | 0.717 | -0.77 |
| 1447659_x_at | Atp6v1h           | ATPase, H+ transporting, lysosomal V1 subunit H                                       | -3.54 | 0.033 | 1.28  | 0.535 | -1.69 | 0.319 | -1.78 | 0.512 | -1.43 |
| 1431242_at   | 6330575P09Rik     | RIKEN cDNA 6330575P09 gene                                                            | -1.55 | 0.084 | -2.17 | 0.261 | 1.05  | 0.896 | -2.07 | 0.187 | -1.18 |
| 1458317_at   | Emi1              | Echinoderm microtubule associated protein like 1                                      | -1.55 | 0.611 | -1.26 | 0.559 | -1.4  | 0.106 | 1.61  | 0.089 | -0.65 |
| 1459392_at   | Phf8              | PHD finger protein 8                                                                  | -1.02 | 0.937 | -2.18 | 0.045 | -1.39 | 0.193 | 1.05  | 0.803 | -0.88 |
| 1449539_at   | Ms4a11            | membrane-spanning 4-domains, subfamily A, member 11                                   | -1.25 | 0.606 | -1.2  | 0.812 | -1.91 | 0.222 | 1.88  | 0.358 | -0.62 |
| 1458760_at   | ---               | ---                                                                                   | -1.1  | 0.812 | -1.36 | 0.577 | -1.95 | 0.271 | 1.62  | 0.204 | -0.7  |
| 1432797_at   | 2900060N12Rik     | RIKEN cDNA 2900060N12 gene                                                            | -1.94 | 0.185 | -1.9  | 0.068 | 1.12  | 0.786 | -1.15 | 0.087 | -0.97 |
| 1449596_at   | C78142            | expressed sequence C78142                                                             | -1.02 | 0.974 | -1.61 | 0.153 | -1.79 | 0.091 | 2     | 0.226 | -0.61 |
| 1458913_at   | 4831440E17Rik     | RIKEN cDNA 4831440E17 gene                                                            | 1.15  | 0.659 | -2.41 | 0.116 | -1.67 | 0.145 | -1.82 | 0.065 | -1.19 |
| 1458993_at   | AU022882          | expressed sequence AU022882                                                           | 1.25  | 0.57  | -4.2  | 0.009 | -1.49 | 0.419 | -4.76 | 0.19  | -2.3  |
| 1457732_at   | Pcmt2             | Protein-L-isoaspartate (D-aspartate) O-methyltransferase domain containing 2          | -1.09 | 0.238 | -1.98 | 0.017 | -1.36 | 0.017 | 1     | 0.997 | -0.86 |
| 1449754_at   | AA511261          | expressed sequence AA511261                                                           | -1.59 | 0.239 | -1.27 | 0.583 | -1.34 | 0.427 | 1.39  | 0.612 | -0.7  |
| 1422426_at   | Cmar              | cell matrix adhesion regulator                                                        | -1.46 | 0.261 | -1.29 | 0.309 | -1.43 | 0.214 | 1.22  | 0.413 | -0.74 |
| 1444124_a_at | E330017L17Rik     | RIKEN cDNA E330017L17 gene                                                            | -1.76 | 0.277 | -1.04 | 0.947 | -1.59 | 0.292 | 1.78  | 0.129 | -0.65 |
| 1420561_at   | Trpc7             | transient receptor potential cation channel, subfamily C, member 7                    | -1.35 | 0.562 | -1.17 | 0.593 | -1.77 | 0.21  | 2.34  | 0.36  | -0.49 |
| 1437548_at   | Bicd1             | bicaudal D homolog 1 (Drosophila)                                                     | -1.51 | 0.003 | -1.48 | 0.524 | -1.21 | 0.248 | 1.8   | 0.118 | -0.6  |
| 1447220_at   | 1700125H20Rik     | RIKEN cDNA 1700125H20 gene                                                            | 1.27  | 0.79  | -3.36 | 0.002 | -1.7  | 0.264 | -1.83 | 0.325 | -1.4  |
| 1459363_at   | Atxn2             | Ataxin 2                                                                              | -1.28 | 0.237 | -1.04 | 0.871 | -2.39 | 0.007 | 1.26  | 0.426 | -0.86 |
| 1431603_at   | 4931407E12Rik     | RIKEN cDNA 4931407E12 gene                                                            | -2.31 | 0.035 | 1.03  | 0.923 | -1.43 | 0.338 | -1.36 | 0.505 | -1.02 |
| 1425923_at   | Mycn              | v-myc myelocytomatosis viral related oncogene, neuroblastoma derived (avian)          | -1.86 | 0.35  | -1.25 | 0.375 | -1.22 | 0.452 | 1.39  | 0.534 | -0.73 |
| 1453901_at   | Aldoa-ps2         | aldolase 1, A isoform, pseudogene 2                                                   | -1.34 | 0.609 | -1.11 | 0.809 | -1.95 | 0.057 | 1.86  | 0.135 | -0.63 |
| 1452516_at   | LOC545814 /// 493 | sperm motility kinase 2-like /// RIKEN cDNA 4931427P12 gene                           | -1.48 | 0.493 | -2.39 | 0.034 | 1.07  | 0.899 | -1.78 | 0.078 | -1.15 |
| 1443720_s_at | Bmpr1b            | bone morphogenetic protein receptor, type 1B                                          | -2.47 | 0.039 | 1.03  | 0.966 | -1.38 | 0.328 | -1.16 | 0.818 | -0.99 |
| 1459790_x_at | Alx3              | aristaless 3                                                                          | -1.17 | 0.438 | -1.68 | 0.358 | -1.41 | 0.522 | 1.58  | 0.599 | -0.67 |

|              |                   |                                                                                        |       |       |       |       |       |       |       |       |       |
|--------------|-------------------|----------------------------------------------------------------------------------------|-------|-------|-------|-------|-------|-------|-------|-------|-------|
| 1418995_at   | ---               | ---                                                                                    | -1.52 | 0.126 | -1.68 | 0.273 | -1.1  | 0.556 | 1.04  | 0.385 | -0.82 |
| 1432910_at   | Btbd7             | BTB (POZ) domain containing 7                                                          | -1.29 | 0.445 | -1.3  | 0.229 | -1.62 | 0.002 | 1.13  | 0.241 | -0.77 |
| 1454720_at   | Apba3 /// Hs3st5  | amyloid beta (A4) precursor protein-binding, family A, member 3 /// heparan sulfa      | -3.38 | 0.268 | 1.11  | 0.745 | -1.32 | 0.55  | -1.32 | 0.346 | -1.23 |
| 1447927_at   | Mpa2l /// LOC6265 | macrophage activation 2 like /// similar to macrophage activation 2 like /// similar t | 1.1   | 0.584 | -2.05 | 0.01  | -1.73 | 0.033 | -1.3  | 0.325 | -0.99 |
| 1427551_at   | Usp29             | ubiquitin specific peptidase 29                                                        | -1.67 | 0.344 | -1.05 | 0.937 | -1.64 | 0.308 | 2.59  | 0.058 | -0.44 |
| 1457137_at   | ---               | Transcribed locus                                                                      | -2.28 | 0.167 | -1.17 | 0.695 | -1.15 | 0.722 | 1.45  | 0.595 | -0.79 |
| 1455919_at   | Gm879             | Gene model 879, (NCBI)                                                                 | -1.97 | 0.55  | -1.41 | 0.343 | -1.06 | 0.922 | 1.26  | 0.395 | -0.79 |
| 1432669_at   | 9030420N05Rik     | RIKEN cDNA 9030420N05 gene                                                             | -1.4  | 0.054 | -1.06 | 0.832 | -1.95 | 0.038 | 2.3   | 0.113 | -0.53 |
| 1439284_at   | E230025E14Rik     | RIKEN cDNA E230025E14 gene                                                             | -1.22 | 0.48  | -1.59 | 0.438 | -1.4  | 0.151 | 1.08  | 0.813 | -0.78 |
| 1439545_at   | Nrf1              | Nuclear respiratory factor 1                                                           | -1.28 | 0.02  | -1.47 | 0.029 | -1.42 | 0.05  | 1.34  | 0.139 | -0.71 |
| 1435206_at   | Slc24a4           | solute carrier family 24 (sodium/potassium/calcium exchanger), member 4                | -1.92 | 0.212 | -2.24 | 0.005 | 1.2   | 0.227 | -2.07 | 0.283 | -1.26 |
| 1433322_at   | 4930529F21Rik     | RIKEN cDNA 4930529F21 gene                                                             | -1.82 | 0.263 | -1.35 | 0.66  | -1.15 | 0.707 | 1.44  | 0.199 | -0.72 |
| 1437472_at   | Unc13a            | unc-13 homolog A (C. elegans)                                                          | -1.09 | 0.778 | -1.45 | 0.628 | -1.8  | 0.356 | 2.24  | 0.077 | -0.53 |
| 1433168_x_at | 5830456J23Rik     | RIKEN cDNA 5830456J23 gene                                                             | 1.08  | 0.803 | -2.46 | 0.039 | -1.48 | 0.614 | -1.62 | 0.217 | -1.12 |
| 1432090_at   | Ccdc83            | coiled-coil domain containing 83                                                       | -2.76 | 0.02  | -1.32 | 0.66  | 1.05  | 0.945 | -2.09 | 0.447 | -1.28 |
| 1428041_at   | 1600002H07Rik     | RIKEN cDNA 1600002H07 gene                                                             | -3.2  | 0.097 | 1.04  | 0.925 | -1.23 | 0.439 | -1.13 | 0.899 | -1.13 |
| 1459564_at   | C87580            | expressed sequence C87580                                                              | 1     | 0.997 | -2.55 | 0.057 | -1.29 | 0.336 | -1.68 | 0.176 | -1.13 |
| 1419831_at   | AA416453          | expressed sequence AA416453                                                            | 1.26  | 0.687 | -2.18 | 0.108 | -2.22 | 0.028 | -1.28 | 0.482 | -1.11 |
| 1440716_at   | 6430604M11Rik     | RIKEN cDNA 6430604M11 gene                                                             | -2.26 | 0.341 | -1.23 | 0.581 | -1.1  | 0.638 | 1.39  | 0.362 | -0.8  |
| 1422290_at   | Htr1d             | 5-hydroxytryptamine (serotonin) receptor 1D                                            | -1.34 | 0.467 | -2.37 | 0.256 | -1    | 0.999 | 1.41  | 0.231 | -0.82 |
| 1445950_at   | C87926            | cDNA sequence, C87926                                                                  | -1.82 | 0.397 | -1.9  | 0.271 | 1.09  | 0.711 | -1.53 | 0.108 | -1.04 |
| 1448016_at   | Sass6             | spindle assembly 6 homolog (C. elegans)                                                | -1.22 | 0.452 | -1.88 | 0.133 | -1.22 | 0.191 | 2.54  | 0.146 | -0.45 |
| 1422606_at   | C1qtnf3           | C1q and tumor necrosis factor related protein 3                                        | -1    | 0.986 | -1.16 | 0.458 | -3.25 | 0.004 | 1.89  | 0.262 | -0.88 |
| 1431647_a_at | Ceacam13          | CEA-related cell adhesion molecule 13                                                  | -3.3  | 0.105 | 1.1   | 0.828 | -1.3  | 0.678 | -2.13 | 0.464 | -1.41 |
| 1456122_at   | ---               | ---                                                                                    | -1.15 | 0.565 | -1.52 | 0.192 | -1.56 | 0.182 | 1.01  | 0.971 | -0.81 |
| 1439749_at   | Zap70             | zeta-chain (TCR) associated protein kinase                                             | -1.18 | 0.156 | -1.44 | 0.034 | -1.59 | 0.22  | 1.74  | 0.511 | -0.62 |
| 1421517_at   | St6galnac1        | ST6 (alpha-N-acetyl-neuraminyl-2,3-beta-galactosyl-1,3)-N-acetylgalactosaminidase      | 1.01  | 0.987 | -1.21 | 0.366 | -2.99 | 0.062 | -1.43 | 0.379 | -1.16 |
| 1449071_at   | Myl7              | myosin, light polypeptide 7, regulatory                                                | -3.12 | 0.393 | 1.11  | 0.811 | -1.36 | 0.267 | -1.27 | 0.737 | -1.16 |
| 1457175_at   | Numb              | Numb gene homolog (Drosophila)                                                         | -1.31 | 0.148 | -1.52 | 0.1   | -1.35 | 0.119 | 1.1   | 0.683 | -0.77 |
| 1422298_at   | 5530401N06Rik     | RIKEN cDNA 5530401N06 gene                                                             | -1.43 | 0.358 | -1.14 | 0.795 | -1.69 | 0.021 | 1.63  | 0.257 | -0.66 |
| 1430352_at   | 8430417A20Rik     | RIKEN cDNA 8430417A20 gene                                                             | 1     | 0.997 | -1.27 | 0.272 | -2.64 | 0.194 | -1.46 | 0.295 | -1.09 |
| 1446303_at   | Igf1r             | insulin-like growth factor I receptor                                                  | -1.22 | 0.45  | -1.45 | 0.107 | -1.52 | 0.191 | 1.16  | 0.533 | -0.76 |
| 1430073_at   | 2900016B01Rik     | RIKEN cDNA 2900016B01 gene                                                             | -2.12 | 0.447 | -1.34 | 0.621 | -1.05 | 0.644 | 1.11  | 0.697 | -0.85 |
| 1431351_at   | Pvt1              | plasmacytoma variant translocation 1                                                   | -1.62 | 0.124 | -1.64 | 0.297 | -1.06 | 0.83  | 1.54  | 0.217 | -0.7  |
| 1442962_at   | AU022052          | expressed sequence AU022052                                                            | -1.59 | 0.173 | -1.36 | 0.232 | -1.24 | 0.633 | 2.21  | 0.135 | -0.5  |
| 1421769_at   | Lmx1b             | LIM homeobox transcription factor 1 beta                                               | -1.74 | 0.186 | -1.95 | 0.206 | 1.08  | 0.77  | -1.32 | 0.497 | -0.98 |
| 1416626_at   | Pla2g1b           | phospholipase A2, group IB, pancreas                                                   | -1.25 | 0.607 | -1.52 | 0.442 | -1.4  | 0.24  | 1.11  | 0.883 | -0.77 |
| 1447049_at   | Iqwd1             | IQ motif and WD repeats 1                                                              | -1.19 | 0.661 | -1.74 | 0.047 | -1.33 | 0.116 | 1.73  | 0.136 | -0.63 |
| 1444711_at   | Ankrd15           | ankyrin repeat domain 15                                                               | -1.05 | 0.925 | -1.77 | 0.317 | -1.52 | 0.633 | 1.23  | 0.47  | -0.78 |
| 1454131_at   | 4931413K12Rik     | RIKEN cDNA 4931413K12 gene                                                             | -1.37 | 0.024 | -1.77 | 0.273 | -1.14 | 0.796 | 1.97  | 0.36  | -0.58 |
| 1433157_at   | 6330562C20Rik     | RIKEN cDNA 6330562C20 gene                                                             | -2.49 | 0.177 | -1.34 | 0.494 | 1.02  | 0.958 | -1.32 | 0.521 | -1.03 |
| 1455446_x_at | Acadsb            | acyl-Coenzyme A dehydrogenase, short/branched chain                                    | -1.2  | 0.007 | -1.35 | 0.014 | -1.68 | 0.013 | 1.13  | 0.478 | -0.78 |
| 1448991_a_at | Ina               | interneuron neuronal intermediate filament protein, alpha                              | 1.02  | 0.966 | -2.04 | 0.043 | -1.5  | 0.166 | -2.43 | 0.147 | -1.24 |
| 1447091_at   | Jmjd2c            | Jumonji domain containing 2C                                                           | -1.07 | 0.915 | -1.45 | 0.257 | -1.82 | 0.04  | 1.39  | 0.416 | -0.74 |
| 1427426_at   | Kcnq5             | potassium voltage-gated channel, subfamily Q, member 5                                 | 1.12  | 0.514 | -3.42 | 0.05  | -1.33 | 0.548 | -1.22 | 0.557 | -1.21 |
| 1451823_at   | Clca4             | chloride channel calcium activated 4                                                   | -4.13 | 0.095 | 1.55  | 0.324 | -2.61 | 0.066 | -1.39 | 0.469 | -1.65 |
| 1447656_at   | Zdhhc17           | zinc finger, DHHC domain containing 17                                                 | -1.71 | 0.061 | -1.44 | 0.349 | -1.12 | 0.816 | 1.11  | 0.869 | -0.79 |
| 1446935_at   | 9130011E15Rik     | RIKEN cDNA 9130011E15 gene                                                             | -4.73 | 0.224 | -1.63 | 0.37  | 1.35  | 0.013 | -1.14 | 0.793 | -1.54 |
| 1447299_at   | ---               | ---                                                                                    | 1.14  | 0.884 | -1.72 | 0.341 | -2.2  | 0.025 | -1.02 | 0.896 | -0.95 |
| 1425208_at   | Lbh               | limb-bud and heart                                                                     | -1.7  | 0.627 | -2.03 | 0.342 | 1.09  | 0.889 | -1.44 | 0.632 | -1.02 |
| 1454528_at   | A930011E06Rik     | RIKEN cDNA A930011E06 gene                                                             | -1.84 | 0.222 | -1.01 | 0.978 | -1.56 | 0.316 | 1.04  | 0.961 | -0.84 |
| 1432303_at   | 9330198I05Rik     | RIKEN cDNA 9330198I05 gene                                                             | -1.46 | 0.047 | -1.26 | 0.374 | -1.44 | 0.323 | 1.52  | 0.403 | -0.66 |
| 1444914_at   | ---               | ---                                                                                    | -1.61 | 0.301 | -2.83 | 0.243 | 1.2   | 0.641 | -1.64 | 0.275 | -1.22 |

|              |                   |                                                                                    |       |       |       |       |       |       |       |       |       |
|--------------|-------------------|------------------------------------------------------------------------------------|-------|-------|-------|-------|-------|-------|-------|-------|-------|
| 1445837_at   | Ga17              | Dendritic cell protein GA17                                                        | -1.28 | 0.579 | 1.05  | 0.705 | -2.92 | 0.003 | -1.91 | 0.067 | -1.27 |
| 1447273_x_at | Atp10a            | ATPase, class V, type 10A                                                          | -2.16 | 0.204 | -1.25 | 0.721 | -1.1  | 0.758 | 1.06  | 0.75  | -0.86 |
| 1437574_at   | Adamts18          | a disintegrin-like and metallopeptidase (reprolysin type) with thrombospondin type | -1.53 | 0.194 | -3.02 | 0.404 | 1.19  | 0.672 | -1.47 | 0.618 | -1.21 |
| 1449593_at   | ---               | ---                                                                                | 1.12  | 0.753 | -1.53 | 0.482 | -2.47 | 0.163 | -1.52 | 0.306 | -1.1  |
| 1443153_at   | Trip11            | Thyroid hormone receptor interactor 11                                             | -1.52 | 0.323 | 1.01  | 0.957 | -1.99 | 0.005 | -1.79 | 0.04  | -1.07 |
| 1457539_at   | D10Ert709e        | DNA segment, Chr 10, ERATO Doi 709, expressed                                      | -1.2  | 0.329 | -1.58 | 0.169 | -1.41 | 0.09  | 1.15  | 0.287 | -0.76 |
| 1415846_a_at | Ldhc              | lactate dehydrogenase C                                                            | -2.33 | 0.357 | -1.89 | 0.182 | 1.22  | 0.719 | -1.52 | 0.518 | -1.13 |
| 1449381_a_at | Paccin1           | protein kinase C and casein kinase substrate in neurons 1                          | -2.29 | 0.47  | 1.02  | 0.868 | -1.4  | 0.302 | -2.92 | 0.059 | -1.4  |
| 1430265_at   | Appbp2            | amyloid beta precursor protein (cytoplasmic tail) binding protein 2                | -1.88 | 0.192 | 1.08  | 0.867 | -1.78 | 0.067 | -1.3  | 0.123 | -0.97 |
| 1446965_at   | Arhgef12          | Rho guanine nucleotide exchange factor (GEF) 12                                    | -1.21 | 0.445 | -1.3  | 0.167 | -1.73 | 0.029 | 2.03  | 0.142 | -0.55 |
| 1432789_at   | 8030476L19Rik     | RIKEN cDNA 8030476L19 gene                                                         | -3.96 | 0.339 | -1.16 | 0.775 | 1.06  | 0.87  | -1.12 | 0.878 | -1.29 |
| 1445518_at   | Zfhx1b            | Zinc finger homeobox 1b                                                            | -1.15 | 0.498 | -1.32 | 0.264 | -1.82 | 0.057 | 1.12  | 0.717 | -0.79 |
| 1439669_at   | 6430571L13Rik     | RIKEN cDNA 6430571L13 gene                                                         | -1.16 | 0.568 | -1.25 | 0.73  | -1.95 | 0.263 | 2.22  | 0.181 | -0.53 |
| 1459133_at   | Edem3             | ER degradation enhancer, mannosidase alpha-like 3                                  | 1.07  | 0.825 | -1.56 | 0.114 | -2.16 | 0.02  | -1.33 | 0.216 | -0.99 |
| 1459365_at   | 4930429A22Rik     | RIKEN cDNA 4930429A22 gene                                                         | -1.16 | 0.64  | -1.19 | 0.449 | -2.09 | 0.104 | 1.44  | 0.488 | -0.75 |
| 1439915_at   | Mrg1              | Myeloid ecotropic viral integration site-related gene 1                            | -1.23 | 0.228 | -1.6  | 0.289 | -1.35 | 0.465 | 1.43  | 0.153 | -0.69 |
| 1443062_at   | Aut2              | autism susceptibility candidate 2                                                  | 1.04  | 0.967 | -1.15 | 0.655 | -3.69 | 0.065 | -2.01 | 0.307 | -1.45 |
| 1426561_a_at | Npnt              | nephronectin                                                                       | 1.14  | 0.376 | -1.63 | 0.54  | -2.37 | 0.004 | -1.73 | 0.133 | -1.15 |
| 1445939_at   | Mtus1             | Mitochondrial tumor suppressor 1                                                   | -1.29 | 0.665 | -1.12 | 0.883 | -1.97 | 0.028 | 2.34  | 0.098 | -0.51 |
| 1441330_at   | Crb1              | crumbs homolog 1 (Drosophila)                                                      | -1.52 | 0.294 | -1.02 | 0.963 | -1.84 | 0.009 | 2.48  | 0.28  | -0.48 |
| 1444509_at   | ---               | Transcribed locus                                                                  | -1.14 | 0.741 | -1.94 | 0.294 | -1.28 | 0.434 | 1.79  | 0.135 | -0.64 |
| 1422296_at   | 5730470L24Rik     | RIKEN cDNA 5730470L24 gene                                                         | -1.67 | 0.063 | -1.26 | 0.664 | -1.28 | 0.422 | 1.34  | 0.691 | -0.71 |
| 1421396_at   | Pcsk1             | proprotein convertase subtilisin/kexin type 1                                      | -1.36 | 0.767 | -1.67 | 0.429 | -1.18 | 0.217 | 1.17  | 0.501 | -0.76 |
| 1435537_at   | Ptprd             | protein tyrosine phosphatase, receptor type, D                                     | -1.16 | 0.205 | -1.34 | 0.051 | -1.75 | 0.016 | 1.12  | 0.774 | -0.79 |
| 1441376_at   | Gabarapl2         | gamma-aminobutyric acid (GABA-A) receptor-associated protein-like 2                | -1.14 | 0.083 | -1.56 | 0.012 | -1.52 | 0.074 | 1.45  | 0.201 | -0.69 |
| 1445381_at   | ---               | ---                                                                                | -2.54 | 0.097 | -1.27 | 0.475 | -1.01 | 0.988 | 1.48  | 0.304 | -0.83 |
| 1431541_at   | Stt3b             | STT3, subunit of the oligosaccharyltransferase complex, homolog B (S. cerevisiae)  | -1.55 | 0.479 | -1.92 | 0.394 | 1.01  | 0.967 | -1.19 | 0.76  | -0.91 |
| 1420260_at   | Phf7              | PHD finger protein 7                                                               | -1.36 | 0.256 | -1.37 | 0.532 | -1.4  | 0.495 | 1.07  | 0.803 | -0.77 |
| 1446576_at   | 4931419K03Rik     | RIKEN cDNA 4931419K03 gene                                                         | -1.68 | 0.512 | -1.57 | 0.606 | -1.06 | 0.93  | 3.3   | 0.337 | -0.25 |
| 1454940_at   | Psma5 /// LOC5456 | proteasome (prosome, macropain) subunit, alpha type 5 /// similar to Proteasome    | -1.11 | 0.645 | -1.87 | 0.158 | -1.34 | 0.258 | 1     | 0.994 | -0.83 |
| 1425126_at   | Ncam1             | neural cell adhesion molecule 1                                                    | -1.7  | 0.58  | 1.2   | 0.632 | -2.57 | 0.088 | -2.73 | 0.029 | -1.45 |
| 1425800_at   | Rad9b             | RAD9 homolog B (S. cerevisiae)                                                     | -1.17 | 0.541 | -2.24 | 0.084 | -1.14 | 0.522 | 1.66  | 0.269 | -0.72 |
| 1445515_at   | ---               | ---                                                                                | -1.93 | 0.363 | -1.16 | 0.741 | -1.25 | 0.163 | 1.3   | 0.474 | -0.76 |
| 1442718_at   | ---               | 7 days neonate cerebellum cDNA, RIKEN full-length enriched library, clone:A730     | -1.82 | 0.222 | 1.09  | 0.799 | -1.86 | 0.307 | -1.42 | 0.237 | -1    |
| 1441754_at   | ---               | ---                                                                                | 1.07  | 0.848 | -2.72 | 0.064 | -1.34 | 0.403 | -1    | 0.986 | -1    |
| 1442633_at   | ---               | Transcribed locus, weakly similar to XP_576460.1 PREDICTED: similar to hypoth      | -1.03 | 0.82  | -2.1  | 0.049 | -1.36 | 0.083 | 1.44  | 0.589 | -0.76 |
| 1451032_at   | Fhl4              | four and a half LIM domains 4                                                      | -3.26 | 0.05  | -1.17 | 0.79  | 1.02  | 0.969 | -2.81 | 0.165 | -1.56 |
| 1432994_at   | 2900057E15Rik     | RIKEN cDNA 2900057E15 gene                                                         | 1.28  | 0.736 | -2.95 | 0.312 | -1.78 | 0.295 | -1.01 | 0.971 | -1.12 |
| 1445217_at   | A730073F16Rik     | RIKEN cDNA A730073F16 gene                                                         | 1.04  | 0.948 | -1.73 | 0.535 | -1.78 | 0.469 | -1.48 | 0.135 | -0.99 |
| 1444472_at   | Snf1lk2           | SNF1-like kinase 2                                                                 | -1.3  | 0.399 | -1.32 | 0.324 | -1.53 | 0.022 | 1.15  | 0.551 | -0.75 |
| 1445327_at   | Cyfp1             | Cytoplasmic FMR1 interacting protein 1                                             | -1.13 | 0.764 | -1.83 | 0.128 | -1.34 | 0.257 | 1.35  | 0.116 | -0.74 |
| 1447531_x_at | ---               | ---                                                                                | -1.21 | 0.607 | -1.4  | 0.379 | -1.56 | 0.073 | 1.18  | 0.687 | -0.75 |
| 1437827_s_at | Pfpl              | Pore forming protein-like                                                          | -1.94 | 0.427 | -1.07 | 0.866 | -1.37 | 0.393 | 1.35  | 0.638 | -0.76 |
| 1442921_at   | Mmp24             | Matrix metallopeptidase 24                                                         | -1.72 | 0.254 | -2.22 | 0.066 | 1.15  | 0.689 | -1.37 | 0.653 | -1.04 |
| 1431851_at   | 4930534P07Rik     | RIKEN cDNA 4930534P07 gene                                                         | -4.01 | 0.08  | -2.17 | 0.152 | 1.47  | 0.17  | -1.32 | 0.554 | -1.51 |
| 1431260_at   | 4833417C18Rik     | RIKEN cDNA 4833417C18 gene                                                         | -1.3  | 0.534 | -1.78 | 0.059 | -1.18 | 0.603 | 1.15  | 0.292 | -0.78 |
| 1433160_at   | 1700008N17Rik     | RIKEN cDNA 1700008N17 gene                                                         | -1.11 | 0.892 | -1.78 | 0.022 | -1.39 | 0.482 | 1.21  | 0.716 | -0.77 |
| 1446114_at   | Inpp5a            | Inositol polyphosphate-5-phosphatase A                                             | -2.3  | 0.269 | 1.14  | 0.835 | -1.64 | 0.1   | -2.8  | 0.225 | -1.4  |
| 1425759_at   | Nobox             | NOBOX oogenesis homeobox                                                           | -1.07 | 0.927 | -1.84 | 0.237 | -1.43 | 0.478 | 1.82  | 0.449 | -0.63 |
| 1436239_at   | Slc5a5            | solute carrier family 5 (sodium iodide symporter), member 5                        | -2.38 | 0.005 | -1.82 | 0.023 | 1.21  | 0.501 | -1.05 | 0.656 | -1.01 |
| 1458367_at   | Gm94              | gene model 94, (NCBI)                                                              | -1.73 | 0.434 | -3.4  | 0.025 | 1.31  | 0.422 | -1.08 | 0.914 | -1.22 |
| 1418213_at   | Krt23             | keratin 23                                                                         | -5    | 0.004 | 1.23  | 0.852 | -1.33 | 0.113 | -1.81 | 0.284 | -1.73 |
| 1439586_at   | LOC548102         | hypothetical LOC548102                                                             | -1.22 | 0.538 | -1.46 | 0.003 | -1.48 | 0.077 | 1.14  | 0.75  | -0.75 |

|              |               |                                                                                |       |       |       |       |       |       |       |       |       |
|--------------|---------------|--------------------------------------------------------------------------------|-------|-------|-------|-------|-------|-------|-------|-------|-------|
| 1427865_at   | ---           | ---                                                                            | -1.61 | 0.495 | 1.26  | 0.297 | -3.35 | 0.025 | -2.56 | 0.364 | -1.56 |
| 1440345_at   | Al450353      | expressed sequence Al450353                                                    | -1.63 | 0.355 | -1.18 | 0.162 | -1.39 | 0.517 | 1.29  | 0.388 | -0.73 |
| 1450277_at   | Avpr2         | arginine vasopressin receptor 2                                                | 1     | 0.961 | -2.07 | 0.02  | -1.44 | 0.602 | -1.09 | 0.726 | -0.9  |
| 1446526_at   | 9330199F22Rik | RIKEN cDNA 9330199F22 gene                                                     | -1.25 | 0.103 | -1.97 | 0.283 | -1.14 | 0.553 | 1.02  | 0.965 | -0.84 |
| 1443613_x_at | Ascc2         | Activating signal cointegrator 1 complex subunit 2                             | -1.46 | 0.717 | -1.39 | 0.09  | -1.28 | 0.263 | 1.03  | 0.966 | -0.78 |
| 1440506_at   | Slc7a2        | Solute carrier family 7 (cationic amino acid transporter, y+ system), member 2 | -1.66 | 0.387 | -1.87 | 0.144 | 1.05  | 0.828 | -1.78 | 0.35  | -1.07 |
| 1438747_at   | A930006K02Rik | RIKEN cDNA A930006K02 gene                                                     | -1.33 | 0.472 | -1.58 | 0.377 | -1.25 | 0.63  | 2.09  | 0.261 | -0.52 |
| 1440662_at   | Rgl1          | Ral guanine nucleotide dissociation stimulator,-like 1                         | -1.48 | 0.233 | -1.09 | 0.851 | -1.7  | 0.065 | 1.08  | 0.872 | -0.8  |
| 1440436_at   | A730030A06    | hypothetical protein A730030A06                                                | -1.41 | 0.174 | -1.2  | 0.553 | -1.56 | 0.084 | 1.81  | 0.291 | -0.59 |
| 1458473_at   | Pou6f2        | POU domain, class 6, transcription factor 2                                    | -1.48 | 0.433 | -1.28 | 0.517 | -1.37 | 0.114 | 1.02  | 0.886 | -0.78 |
| 1421048_a_at | Ypel1         | yippee-like 1 (Drosophila)                                                     | -1.29 | 0.402 | -1.89 | 0.15  | -1.14 | 0.333 | 1.03  | 0.692 | -0.82 |
| 1454457_at   | 4930439G18Rik | RIKEN cDNA 4930439G18 gene                                                     | -1.56 | 0.324 | -1.41 | 0.139 | -1.2  | 0.519 | 1.11  | 0.78  | -0.76 |
| 1449463_at   | Klk1b8        | kallikrein 1-related peptidase b8                                              | -1.54 | 0.463 | -1.28 | 0.731 | -1.32 | 0.521 | 1.46  | 0.302 | -0.67 |
| 1449881_a_at | Casr          | calcium-sensing receptor                                                       | -1.13 | 0.314 | -1.46 | 0.387 | -1.62 | 0.094 | 1.57  | 0.577 | -0.66 |
| 1446909_at   | Amotl1        | Angiomotin-like 1                                                              | -2.08 | 0.248 | -1.01 | 0.987 | -1.4  | 0.569 | 1.52  | 0.155 | -0.74 |
| 1420585_a_at | Nxf2          | nuclear RNA export factor 2                                                    | -1.39 | 0.227 | -1.21 | 0.567 | -1.55 | 0.024 | 1.24  | 0.477 | -0.73 |
| 1455782_at   | Samd7         | sterile alpha motif domain containing 7                                        | -2.61 | 0.048 | 1.13  | 0.695 | -1.49 | 0.471 | -1.23 | 0.687 | -1.05 |
| 1448949_at   | Car4          | carbonic anhydrase 4                                                           | -1.13 | 0.394 | -1.53 | 0.481 | -1.53 | 0.006 | 1.87  | 0.113 | -0.58 |
| 1437049_at   | ---           | Transcribed locus                                                              | -1.26 | 0.07  | -1.42 | 0.315 | -1.46 | 0.109 | 1.57  | 0.102 | -0.64 |
| 1458472_at   | 4932417H02Rik | RIKEN cDNA 4932417H02 gene                                                     | -1.2  | 0.538 | -2.99 | 0.153 | 1.02  | 0.928 | -1.3  | 0.307 | -1.12 |
| 1458817_at   | ---           | ---                                                                            | -1.23 | 0.829 | -1.46 | 0.577 | -1.45 | 0.459 | 1.61  | 0.292 | -0.63 |
| 1444642_at   | ---           | Transcribed locus                                                              | -1.15 | 0.533 | -1.3  | 0.469 | -1.82 | 0.118 | 1.21  | 0.355 | -0.76 |
| 1450595_at   | V1rc1         | vomeroneasal 1 receptor, C1                                                    | -1.54 | 0.183 | -1.62 | 0.368 | -1.08 | 0.729 | 1.62  | 0.205 | -0.66 |
| 1457565_at   | C130052G03Rik | RIKEN cDNA C130052G03 gene                                                     | -2.24 | 0.056 | -1.19 | 0.715 | -1.11 | 0.795 | 2.3   | 0.269 | -0.56 |
| 1418171_at   | Tceal8        | transcription elongation factor A (SII)-like 8                                 | -1.25 | 0.055 | -1.29 | 0.138 | -1.63 | 0.007 | 2.69  | 0.321 | -0.37 |
| 1445757_at   | Tbx3          | T-box 3                                                                        | 1.22  | 0.648 | -2.16 | 0.07  | -1.98 | 0.007 | -1.16 | 0.414 | -1.02 |
| 1438743_at   | Cyp7a1        | cytochrome P450, family 7, subfamily a, polypeptide 1                          | -1.54 | 0.563 | -1.39 | 0.284 | -1.22 | 0.335 | 1.25  | 0.322 | -0.73 |
| 1459325_at   | ---           | 7 days neonate cerebellum cDNA, RIKEN full-length enriched library, clone:A730 | -1.49 | 0.172 | -1.36 | 0.177 | -1.28 | 0.082 | 1.21  | 0.683 | -0.73 |
| 1459248_at   | Ptpn9         | Protein tyrosine phosphatase, non-receptor type 9                              | -1.51 | 0.529 | 1.06  | 0.877 | -2.13 | 0.145 | -1.61 | 0.178 | -1.05 |
| 1432957_at   | 5730407O05Rik | RIKEN cDNA 5730407O05 gene                                                     | -1.24 | 0.809 | -1.1  | 0.9   | -2.13 | 0.248 | 1.74  | 0.477 | -0.68 |
| 1433394_at   | Mast4         | microtubule associated serine/threonine kinase family member 4                 | -1.24 | 0.422 | -1.62 | 0.481 | -1.31 | 0.093 | 1.01  | 0.966 | -0.79 |
| 1440697_at   | Al746446      | expressed sequence Al746446                                                    | -1.24 | 0.415 | -2.7  | 0.065 | 1.01  | 0.98  | -1.07 | 0.883 | -1    |
| 1427812_at   | Ids           | iduronate 2-sulfatase                                                          | -1.77 | 0.531 | -1.38 | 0.548 | -1.11 | 0.72  | 1.16  | 0.85  | -0.77 |
| 1442862_at   | ---           | ---                                                                            | 1.04  | 0.63  | -2.01 | 0.282 | -1.53 | 0.003 | -1.31 | 0.241 | -0.95 |
| 1430096_at   | 2900017F05Rik | RIKEN cDNA 2900017F05 gene                                                     | -1.98 | 0.188 | -1.38 | 0.359 | -1.04 | 0.851 | 1.59  | 0.551 | -0.7  |
| 1422634_a_at | Vsig2         | V-set and immunoglobulin domain containing 2                                   | -1    | 0.995 | -1.78 | 0.144 | -1.59 | 0.003 | 1.17  | 0.738 | -0.8  |
| 1424296_at   | Gclc          | glutamate-cysteine ligase, catalytic subunit                                   | -1.32 | 0.081 | -1.52 | 0.065 | -1.3  | 0.007 | 2.39  | 0.199 | -0.44 |
| 1431412_at   | 2810455B08Rik | RIKEN cDNA 2810455B08 gene                                                     | 1.04  | 0.866 | -1.71 | 0.044 | -1.76 | 0.027 | -1.34 | 0.307 | -0.94 |
| 1456104_at   | Psm11         | proteasome (prosome, macropain) 26S subunit, non-ATPase, 11                    | -1.76 | 0.07  | -1.54 | 0.207 | -1.03 | 0.787 | 1.07  | 0.645 | -0.81 |
| 1443557_at   | ---           | ---                                                                            | -1.79 | 0.562 | -1.93 | 0.225 | 1.12  | 0.596 | -1.4  | 0.252 | -1    |
| 1440969_at   | BC030308      | cDNA sequence BC030308                                                         | -1.21 | 0.212 | -1.2  | 0.587 | -1.89 | 0.006 | 1.08  | 0.581 | -0.8  |
| 1435104_at   | D130004H04Rik | RIKEN cDNA D130004H04 gene                                                     | -3.09 | 0.298 | -1.27 | 0.642 | 1.08  | 0.874 | -2.55 | 0.23  | -1.46 |
| 1444530_at   | ---           | Transcribed locus                                                              | -1.15 | 0.544 | -1.64 | 0.013 | -1.41 | 0.252 | 1.03  | 0.867 | -0.79 |
| 1459822_at   | Rae1          | RAE1 RNA export 1 homolog (S. pombe)                                           | -1.04 | 0.954 | -1.33 | 0.719 | -2.1  | 0.267 | 1.23  | 0.786 | -0.81 |
| 1446651_at   | ---           | ---                                                                            | -2.14 | 0.399 | -1.26 | 0.688 | -1.07 | 0.897 | 2.16  | 0.34  | -0.58 |
| 1431770_at   | Cherp         | calcium homeostasis endoplasmic reticulum protein                              | -1.2  | 0.775 | -1.48 | 0.321 | -1.45 | 0.103 | 1.11  | 0.491 | -0.76 |
| 1443981_at   | ---           | ---                                                                            | -1.04 | 0.927 | -2.17 | 0.003 | -1.29 | 0.014 | 1.18  | 0.66  | -0.83 |
| 1454235_a_at | Ing5          | inhibitor of growth family, member 5                                           | -1.48 | 0.487 | -1.92 | 0.287 | -1    | 0.995 | 1.02  | 0.957 | -0.85 |
| 1450046_at   | Tmem59        | transmembrane protein 59                                                       | -1.48 | 0.107 | -1.8  | 0.004 | -1.04 | 0.745 | 1.39  | 0.38  | -0.73 |
| 1459210_at   | Tmem108       | transmembrane protein 108                                                      | -2.25 | 0.125 | 1.19  | 0.576 | -1.8  | 0.002 | -1.69 | 0.195 | -1.14 |
| 1453625_at   | 2210407P21Rik | RIKEN cDNA 2210407P21 gene                                                     | -1.52 | 0.372 | -1.42 | 0.222 | -1.2  | 0.642 | 1.65  | 0.438 | -0.62 |
| 1428994_s_at | 1110017I16Rik | RIKEN cDNA 1110017I16 gene                                                     | -1.02 | 0.976 | -3.59 | 0.351 | -1.07 | 0.892 | 1.11  | 0.848 | -1.14 |
| 1453966_at   | 2610008G14Rik | RIKEN cDNA 2610008G14 gene                                                     | -1.25 | 0.529 | -1.14 | 0.76  | -1.95 | 0.329 | 1.22  | 0.783 | -0.78 |

|              |                   |                                                                                     |       |       |       |       |       |       |       |       |       |
|--------------|-------------------|-------------------------------------------------------------------------------------|-------|-------|-------|-------|-------|-------|-------|-------|-------|
| 1460122_at   | Tmem41b           | transmembrane protein 41B                                                           | -1.28 | 0.018 | -1.42 | 0.185 | -1.42 | 0.035 | 1.36  | 0.184 | -0.69 |
| 1453523_at   | A030006P16Rik     | RIKEN cDNA A030006P16 gene                                                          | 1.01  | 0.92  | -1.21 | 0.635 | -2.84 | 0.022 | -1.09 | 0.838 | -1.03 |
| 1456459_x_at | Ccdc53            | coiled-coil domain containing 53                                                    | 1.13  | 0.922 | -2.54 | 0.108 | -1.49 | 0.466 | -1.58 | 0.533 | -1.12 |
| 1447532_at   | 1700025G04Rik     | RIKEN cDNA 1700025G04 gene                                                          | -1.62 | 0.703 | -1.62 | 0.424 | -1.04 | 0.832 | 1.19  | 0.231 | -0.77 |
| 1448044_a_at | ---               | Adult male kidney cDNA, RIKEN full-length enriched library, clone:F530012N16 p      | -1.31 | 0.154 | -1.72 | 0.055 | -1.18 | 0.716 | 2     | 0.196 | -0.55 |
| 1429052_at   | Ptprd             | protein tyrosine phosphatase, receptor type, D                                      | -1.05 | 0.408 | -1.29 | 0.294 | -2.13 | 0.013 | 1.06  | 0.88  | -0.85 |
| 1455619_at   | BC062258          | cDNA sequence BC062258                                                              | 1     | 0.998 | -1.93 | 0.207 | -1.48 | 0.216 | -1.54 | 0.012 | -0.99 |
| 1445509_at   | Atf7              | Activating transcription factor 7                                                   | -1.57 | 0.431 | -1.72 | 0.112 | -1.02 | 0.93  | 1.26  | 0.072 | -0.76 |
| 1437579_at   | Nek2              | NIMA (never in mitosis gene a)-related expressed kinase 2                           | -1.24 | 0.186 | -1.78 | 0.126 | -1.2  | 0.283 | 1.47  | 0.37  | -0.69 |
| 1432788_at   | 6720420G18Rik     | RIKEN cDNA 6720420G18 gene                                                          | -1.95 | 0.475 | -1.33 | 0.554 | -1.07 | 0.801 | 1.53  | 0.229 | -0.71 |
| 1447835_at   | 2610528K11Rik     | RIKEN cDNA 2610528K11 gene                                                          | -1.58 | 0.408 | -1.28 | 0.686 | -1.28 | 0.545 | 1.92  | 0.131 | -0.55 |
| 1420071_at   | Serpnb6e          | serine (or cysteine) peptidase inhibitor, clade B, member 6e                        | -1.4  | 0.722 | -1.18 | 0.757 | -1.57 | 0.246 | 1.73  | 0.233 | -0.61 |
| 1433581_at   | 1190002N15Rik     | RIKEN cDNA 1190002N15 gene                                                          | -1.28 | 0.288 | -1.09 | 0.232 | -2    | 0.084 | 1.31  | 0.37  | -0.76 |
| 1441050_at   | Strn3             | Striatin, calmodulin binding protein 3                                              | -1.04 | 0.87  | -1.31 | 0.182 | -2.11 | 0.047 | 1.03  | 0.858 | -0.86 |
| 1441366_at   | ---               | ---                                                                                 | -1.5  | 0.008 | -2.28 | 0.381 | 1.09  | 0.868 | -1.08 | 0.587 | -0.94 |
| 1445527_at   | Kpna3             | Karyopherin (importin) alpha 3                                                      | -1.57 | 0.515 | -1.11 | 0.903 | -1.51 | 0.128 | 1.08  | 0.479 | -0.78 |
| 1434319_at   | Mdh1              | malate dehydrogenase 1, NAD (soluble)                                               | -1.53 | 0.604 | -1.03 | 0.88  | -1.73 | 0.193 | 1.18  | 0.472 | -0.78 |
| 1457766_at   | Wfdc6a            | WAP four-disulfide core domain 6A                                                   | -1.26 | 0.61  | -1.01 | 0.984 | -2.38 | 0.039 | 1.45  | 0.271 | -0.8  |
| 1421390_at   | Slc12a1           | solute carrier family 12, member 1                                                  | -1.54 | 0.327 | -1.52 | 0.498 | -1.13 | 0.694 | 1.63  | 0.574 | -0.64 |
| 1458550_at   | Myo1d             | myosin ID                                                                           | -1.15 | 0.597 | -1.3  | 0.404 | -1.78 | 0.025 | 2.38  | 0.239 | -0.46 |
| 1419763_at   | 2610020O08Rik     | RIKEN cDNA 2610020O08 gene                                                          | -1.56 | 0.042 | -2.13 | 0.054 | 1.09  | 0.691 | -1.08 | 0.844 | -0.92 |
| 1430633_s_at | C430045I18Rik     | RIKEN cDNA C430045I18 gene                                                          | -1.44 | 0.213 | -1.44 | 0.294 | -1.23 | 0.288 | 1.44  | 0.166 | -0.67 |
| 1444046_at   | D430041B17Rik     | RIKEN cDNA D430041B17 gene                                                          | -1.76 | 0.115 | -1.7  | 0.128 | 1.04  | 0.917 | -1.01 | 0.969 | -0.86 |
| 1430899_at   | Muc5ac            | mucin 5, subtypes A and C, tracheobronchial/gastric                                 | -1.74 | 0.365 | -1.09 | 0.855 | -1.41 | 0.629 | 1.24  | 0.651 | -0.75 |
| 1455145_at   | ---               | 14, 17 days embryo head cDNA, RIKEN full-length enriched library, clone:32224C      | -1.14 | 0.47  | -1.37 | 0.256 | -1.68 | 0.034 | 2.09  | 0.076 | -0.53 |
| 1443892_at   | LOC435970 /// LOC | hypothetical LOC435970 /// similar to gonadotropin inducible ovarian transcrip      | -2.82 | 0.071 | -1.26 | 0.592 | 1.05  | 0.933 | -1.13 | 0.909 | -1.04 |
| 1456834_at   | Ibrdc2            | IBR domain containing 2                                                             | -1.82 | 0.503 | 1.24  | 0.569 | -2.45 | 0.081 | -1.1  | 0.795 | -1.03 |
| 1456102_a_at | Cul5              | cullin 5                                                                            | -1.11 | 0.486 | -1.17 | 0.494 | -2.25 | 0.018 | 1.05  | 0.884 | -0.87 |
| 1452859_at   | 1200016B10Rik     | RIKEN cDNA 1200016B10 gene                                                          | -1.28 | 0.03  | -1.27 | 0.051 | -1.57 | 0.037 | 1.21  | 0.475 | -0.73 |
| 1442412_at   | Dnahc9            | dynein, axonemal, heavy chain 9                                                     | -1.28 | 0.466 | -1.57 | 0.385 | -1.28 | 0.317 | 1.49  | 0.569 | -0.66 |
| 1447077_at   | Add3              | Adducin 3 (gamma)                                                                   | 1.2   | 0.838 | -2.88 | 0.021 | -1.53 | 0.137 | -1.57 | 0.114 | -1.2  |
| 1459129_at   | ---               | Adult male testis cDNA, RIKEN full-length enriched library, clone:4930548A09 pr     | -1.46 | 0.14  | -1.24 | 0.385 | -1.42 | 0.167 | 1.07  | 0.681 | -0.76 |
| 1445767_at   | Ptprd             | protein tyrosine phosphatase, receptor type, D                                      | 1.04  | 0.965 | -1.41 | 0.553 | -2.18 | 0.215 | -2.59 | 0.296 | -1.29 |
| 1453213_at   | Spata9            | spermatogenesis associated 9                                                        | -2.26 | 0.167 | -1.13 | 0.77  | -1.14 | 0.392 | 1.1   | 0.879 | -0.86 |
| 1449716_s_at | Nrd1              | nardilysin, N-arginine dibasic convertase, NRD convertase 1                         | -1.85 | 0.037 | -1.33 | 0.225 | -1.1  | 0.423 | 1.13  | 0.62  | -0.79 |
| 1437577_at   | ---               | ---                                                                                 | -1.27 | 0.146 | -1.19 | 0.08  | -1.75 | 0.002 | 1.1   | 0.393 | -0.78 |
| 1443715_at   | LOC380843 /// LOC | similar to RNA binding motif protein 24 /// similar to RNA binding motif protein 24 | -1.2  | 0.661 | -1.16 | 0.79  | -1.96 | 0.171 | 1.39  | 0.524 | -0.73 |
| 1419196_at   | Hamp1             | hepcidin antimicrobial peptide 1                                                    | -1.18 | 0.051 | -1.78 | 0.273 | -1.25 | 0.325 | 2.14  | 0.096 | -0.52 |
| 1458314_at   | Slc1a2            | Solute carrier family 1 (glial high affinity glutamate transporter), member 2       | -2.76 | 0.275 | -1.27 | 0.255 | 1.06  | 0.754 | -4.8  | 0.009 | -1.94 |
| 1459349_at   | A930011G23Rik     | RIKEN cDNA A930011G23 gene                                                          | -1.12 | 0.731 | -1.62 | 0.213 | -1.45 | 0.382 | 1.29  | 0.526 | -0.72 |
| 1439016_x_at | Sprr2a            | small proline-rich protein 2A                                                       | -1.46 | 0.146 | -1.88 | 0.02  | -1.01 | 0.94  | 1.21  | 0.223 | -0.79 |
| 1447241_at   | H2afy2            | H2A histone family, member Y2                                                       | -1.42 | 0.238 | -1.43 | 0.341 | -1.25 | 0.177 | 1.37  | 0.121 | -0.68 |
| 1458428_at   | Kcnt1             | potassium channel, subfamily T, member 1                                            | -1.58 | 0.013 | -1    | 0.992 | -1.74 | 0.142 | 1.15  | 0.502 | -0.79 |
| 1432739_at   | 2900060K15Rik     | RIKEN cDNA 2900060K15 gene                                                          | -2.46 | 0.112 | 1.05  | 0.947 | -1.33 | 0.4   | -2.57 | 0.252 | -1.33 |
| 1443589_at   | DXErt242e         | DNA segment, Chr X, ERATO Doi 242, expressed                                        | 1.23  | 0.633 | -1.63 | 0.388 | -2.82 | 0.083 | -1.26 | 0.199 | -1.12 |
| 1444067_at   | Pde1c             | phosphodiesterase 1C                                                                | -2.01 | 0.114 | -1.22 | 0.647 | -1.13 | 0.756 | 1.09  | 0.726 | -0.82 |
| 1420435_at   | 1700011A15Rik     | RIKEN cDNA 1700011A15 gene                                                          | -2.71 | 0.013 | -1.07 | 0.862 | -1.11 | 0.842 | 1.17  | 0.618 | -0.93 |
| 1445788_at   | Igf2bp1           | Insulin-like growth factor 2, binding protein 1                                     | -1.33 | 0.724 | -1.32 | 0.659 | -1.43 | 0.159 | 1.09  | 0.905 | -0.75 |
| 1438912_at   | Hdgfrp2           | hepatoma-derived growth factor, related protein 2                                   | -1.1  | 0.476 | -2.17 | 0.028 | -1.2  | 0.412 | 1.21  | 0.3   | -0.82 |
| 1430489_at   | 5430416G10Rik     | RIKEN cDNA 5430416G10 gene                                                          | -1.34 | 0.183 | -1.1  | 0.748 | -1.82 | 0.09  | 1.63  | 0.057 | -0.66 |
| 1423606_at   | Postn             | periostin, osteoblast specific factor                                               | -1.37 | 0.371 | 1.06  | 0.714 | -2.41 | 0.014 | -1.7  | 0.135 | -1.11 |
| 1434297_at   | E130304F04Rik     | RIKEN cDNA E130304F04 gene                                                          | -1.95 | 0.207 | -1.76 | 0.14  | 1.12  | 0.773 | -2.72 | 0.261 | -1.33 |
| 1446789_at   | Zcrb1             | Zinc finger CCHC-type and RNA binding motif 1                                       | -1.85 | 0.237 | -1.22 | 0.803 | -1.18 | 0.115 | 1.32  | 0.492 | -0.73 |

|              |               |                                                                                |       |       |       |       |       |       |       |       |       |
|--------------|---------------|--------------------------------------------------------------------------------|-------|-------|-------|-------|-------|-------|-------|-------|-------|
| 1429346_a_at | 4933440J22Rik | RIKEN cDNA 4933440J22 gene                                                     | -1.27 | 0.215 | -1.62 | 0.221 | -1.25 | 0.481 | 1.52  | 0.375 | -0.65 |
| 1436713_s_at | Gtl2          | GTL2, imprinted maternally expressed untranslated mRNA                         | -1.06 | 0.476 | -1.48 | 0.345 | -1.7  | 0.187 | 1.18  | 0.363 | -0.76 |
| 1432658_at   | 2810403D21Rik | RIKEN cDNA 2810403D21 gene                                                     | -2.19 | 0.54  | -2.39 | 0.297 | 1.33  | 0.515 | -2.62 | 0.358 | -1.47 |
| 1432040_at   | Kcnq1ot1      | KCNQ1 overlapping transcript 1                                                 | -1.61 | 0.023 | -1.39 | 0.134 | -1.16 | 0.393 | 1     | 0.995 | -0.79 |
| 1419197_x_at | Hamp1         | hepcidin antimicrobial peptide 1                                               | -1.29 | 0.432 | -1.77 | 0.284 | -1.16 | 0.393 | 2.27  | 0.007 | -0.49 |
| 1443587_at   | AK129128      | cDNA sequence AK129128                                                         | -1.48 | 0.711 | -1.98 | 0.35  | 1.03  | 0.964 | -2.2  | 0.222 | -1.16 |
| 1447673_x_at | 1700015C15Rik | RIKEN cDNA 1700015C15 gene                                                     | -1.2  | 0.301 | -1.36 | 0.631 | -1.56 | 0.301 | 1.59  | 0.015 | -0.63 |
| 1429669_at   | 4930488L21Rik | RIKEN cDNA 4930488L21 gene                                                     | -1.5  | 0.139 | -1.16 | 0.572 | -1.48 | 0.341 | 1.03  | 0.948 | -0.78 |
| 1453906_at   | Thrap2        | thyroid hormone receptor associated protein 2                                  | -1.27 | 0.476 | -1.38 | 0.514 | -1.44 | 0.2   | 1.06  | 0.851 | -0.76 |
| 1442730_at   | ---           | ---                                                                            | 1.15  | 0.508 | -2.42 | 0.243 | -1.56 | 0.461 | -1.67 | 0.199 | -1.13 |
| 1418683_at   | Lin7b         | lin-7 homolog B (C. elegans)                                                   | -1.44 | 0.746 | 1.04  | 0.89  | -2.11 | 0.058 | -2.95 | 0.107 | -1.37 |
| 1447065_at   | 9630041C05    | hypothetical protein 9630041C05                                                | -2.37 | 0.414 | -1.62 | 0.153 | 1.17  | 0.658 | -2.82 | 0.015 | -1.41 |
| 1441163_at   | Med12l        | mediator of RNA polymerase II transcription, subunit 12 homolog (yeast)-like   | -1.22 | 0.498 | -3.43 | 0.159 | 1.1   | 0.829 | -1.19 | 0.454 | -1.19 |
| 1429725_at   | Atbf1         | AT motif binding factor 1                                                      | -1.18 | 0.677 | -2.22 | 0.074 | -1.1  | 0.44  | 1.16  | 0.626 | -0.83 |
| 1459373_at   | Epb4.1        | Erythrocyte protein band 4.1                                                   | -1.12 | 0.712 | -1.34 | 0.286 | -1.75 | 0.184 | 3.04  | 0.239 | -0.29 |
| 1431868_at   | Akap4         | A kinase (PRKA) anchor protein 4                                               | -3.22 | 0.103 | -1.4  | 0.394 | 1.19  | 0.559 | -1.74 | 0.222 | -1.29 |
| 1427587_at   | Zfp28         | zinc finger protein 28                                                         | -1.24 | 0.087 | -2.67 | 0.075 | 1.03  | 0.913 | -1.1  | 0.745 | -0.99 |
| 1447340_at   | ---           | Adult male kidney cDNA, RIKEN full-length enriched library, clone:F530214C21 p | -1.55 | 0.29  | -1.18 | 0.319 | -1.39 | 0.052 | 1.09  | 0.843 | -0.76 |
| 1451647_at   | Slc24a1       | solute carrier family 24 (sodium/potassium/calcium exchanger), member 1        | -1.5  | 0.182 | -1.13 | 0.816 | -1.52 | 0.405 | 1.1   | 0.892 | -0.76 |
| 1459144_at   | Fndc3a        | Fibronectin type III domain containing 3a                                      | -1.21 | 0.357 | -1.51 | 0.099 | -1.38 | 0.028 | 1.15  | 0.712 | -0.74 |
| 1455228_at   | Whsc1         | Wolf-Hirschhorn syndrome candidate 1 (human)                                   | -1.44 | 0.096 | -1.24 | 0.043 | -1.41 | 0.005 | 1.34  | 0.385 | -0.69 |
| 1446035_at   | ---           | PREDICTED: Mus musculus similar to Protein CXorf22 (LOC629131), mRNA           | -3.35 | 0.067 | 1.3   | 0.635 | -1.63 | 0.214 | -3.07 | 0.129 | -1.69 |
| 1445427_at   | Nlk           | Nemo like kinase                                                               | 1.18  | 0.709 | -2.3  | 0.308 | -1.67 | 0.271 | -1.38 | 0.398 | -1.04 |
| 1459230_at   | D530025C14Rik | RIKEN cDNA B430319G15 gene                                                     | -1.17 | 0.233 | -1.67 | 0.057 | -1.32 | 0.14  | 1.85  | 0.257 | -0.58 |
| 1421702_at   | Rdh1          | retinol dehydrogenase 1 (all trans)                                            | -1.49 | 0.507 | -1.72 | 0.248 | -1.04 | 0.939 | 1.26  | 0.633 | -0.75 |
| 1419802_at   | Ccdc12        | coiled-coil domain containing 12                                               | -1.75 | 0.134 | -1.03 | 0.924 | -1.49 | 0.231 | 1.21  | 0.399 | -0.76 |
| 1455764_at   | B930007L02Rik | RIKEN cDNA B930007L02 gene                                                     | -1.69 | 0.209 | -1.38 | 0.643 | -1.12 | 0.358 | 1.15  | 0.65  | -0.76 |
| 1442293_at   | ---           | Transcribed locus                                                              | -1.41 | 0.108 | -1.69 | 0.121 | -1.1  | 0.585 | 1.33  | 0.414 | -0.72 |
| 1433338_at   | 6720460K10Rik | RIKEN cDNA 6720460K10 gene                                                     | -1.16 | 0.541 | -1.21 | 0.602 | -1.89 | 0.085 | 1.2   | 0.491 | -0.77 |
| 1418352_at   | Hsd17b2       | hydroxysteroid (17-beta) dehydrogenase 2                                       | 1.04  | 0.775 | -1.65 | 0.033 | -1.78 | 0.286 | -2.23 | 0.222 | -1.15 |
| 1451886_at   | Speg          | SPEG complex locus                                                             | -2.76 | 0.031 | -1.11 | 0.862 | -1.05 | 0.93  | 1.53  | 0.148 | -0.85 |
| 1456345_at   | A630057N01Rik | RIKEN cDNA A630057N01 gene                                                     | -1.43 | 0.455 | -1.11 | 0.841 | -1.64 | 0.305 | 1.47  | 0.25  | -0.68 |
| 1437940_at   | Apba1         | amyloid beta (A4) precursor protein binding, family A, member 1                | -1.46 | 0.306 | -1.4  | 0.279 | -1.23 | 0.15  | 1.31  | 0.35  | -0.69 |
| 1427808_at   | Nfya          | nuclear transcription factor-Y alpha                                           | -2.19 | 0.277 | -1.08 | 0.881 | -1.21 | 0.558 | 1.3   | 0.69  | -0.79 |
| 1458957_at   | LOC623548     | Similar to pyridoxal (pyridoxine, vitamin B6) kinase                           | 1.11  | 0.894 | -2.17 | 0.157 | -1.56 | 0.441 | -1.13 | 0.778 | -0.94 |
| 1449661_at   | Suz12         | Suppressor of zeste 12 homolog (Drosophila)                                    | -1.21 | 0.425 | -1.36 | 0.492 | -1.53 | 0.237 | 1.73  | 0.157 | -0.59 |
| 1420269_at   | Npm1          | Nucleophosmin 1                                                                | -1.86 | 0.207 | -1.05 | 0.87  | -1.37 | 0.51  | 2.17  | 0.143 | -0.53 |
| 1431991_at   | 2410004P03Rik | RIKEN cDNA 2410004P03 gene                                                     | -1.92 | 0.123 | -1.39 | 0.357 | -1.02 | 0.94  | 1.1   | 0.845 | -0.81 |
| 1436468_at   | Zdhhc8        | zinc finger, DHHC domain containing 8                                          | -2.33 | 0.066 | -1.61 | 0.258 | 1.17  | 0.226 | -1.53 | 0.033 | -1.08 |
| 1448381_at   | Gfm1          | G elongation factor, mitochondrial 1                                           | -1.29 | 0.404 | -1.35 | 0.072 | -1.44 | 0.002 | 1.24  | 0.448 | -0.71 |
| 1456960_at   | Adk           | Adenosine kinase                                                               | -1.23 | 0.351 | -1.19 | 0.327 | -1.77 | 0.009 | 1.38  | 0.322 | -0.7  |
| 1453642_at   | 6530411M01Rik | RIKEN cDNA 6530411M01 gene                                                     | -1.96 | 0.512 | -1.52 | 0.489 | 1.05  | 0.705 | -1.68 | 0.276 | -1.03 |
| 1439132_at   | Phf8          | PHD finger protein 8                                                           | -1.08 | 0.445 | -1.51 | 0.345 | -1.6  | 0.22  | 1.22  | 0.694 | -0.74 |
| 1433357_at   | 5730422E09Rik | RIKEN cDNA 5730422E09 gene                                                     | 1.16  | 0.028 | -1.72 | 0.397 | -2.11 | 0.066 | -1.3  | 0.274 | -0.99 |
| 1439691_at   | D5Ert579e     | DNA segment, Chr 5, ERATO Doi 579, expressed                                   | -1.31 | 0.06  | -1.36 | 0.217 | -1.39 | 0.065 | 1.36  | 0.193 | -0.67 |
| 1432210_at   | 4933401H06Rik | RIKEN cDNA 4933401H06 gene                                                     | -2.77 | 0.087 | -1    | 0.994 | -1.16 | 0.611 | 1.08  | 0.796 | -0.96 |
| 1436089_at   | Ints6         | integrator complex subunit 6                                                   | -1.78 | 0.003 | -1.17 | 0.141 | -1.25 | 0.135 | 1.28  | 0.49  | -0.73 |
| 1456921_at   | A2bp1         | Ataxin 2 binding protein 1                                                     | -1.09 | 0.904 | -1.3  | 0.182 | -1.88 | 0.269 | 1.12  | 0.855 | -0.79 |
| 1452858_at   | Elavl1        | ELAV (embryonic lethal, abnormal vision, Drosophila)-like 1 (Hu antigen R)     | -1.38 | 0.101 | -1.52 | 0.179 | -1.2  | 0.188 | 1.5   | 0.374 | -0.65 |
| 1447421_at   | ---           | Transcribed locus                                                              | -1.53 | 0.002 | 1.03  | 0.908 | -1.87 | 0.032 | -1.23 | 0.364 | -0.9  |
| 1434910_at   | ---           | ---                                                                            | -1.37 | 0.035 | -1.6  | 0.106 | -1.16 | 0.004 | 1.03  | 0.689 | -0.77 |
| 1455698_at   | Tloc1         | translocation protein 1                                                        | -1.13 | 0.606 | -1.42 | 0.18  | -1.6  | 0.141 | 1.15  | 0.625 | -0.75 |
| 1439449_at   | Satb1         | special AT-rich sequence binding protein 1                                     | -2.38 | 0.081 | 1.18  | 0.731 | -1.61 | 0.262 | -4.48 | 0.01  | -1.82 |

|              |                    |                                                                                                        |       |       |        |       |       |       |       |       |       |
|--------------|--------------------|--------------------------------------------------------------------------------------------------------|-------|-------|--------|-------|-------|-------|-------|-------|-------|
| 1447732_x_at | Peg3               | paternally expressed 3                                                                                 | -1.09 | 0.844 | -2.77  | 0.047 | -1.06 | 0.648 | 2.13  | 0.307 | -0.7  |
| 1458880_at   | ---                | ---                                                                                                    | 1.14  | 0.779 | -1.45  | 0.434 | -2.55 | 0.025 | -1.72 | 0.342 | -1.15 |
| 1433090_at   | ---                | ---                                                                                                    | -3.23 | 0.215 | -1.27  | 0.637 | 1.12  | 0.769 | -1.18 | 0.165 | -1.14 |
| 1438796_at   | ---                | ---                                                                                                    | -2.05 | 0.419 | 1.49   | 0.113 | -4.11 | 0.059 | -2.29 | 0.034 | -1.74 |
| 1443637_at   | 2900084M01Rik      | RIKEN cDNA 2900084M01 gene                                                                             | -1.29 | 0.597 | -2.21  | 0.177 | -1.01 | 0.985 | 1.24  | 0.721 | -0.82 |
| 1457925_at   | C530049I24Rik      | RIKEN cDNA C530049I24 gene                                                                             | -1.04 | 0.762 | -1.45  | 0.134 | -1.75 | 0.408 | 1.03  | 0.969 | -0.8  |
| 1444502_at   | Pet112l            | PET112-like (yeast)                                                                                    | -1.6  | 0.072 | -1.03  | 0.926 | -1.6  | 0.142 | 1.71  | 0.194 | -0.63 |
| 1427363_at   | Myo10              | Myosin X                                                                                               | -1.11 | 0.129 | -1.5   | 0.048 | -1.54 | 0.065 | 1.23  | 0.002 | -0.73 |
| 1436631_at   | 2010010M04Rik      | RIKEN cDNA 2010010M04 gene                                                                             | -1.06 | 0.457 | -1.35  | 0.105 | -1.89 | 0.009 | 1.12  | 0.258 | -0.79 |
| 1446537_at   | Ga17               | Dendritic cell protein GA17                                                                            | 1.24  | 0.365 | -1.71  | 0.123 | -2.55 | 0.001 | -1.53 | 0.232 | -1.14 |
| 1426035_at   | LOC574418          | hypothetical LOC574418                                                                                 | -1.06 | 0.947 | -1.37  | 0.492 | -1.84 | 0.076 | 1.55  | 0.457 | -0.68 |
| 1418547_at   | Tfpi2              | tissue factor pathway inhibitor 2                                                                      | -1.38 | 0.203 | 1.02   | 0.846 | -2.09 | 0.038 | -1.35 | 0.284 | -0.95 |
| 1450500_at   | Uhmk1 /// LOC6772  | U2AF homology motif (UHM) kinase 1 /// similar to U2AF homology motif (UHM) f                          | -1.27 | 0.657 | -1.84  | 0.159 | -1.12 | 0.783 | 1.79  | 0.167 | -0.61 |
| 1459878_a_at | A430107O13Rik      | RIKEN cDNA A430107O13 gene                                                                             | 1.25  | 0.349 | -2.14  | 0.025 | -1.99 | 0.047 | -1.1  | 0.628 | -0.99 |
| 1425369_a_at | Sox10              | SRY-box containing gene 10                                                                             | 1.13  | 0.489 | -1.53  | 0.075 | -2.29 | 0.291 | -1.43 | 0.221 | -1.03 |
| 1425839_at   | Fkbp11             | FK506 binding protein 11                                                                               | -1.84 | 0.307 | -1.32  | 0.65  | -1.09 | 0.836 | 1.37  | 0.166 | -0.72 |
| 1431925_at   | 4933433H22Rik      | RIKEN cDNA 4933433H22 gene                                                                             | -1.68 | 0.396 | -1.27  | 0.642 | -1.2  | 0.554 | 2.11  | 0.215 | -0.51 |
| 1443029_at   | Ppfibp1            | PTPRF interacting protein, binding protein 1 (liprin beta 1)                                           | -1.27 | 0.256 | -1.16  | 0.487 | -1.76 | 0.034 | 1.24  | 0.336 | -0.74 |
| 1428032_at   | Acvr1c             | activin A receptor, type IC                                                                            | -1.2  | 0.438 | -1.52  | 0.118 | -1.37 | 0.161 | 1.11  | 0.718 | -0.74 |
| 1436531_at   | Metap2             | methionine aminopeptidase 2                                                                            | -1.47 | 0.124 | -1.24  | 0.322 | -1.37 | 0.035 | 2.68  | 0.249 | -0.35 |
| 1439572_at   | ---                | ---                                                                                                    | 1.01  | 0.91  | -1.8   | 0.002 | -1.53 | 0.069 | -1.05 | 0.829 | -0.84 |
| 1437512_x_at | Ebna1bp2           | EBNA1 binding protein 2                                                                                | -1.97 | 0.2   | -1.41  | 0.208 | 1     | 0.992 | -1.19 | 0.438 | -0.89 |
| 1449067_at   | Slc2a2             | solute carrier family 2 (facilitated glucose transporter), member 2                                    | -1.12 | 0.438 | -1.43  | 0.337 | -1.6  | 0.246 | 1.16  | 0.867 | -0.75 |
| 1453184_at   | 2310040C09Rik      | RIKEN cDNA 2310040C09 gene                                                                             | 1.13  | 0.643 | -3.31  | 0.22  | -1.26 | 0.502 | -2.2  | 0.427 | -1.41 |
| 1431803_at   | Cyp2d13            | cytochrome P450, family 2, subfamily d, polypeptide 13                                                 | -1.25 | 0.442 | -1.84  | 0     | -1.14 | 0.724 | 1.02  | 0.964 | -0.8  |
| 1453102_at   | Flrt3              | fibronectin leucine rich transmembrane protein 3                                                       | 1.18  | 0.54  | -2.2   | 0.363 | -1.71 | 0.098 | -2.15 | 0.127 | -1.22 |
| 1433026_at   | ---                | ---                                                                                                    | -1.29 | 0.379 | -1.43  | 0.362 | -1.33 | 0.361 | 1.28  | 0.558 | -0.7  |
| 1433167_at   | 4930444E06Rik      | RIKEN cDNA 4930444E06 gene                                                                             | 1     | 0.987 | -2.47  | 0.114 | -1.23 | 0.418 | -1.26 | 0.294 | -0.99 |
| 1460316_at   | Acs1               | acyl-CoA synthetase long-chain family member 1                                                         | -1.31 | 0.057 | -1.9   | 0.017 | -1.07 | 0.729 | 1.55  | 0.108 | -0.68 |
| 1447785_x_at | D11Wsu99e          | DNA segment, Chr 11, Wayne State University 99, expressed                                              | -1.63 | 0.118 | -1.36  | 0.39  | -1.14 | 0.543 | 1.19  | 0.645 | -0.74 |
| 1440311_at   | Sorbs1             | sorbin and SH3 domain containing 1                                                                     | -1.23 | 0.65  | -1.2   | 0.454 | -1.74 | 0.208 | 1.63  | 0.232 | -0.64 |
| 1457389_at   | 9830166K06Rik      | RIKEN cDNA 9830166K06 gene                                                                             | -1.39 | 0.665 | -1.61  | 0.166 | -1.13 | 0.623 | 1.15  | 0.622 | -0.75 |
| 1436294_at   | Ankrd29            | ankyrin repeat domain 29                                                                               | 1     | 0.999 | -1.69  | 0.278 | -1.59 | 0.082 | -1.51 | 0.081 | -0.95 |
| 1460588_at   | ---                | 10 days lactation, adult female mammary gland cDNA, RIKEN full-length enriched                         | -1.33 | 0.483 | -1.75  | 0.076 | -1.11 | 0.631 | 1.01  | 0.972 | -0.8  |
| 1427290_at   | Krt81              | keratin 81                                                                                             | -1.52 | 0.099 | -1.28  | 0.177 | -1.27 | 0.284 | 1.38  | 0.07  | -0.67 |
| 1452677_at   | Pnpt1 /// LOC63555 | polyribonucleotide nucleotidyltransferase 1 /// similar to polyribonucleotide nucleotidyltransferase 1 | -2.57 | 0.189 | -1.4   | 0.39  | 1.12  | 0.773 | -1.04 | 0.933 | -0.97 |
| 1441055_at   | Paln2              | paralemmin 2                                                                                           | 1.1   | 0.901 | -1.92  | 0.175 | -1.65 | 0.031 | -1.18 | 0.718 | -0.91 |
| 1438583_at   | Ern1               | Endoplasmic reticulum (ER) to nucleus signalling 1                                                     | -1.2  | 0.416 | -1.31  | 0.072 | -1.58 | 0.086 | 1.29  | 0.017 | -0.7  |
| 1446454_at   | ---                | ---                                                                                                    | -1.13 | 0.899 | -2.33  | 0.275 | -1.09 | 0.803 | 1.49  | 0.289 | -0.77 |
| 1440157_at   | Scml4              | Sex comb on midleg-like 4 (Drosophila)                                                                 | 1.1   | 0.576 | -2.03  | 0.105 | -1.59 | 0.348 | -3.35 | 0.061 | -1.47 |
| 1436637_at   | Wbscr1             | Williams-Beuren syndrome chromosome region 1 homolog (human)                                           | -1.94 | 0.135 | -1.01  | 0.95  | -1.38 | 0.334 | 1.15  | 0.429 | -0.8  |
| 1416460_at   | Miox               | myo-inositol oxygenase                                                                                 | -1.15 | 0.22  | -12.46 | 0.211 | 1.27  | 0.74  | -3.06 | 0.351 | -3.85 |
| 1458598_at   | Peg13              | paternally expressed 13                                                                                | -2.39 | 0.223 | -1.36  | 0.647 | 1.07  | 0.82  | -1.02 | 0.82  | -0.93 |
| 1431841_at   | 4930434E21Rik      | RIKEN cDNA 4930434E21 gene                                                                             | -1.53 | 0.246 | -1.88  | 0.232 | 1.04  | 0.923 | -1.36 | 0.451 | -0.93 |
| 1446360_at   | Rora               | RAR-related orphan receptor alpha                                                                      | 1.05  | 0.93  | -1.12  | 0.829 | -3.47 | 0.041 | -2.17 | 0.208 | -1.43 |
| 1442034_at   | Fastkd1            | FAST kinase domains 1                                                                                  | -2.05 | 0.258 | -1.74  | 0.289 | 1.17  | 0.698 | -1.46 | 0.636 | -1.02 |
| 1454001_at   | ---                | ---                                                                                                    | -1.71 | 0.549 | -1.62  | 0.558 | 1.02  | 0.958 | -1.06 | 0.911 | -0.84 |
| 1444594_at   | Tbx3               | T-box 3                                                                                                | -1.15 | 0.668 | -1.3   | 0.331 | -1.7  | 0.055 | 1.19  | 0.413 | -0.74 |
| 1421788_x_at | Egfbp2             | epidermal growth factor binding protein type B                                                         | -1.25 | 0.699 | -2.2   | 0.02  | -1.03 | 0.927 | 2.06  | 0.097 | -0.61 |
| 1420385_at   | Gna14              | guanine nucleotide binding protein, alpha 14                                                           | -1.2  | 0.138 | -1.35  | 0.091 | -1.54 | 0.024 | 2.05  | 0.027 | -0.51 |
| 1429928_at   | 1700030B21Rik      | RIKEN cDNA 1700030B21 gene                                                                             | -1.19 | 0.631 | -3.6   | 0.105 | 1.11  | 0.578 | -1.73 | 0.315 | -1.35 |
| 1432437_at   | 4933413N12Rik      | RIKEN cDNA 4933413N12 gene                                                                             | -1.63 | 0.187 | -1.45  | 0.338 | -1.08 | 0.755 | 1.09  | 0.896 | -0.77 |
| 1447046_at   | Dnajb13            | DnaJ (Hsp40) related, subfamily B, member 13                                                           | -1.32 | 0.758 | -1.24  | 0.321 | -1.51 | 0.112 | 2.77  | 0.274 | -0.33 |

|              |               |                                                                              |       |       |       |       |       |       |       |       |       |
|--------------|---------------|------------------------------------------------------------------------------|-------|-------|-------|-------|-------|-------|-------|-------|-------|
| 1447604_at   | BC053393      | cDNA sequence BC053393                                                       | -1    | 0.986 | -2.41 | 0.163 | -1.23 | 0.423 | 1.06  | 0.872 | -0.9  |
| 1430204_at   | 5033425G24Rik | RIKEN cDNA 5033425G24 gene                                                   | 1.04  | 0.616 | -1.36 | 0.311 | -2.22 | 0.039 | -1.17 | 0.589 | -0.93 |
| 1446933_at   | ---           | ---                                                                          | -1.3  | 0.443 | -1.27 | 0.407 | -1.48 | 0.076 | 1.02  | 0.921 | -0.76 |
| 1458897_at   | Ust           | uronyl-2-sulfotransferase                                                    | -1.76 | 0.1   | -1.15 | 0.377 | -1.26 | 0.122 | 1.05  | 0.892 | -0.78 |
| 1458323_at   | 4930444A19Rik | RIKEN cDNA 4930444A19 gene                                                   | -1.13 | 0.79  | -1.19 | 0.604 | -1.98 | 0.272 | 1.67  | 0.423 | -0.66 |
| 1422173_at   | lpf1          | insulin promoter factor 1, homeodomain transcription factor                  | -3.61 | 0.016 | -1.04 | 0.915 | -1.01 | 0.957 | 2.11  | 0.167 | -0.89 |
| 1453965_at   | 4930432O09Rik | RIKEN cDNA 4930432O09 gene                                                   | -1.7  | 0.219 | 1     | 0.999 | -1.56 | 0.232 | -1.32 | 0.61  | -0.9  |
| 1436304_at   | C030003D03Rik | RIKEN cDNA C030003D03 gene                                                   | -1.17 | 0.825 | -1.65 | 0.48  | -1.31 | 0.45  | 2.7   | 0.109 | -0.36 |
| 1444495_at   | ---           | ---                                                                          | -1.37 | 0.205 | -1.02 | 0.964 | -1.92 | 0.066 | 1.3   | 0.753 | -0.75 |
| 1431216_s_at | Dnajc6        | DnaJ (Hsp40) homolog, subfamily C, member 6                                  | 1.15  | 0.468 | -1.29 | 0.691 | -3.25 | 0.221 | -1.76 | 0.129 | -1.29 |
| 1444856_at   | Crebbp        | CREB binding protein                                                         | 1.03  | 0.885 | -1.72 | 0.055 | -1.6  | 0.03  | -1.46 | 0.148 | -0.94 |
| 1429812_at   | 2610002D18Rik | RIKEN cDNA 2610002D18 gene                                                   | -1.03 | 0.9   | -1.67 | 0.369 | -1.51 | 0.201 | 2.25  | 0.247 | -0.49 |
| 1420676_at   | Sprrl3        | small proline rich-like 3                                                    | -1.49 | 0.425 | -1.5  | 0.515 | -1.12 | 0.799 | 2.47  | 0.366 | -0.41 |
| 1458340_at   | ---           | Transcribed locus                                                            | -1.54 | 0.492 | -2.62 | 0.112 | 1.2   | 0.641 | -1.77 | 0.218 | -1.18 |
| 1446982_at   | Pard3         | Par-3 (partitioning defective 3) homolog (C. elegans)                        | -1.22 | 0.375 | -1.09 | 0.729 | -2.04 | 0.004 | 1.02  | 0.933 | -0.83 |
| 1440008_at   | 2310043L19Rik | RIKEN cDNA 2310043L19 gene                                                   | -1.37 | 0.354 | 1     | 0.998 | -2    | 0.129 | -2.65 | 0.22  | -1.26 |
| 1438344_at   | 4833424O15Rik | RIKEN cDNA 4833424O15 gene                                                   | -1.63 | 0.625 | 1.06  | 0.847 | -1.79 | 0.215 | -2.27 | 0.017 | -1.16 |
| 1437655_at   | D430020J02Rik | RIKEN cDNA D430020J02 gene                                                   | -1.12 | 0.815 | -1.56 | 0.266 | -1.43 | 0.544 | 1.01  | 0.987 | -0.78 |
| 1443175_at   | A830010M09Rik | RIKEN cDNA A830010M09 gene                                                   | -1.98 | 0.305 | -1.63 | 0.435 | 1.11  | 0.807 | -2.04 | 0.306 | -1.13 |
| 1439684_at   | 4930570G19Rik | RIKEN cDNA 4930570G19 gene                                                   | -1.13 | 0.89  | -2.31 | 0.027 | -1.1  | 0.816 | 1.53  | 0.498 | -0.75 |
| 1459812_x_at | Tspan7        | tetraspanin 7                                                                | -1.6  | 0.309 | -1.38 | 0.482 | -1.13 | 0.766 | 1.37  | 0.544 | -0.69 |
| 1455745_at   | Cln8          | ceroid-lipofuscinosis, neuronal 8                                            | -1.43 | 0.444 | -1.47 | 0.086 | -1.18 | 0.311 | 2.78  | 0.109 | -0.32 |
| 1459100_at   | AU015253      | expressed sequence AU015253                                                  | -1.68 | 0.28  | -1.09 | 0.829 | -1.39 | 0.113 | 1.05  | 0.913 | -0.78 |
| 1430529_at   | Csnk1a1       | casein kinase 1, alpha 1                                                     | -1.17 | 0.34  | -1.61 | 0.067 | -1.32 | 0.178 | 1.1   | 0.501 | -0.75 |
| 1435435_at   | Cttnbp2       | cortactin binding protein 2                                                  | -1.14 | 0.489 | -1.06 | 0.92  | -2.42 | 0.185 | 1.07  | 0.208 | -0.89 |
| 1421674_at   | ---           | ---                                                                          | -1.16 | 0.809 | -1.25 | 0.443 | -1.74 | 0.27  | 1.51  | 0.54  | -0.66 |
| 1456082_x_at | Cct4          | chaperonin subunit 4 (delta)                                                 | -1.3  | 0.303 | -1.36 | 0.234 | -1.37 | 0.21  | 1.12  | 0.524 | -0.73 |
| 1457099_at   | D030011O10Rik | RIKEN cDNA D030011O10 gene                                                   | -1.56 | 0.134 | -2.08 | 0.072 | 1.11  | 0.502 | -1.43 | 0.326 | -0.99 |
| 1459493_at   | Setbp1        | SET binding protein 1                                                        | 1.01  | 0.878 | -1.56 | 0.55  | -1.72 | 0.017 | -1.22 | 0.062 | -0.87 |
| 1446888_at   | ---           | ---                                                                          | -1.42 | 0.765 | -1.07 | 0.899 | -1.68 | 0.25  | 1.83  | 0.277 | -0.59 |
| 1442267_at   | Stxbp4        | syntaxin binding protein 4                                                   | -1.05 | 0.891 | -1.15 | 0.664 | -2.44 | 0.08  | 2.67  | 0.19  | -0.49 |
| 1443056_at   | Ptprd         | Protein tyrosine phosphatase, receptor type, D                               | 1     | 0.991 | -1.41 | 0.128 | -1.91 | 0.099 | -1.5  | 0.298 | -0.96 |
| 1436837_at   | Mael          | maelstrom homolog (Drosophila)                                               | -1.07 | 0.909 | -1.74 | 0.341 | -1.38 | 0.372 | 1.14  | 0.558 | -0.76 |
| 1426712_at   | Slc6a15       | solute carrier family 6 (neurotransmitter transporter), member 15            | -1.27 | 0.141 | -1.85 | 0.314 | -1.11 | 0.66  | 1.17  | 0.692 | -0.76 |
| 1436692_at   | ---           | 12 days embryo head cDNA, RIKEN full-length enriched library, clone:3000003N | -1.32 | 0.205 | -1.12 | 0.602 | -1.73 | 0.008 | 1.07  | 0.666 | -0.77 |
| 1450045_at   | Srrm1         | serine/arginine repetitive matrix 1                                          | -1.22 | 0.11  | -1.4  | 0.01  | -1.43 | 0.038 | 1.1   | 0.649 | -0.74 |
| 1443663_at   | Prkg1         | Protein kinase, cGMP-dependent, type I                                       | -1.34 | 0.469 | 1.04  | 0.823 | -2.26 | 0.006 | -1.69 | 0.456 | -1.06 |
| 1424881_at   | Trib1         | tribbles homolog 1 (Drosophila)                                              | -1.29 | 0.313 | -1.62 | 0.107 | -1.18 | 0.453 | 1.62  | 0.308 | -0.62 |
| 1457947_at   | Ddx49         | DEAD (Asp-Glu-Ala-Asp) box polypeptide 49                                    | -1.72 | 0.14  | -1.48 | 0.65  | -1.02 | 0.93  | 1.34  | 0.479 | -0.72 |
| 1430438_at   | 8430439J12Rik | RIKEN cDNA 8430439J12 gene                                                   | -1.41 | 0.35  | -1.3  | 0.152 | -1.32 | 0.129 | 1.07  | 0.69  | -0.74 |
| 1445452_at   | Traf1         | Tnf receptor-associated factor 1                                             | 1.14  | 0.566 | -2.01 | 0.242 | -1.66 | 0.043 | -1.97 | 0.143 | -1.13 |
| 1438690_at   | Tyms          | Thymidylate synthase                                                         | -1.31 | 0.119 | -1.19 | 0.661 | -1.59 | 0.262 | 4.17  | 0.186 | 0.02  |
| 1446503_at   | ---           | ---                                                                          | -1.8  | 0.05  | -1.76 | 0.183 | 1.11  | 0.724 | -1.33 | 0.224 | -0.94 |
| 1438495_at   | Top1          | topoisomerase (DNA) I                                                        | -1.32 | 0.036 | -1.31 | 0.221 | -1.39 | 0.174 | 1.79  | 0.139 | -0.56 |
| 1421453_at   | Jph2          | junctophilin 2                                                               | -1.33 | 0.202 | -1.51 | 0.606 | -1.21 | 0.508 | 1.18  | 0.252 | -0.72 |
| 1446361_at   | Gprk5         | G protein-coupled receptor kinase 5                                          | -1.35 | 0.024 | -1.22 | 0.719 | -1.48 | 0.218 | 1.14  | 0.415 | -0.73 |
| 1429844_at   | 2310043J07Rik | RIKEN cDNA 2310043J07 gene                                                   | -1.82 | 0.152 | -2.41 | 0.056 | 1.27  | 0.631 | -1.15 | 0.816 | -1.03 |
| 1448397_at   | Gjb6          | gap junction membrane channel protein beta 6                                 | -1.69 | 0.335 | -1.32 | 0.46  | -1.13 | 0.707 | 1.05  | 0.822 | -0.77 |
| 1418689_at   | Cts6          | cathepsin 6                                                                  | -1.95 | 0.433 | -1.2  | 0.674 | -1.12 | 0.696 | 1.45  | 0.292 | -0.71 |
| 1459167_at   | Cdc42bpb      | Cdc42 binding protein kinase beta                                            | -1.13 | 0.431 | -1.55 | 0.19  | -1.41 | 0.342 | 1.05  | 0.923 | -0.76 |
| 1441871_at   | 1810044D09Rik | RIKEN cDNA 1810044D09 gene                                                   | -2.41 | 0.002 | -1.18 | 0.414 | -1.02 | 0.892 | 1.23  | 0.457 | -0.85 |
| 1450192_at   | Lhcgr         | luteinizing hormone/choriogonadotropin receptor                              | 1.02  | 0.966 | -1.36 | 0.591 | -2.09 | 0.278 | -1.82 | 0.57  | -1.06 |
| 1459192_at   | ---           | Transcribed locus                                                            | -1.45 | 0.318 | -1.72 | 0.365 | -1.03 | 0.943 | 1.19  | 0.674 | -0.75 |

|              |                   |                                                                                        |       |       |       |       |       |       |       |       |       |
|--------------|-------------------|----------------------------------------------------------------------------------------|-------|-------|-------|-------|-------|-------|-------|-------|-------|
| 1453918_at   | 4933426F18Rik     | RIKEN cDNA 4933426F18 gene                                                             | 1.03  | 0.95  | -2.62 | 0.178 | -1.2  | 0.735 | -3.07 | 0.152 | -1.47 |
| 1416682_at   | Ube3a             | ubiquitin protein ligase E3A                                                           | -1.48 | 0.147 | -1.18 | 0.652 | -1.41 | 0.141 | 1.06  | 0.629 | -0.75 |
| 1442651_at   | Wwox              | WW domain-containing oxidoreductase                                                    | 1.06  | 0.846 | -1.88 | 0.074 | -1.54 | 0.115 | -1.29 | 0.555 | -0.91 |
| 1421850_at   | Mtap1b            | microtubule-associated protein 1 B                                                     | -1.78 | 0.173 | -1.33 | 0.423 | -1.08 | 0.752 | 1.03  | 0.966 | -0.79 |
| 1442625_at   | Plekhc1           | Pleckstrin homology domain containing, family C (with FERM domain) member 1            | -1.01 | 0.986 | -1.28 | 0.037 | -2.16 | 0.037 | 1.01  | 0.986 | -0.86 |
| 1440307_at   | Gtf3c2            | general transcription factor IIIC, polypeptide 2, beta                                 | 1.06  | 0.63  | -1.77 | 0.02  | -1.62 | 0.201 | -1.51 | 0.05  | -0.96 |
| 1440220_at   | AI503564          | expressed sequence AI503564                                                            | -1.13 | 0.378 | -1.4  | 0.009 | -1.57 | 0.009 | 1.52  | 0.015 | -0.64 |
| 1450805_at   | Sgcd              | sarcoglycan, delta (dystrophin-associated glycoprotein)                                | -1.88 | 0.172 | -1.13 | 0.83  | -1.21 | 0.08  | 1.93  | 0.06  | -0.57 |
| 1426595_at   | Slc18a1           | solute carrier family 18 (vesicular monoamine), member 1                               | -1.43 | 0.21  | -1.14 | 0.434 | -1.51 | 0.305 | 1.78  | 0.157 | -0.57 |
| 1446956_at   | BC004022          | cDNA sequence BC004022                                                                 | -1.25 | 0.344 | 1.02  | 0.875 | -2.42 | 0.226 | -1.11 | 0.771 | -0.94 |
| 1453528_at   | Lta4h             | leukotriene A4 hydrolase                                                               | 1.1   | 0.858 | -2.59 | 0.196 | -1.32 | 0.426 | -1.61 | 0.114 | -1.11 |
| 1446456_at   | ---               | 0 day neonate eyeball cDNA, RIKEN full-length enriched library, clone:E130003Jl        | -1.84 | 0.25  | -2.92 | 0.117 | 1.35  | 0.304 | -1.73 | 0.173 | -1.28 |
| 1457682_at   | 9030420J04Rik     | RIKEN cDNA 9030420J04 gene                                                             | 1.02  | 0.91  | -1.18 | 0.147 | -2.64 | 0.009 | -1.22 | 0.53  | -1.01 |
| 1451662_x_at | Akap4             | A kinase (PRKA) anchor protein 4                                                       | -1.68 | 0.332 | -1.51 | 0.462 | -1.02 | 0.947 | 1.97  | 0.254 | -0.56 |
| 1442691_at   | ---               | 0 day neonate lung cDNA, RIKEN full-length enriched library, clone:E030049N05          | -1.32 | 0.266 | -1.26 | 0.146 | -1.45 | 0.148 | 1.03  | 0.904 | -0.75 |
| 1435345_at   | Ceecam1           | cerebral endothelial cell adhesion molecule 1                                          | -1.81 | 0.043 | -1.28 | 0.371 | -1.11 | 0.211 | 3.35  | 0.153 | -0.21 |
| 1430107_at   | 9230116B18Rik     | RIKEN cDNA 9230116B18 gene                                                             | -1.18 | 0.738 | -1.41 | 0.244 | -1.47 | 0.167 | 1.23  | 0.732 | -0.71 |
| 1431884_at   | 1110019B22Rik     | RIKEN cDNA 1110019B22 gene                                                             | 1.03  | 0.969 | -2.19 | 0.279 | -1.34 | 0.59  | -1.57 | 0.496 | -1.01 |
| 1430894_at   | 5530401N12Rik     | RIKEN cDNA 5530401N12 gene                                                             | -2.21 | 0.198 | -1.58 | 0.284 | 1.15  | 0.659 | -2.18 | 0.29  | -1.2  |
| 1454279_at   | Oaz3              | ornithine decarboxylase antizyme 3                                                     | -1.66 | 0.631 | -1.29 | 0.687 | -1.16 | 0.768 | 1.73  | 0.4   | -0.6  |
| 1451966_at   | Mrap              | melanocortin 2 receptor accessory protein                                              | 1.03  | 0.97  | -1.87 | 0.044 | -1.47 | 0.34  | -2.5  | 0.299 | -1.2  |
| 1427607_at   | Cacna1h           | calcium channel, voltage-dependent, T type, alpha 1H subunit                           | -1.39 | 0.045 | -1.85 | 0.308 | -1.02 | 0.97  | 1.48  | 0.583 | -0.7  |
| 1443839_at   | 1700010H22Rik     | RIKEN cDNA 1700010H22 gene                                                             | -1.19 | 0.622 | -1.81 | 0.372 | -1.17 | 0.171 | 1.15  | 0.527 | -0.76 |
| 1440993_at   | AW111846          | Expressed sequence AW111846                                                            | -1.2  | 0.068 | -1.32 | 0.213 | -1.54 | 0.31  | 1.9   | 0.277 | -0.54 |
| 1432700_at   | 2810047J09Rik     | RIKEN cDNA 2810047J09 gene                                                             | -2.65 | 0     | -1.05 | 0.919 | -1.09 | 0.864 | 1.11  | 0.872 | -0.92 |
| 1437062_s_at | Phyhlpl           | phytanoyl-CoA hydroxylase interacting protein-like                                     | 1.07  | 0.423 | -2.23 | 0.22  | -1.38 | 0.355 | -2.43 | 0.043 | -1.24 |
| 1438588_at   | Plagl1            | Pleiomorphic adenoma gene-like 1                                                       | -1.43 | 0.44  | -1.41 | 0.332 | -1.2  | 0.444 | 1.63  | 0.167 | -0.6  |
| 1445938_at   | 5930427L02Rik     | RIKEN cDNA 5930427L02 gene                                                             | 1.15  | 0.7   | -1.3  | 0.753 | -3.12 | 0.011 | -2.09 | 0.372 | -1.34 |
| 1435851_at   | Lgi1              | leucine-rich repeat LGI family, member 1                                               | -1.16 | 0.675 | -1.94 | 0.341 | -1.15 | 0.705 | 1.3   | 0.647 | -0.74 |
| 1438676_at   | Mpa2l /// LOC6265 | macrophage activation 2 like /// similar to macrophage activation 2 like /// similar t | -1.31 | 0.309 | -2.15 | 0.035 | 1.01  | 0.957 | -1.39 | 0.003 | -0.96 |
| 1456989_at   | Oxgr1             | oxoglutarate (alpha-ketoglutarate) receptor 1                                          | -1.38 | 0.277 | -1.48 | 0.307 | -1.19 | 0.657 | 1.98  | 0.08  | -0.52 |
| 1454470_at   | 4930404F17Rik     | RIKEN cDNA 4930404F17 gene                                                             | -1.25 | 0.219 | -1.38 | 0.645 | -1.39 | 0.481 | 1.64  | 0.271 | -0.6  |
| 1458980_at   | ---               | ---                                                                                    | 1.05  | 0.897 | -1.47 | 0.552 | -1.95 | 0.083 | -1.06 | 0.811 | -0.86 |
| 1442743_at   | ---               | Adult male olfactory brain cDNA, RIKEN full-length enriched library, clone:643055      | -1.42 | 0.025 | -1.41 | 0.016 | -1.2  | 0.145 | 1.22  | 0.495 | -0.7  |
| 1458552_at   | D430050E20Rik     | RIKEN cDNA D430050E20 gene                                                             | -1.52 | 0.007 | -1.79 | 0.059 | 1.03  | 0.903 | -1.5  | 0.174 | -0.95 |
| 1443145_at   | Apbb1ip           | amyloid beta (A4) precursor protein-binding, family B, member 1 interacting prote      | -1.64 | 0.33  | -1.43 | 0.075 | -1.07 | 0.748 | 1.09  | 0.69  | -0.76 |
| 1454025_at   | Ddo               | D-aspartate oxidase                                                                    | -2.63 | 0.291 | -1.63 | 0.369 | 1.25  | 0.065 | -1    | 0.996 | -1    |
| 1437393_at   | AI875142          | expressed sequence AI875142                                                            | -1.44 | 0.011 | -1.22 | 0.156 | -1.36 | 0.134 | 1.07  | 0.415 | -0.74 |
| 1444554_at   | Tnrc6b            | Trinucleotide repeat containing 6b                                                     | -1.54 | 0.141 | -1.42 | 0.558 | -1.12 | 0.674 | 1.35  | 0.067 | -0.68 |
| 1427018_at   | Tsnaxip1          | translin-associated factor X (Tsnax) interacting protein 1                             | -1.18 | 0.742 | -1.59 | 0.628 | -1.3  | 0.316 | 1.32  | 0.465 | -0.69 |
| 1427286_at   | D11Bwg0517e       | DNA segment, Chr 11, Brigham & Women's Genetics 0517 expressed                         | -1.41 | 0.213 | 1.13  | 0.619 | -2.45 | 0.143 | -1.06 | 0.931 | -0.95 |
| 1445495_at   | ---               | ---                                                                                    | -1.77 | 0.118 | -1.51 | 0.351 | 1.02  | 0.938 | -2.26 | 0.013 | -1.13 |
| 1447809_x_at | ---               | ---                                                                                    | -1.14 | 0.621 | -1.67 | 0.154 | -1.29 | 0.496 | 1.9   | 0.355 | -0.55 |
| 1453730_at   | Samd8             | sterile alpha motif domain containing 8                                                | -1.47 | 0.069 | -1.35 | 0.544 | -1.22 | 0.588 | 1.4   | 0.265 | -0.66 |
| 1434200_at   | BC010981          | cDNA sequence BC010981                                                                 | -1.29 | 0.453 | -1.32 | 0.316 | -1.4  | 0.038 | 1.17  | 0.545 | -0.71 |
| 1453215_at   | Rnase10           | ribonuclease, RNase A family, 10 (non-active)                                          | 1.12  | 0.779 | -1.47 | 0.107 | -2.25 | 0.028 | -1    | 0.997 | -0.9  |
| 1440762_at   | Syn2              | synapsin II                                                                            | -1.35 | 0.675 | -1.33 | 0.669 | -1.33 | 0.403 | 1.54  | 0.483 | -0.62 |
| 1456972_at   | C80256            | expressed sequence C80256                                                              | -1.42 | 0.599 | -1.12 | 0.822 | -1.54 | 0.084 | 1.39  | 0.5   | -0.67 |
| 1453563_at   | Nmr1              | NmrA-like family domain containing 1                                                   | 1.05  | 0.946 | -1.86 | 0.12  | -1.51 | 0.148 | -1.08 | 0.788 | -0.85 |
| 1444667_at   | Brdt              | bromodomain, testis-specific                                                           | 1.16  | 0.635 | -2.88 | 0.009 | -1.35 | 0.346 | -1.13 | 0.847 | -1.05 |
| 1450375_at   | Pspn              | persephin                                                                              | -1.31 | 0.346 | -1.26 | 0.538 | -1.45 | 0.195 | 1.13  | 0.833 | -0.72 |
| 1441852_x_at | Atg16l1           | autophagy-related 16-like 1 (yeast)                                                    | -1.29 | 0.797 | -2.11 | 0.012 | -1    | 0.995 | 1.18  | 0.723 | -0.8  |
| 1425658_at   | Cd109             | CD109 antigen                                                                          | 1.27  | 0.735 | -1.76 | 0.108 | -2.43 | 0.043 | -1.48 | 0.577 | -1.1  |

|              |                   |                                                                                   |       |       |       |       |       |       |       |         |       |
|--------------|-------------------|-----------------------------------------------------------------------------------|-------|-------|-------|-------|-------|-------|-------|---------|-------|
| 1446593_at   | Trio              | Triple functional domain (PTRF interacting)                                       | 1.1   | 0.738 | -1.44 | 0.043 | -2.22 | 0.009 | -1.17 | 0.667   | -0.93 |
| 1427425_at   | 9130208E07Rik     | RIKEN cDNA 9130208E07 gene                                                        | -1.13 | 0.457 | -1.33 | 0.098 | -1.63 | 0.012 | 3.02  | 0.234   | -0.27 |
| 1428983_at   | Scx               | scleraxis                                                                         | -1.4  | 0.612 | -1.01 | 0.983 | -1.84 | 0.038 | 1.01  | 0.974   | -0.81 |
| 1459368_at   | ---               | ---                                                                               | -1.25 | 0.586 | -1.19 | 0.842 | -1.65 | 0.321 | 1.2   | 0.602   | -0.72 |
| 1448819_at   | Eif2s2            | eukaryotic translation initiation factor 2, subunit 2 (beta)                      | -1.12 | 0.129 | -1.33 | 0.008 | -1.65 | 0.077 | 1.3   | 0.259   | -0.7  |
| 1459076_at   | BC052040          | CDNA sequence BC052040                                                            | 1.12  | 0.609 | -2.39 | 0.014 | -1.4  | 0.206 | -1.03 | 0.956   | -0.93 |
| 1441001_at   | AI225934          | expressed sequence AI225934                                                       | 1.37  | 0.158 | -1.78 | 0.008 | -3.1  | 0.028 | -1.02 | 0.934   | -1.13 |
| 1457800_at   | 2900019G14Rik     | RIKEN cDNA 2900019G14 gene                                                        | -1.81 | 0.033 | -1.07 | 0.611 | -1.3  | 0.369 | 1.57  | 0.2     | -0.65 |
| 1442265_at   | Fancc             | Fanconi anemia, complementation group C                                           | -1.5  | 0.092 | -1.53 | 0.383 | -1.07 | 0.654 | 1.37  | 0.437   | -0.69 |
| 1442603_at   | Pb1               | Polybromo 1                                                                       | -1.09 | 0.743 | -1.22 | 0.529 | -1.94 | 0.087 | 1.3   | 0.321   | -0.74 |
| 1459179_at   | D8Ert268e         | DNA segment, Chr 8, ERATO Doi 268, expressed                                      | -1.46 | 0.616 | -1.21 | 0.722 | -1.36 | 0.625 | 3.39  | 0.343   | -0.16 |
| 1421539_at   | Zic4              | zinc finger protein of the cerebellum 4                                           | -1.67 | 0.404 | -1.02 | 0.898 | -1.48 | 0.338 | 1.7   | 0.394   | -0.62 |
| 1445277_at   | ---               | 16 days neonate thymus cDNA, RIKEN full-length enriched library, clone:A13000     | 1.03  | 0.854 | -1.34 | 0.318 | -2.11 | 0.024 | -2.46 | 0.025   | -1.22 |
| 1440079_at   | 3632454L22Rik     | RIKEN cDNA 3632454L22 gene                                                        | -1.59 | 0.63  | -1.11 | 0.817 | -1.38 | 0.056 | 1.31  | 0.327   | -0.69 |
| 1440474_at   | ---               | ---                                                                               | -2.08 | 0.092 | -1.54 | 0.266 | 1.12  | 0.826 | -1.66 | 0.346   | -1.04 |
| 1442641_at   | Ankhd1            | Ankyrin repeat and KH domain containing 1                                         | -1.12 | 0.616 | -1.5  | 0.111 | -1.44 | 0.16  | 1.09  | 0.714   | -0.74 |
| 1427328_a_at | Clasp2            | CLIP associating protein 2                                                        | -1.77 | 0.16  | -1.44 | 0.368 | -1    | 0.992 | 1.79  | 0.533   | -0.61 |
| 1459851_x_at | Rio1              | RIO kinase 1 (yeast)                                                              | -1.22 | 0.151 | -2.34 | 0.04  | 1.01  | 0.981 | -1.07 | 0.858   | -0.91 |
| 1420416_at   | Sema3a            | sema domain, immunoglobulin domain (Ig), short basic domain, secreted, (sema3a)   | 1.04  | 0.811 | -1.86 | 0.332 | -1.48 | 0.025 | -1.09 | 0.71    | -0.85 |
| 1454414_at   | Btdb7             | BTB (POZ) domain containing 7                                                     | -1.11 | 0.734 | -1.17 | 0.672 | -2    | 0.154 | 1.22  | 0.178   | -0.77 |
| 1436985_at   | Zfp644            | zinc finger protein 644                                                           | -1.02 | 0.964 | -1.5  | 0.324 | -1.67 | 0.018 | 1.28  | 0.454   | -0.73 |
| 1424691_at   | 5930434B04Rik     | RIKEN cDNA 5930434B04 gene                                                        | -2.02 | 0.208 | 1.18  | 0.408 | -1.73 | 0.16  | -1.52 | 0.523   | -1.02 |
| 1446418_at   | Atg7              | Autophagy-related 7 (yeast)                                                       | -1.28 | 0.286 | -1.34 | 0.169 | -1.37 | 0.047 | 1.1   | 0.307   | -0.72 |
| 1444372_at   | Arcn1             | Archain 1                                                                         | 1.03  | 0.936 | -1.61 | 0.088 | -1.65 | 0.09  | -1.37 | 0.372   | -0.9  |
| 1443195_at   | ---               | ---                                                                               | -1.11 | 0.71  | -1.22 | 0.655 | -1.88 | 0.063 | 1.56  | 0.123   | -0.66 |
| 1422238_at   | Usmg1             | upregulated during skeletal muscle growth 1                                       | -1.44 | 0.446 | -3.55 | 0.007 | 1.27  | 0.096 | -1.07 | 0.641   | -1.19 |
| 1427517_at   | Boc               | biregional cell adhesion molecule-related/down-regulated by oncogenes (Cdon) b    | -1.07 | 0.889 | -1.69 | 0.263 | -1.38 | 0.249 | 2.57  | 0.067   | -0.39 |
| 1439183_at   | Asah3             | N-acylsphingosine amidohydrolase (alkaline ceramidase) 3                          | -1.29 | 0.699 | -1.46 | 0.637 | -1.26 | 0.55  | 1.37  | #DIV/0! | -0.66 |
| 1454311_at   | ---               | ---                                                                               | 1.02  | 0.904 | -1.89 | 0.021 | -1.42 | 0.037 | -1.48 | 0.084   | -0.94 |
| 1417577_at   | Trpc3             | transient receptor potential cation channel, subfamily C, member 3                | -1.2  | 0.422 | -1.51 | 0.354 | -1.31 | 0.514 | 1.51  | 0.055   | -0.63 |
| 1438066_at   | Gtf2b             | General transcription factor IIB                                                  | 1.34  | 0.744 | -4.49 | 0     | -1.45 | 0.312 | -1.89 | 0.228   | -1.62 |
| 1444319_at   | E2f8              | E2F transcription factor 8                                                        | -1.17 | 0.585 | -1.85 | 0.198 | -1.16 | 0.6   | 2.55  | 0.388   | -0.41 |
| 1430942_at   | 8430437O03Rik     | RIKEN cDNA 8430437O03 gene                                                        | -1.21 | 0.195 | -1.28 | 0.193 | -1.55 | 0.095 | 1.35  | 0.282   | -0.67 |
| 1430113_at   | 4933424C13Rik     | RIKEN cDNA 4933424C13 gene                                                        | -1.14 | 0.864 | -1.46 | 0.392 | -1.45 | 0.564 | 1.06  | 0.928   | -0.75 |
| 1433255_at   | 8430437B07Rik     | RIKEN cDNA 8430437B07 gene                                                        | -1.28 | 0.438 | -1.32 | 0.665 | -1.4  | 0.063 | 1.27  | 0.118   | -0.68 |
| 1446059_at   | St6galnac5        | ST6 (alpha-N-acetyl-neuraminy-2,3-beta-galactosyl-1,3)-N-acetylgalactosaminide    | -1.23 | 0.282 | -1.5  | 0.105 | -1.29 | 0.485 | 1.14  | 0.543   | -0.72 |
| 1420186_at   | ---               | ---                                                                               | 1.01  | 0.974 | -2.01 | 0.266 | -1.33 | 0.191 | -1.22 | 0.393   | -0.89 |
| 1452967_at   | 1700006H03Rik     | RIKEN cDNA 1700006H03 gene                                                        | -1.2  | 0.517 | -2.08 | 0.033 | -1.06 | 0.82  | 1.43  | 0.483   | -0.73 |
| 1458792_at   | D12Ert208e        | DNA segment, Chr 12, ERATO Doi 208, expressed                                     | -1.39 | 0.658 | -1.27 | 0.605 | -1.34 | 0.517 | 1.99  | 0.352   | -0.5  |
| 1447267_at   | C85319            | expressed sequence C85319                                                         | -1.05 | 0.874 | -1.65 | 0.115 | -1.43 | 0.255 | 1.06  | 0.864   | -0.77 |
| 1446873_at   | ---               | ---                                                                               | -2.3  | 0.372 | 1.11  | 0.855 | -1.41 | 0.439 | -2.12 | 0.355   | -1.18 |
| 1447171_at   | Nedd4l            | Neural precursor cell expressed, developmentally down-regulated gene 4-like       | -1.6  | 0.099 | 1     | 0.999 | -1.59 | 0.271 | -1.87 | 0.215   | -1.01 |
| 1459990_at   | Ddr1              | discoidin domain receptor family, member 1                                        | -1.33 | 0.293 | -1.54 | 0.068 | -1.17 | 0.648 | 1.17  | 0.606   | -0.72 |
| 1447782_x_at | Tbl3              | transducin (beta)-like 3                                                          | -1.19 | 0.415 | -2    | 0.062 | -1.09 | 0.813 | 1.8   | 0.283   | -0.62 |
| 1423977_at   | 4930453N24Rik /// | RIKEN cDNA 4930453N24 gene ///<br>similar to CG13876-PA ///<br>similar to CG13876 | -1.01 | 0.993 | -2.34 | 0.147 | -1.2  | 0.662 | 1.22  | 0.08    | -0.83 |
| 1437660_at   | Nktr              | natural killer tumor recognition sequence                                         | -1.15 | 0.528 | -1.27 | 0.157 | -1.66 | 0.016 | 1.06  | 0.501   | -0.76 |
| 1420215_x_at | 1810012K16Rik     | RIKEN cDNA 1810012K16 gene                                                        | -1.98 | 0.223 | 1.14  | 0.729 | -1.63 | 0.173 | -1.62 | 0.08    | -1.02 |
| 1457212_at   | ---               | Transcribed locus                                                                 | -2.19 | 0.395 | -2.31 | 0.374 | 1.36  | 0.5   | -1.21 | 0.818   | -1.08 |
| 1430504_at   | 1700108E19Rik     | RIKEN cDNA 1700108E19 gene                                                        | -1.7  | 0.414 | -1.19 | 0.579 | -1.21 | 0.501 | 1.26  | 0.58    | -0.71 |
| 1418756_at   | Trh               | thyrotropin releasing hormone                                                     | -1.19 | 0.324 | -1.09 | 0.891 | -2.01 | 0.337 | 1.14  | 0.346   | -0.79 |
| 1443846_x_at | Pank2             | Pantothenate kinase 2 (Hallervorden-Spatz syndrome)                               | -1.26 | 0.559 | -1.45 | 0.469 | -1.29 | 0.104 | 1.32  | 0.303   | -0.67 |
| 1445046_at   | D8Ert317e         | DNA segment, Chr 8, ERATO Doi 317, expressed                                      | -2.82 | 0.226 | 1     | 0.999 | -1.11 | 0.793 | -1.06 | 0.914   | -1    |
| 1458797_at   | ---               | ---                                                                               | -3.36 | 0.041 | 1.09  | 0.799 | -1.15 | 0.782 | -1.1  | 0.732   | -1.13 |

|              |                   |                                                                                |       |       |       |       |       |       |       |       |       |
|--------------|-------------------|--------------------------------------------------------------------------------|-------|-------|-------|-------|-------|-------|-------|-------|-------|
| 1442966_at   | 5330421F07Rik     | RIKEN cDNA 5330421F07 gene                                                     | -1.21 | 0.766 | -2.82 | 0.184 | 1.08  | 0.831 | -1.64 | 0.341 | -1.15 |
| 1430919_at   | 4930525F21Rik     | RIKEN cDNA 4930525F21 gene                                                     | -1.74 | 0.451 | -1.25 | 0.686 | -1.14 | 0.618 | 2.36  | 0.16  | -0.44 |
| 1421531_at   | Akap3             | A kinase (PRKA) anchor protein 3                                               | -3.37 | 0.022 | -1.4  | 0.184 | 1.25  | 0.571 | -2.03 | 0.306 | -1.39 |
| 1447317_at   | ---               | Transcribed locus                                                              | -1.8  | 0.085 | -1.55 | 0.528 | 1.06  | 0.875 | -1.16 | 0.799 | -0.86 |
| 1421503_at   | Pcdh15            | protocadherin 15                                                               | -1.7  | 0.258 | 1.02  | 0.971 | -1.54 | 0.406 | -1.39 | 0.461 | -0.9  |
| 1432712_at   | 4933425M03Rik     | RIKEN cDNA 4933425M03 gene                                                     | -1.62 | 0.182 | -1.4  | 0.5   | -1.08 | 0.667 | 1.32  | 0.07  | -0.69 |
| 1427509_at   | Baiap3            | BAI1-associated protein 3                                                      | -1.3  | 0.112 | -1.59 | 0.175 | -1.17 | 0.442 | 1.51  | 0.477 | -0.64 |
| 1432972_at   | 4921518B13Rik     | RIKEN cDNA 4921518B13 gene                                                     | -1.22 | 0.228 | -1.99 | 0.02  | -1.07 | 0.904 | 1.29  | 0.543 | -0.75 |
| 1430457_at   | Daf2              | decay accelerating factor 2                                                    | -2.79 | 0.118 | -1.08 | 0.904 | -1.03 | 0.959 | 2.62  | 0.324 | -0.57 |
| 1449457_at   | Acot12            | acyl-CoA thioesterase 12                                                       | -1.19 | 0.088 | -1.67 | 0.004 | -1.22 | 0.605 | 2.71  | 0.004 | -0.34 |
| 1446094_at   | Atbf1             | AT motif binding factor 1                                                      | -1.05 | 0.748 | -1.32 | 0.14  | -1.84 | 0.006 | 1.08  | 0.733 | -0.78 |
| 1429602_at   | Cd164l2           | D164 sialomucin-like 2                                                         | -1.26 | 0.49  | -1.54 | 0.571 | -1.23 | 0.347 | 1.31  | 0.16  | -0.68 |
| 1428238_at   | 2700059D21Rik     | RIKEN cDNA 2700059D21 gene                                                     | -1.59 | 0.591 | -1.34 | 0.519 | -1.14 | 0.699 | 1.5   | 0.178 | -0.64 |
| 1430644_at   | Wbscr25           | Williams Beuren syndrome chromosome region 25 (human)                          | -2.83 | 0.323 | 1.05  | 0.87  | -1.17 | 0.69  | -1.78 | 0.414 | -1.18 |
| 1452873_at   | 5830415F09Rik     | RIKEN cDNA 5830415F09 gene                                                     | -1.42 | 0.351 | -1.32 | 0.108 | -1.26 | 0.396 | 1.85  | 0.316 | -0.54 |
| 1420027_at   | C80171            | expressed sequence C80171                                                      | -1.83 | 0.507 | -1.17 | 0.694 | -1.16 | 0.766 | 1.85  | 0.28  | -0.58 |
| 1450323_at   | 5730493B19Rik     | RIKEN cDNA 5730493B19 gene                                                     | -1.2  | 0.346 | -1.5  | 0.221 | -1.32 | 0.049 | 1.38  | 0.122 | -0.66 |
| 1421194_at   | Itga4             | integrin alpha 4                                                               | -2.85 | 0.153 | 1.09  | 0.83  | -1.22 | 0.447 | -1.04 | 0.803 | -1.01 |
| 1446340_at   | Ar                | Androgen receptor                                                              | -1.01 | 0.984 | -1.15 | 0.694 | -2.47 | 0.193 | 1.56  | 0.504 | -0.77 |
| 1444777_at   | Rai14             | Retinoic acid induced 14                                                       | 1.02  | 0.881 | -1.25 | 0.09  | -2.31 | 0.003 | -1.09 | 0.557 | -0.9  |
| 1455053_a_at | Dcun1d1           | DCUN1D1 DCN1, defective in cullin neddylation 1, domain containing 1 (S. cerev | -1.26 | 0.235 | -1.23 | 0.22  | -1.52 | 0.041 | 1.53  | 0.451 | -0.62 |
| 1458768_at   | Epb4.115          | Erythrocyte protein band 4.1-like 5                                            | -1.05 | 0.742 | -1.55 | 0.065 | -1.51 | 0.089 | 1.15  | 0.815 | -0.74 |
| 1416872_at   | Tspan6            | tetraspanin 6                                                                  | -1.19 | 0.159 | -1.37 | 0.288 | -1.45 | 0.034 | 1.26  | 0.186 | -0.69 |
| 1443625_at   | Nat11             | N-acetyltransferase 11                                                         | -1.43 | 0.289 | -1.57 | 0.071 | -1.08 | 0.802 | 1.22  | 0.123 | -0.72 |
| 1441629_at   | Grip1             | Glutamate receptor interacting protein 1                                       | -1.19 | 0.16  | -1.19 | 0.573 | -1.73 | 0.007 | 1.61  | 0.42  | -0.62 |
| 1447096_at   | ---               | Transcribed locus                                                              | -1.5  | 0.011 | 1.14  | 0.602 | -2.21 | 0.009 | -1.36 | 0.153 | -0.98 |
| 1432773_at   | 2610105M22Rik     | RIKEN cDNA 2610105M22 gene                                                     | -1.26 | 0.413 | -2.02 | 0.191 | -1.03 | 0.951 | 3.26  | 0.002 | -0.26 |
| 1431795_a_at | Sema3b            | sema domain, immunoglobulin domain (Ig), short basic domain, secreted, (sema   | -1.55 | 0.316 | -1.25 | 0.698 | -1.23 | 0.376 | 1.6   | 0.286 | -0.61 |
| 1442488_at   | Gpc5              | Glypican 5                                                                     | 1.18  | 0.779 | -3.59 | 0.033 | -1.24 | 0.643 | -1.4  | 0.084 | -1.26 |
| 1458509_at   | Mre11a            | Meiotic recombination 11 homolog A (S. cerevisiae)                             | -1.11 | 0.715 | -2.14 | 0.032 | -1.12 | 0.298 | 1.07  | 0.867 | -0.82 |
| 1429783_at   | Pdlim5            | PDZ and LIM domain 5                                                           | -1.53 | 0.631 | -1.84 | 0.082 | 1.06  | 0.822 | -1.39 | 0.391 | -0.92 |
| 1440114_x_at | Ankrd47           | ankyrin repeat domain 47                                                       | 1.07  | 0.232 | -1.92 | 0.035 | -1.49 | 0.019 | -2    | 0.227 | -1.08 |
| 1420768_a_at | D11Lgp2e          | DNA segment, Chr 11, Lothar Hennighausen 2, expressed                          | -1.99 | 0.235 | -1.39 | 0.512 | 1.04  | 0.96  | -1.39 | 0.683 | -0.93 |
| 1430701_a_at | 5730528L13Rik     | RIKEN cDNA 5730528L13 gene                                                     | -1.04 | 0.78  | -1.41 | 0.434 | -1.69 | 0.2   | 1.11  | 0.719 | -0.76 |
| 1420284_at   | Bat4              | HLA-B associated transcript 4                                                  | -2.47 | 0.108 | -1.74 | 0.004 | 1.28  | 0.46  | -1.28 | 0.235 | -1.05 |
| 1447955_at   | LOC670127         | similar to heterochromatin protein 1, binding protein 3                        | -1.28 | 0.322 | -1.81 | 0.531 | -1.08 | 0.427 | 1.39  | 0.269 | -0.69 |
| 1450315_at   | V1rd14            | vomeroneasal 1 receptor, D14                                                   | -1.55 | 0.475 | 1.04  | 0.878 | -1.73 | 0.042 | -1.05 | 0.916 | -0.82 |
| 1450301_at   | H28               | histocompatibility 28                                                          | -1.84 | 0.513 | 1.08  | 0.923 | -1.57 | 0.476 | -1.99 | 0.375 | -1.08 |
| 1442522_at   | ---               | ---                                                                            | -1.16 | 0.534 | -1.66 | 0.256 | -1.25 | 0.501 | 1.38  | 0.334 | -0.67 |
| 1420300_at   | ---               | ---                                                                            | -1.99 | 0.567 | -1.22 | 0.785 | -1.06 | 0.889 | 1.2   | 0.725 | -0.77 |
| 1443342_at   | ---               | Transcribed locus                                                              | 1.01  | 0.981 | -2.11 | 0.257 | -1.29 | 0.499 | -1.08 | 0.76  | -0.87 |
| 1418461_at   | Sh3d19            | SH3 domain protein D19                                                         | -1.38 | 0.098 | -1.51 | 0.051 | -1.14 | 0.312 | 1.26  | 0.533 | -0.69 |
| 1443307_at   | Psmc2             | Proteasome (prosome, macropain) 26S subunit, ATPase 2                          | 1     | 0.993 | -1.46 | 0.237 | -1.73 | 0.021 | -1.03 | 0.877 | -0.8  |
| 1457671_at   | 9330120H11Rik     | RIKEN cDNA 9330120H11 gene                                                     | -1.3  | 0.639 | -1.39 | 0.125 | -1.29 | 0.367 | 1.56  | 0.16  | -0.61 |
| 1454088_at   | 5330411O13Rik     | RIKEN cDNA 5330411O13 gene                                                     | -2.37 | 0.279 | -1.24 | 0.651 | 1.04  | 0.947 | -1.09 | 0.679 | -0.92 |
| 1435707_at   | Nars2             | asparaginyl-tRNA synthetase 2 (mitochondrial)(putative)                        | -1.23 | 0.395 | -1.68 | 0.119 | -1.17 | 0.436 | 1.01  | 0.959 | -0.77 |
| 1444555_at   | Ches1             | Checkpoint suppressor 1                                                        | -2.02 | 0.301 | 1.24  | 0.685 | -1.89 | 0.133 | -1.57 | 0.197 | -1.06 |
| 1440416_at   | Usp46             | Ubiquitin specific peptidase 46                                                | -1.13 | 0.643 | -1.17 | 0.546 | -1.91 | 0.059 | 1.84  | 0.248 | -0.59 |
| 1453700_s_at | 4933403O03Rik /// | RIKEN cDNA 4933403O03 gene ///<br>similar to double homeobox, 4                | -1.19 | 0.856 | -1.9  | 0.162 | -1.11 | 0.85  | 1.07  | 0.884 | -0.78 |
| 1458368_at   | Myh4              | myosin, heavy polypeptide 4, skeletal muscle                                   | -2.1  | 0.24  | -1.4  | 0.662 | 1.08  | 0.624 | -1.51 | 0.29  | -0.98 |
| 1421535_a_at | Pde4a             | phosphodiesterase 4A, cAMP specific                                            | 1.01  | 0.973 | -2.73 | 0.011 | -1.12 | 0.385 | -1    | 0.985 | -0.96 |
| 1430711_at   | 4933416E03Rik     | RIKEN cDNA 4933416E03 gene                                                     | -1.49 | 0.603 | -1.38 | 0.65  | -1.15 | 0.792 | 1.56  | 0.312 | -0.61 |
| 1457485_at   | Fbxw11            | F-box and WD-40 domain protein 11                                              | -1.15 | 0.225 | -1.27 | 0.37  | -1.63 | 0.093 | 1.1   | 0.375 | -0.74 |

|              |                   |                                                                                        |       |       |       |       |       |       |       |       |       |
|--------------|-------------------|----------------------------------------------------------------------------------------|-------|-------|-------|-------|-------|-------|-------|-------|-------|
| 1459152_at   | C78515            | expressed sequence C78515                                                              | -1.19 | 0.74  | -1.42 | 0.272 | -1.38 | 0.65  | 1.63  | 0.56  | -0.59 |
| 1429150_at   | Ccdc77            | coiled-coil domain containing 77                                                       | -1.57 | 0.229 | -1.28 | 0.025 | -1.18 | 0.34  | 1.54  | 0.292 | -0.62 |
| 1438703_at   | Ankrd26           | ankyrin repeat domain 26                                                               | -1.2  | 0.311 | -1.5  | 0.118 | -1.3  | 0.033 | 1.11  | 0.689 | -0.72 |
| 1460022_at   | Abcb8             | ATP-binding cassette, sub-family B (MDR/TAP), member 8                                 | -1.13 | 0.795 | -1.53 | 0.62  | -1.37 | 0.477 | 1.63  | 0.148 | -0.6  |
| 1458885_at   | ---               | ---                                                                                    | -2.14 | 0.173 | -1.22 | 0.288 | -1.02 | 0.899 | 1.16  | 0.739 | -0.81 |
| 1424454_at   | Tmem87a           | transmembrane protein 87A                                                              | -1.35 | 0.736 | -2.9  | 0.176 | 1.18  | 0.698 | -2.02 | 0.362 | -1.27 |
| 1450090_at   | Zfp101            | zinc finger protein 101                                                                | -1.22 | 0.27  | -1.57 | 0.016 | -1.24 | 0.267 | 1.51  | 0.255 | -0.63 |
| 1446963_at   | ---               | ---                                                                                    | -1.06 | 0.671 | -1.42 | 0.403 | -1.62 | 0.166 | 2.61  | 0.085 | -0.37 |
| 1443678_at   | ---               | 10 days neonate cerebellum cDNA, RIKEN full-length enriched library, clone:B93         | -1.37 | 0.763 | -1.13 | 0.856 | -1.54 | 0.219 | 1.29  | 0.457 | -0.69 |
| 1445431_at   | Stk39             | Serine/threonine kinase 39, STE20/SPS1 homolog (yeast)                                 | -1.47 | 0.03  | -1.79 | 0.176 | 1.03  | 0.953 | -1.38 | 0.221 | -0.9  |
| 1431182_at   | Hspa8 /// LOC6212 | heat shock protein 8 /// similar to heat shock protein 8 /// similar to heat shock pro | -2.1  | 0.404 | -1.35 | 0.463 | 1.05  | 0.911 | -1.24 | 0.704 | -0.91 |
| 1460540_at   | Nrxn1             | neurexin I                                                                             | -2.29 | 0.032 | -1.15 | 0.752 | -1.04 | 0.903 | 1.12  | 0.63  | -0.84 |
| 1438028_at   | 4930535B03Rik     | RIKEN cDNA 4930535B03 gene                                                             | -1.27 | 0.042 | -1.27 | 0.007 | -1.46 | 0.02  | 1.04  | 0.568 | -0.74 |
| 1458794_at   | ---               | ---                                                                                    | -1.22 | 0.464 | -1.51 | 0.307 | -1.28 | 0.653 | 2.44  | 0.043 | -0.39 |
| 1437228_at   | BC048651          | cDNA sequence BC048651                                                                 | -1.45 | 0.073 | -1.22 | 0.473 | -1.31 | 0.311 | 1.12  | 0.331 | -0.72 |
| 1449081_at   | Ces3              | carboxylesterase 3                                                                     | -1.45 | 0.228 | -1.36 | 0.343 | -1.18 | 0.067 | 2.62  | 0.039 | -0.34 |
| 1459631_at   | Rps12 /// LOC4328 | ribosomal protein S12 /// similar to ribosomal protein S12 /// similar to ribosomal p  | -3.03 | 0.193 | -1.01 | 0.982 | -1.05 | 0.824 | 1.16  | 0.775 | -0.99 |
| 1427664_at   | 4930453N24Rik     | RIKEN cDNA 4930453N24 gene                                                             | -2.21 | 0.296 | 1.17  | 0.723 | -1.54 | 0.399 | -1.03 | 0.968 | -0.9  |
| 1442463_at   | Rab10             | RAB10, member RAS oncogene family                                                      | -1.52 | 0.303 | -1.13 | 0.746 | -1.38 | 0.297 | 1.17  | 0.777 | -0.72 |
| 1457997_at   | Leng4             | leukocyte receptor cluster (LRC) member 4                                              | -1.84 | 0.104 | 1     | 0.996 | -1.38 | 0.099 | -1.54 | 0.079 | -0.94 |
| 1455095_at   | Hist2h2be         | histone 2, H2be                                                                        | -1.4  | 0.236 | -1.22 | 0.241 | -1.36 | 0.082 | 1.52  | 0.375 | -0.62 |
| 1424310_at   | ---               | ---                                                                                    | -1.04 | 0.843 | -1.49 | 0.034 | -1.58 | 0.042 | 1.01  | 0.466 | -0.77 |
| 1458078_at   | Chd9              | chromodomain helicase DNA binding protein 9                                            | 1.07  | 0.882 | -1.77 | 0.083 | -1.58 | 0.072 | -1.46 | 0.212 | -0.93 |
| 1433329_at   | 4930573C08Rik     | RIKEN cDNA 4930573C08 gene                                                             | -2.03 | 0.183 | -1.76 | 0.277 | 1.21  | 0.362 | -1.02 | 0.905 | -0.9  |
| 1454302_at   | 5730410E19Rik     | RIKEN cDNA 5730410E19 gene                                                             | -1.81 | 0.185 | -1.22 | 0.7   | -1.11 | 0.823 | 1.05  | 0.848 | -0.77 |
| 1446855_at   | Vps13d            | vacuolar protein sorting 13 D (yeast)                                                  | -1.57 | 0.081 | -1.34 | 0.297 | -1.13 | 0.654 | 1.01  | 0.981 | -0.76 |
| 1450692_at   | Kif4              | kinesin family member 4                                                                | -1.94 | 0.407 | -1.16 | 0.855 | -1.12 | 0.675 | 3.69  | 0.157 | -0.13 |
| 1422269_at   | Insm2             | insulinoma-associated 2                                                                | 1.13  | 0.171 | -1.79 | 0.218 | -1.72 | 0.317 | -1.57 | 0.504 | -0.99 |
| 1449604_at   | Acp1 /// LOC61999 | acid phosphatase 1, soluble /// similar to acid phosphatase 1, soluble /// similar to  | -2.7  | 0.071 | 1.22  | 0.769 | -1.48 | 0.329 | -1.2  | 0.612 | -1.04 |
| 1445418_at   | Smg6              | Smg-6 homolog, nonsense mediated mRNA decay factor (C. elegans)                        | -1.17 | 0.652 | -1.66 | 0.292 | -1.23 | 0.65  | 1.01  | 0.97  | -0.76 |
| 1422728_at   | Inha              | inhibin alpha                                                                          | 1.14  | 0.103 | -2.11 | 0.058 | -1.51 | 0.105 | -1.31 | 0.597 | -0.95 |
| 1431002_x_at | Fahd2a            | fumarylacetoacetate hydrolase domain containing 2A                                     | -1.24 | 0.279 | -1.62 | 0.087 | -1.18 | 0.307 | 1.17  | 0.249 | -0.72 |
| 1431443_at   | 1810008B01Rik     | RIKEN cDNA 1810008B01 gene                                                             | -1.8  | 0.113 | -1.12 | 0.776 | -1.21 | 0.308 | 1.18  | 0.221 | -0.74 |
| 1430092_at   | Serac1            | serine active site containing 1                                                        | -1.05 | 0.736 | -1.32 | 0.287 | -1.78 | 0.128 | 1.08  | 0.843 | -0.77 |
| 1453568_at   | 2310032F03Rik     | RIKEN cDNA 2310032F03 gene                                                             | 1.02  | 0.946 | -1.47 | 0.439 | -1.74 | 0.311 | -3.18 | 0.098 | -1.35 |
| 1447325_at   | Ches1             | Checkpoint suppressor 1                                                                | 1.11  | 0.659 | -1.38 | 0.582 | -2.28 | 0.091 | -2.03 | 0.078 | -1.15 |
| 1421171_at   | Adam12            | a disintegrin and metallopeptidase domain 12 (meltrin alpha)                           | -1.2  | 0.198 | -1.19 | 0.792 | -1.68 | 0.264 | 1.46  | 0.58  | -0.65 |
| 1425955_at   | Cav2              | caveolin 2                                                                             | -1.12 | 0.7   | -1.17 | 0.582 | -1.92 | 0.026 | 1.15  | 0.532 | -0.76 |
| 1422169_a_at | Bdnf              | brain derived neurotrophic factor                                                      | -1.24 | 0.489 | -1.27 | 0.733 | -1.48 | 0.13  | 1.49  | 0.505 | -0.62 |
| 1430432_at   | Trim42            | tripartite motif-containing 42                                                         | -1.01 | 0.989 | -1.2  | 0.757 | -2.24 | 0.068 | 1.51  | 0.479 | -0.73 |
| 1429051_s_at | Sox11             | SRY-box containing gene 11                                                             | -1.03 | 0.905 | -1.25 | 0.663 | -2    | 0.081 | 1.46  | 0.561 | -0.7  |
| 1438305_at   | Rims1             | regulating synaptic membrane exocytosis 1                                              | -2.21 | 0.164 | -1.15 | 0.824 | -1.05 | 0.855 | 2.07  | 0.098 | -0.59 |
| 1420270_at   | ---               | ---                                                                                    | -1.81 | 0.045 | -1.27 | 0.589 | -1.07 | 0.733 | 1.25  | 0.6   | -0.72 |
| 1439895_at   | AU021025          | expressed sequence AU021025                                                            | -1.33 | 0.137 | -1.09 | 0.627 | -1.68 | 0.023 | 1.09  | 0.569 | -0.75 |
| 1425075_at   | Gatad2b           | GATA zinc finger domain containing 2B                                                  | -1.39 | 0.22  | -1.28 | 0.638 | -1.3  | 0.305 | 1.36  | 0.251 | -0.65 |
| 1442527_at   | C87583            | expressed sequence C87583                                                              | -2.26 | 0.367 | -1.72 | 0.027 | 1.25  | 0.569 | -2.45 | 0.202 | -1.3  |
| 1457084_at   | Nalp9b            | NACHT, LRR and PYD containing protein 9b                                               | -1.79 | 0.559 | -1.47 | 0.348 | 1.03  | 0.945 | -2.38 | 0.152 | -1.15 |
| 1440797_at   | Dlx6os2           | Dlx6 opposite strand transcript 2                                                      | -1.45 | 0.504 | -2.05 | 0.145 | 1.09  | 0.624 | -1.02 | 0.954 | -0.86 |
| 1431967_at   | 1700006A11Rik     | RIKEN cDNA 1700006A11 gene                                                             | -1    | 0.993 | -1.32 | 0.735 | -1.94 | 0.38  | 1.26  | 0.655 | -0.75 |
| 1455967_at   | Sorbs1            | sorbin and SH3 domain containing 1                                                     | -1.16 | 0.432 | -1.39 | 0.236 | -1.45 | 0.202 | 1.65  | 0.22  | -0.59 |
| 1430674_at   | 1700016C15Rik     | RIKEN cDNA 1700016C15 gene                                                             | 1.11  | 0.78  | -1.71 | 0.486 | -1.73 | 0.345 | -1.51 | 0.337 | -0.96 |
| 1419734_at   | Actb              | actin, beta, cytoplasmic                                                               | -1.04 | 0.953 | -1.07 | 0.854 | -2.69 | 0.375 | 1.89  | 0.108 | -0.73 |
| 1447822_x_at | 2700038N03Rik     | RIKEN cDNA 2700038N03 gene                                                             | -1.56 | 0.031 | -1.37 | 0.223 | -1.11 | 0.496 | 2.06  | 0.16  | -0.5  |

|              |                   |                                                                                                             |       |       |       |       |       |       |       |       |       |
|--------------|-------------------|-------------------------------------------------------------------------------------------------------------|-------|-------|-------|-------|-------|-------|-------|-------|-------|
| 1442852_at   | ---               | ---                                                                                                         | -1.31 | 0.623 | -1.33 | 0.312 | -1.32 | 0.464 | 1.08  | 0.813 | -0.72 |
| 1455730_at   | Dlg7              | discs, large homolog 7 (Drosophila)                                                                         | -1.06 | 0.929 | -1.9  | 0.208 | -1.25 | 0.621 | 4.72  | 0.191 | 0.13  |
| 1443472_at   | C77691            | expressed sequence C77691                                                                                   | 1.23  | 0.844 | -2.18 | 0.033 | -1.71 | 0.247 | -1.41 | 0.299 | -1.02 |
| 1451685_at   | MLt6 /// LOC63949 | myeloid/lymphoid or mixed lineage-leukemia translocation to 6 homolog (Drosophila)                          | -1.71 | 0.008 | -1.18 | 0.763 | -1.19 | 0.125 | 1.46  | 0.382 | -0.65 |
| 1432392_at   | Kif2c             | kinesin family member 2C                                                                                    | -1.2  | 0.645 | -1.54 | 0.089 | -1.27 | 0.524 | 1.44  | 0.276 | -0.64 |
| 1417682_a_at | Prss2             | protease, serine, 2                                                                                         | -1.8  | 0.187 | -1.78 | 0.2   | 1.16  | 0.693 | -1.22 | 0.523 | -0.91 |
| 1441651_at   | 4930414N06Rik     | RIKEN cDNA 4930414N06 gene                                                                                  | -1.18 | 0.205 | -1.15 | 0.598 | -1.79 | 0.121 | 1.13  | 0.671 | -0.75 |
| 1427339_at   | Slc30a2           | solute carrier family 30 (zinc transporter), member 2                                                       | -1.24 | 0.232 | -1.62 | 0.371 | -1.17 | 0.69  | 1.16  | 0.19  | -0.72 |
| 1444981_at   | Punc              | Putative neuronal cell adhesion molecule                                                                    | -1.49 | 0.144 | -1.25 | 0.308 | -1.25 | 0.29  | 1.02  | 0.716 | -0.74 |
| 1426887_at   | Nudt11            | nudix (nucleoside diphosphate linked moiety X)-type motif 11                                                | -1.44 | 0.261 | -1.15 | 0.748 | -1.41 | 0.111 | 1.19  | 0.246 | -0.7  |
| 1424030_at   | Grhl1             | grainyhead-like 1 (Drosophila)                                                                              | -1.61 | 0.25  | -1.83 | 0.426 | 1.11  | 0.344 | -1.18 | 0.759 | -0.88 |
| 1445673_at   | 2900052N01Rik     | RIKEN cDNA 2900052N01 gene                                                                                  | -2.28 | 0.33  | -1.23 | 0.715 | 1.02  | 0.95  | -1.73 | 0.136 | -1.05 |
| 1456746_a_at | Cd99l2            | Cd99 antigen-like 2                                                                                         | -1.13 | 0.571 | -1.27 | 0.11  | -1.66 | 0.114 | 1.35  | 0.145 | -0.68 |
| 1427634_at   | Kcnh7             | potassium voltage-gated channel, subfamily H (eag-related), member 7                                        | -1.67 | 0.002 | -1.01 | 0.993 | -1.47 | 0.305 | 1.94  | 0.013 | -0.55 |
| 1433948_at   | Pla2g1b           | Phospholipase A2, group IB, pancreas                                                                        | -2.85 | 0.211 | -1.04 | 0.952 | -1.04 | 0.945 | 1.16  | 0.677 | -0.94 |
| 1449639_at   | 0610040J01Rik     | RIKEN cDNA 0610040J01 gene                                                                                  | -1.29 | 0.436 | -1.6  | 0.088 | -1.15 | 0.397 | 1.1   | 0.835 | -0.73 |
| 1426136_x_at | Klra21            | killer cell lectin-like receptor subfamily A, member 21                                                     | -2.69 | 0.154 | 1.11  | 0.351 | -1.27 | 0.305 | -1.07 | 0.89  | -0.98 |
| 1449854_at   | Nr0b2             | nuclear receptor subfamily 0, group B, member 2                                                             | -1.24 | 0.231 | -1.61 | 0.039 | -1.18 | 0.725 | 2.11  | 0.29  | -0.48 |
| 1432133_at   | 2210022J03Rik     | RIKEN cDNA 2210022J03 gene                                                                                  | -1.47 | 0.528 | -1.79 | 0.183 | 1.04  | 0.924 | -1.49 | 0.35  | -0.93 |
| 1453084_s_at | Col22a1           | collagen, type XXII, alpha 1                                                                                | -1.66 | 0.007 | -1.73 | 0.285 | 1.1   | 0.584 | -1.18 | 0.841 | -0.87 |
| 1436287_at   | ---               | 13 days embryo head cDNA, RIKEN full-length enriched library, clone:311003312                               | 1.06  | 0.738 | -1.6  | 0.384 | -1.68 | 0.228 | -1.71 | 0.315 | -0.98 |
| 1416444_at   | Elov12            | elongation of very long chain fatty acids (FEN1/Elo2, SUR4/Elo3, yeast)-like 2                              | -1.22 | 0.098 | -1.56 | 0.014 | -1.23 | 0.669 | 1.45  | 0.429 | -0.64 |
| 1419325_at   | Nmu               | neuromedin U                                                                                                | -1.01 | 0.662 | -1.62 | 0.049 | -1.48 | 0.171 | 1.35  | 0.172 | -0.69 |
| 1459757_x_at | Cnot10            | CCR4-NOT transcription complex, subunit 10                                                                  | -1.53 | 0.285 | -1.27 | 0.511 | -1.2  | 0.325 | 1.02  | 0.92  | -0.74 |
| 1450749_a_at | Nr4a2             | nuclear receptor subfamily 4, group A, member 2                                                             | -1.03 | 0.662 | -2.13 | 0.031 | -1.19 | 0.409 | 1.32  | 0.545 | -0.76 |
| 1452345_at   | Lmod2             | leiomodin 2 (cardiac)                                                                                       | -3.5  | 0.342 | -1.02 | 0.964 | 1.01  | 0.921 | -1.42 | 0.378 | -1.23 |
| 1432563_at   | 1700116B05Rik     | RIKEN cDNA 1700116B05 gene                                                                                  | -1.16 | 0.588 | -2.58 | 0.212 | 1.02  | 0.87  | -1.26 | 0.59  | -0.99 |
| 1458852_at   | ---               | ---                                                                                                         | -1.98 | 0.019 | -1.68 | 0.055 | 1.18  | 0.445 | -1.61 | 0.121 | -1.03 |
| 1439734_at   | Mmp15             | Matrix metalloproteinase 15                                                                                 | -1.32 | 0.516 | -1.92 | 0.15  | -1    | 0.991 | 1.09  | 0.782 | -0.79 |
| 1459308_at   | Kcnn3             | Potassium intermediate/small conductance calcium-activated channel, subfamily                               | -1.3  | 0.441 | -1.48 | 0.283 | -1.21 | 0.46  | 2     | 0.047 | -0.49 |
| 1441450_s_at | Jarid1c           | jumonji, AT rich interactive domain 1C (Rbp2 like)                                                          | -1.18 | 0.371 | -1.4  | 0.22  | -1.4  | 0.207 | 1.18  | 0.452 | -0.7  |
| 1447295_at   | Cutl1             | Cut-like 1 (Drosophila)                                                                                     | -1.39 | 0.042 | -1.17 | 0.293 | -1.42 | 0.247 | 1.05  | 0.778 | -0.73 |
| 1446610_at   | Elmo1             | engulfment and cell motility 1, ced-12 homolog (C. elegans)                                                 | -3    | 0.179 | 1.35  | 0.432 | -1.68 | 0.344 | -1.84 | 0.282 | -1.29 |
| 1430953_at   | 3200001G23Rik     | RIKEN cDNA 3200001G23 gene                                                                                  | 1     | 0.973 | -1.05 | 0.792 | -3.08 | 0.134 | -1.45 | 0.02  | -1.15 |
| 1424897_at   | Gpr85             | G protein-coupled receptor 85                                                                               | -1.2  | 0.497 | -2.28 | 0.025 | 1     | 0.988 | -1.11 | 0.836 | -0.9  |
| 1432626_at   | 5730507A11Rik     | RIKEN cDNA 5730507A11 gene                                                                                  | -1.44 | 0.145 | 1.06  | 0.832 | -1.92 | 0.024 | -1.4  | 0.449 | -0.92 |
| 1428965_at   | Ccdc54            | coiled-coil domain containing 54                                                                            | -1.24 | 0.117 | -1.31 | 0.683 | -1.42 | 0.003 | 1.2   | 0.472 | -0.69 |
| 1458035_at   | Sgpp2             | Sphingosine-1-phosphate phosphatase 2                                                                       | -1.55 | 0.2   | -1.15 | 0.853 | -1.32 | 0.381 | 1.36  | 0.588 | -0.66 |
| 1438269_at   | Zbtb38            | zinc finger and BTB domain containing 38                                                                    | -1.83 | 0.22  | -1.04 | 0.892 | -1.31 | 0.452 | 1.26  | 0.345 | -0.73 |
| 1440472_at   | Spag17            | sperm associated antigen 17                                                                                 | -1.24 | 0.67  | -1.44 | 0.598 | -1.28 | 0.431 | 1.08  | 0.867 | -0.72 |
| 1447036_at   | Chl1              | cell adhesion molecule with homology to L1CAM                                                               | -1.31 | 0.334 | -1.27 | 0.464 | -1.38 | 0.47  | 1.33  | 0.442 | -0.66 |
| 1440375_at   | 5730419I09Rik     | RIKEN cDNA 5730419I09 gene                                                                                  | -1.04 | 0.891 | -1.41 | 0.504 | -1.63 | 0.098 | 1.22  | 0.37  | -0.72 |
| 1422652_at   | Cryga             | crystallin, gamma A                                                                                         | -1.39 | 0.023 | -1.09 | 0.843 | -1.56 | 0.209 | 2.19  | 0.085 | -0.46 |
| 1424699_at   | 4921511K06Rik     | RIKEN cDNA 4921511K06 gene                                                                                  | 1.14  | 0.721 | -2.56 | 0.411 | -1.33 | 0.316 | -1.19 | 0.15  | -0.99 |
| 1423360_at   | Yme1l1            | YME1-like 1 (S. cerevisiae)                                                                                 | -1.28 | 0.292 | -1.21 | 0.164 | -1.49 | 0.059 | 1.05  | 0.839 | -0.73 |
| 1423849_a_at | Clk3              | CDC-like kinase 3                                                                                           | -1.31 | 0.105 | -1.28 | 0.033 | -1.36 | 0.202 | 1.3   | 0.442 | -0.66 |
| 1426622_a_at | Qpct /// LOC63994 | glutaminyl-peptide cyclotransferase (glutaminyl cyclase) /// similar to Glutaminyl-peptide cyclotransferase | 1.1   | 0.848 | -1.69 | 0.006 | -1.69 | 0.052 | -1.13 | 0.437 | -0.85 |
| 1457714_at   | 2310005N03Rik     | RIKEN cDNA 2310005N03 gene                                                                                  | -3.19 | 0.25  | -1.09 | 0.907 | 1.05  | 0.876 | -2.4  | 0.287 | -1.41 |
| 1437424_at   | Syde2 /// LOC6396 | synapse defective 1, Rho GTPase, homolog 2 (C. elegans) /// similar to synapse defective 1                  | -1.28 | 0.219 | -1.52 | 0.244 | -1.2  | 0.339 | 1.27  | 0.447 | -0.68 |
| 1435043_at   | Plcb1             | phospholipase C, beta 1                                                                                     | -1.11 | 0.343 | -1.17 | 0.315 | -1.89 | 0.067 | 1.24  | 0.415 | -0.73 |
| 1420595_at   | Dlx4              | distal-less homeobox 4                                                                                      | -1.53 | 0.017 | -1.46 | 0.047 | -1.06 | 0.789 | 1.01  | 0.974 | -0.76 |
| 1454223_at   | 4933423P22Rik     | RIKEN cDNA 4933423P22 gene                                                                                  | -1.48 | 0.225 | -1.37 | 0.086 | -1.14 | 0.379 | 1.11  | 0.676 | -0.72 |
| 1420848_at   | Sufu              | suppressor of fused homolog (Drosophila)                                                                    | -1.83 | 0.131 | -1.39 | 0.472 | 1.01  | 0.964 | -1.11 | 0.293 | -0.83 |

|              |                   |                                                                                      |       |       |       |       |       |       |       |       |       |
|--------------|-------------------|--------------------------------------------------------------------------------------|-------|-------|-------|-------|-------|-------|-------|-------|-------|
| 1453122_at   | 4921533L14Rik     | RIKEN cDNA 4921533L14 gene                                                           | -1.17 | 0.094 | -1.31 | 0.082 | -1.52 | 0.031 | 1.16  | 0.639 | -0.71 |
| 1417678_at   | Mmp24             | matrix metalloproteinase 24                                                          | -1.43 | 0.618 | -1.32 | 0.472 | -1.22 | 0.421 | 1.06  | 0.79  | -0.73 |
| 1430494_at   | 2010005J08Rik     | RIKEN cDNA 2010005J08 gene                                                           | -1.24 | 0.505 | -1.52 | 0.002 | -1.22 | 0.55  | 1     | 0.984 | -0.75 |
| 1447854_s_at | Hist2h2be         | histone 2, H2be                                                                      | -1.33 | 0.177 | -1.2  | 0.486 | -1.43 | 0.008 | 1.33  | 0.426 | -0.66 |
| 1420151_at   | ---               | ---                                                                                  | 1.26  | 0.679 | -1.56 | 0.433 | -2.66 | 0.045 | -1.18 | 0.608 | -1.03 |
| 1425389_a_at | Runx2             | runt related transcription factor 2                                                  | -1.54 | 0.443 | -1.29 | 0.449 | -1.17 | 0.318 | 1.43  | 0.435 | -0.64 |
| 1419663_at   | Ogn               | osteoglycin                                                                          | 1.04  | 0.829 | -2.12 | 0.015 | -1.29 | 0.076 | -1.6  | 0.383 | -0.99 |
| 1426081_a_at | Dio2              | deiodinase, iodothyronine, type II                                                   | -1.46 | 0.078 | -1.06 | 0.878 | -1.54 | 0.372 | 1.41  | 0.512 | -0.66 |
| 1458884_at   | ---               | ---                                                                                  | 1.08  | 0.85  | -1.32 | 0.61  | -2.26 | 0.001 | -1.18 | 0.667 | -0.92 |
| 1431536_at   | 4933432K03Rik     | RIKEN cDNA 4933432K03 gene                                                           | -1.17 | 0.855 | -1.41 | 0.524 | -1.4  | 0.357 | 1.35  | 0.716 | -0.66 |
| 1443234_at   | BC088983          | CDNA sequence BC088983                                                               | -1.07 | 0.749 | -1.35 | 0.502 | -1.65 | 0.011 | 1.1   | 0.75  | -0.74 |
| 1446173_at   | ---               | ---                                                                                  | -2.01 | 0.039 | -1.85 | 0.25  | 1.24  | 0.548 | -1.85 | 0.372 | -1.12 |
| 1445634_at   | Mapt              | Microtubule-associated protein tau                                                   | -1.38 | 0.14  | -1.22 | 0.389 | -1.36 | 0.427 | 1.09  | 0.728 | -0.72 |
| 1435301_at   | 1110004E09Rik     | RIKEN cDNA 1110004E09 gene                                                           | -1.12 | 0.39  | -1.7  | 0.443 | -1.24 | 0.248 | 1.28  | 0.371 | -0.7  |
| 1420061_s_at | AA675344          | expressed sequence AA675344                                                          | -1.05 | 0.9   | -1.46 | 0.468 | -1.55 | 0.302 | 1.33  | 0.406 | -0.68 |
| 1430721_at   | 4931431C16Rik     | RIKEN cDNA 4931431C16 gene                                                           | 1.45  | 0.424 | -2.43 | 0.185 | -2.39 | 0.073 | -1.04 | 0.951 | -1.1  |
| 1439245_at   | Tnrc6a            | trinucleotide repeat containing 6a                                                   | -1.34 | 0.419 | -1.31 | 0.275 | -1.29 | 0.438 | 1.11  | 0.678 | -0.71 |
| 1445804_at   | 9630020C08Rik     | RIKEN cDNA 9630020C08 gene                                                           | -1.14 | 0.486 | -1.67 | 0.532 | -1.24 | 0.59  | 1.02  | 0.977 | -0.76 |
| 1459568_at   | Tmtc4             | Transmembrane and tetratricopeptide repeat containing 4                              | 1.23  | 0.303 | -1.72 | 0.294 | -2.09 | 0.021 | -1.61 | 0.182 | -1.05 |
| 1438166_x_at | Ndufs4            | NADH dehydrogenase (ubiquinone) Fe-S protein 4                                       | -1.65 | 0.182 | -1.26 | 0.033 | -1.13 | 0.445 | 1.02  | 0.938 | -0.76 |
| 1423496_a_at | Punc              | putative neuronal cell adhesion molecule                                             | -1.42 | 0.524 | -1.09 | 0.807 | -1.52 | 0.174 | 1.07  | 0.752 | -0.74 |
| 1440788_at   | Gas8              | Growth arrest specific 8                                                             | -2.36 | 0.119 | -2.67 | 0.192 | 1.49  | 0.272 | -1.05 | 0.921 | -1.15 |
| 1431111_at   | Eno1 /// LOC23894 | enolase 1, alpha non-neuron /// similar to enolase 1, alpha non-neuron /// similar t | 1.01  | 0.96  | -1.8  | 0.029 | -1.38 | 0.494 | -1.2  | 0.448 | -0.84 |
| 1459328_at   | 4930429A22Rik     | RIKEN cDNA 4930429A22 gene                                                           | -1.43 | 0.678 | -1.53 | 0.462 | -1.07 | 0.894 | 1.23  | 0.647 | -0.7  |
| 1439535_at   | ---               | ---                                                                                  | -1.28 | 0.197 | -1.06 | 0.872 | -1.79 | 0.042 | 1.27  | 0.492 | -0.72 |
| 1458672_at   | Tcte2             | T-complex-associated testis expressed 2                                              | -1.99 | 0.327 | -1.1  | 0.741 | -1.15 | 0.456 | 1.09  | 0.778 | -0.79 |
| 1438251_x_at | Htra1             | HtrA serine peptidase 1                                                              | -1.17 | 0.093 | -2.87 | 0.027 | 1.08  | 0.764 | -1.71 | 0.218 | -1.17 |
| 1456049_at   | Rala              | v-ral simian leukemia viral oncogene homolog A (ras related)                         | 1.08  | 0.912 | -1.6  | 0.481 | -1.71 | 0.276 | -1.9  | 0.315 | -1.03 |
| 1426153_a_at | Dsg2              | desmoglein 2                                                                         | -1.42 | 0.503 | -2.7  | 0.4   | 1.21  | 0.775 | -1.36 | 0.033 | -1.07 |
| 1455961_at   | ---               | ---                                                                                  | 1.01  | 0.949 | -2.14 | 0.099 | -1.23 | 0.067 | -1.43 | 0.158 | -0.95 |
| 1437781_at   | ---               | Transcribed locus                                                                    | -1.3  | 0.183 | 1     | 0.996 | -1.94 | 0.051 | -2.16 | 0.533 | -1.1  |
| 1442389_at   | Oas1f             | 2'-5' oligoadenylate synthetase 1F                                                   | -1.62 | 0.267 | -1.81 | 0.252 | 1.11  | 0.889 | -1.56 | 0.323 | -0.97 |
| 1444593_at   | Phlpp1            | PH domain and leucine rich repeat protein phosphatase-like                           | -1.35 | 0.589 | -1.08 | 0.867 | -1.6  | 0.082 | 1.61  | 0.196 | -0.61 |
| 1453727_at   | 2610101J03Rik     | RIKEN cDNA 2610101J03 gene                                                           | -1.49 | 0.288 | -1.36 | 0.193 | -1.14 | 0.202 | 1.09  | 0.77  | -0.72 |
| 1447670_at   | Psmc9             | proteasome (prosome, macropain) 26S subunit, non-ATPase, 9                           | -1.34 | 0.531 | -1.18 | 0.486 | -1.44 | 0.105 | 1.04  | 0.907 | -0.73 |
| 1446918_at   | Lphn3             | Latrophilin 3                                                                        | -2.98 | 0.022 | 1.28  | 0.008 | -1.49 | 0.269 | -1.42 | 0.245 | -1.15 |
| 1456315_a_at | Ptpla             | protein tyrosine phosphatase-like (proline instead of catalytic arginine), member ε  | -1.4  | 0.003 | -1.16 | 0.126 | -1.41 | 0.079 | 2.69  | 0.254 | -0.32 |
| 1429274_at   | 2310010M24Rik     | RIKEN cDNA 2310010M24 gene                                                           | 1.13  | 0.625 | -1.91 | 0.323 | -1.59 | 0.24  | -2.44 | 0.02  | -1.2  |
| 1441030_at   | Rai14             | retinoic acid induced 14                                                             | -1.16 | 0.686 | 1.01  | 0.968 | -2.43 | 0.006 | -1.78 | 0.099 | -1.09 |
| 1439652_at   | ---               | ---                                                                                  | 1.01  | 0.962 | -1.25 | 0.022 | -2.08 | 0.03  | -1.73 | 0.113 | -1.01 |
| 1457534_at   | Ubap2l            | Ubiquitin associated protein 2-like                                                  | 1.02  | 0.934 | -1.44 | 0.214 | -1.74 | 0.014 | -1.02 | 0.946 | -0.8  |
| 1449080_at   | Hdac2             | histone deacetylase 2                                                                | -1.24 | 0.287 | -1.24 | 0.256 | -1.48 | 0.043 | 1.01  | 0.957 | -0.74 |
| 1442843_at   | 4933411D12Rik     | RIKEN cDNA 4933411D12 gene                                                           | -1.34 | 0.029 | -1.1  | 0.527 | -1.6  | 0.02  | 2.42  | 0.24  | -0.4  |
| 1441042_at   | Fgf1              | fibroblast growth factor 1                                                           | -1.1  | 0.498 | -1.31 | 0.155 | -1.63 | 0.022 | 1.03  | 0.963 | -0.75 |
| 1436328_at   | Rnmt              | RNA (guanine-7-) methyltransferase                                                   | -1.12 | 0.41  | -1.39 | 0.146 | -1.47 | 0.05  | 1.02  | 0.848 | -0.74 |
| 1440677_at   | LOC245305         | similar to hypothetical protein FLJ38281                                             | -1.8  | 0.511 | -1.6  | 0.305 | 1.11  | 0.784 | -1.11 | 0.684 | -0.85 |
| 1434915_s_at | Lrrc19            | leucine rich repeat containing 19                                                    | -1.41 | 0.189 | -1.38 | 0.622 | -1.17 | 0.761 | 1.14  | 0.854 | -0.71 |
| 1434772_at   | Adora2b           | adenosine A2b receptor                                                               | -1.67 | 0.35  | -1.26 | 0.727 | -1.12 | 0.589 | 1.32  | 0.703 | -0.68 |
| 1449919_at   | Krtap6-2          | keratin associated protein 6-2                                                       | -1    | 0.998 | -1.25 | 0.65  | -2.04 | 0.245 | 1.5   | 0.442 | -0.7  |
| 1448186_at   | Pnliprp2          | pancreatic lipase-related protein 2                                                  | -1.42 | 0.206 | -1.39 | 0.393 | -1.15 | 0.712 | 1.22  | 0.676 | -0.69 |
| 1434197_at   | Atrn              | attractin                                                                            | -1.46 | 0.038 | -1.37 | 0.004 | -1.14 | 0.438 | 1.22  | 0.531 | -0.69 |
| 1421782_a_at | Smr2              | submaxillary gland androgen regulated protein 2                                      | -1.56 | 0.25  | -1.21 | 0.628 | -1.22 | 0.641 | 1.01  | 0.989 | -0.74 |
| 1433270_at   | 9530004M16Rik     | RIKEN cDNA 9530004M16 gene                                                           | -1.2  | 0.026 | -1.43 | 0.054 | -1.32 | 0.598 | 1.09  | 0.902 | -0.71 |

|              |                      |                                                                                       |       |       |       |       |       |       |       |       |       |
|--------------|----------------------|---------------------------------------------------------------------------------------|-------|-------|-------|-------|-------|-------|-------|-------|-------|
| 1456831_at   | Arid5b               | AT rich interactive domain 5B (Mrf1 like)                                             | 1     | 0.985 | -1.83 | 0.12  | -1.36 | 0.281 | -1.87 | 0.015 | -1.01 |
| 1457131_at   | Fry                  | furry homolog (Drosophila)                                                            | -2.44 | 0.084 | -1.99 | 0.332 | 1.38  | 0.253 | -1.06 | 0.848 | -1.03 |
| 1450239_at   | Glr3                 | glycine receptor, alpha 3 subunit                                                     | -3.08 | 0.451 | 1.13  | 0.682 | -1.2  | 0.254 | -1.37 | 0.638 | -1.13 |
| 1441736_at   | Itfg1                | Integrin alpha FG-GAP repeat containing 1                                             | -1.27 | 0.239 | -1.24 | 0.506 | -1.44 | 0.105 | 1.11  | 0.551 | -0.71 |
| 1431427_at   | 5430427M07Rik        | RIKEN cDNA 5430427M07 gene                                                            | -1.53 | 0.483 | -1.22 | 0.679 | -1.23 | 0.274 | 1.2   | 0.768 | -0.69 |
| 1446878_at   | Lonrf2               | LON peptidase N-terminal domain and ring finger 2                                     | 1     | 0.997 | -2.07 | 0.297 | -1.25 | 0.496 | -1.31 | 0.569 | -0.91 |
| 1441883_at   | 0610010012Rik        | RIKEN cDNA 0610010012 gene                                                            | -1.05 | 0.669 | -1.92 | 0.014 | -1.22 | 0.075 | 2.58  | 0.227 | -0.4  |
| 1438139_at   | Arhgap28             | Rho GTPase activating protein 28                                                      | -1.68 | 0.476 | -1.85 | 0.093 | 1.15  | 0.595 | -1.67 | 0.491 | -1.01 |
| 1453227_at   | Rhobtb3              | Rho-related BTB domain containing 3                                                   | -1.25 | 0.464 | -1.43 | 0.263 | -1.26 | 0.627 | 2.89  | 0.001 | -0.26 |
| 1458423_at   | Luc7l2               | LUC7-like 2 (S. cerevisiae)                                                           | 1.14  | 0.859 | -2.22 | 0.31  | -1.42 | 0.105 | -2.2  | 0.237 | -1.18 |
| 1424228_at   | Polr3h               | polymerase (RNA) III (DNA directed) polypeptide H                                     | -1.25 | 0.623 | -1.52 | 0.273 | -1.21 | 0.129 | 1.07  | 0.871 | -0.73 |
| 1419429_at   | Cntfr                | ciliary neurotrophic factor receptor                                                  | -2.18 | 0.001 | -1.76 | 0.113 | 1.26  | 0.627 | -1.09 | 0.701 | -0.94 |
| 1444434_at   | Wdr33                | WD repeat domain 33                                                                   | -1.15 | 0.688 | -2.08 | 0.262 | -1.06 | 0.92  | 1.53  | 0.318 | -0.69 |
| 1450263_at   | Pcdhb5               | protocadherin beta 5                                                                  | -1.78 | 0.28  | -1.27 | 0.498 | -1.06 | 0.911 | 2.19  | 0.19  | -0.48 |
| 1434030_at   | BC034507             | cDNA sequence BC034507                                                                | -1.16 | 0.136 | -1.46 | 0.193 | -1.35 | 0.024 | 1.03  | 0.862 | -0.73 |
| 1459880_at   | Hnnpab               | heterogeneous nuclear ribonucleoprotein A/B                                           | -1.08 | 0.864 | -1.96 | 0.017 | -1.17 | 0.619 | 1.59  | 0.124 | -0.65 |
| 1454129_at   | 4933416M06Rik        | RIKEN cDNA 4933416M06 gene                                                            | -1.08 | 0.172 | -1.59 | 0.244 | -1.36 | 0.593 | 1.09  | 0.887 | -0.74 |
| 1442102_at   | Aco2                 | Aconitase 2, mitochondrial                                                            | -1.16 | 0.544 | -1.43 | 0.316 | -1.36 | 0.062 | 1.09  | 0.692 | -0.72 |
| 1441534_at   | C86753               | expressed sequence C86753                                                             | -2.41 | 0.051 | 1.06  | 0.754 | -1.23 | 0.749 | -1.08 | 0.857 | -0.91 |
| 1449611_at   | Cd82                 | CD82 antigen                                                                          | -2.8  | 0.143 | 1.06  | 0.852 | -1.14 | 0.726 | -1.22 | 0.577 | -1.03 |
| 1458953_at   | D5Ert215e            | DNA segment, Chr 5, ERATO Doi 215, expressed                                          | -1.36 | 0.424 | -2.08 | 0.496 | 1.07  | 0.902 | -1.11 | 0.665 | -0.87 |
| 1435489_at   | LOC552912            | hypothetical LOC552912                                                                | -1.14 | 0.679 | -1.96 | 0.139 | -1.11 | 0.711 | 1.05  | 0.778 | -0.79 |
| 1444896_at   | ---                  | ---                                                                                   | -2.01 | 0.206 | -1.27 | 0.601 | 1.01  | 0.99  | -1.05 | 0.914 | -0.83 |
| 1456286_at   | Cog3                 | Component of oligomeric golgi complex 3                                               | -1.37 | 0.015 | -1.19 | 0.195 | -1.39 | 0.126 | 1.03  | 0.898 | -0.73 |
| 1429096_at   | 2810455D13Rik        | RIKEN cDNA 2810455D13 gene                                                            | -1.32 | 0.315 | -1.18 | 0.42  | -1.45 | 0.202 | 1.21  | 0.519 | -0.69 |
| 1420421_s_at | Klr1b1b              | killer cell lectin-like receptor subfamily B member 1B                                | -1.07 | 0.933 | -1.02 | 0.864 | -2.62 | 0.012 | 1.22  | 0.405 | -0.87 |
| 1435282_at   | Gm967                | gene model 967, (NCBI)                                                                | -1.2  | 0.255 | -1.6  | 0.016 | -1.2  | 0.268 | 1.2   | 0.435 | -0.7  |
| 1439315_at   | LOC628919            | Similar to shroom                                                                     | -1.69 | 0.397 | 1.11  | 0.78  | -1.69 | 0.374 | -2.42 | 0.209 | -1.17 |
| 1432785_at   | A930028O11Rik        | RIKEN cDNA A930028O11 gene                                                            | 1.28  | 0.372 | -2.73 | 0.277 | -1.55 | 0.387 | -1.36 | 0.201 | -1.09 |
| 1460137_at   | Fgf12                | Fibroblast growth factor 12                                                           | -2.36 | 0.411 | -1.09 | 0.851 | -1.05 | 0.891 | 1.78  | 0.4   | -0.68 |
| 1445970_at   | AU022526             | expressed sequence AU022526                                                           | -1.5  | 0.561 | -1.62 | 0.329 | 1.01  | 0.988 | -1.13 | 0.775 | -0.81 |
| 1438752_at   | A230058F20Rik        | RIKEN cDNA A230058F20 gene                                                            | -1.4  | 0.004 | 1.18  | 0.744 | -2.5  | 0.243 | -1.23 | 0.511 | -0.99 |
| 1438471_at   | Wtap                 | Wilms' tumour 1-associating protein                                                   | 1.01  | 0.977 | -1.52 | 0.5   | -1.6  | 0.039 | -1.24 | 0.578 | -0.84 |
| 1417838_at   | Ssty2 /// LOC38213   | spermiogenesis specific transcript on the Y 2 /// similar to RIKEN cDNA 1700029I      | -1.37 | 0.714 | -2.26 | 0.169 | 1.12  | 0.616 | -1.25 | 0.64  | -0.94 |
| 1455931_at   | Chrna3               | cholinergic receptor, nicotinic, alpha polypeptide 3                                  | -2.13 | 0.498 | -1.53 | 0.37  | 1.17  | 0.457 | -1.09 | 0.666 | -0.89 |
| 1446443_at   | B230213L16Rik        | RIKEN cDNA B230213L16 gene                                                            | -1.39 | 0.124 | -1.35 | 0.102 | -1.2  | 0.471 | 1.04  | 0.781 | -0.73 |
| 1445185_at   | Ttl10                | tubulin tyrosine ligase-like family, member 10                                        | -2.44 | 0.525 | -1.92 | 0.301 | 1.36  | 0.313 | -1.05 | 0.897 | -1.01 |
| 1429109_at   | Msl2l1               | male-specific lethal 2-like 1 (Drosophila)                                            | -1.73 | 0.536 | -1.56 | 0.385 | 1.07  | 0.858 | -1.22 | 0.747 | -0.86 |
| 1436835_at   | Crk                  | v-crk sarcoma virus CT10 oncogene homolog (avian)                                     | -1.15 | 0.844 | -1.38 | 0.133 | -1.44 | 0.286 | 1.25  | 0.091 | -0.68 |
| 1450484_a_at | Tyki                 | thymidylate kinase family LPS-inducible member                                        | -1.36 | 0.19  | -1.48 | 0.137 | -1.13 | 0.428 | 1.64  | 0.292 | -0.58 |
| 1436653_at   | 4833401D15Rik        | RIKEN cDNA 4833401D15 gene                                                            | -1.73 | 0.559 | -1.59 | 0.204 | 1.09  | 0.661 | -1.21 | 0.432 | -0.86 |
| 1459180_at   | ---                  | Transcribed locus                                                                     | -1.39 | 0.719 | -2.39 | 0.071 | 1.16  | 0.704 | -1.21 | 0.607 | -0.96 |
| 1441379_at   | AU045094             | expressed sequence AU045094                                                           | 1.44  | 0.373 | -2.51 | 0.219 | -2.18 | 0.323 | -2.68 | 0.272 | -1.48 |
| 1453046_at   | LOC623215            | similar to diacylglycerol kinase, eta isoform 2                                       | -2.63 | 0.292 | -1.03 | 0.918 | -1.06 | 0.913 | 1.91  | 0.355 | -0.7  |
| 1451677_at   | Narf                 | nuclear prelamin A recognition factor                                                 | -1.11 | 0.704 | -1.18 | 0.594 | -1.83 | 0.374 | 3.93  | 0.287 | -0.05 |
| 1418366_at   | Hist2h3c1 /// Hist2h | histone 2, H3c1 /// histone 2, H2aa1 /// histone 1, H2ad /// histone 1, H2an /// hist | -1.37 | 0.295 | -1.39 | 0.152 | -1.19 | 0.319 | 1.34  | 0.518 | -0.65 |
| 1440112_at   | Lrrtm3               | leucine rich repeat transmembrane neuronal 3                                          | -1.32 | 0.765 | -1.54 | 0.128 | -1.13 | 0.813 | 2.09  | 0.029 | -0.47 |
| 1424499_s_at | 5730596K20Rik        | RIKEN cDNA 5730596K20 gene                                                            | -1.12 | 0.271 | -1.9  | 0.147 | -1.14 | 0.185 | 1.37  | 0.381 | -0.7  |
| 1456416_at   | Cbfa2t2h             | core-binding factor, runt domain, alpha subunit 2, translocated to, 2 homolog (hur    | -1.58 | 0.315 | 1.01  | 0.991 | -1.53 | 0.1   | -1.13 | 0.435 | -0.81 |
| 1431658_at   | Hist1h4j             | histone 1, H4j                                                                        | -1.46 | 0.576 | -1.17 | 0.549 | -1.33 | 0.499 | 2.26  | 0.232 | -0.42 |
| 1451634_at   | 2810051F02Rik        | RIKEN cDNA 2810051F02 gene                                                            | 1.02  | 0.939 | -1.6  | 0.12  | -1.55 | 0.079 | -1.07 | 0.668 | -0.8  |
| 1449631_at   | Eno3                 | Enolase 3, beta muscle                                                                | -1.56 | 0.216 | -1.44 | 0.443 | -1.04 | 0.84  | 1.32  | 0.228 | -0.68 |
| 1451996_at   | Tm2d1                | TM2 domain containing 1                                                               | -1.38 | 0.092 | -1.14 | 0.211 | -1.44 | 0.043 | 1.01  | 0.902 | -0.74 |

|              |               |                                                                               |       |       |        |       |       |       |       |       |        |
|--------------|---------------|-------------------------------------------------------------------------------|-------|-------|--------|-------|-------|-------|-------|-------|--------|
| 1432714_at   | 6430709C05Rik | RIKEN cDNA 6430709C05 gene                                                    | -2.22 | 0.292 | 1.29   | 0.703 | -1.81 | 0.302 | -3.05 | 0.111 | -1.44  |
| 1430400_at   | 4930521A18Rik | RIKEN cDNA 4930521A18 gene                                                    | 1.04  | 0.915 | -1.28  | 0.616 | -2.12 | 0.048 | -1.59 | 0.497 | -0.99  |
| 1416136_at   | Mmp2          | matrix metalloproteinase 2                                                    | -1.01 | 0.872 | -1.22  | 0.137 | -2.04 | 0.06  | 1.68  | 0.012 | -0.65  |
| 1445263_at   | Cst7          | Cystatin F (leukocystatin)                                                    | -1.18 | 0.268 | -1.34  | 0.009 | -1.43 | 0.167 | 1.23  | 0.355 | -0.68  |
| 1449844_at   | Slco1a1       | solute carrier organic anion transporter family, member 1a1                   | 1.53  | 0.058 | -58.47 | 0.077 | -1.33 | 0.393 | -1.04 | 0.946 | -14.83 |
| 1443069_at   | Prkca         | Protein kinase C, alpha                                                       | -1.19 | 0.467 | -1.41  | 0.108 | -1.34 | 0.119 | 1.14  | 0.577 | -0.7   |
| 1439064_at   | BC030046      | cDNA sequence BC030046                                                        | -1.82 | 0.524 | -1.38  | 0.536 | 1.02  | 0.958 | -1.52 | 0.524 | -0.93  |
| 1443614_at   | ---           | Transcribed locus                                                             | 1.04  | 0.927 | -1.54  | 0.507 | -1.64 | 0.141 | -1.21 | 0.808 | -0.84  |
| 1440554_at   | ---           | ---                                                                           | -1.31 | 0.331 | -1.11  | 0.386 | -1.59 | 0.019 | 1.28  | 0.377 | -0.68  |
| 1433618_at   | C330006A16Rik | RIKEN cDNA C330006A16 gene                                                    | -1.72 | 0.472 | -1.51  | 0.384 | 1.05  | 0.874 | -1.02 | 0.957 | -0.8   |
| 1421100_a_at | Dab1          | disabled homolog 1 (Drosophila)                                               | -1.58 | 0.495 | 1.07   | 0.911 | -1.69 | 0.228 | -2.17 | 0.31  | -1.09  |
| 1442427_at   | 9630026M06Rik | RIKEN cDNA 9630026M06 gene                                                    | -1.3  | 0.308 | -1.14  | 0.386 | -1.55 | 0.021 | 1.13  | 0.627 | -0.71  |
| 1432609_at   | ---           | ---                                                                           | -1.55 | 0.515 | -1.99  | 0.237 | 1.15  | 0.346 | -1.16 | 0.082 | -0.89  |
| 1427538_at   | Zfp369        | zinc finger protein 369                                                       | -2.42 | 0.356 | 1.17   | 0.633 | -1.39 | 0.469 | -1.25 | 0.651 | -0.98  |
| 1449270_at   | Plxdc2        | plexin domain containing 2                                                    | -1.14 | 0.715 | -1.16  | 0.547 | -1.8  | 0.035 | 1.58  | 0.116 | -0.63  |
| 1439698_at   | Zfp276        | Zinc finger protein (C2H2 type) 276                                           | -1.35 | 0.216 | -2.46  | 0.161 | 1.15  | 0.79  | -1.42 | 0.275 | -1.02  |
| 1454251_at   | 1700034J04Rik | RIKEN cDNA 1700034J04 gene                                                    | -1.87 | 0.208 | -1.18  | 0.274 | -1.09 | 0.85  | 1.46  | 0.58  | -0.67  |
| 1424969_s_at | ---           | ---                                                                           | -1.32 | 0.726 | -1.21  | 0.667 | -1.4  | 0.62  | 1.03  | 0.938 | -0.73  |
| 1444119_at   | B930006L02Rik | RIKEN cDNA B930006L02 gene                                                    | -1.14 | 0.548 | -1.1   | 0.635 | -1.93 | 0.012 | 1.31  | 0.289 | -0.72  |
| 1433054_at   | Itgb2l        | integrin beta 2-like                                                          | -1.61 | 0.212 | -1.22  | 0.813 | -1.17 | 0.735 | 1.19  | 0.706 | -0.7   |
| 1429702_at   | 2900072G11Rik | RIKEN cDNA 2900072G11 gene                                                    | -1.18 | 0.305 | 1.02   | 0.902 | -2.34 | 0.025 | -1.28 | 0.103 | -0.94  |
| 1419425_at   | Cnr1          | cannabinoid receptor 1 (brain)                                                | -1.32 | 0.643 | -1.1   | 0.538 | -1.58 | 0.001 | 1.48  | 0.122 | -0.63  |
| 1453538_at   | A330102K23Rik | RIKEN cDNA A330102K23 gene                                                    | -1.59 | 0.458 | -1.01  | 0.988 | -1.47 | 0.555 | 1.02  | 0.962 | -0.76  |
| 1420570_x_at | Tcl1b3        | T-cell leukemia/lymphoma 1B, 3                                                | -1.69 | 0.265 | -1.29  | 0.488 | -1.07 | 0.829 | 1.37  | 0.598 | -0.67  |
| 1439925_at   | Tm4sf1        | transmembrane 4 superfamily member 1                                          | -1.05 | 0.813 | -1.48  | 0.328 | -1.5  | 0.03  | 1.04  | 0.89  | -0.74  |
| 1416745_x_at | Uap1          | UDP-N-acetylglucosamine pyrophosphorylase 1                                   | -1.05 | 0.766 | -1.55  | 0.37  | -1.42 | 0.139 | 2     | 0.185 | -0.51  |
| 1425362_at   | Hrbl          | HIV-1 Rev binding protein-like                                                | -1.44 | 0.329 | -1.05  | 0.743 | -1.54 | 0.009 | 1.91  | 0.357 | -0.53  |
| 1447695_at   | 2610035D17Rik | RIKEN cDNA 2610035D17 gene                                                    | -1.2  | 0.356 | -1.1   | 0.47  | -1.79 | 0.113 | 1.36  | 0.649 | -0.68  |
| 1440718_at   | BC052328      | cDNA sequence BC052328                                                        | 1.31  | 0.471 | -2.44  | 0.203 | -1.72 | 0.298 | -1.34 | 0.714 | -1.05  |
| 1459948_at   | Ghr           | Growth hormone receptor                                                       | 1.19  | 0.222 | -1.87  | 0.09  | -1.75 | 0.08  | -1.09 | 0.687 | -0.88  |
| 1447751_x_at | Dus2l         | dihydrouridine synthase 2-like (SMM1, S. cerevisiae)                          | -3.64 | 0.098 | -1.04  | 0.928 | 1.06  | 0.892 | -3.76 | 0.019 | -1.84  |
| 1453011_at   | Bdh2          | 3-hydroxybutyrate dehydrogenase, type 2                                       | -1.14 | 0.438 | -1.04  | 0.91  | -2.17 | 0.133 | 1.05  | 0.955 | -0.82  |
| 1440259_at   | Man1a2        | Mannosidase, alpha, class 1A, member 2                                        | 1     | 0.99  | -1.41  | 0.206 | -1.7  | 0.019 | -1.24 | 0.137 | -0.84  |
| 1445254_at   | ---           | ---                                                                           | -1.02 | 0.944 | -1.26  | 0.378 | -1.9  | 0.159 | 3.01  | 0.24  | -0.29  |
| 1429139_at   | Otd7b         | OTU domain containing 7B                                                      | -1.09 | 0.755 | -1.57  | 0.074 | -1.34 | 0.434 | 1.02  | 0.937 | -0.75  |
| 1459738_x_at | ---           | ---                                                                           | -1.31 | 0.633 | -1.29  | 0.542 | -1.32 | 0.133 | 1.06  | 0.935 | -0.71  |
| 1452017_at   | Sox15         | SRY-box containing gene 15                                                    | 1.08  | 0.446 | -2.24  | 0.267 | -1.3  | 0.526 | -1.78 | 0.273 | -1.06  |
| 1432431_s_at | 2900006F19Rik | RIKEN cDNA 2900006F19 gene                                                    | -1.22 | 0.064 | -1.12  | 0.477 | -1.71 | 0.019 | 1.45  | 0.476 | -0.65  |
| 1449456_a_at | Cma1          | chymase 1, mast cell                                                          | -1.47 | 0.239 | -1.68  | 0.264 | 1.03  | 0.94  | -1.04 | 0.891 | -0.79  |
| 1442996_x_at | ---           | 0 day neonate kidney cDNA, RIKEN full-length enriched library, clone:D630027M | 1     | 0.992 | -1.26  | 0.195 | -2    | 0.005 | -1.13 | 0.673 | -0.84  |
| 1458939_at   | Synj2bp       | Synaptojanin 2 binding protein                                                | -1.17 | 0.612 | -1.55  | 0.33  | -1.25 | 0.63  | 1.26  | 0.479 | -0.68  |
| 1439461_x_at | 2410003A14Rik | RIKEN cDNA 2410003A14 gene                                                    | -1.38 | 0.199 | -1.21  | 0.244 | -1.33 | 0.213 | 1.14  | 0.593 | -0.7   |
| 1417708_at   | Syt3          | synaptotagmin III                                                             | -1.49 | 0.257 | -1.14  | 0.767 | -1.33 | 0.226 | 1.35  | 0.372 | -0.65  |
| 1441822_at   | 1700008F19Rik | RIKEN cDNA 1700008F19 gene                                                    | -1.22 | 0.688 | -2.29  | 0.048 | 1.04  | 0.801 | -2.66 | 0.058 | -1.28  |
| 1439533_at   | 1700125D06Rik | RIKEN cDNA 1700125D06 gene                                                    | -1.49 | 0.263 | -1.1   | 0.724 | -1.39 | 0.127 | 1.3   | 0.065 | -0.67  |
| 1439201_at   | Usp14         | ubiquitin specific peptidase 14                                               | -1.39 | 0.106 | -1.49  | 0.046 | -1.1  | 0.711 | 1.44  | 0.283 | -0.64  |
| 1422162_at   | Dcc           | deleted in colorectal carcinoma                                               | -1.16 | 0.617 | 1.04   | 0.905 | -2.51 | 0.006 | -1.57 | 0.262 | -1.05  |
| 1458070_at   | Vtcr1         | V-set domain containing T cell activation inhibitor 1                         | -1.03 | 0.861 | -2.77  | 0.126 | -1.03 | 0.935 | 1.11  | 0.708 | -0.93  |
| 1436513_at   | Tanc2         | tetratricopeptide repeat, ankyrin repeat and coiled-coil containing 2         | -1.18 | 0.607 | -1.39  | 0.023 | -1.36 | 0.216 | 1.09  | 0.672 | -0.71  |
| 1444938_at   | ---           | Transcribed locus                                                             | -1.51 | 0.405 | -2.59  | 0.248 | 1.25  | 0.692 | -1.37 | 0.586 | -1.05  |
| 1443245_at   | ---           | ---                                                                           | 1.32  | 0.731 | -2.15  | 0.19  | -1.95 | 0.199 | -1.02 | 0.928 | -0.95  |
| 1439249_at   | Wac           | WW domain containing adaptor with coiled-coil                                 | -1.49 | 0.377 | -1.14  | 0.675 | -1.32 | 0.23  | 1.29  | 0.387 | -0.67  |
| 1439053_at   | D10Bwg1070e   | DNA segment, Chr 10, Brigham & Women's Genetics 1070 expressed                | 1.09  | 0.913 | -2.13  | 0.033 | -1.34 | 0.214 | -1.41 | 0.116 | -0.95  |

|              |               |                                                                               |       |       |       |       |       |       |       |       |       |
|--------------|---------------|-------------------------------------------------------------------------------|-------|-------|-------|-------|-------|-------|-------|-------|-------|
| 1435594_at   | Arl6ip2       | ADP-ribosylation factor-like 6 interacting protein 2                          | -1.16 | 0.522 | -1.25 | 0.305 | -1.56 | 0.227 | 1.39  | 0.511 | -0.65 |
| 1450854_at   | Pa2g4         | proliferation-associated 2G4                                                  | -1.56 | 0.188 | -1.3  | 0.147 | -1.12 | 0.304 | 1.78  | 0.183 | -0.55 |
| 1447254_at   | ---           | ---                                                                           | -1.28 | 0.589 | -1.51 | 0.555 | -1.16 | 0.405 | 1.5   | 0.113 | -0.61 |
| 1458970_at   | Rad50         | RAD50 homolog (S. cerevisiae)                                                 | -3.62 | 0.002 | -1.23 | 0.366 | 1.21  | 0.335 | -1.03 | 0.903 | -1.17 |
| 1444973_at   | Kcnma1        | Potassium large conductance calcium-activated channel, subfamily M, alpha mer | 1.03  | 0.858 | -1.81 | 0.233 | -1.39 | 0.066 | -1.26 | 0.03  | -0.86 |
| 1457017_at   | ---           | ---                                                                           | -1.52 | 0.415 | 1     | 0.988 | -1.56 | 0.087 | -1.54 | 0.273 | -0.9  |
| 1421449_at   | Csmd1         | CUB and Sushi multiple domains 1                                              | -1.12 | 0.874 | -1.28 | 0.691 | -1.59 | 0.452 | 1.19  | 0.696 | -0.7  |
| 1457584_at   | AI848100      | expressed sequence AI848100                                                   | -1.37 | 0.263 | -1.12 | 0.767 | -1.46 | 0.293 | 1.06  | 0.808 | -0.72 |
| 1432082_at   | 4933436I20Rik | RIKEN cDNA 4933436I20 gene                                                    | -3.09 | 0.301 | 1.08  | 0.838 | -1.12 | 0.729 | -2.01 | 0.255 | -1.28 |
| 1440985_at   | D130023J23Rik | RIKEN cDNA D130023J23 gene                                                    | -1.38 | 0.295 | -1.11 | 0.835 | -1.48 | 0.313 | 1.01  | 0.956 | -0.74 |
| 1442908_at   | Tm9sf1        | Transmembrane 9 superfamily member 1                                          | -1.38 | 0.099 | -2.06 | 0.328 | 1.1   | 0.689 | -1.08 | 0.756 | -0.86 |
| 1456706_at   | 4833441D16Rik | RIKEN cDNA 4833441D16 gene                                                    | -1.2  | 0.297 | -1.04 | 0.76  | -1.96 | 0.008 | 1.01  | 0.977 | -0.8  |
| 1429747_at   | 1700009N14Rik | RIKEN cDNA 1700009N14 gene                                                    | -1.5  | 0.065 | -1.27 | 0.445 | -1.17 | 0.72  | 2.51  | 0.006 | -0.36 |
| 1426325_at   | Kif1c         | kinesin family member 1C                                                      | -1.45 | 0.508 | -2.88 | 0.014 | 1.27  | 0.617 | -1.22 | 0.694 | -1.07 |
| 1436561_at   | Suv39h2       | suppressor of variegation 3-9 homolog 2 (Drosophila)                          | -1.85 | 0.349 | -1.19 | 0.76  | -1.08 | 0.85  | 6.55  | 0.097 | 0.61  |
| 1427690_a_at | Tpte          | transmembrane phosphatase with tensin homology                                | 1.1   | 0.767 | -2.31 | 0.097 | -1.3  | 0.435 | -1.93 | 0.185 | -1.11 |
| 1436933_at   | Akap13        | A kinase (PRKA) anchor protein 13                                             | -1.23 | 0.167 | -1.2  | 0.487 | -1.52 | 0.011 | 1.16  | 0.492 | -0.7  |
| 1446604_at   | ---           | ---                                                                           | -1.5  | 0.316 | -1.32 | 0.165 | -1.13 | 0.535 | 1.07  | 0.875 | -0.72 |
| 1431923_at   | 2810401C16Rik | RIKEN cDNA 2810401C16 gene                                                    | -1.22 | 0.504 | -1.61 | 0.469 | -1.16 | 0.766 | 1.13  | 0.114 | -0.71 |
| 1454199_at   | 1700014N06Rik | RIKEN cDNA 1700014N06 gene                                                    | 1.06  | 0.619 | -2.26 | 0.104 | -1.24 | 0.421 | -1.49 | 0.611 | -0.98 |
| 1438720_at   | 9330159F19Rik | RIKEN cDNA 9330159F19 gene                                                    | 1.07  | 0.857 | -1.46 | 0.301 | -1.81 | 0.232 | -2.45 | 0.11  | -1.16 |
| 1429685_at   | C030002O17Rik | RIKEN cDNA C030002O17 gene                                                    | -1.09 | 0.677 | -1.43 | 0.572 | -1.45 | 0.256 | 1.23  | 0.8   | -0.69 |
| 1438592_at   | Nek1          | NIMA (never in mitosis gene a)-related expressed kinase 1                     | -1.19 | 0.161 | -1.31 | 0.204 | -1.42 | 0.01  | 1.1   | 0.769 | -0.71 |
| 1435227_at   | ---           | ---                                                                           | -1.49 | 0.03  | -2.33 | 0.334 | 1.2   | 0.456 | -2.3  | 0.153 | -1.23 |
| 1432964_at   | 2410049M19Rik | RIKEN cDNA 2410049M19 gene                                                    | -1.49 | 0.003 | 1.06  | 0.941 | -1.73 | 0.198 | -1.91 | 0.375 | -1.02 |
| 1455057_at   | Gmps          | guanine monphosphate synthetase                                               | -1.12 | 0.565 | -1.44 | 0.06  | -1.39 | 0.048 | 1.01  | 0.959 | -0.74 |
| 1452696_a_at | 4933439C10Rik | RIKEN cDNA 4933439C10 gene                                                    | 1.01  | 0.863 | -1.97 | 0.154 | -1.26 | 0.23  | -1.73 | 0.16  | -0.99 |
| 1435120_at   | ---           | Transcribed locus                                                             | 1.12  | 0.389 | -1.51 | 0.039 | -1.9  | 0.039 | -1.13 | 0.58  | -0.86 |
| 1441517_at   | Spred1        | Sprouty protein with EVH-1 domain 1, related sequence                         | -1.19 | 0.442 | -1.42 | 0.391 | -1.32 | 0.396 | 1.42  | 0.593 | -0.63 |
| 1432292_at   | 4930504C09Rik | RIKEN cDNA 4930504C09 gene                                                    | -2.1  | 0.341 | -1.51 | 0.439 | 1.17  | 0.724 | -1.85 | 0.072 | -1.07 |
| 1446913_at   | ---           | ---                                                                           | -1.31 | 0.695 | -1.04 | 0.954 | -1.73 | 0.235 | 1.51  | 0.503 | -0.64 |
| 1424558_a_at | Cabyr         | calcium-binding tyrosine-(Y)-phosphorylation regulated (fibrousheathin 2)     | -1.27 | 0.291 | -1.17 | 0.589 | -1.52 | 0.09  | 1.47  | 0.45  | -0.62 |
| 1443470_at   | A530058N18Rik | RIKEN cDNA A530058N18 gene                                                    | -1.62 | 0.607 | -1.2  | 0.788 | -1.17 | 0.587 | 2.77  | 0.357 | -0.3  |
| 1458811_at   | 9430047L24Rik | RIKEN cDNA 9430047L24 gene                                                    | -1.05 | 0.943 | -1.31 | 0.67  | -1.68 | 0.241 | 2.04  | 0.207 | -0.5  |
| 1429913_at   | Kcnk16        | potassium channel, subfamily K, member 16                                     | -4.45 | 0.002 | -2.85 | 0.056 | 1.73  | 0.364 | -1.12 | 0.867 | -1.67 |
| 1431432_at   | Cfl2          | cofilin 2, muscle                                                             | -1.09 | 0.836 | -1.66 | 0.293 | -1.27 | 0.057 | 1     | 0.998 | -0.76 |
| 1451441_at   | 2210415F13Rik | RIKEN cDNA 2210415F13 gene                                                    | -1.67 | 0.186 | -1.03 | 0.95  | -1.36 | 0.322 | 1.82  | 0.474 | -0.56 |
| 1449584_at   | Dgkg          | diacylglycerol kinase, gamma                                                  | -1.05 | 0.561 | -2.48 | 0.008 | -1.05 | 0.639 | 1.21  | 0.303 | -0.84 |
| 1436274_at   | ---           | Transcribed locus                                                             | -1.26 | 0.602 | -2.32 | 0.232 | 1.09  | 0.867 | -1.24 | 0.741 | -0.94 |
| 1458309_at   | ---           | Transcribed locus                                                             | -1.2  | 0.387 | -1.1  | 0.524 | -1.75 | 0.01  | 1.11  | 0.694 | -0.74 |
| 1423485_at   | Rad54l2       | Rad54 like 2 (S. cerevisiae)                                                  | -2    | 0.58  | -1.32 | 0.561 | 1.05  | 0.864 | -1.52 | 0.373 | -0.95 |
| 1454364_at   | 9530025L08Rik | RIKEN cDNA 9530025L08 gene                                                    | -1.47 | 0.238 | -1.12 | 0.555 | -1.36 | 0.592 | 1.54  | 0.161 | -0.6  |
| 1447416_at   | Gm239         | gene model 239, (NCBI)                                                        | -1.45 | 0.211 | -1.62 | 0.381 | 1     | 1     | -1.17 | 0.708 | -0.81 |
| 1453408_s_at | 4930519G04Rik | RIKEN cDNA 4930519G04 gene                                                    | -1.03 | 0.897 | -1.56 | 0.322 | -1.43 | 0.24  | 1.05  | 0.882 | -0.74 |
| 1420557_at   | Epha5         | Eph receptor A5                                                               | -1.58 | 0.156 | -1.02 | 0.954 | -1.45 | 0.064 | 1.43  | 0.113 | -0.65 |
| 1431341_at   | Ppp2cb        | Protein phosphatase 2 (formerly 2A), catalytic subunit, beta isoform          | -1.29 | 0.336 | -1.99 | 0.005 | 1.03  | 0.925 | -1.14 | 0.041 | -0.85 |
| 1429426_at   | Rnf139        | ring finger protein 139                                                       | -1    | 0.994 | -1.35 | 0.298 | -1.75 | 0.015 | 1.62  | 0.375 | -0.62 |
| 1426959_at   | Bdh1          | 3-hydroxybutyrate dehydrogenase, type 1                                       | -1.17 | 0.215 | -1.99 | 0.047 | -1.05 | 0.928 | 1.58  | 0.32  | -0.66 |
| 1432475_at   | 1700014B07Rik | RIKEN cDNA 1700014B07 gene                                                    | 1.06  | 0.942 | -2.77 | 0.004 | -1.12 | 0.727 | -1.45 | 0.052 | -1.07 |
| 1446836_at   | ---           | ---                                                                           | -1.87 | 0.279 | -1.44 | 0.582 | 1.08  | 0.9   | -2.99 | 0.063 | -1.31 |
| 1440958_at   | ---           | ---                                                                           | 1.12  | 0.603 | -2.75 | 0.086 | -1.2  | 0.659 | -1.1  | 0.555 | -0.98 |
| 1458413_at   | Fbxw8         | F-box and WD-40 domain protein 8                                              | 1.04  | 0.924 | -1.5  | 0.406 | -1.66 | 0.351 | -1.15 | 0.789 | -0.82 |
| 1435612_at   | Opcml         | opioid binding protein/cell adhesion molecule-like                            | 1.17  | 0.448 | -2.25 | 0.017 | -1.44 | 0.386 | -1.23 | 0.701 | -0.94 |

|              |                      |                                                                                  |       |       |       |       |       |       |       |       |       |
|--------------|----------------------|----------------------------------------------------------------------------------|-------|-------|-------|-------|-------|-------|-------|-------|-------|
| 1418589_a_at | Mlf1                 | myeloid leukemia factor 1                                                        | -1.91 | 0.23  | -1.34 | 0.392 | 1.04  | 0.901 | -1.12 | 0.622 | -0.83 |
| 1439848_at   | Bves                 | blood vessel epicardial substance                                                | 1.16  | 0.438 | -2.09 | 0.354 | -1.49 | 0.571 | -2.81 | 0.085 | -1.31 |
| 1446760_at   | Trip13               | thyroid hormone receptor interactor 13                                           | -1.27 | 0.665 | -1.29 | 0.452 | -1.34 | 0.483 | 1.25  | 0.483 | -0.66 |
| 1442062_at   | 7120426M23Rik        | RIKEN cDNA 7120426M23 gene                                                       | -1.3  | 0.203 | -1.17 | 0.193 | -1.46 | 0.25  | 1.25  | 0.312 | -0.67 |
| 1432337_at   | Fancl                | Fanconi anemia, complementation group L                                          | -1.02 | 0.974 | -1.48 | 0.435 | -1.52 | 0.41  | 1.24  | 0.563 | -0.7  |
| 1441565_at   | ---                  | ---                                                                              | -1.41 | 0.446 | -1.91 | 0.01  | 1.08  | 0.187 | -1.17 | 0.309 | -0.85 |
| 1453187_at   | Ociad2               | OClA domain containing 2                                                         | -1.24 | 0.056 | -1.49 | 0.144 | -1.2  | 0.318 | 1.84  | 0.132 | -0.52 |
| 1435719_at   | AI448984             | expressed sequence AI448984                                                      | -1.28 | 0.011 | -1.24 | 0.233 | -1.39 | 0.099 | 1.06  | 0.834 | -0.71 |
| 1457041_at   | 1700026B20Rik        | RIKEN cDNA 1700026B20 gene                                                       | -3.34 | 0.137 | -1.09 | 0.889 | 1.1   | 0.418 | -1.99 | 0.154 | -1.33 |
| 1440035_at   | ---                  | ---                                                                              | -1.07 | 0.705 | -1.29 | 0.701 | -1.65 | 0.005 | 1.06  | 0.828 | -0.74 |
| 1439404_x_at | Zfa /// Zfx          | zinc finger protein, autosomal /// zinc finger protein X-linked                  | -1.51 | 0.076 | -1.06 | 0.833 | -1.41 | 0.2   | 1.66  | 0.081 | -0.58 |
| 1426720_at   | Apbb2                | amyloid beta (A4) precursor protein-binding, family B, member 2                  | 1.02  | 0.94  | -1.43 | 0.053 | -1.67 | 0.018 | -1.21 | 0.624 | -0.83 |
| 1432745_at   | 9430092D12Rik        | RIKEN cDNA 9430092D12 gene                                                       | -2.02 | 0.121 | 1.04  | 0.922 | -1.28 | 0.548 | -1.33 | 0.415 | -0.9  |
| 1426732_at   | Des                  | desmin                                                                           | -1.72 | 0.12  | -1.07 | 0.607 | -1.25 | 0.387 | 1.28  | 0.636 | -0.69 |
| 1418336_at   | Afg3l1               | AFG3(ATPase family gene 3)-like 1 (yeast)                                        | -1.24 | 0.504 | -2.17 | 0.056 | 1.05  | 0.813 | -1.08 | 0.572 | -0.86 |
| 1445379_at   | Atp11c               | AtPase, class VI, type 11C                                                       | -1.08 | 0.802 | -1.23 | 0.156 | -1.73 | 0.089 | 1.09  | 0.586 | -0.74 |
| 1459802_at   | ---                  | ---                                                                              | -1.73 | 0.447 | -2.39 | 0.03  | 1.32  | 0.449 | -1.2  | 0.753 | -1    |
| 1434413_at   | ---                  | ---                                                                              | -1.05 | 0.899 | -1.27 | 0.022 | -1.76 | 0.063 | 1.18  | 0.486 | -0.72 |
| 1454309_at   | 2810002N01Rik        | RIKEN cDNA 2810002N01 gene                                                       | -1.63 | 0.073 | -1.01 | 0.993 | -1.41 | 0.513 | 1.11  | 0.232 | -0.73 |
| 1431180_at   | 1700123A16Rik ///    | RIKEN cDNA 1700123A16 gene /// similar to zinc finger protein 709                | -1.3  | 0.653 | -1.6  | 0.025 | -1.09 | 0.584 | 1.11  | 0.742 | -0.72 |
| 1449691_at   | Zfp644               | Zinc finger protein 644                                                          | -1.12 | 0.801 | -1.44 | 0.182 | -1.39 | 0.287 | 1.19  | 0.417 | -0.69 |
| 1445493_at   | AU022255             | expressed sequence AU022255                                                      | -1.48 | 0.522 | 1.04  | 0.945 | -1.67 | 0.016 | -1.08 | 0.864 | -0.8  |
| 1459200_at   | ---                  | ---                                                                              | -1.29 | 0.735 | -1.09 | 0.871 | -1.61 | 0.227 | 1.37  | 0.55  | -0.66 |
| 1442365_at   | Rtn3                 | Reticulon 3                                                                      | -1.16 | 0.641 | -1.19 | 0.307 | -1.63 | 0.001 | 1.1   | 0.7   | -0.72 |
| 1427445_a_at | Ttn                  | titin                                                                            | -2.44 | 0.141 | -1.61 | 0.147 | 1.28  | 0.645 | -1.04 | 0.936 | -0.95 |
| 1446972_at   | D15Wsu126e           | DNA segment, Chr 15, Wayne State University 126, expressed                       | -1.02 | 0.898 | -1.06 | 0.758 | -2.55 | 0.007 | 1.41  | 0.208 | -0.8  |
| 1445203_at   | Pdzd2                | PDZ domain containing 2                                                          | -1.17 | 0.69  | -1.25 | 0.458 | -1.51 | 0.014 | 1.35  | 0.082 | -0.65 |
| 1445704_x_at | 2900093B09Rik        | RIKEN cDNA 2900093B09 gene                                                       | -1.18 | 0.694 | -1.16 | 0.788 | -1.65 | 0.234 | 1.19  | 0.75  | -0.7  |
| 1451939_a_at | Srpx                 | sushi-repeat-containing protein                                                  | 1.05  | 0.758 | -1.32 | 0.318 | -1.97 | 0.009 | -1.65 | 0.347 | -0.97 |
| 1445555_at   | Trpm3                | Transient receptor potential cation channel, subfamily M, member 3               | -1.1  | 0.259 | -1.34 | 0.433 | -1.5  | 0.294 | 1.81  | 0.498 | -0.53 |
| 1445624_at   | D8Ert587e            | DNA segment, Chr 8, ERATO Doi 587, expressed                                     | -1.4  | 0.094 | -1.37 | 0.07  | -1.15 | 0.134 | 2.52  | 0.096 | -0.35 |
| 1447039_at   | Ptch1                | Patched homolog 1                                                                | 1.21  | 0.491 | -1.83 | 0.212 | -1.79 | 0.098 | -1.94 | 0.155 | -1.09 |
| 1456559_at   | Emx2os               | empty spiracles homolog 2 (Drosophila) opposite strand                           | -1.09 | 0.491 | -1.46 | 0.358 | -1.39 | 0.452 | 1.5   | 0.303 | -0.61 |
| 1430241_at   | Fbxl17               | F-box and leucine-rich repeat protein 17                                         | -1.48 | 0.119 | -1.28 | 0.406 | -1.16 | 0.388 | 1.15  | 0.523 | -0.69 |
| 1438790_x_at | Tmem41b              | transmembrane protein 41B                                                        | -1.22 | 0.173 | -1.33 | 0.032 | -1.34 | 0.137 | 1.28  | 0.436 | -0.65 |
| 1430564_at   | Mobkl1a              | MOB1, Mps One Binder kinase activator-like 1A (yeast)                            | 1.08  | 0.806 | -1.68 | 0.26  | -1.57 | 0.012 | -1.05 | 0.874 | -0.8  |
| 1443295_at   | ---                  | Transcribed locus                                                                | -2.18 | 0.222 | 1.26  | 0.654 | -1.65 | 0.263 | -1.02 | 0.979 | -0.9  |
| 1441397_at   | Pard3                | Par-3 (partitioning defective 3) homolog (C. elegans)                            | -1.06 | 0.762 | -1.07 | 0.839 | -2.28 | 0.02  | 1.22  | 0.365 | -0.8  |
| 1453685_at   | Nudt7                | nudix (nucleoside diphosphate linked moiety X)-type motif 7                      | -1.04 | 0.821 | -1.7  | 0.1   | -1.3  | 0.459 | 2.07  | 0.314 | -0.49 |
| 1446755_at   | Scg5                 | Secretogranin V                                                                  | -2.71 | 0.053 | 1.05  | 0.747 | -1.12 | 0.639 | -1.18 | 0.536 | -0.99 |
| 1435844_at   | A330009N23Rik        | RIKEN cDNA A330009N23 gene                                                       | -1.55 | 0.032 | 1.02  | 0.935 | -1.54 | 0.031 | -1.22 | 0.483 | -0.82 |
| 1430851_at   | Zfp444               | zinc finger protein 444                                                          | -1.88 | 0.051 | -1.21 | 0.661 | -1.04 | 0.821 | 1     | 0.989 | -0.78 |
| 1417436_at   | Large                | like-glycosyltransferase                                                         | -1.44 | 0.695 | -2.75 | 0.203 | 1.26  | 0.637 | -2.45 | 0.221 | -1.34 |
| 1433425_at   | 1700101119Rik        | RIKEN cDNA 1700101119 gene                                                       | -1.38 | 0.007 | -1.13 | 0.603 | -1.42 | 0.008 | 1.03  | 0.855 | -0.72 |
| 1424673_at   | Clec2h               | C-type lectin domain family 2, member h                                          | -1.15 | 0.56  | -5.85 | 0.017 | 1.28  | 0.268 | -1.03 | 0.967 | -1.69 |
| 1445761_at   | D4Ert628e            | DNA segment, Chr 4, ERATO Doi 628, expressed                                     | -1.44 | 0.117 | -1.27 | 0.5   | -1.2  | 0.495 | 1.26  | 0.547 | -0.66 |
| 1419426_s_at | Ccl21b /// Ccl21a // | chemokine (C-C motif) ligand 21b /// chemokine (C-C motif) ligand 21a /// chemok | 1.26  | 0.049 | -2.81 | 0.109 | -1.43 | 0.024 | -2.83 | 0.06  | -1.45 |
| 1457328_at   | Adra2c               | adrenergic receptor, alpha 2c                                                    | -1.48 | 0.294 | -1.1  | 0.837 | -1.36 | 0.572 | 1.11  | 0.895 | -0.71 |
| 1436655_at   | 1300002A08Rik        | RIKEN cDNA 1300002A08 gene                                                       | -1.17 | 0.712 | -1.45 | 0.201 | -1.29 | 0.552 | 1.01  | 0.931 | -0.72 |
| 1454368_at   | Psmad7               | proteasome (prosome, macropain) 26S subunit, non-ATPase, 7                       | -2.52 | 0.144 | 1.18  | 0.714 | -1.34 | 0.643 | -1.19 | 0.598 | -0.97 |
| 1430918_at   | 3-Mar                | membrane-associated ring finger (C3HC4) 3                                        | -1.28 | 0.37  | -1.21 | 0.707 | -1.4  | 0.294 | 3.49  | 0.256 | -0.1  |
| 1425342_a_at | Kcnk3                | potassium channel, subfamily K, member 3                                         | -1.36 | 0.4   | -1.22 | 0.331 | -1.3  | 0.39  | 1.17  | 0.536 | -0.68 |
| 1443097_at   | Nf1                  | Neurofibromatosis 1                                                              | 1.06  | 0.869 | -1.78 | 0.06  | -1.43 | 0.099 | -1.71 | 0.304 | -0.96 |

|              |               |                                                                                |       |       |       |       |       |       |       |       |       |
|--------------|---------------|--------------------------------------------------------------------------------|-------|-------|-------|-------|-------|-------|-------|-------|-------|
| 1430119_at   | Fndc1         | fibronectin type III domain containing 1                                       | -1.23 | 0.394 | -1.91 | 0.218 | -1.02 | 0.949 | 1.33  | 0.214 | -0.71 |
| 1460157_at   | ---           | ---                                                                            | -3.44 | 0.091 | 1.32  | 0.333 | -1.41 | 0.535 | -1.07 | 0.752 | -1.15 |
| 1442878_at   | Prdx6         | peroxiredoxin 6                                                                | -1.02 | 0.868 | -1.32 | 0.467 | -1.71 | 0.077 | 1.2   | 0.585 | -0.71 |
| 1432904_at   | 3110037C07Rik | RIKEN cDNA 3110037C07 gene                                                     | 1.18  | 0.458 | -1.33 | 0.357 | -2.57 | 0.086 | -1.71 | 0.416 | -1.11 |
| 1441891_x_at | Elov17        | ELOVL family member 7, elongation of long chain fatty acids (yeast)            | -1.14 | 0.226 | -2.09 | 0.093 | -1.04 | 0.859 | 1.91  | 0.201 | -0.59 |
| 1450492_at   | Cngb3         | cyclic nucleotide gated channel beta 3                                         | -1.09 | 0.755 | -1.65 | 0.218 | -1.25 | 0.569 | 1.09  | 0.832 | -0.73 |
| 1431723_at   | 1600022D10Rik | RIKEN cDNA 1600022D10 gene                                                     | -1.84 | 0.418 | -1.08 | 0.898 | -1.18 | 0.709 | 1.03  | 0.949 | -0.77 |
| 1445588_at   | Ankrd44       | ankyrin repeat domain 44                                                       | -1.3  | 0.405 | 1.03  | 0.958 | -1.9  | 0.019 | -2.23 | 0.16  | -1.1  |
| 1445927_at   | D13Ert212e    | DNA segment, Chr 13, ERATO Doi 212, expressed                                  | -1.48 | 0.433 | -1.04 | 0.966 | -1.47 | 0.257 | 1.23  | 0.728 | -0.69 |
| 1429378_x_at | AY761184      | cDNA sequence AY761184                                                         | -1.6  | 0.153 | -1.15 | 0.558 | -1.21 | 0.429 | 1.21  | 0.673 | -0.69 |
| 1421335_a_at | Egfl7         | EGF-like domain 7                                                              | -1.34 | 0.154 | -1.13 | 0.499 | -1.45 | 0.119 | 1.05  | 0.773 | -0.72 |
| 1433311_at   | D530031A16Rik | RIKEN cDNA D530031A16 gene                                                     | -1.65 | 0.438 | -1.27 | 0.448 | -1.08 | 0.853 | 1.21  | 0.743 | -0.7  |
| 1436491_at   | 5830431A10Rik | RIKEN cDNA 5830431A10 gene                                                     | -1.39 | 0.664 | -1.8  | 0.422 | 1.04  | 0.6   | -4.39 | 0.032 | -1.63 |
| 1420578_at   | Optc          | opticin                                                                        | 1     | 1     | -1.7  | 0.411 | -1.37 | 0.47  | -2.11 | 0.095 | -1.04 |
| 1434527_at   | Nalp4b        | NACHT, leucine rich repeat and PYD containing 4B                               | 1.02  | 0.955 | -1.06 | 0.935 | -2.81 | 0.077 | -1.54 | 0.379 | -1.1  |
| 1435607_at   | Grm2          | G protein-coupled receptor, family C, group 1, member B                        | -1.39 | 0.2   | -1.83 | 0.407 | 1.06  | 0.934 | -1.01 | 0.958 | -0.8  |
| 1458376_at   | B930025B16Rik | RIKEN cDNA B930025B16 gene                                                     | -1.42 | 0.081 | 1.18  | 0.138 | -2.29 | 0.003 | -1.51 | 0.297 | -1.01 |
| 1443406_at   | Plscr4        | phospholipid scramblase 4                                                      | -1.22 | 0.084 | -1.26 | 0.449 | -1.42 | 0.237 | 1.1   | 0.855 | -0.7  |
| 1442879_at   | ---           | ---                                                                            | -1.35 | 0.39  | -1.65 | 0.487 | -1.02 | 0.926 | 1.11  | 0.757 | -0.73 |
| 1427772_at   | Defb15        | defensin beta 15                                                               | -2.38 | 0.166 | -1.5  | 0.382 | 1.23  | 0.742 | -2.38 | 0.547 | -1.26 |
| 1447263_at   | Metap2        | Methionine aminopeptidase 2                                                    | -1.02 | 0.917 | -1.56 | 0.039 | -1.42 | 0.167 | 2.56  | 0.201 | -0.36 |
| 1450296_at   | Klrb1a        | killer cell lectin-like receptor subfamily B member 1A                         | -2.53 | 0.306 | 1.39  | 0.674 | -1.85 | 0.244 | -1.64 | 0.162 | -1.16 |
| 1419953_at   | C80678        | expressed sequence C80678                                                      | 1.15  | 0.058 | -1.23 | 0.575 | -2.74 | 0.1   | -1.75 | 0.579 | -1.14 |
| 1425642_at   | Cep290        | centrosomal protein 290                                                        | -1.55 | 0.442 | -1.19 | 0.197 | -1.19 | 0.499 | 2.26  | 0.082 | -0.42 |
| 1456793_at   | Cyt1          | cytokine like 1                                                                | 1.1   | 0.784 | -1.57 | 0.184 | -1.72 | 0.251 | -1.25 | 0.571 | -0.86 |
| 1460604_at   | Cybrd1        | cytochrome b reductase 1                                                       | 1.02  | 0.951 | -1.25 | 0.769 | -2    | 0.054 | -2.07 | 0.151 | -1.07 |
| 1458862_at   | C78704        | expressed sequence C78704                                                      | -1.27 | 0.445 | -1.32 | 0.555 | -1.29 | 0.555 | 1.29  | 0.197 | -0.65 |
| 1422585_at   | Odf1          | outer dense fiber of sperm tails 1                                             | -1.76 | 0.466 | 1.14  | 0.729 | -1.62 | 0.383 | -1.07 | 0.704 | -0.83 |
| 1445446_at   | ---           | Transcribed locus                                                              | -1.98 | 0.08  | -1.07 | 0.863 | -1.14 | 0.54  | 1.05  | 0.777 | -0.78 |
| 1459027_at   | ---           | Transcribed locus                                                              | -2.08 | 0.071 | -1.79 | 0.321 | 1.28  | 0.492 | -1.2  | 0.786 | -0.95 |
| 1431389_at   | Tbkbp1        | TBK1 binding protein 1                                                         | -1.23 | 0.768 | -1.36 | 0.509 | -1.3  | 0.126 | 1.02  | 0.939 | -0.71 |
| 1458663_at   | Large         | Like-glycosyltransferase                                                       | -1.16 | 0.27  | 1.03  | 0.939 | -2.31 | 0.009 | -1.18 | 0.541 | -0.91 |
| 1430763_at   | 4930563E22Rik | RIKEN cDNA 4930563E22 gene                                                     | -1.78 | 0.035 | -1.3  | 0.066 | -1.01 | 0.972 | 1.1   | 0.388 | -0.75 |
| 1428778_at   | Sfi1          | Sfi1 homolog, spindle assembly associated (yeast)                              | -1.39 | 0.234 | -1.49 | 0.16  | -1.07 | 0.769 | 1.22  | 0.502 | -0.68 |
| 1425301_at   | Ncam2         | neural cell adhesion molecule 2                                                | -1.28 | 0.664 | -1.39 | 0.478 | -1.21 | 0.627 | 1.92  | 0.187 | -0.49 |
| 1449903_at   | Crtam         | cytotoxic and regulatory T cell molecule                                       | 1.14  | 0.652 | -1.77 | 0.244 | -1.62 | 0.274 | -1.27 | 0.62  | -0.88 |
| 1450909_at   | Eif4e         | eukaryotic translation initiation factor 4E                                    | -1.55 | 0.014 | -1.18 | 0.309 | -1.21 | 0.422 | 1.39  | 0.154 | -0.64 |
| 1445282_at   | Mkln1         | Muskelin 1, intracellular mediator containing kelch motifs                     | -1.3  | 0.062 | -1.02 | 0.8   | -1.74 | 0.034 | 1.07  | 0.757 | -0.75 |
| 1448365_at   | Exosc7        | exosome component 7                                                            | -1.4  | 0.143 | -1.28 | 0.024 | -1.21 | 0.04  | 1.21  | 0.541 | -0.67 |
| 1440465_at   | Cutl1         | Cut-like 1 (Drosophila)                                                        | -1.42 | 0.018 | -1.17 | 0.442 | -1.31 | 0.241 | 1.05  | 0.845 | -0.71 |
| 1444749_at   | Apod          | Apolipoprotein D                                                               | -1.68 | 0.466 | -1.84 | 0.486 | 1.19  | 0.639 | -1.31 | 0.518 | -0.91 |
| 1439286_at   | Grik2         | Glutamate receptor, ionotropic, kainate 2 (beta 2)                             | -1.51 | 0.531 | -1.08 | 0.911 | -1.36 | 0.414 | 1.16  | 0.734 | -0.7  |
| 1430304_at   | Wdr76         | WD repeat domain 76                                                            | -1.36 | 0.126 | -1.86 | 0.12  | 1.05  | 0.889 | -1.04 | 0.829 | -0.8  |
| 1418212_at   | Omg           | oligodendrocyte myelin glycoprotein                                            | -1.55 | 0.011 | 1.08  | 0.684 | -1.67 | 0.389 | -2.16 | 0.179 | -1.07 |
| 1442986_at   | Elk3          | ELK3, member of ETS oncogene family                                            | 1.25  | 0.687 | -2.27 | 0.212 | -1.59 | 0.086 | -1.67 | 0.185 | -1.07 |
| 1442551_at   | ---           | ---                                                                            | -1.77 | 0.171 | -1.37 | 0.548 | 1.03  | 0.936 | -1.08 | 0.856 | -0.8  |
| 1417565_at   | Abhd5         | abhydrolase domain containing 5                                                | -1.24 | 0.377 | -1.28 | 0.012 | -1.35 | 0.054 | 1.96  | 0.325 | -0.48 |
| 1453834_at   | 1500002C15Rik | RIKEN cDNA 1500002C15 gene                                                     | 1.19  | 0.838 | -1.4  | 0.416 | -2.36 | 0.051 | -1.44 | 0.581 | -1    |
| 1439366_at   | Grsf1         | G-rich RNA sequence binding factor 1                                           | -3.33 | 0.386 | 1.19  | 0.413 | -1.2  | 0.641 | -1.38 | 0.416 | -1.18 |
| 1447256_at   | ---           | 17 days embryo kidney cDNA, RIKEN full-length enriched library, clone:1920178F | -1.15 | 0.755 | -1.32 | 0.569 | -1.43 | 0.452 | 1.19  | 0.788 | -0.68 |
| 1433316_at   | 4930477O15Rik | RIKEN cDNA 4930477O15 gene                                                     | -2.47 | 0.483 | -1.28 | 0.604 | 1.14  | 0.779 | -2.18 | 0.368 | -1.2  |
| 1454141_at   | 5730416O20Rik | RIKEN cDNA 5730416O20 gene                                                     | -1.6  | 0.173 | 1.23  | 0.244 | -2.13 | 0.05  | -1.27 | 0.68  | -0.94 |
| 1444657_at   | B3bp          | Bcl3 binding protein                                                           | -1.42 | 0.531 | -1.47 | 0.347 | -1.07 | 0.86  | 1.24  | 0.475 | -0.68 |

|              |                    |                                                                                  |       |       |       |       |       |       |       |       |       |
|--------------|--------------------|----------------------------------------------------------------------------------|-------|-------|-------|-------|-------|-------|-------|-------|-------|
| 1432056_at   | Cpvl               | carboxypeptidase, vitellogenic-like                                              | -1.59 | 0.491 | -1.09 | 0.727 | -1.29 | 0.277 | 1.01  | 0.99  | -0.74 |
| 1450619_x_at | Cmar               | cell matrix adhesion regulator                                                   | -1.21 | 0.619 | -1.71 | 0.039 | -1.09 | 0.488 | 1.24  | 0.486 | -0.69 |
| 1439897_at   | Neb1               | Nebulette                                                                        | -4.53 | 0.065 | -1.1  | 0.876 | 1.2   | 0.31  | -1.81 | 0.092 | -1.56 |
| 1457262_at   | 2610207I05Rik      | RIKEN cDNA 2610207I05 gene                                                       | 1.21  | 0.122 | -1.92 | 0.353 | -1.68 | 0.117 | -2.28 | 0.108 | -1.17 |
| 1454511_at   | 9430018C23Rik      | RIKEN cDNA 9430018C23 gene                                                       | -1.15 | 0.855 | 1.05  | 0.919 | -2.48 | 0.2   | -1.18 | 0.747 | -0.94 |
| 1431219_at   | B3gat3             | beta-1,3-glucuronyltransferase 3 (glucuronosyltransferase I)                     | 1.12  | 0.746 | -1.7  | 0.435 | -1.61 | 0.123 | -1.46 | 0.246 | -0.92 |
| 1445797_at   | Pam                | Peptidylglycine alpha-amidating monooxygenase                                    | -2.15 | 0.058 | -1.18 | 0.744 | 1.01  | 0.977 | -1.06 | 0.871 | -0.84 |
| 1431662_at   | 4930555F03Rik      | RIKEN cDNA 4930555F03 gene                                                       | 1.07  | 0.921 | -2.06 | 0.267 | -1.3  | 0.637 | -1.19 | 0.756 | -0.87 |
| 1456317_at   | Aldh3b2            | aldehyde dehydrogenase 3 family, member B2                                       | -1.27 | 0.088 | -1.21 | 0.648 | -1.4  | 0.096 | 1.9   | 0.045 | -0.5  |
| 1448855_at   | Rassf1             | Ras association (RalGDS/AF-6) domain family 1                                    | -1.43 | 0.018 | -1.43 | 0.304 | -1.08 | 0.751 | 1.17  | 0.501 | -0.69 |
| 1440056_at   | ---                | Adult male hippocampus cDNA, RIKEN full-length enriched library, clone:C63000    | -1.04 | 0.755 | -2.86 | 0.023 | 1.01  | 0.968 | -1.58 | 0.396 | -1.12 |
| 1449279_at   | Gpx2               | glutathione peroxidase 2                                                         | -1.2  | 0.739 | -1.57 | 0.204 | -1.17 | 0.547 | 1.08  | 0.902 | -0.71 |
| 1420718_at   | Odz2 /// LOC66949  | odd Oz/ten-m homolog 2 (Drosophila) /// similar to odd Oz/ten-m homolog 2        | -1.67 | 0.111 | -1.17 | 0.823 | -1.14 | 0.738 | 1.22  | 0.607 | -0.69 |
| 1439281_at   | ---                | PREDICTED: Mus musculus similar to solute carrier family 26, member 8 isoform    | -1.18 | 0.582 | -1.11 | 0.858 | -1.72 | 0.125 | 1.12  | 0.854 | -0.72 |
| 1435685_x_at | Abcc5              | ATP-binding cassette, sub-family C (CFTR/MRP), member 5                          | -1.37 | 0.083 | -1.3  | 0.237 | -1.21 | 0.614 | 1.27  | 0.341 | -0.65 |
| 1456213_x_at | Qars               | glutamyl-tRNA synthetase                                                         | -1.46 | 0.278 | -1.12 | 0.202 | -1.34 | 0.325 | 1.02  | 0.787 | -0.73 |
| 1430207_at   | 4933437N03Rik      | RIKEN cDNA 4933437N03 gene                                                       | -1.51 | 0.354 | -1.02 | 0.955 | -1.46 | 0.583 | 1.26  | 0.584 | -0.68 |
| 1450389_s_at | Pip5k1a            | phosphatidylinositol-4-phosphate 5-kinase, type 1 alpha                          | -1.56 | 0.314 | -1.33 | 0.171 | -1.07 | 0.558 | 6.86  | 0.225 | 0.72  |
| 1424217_at   | Papola             | poly (A) polymerase alpha                                                        | -1.21 | 0.101 | -1.24 | 0.325 | -1.45 | 0.164 | 1.23  | 0.111 | -0.67 |
| 1443297_at   | Tbc1d12            | TBC1D12: TBC1 domain family, member 12                                           | -1.07 | 0.898 | -1.36 | 0.509 | -1.52 | 0.342 | 2.84  | 0.09  | -0.28 |
| 1443121_at   | ---                | ---                                                                              | 1.03  | 0.9   | -1.96 | 0.003 | -1.28 | 0.406 | -1.14 | 0.25  | -0.84 |
| 1459390_at   | ---                | Transcribed locus                                                                | -2.01 | 0.195 | -1.36 | 0.197 | 1.09  | 0.798 | -1.67 | 0.123 | -0.99 |
| 1448738_at   | Calb1              | calbindin-28K                                                                    | -1.38 | 0.024 | 1.1   | 0.715 | -1.99 | 0.032 | -1.34 | 0.269 | -0.9  |
| 1429822_at   | 4633401B06Rik      | RIKEN cDNA 4633401B06 gene                                                       | 1.1   | 0.653 | -1.42 | 0.251 | -1.92 | 0.004 | -1.16 | 0.609 | -0.85 |
| 1446431_at   | Dnm3               | Dynamin 3                                                                        | -1.33 | 0.098 | -1.45 | 0.335 | -1.13 | 0.519 | 1.27  | 0.264 | -0.66 |
| 1428160_at   | Ndufab1            | NADH dehydrogenase (ubiquinone) 1, alpha/beta subcomplex, 1                      | -1.19 | 0.272 | -1.48 | 0.166 | -1.23 | 0.155 | 1.08  | 0.732 | -0.7  |
| 1444461_at   | Zmynd11            | Zinc finger, MYND domain containing 11                                           | 1.16  | 0.786 | -1.55 | 0.148 | -1.9  | 0.037 | -3.08 | 0.034 | -1.34 |
| 1417888_at   | Trim13             | tripartite motif protein 13                                                      | -1.11 | 0.548 | -1.44 | 0.431 | -1.36 | 0.189 | 1.29  | 0.252 | -0.66 |
| 1443636_at   | Abcb9              | ATP-binding cassette, sub-family B (MDR/TAP), member 9                           | -1.45 | 0.348 | -1.34 | 0.106 | -1.12 | 0.64  | 1.13  | 0.457 | -0.7  |
| 1431995_at   | Antxr1             | anthrax toxin receptor 1                                                         | -1.11 | 0.697 | -1.17 | 0.797 | -1.74 | 0.019 | 1.25  | 0.168 | -0.69 |
| 1431677_at   | 4631424J17Rik      | RIKEN cDNA 4631424J17 gene                                                       | 1.04  | 0.828 | -1.43 | 0.084 | -1.69 | 0.213 | -1    | 0.986 | -0.77 |
| 1452794_x_at | Speer1-ps1 /// LOC | spermatogenesis associated glutamate (E)-rich protein 1, pseudogene 1 /// simila | -2.08 | 0.329 | -1.34 | 0.256 | 1.1   | 0.544 | -1.35 | 0.638 | -0.92 |
| 1460080_at   | Al645535           | expressed sequence Al645535                                                      | -1.53 | 0.186 | -1.28 | 0.171 | -1.12 | 0.417 | 1.16  | 0.663 | -0.69 |
| 1451909_a_at | Prpf4b             | PRP4 pre-mRNA processing factor 4 homolog B (yeast)                              | -1.33 | 0.026 | -1.24 | 0.087 | -1.29 | 0.286 | 1.13  | 0.157 | -0.68 |
| 1441404_at   | Pafah1b1           | Platelet-activating factor acetylhydrolase, isoform 1b, beta1 subunit            | -1.22 | 0.167 | -1.36 | 0.263 | -1.29 | 0.514 | 1.1   | 0.567 | -0.69 |
| 1435986_x_at | Sdhc               | succinate dehydrogenase complex, subunit C, integral membrane protein            | -1.28 | 0.362 | -1.26 | 0.223 | -1.33 | 0.086 | 1.11  | 0.642 | -0.69 |
| 1426026_at   | Prpf6              | PRP6 pre-mRNA splicing factor 6 homolog (yeast)                                  | -1.37 | 0.06  | -2.15 | 0.267 | 1.13  | 0.761 | -1.03 | 0.949 | -0.85 |
| 1421279_at   | Lamc2              | laminin, gamma 2                                                                 | -1.18 | 0.246 | 1.09  | 0.798 | -2.58 | 0.135 | -3.45 | 0.047 | -1.53 |
| 1441791_at   | Oprm1              | Opioid receptor, mu 1                                                            | -1.31 | 0.298 | -1.42 | 0.06  | -1.15 | 0.487 | 1.53  | 0.369 | -0.59 |
| 1442279_at   | Epc1               | Enhancer of polycomb homolog 1 (Drosophila)                                      | -1.13 | 0.725 | 1.02  | 0.745 | -2.35 | 0.033 | -1    | 0.983 | -0.87 |
| 1456446_at   | 4930523C07Rik      | RIKEN cDNA 4930523C07 gene                                                       | 1.08  | 0.774 | -1.37 | 0.398 | -1.95 | 0.011 | -1.95 | 0.026 | -1.04 |
| 1441406_at   | ---                | ---                                                                              | -1.29 | 0.805 | -2.22 | 0.253 | 1.11  | 0.81  | -1.48 | 0.55  | -0.97 |
| 1434422_at   | ---                | ---                                                                              | -1.12 | 0.515 | -1.36 | 0.026 | -1.42 | 0.133 | 1     | 0.996 | -0.73 |
| 1458390_at   | Anapc10            | anaphase promoting complex subunit 10                                            | -1.41 | 0.147 | -1.52 | 0.519 | -1.04 | 0.842 | 1.32  | 0.077 | -0.66 |
| 1419877_x_at | ---                | Transcribed locus                                                                | -1.93 | 0.476 | 1.12  | 0.731 | -1.46 | 0.279 | -1.44 | 0.298 | -0.92 |
| 1432932_at   | ---                | ---                                                                              | -2.66 | 0.238 | 1.03  | 0.952 | -1.08 | 0.861 | -3    | 0.044 | -1.43 |
| 1455477_s_at | Pdzk1ip1           | PDZK1 interacting protein 1                                                      | -1.13 | 0.065 | -1.46 | 0.085 | -1.31 | 0.238 | 4.23  | 0.168 | 0.08  |
| 1423465_at   | Frrs1 /// LOC63599 | ferric-chelate reductase 1 /// similar to stromal cell derived factor receptor 2 | -1.21 | 0.146 | -1.22 | 0.183 | -1.47 | 0.057 | 1.59  | 0.2   | -0.58 |
| 1430369_at   | Epb4.1             | erythrocyte protein band 4.1                                                     | -1.15 | 0.779 | -1.76 | 0.115 | -1.12 | 0.735 | 2.98  | 0.245 | -0.26 |
| 1433760_a_at | Rhbdd3             | rhomboid domain containing 3                                                     | -1.03 | 0.798 | -1.02 | 0.952 | -2.68 | 0.009 | 1.7   | 0.242 | -0.76 |
| 1441802_at   | Spred2             | sprouty-related, EVH1 domain containing 2                                        | 1.21  | 0.357 | -1.29 | 0.273 | -2.92 | 0.038 | -3.43 | 0.037 | -1.61 |
| 1454440_at   | 4930421C12Rik      | RIKEN cDNA 4930421C12 gene                                                       | 1.3   | 0.525 | -2    | 0.247 | -1.87 | 0.141 | -2.36 | 0.045 | -1.23 |
| 1448261_at   | Cdh1               | cadherin 1                                                                       | -1.04 | 0.738 | -3.8  | 0.02  | 1.11  | 0.249 | -1.38 | 0.041 | -1.28 |

|              |                  |                                                                                  |       |       |       |       |       |       |       |       |       |
|--------------|------------------|----------------------------------------------------------------------------------|-------|-------|-------|-------|-------|-------|-------|-------|-------|
| 1441437_at   | Rbms1            | RNA binding motif, single stranded interacting protein 1                         | 1.08  | 0.613 | -1.12 | 0.662 | -2.77 | 0.013 | -1.75 | 0.012 | -1.14 |
| 1416325_at   | Crisp1           | cysteine-rich secretory protein 1                                                | -1.23 | 0.58  | -1.35 | 0.577 | -1.29 | 0.663 | 1.12  | 0.805 | -0.69 |
| 1444180_at   | ---              | 12 days embryo spinal ganglion cDNA, RIKEN full-length enriched library, clone:1 | 1.02  | 0.954 | -1.32 | 0.095 | -1.79 | 0.009 | -1.7  | 0.103 | -0.95 |
| 1439923_at   | Tubgcp5          | tubulin, gamma complex associated protein 5                                      | 1.49  | 0.571 | -2.61 | 0.198 | -2.18 | 0.101 | -1.07 | 0.904 | -1.09 |
| 1430795_at   | 5830407F19Rik    | RIKEN cDNA 5830407F19 gene                                                       | -1.3  | 0.06  | -1.52 | 0.287 | -1.11 | 0.637 | 1.22  | 0.26  | -0.68 |
| 1444604_at   | Ezh1             | Enhancer of zeste homolog 1 (Drosophila)                                         | -1.31 | 0.516 | -1.45 | 0.046 | -1.14 | 0.441 | 1.99  | 0.055 | -0.48 |
| 1444301_at   | Pcdh10           | protocadherin 10                                                                 | -1.96 | 0.135 | -1.9  | 0.502 | 1.29  | 0.563 | -1.62 | 0.435 | -1.05 |
| 1444311_at   | ---              | ---                                                                              | -1.96 | 0.134 | -1.5  | 0.504 | 1.16  | 0.468 | -1.08 | 0.809 | -0.85 |
| 1443561_at   | Mrg1             | Myeloid ecotropic viral integration site-related gene 1                          | -1.6  | 0.344 | 1.06  | 0.922 | -1.56 | 0.169 | -3.48 | 0.042 | -1.39 |
| 1438763_at   | Dnahc2 /// Dnhd3 | dynein, axonemal, heavy chain 2 /// dynein heavy chain domain 3                  | -1.55 | 0.354 | -1.72 | 0.112 | 1.11  | 0.547 | -1.04 | 0.93  | -0.8  |
| 1447020_at   | Zfpm2            | Zinc finger protein, multitype 2                                                 | -1.7  | 0.135 | 1.17  | 0.629 | -1.75 | 0.025 | -1.13 | 0.826 | -0.85 |
| 1440444_at   | Fads1            | fatty acid desaturase 1                                                          | -1.36 | 0.348 | -1.44 | 0.408 | -1.11 | 0.555 | 2.41  | 0.234 | -0.37 |
| 1423576_a_at | Fhl4             | four and a half LIM domains 4                                                    | -1.11 | 0.85  | -1.04 | 0.963 | -2.14 | 0.387 | 1.1   | 0.794 | -0.8  |
| 1452567_at   | Gcap8            | granule cell antiserum positive 8                                                | -3.11 | 0.054 | -1.01 | 0.975 | 1.02  | 0.964 | -1.13 | 0.55  | -1.06 |
| 1442059_at   | Fxr1h            | fragile X mental retardation gene 1, autosomal homolog                           | -1.45 | 0.485 | -1.05 | 0.818 | -1.44 | 0.08  | 1.13  | 0.561 | -0.7  |
| 1458213_at   | Nfat5            | Nuclear factor of activated T-cells 5                                            | 1.09  | 0.789 | -1.73 | 0.087 | -1.5  | 0.124 | -1.56 | 0.117 | -0.93 |
| 1443642_at   | Taok2            | TAO kinase 2                                                                     | -2.04 | 0.253 | -1.05 | 0.899 | -1.12 | 0.719 | 3.7   | 0.078 | -0.13 |
| 1444077_at   | ---              | Transcribed locus                                                                | -1.32 | 0.286 | 1.14  | 0.811 | -2.28 | 0.31  | -1.02 | 0.947 | -0.87 |
| 1458926_at   | 5830415L20Rik    | RIKEN cDNA 5830415L20 gene                                                       | -1.03 | 0.939 | -1.83 | 0.184 | -1.22 | 0.165 | 1.77  | 0.052 | -0.58 |
| 1445494_at   | Aaas             | Achalasia, adrenocortical insufficiency, alacrimia                               | -2.01 | 0.46  | 1.13  | 0.591 | -1.41 | 0.353 | -1.75 | 0.439 | -1.01 |
| 1445536_at   | AW061096         | expressed sequence AW061096                                                      | -1.6  | 0.231 | -1.08 | 0.763 | -1.28 | 0.459 | 1.36  | 0.499 | -0.65 |
| 1453028_at   | 4631424J17Rik    | RIKEN cDNA 4631424J17 gene                                                       | -1.2  | 0.07  | -1.24 | 0.339 | -1.44 | 0.139 | 1.06  | 0.827 | -0.71 |
| 1459543_at   | AA407787         | expressed sequence AA407787                                                      | -1.32 | 0.652 | -1.31 | 0.702 | -1.23 | 0.624 | 1.78  | 0.251 | -0.52 |
| 1458409_at   | C86595           | expressed sequence C86595                                                        | -1.8  | 0.212 | 1.4   | 0.538 | -2.65 | 0.073 | -1.01 | 0.973 | -1.01 |
| 1446185_at   | Frap1            | FK506 binding protein 12-rapamycin associated protein 1                          | -1.28 | 0.497 | -1.33 | 0.599 | -1.24 | 0.454 | 1.22  | 0.724 | -0.66 |
| 1446109_at   | Wdty3            | WD repeat and FYVE domain containing 3                                           | 1.48  | 0.003 | -2.81 | 0.247 | -1.99 | 0.267 | -1.27 | 0.69  | -1.15 |
| 1447631_at   | Myst2            | MYST histone acetyltransferase 2                                                 | -1.13 | 0.287 | -1.33 | 0.295 | -1.44 | 0.102 | 1.26  | 0.2   | -0.66 |
| 1421362_a_at | Frk              | fyn-related kinase                                                               | -1.12 | 0.406 | -1.85 | 0.276 | -1.11 | 0.758 | 1.83  | 0.353 | -0.56 |
| 1434724_at   | Usp31            | ubiquitin specific peptidase 31                                                  | -1.12 | 0.417 | -1.46 | 0.001 | -1.32 | 0.404 | 1.29  | 0.454 | -0.65 |
| 1460389_at   | Cdk8             | cyclin-dependent kinase 8                                                        | -1.11 | 0.714 | -1.3  | 0.051 | -1.51 | 0.081 | 1.04  | 0.811 | -0.72 |
| 1432114_at   | 1110035E04Rik    | RIKEN cDNA 1110035E04 gene                                                       | -1.19 | 0.607 | -1.52 | 0.312 | -1.19 | 0.433 | 1.08  | 0.752 | -0.71 |
| 1458822_at   | ---              | ---                                                                              | 1.23  | 0.83  | -1.31 | 0.409 | -2.91 | 0.058 | -1.58 | 0.481 | -1.14 |
| 1453809_at   | Lypd5            | Ly6/Plaur domain containing 5                                                    | -3.22 | 0.005 | -1.44 | 0.494 | 1.33  | 0.382 | -1.53 | 0.014 | -1.22 |
| 1445092_at   | ---              | ---                                                                              | -1.25 | 0.433 | -1.51 | 0.405 | -1.14 | 0.591 | 1.11  | 0.792 | -0.7  |
| 1439926_at   | 4632417D23Rik    | RIKEN cDNA 4632417D23 gene                                                       | -1.54 | 0.312 | 1.13  | 0.759 | -1.81 | 0.153 | -1.67 | 0.225 | -0.97 |
| 1445606_a_at | 2900009J06Rik    | RIKEN cDNA 2900009J06 gene                                                       | -1.15 | 0.781 | -1.47 | 0.308 | -1.27 | 0.333 | 1.53  | 0.323 | -0.59 |
| 1432512_at   | 4931433A01Rik    | RIKEN cDNA 4931433A01 gene                                                       | -1.83 | 0.412 | -1.08 | 0.851 | -1.16 | 0.628 | 1.34  | 0.293 | -0.68 |
| 1448209_a_at | Slc22a17         | solute carrier family 22 (organic cation transporter), member 17                 | -1.25 | 0.479 | -1.62 | 0.014 | -1.09 | 0.169 | 1.02  | 0.957 | -0.74 |
| 1449073_at   | Finc             | filamin C, gamma (actin binding protein 280)                                     | 1.03  | 0.952 | -2.02 | 0.073 | -1.23 | 0.549 | -1.61 | 0.527 | -0.96 |
| 1424214_at   | 9130213B05Rik    | RIKEN cDNA 9130213B05 gene                                                       | -1.74 | 0.103 | -1.31 | 0.268 | 1     | 0.985 | -1.95 | 0.244 | -1    |
| 1418669_at   | Hspg2            | perlecan (heparan sulfate proteoglycan 2)                                        | -1.38 | 0.193 | -1.45 | 0.222 | -1.09 | 0.653 | 1.19  | 0.48  | -0.68 |
| 1447308_at   | Lass5            | longevity assurance homolog 5 (S. cerevisiae)                                    | -1.02 | 0.957 | -1.78 | 0.276 | -1.26 | 0.013 | 1.08  | 0.724 | -0.75 |
| 1438039_at   | Hectd1           | HECT domain containing 1                                                         | -1.16 | 0.624 | -1.45 | 0.023 | -1.27 | 0.115 | 1.2   | 0.438 | -0.67 |
| 1444651_at   | LOC553089        | hypothetical LOC553089                                                           | 1.04  | 0.882 | -1.2  | 0.434 | -2.14 | 0.015 | -1.11 | 0.736 | -0.85 |
| 1452597_at   | 2310061C15Rik    | RIKEN cDNA 2310061C15 gene                                                       | -1.17 | 0.086 | -1.22 | 0.242 | -1.52 | 0.002 | 2.03  | 0.177 | -0.47 |
| 1450346_at   | Gpr50            | G-protein-coupled receptor 50                                                    | -1.29 | 0.174 | -1.23 | 0.456 | -1.35 | 0.364 | 1.11  | 0.657 | -0.69 |
| 1446689_at   | D230007K08Rik    | RIKEN cDNA D230007K08 gene                                                       | -2.06 | 0.082 | 1.02  | 0.935 | -1.2  | 0.453 | -1.37 | 0.563 | -0.9  |
| 1453332_at   | 2410002O22Rik    | RIKEN cDNA 2410002O22 gene                                                       | -1.26 | 0.256 | -1.72 | 0.016 | -1.04 | 0.868 | 1.22  | 0.548 | -0.7  |
| 1430081_at   | Phf15            | PHD finger protein 15                                                            | 1.01  | 0.956 | -1.28 | 0.55  | -1.83 | 0.029 | -1.84 | 0.012 | -0.99 |
| 1419887_at   | Nudcd1           | NudC domain containing 1                                                         | -1.93 | 0.228 | -1.39 | 0.478 | 1.1   | 0.827 | -1.09 | 0.841 | -0.83 |
| 1452723_at   | Klf9             | Kruppel-like factor 9                                                            | -1.07 | 0.673 | -1.65 | 0.134 | -1.25 | 0.547 | 1.14  | 0.782 | -0.71 |
| 1421678_at   | Itpr2            | inositol 1,4,5-triphosphate receptor 2                                           | -1.37 | 0.592 | -1.8  | 0.005 | 1.05  | 0.866 | -1.55 | 0.107 | -0.92 |
| 1459220_at   | C78651           | expressed sequence C78651                                                        | -1.08 | 0.853 | -1.71 | 0.106 | -1.21 | 0.541 | 1.43  | 0.443 | -0.64 |

|              |                   |                                                                                 |       |       |       |       |       |       |       |       |       |
|--------------|-------------------|---------------------------------------------------------------------------------|-------|-------|-------|-------|-------|-------|-------|-------|-------|
| 1456756_at   | E430016P22Rik     | RIKEN cDNA E430016P22 gene                                                      | -1.16 | 0.513 | -1.83 | 0.256 | -1.08 | 0.803 | 1.03  | 0.94  | -0.76 |
| 1441153_at   | Utrn              | Utrophin                                                                        | 1.12  | 0.353 | -1.41 | 0.014 | -1.98 | 0.013 | -1.66 | 0.304 | -0.98 |
| 1446829_at   | D12Ert216e        | DNA segment, Chr 12, ERATO Doi 216, expressed                                   | -1.14 | 0.74  | -2.77 | 0.314 | 1.1   | 0.886 | -1.87 | 0.338 | -1.17 |
| 1454537_at   | 4930556A12Rik     | RIKEN cDNA 4930556A12 gene                                                      | -2.5  | 0.433 | -3.18 | 0.014 | 1.62  | 0.303 | -2.07 | 0.478 | -1.53 |
| 1429986_at   | Gpr173            | G-protein coupled receptor 173                                                  | -3.39 | 0.094 | -1.49 | 0.567 | 1.37  | 0.534 | -1.5  | 0.494 | -1.25 |
| 1445525_at   | Kif14             | kinesin family member 14                                                        | -1.28 | 0.244 | -1.27 | 0.599 | -1.3  | 0.569 | 1.51  | 0.47  | -0.58 |
| 1460666_a_at | Ebf3              | early B-cell factor 3                                                           | -1.05 | 0.883 | -1.2  | 0.738 | -1.82 | 0.078 | 1.7   | 0.342 | -0.59 |
| 1455179_at   | Mpp7              | membrane protein, palmitoylated 7 (MAGUK p55 subfamily member 7)                | -1.16 | 0.12  | -1.23 | 0.37  | -1.5  | 0.146 | 1.61  | 0.288 | -0.57 |
| 1460002_at   | Tlk1              | tousled-like kinase 1                                                           | -1.13 | 0.51  | -1.97 | 0.095 | -1.06 | 0.671 | 1.17  | 0.581 | -0.75 |
| 1449431_at   | Trpc6             | transient receptor potential cation channel, subfamily C, member 6              | -1.11 | 0.894 | -1.12 | 0.861 | -1.86 | 0.039 | 1.4   | 0.582 | -0.67 |
| 1455716_at   | ---               | Adult male corpora quadrigemina cDNA, RIKEN full-length enriched library, clone | -1.1  | 0.748 | -1.42 | 0.629 | -1.38 | 0.428 | 1.05  | 0.912 | -0.71 |
| 1442242_at   | C79127            | expressed sequence C79127                                                       | -1.05 | 0.941 | -1.57 | 0.422 | -1.32 | 0.522 | 1.1   | 0.902 | -0.71 |
| 1430946_at   | 2600014E21Rik     | RIKEN cDNA 2600014E21 gene                                                      | 1.35  | 0.555 | -2.12 | 0.003 | -1.92 | 0.067 | -1.66 | 0.516 | -1.09 |
| 1436624_at   | Dnm3              | dynammin 3                                                                      | -1.31 | 0.018 | -1.09 | 0.748 | -1.51 | 0.04  | 1.65  | 0.035 | -0.57 |
| 1440514_at   | D3Ert508e         | DNA segment, Chr 3, ERATO Doi 508, expressed                                    | 1.01  | 0.99  | -1.93 | 0.284 | -1.23 | 0.596 | -1.48 | 0.292 | -0.91 |
| 1447373_at   | 1810015C04Rik     | RIKEN cDNA 1810015C04 gene                                                      | -1.3  | 0.62  | -1.33 | 0.575 | -1.22 | 0.124 | 1.98  | 0.14  | -0.47 |
| 1423085_at   | Efnb3             | ephrin B3                                                                       | -1.22 | 0.819 | -1.52 | 0.322 | -1.16 | 0.578 | 1.41  | 0.131 | -0.62 |
| 1446230_at   | Gm944             | Gene model 944, (NCBI)                                                          | -1.09 | 0.747 | -1.16 | 0.433 | -1.78 | 0.09  | 5.7   | 0.179 | 0.42  |
| 1436404_at   | Tlcd1             | TLC domain containing 1                                                         | -1.2  | 0.023 | -1.19 | 0.262 | -1.49 | 0.031 | 3.81  | 0.228 | -0.02 |
| 1431596_at   | ---               | ---                                                                             | 1.31  | 0.668 | -1.47 | 0.231 | -2.84 | 0.015 | -1.21 | 0.655 | -1.05 |
| 1445312_at   | C530043G21Rik     | RIKEN cDNA C530043G21 gene                                                      | -1.42 | 0.536 | -1.42 | 0.358 | -1.08 | 0.767 | 1.03  | 0.876 | -0.72 |
| 1426638_at   | Six3              | sine oculis-related homeobox 3 homolog (Drosophila)                             | -2.19 | 0.088 | 1.21  | 0.379 | -1.5  | 0.077 | -1.91 | 0.426 | -1.09 |
| 1458865_at   | ---               | ---                                                                             | -1.54 | 0.518 | -1.09 | 0.875 | -1.29 | 0.573 | 1.61  | 0.31  | -0.58 |
| 1451942_x_at | Klra20            | killer cell lectin-like receptor subfamily A, member 20                         | 1.11  | 0.644 | -1.36 | 0.436 | -2.03 | 0.109 | -1.32 | 0.688 | -0.9  |
| 1440603_at   | ---               | Adult male corpus striatum cDNA, RIKEN full-length enriched library, clone:C030 | -2.75 | 0.39  | -1.01 | 0.981 | -1.01 | 0.954 | 1.01  | 0.989 | -0.94 |
| 1459160_at   | Gm879             | Gene model 879, (NCBI)                                                          | -2.92 | 0.438 | 1.18  | 0.825 | -1.22 | 0.606 | -1.8  | 0.492 | -1.19 |
| 1432087_at   | 4933406G16Rik     | RIKEN cDNA 4933406G16 gene                                                      | -1.02 | 0.984 | -1.05 | 0.895 | -2.44 | 0.068 | 1.44  | 0.061 | -0.77 |
| 1454031_at   | 2310029O18Rik     | RIKEN cDNA 2310029O18 gene                                                      | -1.12 | 0.576 | -1.1  | 0.823 | -1.85 | 0.002 | 1.43  | 0.109 | -0.66 |
| 1459094_at   | Snap91            | Synaptosomal-associated protein 91                                              | -1.89 | 0.392 | 1.06  | 0.924 | -1.33 | 0.355 | -1.19 | 0.617 | -0.84 |
| 1425868_at   | Hist2h2bb         | Histone 2, H2bb                                                                 | 1.15  | 0.478 | -2.63 | 0.233 | -1.24 | 0.44  | -1.42 | 0.201 | -1.03 |
| 1440195_at   | Serbp1            | Serpine1 mRNA binding protein 1                                                 | -1.18 | 0.281 | -1.17 | 0.181 | -1.56 | 0.283 | 1.12  | 0.61  | -0.7  |
| 1439930_at   | Smarca2           | SWI/SNF related, matrix associated, actin dependent regulator of chromatin, sub | 1.03  | 0.851 | -1.39 | 0.168 | -1.7  | 0.054 | -1.52 | 0.152 | -0.89 |
| 1458237_at   | ---               | ---                                                                             | -2.95 | 0.411 | -1.08 | 0.905 | 1.08  | 0.921 | -1.15 | 0.879 | -1.03 |
| 1419991_at   | Rab3il1           | RAB3A interacting protein (rabin3)-like 1                                       | 1.04  | 0.964 | -1.32 | 0.351 | -1.83 | 0.156 | -2    | 0.459 | -1.03 |
| 1418558_at   | Rax               | retina and anterior neural fold homeobox                                        | -1.11 | 0.336 | -1.17 | 0.715 | -1.69 | 0.198 | 1.19  | 0.448 | -0.7  |
| 1437482_at   | Srd5a2l2          | steroid 5 alpha-reductase 2-like 2                                              | -1.38 | 0.623 | -1.32 | 0.639 | -1.17 | 0.679 | 1.97  | 0.184 | -0.47 |
| 1445616_at   | Eif4g3            | Eukaryotic translation initiation factor 4 gamma, 3                             | -1.63 | 0.079 | -1.07 | 0.844 | -1.25 | 0.613 | 1.33  | 0.66  | -0.66 |
| 1443651_at   | Phc3              | Polyhomeotic-like 3 (Drosophila)                                                | 1.09  | 0.926 | -1.15 | 0.684 | -2.6  | 0.051 | -1.63 | 0.339 | -1.07 |
| 1429516_at   | Ubr2              | ubiquitin protein ligase E3 component n-recogin 2                               | -1.55 | 0.44  | -1.14 | 0.576 | -1.22 | 0.512 | 1.24  | 0.303 | -0.67 |
| 1423376_a_at | Dok4              | docking protein 4                                                               | -1.02 | 0.929 | -2.16 | 0.398 | -1.11 | 0.639 | 1.28  | 0.454 | -0.75 |
| 1437315_at   | Gpr172b           | G protein-coupled receptor 172B                                                 | -1.14 | 0.114 | -1.08 | 0.777 | -1.84 | 0.175 | 1.78  | 0.043 | -0.57 |
| 1435286_at   | AW125296          | expressed sequence AW125296                                                     | -1.24 | 0.786 | -3.09 | 0.182 | 1.21  | 0.728 | -1.76 | 0.447 | -1.22 |
| 1440529_at   | ---               | Transcribed locus                                                               | -2.47 | 0.098 | -1.46 | 0.335 | 1.25  | 0.667 | -5.19 | 0.013 | -1.97 |
| 1430346_at   | 5730507A09Rik     | RIKEN cDNA 5730507A09 gene                                                      | -1.36 | 0.576 | -1.15 | 0.726 | -1.35 | 0.461 | 1.35  | 0.436 | -0.63 |
| 1446177_at   | ---               | ---                                                                             | -1.87 | 0.041 | -2.04 | 0.051 | 1.32  | 0.538 | -1.08 | 0.699 | -0.92 |
| 1428896_at   | Pdgfrl            | platelet-derived growth factor receptor-like                                    | -1.63 | 0.05  | 1.22  | 0.506 | -1.96 | 0.004 | -1.07 | 0.585 | -0.86 |
| 1450542_s_at | Magea1 /// Magea2 | melanoma antigen, family A, 1 /// melanoma antigen, family A, 2 /// melanoma an | -1.46 | 0.03  | -1.4  | 0.547 | -1.06 | 0.899 | 1.38  | 0.38  | -0.63 |
| 1424152_at   | ---               | CDNA clone IMAGE:30031514                                                       | -1.06 | 0.899 | 1.08  | 0.87  | -3.17 | 0.002 | -1.34 | 0.509 | -1.12 |
| 1458287_at   | ---               | Transcribed locus                                                               | -1.86 | 0.1   | -1.13 | 0.635 | -1.09 | 0.875 | 1.49  | 0.582 | -0.64 |
| 1446494_at   | ---               | Non-coding RNA Kis2-T1 mRNA, complete sequence, alternatively spliced           | 1.07  | 0.827 | -1.42 | 0.336 | -1.77 | 0.176 | -1.17 | 0.771 | -0.82 |
| 1416771_at   | Trappc3           | trafficking protein particle complex 3                                          | -1.83 | 0.352 | -1.31 | 0.526 | 1.03  | 0.943 | -2.3  | 0.211 | -1.1  |
| 1442202_at   | 6430706D22Rik     | RIKEN cDNA 6430706D22 gene                                                      | -1.41 | 0.43  | -1.3  | 0.485 | -1.15 | 0.664 | 1.43  | 0.346 | -0.61 |
| 1424794_at   | Rnf186            | ring finger protein 186                                                         | -1.27 | 0.42  | -1.4  | 0.303 | -1.19 | 0.375 | 1.05  | 0.888 | -0.7  |

|              |                    |                                                                                   |       |       |       |       |       |       |       |       |       |
|--------------|--------------------|-----------------------------------------------------------------------------------|-------|-------|-------|-------|-------|-------|-------|-------|-------|
| 1430428_at   | 2310066F23Rik      | RIKEN cDNA 2310066F23 gene                                                        | -1.43 | 0.03  | 1.03  | 0.854 | -1.63 | 0.062 | -1.32 | 0.04  | -0.84 |
| 1429976_at   | Clasp2             | CLIP associating protein 2                                                        | -1.3  | 0.799 | -1.75 | 0.272 | 1.01  | 0.974 | -1.17 | 0.661 | -0.8  |
| 1421246_at   | Pax9               | paired box gene 9                                                                 | -1.66 | 0.394 | -1.61 | 0.297 | 1.12  | 0.85  | -1.73 | 0.468 | -0.97 |
| 1416697_at   | Dpp4               | dipeptidylpeptidase 4                                                             | 1.01  | 0.945 | -1.19 | 0.056 | -2.03 | 0.088 | -3.01 | 0.05  | -1.3  |
| 1451376_at   | 5730596K20Rik      | RIKEN cDNA 5730596K20 gene                                                        | -1.19 | 0.382 | -1.31 | 0.071 | -1.35 | 0.087 | 1.34  | 0.479 | -0.63 |
| 1444094_at   | ---                | ---                                                                               | 1.02  | 0.904 | -1.72 | 0.028 | -1.35 | 0.36  | -1.89 | 0.173 | -0.98 |
| 1440908_at   | D030063E12         | hypothetical protein D030063E12                                                   | -1.21 | 0.145 | -1.46 | 0.308 | -1.2  | 0.46  | 1.19  | 0.372 | -0.67 |
| 1423892_at   | Apbb1              | amyloid beta (A4) precursor protein-binding, family B, member 1                   | -1.04 | 0.859 | -2.39 | 0.005 | -1.04 | 0.708 | 1.01  | 0.95  | -0.86 |
| 1444808_at   | Pawr               | PRKC, apoptosis, WT1, regulator                                                   | -1.19 | 0.283 | -1.14 | 0.526 | -1.59 | 0.149 | 1.07  | 0.893 | -0.71 |
| 1449790_at   | ---                | ---                                                                               | 1.2   | 0.571 | -1.77 | 0.276 | -1.71 | 0.037 | -1.42 | 0.013 | -0.93 |
| 1446391_at   | Snca               | Synuclein, alpha                                                                  | -1.27 | 0.052 | -1.21 | 0.654 | -1.36 | 0.359 | 6.6   | 0.178 | 0.69  |
| 1446807_at   | Usp8               | ubiquitin specific peptidase 8                                                    | 1.03  | 0.947 | -1.18 | 0.298 | -2.11 | 0.007 | -1.11 | 0.54  | -0.84 |
| 1439635_at   | Rgs9               | regulator of G-protein signaling 9                                                | -2.91 | 0.002 | 1.11  | 0.821 | -1.13 | 0.767 | -2.12 | 0.307 | -1.26 |
| 1456360_at   | Dcun1d1            | DCUN1D1 DCN1, defective in cullin neddylation 1, domain containing 1 (S. cerev    | -1.47 | 0.369 | -1.47 | 0.104 | -1.01 | 0.972 | 1.97  | 0.265 | -0.5  |
| 1432572_at   | 4931406H21Rik      | RIKEN cDNA 4931406H21 gene                                                        | -1.75 | 0.259 | 1.02  | 0.775 | -1.33 | 0.134 | -1.02 | 0.913 | -0.77 |
| 1444804_at   | D17Ert96e          | DNA segment, Chr 17, ERATO Doi 96, expressed                                      | 1.3   | 0.712 | -1.45 | 0.43  | -2.81 | 0.016 | -1.37 | 0.33  | -1.08 |
| 1440149_at   | Pan3               | PAN3 polyA specific ribonuclease subunit homolog (S. cerevisiae)                  | -2.25 | 0.456 | 1.02  | 0.982 | -1.13 | 0.795 | -2.62 | 0.204 | -1.25 |
| 1450863_a_at | Dcamk1             | doublecortin and calcium/calmodulin-dependent protein kinase-like 1               | -1    | 0.967 | -4.04 | 0.004 | 1.1   | 0.64  | -1.58 | 0.221 | -1.38 |
| 1421281_at   | Gabra1             | gamma-aminobutyric acid (GABA-A) receptor, subunit alpha 1                        | -1.04 | 0.899 | -1.34 | 0.596 | -1.57 | 0.355 | 1.13  | 0.806 | -0.7  |
| 1431887_at   | Rbm31y             | RNA binding motif 31, Y-linked                                                    | -2.03 | 0.529 | -1.26 | 0.641 | 1.06  | 0.877 | -2.47 | 0.415 | -1.17 |
| 1443847_x_at | ---                | Transcribed locus                                                                 | 1.61  | 0.168 | -2.22 | 0.105 | -3.43 | 0.004 | -1.12 | 0.814 | -1.29 |
| 1457213_a_at | Dgkh               | diacylglycerol kinase, eta                                                        | -1.35 | 0.168 | -1.54 | 0.148 | -1.04 | 0.759 | 1     | 0.991 | -0.73 |
| 1444183_at   | C030013C21Rik      | RIKEN cDNA C030013C21 gene                                                        | -1.37 | 0.169 | -1    | 0.984 | -1.6  | 0.175 | 2.97  | 0.06  | -0.25 |
| 1438414_at   | Fkrp               | fukutin related protein                                                           | -1.44 | 0.6   | -1.87 | 0.279 | 1.12  | 0.751 | -1.62 | 0.043 | -0.95 |
| 1441214_at   | Exph5              | exophilin 5                                                                       | 1.12  | 0.517 | -1.58 | 0.019 | -1.7  | 0.028 | -1.49 | 0.243 | -0.91 |
| 1419043_a_at | ligp1              | interferon inducible GTPase 1                                                     | -1.07 | 0.804 | -1.31 | 0.064 | -1.54 | 0.126 | 1.1   | 0.66  | -0.7  |
| 1430819_at   | Asah1              | N-acylsphingosine amidohydrolase (acid ceramidase)-like                           | -1.71 | 0.175 | -1.13 | 0.839 | -1.13 | 0.662 | 1.35  | 0.358 | -0.66 |
| 1430983_at   | Pdia6              | protein disulfide isomerase associated 6                                          | -1.06 | 0.83  | -1.31 | 0.524 | -1.57 | 0.065 | 1.24  | 0.63  | -0.67 |
| 1453385_at   | 1110015C02Rik      | RIKEN cDNA 1110015C02 gene                                                        | -1.63 | 0.149 | -1.3  | 0.221 | -1.03 | 0.91  | 1.07  | 0.777 | -0.72 |
| 1420402_at   | Atp2b2             | ATPase, Ca++ transporting, plasma membrane 2                                      | -1.2  | 0.361 | 1.01  | 0.952 | -1.98 | 0.296 | -1.21 | 0.381 | -0.84 |
| 1432864_at   | ---                | ---                                                                               | 1.03  | 0.931 | -1.42 | 0.157 | -1.62 | 0.19  | -1.36 | 0.393 | -0.84 |
| 1456203_at   | 1110020A10Rik      | RIKEN cDNA 1110020A10 gene                                                        | 1.15  | 0.614 | -1.59 | 0.276 | -1.76 | 0.113 | -1.39 | 0.493 | -0.9  |
| 1437654_at   | 3110001K24Rik      | RIKEN cDNA 3110001K24 gene                                                        | -1.31 | 0.231 | -1.82 | 0.032 | 1.04  | 0.786 | -1.42 | 0.274 | -0.88 |
| 1429693_at   | Dab2               | disabled homolog 2 (Drosophila)                                                   | -1.38 | 0.09  | 1.05  | 0.894 | -1.72 | 0.086 | -1.2  | 0.643 | -0.81 |
| 1420245_x_at | Tagln2 /// LOC6724 | transgelin 2 /// similar to transgelin 2                                          | -1    | 0.995 | -1.79 | 0.222 | -1.26 | 0.584 | 1.07  | 0.861 | -0.75 |
| 1441505_at   | ---                | ---                                                                               | -1.13 | 0.516 | -1.03 | 0.926 | -2.04 | 0.005 | 1.18  | 0.527 | -0.76 |
| 1452552_at   | Npn2               | neoplastic progression 2                                                          | -1.83 | 0.432 | 1.47  | 0.33  | -2.97 | 0.092 | -1.31 | 0.607 | -1.16 |
| 1418780_at   | Cyp39a1            | cytochrome P450, family 39, subfamily a, polypeptide 1                            | -2.05 | 0.3   | -1.55 | 0.106 | 1.22  | 0.592 | -3.18 | 0.09  | -1.39 |
| 1427326_at   | 4732471D19Rik      | RIKEN cDNA 4732471D19 gene                                                        | -1.43 | 0.015 | -1.34 | 0.457 | -1.1  | 0.636 | 1.07  | 0.782 | -0.7  |
| 1431092_at   | Ppp1r12c           | protein phosphatase 1, regulatory (inhibitor) subunit 12C                         | -1.43 | 0.362 | -2.66 | 0.207 | 1.28  | 0.326 | -1.11 | 0.812 | -0.98 |
| 1425236_at   | Col20a1            | collagen, type XX, alpha 1                                                        | -1.2  | 0.772 | -1.32 | 0.56  | -1.31 | 0.667 | 1.28  | 0.35  | -0.64 |
| 1456335_at   | Gm106              | gene model 106, (NCBI)                                                            | -1.07 | 0.767 | -1.74 | 0.473 | -1.19 | 0.515 | 2.28  | 0.024 | -0.43 |
| 1431838_at   | 1700128E19Rik      | RIKEN cDNA 1700128E19 gene                                                        | -1.81 | 0.086 | -1.37 | 0.259 | 1.07  | 0.761 | -1.38 | 0.07  | -0.87 |
| 1425636_at   | Hhat               | hedgehog acyltransferase                                                          | 1.06  | 0.673 | -1.25 | 0.46  | -2.04 | 0.091 | -1.16 | 0.637 | -0.85 |
| 1441435_at   | Tbl1x              | Transducin (beta)-like 1 X-linked                                                 | 1.03  | 0.939 | -1.31 | 0.168 | -1.77 | 0.009 | -1.43 | 0.048 | -0.87 |
| 1420926_at   | Arx                | aristaless related homeobox gene (Drosophila)                                     | -1.79 | 0.311 | 1.35  | 0.489 | -2.28 | 0.053 | -1.46 | 0.516 | -1.04 |
| 1429505_at   | 2310076G13Rik      | RIKEN cDNA 2310076G13 gene                                                        | 1.02  | 0.934 | -1.3  | 0.003 | -1.78 | 0.018 | -1.06 | 0.734 | -0.78 |
| 1445126_at   | Ldb2               | LIM domain binding 2                                                              | -1.28 | 0.572 | -1.09 | 0.867 | -1.54 | 0.059 | 1.13  | 0.821 | -0.69 |
| 1424308_at   | Slc24a3            | solute carrier family 24 (sodium/potassium/calcium exchanger), member 3           | -1.14 | 0.611 | -1.9  | 0.034 | -1.06 | 0.801 | 1.09  | 0.76  | -0.75 |
| 1446198_at   | Mier3              | Mesoderm induction early response 1, family member 3                              | -1.73 | 0.251 | 1.08  | 0.732 | -1.43 | 0.164 | -1.31 | 0.111 | -0.85 |
| 1416790_a_at | Tdg /// LOC545124  | thymine DNA glycosylase /// similar to thymine DNA glycosylase isoform 2 /// simi | -1.22 | 0.074 | -1.6  | 0.001 | -1.1  | 0.268 | 1.32  | 0.264 | -0.65 |
| 1442586_at   | Socs2              | suppressor of cytokine signaling 2                                                | -1.13 | 0.019 | -1.11 | 0.573 | -1.78 | 0.068 | 1.11  | 0.459 | -0.73 |
| 1418951_at   | Txlnb              | taxilin beta                                                                      | -3.42 | 0.247 | -2.44 | 0.213 | 1.65  | 0.27  | -1.16 | 0.659 | -1.34 |

|              |               |                                                                                 |       |       |       |       |       |       |       |       |       |
|--------------|---------------|---------------------------------------------------------------------------------|-------|-------|-------|-------|-------|-------|-------|-------|-------|
| 1435931_at   | E130308A19Rik | RIKEN cDNA E130308A19 gene                                                      | -1.29 | 0.129 | -1.06 | 0.79  | -1.58 | 0.051 | 1.28  | 0.354 | -0.66 |
| 1422825_at   | Cart          | cocaine and amphetamine regulated transcript                                    | -1.04 | 0.932 | -3.53 | 0.099 | 1.11  | 0.81  | -3.75 | 0.042 | -1.8  |
| 1440371_at   | ---           | 2 days neonate sympathetic ganglion cDNA, RIKEN full-length enriched library, c | -1.26 | 0.574 | -1.2  | 0.723 | -1.38 | 0.087 | 1.58  | 0.304 | -0.57 |
| 1446632_at   | Caenb2        | Calcium channel, voltage-dependent, beta 2 subunit                              | -1.13 | 0.657 | 1.01  | 0.952 | -2.18 | 0.04  | -1.26 | 0.543 | -0.89 |
| 1428622_at   | Depdc6        | DEP domain containing 6                                                         | -1.06 | 0.615 | -1.33 | 0.018 | -1.53 | 0.043 | 1.02  | 0.879 | -0.72 |
| 1452455_at   | Fer1l3        | fer-1-like 3, myoferlin (C. elegans)                                            | -1.51 | 0.643 | -1.01 | 0.986 | -1.43 | 0.514 | 1.85  | 0.155 | -0.53 |
| 1443276_at   | Htr5a         | 5-hydroxytryptamine (serotonin) receptor 5A                                     | -1.35 | 0.576 | -1.21 | 0.708 | -1.28 | 0.326 | 1.53  | 0.385 | -0.58 |
| 1420803_at   | Tex18         | testis expressed gene 18                                                        | -2.27 | 0.176 | -1.2  | 0.626 | 1.08  | 0.855 | -1.28 | 0.722 | -0.92 |
| 1422076_at   | Acot4         | acyl-CoA thioesterase 4                                                         | 1.03  | 0.932 | -1.47 | 0.269 | -1.55 | 0.442 | -1.65 | 0.564 | -0.91 |
| 1438811_at   | Dlg7          | discs, large homolog 7 (Drosophila)                                             | -1.91 | 0.233 | -1.02 | 0.98  | -1.18 | 0.498 | 3.36  | 0.258 | -0.19 |
| 1423638_at   | Galnt4        | UDP-N-acetyl-alpha-D-galactosamine:polypeptide N-acetylgalactosaminyltransfe    | 1.05  | 0.89  | -1.58 | 0.031 | -1.5  | 0.038 | -1.05 | 0.909 | -0.77 |
| 1459218_at   | D330001F17Rik | RIKEN cDNA D330001F17 gene                                                      | -1.02 | 0.98  | -1.25 | 0.529 | -1.75 | 0.083 | 1.03  | 0.959 | -0.75 |
| 1426544_a_at | Ttc14         | tetratricopeptide repeat domain 14                                              | 1.08  | 0.623 | -1.51 | 0.229 | -1.63 | 0.092 | -1.42 | 0.389 | -0.87 |
| 1430611_at   | Zdhhc25       | zinc finger, DHHC domain containing 25                                          | -5.04 | 0.017 | 1.48  | 0.545 | -1.49 | 0.307 | -1.01 | 0.987 | -1.51 |
| 1428289_at   | Klf9          | Kruppel-like factor 9                                                           | -1.23 | 0.538 | -1.31 | 0.301 | -1.29 | 0.369 | 1.03  | 0.962 | -0.7  |
| 1459010_at   | 5430437P03Rik | RIKEN cDNA 5430437P03 gene                                                      | 1.09  | 0.847 | -1.56 | 0.105 | -1.6  | 0.113 | -1.01 | 0.94  | -0.77 |
| 1434160_at   | Zfp592        | zinc finger protein 592                                                         | -1.36 | 0.403 | -1.42 | 0.055 | -1.1  | 0.608 | 1.07  | 0.691 | -0.7  |
| 1455591_at   | ---           | ---                                                                             | -1.33 | 0.154 | 1.04  | 0.93  | -1.78 | 0.054 | -1.13 | 0.628 | -0.8  |
| 1420462_at   | Il1rapl2      | interleukin 1 receptor accessory protein-like 2                                 | 1.25  | 0.417 | -2.15 | 0.19  | -1.56 | 0.286 | -1.89 | 0.513 | -1.09 |
| 1453117_at   | Surf2         | surfeit gene 2                                                                  | -1.35 | 0.396 | -1.22 | 0.568 | -1.26 | 0.629 | 1.52  | 0.492 | -0.58 |
| 1422550_a_at | Mtap6         | microtubule-associated protein 6                                                | -1.38 | 0.41  | -1.61 | 0.45  | 1.01  | 0.966 | -1.08 | 0.832 | -0.77 |
| 1457166_at   | AA536749      | Expressed sequence AA536749                                                     | -1.25 | 0.278 | 1.1   | 0.828 | -2.17 | 0.016 | -1.24 | 0.474 | -0.89 |
| 1429377_at   | 2410004A20Rik | RIKEN cDNA 2410004A20 gene                                                      | -1.06 | 0.818 | -2.44 | 0.045 | -1    | 0.995 | 1.15  | 0.205 | -0.84 |
| 1440420_at   | Stk24         | Serine/threonine kinase 24 (STE20 homolog, yeast)                               | -2.04 | 0.039 | -1    | 0.999 | -1.15 | 0.791 | 1.73  | 0.244 | -0.62 |
| 1431908_at   | 4933408J17Rik | RIKEN cDNA 4933408J17 gene                                                      | -1.6  | 0.562 | -1.12 | 0.836 | -1.19 | 0.729 | 1.52  | 0.611 | -0.6  |
| 1456862_at   | Six4          | sine oculis-related homeobox 4 homolog (Drosophila)                             | -1.46 | 0.178 | -2.24 | 0.3   | 1.23  | 0.26  | -2.86 | 0.412 | -1.33 |
| 1444430_at   | Armc8         | Armadillo repeat containing 8                                                   | -1.15 | 0.563 | -1.09 | 0.734 | -1.77 | 0.07  | 1.13  | 0.178 | -0.72 |
| 1433814_at   | Wnt5b         | Wingless-related MMTV integration site 5B                                       | -1    | 0.991 | -1.31 | 0.509 | -1.68 | 0.257 | 1.33  | 0.194 | -0.67 |
| 1444425_at   | Zfp53         | Zinc finger protein 53                                                          | 1.04  | 0.895 | -1.74 | 0.185 | -1.36 | 0.148 | -1.1  | 0.776 | -0.79 |
| 1439610_at   | Rab27b        | RAB27b, member RAS oncogene family                                              | -1.05 | 0.633 | -1.19 | 0.647 | -1.78 | 0.006 | 2.56  | 0.332 | -0.37 |
| 1433312_at   | 2700057C20Rik | RIKEN cDNA 2700057C20 gene                                                      | -1.95 | 0.295 | -1.25 | 0.75  | 1.04  | 0.944 | -2.53 | 0.15  | -1.17 |
| 1457988_at   | Sec63         | SEC63-like (S. cerevisiae)                                                      | 1.06  | 0.746 | -1.48 | 0.147 | -1.62 | 0.008 | -1.2  | 0.549 | -0.81 |
| 1446260_at   | Six6os1       | Six6 opposite strand transcript 1                                               | -1.88 | 0.365 | -1.26 | 0.646 | 1.03  | 0.948 | -1.31 | 0.215 | -0.85 |
| 1426250_s_at | 9130404D08Rik | RIKEN cDNA 9130404D08 gene                                                      | 1.02  | 0.935 | -2.58 | 0.036 | -1.05 | 0.815 | -1.02 | 0.899 | -0.91 |
| 1450993_at   | Pask          | PAS domain containing serine/threonine kinase                                   | -1.03 | 0.967 | -1.27 | 0.61  | -1.67 | 0.094 | 2.09  | 0.279 | -0.47 |
| 1457477_at   | Mbnl2         | Muscleblind-like 2                                                              | -1.34 | 0.395 | 1.18  | 0.287 | -2.32 | 0.006 | -1.23 | 0.469 | -0.93 |
| 1460086_at   | ---           | ---                                                                             | 1.02  | 0.939 | -1.49 | 0.374 | -1.51 | 0.262 | -1.05 | 0.813 | -0.76 |
| 1445074_at   | ---           | 16 days neonate heart cDNA, RIKEN full-length enriched library, clone:D830036l  | -1.25 | 0.719 | -2.06 | 0.258 | 1.07  | 0.902 | -1.43 | 0.486 | -0.92 |
| 1454910_at   | ---           | 13 days embryo heart cDNA, RIKEN full-length enriched library, clone:D330008M   | -1.83 | 0.326 | -1.6  | 0.149 | 1.18  | 0.543 | -1.39 | 0.074 | -0.91 |
| 1457760_at   | A930004J17Rik | RIKEN cDNA A930004J17 gene                                                      | -1.02 | 0.871 | -1.24 | 0.225 | -1.74 | 0.137 | 1.41  | 0.143 | -0.65 |
| 1426122_a_at | Coro6         | coronin, actin binding protein 6                                                | -1.37 | 0.624 | -2.24 | 0.093 | 1.18  | 0.264 | -1.17 | 0.432 | -0.9  |
| 1441486_at   | C430014M02Rik | RIKEN cDNA C430014M02 gene                                                      | -1.3  | 0.656 | -1.32 | 0.416 | -1.21 | 0.304 | 1     | 0.993 | -0.71 |
| 1458273_at   | ---           | Transcribed locus                                                               | -1.61 | 0.071 | -1.2  | 0.751 | -1.11 | 0.738 | 1.33  | 0.199 | -0.65 |
| 1442234_at   | LOC667085     | hypothetical protein LOC667085                                                  | -1.68 | 0.36  | -1.27 | 0.563 | -1.03 | 0.916 | 1.73  | 0.049 | -0.56 |
| 1420185_at   | Ssx2ip        | synovial sarcoma, X breakpoint 2 interacting protein                            | -1.64 | 0.593 | -1.16 | 0.575 | -1.13 | 0.342 | 1.77  | 0.151 | -0.54 |
| 1450783_at   | ---           | ---                                                                             | 1.13  | 0.757 | -1.46 | 0.239 | -1.85 | 0.092 | -1.17 | 0.457 | -0.84 |
| 1429814_at   | Pank1         | pantothenate kinase 1                                                           | -1.08 | 0.866 | -1.5  | 0.197 | -1.31 | 0.671 | 1.22  | 0.763 | -0.67 |
| 1446444_at   | Mnab          | membrane associated DNA binding protein                                         | 1.09  | 0.809 | -1.4  | 0.467 | -1.82 | 0.104 | -1.5  | 0.114 | -0.91 |
| 1421000_at   | Cnot4         | CCR4-NOT transcription complex, subunit 4                                       | 1.05  | 0.79  | -1.3  | 0.049 | -1.87 | 0.016 | -1.39 | 0.089 | -0.88 |
| 1445913_at   | A730090H04Rik | RIKEN cDNA A730090H04 gene                                                      | -1.39 | 0.19  | 1.25  | 0.726 | -2.6  | 0.344 | -1.24 | 0.761 | -0.99 |
| 1418903_at   | Aqp2          | aquaporin 2                                                                     | 1.29  | 0.385 | -1.63 | 0.54  | -2.18 | 0.033 | -1.1  | 0.807 | -0.9  |
| 1416733_at   | Mkln1         | muskelin 1, intracellular mediator containing kelch motifs                      | -1.47 | 0.068 | -1.06 | 0.645 | -1.35 | 0.034 | 1.24  | 0.186 | -0.66 |
| 1433161_at   | 1700008N17Rik | RIKEN cDNA 1700008N17 gene                                                      | -1.04 | 0.963 | -1.62 | 0.065 | -1.29 | 0.387 | 1.08  | 0.797 | -0.72 |

|              |               |                                                                                    |       |       |       |       |       |       |       |       |       |
|--------------|---------------|------------------------------------------------------------------------------------|-------|-------|-------|-------|-------|-------|-------|-------|-------|
| 1459576_at   | ---           | ---                                                                                | -1.52 | 0.205 | 1.15  | 0.758 | -1.81 | 0.362 | -1.21 | 0.591 | -0.85 |
| 1421555_at   | Adrb3         | adrenergic receptor, beta 3                                                        | -2.27 | 0.136 | -1.58 | 0.408 | 1.28  | 0.473 | -1.19 | 0.807 | -0.94 |
| 1436428_at   | Chrm2         | cholinergic receptor, nicotinic, beta polypeptide 2 (neuronal)                     | -1.37 | 0.251 | -1.5  | 0.219 | -1.04 | 0.816 | 1.11  | 0.746 | -0.7  |
| 1437920_at   | Epha5         | Eph receptor A5                                                                    | -2.18 | 0.3   | 1.25  | 0.747 | -1.54 | 0.522 | -1.8  | 0.478 | -1.07 |
| 1445400_at   | Hbxip         | Hepatitis B virus x interacting protein                                            | -1.05 | 0.777 | -1.38 | 0.545 | -1.46 | 0.077 | 1.43  | 0.324 | -0.62 |
| 1458262_at   | Exdl1         | Vexonuclease 3'-5' domain-like 1                                                   | -1.19 | 0.758 | -1.55 | 0.069 | -1.15 | 0.8   | 1.05  | 0.935 | -0.71 |
| 1455811_at   | Eif3s6ip      | eukaryotic translation initiation factor 3, subunit 6 interacting protein          | -2.25 | 0.099 | -1.53 | 0.444 | 1.26  | 0.329 | -1.25 | 0.673 | -0.94 |
| 1450221_at   | 4933417A18Rik | RIKEN cDNA 4933417A18 gene                                                         | 1.23  | 0.707 | -1.33 | 0.56  | -2.62 | 0.225 | -1.82 | 0.199 | -1.14 |
| 1423032_at   | Rpl39         | ribosomal protein L39                                                              | -1.71 | 0.036 | -1.3  | 0.427 | 1.01  | 0.973 | -1.07 | 0.898 | -0.77 |
| 1459467_at   | AA986715      | expressed sequence AA986715                                                        | -1.32 | 0.22  | -1.03 | 0.937 | -1.58 | 0.122 | 1.54  | 0.476 | -0.6  |
| 1433135_at   | Golgb1        | golgi autoantigen, golgin subfamily b, macrogolgin 1                               | 1.15  | 0.75  | -2.62 | 0.35  | -1.21 | 0.513 | -1.38 | 0.496 | -1.01 |
| 1435846_x_at | ---           | ---                                                                                | -1.67 | 0.2   | -1.19 | 0.47  | -1.09 | 0.531 | 1.25  | 0.169 | -0.67 |
| 1417067_s_at | Cabc1         | chaperone, ABC1 activity of bc1 complex like (S. pombe)                            | 1.02  | 0.947 | -1.47 | 0.164 | -1.51 | 0.155 | -1.79 | 0.226 | -0.94 |
| 1420723_at   | Vnn3          | vanin 3                                                                            | -1.38 | 0.619 | -1.56 | 0.097 | -1.01 | 0.959 | 1.51  | 0.172 | -0.61 |
| 1419131_at   | F13b          | coagulation factor XIII, beta subunit                                              | -1.21 | 0.381 | -1.09 | 0.179 | -1.62 | 0.284 | 1.33  | 0.594 | -0.65 |
| 1433170_at   | 2900034C19Rik | RIKEN cDNA 2900034C19 gene                                                         | -1.1  | 0.866 | -1.12 | 0.646 | -1.8  | 0.327 | 1.36  | 0.526 | -0.66 |
| 1422826_at   | Igfals        | insulin-like growth factor binding protein, acid labile subunit                    | 1.02  | 0.93  | -1.26 | 0.252 | -1.84 | 0.182 | -1.6  | 0.329 | -0.92 |
| 1457958_at   | Ankrd26       | Ankyrin repeat domain 26                                                           | -1.23 | 0.592 | -1.76 | 0.065 | -1.02 | 0.958 | 1.07  | 0.78  | -0.73 |
| 1438830_at   | ---           | In vitro fertilized eggs cDNA, RIKEN full-length enriched library, clone:7420422E1 | 1.32  | 0.669 | -1.91 | 0.127 | -1.94 | 0.288 | -1.58 | 0.339 | -1.03 |
| 1444250_at   | ---           | ---                                                                                | -1.48 | 0.19  | -1.29 | 0.242 | -1.1  | 0.544 | 1.97  | 0.224 | -0.47 |
| 1443100_at   | Thrb          | Thyroid hormone receptor beta                                                      | 1.08  | 0.473 | -1.37 | 0.132 | -1.8  | 0.017 | -1.14 | 0.448 | -0.81 |
| 1424451_at   | Acaa1b        | acetyl-Coenzyme A acyltransferase 1B                                               | -1.15 | 0.406 | -1.68 | 0.339 | -1.12 | 0.722 | 2.08  | 0.328 | -0.47 |
| 1435530_at   | Camsap1       | calmodulin regulated spectrin-associated protein 1                                 | -1.03 | 0.831 | -1.27 | 0.384 | -1.67 | 0.062 | 1.27  | 0.432 | -0.67 |
| 1444671_at   | Rasal2        | RAS protein activator like 2                                                       | 1.21  | 0.621 | -1.55 | 0.352 | -1.99 | 0.04  | -1.35 | 0.327 | -0.92 |
| 1444790_at   | 1810005K13Rik | RIKEN cDNA 1810005K13 gene                                                         | 1.21  | 0.495 | -2.1  | 0.048 | -1.48 | 0.023 | -1.7  | 0.504 | -1.02 |
| 1444002_at   | Foxl2         | forkhead box L2                                                                    | 1.59  | 0.396 | -1.88 | 0.276 | -4.23 | 0.009 | -1.24 | 0.542 | -1.44 |
| 1415927_at   | Actc1         | actin, alpha, cardiac                                                              | -1.55 | 0.527 | -1.57 | 0.353 | 1.08  | 0.809 | -1.13 | 0.711 | -0.79 |
| 1432161_a_at | Ptar1         | protein prenyltransferase alpha subunit repeat containing 1                        | -1.18 | 0.813 | -1.16 | 0.672 | -1.55 | 0.199 | 1.26  | 0.518 | -0.65 |
| 1420564_at   | Insr          | insulin receptor-related receptor                                                  | -1.93 | 0.061 | 1.12  | 0.314 | -1.38 | 0.456 | -1.48 | 0.474 | -0.92 |
| 1437890_at   | 1500005I02Rik | RIKEN cDNA 1500005I02 gene                                                         | -1.59 | 0.285 | -1.41 | 0.288 | 1.02  | 0.913 | -1.16 | 0.546 | -0.78 |
| 1425353_at   | Enpp3         | ectonucleotide pyrophosphatase/phosphodiesterase 3                                 | -1.33 | 0.512 | -1.03 | 0.948 | -1.57 | 0.517 | 1.48  | 0.419 | -0.61 |
| 1445921_at   | D2Erd397e     | DNA segment, Chr 2, ERATO Doi 397, expressed                                       | 1.22  | 0.371 | -1.64 | 0.358 | -1.89 | 0.366 | -2.25 | 0.409 | -1.14 |
| 1442874_at   | Ascc1         | Activating signal cointegrator 1 complex subunit 1                                 | 1.09  | 0.659 | -1.47 | 0.244 | -1.7  | 0.057 | -2.05 | 0.033 | -1.03 |
| 1442320_at   | LOC553096     | hypothetical LOC553096                                                             | 1.09  | 0.733 | -1.2  | 0.18  | -2.26 | 0.002 | -1.49 | 0.229 | -0.97 |
| 1459370_at   | Cacng5        | Calcium channel, voltage-dependent, gamma subunit 5                                | -1.01 | 0.777 | -1.04 | 0.908 | -2.44 | 0.071 | 1.92  | 0.226 | -0.64 |
| 1432619_at   | ---           | ---                                                                                | -1.72 | 0.484 | -1.28 | 0.547 | -1    | 0.997 | 1.01  | 0.972 | -0.75 |
| 1428740_a_at | Pigt          | phosphatidylinositol glycan anchor biosynthesis, class T                           | -2.32 | 0.344 | -1.64 | 0.512 | 1.32  | 0.411 | -3.63 | 0.152 | -1.57 |
| 1443996_at   | Fgfr2         | Fibroblast growth factor receptor 2                                                | -1.14 | 0.479 | -1.05 | 0.933 | -1.87 | 0.077 | 1.39  | 0.413 | -0.67 |
| 1441031_at   | Padi1         | peptidyl arginine deiminase, type I                                                | -1.36 | 0.528 | -1.65 | 0.289 | 1.02  | 0.956 | -3.6  | 0.003 | -1.4  |
| 1449178_at   | Pdlim3        | PDZ and LIM domain 3                                                               | -1.45 | 0.179 | -1.69 | 0.197 | 1.08  | 0.611 | -1.7  | 0.133 | -0.94 |
| 1439314_at   | Clock         | circadian locomotor output cycles kaput                                            | -1.15 | 0.488 | 1.01  | 0.97  | -2.09 | 0.041 | -1.55 | 0.265 | -0.94 |
| 1442885_at   | Scap          | SREBP cleavage activating protein                                                  | 1.03  | 0.925 | -1.65 | 0.212 | -1.38 | 0.173 | -1.74 | 0.047 | -0.93 |
| 1447074_at   | Zbtb24        | zinc finger and BTB domain containing 24                                           | 1.05  | 0.92  | -1.74 | 0.037 | -1.36 | 0.283 | -1.01 | 0.985 | -0.76 |
| 1417588_at   | Galnt3        | UDP-N-acetyl-alpha-D-galactosamine:polypeptide N-acetylgalactosaminyltransferase 3 | -1.22 | 0.282 | -1.27 | 0.605 | -1.32 | 0.115 | 1.11  | 0.705 | -0.68 |
| 1454050_at   | 4921521D15Rik | RIKEN cDNA 4921521D15 gene                                                         | -1.14 | 0.593 | -1.82 | 0.315 | -1.07 | 0.661 | 1.14  | 0.46  | -0.72 |
| 1441488_at   | ---           | Transcribed locus                                                                  | 1.06  | 0.918 | -1.77 | 0.378 | -1.34 | 0.423 | -1.09 | 0.909 | -0.79 |
| 1439743_at   | AW048948      | expressed sequence AW048948                                                        | -1.31 | 0.61  | -1.25 | 0.434 | -1.24 | 0.414 | 1.32  | 0.327 | -0.62 |
| 1432243_a_at | 4933433G15Rik | RIKEN cDNA 4933433G15 gene                                                         | -1.16 | 0.772 | -1.54 | 0.282 | -1.17 | 0.709 | 1.9   | 0.049 | -0.49 |
| 1434291_a_at | Serf1         | small EDRK-rich factor 1                                                           | -1.47 | 0.396 | -1.01 | 0.967 | -1.44 | 0.004 | 1.03  | 0.909 | -0.72 |
| 1454188_at   | 4921508D12Rik | RIKEN cDNA 4921508D12 gene                                                         | -1.11 | 0.706 | -1.67 | 0.22  | -1.15 | 0.688 | 1.1   | 0.723 | -0.71 |
| 1432709_at   | 4930505O19Rik | RIKEN cDNA 4930505O19 gene                                                         | -1.52 | 0.34  | 1.17  | 0.856 | -1.88 | 0.278 | -2.37 | 0.266 | -1.15 |
| 1454867_at   | Mn1           | meningioma 1                                                                       | 1.04  | 0.896 | -1.95 | 0.086 | -1.24 | 0.458 | -1.5  | 0.199 | -0.91 |
| 1425983_x_at | Hipk2         | homeodomain interacting protein kinase 2                                           | -1.17 | 0.17  | -1.39 | 0.145 | -1.26 | 0.288 | 1.8   | 0.226 | -0.51 |

|              |                      |                                                                                  |       |       |       |       |       |       |       |       |       |
|--------------|----------------------|----------------------------------------------------------------------------------|-------|-------|-------|-------|-------|-------|-------|-------|-------|
| 1457730_at   | Fancm                | Fanconi anemia, complementation group M                                          | -1.85 | 0.087 | -1.13 | 0.549 | -1.06 | 0.596 | 1.26  | 0.364 | -0.7  |
| 1444314_at   | 4921506I22Rik        | RIKEN cDNA 4921506I22 gene                                                       | -1.28 | 0.091 | -1.36 | 0.234 | -1.18 | 0.473 | 1.03  | 0.924 | -0.7  |
| 1458089_at   | Fkbp5                | FK506 binding protein 5                                                          | 1.08  | 0.912 | -1.4  | 0.552 | -1.77 | 0.285 | -1.42 | 0.036 | -0.87 |
| 1430066_at   | 4930589M24Rik        | RIKEN cDNA 4930589M24 gene                                                       | -1.2  | 0.183 | -1.21 | 0.666 | -1.42 | 0.375 | 2.19  | 0.075 | -0.41 |
| 1457607_at   | AW046457             | expressed sequence AW046457                                                      | -4.01 | 0.012 | 1.67  | 0.09  | -2.22 | 0.016 | -1.45 | 0.508 | -1.5  |
| 1432624_at   | 5830487K18Rik        | RIKEN cDNA 5830487K18 gene                                                       | -1.49 | 0.547 | 1.17  | 0.409 | -1.9  | 0.136 | -1.81 | 0.226 | -1.01 |
| 1446822_at   | ---                  | ---                                                                              | -1.73 | 0.123 | -1.3  | 0.16  | 1.02  | 0.909 | -1.3  | 0.649 | -0.83 |
| 1451266_at   | Mrpl50               | mitochondrial ribosomal protein L50                                              | -1.32 | 0.147 | -1.11 | 0.192 | -1.41 | 0.205 | 1.04  | 0.864 | -0.7  |
| 1417057_a_at | Ppid /// Lamp3 /// L | peptidylprolyl isomerase D (cyclophilin D) /// lysosomal-associated membrane prc | -1.14 | 0.424 | -1.23 | 0.019 | -1.48 | 0.058 | 1.13  | 0.627 | -0.68 |
| 1427873_at   | Defcr15              | defensin related cryptdin 15                                                     | -1.35 | 0.481 | 1.11  | 0.721 | -1.95 | 0.033 | -2.41 | 0.14  | -1.15 |
| 1449657_at   | MGC107702            | similar to proteasome (prosome, macropain) subunit, beta type 7                  | -1.17 | 0.293 | -1.38 | 0.328 | -1.27 | 0.123 | 1.03  | 0.874 | -0.7  |
| 1460312_at   | Olfr157              | olfactory receptor 157                                                           | -2.18 | 0.387 | -1.15 | 0.499 | 1.04  | 0.873 | -1.13 | 0.802 | -0.86 |
| 1439307_at   | Cdh2                 | Cadherin 2                                                                       | -1.46 | 0.27  | -1.62 | 0.014 | 1.06  | 0.495 | -1.06 | 0.597 | -0.77 |
| 1445613_at   | Nr2c2                | Nuclear receptor subfamily 2, group C, member 2                                  | 1.03  | 0.785 | -1.3  | 0.23  | -1.76 | 0.101 | -1.49 | 0.118 | -0.88 |
| 1438764_at   | Anxa7                | annexin A7                                                                       | -1.17 | 0.042 | -1.17 | 0.586 | -1.52 | 0.122 | 1.11  | 0.476 | -0.69 |
| 1439400_x_at | 5430433E21Rik        | RIKEN cDNA 5430433E21 gene                                                       | -2.39 | 0.027 | -1.25 | 0.028 | 1.15  | 0.705 | -1.31 | 0.494 | -0.95 |
| 1440059_at   | Map4k5               | Mitogen-activated protein kinase kinase kinase 5                                 | -1.74 | 0.118 | -1.17 | 0.396 | -1.07 | 0.837 | 1.14  | 0.239 | -0.71 |
| 1441734_at   | Camk2a               | Calcium/calmodulin-dependent protein kinase II alpha                             | -2.46 | 0.198 | 1.05  | 0.921 | -1.1  | 0.791 | -2.19 | 0.384 | -1.17 |
| 1445082_at   | Kif16b               | Kinesin family member 16B                                                        | -1.29 | 0.251 | -1.24 | 0.49  | -1.27 | 0.078 | 1.05  | 0.918 | -0.69 |
| 1422420_at   | Mb                   | myoglobin                                                                        | -1.37 | 0.598 | -2.71 | 0.341 | 1.27  | 0.204 | -1.41 | 0.03  | -1.05 |
| 1447445_at   | ---                  | Transcribed locus                                                                | -1.6  | 0.549 | 1.1   | 0.847 | -1.55 | 0.099 | -2.42 | 0.058 | -1.12 |
| 1430305_at   | 2500004C02Rik        | RIKEN cDNA 2500004C02 gene                                                       | -1.56 | 0.178 | -1.26 | 0.594 | -1.07 | 0.777 | 1.1   | 0.564 | -0.7  |
| 1451531_at   | Cbwd1                | COBW domain containing 1                                                         | -1.19 | 0.183 | -1.49 | 0.037 | -1.17 | 0.46  | 1.05  | 0.892 | -0.7  |
| 1454710_at   | Spink2               | serine peptidase inhibitor, Kazal type 2                                         | -1.88 | 0.186 | -1.49 | 0.506 | 1.17  | 0.58  | -1.02 | 0.98  | -0.81 |
| 1425244_a_at | Theg                 | testicular haploid expressed gene                                                | 1.02  | 0.98  | -1.15 | 0.557 | -2.08 | 0.345 | -1.04 | 0.947 | -0.81 |
| 1449602_at   | Kihl5                | Kelch-like 5 (Drosophila)                                                        | -1.66 | 0.333 | 1.16  | 0.74  | -1.64 | 0.193 | -1.47 | 0.414 | -0.9  |
| 1427099_at   | Maz                  | MYC-associated zinc finger protein (purine-binding transcription factor)         | -1.21 | 0.364 | -1.42 | 0.085 | -1.2  | 0.459 | 1.37  | 0.234 | -0.61 |
| 1444970_at   | C79870               | expressed sequence C79870                                                        | -2.01 | 0.213 | -1.07 | 0.863 | -1.07 | 0.85  | 1.09  | 0.636 | -0.76 |
| 1443629_at   | Nav1                 | neuron navigator 1                                                               | -1.11 | 0.837 | -1.88 | 0.064 | -1.07 | 0.866 | 1.09  | 0.799 | -0.74 |
| 1439796_at   | AI747448             | expressed sequence AI747448                                                      | 1.1   | 0.919 | -1.59 | 0.532 | -1.56 | 0.138 | -1.24 | 0.535 | -0.82 |
| 1441034_at   | Itsn1                | Intersectin 1 (SH3 domain protein 1A)                                            | -1.34 | 0.773 | -1.1  | 0.817 | -1.41 | 0.462 | 4.39  | 0.197 | 0.14  |
| 1438337_x_at | 9930032O22Rik        | RIKEN cDNA 9930032O22 gene                                                       | -1.15 | 0.707 | -1.18 | 0.725 | -1.54 | 0.19  | 1.12  | 0.816 | -0.69 |
| 1444445_at   | C77648               | expressed sequence C77648                                                        | 1.02  | 0.924 | -1.17 | 0.189 | -2.02 | 0.009 | -1.33 | 0.24  | -0.88 |
| 1431336_at   | Scara5               | scavenger receptor class A, member 5 (putative)                                  | 1.26  | 0.732 | -2.36 | 0.171 | -1.47 | 0.245 | -1.18 | 0.789 | -0.94 |
| 1442146_at   | Mta3                 | Metastasis associated 3                                                          | -1.28 | 0.754 | -2.28 | 0.054 | 1.15  | 0.298 | -1.01 | 0.914 | -0.86 |
| 1418876_at   | Foxd1                | forkhead box D1                                                                  | -1.23 | 0.333 | -1.42 | 0.585 | -1.17 | 0.802 | 1.68  | 0.274 | -0.54 |
| 1441877_x_at | Tssc1                | tumor suppressing subtransferable candidate 1                                    | -1.1  | 0.882 | -2.07 | 0.066 | -1.02 | 0.96  | 1.33  | 0.137 | -0.72 |
| 1433194_at   | 4930433M22Rik        | RIKEN cDNA 4930433M22 gene                                                       | 1.03  | 0.816 | -1.33 | 0.378 | -1.69 | 0.401 | -1.28 | 0.724 | -0.82 |
| 1459960_at   | ---                  | Transcribed locus                                                                | -1    | 0.97  | -3.78 | 0.016 | 1.11  | 0.857 | -1.06 | 0.916 | -1.18 |
| 1443265_at   | Cd44                 | CD44 antigen                                                                     | -1.22 | 0.154 | -1.67 | 0.5   | -1.05 | 0.866 | 1.16  | 0.676 | -0.69 |
| 1427111_s_at | Raver1               | ribonucleoprotein, PTB-binding 1                                                 | -1.18 | 0.724 | -1.84 | 0.135 | -1.02 | 0.86  | 1.15  | 0.692 | -0.72 |
| 1446102_at   | D9Erd292e            | DNA segment, Chr 9, ERATO Doi 292, expressed                                     | -1.56 | 0.316 | -1.13 | 0.789 | -1.18 | 0.199 | 1.12  | 0.759 | -0.69 |
| 1453339_at   | 1700008I05Rik        | RIKEN cDNA 1700008I05 gene                                                       | -1.62 | 0.572 | 1.12  | 0.823 | -1.59 | 0.545 | -1.75 | 0.142 | -0.96 |
| 1454453_at   | 2610011I18Rik        | RIKEN cDNA 2610011I18 gene                                                       | -1.83 | 0.444 | 1.02  | 0.963 | -1.24 | 0.195 | -1.5  | 0.064 | -0.89 |
| 1429694_at   | 4930402H24Rik        | RIKEN cDNA 4930402H24 gene                                                       | -1.15 | 0.54  | -1.46 | 0.183 | -1.23 | 0.215 | 1.13  | 0.552 | -0.68 |
| 1447366_at   | ---                  | ---                                                                              | -1.89 | 0.384 | -1.29 | 0.313 | 1.07  | 0.863 | -2.65 | 0.029 | -1.19 |
| 1460695_a_at | 2010111I01Rik        | RIKEN cDNA 2010111I01 gene                                                       | -1.2  | 0.096 | -1.25 | 0.375 | -1.36 | 0.002 | 1.02  | 0.859 | -0.7  |
| 1441545_at   | 9230115F04Rik        | RIKEN cDNA 9230115F04 gene                                                       | 1.01  | 0.803 | -1.23 | 0.363 | -1.82 | 0.025 | -2.26 | 0.086 | -1.08 |
| 1435655_at   | Snora65              | small nucleolar RNA, H/ACA box 65                                                | -1.4  | 0.07  | -1.76 | 0.018 | 1.09  | 0.673 | -1.77 | 0.025 | -0.96 |
| 1460226_at   | Trap1a               | tumor rejection antigen P1A                                                      | -1.21 | 0.635 | -1.41 | 0.486 | -1.2  | 0.107 | 1.46  | 0.462 | -0.59 |
| 1447518_at   | Tpx2                 | TPX2, microtubule-associated protein homolog (Xenopus laevis)                    | -1.4  | 0.162 | -1.4  | 0.354 | -1.06 | 0.62  | 1.11  | 0.495 | -0.69 |
| 1442085_at   | Whsc1I1              | Wolf-Hirschhorn syndrome candidate 1-like 1 (human)                              | -1.71 | 0.293 | -1.53 | 0.136 | 1.13  | 0.685 | -1.16 | 0.513 | -0.82 |
| 1457949_at   | ---                  | Transcribed locus                                                                | -1.27 | 0.056 | -1.22 | 0.142 | -1.31 | 0.11  | 1.1   | 0.734 | -0.67 |

|              |               |                                                                              |       |       |       |       |       |       |       |       |       |
|--------------|---------------|------------------------------------------------------------------------------|-------|-------|-------|-------|-------|-------|-------|-------|-------|
| 1459188_at   | Ryk           | Receptor-like tyrosine kinase                                                | -1.22 | 0.798 | 1.21  | 0.801 | -2.9  | 0.309 | -1.6  | 0.67  | -1.13 |
| 1429256_at   | Gtl2          | GTL2, imprinted maternally expressed untranslated mRNA                       | -1.61 | 0.205 | -1.15 | 0.664 | -1.14 | 0.757 | 1.09  | 0.862 | -0.7  |
| 1446178_at   | Bicc1         | Bicaudal C homolog 1 (Drosophila)                                            | 1.04  | 0.796 | -1.07 | 0.919 | -2.51 | 0.044 | -2.82 | 0.013 | -1.34 |
| 1444247_at   | C81557        | expressed sequence C81557                                                    | -1.04 | 0.898 | -1.29 | 0.571 | -1.58 | 0.13  | 1.49  | 0.174 | -0.6  |
| 1446090_at   | ---           | 15 days embryo head cDNA, RIKEN full-length enriched library, clone:D930002E | -1.03 | 0.946 | -1.34 | 0.078 | -1.53 | 0.022 | 1.75  | 0.054 | -0.54 |
| 1455959_s_at | ---           | ---                                                                          | -1.37 | 0.028 | -1.38 | 0.036 | -1.09 | 0.289 | 2.58  | 0.206 | -0.31 |
| 1439813_at   | Sppl3         | Signal peptide peptidase 3                                                   | -1.07 | 0.72  | -1.1  | 0.04  | -1.9  | 0.016 | 1.21  | 0.38  | -0.71 |
| 1443696_s_at | Habp2         | hyaluronic acid binding protein 2                                            | 1.02  | 0.973 | -1.02 | 0.96  | -2.69 | 0.037 | -1.62 | 0.237 | -1.08 |
| 1431763_a_at | Ctrl          | chymotrypsin-like                                                            | 1.18  | 0.558 | -2.97 | 0.13  | -1.16 | 0.429 | -1.49 | 0.209 | -1.11 |
| 1440297_at   | 4931406I20Rik | RIKEN cDNA 4931406I20 gene                                                   | 1.12  | 0.814 | -1.43 | 0.599 | -1.79 | 0.214 | -1.57 | 0.017 | -0.92 |
| 1422816_a_at | Mutyh         | mutY homolog (E. coli)                                                       | -1.08 | 0.724 | -3.03 | 0.043 | 1.12  | 0.366 | -1.53 | 0.07  | -1.13 |
| 1454243_at   | Ick           | intestinal cell kinase                                                       | -1.02 | 0.928 | -1.22 | 0.319 | -1.77 | 0.037 | 1.18  | 0.149 | -0.7  |
| 1424846_at   | Cep68         | centrosomal protein 68                                                       | -1.38 | 0.353 | -1.24 | 0.082 | -1.18 | 0.342 | 1.08  | 0.611 | -0.68 |
| 1448841_at   | Pfpl          | pore forming protein-like                                                    | -1.05 | 0.821 | 1.02  | 0.919 | -2.5  | 0.043 | -1.16 | 0.791 | -0.92 |
| 1443278_at   | Dcc           | Deleted in colorectal carcinoma                                              | -1.56 | 0.05  | -1.14 | 0.801 | -1.17 | 0.825 | 1.2   | 0.354 | -0.67 |
| 1433182_at   | 4930431N21Rik | RIKEN cDNA 4930431N21 gene                                                   | 1.13  | 0.235 | -1.63 | 0.464 | -1.58 | 0.269 | -1.1  | 0.154 | -0.79 |
| 1458551_at   | Mef2c         | Myocyte enhancer factor 2C                                                   | 1.23  | 0.566 | -1.77 | 0.371 | -1.71 | 0.191 | -1.84 | 0.176 | -1.02 |
| 1458142_at   | Zdhhc9        | zinc finger, DHHC domain containing 9                                        | -1.56 | 0.256 | 1.02  | 0.95  | -1.4  | 0.215 | -1.06 | 0.811 | -0.75 |
| 1439638_at   | ErbB2ip       | ErbB2 interacting protein                                                    | -1.23 | 0.442 | 1.04  | 0.878 | -1.9  | 0.073 | -1.65 | 0.092 | -0.94 |
| 1441237_at   | D5ErtD163e    | DNA segment, Chr 5, ERATO Doi 163, expressed                                 | -1.05 | 0.941 | -1.25 | 0.619 | -1.6  | 0.376 | 2.48  | 0.107 | -0.36 |
| 1438923_at   | Fibp          | Fibroblast growth factor (acidic) intracellular binding protein              | -1.13 | 0.865 | -1.74 | 0.041 | -1.1  | 0.9   | 3.84  | 0.324 | -0.03 |
| 1421619_at   | Kcnh3         | potassium voltage-gated channel, subfamily H (eag-related), member 3         | -1.39 | 0.19  | -1.54 | 0.289 | 1     | 0.995 | -1.03 | 0.87  | -0.74 |
| 1440391_at   | LOC638038     | hypothetical protein LOC638038                                               | -1.34 | 0.027 | -1.38 | 0.226 | -1.1  | 0.499 | 1.02  | 0.914 | -0.7  |
| 1429793_at   | 1600014K23Rik | RIKEN cDNA 1600014K23 gene                                                   | -1.06 | 0.821 | -1.12 | 0.753 | -1.84 | 0.16  | 2.68  | 0.046 | -0.34 |
| 1421726_at   | Ap4b1         | adaptor-related protein complex AP-4, beta 1                                 | -1.39 | 0.085 | -1.42 | 0.183 | -1.05 | 0.726 | 1.16  | 0.425 | -0.67 |
| 1434597_at   | Larp5         | La ribonucleoprotein domain family, member 5                                 | -1.12 | 0.223 | -1.33 | 0.046 | -1.36 | 0.007 | 1.27  | 0.195 | -0.64 |
| 1433273_at   | 2610200G18Rik | RIKEN cDNA 2610200G18 gene                                                   | -1.64 | 0.174 | -1.2  | 0.74  | -1.07 | 0.592 | 1.38  | 0.49  | -0.63 |
| 1456252_x_at | Ap1s2         | adaptor-related protein complex 1, sigma 2 subunit                           | -1.42 | 0.247 | -1.05 | 0.92  | -1.39 | 0.388 | 1.61  | 0.559 | -0.56 |
| 1441143_at   | E130309D14Rik | RIKEN cDNA E130309D14 gene                                                   | -1.87 | 0.231 | -1.99 | 0.393 | 1.34  | 0.131 | -1.12 | 0.531 | -0.91 |
| 1451515_s_at | Glyat         | glycine-N-acyltransferase                                                    | -1.36 | 0.052 | -1.18 | 0.095 | -1.26 | 0.251 | 1.49  | 0.238 | -0.58 |
| 1430651_s_at | Zfp191        | zinc finger protein 191                                                      | 1.06  | 0.734 | -1.34 | 0.514 | -1.76 | 0.103 | -1.2  | 0.337 | -0.81 |
| 1444109_at   | C130009A20Rik | RIKEN cDNA C130009A20 gene                                                   | 1.06  | 0.892 | -1.5  | 0.277 | -1.54 | 0.106 | -1.1  | 0.498 | -0.77 |
| 1424992_at   | Tprkb         | Tp53rk binding protein                                                       | -1.11 | 0.729 | -1.19 | 0.344 | -1.57 | 0.328 | 1.27  | 0.189 | -0.65 |
| 1438823_at   | ---           | Transcribed locus                                                            | -1.68 | 0.062 | 1.1   | 0.836 | -1.47 | 0.457 | -2.18 | 0.177 | -1.06 |
| 1433379_at   | 9430019H13Rik | RIKEN cDNA 9430019H13 gene                                                   | -1.13 | 0.28  | -1.47 | 0.304 | -1.23 | 0.054 | 1.3   | 0.516 | -0.63 |
| 1430178_at   | 2810408A11Rik | RIKEN cDNA 2810408A11 gene                                                   | -1.45 | 0.245 | -1.55 | 0.382 | 1.04  | 0.714 | -1.26 | 0.627 | -0.8  |
| 1435523_s_at | 2700089E24Rik | RIKEN cDNA 2700089E24 gene                                                   | -1.62 | 0.106 | -1.32 | 0.467 | 1     | 0.983 | -1.16 | 0.388 | -0.78 |
| 1436228_at   | ---           | ---                                                                          | -1.14 | 0.633 | -1.22 | 0.401 | -1.47 | 0.054 | 1.06  | 0.706 | -0.69 |
| 1435445_at   | Ccnt2         | cyclin T2                                                                    | -1.08 | 0.813 | -1.2  | 0.36  | -1.62 | 0.091 | 1.01  | 0.972 | -0.72 |
| 1443722_at   | 6030419C18Rik | RIKEN cDNA 6030419C18 gene                                                   | -1.3  | 0.1   | -1.04 | 0.857 | -1.55 | 0.07  | 1.08  | 0.827 | -0.7  |
| 1434840_at   | Hrb           | HIV-1 Rev binding protein                                                    | -1.11 | 0.477 | -1.3  | 0.014 | -1.42 | 0.045 | 1.13  | 0.611 | -0.67 |
| 1417952_at   | Cyp2j6        | cytochrome P450, family 2, subfamily j, polypeptide 6                        | -2.01 | 0.038 | 1.06  | 0.699 | -1.23 | 0.377 | -1.06 | 0.835 | -0.81 |
| 1416305_at   | Sh3bp4        | SH3-domain binding protein 4                                                 | -1.11 | 0.432 | -2.45 | 0.142 | 1.06  | 0.111 | -1.47 | 0.127 | -0.99 |
| 1458857_at   | ---           | Transcribed locus                                                            | -1.31 | 0.595 | 1.03  | 0.915 | -1.71 | 0.056 | -1.1  | 0.813 | -0.77 |
| 1459376_at   | Hivep2        | Human immunodeficiency virus type I enhancer binding protein 2               | 1.03  | 0.912 | -1.19 | 0.325 | -1.97 | 0.012 | -1.71 | 0.167 | -0.96 |
| 1420136_a_at | ---           | ---                                                                          | -1.1  | 0.579 | -1.22 | 0.064 | -1.54 | 0.176 | 2.37  | 0.244 | -0.37 |
| 1446902_at   | AU022538      | expressed sequence AU022538                                                  | -1.16 | 0.524 | -1.55 | 0.317 | -1.15 | 0.647 | 2.43  | 0.071 | -0.36 |
| 1458500_at   | AU021034      | expressed sequence AU021034                                                  | -2.26 | 0.308 | -1.13 | 0.829 | 1.05  | 0.831 | -1.13 | 0.771 | -0.87 |
| 1444330_at   | D2ErtD173e    | DNA segment, Chr 2, ERATO Doi 173, expressed                                 | -1.8  | 0.537 | -1.86 | 0.384 | 1.28  | 0.736 | -1.11 | 0.801 | -0.87 |
| 1450683_at   | Tagln3        | transgelin 3                                                                 | -1.19 | 0.69  | 1.16  | 0.671 | -2.68 | 0.023 | -1.25 | 0.731 | -0.99 |
| 1445415_at   | B230303A05    | Hypothetical protein B230303A05                                              | -2.57 | 0.396 | -1.34 | 0.319 | 1.24  | 0.359 | -1.51 | 0.233 | -1.05 |
| 1443402_at   | Phka2         | Phosphorylase kinase alpha 2                                                 | -1.53 | 0.365 | 1.07  | 0.811 | -1.53 | 0.163 | -1.25 | 0.252 | -0.81 |
| 1435765_at   | E130114P18Rik | RIKEN cDNA E130114P18 gene                                                   | -1.57 | 0.58  | -1.06 | 0.837 | -1.25 | 0.196 | 2.31  | 0.022 | -0.39 |

|              |               |                                                                               |       |       |        |       |       |       |       |       |       |
|--------------|---------------|-------------------------------------------------------------------------------|-------|-------|--------|-------|-------|-------|-------|-------|-------|
| 1454833_at   | Rpl35         | ribosomal protein L35                                                         | -1.5  | 0.031 | -1.13  | 0.662 | -1.21 | 0.602 | 1.09  | 0.778 | -0.69 |
| 1436440_at   | B230107K20Rik | RIKEN cDNA B230107K20 gene                                                    | -1.24 | 0.404 | -1.48  | 0.342 | -1.12 | 0.618 | 1.04  | 0.725 | -0.7  |
| 1447691_x_at | Bicc1         | Bicaudal C homolog 1 (Drosophila)                                             | -1.17 | 0.502 | -1.22  | 0.621 | -1.42 | 0.059 | 1.1   | 0.598 | -0.68 |
| 1439420_x_at | Ggtla1        | gamma-glutamyltransferase-like activity 1                                     | -1.22 | 0.636 | -1.11  | 0.786 | -1.52 | 0.028 | 1.2   | 0.757 | -0.66 |
| 1445215_at   | 2600003E23Rik | RIKEN cDNA 2600003E23 gene                                                    | -1.19 | 0.632 | 1.03   | 0.926 | -1.96 | 0.155 | -1    | 0.995 | -0.78 |
| 1423173_at   | Napb          | N-ethylmaleimide sensitive fusion protein attachment protein beta             | -1.43 | 0.005 | 1.2    | 0.395 | -2.09 | 0.066 | -1.03 | 0.848 | -0.84 |
| 1459411_at   | Sdccag10      | Serologically defined colon cancer antigen 10                                 | -1.31 | 0.078 | 1.05   | 0.834 | -1.78 | 0.114 | -1.21 | 0.506 | -0.81 |
| 1432723_at   | 4933408K01Rik | RIKEN cDNA 4933408K01 gene                                                    | -1.22 | 0.591 | -1.05  | 0.915 | -1.64 | 0.399 | 1.4   | 0.314 | -0.63 |
| 1443778_at   | LOC672274     | similar to Transcription factor SOX-4                                         | -1.54 | 0.519 | 1.19   | 0.167 | -1.85 | 0.236 | -1.23 | 0.75  | -0.86 |
| 1421689_at   | Krtap8-2      | keratin associated protein 8-2                                                | -3.33 | 0.167 | -1.07  | 0.81  | 1.14  | 0.808 | -1.14 | 0.722 | -1.1  |
| 1447286_at   | Emb           | Embigin                                                                       | -1.71 | 0.601 | 1.09   | 0.882 | -1.43 | 0.239 | -4.2  | 0.035 | -1.56 |
| 1439298_at   | ---           | ---                                                                           | -1.09 | 0.535 | -1.28  | 0.009 | -1.47 | 0.23  | 1.01  | 0.95  | -0.71 |
| 1458757_at   | Ptpb2         | Polypyrimidine tract binding protein 2                                        | -2.38 | 0.273 | -1.12  | 0.872 | 1.07  | 0.832 | -1.32 | 0.664 | -0.94 |
| 1457080_at   | ---           | Transcribed locus                                                             | 1.06  | 0.854 | -2.3   | 0.157 | -1.13 | 0.72  | -1.45 | 0.314 | -0.96 |
| 1425010_at   | Zfp119        | zinc finger protein 119                                                       | -1.88 | 0.028 | 1.11   | 0.621 | -1.36 | 0.495 | -1.04 | 0.908 | -0.79 |
| 1440565_at   | Zbtb20        | Zinc finger and BTB domain containing 20                                      | -1.54 | 0.083 | -1.13  | 0.488 | -1.18 | 0.407 | 1.39  | 0.233 | -0.62 |
| 1434595_at   | Trim9         | tripartite motif protein 9                                                    | -1.25 | 0.707 | -1.21  | 0.532 | -1.32 | 0.136 | 1.32  | 0.323 | -0.62 |
| 1457970_at   | ---           | ---                                                                           | 1.19  | 0.261 | -1.69  | 0.222 | -1.67 | 0.125 | -1.18 | 0.119 | -0.84 |
| 1451404_at   | ORF19         | open reading frame 19                                                         | -1.09 | 0.703 | -1.63  | 0.095 | -1.18 | 0.399 | 1.03  | 0.912 | -0.72 |
| 1435064_a_at | Tmem27        | transmembrane protein 27                                                      | -1.11 | 0.367 | -14.72 | 0.127 | 1.41  | 0.502 | -1.27 | 0.235 | -3.92 |
| 1456701_at   | B230208H17Rik | RIKEN cDNA B230208H17 gene                                                    | 1.05  | 0.924 | -1.43  | 0.413 | -1.57 | 0.105 | -1.97 | 0.178 | -0.98 |
| 1455536_at   | A630023A22Rik | RIKEN cDNA A630023A22 gene                                                    | -1.12 | 0.823 | 1.05   | 0.901 | -2.32 | 0.022 | -2.11 | 0.353 | -1.12 |
| 1439150_x_at | Grtp1         | GH regulated TBC protein 1                                                    | -1.11 | 0.571 | -1.15  | 0.518 | -1.64 | 0.415 | 3.06  | 0.073 | -0.21 |
| 1456496_at   | Dapk3         | Death-associated kinase 3                                                     | -2.63 | 0.086 | -1.17  | 0.655 | 1.15  | 0.748 | -1.03 | 0.929 | -0.92 |
| 1435260_at   | ---           | ---                                                                           | 1.16  | 0.254 | -1.59  | 0.068 | -1.69 | 0.011 | -1.8  | 0.017 | -0.98 |
| 1435726_at   | Lima1         | LIM domain and actin binding 1                                                | -1.42 | 0.497 | -1.4   | 0.14  | -1.04 | 0.938 | 2.95  | 0.049 | -0.23 |
| 1458477_at   | ---           | 3 days neonate thymus cDNA, RIKEN full-length enriched library, clone:A630098 | -1.38 | 0.442 | -1.58  | 0.466 | 1.02  | 0.963 | -1.2  | 0.495 | -0.78 |
| 1442126_at   | 5830417C01Rik | RIKEN cDNA 5830417C01 gene                                                    | 1.12  | 0.715 | -1.25  | 0.234 | -2.17 | 0.051 | -2.35 | 0.061 | -1.16 |
| 1459845_at   | Cbx5          | Chromobox homolog 5 (Drosophila HP1a)                                         | -1.41 | 0.093 | -1.13  | 0.805 | -1.27 | 0.546 | 1.55  | 0.255 | -0.57 |
| 1435384_at   | Ube2n         | ubiquitin-conjugating enzyme E2N                                              | -1.18 | 0.499 | -1.21  | 0.263 | -1.41 | 0.039 | 1.2   | 0.226 | -0.65 |
| 1456299_at   | E330012B07Rik | RIKEN cDNA E330012B07 gene                                                    | 1.46  | 0.685 | -3.67  | 0.029 | -1.53 | 0.201 | -1.34 | 0.235 | -1.27 |
| 1432679_at   | Itgav         | integrin alpha V                                                              | -1.52 | 0.127 | 1.08   | 0.869 | -1.55 | 0.058 | -1.52 | 0.423 | -0.88 |
| 1449480_at   | Sap18         | Sin3-associated polypeptide 18                                                | 1.01  | 0.966 | -1.46  | 0.053 | -1.44 | 0.015 | -1.35 | 0.032 | -0.81 |
| 1435000_at   | Gspt1         | G1 to S phase transition 1                                                    | -1.21 | 0.063 | -1.28  | 0.021 | -1.29 | 0.001 | 1.03  | 0.887 | -0.69 |
| 1424097_at   | Elovl7        | ELOVL family member 7, elongation of long chain fatty acids (yeast)           | -1.03 | 0.758 | -1.32  | 0.583 | -1.52 | 0.11  | 1.74  | 0.114 | -0.53 |
| 1445088_at   | Magi1         | Membrane associated guanylate kinase, WW and PDZ domain containing 1          | -2.15 | 0.506 | 1.2    | 0.148 | -1.39 | 0.489 | -1.24 | 0.498 | -0.89 |
| 1432567_at   | A430105D02Rik | RIKEN cDNA A430105D02 gene                                                    | -1.28 | 0.552 | -2.01  | 0.243 | 1.1   | 0.863 | -1.16 | 0.684 | -0.84 |
| 1415712_at   | Zranb1        | zinc finger, RAN-binding domain containing 1                                  | 1.06  | 0.222 | -1.27  | 0.196 | -1.87 | 0.003 | -1    | 0.983 | -0.77 |
| 1430416_at   | 4931431B13Rik | RIKEN cDNA 4931431B13 gene                                                    | -3.01 | 0.005 | 1.25   | 0.509 | -1.26 | 0.633 | -1.06 | 0.884 | -1.02 |
| 1440404_at   | ---           | ---                                                                           | -1.13 | 0.552 | 1.09   | 0.816 | -2.44 | 0.03  | -1.32 | 0.412 | -0.95 |
| 1422332_at   | Ifna11        | interferon alpha 11                                                           | -1.86 | 0.186 | -1.88  | 0.142 | 1.32  | 0.47  | -1.13 | 0.421 | -0.89 |
| 1442958_at   | ---           | Lung RCB-0558 LLC cDNA, RIKEN full-length enriched library, clone:G730002LC   | -2.57 | 0.056 | 1.55   | 0.451 | -2.25 | 0.121 | -1.33 | 0.227 | -1.15 |
| 1424132_at   | Hras1         | Harvey rat sarcoma virus oncogene 1                                           | -1.13 | 0.701 | -1.34  | 0.399 | -1.33 | 0.111 | 1.38  | 0.344 | -0.6  |
| 1444286_at   | ---           | Transcribed locus, weakly similar to XP_530798.1 PREDICTED: hypothetical pro  | -1.44 | 0.498 | -1.08  | 0.841 | -1.31 | 0.529 | 1.04  | 0.908 | -0.7  |
| 1433147_at   | Cald1         | caldesmon 1                                                                   | -1.05 | 0.924 | 1.05   | 0.82  | -2.63 | 0.06  | -1.7  | 0.125 | -1.08 |
| 1459551_at   | ---           | ---                                                                           | 1.27  | 0.694 | -2.39  | 0.103 | -1.43 | 0.368 | -2.52 | 0.296 | -1.27 |
| 1446618_at   | LOC432971     | hypothetical gene supported by AK038224                                       | -1.24 | 0.108 | -1.08  | 0.546 | -1.53 | 0.123 | 1.13  | 0.369 | -0.68 |
| 1459663_at   | ---           | ---                                                                           | -1.56 | 0.381 | 1.22   | 0.648 | -1.91 | 0.076 | -1.62 | 0.041 | -0.97 |
| 1453388_at   | 4933416M07Rik | RIKEN cDNA 4933416M07 gene                                                    | 1.06  | 0.869 | -1.53  | 0.44  | -1.49 | 0.147 | -1.83 | 0.433 | -0.95 |
| 1459461_at   | ---           | ---                                                                           | -1.21 | 0.359 | -1.19  | 0.629 | -1.39 | 0.028 | 1.11  | 0.678 | -0.67 |
| 1432484_at   | 2310061C15Rik | RIKEN cDNA 2310061C15 gene                                                    | -1.09 | 0.789 | -2.08  | 0.148 | -1.02 | 0.926 | 1.53  | 0.177 | -0.66 |
| 1438249_at   | Usp7          | Ubiquitin specific peptidase 7                                                | -1.1  | 0.155 | -1.34  | 0.001 | -1.37 | 0.297 | 1.28  | 0.456 | -0.63 |
| 1425175_at   | C1ql3         | C1q-like 3                                                                    | -1.54 | 0.324 | -1.52  | 0.122 | 1.08  | 0.866 | -1.02 | 0.941 | -0.75 |

|              |               |                                                                                |       |       |       |       |       |       |       |       |       |
|--------------|---------------|--------------------------------------------------------------------------------|-------|-------|-------|-------|-------|-------|-------|-------|-------|
| 1458984_at   | E130308A19Rik | RIKEN cDNA E130308A19 gene                                                     | -1.05 | 0.685 | -1.4  | 0.22  | -1.39 | 0.009 | 1.37  | 0.28  | -0.62 |
| 1457177_at   | Rora          | RAR-related orphan receptor alpha                                              | -1.11 | 0.678 | -1.02 | 0.903 | -1.99 | 0.044 | 1.14  | 0.694 | -0.74 |
| 1447336_at   | ---           | Adult male kidney cDNA, RIKEN full-length enriched library, clone:F530012N16 p | -1.18 | 0.817 | -1.64 | 0.117 | -1.08 | 0.894 | 1.79  | 0.361 | -0.53 |
| 1459622_at   | Gm22          | gene model 22, (NCBI)                                                          | -1.58 | 0.191 | -1.09 | 0.762 | -1.21 | 0.362 | 1.07  | 0.815 | -0.7  |
| 1456535_at   | Vps13c        | vacuolar protein sorting 13C (yeast)                                           | -1.53 | 0.049 | -1.28 | 0.56  | -1.05 | 0.904 | 1.21  | 0.71  | -0.66 |
| 1451150_at   | Zfp410        | zinc finger protein 410                                                        | -1.27 | 0.264 | -1.28 | 0.063 | -1.23 | 0.403 | 1.38  | 0.373 | -0.6  |
| 1450265_at   | Smad9         | MAD homolog 9 (Drosophila)                                                     | -2.23 | 0.105 | 1.08  | 0.902 | -1.17 | 0.694 | -1.07 | 0.908 | -0.85 |
| 1460510_a_at | Coq10b        | coenzyme Q10 homolog B (S. cerevisiae)                                         | -1.27 | 0.506 | -1.29 | 0.462 | -1.22 | 0.273 | 1.44  | 0.381 | -0.58 |
| 1433098_at   | ---           | ---                                                                            | -1.93 | 0.057 | 1.18  | 0.768 | -1.45 | 0.305 | -2.06 | 0.069 | -1.07 |
| 1454939_at   | Phf20l1       | PHD finger protein 20-like 1                                                   | -1.33 | 0.422 | -1.31 | 0.368 | -1.15 | 0.408 | 1.23  | 0.235 | -0.64 |
| 1454239_at   | 4930578G10Rik | RIKEN cDNA 4930578G10 gene                                                     | -1.42 | 0.409 | 1.02  | 0.983 | -1.5  | 0.312 | -1.17 | 0.717 | -0.77 |
| 1456276_at   | ---           | ---                                                                            | -1.3  | 0.557 | -1.2  | 0.69  | -1.28 | 0.677 | 1.25  | 0.571 | -0.63 |
| 1445067_at   | Arfgap1       | ADP-ribosylation factor GTPase activating protein 1                            | -1.12 | 0.11  | -1.23 | 0.281 | -1.47 | 0.058 | 1.17  | 0.218 | -0.66 |
| 1429169_at   | Rbm3          | RNA binding motif protein 3                                                    | -1.17 | 0.583 | -1.33 | 0.234 | -1.29 | 0.41  | 1.26  | 0.353 | -0.63 |
| 1439983_a_at | Accn3         | amiloride-sensitive cation channel 3                                           | -1.09 | 0.664 | -2.31 | 0.229 | 1.03  | 0.842 | -2.22 | 0.418 | -1.15 |
| 1440660_at   | Nfia          | Nuclear factor I/A                                                             | -1.27 | 0.072 | -1.06 | 0.737 | -1.52 | 0.087 | 1.49  | 0.052 | -0.59 |
| 1442990_at   | ---           | ---                                                                            | -1.66 | 0.618 | -1.34 | 0.621 | 1.03  | 0.944 | -1.11 | 0.774 | -0.77 |
| 1420162_at   | AA409749      | expressed sequence AA409749                                                    | -2.13 | 0.195 | -3.27 | 0.059 | 1.61  | 0.214 | -1.63 | 0.473 | -1.35 |
| 1451539_at   | Baiap2l1      | BAI1-associated protein 2-like 1                                               | -1.01 | 0.958 | -1.43 | 0.344 | -1.44 | 0.005 | 1.44  | 0.556 | -0.61 |
| 1459882_at   | ---           | ---                                                                            | -1.3  | 0.198 | -1.43 | 0.052 | -1.09 | 0.706 | 1.49  | 0.07  | -0.58 |
| 1459360_at   | Sp3           | Trans-acting transcription factor 3                                            | -1.32 | 0.21  | 1.08  | 0.629 | -1.82 | 0.04  | -1.3  | 0.211 | -0.84 |
| 1431199_at   | 0610031G08Rik | RIKEN cDNA 0610031G08 gene                                                     | -1.51 | 0.096 | -1.42 | 0.046 | 1.02  | 0.965 | -1.41 | 0.482 | -0.83 |
| 1453137_at   | Fbxo30        | F-box protein 30                                                               | -1.14 | 0.455 | -1.31 | 0.202 | -1.34 | 0.002 | 5.13  | 0.204 | 0.34  |
| 1456804_at   | Av381130      | hypothetical protein LOC627821                                                 | -3.8  | 0.007 | -1.25 | 0.463 | 1.32  | 0.586 | -1.68 | 0.532 | -1.35 |
| 1453337_at   | 1700013E18Rik | RIKEN cDNA 1700013E18 gene                                                     | -1.39 | 0.309 | 1.02  | 0.942 | -1.55 | 0.427 | -1.3  | 0.725 | -0.8  |
| 1437853_x_at | Ndn           | necdin                                                                         | 1.13  | 0.682 | -1.68 | 0.161 | -1.51 | 0.222 | -1.54 | 0.274 | -0.9  |
| 1429064_at   | Dip2c         | DIP2 disco-interacting protein 2 homolog C (Drosophila)                        | -1.24 | 0.031 | -1.09 | 0.434 | -1.51 | 0.088 | 1.21  | 0.403 | -0.66 |
| 1456242_at   | Esgp          | embryonic stem cell- and germ cell-specific protein                            | 1.02  | 0.949 | -1.94 | 0.413 | -1.17 | 0.822 | -1.27 | 0.726 | -0.84 |
| 1442943_at   | Usp20         | Ubiquitin specific peptidase 20                                                | 1.01  | 0.994 | -1.43 | 0.586 | -1.46 | 0.414 | -1.13 | 0.751 | -0.75 |
| 1416489_at   | Pi4k2b        | phosphatidylinositol 4-kinase type 2 beta                                      | -1.26 | 0.25  | -1.15 | 0.4   | -1.38 | 0.044 | 3.81  | 0.179 | 0     |
| 1428486_at   | 1700123L14Rik | RIKEN cDNA 1700123L14 gene                                                     | -1.05 | 0.927 | 1.02  | 0.978 | -2.38 | 0.024 | -2.16 | 0.173 | -1.14 |
| 1451447_at   | Cuedc1        | CUE domain containing 1                                                        | -1.66 | 0.077 | -1.49 | 0.36  | 1.11  | 0.617 | -1.68 | 0.195 | -0.93 |
| 1441104_at   | Myo5b         | myosin Vb                                                                      | 1.12  | 0.783 | -1.31 | 0.652 | -2    | 0.171 | -1.04 | 0.914 | -0.81 |
| 1427573_at   | Chic1         | cysteine-rich hydrophobic domain 1                                             | -1.24 | 0.212 | -1.41 | 0.272 | -1.15 | 0.341 | 1.17  | 0.257 | -0.66 |
| 1427620_at   | Parc          | p53-associated parkin-like cytoplasmic protein                                 | -1.56 | 0.058 | -1.77 | 0.052 | 1.18  | 0.087 | -1.47 | 0.326 | -0.9  |
| 1443066_at   | ---           | ---                                                                            | -1.79 | 0.059 | -1.17 | 0.394 | -1.03 | 0.955 | 1.38  | 0.5   | -0.65 |
| 1459339_at   | 1700049G17Rik | RIKEN cDNA 1700049G17 gene                                                     | -1.24 | 0.376 | -1.41 | 0.092 | -1.14 | 0.529 | 1.05  | 0.671 | -0.69 |
| 1451502_at   | Pla2g10       | phospholipase A2, group X                                                      | -2.69 | 0.208 | -1.07 | 0.69  | 1.08  | 0.839 | -1.03 | 0.923 | -0.93 |
| 1443811_at   | Prkg1         | Protein kinase, cGMP-dependent, type I                                         | -1.27 | 0.713 | -1.03 | 0.938 | -1.58 | 0.122 | 1.21  | 0.764 | -0.67 |
| 1452530_a_at | Runx1         | runt related transcription factor 1                                            | -1.58 | 0.215 | -1.07 | 0.919 | -1.21 | 0.575 | 1.25  | 0.738 | -0.65 |
| 1433319_at   | 5430437A18Rik | RIKEN cDNA 5430437A18 gene                                                     | -1.9  | 0.473 | -1.04 | 0.962 | -1.11 | 0.849 | 1.48  | 0.395 | -0.64 |
| 1447675_x_at | Myod1         | myogenic differentiation 1                                                     | 1.09  | 0.898 | -1.3  | 0.664 | -1.87 | 0.08  | -2.22 | 0.288 | -1.08 |
| 1427151_at   | Qser1         | glutamine and serine rich 1                                                    | -1.28 | 0.301 | -1.18 | 0.505 | -1.31 | 0.11  | 1.05  | 0.582 | -0.68 |
| 1423343_at   | Slco1c1       | solute carrier organic anion transporter family, member 1c1                    | -1.86 | 0.23  | -2.27 | 0.285 | 1.41  | 0.338 | -1.22 | 0.617 | -0.98 |
| 1425685_at   | 2310005E10Rik | RIKEN cDNA 2310005E10 gene                                                     | 1.07  | 0.452 | -1.8  | 0.383 | -1.31 | 0.482 | -1.05 | 0.91  | -0.77 |
| 1453926_at   | Rad54l        | RAD54 like (S. cerevisiae)                                                     | -1.05 | 0.846 | -1.35 | 0.631 | -1.43 | 0.61  | 2.3   | 0.321 | -0.38 |
| 1415917_at   | Mthfd1        | methylenetetrahydrofolate dehydrogenase (NADP+ dependent), methenyltetrahy     | -1.2  | 0.077 | -1.12 | 0.476 | -1.5  | 0.043 | 2.19  | 0.174 | -0.41 |
| 1440824_at   | Fbxo45        | F-box protein 45                                                               | 1.27  | 0.68  | -2.37 | 0.108 | -1.44 | 0.263 | -1.11 | 0.289 | -0.91 |
| 1457461_at   | A630039O03Rik | RIKEN cDNA A630039O03 gene                                                     | 1.38  | 0.17  | -2.06 | 0.15  | -1.91 | 0.328 | -1.08 | 0.509 | -0.92 |
| 1427550_at   | Peg10         | paternally expressed 10                                                        | -1.15 | 0.848 | -1.16 | 0.713 | -1.51 | 0.057 | 1.19  | 0.767 | -0.66 |
| 1459727_at   | AW125646      | expressed sequence AW125646                                                    | -1.93 | 0.472 | 1.19  | 0.747 | -1.46 | 0.511 | -1.32 | 0.228 | -0.88 |
| 1416670_at   | Setdb1        | SET domain, bifurcated 1                                                       | -1.11 | 0.618 | -1.65 | 0.445 | -1.13 | 0.833 | 1.18  | 0.816 | -0.68 |
| 1426155_a_at | Osr2          | odd-skipped related 2 (Drosophila)                                             | -1.32 | 0.498 | -1.11 | 0.136 | -1.36 | 0.629 | 1.24  | 0.77  | -0.64 |

|              |               |                                                              |       |       |       |       |       |       |       |       |       |
|--------------|---------------|--------------------------------------------------------------|-------|-------|-------|-------|-------|-------|-------|-------|-------|
| 1446684_at   | Garnl1        | GTPase activating RANGAP domain-like 1                       | 1.18  | 0.462 | -1.42 | 0.506 | -1.95 | 0.037 | -1.5  | 0.241 | -0.92 |
| 1458697_at   | ---           | Transcribed locus                                            | -1.03 | 0.942 | -2.06 | 0.393 | -1.07 | 0.477 | 1.28  | 0.667 | -0.72 |
| 1440785_at   | Rxfp1         | relaxin/insulin-like family peptide receptor 1               | -1.46 | 0.018 | 1.05  | 0.884 | -1.51 | 0.151 | -1.41 | 0.606 | -0.84 |
| 1442805_at   | A130086G11Rik | RIKEN cDNA A130086G11 gene                                   | -1.24 | 0.106 | -1.55 | 0.304 | -1.07 | 0.706 | 1.28  | 0.421 | -0.64 |
| 1431964_at   | 4921518J05Rik | RIKEN cDNA 4921518J05 gene                                   | -1.05 | 0.95  | -1.4  | 0.339 | -1.37 | 0.469 | 1.21  | 0.606 | -0.66 |
| 1442041_at   | LOC552876     | hypothetical LOC552876                                       | 1.1   | 0.735 | -1.25 | 0.547 | -2.04 | 0.037 | -1.79 | 0.197 | -0.99 |
| 1444781_at   | Xab1          | XPA binding protein 1                                        | 1.35  | 0.41  | -1.95 | 0.055 | -1.91 | 0.174 | -1.51 | 0.469 | -1    |
| 1459997_s_at | Tmem17        | transmembrane protein 17                                     | 1.18  | 0.376 | -2.09 | 0.442 | -1.37 | 0.149 | -1.49 | 0.475 | -0.94 |
| 1434097_at   | ---           | Transcribed locus                                            | -1.18 | 0.333 | -1.44 | 0.036 | -1.18 | 0.038 | 1.04  | 0.806 | -0.69 |
| 1436057_at   | Gtl2          | GTL2, imprinted maternally expressed untranslated mRNA       | -1.05 | 0.92  | -1.62 | 0.454 | -1.22 | 0.546 | 1.07  | 0.829 | -0.71 |
| 1460050_x_at | 5630401D24Rik | RIKEN cDNA 5630401D24 gene                                   | -1.23 | 0.71  | -1.38 | 0.152 | -1.17 | 0.389 | 1.12  | 0.283 | -0.66 |
| 1455754_at   | Lmo3          | LIM domain only 3                                            | -1.17 | 0.631 | -1.33 | 0.383 | -1.28 | 0.609 | 1.06  | 0.833 | -0.68 |
| 1459556_at   | BC013481      | CDNA sequence BC013481                                       | 1.22  | 0.356 | -1.55 | 0.25  | -1.89 | 0.002 | -1.22 | 0.714 | -0.86 |
| 1454304_at   | Epn2          | epsin 2                                                      | -1.26 | 0.445 | -1.05 | 0.922 | -1.56 | 0.092 | 1.43  | 0.523 | -0.61 |
| 1444926_at   | ---           | ---                                                          | -1.72 | 0.133 | 1.1   | 0.902 | -1.41 | 0.628 | -1.64 | 0.171 | -0.92 |
| 1435731_x_at | Stag1         | Stromal antigen 1                                            | -1.64 | 0.082 | -1.14 | 0.046 | -1.1  | 0.29  | 1.42  | 0.096 | -0.62 |
| 1456753_at   | ---           | ---                                                          | -1.19 | 0.223 | -1.16 | 0.547 | -1.44 | 0.03  | 1.99  | 0.166 | -0.45 |
| 1432503_a_at | Pdcl2         | phosducin-like 2                                             | -2.38 | 0.1   | -1.22 | 0.781 | 1.15  | 0.78  | -1.23 | 0.746 | -0.92 |
| 1445036_at   | D11Ert518e    | DNA segment, Chr 11, ERATO Doi 518, expressed                | -1.01 | 0.971 | -1.67 | 0.295 | -1.24 | 0.758 | 1.74  | 0.448 | -0.55 |
| 1441372_at   | 5930405F01Rik | RIKEN cDNA 5930405F01 gene                                   | 1     | 0.989 | -1.21 | 0.642 | -1.78 | 0.166 | -1.68 | 0.26  | -0.92 |
| 1429942_at   | Gmeb1         | glucocorticoid modulatory element binding protein 1          | -1.35 | 0.2   | -1.26 | 0.256 | -1.17 | 0.411 | 1.15  | 0.424 | -0.66 |
| 1419126_at   | Hoxd9         | homeo box D9                                                 | -1.1  | 0.07  | -1.53 | 0.358 | -1.21 | 0.802 | 2.25  | 0.205 | -0.4  |
| 1417933_at   | Igfbp6        | insulin-like growth factor binding protein 6                 | -1.4  | 0.335 | -1.26 | 0.451 | -1.13 | 0.636 | 2.05  | 0.086 | -0.43 |
| 1446937_at   | Falz          | fetal Alzheimer antigen                                      | -1.59 | 0.117 | -1.05 | 0.9   | -1.23 | 0.054 | 1.01  | 0.96  | -0.72 |
| 1420007_at   | ---           | ---                                                          | -1.14 | 0.741 | -1.49 | 0.02  | -1.18 | 0.559 | 1.45  | 0.189 | -0.59 |
| 1451270_at   | Dusp18        | dual specificity phosphatase 18                              | -1.24 | 0.634 | -1.83 | 0.173 | 1.04  | 0.826 | -2.98 | 0.062 | -1.25 |
| 1445982_at   | Gpc6          | Glypican 6                                                   | 1.25  | 0.765 | -1.41 | 0.113 | -2.29 | 0.262 | -2.82 | 0.257 | -1.32 |
| 1449597_at   | LOC236874     | similar to odorant binding protein 1a                        | -1.07 | 0.86  | -1.23 | 0.788 | -1.55 | 0.588 | 2.99  | 0.194 | -0.21 |
| 1443401_at   | Astn2         | Astrotactin 2                                                | -2.27 | 0.272 | -1.09 | 0.855 | 1.04  | 0.883 | -1.04 | 0.949 | -0.84 |
| 1417713_at   | Eif2s2        | eukaryotic translation initiation factor 2, subunit 2 (beta) | -1.11 | 0.32  | -1.23 | 0.022 | -1.47 | 0.073 | 1.18  | 0.416 | -0.66 |
| 1444478_at   | 2900057D21Rik | RIKEN cDNA 2900057D21 gene                                   | -1.55 | 0.161 | -1.48 | 0.129 | 1.07  | 0.743 | -1.55 | 0.072 | -0.88 |
| 1426335_at   | Kcnq2         | potassium voltage-gated channel, subfamily Q, member 2       | -1.27 | 0.443 | -2.07 | 0.32  | 1.13  | 0.497 | -1.74 | 0.376 | -0.99 |
| 1422161_at   | Siglec1       | sialic acid binding Ig-like lectin 1, sialoadhesin           | -1.66 | 0.517 | 1.06  | 0.859 | -1.37 | 0.353 | -1.73 | 0.332 | -0.92 |
| 1437430_at   | Slc45a2       | solute carrier family 45, member 2                           | -1.2  | 0.673 | 1.12  | 0.754 | -2.28 | 0.012 | -1.82 | 0.607 | -1.04 |
| 1427726_at   | LOC633417     | similar to histocompatibility 2, T region locus 3            | -1.28 | 0.645 | -1.52 | 0.34  | -1.05 | 0.903 | 1.01  | 0.973 | -0.71 |
| 1435336_at   | Celsr2        | cadherin EGF LAG seven-pass G-type receptor 2                | -1.17 | 0.051 | -2.29 | 0.127 | 1.1   | 0.602 | -1.1  | 0.596 | -0.86 |
| 1455328_at   | Accn2         | amiloride-sensitive cation channel 2, neuronal               | -2.68 | 0.208 | -1.97 | 0.071 | 1.51  | 0.025 | -1.31 | 0.437 | -1.11 |
| 1422195_s_at | Tbx15         | T-box 15                                                     | 1.31  | 0.422 | -2.33 | 0.37  | -1.52 | 0.482 | -1.11 | 0.826 | -0.91 |
| 1453098_at   | Gria2         | glutamate receptor, ionotropic, AMPA2 (alpha 2)              | -1.84 | 0.078 | -1.08 | 0.817 | -1.08 | 0.804 | 1.16  | 0.303 | -0.71 |
| 1443026_at   | Grip1         | Glutamate receptor interacting protein 1                     | -1.16 | 0.559 | -1.24 | 0.754 | -1.38 | 0.011 | 1.07  | 0.903 | -0.68 |
| 1439549_at   | Prrg3         | proline rich Gla (G-carboxyglutamic acid) 3 (transmembrane)  | -1.07 | 0.681 | -1.24 | 0.394 | -1.53 | 0.058 | 1.18  | 0.12  | -0.67 |
| 1439762_x_at | Adra2c        | adrenergic receptor, alpha 2c                                | -1.89 | 0.294 | -1.33 | 0.549 | 1.12  | 0.875 | -2.7  | 0.321 | -1.2  |
| 1449786_at   | Zdhhc7        | zinc finger, DHHC domain containing 7                        | 1.19  | 0.813 | -1.94 | 0.277 | -1.44 | 0.253 | -1.5  | 0.254 | -0.92 |
| 1450274_at   | 1700108E19Rik | RIKEN cDNA 1700108E19 gene                                   | -2.49 | 0.057 | -1.25 | 0.77  | 1.19  | 0.694 | -1.69 | 0.422 | -1.06 |
| 1429930_at   | Ccdc19        | coiled-coil domain containing 19                             | -1.45 | 0.203 | -1.26 | 0.371 | -1.1  | 0.57  | 1.18  | 0.642 | -0.66 |
| 1418657_at   | Znhit4        | zinc finger, HIT type 4                                      | -1.6  | 0.201 | -1.35 | 0.384 | 1.03  | 0.883 | -1.77 | 0.103 | -0.92 |
| 1441953_at   | Stox2         | Storkhead box 2                                              | -1.41 | 0.137 | -1.1  | 0.769 | -1.28 | 0.355 | 1.42  | 0.329 | -0.59 |
| 1420795_at   | Fgf9          | fibroblast growth factor 9                                   | -1.37 | 0.264 | -1.1  | 0.679 | -1.32 | 0.238 | 1.22  | 0.379 | -0.64 |
| 1420931_at   | Mapk8         | mitogen activated protein kinase 8                           | -2.5  | 0.064 | -1.41 | 0.427 | 1.29  | 0.498 | -1.82 | 0.011 | -1.11 |
| 1456685_at   | Nsg2          | neuron specific gene family member 2                         | -1.56 | 0.474 | -1.59 | 0.305 | 1.13  | 0.853 | -1.95 | 0.194 | -0.99 |
| 1441702_at   | Rfx3          | Regulatory factor X, 3 (influences HLA class II expression)  | -2.11 | 0.25  | -1.61 | 0.397 | 1.3   | 0.153 | -1.34 | 0.084 | -0.94 |
| 1457233_at   | Dnaj2         | DnaJ (Hsp40) homolog, subfamily A, member 2                  | 1.1   | 0.485 | -1.46 | 0.229 | -1.64 | 0.028 | -1.66 | 0.174 | -0.91 |
| 1457630_at   | Whsc111       | Wolf-Hirschhorn syndrome candidate 1-like 1 (human)          | -2.31 | 0.339 | -1.45 | 0.54  | 1.27  | 0.728 | -2.73 | 0.207 | -1.3  |

|              |               |                                                                   |       |       |       |       |       |       |       |       |       |
|--------------|---------------|-------------------------------------------------------------------|-------|-------|-------|-------|-------|-------|-------|-------|-------|
| 1435667_at   | Rims1         | regulating synaptic membrane exocytosis 1                         | -1.51 | 0.187 | -1.49 | 0.373 | 1.06  | 0.881 | -3.41 | 0.018 | -1.34 |
| 1457469_at   | ---           | ---                                                               | -1.19 | 0.591 | -1.18 | 0.775 | -1.4  | 0.24  | 1.54  | 0.252 | -0.56 |
| 1430211_at   | 4930415O20Rik | RIKEN cDNA 4930415O20 gene                                        | -1.16 | 0.662 | -1.24 | 0.471 | -1.37 | 0.481 | 1.55  | 0.211 | -0.56 |
| 1454273_at   | 1700025H01Rik | RIKEN cDNA 1700025H01 gene                                        | 1.16  | 0.544 | -1.16 | 0.789 | -2.63 | 0.204 | -1.17 | 0.4   | -0.95 |
| 1422338_at   | Gpr63         | G protein-coupled receptor 63                                     | 1.05  | 0.862 | -1.06 | 0.826 | -2.48 | 0.06  | -1.73 | 0.537 | -1.05 |
| 1458858_at   | ---           | ---                                                               | -1.24 | 0.317 | -1.64 | 0.576 | -1.02 | 0.966 | 1.8   | 0.184 | -0.52 |
| 1423406_at   | Sv2a          | synaptic vesicle glycoprotein 2 a                                 | -1.5  | 0.109 | 1.09  | 0.859 | -1.56 | 0.315 | -1.29 | 0.62  | -0.81 |
| 1427502_at   | Adam4         | a disintegrin and metallopeptidase domain 4                       | -1.24 | 0.467 | -1.02 | 0.94  | -1.64 | 0.137 | 1.64  | 0.175 | -0.56 |
| 1459930_at   | Ube2h         | Ubiquitin-conjugating enzyme E2H                                  | -1.32 | 0.575 | -1.23 | 0.79  | -1.21 | 0.587 | 1.3   | 0.176 | -0.62 |
| 1429044_at   | Camsap11l     | calmodulin regulated spectrin-associated protein 1-like 1         | -1.06 | 0.483 | -1.18 | 0.269 | -1.64 | 0.006 | 2.01  | 0.135 | -0.47 |
| 1435390_at   | Exod1         | exonuclease domain containing 1                                   | -1.39 | 0.271 | -1.21 | 0.248 | -1.18 | 0.451 | 1.64  | 0.194 | -0.53 |
| 1446206_at   | B230209C24Rik | RIKEN cDNA B230209C24 gene                                        | -2.35 | 0.525 | 1.44  | 0.396 | -1.88 | 0.296 | -1.42 | 0.361 | -1.05 |
| 1433944_at   | Hectd2        | HECT domain containing 2                                          | 1.02  | 0.956 | -2.03 | 0.078 | -1.14 | 0.681 | -1.4  | 0.396 | -0.89 |
| 1456689_at   | Rnf10         | Ring finger protein 10                                            | -1.03 | 0.941 | -1.64 | 0.009 | -1.22 | 0.414 | 2.12  | 0.17  | -0.44 |
| 1447511_at   | ---           | Transcribed locus                                                 | 1.36  | 0.052 | -1.71 | 0.362 | -2.22 | 0.135 | -4.4  | 0.024 | -1.74 |
| 1418968_at   | Rb1cc1        | RB1-inducible coiled-coil 1                                       | -1.11 | 0.507 | -1.18 | 0.138 | -1.54 | 0.074 | 1.11  | 0.629 | -0.68 |
| 1429401_at   | Stox2         | storkhead box 2                                                   | -1.32 | 0.245 | -1.13 | 0.532 | -1.32 | 0.013 | 1.25  | 0.442 | -0.63 |
| 1445940_at   | D4Ert298e     | DNA segment, Chr 4, ERATO Doi 298, expressed                      | -1.3  | 0.328 | -1.24 | 0.421 | -1.22 | 0.614 | 1.22  | 0.336 | -0.63 |
| 1438255_at   | Ches1         | checkpoint suppressor 1                                           | 1.03  | 0.206 | -1.43 | 0.026 | -1.5  | 0.061 | -1.34 | 0.536 | -0.81 |
| 1450685_at   | Arpp19        | cAMP-regulated phosphoprotein 19                                  | -1.21 | 0.072 | -1.15 | 0.038 | -1.43 | 0.026 | 1.08  | 0.595 | -0.68 |
| 1416744_at   | Uap1          | UDP-N-acetylglucosamine pyrophosphorylase 1                       | -1.53 | 0.341 | -1.29 | 0.351 | -1.03 | 0.934 | 1.3   | 0.386 | -0.64 |
| 1449760_at   | ---           | Transcribed locus                                                 | -1.47 | 0.175 | -1.01 | 0.912 | -1.37 | 0.184 | 1.4   | 0.253 | -0.61 |
| 1458256_at   | 5830446M03Rik | RIKEN cDNA 5830446M03 gene                                        | -1.82 | 0.102 | 1.02  | 0.961 | -1.2  | 0.352 | -1.2  | 0.498 | -0.8  |
| 1427249_x_at | Mup3          | major urinary protein 3                                           | 1.68  | 0.235 | -4.66 | 0.007 | -1.97 | 0.129 | -1.05 | 0.743 | -1.5  |
| 1445306_at   | Cugbp2        | CUG triplet repeat, RNA binding protein 2                         | 1.1   | 0.887 | -2.11 | 0.056 | -1.21 | 0.326 | -2.13 | 0.081 | -1.09 |
| 1430033_at   | 5330431K02Rik | RIKEN cDNA 5330431K02 gene                                        | 1.2   | 0.287 | -2.05 | 0.07  | -1.41 | 0.089 | -1.54 | 0.162 | -0.95 |
| 1427883_a_at | Col3a1        | procollagen, type III, alpha 1                                    | -1.13 | 0.218 | 1.13  | 0.29  | -2.57 | 0.055 | -1.07 | 0.792 | -0.91 |
| 1453437_at   | 2810407D09Rik | RIKEN cDNA 2810407D09 gene                                        | -1.31 | 0.34  | -1.13 | 0.467 | -1.33 | 0.078 | 1.15  | 0.439 | -0.65 |
| 1420063_at   | ---           | Transcribed locus                                                 | -1.96 | 0.535 | -2.06 | 0.122 | 1.41  | 0.566 | -1.41 | 0.512 | -1.01 |
| 1422696_at   | Ttyh1         | tweet homolog 1 (Drosophila)                                      | -1.32 | 0.695 | -1.1  | 0.885 | -1.37 | 0.558 | 1.13  | 0.783 | -0.66 |
| 1446440_at   | ---           | CDNA clone IMAGE:40051559                                         | 1.08  | 0.362 | -1.15 | 0.8   | -2.23 | 0.007 | -1.29 | 0.454 | -0.9  |
| 1452529_a_at | Creb1         | cAMP responsive element binding protein 1                         | -1.42 | 0.452 | -1.45 | 0.235 | 1.01  | 0.982 | -1.08 | 0.627 | -0.74 |
| 1427963_s_at | Rdh9          | retinol dehydrogenase 9                                           | -1    | 0.83  | -2.12 | 0.001 | -1.07 | 0.621 | 1.1   | 0.769 | -0.77 |
| 1451867_x_at | Arhgap6       | Rho GTPase activating protein 6                                   | -1.42 | 0.015 | -1.2  | 0.387 | -1.15 | 0.383 | 1.02  | 0.909 | -0.69 |
| 1442402_at   | Sh3rf1        | SH3 domain containing ring finger 1                               | 1.15  | 0.7   | -1.36 | 0.094 | -1.94 | 0.021 | -1.13 | 0.407 | -0.82 |
| 1458873_at   | Aspm          | asp (abnormal spindle)-like, microcephaly associated (Drosophila) | -1.47 | 0.145 | -1.25 | 0.462 | -1.09 | 0.749 | 1.17  | 0.36  | -0.66 |
| 1443109_at   | 5830417C01Rik | RIKEN cDNA 5830417C01 gene                                        | -1.4  | 0.255 | 1.01  | 0.977 | -1.46 | 0.017 | -1.93 | 0.144 | -0.95 |
| 1452808_at   | Snupn         | snurportin 1                                                      | -1.33 | 0.225 | -1.36 | 0.477 | -1.09 | 0.438 | 1.01  | 0.964 | -0.69 |
| 1457281_at   | 4930461P20Rik | RIKEN cDNA 4930461P20 gene                                        | -1.07 | 0.821 | -1.38 | 0.117 | -1.35 | 0.47  | 1.47  | 0.215 | -0.58 |
| 1437382_at   | Acvr2a        | Activin receptor IIA                                              | -1.03 | 0.455 | -1.04 | 0.694 | -2.11 | 0.014 | 1.08  | 0.778 | -0.78 |
| 1444446_at   | ---           | ---                                                               | 1     | 0.99  | -1.16 | 0.62  | -1.86 | 0.033 | -1.1  | 0.727 | -0.78 |
| 1436161_at   | Aprin         | androgen-induced proliferation inhibitor                          | -1.09 | 0.372 | -1.22 | 0.136 | -1.5  | 0.087 | 1.06  | 0.562 | -0.69 |
| 1438081_at   | Mcc           | mutated in colorectal cancers                                     | -1.32 | 0.37  | -1.19 | 0.359 | -1.25 | 0.46  | 1.93  | 0.057 | -0.45 |
| 1420735_at   | Gabrr2        | gamma-aminobutyric acid (GABA-C) receptor, subunit rho 2          | -1.12 | 0.816 | -1.04 | 0.928 | -1.83 | 0.309 | 1.08  | 0.866 | -0.73 |
| 1427371_at   | Abca8a        | ATP-binding cassette, sub-family A (ABC1), member 8a              | 1.24  | 0.42  | -2.17 | 0.016 | -1.43 | 0.225 | -1.14 | 0.709 | -0.87 |
| 1439880_at   | D630023F18Rik | RIKEN cDNA D630023F18 gene                                        | -1.61 | 0.098 | -1.05 | 0.896 | -1.21 | 0.617 | 1.28  | 0.329 | -0.65 |
| 1439844_at   | 8430426J06Rik | RIKEN cDNA 8430426J06 gene                                        | -1.37 | 0.387 | -1.05 | 0.845 | -1.39 | 0.156 | 1.06  | 0.896 | -0.69 |
| 1446390_at   | Elk1          | ELK1, member of ETS oncogene family                               | -1.04 | 0.864 | -1.85 | 0.402 | -1.11 | 0.478 | 1.31  | 0.679 | -0.67 |
| 1451913_a_at | Hyou1         | hypoxia up-regulated 1                                            | -1.63 | 0.386 | -1.63 | 0.351 | 1.18  | 0.632 | -1.39 | 0.224 | -0.87 |
| 1434627_at   | Nrf1          | Nuclear respiratory factor 1                                      | -1.26 | 0.248 | -1.04 | 0.478 | -1.55 | 0.037 | 1.02  | 0.801 | -0.71 |
| 1431424_at   | 2810055G20Rik | RIKEN cDNA 2810055G20 gene                                        | 1.17  | 0.384 | -1.46 | 0.023 | -1.84 | 0.005 | -1.37 | 0.227 | -0.87 |
| 1446758_at   | Bre           | brain and reproductive organ-expressed protein                    | -1.22 | 0.524 | -1.09 | 0.617 | -1.5  | 0.221 | 1.02  | 0.926 | -0.7  |
| 1440448_at   | ---           | Transcribed locus                                                 | -1.05 | 0.732 | -1.12 | 0.739 | -1.79 | 0.062 | 1.11  | 0.491 | -0.71 |

|              |                   |                                                                                 |       |       |       |       |       |       |       |       |       |
|--------------|-------------------|---------------------------------------------------------------------------------|-------|-------|-------|-------|-------|-------|-------|-------|-------|
| 1432250_at   | Utp14a            | UTP14, U3 small nucleolar ribonucleoprotein, homolog A (yeast)                  | -1.16 | 0.7   | -1.51 | 0.223 | -1.14 | 0.398 | 1.04  | 0.563 | -0.69 |
| 1454581_at   | 5330425B07Rik     | RIKEN cDNA 5330425B07 gene                                                      | -1.11 | 0.72  | -1.05 | 0.917 | -1.81 | 0.079 | 1.35  | 0.078 | -0.66 |
| 1422610_s_at | Igf2bp3           | insulin-like growth factor 2 mRNA binding protein 3                             | -1.09 | 0.901 | -2.05 | 0.244 | 1     | 0.999 | -3.89 | 0.046 | -1.51 |
| 1440930_a_at | Scr2              | scratch homolog 2, zinc finger protein (Drosophila)                             | 1.3   | 0.71  | -1.64 | 0.194 | -2.03 | 0.209 | -2.42 | 0.288 | -1.2  |
| 1432396_at   | 3110018106Rik     | RIKEN cDNA 3110018106 gene                                                      | 1.32  | 0.63  | -2.18 | 0.011 | -1.61 | 0.096 | -1.09 | 0.653 | -0.89 |
| 1429517_at   | Zfyve20           | zinc finger, FYVE domain containing 20                                          | -1.76 | 0.17  | -2.17 | 0.101 | 1.38  | 0.494 | -1.45 | 0.386 | -1    |
| 1437015_x_at | Pla2g1b           | phospholipase A2, group IB, pancreas                                            | -1.15 | 0.835 | 1.12  | 0.873 | -2.39 | 0.011 | -1.93 | 0.395 | -1.09 |
| 1456842_at   | ---               | PREDICTED: Mus musculus hypothetical protein LOC628013 (LOC628013), mR          | 1.1   | 0.846 | -2.2  | 0.207 | -1.17 | 0.788 | -2.15 | 0.453 | -1.11 |
| 1432556_a_at | 3100002J23Rik     | RIKEN cDNA 3100002J23 gene                                                      | -1.06 | 0.905 | -2.26 | 0.355 | 1.02  | 0.942 | -1.64 | 0.612 | -0.99 |
| 1431173_at   | A930008G19Rik     | RIKEN cDNA A930008G19 gene                                                      | -1.28 | 0.31  | -1.05 | 0.808 | -1.49 | 0.08  | 1.42  | 0.342 | -0.6  |
| 1454854_at   | Ostb              | organic solute transporter beta                                                 | 1.01  | 0.9   | -1.45 | 0.418 | -1.42 | 0.373 | -1.6  | 0.208 | -0.86 |
| 1420929_at   | Ctnn1             | catenin (cadherin associated protein), alpha-like 1                             | 1.04  | 0.875 | -1.83 | 0.016 | -1.22 | 0.371 | -1.34 | 0.409 | -0.84 |
| 1446352_at   | 2410016O06Rik     | RIKEN cDNA 2410016O06 gene                                                      | -1.72 | 0.511 | -1.08 | 0.895 | -1.11 | 0.76  | 2.59  | 0.113 | -0.33 |
| 1447515_at   | ---               | Transcribed locus                                                               | 1.23  | 0.688 | -1.6  | 0.092 | -1.82 | 0.16  | -1.11 | 0.711 | -0.82 |
| 1437605_at   | Nphs2             | nephrosis 2 homolog, podocin (human)                                            | 1.31  | 0.291 | -1.81 | 0.145 | -1.85 | 0.022 | -2.37 | 0.096 | -1.18 |
| 1442471_at   | Ephb2             | Eph receptor B2                                                                 | -1.33 | 0.048 | -1.27 | 0.414 | -1.16 | 0.521 | 1.08  | 0.415 | -0.67 |
| 1425421_at   | Rbbp6             | Retinoblastoma binding protein 6                                                | 1.05  | 0.659 | -1.23 | 0.207 | -1.86 | 0.02  | -1.36 | 0.214 | -0.85 |
| 1442914_at   | ---               | Transcribed locus, weakly similar to XP_858458.1 PREDICTED: hypothetical pro    | -1.24 | 0.151 | 1.06  | 0.838 | -1.87 | 0.277 | -2.47 | 0.036 | -1.13 |
| 1453136_at   | Fbxo30            | F-box protein 30                                                                | -1.37 | 0.18  | -1.14 | 0.592 | -1.25 | 0.184 | 4.86  | 0.189 | 0.27  |
| 1447490_at   | ---               | Transcribed locus                                                               | -1.27 | 0.775 | -1.08 | 0.749 | -1.44 | 0.512 | 1.3   | 0.616 | -0.62 |
| 1431882_at   | Als2cr12          | amyotrophic lateral sclerosis 2 (juvenile) chromosome region, candidate 12 (hum | -3.29 | 0.053 | -1.49 | 0.016 | 1.43  | 0.29  | -1.45 | 0.188 | -1.2  |
| 1421635_at   | Cnnm4             | cyclin M4                                                                       | -1.85 | 0.443 | 1.1   | 0.72  | -1.3  | 0.591 | -1.34 | 0.707 | -0.85 |
| 1435370_a_at | Ces3              | carboxylesterase 3                                                              | -1.35 | 0.391 | -1.26 | 0.393 | -1.15 | 0.008 | 4.84  | 0.057 | 0.27  |
| 1440454_at   | A530088I07Rik     | RIKEN cDNA A530088I07 gene                                                      | -1.43 | 0.238 | -1.13 | 0.433 | -1.21 | 0.542 | 1.11  | 0.672 | -0.67 |
| 1441270_at   | Akap2             | A kinase (PRKA) anchor protein 2                                                | 1.24  | 0.746 | -4.55 | 0.088 | -1.06 | 0.837 | -1.27 | 0.105 | -1.41 |
| 1421472_at   | 2900083I11Rik     | RIKEN cDNA 2900083I11 gene                                                      | -1.47 | 0.079 | -1.43 | 0.588 | 1.03  | 0.763 | -1.02 | 0.901 | -0.72 |
| 1453280_at   | Mageb5 /// LOC625 | melanoma antigen, family B, 5 /// similar to Melanoma-associated antigen B3 (MA | -1.15 | 0.872 | -1.01 | 0.989 | -1.85 | 0.385 | 1.03  | 0.855 | -0.74 |
| 1452836_at   | Lpin2             | lipin 2                                                                         | -1.19 | 0.279 | -1.3  | 0.439 | -1.25 | 0.392 | 1.84  | 0.147 | -0.48 |
| 1440904_at   | Senp5             | SUMO/sentrin specific peptidase 5                                               | -1.29 | 0.282 | -2.22 | 0.029 | 1.18  | 0.397 | -1.28 | 0.149 | -0.9  |
| 1433205_at   | 2810436B12Rik     | RIKEN cDNA 2810436B12 gene                                                      | 1.3   | 0.432 | -1.79 | 0.309 | -1.81 | 0.091 | -1.63 | 0.287 | -0.99 |
| 1436577_at   | Arhgef9           | Cdc42 guanine nucleotide exchange factor (GEF) 9                                | 1.13  | 0.839 | -2.06 | 0.091 | -1.27 | 0.479 | -1.33 | 0.593 | -0.88 |
| 1442532_at   | ---               | ---                                                                             | -1.29 | 0.385 | 1.04  | 0.896 | -1.68 | 0.068 | -1.54 | 0.004 | -0.87 |
| 1427641_at   | Dlx4              | Distal-less homeobox 4                                                          | -1.32 | 0.741 | -2.48 | 0.078 | 1.25  | 0.498 | -2.28 | 0.012 | -1.21 |
| 1432640_at   | 4633401L03Rik     | RIKEN cDNA 4633401L03 gene                                                      | 1.22  | 0.065 | -1.31 | 0.686 | -2.37 | 0.115 | -1.34 | 0.551 | -0.95 |
| 1439472_at   | Gcn1l1            | GCN1 general control of amino-acid synthesis 1-like 1 (yeast)                   | -2.21 | 0.186 | -1.06 | 0.912 | 1.01  | 0.979 | -3.08 | 0     | -1.33 |
| 1440979_at   | Igf2r             | Insulin-like growth factor 2 receptor                                           | 1.18  | 0.245 | -1.74 | 0.247 | -1.53 | 0.056 | -1.89 | 0.183 | -0.99 |
| 1435891_x_at | 2610021A01Rik /// | RIKEN cDNA 2610021A01 gene /// similar to zinc finger protein 347               | -1.24 | 0.426 | -1.14 | 0.541 | -1.38 | 0.121 | 1.11  | 0.583 | -0.66 |
| 1441680_at   | Rbms3             | RNA binding motif, single stranded interacting protein                          | -1.5  | 0.167 | 1.26  | 0.496 | -2.08 | 0.015 | -1.64 | 0.204 | -0.99 |
| 1456705_at   | Zfp532            | Zinc finger protein 532                                                         | -2.07 | 0.015 | 1.23  | 0.579 | -1.44 | 0.137 | -1.15 | 0.651 | -0.86 |
| 1440037_at   | Pbx1              | pre B-cell leukemia transcription factor 1                                      | -1.12 | 0.744 | 1.03  | 0.841 | -2.07 | 0.005 | -1.12 | 0.671 | -0.82 |
| 1420458_at   | Tac4              | tachykinin 4                                                                    | -1.53 | 0.322 | -1.04 | 0.84  | -1.26 | 0.591 | 1.08  | 0.823 | -0.69 |
| 1424949_at   | Huwe1             | HECT, UBA and WWE domain containing 1                                           | -1.12 | 0.209 | -1.25 | 0.02  | -1.4  | 0.054 | 1     | 1     | -0.69 |
| 1458711_at   | ---               | ---                                                                             | -1.2  | 0.793 | -1.54 | 0.405 | -1.08 | 0.907 | 1.57  | 0.042 | -0.56 |
| 1451144_at   | Bxdc2             | brix domain containing 2                                                        | -1.22 | 0.107 | -1.33 | 0.038 | -1.2  | 0.013 | 1.05  | 0.714 | -0.67 |
| 1419929_at   | D15Ert55e         | DNA segment, Chr 15, ERATO Doi 55, expressed                                    | -1.66 | 0.454 | 1.21  | 0.393 | -1.68 | 0.045 | -1.03 | 0.96  | -0.79 |
| 1445928_at   | 6-Mar             | membrane-associated ring finger (C3HC4) 6                                       | 1.11  | 0.794 | -1.36 | 0.367 | -1.76 | 0.072 | -1    | 0.996 | -0.75 |
| 1418445_at   | ---               | ---                                                                             | -1.21 | 0.357 | -1.31 | 0.095 | -1.23 | 0.385 | 1.32  | 0.4   | -0.6  |
| 1427118_at   | krt86             | keratin 86                                                                      | -2.06 | 0.264 | 1.01  | 0.984 | -1.09 | 0.874 | -3.31 | 0.101 | -1.36 |
| 1441021_at   | Letmd1            | LETM1 domain containing 1                                                       | -1.67 | 0.574 | -3.49 | 0.004 | 1.52  | 0.185 | -1.82 | 0.091 | -1.36 |
| 1442071_at   | Abce1             | ATP-binding cassette, sub-family E (OABP), member 1                             | -1.34 | 0.161 | -1.56 | 0.172 | 1.02  | 0.954 | -1.33 | 0.2   | -0.8  |
| 1437024_at   | Smpd4             | sphingomyelin phosphodiesterase 4                                               | -1.03 | 0.886 | -1.62 | 0.163 | -1.23 | 0.439 | 2.24  | 0.28  | -0.41 |
| 1441902_x_at | ---               | ---                                                                             | -1.74 | 0.013 | -1.32 | 0.355 | 1.08  | 0.738 | -1.24 | 0.13  | -0.81 |
| 1453409_at   | Cgrrf1            | cell growth regulator with ring finger domain 1                                 | -1.53 | 0.286 | -1.06 | 0.776 | -1.24 | 0.482 | 1.48  | 0.301 | -0.59 |

|              |               |                                                                               |       |       |       |       |       |       |       |       |       |
|--------------|---------------|-------------------------------------------------------------------------------|-------|-------|-------|-------|-------|-------|-------|-------|-------|
| 1450586_at   | Bdkrb1        | bradykinin receptor, beta 1                                                   | 1.03  | 0.93  | -1.32 | 0.3   | -1.61 | 0.064 | -1.23 | 0.515 | -0.78 |
| 1442396_at   | A730020M07Rik | RIKEN cDNA A730020M07 gene                                                    | -1.59 | 0.017 | -1.33 | 0.515 | 1.03  | 0.907 | -1.61 | 0.315 | -0.88 |
| 1459938_at   | C330024D21Rik | RIKEN cDNA C330024D21 gene                                                    | -3.03 | 0.007 | -1.42 | 0.479 | 1.38  | 0.155 | -1.55 | 0.458 | -1.16 |
| 1452096_s_at | D230025D16Rik | RIKEN cDNA D230025D16 gene                                                    | -1.08 | 0.372 | -1.49 | 0.033 | -1.23 | 0.187 | 1     | 0.993 | -0.7  |
| 1420024_s_at | Etf1          | eukaryotic translation termination factor 1                                   | -1.27 | 0.413 | -1.09 | 0.653 | -1.42 | 0.045 | 1.26  | 0.431 | -0.63 |
| 1439445_x_at | Acly          | ATP citrate lyase                                                             | -1.73 | 0.384 | 1.18  | 0.506 | -1.52 | 0.167 | -1.06 | 0.532 | -0.79 |
| 1454759_at   | Git1          | G protein-coupled receptor kinase-interactor 1                                | -1.22 | 0.139 | -1.87 | 0.094 | 1.05  | 0.671 | -1.18 | 0.69  | -0.8  |
| 1460654_at   | Slc30a3       | solute carrier family 30 (zinc transporter), member 3                         | -2.14 | 0.253 | 1.03  | 0.942 | -1.1  | 0.824 | -1.29 | 0.203 | -0.87 |
| 1427732_s_at | Abcg4         | ATP-binding cassette, sub-family G (WHITE), member 4                          | -1.49 | 0.35  | -1.08 | 0.899 | -1.23 | 0.469 | 3.84  | 0.225 | 0.01  |
| 1447218_at   | 1110003F02Rik | RIKEN cDNA 1110003F02 gene                                                    | -1.71 | 0.478 | -1.11 | 0.82  | -1.08 | 0.594 | 2.31  | 0.187 | -0.4  |
| 1434264_at   | Ank2          | ankyrin 2, brain                                                              | 1.04  | 0.906 | -1.56 | 0.197 | -1.38 | 0.445 | -1.53 | 0.419 | -0.86 |
| 1443313_at   | A530058N18Rik | RIKEN cDNA A530058N18 gene                                                    | -1.28 | 0.364 | -1.3  | 0.471 | -1.16 | 0.552 | 1.47  | 0.308 | -0.57 |
| 1428698_at   | 2310004I03Rik | RIKEN cDNA 2310004I03 gene                                                    | 1.04  | 0.76  | -1.19 | 0.379 | -1.88 | 0.001 | -1.08 | 0.75  | -0.78 |
| 1437141_x_at | Dym           | dymeclin                                                                      | -1.35 | 0.241 | -1.41 | 0.101 | -1.04 | 0.718 | 1.42  | 0.159 | -0.59 |
| 1443436_at   | Map2k2        | Mitogen activated protein kinase kinase 2                                     | -1.31 | 0.246 | -1.15 | 0.505 | -1.29 | 0.205 | 1.06  | 0.647 | -0.67 |
| 1453815_at   | Spbc25        | spindle pole body component 25 homolog (S. cerevisiae)                        | -1.51 | 0.153 | -1.15 | 0.583 | -1.14 | 0.648 | 3.23  | 0.149 | -0.14 |
| 1444597_at   | ---           | Transcribed locus                                                             | -1.52 | 0.293 | -1.49 | 0.341 | 1.08  | 0.865 | -1.47 | 0.594 | -0.85 |
| 1429838_at   | Spag16        | sperm associated antigen 16                                                   | 1.02  | 0.962 | -1.17 | 0.558 | -1.86 | 0.228 | -1.15 | 0.738 | -0.79 |
| 1434488_at   | Arfrp1        | ADP-ribosylation factor related protein 1                                     | -1.52 | 0.12  | -1.45 | 0.054 | 1.06  | 0.67  | -1.34 | 0.057 | -0.81 |
| 1427766_at   | Tcra-V8       | T-cell receptor alpha, variable 8                                             | -1.83 | 0.534 | 1.04  | 0.918 | -1.21 | 0.642 | -1.08 | 0.878 | -0.77 |
| 1425127_at   | Hsd3b2        | hydroxy-delta-5-steroid dehydrogenase, 3 beta- and steroid delta-isomerase 2  | -1.67 | 0.136 | -3.15 | 0.022 | 1.5   | 0.458 | -1.95 | 0.18  | -1.32 |
| 1425595_at   | Gabbr1        | gamma-aminobutyric acid (GABA-B) receptor, 1                                  | -1.33 | 0.631 | 1.03  | 0.944 | -1.6  | 0.274 | -1.16 | 0.725 | -0.76 |
| 1440740_at   | Ctdspl2       | CTD (carboxy-terminal domain, RNA polymerase II, polypeptide A) small phospho | 1.08  | 0.696 | -1.46 | 0.022 | -1.55 | 0.024 | -1.08 | 0.396 | -0.75 |
| 1431163_at   | 2700046G09Rik | RIKEN cDNA 2700046G09 gene                                                    | -1.22 | 0.109 | -1.06 | 0.58  | -1.54 | 0.171 | 1.02  | 0.922 | -0.7  |
| 1439963_x_at | 1700129I04Rik | RIKEN cDNA 1700129I04 gene                                                    | 1.17  | 0.635 | -2.76 | 0.14  | -1.14 | 0.85  | -1.55 | 0.585 | -1.07 |
| 1426060_at   | ---           | ---                                                                           | -1.71 | 0.404 | 1.02  | 0.901 | -1.24 | 0.276 | -1.62 | 0.155 | -0.89 |
| 1434916_at   | Vkorc11       | vitamin K epoxide reductase complex, subunit 1-like 1                         | -1.39 | 0.153 | -1.15 | 0.254 | -1.22 | 0.126 | 1.8   | 0.226 | -0.49 |
| 1441017_at   | Zcchc14       | zinc finger, CCHC domain containing 14                                        | 1     | 0.996 | -1.42 | 0.204 | -1.41 | 0.093 | -1.35 | 0.662 | -0.8  |
| 1453781_at   | ---           | ---                                                                           | -1.29 | 0.025 | -1.64 | 0.054 | 1.03  | 0.895 | -1.05 | 0.851 | -0.74 |
| 1418846_at   | Ap4m1         | adaptor-related protein complex AP-4, mu 1                                    | 1.01  | 0.975 | -1.81 | 0.111 | -1.18 | 0.433 | -1.16 | 0.243 | -0.78 |
| 1451869_at   | Abca3         | ATP-binding cassette, sub-family A (ABC1), member 3                           | -1.35 | 0.203 | -1.02 | 0.955 | -1.46 | 0.2   | 1.64  | 0.004 | -0.54 |
| 1420946_at   | Atrx          | alpha thalassemia/mental retardation syndrome X-linked homolog (human)        | -1.02 | 0.952 | -1.22 | 0.481 | -1.63 | 0.237 | 1.05  | 0.838 | -0.7  |
| 1429572_at   | Nsun7         | NOL1/NOP2/Sun domain family, member 7                                         | -2.05 | 0.411 | -1.18 | 0.571 | 1.08  | 0.884 | -1.59 | 0.498 | -0.94 |
| 1446975_at   | Cas21         | Castor homolog 1, zinc finger (Drosophila)                                    | -3.14 | 0.036 | -1.03 | 0.927 | 1.13  | 0.804 | -1.17 | 0.266 | -1.05 |
| 1427961_s_at | Ugt2b34       | UDP glucuronosyltransferase 2 family, polypeptide B34                         | -1.12 | 0.106 | -1.24 | 0.038 | -1.4  | 0.329 | 1.88  | 0.099 | -0.47 |
| 1458338_x_at | Nr2c1         | nuclear receptor subfamily 2, group C, member 1                               | -1.17 | 0.643 | -1.03 | 0.946 | -1.72 | 0.085 | 1.58  | 0.349 | -0.58 |
| 1433352_at   | C430049A07Rik | RIKEN cDNA C430049A07 gene                                                    | -2.52 | 0.007 | -1.34 | 0.599 | 1.27  | 0.374 | -1.4  | 0.286 | -1    |
| 1445932_at   | Celsr1        | Cadherin EGF LAG seven-pass G-type receptor 1                                 | 1.29  | 0.802 | -1.46 | 0.352 | -2.31 | 0.227 | -1.55 | 0.583 | -1.01 |
| 1432214_at   | 1700017D01Rik | RIKEN cDNA 1700017D01 gene                                                    | 1.12  | 0.903 | -2.56 | 0.202 | -1.1  | 0.879 | -1.09 | 0.796 | -0.91 |
| 1444616_x_at | ---           | Transcribed locus                                                             | -1.18 | 0.716 | -1.04 | 0.822 | -1.64 | 0.063 | 1.46  | 0.562 | -0.6  |
| 1433663_s_at | AU014645      | expressed sequence AU014645                                                   | -1.25 | 0.128 | -1.12 | 0.417 | -1.39 | 0.146 | 1.02  | 0.919 | -0.69 |
| 1423277_at   | Ptprk         | protein tyrosine phosphatase, receptor type, K                                | -1.15 | 0.027 | -1.37 | 0.081 | -1.23 | 0.213 | 1.18  | 0.421 | -0.64 |
| 1436460_at   | BC030440      | cDNA sequence BC030440                                                        | -1.54 | 0.227 | -1.15 | 0.665 | -1.12 | 0.057 | 2.18  | 0.169 | -0.41 |
| 1421494_at   | 1110033F04Rik | RIKEN cDNA 1110033F04 gene                                                    | -1.1  | 0.878 | -1.7  | 0.443 | -1.09 | 0.803 | 1.72  | 0.349 | -0.54 |
| 1427196_at   | Wnk4          | WNK lysine deficient protein kinase 4                                         | -1.02 | 0.938 | -1.91 | 0.018 | -1.1  | 0.086 | 2.09  | 0.101 | -0.48 |
| 1435912_at   | Ubx27         | UBX domain containing 7                                                       | -1.05 | 0.177 | -1.36 | 0.137 | -1.37 | 0     | 1.2   | 0.16  | -0.65 |
| 1445176_at   | ---           | ---                                                                           | -1.35 | 0.674 | -1.22 | 0.676 | -1.18 | 0.803 | 1     | 0.975 | -0.68 |
| 1429486_at   | Pfkfb2        | 6-phosphofructo-2-kinase/fructose-2,6-biphosphatase 2                         | -1.31 | 0.302 | -1.03 | 0.898 | -1.47 | 0.072 | 1.49  | 0.293 | -0.58 |
| 1426395_s_at | Eif3s1        | eukaryotic translation initiation factor 3, subunit 1 alpha                   | -1.28 | 0.202 | -1.4  | 0.008 | -1.09 | 0.496 | 1.4   | 0.411 | -0.59 |
| 1417199_at   | 1300007B12Rik | RIKEN cDNA 1300007B12 gene                                                    | -1.09 | 0.578 | -1.25 | 0.036 | -1.43 | 0.036 | 1.14  | 0.588 | -0.66 |
| 1437759_at   | Pfkp          | Phosphofructokinase, platelet                                                 | -1.04 | 0.856 | -2.65 | 0.036 | 1.08  | 0.81  | -1.13 | 0.654 | -0.93 |
| 1428203_at   | C030002O17Rik | RIKEN cDNA C030002O17 gene                                                    | -1.79 | 0.293 | -3.02 | 0.042 | 1.52  | 0.366 | -1.02 | 0.897 | -1.07 |
| 1441668_at   | E130107B13Rik | RIKEN cDNA E130107B13 gene                                                    | -1.54 | 0.209 | -1.32 | 0.196 | 1.01  | 0.939 | -1.4  | 0.076 | -0.81 |

|              |                   |                                                                                     |       |       |       |       |       |       |       |       |       |
|--------------|-------------------|-------------------------------------------------------------------------------------|-------|-------|-------|-------|-------|-------|-------|-------|-------|
| 1457434_s_at | Ptpla             | protein tyrosine phosphatase-like (proline instead of catalytic arginine), member ε | -1.19 | 0.381 | -1.04 | 0.747 | -1.63 | 0.011 | 2.83  | 0.262 | -0.26 |
| 1457216_at   | Rc3h1             | RING CCCH (C3H) domains 1                                                           | 1.05  | 0.852 | -1.43 | 0.211 | -1.51 | 0.039 | -1.01 | 0.949 | -0.72 |
| 1431800_at   | 1300010F03Rik     | RIKEN cDNA 1300010F03 gene                                                          | 1.01  | 0.846 | -1.4  | 0.242 | -1.44 | 0.136 | -1.65 | 0.345 | -0.87 |
| 1459313_at   | ---               | Transcribed locus                                                                   | 1.34  | 0.719 | -1.84 | 0.405 | -1.87 | 0.014 | -2.5  | 0.291 | -1.22 |
| 1427237_at   | 2410015M20Rik     | RIKEN cDNA 2410015M20 gene                                                          | 1.03  | 0.968 | -2.39 | 0.26  | -1.03 | 0.932 | -2.27 | 0.372 | -1.17 |
| 1422921_at   | Vpreb3            | pre-B lymphocyte gene 3                                                             | -1.31 | 0.177 | -1.91 | 0.338 | 1.13  | 0.751 | -2.9  | 0.044 | -1.25 |
| 1459440_at   | Nav3              | Neuron navigator 3                                                                  | -1.47 | 0.39  | 1.01  | 0.985 | -1.38 | 0.519 | -1.42 | 0.098 | -0.82 |
| 1416167_at   | Prdx4             | peroxiredoxin 4                                                                     | -1.11 | 0.351 | -1.34 | 0.006 | -1.3  | 0.012 | 1.7   | 0.009 | -0.51 |
| 1428324_at   | ---               | ---                                                                                 | 1.11  | 0.647 | -1.67 | 0.087 | -1.41 | 0.035 | -1.39 | 0.111 | -0.84 |
| 1456922_at   | 4933437K13Rik     | RIKEN cDNA 4933437K13 gene                                                          | -1.71 | 0.103 | 1.13  | 0.829 | -1.42 | 0.175 | -2.13 | 0.017 | -1.03 |
| 1439540_at   | 2-Mar             | membrane-associated ring finger (C3HC4) 2                                           | -1.06 | 0.894 | -2    | 0.128 | -1.03 | 0.884 | 3.15  | 0.242 | -0.24 |
| 1420944_at   | Zfp185            | zinc finger protein 185                                                             | -1.25 | 0.568 | -1.38 | 0.293 | -1.12 | 0.755 | 1.22  | 0.727 | -0.63 |
| 1436701_at   | Trim61            | tripartite motif-containing 61                                                      | 1.08  | 0.926 | -1.65 | 0.506 | -1.38 | 0.295 | -1.34 | 0.591 | -0.82 |
| 1457580_at   | Chd8              | chromodomain helicase DNA binding protein 8                                         | 1     | 0.992 | -1.17 | 0.613 | -1.79 | 0.162 | -1.43 | 0.241 | -0.85 |
| 1454016_at   | ---               | ---                                                                                 | -1.06 | 0.9   | -3.43 | 0.02  | 1.18  | 0.715 | -1.54 | 0.466 | -1.21 |
| 1456577_x_at | Pitrm1            | pitrilysin metallopeptidase 1                                                       | -1.18 | 0.58  | -1.26 | 0.434 | -1.28 | 0.154 | 1.91  | 0.303 | -0.45 |
| 1439344_at   | ---               | Transcribed locus                                                                   | -1.14 | 0.588 | -1.14 | 0.505 | -1.51 | 0.051 | 1.08  | 0.631 | -0.68 |
| 1449828_at   | Ptgfr             | prostaglandin F receptor                                                            | -1.29 | 0.682 | -1.61 | 0.492 | 1.02  | 0.957 | -1.39 | 0.053 | -0.82 |
| 1423307_s_at | Tgoln1 /// Tgoln2 | trans-golgi network protein /// trans-golgi network protein 2                       | -1.1  | 0.25  | -1.43 | 0.001 | -1.24 | 0.245 | 1.04  | 0.868 | -0.68 |
| 1416042_s_at | Nasp              | nuclear autoantigenic sperm protein (histone-binding)                               | -1.32 | 0.13  | -1.32 | 0.026 | -1.11 | 0.458 | 1.69  | 0.202 | -0.51 |
| 1451186_at   | Isg201            | interferon stimulated exonuclease gene 20-like 1                                    | -1.02 | 0.969 | -1.35 | 0.656 | -1.43 | 0.1   | 1.42  | 0.261 | -0.6  |
| 1437564_at   | Polg              | polymerase (DNA directed), gamma                                                    | 1.02  | 0.965 | -1.25 | 0.784 | -1.68 | 0.249 | -1.28 | 0.116 | -0.8  |
| 1442277_at   | Chka              | choline kinase alpha                                                                | -1.08 | 0.752 | 1.05  | 0.894 | -2.26 | 0.006 | -1.38 | 0.185 | -0.92 |
| 1443867_at   | Ankrd12           | ankyrin repeat domain 12                                                            | -1.34 | 0.272 | 1.02  | 0.923 | -1.53 | 0.205 | -1.22 | 0.604 | -0.77 |
| 1434766_at   | ---               | Mus musculus, clone IMAGE:1512359, mRNA                                             | -1.09 | 0.339 | -1.32 | 0.052 | -1.35 | 0.008 | 1.4   | 0.425 | -0.59 |
| 1455094_s_at | Ube2g1            | ubiquitin-conjugating enzyme E2G 1 (UBC7 homolog, C. elegans)                       | -1.17 | 0.313 | -1.17 | 0.183 | -1.42 | 0.203 | 1.2   | 0.092 | -0.64 |
| 1420741_x_at | 2310069N01Rik     | RIKEN cDNA 2310069N01 gene                                                          | -1.6  | 0.132 | -1.96 | 0.125 | 1.28  | 0.534 | -1.2  | 0.734 | -0.87 |
| 1455748_at   | Gpr178            | G protein-coupled receptor 178                                                      | -1.96 | 0.198 | 1.15  | 0.531 | -1.32 | 0.289 | -1.78 | 0.386 | -0.98 |
| 1445705_x_at | Dpp8              | dipeptidylpeptidase 8                                                               | 1.37  | 0.327 | -1.6  | 0.495 | -2.36 | 0.353 | -1.46 | 0.594 | -1.01 |
| 1450610_at   | Ucn               | urocortin                                                                           | -1.37 | 0.388 | -1.74 | 0.332 | 1.11  | 0.758 | -2.95 | 0.178 | -1.24 |
| 1427861_at   | Arl6ip3           | ADP-ribosylation factor-like 6 interacting protein 3                                | -1.18 | 0.587 | -1.49 | 0.466 | -1.11 | 0.519 | 1.08  | 0.714 | -0.67 |
| 1454866_s_at | Clic6             | chloride intracellular channel 6                                                    | -3.79 | 0.005 | -1.45 | 0.381 | 1.47  | 0.148 | -1.26 | 0.784 | -1.26 |
| 1452138_a_at | Ace2              | angiotensin I converting enzyme (peptidyl-dipeptidase A) 2                          | -1.15 | 0.471 | -2.54 | 0.049 | 1.15  | 0.621 | -1.47 | 0.562 | -1    |
| 1439294_at   | D530008I22        | hypothetical protein D530008I22                                                     | -1.11 | 0.628 | -1.61 | 0.418 | -1.12 | 0.55  | 1.1   | 0.671 | -0.68 |
| 1439203_at   | Satb1             | Special AT-rich sequence binding protein 1                                          | 1.01  | 0.958 | -1.29 | 0.417 | -1.59 | 0.013 | -2.29 | 0.344 | -1.04 |
| 1435065_x_at | Vav2              | Vav2 oncogene                                                                       | -1.29 | 0.367 | -2.86 | 0.05  | 1.29  | 0.287 | -1.26 | 0.515 | -1.03 |
| 1457586_at   | Rasa2             | RAS p21 protein activator 2                                                         | -1.19 | 0.403 | 1.12  | 0.757 | -2.21 | 0.001 | -1.65 | 0.142 | -0.98 |
| 1446120_at   | Uhmk1             | U2AF homology motif (UHM) kinase 1                                                  | -1.24 | 0.225 | 1.13  | 0.663 | -2.05 | 0.186 | -1.04 | 0.95  | -0.8  |
| 1449443_at   | Decr1             | 2,4-dienoyl CoA reductase 1, mitochondrial                                          | -1.02 | 0.894 | -1.84 | 0.127 | -1.11 | 0.603 | 1.24  | 0.085 | -0.68 |
| 1438516_at   | Rif1              | Rap1 interacting factor 1 homolog (yeast)                                           | -1.04 | 0.693 | -1.4  | 0.215 | -1.35 | 0.064 | 1.03  | 0.87  | -0.69 |
| 1456390_at   | ---               | ---                                                                                 | -1.08 | 0.608 | -1.19 | 0.061 | -1.53 | 0.011 | 1.09  | 0.483 | -0.68 |
| 1456384_at   | Nlgn3             | neuroligin 3                                                                        | -1.17 | 0.826 | 1.18  | 0.78  | -2.62 | 0.09  | -1.54 | 0.643 | -1.04 |
| 1418802_at   | R74862            | expressed sequence R74862                                                           | -1.07 | 0.828 | -1.76 | 0.353 | -1.09 | 0.755 | 1.18  | 0.031 | -0.69 |
| 1456231_at   | Pla2g3            | phospholipase A2, group III                                                         | -1.12 | 0.101 | -1.92 | 0.284 | 1.01  | 0.959 | -1.13 | 0.429 | -0.79 |
| 1446051_at   | Gm1140            | gene model 1140, (NCBI)                                                             | -1.55 | 0.573 | -1.55 | 0.405 | 1.13  | 0.817 | -1.21 | 0.742 | -0.8  |
| 1418694_at   | Kcmf1             | potassium channel modulatory factor 1                                               | -1.02 | 0.848 | -1.38 | 0.057 | -1.39 | 0.026 | 1.11  | 0.518 | -0.67 |
| 1418496_at   | Foxa1             | forkhead box A1                                                                     | -1.21 | 0.254 | -2.44 | 0.014 | 1.18  | 0.235 | -1.2  | 0.754 | -0.92 |
| 1457515_at   | Hipk1             | Homeodomain interacting protein kinase 1                                            | -1.16 | 0.5   | -1.43 | 0.325 | -1.16 | 0.435 | 1.81  | 0.232 | -0.49 |
| 1418537_at   | 0610042E07Rik     | RIKEN cDNA 0610042E07 gene                                                          | -1.56 | 0.116 | -1.3  | 0.041 | 1.01  | 0.937 | -1.39 | 0.165 | -0.81 |
| 1453004_at   | 3110004L20Rik     | RIKEN cDNA 3110004L20 gene                                                          | -1.23 | 0.297 | -1.19 | 0.053 | -1.31 | 0.166 | 3.98  | 0.162 | 0.06  |
| 1429431_at   | Zfpn1a5           | zinc finger protein, subfamily 1A, 5                                                | -1.06 | 0.011 | -1.24 | 0.165 | -1.5  | 0.029 | 1.58  | 0.214 | -0.55 |
| 1454410_at   | 9130414P19Rik     | RIKEN cDNA 9130414P19 gene                                                          | -2.19 | 0.257 | -1.07 | 0.938 | 1.03  | 0.868 | -2.02 | 0.283 | -1.06 |
| 1419918_at   | Tmed7             | transmembrane emp24 protein transport domain containing 7                           | -1.07 | 0.783 | -1.09 | 0.492 | -1.75 | 0.043 | 1.19  | 0.158 | -0.68 |

|              |               |                                                                                 |       |       |       |       |       |       |       |       |       |
|--------------|---------------|---------------------------------------------------------------------------------|-------|-------|-------|-------|-------|-------|-------|-------|-------|
| 1437589_x_at | Lime1         | Lck interacting transmembrane adaptor 1                                         | -1.77 | 0.003 | -1.22 | 0.167 | 1.03  | 0.755 | -1.42 | 0.334 | -0.84 |
| 1440901_at   | Dgkb          | diacylglycerol kinase, beta                                                     | -1.21 | 0.064 | -1.29 | 0.556 | -1.22 | 0.483 | 1.11  | 0.827 | -0.65 |
| 1453976_at   | 4432414F05Rik | RIKEN cDNA 4432414F05 gene                                                      | -1.2  | 0.447 | -1.14 | 0.756 | -1.41 | 0.332 | 1.22  | 0.462 | -0.63 |
| 1451485_at   | 3300001P08Rik | RIKEN cDNA 3300001P08 gene                                                      | -1.03 | 0.834 | -1.32 | 0.26  | -1.44 | 0.215 | 1.02  | 0.93  | -0.69 |
| 1446253_at   | ---           | Adult male medulla oblongata cDNA, RIKEN full-length enriched library, clone:63 | -1.56 | 0.038 | -1.38 | 0.198 | 1.05  | 0.217 | -1.19 | 0.674 | -0.77 |
| 1439330_at   | D230040J21Rik | RIKEN cDNA D230040J21 gene                                                      | -1.44 | 0.01  | 1.12  | 0.712 | -1.66 | 0.085 | -1.27 | 0.076 | -0.81 |
| 1430538_at   | 2210013O21Rik | RIKEN cDNA 2210013O21 gene                                                      | -1.05 | 0.607 | -1.23 | 0.047 | -1.52 | 0     | 1.05  | 0.744 | -0.69 |
| 1424405_at   | Mbip          | MAP3K12 binding inhibitory protein 1                                            | -1.35 | 0.18  | 1.05  | 0.6   | -1.59 | 0.002 | -1.2  | 0.158 | -0.77 |
| 1422099_a_at | Oprl1         | opioid receptor-like 1                                                          | 1.21  | 0.836 | -1.6  | 0.289 | -1.71 | 0.317 | -1.21 | 0.743 | -0.83 |
| 1455808_at   | 4922502D21Rik | RIKEN cDNA 4922502D21 gene                                                      | -1.16 | 0.473 | -1    | 1     | -1.78 | 0.374 | 1.25  | 0.384 | -0.67 |
| 1427061_at   | Rbbp8         | retinoblastoma binding protein 8                                                | -1.39 | 0.17  | -1.03 | 0.819 | -1.37 | 0.048 | 1.7   | 0.14  | -0.52 |
| 1459304_at   | A730054J21Rik | RIKEN cDNA A730054J21 gene                                                      | -1.55 | 0.475 | -1.24 | 0.187 | -1.03 | 0.909 | 2.08  | 0.273 | -0.43 |
| 1460126_at   | Usp34         | Ubiquitin specific peptidase 34                                                 | 1.21  | 0.184 | -1.63 | 0.019 | -1.66 | 0.027 | -1.14 | 0.651 | -0.81 |
| 1443681_at   | AI595406      | Expressed sequence AI595406                                                     | -1.29 | 0.483 | -1.2  | 0.565 | -1.24 | 0.383 | 1.24  | 0.431 | -0.62 |
| 1421617_at   | Trpm8         | transient receptor potential cation channel, subfamily M, member 8              | -2.36 | 0.431 | 1.43  | 0.232 | -1.76 | 0.266 | -2.33 | 0.079 | -1.25 |
| 1428401_at   | Zcchc3        | zinc finger, CCHC domain containing 3                                           | -1.16 | 0.242 | -1.4  | 0.158 | -1.18 | 0.031 | 1.26  | 0.329 | -0.62 |
| 1430790_at   | 4930485G23Rik | RIKEN cDNA 4930485G23 gene                                                      | -2.1  | 0.403 | 1.14  | 0.623 | -1.24 | 0.67  | -1.94 | 0.351 | -1.03 |
| 1418517_at   | Irx3          | Iroquois related homeobox 3 (Drosophila)                                        | -1.28 | 0.573 | -3.28 | 0.019 | 1.34  | 0.215 | -1.53 | 0.254 | -1.19 |
| 1445896_at   | 2810433D01Rik | RIKEN cDNA 2810433D01 gene                                                      | 1.07  | 0.505 | -1.25 | 0.73  | -1.8  | 0.047 | -4.05 | 0.008 | -1.51 |
| 1457447_at   | Rb1           | Retinoblastoma 1                                                                | -1.11 | 0.409 | -1.16 | 0.236 | -1.52 | 0.109 | 1.29  | 0.269 | -0.62 |
| 1456809_at   | ---           | Adult male thymus cDNA, RIKEN full-length enriched library, clone:5830435O18    | -1.41 | 0.015 | -1.52 | 0.145 | 1.06  | 0.873 | -1.03 | 0.878 | -0.73 |
| 1459887_at   | ---           | Transcribed locus                                                               | 1.13  | 0.738 | -1.68 | 0.003 | -1.44 | 0.139 | -1.19 | 0.456 | -0.79 |
| 1425492_at   | Bmpr1a        | bone morphogenetic protein receptor, type 1A                                    | -1.07 | 0.663 | -1.24 | 0.011 | -1.46 | 0.016 | 1.11  | 0.557 | -0.67 |
| 1445512_at   | ---           | ---                                                                             | 1.07  | 0.753 | -1.36 | 0.335 | -1.63 | 0.123 | -1.09 | 0.712 | -0.75 |
| 1434053_x_at | Atp5k         | ATP synthase, H+ transporting, mitochondrial F1F0 complex, subunit e            | -1.19 | 0.003 | -1.3  | 0.069 | -1.23 | 0.082 | 1.06  | 0.257 | -0.67 |
| 1432473_a_at | Abca14        | ATP-binding cassette, sub-family A (ABC1), member 14                            | -2.35 | 0.063 | 1.15  | 0.546 | -1.18 | 0.653 | -1.3  | 0.658 | -0.92 |
| 1444759_at   | Prickle1      | prickle like 1 (Drosophila)                                                     | -1.84 | 0.154 | -1.51 | 0.481 | 1.22  | 0.826 | -1.43 | 0.543 | -0.89 |
| 1447174_at   | Dach1         | Dachshund 1 (Drosophila)                                                        | -1.26 | 0.319 | -1.02 | 0.982 | -1.55 | 0.13  | 1.48  | 0.482 | -0.59 |
| 1456408_x_at | 4933439C10Rik | RIKEN cDNA 4933439C10 gene                                                      | -1.66 | 0.022 | 1.05  | 0.922 | -1.29 | 0.224 | -1.7  | 0.232 | -0.9  |
| 1453667_at   | 1700065D16Rik | RIKEN cDNA 1700065D16 gene                                                      | 1.37  | 0.589 | -2.19 | 0.269 | -1.67 | 0.242 | -1.17 | 0.726 | -0.91 |
| 1425314_at   | Gpr98         | G protein-coupled receptor 98                                                   | -1.58 | 0.418 | 1.07  | 0.786 | -1.38 | 0.088 | -1.17 | 0.806 | -0.77 |
| 1448042_s_at | Rnf2          | ring finger protein 2                                                           | -1.59 | 0.05  | 1.06  | 0.904 | -1.35 | 0.537 | -1.87 | 0.547 | -0.94 |
| 1455807_at   | Tspyl5        | testis-specific protein, Y-encoded-like 5                                       | -1.17 | 0.374 | -1.56 | 0.228 | -1.08 | 0.554 | 1.92  | 0.137 | -0.47 |
| 1447156_at   | Chm           | Choroideremia                                                                   | 1.05  | 0.768 | -1.43 | 0.006 | -1.47 | 0.028 | -1.5  | 0.264 | -0.84 |
| 1440392_at   | Akap13        | A kinase (PRKA) anchor protein 13                                               | -1.2  | 0.27  | -1.13 | 0.526 | -1.43 | 0.185 | 1.74  | 0.168 | -0.5  |
| 1459245_s_at | Grid2         | glutamate receptor, ionotropic, delta 2                                         | -2.24 | 0.295 | -1.01 | 0.965 | -1.01 | 0.746 | 1.73  | 0.345 | -0.63 |
| 1456717_at   | Tead1         | TEA domain family member 1                                                      | -1.04 | 0.961 | 1.12  | 0.84  | -2.98 | 0.209 | -1.32 | 0.129 | -1.05 |
| 1440264_at   | ---           | ---                                                                             | 1.05  | 0.879 | -1.83 | 0.129 | -1.22 | 0.295 | -2.29 | 0.069 | -1.07 |
| 1443972_at   | AI465300      | expressed sequence AI465300                                                     | -1.55 | 0.426 | 1.03  | 0.969 | -1.33 | 0.489 | -2.47 | 0.017 | -1.08 |
| 1447606_x_at | Aqp11         | aquaporin 11                                                                    | -1.75 | 0.206 | -1.01 | 0.926 | -1.16 | 0.57  | 1.3   | 0.216 | -0.65 |
| 1454966_at   | Itga8         | integrin alpha 8                                                                | -1.13 | 0.505 | -1.16 | 0.26  | -1.48 | 0.045 | 1.11  | 0.78  | -0.66 |
| 1433109_at   | Mif           | macrophage migration inhibitory factor                                          | -1.92 | 0.113 | -1.01 | 0.986 | -1.1  | 0.791 | 1.07  | 0.847 | -0.74 |
| 1454063_at   | 4933412E24Rik | RIKEN cDNA 4933412E24 gene                                                      | -1.48 | 0.609 | -1.75 | 0.322 | 1.18  | 0.796 | -1.44 | 0.263 | -0.87 |
| 1420118_s_at | ---           | ---                                                                             | -1.54 | 0.648 | 1.14  | 0.842 | -1.56 | 0.142 | -1.01 | 0.964 | -0.74 |
| 1421363_at   | Cyp2c39       | cytochrome P450, family 2, subfamily c, polypeptide 39                          | -1.39 | 0.677 | 1.09  | 0.564 | -1.62 | 0.44  | -1.11 | 0.861 | -0.76 |
| 1438553_x_at | 4930453N24Rik | RIKEN cDNA 4930453N24 gene                                                      | -1.07 | 0.75  | -1.21 | 0.266 | -1.49 | 0.032 | 1.16  | 0.455 | -0.66 |
| 1424944_at   | Pcp2          | Purkinje cell protein 2 (L7)                                                    | -1.14 | 0.832 | 1.08  | 0.903 | -2.15 | 0.251 | -1.23 | 0.525 | -0.86 |
| 1445815_at   | Fzd8          | frizzled homolog 8 (Drosophila)                                                 | 1.39  | 0.211 | -1.97 | 0.128 | -1.9  | 0.055 | -1.58 | 0.351 | -1.02 |
| 1442352_at   | 9430091N11Rik | RIKEN cDNA 9430091N11 gene                                                      | -1.49 | 0.568 | 1.42  | 0.515 | -3.01 | 0.074 | -1.34 | 0.492 | -1.1  |
| 1450750_a_at | Nr4a2         | nuclear receptor subfamily 4, group A, member 2                                 | -1.69 | 0.144 | -1.02 | 0.966 | -1.18 | 0.439 | 1.07  | 0.699 | -0.7  |
| 1453771_at   | Gulp1         | GULP, engulfment adaptor PTB domain containing 1                                | 1.12  | 0.701 | -1.82 | 0.105 | -1.32 | 0.133 | -1.3  | 0.204 | -0.83 |
| 1453656_a_at | 4933431G14Rik | RIKEN cDNA 4933431G14 gene                                                      | -1.01 | 0.961 | -1.98 | 0.06  | -1.07 | 0.886 | 1.16  | 0.661 | -0.73 |
| 1441707_at   | ---           | ---                                                                             | -1.13 | 0.543 | 1.01  | 0.957 | -1.87 | 0.03  | -1.33 | 0.456 | -0.83 |

|              |                   |                                                                                      |       |       |       |       |       |       |       |       |       |
|--------------|-------------------|--------------------------------------------------------------------------------------|-------|-------|-------|-------|-------|-------|-------|-------|-------|
| 1447122_at   | ---               | ---                                                                                  | -1.06 | 0.44  | -1.24 | 0.064 | -1.47 | 0.06  | 1.14  | 0.393 | -0.66 |
| 1453716_at   | 4930480K23Rik     | RIKEN cDNA 4930480K23 gene                                                           | -1.24 | 0.522 | -1.94 | 0.087 | 1.1   | 0.67  | -1.19 | 0.003 | -0.82 |
| 1432593_at   | 4933428P19Rik     | RIKEN cDNA 4933428P19 gene                                                           | -1.34 | 0.116 | -1.22 | 0.497 | -1.16 | 0.422 | 2.17  | 0.243 | -0.39 |
| 1424717_at   | Mis12             | MIS12 homolog (yeast)                                                                | -1.46 | 0.282 | -1.14 | 0.373 | -1.15 | 0.302 | 1.7   | 0.248 | -0.51 |
| 1460401_at   | Edem3             | ER degradation enhancer, mannosidase alpha-like 3                                    | -1.13 | 0.229 | -1.21 | 0.235 | -1.39 | 0.059 | 1.05  | 0.272 | -0.67 |
| 1449030_at   | Syn2              | synapsin II                                                                          | -1.42 | 0.333 | -1.16 | 0.664 | -1.17 | 0.718 | 1.85  | 0.26  | -0.47 |
| 1431346_at   | 6330405D24Rik     | RIKEN cDNA 6330405D24 gene                                                           | -1.17 | 0.809 | -1.54 | 0.346 | -1.09 | 0.833 | 1.34  | 0.216 | -0.61 |
| 1440272_at   | Eif2s1            | Eukaryotic translation initiation factor 2, subunit 1 alpha                          | -1.49 | 0.132 | 1.11  | 0.541 | -1.56 | 0.097 | -1.14 | 0.723 | -0.77 |
| 1439763_at   | Dnajc11           | DnaJ (Hsp40) homolog, subfamily C, member 11                                         | -1    | 0.999 | -1.17 | 0.738 | -1.74 | 0.239 | 1.41  | 0.353 | -0.63 |
| 1441473_at   | LOC666775 /// LOC | hypothetical protein LOC666775 /// hypothetical protein LOC671556                    | -1.07 | 0.892 | -1.93 | 0.265 | -1.03 | 0.81  | 1.02  | 0.945 | -0.75 |
| 1420930_s_at | Ctnnal1           | catenin (cadherin associated protein), alpha-like 1                                  | -1.14 | 0.196 | -1.23 | 0.393 | -1.35 | 0.052 | 1.03  | 0.881 | -0.67 |
| 1445079_at   | D15Ert320e        | DNA segment, Chr 15, ERATO Doi 320, expressed                                        | -1.29 | 0.337 | -1.62 | 0.401 | 1.04  | 0.913 | -1.48 | 0.387 | -0.84 |
| 1443716_at   | ---               | ---                                                                                  | -1.05 | 0.86  | -1.39 | 0.651 | -1.33 | 0.207 | 1.15  | 0.48  | -0.65 |
| 1439177_at   | ---               | Transcribed locus                                                                    | -1.22 | 0.435 | -1.18 | 0.681 | -1.31 | 0.24  | 1.13  | 0.864 | -0.65 |
| 1422349_at   | Ccr1l1            | chemokine (C-C motif) receptor 1-like 1                                              | -1.52 | 0.022 | -1.41 | 0.452 | 1.06  | 0.896 | -1.08 | 0.886 | -0.74 |
| 1424087_at   | 1810042K04Rik     | RIKEN cDNA 1810042K04 gene                                                           | -1.41 | 0.277 | 1.03  | 0.878 | -1.46 | 0.297 | -1.08 | 0.575 | -0.73 |
| 1444308_at   | ---               | ---                                                                                  | -1.03 | 0.885 | -1.6  | 0.194 | -1.2  | 0.455 | 1.64  | 0.282 | -0.55 |
| 1447121_at   | 0610038K03Rik     | RIKEN cDNA 0610038K03 gene                                                           | 1     | 0.993 | -1.6  | 0.032 | -1.25 | 0.255 | -1.33 | 0.374 | -0.79 |
| 1425117_at   | 0610012D14Rik     | RIKEN cDNA 0610012D14 gene                                                           | -1.21 | 0.295 | -1.21 | 0.057 | -1.3  | 0.529 | 1.44  | 0.501 | -0.57 |
| 1423498_at   | Aldoa-ps1         | aldolase 1, A isoform, pseudogene 1                                                  | 1.14  | 0.508 | -2.06 | 0.29  | -1.25 | 0.616 | -1.08 | 0.709 | -0.81 |
| 1438300_at   | 4921511I16Rik     | RIKEN cDNA 4921511I16 gene                                                           | -1.33 | 0.431 | -1.05 | 0.879 | -1.39 | 0.08  | 1.14  | 0.059 | -0.66 |
| 1445974_at   | ---               | Transcribed locus                                                                    | -1.13 | 0.749 | -1.19 | 0.796 | -1.43 | 0.601 | 1.07  | 0.834 | -0.67 |
| 1455454_at   | Akr1c19           | aldo-keto reductase family 1, member C19                                             | -1.15 | 0.273 | -1.45 | 0.325 | -1.15 | 0.478 | 1     | 0.984 | -0.69 |
| 1457913_at   | 5730601F06Rik     | RIKEN cDNA 5730601F06 gene                                                           | 1.12  | 0.176 | -1.13 | 0.264 | -2.37 | 0.01  | -1.62 | 0.215 | -1    |
| 1441760_at   | LOC243302 /// LOC | similar to 40S ribosomal protein S25 /// similar to 40S ribosomal protein S25 /// hy | 1.33  | 0.554 | -3.01 | 0.312 | -1.3  | 0.093 | -1.16 | 0.506 | -1.04 |
| 1448002_x_at | 2610001J05Rik     | RIKEN cDNA 2610001J05 gene                                                           | -1.19 | 0.694 | -1.9  | 0.358 | 1.06  | 0.872 | -1.54 | 0.381 | -0.89 |
| 1453548_at   | ---               | ---                                                                                  | -1.43 | 0.007 | -1.62 | 0.359 | 1.11  | 0.757 | -1.33 | 0.602 | -0.82 |
| 1419620_at   | Pttg1             | pituitary tumor-transforming 1                                                       | -1.3  | 0.27  | -1.57 | 0.021 | 1.02  | 0.879 | -1.2  | 0.435 | -0.76 |
| 1440885_at   | Evl               | Ena-vasodilator stimulated phosphoprotein                                            | -1.54 | 0.025 | 1     | 0.99  | -1.29 | 0.219 | -1.95 | 0.113 | -0.94 |
| 1455508_at   | A530082C11Rik     | RIKEN cDNA A530082C11 gene                                                           | -1.15 | 0.311 | -1.38 | 0.093 | -1.2  | 0.179 | 1.2   | 0.194 | -0.63 |
| 1440800_at   | LOC665193         | hypothetical protein LOC665193                                                       | -1.06 | 0.864 | -1.29 | 0.491 | -1.42 | 0.302 | 1.21  | 0.526 | -0.64 |
| 1438581_at   | 4932439K10Rik     | RIKEN cDNA 4932439K10 gene                                                           | -1.64 | 0.391 | 1.33  | 0.645 | -2.06 | 0.038 | -1.27 | 0.682 | -0.91 |
| 1457374_at   | Nedd4l            | neural precursor cell expressed, developmentally down-regulated gene 4-like          | -1.15 | 0.303 | 1.09  | 0.649 | -2.15 | 0.016 | -1.43 | 0.198 | -0.91 |
| 1453987_at   | Btbd5             | BTB (POZ) domain containing 5                                                        | 1.17  | 0.852 | -2.13 | 0.067 | -1.28 | 0.173 | -1.66 | 0.011 | -0.97 |
| 1459020_at   | Amigo1            | adhesion molecule with Ig like domain 1                                              | -1.5  | 0.145 | -1.04 | 0.923 | -1.25 | 0.221 | 1.37  | 0.511 | -0.61 |
| 1453779_at   | 1700020L24Rik     | RIKEN cDNA 1700020L24 gene                                                           | -1.26 | 0.624 | -4.99 | 0.012 | 1.43  | 0.361 | -1.45 | 0.366 | -1.56 |
| 1425768_at   | Diablo            | diablo homolog (Drosophila)                                                          | -2.14 | 0.149 | -1.12 | 0.73  | 1.07  | 0.672 | -1.05 | 0.868 | -0.81 |
| 1446413_at   | 4930555G07Rik     | RIKEN cDNA 4930555G07 gene                                                           | -1.08 | 0.836 | -1.28 | 0.448 | -1.39 | 0.52  | 1.84  | 0.284 | -0.48 |
| 1428561_at   | 2610002J23Rik     | RIKEN cDNA 2610002J23 gene                                                           | -1.21 | 0.017 | -1.23 | 0.157 | -1.27 | 0.055 | 1.02  | 0.842 | -0.67 |
| 1419694_at   | St8sia1           | ST8 alpha-N-acetyl-neuraminide alpha-2,8-sialyltransferase 1                         | 1.11  | 0.725 | -2.71 | 0.029 | -1.05 | 0.929 | -1.36 | 0.051 | -1    |
| 1457067_at   | Vps4b             | Vacuolar protein sorting 4b (yeast)                                                  | -1.1  | 0.495 | -1.39 | 0.395 | -1.25 | 0.14  | 1.1   | 0.57  | -0.66 |
| 1422605_at   | Ppp1r1a           | protein phosphatase 1, regulatory (inhibitor) subunit 1A                             | 1     | 0.987 | -2.1  | 0.127 | -1.05 | 0.881 | -1.89 | 0.282 | -1.01 |
| 1419453_at   | Uchl5             | ubiquitin carboxyl-terminal esterase L5                                              | -1.22 | 0.542 | -1.2  | 0.558 | -1.29 | 0.075 | 1.06  | 0.809 | -0.66 |
| 1459168_at   | Zfp521            | Zinc finger protein 521                                                              | -1.35 | 0.392 | -1.1  | 0.778 | -1.29 | 0.17  | 1.34  | 0.437 | -0.6  |
| 1440586_at   | B430203I24Rik     | RIKEN cDNA B430203I24 gene                                                           | -1.16 | 0.015 | 1.11  | 0.744 | -2.18 | 0.022 | -1.12 | 0.553 | -0.84 |
| 1432817_x_at | 4930413G21Rik     | RIKEN cDNA 4930413G21 gene                                                           | 1.2   | 0.644 | -1.57 | 0.086 | -1.7  | 0.277 | -1.19 | 0.78  | -0.81 |
| 1432110_at   | 4930402F06Rik     | RIKEN cDNA 4930402F06 gene                                                           | 1.14  | 0.895 | -1.34 | 0.394 | -1.84 | 0.143 | -1.15 | 0.432 | -0.8  |
| 1434905_at   | BC064011          | cDNA sequence BC064011                                                               | -1.01 | 0.976 | -1.13 | 0.769 | -1.8  | 0.073 | 2.2   | 0.027 | -0.43 |
| 1436253_at   | Pex16             | peroxisome biogenesis factor 16                                                      | 1.37  | 0.473 | -1.39 | 0.104 | -2.91 | 0.132 | -1.13 | 0.688 | -1.02 |
| 1422288_at   | Htr1b             | 5-hydroxytryptamine (serotonin) receptor 1B                                          | -1.01 | 0.952 | -1.51 | 0.076 | -1.29 | 0.355 | 1.11  | 0.636 | -0.67 |
| 1446218_at   | Ppfia2            | protein tyrosine phosphatase, receptor type, f polypeptide (PTPRF), interacting p    | -1.88 | 0.24  | -1.23 | 0.397 | 1.09  | 0.816 | -1.26 | 0.524 | -0.82 |
| 1445662_x_at | ---               | Transcribed locus                                                                    | -1.74 | 0.142 | 1.04  | 0.852 | -1.23 | 0.333 | -1.47 | 0.104 | -0.85 |
| 1458682_at   | D130059P03Rik     | RIKEN cDNA D130059P03 gene                                                           | 1.68  | 0.382 | -4.53 | 0.051 | -1.89 | 0.184 | -1.01 | 0.989 | -1.44 |

|              |                    |                                                                                        |       |       |       |       |       |       |       |       |       |
|--------------|--------------------|----------------------------------------------------------------------------------------|-------|-------|-------|-------|-------|-------|-------|-------|-------|
| 1444767_at   | Gnas               | GNAS (guanine nucleotide binding protein, alpha stimulating) complex locus             | 1.24  | 0.726 | -1.59 | 0.289 | -1.78 | 0.097 | -1.43 | 0.334 | -0.89 |
| 1421423_at   | Prp10              | prolactin-like protein O                                                               | -2.09 | 0.343 | -1.65 | 0.147 | 1.35  | 0.396 | -1.32 | 0.577 | -0.93 |
| 1442722_at   | ---                | Transcribed locus                                                                      | -2.32 | 0.315 | -1.56 | 0.164 | 1.36  | 0.634 | -1.3  | 0.73  | -0.95 |
| 1439263_at   | Fin15              | fibroblast growth factor inducible 15                                                  | -1.13 | 0.481 | -1.27 | 0.059 | -1.32 | 0.376 | 1.16  | 0.504 | -0.64 |
| 1454010_a_at | 1700025E21Rik      | RIKEN cDNA 1700025E21 gene                                                             | -1.31 | 0.22  | 1.08  | 0.884 | -1.69 | 0.214 | -2.2  | 0.059 | -1.03 |
| 1420554_a_at | Rac3               | RAS-related C3 botulinum substrate 3                                                   | -1.27 | 0.267 | -2.01 | 0.058 | 1.14  | 0.709 | -1.14 | 0.539 | -0.82 |
| 1438927_x_at | LOC227054 /// Rplz | similar to 60S ribosomal protein L23a /// ribosomal protein L23a /// hypothetical gene | -1.88 | 0.44  | -1.65 | 0.48  | 1.29  | 0.461 | -2.21 | 0.1   | -1.11 |
| 1441556_at   | Baz2b              | Bromodomain adjacent to zinc finger domain, 2B                                         | 1.07  | 0.37  | -1.36 | 0.083 | -1.59 | 0.021 | -1.72 | 0.015 | -0.9  |
| 1439840_at   | A430088C08Rik      | RIKEN cDNA A430088C08 gene                                                             | 1.01  | 0.955 | -1.28 | 0.286 | -1.56 | 0.088 | -1.77 | 0.304 | -0.9  |
| 1437347_at   | Ednrb              | endothelin receptor type B                                                             | 1.06  | 0.632 | -1.06 | 0.797 | -2.36 | 0.005 | -2.63 | 0.008 | -1.24 |
| 1433115_at   | 5730552O08Rik      | RIKEN cDNA 5730552O08 gene                                                             | -1.13 | 0.823 | -1.11 | 0.523 | -1.55 | 0.361 | 1.64  | 0.468 | -0.54 |
| 1456810_at   | Vps54              | vacuolar protein sorting 54 (yeast)                                                    | -1.4  | 0.105 | 1.14  | 0.595 | -1.74 | 0.075 | -1.11 | 0.701 | -0.78 |
| 1431519_at   | 4933406L23Rik      | RIKEN cDNA 4933406L23 gene                                                             | 1.14  | 0.763 | -1.75 | 0.282 | -1.4  | 0.199 | -1.49 | 0.424 | -0.87 |
| 1447718_at   | Pde4b              | phosphodiesterase 4B, cAMP specific                                                    | -1.18 | 0.829 | -1.85 | 0.287 | 1.04  | 0.933 | -3.45 | 0.387 | -1.36 |
| 1437821_at   | Diap1              | Diaphanous homolog 1 (Drosophila)                                                      | 1.08  | 0.493 | -1.31 | 0.313 | -1.71 | 0.007 | -1.33 | 0.316 | -0.82 |
| 1430622_at   | 4833423F13Rik      | RIKEN cDNA 4833423F13 gene                                                             | -1.11 | 0.729 | 1.07  | 0.836 | -2.15 | 0.033 | -2.67 | 0.053 | -1.22 |
| 1416324_s_at | Kctd20             | potassium channel tetramerisation domain containing 20                                 | -1.25 | 0.372 | -1.14 | 0.236 | -1.33 | 0.023 | 1.03  | 0.842 | -0.67 |
| 1445164_at   | 2210418O10Rik      | RIKEN cDNA 2210418O10 gene                                                             | -1.23 | 0.684 | -1.02 | 0.978 | -1.57 | 0.303 | 1.52  | 0.54  | -0.57 |
| 1446626_at   | D16H22S680E        | DNA segment, Chr 16, human D22S680E, expressed                                         | -1.12 | 0.746 | -1.15 | 0.613 | -1.51 | 0.11  | 1.93  | 0.111 | -0.46 |
| 1425606_at   | Slc5a8             | solute carrier family 5 (iodide transporter), member 8                                 | -1.31 | 0.473 | -1.31 | 0.558 | -1.1  | 0.775 | 2.14  | 0.415 | -0.4  |
| 1436396_at   | D430033N04Rik      | RIKEN cDNA D430033N04 gene                                                             | -1.23 | 0.436 | -1.51 | 0.392 | -1.05 | 0.823 | 2.86  | 0.092 | -0.23 |
| 1445505_at   | Ndst1              | N-deacetylase/N-sulfotransferase (heparan glucosaminyl) 1                              | -1.37 | 0.587 | 1.03  | 0.962 | -1.5  | 0.469 | -1.63 | 0.324 | -0.87 |
| 1443604_at   | ---                | ---                                                                                    | -2.17 | 0.467 | -1.64 | 0.282 | 1.36  | 0.405 | -1.79 | 0.156 | -1.06 |
| 1431674_at   | 2610303G11Rik      | RIKEN cDNA 2610303G11 gene                                                             | -1.27 | 0.558 | -1.64 | 0.022 | 1.04  | 0.866 | -1.74 | 0.443 | -0.9  |
| 1455002_at   | Ptp4a1             | protein tyrosine phosphatase 4a1                                                       | -1.15 | 0.326 | -1.21 | 0.304 | -1.36 | 0.099 | 1.31  | 0.278 | -0.6  |
| 1459518_at   | Gm489              | Gene model 489, (NCBI)                                                                 | -1.96 | 0.237 | -1.1  | 0.725 | 1.01  | 0.948 | -1.37 | 0.48  | -0.86 |
| 1446305_at   | ---                | Adult male corpora quadrigemina cDNA, RIKEN full-length enriched library, clone        | -1.63 | 0.516 | 1.05  | 0.943 | -1.3  | 0.596 | -1.59 | 0.217 | -0.87 |
| 1441178_at   | Dtw2               | DTW domain containing 2                                                                | -1.35 | 0.477 | -1.16 | 0.423 | -1.21 | 0.55  | 1.09  | 0.701 | -0.66 |
| 1441617_at   | Pcqap              | positive cofactor 2, multiprotein complex, glutamine/Q-rich-associated protein         | -1.28 | 0.044 | 1.01  | 0.924 | -1.55 | 0.092 | -1.26 | 0.013 | -0.77 |
| 1418176_at   | Vdr                | vitamin D receptor                                                                     | -1.19 | 0.031 | -1.53 | 0.397 | -1.07 | 0.521 | 1.3   | 0.283 | -0.62 |
| 1453104_at   | Mapk1              | mitogen activated protein kinase 1                                                     | -1.24 | 0.166 | -1.21 | 0.048 | -1.25 | 0.029 | 1.03  | 0.767 | -0.67 |
| 1438213_at   | A830018L16Rik      | RIKEN cDNA A830018L16 gene                                                             | -1.44 | 0.582 | -2.26 | 0.197 | 1.3   | 0.281 | -1.35 | 0.622 | -0.94 |
| 1429483_at   | Ndp52              | nuclear domain 10 protein 52                                                           | -1.45 | 0.564 | -1.49 | 0.509 | 1.07  | 0.85  | -1.32 | 0.479 | -0.8  |
| 1454653_at   | Cpne9              | copine family member IX                                                                | -1.8  | 0.109 | -1.23 | 0.534 | 1.07  | 0.48  | -1.3  | 0.186 | -0.82 |
| 1458360_at   | Spock2             | Sparc/osteonectin, cwcv and kazal-like domains proteoglycan 2                          | -1.7  | 0.244 | -1.4  | 0.387 | 1.13  | 0.767 | -1.27 | 0.663 | -0.81 |
| 1455037_at   | Plxna2             | plexin A2                                                                              | -1.23 | 0.342 | -1.19 | 0.31  | -1.28 | 0.351 | 1.24  | 0.567 | -0.62 |
| 1456986_at   | Zbtb16             | Zinc finger and BTB domain containing 16                                               | 1.02  | 0.98  | -1.19 | 0.751 | -1.74 | 0.286 | -2.07 | 0.147 | -0.99 |
| 1446346_at   | ---                | ---                                                                                    | -1.23 | 0.608 | 1.01  | 0.983 | -1.61 | 0.361 | -1.42 | 0.423 | -0.81 |
| 1418668_at   | Acsm1              | acyl-CoA synthetase medium-chain family member 1                                       | -1.19 | 0.527 | -1.1  | 0.19  | -1.46 | 0.218 | 1.75  | 0.201 | -0.5  |
| 1446161_at   | Taf11              | TAF11 RNA polymerase II, TATA box binding protein (TBP)-associated factor              | -1.3  | 0.575 | -1.52 | 0.335 | 1.01  | 0.982 | -1.04 | 0.953 | -0.71 |
| 1428519_at   | 2610528E23Rik      | RIKEN cDNA 2610528E23 gene                                                             | -1.08 | 0.755 | -1.46 | 0.144 | -1.22 | 0.167 | 1.26  | 0.373 | -0.62 |
| 1440213_a_at | 2010001M06Rik      | RIKEN cDNA 2010001M06 gene                                                             | -1.1  | 0.693 | -1.26 | 0.465 | -1.38 | 0.151 | 1     | 0.99  | -0.68 |
| 1440703_at   | 2810429I04Rik      | RIKEN cDNA 2810429I04 gene                                                             | -1.83 | 0.219 | 1.21  | 0.546 | -1.47 | 0.306 | -1.79 | 0.215 | -0.97 |
| 1442426_at   | Wapal              | wings apart-like homolog (Drosophila)                                                  | -1.25 | 0.039 | -1.28 | 0.184 | -1.17 | 0.212 | 1.62  | 0.277 | -0.52 |
| 1433271_at   | 9530004M16Rik      | RIKEN cDNA 9530004M16 gene                                                             | 1.04  | 0.934 | -1.36 | 0.028 | -1.51 | 0.371 | -1.12 | 0.697 | -0.74 |
| 1421325_at   | Pla2g2f            | phospholipase A2, group IIF                                                            | -1.11 | 0.855 | -1.51 | 0.313 | -1.15 | 0.818 | 1.34  | 0.587 | -0.61 |
| 1431410_at   | D16Ert472e         | DNA segment, Chr 16, ERATO Doi 472, expressed                                          | 1.03  | 0.964 | -1.72 | 0.404 | -1.21 | 0.404 | -1.84 | 0.398 | -0.93 |
| 1442464_at   | Fbxl20             | F-box and leucine-rich repeat protein 20                                               | -1.51 | 0.232 | -1.22 | 0.075 | -1.05 | 0.761 | 1.01  | 0.957 | -0.69 |
| 1444825_at   | ---                | ---                                                                                    | -3.35 | 0.094 | -1.35 | 0.315 | 1.4   | 0.29  | -1.02 | 0.963 | -1.08 |
| 1435510_at   | Ppm1h              | protein phosphatase 1H (PP2C domain containing)                                        | -1.27 | 0.292 | -1.55 | 0.046 | 1     | 0.989 | -1.62 | 0.159 | -0.86 |
| 1441966_at   | Trpm3              | transient receptor potential cation channel, subfamily M, member 3                     | -1.45 | 0.411 | -1.13 | 0.759 | -1.16 | 0.213 | 1.33  | 0.101 | -0.6  |
| 1431788_at   | 1700008G05Rik      | RIKEN cDNA 1700008G05 gene                                                             | -1.58 | 0.111 | -1.07 | 0.78  | -1.15 | 0.208 | 1.08  | 0.853 | -0.68 |
| 1459982_a_at | ---                | ---                                                                                    | -1.31 | 0.122 | -1.41 | 0.641 | -1.04 | 0.883 | 1.12  | 0.775 | -0.66 |

|              |               |                                                                                   |       |       |       |       |       |       |       |       |       |
|--------------|---------------|-----------------------------------------------------------------------------------|-------|-------|-------|-------|-------|-------|-------|-------|-------|
| 1449161_at   | Edn2          | endothelin 2                                                                      | -1.38 | 0.588 | -1.03 | 0.941 | -1.35 | 0.323 | 1.45  | 0.2   | -0.58 |
| 1432735_at   | 1700017H01Rik | RIKEN cDNA 1700017H01 gene                                                        | -1.12 | 0.721 | -2.07 | 0.319 | 1.06  | 0.725 | -1.25 | 0.203 | -0.84 |
| 1441863_x_at | ---           | ---                                                                               | -1.5  | 0.332 | -1.27 | 0.589 | -1.02 | 0.972 | 1.89  | 0.32  | -0.47 |
| 1427738_at   | D0Kist2       | DNA segment, KIST 2                                                               | -1.52 | 0.495 | 1.14  | 0.802 | -1.56 | 0.296 | -1.78 | 0.351 | -0.93 |
| 1457811_at   | ---           | ---                                                                               | 1.17  | 0.036 | -1.51 | 0.008 | -1.67 | 0.102 | -1.24 | 0.326 | -0.81 |
| 1416490_at   | Tmed6         | transmembrane emp24 protein transport domain containing 6                         | -1.29 | 0.345 | 1.04  | 0.949 | -1.6  | 0.201 | -1.38 | 0.186 | -0.81 |
| 1444186_at   | 2900006B13Rik | RIKEN cDNA 2900006B13 gene                                                        | -1.52 | 0.555 | -1.41 | 0.287 | 1.07  | 0.89  | -1.25 | 0.56  | -0.78 |
| 1443789_x_at | Cox8c         | cytochrome c oxidase, subunit VIIIc                                               | -1.55 | 0.477 | -2.08 | 0.302 | 1.31  | 0.382 | -1.32 | 0.647 | -0.91 |
| 1429904_at   | 4930507A01Rik | RIKEN cDNA 4930507A01 gene                                                        | 1.08  | 0.898 | -1.99 | 0.333 | -1.17 | 0.382 | -1.25 | 0.285 | -0.83 |
| 1425172_at   | Rho           | rhodopsin                                                                         | -1.14 | 0.703 | -1.47 | 0.55  | -1.13 | 0.788 | 1.35  | 0.515 | -0.6  |
| 1452315_at   | Kif11         | kinesin family member 11                                                          | -1.14 | 0.755 | -1.39 | 0.466 | -1.18 | 0.079 | 2.79  | 0.284 | -0.23 |
| 1420734_at   | Ppp1r3f       | protein phosphatase 1, regulatory (inhibitor) subunit 3F                          | -1.19 | 0.131 | -1.94 | 0.29  | 1.08  | 0.672 | -1.09 | 0.763 | -0.78 |
| 1453371_at   | 4930535B03Rik | RIKEN cDNA 4930535B03 gene                                                        | 1.11  | 0.568 | -1.06 | 0.689 | -2.63 | 0.006 | -1.85 | 0.05  | -1.11 |
| 1427584_at   | Amot          | angiomotin                                                                        | -1.61 | 0.132 | -1.39 | 0.489 | 1.1   | 0.751 | -1.27 | 0.452 | -0.79 |
| 1425246_at   | 0610008F07Rik | RIKEN cDNA 0610008F07 gene                                                        | -1.22 | 0.433 | -1.36 | 0.134 | -1.13 | 0.652 | 1.14  | 0.491 | -0.64 |
| 1442080_at   | Creb3l2       | CAMP responsive element binding protein 3-like 2                                  | -1.19 | 0.307 | -1.12 | 0.472 | -1.42 | 0.146 | 1.41  | 0.004 | -0.58 |
| 1420881_at   | Nsd1          | nuclear receptor-binding SET-domain protein 1                                     | -1.18 | 0.85  | -2.08 | 0.287 | 1.11  | 0.793 | -1.87 | 0.191 | -1    |
| 1460714_at   | Tcfcp2l1      | Transcription factor CP2-like 1                                                   | -1.38 | 0.065 | -1.81 | 0.094 | 1.16  | 0.718 | -1.44 | 0.562 | -0.87 |
| 1426362_at   | Tmem144       | transmembrane protein 144                                                         | -1.28 | 0.073 | -1.48 | 0.018 | -1.02 | 0.927 | 1.47  | 0.322 | -0.58 |
| 1436155_at   | Nmnat2        | nicotinamide nucleotide adenyltransferase 2                                       | -1.08 | 0.891 | -1.27 | 0.243 | -1.38 | 0.081 | 1.33  | 0.31  | -0.6  |
| 1456682_at   | Lonrf2        | LON peptidase N-terminal domain and ring finger 2                                 | 1.04  | 0.961 | -1.33 | 0.547 | -1.54 | 0.106 | -2.68 | 0.197 | -1.13 |
| 1430162_at   | 3830417A13Rik | RIKEN cDNA 3830417A13 gene                                                        | -1.47 | 0.624 | -1.14 | 0.807 | -1.13 | 0.688 | 1.16  | 0.842 | -0.65 |
| 1450485_at   | Sox3          | SRY-box containing gene 3                                                         | -1.19 | 0.767 | -4.35 | 0.097 | 1.37  | 0.541 | -1.13 | 0.705 | -1.32 |
| 1434670_at   | Kif5a         | kinesin family member 5A                                                          | -1.06 | 0.923 | 1.05  | 0.906 | -2.24 | 0.175 | -1.43 | 0.185 | -0.92 |
| 1445184_at   | 9130019O22Rik | RIKEN cDNA 9130019O22 gene                                                        | -1.09 | 0.708 | -1.91 | 0.345 | -1    | 0.997 | 1.2   | 0.771 | -0.7  |
| 1434020_at   | Pdap1         | PDGFA associated protein 1                                                        | -1.04 | 0.793 | -1.44 | 0.017 | -1.28 | 0.226 | 1.46  | 0.252 | -0.57 |
| 1460484_at   | Ttl           | tubulin tyrosine ligase                                                           | -1.16 | 0.214 | -1.59 | 0.505 | -1.05 | 0.806 | 1.07  | 0.867 | -0.69 |
| 1451739_at   | Klf5          | Kruppel-like factor 5                                                             | -1.09 | 0.524 | -1.44 | 0.085 | -1.21 | 0.185 | 1.52  | 0.489 | -0.56 |
| 1436082_at   | Myef2         | Myelin basic protein expression factor 2, repressor                               | -1.34 | 0.477 | -1.03 | 0.934 | -1.38 | 0.256 | 1.71  | 0.369 | -0.51 |
| 1442509_at   | Evi5          | Ecotropic viral integration site 5                                                | -1.19 | 0.013 | -1.07 | 0.71  | -1.5  | 0.014 | 3.03  | 0.232 | -0.18 |
| 1438548_x_at | Rhbdd3        | rhomboid domain containing 3                                                      | -1.14 | 0.504 | -1.15 | 0.246 | -1.44 | 0.088 | 1.18  | 0.628 | -0.64 |
| 1421893_a_at | Tpp2          | tripeptidyl peptidase II                                                          | -1.34 | 0.304 | -1.86 | 0     | 1.15  | 0.52  | -1.11 | 0.612 | -0.79 |
| 1442192_at   | Tyms          | thymidylate synthase                                                              | -1.07 | 0.811 | -1.08 | 0.818 | -1.72 | 0.028 | 1.9   | 0.315 | -0.49 |
| 1453447_at   | 1700109H08Rik | RIKEN cDNA 1700109H08 gene                                                        | -1.95 | 0.168 | 1.03  | 0.947 | -1.12 | 0.816 | -2.31 | 0.052 | -1.09 |
| 1424306_at   | Elov14        | elongation of very long chain fatty acids (FEN1/Elo2, SUR4/Elo3, yeast)-like 4    | -1.12 | 0.845 | 1.1   | 0.804 | -2.2  | 0.135 | -1.03 | 0.876 | -0.81 |
| 1431409_at   | C030015A19Rik | RIKEN cDNA C030015A19 gene                                                        | -1.23 | 0.546 | -1.24 | 0.428 | -1.21 | 0.258 | 1.03  | 0.896 | -0.66 |
| 1452310_at   | Tada2l        | transcriptional adaptor 2 (ADA2 homolog, yeast)-like                              | -1.17 | 0.043 | -1.24 | 0.141 | -1.28 | 0.205 | 1.39  | 0.102 | -0.58 |
| 1434804_at   | Sec15l2       | SEC15-like 2 (S. cerevisiae)                                                      | -1.11 | 0.51  | -1.05 | 0.509 | -1.71 | 0.001 | 1.03  | 0.81  | -0.71 |
| 1417347_at   | Pycard        | PYD and CARD domain containing                                                    | -1.44 | 0.173 | 1.05  | 0.884 | -1.44 | 0.054 | -2.4  | 0.245 | -1.06 |
| 1447481_at   | Setd5         | SET domain containing 5                                                           | 1.09  | 0.757 | -1.68 | 0.185 | -1.32 | 0.256 | -1.05 | 0.778 | -0.74 |
| 1422252_a_at | Cdc25c        | cell division cycle 25 homolog C (S. cerevisiae)                                  | -1.48 | 0.174 | -1    | 0.989 | -1.3  | 0.654 | 2.85  | 0.127 | -0.23 |
| 1446409_at   | Gtdc1         | glycosyltransferase-like domain containing 1                                      | -2.18 | 0.21  | -1.37 | 0.379 | 1.25  | 0.554 | -1.01 | 0.978 | -0.83 |
| 1417508_at   | Rnf19         | ring finger protein (C3HC4 type) 19                                               | -1.22 | 0.027 | -1.19 | 0.082 | -1.28 | 0.016 | 1.66  | 0.284 | -0.51 |
| 1424219_at   | Mrm1          | mitochondrial rRNA methyltransferase 1 homolog (S. cerevisiae)                    | -1.21 | 0.286 | -1.6  | 0.269 | -1.01 | 0.956 | 2.14  | 0.133 | -0.42 |
| 1435564_at   | C230078M08Rik | RIKEN cDNA C230078M08 gene                                                        | -2.15 | 0.277 | 1.14  | 0.812 | -1.19 | 0.621 | -2.66 | 0.197 | -1.21 |
| 1442452_at   | Als2cr2       | amyotrophic lateral sclerosis 2 (juvenile) chromosome region, candidate 2 (human) | -1.19 | 0.525 | -1.5  | 0.321 | -1.07 | 0.636 | 2.91  | 0.186 | -0.21 |
| 1442481_at   | LOC675578     | hypothetical protein LOC675578                                                    | 1.25  | 0.515 | -3.05 | 0.03  | -1.16 | 0.251 | -1.12 | 0.4   | -1.02 |
| 1459106_at   | ---           | PREDICTED: Mus musculus hypothetical protein LOC622817 (LOC622817), mR            | -1.6  | 0.559 | 1.09  | 0.911 | -1.38 | 0.461 | -1.14 | 0.418 | -0.76 |
| 1429955_at   | 5031434O11Rik | RIKEN cDNA 5031434O11 gene                                                        | -1.23 | 0.705 | -1.63 | 0.407 | 1.02  | 0.931 | -1.08 | 0.742 | -0.73 |
| 1459385_at   | Camsap1l1     | calmodulin regulated spectrin-associated protein 1-like 1                         | -1.17 | 0.772 | -2.49 | 0.187 | 1.18  | 0.684 | -1.11 | 0.803 | -0.9  |
| 1457093_at   | Gapvd1        | GTPase activating protein and VPS9 domains 1                                      | -1.3  | 0.152 | -1.28 | 0.191 | -1.12 | 0.373 | 1.1   | 0.394 | -0.65 |
| 1427042_at   | Mal2          | mal, T-cell differentiation protein 2                                             | -1.19 | 0.305 | -1.21 | 0.282 | -1.3  | 0.037 | 1.58  | 0.622 | -0.53 |
| 1454272_at   | 9630015K15Rik | RIKEN cDNA 9630015K15 gene                                                        | -3.62 | 0.279 | 1.29  | 0.633 | -1.14 | 0.808 | -1.88 | 0.024 | -1.34 |

|              |                     |                                                                                               |       |       |       |       |       |       |       |       |       |
|--------------|---------------------|-----------------------------------------------------------------------------------------------|-------|-------|-------|-------|-------|-------|-------|-------|-------|
| 1444541_at   | Myo9a               | Myosin IXa                                                                                    | -1.47 | 0.009 | -1.01 | 0.945 | -1.29 | 0.028 | 1.17  | 0.15  | -0.65 |
| 1441704_at   | Plekha5             | Pleckstrin homology domain containing, family A member 5                                      | -1.2  | 0.664 | 1.11  | 0.818 | -2    | 0.019 | -1.58 | 0.323 | -0.92 |
| 1447468_at   | ---                 | Transcribed locus                                                                             | -1.35 | 0.638 | 1.3   | 0.545 | -2.51 | 0.19  | -1.43 | 0.657 | -1    |
| 1454262_at   | 1700124P09Rik       | RIKEN cDNA 1700124P09 gene                                                                    | -1.62 | 0.186 | -1.13 | 0.752 | -1.06 | 0.739 | 1.1   | 0.637 | -0.68 |
| 1431184_a_at | 4930503B20Rik       | RIKEN cDNA 4930503B20 gene                                                                    | -1.24 | 0.681 | -1.62 | 0.133 | 1.02  | 0.976 | -1.54 | 0.415 | -0.85 |
| 1429647_at   | 1700027L20Rik       | RIKEN cDNA 1700027L20 gene                                                                    | 1.46  | 0.611 | -1.79 | 0.272 | -2.37 | 0.044 | -1.71 | 0.373 | -1.1  |
| 1438788_at   | D5Wsu152e           | DNA segment, Chr 5, Wayne State University 152, expressed                                     | 1.02  | 0.747 | -1.36 | 0.087 | -1.47 | 0.043 | -1.32 | 0.197 | -0.78 |
| 1432221_at   | 5330417H12Rik       | RIKEN cDNA 5330417H12 gene                                                                    | -1.5  | 0.421 | -1.09 | 0.799 | -1.16 | 0.665 | 1.75  | 0.241 | -0.5  |
| 1441149_at   | ---                 | ---                                                                                           | 1.3   | 0.052 | -1.38 | 0.42  | -2.41 | 0.023 | -1.41 | 0.682 | -0.97 |
| 1441035_at   | Kcne1               | potassium voltage-gated channel, Isk-related subfamily, member 1                              | -2.12 | 0.04  | 1.26  | 0.673 | -1.4  | 0.134 | -1.22 | 0.138 | -0.87 |
| 1458239_at   | ---                 | ---                                                                                           | -1.24 | 0.543 | -1.29 | 0.592 | -1.16 | 0.379 | 1.35  | 0.281 | -0.59 |
| 1453539_at   | Alkbh8              | alkB, alkylation repair homolog 8 (E. coli)                                                   | -1.09 | 0.562 | -1.72 | 0.31  | -1.06 | 0.723 | 1.35  | 0.59  | -0.63 |
| 1416970_a_at | Cox7a2              | cytochrome c oxidase, subunit VIIa 2                                                          | -1.14 | 0.004 | -1.26 | 0.081 | -1.29 | 0     | 1.03  | 0.728 | -0.66 |
| 1447760_x_at | Ehf                 | ets homologous factor                                                                         | 1.02  | 0.968 | -1.22 | 0.149 | -1.64 | 0.376 | -1.82 | 0.164 | -0.92 |
| 1458470_at   | ---                 | ---                                                                                           | 1.04  | 0.945 | -1.59 | 0.398 | -1.29 | 0.114 | -1.28 | 0.357 | -0.78 |
| 1442681_at   | Tsen2               | TRNA splicing endonuclease 2 homolog (SEN2, S. cerevisiae)                                    | -1.26 | 0.351 | -1.22 | 0.616 | -1.2  | 0.384 | 1.35  | 0.245 | -0.58 |
| 1431809_at   | 4932442L08Rik       | RIKEN cDNA 4932442L08 gene                                                                    | -1.01 | 0.979 | -1.27 | 0.667 | -1.5  | 0.409 | 1.6   | 0.242 | -0.55 |
| 1420968_at   | Btbd14b             | BTB (POZ) domain containing 14B                                                               | -1.12 | 0.884 | -1.73 | 0.005 | -1.03 | 0.943 | 1.45  | 0.451 | -0.61 |
| 1459656_at   | ---                 | PREDICTED: Mus musculus similar to potassium voltage-gated channel, subfam                    | 1.39  | 0.689 | -2.14 | 0.191 | -1.71 | 0.264 | -2.27 | 0.135 | -1.18 |
| 1445530_at   | 5330401P04Rik       | RIKEN cDNA 5330401P04 gene                                                                    | -1.32 | 0.541 | 1.2   | 0.242 | -2.03 | 0.292 | -1.4  | 0.413 | -0.89 |
| 1445910_at   | C79999              | expressed sequence C79999                                                                     | -1.17 | 0.591 | -1.33 | 0.507 | -1.2  | 0.547 | 1.08  | 0.734 | -0.65 |
| 1440101_at   | ---                 | ---                                                                                           | -1.3  | 0.02  | -1.19 | 0.723 | -1.2  | 0.698 | 2.01  | 0.164 | -0.42 |
| 1427276_at   | Smc4                | structural maintenance of chromosomes 4                                                       | -1.23 | 0.167 | -1.14 | 0.506 | -1.32 | 0.126 | 1.72  | 0.353 | -0.49 |
| 1456138_at   | Lypd6               | LY6/PLAUR domain containing 6                                                                 | -1.02 | 0.821 | -1.74 | 0.312 | -1.13 | 0.552 | 1.14  | 0.537 | -0.69 |
| 1426408_at   | Cugbp1              | CUG triplet repeat, RNA binding protein 1                                                     | -1.1  | 0.123 | -1.3  | 0.104 | -1.3  | 0.134 | 1.2   | 0.461 | -0.63 |
| 1443185_at   | Lhfp12              | lipoma HMGIC fusion partner-like 2                                                            | -1.33 | 0.071 | 1.07  | 0.863 | -1.61 | 0.102 | -2.19 | 0.145 | -1.02 |
| 1459683_at   | LOC218695           | similar to spermatogenic cell-specific gene 2                                                 | -2.26 | 0.174 | 1.26  | 0.587 | -1.35 | 0.364 | -1.1  | 0.814 | -0.86 |
| 1437801_at   | Morf4l1 /// LOC4331 | mortality factor 4 like 1 /// similar to mortality factor 4 like 1 isoform b /// similar to 1 | -1.04 | 0.806 | -1.27 | 0.224 | -1.43 | 0.319 | 1.02  | 0.856 | -0.68 |
| 1442949_at   | Nfk1                | Nuclear factor of kappa light chain gene enhancer in B-cells 1, p105                          | -1.41 | 0.366 | -1.39 | 0.419 | 1.02  | 0.948 | -1.96 | 0.466 | -0.94 |
| 1450365_at   | Myoz3               | myozenin 3                                                                                    | -1.19 | 0.724 | -1.63 | 0.438 | -1.01 | 0.989 | 1.6   | 0.123 | -0.56 |
| 1444110_at   | Tcn2                | transcobalamin 2                                                                              | -1.58 | 0.183 | 1.16  | 0.339 | -1.54 | 0.188 | -1.36 | 0.092 | -0.83 |
| 1420405_at   | Slco1a4             | solute carrier organic anion transporter family, member 1a4                                   | -1.04 | 0.9   | -1.85 | 0.126 | -1.06 | 0.796 | 1.54  | 0.143 | -0.6  |
| 1434962_x_at | Ccl27               | chemokine (C-C motif) ligand 27                                                               | -1.18 | 0.035 | -1.2  | 0.497 | -1.31 | 0.031 | 1.09  | 0.529 | -0.65 |
| 1426270_at   | Smc5                | structural maintenance of chromosomes 5                                                       | -1.55 | 0.111 | -1.06 | 0.661 | -1.17 | 0.397 | 1.23  | 0.283 | -0.64 |
| 1443953_at   | Tex2                | testis expressed gene 2                                                                       | -1.25 | 0.473 | -1.19 | 0.16  | -1.24 | 0.014 | 1.13  | 0.329 | -0.64 |
| 1449637_at   | Cdh4                | cadherin 4                                                                                    | -1.7  | 0.557 | 1.32  | 0.692 | -1.87 | 0.345 | -1.39 | 0.287 | -0.91 |
| 1446735_at   | Itsn2               | intersectin 2                                                                                 | 1.08  | 0.223 | -1.25 | 0.301 | -1.76 | 0.01  | -1.81 | 0.074 | -0.94 |
| 1438492_at   | Socs7               | Suppressor of cytokine signaling 7                                                            | -1.72 | 0.432 | -1.12 | 0.8   | -1.03 | 0.945 | 2.32  | 0.054 | -0.39 |
| 1430109_at   | 4833412E19Rik       | RIKEN cDNA 4833412E19 gene                                                                    | -1.18 | 0.369 | -1.06 | 0.764 | -1.51 | 0.11  | 1.82  | 0.154 | -0.48 |
| 1439093_at   | ---                 | ---                                                                                           | -1.46 | 0.049 | -1.05 | 0.751 | -1.23 | 0.224 | 2.1   | 0.301 | -0.41 |
| 1454835_at   | Epm2aip1            | EPM2A (laforin) interacting protein 1                                                         | -1.23 | 0.077 | -1.17 | 0.287 | -1.28 | 0.224 | 1.01  | 0.973 | -0.67 |
| 1425540_at   | Otc                 | ornithine transcarbamylase                                                                    | -1.18 | 0.706 | -1.33 | 0.144 | -1.18 | 0.702 | 1.9   | 0.434 | -0.45 |
| 1439917_at   | Pdzd8               | PDZ domain containing 8                                                                       | 1.08  | 0.597 | -1.39 | 0.091 | -1.54 | 0.048 | -1.29 | 0.113 | -0.78 |
| 1432726_at   | Psm11               | proteasome (prosome, macropain) 26S subunit, non-ATPase, 11                                   | -1.02 | 0.975 | -3.69 | 0.015 | 1.19  | 0.682 | -1.54 | 0.446 | -1.26 |
| 1453411_at   | 2010110K16Rik       | RIKEN cDNA 2010110K16 gene                                                                    | -1.29 | 0.078 | 1.26  | 0.531 | -2.42 | 0.13  | -1.26 | 0.472 | -0.93 |
| 1452109_at   | Il17re              | interleukin 17 receptor E                                                                     | -1.13 | 0.635 | -2.1  | 0.069 | 1.08  | 0.616 | -1.03 | 0.885 | -0.79 |
| 1447593_x_at | Gnaq                | guanine nucleotide binding protein, alpha q polypeptide                                       | -1.43 | 0.637 | 1.03  | 0.938 | -1.39 | 0.224 | -1.66 | 0.349 | -0.86 |
| 1445157_at   | ---                 | ---                                                                                           | -1.29 | 0.745 | -1.2  | 0.273 | -1.2  | 0.59  | 1.02  | 0.948 | -0.67 |
| 1443157_at   | Glis3               | GLIS family zinc finger 3                                                                     | -1.55 | 0.271 | 1.25  | 0.486 | -1.81 | 0.008 | -1.08 | 0.538 | -0.8  |
| 1458613_at   | Arrdc1              | arrestin domain containing 1                                                                  | 1.06  | 0.525 | -1.26 | 0.489 | -1.69 | 0.176 | -1.28 | 0.552 | -0.79 |
| 1450496_a_at | 2810433K01Rik       | RIKEN cDNA 2810433K01 gene                                                                    | -1.07 | 0.931 | -1.95 | 0.452 | -1    | 0.999 | 4.53  | 0.209 | 0.13  |
| 1424364_a_at | 1110020P15Rik       | RIKEN cDNA 1110020P15 gene                                                                    | -1.18 | 0.011 | -1.29 | 0.074 | -1.21 | 0.234 | 1.33  | 0.119 | -0.59 |
| 1416265_at   | Capn10              | calpain 10                                                                                    | -1.22 | 0.271 | -1.38 | 0.295 | -1.11 | 0.414 | 1.01  | 0.919 | -0.67 |

|              |                    |                                                                              |       |       |       |       |       |       |       |       |       |
|--------------|--------------------|------------------------------------------------------------------------------|-------|-------|-------|-------|-------|-------|-------|-------|-------|
| 1451934_at   | H2-D1              | histocompatibility 2, D region locus 1                                       | -1.21 | 0.637 | -1.16 | 0.772 | -1.31 | 0.13  | 1.31  | 0.698 | -0.59 |
| 1443249_at   | 3-Mar              | Membrane-associated ring finger (C3HC4) 3                                    | -1.08 | 0.747 | -1.08 | 0.85  | -1.67 | 0.018 | 3.85  | 0.224 | 0     |
| 1439696_at   | Nr2c2              | nuclear receptor subfamily 2, group C, member 2                              | -1.43 | 0.419 | 1.15  | 0.724 | -1.65 | 0.041 | -1.44 | 0.475 | -0.85 |
| 1456258_at   | Emx2               | empty spiracles homolog 2 (Drosophila)                                       | -1.12 | 0.428 | 1.09  | 0.872 | -2.13 | 0.072 | -1.56 | 0.408 | -0.93 |
| 1450109_s_at | Abcc2              | ATP-binding cassette, sub-family C (CFTR/MRP), member 2                      | -1.28 | 0.09  | -1.15 | 0.388 | -1.25 | 0.691 | 2.16  | 0.056 | -0.38 |
| 1460215_at   | Rpo1-4             | RNA polymerase 1-4                                                           | -1.06 | 0.24  | -1.31 | 0.753 | -1.35 | 0.355 | 1.05  | 0.836 | -0.67 |
| 1440460_at   | 4930504O13Rik      | RIKEN cDNA 4930504O13 gene                                                   | -1.97 | 0.022 | -1.1  | 0.599 | 1.03  | 0.856 | -1.15 | 0.296 | -0.8  |
| 1455982_at   | Jmjd4              | jumonji domain containing 4                                                  | -1.37 | 0.351 | -1.4  | 0.296 | 1.01  | 0.954 | -1.09 | 0.736 | -0.72 |
| 1443457_at   | A230055J12Rik      | RIKEN cDNA A230055J12 gene                                                   | 1.04  | 0.931 | -1.23 | 0.704 | -1.68 | 0.144 | -1.11 | 0.722 | -0.75 |
| 1422401_at   | Spr3               | small proline-rich protein 3                                                 | -2.47 | 0.068 | -2.01 | 0.201 | 1.55  | 0.384 | -1.09 | 0.818 | -1.01 |
| 1458951_at   | Vrk1               | vaccinia related kinase 1                                                    | -1.63 | 0.155 | 1.04  | 0.869 | -1.27 | 0.016 | -1.02 | 0.845 | -0.72 |
| 1430034_at   | Cct4               | chaperonin subunit 4 (delta)                                                 | -1.04 | 0.791 | -1.44 | 0.126 | -1.26 | 0.117 | 1.45  | 0.212 | -0.57 |
| 1426113_x_at | Tcra /// A430107P0 | T-cell receptor alpha chain /// RIKEN cDNA A430107P09 gene                   | -1.26 | 0.145 | -1.65 | 0.118 | 1.05  | 0.778 | -2.23 | 0.102 | -1.02 |
| 1459090_at   | Ubx4               | UBX domain containing 4                                                      | -1.2  | 0.617 | -1.3  | 0.536 | -1.18 | 0.37  | 1.03  | 0.609 | -0.66 |
| 1425773_s_at | Nmnat1             | nicotinamide nucleotide adenylyltransferase 1                                | -1.19 | 0.296 | -1.79 | 0.021 | 1.05  | 0.694 | -1.41 | 0.306 | -0.84 |
| 1444659_at   | Trip11             | Thyroid hormone receptor interactor 11                                       | -1.49 | 0.413 | 1.15  | 0.678 | -1.59 | 0.244 | -1.55 | 0.137 | -0.87 |
| 1453424_at   | Fyco1              | FYVE and coiled-coil domain containing 1                                     | 1.03  | 0.791 | -1.34 | 0.017 | -1.47 | 0.109 | -1.49 | 0.077 | -0.82 |
| 1437491_at   | Bicd2              | bicaudal D homolog 2 (Drosophila)                                            | -1.07 | 0.887 | -1.05 | 0.885 | -1.78 | 0.337 | 1.67  | 0.236 | -0.56 |
| 1438254_at   | 1110007A13Rik      | RIKEN cDNA 1110007A13 gene                                                   | -1.45 | 0.059 | 1.09  | 0.383 | -1.48 | 0.013 | -1.31 | 0.087 | -0.79 |
| 1454270_at   | Grfin              | galectin-related inter-fiber protein                                         | -2.26 | 0.018 | -1.03 | 0.951 | 1.04  | 0.921 | -1.55 | 0.067 | -0.95 |
| 1431527_at   | Cd164              | CD164 antigen                                                                | -2.65 | 0.163 | 1.1   | 0.912 | -1.02 | 0.939 | -1.46 | 0.51  | -1.01 |
| 1440943_at   | B230208H17Rik      | RIKEN cDNA B230208H17 gene                                                   | -1.04 | 0.907 | -1.13 | 0.644 | -1.66 | 0.09  | 1.05  | 0.831 | -0.7  |
| 1454393_at   | 2310047C04Rik      | RIKEN cDNA 2310047C04 gene                                                   | -1.21 | 0.466 | 1.2   | 0.696 | -2.35 | 0.064 | -1.26 | 0.141 | -0.9  |
| 1449726_at   | Txn12 /// LOC62001 | thioredoxin-like 2 /// similar to thioredoxin-like 2                         | -1.1  | 0.913 | -1.07 | 0.851 | -1.64 | 0.081 | 1.13  | 0.605 | -0.67 |
| 1446240_at   | Kns2               | Kinesin 2                                                                    | 1.09  | 0.648 | -1.61 | 0.384 | -1.35 | 0.204 | -1.37 | 0.484 | -0.81 |
| 1432369_at   | 3010027C24Rik      | RIKEN cDNA 3010027C24 gene                                                   | -1.31 | 0.483 | -1.39 | 0.361 | -1.04 | 0.947 | 1.02  | 0.94  | -0.68 |
| 1439238_at   | Unc84b             | unc-84 homolog B (C. elegans)                                                | 1.11  | 0.437 | -1.68 | 0.17  | -1.33 | 0.148 | -1.1  | 0.491 | -0.75 |
| 1437594_x_at | Pigt               | phosphatidylinositol glycan anchor biosynthesis, class T                     | -1.27 | 0.649 | -1.58 | 0.174 | 1.03  | 0.732 | -1.23 | 0.532 | -0.76 |
| 1423512_at   | AW209491           | expressed sequence AW209491                                                  | -1.14 | 0.241 | -1.2  | 0.045 | -1.35 | 0.096 | 1.12  | 0.6   | -0.64 |
| 1441301_at   | Jakmip1            | Janus kinase and microtubule interacting protein 1                           | -2.46 | 0.427 | -1.21 | 0.637 | 1.22  | 0.615 | -1.68 | 0.072 | -1.03 |
| 1430016_at   | 4930584F24Rik      | RIKEN cDNA 4930584F24 gene                                                   | -2.61 | 0.332 | 1.23  | 0.555 | -1.2  | 0.655 | -1.61 | 0.458 | -1.05 |
| 1458661_at   | Morf4l1            | Mortality factor 4 like 1                                                    | -1.08 | 0.584 | 1.06  | 0.697 | -2.13 | 0.017 | -1.1  | 0.631 | -0.81 |
| 1437604_x_at | Apccdd1            | adenomatosis polyposis coli down-regulated 1                                 | -1.51 | 0.209 | -1.07 | 0.88  | -1.17 | 0.164 | 1.01  | 0.968 | -0.69 |
| 1430502_at   | 9130206N08Rik      | RIKEN cDNA 9130206N08 gene                                                   | 1.18  | 0.753 | -1.64 | 0.404 | -1.52 | 0.406 | -1.54 | 0.443 | -0.88 |
| 1437474_at   | Gatad2b            | GATA zinc finger domain containing 2B                                        | -1.17 | 0.139 | -1.19 | 0.207 | -1.32 | 0.187 | 1.05  | 0.758 | -0.66 |
| 1444448_at   | 1300007F04Rik      | RIKEN cDNA 1300007F04 gene                                                   | -4.47 | 0.017 | 1.53  | 0.509 | -1.43 | 0.478 | -2.17 | 0.109 | -1.64 |
| 1417233_at   | Chchd4             | coiled-coil-helix-coiled-coil-helix domain containing 4                      | -1.31 | 0.14  | -1.19 | 0.209 | -1.18 | 0.337 | 1.21  | 0.543 | -0.62 |
| 1431246_at   | Iqce               | IQ motif containing E                                                        | -1.31 | 0.04  | -1.27 | 0.568 | -1.11 | 0.73  | 1.12  | 0.194 | -0.64 |
| 1440294_at   | Setd2              | SET domain containing 2                                                      | 1.13  | 0.613 | -1.33 | 0.576 | -1.75 | 0.075 | -1.14 | 0.603 | -0.77 |
| 1433865_at   | E330016L19Rik ///  | RIKEN cDNA E330016L19 gene /// RIKEN cDNA E330010L02 gene                    | 1.2   | 0.83  | -2.09 | 0.098 | -1.3  | 0.531 | -1.4  | 0.489 | -0.9  |
| 1437373_at   | Isg20l1            | interferon stimulated exonuclease gene 20-like 1                             | -1.12 | 0.734 | -1.74 | 0.19  | -1.02 | 0.874 | 1.26  | 0.183 | -0.66 |
| 1435798_a_at | Sfrs14             | splicing factor, arginine/serine-rich 14                                     | -1.44 | 0.4   | -1.42 | 0.071 | 1.05  | 0.186 | -1.13 | 0.047 | -0.73 |
| 1442802_x_at | Bat2               | HLA-B associated transcript 2                                                | -1.31 | 0.501 | -1.03 | 0.926 | -1.4  | 0.044 | 1.03  | 0.729 | -0.68 |
| 1445688_at   | Hcfc1              | host cell factor C1                                                          | 1.24  | 0.425 | -1.65 | 0.433 | -1.64 | 0.415 | -2.04 | 0.254 | -1.02 |
| 1432748_at   | 4933403J19Rik      | RIKEN cDNA 4933403J19 gene                                                   | -2.3  | 0.122 | 1.2   | 0.583 | -1.22 | 0.651 | -1.43 | 0.232 | -0.94 |
| 1432903_at   | ---                | ---                                                                          | 1.08  | 0.677 | -1.15 | 0.626 | -1.96 | 0.372 | -1.91 | 0.452 | -0.99 |
| 1458849_at   | Asah2              | N-acylsphingosine amidohydrolase 2                                           | -1.45 | 0.132 | -1.1  | 0.623 | -1.17 | 0.377 | 1.28  | 0.292 | -0.61 |
| 1425692_a_at | Dnahc8             | dynein, axonemal, heavy chain 8                                              | -1.05 | 0.945 | -1.32 | 0.693 | -1.34 | 0.334 | 1.23  | 0.445 | -0.62 |
| 1434341_x_at | 1110020P15Rik ///  | RIKEN cDNA 1110020P15 gene /// similar to ubiquinol-cytochrome c reductase c | -1.15 | 0.071 | -1.38 | 0.024 | -1.16 | 0.416 | 1.06  | 0.712 | -0.66 |
| 1439020_at   | AW146020           | expressed sequence AW146020                                                  | -1.34 | 0.476 | -1.21 | 0.465 | -1.14 | 0.573 | 1.22  | 0.407 | -0.62 |
| 1429325_at   | Wdr51b             | WD repeat domain 51B                                                         | -1.39 | 0.141 | -1.42 | 0.483 | 1.03  | 0.853 | -1.22 | 0.413 | -0.75 |
| 1455191_x_at | Pip5k1b            | Phosphatidylinositol-4-phosphate 5-kinase, type 1 beta                       | -1.91 | 0.341 | -1.65 | 0.11  | 1.32  | 0.571 | -1.55 | 0.446 | -0.95 |
| 1460476_s_at | 1200015N20Rik      | RIKEN cDNA 1200015N20 gene                                                   | -1.19 | 0.841 | -1.91 | 0.222 | 1.09  | 0.796 | -1.44 | 0.524 | -0.86 |

|              |                   |                                                                                      |       |       |       |       |       |       |       |       |       |
|--------------|-------------------|--------------------------------------------------------------------------------------|-------|-------|-------|-------|-------|-------|-------|-------|-------|
| 1452731_x_at | LOC544988 /// B93 | hypothetical protein LOC544988 /// RIKEN cDNA B930046C15 gene /// hypotheti          | -1.03 | 0.943 | -2.31 | 0.252 | 1.05  | 0.713 | -1.08 | 0.856 | -0.84 |
| 1426063_a_at | Gem               | GTP binding protein (gene overexpressed in skeletal muscle)                          | -1.88 | 0.503 | 1.24  | 0.539 | -1.46 | 0.41  | -1.34 | 0.225 | -0.86 |
| 1438834_at   | Mospd2            | motile sperm domain containing 2                                                     | 1.09  | 0.561 | -1.35 | 0.4   | -1.61 | 0.005 | -1.18 | 0.564 | -0.76 |
| 1448080_at   | E2f8              | E2F transcription factor 8                                                           | -1.14 | 0.882 | -1.6  | 0.062 | -1.05 | 0.892 | 1.3   | 0.736 | -0.62 |
| 1424347_at   | Ppp6c             | protein phosphatase 6, catalytic subunit                                             | -1.12 | 0.254 | -1.1  | 0.127 | -1.53 | 0.009 | 1.14  | 0.183 | -0.65 |
| 1444764_at   | A130022J21Rik     | RIKEN cDNA A130022J21 gene                                                           | -1.14 | 0.612 | 1.02  | 0.945 | -1.79 | 0.15  | -1.05 | 0.887 | -0.74 |
| 1444353_at   | C030040A22Rik     | RIKEN cDNA C030040A22 gene                                                           | -1.25 | 0.671 | -1.27 | 0.67  | -1.15 | 0.664 | 1.04  | 0.953 | -0.66 |
| 1443014_at   | 4833403I15Rik     | RIKEN cDNA 4833403I15 gene                                                           | 1     | 0.99  | -1.13 | 0.737 | -1.76 | 0.282 | -1.44 | 0.44  | -0.83 |
| 1421564_at   | Serpina3c         | serine (or cysteine) peptidase inhibitor, clade A, member 3C                         | 1.14  | 0.831 | -1.97 | 0.222 | -1.24 | 0.411 | -1.47 | 0.317 | -0.89 |
| 1431989_at   | 4930433E13Rik     | RIKEN cDNA 4930433E13 gene                                                           | -1.04 | 0.69  | -1.34 | 0.464 | -1.34 | 0.123 | 1.07  | 0.842 | -0.66 |
| 1441724_at   | ---               | ---                                                                                  | -1.14 | 0.525 | -1.01 | 0.973 | -1.71 | 0.073 | 1.1   | 0.16  | -0.69 |
| 1433207_at   | 5033430J17Rik     | RIKEN cDNA 5033430J17 gene                                                           | -1.85 | 0.116 | 1.46  | 0.581 | -2.19 | 0.09  | -1.31 | 0.237 | -0.97 |
| 1431863_at   | 4931430N09Rik     | RIKEN cDNA 4931430N09 gene                                                           | -1.7  | 0.503 | -1.01 | 0.982 | -1.14 | 0.724 | 1.84  | 0.33  | -0.5  |
| 1446983_at   | Cdc73             | Vcell division cycle 73, Paf1/RNA polymerase II complex component, homolog (S        | 1.02  | 0.938 | -1.35 | 0.574 | -1.45 | 0.081 | -1.26 | 0.716 | -0.76 |
| 1436101_at   | Rnf24             | ring finger protein 24                                                               | -1.69 | 0.004 | 1.01  | 0.979 | -1.17 | 0.345 | -1.07 | 0.755 | -0.73 |
| 1449756_at   | Dnajc17           | DnaJ (Hsp40) homolog, subfamily C, member 17                                         | -2.18 | 0.185 | 1.01  | 0.994 | -1.01 | 0.985 | -1.15 | 0.656 | -0.83 |
| 1447384_at   | Abcc5             | ATP-binding cassette, sub-family C (CFTR/MRP), member 5                              | 1.16  | 0.591 | -1.21 | 0.72  | -2.13 | 0.183 | -1.03 | 0.96  | -0.8  |
| 1439715_at   | Osgepl1           | O-sialoglycoprotein endopeptidase-like 1                                             | 1.18  | 0.483 | -1.48 | 0.384 | -1.67 | 0.407 | -2.47 | 0.103 | -1.11 |
| 1445478_at   | ---               | ---                                                                                  | -1.22 | 0.525 | -1.22 | 0.519 | -1.23 | 0.276 | 1.06  | 0.792 | -0.65 |
| 1422373_at   | Olf171            | olfactory receptor 71                                                                | -1.02 | 0.96  | -1.34 | 0.35  | -1.38 | 0.142 | 2.2   | 0.084 | -0.38 |
| 1455136_at   | Atp1a2            | ATPase, Na+/K+ transporting, alpha 2 polypeptide                                     | -2.75 | 0.089 | -1.15 | 0.795 | 1.22  | 0.619 | -1.07 | 0.93  | -0.94 |
| 1442929_at   | St8sia5           | ST8 alpha-N-acetyl-neuraminide alpha-2,8-sialyltransferase 5                         | -1.57 | 0.369 | 1.06  | 0.827 | -1.31 | 0.618 | -1.04 | 0.941 | -0.72 |
| 1457153_at   | LOC552882         | hypothetical LOC552882                                                               | 1.03  | 0.932 | -1.9  | 0.125 | -1.11 | 0.729 | -1.03 | 0.906 | -0.75 |
| 1432083_a_at | Lrrc23            | leucine rich repeat containing 23                                                    | -1.84 | 0.436 | -1.2  | 0.821 | 1.08  | 0.81  | -1.64 | 0.11  | -0.9  |
| 1434817_s_at | 4930535B03Rik     | RIKEN cDNA 4930535B03 gene                                                           | -1.28 | 0.101 | -1.46 | 0.029 | -1.01 | 0.943 | 1.33  | 0.259 | -0.6  |
| 1435588_at   | Wdfy1             | WD repeat and FYVE domain containing 1                                               | -1.4  | 0.39  | -1.27 | 0.36  | -1.05 | 0.823 | 1.04  | 0.892 | -0.67 |
| 1442809_at   | Scn9a /// LOC6718 | sodium channel, voltage-gated, type IX, alpha /// similar to sodium channel 25       | 1.05  | 0.936 | -1.05 | 0.945 | -2.24 | 0.233 | -1.16 | 0.794 | -0.85 |
| 1438818_at   | Nmd3              | NMD3 homolog (S. cerevisiae)                                                         | -1.47 | 0.558 | 1.08  | 0.79  | -1.44 | 0.033 | -1.48 | 0.404 | -0.83 |
| 1416225_at   | Adh1              | alcohol dehydrogenase 1 (class I)                                                    | -1.03 | 0.676 | -1.22 | 0.376 | -1.5  | 0.126 | 1.36  | 0.632 | -0.6  |
| 1438292_x_at | Adk               | adenosine kinase                                                                     | -1.04 | 0.235 | -1.1  | 0.548 | -1.71 | 0.008 | 1.89  | 0.083 | -0.49 |
| 1443005_at   | Zfhx1a            | zinc finger homeobox 1a                                                              | -1.37 | 0.193 | -1.16 | 0.49  | -1.15 | 0.371 | 1.06  | 0.788 | -0.66 |
| 1457120_at   | Itk               | IL2-inducible T-cell kinase                                                          | -2.05 | 0.528 | 1.12  | 0.85  | -1.17 | 0.568 | -2.42 | 0.116 | -1.13 |
| 1442045_at   | ---               | ---                                                                                  | -1.73 | 0.589 | 1.11  | 0.877 | -1.29 | 0.448 | -1.3  | 0.159 | -0.8  |
| 1418303_at   | 1700113O17Rik     | RIKEN cDNA 1700113O17 gene                                                           | -1.84 | 0.386 | -1.05 | 0.913 | -1.04 | 0.818 | 2.72  | 0.034 | -0.3  |
| 1457954_at   | ---               | ---                                                                                  | 1.07  | 0.801 | -2.08 | 0.184 | -1.1  | 0.748 | -1.22 | 0.416 | -0.83 |
| 1460354_a_at | Mrp13             | mitochondrial ribosomal protein L13                                                  | -1.15 | 0.264 | -1.12 | 0.348 | -1.45 | 0.072 | 1.02  | 0.921 | -0.67 |
| 1451699_at   | LOC668468 /// LOC | similar to putative retrovirus-related gag protein /// hypothetical protein LOC66863 | -1.67 | 0.29  | -1.1  | 0.771 | -1.05 | 0.835 | 1.9   | 0.098 | -0.48 |
| 1441431_at   | 1700041C02Rik     | RIKEN cDNA 1700041C02 gene                                                           | -1.44 | 0.458 | -1.17 | 0.682 | -1.1  | 0.711 | 1.02  | 0.94  | -0.67 |
| 1442394_at   | ---               | 0 day neonate thymus cDNA, RIKEN full-length enriched library, clone:A430024H        | 1.37  | 0.496 | -2.08 | 0.049 | -1.65 | 0.147 | -1.87 | 0.253 | -1.06 |
| 1441043_at   | ---               | Adult male testis cDNA, RIKEN full-length enriched library, clone:4930579G14 pr      | 1.16  | 0.551 | -2.51 | 0.051 | -1.12 | 0.802 | -1.24 | 0.624 | -0.93 |
| 1415916_a_at | Mthfd1            | methylenetetrahydrofolate dehydrogenase (NADP+ dependent), methenyltetrahy           | -1.23 | 0.037 | -1.13 | 0.366 | -1.32 | 0.043 | 2.36  | 0.15  | -0.33 |
| 1417996_at   | Ngb               | neuroglobin                                                                          | 1.03  | 0.971 | -1.48 | 0.35  | -1.32 | 0.296 | -1.95 | 0.041 | -0.93 |
| 1421132_at   | Pvrl3             | poliovirus receptor-related 3                                                        | 1.04  | 0.848 | -1.37 | 0.352 | -1.45 | 0.1   | -2.46 | 0.222 | -1.06 |
| 1431849_at   | 4933432B09Rik     | RIKEN cDNA 4933432B09 gene                                                           | 1.1   | 0.893 | -2.45 | 0.204 | -1.05 | 0.619 | -2.16 | 0.357 | -1.14 |
| 1424968_at   | 2210023G05Rik     | RIKEN cDNA 2210023G05 gene                                                           | -1.14 | 0.734 | -1.15 | 0.319 | -1.41 | 0.061 | 4.3   | 0.18  | 0.15  |
| 1433365_at   | 4930563N14Rik     | RIKEN cDNA 4930563N14 gene                                                           | 1.19  | 0.228 | -1.46 | 0.672 | -1.71 | 0.352 | -1.02 | 0.98  | -0.75 |
| 1420154_at   | ---               | ---                                                                                  | -1.13 | 0.579 | -1.09 | 0.869 | -1.54 | 0.477 | 1.09  | 0.722 | -0.67 |
| 1418739_at   | Sgk2              | serum/glucocorticoid regulated kinase 2                                              | -1.15 | 0.315 | -1.52 | 0.189 | -1.07 | 0.827 | 1.12  | 0.225 | -0.66 |
| 1435091_at   | Zfp568            | zinc finger protein 568                                                              | -1.35 | 0.132 | -1.17 | 0.106 | -1.16 | 0.203 | 1.25  | 0.34  | -0.61 |
| 1429581_at   | Acad9             | acyl-Coenzyme A dehydrogenase family, member 9                                       | -1.38 | 0.233 | -1.54 | 0.071 | 1.08  | 0.686 | -1.3  | 0.244 | -0.78 |
| 1443081_at   | Gata6             | GATA binding protein 6                                                               | 1.07  | 0.916 | -1.14 | 0.832 | -1.95 | 0.026 | -1.39 | 0.156 | -0.85 |
| 1441273_at   | Lrch2             | Leucine-rich repeats and calponin homology (CH) domain containing 2                  | -2.75 | 0.365 | -2.61 | 0.191 | 1.71  | 0.121 | -1.97 | 0.078 | -1.4  |
| 1420348_at   | Lhx5              | LIM homeobox protein 5                                                               | -1.12 | 0.783 | -2.45 | 0.099 | 1.16  | 0.717 | -1.44 | 0.313 | -0.96 |

|              |                |                                                                                    |       |       |       |       |       |       |       |       |       |
|--------------|----------------|------------------------------------------------------------------------------------|-------|-------|-------|-------|-------|-------|-------|-------|-------|
| 1446801_at   | ---            | ---                                                                                | -1.7  | 0.241 | 1.34  | 0.363 | -1.89 | 0.185 | -1.52 | 0.61  | -0.94 |
| 1444598_at   | Etv6           | Ets variant gene 6 (TEL oncogene)                                                  | 1.02  | 0.939 | -1.23 | 0.357 | -1.6  | 0.062 | -1.65 | 0.257 | -0.86 |
| 1441873_at   | Prp1e          | prolactin-like protein E                                                           | 1.31  | 0.585 | -1.39 | 0.637 | -2.35 | 0.358 | -2.08 | 0.477 | -1.13 |
| 1431094_at   | 1110006E14Rik  | RIKEN cDNA 1110006E14 gene                                                         | -1.1  | 0.877 | -1.01 | 0.986 | -1.79 | 0.005 | 1.74  | 0.217 | -0.54 |
| 1417848_at   | Zfp704         | zinc finger protein 704                                                            | -1.18 | 0.262 | -1.06 | 0.761 | -1.5  | 0.021 | 1.13  | 0.418 | -0.65 |
| 1439088_at   | Pdzd8          | PDZ domain containing 8                                                            | -1.15 | 0.607 | -1.19 | 0.497 | -1.34 | 0.055 | 1.09  | 0.744 | -0.65 |
| 1436731_at   | Zfp533         | zinc finger protein 533                                                            | -1.09 | 0.721 | -1.24 | 0.327 | -1.36 | 0.407 | 1.07  | 0.881 | -0.66 |
| 1442421_at   | ---            | ---                                                                                | -1.51 | 0.195 | -1.07 | 0.844 | -1.15 | 0.687 | 1.19  | 0.604 | -0.64 |
| 1420044_at   | ---            | ---                                                                                | -1.35 | 0.317 | -1.46 | 0.015 | 1.03  | 0.854 | -1.41 | 0.157 | -0.8  |
| 1439659_at   | Trfp /// Usp49 | Trf (TATA binding protein-related factor)-proximal protein homolog (Drosophila) // | -1.06 | 0.808 | -1.54 | 0.028 | -1.15 | 0.389 | 1.69  | 0.142 | -0.52 |
| 1455864_at   | Trim75         | tripartite motif-containing 75                                                     | -1.23 | 0.703 | 1.26  | 0.753 | -2.59 | 0.129 | -1.23 | 0.664 | -0.95 |
| 1429540_at   | Cnfn           | cornifelin                                                                         | -1.11 | 0.661 | -1.23 | 0.615 | -1.35 | 0.123 | 1.18  | 0.584 | -0.63 |
| 1432186_at   | 1700028J19Rik  | RIKEN cDNA 1700028J19 gene                                                         | 1.4   | 0.253 | -1.98 | 0.214 | -1.81 | 0.251 | -1.16 | 0.853 | -0.89 |
| 1445957_at   | Evl            | Ena-vasodilator stimulated phosphoprotein                                          | -1.03 | 0.906 | -1.65 | 0.236 | -1.14 | 0.557 | 1.25  | 0.631 | -0.64 |
| 1457053_at   | BC016423       | CDNA sequence BC016423                                                             | 1.01  | 0.91  | -1.32 | 0.31  | -1.45 | 0.318 | -1.25 | 0.308 | -0.75 |
| 1455866_x_at | Txn1           | thioredoxin-like 1                                                                 | -1.61 | 0.039 | -1.71 | 0.061 | 1.25  | 0.646 | -2.18 | 0.185 | -1.06 |
| 1431211_s_at | Them5          | thioesterase superfamily member 5                                                  | -2.51 | 0.054 | 1.08  | 0.936 | -1.02 | 0.972 | -1.74 | 0.453 | -1.05 |
| 1454502_at   | 2900022B07Rik  | RIKEN cDNA 2900022B07 gene                                                         | -1.86 | 0.048 | -1.01 | 0.98  | -1.07 | 0.765 | 1.62  | 0.291 | -0.58 |
| 1450139_at   | Ern2           | endoplasmic reticulum (ER) to nucleus signalling 2                                 | -1.78 | 0.358 | 1.54  | 0.329 | -2.79 | 0.015 | -1.63 | 0.433 | -1.17 |
| 1439333_at   | Kcnv1          | potassium channel, subfamily V, member 1                                           | -2.58 | 0.281 | 1.67  | 0.46  | -2.49 | 0.022 | -1.9  | 0.117 | -1.33 |
| 1421050_at   | Vps25          | vacuolar protein sorting 25 (yeast)                                                | -1.1  | 0.55  | -1.38 | 0.338 | -1.21 | 0.359 | 1.13  | 0.546 | -0.64 |
| 1423753_at   | Bambi          | BMP and activin membrane-bound inhibitor, homolog (Xenopus laevis)                 | -1.2  | 0.207 | 1.07  | 0.653 | -1.8  | 0.002 | -1.46 | 0.031 | -0.85 |
| 1435961_at   | BC047219       | cDNA sequence BC047219                                                             | -1.07 | 0.858 | -1.93 | 0.162 | 1     | 0.974 | -1.82 | 0.044 | -0.95 |
| 1453620_at   | 3010022N24Rik  | RIKEN cDNA 3010022N24 gene                                                         | -2.22 | 0.111 | -1.46 | 0.419 | 1.32  | 0.497 | -1.01 | 0.989 | -0.84 |
| 1456202_at   | BC094219       | cDNA sequence BC094219                                                             | -2.73 | 0.495 | 1.29  | 0.58  | -1.25 | 0.721 | -5.27 | 0.05  | -1.99 |
| 1442155_at   | 4632427E13Rik  | RIKEN cDNA 4632427E13 gene                                                         | 1.12  | 0.622 | -1.11 | 0.581 | -2.26 | 0.002 | -1.25 | 0.164 | -0.87 |
| 1442887_at   | AI853363       | expressed sequence AI853363                                                        | -1.17 | 0.746 | -1.29 | 0.39  | -1.21 | 0.74  | 1.67  | 0.48  | -0.5  |
| 1440019_at   | Gpr22          | G protein-coupled receptor 22                                                      | -1.44 | 0.695 | 1.26  | 0.438 | -1.97 | 0.072 | -1.41 | 0.586 | -0.89 |
| 1453652_at   | 4933400F21Rik  | RIKEN cDNA 4933400F21 gene                                                         | -1.33 | 0.66  | -2.07 | 0.29  | 1.22  | 0.582 | -1.74 | 0.128 | -0.98 |
| 1416014_at   | Abce1          | ATP-binding cassette, sub-family E (OABP), member 1                                | -1.16 | 0.516 | -1.25 | 0.178 | -1.25 | 0.118 | 1.17  | 0.406 | -0.62 |
| 1435006_s_at | Abcb7          | ATP-binding cassette, sub-family B (MDR/TAP), member 7                             | -1.32 | 0.013 | -1.18 | 0.106 | -1.17 | 0.226 | 1.47  | 0.095 | -0.55 |
| 1428411_at   | 1700020I14Rik  | RIKEN cDNA 1700020I14 gene                                                         | -1.14 | 0.009 | -1.11 | 0.388 | -1.46 | 0.054 | 1.08  | 0.553 | -0.66 |
| 1454466_at   | 4933407I18Rik  | RIKEN cDNA 4933407I18 gene                                                         | 1.09  | 0.924 | -2.34 | 0.424 | -1.06 | 0.886 | -1.13 | 0.832 | -0.86 |
| 1446922_at   | ---            | ---                                                                                | -2.01 | 0.124 | -1.13 | 0.439 | 1.08  | 0.847 | -1.33 | 0.434 | -0.85 |
| 1419894_at   | MGC107702      | Similar to proteasome (prosome, macropain) subunit, beta type 7                    | 1.19  | 0.793 | -1.66 | 0.175 | -1.5  | 0.086 | -1.06 | 0.717 | -0.76 |
| 1450800_at   | Syt8           | synaptotagmin VIII                                                                 | -1.86 | 0.582 | 1.04  | 0.928 | -1.13 | 0.86  | -1.89 | 0.335 | -0.96 |
| 1450415_at   | Pde6a          | phosphodiesterase 6A, cGMP-specific, rod, alpha                                    | 1.01  | 0.981 | -1.62 | 0.311 | -1.21 | 0.7   | -1.16 | 0.845 | -0.74 |
| 1452751_at   | Ebf3           | early B-cell factor 3                                                              | -1.04 | 0.466 | -1.39 | 0.635 | -1.29 | 0.609 | 1.33  | 0.378 | -0.6  |
| 1420103_at   | ---            | ---                                                                                | -1.78 | 0.114 | -1.11 | 0.761 | -1    | 0.983 | 1.5   | 0.13  | -0.6  |
| 1447022_at   | ---            | Adult male testis cDNA, RIKEN full-length enriched library, clone:4930402K03 prc   | 1.04  | 0.888 | -1.76 | 0.501 | -1.17 | 0.355 | -1.42 | 0.105 | -0.83 |
| 1444493_at   | Tbc1d2b        | TBC1 domain family, member 2B                                                      | -1.09 | 0.753 | -1.73 | 0.056 | -1.03 | 0.857 | 1.01  | 0.958 | -0.71 |
| 1459136_at   | Bach2          | BTB and CNC homology 2                                                             | 1.05  | 0.879 | -1.38 | 0.528 | -1.47 | 0.271 | -2.93 | 0.217 | -1.18 |
| 1420031_at   | Chek1          | checkpoint kinase 1 homolog (S. pombe)                                             | 1.26  | 0.723 | -1.25 | 0.738 | -2.46 | 0.067 | -1.9  | 0.359 | -1.09 |
| 1419937_at   | AA536749       | expressed sequence AA536749                                                        | 1.25  | 0.66  | -1.76 | 0.156 | -1.56 | 0.302 | -1.66 | 0.051 | -0.93 |
| 1445526_at   | AY512915       | cDNA sequence AY512915                                                             | -2.14 | 0.253 | 1.13  | 0.797 | -1.16 | 0.123 | -1.26 | 0.411 | -0.86 |
| 1454126_at   | 0710001A04Rik  | RIKEN cDNA 0710001A04 gene                                                         | -1.2  | 0.637 | -1.38 | 0.171 | -1.1  | 0.866 | 1.9   | 0.155 | -0.45 |
| 1428266_at   | Myl3           | myosin, light polypeptide 3                                                        | -1.67 | 0.318 | -1.76 | 0.131 | 1.3   | 0.527 | -1.12 | 0.619 | -0.81 |
| 1453551_at   | Polq           | polymerase (DNA directed), theta                                                   | -1.65 | 0.032 | -1.04 | 0.918 | -1.12 | 0.763 | 1.24  | 0.601 | -0.64 |
| 1439805_at   | Nfat5          | Nuclear factor of activated T-cells 5                                              | 1.11  | 0.122 | -1.36 | 0.313 | -1.61 | 0.007 | -1.45 | 0.105 | -0.83 |
| 1447124_at   | ---            | Transcribed locus                                                                  | -1.26 | 0.145 | -1.27 | 0.105 | -1.13 | 0.528 | 1.08  | 0.867 | -0.65 |
| 1419924_at   | A730024A03Rik  | RIKEN cDNA A730024A03 gene                                                         | -1.25 | 0.747 | -1.95 | 0.071 | 1.15  | 0.59  | -1.24 | 0.26  | -0.82 |
| 1423511_at   | Asf1a          | ASF1 anti-silencing function 1 homolog A (S. cerevisiae)                           | -1.26 | 0.064 | -1.13 | 0.343 | -1.28 | 0.022 | 1.59  | 0.269 | -0.52 |
| 1433300_at   | 2900005I04Rik  | RIKEN cDNA 2900005I04 gene                                                         | -1.52 | 0.21  | -3.34 | 0.127 | 1.5   | 0.632 | -1.71 | 0.255 | -1.27 |

|              |                    |                                                                                            |       |       |       |       |       |       |       |       |       |
|--------------|--------------------|--------------------------------------------------------------------------------------------|-------|-------|-------|-------|-------|-------|-------|-------|-------|
| 1436871_at   | Sfrs7              | splicing factor, arginine/serine-rich 7                                                    | -1.63 | 0.261 | -1.22 | 0.301 | 1.03  | 0.78  | -1.23 | 0.597 | -0.76 |
| 1418953_at   | Fbxo16             | F-box protein 16                                                                           | -1.4  | 0.142 | -1.62 | 0.074 | 1.13  | 0.473 | -1.05 | 0.872 | -0.74 |
| 1419478_at   | Sectm1             | secreted and transmembrane 1                                                               | 1.08  | 0.664 | -1.79 | 0.191 | -1.21 | 0.558 | -2.58 | 0.236 | -1.13 |
| 1419067_a_at | Rabgef1            | RAB guanine nucleotide exchange factor (GEF) 1                                             | -1.14 | 0.305 | -1.35 | 0.159 | -1.19 | 0.124 | 1.6   | 0.164 | -0.52 |
| 1444947_at   | Lasp1              | LIM and SH3 protein 1                                                                      | -1.25 | 0.383 | -1.57 | 0.149 | 1.03  | 0.902 | -1.26 | 0.381 | -0.76 |
| 1424417_at   | ---                | ---                                                                                        | -1.41 | 0.146 | -1.19 | 0.542 | -1.09 | 0.748 | 1.02  | 0.856 | -0.67 |
| 1443392_at   | Trpv1              | Transient receptor potential cation channel, subfamily V, member 1                         | -1.46 | 0.354 | -1.19 | 0.637 | -1.07 | 0.763 | 1.35  | 0.621 | -0.59 |
| 1458222_at   | ---                | Transcribed locus                                                                          | -1.44 | 0.105 | -1.15 | 0.485 | -1.11 | 0.373 | 1.03  | 0.903 | -0.67 |
| 1419628_at   | Chx10              | C. elegans ceh-10 homeo domain containing homolog                                          | -1.35 | 0.186 | -1.67 | 0.223 | 1.13  | 0.705 | -1.01 | 0.963 | -0.73 |
| 1455992_at   | Vgll4              | vestigial like 4 (Drosophila)                                                              | -1.45 | 0.082 | -1.65 | 0.07  | 1.17  | 0.573 | -1.32 | 0.088 | -0.81 |
| 1440672_at   | LOC638394 /// LOC  | similar to zinc finger protein 541 /// similar to zinc finger protein 541 /// similar to z | -1.34 | 0.564 | -1.47 | 0.669 | 1.04  | 0.811 | -1.05 | 0.954 | -0.71 |
| 1457029_at   | C030010B13Rik      | RIKEN cDNA C030010B13 gene                                                                 | -1.13 | 0.405 | -1.9  | 0.142 | 1.06  | 0.865 | -1.08 | 0.864 | -0.77 |
| 1422986_at   | Esrrb              | estrogen related receptor, beta                                                            | -1.11 | 0.811 | -1.59 | 0.205 | -1.07 | 0.738 | 1.4   | 0.125 | -0.59 |
| 1436755_at   | Itih5              | inter-alpha (globulin) inhibitor H5                                                        | 1.17  | 0.659 | -1.81 | 0.078 | -1.34 | 0.449 | -1.73 | 0.324 | -0.93 |
| 1456917_at   | Arfgef1            | ADP-ribosylation factor guanine nucleotide-exchange factor 1(brefeldin A-inhibite          | 1.07  | 0.446 | -1.28 | 0.317 | -1.63 | 0.006 | -1.85 | 0.081 | -0.92 |
| 1439173_at   | Hook1              | hook homolog 1 (Drosophila)                                                                | 1.02  | 0.958 | -1.19 | 0.434 | -1.65 | 0.06  | -1.97 | 0.066 | -0.95 |
| 1436347_a_at | 5530601H04Rik      | RIKEN cDNA 5530601H04 gene                                                                 | -1.06 | 0.781 | -1.48 | 0.234 | -1.19 | 0.292 | 1.03  | 0.767 | -0.67 |
| 1455627_at   | Col8a1             | procollagen, type VIII, alpha 1                                                            | -1.43 | 0.35  | -1.12 | 0.642 | -1.14 | 0.612 | 1.28  | 0.108 | -0.6  |
| 1415719_s_at | Armc1              | armadillo repeat containing 1                                                              | -1.17 | 0.306 | -1.1  | 0.117 | -1.42 | 0.103 | 1.33  | 0.226 | -0.59 |
| 1446048_at   | ---                | ---                                                                                        | 1.01  | 0.976 | -1.4  | 0.08  | -1.35 | 0.139 | -1.91 | 0.048 | -0.91 |
| 1428779_at   | Zbtb41             | zinc finger and BTB domain containing 41 homolog                                           | -1.16 | 0.311 | -1.26 | 0.007 | -1.24 | 0.085 | 1.06  | 0.792 | -0.65 |
| 1446619_at   | A130038J17Rik      | RIKEN cDNA A130038J17 gene                                                                 | -1.33 | 0.232 | -1.3  | 0.578 | -1.07 | 0.847 | 1.25  | 0.559 | -0.61 |
| 1442880_at   | ---                | ---                                                                                        | 1.47  | 0.454 | -1.76 | 0.07  | -2.31 | 0.118 | -1.41 | 0.235 | -1    |
| 1427116_at   | Setd1a             | SET domain containing 1A                                                                   | -1.54 | 0.184 | -1.2  | 0.125 | -1.02 | 0.925 | 1.13  | 0.535 | -0.66 |
| 1443042_at   | Robo1              | Roundabout homolog 1 (Drosophila)                                                          | -1.05 | 0.928 | -1.03 | 0.925 | -1.83 | 0.133 | 1.73  | 0.028 | -0.55 |
| 1454090_at   | Pdss1              | prenyl (solanesyl) diphosphate synthase, subunit 1                                         | -1.65 | 0.199 | 1.32  | 0.288 | -1.84 | 0.296 | -1.08 | 0.747 | -0.81 |
| 1458294_at   | ---                | Transcribed locus                                                                          | -1.21 | 0.632 | -1.04 | 0.93  | -1.48 | 0.221 | 1.81  | 0.168 | -0.48 |
| 1457465_at   | Shroom4            | shroom family member 4                                                                     | -1.01 | 0.942 | -1.39 | 0.381 | -1.34 | 0.277 | 1.03  | 0.844 | -0.67 |
| 1429832_at   | Ppih /// LOC433064 | peptidyl prolyl isomerase H /// similar to peptidyl prolyl isomerase H /// hypothetical    | 1.12  | 0.491 | -2.08 | 0.059 | -1.15 | 0.248 | -1.01 | 0.987 | -0.78 |
| 1449091_at   | Cldn8              | claudin 8                                                                                  | -1.23 | 0.216 | -1.35 | 0.135 | -1.1  | 0.793 | 1.88  | 0.35  | -0.45 |
| 1456059_at   | Psmc11             | proteasome (prosome, macropain) 26S subunit, non-ATPase, 11                                | -1.45 | 0.146 | -1.21 | 0.064 | -1.05 | 0.733 | 1.32  | 0.286 | -0.6  |
| 1450996_at   | Fshb               | follicle stimulating hormone beta                                                          | -1.51 | 0.338 | 1.14  | 0.131 | -1.51 | 0.633 | -1.44 | 0.484 | -0.83 |
| 1439765_x_at | Krt42              | keratin 42                                                                                 | -1.4  | 0.163 | -1.12 | 0.557 | -1.17 | 0.405 | 1.09  | 0.789 | -0.65 |
| 1443489_at   | C330002D13Rik      | RIKEN cDNA C330002D13 gene                                                                 | -1.14 | 0.536 | -1.15 | 0.338 | -1.39 | 0.156 | 1.18  | 0.015 | -0.62 |
| 1440457_at   | Cltc               | Clathrin, heavy polypeptide (Hc)                                                           | -1.22 | 0.445 | -1.19 | 0.247 | -1.24 | 0.254 | 1.4   | 0.22  | -0.56 |
| 1419553_a_at | Rabggtb            | RAB geranylgeranyl transferase, b subunit                                                  | -1.4  | 0.053 | -1.26 | 0.058 | -1.05 | 0.717 | 1.38  | 0.408 | -0.58 |
| 1435443_at   | Eya3               | eyes absent 3 homolog (Drosophila)                                                         | -1.05 | 0.724 | -1.21 | 0.27  | -1.45 | 0.144 | 1.11  | 0.552 | -0.65 |
| 1453418_at   | Col24a1            | procollagen, type XXIV, alpha 1                                                            | 1.36  | 0.251 | -1.19 | 0.54  | -3.8  | 0.002 | -2.34 | 0.304 | -1.49 |
| 1459379_at   | ---                | ---                                                                                        | 1.03  | 0.792 | -1.59 | 0.191 | -1.24 | 0.311 | -1.2  | 0.183 | -0.75 |
| 1460499_at   | 9230110I02Rik      | RIKEN cDNA 9230110I02 gene                                                                 | -1.44 | 0.076 | 1.06  | 0.835 | -1.4  | 0.005 | -1.82 | 0.213 | -0.9  |
| 1451047_at   | Itm2a              | integral membrane protein 2A                                                               | -1.41 | 0.083 | 1.2   | 0.17  | -1.81 | 0.021 | -2.61 | 0.051 | -1.16 |
| 1433849_at   | Cdc27              | cell division cycle 27 homolog (S. cerevisiae)                                             | -1    | 0.993 | -1.42 | 0.14  | -1.31 | 0.265 | 1.84  | 0.301 | -0.47 |
| 1428638_at   | Efhc2              | EF-hand domain (C-terminal) containing 2                                                   | 1.16  | 0.109 | -3.05 | 0.29  | -1.02 | 0.921 | -1.16 | 0.81  | -1.02 |
| 1453859_at   | 2410003P15Rik      | RIKEN cDNA 2410003P15 gene                                                                 | -2.14 | 0.164 | -1.53 | 0.397 | 1.35  | 0.634 | -1.06 | 0.95  | -0.85 |
| 1431238_at   | Pqlc1              | PQ loop repeat containing 1                                                                | -1.5  | 0.276 | -1.99 | 0.262 | 1.3   | 0.2   | -1.48 | 0.501 | -0.92 |
| 1460583_at   | Golt1b             | golgi transport 1 homolog B (S. cerevisiae)                                                | -1.16 | 0.364 | -1.39 | 0.53  | -1.12 | 0.497 | 1.18  | 0.588 | -0.63 |
| 1437443_at   | ---                | PREDICTED: Mus musculus hypothetical protein LOC620382 (LOC620382), mR                     | -1.17 | 0.489 | -1.24 | 0.049 | -1.24 | 0.326 | 1.03  | 0.853 | -0.66 |
| 1443485_at   | Epha7              | Eph receptor A7                                                                            | -1.04 | 0.948 | 1.03  | 0.905 | -2.11 | 0.022 | -1.55 | 0.331 | -0.92 |
| 1442033_at   | C1qtnf9            | C1q and tumor necrosis factor related protein 9                                            | -1.35 | 0.141 | -1.31 | 0.493 | -1.03 | 0.919 | 1.71  | 0.136 | -0.5  |
| 1457641_at   | Crebbp             | CREB binding protein                                                                       | -1.38 | 0.294 | 1.15  | 0.471 | -1.68 | 0.06  | -1.5  | 0.007 | -0.85 |
| 1457535_at   | 4932438A13Rik      | RIKEN cDNA 4932438A13 gene                                                                 | 1.04  | 0.589 | -1.44 | 0.134 | -1.35 | 0.097 | -1.19 | 0.261 | -0.74 |
| 1440025_at   | Kptn               | kaptin                                                                                     | -1.8  | 0.211 | -1.14 | 0.685 | 1.03  | 0.86  | -1.29 | 0.287 | -0.8  |
| 1440972_at   | Nsd1               | nuclear receptor-binding SET-domain protein 1                                              | 1.03  | 0.54  | -1.33 | 0.004 | -1.45 | 0.111 | -1.24 | 0.414 | -0.75 |

|              |                  |                                                                                   |       |       |       |       |       |       |       |       |       |
|--------------|------------------|-----------------------------------------------------------------------------------|-------|-------|-------|-------|-------|-------|-------|-------|-------|
| 1430040_at   | Hspa12a          | heat shock protein 12A                                                            | -4.17 | 0.014 | -1.22 | 0.57  | 1.41  | 0.607 | -1.02 | 0.96  | -1.25 |
| 1438824_at   | Slc20a1          | solute carrier family 20, member 1                                                | -1.17 | 0.545 | -1.01 | 0.978 | -1.6  | 0.089 | 1.81  | 0.254 | -0.49 |
| 1457462_at   | ---              | ---                                                                               | 1.11  | 0.672 | -1.44 | 0.023 | -1.51 | 0.136 | -1.05 | 0.808 | -0.72 |
| 1460116_s_at | Spred1           | sprouty protein with EVH-1 domain 1, related sequence                             | 1.09  | 0.592 | -1.22 | 0.269 | -1.79 | 0.018 | -1.08 | 0.738 | -0.75 |
| 1454930_at   | Lrrc35           | leucine rich repeat containing 35                                                 | -1.14 | 0.376 | -1.36 | 0.263 | -1.16 | 0.053 | 2.24  | 0.207 | -0.36 |
| 1419938_s_at | Arhgef17         | Rho guanine nucleotide exchange factor (GEF) 17                                   | -1.31 | 0.137 | -1.65 | 0.075 | 1.1   | 0.805 | -1.55 | 0.093 | -0.85 |
| 1440516_at   | ---              | 13 days embryo heart cDNA, RIKEN full-length enriched library, clone:D330017K     | -2.1  | 0.108 | -1.01 | 0.985 | 1.01  | 0.987 | -1.08 | 0.731 | -0.8  |
| 1418910_at   | Bmp7             | bone morphogenetic protein 7                                                      | 1.12  | 0.158 | -1.94 | 0.021 | -1.19 | 0.266 | -1.21 | 0.608 | -0.81 |
| 1424221_at   | Susd4            | sushi domain containing 4                                                         | 1.22  | 0.435 | -2.24 | 0.051 | -1.25 | 0.073 | -1.09 | 0.803 | -0.84 |
| 1450801_at   | Adam21           | a disintegrin and metallopeptidase domain 21                                      | 1.11  | 0.715 | -1.64 | 0.233 | -1.33 | 0.517 | -1.44 | 0.555 | -0.83 |
| 1425000_s_at | 5430407P10Rik    | RIKEN cDNA 5430407P10 gene                                                        | -1.8  | 0.137 | -1.03 | 0.921 | -1.06 | 0.82  | 1.02  | 0.963 | -0.72 |
| 1421361_at   | Grk1             | G protein-coupled receptor kinase 1                                               | -1.03 | 0.888 | 1.1   | 0.74  | -2.53 | 0.315 | -1.06 | 0.795 | -0.88 |
| 1425004_s_at | Mocs1            | molybdenum cofactor synthesis 1                                                   | -1.24 | 0.428 | -1.19 | 0.339 | -1.21 | 0.193 | 2.12  | 0.079 | -0.38 |
| 1426713_s_at | Eprs // LOC63367 | glutamyl-prolyl-tRNA synthetase /// similar to Bifunctional aminoacyl-tRNA synthe | -1.19 | 0.104 | -1.16 | 0.021 | -1.31 | 0.118 | 1.2   | 0.468 | -0.61 |
| 1422727_at   | Nme5             | expressed in non-metastatic cells 5                                               | -1.46 | 0.157 | -1.12 | 0.599 | -1.12 | 0.663 | 1.28  | 0.522 | -0.6  |
| 1446258_at   | Sntb1            | Syntrophin, basic 1                                                               | 1.16  | 0.127 | -1.72 | 0.107 | -1.37 | 0.125 | -1.45 | 0.279 | -0.85 |
| 1419150_at   | Myf6             | myogenic factor 6                                                                 | -1.74 | 0.028 | -1.3  | 0.735 | 1.13  | 0.654 | -1.64 | 0.02  | -0.89 |
| 1424589_s_at | Rnpc3            | RNA-binding region (RNP1, RRM) containing 3                                       | -1.22 | 0.53  | -1.1  | 0.393 | -1.35 | 0.117 | 1.26  | 0.509 | -0.6  |
| 1443380_at   | Adh5             | alcohol dehydrogenase 5 (class III), chi polypeptide                              | -1.44 | 0.758 | 1.08  | 0.848 | -1.43 | 0.523 | -1.3  | 0.618 | -0.77 |
| 1454208_at   | 4930483O08Rik    | RIKEN cDNA 4930483O08 gene                                                        | 1.03  | 0.834 | -2.05 | 0.174 | -1.05 | 0.903 | -1.1  | 0.597 | -0.79 |
| 1442920_at   | Klf3             | Kruppel-like factor 3 (basic)                                                     | -1.16 | 0.349 | -1.31 | 0.06  | -1.18 | 0.284 | 1.33  | 0.374 | -0.58 |
| 1448925_at   | Twist2           | twist homolog 2 (Drosophila)                                                      | -1.44 | 0.218 | -1.17 | 0.659 | -1.08 | 0.821 | 1.13  | 0.744 | -0.64 |
| 1435073_a_at | Armrc9           | armadillo repeat containing 9                                                     | -1.02 | 0.898 | -1.71 | 0.219 | -1.1  | 0.587 | 1.21  | 0.528 | -0.66 |
| 1451689_a_at | Sox10            | SRY-box containing gene 10                                                        | -2.14 | 0.38  | 1.06  | 0.845 | -1.06 | 0.916 | -2.34 | 0.309 | -1.12 |
| 1443180_at   | Ergic2           | ERGIC and golgi 2                                                                 | -1.33 | 0.179 | -1.18 | 0.446 | -1.15 | 0.416 | 1.19  | 0.381 | -0.62 |
| 1450837_at   | Prh1             | proline rich protein HaeIII subfamily 1                                           | -1.15 | 0.473 | -1.1  | 0.658 | -1.43 | 0.574 | 1.36  | 0.089 | -0.58 |
| 1433044_at   | Cspg2            | chondroitin sulfate proteoglycan 2                                                | 1.13  | 0.623 | -1.82 | 0.045 | -1.27 | 0.321 | -2    | 0.03  | -0.99 |
| 1418119_at   | Rbm8a            | RNA binding motif protein 8a                                                      | -1.06 | 0.653 | -1.29 | 0.064 | -1.33 | 0.023 | 1.08  | 0.589 | -0.65 |
| 1442577_at   | KIAA0415         | KIAA0415 protein                                                                  | -1.78 | 0.344 | -1.06 | 0.801 | -1.03 | 0.9   | 2.86  | 0.135 | -0.25 |
| 1458690_at   | 7-Mar            | membrane-associated ring finger (C3HC4) 7                                         | -1.07 | 0.738 | 1.01  | 0.97  | -1.9  | 0.003 | -1.78 | 0.085 | -0.94 |
| 1442973_at   | C80865           | expressed sequence C80865                                                         | 1.18  | 0.779 | -1.62 | 0.453 | -1.48 | 0.596 | -1.14 | 0.863 | -0.77 |
| 1449487_at   | Ccdc70           | coiled-coil domain containing 70                                                  | -1.08 | 0.229 | -2.51 | 0.121 | 1.15  | 0.35  | -1.28 | 0.7   | -0.93 |
| 1431156_at   | 9430040K09Rik    | RIKEN cDNA 9430040K09 gene                                                        | -1    | 0.98  | -1.1  | 0.698 | -1.79 | 0.04  | 1.12  | 0.815 | -0.69 |
| 1448694_at   | Jun              | Jun oncogene                                                                      | -1.63 | 0.117 | -1.07 | 0.753 | -1.09 | 0.415 | 1.51  | 0.076 | -0.57 |
| 1419087_s_at | Sf3a1            | splicing factor 3a, subunit 1                                                     | -1.18 | 0.382 | -1.36 | 0.349 | -1.13 | 0.287 | 1.66  | 0.237 | -0.5  |
| 1450680_at   | Rag1             | recombination activating gene 1                                                   | -1.11 | 0.262 | -1.04 | 0.937 | -1.64 | 0.593 | 1.44  | 0.346 | -0.59 |
| 1421542_at   | Dzip1            | DAZ interacting protein 1                                                         | -1.22 | 0.515 | -1.64 | 0.337 | 1.04  | 0.935 | -1.56 | 0.515 | -0.84 |
| 1441918_x_at | RP23-262J21.5    | similar to NK13                                                                   | -1.36 | 0.325 | 1.35  | 0.521 | -2.58 | 0.047 | -5.13 | 0.086 | -1.93 |
| 1443178_at   | Rnf13            | ring finger protein 13                                                            | -1.83 | 0.068 | -1.69 | 0.371 | 1.33  | 0.604 | -1.92 | 0.137 | -1.03 |
| 1421563_at   | Atp7b            | ATPase, Cu++ transporting, beta polypeptide                                       | -1.34 | 0.335 | -1.3  | 0.328 | -1.05 | 0.762 | 1.43  | 0.12  | -0.56 |
| 1444073_at   | Maf              | avian musculoaponeurotic fibrosarcoma (v-maf) AS42 oncogene homolog               | -1.28 | 0.423 | -1.08 | 0.66  | -1.3  | 0.463 | 1.21  | 0.699 | -0.62 |
| 1428639_at   | Lin9             | lin-9 homolog (C. elegans)                                                        | -1.26 | 0.424 | -1.11 | 0.642 | -1.29 | 0.38  | 1.4   | 0.54  | -0.56 |
| 1433362_at   | 4930527F18Rik    | RIKEN cDNA 4930527F18 gene                                                        | -1.26 | 0.228 | -1.2  | 0.416 | -1.18 | 0.391 | 1.33  | 0.654 | -0.58 |
| 1444687_at   | C1ql2            | complement component 1, q subcomponent-like 2                                     | -1.04 | 0.877 | -1.2  | 0.325 | -1.48 | 0.182 | 1.36  | 0.527 | -0.59 |
| 1453923_at   | Ccdc83           | coiled-coil domain containing 83                                                  | -1.38 | 0.439 | -1.12 | 0.813 | -1.18 | 0.52  | 1.31  | 0.436 | -0.59 |
| 1435398_at   | Stxbp5           | syntaxin binding protein 5 (tomosyn)                                              | -1.15 | 0.284 | -1.36 | 0.121 | -1.15 | 0.597 | 1.42  | 0.254 | -0.56 |
| 1435320_at   | Ctdspl2          | CTD (carboxy-terminal domain, RNA polymerase II, polypeptide A) small phospho     | -1.05 | 0.63  | -1.3  | 0.096 | -1.33 | 0.295 | 1.36  | 0.321 | -0.58 |
| 1442248_at   | Trio             | Triple functional domain (PTPRF interacting)                                      | -1.37 | 0.267 | 1.08  | 0.714 | -1.51 | 0.095 | -1.6  | 0.156 | -0.85 |
| 1427169_at   | Als2cr19         | amyotrophic lateral sclerosis 2 (juvenile) chromosome region, candidate 19 (hum   | -1.02 | 0.839 | -1.22 | 0.451 | -1.5  | 0.032 | 1.34  | 0.291 | -0.6  |
| 1440417_at   | D19Ert409e       | DNA segment, Chr 19, ERATO Doi 409, expressed                                     | 1.02  | 0.771 | -1.14 | 0.237 | -1.74 | 0.046 | -1.41 | 0.222 | -0.82 |
| 1433898_at   | AV025504         | Expressed sequence AV025504                                                       | -1.03 | 0.543 | -2.48 | 0.008 | 1.1   | 0.463 | -1.21 | 0.264 | -0.91 |
| 1454792_s_at | Sephs1           | selenophosphate synthetase 1                                                      | -1.04 | 0.094 | -1.27 | 0.049 | -1.38 | 0.007 | 1.32  | 0.234 | -0.59 |
| 1449640_at   | Tlr7             | toll-like receptor 7                                                              | -2.37 | 0.426 | 1.29  | 0.648 | -1.31 | 0.471 | -1.42 | 0.305 | -0.95 |

|              |                    |                                                                                    |       |       |       |       |       |       |       |       |       |
|--------------|--------------------|------------------------------------------------------------------------------------|-------|-------|-------|-------|-------|-------|-------|-------|-------|
| 1450209_at   | Hoxd4              | homeo box D4                                                                       | -2.2  | 0.498 | -1.07 | 0.9   | 1.08  | 0.8   | -1.32 | 0.497 | -0.87 |
| 1440418_at   | ---                | ---                                                                                | -1.79 | 0.445 | -1.37 | 0.711 | 1.18  | 0.754 | -1.49 | 0.63  | -0.87 |
| 1439007_at   | Alg6               | asparagine-linked glycosylation 6 homolog (yeast, alpha-1,3,-glucosyltransferase   | -1.14 | 0.17  | -1.28 | 0.099 | -1.23 | 0.196 | 1.38  | 0.142 | -0.57 |
| 1457812_at   | Trp53bp1           | transformation related protein 53 binding protein 1                                | -1.06 | 0.859 | -1.15 | 0.42  | -1.51 | 0.083 | 1.09  | 0.675 | -0.66 |
| 1420562_at   | Slurp1             | secreted Ly6/Plaur domain containing 1                                             | -1.03 | 0.961 | -1.62 | 0.454 | -1.13 | 0.816 | 1.02  | 0.968 | -0.69 |
| 1440524_at   | Utx                | ubiquitously transcribed tetratricopeptide repeat gene, X chromosome               | -1.42 | 0.654 | 1.08  | 0.768 | -1.44 | 0.089 | -1.64 | 0.428 | -0.86 |
| 1439401_x_at | Ppp2r5e            | Protein phosphatase 2, regulatory subunit B (B56), epsilon isoform                 | -1.4  | 0.345 | -1.23 | 0.385 | -1.06 | 0.713 | 1.16  | 0.014 | -0.63 |
| 1460455_at   | 1110059H15Rik      | RIKEN cDNA 1110059H15 gene                                                         | -1.23 | 0.153 | -1.11 | 0.201 | -1.32 | 0.17  | 1.27  | 0.141 | -0.6  |
| 1456912_at   | Zfp691             | zinc finger protein 691                                                            | -1.16 | 0.535 | -1.19 | 0.623 | -1.3  | 0.597 | 1.05  | 0.872 | -0.65 |
| 1419042_at   | ligp1              | interferon inducible GTPase 1                                                      | -1.05 | 0.647 | -1.18 | 0.121 | -1.5  | 0.184 | 1.11  | 0.594 | -0.65 |
| 1455621_at   | BC066107           | cDNA sequence BC066107                                                             | -1.44 | 0.372 | 1.16  | 0.554 | -1.63 | 0.036 | -1.64 | 0.269 | -0.89 |
| 1451669_at   | Ppm1b              | protein phosphatase 1B, magnesium dependent, beta isoform                          | -1.16 | 0.531 | -1.21 | 0.042 | -1.26 | 0.14  | 1.24  | 0.16  | -0.6  |
| 1431114_at   | Dock4              | dedicator of cytokinesis 4                                                         | 1.02  | 0.965 | -1.01 | 0.965 | -2.15 | 0.037 | -1.37 | 0.169 | -0.88 |
| 1442561_at   | Mamdc1             | MAM domain containing 1                                                            | -1.6  | 0.567 | 1.16  | 0.857 | -1.46 | 0.345 | -1.7  | 0.488 | -0.9  |
| 1422149_at   | Mllt7              | myeloid/lymphoid or mixed lineage-leukemia translocation to 7 homolog (Drosoph     | -2.01 | 0.573 | -1.1  | 0.545 | 1.06  | 0.67  | -1.86 | 0.444 | -0.97 |
| 1423623_at   | 2810021B07Rik      | RIKEN cDNA 2810021B07 gene                                                         | -1.31 | 0.06  | -1.5  | 0.053 | 1.05  | 0.769 | -1.12 | 0.588 | -0.72 |
| 1453857_at   | Rnf180             | ring finger protein 180                                                            | -1.3  | 0.435 | -1.18 | 0.722 | -1.16 | 0.482 | 1.13  | 0.741 | -0.63 |
| 1458961_at   | Eya3               | eyes absent 3 homolog (Drosophila)                                                 | 1.08  | 0.829 | -1.32 | 0.293 | -1.58 | 0.296 | -1.44 | 0.162 | -0.81 |
| 1423397_at   | Ugt2b38            | UDP glucuronosyltransferase 2 family, polypeptide B38                              | -2.36 | 0.003 | -5.41 | 0.031 | 1.87  | 0.106 | -1.58 | 0.459 | -1.87 |
| 1420293_at   | Aytl2              | acyltransferase like 2                                                             | -1.26 | 0.578 | -1.94 | 0.296 | 1.17  | 0.594 | -1.3  | 0.587 | -0.83 |
| 1433530_at   | 2210411K19Rik      | RIKEN cDNA 2210411K19 gene                                                         | -1.22 | 0.047 | -1.15 | 0.526 | -1.28 | 0.249 | 1.02  | 0.951 | -0.66 |
| 1444285_at   | Morf4l1            | Mortality factor 4 like 1                                                          | -1.69 | 0.016 | 1.36  | 0.526 | -1.93 | 0.008 | -1.48 | 0.04  | -0.93 |
| 1444744_at   | Dido1              | Death inducer-oblierator 1                                                         | -1.47 | 0.321 | -1.33 | 0.127 | 1.04  | 0.591 | -1.02 | 0.885 | -0.69 |
| 1423337_at   | Orc4l              | origin recognition complex, subunit 4-like (S. cerevisiae)                         | -1.03 | 0.807 | -1.32 | 0.06  | -1.34 | 0.139 | 1.02  | 0.926 | -0.67 |
| 1458169_at   | Gm700 /// LOC668-  | gene model 700, (NCBI) /// similar to Motilin receptor (G-protein coupled receptor | -1.39 | 0.318 | 1.11  | 0.715 | -1.54 | 0.179 | -1.29 | 0.459 | -0.78 |
| 1423193_at   | Pspc1              | paraspeckle protein 1                                                              | -1.42 | 0.212 | -1.31 | 0.252 | 1.01  | 0.962 | -1.08 | 0.511 | -0.7  |
| 1433375_at   | D530037P16Rik      | RIKEN cDNA D530037P16 gene                                                         | 1.02  | 0.883 | -1.03 | 0.916 | -2.08 | 0.354 | -1.08 | 0.887 | -0.79 |
| 1458829_at   | ---                | ---                                                                                | 1.03  | 0.932 | -1.15 | 0.693 | -1.73 | 0.175 | -1.51 | 0.298 | -0.84 |
| 1460144_at   | BC052040           | CDNA sequence BC052040                                                             | -1.02 | 0.977 | -1.1  | 0.762 | -1.72 | 0.26  | 1.08  | 0.796 | -0.69 |
| 1420201_at   | ---                | ---                                                                                | -1.25 | 0.811 | -2.57 | 0.16  | 1.28  | 0.19  | -1.11 | 0.811 | -0.91 |
| 1419828_at   | Usp31              | ubiquitin specific peptidase 31                                                    | -1.28 | 0.203 | -1.19 | 0.541 | -1.17 | 0.405 | 3.39  | 0.236 | -0.06 |
| 1440096_at   | Ecm2               | extracellular matrix protein 2, female organ and adipocyte specific                | -1    | 0.993 | 1.06  | 0.829 | -2.37 | 0.008 | -1.82 | 0.553 | -1.03 |
| 1449234_at   | Car15              | carbonic anhydrase 15                                                              | 1.14  | 0.414 | -2.27 | 0.104 | -1.12 | 0.631 | -1.26 | 0.234 | -0.88 |
| 1428458_at   | Pop1               | processing of precursor 1, ribonuclease P/MRP family, (S. cerevisiae)              | -1.32 | 0.264 | -1.32 | 0.409 | -1.04 | 0.893 | 1.28  | 0.438 | -0.6  |
| 1447186_at   | Slc6a16 /// LOC672 | solute carrier family 6, member 16 /// similar to Orphan sodium- and chloride-dep  | -1.33 | 0.313 | -1.32 | 0.566 | -1.04 | 0.922 | 1.25  | 0.557 | -0.61 |
| 1444574_at   | Elf2               | E74-like factor 2                                                                  | 1.09  | 0.863 | -1.35 | 0.095 | -1.56 | 0.011 | -1.07 | 0.83  | -0.72 |
| 1459850_x_at | Glr1b              | glycine receptor, beta subunit                                                     | -2.05 | 0.514 | 1.22  | 0.31  | -1.3  | 0.24  | -1.38 | 0.064 | -0.88 |
| 1458554_at   | 9330169B04Rik      | RIKEN cDNA 9330169B04 gene                                                         | -1.86 | 0.2   | 1.23  | 0.598 | -1.41 | 0.366 | -1.48 | 0.345 | -0.88 |
| 1432317_at   | 9430078K24Rik      | RIKEN cDNA 9430078K24 gene                                                         | 1.07  | 0.741 | -2.28 | 0.018 | -1.03 | 0.896 | -2.36 | 0.273 | -1.15 |
| 1455216_at   | Paqr6              | progesterin and adipoQ receptor family member VI                                   | -2.23 | 0.057 | 1.21  | 0.767 | -1.22 | 0.401 | -1.25 | 0.512 | -0.87 |
| 1439371_x_at | Timm44             | translocase of inner mitochondrial membrane 44                                     | -1.21 | 0.196 | -1.48 | 0.102 | -1.02 | 0.943 | 1.13  | 0.372 | -0.65 |
| 1423936_at   | Kctd5              | potassium channel tetramerisation domain containing 5                              | -1.12 | 0.389 | -1.56 | 0.049 | -1.06 | 0.643 | 1.09  | 0.175 | -0.66 |
| 1425424_at   | MGC7817            | hypothetical protein LOC620031                                                     | -1.36 | 0.058 | 1.13  | 0.556 | -1.65 | 0.093 | -1.46 | 0.171 | -0.83 |
| 1416272_at   | Map2k1ip1          | mitogen-activated protein kinase kinase 1 interacting protein 1                    | -1.24 | 0.182 | -1.08 | 0.391 | -1.34 | 0.175 | 1.05  | 0.561 | -0.65 |
| 1459268_at   | 5330439C02Rik      | RIKEN cDNA 5330439C02 gene                                                         | -1.16 | 0.707 | -1.21 | 0.374 | -1.27 | 0.629 | 1.85  | 0.322 | -0.45 |
| 1430138_at   | Cd3eap             | CD3E antigen, epsilon polypeptide associated protein                               | -1.54 | 0.31  | 1.17  | 0.64  | -1.52 | 0.134 | -1.32 | 0.126 | -0.8  |
| 1437175_at   | Pdik1l             | PDLIM1 interacting kinase 1 like                                                   | -1.02 | 0.784 | -1.26 | 0.118 | -1.42 | 0.005 | 1.28  | 0.37  | -0.61 |
| 1457189_at   | Itpr1              | Inositol 1,4,5-triphosphate receptor 1                                             | -1.11 | 0.716 | 1.05  | 0.887 | -1.89 | 0.025 | -1.66 | 0.18  | -0.9  |
| 1442103_at   | Nipbl              | Nipped-B homolog (Drosophila)                                                      | -1.13 | 0.473 | 1.03  | 0.93  | -1.78 | 0.021 | -1.13 | 0.421 | -0.75 |
| 1425254_at   | Foxn4              | forkhead box N4                                                                    | -2.23 | 0.103 | 1.25  | 0.708 | -1.28 | 0.675 | -1.14 | 0.835 | -0.85 |
| 1458342_at   | Tmem90a            | transmembrane protein 90a                                                          | -1.22 | 0.621 | 1.21  | 0.622 | -2.21 | 0.012 | -1.49 | 0.401 | -0.93 |
| 1458799_at   | A330033J07Rik      | RIKEN cDNA A330033J07 gene                                                         | -1.53 | 0.111 | 1.19  | 0.691 | -1.58 | 0.432 | -1.69 | 0.371 | -0.9  |
| 1447795_at   | Bspry              | B-box and SPRY domain containing                                                   | 1.04  | 0.731 | -2.02 | 0.491 | -1.07 | 0.427 | -2.11 | 0.106 | -1.04 |

|              |               |                                                                                       |       |       |       |       |       |       |       |       |       |
|--------------|---------------|---------------------------------------------------------------------------------------|-------|-------|-------|-------|-------|-------|-------|-------|-------|
| 1451202_at   | C330007P06Rik | RIKEN cDNA C330007P06 gene                                                            | -1.13 | 0.208 | -1.19 | 0.056 | -1.33 | 0.002 | 1.2   | 0.06  | -0.61 |
| 1433521_at   | Ankrd13c      | ankyrin repeat domain 13c                                                             | -1.2  | 0.038 | -1.24 | 0.003 | -1.2  | 0.141 | 1.05  | 0.47  | -0.65 |
| 1456396_at   | ---           | ---                                                                                   | -1.62 | 0.251 | -1.3  | 0.095 | 1.09  | 0.661 | -1.15 | 0.653 | -0.74 |
| 1450222_x_at | Klk1b4        | kallikrein 1-related peptidase b4                                                     | -1.3  | 0.365 | -1.07 | 0.85  | -1.29 | 0.544 | 1.41  | 0.552 | -0.56 |
| 1458111_at   | C530043G21Rik | RIKEN cDNA C530043G21 gene                                                            | 1.14  | 0.711 | -1.31 | 0.572 | -1.73 | 0.032 | -1.43 | 0.149 | -0.83 |
| 1419785_at   | AA516738      | expressed sequence AA516738                                                           | -1.29 | 0.398 | -1.7  | 0.427 | 1.12  | 0.848 | -1.31 | 0.667 | -0.8  |
| 1457491_at   | ---           | ---                                                                                   | 1.09  | 0.456 | -1.22 | 0.427 | -1.75 | 0.004 | -1.54 | 0.05  | -0.86 |
| 1437720_at   | Lgtn          | Ligatin                                                                               | -1.29 | 0.403 | -1.32 | 0.359 | -1.06 | 0.771 | 1.22  | 0.576 | -0.61 |
| 1457470_at   | D3Ert452e     | DNA segment, Chr 3, ERATO Doi 452, expressed                                          | -1.82 | 0.007 | 1.27  | 0.597 | -1.52 | 0.195 | -1.21 | 0.638 | -0.82 |
| 1430061_at   | 1700105P06Rik | RIKEN cDNA 1700105P06 gene                                                            | -1.01 | 0.958 | 1.01  | 0.959 | -2.09 | 0.354 | -1.35 | 0.375 | -0.86 |
| 1450875_at   | Gpr37         | G protein-coupled receptor 37                                                         | 1.13  | 0.862 | -1.39 | 0.554 | -1.6  | 0.138 | -1.5  | 0.385 | -0.84 |
| 1460443_at   | Brms1l        | breast cancer metastasis-suppressor 1-like                                            | -1.32 | 0.203 | -1.16 | 0.287 | -1.17 | 0.199 | 1.21  | 0.342 | -0.61 |
| 1445078_at   | D7Ert526e     | DNA segment, Chr 7, ERATO Doi 526, expressed                                          | -2.29 | 0.053 | -1.49 | 0.472 | 1.37  | 0.576 | -1.66 | 0.394 | -1.02 |
| 1447240_at   | ---           | ---                                                                                   | 1.1   | 0.695 | -1.09 | 0.596 | -2.16 | 0.017 | -1.36 | 0.345 | -0.88 |
| 1439488_at   | ---           | 7 days embryo whole body cDNA, RIKEN full-length enriched library, clone:C430l        | -1.28 | 0.066 | -1.17 | 0.498 | -1.19 | 0.339 | 1.53  | 0.03  | -0.53 |
| 1434977_at   | 4933403F05Rik | RIKEN cDNA 4933403F05 gene                                                            | -1.17 | 0.441 | -1.12 | 0.38  | -1.37 | 0.086 | 1.21  | 0.494 | -0.61 |
| 1435399_at   | 2310068J10Rik | RIKEN cDNA 2310068J10 gene                                                            | 1.02  | 0.94  | -1.25 | 0.617 | -1.52 | 0.076 | -1.93 | 0.066 | -0.92 |
| 1419844_a_at | LOC545086     | hypothetical protein LOC545086                                                        | 1.05  | 0.912 | -1.1  | 0.887 | -1.94 | 0.056 | -1.57 | 0.282 | -0.89 |
| 1458321_at   | Pik3cd        | phosphatidylinositol 3-kinase catalytic delta polypeptide                             | -1.03 | 0.781 | -1.51 | 0.394 | -1.18 | 0.48  | 1.74  | 0.304 | -0.5  |
| 1430662_at   | 9430091E24Rik | RIKEN cDNA 9430091E24 gene                                                            | -1.5  | 0.19  | -1.24 | 0.639 | 1.01  | 0.979 | -1.41 | 0.006 | -0.79 |
| 1460016_at   | Tmem164       | transmembrane protein 164                                                             | -1.24 | 0.05  | 1.11  | 0.776 | -1.78 | 0.067 | -1.19 | 0.211 | -0.77 |
| 1441013_at   | C81521        | expressed sequence C81521                                                             | -1.12 | 0.606 | 1.22  | 0.457 | -2.76 | 0.008 | -1.29 | 0.462 | -0.99 |
| 1457851_at   | D10Ert276e    | DNA segment, Chr 10, ERATO Doi 276, expressed                                         | -1.06 | 0.893 | -1.28 | 0.132 | -1.33 | 0.02  | 5.57  | 0.14  | 0.48  |
| 1428756_at   | Aasdhpt       | aminoadipate-semialdehyde dehydrogenase-phosphopantetheinyl transferase               | -1.18 | 0.02  | -1.2  | 0.096 | -1.26 | 0.036 | 1.12  | 0.587 | -0.63 |
| 1430989_a_at | 1700020I14Rik | RIKEN cDNA 1700020I14 gene                                                            | -1.09 | 0.665 | -1.04 | 0.631 | -1.67 | 0.018 | 1.24  | 0.35  | -0.64 |
| 1447106_at   | Lrrk2         | Leucine-rich repeat kinase 2                                                          | -1.9  | 0.468 | -1.08 | 0.614 | 1.03  | 0.956 | -1.5  | 0.699 | -0.86 |
| 1445464_at   | ---           | ---                                                                                   | -1.84 | 0.562 | 1.41  | 0.547 | -1.89 | 0.207 | -1.49 | 0.319 | -0.95 |
| 1434233_at   | 2610030H06Rik | RIKEN cDNA 2610030H06 gene                                                            | -1.46 | 0.155 | -1.4  | 0.026 | 1.08  | 0.719 | -1.13 | 0.584 | -0.73 |
| 1440373_at   | Elavl1        | ELAV (embryonic lethal, abnormal vision, Drosophila)-like 1 (Hu antigen R)            | 1.01  | 0.966 | -1.09 | 0.636 | -1.83 | 0.014 | -1.05 | 0.744 | -0.74 |
| 1440691_at   | Cyp2j6        | cytochrome P450, family 2, subfamily j, polypeptide 6                                 | -1.33 | 0.17  | -1.08 | 0.64  | -1.24 | 0.329 | 1.08  | 0.616 | -0.64 |
| 1438569_at   | Ccdc38        | coiled-coil domain containing 38                                                      | -1.21 | 0.788 | -1.14 | 0.708 | -1.29 | 0.62  | 1.71  | 0.373 | -0.48 |
| 1432402_at   | 4930402F11Rik | RIKEN cDNA 4930402F11 gene                                                            | -1.78 | 0.188 | 1.32  | 0.533 | -1.67 | 0.176 | -1.03 | 0.931 | -0.79 |
| 1440929_at   | ---           | ---                                                                                   | -1.44 | 0.396 | -1.15 | 0.697 | -1.09 | 0.637 | 1.24  | 0.174 | -0.61 |
| 1457180_at   | Dip2c         | DIP2 disco-interacting protein 2 homolog C (Drosophila)                               | -1.01 | 0.969 | -1.11 | 0.702 | -1.7  | 0.119 | 1.73  | 0.312 | -0.52 |
| 1451319_at   | Senp1         | SUMO1/sentrin specific peptidase 1                                                    | -1.23 | 0.532 | -1.36 | 0.522 | -1.08 | 0.735 | 1.23  | 0.282 | -0.61 |
| 1443184_at   | Cdc14a        | CDC14 cell division cycle 14 homolog A (S. cerevisiae)                                | 1.09  | 0.746 | -1.7  | 0.188 | -1.24 | 0.321 | -1.27 | 0.178 | -0.78 |
| 1444207_at   | Cml3          | Camello-like 3                                                                        | -1.07 | 0.78  | -1.61 | 0.038 | -1.08 | 0.753 | 1.61  | 0.203 | -0.54 |
| 1427147_at   | F730047E07Rik | RIKEN cDNA F730047E07 gene                                                            | -1.23 | 0.529 | -1.37 | 0.195 | -1.07 | 0.688 | 2.21  | 0.186 | -0.37 |
| 1453415_at   | Zc3h6         | zinc finger CCCH type containing 6                                                    | -1.08 | 0.84  | -1.3  | 0.328 | -1.27 | 0.547 | 1.02  | 0.98  | -0.66 |
| 1452879_at   | Synpo2        | synaptopodin 2                                                                        | 1.29  | 0.109 | -3.74 | 0.003 | -1.09 | 0.751 | -1.14 | 0.585 | -1.17 |
| 1435562_at   | Pdzd8         | PDZ domain containing 8                                                               | -1.09 | 0.405 | -1.48 | 0.115 | -1.13 | 0.415 | 1.23  | 0.475 | -0.62 |
| 1444356_at   | Rab6ip2       | Rab6 interacting protein 2                                                            | 1.03  | 0.913 | -1.48 | 0.39  | -1.29 | 0.654 | -1.38 | 0.614 | -0.78 |
| 1423979_a_at | Slc25a29      | solute carrier family 25 (mitochondrial carrier, palmitoylcarnitine transporter), men | -1.25 | 0.352 | -1.75 | 0.127 | 1.11  | 0.586 | -1.16 | 0.627 | -0.76 |
| 1432115_a_at | Pign          | phosphatidylinositol glycan anchor biosynthesis, class N                              | -2.74 | 0.342 | 1.23  | 0.671 | -1.13 | 0.858 | -1.34 | 0.609 | -0.99 |
| 1443628_at   | ---           | ---                                                                                   | -1.12 | 0.693 | -1.07 | 0.763 | -1.53 | 0.21  | 1.16  | 0.469 | -0.64 |
| 1420298_at   | ---           | ---                                                                                   | -2.54 | 0.373 | -2.46 | 0.432 | 1.68  | 0.245 | -1.08 | 0.901 | -1.1  |
| 1425475_at   | Col4a5        | procollagen, type IV, alpha 5                                                         | -1.53 | 0.005 | -1.47 | 0.041 | 1.15  | 0.608 | -1.21 | 0.41  | -0.77 |
| 1424199_at   | Seh1l         | SEH1-like (S. cerevisiae)                                                             | -1.26 | 0.025 | -1.25 | 0.03  | -1.13 | 0.321 | 1.45  | 0.196 | -0.55 |
| 1429106_at   | 4921509J17Rik | RIKEN cDNA 4921509J17 gene                                                            | -1.37 | 0.053 | -1.17 | 0.492 | -1.12 | 0.518 | 2.01  | 0.255 | -0.41 |
| 1442417_at   | Med8          | mediator of RNA polymerase II transcription, subunit 8 homolog (yeast)                | -1.22 | 0.185 | -1.18 | 0.144 | -1.23 | 0.249 | 1.12  | 0.249 | -0.63 |
| 1420174_s_at | ---           | ---                                                                                   | -1.28 | 0.49  | -1.13 | 0.449 | -1.22 | 0.178 | 1.02  | 0.898 | -0.65 |
| 1443838_x_at | Fads2         | fatty acid desaturase 2                                                               | -1.21 | 0.214 | -1.36 | 0.451 | -1.09 | 0.841 | 1.12  | 0.847 | -0.63 |
| 1435167_at   | Ranbp6        | RAN binding protein 6                                                                 | -1.15 | 0.549 | -1.17 | 0.291 | -1.32 | 0.051 | 1.17  | 0.448 | -0.62 |

|              |                   |                                                                                 |       |       |       |       |       |       |       |       |       |
|--------------|-------------------|---------------------------------------------------------------------------------|-------|-------|-------|-------|-------|-------|-------|-------|-------|
| 1435162_at   | Prkg2             | protein kinase, cGMP-dependent, type II                                         | -1.05 | 0.828 | -1.41 | 0.12  | -1.22 | 0.066 | 1.14  | 0.831 | -0.64 |
| 1440221_at   | AA408650          | expressed sequence AA408650                                                     | -1.2  | 0.497 | -1.31 | 0.144 | -1.12 | 0.181 | 1.18  | 0.591 | -0.61 |
| 1447048_at   | 6720458F09Rik     | RIKEN cDNA 6720458F09 gene                                                      | -1.85 | 0.417 | -1.52 | 0.228 | 1.28  | 0.621 | -1.11 | 0.328 | -0.8  |
| 1432391_at   | Ccdc21            | coiled-coil domain containing 21                                                | -1.01 | 0.949 | -1.09 | 0.673 | -1.73 | 0.207 | 1.06  | 0.504 | -0.69 |
| 1430500_s_at | Mtx2              | metaxin 2                                                                       | -1.3  | 0.005 | -1.31 | 0.008 | -1.06 | 0.327 | 1.04  | 0.825 | -0.66 |
| 1442844_at   | A830052D11Rik     | RIKEN cDNA A830052D11 gene                                                      | 1.1   | 0.801 | -1.38 | 0.405 | -1.53 | 0.461 | -1.12 | 0.616 | -0.73 |
| 1445428_at   | ---               | ---                                                                             | 1.1   | 0.703 | -1.31 | 0.443 | -1.62 | 0.068 | -1.4  | 0.256 | -0.81 |
| 1444775_at   | 9930033D15Rik     | RIKEN cDNA 9930033D15 gene                                                      | 1.41  | 0.172 | -2.73 | 0.199 | -1.41 | 0.185 | -1.12 | 0.735 | -0.96 |
| 1451856_at   | Tnrc15            | trinucleotide repeat containing 15                                              | -1.58 | 0.231 | -1.17 | 0.787 | -1.01 | 0.981 | 1.1   | 0.641 | -0.66 |
| 1450600_at   | Olf1508           | olfactory receptor 1508                                                         | -1.09 | 0.608 | -1.3  | 0.391 | -1.26 | 0.172 | 1.4   | 0.013 | -0.56 |
| 1440567_at   | D030051N19Rik     | RIKEN cDNA D030051N19 gene                                                      | 1.12  | 0.428 | -1.37 | 0.299 | -1.56 | 0.192 | -1.24 | 0.267 | -0.77 |
| 1443008_at   | Msi2              | Musashi homolog 2 (Drosophila)                                                  | -1.43 | 0.254 | -1.04 | 0.86  | -1.21 | 0.678 | 1.17  | 0.582 | -0.63 |
| 1457975_at   | Gtpbp3            | GTP binding protein 3                                                           | -1.87 | 0.213 | -1.07 | 0.828 | 1.01  | 0.983 | -1.2  | 0.477 | -0.78 |
| 1458007_at   | Myo1b             | myosin IB                                                                       | -1    | 0.997 | -1.02 | 0.931 | -1.97 | 0.002 | 1.32  | 0.512 | -0.67 |
| 1446580_at   | 9430083G14Rik     | RIKEN cDNA 9430083G14 gene                                                      | 1.07  | 0.766 | -1.21 | 0.767 | -1.69 | 0.128 | -1.72 | 0.282 | -0.89 |
| 1418938_at   | Dio2              | deiodinase, iodothyronine, type II                                              | -1.18 | 0.36  | -1.56 | 0.355 | -1    | 0.998 | 1.14  | 0.758 | -0.65 |
| 1427848_at   | Tcrb-V13          | T-cell receptor beta, variable 13                                               | -4.95 | 0.08  | -1.97 | 0     | 1.77  | 0.13  | -1.65 | 0.423 | -1.7  |
| 1439487_at   | Lig4              | ligase IV, DNA, ATP-dependent                                                   | 1.19  | 0.48  | -1.68 | 0.051 | -1.44 | 0.008 | -1.29 | 0.301 | -0.8  |
| 1441466_at   | Sfrs10            | splicing factor, arginine/serine-rich 10 (transformer 2 homolog, Drosophila)    | -1.27 | 0.141 | -1.17 | 0.58  | -1.19 | 0.615 | 1.39  | 0.236 | -0.56 |
| 1444145_at   | Mettl6            | Methyltransferase like 6                                                        | -1.31 | 0.432 | -1.02 | 0.946 | -1.35 | 0.1   | 1.04  | 0.903 | -0.66 |
| 1449140_at   | Nudcd2            | NudC domain containing 2                                                        | -1.45 | 0.17  | -1.03 | 0.811 | -1.22 | 0.403 | 1.69  | 0.234 | -0.5  |
| 1421055_at   | Lats2 /// Xpo4    | large tumor suppressor 2 /// exportin 4                                         | -1.15 | 0.457 | -1.12 | 0.547 | -1.37 | 0.029 | 1.33  | 0.273 | -0.58 |
| 1430183_at   | Pbx1              | Pre B-cell leukemia transcription factor 1                                      | -1.01 | 0.982 | 1.08  | 0.798 | -2.41 | 0.018 | -1.39 | 0.124 | -0.93 |
| 1447874_x_at | Smpd1             | sphingomyelin phosphodiesterase 1, acid lysosomal                               | -1.41 | 0.339 | -1.01 | 0.942 | -1.28 | 0.248 | 1.29  | 0.088 | -0.6  |
| 1458925_at   | Zfp82             | zinc finger protein 82                                                          | -1.41 | 0.659 | -1.05 | 0.888 | -1.22 | 0.512 | 1.08  | 0.87  | -0.65 |
| 1454354_at   | 8030476L19Rik     | RIKEN cDNA 8030476L19 gene                                                      | -1.02 | 0.813 | -1.4  | 0.073 | -1.26 | 0.298 | 1.37  | 0.073 | -0.58 |
| 1457802_at   | B930012P20Rik     | RIKEN cDNA B930012P20 gene                                                      | -1.19 | 0.307 | 1.16  | 0.459 | -2.06 | 0.032 | -1.26 | 0.588 | -0.84 |
| 1444438_at   | Cib3              | calcium and integrin binding family member 3                                    | 1.55  | 0.425 | -2.39 | 0.051 | -1.96 | 0.15  | -1.56 | 0.395 | -1.09 |
| 1458280_at   | Ascc2             | Activating signal cointegrator 1 complex subunit 2                              | -1.34 | 0.626 | -1.4  | 0.472 | 1.02  | 0.891 | -1.44 | 0.099 | -0.79 |
| 1460614_at   | Mier3             | mesoderm induction early response 1, family member 3                            | -1.19 | 0.053 | -1.05 | 0.367 | -1.46 | 0.005 | 2.05  | 0.243 | -0.41 |
| 1444746_at   | Ptbp2             | Polypyrimidine tract binding protein 2                                          | 1.07  | 0.602 | -1.17 | 0.167 | -1.79 | 0.002 | -1.3  | 0.142 | -0.8  |
| 1433750_at   | Slc31a1           | solute carrier family 31, member 1                                              | -1.14 | 0.161 | -1.03 | 0.612 | -1.57 | 0.045 | 1.33  | 0.444 | -0.6  |
| 1443505_at   | Prok1             | Prokineticin 1                                                                  | 1.33  | 0.16  | -3.26 | 0.013 | -1.19 | 0.657 | -1.11 | 0.372 | -1.06 |
| 1449090_a_at | Yes1              | Yamaguchi sarcoma viral (v-yes) oncogene homolog 1                              | -1.27 | 0.398 | -1.04 | 0.795 | -1.35 | 0.042 | 1.02  | 0.804 | -0.66 |
| 1430738_at   | 4833419K08Rik     | RIKEN cDNA 4833419K08 gene                                                      | -2.27 | 0.44  | -1.23 | 0.522 | 1.23  | 0.534 | -3.01 | 0.179 | -1.32 |
| 1438313_at   | ---               | Transcribed locus                                                               | 1.02  | 0.9   | -1.94 | 0.183 | -1.06 | 0.884 | -1.8  | 0.072 | -0.94 |
| 1441531_at   | Plcb4             | phospholipase C, beta 4                                                         | -1.05 | 0.712 | 1.11  | 0.682 | -2.36 | 0.001 | -1.58 | 0.049 | -0.97 |
| 1436728_s_at | Rtel1             | regulator of telomere elongation helicase 1                                     | -1.47 | 0.017 | -1.18 | 0.199 | -1.05 | 0.892 | 1.21  | 0.492 | -0.62 |
| 1435950_at   | Hr                | hairless                                                                        | -1.68 | 0.05  | 1.11  | 0.757 | -1.29 | 0.353 | -1.75 | 0.08  | -0.9  |
| 1453377_at   | Sh2d4a            | SH2 domain containing 4A                                                        | -1.23 | 0.036 | -1.07 | 0.599 | -1.36 | 0.102 | 1.51  | 0.298 | -0.54 |
| 1424029_at   | Tspyl4            | TSPY-like 4                                                                     | -1.11 | 0.423 | -1.95 | 0.107 | 1.07  | 0.386 | -1.69 | 0.089 | -0.92 |
| 1420208_at   | ---               | ---                                                                             | -1.27 | 0.723 | -1.48 | 0.639 | 1.02  | 0.923 | -1.66 | 0.531 | -0.85 |
| 1443741_x_at | Whsc1 /// LOC6223 | Wolf-Hirschhorn syndrome candidate 1 (human) /// similar to Wolf-Hirschhorn syn | -1.13 | 0.686 | -1.16 | 0.484 | -1.35 | 0.299 | 1.06  | 0.796 | -0.65 |
| 1434733_at   | Stk36             | serine/threonine kinase 36 (fused homolog, Drosophila)                          | -1.89 | 0.025 | -1.19 | 0.557 | 1.12  | 0.528 | -1.14 | 0.753 | -0.78 |
| 1429305_at   | Ankrd10           | ankyrin repeat domain 10                                                        | -1.12 | 0.222 | -1.43 | 0.096 | -1.13 | 0.27  | 1.87  | 0.345 | -0.45 |
| 1433088_at   | 5330430C04Rik     | RIKEN cDNA 5330430C04 gene                                                      | -1.79 | 0.077 | -1.11 | 0.564 | 1.02  | 0.938 | -1.23 | 0.418 | -0.78 |
| 1417957_a_at | Tspan1            | tetraspanin 1                                                                   | -1.04 | 0.708 | -1.64 | 0.121 | -1.1  | 0.705 | 1.34  | 0.162 | -0.61 |
| 1457385_at   | ---               | ---                                                                             | -1.35 | 0.257 | -1.02 | 0.956 | -1.3  | 0.284 | 1.19  | 0.484 | -0.62 |
| 1449733_s_at | Siah1a            | seven in absentia 1A                                                            | -1.18 | 0.334 | -1.1  | 0.101 | -1.38 | 0.042 | 1.1   | 0.611 | -0.64 |
| 1436744_x_at | Fbxw14 /// LOC668 | F-box and WD-40 domain protein 14 /// similar to F-box and WD-40 domain prote   | -1.68 | 0.213 | -1.62 | 0.427 | 1.27  | 0.448 | -1.02 | 0.969 | -0.76 |
| 1436700_a_at | Ddx48             | DEAD (Asp-Glu-Ala-Asp) box polypeptide 48                                       | 1.29  | 0.644 | -1.98 | 0.056 | -1.45 | 0.303 | -1.39 | 0.665 | -0.88 |
| 1458361_at   | Dclre1c           | DNA cross-link repair 1C, PSO2 homolog (S. cerevisiae)                          | -1.49 | 0.281 | -1.23 | 0.629 | 1     | 0.992 | -1.21 | 0.431 | -0.73 |
| 1425286_at   | Crygn             | crystallin, gamma N                                                             | -1.38 | 0.077 | -1.24 | 0.705 | -1.05 | 0.928 | 1.42  | 0.585 | -0.56 |

|              |                    |                                                                                |       |       |       |       |       |       |       |       |       |
|--------------|--------------------|--------------------------------------------------------------------------------|-------|-------|-------|-------|-------|-------|-------|-------|-------|
| 1441211_at   | Kcns2              | K+ voltage-gated channel, subfamily S, 2                                       | -1.41 | 0.496 | -1.3  | 0.664 | 1     | 0.989 | -1.54 | 0.363 | -0.81 |
| 1455100_at   | Akr1d1             | aldo-keto reductase family 1, member D1                                        | -1.7  | 0.256 | -1.07 | 0.362 | -1.04 | 0.916 | 1.72  | 0.366 | -0.52 |
| 1442876_at   | Mapk1              | Mitogen activated protein kinase 1                                             | -1.99 | 0.419 | 1.61  | 0.191 | -2.66 | 0.035 | -1.21 | 0.682 | -1.06 |
| 1417645_at   | Sspn               | sarcospan                                                                      | -1.07 | 0.925 | -2.8  | 0.01  | 1.19  | 0.245 | -1.25 | 0.582 | -0.98 |
| 1429545_at   | Ube2i /// F830028C | ubiquitin-conjugating enzyme E2I /// RIKEN cDNA F830028O17 gene /// similar to | -1.33 | 0.028 | -1.15 | 0.729 | -1.15 | 0.094 | 1.02  | 0.898 | -0.65 |
| 1431570_at   | 4930588G17Rik      | RIKEN cDNA 4930588G17 gene                                                     | -1.57 | 0.435 | 1.1   | 0.834 | -1.33 | 0.538 | -1.01 | 0.977 | -0.7  |
| 1428221_at   | Klhdc8b            | kelch domain containing 8B                                                     | 1.08  | 0.852 | -1.37 | 0.437 | -1.49 | 0.033 | -1.2  | 0.76  | -0.74 |
| 1439882_at   | Sec23ip            | Sec23 interacting protein                                                      | -1.01 | 0.974 | -1.28 | 0.506 | -1.4  | 0.218 | 1.24  | 0.145 | -0.61 |
| 1424037_at   | Itpka              | inositol 1,4,5-trisphosphate 3-kinase A                                        | -2.31 | 0.068 | -1.42 | 0.556 | 1.35  | 0.202 | -1.69 | 0.199 | -1.02 |
| 1421242_at   | Rnf144             | ring finger protein 144                                                        | -3.37 | 0.041 | -1.34 | 0.218 | 1.45  | 0.473 | -1.14 | 0.789 | -1.1  |
| 1422589_at   | Rab3a              | RAB3A, member RAS oncogene family                                              | -1.12 | 0.7   | -2.38 | 0.361 | 1.18  | 0.372 | -1.12 | 0.787 | -0.86 |
| 1427754_a_at | Dnm1               | dynamin 1                                                                      | 1.1   | 0.654 | -1.69 | 0.341 | -1.26 | 0.231 | -1.23 | 0.352 | -0.77 |
| 1458908_at   | Dtna               | Dystrobrevin alpha                                                             | -1.03 | 0.954 | 1.08  | 0.811 | -2.31 | 0.118 | -2.27 | 0.165 | -1.13 |
| 1460006_at   | Atbf1              | AT motif binding factor 1                                                      | -1.01 | 0.959 | -1.08 | 0.684 | -1.74 | 0.035 | 1.12  | 0.666 | -0.68 |
| 1443952_at   | Thra               | thyroid hormone receptor alpha                                                 | -1.13 | 0.575 | -1.01 | 0.917 | -1.62 | 0.086 | 1.37  | 0.111 | -0.6  |
| 1436730_at   | Clcc1              | chloride channel CLIC-like 1                                                   | -1.23 | 0.04  | 1.09  | 0.789 | -1.71 | 0.093 | -1.08 | 0.706 | -0.73 |
| 1423220_at   | Elf4e /// LOC63052 | eukaryotic translation initiation factor 4E /// hypothetical LOC630527         | -1.12 | 0.343 | -1.08 | 0.633 | -1.51 | 0.001 | 1.62  | 0.31  | -0.52 |
| 1429161_at   | Arv1               | ARV1 homolog (yeast)                                                           | -1.36 | 0.138 | -1.4  | 0.16  | 1.04  | 0.851 | -1.45 | 0.086 | -0.79 |
| 1455675_a_at | Tial1              | Tial1 cytotoxic granule-associated RNA binding protein-like 1                  | -1.24 | 0.247 | -1.16 | 0.288 | -1.22 | 0.202 | 1.26  | 0.256 | -0.59 |
| 1460533_at   | 4933440K10Rik      | RIKEN cDNA 4933440K10 gene                                                     | -1.77 | 0.532 | -1.77 | 0.419 | 1.36  | 0.486 | -2.33 | 0.303 | -1.13 |
| 1427320_at   | Copg2as2           | coatomer protein complex, subunit gamma 2, antisense 2                         | -1.16 | 0.63  | 1.15  | 0.315 | -2.1  | 0.001 | -1.37 | 0.341 | -0.87 |
| 1440847_at   | Mtss1              | metastasis suppressor 1                                                        | -1.8  | 0.005 | -1.18 | 0.043 | 1.09  | 0.818 | -1.9  | 0.124 | -0.95 |
| 1431387_at   | Anxa11             | Annexin A11                                                                    | -2.7  | 0.464 | -1.65 | 0.431 | 1.51  | 0.357 | -1.25 | 0.412 | -1.02 |
| 1439597_at   | 4932417H02Rik      | RIKEN cDNA 4932417H02 gene                                                     | -1.41 | 0.149 | -1.06 | 0.838 | -1.2  | 0.436 | 1     | 0.984 | -0.67 |
| 1453845_at   | 4733401D01Rik      | RIKEN cDNA 4733401D01 gene                                                     | -1.8  | 0.37  | 1.1   | 0.874 | -1.2  | 0.716 | -1.39 | 0.629 | -0.82 |
| 1448426_at   | Sardh              | sarcosine dehydrogenase                                                        | -1.22 | 0.228 | -1.24 | 0.285 | -1.16 | 0.709 | 1.59  | 0.445 | -0.51 |
| 1455475_at   | 3110057O12Rik      | RIKEN cDNA 3110057O12 gene                                                     | -1.09 | 0.563 | -1.27 | 0.294 | -1.28 | 0.31  | 1.03  | 0.884 | -0.65 |
| 1446475_at   | Mbnl2              | Muscleblind-like 2                                                             | -1.34 | 0.382 | 1.25  | 0.34  | -2.03 | 0.033 | -1.54 | 0.146 | -0.91 |
| 1422241_a_at | Ndufa1             | NADH dehydrogenase (ubiquinone) 1 alpha subcomplex, 1                          | -1.24 | 0.009 | -1.17 | 0.081 | -1.21 | 0.003 | 1.07  | 0.531 | -0.64 |
| 1437321_at   | ---                | ---                                                                            | -2.77 | 0.108 | -1.26 | 0.446 | 1.34  | 0.579 | -1.2  | 0.845 | -0.97 |
| 1449771_at   | ---                | ---                                                                            | -1.51 | 0.494 | 1.11  | 0.794 | -1.4  | 0.415 | -1.09 | 0.842 | -0.72 |
| 1444974_at   | AU023617           | expressed sequence AU023617                                                    | -1.34 | 0.691 | 1.06  | 0.715 | -1.46 | 0.103 | -1.34 | 0.581 | -0.77 |
| 1443777_at   | ---                | ---                                                                            | -1.64 | 0.472 | -1.24 | 0.526 | 1.07  | 0.808 | -1.72 | 0.349 | -0.88 |
| 1460005_at   | AF013969 /// LOC6  | expressed sequence AF013969 /// similar to CG5514-PB, isoform B /// region cor | -1.1  | 0.726 | -1.53 | 0.134 | -1.08 | 0.693 | 1.18  | 0.473 | -0.63 |
| 1446126_at   | ---                | Transcribed locus                                                              | -1.87 | 0.041 | 1.08  | 0.52  | -1.15 | 0.568 | -1.15 | 0.473 | -0.77 |
| 1428588_a_at | Mrpl41             | mitochondrial ribosomal protein L41                                            | -1.01 | 0.903 | -1.13 | 0.416 | -1.61 | 0.025 | 1.19  | 0.262 | -0.64 |
| 1422979_at   | Suv39h2            | suppressor of variegation 3-9 homolog 2 (Drosophila)                           | -1.14 | 0.805 | -1.18 | 0.763 | -1.31 | 0.523 | 3.91  | 0.238 | 0.07  |
| 1431844_at   | Kcnmb2             | potassium large conductance calcium-activated channel, subfamily M, beta meml  | -1.61 | 0.021 | -1.6  | 0.574 | 1.25  | 0.221 | -1.75 | 0.218 | -0.93 |
| 1433437_at   | Dock8              | dedicator of cytokinesis 8                                                     | -1.97 | 0.087 | -1.54 | 0.108 | 1.33  | 0.666 | -2.25 | 0.385 | -1.11 |
| 1443819_x_at | Fis1               | fission 1 (mitochondrial outer membrane) homolog (yeast)                       | 1.03  | 0.85  | -1.13 | 0.403 | -1.73 | 0.053 | -1.24 | 0.436 | -0.77 |
| 1457178_at   | Rabgap11           | RAB GTPase activating protein 1-like                                           | -1.33 | 0.345 | -1.12 | 0.522 | -1.18 | 0.485 | 1.2   | 0.159 | -0.61 |
| 1427540_at   | Zwint              | ZW10 interactor                                                                | -1.14 | 0.176 | -1.26 | 0.418 | -1.21 | 0.252 | 1.33  | 0.47  | -0.57 |
| 1449676_at   | Rab2               | RAB2, member RAS oncogene family                                               | 1.11  | 0.682 | -1.15 | 0.552 | -1.97 | 0.045 | -1.9  | 0.172 | -0.98 |
| 1460668_at   | Gal                | galanin                                                                        | -1.26 | 0.514 | 1.11  | 0.809 | -1.71 | 0.13  | -1.14 | 0.771 | -0.75 |
| 1426718_at   | Skiv2l2            | superkiller viralicidic activity 2-like 2 (S. cerevisiae)                      | -1.12 | 0.597 | -1.25 | 0.013 | -1.25 | 0.06  | 1     | 0.98  | -0.65 |
| 1453396_at   | 1700123D08Rik      | RIKEN cDNA 1700123D08 gene                                                     | -1.68 | 0.278 | -1.3  | 0.447 | 1.13  | 0.861 | -1.43 | 0.534 | -0.82 |
| 1458460_at   | Stim1              | Stromal interaction molecule 1                                                 | -1.15 | 0.723 | 1     | 0.983 | -1.62 | 0.032 | -1.35 | 0.156 | -0.78 |
| 1420053_at   | Psmb1              | Proteasome (prosome, macropain) subunit, beta type 1                           | -1.15 | 0.663 | -1.13 | 0.548 | -1.35 | 0.342 | 1.04  | 0.883 | -0.65 |
| 1460577_at   | AA591059           | Expressed sequence AA591059                                                    | -1.19 | 0.048 | -1.13 | 0.367 | -1.31 | 0.097 | 1.4   | 0.263 | -0.56 |
| 1456866_x_at | 1700027D21Rik      | RIKEN cDNA 1700027D21 gene                                                     | 1.19  | 0.585 | -1.76 | 0.133 | -1.37 | 0.591 | -1.19 | 0.646 | -0.78 |
| 1448532_at   | Prp2               | prolactin-like protein C 2                                                     | -2.25 | 0.271 | 1.55  | 0.249 | -2.01 | 0.252 | -1.31 | 0.618 | -1    |
| 1435160_at   | 1110064P04Rik      | RIKEN cDNA 1110064P04 gene                                                     | -1.05 | 0.847 | -1.07 | 0.697 | -1.64 | 0.023 | 1.08  | 0.52  | -0.67 |
| 1427053_at   | Abi3bp             | ABI gene family, member 3 (NESH) binding protein                               | 1.28  | 0.501 | -1.7  | 0.021 | -1.61 | 0.243 | -1.62 | 0.22  | -0.91 |

|              |                    |                                                                                       |       |         |       |       |       |       |       |       |       |
|--------------|--------------------|---------------------------------------------------------------------------------------|-------|---------|-------|-------|-------|-------|-------|-------|-------|
| 1457890_at   | D6Ert234e          | DNA segment, Chr 6, ERATO Doi 234, expressed                                          | -1.15 | 0.807   | -1.08 | 0.638 | -1.43 | 0.44  | 2.11  | 0.261 | -0.39 |
| 1444338_at   | ---                | ---                                                                                   | -3.87 | 0.009   | 1.26  | 0.763 | -1.02 | 0.951 | -1.23 | 0.696 | -1.22 |
| 1428761_a_at | Snabc3             | small nuclear RNA activating complex, polypeptide 3                                   | 1.22  | 0.446   | -1.6  | 0.07  | -1.54 | 0.011 | -1.41 | 0.431 | -0.83 |
| 1447748_x_at | Slc29a2            | solute carrier family 29 (nucleoside transporters), member 2                          | 1.06  | 0.756   | -1.57 | 0.282 | -1.25 | 0.607 | -1.12 | 0.824 | -0.72 |
| 1417005_at   | Kns2               | kinesin 2                                                                             | -1.05 | 0.856   | -1.46 | 0.034 | -1.17 | 0.526 | 1.08  | 0.661 | -0.65 |
| 1437362_at   | A930028L21Rik      | RIKEN cDNA A930028L21 gene                                                            | -1.16 | 0.504   | -1.6  | 0.22  | 1.01  | 0.981 | -1.4  | 0.163 | -0.79 |
| 1445646_at   | Btbd1              | BTB (POZ) domain containing 1                                                         | 1.12  | 0.426   | -1.22 | 0.259 | -1.81 | 0.022 | -1.69 | 0.228 | -0.9  |
| 1455510_at   | Spop               | Speckle-type POZ protein                                                              | -1.1  | 0.305   | -1.11 | 0.104 | -1.46 | 0.093 | 1.08  | 0.737 | -0.65 |
| 1424853_s_at | Cyp4a10 /// BC013  | cytochrome P450, family 4, subfamily a, polypeptide 10 /// cDNA sequence BC01         | -1    | 0.836   | -1.97 | 0.151 | -1.01 | 0.92  | 1.55  | 0.533 | -0.61 |
| 1445134_at   | Mkl2               | MKL/myocardin-like 2                                                                  | 1.37  | 0.627   | -1.94 | 0.31  | -1.65 | 0.203 | -1.76 | 0.473 | -0.99 |
| 1434800_at   | Sv2b               | synaptic vesicle glycoprotein 2 b                                                     | -2.09 | 0.033   | 1.18  | 0.717 | -1.2  | 0.528 | -1.36 | 0.194 | -0.87 |
| 1432814_at   | 2900064F13Rik      | RIKEN cDNA 2900064F13 gene                                                            | 1     | 0.996   | -1.92 | 0.409 | -1.03 | 0.869 | -2.5  | 0.252 | -1.11 |
| 1460730_at   | Eif2b1             | eukaryotic translation initiation factor 2B, subunit 1 (alpha)                        | -1.32 | 0.2     | -1.23 | 0.035 | -1.09 | 0.505 | 1.34  | 0.341 | -0.57 |
| 1453284_at   | 4930405M20Rik      | RIKEN cDNA 4930405M20 gene                                                            | -1.2  | 0.221   | -1.42 | 0.011 | -1.05 | 0.51  | 1.06  | 0.734 | -0.65 |
| 1431019_at   | Lrrc28             | leucine rich repeat containing 28                                                     | -1.25 | 0.384   | -1.22 | 0.442 | -1.15 | 0.688 | 1.29  | 0.687 | -0.58 |
| 1420183_at   | Lor                | Loricrin                                                                              | -1.3  | 0.333   | -1.16 | 0.722 | -1.16 | 0.706 | 1.01  | 0.982 | -0.65 |
| 1443012_at   | Tcf12              | Transcription factor 12                                                               | -1.33 | 0.215   | 1.21  | 0.367 | -1.89 | 0.016 | -1.65 | 0.211 | -0.91 |
| 1443247_at   | Gfod1              | Glucose-fructose oxidoreductase domain containing 1                                   | -1.79 | 0.281   | 1.28  | 0.411 | -1.53 | 0.369 | -1.44 | 0.19  | -0.87 |
| 1458494_at   | ---                | Transcribed locus                                                                     | 1.25  | 0.679   | -2.23 | 0.259 | -1.25 | 0.629 | -1.37 | 0.597 | -0.9  |
| 1422668_at   | Serpnb9b           | serine (or cysteine) peptidase inhibitor, clade B, member 9b                          | -1.47 | 0.299   | -1.18 | 0.581 | -1.03 | 0.938 | 1.29  | 0.142 | -0.6  |
| 1434135_at   | B3galnt2           | UDP-GalNAc:betaGlcNAc beta 1,3-galactosaminyltransferase, polypeptide 2               | -1.34 | 0.124   | -1.06 | 0.593 | -1.25 | 0.192 | 1.01  | 0.95  | -0.66 |
| 1452837_at   | Lpin2              | lipin 2                                                                               | -1.16 | 0.305   | -1.28 | 0.472 | -1.18 | 0.208 | 1.95  | 0.104 | -0.42 |
| 1422307_at   | ---                | ---                                                                                   | -1.03 | 0.838   | -1.22 | 0.235 | -1.41 | 0.154 | 1.52  | 0.154 | -0.54 |
| 1442264_at   | Rasgrp2            | RAS, guanyl releasing protein 2                                                       | 1.03  | 0.558   | -1.14 | 0.46  | -1.7  | 0.006 | -1.74 | 0.094 | -0.89 |
| 1433912_at   | Tipr1              | TIP41, TOR signalling pathway regulator-like (S. cerevisiae)                          | -1.19 | 0.591   | -1.21 | 0.255 | -1.21 | 0.115 | 1.04  | 0.86  | -0.64 |
| 1447596_at   | ---                | Transcribed locus                                                                     | -1.18 | 0.662   | -1.45 | 0.473 | -1.04 | 0.299 | 1.2   | 0.281 | -0.62 |
| 1447224_at   | ---                | Transcribed locus                                                                     | -1.82 | 0.563   | 1.14  | 0.778 | -1.25 | 0.664 | -1.33 | 0.615 | -0.81 |
| 1454957_at   | Nob1               | NIN1/RPN12 binding protein 1 homolog (S. cerevisiae)                                  | -1.03 | 0.887   | -1.47 | 0.034 | -1.2  | 0.402 | 1.12  | 0.658 | -0.64 |
| 1430414_at   | 5730406G12Rik      | RIKEN cDNA 5730406G12 gene                                                            | -1.21 | 0.317   | -1.38 | 0.252 | -1.06 | 0.819 | 1.28  | 0.339 | -0.59 |
| 1441574_at   | Pitpnc1            | Phosphatidylinositol transfer protein, cytoplasmic 1                                  | -1.35 | 0.074   | 1.05  | 0.862 | -1.44 | 0.237 | -1.34 | 0.238 | -0.77 |
| 1431731_at   | Bnip2              | BCL2/adenovirus E1B interacting protein 1, NIP2                                       | 1.12  | #DIV/0! | -1.09 | 0.365 | -2.19 | 0.301 | -1.05 | 0.907 | -0.8  |
| 1437329_at   | Ptpb               | protein tyrosine phosphatase-like (proline instead of catalytic arginine), member b   | -1.16 | 0.324   | -1.05 | 0.132 | -1.47 | 0.084 | 1.15  | 0.656 | -0.63 |
| 1424801_at   | Enah               | enabled homolog (Drosophila)                                                          | 1.07  | 0.377   | -1.61 | 0.343 | -1.25 | 0.207 | -1.4  | 0.107 | -0.8  |
| 1451545_at   | Tdrd3              | tudor domain containing 3                                                             | -1.11 | 0.396   | -1.14 | 0.493 | -1.4  | 0.024 | 1.27  | 0.385 | -0.59 |
| 1439647_at   | LOC545611          | hypothetical LOC545611                                                                | -1.39 | 0.394   | -1.26 | 0.116 | -1.02 | 0.899 | 1.06  | 0.534 | -0.65 |
| 1452157_at   | Eprs /// LOC633671 | glutamyl-prolyl-tRNA synthetase /// similar to Bifunctional aminoacyl-tRNA synthetase | -1.25 | 0.215   | -1.11 | 0.479 | -1.26 | 0.117 | 1.33  | 0.255 | -0.57 |
| 1444391_at   | ---                | Transcribed locus                                                                     | 1.13  | 0.473   | -2.04 | 0.25  | -1.14 | 0.535 | -1.39 | 0.336 | -0.86 |
| 1444912_at   | ---                | ---                                                                                   | 1.25  | 0.56    | -1.54 | 0.242 | -1.69 | 0.107 | -1.45 | 0.22  | -0.86 |
| 1453975_a_at | 1700029M20Rik      | RIKEN cDNA 1700029M20 gene                                                            | 1.14  | 0.77    | -1.18 | 0.818 | -1.97 | 0.272 | -1.21 | 0.17  | -0.81 |
| 1450475_at   | Dlx3               | distal-less homeobox 3                                                                | -2.99 | 0.215   | -1.23 | 0.631 | 1.35  | 0.52  | -1.76 | 0.132 | -1.16 |
| 1417182_at   | Dnaja2             | DnaJ (Hsp40) homolog, subfamily A, member 2                                           | -1.24 | 0.076   | -1.18 | 0.244 | -1.19 | 0.368 | 1.04  | 0.891 | -0.64 |
| 1450193_at   | Hcn1               | hyperpolarization-activated, cyclic nucleotide-gated K+ 1                             | -2.72 | 0.026   | 1.55  | 0.477 | -1.73 | 0.082 | -1.2  | 0.626 | -1.03 |
| 1453869_at   | LOC328277          | hypothetical protein LOC328277                                                        | -1.26 | 0.578   | -1.18 | 0.525 | -1.16 | 0.187 | 1.13  | 0.723 | -0.62 |
| 1444956_at   | Gabarapl2          | Gamma-aminobutyric acid (GABA-A) receptor-associated protein-like 2                   | -1.22 | 0.482   | -1.32 | 0.612 | -1.09 | 0.458 | 2.07  | 0.179 | -0.39 |
| 1430758_x_at | Bcas1              | breast carcinoma amplified sequence 1                                                 | -1.65 | 0.445   | -1.38 | 0.516 | 1.16  | 0.777 | -1.81 | 0.657 | -0.92 |
| 1457971_at   | Cspp1              | Centrosome and spindle pole associated protein 1                                      | 1.27  | 0.555   | -1.74 | 0.113 | -1.53 | 0.074 | -2.02 | 0.032 | -1.01 |
| 1432645_at   | Atrn               | Attractin                                                                             | 1     | 0.996   | -1.19 | 0.62  | -1.54 | 0.115 | -1.14 | 0.812 | -0.71 |
| 1432316_at   | 4933439N14Rik      | RIKEN cDNA 4933439N14 gene                                                            | 1.03  | 0.719   | -1.83 | 0.063 | -1.08 | 0.903 | -1.04 | 0.963 | -0.73 |
| 1449999_a_at | Cacna2d1           | calcium channel, voltage-dependent, alpha2/delta subunit 1                            | -2.3  | 0.065   | 1.43  | 0.587 | -1.58 | 0.014 | -1.13 | 0.832 | -0.89 |
| 1428008_at   | Dnm1l              | dynamitin 1-like                                                                      | 1.35  | 0.598   | -2.01 | 0.357 | -1.54 | 0.135 | -1.09 | 0.893 | -0.82 |
| 1424098_at   | Elovl7             | ELOVL family member 7, elongation of long chain fatty acids (yeast)                   | -1.01 | 0.853   | -1.47 | 0.324 | -1.21 | 0.332 | 2.3   | 0.015 | -0.35 |
| 1420181_at   | 1700011M02Rik ///  | RIKEN cDNA 1700011M02 gene /// hypothetical protein LOC668339                         | -1.34 | 0.427   | 1.03  | 0.937 | -1.39 | 0.587 | -1.91 | 0.479 | -0.9  |
| 1451690_a_at | Pvrl4              | poliovirus receptor-related 4                                                         | -1.06 | 0.923   | -1.41 | 0.456 | -1.19 | 0.54  | 2     | 0.403 | -0.41 |

|              |                   |                                                                                              |       |       |       |       |       |       |       |       |       |
|--------------|-------------------|----------------------------------------------------------------------------------------------|-------|-------|-------|-------|-------|-------|-------|-------|-------|
| 1436977_at   | Eps8              | Epidermal growth factor receptor pathway substrate 8                                         | -1.19 | 0.215 | 1.17  | 0.665 | -2.07 | 0.035 | -1.12 | 0.316 | -0.8  |
| 1458605_at   | Arl15             | ADP-ribosylation factor-like 15                                                              | -1.2  | 0.65  | 1.15  | 0.453 | -1.96 | 0.034 | -1.14 | 0.719 | -0.79 |
| 1446248_at   | Slc18a1           | solute carrier family 18 (vesicular monoamine), member 1                                     | -1.07 | 0.845 | -1.46 | 0.196 | -1.14 | 0.261 | 1.42  | 0.012 | -0.56 |
| 1416681_at   | Ube3a             | ubiquitin protein ligase E3A                                                                 | -1.04 | 0.782 | -1.24 | 0.111 | -1.37 | 0.183 | 1.15  | 0.679 | -0.63 |
| 1455055_at   | 4930562D19Rik     | RIKEN cDNA 4930562D19 gene                                                                   | -1.26 | 0.221 | -1.72 | 0.004 | 1.12  | 0.511 | -1.11 | 0.022 | -0.74 |
| 1434598_at   | Larp5             | La ribonucleoprotein domain family, member 5                                                 | -1.27 | 0.159 | -1.18 | 0.03  | -1.16 | 0.142 | 1.14  | 0.5   | -0.62 |
| 1422159_at   | Ppef2             | protein phosphatase, EF hand calcium-binding domain 2                                        | -1.23 | 0.376 | -1.53 | 0.447 | 1.03  | 0.881 | -1.21 | 0.202 | -0.74 |
| 1453161_at   | Thrap1            | thyroid hormone receptor associated protein 1                                                | -1    | 1     | -2.29 | 0.062 | 1.06  | 0.863 | -2.14 | 0.103 | -1.09 |
| 1436895_at   | Centd1            | centaurin, delta 1                                                                           | 1.17  | 0.694 | -1.28 | 0.236 | -1.82 | 0.044 | -1.56 | 0.362 | -0.87 |
| 1460292_a_at | Smarca1           | SWI/SNF related, matrix associated, actin dependent regulator of chromatin, subunit 1        | 1.14  | 0.787 | -1.2  | 0.738 | -1.88 | 0.074 | -1.17 | 0.724 | -0.78 |
| 1431104_at   | 4930522H14Rik     | RIKEN cDNA 4930522H14 gene                                                                   | -2.2  | 0.446 | 1.06  | 0.815 | -1.02 | 0.904 | -2.59 | 0.006 | -1.19 |
| 1447331_at   | Fbxo42            | F-box protein 42                                                                             | -1.41 | 0.5   | -1.2  | 0.773 | -1.05 | 0.925 | 1.72  | 0.411 | -0.49 |
| 1419409_at   | Sprr15            | small proline rich-like 5                                                                    | 1.02  | 0.969 | -1.31 | 0.658 | -1.41 | 0.269 | -1.05 | 0.946 | -0.69 |
| 1454599_at   | 4930425F17Rik     | RIKEN cDNA 4930425F17 gene                                                                   | -1.08 | 0.801 | -1.47 | 0.109 | -1.12 | 0.502 | 1.3   | 0.283 | -0.59 |
| 1432409_at   | Prkar2a           | protein kinase, cAMP dependent regulatory, type II alpha                                     | 1.14  | 0.411 | -1.84 | 0.322 | -1.23 | 0.673 | -1.04 | 0.932 | -0.74 |
| 1441467_at   | Tspan5            | Tetraspanin 5                                                                                | -1.09 | 0.744 | 1.21  | 0.629 | -2.68 | 0.117 | -1.61 | 0.126 | -1.04 |
| 1427049_s_at | Smo               | smoothened homolog (Drosophila)                                                              | -1.07 | 0.538 | -1.1  | 0.66  | -1.53 | 0.223 | 1.05  | 0.79  | -0.66 |
| 1454014_a_at | Mkks              | McKusick-Kaufman syndrome protein                                                            | -1.11 | 0.502 | -1.18 | 0.135 | -1.34 | 0.027 | 1.01  | 0.949 | -0.65 |
| 1420522_at   | Ccdc50            | coiled-coil domain containing 50                                                             | -1.47 | 0.143 | -1.57 | 0.004 | 1.18  | 0.3   | -1.21 | 0.501 | -0.77 |
| 1438403_s_at | ---               | ---                                                                                          | 1.19  | 0.811 | -1.27 | 0.17  | -1.91 | 0.212 | -1.16 | 0.695 | -0.79 |
| 1460149_at   | Atp13a5           | ATPase type 13A5                                                                             | -1.16 | 0.586 | -1.01 | 0.977 | -1.56 | 0.449 | 2.39  | 0.308 | -0.33 |
| 1422297_at   | Pfdn5             | prefoldin 5                                                                                  | -1.71 | 0.208 | -1.28 | 0.652 | 1.13  | 0.85  | -1.58 | 0.283 | -0.86 |
| 1458044_at   | Cml1              | camello-like 1                                                                               | -1.68 | 0.437 | -1.09 | 0.857 | -1.02 | 0.956 | 1.15  | 0.742 | -0.66 |
| 1421096_at   | Trpc1             | transient receptor potential cation channel, subfamily C, member 1                           | -1.17 | 0.624 | -1.06 | 0.878 | -1.44 | 0.199 | 1.02  | 0.855 | -0.66 |
| 1424371_at   | Psmf1             | proteasome (prosome, macropain) inhibitor subunit 1                                          | -1.17 | 0.631 | -1.3  | 0.335 | -1.14 | 0.392 | 1.98  | 0.159 | -0.41 |
| 1444526_at   | Ssr1              | signal sequence receptor, alpha                                                              | 1.05  | 0.94  | -1.58 | 0.342 | -1.23 | 0.525 | -1.16 | 0.698 | -0.73 |
| 1454489_at   | 4930513L20Rik     | RIKEN cDNA 4930513L20 gene                                                                   | -1.31 | 0.63  | -1.1  | 0.848 | -1.22 | 0.622 | 1.57  | 0.47  | -0.51 |
| 1444993_at   | LOC664949 /// LOC | similar to mortality factor 4 like 1 (predicted) /// similar to mortality factor 4 like 1 (t | -1.08 | 0.855 | -2.22 | 0.376 | 1.13  | 0.54  | -3.18 | 0.12  | -1.34 |
| 1436277_at   | D330010C22Rik     | RIKEN cDNA 330010C22 gene                                                                    | -1.53 | 0.152 | -1.76 | 0.09  | 1.28  | 0.68  | -2.08 | 0.006 | -1.02 |
| 1434037_s_at | Pcaf              | p300/CBP-associated factor                                                                   | -1.08 | 0.579 | -1.3  | 0.011 | -1.25 | 0.102 | 1.18  | 0.132 | -0.61 |
| 1420259_at   | Pkp2              | Plakophilin 2                                                                                | -1.84 | 0.236 | 1.35  | 0.138 | -1.67 | 0.156 | -1.15 | 0.67  | -0.83 |
| 1420037_at   | Atp5a1            | ATP synthase, H+ transporting, mitochondrial F1 complex, alpha subunit, isoform              | 1.05  | 0.856 | -1.09 | 0.358 | -1.87 | 0.054 | -1.24 | 0.586 | -0.79 |
| 1455590_at   | Nqo2              | NAD(P)H dehydrogenase, quinone 2                                                             | -1.15 | 0.159 | -1.16 | 0.565 | -1.31 | 0.04  | 1.02  | 0.617 | -0.65 |
| 1433089_at   | ---               | ---                                                                                          | -1.76 | 0.535 | 1.39  | 0.296 | -1.86 | 0.336 | -2.27 | 0.366 | -1.12 |
| 1444376_at   | Sesn1             | Sestrin 1                                                                                    | -1.08 | 0.457 | 1.1   | 0.756 | -2.09 | 0.049 | -1.71 | 0.081 | -0.94 |
[truncated: 7,085,424 more chars]
